# Supplementary material
Source: PubMed Central journal article supplement (PMC8574066)
Supplement: NIHMS1747347-supplement-3.pdf [file NIHMS1747347-supplement-3.pdf]

|    | name     | fold     | log2fold | tstat    | pvalue   | qvalue   | updown | mzmed    | mzmin    |
|----|----------|----------|----------|----------|----------|----------|--------|----------|----------|
| 1  | M358T17_ | 6.432159 | -2.6853  | -12.7146 | 1.56E-06 | 0.010023 | DOWN   | 358.099  | 358.0986 |
| 2  | M407T32  | 2.794809 | -1.48275 | -7.11917 | 0.000138 | 0.255882 | DOWN   | 407.1368 | 407.1367 |
| 3  | M560T31_ | 8.821993 | 3.141105 | 8.364387 | 0.000341 | 0.306974 | UP     | 560.0806 | 560.0803 |
| 4  | M585T26  | 5.880264 | 2.555881 | 5.557371 | 0.000643 | 0.327966 | UP     | 584.948  | 584.9476 |
| 5  | M309T2   | 2.52584  | 1.336763 | 5.367224 | 0.000985 | 0.336996 | UP     | 308.8998 | 308.8994 |
| 6  | M327T20_ | 3.999303 | -1.99975 | -5.78093 | 0.001082 | 0.338555 | DOWN   | 327.0963 | 327.0957 |
| 7  | M362T17_ | 7.863715 | -2.97521 | -5.66193 | 0.001478 | 0.34291  | DOWN   | 362.0944 | 362.0942 |
| 8  | M173T2   | 2.48199  | 1.311497 | 5.421253 | 0.001856 | 0.345376 | UP     | 172.9768 | 172.9766 |
| 9  | M335T31  | 2.310379 | -1.20813 | -5.22284 | 0.001895 | 0.345573 | DOWN   | 335.0942 | 335.0942 |
| 10 | M424T19_ | 10.06235 | -3.3309  | -6.03496 | 0.002019 | 0.34616  | DOWN   | 424.0408 | 424.0402 |
| 11 | M492T24_ | 2.559287 | -1.35574 | -5.30085 | 0.002096 | 0.346489 | DOWN   | 492.345  | 492.3442 |
| 12 | M197T12  | 5.757151 | 2.525355 | 6.014849 | 0.002577 | 0.348112 | UP     | 197.1173 | 197.1173 |
| 13 | M1005T44 | 5.118675 | 2.355771 | 4.504246 | 0.002616 | 0.348219 | UP     | 1005.496 | 1005.496 |
| 14 | M173T3   | 3.005966 | 1.587829 | 6.128393 | 0.002665 | 0.348348 | UP     | 172.9771 | 172.9769 |
| 15 | M192T3   | 2.586272 | 1.370874 | 4.698708 | 0.003529 | 0.350041 | UP     | 192.008  | 192.0079 |
| 16 | M1151T44 | 9.09867  | 3.185656 | 5.201235 | 0.003778 | 0.350387 | UP     | 1150.806 | 1150.806 |
| 17 | M487T30_ | 2.167976 | 1.116349 | 5.035162 | 0.00393  | 0.350577 | UP     | 486.8257 | 486.8211 |
| 18 | M517T19  | 4.937604 | 2.303811 | 4.569535 | 0.004041 | 0.350707 | UP     | 517.2291 | 517.2284 |
| 19 | M378T18_ | 1.828522 | -0.87068 | -3.86138 | 0.0048   | 0.351436 | DOWN   | 378.1775 | 378.1768 |
| 20 | M360T17  | 6.349507 | -2.66664 | -4.45131 | 0.00508  | 0.35165  | DOWN   | 360.0959 | 360.0956 |
| 21 | M598T42  | 1.915781 | 0.937932 | 3.883237 | 0.005127 | 0.351684 | UP     | 598.086  | 598.0838 |
| 22 | M480T43  | 1.458345 | 0.544332 | 4.303428 | 0.00525  | 0.35177  | UP     | 480.3477 | 480.347  |
| 23 | M787T44  | 4.227687 | 2.079869 | 3.800065 | 0.005372 | 0.351851 | UP     | 787.2684 | 787.2683 |
| 24 | M284T3   | 23.48456 | -4.55364 | -5.35627 | 0.005672 | 0.352035 | DOWN   | 284.1636 | 284.1635 |
| 25 | M325T20  | 3.623889 | -1.85754 | -4.01008 | 0.0058   | 0.352108 | DOWN   | 325.0993 | 325.0985 |
| 26 | M708T31  | 3.390787 | -1.76162 | -3.81196 | 0.00603  | 0.352231 | DOWN   | 708.1793 | 708.1785 |
| 27 | M391T44_ | 6.761612 | 2.757367 | 4.252117 | 0.006222 | 0.352327 | UP     | 390.9669 | 390.9669 |
| 28 | M322T26  | 2.528592 | -1.33833 | -3.64834 | 0.006528 | 0.352469 | DOWN   | 322.2383 | 322.2377 |
| 29 | M918T44  | 4.24086  | 2.084357 | 3.700753 | 0.006713 | 0.352548 | UP     | 917.6005 | 917.5987 |
| 30 | M1209T44 | 3.819143 | 1.933249 | 3.702049 | 0.006733 | 0.352556 | UP     | 1208.743 | 1208.742 |
| 31 | M408T36  | 3.263209 | -1.70629 | -3.75296 | 0.007037 | 0.352677 | DOWN   | 408.1551 | 408.1551 |
| 32 | M784T29  | 2.710368 | -1.43849 | -3.60349 | 0.00709  | 0.352697 | DOWN   | 784.1778 | 784.1772 |
| 33 | M191T32  | 2.870291 | 1.521197 | 3.597194 | 0.007109 | 0.352704 | UP     | 191.1431 | 191.1429 |
| 34 | M362T17_ | 4.542398 | -2.18345 | -4.38119 | 0.007474 | 0.352833 | DOWN   | 362.0001 | 361.9995 |
| 35 | M243T11  | 11.71342 | 3.550091 | 4.864057 | 0.007565 | 0.352863 | UP     | 243.1229 | 243.1228 |
| 36 | M224T25_ | 2.080658 | -1.05704 | -3.69376 | 0.007864 | 0.352958 | DOWN   | 224.0632 | 224.0629 |
| 37 | M723T33  | 2.62978  | 1.394942 | 3.569747 | 0.007918 | 0.352974 | UP     | 722.5059 | 722.5044 |
| 38 | M449T29_ | 2.450153 | 1.292872 | 3.541673 | 0.008278 | 0.353078 | UP     | 449.1558 | 449.1552 |
| 39 | M466T21  | 6.180439 | -2.62771 | -4.38589 | 0.008327 | 0.353091 | DOWN   | 466.1568 | 466.156  |
| 40 | M333T29_ | 74.79479 | 6.224866 | 4.841345 | 0.00838  | 0.353106 | UP     | 333.2428 | 333.2426 |
| 41 | M385T30  | 2.094929 | -1.0669  | -3.49606 | 0.008461 | 0.353127 | DOWN   | 385.1827 | 385.1824 |
| 42 | M388T30  | 2.058095 | 1.041309 | 3.499306 | 0.008771 | 0.353206 | UP     | 388.2445 | 388.244  |
| 43 | M438T39  | 2.070217 | -1.04978 | -3.77603 | 0.009004 | 0.353261 | DOWN   | 438.1865 | 438.1865 |
| 44 | M278T25  | 3.290054 | -1.71811 | -4.03139 | 0.009479 | 0.353366 | DOWN   | 278.1965 | 278.1963 |
| 45 | M501T22  | 13.53999 | 3.759155 | 4.579623 | 0.009547 | 0.353381 | UP     | 501.1787 | 501.1762 |
| 46 | M361T44  | 2.830947 | -1.50128 | -3.72719 | 0.010053 | 0.35348  | DOWN   | 361.1903 | 361.1861 |

|    |          |          |          |          |          |          |      |          |          |
|----|----------|----------|----------|----------|----------|----------|------|----------|----------|
| 47 | M661T43  | 3.68205  | 1.880509 | 3.351894 | 0.010129 | 0.353494 | UP   | 661.4611 | 661.4606 |
| 48 | M646T11  | 5.432734 | 2.441678 | 3.538335 | 0.010187 | 0.353505 | UP   | 646.4017 | 646.4013 |
| 49 | M321T17_ | 4.84779  | -2.27733 | -4.06046 | 0.010308 | 0.353527 | DOWN | 320.9739 | 320.9732 |
| 50 | M524T44  | 7.332723 | 2.874349 | 3.65179  | 0.010439 | 0.35355  | UP   | 524.1394 | 524.139  |
| 51 | M422T19_ | 7.023931 | -2.81228 | -3.96426 | 0.010472 | 0.353555 | DOWN | 422.0422 | 422.0415 |
| 52 | M590T33  | 3.921604 | 1.971444 | 3.597692 | 0.010546 | 0.353568 | UP   | 590.4267 | 590.4254 |
| 53 | M498T44  | 4.705078 | 2.234219 | 3.336467 | 0.010567 | 0.353572 | UP   | 498.1236 | 498.1233 |
| 54 | M284T31  | 7.94635  | 2.990292 | 4.343117 | 0.010675 | 0.35359  | UP   | 284.2093 | 284.2091 |
| 55 | M311T44  | 2.807858 | 1.48947  | 3.534602 | 0.010721 | 0.353597 | UP   | 311.167  | 311.1667 |
| 56 | M788T29  | 4.713305 | -2.23674 | -3.73137 | 0.010815 | 0.353613 | DOWN | 788.173  | 788.1716 |
| 57 | M201T3   | 2.019535 | 1.014023 | 4.310889 | 0.010825 | 0.353614 | UP   | 201.0083 | 201.0082 |
| 58 | M231T3   | 2.29502  | 1.198507 | 4.26831  | 0.010987 | 0.35364  | UP   | 230.8899 | 230.8899 |
| 59 | M263T22_ | 5.747563 | -2.52295 | -4.2618  | 0.011249 | 0.35368  | DOWN | 263.0813 | 263.0808 |
| 60 | M635T33  | 3.39887  | 1.765055 | 3.448129 | 0.011336 | 0.353693 | UP   | 635.4565 | 635.4552 |
| 61 | M352T44  | 2.920807 | 1.546367 | 3.382749 | 0.011892 | 0.353771 | UP   | 352.1937 | 352.1931 |
| 62 | M679T33  | 2.869355 | 1.520727 | 3.246763 | 0.011966 | 0.353781 | UP   | 679.483  | 679.4817 |
| 63 | M394T44  | 2.928436 | 1.550131 | 3.318474 | 0.011978 | 0.353782 | UP   | 394.2232 | 394.2229 |
| 64 | M391T37  | 2.67386  | -1.41892 | -3.5831  | 0.012138 | 0.353803 | DOWN | 391.2953 | 391.2951 |
| 65 | M535T26  | 4.704545 | 2.234055 | 3.245429 | 0.012204 | 0.353812 | UP   | 534.9289 | 534.9287 |
| 66 | M179T16_ | 5.085029 | 2.346256 | 4.266445 | 0.012246 | 0.353817 | UP   | 179.1068 | 179.1068 |
| 67 | M409T21_ | 5.56136  | -2.47544 | -4.04216 | 0.012383 | 0.353834 | DOWN | 409.1165 | 409.1156 |
| 68 | M266T22  | 5.935389 | -2.56934 | -4.20346 | 0.012463 | 0.353844 | DOWN | 266.0739 | 266.0733 |
| 69 | M634T33  | 3.062981 | 1.614936 | 3.250631 | 0.01264  | 0.353865 | UP   | 634.453  | 634.4519 |
| 70 | M351T29_ | 4.556248 | 2.187846 | 4.209858 | 0.012651 | 0.353866 | UP   | 351.1621 | 351.1618 |
| 71 | M291T33_ | 3.03111  | 1.599846 | 3.25737  | 0.012778 | 0.353881 | UP   | 291.2321 | 291.232  |
| 72 | M264T22_ | 5.915237 | -2.56444 | -3.85656 | 0.012827 | 0.353887 | DOWN | 264.0749 | 264.0745 |
| 73 | M548T36  | 2.988548 | -1.57944 | -4.02385 | 0.012836 | 0.353888 | DOWN | 548.3796 | 548.3787 |
| 74 | M318T22  | 1.88557  | -0.915   | -3.39676 | 0.012947 | 0.353901 | DOWN | 318.1928 | 318.1927 |
| 75 | M463T21_ | 6.682462 | -2.74038 | -4.18266 | 0.012974 | 0.353904 | DOWN | 463.1745 | 463.1743 |
| 76 | M549T36  | 3.344626 | -1.74185 | -3.77398 | 0.013038 | 0.353911 | DOWN | 549.3825 | 549.3821 |
| 77 | M420T19  | 2.645328 | -1.40345 | -3.17881 | 0.013096 | 0.353917 | DOWN | 420.0456 | 420.0446 |
| 78 | M300T31_ | 3.717531 | -1.89434 | -3.67093 | 0.01318  | 0.353927 | DOWN | 300.1435 | 300.1429 |
| 79 | M607T44  | 2.367156 | 1.243155 | 3.172721 | 0.013202 | 0.353929 | UP   | 607.4269 | 607.4267 |
| 80 | M514T20  | 12.66887 | -3.66322 | -4.19935 | 0.013213 | 0.35393  | DOWN | 514.2317 | 514.231  |
| 81 | M546T33  | 4.455908 | 2.155719 | 3.551894 | 0.013356 | 0.353945 | UP   | 546.4002 | 546.3992 |
| 82 | M383T22_ | 4.2513   | 2.087904 | 3.176281 | 0.013533 | 0.353964 | UP   | 383.2525 | 383.2523 |
| 83 | M678T33  | 2.810493 | 1.490823 | 3.152163 | 0.013567 | 0.353967 | UP   | 678.4794 | 678.4782 |
| 84 | M363T23  | 121.2125 | 6.921395 | 4.21092  | 0.013575 | 0.353968 | UP   | 363.217  | 363.2168 |
| 85 | M502T45  | 3.499406 | 1.80711  | 3.210072 | 0.013775 | 0.353988 | UP   | 502.2283 | 502.2281 |
| 86 | M602T27  | 9.597564 | -3.26267 | -3.91128 | 0.013822 | 0.353993 | DOWN | 602.2428 | 602.2427 |
| 87 | M540T44_ | 5.197695 | 2.377872 | 3.342008 | 0.01387  | 0.353998 | UP   | 540.1536 | 540.1534 |
| 88 | M556T27_ | 7.555901 | -2.9176  | -3.82408 | 0.013911 | 0.354002 | DOWN | 556.2372 | 556.237  |
| 89 | M262T22_ | 7.183424 | -2.84467 | -4.0914  | 0.013926 | 0.354003 | DOWN | 262.0783 | 262.0776 |
| 90 | M683T43  | 3.408821 | 1.769273 | 3.128634 | 0.014141 | 0.354024 | UP   | 683.4744 | 683.4739 |
| 91 | M661T33  | 2.940415 | 1.55602  | 3.119661 | 0.01428  | 0.354037 | UP   | 661.4529 | 661.4514 |
| 92 | M425T21  | 4.473063 | -2.16126 | -3.72541 | 0.014317 | 0.354041 | DOWN | 425.1306 | 425.1293 |
| 93 | M496T43  | 1.247914 | 0.319519 | 3.446232 | 0.014558 | 0.354063 | UP   | 495.6919 | 495.6912 |

|     |          |          |          |          |          |          |      |          |          |
|-----|----------|----------|----------|----------|----------|----------|------|----------|----------|
| 94  | M998T44  | 3.647256 | 1.866811 | 3.094512 | 0.014788 | 0.354083 | UP   | 997.5043 | 997.5037 |
| 95  | M353T44_ | 2.873164 | 1.52264  | 3.113139 | 0.014844 | 0.354088 | UP   | 353.1968 | 353.1967 |
| 96  | M452T39  | 2.648062 | -1.40494 | -3.19444 | 0.015031 | 0.354103 | DOWN | 452.173  | 452.1725 |
| 97  | M290T36  | 2.00364  | -1.00262 | -3.08621 | 0.015038 | 0.354104 | DOWN | 290.2197 | 290.2196 |
| 98  | M627T31_ | 5.694392 | -2.50954 | -3.49251 | 0.015083 | 0.354108 | DOWN | 627.2437 | 627.2429 |
| 99  | M735T44  | 3.569554 | 1.835744 | 3.234246 | 0.015121 | 0.354111 | UP   | 735.3201 | 735.3195 |
| 100 | M597T31_ | 23.67634 | 4.565374 | 3.999479 | 0.015158 | 0.354114 | UP   | 597.1088 | 597.1079 |
| 101 | M380T32_ | 2.965976 | -1.56851 | -3.62174 | 0.015168 | 0.354115 | DOWN | 380.2071 | 380.2071 |
| 102 | M636T33  | 3.143084 | 1.652181 | 3.169553 | 0.015184 | 0.354116 | UP   | 636.4597 | 636.4587 |
| 103 | M499T6   | 3.874381 | -1.95397 | -3.50772 | 0.0152   | 0.354117 | DOWN | 499.1863 | 499.1862 |
| 104 | M775T44  | 5.299285 | 2.405798 | 3.105643 | 0.015301 | 0.354126 | UP   | 775.2397 | 775.2396 |
| 105 | M591T33  | 4.377516 | 2.130112 | 3.504651 | 0.015327 | 0.354128 | UP   | 591.4301 | 591.4288 |
| 106 | M411T21_ | 4.943566 | -2.30555 | -3.7208  | 0.015418 | 0.354135 | DOWN | 411.115  | 411.1108 |
| 107 | M919T44  | 4.741955 | 2.245482 | 3.225592 | 0.015535 | 0.354144 | UP   | 918.5949 | 918.5945 |
| 108 | M426T21_ | 3.966542 | -1.98788 | -3.5452  | 0.01569  | 0.354156 | DOWN | 426.1329 | 426.1324 |
| 109 | M300T19  | 3.798036 | 1.925254 | 3.807276 | 0.015752 | 0.354161 | UP   | 300.1808 | 300.1807 |
| 110 | M447T30_ | 11.41477 | 3.51283  | 4.006724 | 0.015877 | 0.354171 | UP   | 447.1671 | 447.1669 |
| 111 | M920T44  | 4.50093  | 2.170223 | 3.166724 | 0.016074 | 0.354185 | UP   | 919.5979 | 919.5976 |
| 112 | M211T16_ | 17.26625 | 4.109882 | 3.995543 | 0.016096 | 0.354187 | UP   | 211.1331 | 211.133  |
| 113 | M631T29_ | 4.561609 | 2.189543 | 3.13339  | 0.016168 | 0.354192 | UP   | 630.969  | 630.9688 |
| 114 | M267T17  | 9.848256 | 3.299868 | 3.979679 | 0.016237 | 0.354197 | UP   | 267.1593 | 267.1592 |
| 115 | M708T44  | 5.010709 | 2.325015 | 3.288014 | 0.016246 | 0.354198 | UP   | 708.3592 | 708.3588 |
| 116 | M364T3   | 24.81936 | 4.633394 | 3.978411 | 0.016365 | 0.354206 | UP   | 363.79   | 363.7898 |
| 117 | M391T25_ | 82.09346 | 6.359195 | 3.965964 | 0.01659  | 0.354222 | UP   | 391.1571 | 391.1571 |
| 118 | M521T31  | 131.5304 | 7.039252 | 3.960331 | 0.016672 | 0.354228 | UP   | 521.0765 | 521.0762 |
| 119 | M608T44_ | 2.709903 | 1.438241 | 3.096673 | 0.016923 | 0.354244 | UP   | 608.434  | 608.4332 |
| 120 | M162T3   | 21.7346  | 4.441921 | 3.914087 | 0.017052 | 0.354253 | UP   | 161.9609 | 161.9607 |
| 121 | M609T31_ | 9.283997 | -3.21475 | -3.75088 | 0.017337 | 0.354271 | DOWN | 609.2572 | 609.2568 |
| 122 | M175T3   | 10.97025 | 3.455524 | 3.844704 | 0.017402 | 0.354275 | UP   | 174.9562 | 174.9562 |
| 123 | M307T22_ | 5.565936 | -2.47662 | -3.71618 | 0.017452 | 0.354278 | DOWN | 307.1007 | 307.0998 |
| 124 | M391T44_ | 3.080712 | 1.623264 | 2.981341 | 0.017567 | 0.354286 | UP   | 391.2247 | 391.2244 |
| 125 | M296T31_ | 10.38359 | 3.376233 | 3.817228 | 0.017617 | 0.354289 | UP   | 296.2304 | 296.2302 |
| 126 | M450T30  | 4.849554 | 2.277852 | 3.70791  | 0.017617 | 0.354289 | UP   | 450.1658 | 450.1654 |
| 127 | M709T44  | 4.424488 | 2.145511 | 3.13391  | 0.017635 | 0.35429  | UP   | 709.3624 | 709.3622 |
| 128 | M350T40  | 2.021927 | -1.01573 | -3.0269  | 0.017717 | 0.354295 | DOWN | 350.1774 | 350.1772 |
| 129 | M229T16_ | 32.49455 | 5.022126 | 3.883251 | 0.017744 | 0.354296 | UP   | 229.1437 | 229.1436 |
| 130 | M265T15_ | 14.98104 | 3.905066 | 3.866076 | 0.017744 | 0.354296 | UP   | 265.1437 | 265.1436 |
| 131 | M609T44  | 2.635788 | 1.398235 | 3.111508 | 0.01777  | 0.354298 | UP   | 609.4373 | 609.4369 |
| 132 | M407T24  | 124.5964 | 6.961119 | 3.884072 | 0.017779 | 0.354298 | UP   | 407.1519 | 407.1518 |
| 133 | M562T32  | 4.300116 | 2.104375 | 2.971843 | 0.017824 | 0.354301 | UP   | 561.9978 | 561.9969 |
| 134 | M303T22_ | 6.584231 | -2.71902 | -3.79802 | 0.018113 | 0.354318 | DOWN | 303.1049 | 303.1041 |
| 135 | M427T21  | 4.983312 | -2.3171  | -3.55063 | 0.018213 | 0.354324 | DOWN | 427.1272 | 427.1262 |
| 136 | M337T21  | 12.17325 | 3.605643 | 3.836211 | 0.018245 | 0.354326 | UP   | 337.238  | 337.2379 |
| 137 | M411T18  | 8.232227 | -3.04128 | -3.48036 | 0.018255 | 0.354326 | DOWN | 410.9947 | 410.9947 |
| 138 | M497T21_ | 34.91022 | 5.125577 | 3.839529 | 0.018386 | 0.354334 | UP   | 497.2685 | 497.2681 |
| 139 | M408T29  | 2.964648 | -1.56786 | -3.55123 | 0.018539 | 0.354342 | DOWN | 408.2022 | 408.2018 |
| 140 | M985T44  | 5.218477 | 2.383629 | 3.205597 | 0.018546 | 0.354343 | UP   | 985.4747 | 985.4739 |

|     |          |          |          |          |          |          |      |          |          |
|-----|----------|----------|----------|----------|----------|----------|------|----------|----------|
| 141 | M407T21_ | 5.36796  | -2.42437 | -3.74846 | 0.018631 | 0.354347 | DOWN | 407.1198 | 407.1191 |
| 142 | M595T44  | 3.203694 | 1.679736 | 3.070882 | 0.018861 | 0.35436  | UP   | 595.4217 | 595.4214 |
| 143 | M712T44  | 1.498669 | 0.583682 | 3.270374 | 0.018903 | 0.354362 | UP   | 712.3544 | 712.3542 |
| 144 | M491T25  | 298.5634 | 8.221894 | 3.806573 | 0.018994 | 0.354367 | UP   | 491.0817 | 491.0813 |
| 145 | M347T30  | 1001.932 | 9.968568 | 3.805862 | 0.019007 | 0.354367 | UP   | 347.1308 | 347.1306 |
| 146 | M393T44  | 2.90606  | 1.539065 | 2.943003 | 0.01902  | 0.354368 | UP   | 393.22   | 393.2194 |
| 147 | M154T28  | 5.839495 | -2.54584 | -3.7412  | 0.019113 | 0.354373 | DOWN | 153.9482 | 153.9482 |
| 148 | M190T3   | 9.228014 | 3.20602  | 3.751619 | 0.019161 | 0.354375 | UP   | 189.9923 | 189.9923 |
| 149 | M399T30_ | 84.97176 | 6.408912 | 3.789107 | 0.019165 | 0.354376 | UP   | 399.323  | 399.3212 |
| 150 | M584T23_ | 2.393338 | -1.25902 | -2.99163 | 0.019188 | 0.354377 | DOWN | 584.3358 | 584.3353 |
| 151 | M537T26_ | 41.37582 | 5.370716 | 3.777818 | 0.019209 | 0.354378 | UP   | 537.0876 | 537.0875 |
| 152 | M606T31  | 11.82613 | -3.56391 | -3.70451 | 0.019287 | 0.354382 | DOWN | 606.2559 | 606.2548 |
| 153 | M463T33_ | 2.512575 | 1.329167 | 2.97068  | 0.019307 | 0.354383 | UP   | 463.1715 | 463.171  |
| 154 | M307T19_ | 2.191065 | 1.131632 | 2.993846 | 0.019316 | 0.354383 | UP   | 307.1546 | 307.154  |
| 155 | M324T32  | 2.57272  | -1.36329 | -3.69398 | 0.019444 | 0.35439  | DOWN | 324.2253 | 324.2251 |
| 156 | M451T24_ | 1379.402 | 10.42983 | 3.776525 | 0.019494 | 0.354392 | UP   | 451.1418 | 451.1417 |
| 157 | M580T26  | 10.38    | -3.37573 | -3.63601 | 0.019514 | 0.354393 | DOWN | 580.2225 | 580.2224 |
| 158 | M534T30_ | 207.1735 | 7.694696 | 3.765864 | 0.019672 | 0.354401 | UP   | 534.0879 | 534.0872 |
| 159 | M373T31_ | 701.6813 | 9.454672 | 3.757798 | 0.019811 | 0.354408 | UP   | 373.1464 | 373.1462 |
| 160 | M605T31  | 13.86566 | -3.79344 | -3.67755 | 0.019844 | 0.35441  | DOWN | 605.262  | 605.2612 |
| 161 | M706T31  | 2.873495 | -1.52281 | -2.92464 | 0.019856 | 0.35441  | DOWN | 706.1808 | 706.1799 |
| 162 | M690T12  | 3.696211 | 1.886047 | 2.917626 | 0.019864 | 0.354411 | UP   | 690.4278 | 690.4275 |
| 163 | M470T32  | 2.523109 | -1.3352  | -3.20529 | 0.019893 | 0.354412 | DOWN | 470.3326 | 470.3319 |
| 164 | M442T21_ | 3.36701  | -1.75147 | -3.31964 | 0.019895 | 0.354412 | DOWN | 442.1906 | 442.1897 |
| 165 | M476T23_ | 98.38739 | 6.620401 | 3.75073  | 0.01993  | 0.354414 | UP   | 476.2798 | 476.2796 |
| 166 | M302T17  | 3.23319  | 1.692958 | 3.738567 | 0.01998  | 0.354416 | UP   | 302.1966 | 302.1964 |
| 167 | M335T41_ | 62.90124 | 5.975017 | 3.745962 | 0.020015 | 0.354418 | UP   | 335.2583 | 335.2582 |
| 168 | M549T30  | 466.2152 | 8.864852 | 3.74381  | 0.020054 | 0.35442  | UP   | 549.0873 | 549.0868 |
| 169 | M535T25  | 70.33316 | 6.136133 | 3.740906 | 0.020081 | 0.354421 | UP   | 535.0718 | 535.0714 |
| 170 | M181T36  | 1.955634 | -0.96764 | -3.20624 | 0.020085 | 0.354421 | DOWN | 181.0767 | 181.0766 |
| 171 | M1215T44 | 4.030099 | 2.010815 | 2.981536 | 0.020099 | 0.354422 | UP   | 1214.737 | 1214.735 |
| 172 | M245T38  | 1.766685 | -0.82105 | -2.93339 | 0.020106 | 0.354422 | DOWN | 245.0129 | 245.0125 |
| 173 | M176T3   | 5.541684 | 2.470324 | 3.550296 | 0.020336 | 0.354433 | UP   | 175.9767 | 175.9766 |
| 174 | M465T25_ | 47.03001 | 5.55551  | 3.719296 | 0.020397 | 0.354435 | UP   | 465.1575 | 465.157  |
| 175 | M604T31  | 11.33896 | -3.50322 | -3.65638 | 0.020398 | 0.354436 | DOWN | 604.259  | 604.2578 |
| 176 | M378T18_ | 3.799506 | -1.92581 | -2.90771 | 0.020413 | 0.354436 | DOWN | 378.02   | 378.0199 |
| 177 | M213T10_ | 3.767293 | 1.913528 | 3.080011 | 0.020437 | 0.354437 | UP   | 213.1017 | 213.1013 |
| 178 | M595T27_ | 31.76237 | 4.989247 | 3.703489 | 0.020486 | 0.35444  | UP   | 595.057  | 595.0565 |
| 179 | M159T3   | 3.049801 | 1.608715 | 3.630488 | 0.020515 | 0.354441 | UP   | 158.9676 | 158.9613 |
| 180 | M497T25  | 595.4486 | 9.217833 | 3.71663  | 0.020534 | 0.354442 | UP   | 497.1473 | 497.147  |
| 181 | M492T44_ | 1.295042 | 0.372998 | 3.002977 | 0.020588 | 0.354444 | UP   | 492.3769 | 492.3761 |
| 182 | M749T44  | 4.76892  | 2.253663 | 3.117039 | 0.020615 | 0.354445 | UP   | 749.3859 | 749.3854 |
| 183 | M405T3   | 17.8058  | 4.154275 | 3.702229 | 0.020705 | 0.354449 | UP   | 404.8164 | 404.8163 |
| 184 | M375T31_ | 1289.582 | 10.33269 | 3.702561 | 0.020789 | 0.354453 | UP   | 375.1469 | 375.1467 |
| 185 | M516T20  | 10.24972 | -3.35751 | -3.63346 | 0.02081  | 0.354454 | DOWN | 516.2299 | 516.2293 |
| 186 | M362T33  | 2.215574 | -1.14768 | -2.87139 | 0.020814 | 0.354454 | DOWN | 362.1865 | 362.1865 |
| 187 | M527T21_ | 76.17929 | 6.251327 | 3.698194 | 0.020862 | 0.354456 | UP   | 527.2794 | 527.2791 |

|     |          |          |          |          |          |          |      |          |          |
|-----|----------|----------|----------|----------|----------|----------|------|----------|----------|
| 188 | M202T24  | 16.04285 | 4.003858 | 3.68568  | 0.021091 | 0.354466 | UP   | 202.082  | 202.0819 |
| 189 | M374T31_ | 1165.355 | 10.18655 | 3.680119 | 0.021201 | 0.354471 | UP   | 374.1495 | 374.1493 |
| 190 | M477T23_ | 195.4176 | 7.610416 | 3.671219 | 0.021367 | 0.354478 | UP   | 477.2832 | 477.2829 |
| 191 | M349T31_ | 150.928  | 7.237717 | 3.670286 | 0.02138  | 0.354478 | UP   | 349.1464 | 349.1461 |
| 192 | M547T33  | 5.084386 | 2.346074 | 3.348653 | 0.021388 | 0.354479 | UP   | 547.4037 | 547.403  |
| 193 | M608T31_ | 12.80648 | -3.6788  | -3.60301 | 0.021416 | 0.35448  | DOWN | 608.254  | 608.2534 |
| 194 | M381T23_ | 83.40113 | 6.381995 | 3.667943 | 0.021423 | 0.35448  | UP   | 381.2276 | 381.2274 |
| 195 | M268T17  | 4.553072 | 2.18684  | 3.477963 | 0.02143  | 0.35448  | UP   | 268.1589 | 268.1544 |
| 196 | M412T44  | 2.477313 | 1.308776 | 3.46261  | 0.021742 | 0.354493 | UP   | 412.2505 | 412.2502 |
| 197 | M550T30  | 65.733   | 6.038546 | 3.648767 | 0.021777 | 0.354494 | UP   | 550.091  | 550.0899 |
| 198 | M656T20_ | 56.02479 | 5.807994 | 3.645837 | 0.02183  | 0.354497 | UP   | 656.3223 | 656.322  |
| 199 | M569T29_ | 11.85343 | 3.567232 | 3.519    | 0.021917 | 0.3545   | UP   | 569.1136 | 569.1134 |
| 200 | M209T14  | 11.84849 | 3.566631 | 3.62849  | 0.021917 | 0.3545   | UP   | 209.1173 | 209.1172 |
| 201 | M476T23_ | 222.8253 | 7.79977  | 3.638834 | 0.021986 | 0.354503 | UP   | 476.2642 | 476.2635 |
| 202 | M265T19  | 16.08315 | 4.007478 | 3.62411  | 0.022038 | 0.354505 | UP   | 265.1436 | 265.1436 |
| 203 | M401T44  | 2.741542 | -1.45499 | -3.52563 | 0.022105 | 0.354507 | DOWN | 401.214  | 401.2136 |
| 204 | M467T24_ | 44.2359  | 5.467146 | 3.63214  | 0.022107 | 0.354508 | UP   | 467.1731 | 467.173  |
| 205 | M656T20_ | 76.02347 | 6.248373 | 3.629031 | 0.022151 | 0.354509 | UP   | 656.3222 | 656.3222 |
| 206 | M469T25_ | 23.47233 | 4.552889 | 3.62728  | 0.022161 | 0.35451  | UP   | 469.1887 | 469.1886 |
| 207 | M491T26_ | 240.6484 | 7.910783 | 3.628373 | 0.02219  | 0.354511 | UP   | 491.0817 | 491.0817 |
| 208 | M303T24_ | 17.79491 | 4.153392 | 3.572602 | 0.022242 | 0.354513 | UP   | 303.1046 | 303.1043 |
| 209 | M724T33  | 2.380749 | 1.251415 | 2.861048 | 0.022282 | 0.354514 | UP   | 723.5093 | 723.5079 |
| 210 | M349T27_ | 34.15196 | 5.093896 | 3.619286 | 0.022297 | 0.354515 | UP   | 349.2379 | 349.2376 |
| 211 | M348T23_ | 53.16096 | 5.732295 | 3.611708 | 0.022298 | 0.354515 | UP   | 348.1285 | 348.1281 |
| 212 | M451T31_ | 20.65378 | 4.368334 | 3.606941 | 0.022363 | 0.354517 | UP   | 451.1779 | 451.1776 |
| 213 | M223T25_ | 1.589301 | -0.66839 | -2.97861 | 0.022366 | 0.354517 | DOWN | 223.0637 | 223.0633 |
| 214 | M348T30  | 170.2478 | 7.411492 | 3.618185 | 0.022389 | 0.354518 | UP   | 348.1343 | 348.1339 |
| 215 | M640T22  | 625.0363 | 9.287796 | 3.612715 | 0.022502 | 0.354523 | UP   | 640.3275 | 640.3268 |
| 216 | M305T22_ | 5.973233 | -2.57851 | -3.44399 | 0.022558 | 0.354525 | DOWN | 305.1018 | 305.101  |
| 217 | M301T31_ | 50.51921 | 5.65876  | 3.60585  | 0.022558 | 0.354525 | UP   | 301.2166 | 301.2165 |
| 218 | M452T24  | 599.1149 | 9.226689 | 3.608144 | 0.022593 | 0.354526 | UP   | 452.1451 | 452.145  |
| 219 | M377T31_ | 160.3606 | 7.325176 | 3.603213 | 0.022669 | 0.354529 | UP   | 377.1423 | 377.1421 |
| 220 | M532T31_ | 80.93656 | 6.33872  | 3.60218  | 0.022696 | 0.35453  | UP   | 532.1084 | 532.1081 |
| 221 | M626T19  | 20.70346 | 4.3718   | 3.591391 | 0.022711 | 0.35453  | UP   | 626.3115 | 626.3115 |
| 222 | M432T31_ | 1.752272 | -0.80923 | -3.13138 | 0.022822 | 0.354534 | DOWN | 432.2746 | 432.2741 |
| 223 | M361T28_ | 52.44832 | 5.712825 | 3.596368 | 0.022825 | 0.354535 | UP   | 361.2013 | 361.2012 |
| 224 | M639T31  | 373.8154 | 8.546182 | 3.594704 | 0.022864 | 0.354536 | UP   | 639.0131 | 639.0126 |
| 225 | M814T33  | 2.924884 | 1.548379 | 2.844969 | 0.022884 | 0.354537 | UP   | 813.5677 | 813.5666 |
| 226 | M511T24  | 131.3186 | 7.036928 | 3.592564 | 0.022907 | 0.354538 | UP   | 511.2839 | 511.2838 |
| 227 | M527T21_ | 143.8717 | 7.16864  | 3.590075 | 0.022958 | 0.354539 | UP   | 527.2792 | 527.2789 |
| 228 | M1150T44 | 8.375199 | 3.066123 | 3.36339  | 0.023239 | 0.354549 | UP   | 1149.803 | 1149.802 |
| 229 | M220T2   | 3.683601 | -1.88112 | -3.47499 | 0.023243 | 0.35455  | DOWN | 219.8974 | 219.8972 |
| 230 | M405T27  | 62.96604 | 5.976502 | 3.56231  | 0.023488 | 0.354558 | UP   | 405.1364 | 405.1361 |
| 231 | M517T31  | 514.2807 | 9.006412 | 3.563891 | 0.023504 | 0.354559 | UP   | 517.0815 | 517.081  |
| 232 | M363T26_ | 48.47779 | 5.599252 | 3.560697 | 0.023559 | 0.35456  | UP   | 363.1258 | 363.1255 |
| 233 | M592T33  | 4.37199  | 2.12829  | 3.083684 | 0.023579 | 0.354561 | UP   | 592.4331 | 592.4317 |
| 234 | M349T32_ | 24.59689 | 4.620404 | 3.557539 | 0.023588 | 0.354561 | UP   | 349.2377 | 349.2374 |

|     |          |          |          |          |          |          |      |          |          |
|-----|----------|----------|----------|----------|----------|----------|------|----------|----------|
| 235 | M319T31_ | 1795.713 | 10.81034 | 3.558026 | 0.023628 | 0.354563 | UP   | 319.2271 | 319.227  |
| 236 | M641T22_ | 152.5399 | 7.253043 | 3.55725  | 0.023634 | 0.354563 | UP   | 641.3308 | 641.3303 |
| 237 | M628T31  | 14.9205  | -3.89922 | -3.471   | 0.023706 | 0.354565 | DOWN | 628.2369 | 628.2366 |
| 238 | M246T33  | 2.175354 | -1.12125 | -3.17856 | 0.023716 | 0.354566 | DOWN | 246.1853 | 246.185  |
| 239 | M728T43  | 2.932135 | 1.551951 | 2.790325 | 0.023721 | 0.354566 | UP   | 727.501  | 727.5007 |
| 240 | M155T3   | 2.931888 | 1.55183  | 3.519759 | 0.023813 | 0.354569 | UP   | 155.0028 | 155.0027 |
| 241 | M638T21  | 36.84771 | 5.203503 | 3.542437 | 0.023886 | 0.354572 | UP   | 638.3122 | 638.3121 |
| 242 | M576T26_ | 8.058807 | -3.01057 | -3.33532 | 0.023907 | 0.354572 | DOWN | 576.2274 | 576.2268 |
| 243 | M319T32_ | 185.8825 | 7.538247 | 3.536981 | 0.024078 | 0.354578 | UP   | 319.2272 | 319.2271 |
| 244 | M440T32_ | 4.093644 | -2.03339 | -3.42347 | 0.024117 | 0.354579 | DOWN | 440.2676 | 440.267  |
| 245 | M497T27_ | 42.47682 | 5.408604 | 3.529874 | 0.024123 | 0.354579 | UP   | 497.1474 | 497.1468 |
| 246 | M493T30  | 164.3924 | 7.361    | 3.532918 | 0.024164 | 0.354581 | UP   | 493.0609 | 493.0605 |
| 247 | M626T27  | 3.563835 | -1.83343 | -3.14924 | 0.024243 | 0.354583 | DOWN | 626.2762 | 626.2762 |
| 248 | M569T25  | 390.9986 | 8.611019 | 3.525822 | 0.02432  | 0.354586 | UP   | 569.1138 | 569.1137 |
| 249 | M532T31_ | 118.12   | 6.884109 | 3.522465 | 0.024386 | 0.354588 | UP   | 532.0851 | 532.0848 |
| 250 | M614T31  | 10.54445 | 3.398412 | 3.412516 | 0.024437 | 0.354589 | UP   | 614.4846 | 614.4845 |
| 251 | M533T33  | 110.7347 | 6.790964 | 3.519875 | 0.02444  | 0.35459  | UP   | 533.0824 | 533.0824 |
| 252 | M302T31_ | 48.50211 | 5.599976 | 3.518949 | 0.024456 | 0.35459  | UP   | 302.2199 | 302.2114 |
| 253 | M763T29  | 6.070484 | -2.60181 | -3.20684 | 0.024458 | 0.35459  | DOWN | 763.177  | 763.1768 |
| 254 | M656T20_ | 35.73218 | 5.159152 | 3.514141 | 0.024458 | 0.35459  | UP   | 656.3226 | 656.3224 |
| 255 | M395T44_ | 4.389409 | 2.134027 | 2.887917 | 0.024537 | 0.354593 | UP   | 395.493  | 395.4928 |
| 256 | M999T44_ | 3.130202 | 1.646256 | 2.760749 | 0.024646 | 0.354596 | UP   | 998.5067 | 998.5057 |
| 257 | M799T31_ | 105.4766 | 6.720779 | 3.509921 | 0.024661 | 0.354597 | UP   | 799.2638 | 799.2629 |
| 258 | M160T3   | 3.466861 | 1.79363  | 3.480136 | 0.024664 | 0.354597 | UP   | 159.9456 | 159.9455 |
| 259 | M371T31_ | 28.20785 | 4.818025 | 3.507754 | 0.024711 | 0.354598 | UP   | 371.1512 | 371.151  |
| 260 | M489T42  | 1.631205 | -0.70594 | -3.04151 | 0.024712 | 0.354598 | DOWN | 489.0841 | 489.0831 |
| 261 | M207T10_ | 5.076561 | 2.343852 | 3.035372 | 0.024731 | 0.354599 | UP   | 207.1018 | 207.1018 |
| 262 | M397T27  | 76.50198 | 6.257425 | 3.506974 | 0.024731 | 0.354599 | UP   | 397.2227 | 397.2223 |
| 263 | M495T31_ | 77.94491 | 6.284383 | 3.504549 | 0.024791 | 0.354601 | UP   | 495.0767 | 495.0762 |
| 264 | M605T24  | 15.33671 | 3.938917 | 3.35395  | 0.024832 | 0.354602 | UP   | 605.0666 | 605.0663 |
| 265 | M230T16  | 22.96425 | 4.521318 | 3.496608 | 0.024884 | 0.354603 | UP   | 230.147  | 230.147  |
| 266 | M320T31_ | 130.2647 | 7.025302 | 3.498695 | 0.024924 | 0.354605 | UP   | 320.2305 | 320.2304 |
| 267 | M576T25_ | 185.6477 | 7.536424 | 3.498313 | 0.024928 | 0.354605 | UP   | 576.0985 | 576.0979 |
| 268 | M607T31  | 14.13048 | -3.82074 | -3.44678 | 0.025006 | 0.354607 | DOWN | 607.2578 | 607.2573 |
| 269 | M556T20  | 1.637361 | -0.71137 | -2.74962 | 0.025086 | 0.35461  | DOWN | 556.3247 | 556.3243 |
| 270 | M492T27  | 64.36141 | 6.008124 | 3.488973 | 0.02513  | 0.354611 | UP   | 492.1684 | 492.168  |
| 271 | M317T30_ | 27.92235 | 4.803348 | 3.488846 | 0.02514  | 0.354611 | UP   | 317.2115 | 317.2082 |
| 272 | M391T24  | 51.87825 | 5.697058 | 3.47544  | 0.02545  | 0.35462  | UP   | 391.1568 | 391.1566 |
| 273 | M440T18  | 29.48577 | 4.881947 | 3.470344 | 0.025464 | 0.354621 | UP   | 440.247  | 440.2469 |
| 274 | M498T25  | 124.4083 | 6.958939 | 3.475085 | 0.025465 | 0.354621 | UP   | 498.1505 | 498.1504 |
| 275 | M430T25_ | 18.37721 | 4.199846 | 3.471625 | 0.025516 | 0.354622 | UP   | 430.1679 | 430.1678 |
| 276 | M449T27_ | 200.1261 | 7.644765 | 3.471303 | 0.025548 | 0.354623 | UP   | 449.1263 | 449.126  |
| 277 | M748T40  | 1.950545 | -0.96388 | -3.22983 | 0.025558 | 0.354624 | DOWN | 748.4851 | 748.4835 |
| 278 | M304T22_ | 16.424   | -4.03773 | -3.43884 | 0.025569 | 0.354624 | DOWN | 304.108  | 304.1074 |
| 279 | M627T20  | 42.92459 | 5.423733 | 3.466723 | 0.025624 | 0.354626 | UP   | 627.3154 | 627.3148 |
| 280 | M379T30_ | 28.14383 | 4.814747 | 3.46397  | 0.025654 | 0.354626 | UP   | 379.2119 | 379.2116 |
| 281 | M715T24  | 109.659  | 6.776881 | 3.465111 | 0.025673 | 0.354627 | UP   | 715.0082 | 715.0079 |

|     |          |          |          |          |          |          |      |          |          |
|-----|----------|----------|----------|----------|----------|----------|------|----------|----------|
| 282 | M873T43  | 1.749206 | 0.8067   | 3.156811 | 0.025683 | 0.354627 | UP   | 872.6321 | 872.6314 |
| 283 | M259T2   | 7.695102 | 2.943941 | 3.452691 | 0.025725 | 0.354628 | UP   | 258.8858 | 258.8855 |
| 284 | M370T33  | 3.718298 | 1.894643 | 2.974523 | 0.025746 | 0.354629 | UP   | 370.2955 | 370.2951 |
| 285 | M558T31_ | 93.45641 | 6.546222 | 3.459533 | 0.025811 | 0.354631 | UP   | 558.1082 | 558.1077 |
| 286 | M285T17  | 4.893388 | 2.290834 | 3.420878 | 0.025836 | 0.354632 | UP   | 285.1701 | 285.1699 |
| 287 | M309T11_ | 5.313099 | 2.409553 | 3.058709 | 0.026034 | 0.354637 | UP   | 309.0902 | 309.0898 |
| 288 | M414T30_ | 1.987641 | -0.99106 | -2.97097 | 0.026036 | 0.354637 | DOWN | 414.2284 | 414.2273 |
| 289 | M379T19_ | 3.133637 | 1.647838 | 2.729061 | 0.02606  | 0.354638 | UP   | 379.1207 | 379.1203 |
| 290 | M637T24  | 7.116078 | 2.831082 | 2.95093  | 0.026076 | 0.354638 | UP   | 637.1149 | 637.1147 |
| 291 | M478T23_ | 28.55483 | 4.835663 | 3.447733 | 0.026107 | 0.354639 | UP   | 478.2954 | 478.2953 |
| 292 | M264T2   | 375.9763 | 8.554498 | 3.44678  | 0.026131 | 0.35464  | UP   | 263.8649 | 263.8648 |
| 293 | M238T25_ | 657.5409 | 9.360937 | 3.446161 | 0.026146 | 0.35464  | UP   | 237.5825 | 237.5824 |
| 294 | M227T14_ | 11.22483 | 3.488622 | 3.429654 | 0.02615  | 0.35464  | UP   | 227.1279 | 227.1278 |
| 295 | M322T14_ | 33.99788 | 5.087373 | 3.439936 | 0.026179 | 0.354641 | UP   | 322.074  | 322.074  |
| 296 | M786T29  | 6.358521 | -2.66869 | -3.16808 | 0.026188 | 0.354641 | DOWN | 786.1742 | 786.174  |
| 297 | M154T29_ | 5.530681 | -2.46746 | -3.40276 | 0.026217 | 0.354642 | DOWN | 153.9483 | 153.9483 |
| 298 | M275T30  | 48.33722 | 5.595063 | 3.440429 | 0.026228 | 0.354643 | UP   | 275.2009 | 275.2006 |
| 299 | M597T24_ | 782.9235 | 9.612727 | 3.44265  | 0.02623  | 0.354643 | UP   | 597.0723 | 597.0722 |
| 300 | M405T24  | 7.54791  | 2.916077 | 3.412634 | 0.026269 | 0.354644 | UP   | 405.1566 | 405.1564 |
| 301 | M375T33_ | 366.7602 | 8.518693 | 3.437867 | 0.026345 | 0.354646 | UP   | 375.1621 | 375.1619 |
| 302 | M375T30  | 9.724328 | 3.281599 | 3.387458 | 0.026352 | 0.354646 | UP   | 375.1622 | 375.1619 |
| 303 | M519T32_ | 48.49682 | 5.599818 | 3.437189 | 0.026356 | 0.354646 | UP   | 519.0768 | 519.0766 |
| 304 | M399T11_ | 6.973962 | 2.801978 | 3.109955 | 0.02638  | 0.354647 | UP   | 398.9468 | 398.9465 |
| 305 | M319T32_ | 381.0954 | 8.574008 | 3.436173 | 0.026386 | 0.354647 | UP   | 319.2271 | 319.2268 |
| 306 | M415T24_ | 3.683377 | 1.881029 | 2.944451 | 0.026407 | 0.354647 | UP   | 415.0475 | 415.0473 |
| 307 | M453T24_ | 52.31268 | 5.709089 | 3.429795 | 0.026457 | 0.354649 | UP   | 453.142  | 453.1418 |
| 308 | M579T25  | 71.1922  | 6.153647 | 3.431901 | 0.02646  | 0.354649 | UP   | 579.0618 | 579.0613 |
| 309 | M626T20  | 40.03143 | 5.323061 | 3.428305 | 0.026509 | 0.35465  | UP   | 626.3118 | 626.3114 |
| 310 | M579T26  | 60.00595 | 5.907034 | 3.427313 | 0.026556 | 0.354652 | UP   | 579.0619 | 579.0614 |
| 311 | M1003T44 | 4.145984 | 2.051714 | 2.745649 | 0.026616 | 0.354653 | UP   | 1003.498 | 1003.496 |
| 312 | M333T37_ | 66.49742 | 6.055226 | 3.42133  | 0.026748 | 0.354657 | UP   | 333.4074 | 333.402  |
| 313 | M469T25_ | 16.98754 | 4.086405 | 3.404699 | 0.026778 | 0.354657 | UP   | 469.1887 | 469.1882 |
| 314 | M565T29_ | 52.05337 | 5.70192  | 3.419231 | 0.026799 | 0.354658 | UP   | 564.9909 | 564.9906 |
| 315 | M373T32_ | 117.9022 | 6.881447 | 3.417577 | 0.026802 | 0.354658 | UP   | 373.1465 | 373.1463 |
| 316 | M699T31  | 198.6076 | 7.633777 | 3.416742 | 0.026851 | 0.354659 | UP   | 699.339  | 699.3383 |
| 317 | M439T24  | 15.45778 | 3.950261 | 3.340377 | 0.026884 | 0.35466  | UP   | 439.1419 | 439.1417 |
| 318 | M498T26  | 32.62105 | 5.027731 | 3.409288 | 0.026906 | 0.354661 | UP   | 498.2133 | 498.2127 |
| 319 | M667T30  | 24.187   | 4.59616  | 3.403386 | 0.026931 | 0.354662 | UP   | 667.0222 | 667.0222 |
| 320 | M638T20  | 27.96771 | 4.80569  | 3.408533 | 0.02695  | 0.354662 | UP   | 638.3118 | 638.3117 |
| 321 | M612T10_ | 344.3265 | 8.427633 | 3.412664 | 0.02696  | 0.354662 | UP   | 612.3764 | 612.3763 |
| 322 | M597T27_ | 93.33495 | 6.544345 | 3.41013  | 0.027012 | 0.354664 | UP   | 597.0726 | 597.0719 |
| 323 | M348T23_ | 472.4167 | 8.883916 | 3.40972  | 0.027034 | 0.354664 | UP   | 347.6267 | 347.6264 |
| 324 | M365T20_ | 103.5346 | 6.693969 | 3.408454 | 0.027062 | 0.354665 | UP   | 365.2328 | 365.2327 |
| 325 | M349T30_ | 521.3304 | 9.026054 | 3.405632 | 0.027136 | 0.354667 | UP   | 349.2378 | 349.2375 |
| 326 | M600T24_ | 30.65597 | 4.938096 | 3.399195 | 0.027188 | 0.354668 | UP   | 600.0761 | 600.076  |
| 327 | M154T30  | 5.275921 | -2.39942 | -3.34738 | 0.027244 | 0.35467  | DOWN | 153.9483 | 153.9482 |
| 328 | M595T24  | 76.82007 | 6.263411 | 3.398786 | 0.027279 | 0.354671 | UP   | 595.0773 | 595.0769 |

|     |          |          |          |          |          |          |      |          |          |
|-----|----------|----------|----------|----------|----------|----------|------|----------|----------|
| 329 | M382T23_ | 12.18712 | 3.607286 | 3.368449 | 0.027296 | 0.354671 | UP   | 382.231  | 382.231  |
| 330 | M553T36_ | 10.27687 | -3.36133 | -3.38247 | 0.027394 | 0.354673 | DOWN | 553.3339 | 553.3337 |
| 331 | M527T20_ | 169.5222 | 7.405331 | 3.393216 | 0.027448 | 0.354675 | UP   | 527.2792 | 527.2791 |
| 332 | M277T10_ | 6.286795 | 2.652325 | 3.078751 | 0.027469 | 0.354675 | UP   | 277.1143 | 277.1141 |
| 333 | M454T22_ | 5.941601 | -2.57085 | -3.31516 | 0.027489 | 0.354676 | DOWN | 454.2627 | 454.2626 |
| 334 | M1206T44 | 9.012924 | 3.171995 | 3.084381 | 0.027559 | 0.354678 | UP   | 1205.739 | 1205.736 |
| 335 | M423T26  | 28.81093 | 4.848544 | 3.373593 | 0.027625 | 0.354679 | UP   | 423.0555 | 423.0552 |
| 336 | M434T22  | 2.079696 | -1.05637 | -2.77602 | 0.027626 | 0.354679 | DOWN | 434.3348 | 434.3342 |
| 337 | M519T31_ | 375.3685 | 8.552164 | 3.383594 | 0.027693 | 0.354681 | UP   | 519.0768 | 519.0764 |
| 338 | M474T11  | 9.799121 | -3.29265 | -3.30994 | 0.027716 | 0.354682 | DOWN | 474.1351 | 474.1349 |
| 339 | M377T33  | 32.57392 | 5.025645 | 3.380531 | 0.02773  | 0.354682 | UP   | 377.1625 | 377.1623 |
| 340 | M154T25_ | 6.325899 | -2.66127 | -3.3447  | 0.027781 | 0.354683 | DOWN | 153.9483 | 153.9483 |
| 341 | M451T27_ | 181.2452 | 7.501799 | 3.379584 | 0.027794 | 0.354683 | UP   | 451.1421 | 451.1415 |
| 342 | M479T23_ | 58.93995 | 5.881174 | 3.379143 | 0.027803 | 0.354684 | UP   | 479.2988 | 479.2986 |
| 343 | M494T30  | 14.40503 | 3.848501 | 3.257416 | 0.027878 | 0.354685 | UP   | 494.0641 | 494.0641 |
| 344 | M509T28  | 23.53318 | 4.556625 | 3.349219 | 0.027928 | 0.354687 | UP   | 509.0556 | 509.0552 |
| 345 | M567T24  | 208.8486 | 7.706314 | 3.370037 | 0.028039 | 0.354689 | UP   | 567.0979 | 567.0978 |
| 346 | M655T34  | 23.49794 | 4.554462 | 3.364723 | 0.028046 | 0.35469  | UP   | 655.4994 | 655.4985 |
| 347 | M527T20_ | 124.9219 | 6.964882 | 3.367675 | 0.028093 | 0.354691 | UP   | 527.2789 | 527.2788 |
| 348 | M497T18  | 80.75988 | 6.335567 | 3.366838 | 0.02812  | 0.354691 | UP   | 497.2684 | 497.2682 |
| 349 | M502T33  | 6.12175  | 2.613944 | 3.182693 | 0.028158 | 0.354692 | UP   | 502.3739 | 502.3728 |
| 350 | M694T22  | 212.8182 | 7.733478 | 3.363313 | 0.028209 | 0.354693 | UP   | 694.2471 | 694.2466 |
| 351 | M375T32_ | 53.37697 | 5.738145 | 3.362517 | 0.028217 | 0.354694 | UP   | 375.1468 | 375.1468 |
| 352 | M474T26  | 25.23281 | 4.657229 | 3.338026 | 0.028455 | 0.354699 | UP   | 474.1578 | 474.1573 |
| 353 | M464T26  | 14.7018  | 3.877921 | 3.338526 | 0.028571 | 0.354702 | UP   | 464.0823 | 464.082  |
| 354 | M301T37  | 150.0216 | 7.229026 | 3.348445 | 0.02861  | 0.354703 | UP   | 301.2163 | 301.2162 |
| 355 | M394T21  | 28.19712 | 4.817476 | 3.337675 | 0.028652 | 0.354704 | UP   | 394.2956 | 394.2954 |
| 356 | M694T23  | 252.5556 | 7.980457 | 3.344326 | 0.028716 | 0.354705 | UP   | 694.2467 | 694.2465 |
| 357 | M223T25_ | 18.94024 | 4.243383 | 3.331632 | 0.028721 | 0.354706 | UP   | 223.1695 | 223.1694 |
| 358 | M164T3   | 6.503466 | 2.701209 | 3.28684  | 0.028744 | 0.354706 | UP   | 163.9767 | 163.9766 |
| 359 | M394T30_ | 2.204544 | -1.14048 | -2.76328 | 0.028766 | 0.354707 | DOWN | 394.2041 | 394.2038 |
| 360 | M493T27_ | 73.26129 | 6.194979 | 3.339742 | 0.02883  | 0.354708 | UP   | 493.0974 | 493.0972 |
| 361 | M365T20_ | 115.3214 | 6.849516 | 3.33868  | 0.028869 | 0.354709 | UP   | 365.2326 | 365.2326 |
| 362 | M468T21  | 3.087027 | -1.62622 | -3.20046 | 0.028956 | 0.354711 | DOWN | 468.1535 | 468.1529 |
| 363 | M409T24_ | 15.22019 | 3.927915 | 3.333468 | 0.029011 | 0.354712 | UP   | 409.1676 | 409.1671 |
| 364 | M321T24_ | 7.929639 | 2.987255 | 3.270915 | 0.029013 | 0.354712 | UP   | 321.0787 | 321.0786 |
| 365 | M387T10_ | 7.335681 | 2.874931 | 3.079043 | 0.029051 | 0.354713 | UP   | 387.2227 | 387.2146 |
| 366 | M319T31_ | 48.44693 | 5.598333 | 3.329674 | 0.02911  | 0.354714 | UP   | 319.2271 | 319.2269 |
| 367 | M561T31  | 65.5701  | 6.034966 | 3.32599  | 0.029127 | 0.354715 | UP   | 561.1068 | 561.1064 |
| 368 | M223T30_ | 84.09227 | 6.393901 | 3.324276 | 0.029159 | 0.354715 | UP   | 222.5954 | 222.5952 |
| 369 | M381T22  | 31.91176 | 4.996016 | 3.324199 | 0.029257 | 0.354718 | UP   | 381.2276 | 381.2274 |
| 370 | M640T23  | 1058.475 | 10.04777 | 3.322594 | 0.029307 | 0.354719 | UP   | 640.3272 | 640.3269 |
| 371 | M596T31_ | 4.916275 | -2.29757 | -3.1738  | 0.029313 | 0.354719 | DOWN | 596.2265 | 596.226  |
| 372 | M528T20  | 14.27722 | 3.835644 | 3.298798 | 0.029347 | 0.35472  | UP   | 528.2825 | 528.2822 |
| 373 | M494T27_ | 92.25984 | 6.527631 | 3.318191 | 0.029414 | 0.354721 | UP   | 494.1687 | 494.1683 |
| 374 | M786T44  | 6.988212 | 2.804923 | 2.995364 | 0.029418 | 0.354721 | UP   | 786.2715 | 786.2711 |
| 375 | M476T24_ | 42.10323 | 5.395859 | 3.311796 | 0.029559 | 0.354724 | UP   | 476.2799 | 476.2797 |



|     |          |          |          |          |          |          |      |          |          |
|-----|----------|----------|----------|----------|----------|----------|------|----------|----------|
| 376 | M479T24  | 30.04309 | 4.908961 | 3.308924 | 0.029607 | 0.354725 | UP   | 479.2988 | 479.2985 |
| 377 | M333T38  | 1632.988 | 10.6733  | 3.308165 | 0.029705 | 0.354727 | UP   | 333.2426 | 333.2425 |
| 378 | M408T21_ | 2.884372 | -1.52826 | -2.89458 | 0.029754 | 0.354728 | DOWN | 408.1227 | 408.1226 |
| 379 | M449T24_ | 12.71602 | 3.668575 | 3.146064 | 0.029788 | 0.354729 | UP   | 449.1465 | 449.1461 |
| 380 | M547T30  | 62.37359 | 5.962863 | 3.302504 | 0.029807 | 0.35473  | UP   | 547.0917 | 547.0915 |
| 381 | M393T27_ | 7.066345 | 2.820964 | 3.269871 | 0.029857 | 0.354731 | UP   | 393.1728 | 393.1728 |
| 382 | M507T42  | 3.171727 | -1.66527 | -3.0683  | 0.030066 | 0.354735 | DOWN | 507.0543 | 507.054  |
| 383 | M297T25  | 1.61273  | -0.68951 | -3.18903 | 0.03008  | 0.354735 | DOWN | 297.0826 | 297.0821 |
| 384 | M521T33  | 1198.8   | 10.22738 | 3.29324  | 0.030124 | 0.354736 | UP   | 521.0923 | 521.0919 |
| 385 | M301T38_ | 29.47515 | 4.881427 | 3.291974 | 0.030137 | 0.354737 | UP   | 301.2164 | 301.2162 |
| 386 | M493T27_ | 57.17481 | 5.837308 | 3.289738 | 0.030168 | 0.354737 | UP   | 493.0975 | 493.0972 |
| 387 | M535T30  | 23.06141 | 4.527409 | 3.279627 | 0.030272 | 0.354739 | UP   | 535.0912 | 535.0902 |
| 388 | M513T17  | 8.391154 | 3.068869 | 3.224479 | 0.030273 | 0.354739 | UP   | 513.2632 | 513.2631 |
| 389 | M351T27  | 43.74557 | 5.451065 | 3.284807 | 0.03035  | 0.354741 | UP   | 351.217  | 351.2168 |
| 390 | M511T22_ | 86.17845 | 6.429255 | 3.283423 | 0.030395 | 0.354742 | UP   | 511.2841 | 511.284  |
| 391 | M167T30  | 3.153525 | -1.65697 | -3.04741 | 0.030433 | 0.354743 | DOWN | 167.0338 | 167.0336 |
| 392 | M321T27_ | 32.21367 | 5.009601 | 3.27996  | 0.030451 | 0.354743 | UP   | 321.1152 | 321.1149 |
| 393 | M598T27  | 53.78917 | 5.749244 | 3.272565 | 0.030549 | 0.354745 | UP   | 598.076  | 598.0754 |
| 394 | M768T33  | 2.30774  | 1.206481 | 2.83393  | 0.030571 | 0.354746 | UP   | 767.5357 | 767.5341 |
| 395 | M215T22  | 4.874477 | -2.28525 | -3.0392  | 0.030586 | 0.354746 | DOWN | 215.0068 | 215.0065 |
| 396 | M347T29  | 70.69248 | 6.143485 | 3.276202 | 0.030605 | 0.354746 | UP   | 347.2221 | 347.2219 |
| 397 | M493T26_ | 42.42335 | 5.406787 | 3.269908 | 0.030675 | 0.354748 | UP   | 493.0822 | 493.0819 |
| 398 | M313T20  | 1.799344 | -0.84747 | -2.89679 | 0.030749 | 0.354749 | DOWN | 313.0736 | 313.0735 |
| 399 | M767T33  | 2.284802 | 1.192069 | 2.802275 | 0.030751 | 0.354749 | UP   | 766.5323 | 766.5307 |
| 400 | M399T20  | 21.78922 | 4.445542 | 3.266426 | 0.030762 | 0.354749 | UP   | 399.2382 | 399.2381 |
| 401 | M213T22_ | 5.025171 | -2.32917 | -3.09289 | 0.030764 | 0.354749 | DOWN | 213.0101 | 213.0096 |
| 402 | M195T37_ | 291.421  | 8.186961 | 3.269438 | 0.030804 | 0.35475  | UP   | 194.5861 | 194.586  |
| 403 | M202T30  | 18.08287 | 4.176552 | 3.261882 | 0.030853 | 0.354751 | UP   | 202.082  | 202.0818 |
| 404 | M230T23_ | 213.4786 | 7.737948 | 3.267133 | 0.03087  | 0.354752 | UP   | 229.585  | 229.585  |
| 405 | M468T38  | 1.488091 | -0.57346 | -2.6263  | 0.030895 | 0.354752 | DOWN | 468.1057 | 468.1052 |
| 406 | M598T24  | 307.2062 | 8.263064 | 3.263816 | 0.030967 | 0.354754 | UP   | 598.0756 | 598.0754 |
| 407 | M529T21  | 15.10502 | 3.916956 | 3.237129 | 0.030994 | 0.354754 | UP   | 529.2949 | 529.2944 |
| 408 | M378T31_ | 88.15426 | 6.461958 | 3.261061 | 0.031025 | 0.354755 | UP   | 378.1459 | 378.1456 |
| 409 | M363T11_ | 6.072095 | 2.602194 | 2.934665 | 0.031061 | 0.354755 | UP   | 363.23   | 363.2276 |
| 410 | M381T21_ | 21.14322 | 4.402123 | 3.256033 | 0.031096 | 0.354756 | UP   | 381.2278 | 381.2274 |
| 411 | M318T31_ | 488.8667 | 8.933297 | 3.257558 | 0.031152 | 0.354757 | UP   | 317.5783 | 317.5781 |
| 412 | M151T31_ | 9.306655 | 3.218263 | 3.246265 | 0.03122  | 0.354759 | UP   | 151.1118 | 151.1117 |
| 413 | M498T18_ | 8.228778 | 3.040678 | 3.229732 | 0.03125  | 0.354759 | UP   | 498.2718 | 498.2716 |
| 414 | M471T31  | 26.65544 | -4.73636 | -3.25031 | 0.031252 | 0.354759 | DOWN | 471.1648 | 471.1647 |
| 415 | M363T20  | 16.17841 | 4.015998 | 3.243689 | 0.031256 | 0.354759 | UP   | 363.2171 | 363.217  |
| 416 | M351T31_ | 437.5781 | 8.773397 | 3.2523   | 0.031307 | 0.35476  | UP   | 351.2532 | 351.253  |
| 417 | M302T37  | 33.53762 | 5.067708 | 3.25119  | 0.031337 | 0.354761 | UP   | 302.2197 | 302.2197 |
| 418 | M481T24  | 43.71602 | 5.45009  | 3.249226 | 0.031371 | 0.354761 | UP   | 481.1521 | 481.1518 |
| 419 | M177T14  | 3.694005 | 1.885186 | 3.16567  | 0.031449 | 0.354763 | UP   | 177.0911 | 177.0911 |
| 420 | M299T11_ | 213.3478 | 7.737063 | 3.246338 | 0.031479 | 0.354764 | UP   | 299.0218 | 299.0215 |
| 421 | M248T18  | 5.241371 | -2.38994 | -3.02161 | 0.031537 | 0.354765 | DOWN | 248.0626 | 248.0621 |
| 422 | M725T33  | 2.281715 | 1.190119 | 2.671176 | 0.031638 | 0.354767 | UP   | 724.5123 | 724.5107 |

|     |          |          |          |          |          |          |      |          |          |
|-----|----------|----------|----------|----------|----------|----------|------|----------|----------|
| 423 | M511T23_ | 258.0496 | 8.011505 | 3.240967 | 0.031643 | 0.354767 | UP   | 511.2837 | 511.2836 |
| 424 | M375T33_ | 174.0112 | 7.443037 | 3.239739 | 0.031681 | 0.354767 | UP   | 375.162  | 375.1619 |
| 425 | M244T43  | 1.197758 | -0.26034 | -2.61015 | 0.031764 | 0.354769 | DOWN | 244.1903 | 244.1902 |
| 426 | M626T31  | 39.69514 | -5.31089 | -3.23202 | 0.03178  | 0.354769 | DOWN | 626.24   | 626.2395 |
| 427 | M420T44_ | 2.074178 | 1.05254  | 2.68257  | 0.031883 | 0.354771 | UP   | 420.1808 | 420.1806 |
| 428 | M749T41_ | 1.983724 | -0.98821 | -3.06608 | 0.031938 | 0.354772 | DOWN | 749.4886 | 749.4868 |
| 429 | M323T35_ | 28.97782 | 4.856877 | 3.230612 | 0.031943 | 0.354772 | UP   | 323.2583 | 323.2583 |
| 430 | M512T24  | 15.20258 | 3.926244 | 3.226156 | 0.03197  | 0.354773 | UP   | 512.2872 | 512.2872 |
| 431 | M641T23  | 111.1119 | 6.795869 | 3.229057 | 0.031989 | 0.354773 | UP   | 641.3305 | 641.3302 |
| 432 | M151T37  | 17.14489 | 4.099706 | 3.228758 | 0.031995 | 0.354773 | UP   | 151.1117 | 151.1117 |
| 433 | M474T25  | 31.81501 | 4.991636 | 3.22065  | 0.032    | 0.354773 | UP   | 474.1578 | 474.1572 |
| 434 | M503T31  | 71.60934 | 6.162076 | 3.227859 | 0.032035 | 0.354774 | UP   | 503.1042 | 503.1036 |
| 435 | M354T11  | 3.534191 | 1.82138  | 2.915207 | 0.032051 | 0.354774 | UP   | 354.2492 | 354.2491 |
| 436 | M321T33_ | 190.3457 | 7.572478 | 3.226225 | 0.032087 | 0.354775 | UP   | 321.2428 | 321.2427 |
| 437 | M313T24  | 20.86998 | 4.383357 | 3.194232 | 0.032132 | 0.354776 | UP   | 313.2938 | 313.2864 |
| 438 | M351T25_ | 175.993  | 7.459374 | 3.223998 | 0.032156 | 0.354776 | UP   | 351.2535 | 351.2534 |
| 439 | M393T34  | 110.516  | 6.788112 | 3.222259 | 0.032158 | 0.354776 | UP   | 393.0997 | 393.0997 |
| 440 | M762T29  | 5.160867 | -2.36761 | -3.02494 | 0.032222 | 0.354777 | DOWN | 762.1741 | 762.1737 |
| 441 | M384T27  | 19.64776 | 4.296293 | 3.204644 | 0.032226 | 0.354778 | UP   | 384.2749 | 384.2747 |
| 442 | M338T23  | 10.32421 | 3.367959 | 3.09865  | 0.032239 | 0.354778 | UP   | 338.1417 | 338.1415 |
| 443 | M398T20_ | 6.843192 | -2.77467 | -3.14488 | 0.032353 | 0.35478  | DOWN | 398.1305 | 398.1297 |
| 444 | M461T21  | 4.69555  | -2.23129 | -3.04954 | 0.032415 | 0.354781 | DOWN | 461.1776 | 461.1767 |
| 445 | M244T31  | 181.639  | 7.504931 | 3.214183 | 0.032454 | 0.354782 | UP   | 243.555  | 243.5549 |
| 446 | M431T40  | 1.641873 | 0.715343 | 2.58885  | 0.032615 | 0.354785 | UP   | 431.2092 | 431.209  |
| 447 | M1156T44 | 3.506009 | 1.80983  | 2.60447  | 0.032646 | 0.354785 | UP   | 1155.79  | 1155.79  |
| 448 | M955T41  | 6.627853 | 2.728542 | 2.867498 | 0.032692 | 0.354786 | UP   | 955.0919 | 955.0918 |
| 449 | M331T30_ | 26.58731 | 4.732666 | 3.206093 | 0.032706 | 0.354786 | UP   | 331.2272 | 331.227  |
| 450 | M405T44  | 2.854509 | -1.51324 | -3.14405 | 0.032873 | 0.354789 | DOWN | 405.2097 | 405.2092 |
| 451 | M493T27_ | 25.63912 | 4.680275 | 3.196178 | 0.032878 | 0.354789 | UP   | 493.1719 | 493.1715 |
| 452 | M870T44  | 13.02138 | -3.70281 | -3.14411 | 0.032888 | 0.354789 | DOWN | 869.5881 | 869.5877 |
| 453 | M333T37_ | 8337.534 | 13.0254  | 3.200295 | 0.032892 | 0.354789 | UP   | 333.2424 | 333.2423 |
| 454 | M574T33_ | 2.387674 | 1.255606 | 2.769046 | 0.032993 | 0.354791 | UP   | 574.4037 | 574.4026 |
| 455 | M224T27  | 157.0905 | 7.295452 | 3.195476 | 0.033036 | 0.354792 | UP   | 223.5851 | 223.5848 |
| 456 | M321T31_ | 22.07354 | 4.464246 | 3.189587 | 0.033067 | 0.354793 | UP   | 321.2338 | 321.2336 |
| 457 | M321T31_ | 118.1956 | 6.885032 | 3.193351 | 0.033083 | 0.354793 | UP   | 320.5551 | 320.5549 |
| 458 | M319T25  | 25.72128 | 4.684891 | 3.184751 | 0.033131 | 0.354794 | UP   | 319.2273 | 319.2273 |
| 459 | M334T37_ | 29.6222  | 4.888607 | 3.187986 | 0.033175 | 0.354794 | UP   | 334.0764 | 334.0696 |
| 460 | M539T44  | 7.008231 | 2.80905  | 2.947306 | 0.03318  | 0.354795 | UP   | 539.1502 | 539.1499 |
| 461 | M194T37  | 211.0381 | 7.72136  | 3.190971 | 0.033183 | 0.354795 | UP   | 194.0844 | 194.0844 |
| 462 | M442T19  | 24.81227 | 4.632982 | 3.185207 | 0.033203 | 0.354795 | UP   | 442.2624 | 442.2622 |
| 463 | M832T31  | 7.716321 | -2.94791 | -2.99934 | 0.033221 | 0.354795 | DOWN | 832.1098 | 832.1089 |
| 464 | M997T44_ | 6.641296 | 2.731465 | 2.88908  | 0.033227 | 0.354795 | UP   | 996.5073 | 996.5064 |
| 465 | M750T41_ | 2.413014 | -1.27084 | -2.84132 | 0.033277 | 0.354796 | DOWN | 750.4891 | 750.4888 |
| 466 | M321T26_ | 7.062539 | 2.820187 | 3.054245 | 0.0333   | 0.354797 | UP   | 321.2428 | 321.2427 |
| 467 | M412T27  | 36.65848 | 5.196075 | 3.18233  | 0.033426 | 0.354799 | UP   | 412.2335 | 412.2332 |
| 468 | M520T31  | 413.8619 | 8.693006 | 3.182938 | 0.03344  | 0.354799 | UP   | 520.0798 | 520.0798 |
| 469 | M257T36  | 15.52635 | 3.956646 | 3.18069  | 0.033463 | 0.354799 | UP   | 257.1901 | 257.19   |

|     |          |          |          |          |          |          |      |          |          |
|-----|----------|----------|----------|----------|----------|----------|------|----------|----------|
| 470 | M530T21  | 14.38331 | 3.846323 | 3.178494 | 0.033516 | 0.3548   | UP   | 530.2986 | 530.2981 |
| 471 | M277T31_ | 9.074402 | 3.181803 | 3.172231 | 0.033565 | 0.354801 | UP   | 277.2165 | 277.2163 |
| 472 | M640T24  | 158.4774 | 7.308133 | 3.177654 | 0.033609 | 0.354802 | UP   | 640.3273 | 640.3268 |
| 473 | M607T29  | 9.366732 | -3.22755 | -3.10325 | 0.03364  | 0.354802 | DOWN | 607.2564 | 607.2561 |
| 474 | M445T18_ | 3.530831 | -1.82001 | -2.8681  | 0.033643 | 0.354802 | DOWN | 445.0099 | 445.0097 |
| 475 | M177T2   | 14.52432 | 3.860399 | 3.124356 | 0.033672 | 0.354803 | UP   | 176.9844 | 176.9842 |
| 476 | M293T30  | 33.34201 | 5.059269 | 3.171161 | 0.033703 | 0.354803 | UP   | 293.2115 | 293.2112 |
| 477 | M612T31  | 14.28714 | -3.83665 | -3.14237 | 0.033726 | 0.354804 | DOWN | 612.2637 | 612.2634 |
| 478 | M454T24_ | 48.15481 | 5.589608 | 3.169895 | 0.033734 | 0.354804 | UP   | 454.1453 | 454.145  |
| 479 | M384T11  | 3.725973 | 1.897617 | 2.887556 | 0.033833 | 0.354806 | UP   | 384.296  | 384.2954 |
| 480 | M575T29_ | 5.092572 | 2.348395 | 2.758491 | 0.03402  | 0.354809 | UP   | 575.3126 | 575.3123 |
| 481 | M208T31_ | 404.7352 | 8.660835 | 3.164699 | 0.03403  | 0.354809 | UP   | 207.5901 | 207.59   |
| 482 | M411T30  | 7.422017 | 2.891811 | 2.971166 | 0.034199 | 0.354812 | UP   | 411.0731 | 411.0729 |
| 483 | M154T27  | 6.090751 | -2.60662 | -3.12977 | 0.034292 | 0.354813 | DOWN | 153.9483 | 153.9483 |
| 484 | M459T27  | 4.839785 | -2.27494 | -3.00872 | 0.034323 | 0.354814 | DOWN | 459.1616 | 459.1615 |
| 485 | M684T43  | 3.005334 | 1.587526 | 2.555307 | 0.034332 | 0.354814 | UP   | 683.976  | 683.9759 |
| 486 | M247T33  | 2.909036 | 1.540541 | 2.786565 | 0.034352 | 0.354814 | UP   | 247.2058 | 247.2057 |
| 487 | M195T39  | 1.679355 | -0.74791 | -2.68866 | 0.034366 | 0.354814 | DOWN | 195.0922 | 195.0921 |
| 488 | M321T33_ | 729.7421 | 9.511243 | 3.154434 | 0.034367 | 0.354814 | UP   | 321.2428 | 321.2426 |
| 489 | M363T25  | 40.81397 | 5.350991 | 3.153349 | 0.034374 | 0.354814 | UP   | 363.2171 | 363.2169 |
| 490 | M215T37  | 381.8151 | 8.57673  | 3.150018 | 0.034513 | 0.354817 | UP   | 214.5976 | 214.5976 |
| 491 | M996T44  | 6.932911 | 2.793461 | 2.89758  | 0.034552 | 0.354817 | UP   | 995.5036 | 995.5032 |
| 492 | M604T27_ | 12.21988 | -3.61116 | -3.09918 | 0.03477  | 0.354821 | DOWN | 604.2374 | 604.2371 |
| 493 | M423T29_ | 8.021634 | 3.003896 | 3.112418 | 0.034794 | 0.354821 | UP   | 423.1831 | 423.1829 |
| 494 | M379T33  | 7.111692 | 2.830193 | 3.122601 | 0.034822 | 0.354822 | UP   | 379.1579 | 379.1578 |
| 495 | M351T29_ | 90.87376 | 6.505792 | 3.14     | 0.034826 | 0.354822 | UP   | 351.2534 | 351.2532 |
| 496 | M322T33_ | 20.00285 | 4.322133 | 3.138322 | 0.034852 | 0.354822 | UP   | 322.2462 | 322.2459 |
| 497 | M360T25  | 18.93516 | 4.242995 | 3.107053 | 0.034931 | 0.354823 | UP   | 360.1262 | 360.1261 |
| 498 | M320T22_ | 98.52794 | 6.622461 | 3.136605 | 0.034938 | 0.354823 | UP   | 320.0949 | 320.0944 |
| 499 | M334T37_ | 56.43526 | 5.818525 | 3.135074 | 0.03501  | 0.354824 | UP   | 334.2458 | 334.2457 |
| 500 | M467T24_ | 44.55906 | 5.477647 | 3.131473 | 0.035061 | 0.354825 | UP   | 467.1729 | 467.1728 |
| 501 | M416T33_ | 58.05576 | 5.859367 | 3.132927 | 0.035064 | 0.354825 | UP   | 416.1887 | 416.1883 |
| 502 | M1444T44 | 9.684478 | 3.275674 | 2.988251 | 0.035077 | 0.354826 | UP   | 1443.97  | 1443.969 |
| 503 | M402T44  | 3.110764 | -1.63727 | -2.96267 | 0.035118 | 0.354826 | DOWN | 402.2172 | 402.2168 |
| 504 | M510T43_ | 1.264705 | 0.338801 | 2.581872 | 0.035199 | 0.354827 | UP   | 509.6984 | 509.6976 |
| 505 | M323T35_ | 145.7409 | 7.187262 | 3.128835 | 0.035222 | 0.354828 | UP   | 323.2584 | 323.2583 |
| 506 | M414T31  | 328.6812 | 8.360545 | 3.128687 | 0.035227 | 0.354828 | UP   | 414.1496 | 414.1494 |
| 507 | M335T37_ | 458.5612 | 8.84097  | 3.128102 | 0.035249 | 0.354828 | UP   | 335.0149 | 335.0148 |
| 508 | M394T34_ | 77.87666 | 6.283119 | 3.127116 | 0.035261 | 0.354828 | UP   | 394.1031 | 394.1031 |
| 509 | M513T24_ | 3.283489 | 1.71523  | 2.810545 | 0.03536  | 0.35483  | UP   | 513.2801 | 513.2798 |
| 510 | M525T23_ | 2.591424 | 1.373745 | 2.573021 | 0.035412 | 0.354831 | UP   | 525.0456 | 525.0453 |
| 511 | M386T29_ | 30.37908 | 4.925006 | 3.122339 | 0.035434 | 0.354831 | UP   | 386.2906 | 386.2903 |
| 512 | M485T34_ | 15.11571 | -3.91798 | -3.10421 | 0.035465 | 0.354831 | DOWN | 485.1803 | 485.1802 |
| 513 | M331T37_ | 1360.981 | 10.41043 | 3.121411 | 0.035478 | 0.354832 | UP   | 331.4838 | 331.4837 |
| 514 | M360T44  | 3.408644 | -1.7692  | -3.10523 | 0.035537 | 0.354833 | DOWN | 360.1876 | 360.187  |
| 515 | M491T44  | 1.359212 | 0.442771 | 2.68971  | 0.035565 | 0.354833 | UP   | 491.3737 | 491.373  |
| 516 | M529T33_ | 4.513834 | 2.174353 | 2.874095 | 0.035569 | 0.354833 | UP   | 529.3738 | 529.3731 |

|     |          |          |          |          |          |          |      |          |          |
|-----|----------|----------|----------|----------|----------|----------|------|----------|----------|
| 517 | M497T20_ | 108.0621 | 6.755716 | 3.116078 | 0.03566  | 0.354834 | UP   | 497.2684 | 497.2679 |
| 518 | M318T31_ | 4.399442 | 2.13732  | 2.522092 | 0.03572  | 0.354835 | UP   | 317.9076 | 317.9073 |
| 519 | M477T24  | 41.95189 | 5.390664 | 3.114025 | 0.035724 | 0.354835 | UP   | 477.2832 | 477.283  |
| 520 | M509T24  | 26.54236 | 4.730225 | 3.09715  | 0.035796 | 0.354836 | UP   | 509.0923 | 509.092  |
| 521 | M611T30  | 60.35624 | 5.915431 | 3.110479 | 0.03581  | 0.354837 | UP   | 610.9971 | 610.9962 |
| 522 | M589T26_ | 5.235182 | 2.38824  | 2.580191 | 0.035852 | 0.354837 | UP   | 588.8692 | 588.8685 |
| 523 | M609T26  | 18.87577 | 4.238463 | 3.063987 | 0.035855 | 0.354837 | UP   | 609.0179 | 609.0171 |
| 524 | M522T32_ | 7.580053 | 2.922208 | 3.067086 | 0.035866 | 0.354837 | UP   | 522.2505 | 522.2441 |
| 525 | M691T30_ | 1.252242 | 0.324513 | 2.524102 | 0.035882 | 0.354838 | UP   | 691.4629 | 691.4621 |
| 526 | M320T32  | 11.53041 | 3.527372 | 3.103254 | 0.035941 | 0.354839 | UP   | 320.2305 | 320.2305 |
| 527 | M338T41  | 1.506696 | -0.59139 | -2.53347 | 0.035949 | 0.354839 | DOWN | 338.1777 | 338.1777 |
| 528 | M271T11_ | 2.883008 | 1.527575 | 2.524413 | 0.035999 | 0.354839 | UP   | 271.0869 | 271.0863 |
| 529 | M291T18  | 5.601467 | -2.4858  | -2.92968 | 0.036025 | 0.35484  | DOWN | 291.086  | 291.0855 |
| 530 | M303T33  | 126.7463 | 6.9858   | 3.105124 | 0.036033 | 0.35484  | UP   | 303.2323 | 303.232  |
| 531 | M277T37  | 7.663034 | 2.937916 | 3.10214  | 0.036061 | 0.35484  | UP   | 277.2163 | 277.2162 |
| 532 | M369T10_ | 14.88267 | 3.895562 | 3.034979 | 0.036076 | 0.354841 | UP   | 369.2132 | 369.2114 |
| 533 | M238T22  | 3.001536 | -1.5857  | -2.97465 | 0.036166 | 0.354842 | DOWN | 238.1116 | 238.111  |
| 534 | M574T33_ | 46.69105 | 5.545074 | 3.097758 | 0.036179 | 0.354842 | UP   | 574.109  | 574.109  |
| 535 | M333T36  | 295.8671 | 8.208805 | 3.100872 | 0.03619  | 0.354842 | UP   | 333.2428 | 333.2426 |
| 536 | M481T23  | 91.62506 | 6.51767  | 3.099276 | 0.03624  | 0.354843 | UP   | 481.1524 | 481.1521 |
| 537 | M456T24_ | 22.6551  | 4.501764 | 3.085533 | 0.036303 | 0.354844 | UP   | 456.1473 | 456.1469 |
| 538 | M235T31  | 7.402979 | 2.888106 | 3.096321 | 0.036312 | 0.354844 | UP   | 235.1694 | 235.1693 |
| 539 | M419T31  | 5.276632 | 2.399617 | 3.03345  | 0.03638  | 0.354845 | UP   | 419.1519 | 419.1518 |
| 540 | M329T22_ | 4.244665 | -2.08565 | -2.89058 | 0.036496 | 0.354847 | DOWN | 329.1113 | 329.1109 |
| 541 | M414T24  | 31.582   | 4.981031 | 3.091523 | 0.036515 | 0.354847 | UP   | 414.249  | 414.249  |
| 542 | M345T30_ | 5.45829  | 2.448449 | 2.965892 | 0.036602 | 0.354848 | UP   | 345.1356 | 345.1353 |
| 543 | M224T25_ | 74.16033 | 6.212576 | 3.085867 | 0.036646 | 0.354849 | UP   | 224.1728 | 224.1726 |
| 544 | M628T20  | 23.85548 | 4.576249 | 3.085991 | 0.036646 | 0.354849 | UP   | 628.3271 | 628.3268 |
| 545 | M640T43  | 3.472611 | 1.796021 | 2.528453 | 0.036656 | 0.354849 | UP   | 639.9494 | 639.949  |
| 546 | M350T30_ | 23.52232 | 4.555959 | 3.081596 | 0.036751 | 0.35485  | UP   | 350.2412 | 350.2409 |
| 547 | M411T24_ | 8.590941 | 3.102816 | 2.992109 | 0.036799 | 0.354851 | UP   | 411.1478 | 411.1475 |
| 548 | M523T33  | 120.8359 | 6.916905 | 3.083363 | 0.036801 | 0.354851 | UP   | 523.0922 | 523.092  |
| 549 | M562T33_ | 598.3304 | 9.224798 | 3.079048 | 0.036965 | 0.354853 | UP   | 562.1192 | 562.1185 |
| 550 | M209T33  | 285.7859 | 8.158791 | 3.078843 | 0.036971 | 0.354853 | UP   | 208.5979 | 208.5978 |
| 551 | M303T39_ | 328.4108 | 8.359358 | 3.077763 | 0.037012 | 0.354854 | UP   | 303.232  | 303.2318 |
| 552 | M186T27  | 4.388447 | 2.13371  | 2.847389 | 0.037029 | 0.354854 | UP   | 186.0746 | 186.0745 |
| 553 | M674T34  | 14.44618 | 3.852616 | 3.036033 | 0.03706  | 0.354855 | UP   | 673.5299 | 673.529  |
| 554 | M638T31  | 34.99545 | 5.129095 | 3.072172 | 0.037066 | 0.354855 | UP   | 638.0157 | 638.0151 |
| 555 | M478T24_ | 14.93663 | 3.900783 | 3.071998 | 0.037067 | 0.354855 | UP   | 478.2953 | 478.2951 |
| 556 | M333T37_ | 73.87143 | 6.206945 | 3.074968 | 0.037113 | 0.354855 | UP   | 333.4555 | 333.453  |
| 557 | M332T37_ | 36.9071  | 5.205827 | 3.05676  | 0.037161 | 0.354856 | UP   | 331.8349 | 331.8348 |
| 558 | M177T37  | 6.488782 | 2.697948 | 3.069629 | 0.03717  | 0.354856 | UP   | 177.091  | 177.0909 |
| 559 | M164T34  | 28.51375 | 4.833586 | 3.072186 | 0.037196 | 0.354856 | UP   | 164.0423 | 164.0423 |
| 560 | M278T31_ | 3.717152 | 1.894198 | 2.538605 | 0.03725  | 0.354857 | UP   | 277.6316 | 277.631  |
| 561 | M381T23_ | 49.50987 | 5.629644 | 3.069609 | 0.03728  | 0.354858 | UP   | 381.2275 | 381.2274 |
| 562 | M1447T44 | 3.913778 | 1.968562 | 2.575665 | 0.037301 | 0.354858 | UP   | 1446.972 | 1446.971 |
| 563 | M551T31_ | 4.242328 | 2.084856 | 2.630338 | 0.037306 | 0.354858 | UP   | 551.0309 | 551.0309 |

|     |          |          |          |          |          |          |      |          |          |
|-----|----------|----------|----------|----------|----------|----------|------|----------|----------|
| 564 | M520T33  | 59.58663 | 5.896917 | 3.067132 | 0.03734  | 0.354858 | UP   | 520.0948 | 520.0947 |
| 565 | M788T30  | 13.62274 | -3.76794 | -3.0341  | 0.037446 | 0.35486  | DOWN | 788.19   | 788.1897 |
| 566 | M321T27_ | 5.954072 | 2.573877 | 2.92173  | 0.037474 | 0.35486  | UP   | 321.2429 | 321.2428 |
| 567 | M561T33  | 21.59416 | 4.43257  | 3.058263 | 0.037531 | 0.354861 | UP   | 561.1213 | 561.1209 |
| 568 | M321T31_ | 10.33255 | 3.369124 | 2.947916 | 0.037641 | 0.354862 | UP   | 320.8889 | 320.8886 |
| 569 | M391T26  | 81.61957 | 6.350843 | 3.059069 | 0.037684 | 0.354863 | UP   | 391.157  | 391.157  |
| 570 | M429T21  | 2.228897 | -1.15633 | -2.5655  | 0.037709 | 0.354863 | DOWN | 429.1255 | 429.118  |
| 571 | M563T31  | 29.38062 | 4.876793 | 3.052001 | 0.037753 | 0.354864 | UP   | 563.1033 | 563.1027 |
| 572 | M450T27_ | 76.772   | 6.262508 | 3.055943 | 0.037787 | 0.354864 | UP   | 450.1296 | 450.1294 |
| 573 | M289T18  | 5.663833 | -2.50178 | -2.94734 | 0.037847 | 0.354865 | DOWN | 289.0892 | 289.0886 |
| 574 | M513T24_ | 7.381861 | 2.883985 | 3.043181 | 0.03792  | 0.354866 | UP   | 513.2998 | 513.2996 |
| 575 | M174T30  | 10.74028 | 3.424959 | 3.030322 | 0.037923 | 0.354866 | UP   | 174.0689 | 174.0686 |
| 576 | M163T34  | 58.38332 | 5.867484 | 3.049465 | 0.03798  | 0.354867 | UP   | 163.039  | 163.0387 |
| 577 | M250T18  | 5.04984  | -2.33624 | -2.83888 | 0.037988 | 0.354867 | DOWN | 250.0596 | 250.0589 |
| 578 | M335T37_ | 382.1369 | 8.577946 | 3.050664 | 0.038003 | 0.354867 | UP   | 334.6587 | 334.6586 |
| 579 | M550T24  | 20.10401 | 4.329411 | 3.036083 | 0.038032 | 0.354868 | UP   | 550.1194 | 550.1191 |
| 580 | M458T33_ | 5.62122  | 2.490883 | 2.885331 | 0.038119 | 0.354869 | UP   | 458.3478 | 458.3467 |
| 581 | M523T11_ | 3.178259 | 1.668237 | 2.479013 | 0.038173 | 0.35487  | UP   | 523.364  | 523.3617 |
| 582 | M398T27_ | 12.62307 | 3.657991 | 3.035953 | 0.038179 | 0.35487  | UP   | 398.2259 | 398.2256 |
| 583 | M207T24  | 56.16724 | 5.811657 | 3.044138 | 0.038245 | 0.35487  | UP   | 207.1017 | 207.1017 |
| 584 | M496T30_ | 3.287277 | 1.716893 | 2.833959 | 0.038292 | 0.354871 | UP   | 495.8414 | 495.841  |
| 585 | M345T23_ | 16.33973 | 4.030312 | 3.038086 | 0.038308 | 0.354871 | UP   | 345.2064 | 345.2064 |
| 586 | M275T36  | 76.08708 | 6.24958  | 3.036975 | 0.03851  | 0.354874 | UP   | 275.2008 | 275.2007 |
| 587 | M586T29_ | 15.76779 | -3.97891 | -3.01921 | 0.038534 | 0.354874 | DOWN | 586.2481 | 586.2479 |
| 588 | M642T23  | 36.18122 | 5.177169 | 3.032972 | 0.038618 | 0.354875 | UP   | 642.3428 | 642.3423 |
| 589 | M219T16_ | 5.989126 | 2.582346 | 2.913786 | 0.038658 | 0.354876 | UP   | 219.0571 | 219.0567 |
| 590 | M335T38_ | 337.4123 | 8.398369 | 3.033221 | 0.038658 | 0.354876 | UP   | 335.2583 | 335.2582 |
| 591 | M443T23_ | 26.90628 | 4.749871 | 3.019693 | 0.038703 | 0.354876 | UP   | 443.0455 | 443.0452 |
| 592 | M471T26_ | 6.474519 | -2.69477 | -2.90724 | 0.038705 | 0.354876 | DOWN | 471.0445 | 471.0441 |
| 593 | M309T21  | 8.624987 | 3.108522 | 3.01672  | 0.038733 | 0.354877 | UP   | 309.1703 | 309.1699 |
| 594 | M333T30  | 174.9159 | 7.450518 | 3.029865 | 0.038785 | 0.354877 | UP   | 333.2427 | 333.2424 |
| 595 | M305T22_ | 91.84603 | 6.521145 | 3.029483 | 0.038788 | 0.354877 | UP   | 305.0952 | 305.0948 |
| 596 | M468T40_ | 3.846991 | -1.94373 | -2.4838  | 0.038802 | 0.354878 | DOWN | 468.4196 | 468.4161 |
| 597 | M154T31  | 6.043358 | -2.59535 | -2.99384 | 0.038803 | 0.354878 | DOWN | 153.9483 | 153.9482 |
| 598 | M217T37  | 7.35255  | 2.878245 | 3.010773 | 0.038808 | 0.354878 | UP   | 217.1587 | 217.1586 |
| 599 | M338T35  | 1.963673 | -0.97355 | -2.48307 | 0.038851 | 0.354878 | DOWN | 338.2328 | 338.2324 |
| 600 | M674T20  | 103.2064 | 6.689389 | 3.025139 | 0.038949 | 0.354879 | UP   | 674.3328 | 674.3326 |
| 601 | M355T38  | 43.51648 | 5.44349  | 3.024729 | 0.038965 | 0.35488  | UP   | 355.2244 | 355.2244 |
| 602 | M1157T44 | 3.767054 | 1.913437 | 2.536221 | 0.038994 | 0.35488  | UP   | 1156.794 | 1156.792 |
| 603 | M695T30  | 52.50866 | 5.714483 | 3.022233 | 0.039006 | 0.35488  | UP   | 695.0181 | 695.0176 |
| 604 | M414T32  | 13.82501 | 3.789209 | 3.018987 | 0.039112 | 0.354882 | UP   | 414.173  | 414.1726 |
| 605 | M334T38_ | 13.42025 | 3.746339 | 3.019597 | 0.039123 | 0.354882 | UP   | 334.2459 | 334.2459 |
| 606 | M415T33  | 5.713946 | 2.514487 | 2.915195 | 0.039148 | 0.354882 | UP   | 415.3251 | 415.3246 |
| 607 | M537T24  | 26.75416 | 4.741691 | 2.998613 | 0.039152 | 0.354882 | UP   | 537.0873 | 537.0866 |
| 608 | M335T39_ | 766.4929 | 9.582129 | 3.02023  | 0.039154 | 0.354882 | UP   | 335.2583 | 335.2582 |
| 609 | M592T23_ | 4.442785 | -2.15146 | -2.79503 | 0.039162 | 0.354882 | DOWN | 591.9371 | 591.9365 |
| 610 | M414T33_ | 6.24303  | 2.642246 | 2.921532 | 0.039183 | 0.354882 | UP   | 414.3216 | 414.3208 |

|     |          |          |          |          |          |          |      |          |          |
|-----|----------|----------|----------|----------|----------|----------|------|----------|----------|
| 611 | M401T10_ | 3.561472 | 1.832474 | 2.652016 | 0.039196 | 0.354883 | UP   | 400.9348 | 400.9287 |
| 612 | M289T36  | 13.13147 | 3.714957 | 3.016518 | 0.039199 | 0.354883 | UP   | 289.2164 | 289.2164 |
| 613 | M516T30_ | 137.2491 | 7.100653 | 3.018406 | 0.039225 | 0.354883 | UP   | 516.1133 | 516.1126 |
| 614 | M331T27_ | 16.77264 | 4.068038 | 3.012551 | 0.039231 | 0.354883 | UP   | 331.2327 | 331.227  |
| 615 | M203T37  | 5.241361 | 2.389942 | 3.006604 | 0.039258 | 0.354883 | UP   | 203.143  | 203.1429 |
| 616 | M333T37_ | 21.57481 | 4.431276 | 2.99821  | 0.039268 | 0.354883 | UP   | 333.0999 | 333.095  |
| 617 | M352T31  | 94.05061 | 6.555365 | 3.015855 | 0.039286 | 0.354884 | UP   | 352.2566 | 352.2563 |
| 618 | M324T35  | 18.26576 | 4.19107  | 3.002924 | 0.039345 | 0.354884 | UP   | 324.2617 | 324.2616 |
| 619 | M247T30  | 9.072769 | 3.181543 | 2.999939 | 0.039374 | 0.354885 | UP   | 247.1695 | 247.1694 |
| 620 | M381T25_ | 32.81076 | 5.036097 | 3.013181 | 0.039386 | 0.354885 | UP   | 381.2277 | 381.2276 |
| 621 | M379T29_ | 18.16486 | 4.183078 | 3.011899 | 0.039387 | 0.354885 | UP   | 379.212  | 379.2117 |
| 622 | M389T22_ | 16.82285 | 4.07235  | 2.967936 | 0.039446 | 0.354886 | UP   | 389.1414 | 389.1411 |
| 623 | M151T39  | 4.019433 | 2.006992 | 2.999832 | 0.03945  | 0.354886 | UP   | 151.1117 | 151.1116 |
| 624 | M943T32  | 2.332789 | 1.222056 | 2.497096 | 0.039488 | 0.354886 | UP   | 942.6376 | 942.6363 |
| 625 | M413T30_ | 5.11428  | 2.354531 | 2.566206 | 0.039491 | 0.354886 | UP   | 413.0684 | 413.0677 |
| 626 | M373T33_ | 12.0864  | 3.595313 | 3.001205 | 0.039581 | 0.354887 | UP   | 373.1668 | 373.1667 |
| 627 | M883T41  | 4.894116 | 2.291048 | 2.700236 | 0.03972  | 0.354889 | UP   | 883.1617 | 883.1613 |
| 628 | M855T41  | 5.755654 | 2.52498  | 2.705321 | 0.039728 | 0.354889 | UP   | 855.1667 | 855.1665 |
| 629 | M493T24_ | 18.16093 | 4.182766 | 3.004109 | 0.039761 | 0.354889 | UP   | 493.2733 | 493.2731 |
| 630 | M552T44  | 5.18016  | -2.373   | -2.99419 | 0.039799 | 0.35489  | DOWN | 552.4379 | 552.4372 |
| 631 | M1207T44 | 7.881225 | 2.97842  | 2.79618  | 0.039814 | 0.35489  | UP   | 1206.742 | 1206.742 |
| 632 | M283T19_ | 3.755169 | 1.908878 | 2.989147 | 0.039939 | 0.354892 | UP   | 283.1543 | 283.1542 |
| 633 | M562T33_ | 91.28834 | 6.512359 | 2.999542 | 0.039939 | 0.354892 | UP   | 562.119  | 562.119  |
| 634 | M341T31_ | 28.92656 | 4.854323 | 2.999284 | 0.039952 | 0.354892 | UP   | 341.209  | 341.2089 |
| 635 | M470T21  | 3.157948 | -1.65899 | -2.62509 | 0.039964 | 0.354892 | DOWN | 470.1526 | 470.1516 |
| 636 | M435T37  | 18.88713 | 4.239331 | 2.992344 | 0.040137 | 0.354894 | UP   | 435.1675 | 435.1674 |
| 637 | M207T27_ | 6.148432 | 2.620219 | 2.99022  | 0.040142 | 0.354894 | UP   | 207.1018 | 207.1017 |
| 638 | M1041T44 | 4.610184 | 2.204824 | 2.614927 | 0.040163 | 0.354894 | UP   | 1040.731 | 1040.731 |
| 639 | M272T3   | 1.49726  | 0.582325 | 2.526526 | 0.040169 | 0.354894 | UP   | 271.9165 | 271.9164 |
| 640 | M332T37_ | 220.4229 | 7.784131 | 2.992951 | 0.040218 | 0.354895 | UP   | 332.4793 | 332.4791 |
| 641 | M398T32  | 6.879534 | 2.782311 | 2.626559 | 0.040248 | 0.354895 | UP   | 397.5712 | 397.5712 |
| 642 | M553T34_ | 2.637744 | -1.3993  | -2.70934 | 0.040262 | 0.354895 | DOWN | 553.4682 | 553.4677 |
| 643 | M362T44  | 4.206696 | -2.07269 | -2.94831 | 0.040292 | 0.354896 | DOWN | 362.1848 | 362.1841 |
| 644 | M403T44_ | 2.615305 | -1.38698 | -2.9592  | 0.040386 | 0.354897 | DOWN | 403.2109 | 403.2104 |
| 645 | M642T24  | 12.75117 | 3.672558 | 2.968304 | 0.040407 | 0.354897 | UP   | 642.343  | 642.3429 |
| 646 | M865T45  | 4.401045 | 2.137846 | 2.760269 | 0.040531 | 0.354899 | UP   | 864.6264 | 864.626  |
| 647 | M351T31_ | 119.2146 | 6.897417 | 2.984384 | 0.040557 | 0.354899 | UP   | 351.2533 | 351.2531 |
| 648 | M321T34  | 54.47176 | 5.767437 | 2.982867 | 0.040591 | 0.354899 | UP   | 321.2427 | 321.2427 |
| 649 | M416T33_ | 10.83216 | 3.437248 | 2.977714 | 0.040652 | 0.3549   | UP   | 416.1885 | 416.1885 |
| 650 | M319T29_ | 4.114506 | 2.040719 | 2.439388 | 0.04071  | 0.354901 | UP   | 318.588  | 318.5877 |
| 651 | M337T3   | 509.3223 | 8.992435 | 2.9783   | 0.040807 | 0.354902 | UP   | 336.8029 | 336.8027 |
| 652 | M307T36_ | 103.7544 | 6.697028 | 2.977756 | 0.040826 | 0.354902 | UP   | 307.227  | 307.227  |
| 653 | M715T31_ | 11.65686 | -3.54311 | -2.94306 | 0.040835 | 0.354902 | DOWN | 715.1766 | 715.1765 |
| 654 | M400T20  | 9.359556 | -3.22644 | -2.94694 | 0.040844 | 0.354902 | DOWN | 400.1273 | 400.1267 |
| 655 | M813T33  | 2.151092 | 1.105069 | 2.473219 | 0.040847 | 0.354902 | UP   | 812.5651 | 812.5633 |
| 656 | M460T43  | 1.50993  | 0.594481 | 2.484605 | 0.040879 | 0.354903 | UP   | 460.2775 | 460.2768 |
| 657 | M375T34  | 57.19912 | 5.837921 | 2.976183 | 0.040886 | 0.354903 | UP   | 375.1619 | 375.1619 |

|     |          |          |          |          |          |          |      |          |          |
|-----|----------|----------|----------|----------|----------|----------|------|----------|----------|
| 658 | M177T31  | 2.834409 | 1.503048 | 2.895577 | 0.040925 | 0.354903 | UP   | 177.0911 | 177.091  |
| 659 | M374T32_ | 5.388872 | 2.429983 | 2.96161  | 0.04099  | 0.354904 | UP   | 374.1499 | 374.145  |
| 660 | M403T30_ | 4.367615 | 2.126846 | 2.872891 | 0.041052 | 0.354905 | UP   | 403.1569 | 403.1568 |
| 661 | M335T37_ | 51.72641 | 5.692829 | 2.97174  | 0.041069 | 0.354905 | UP   | 335.2487 | 335.2486 |
| 662 | M286T33_ | 2.042571 | -1.03039 | -2.68627 | 0.041084 | 0.354905 | DOWN | 286.3104 | 286.31   |
| 663 | M333T37_ | 51.23516 | 5.679062 | 2.971426 | 0.041086 | 0.354905 | UP   | 333.0442 | 333.0429 |
| 664 | M568T31_ | 4.59526  | 2.200147 | 2.444925 | 0.041123 | 0.354905 | UP   | 568.0978 | 568.0974 |
| 665 | M355T37  | 174.3931 | 7.446199 | 2.970235 | 0.041134 | 0.354905 | UP   | 355.2243 | 355.2242 |
| 666 | M179T24  | 4.516255 | 2.175127 | 2.96261  | 0.041151 | 0.354906 | UP   | 179.1068 | 179.1067 |
| 667 | M433T37_ | 200.4549 | 7.647134 | 2.969783 | 0.041153 | 0.354906 | UP   | 433.1672 | 433.167  |
| 668 | M367T22  | 6.955898 | 2.798237 | 2.941858 | 0.041181 | 0.354906 | UP   | 367.2484 | 367.2483 |
| 669 | M448T45  | 1.291725 | 0.369299 | 2.441239 | 0.041184 | 0.354906 | UP   | 447.8494 | 447.8483 |
| 670 | M259T3   | 9.410844 | 3.234324 | 2.955856 | 0.04125  | 0.354907 | UP   | 258.8861 | 258.8858 |
| 671 | M522T33  | 239.5164 | 7.903981 | 2.967338 | 0.041251 | 0.354907 | UP   | 522.0956 | 522.0956 |
| 672 | M337T24_ | 4.840227 | 2.275075 | 2.881159 | 0.041281 | 0.354907 | UP   | 337.2376 | 337.2373 |
| 673 | M855T33  | 2.081549 | 1.057657 | 2.461765 | 0.041295 | 0.354907 | UP   | 854.585  | 854.5833 |
| 674 | M217T31  | 2.783181 | 1.476735 | 2.838781 | 0.041311 | 0.354907 | UP   | 217.1589 | 217.1587 |
| 675 | M159T37  | 23.52203 | 4.555941 | 2.961156 | 0.041326 | 0.354908 | UP   | 159.0452 | 159.0452 |
| 676 | M512T23_ | 22.91069 | 4.517949 | 2.961973 | 0.041341 | 0.354908 | UP   | 512.2871 | 512.2869 |
| 677 | M473T31  | 32.63658 | -5.02842 | -2.96435 | 0.041354 | 0.354908 | DOWN | 473.1616 | 473.1616 |
| 678 | M424T22  | 18.73225 | -4.22745 | -2.95534 | 0.04137  | 0.354908 | DOWN | 424.2054 | 424.2045 |
| 679 | M389T26_ | 4.144411 | 2.051167 | 2.904162 | 0.041534 | 0.35491  | UP   | 389.1618 | 389.1614 |
| 680 | M815T27  | 15.63891 | 3.967068 | 2.929969 | 0.041546 | 0.35491  | UP   | 814.9333 | 814.9333 |
| 681 | M284T37  | 6.253503 | 2.644665 | 2.954178 | 0.041549 | 0.35491  | UP   | 284.2091 | 284.209  |
| 682 | M881T41  | 8.704692 | 3.121793 | 2.836131 | 0.041625 | 0.354911 | UP   | 881.1669 | 881.1667 |
| 683 | M349T30_ | 185.4394 | 7.534804 | 2.957964 | 0.041638 | 0.354911 | UP   | 349.2378 | 349.2376 |
| 684 | M662T43  | 3.093511 | 1.629245 | 2.425589 | 0.041639 | 0.354911 | UP   | 661.9628 | 661.9624 |
| 685 | M578T26  | 10.61271 | -3.40772 | -2.93134 | 0.041683 | 0.354912 | DOWN | 578.224  | 578.2238 |
| 686 | M417T33  | 14.10191 | 3.817819 | 2.947853 | 0.041711 | 0.354912 | UP   | 417.1921 | 417.1919 |
| 687 | M303T38  | 18.56448 | 4.214473 | 2.955419 | 0.04174  | 0.354912 | UP   | 303.2321 | 303.232  |
| 688 | M441T31  | 161.1502 | 7.332262 | 2.954886 | 0.041763 | 0.354912 | UP   | 441.1339 | 441.1336 |
| 689 | M713T43_ | 1.397807 | 0.483165 | 2.437567 | 0.041807 | 0.354913 | UP   | 713.01   | 713.009  |
| 690 | M630T31_ | 21.54173 | -4.42906 | -2.95136 | 0.041827 | 0.354913 | DOWN | 630.2355 | 630.2351 |
| 691 | M700T31_ | 47.74074 | 5.577149 | 2.949029 | 0.041951 | 0.354914 | UP   | 700.3423 | 700.3422 |
| 692 | M336T39_ | 145.7028 | 7.186884 | 2.950032 | 0.041958 | 0.354915 | UP   | 336.2617 | 336.2616 |
| 693 | M336T37_ | 233.8695 | 7.86956  | 2.949985 | 0.041968 | 0.354915 | UP   | 336.0264 | 336.0263 |
| 694 | M658T21  | 99.3143  | 6.63393  | 2.947859 | 0.042036 | 0.354915 | UP   | 658.3386 | 658.3384 |
| 695 | M293T18  | 4.722858 | -2.23966 | -2.8045  | 0.04208  | 0.354916 | DOWN | 293.0845 | 293.0843 |
| 696 | M643T23  | 41.35047 | 5.369832 | 2.945651 | 0.04214  | 0.354916 | UP   | 643.3463 | 643.3462 |
| 697 | M320T33_ | 204.705  | 7.677402 | 2.944081 | 0.042212 | 0.354917 | UP   | 319.5782 | 319.5782 |
| 698 | M518T31_ | 247.721  | 7.952572 | 2.94169  | 0.042317 | 0.354918 | UP   | 518.0791 | 518.0789 |
| 699 | M280T16  | 5.970212 | 2.577782 | 2.869416 | 0.042318 | 0.354918 | UP   | 280.097  | 280.0963 |
| 700 | M310T37  | 10.63369 | 3.410571 | 2.929746 | 0.042359 | 0.354919 | UP   | 310.2459 | 310.2458 |
| 701 | M498T20  | 19.8472  | 4.310863 | 2.933219 | 0.04236  | 0.354919 | UP   | 498.2719 | 498.2717 |
| 702 | M596T27_ | 26.36014 | 4.720286 | 2.931086 | 0.042413 | 0.354919 | UP   | 596.0601 | 596.06   |
| 703 | M248T30_ | 11.37316 | 3.507561 | 2.914354 | 0.042416 | 0.354919 | UP   | 248.1729 | 248.1728 |
| 704 | M769T33  | 2.099927 | 1.070339 | 2.493915 | 0.042421 | 0.354919 | UP   | 768.5387 | 768.5378 |

|     |          |          |          |          |          |          |      |          |          |
|-----|----------|----------|----------|----------|----------|----------|------|----------|----------|
| 705 | M441T33_ | 6.553285 | 2.712218 | 2.840219 | 0.042489 | 0.35492  | UP   | 441.3213 | 441.3204 |
| 706 | M714T31  | 17.72208 | -4.14748 | -2.93166 | 0.042497 | 0.35492  | DOWN | 714.1739 | 714.1735 |
| 707 | M577T22  | 4.721183 | 2.239148 | 2.550854 | 0.042513 | 0.35492  | UP   | 576.8487 | 576.8479 |
| 708 | M335T39_ | 3433.42  | 11.74543 | 2.936543 | 0.042535 | 0.354921 | UP   | 335.2581 | 335.2579 |
| 709 | M785T44  | 7.815013 | 2.966248 | 2.736002 | 0.042667 | 0.354922 | UP   | 785.2683 | 785.2678 |
| 710 | M389T26_ | 14.10023 | 3.817646 | 2.911108 | 0.042682 | 0.354922 | UP   | 389.1415 | 389.1413 |
| 711 | M637T31  | 330.8534 | 8.370048 | 2.932633 | 0.042701 | 0.354922 | UP   | 637.0126 | 637.0123 |
| 712 | M342T31_ | 45.43686 | 5.505791 | 2.92992  | 0.042751 | 0.354923 | UP   | 342.2123 | 342.2122 |
| 713 | M390T37_ | 1.429709 | -0.51572 | -2.49526 | 0.042755 | 0.354923 | DOWN | 390.1699 | 390.1698 |
| 714 | M764T29  | 37.64596 | -5.23442 | -2.92487 | 0.042814 | 0.354924 | DOWN | 764.1724 | 764.1723 |
| 715 | M264T22_ | 111.9695 | 6.806962 | 2.928892 | 0.042858 | 0.354924 | UP   | 264.0685 | 264.0682 |
| 716 | M437T37  | 9.034241 | 3.175403 | 2.898699 | 0.042868 | 0.354924 | UP   | 437.1631 | 437.1628 |
| 717 | M793T34  | 2.096983 | -1.06832 | -2.54711 | 0.043027 | 0.354926 | DOWN | 793.4413 | 793.4405 |
| 718 | M293T34_ | 34.79328 | 5.120737 | 2.920686 | 0.043034 | 0.354926 | UP   | 293.175  | 293.1746 |
| 719 | M967T44  | 1.602154 | 0.680013 | 2.40187  | 0.04307  | 0.354926 | UP   | 966.7216 | 966.7202 |
| 720 | M406T18_ | 5.309106 | -2.40847 | -2.75101 | 0.043152 | 0.354927 | DOWN | 405.9818 | 405.9814 |
| 721 | M336T39_ | 1618.487 | 10.66043 | 2.921895 | 0.043162 | 0.354927 | UP   | 336.2616 | 336.2613 |
| 722 | M545T31  | 59.09301 | 5.884916 | 2.920028 | 0.043163 | 0.354927 | UP   | 545.0933 | 545.0928 |
| 723 | M750T44  | 2.671259 | 1.41752  | 2.723524 | 0.043164 | 0.354927 | UP   | 750.3895 | 750.389  |
| 724 | M621T31  | 29.50655 | -4.88296 | -2.91653 | 0.043351 | 0.354929 | DOWN | 621.2482 | 621.2482 |
| 725 | M347T25_ | 20.98693 | 4.391419 | 2.904383 | 0.043357 | 0.354929 | UP   | 347.2222 | 347.2218 |
| 726 | M454T9_2 | 2.182727 | -1.12613 | -2.40419 | 0.043373 | 0.354929 | DOWN | 453.6826 | 453.6717 |
| 727 | M447T45  | 1.240712 | 0.311168 | 2.396859 | 0.043393 | 0.35493  | UP   | 447.3476 | 447.3466 |
| 728 | M365T26_ | 108.0974 | 6.756188 | 2.91573  | 0.043426 | 0.35493  | UP   | 365.2327 | 365.2326 |
| 729 | M407T27  | 8.331197 | 3.058524 | 2.849529 | 0.043471 | 0.35493  | UP   | 407.1366 | 407.1364 |
| 730 | M309T38  | 23.58628 | 4.559876 | 2.914518 | 0.043479 | 0.35493  | UP   | 309.2427 | 309.2426 |
| 731 | M779T43_ | 1.598893 | 0.677074 | 2.439982 | 0.043479 | 0.35493  | UP   | 778.5482 | 778.5467 |
| 732 | M558T28  | 7.648763 | -2.93523 | -2.85767 | 0.043559 | 0.354931 | DOWN | 558.2341 | 558.234  |
| 733 | M167T27  | 3.423912 | -1.77565 | -2.83754 | 0.043565 | 0.354931 | DOWN | 167.0339 | 167.0338 |
| 734 | M303T30  | 4.645232 | 2.215751 | 2.766708 | 0.043581 | 0.354931 | UP   | 303.2322 | 303.232  |
| 735 | M323T33_ | 13.9497  | 3.802162 | 2.893103 | 0.04366  | 0.354932 | UP   | 322.9203 | 322.9202 |
| 736 | M400T38  | 1.335899 | -0.41781 | -2.39855 | 0.043661 | 0.354932 | DOWN | 400.3784 | 400.3778 |
| 737 | M811T33  | 2.043766 | 1.03123  | 2.483298 | 0.043706 | 0.354933 | UP   | 810.5586 | 810.5569 |
| 738 | M475T25  | 3.571038 | 1.836344 | 2.747242 | 0.043706 | 0.354933 | UP   | 475.161  | 475.1607 |
| 739 | M947T44  | 3.906871 | 1.966014 | 2.578307 | 0.043768 | 0.354933 | UP   | 946.5589 | 946.5576 |
| 740 | M693T31  | 70.91197 | 6.147957 | 2.907481 | 0.043772 | 0.354933 | UP   | 693.3666 | 693.3665 |
| 741 | M349T30_ | 20.03203 | 4.324237 | 2.883116 | 0.043847 | 0.354934 | UP   | 349.1313 | 349.131  |
| 742 | M191T3   | 4.122151 | 2.043397 | 2.759773 | 0.043862 | 0.354934 | UP   | 190.9875 | 190.9875 |
| 743 | M524T23  | 18.98905 | -4.2471  | -2.89138 | 0.043874 | 0.354934 | DOWN | 524.1339 | 524.1327 |
| 744 | M687T31  | 6.239857 | 2.641513 | 2.539707 | 0.043959 | 0.354935 | UP   | 686.9399 | 686.9386 |
| 745 | M303T39_ | 59.54968 | 5.896022 | 2.901662 | 0.044041 | 0.354936 | UP   | 303.232  | 303.2319 |
| 746 | M486T38  | 1.415641 | -0.50146 | -2.60042 | 0.044042 | 0.354936 | DOWN | 486.1255 | 486.125  |
| 747 | M348T25  | 22.29046 | 4.478355 | 2.897243 | 0.044046 | 0.354936 | UP   | 348.1262 | 348.126  |
| 748 | M179T39  | 9.541928 | 3.254281 | 2.899541 | 0.044092 | 0.354936 | UP   | 179.1067 | 179.1065 |
| 749 | M303T37_ | 68.43683 | 6.096701 | 2.90001  | 0.044118 | 0.354937 | UP   | 302.7393 | 302.7391 |
| 750 | M407T36  | 11.13656 | 3.477232 | 2.893922 | 0.044121 | 0.354937 | UP   | 407.1517 | 407.1516 |
| 751 | M356T37  | 86.88115 | 6.440971 | 2.899661 | 0.044126 | 0.354937 | UP   | 356.2276 | 356.2275 |



|     |          |          |          |          |          |          |      |          |          |
|-----|----------|----------|----------|----------|----------|----------|------|----------|----------|
| 752 | M459T33_ | 7.011092 | 2.809639 | 2.824624 | 0.044134 | 0.354937 | UP   | 459.3512 | 459.3507 |
| 753 | M504T31  | 60.2909  | 5.913868 | 2.897586 | 0.044164 | 0.354937 | UP   | 504.1079 | 504.1077 |
| 754 | M195T37_ | 1.891088 | -0.91922 | -2.70005 | 0.044167 | 0.354937 | DOWN | 195.0846 | 195.0846 |
| 755 | M490T27_ | 38.65919 | 5.27274  | 2.894443 | 0.044292 | 0.354938 | UP   | 490.1529 | 490.1529 |
| 756 | M560T32_ | 53.15322 | 5.732085 | 2.89373  | 0.044326 | 0.354939 | UP   | 560.1033 | 560.1028 |
| 757 | M534T31_ | 3.929556 | -1.97437 | -2.80313 | 0.044369 | 0.354939 | DOWN | 534.2957 | 534.2892 |
| 758 | M477T22  | 3.744906 | 1.90493  | 2.45016  | 0.044389 | 0.354939 | UP   | 476.9236 | 476.9229 |
| 759 | M179T33  | 4.869678 | 2.283827 | 2.890278 | 0.044511 | 0.354941 | UP   | 179.1068 | 179.1067 |
| 760 | M695T23  | 73.08407 | 6.191485 | 2.888267 | 0.044632 | 0.354942 | UP   | 695.2501 | 695.2497 |
| 761 | M649T44  | 2.384639 | 1.253771 | 2.452644 | 0.044676 | 0.354942 | UP   | 649.4609 | 649.4601 |
| 762 | M301T32  | 20.18955 | 4.335537 | 2.886451 | 0.044705 | 0.354942 | UP   | 301.2166 | 301.2165 |
| 763 | M515T16  | 3.130391 | 1.646343 | 2.524435 | 0.044708 | 0.354942 | UP   | 514.861  | 514.8609 |
| 764 | M410T19_ | 18.22755 | 4.188049 | 2.86814  | 0.044709 | 0.354942 | UP   | 410.2905 | 410.2901 |
| 765 | M349T26  | 20.67578 | 4.36987  | 2.883412 | 0.044728 | 0.354943 | UP   | 349.2014 | 349.2012 |
| 766 | M591T32_ | 2.739902 | 1.454125 | 2.391037 | 0.044736 | 0.354943 | UP   | 590.9021 | 590.9011 |
| 767 | M780T39  | 93.22957 | 6.542716 | 2.882847 | 0.044859 | 0.354944 | UP   | 780.0483 | 780.0481 |
| 768 | M563T33  | 270.191  | 8.077836 | 2.882295 | 0.044908 | 0.354944 | UP   | 563.1225 | 563.1221 |
| 769 | M247T24_ | 6.065776 | 2.600692 | 2.652672 | 0.044932 | 0.354945 | UP   | 246.5974 | 246.5973 |
| 770 | M331T35_ | 15.76341 | 3.978508 | 2.878344 | 0.04498  | 0.354945 | UP   | 331.2269 | 331.2269 |
| 771 | M594T31_ | 36.30132 | -5.18195 | -2.8765  | 0.04502  | 0.354945 | DOWN | 594.2294 | 594.2291 |
| 772 | M216T39  | 526.7512 | 9.040978 | 2.878061 | 0.045101 | 0.354946 | UP   | 215.6055 | 215.6054 |
| 773 | M608T29  | 5.780718 | -2.53125 | -2.79629 | 0.045282 | 0.354948 | DOWN | 608.2499 | 608.2494 |
| 774 | M595T27_ | 17.89892 | 4.161801 | 2.862478 | 0.045286 | 0.354948 | UP   | 595.0775 | 595.0765 |
| 775 | M491T26_ | 3.19544  | 1.676015 | 2.408354 | 0.045301 | 0.354948 | UP   | 491.1798 | 491.1795 |
| 776 | M673T34_ | 11.61467 | 3.537876 | 2.83894  | 0.045303 | 0.354948 | UP   | 672.5265 | 672.5252 |
| 777 | M246T24  | 4.137277 | 2.048681 | 2.475683 | 0.04549  | 0.35495  | UP   | 246.0956 | 246.0954 |
| 778 | M475T31  | 25.96705 | 4.69861  | 2.844325 | 0.045559 | 0.35495  | UP   | 474.7106 | 474.7103 |
| 779 | M350T31_ | 13.94466 | 3.80164  | 2.830288 | 0.045619 | 0.354951 | UP   | 350.1496 | 350.1495 |
| 780 | M418T22_ | 8.251442 | 3.044646 | 2.850373 | 0.045767 | 0.354952 | UP   | 418.2805 | 418.2804 |
| 781 | M737T31  | 269.4536 | 8.073893 | 2.862934 | 0.045792 | 0.354953 | UP   | 736.9377 | 736.9373 |
| 782 | M667T44  | 2.911852 | 1.541937 | 2.372822 | 0.045833 | 0.354953 | UP   | 667.3322 | 667.3313 |
| 783 | M337T39_ | 675.1649 | 9.399096 | 2.861529 | 0.045858 | 0.354953 | UP   | 337.0468 | 337.0466 |
| 784 | M307T19_ | 80.31282 | 6.327558 | 2.859972 | 0.045921 | 0.354954 | UP   | 307.063  | 307.0629 |
| 785 | M489T38  | 4.184632 | -2.0651  | -2.81256 | 0.046026 | 0.354955 | DOWN | 489.0835 | 489.0834 |
| 786 | M512T11_ | 2.92764  | -1.54974 | -2.49942 | 0.046089 | 0.354955 | DOWN | 512.1628 | 512.1616 |
| 787 | M578T27  | 2.490993 | -1.31672 | -2.50176 | 0.046122 | 0.354956 | DOWN | 578.276  | 578.2759 |
| 788 | M411T21_ | 16.46183 | 4.041053 | 2.851683 | 0.046155 | 0.354956 | UP   | 411.1835 | 411.1833 |
| 789 | M284T19  | 5.498913 | 2.459146 | 2.83813  | 0.046188 | 0.354956 | UP   | 284.1576 | 284.1575 |
| 790 | M368T22_ | 21.09773 | 4.399016 | 2.840158 | 0.046218 | 0.354956 | UP   | 368.2519 | 368.2517 |
| 791 | M414T30_ | 5.276213 | 2.399503 | 2.451383 | 0.04625  | 0.354957 | UP   | 414.0719 | 414.0715 |
| 792 | M779T43_ | 1.684686 | 0.752479 | 2.487134 | 0.046307 | 0.354957 | UP   | 779.0498 | 779.0492 |
| 793 | M338T33  | 52.11582 | 5.703649 | 2.847519 | 0.046365 | 0.354958 | UP   | 338.2693 | 338.269  |
| 794 | M363T22_ | 27.78534 | 4.796252 | 2.848381 | 0.046462 | 0.354959 | UP   | 363.217  | 363.2169 |
| 795 | M302T38  | 7.03013  | 2.813551 | 2.846432 | 0.046475 | 0.354959 | UP   | 302.2197 | 302.2196 |
| 796 | M353T26  | 62.57658 | 5.967551 | 2.8464   | 0.046493 | 0.354959 | UP   | 353.269  | 353.2689 |
| 797 | M764T31_ | 51.69965 | 5.692083 | 2.8454   | 0.046497 | 0.354959 | UP   | 764.018  | 764.0177 |
| 798 | M394T39_ | 31.37597 | 4.971588 | 2.846353 | 0.046503 | 0.354959 | UP   | 394.3315 | 394.3311 |

|     |          |          |          |          |          |          |      |          |          |
|-----|----------|----------|----------|----------|----------|----------|------|----------|----------|
| 799 | M568T24  | 18.80255 | 4.232856 | 2.821844 | 0.046553 | 0.354959 | UP   | 568.0696 | 568.0692 |
| 800 | M826T11_ | 7.229491 | 2.853894 | 2.623527 | 0.046724 | 0.354961 | UP   | 826.0197 | 826.0189 |
| 801 | M333T39_ | 532.6598 | 9.057071 | 2.842629 | 0.046743 | 0.354961 | UP   | 333.4836 | 333.4834 |
| 802 | M336T38  | 157.4088 | 7.298372 | 2.842046 | 0.046767 | 0.354961 | UP   | 336.2617 | 336.2617 |
| 803 | M606T29  | 6.442303 | -2.68758 | -2.75542 | 0.046975 | 0.354963 | DOWN | 606.2532 | 606.2526 |
| 804 | M899T33  | 2.052466 | 1.037358 | 2.35017  | 0.047002 | 0.354963 | UP   | 898.6112 | 898.6099 |
| 805 | M281T14  | 29.77708 | 4.89613  | 2.826176 | 0.047036 | 0.354964 | UP   | 281.0474 | 281.0473 |
| 806 | M618T44  | 5.059721 | -2.33906 | -2.79502 | 0.047064 | 0.354964 | DOWN | 618.4251 | 618.424  |
| 807 | M403T25  | 9.221218 | 3.204957 | 2.650796 | 0.047079 | 0.354964 | UP   | 403.1208 | 403.1207 |
| 808 | M691T31  | 1007.967 | 9.977233 | 2.835262 | 0.047093 | 0.354964 | UP   | 691.3667 | 691.3658 |
| 809 | M375T31_ | 4.981216 | 2.316498 | 2.807143 | 0.047107 | 0.354964 | UP   | 375.2473 | 375.2471 |
| 810 | M726T33  | 2.619653 | 1.389376 | 2.343781 | 0.047137 | 0.354964 | UP   | 725.5146 | 725.5126 |
| 811 | M429T42  | 1.21743  | 0.283839 | 2.359964 | 0.047155 | 0.354965 | UP   | 429.3    | 429.299  |
| 812 | M483T44_ | 8.325543 | 3.057544 | 2.682163 | 0.047183 | 0.354965 | UP   | 483.1126 | 483.112  |
| 813 | M262T23  | 12.36888 | 3.628643 | 2.826503 | 0.047187 | 0.354965 | UP   | 262.0865 | 262.0863 |
| 814 | M391T16_ | 1.904466 | -0.92939 | -2.45126 | 0.047286 | 0.354966 | DOWN | 391.2957 | 391.2956 |
| 815 | M368T19  | 21.35925 | 4.416789 | 2.829942 | 0.047289 | 0.354966 | UP   | 368.2337 | 368.2336 |
| 816 | M307T36_ | 9.403322 | 3.233171 | 2.828216 | 0.047324 | 0.354966 | UP   | 307.2271 | 307.2269 |
| 817 | M514T11_ | 3.611618 | -1.85265 | -2.55238 | 0.047472 | 0.354967 | DOWN | 514.1597 | 514.1584 |
| 818 | M551T44_ | 3.906317 | -1.96581 | -2.81032 | 0.04755  | 0.354968 | DOWN | 551.4349 | 551.4338 |
| 819 | M331T30_ | 12.50264 | 3.644161 | 2.811338 | 0.047612 | 0.354968 | UP   | 331.2271 | 331.2268 |
| 820 | M332T38  | 1.668111 | 0.738215 | 2.482323 | 0.047653 | 0.354969 | UP   | 332.1561 | 332.1558 |
| 821 | M601T24_ | 15.05679 | 3.912342 | 2.781556 | 0.047745 | 0.35497  | UP   | 601.0679 | 601.0679 |
| 822 | M581T37  | 52.06275 | 5.70218  | 2.819016 | 0.047776 | 0.35497  | UP   | 581.0971 | 581.0969 |
| 823 | M322T31  | 3.03496  | 1.601677 | 2.498966 | 0.047836 | 0.35497  | UP   | 321.9001 | 321.9001 |
| 824 | M237T33  | 3.736364 | 1.901635 | 2.769403 | 0.047846 | 0.35497  | UP   | 237.1851 | 237.1851 |
| 825 | M349T39  | 6.019958 | 2.589754 | 2.802035 | 0.047891 | 0.354971 | UP   | 349.2373 | 349.2371 |
| 826 | M338T39_ | 6.109293 | 2.611006 | 2.718517 | 0.047892 | 0.354971 | UP   | 338.2686 | 338.2644 |
| 827 | M315T30_ | 3.178611 | 1.668396 | 2.417238 | 0.047914 | 0.354971 | UP   | 314.7579 | 314.7576 |
| 828 | M405T10_ | 3.48153  | 1.799721 | 2.444906 | 0.04794  | 0.354971 | UP   | 404.7862 | 404.7858 |
| 829 | M323T35_ | 16.18336 | 4.01644  | 2.811063 | 0.047995 | 0.354972 | UP   | 323.2582 | 323.2582 |
| 830 | M482T32_ | 4.083334 | -2.02975 | -2.6675  | 0.0481   | 0.354972 | DOWN | 482.3606 | 482.3597 |
| 831 | M383T31_ | 40.27606 | 5.331851 | 2.813408 | 0.048105 | 0.354973 | UP   | 383.1375 | 383.1373 |
| 832 | M1449T43 | 3.860719 | 1.948869 | 2.544572 | 0.048137 | 0.354973 | UP   | 1449.004 | 1449.001 |
| 833 | M519T33  | 7.532404 | 2.91311  | 2.755448 | 0.04815  | 0.354973 | UP   | 519.097  | 519.097  |
| 834 | M563T26  | 5.377692 | 2.426987 | 2.529879 | 0.048212 | 0.354973 | UP   | 562.8695 | 562.8684 |
| 835 | M335T25_ | 22.65937 | 4.502036 | 2.805386 | 0.048261 | 0.354974 | UP   | 335.2221 | 335.222  |
| 836 | M379T25  | 112.6552 | 6.81577  | 2.810509 | 0.048291 | 0.354974 | UP   | 379.212  | 379.2117 |
| 837 | M492T32  | 2.012615 | -1.00907 | -2.50184 | 0.048296 | 0.354974 | DOWN | 492.3458 | 492.3454 |
| 838 | M606T27_ | 11.17709 | -3.48247 | -2.78943 | 0.048322 | 0.354974 | DOWN | 606.2339 | 606.2335 |
| 839 | M319T24  | 10.85324 | 3.440054 | 2.775148 | 0.048486 | 0.354976 | UP   | 319.227  | 319.2268 |
| 840 | M778T43_ | 1.555951 | 0.637796 | 2.339395 | 0.048487 | 0.354976 | UP   | 778.0467 | 778.0453 |
| 841 | M307T14  | 14.63524 | 3.871374 | 2.761076 | 0.048518 | 0.354976 | UP   | 307.0743 | 307.0742 |
| 842 | M485T33  | 5.434614 | 2.442178 | 2.681424 | 0.048593 | 0.354976 | UP   | 485.3476 | 485.3468 |
| 843 | M565T23  | 71.74216 | 6.164749 | 2.801171 | 0.048732 | 0.354978 | UP   | 565.2034 | 565.2031 |
| 844 | M381T31_ | 24.463   | 4.61253  | 2.789334 | 0.048755 | 0.354978 | UP   | 381.1406 | 381.1403 |
| 845 | M415T24_ | 26.53905 | 4.730045 | 2.800573 | 0.048766 | 0.354978 | UP   | 415.2522 | 415.252  |

|     |          |          |          |          |          |          |      |          |          |
|-----|----------|----------|----------|----------|----------|----------|------|----------|----------|
| 846 | M616T44  | 3.958578 | -1.98498 | -2.79082 | 0.048797 | 0.354978 | DOWN | 616.4282 | 616.4271 |
| 847 | M528T44_ | 1.435355 | -0.52141 | -2.47346 | 0.048823 | 0.354978 | DOWN | 528.3015 | 528.3007 |
| 848 | M692T31  | 50.3331  | 5.653436 | 2.798927 | 0.048853 | 0.354979 | UP   | 692.3702 | 692.3698 |
| 849 | M606T27_ | 11.49659 | -3.52313 | -2.79029 | 0.048938 | 0.354979 | DOWN | 606.2381 | 606.2381 |
| 850 | M709T26  | 5.592977 | 2.483616 | 2.41972  | 0.049016 | 0.35498  | UP   | 708.8    | 708.7995 |
| 851 | M539T34  | 32.82869 | 5.036885 | 2.789108 | 0.049166 | 0.354981 | UP   | 539.0301 | 539.03   |
| 852 | M522T31_ | 17.57179 | 4.135189 | 2.785762 | 0.049218 | 0.354981 | UP   | 522.0805 | 522.0804 |
| 853 | M491T42  | 1.530954 | -0.61443 | -2.46444 | 0.049277 | 0.354982 | DOWN | 491.0812 | 491.08   |
| 854 | M372T31  | 4.753754 | 2.249067 | 2.587763 | 0.049332 | 0.354982 | UP   | 372.1501 | 372.1497 |
| 855 | M347T39_ | 58.01317 | 5.858309 | 2.78737  | 0.049432 | 0.354983 | UP   | 347.2582 | 347.2582 |
| 856 | M481T43_ | 1.350581 | 0.43358  | 2.332418 | 0.049665 | 0.354985 | UP   | 480.6823 | 480.6814 |
| 857 | M219T39  | 11.18251 | 3.483172 | 2.768575 | 0.04968  | 0.354985 | UP   | 219.1743 | 219.1742 |
| 858 | M200T31_ | 49.38446 | 5.625985 | 2.781237 | 0.04971  | 0.354985 | UP   | 199.6039 | 199.6038 |
| 859 | M393T27_ | 11.85317 | 3.567201 | 2.778625 | 0.049846 | 0.354986 | UP   | 393.1728 | 393.1725 |
| 860 | M374T26  | 3.336921 | 1.738517 | 2.326119 | 0.049919 | 0.354987 | UP   | 374.1419 | 374.1413 |
| 861 | M445T27  | 2.256005 | 1.17377  | 2.52296  | 0.049938 | 0.354987 | UP   | 445.2547 | 445.2546 |
| 862 | M294T34  | 26.7549  | 4.741731 | 2.773303 | 0.050138 | 0.354989 | UP   | 294.1783 | 294.1782 |
| 863 | M747T29  | 3.448193 | 1.78584  | 2.403284 | 0.050144 | 0.354989 | UP   | 747.1941 | 747.1938 |
| 864 | M315T37  | 3.843252 | 1.942328 | 2.753427 | 0.050218 | 0.354989 | UP   | 315.2321 | 315.232  |
| 865 | M265T3   | 86.67729 | 6.437582 | 2.771202 | 0.050262 | 0.35499  | UP   | 264.8729 | 264.8728 |
| 866 | M627T23  | 4.090351 | 2.032225 | 2.587704 | 0.050297 | 0.35499  | UP   | 627.3265 | 627.3258 |
| 867 | M347T39_ | 44.754   | 5.483945 | 2.769862 | 0.05032  | 0.35499  | UP   | 347.2581 | 347.258  |
| 868 | M243T23  | 2.389648 | 1.256798 | 2.441455 | 0.050337 | 0.35499  | UP   | 243.1592 | 243.1592 |
| 869 | M534T33_ | 47.5822  | 5.57235  | 2.766195 | 0.05038  | 0.35499  | UP   | 534.1246 | 534.1242 |
| 870 | M339T24  | 34.48792 | 5.108019 | 2.767712 | 0.050436 | 0.354991 | UP   | 339.217  | 339.2169 |
| 871 | M663T26  | 98.53139 | 6.622512 | 2.766904 | 0.050491 | 0.354991 | UP   | 663.2294 | 663.2289 |
| 872 | M331T22_ | 3.679533 | -1.87952 | -2.61624 | 0.050533 | 0.354992 | DOWN | 331.1102 | 331.11   |
| 873 | M379T26_ | 27.07616 | 4.758951 | 2.765001 | 0.05055  | 0.354992 | UP   | 379.212  | 379.2118 |
| 874 | M328T11  | 3.327075 | 1.734254 | 2.645337 | 0.050604 | 0.354992 | UP   | 328.1996 | 328.1986 |
| 875 | M409T3   | 14.56718 | 3.86465  | 2.762615 | 0.050657 | 0.354992 | UP   | 408.7876 | 408.7875 |
| 876 | M786T30  | 2.568787 | -1.36109 | -2.36876 | 0.050662 | 0.354993 | DOWN | 786.1927 | 786.1923 |
| 877 | M536T31  | 57.01241 | 5.833204 | 2.762687 | 0.050683 | 0.354993 | UP   | 536.1029 | 536.1025 |
| 878 | M778T37  | 237.3698 | 7.890993 | 2.762127 | 0.050737 | 0.354993 | UP   | 778.0323 | 778.032  |
| 879 | M304T39  | 9.165981 | 3.196289 | 2.760521 | 0.050739 | 0.354993 | UP   | 304.2354 | 304.2352 |
| 880 | M411T44  | 2.281879 | 1.190222 | 2.655975 | 0.05078  | 0.354993 | UP   | 411.2305 | 411.2303 |
| 881 | M549T44_ | 1.374504 | 0.458911 | 2.304914 | 0.050795 | 0.354993 | UP   | 549.4015 | 549.4009 |
| 882 | M597T44  | 8.306915 | -3.05431 | -2.74032 | 0.050808 | 0.354994 | DOWN | 597.3828 | 597.3824 |
| 883 | M305T35  | 10.69136 | 3.418373 | 2.738724 | 0.050814 | 0.354994 | UP   | 305.2478 | 305.2478 |
| 884 | M249T24_ | 27.5014  | 4.781433 | 2.759187 | 0.050869 | 0.354994 | UP   | 249.1487 | 249.1486 |
| 885 | M284T22  | 3.058283 | -1.61272 | -2.62669 | 0.050967 | 0.354995 | DOWN | 284.1172 | 284.1077 |
| 886 | M181T34  | 24.34007 | 4.605261 | 2.755998 | 0.050971 | 0.354995 | UP   | 181.0496 | 181.0492 |
| 887 | M519T31_ | 5.05868  | -2.33876 | -2.64082 | 0.051006 | 0.354995 | DOWN | 519.3248 | 519.3237 |
| 888 | M604T27_ | 9.644812 | -3.26975 | -2.70198 | 0.051015 | 0.354995 | DOWN | 604.2399 | 604.2394 |
| 889 | M352T39_ | 56.79868 | 5.827786 | 2.756177 | 0.051018 | 0.354995 | UP   | 352.2848 | 352.2847 |
| 890 | M336T37_ | 113.9792 | 6.832627 | 2.755279 | 0.051097 | 0.354996 | UP   | 335.6684 | 335.6684 |
| 891 | M294T11  | 22.31507 | 4.479946 | 2.747412 | 0.051106 | 0.354996 | UP   | 294.0431 | 294.0423 |
| 892 | M228T14_ | 14.27084 | 3.834999 | 2.727914 | 0.051117 | 0.354996 | UP   | 228.1312 | 228.1312 |

|     |          |          |          |          |          |          |      |          |          |
|-----|----------|----------|----------|----------|----------|----------|------|----------|----------|
| 893 | M676T29_ | 6.046789 | -2.59617 | -2.62733 | 0.051162 | 0.354996 | DOWN | 676.2371 | 676.2367 |
| 894 | M338T34_ | 64.26625 | 6.005989 | 2.75289  | 0.051185 | 0.354996 | UP   | 338.2692 | 338.2691 |
| 895 | M290T35  | 2.546009 | -1.34824 | -2.33434 | 0.05121  | 0.354997 | DOWN | 290.248  | 290.2478 |
| 896 | M591T31_ | 315.12   | 8.299758 | 2.752753 | 0.051229 | 0.354997 | UP   | 591.007  | 591.007  |
| 897 | M435T31_ | 3.804246 | 1.927611 | 2.32029  | 0.051281 | 0.354997 | UP   | 435.027  | 435.0268 |
| 898 | M345T36  | 1.79552  | -0.8444  | -2.398   | 0.051307 | 0.354997 | DOWN | 345.1826 | 345.1825 |
| 899 | M420T10_ | 2.639344 | 1.40018  | 2.347067 | 0.051344 | 0.354997 | UP   | 420.2964 | 420.2954 |
| 900 | M587T31  | 23.91887 | 4.580077 | 2.745017 | 0.051344 | 0.354998 | UP   | 587.0644 | 587.0632 |
| 901 | M566T33  | 53.98025 | 5.75436  | 2.748535 | 0.051392 | 0.354998 | UP   | 566.1146 | 566.1135 |
| 902 | M403T33_ | 1.459764 | -0.54574 | -2.34246 | 0.051459 | 0.354998 | DOWN | 403.3611 | 403.3607 |
| 903 | M467T27_ | 22.07986 | 4.464659 | 2.73588  | 0.051607 | 0.354999 | UP   | 467.0452 | 467.0446 |
| 904 | M649T31  | 10.85181 | 3.439864 | 2.6396   | 0.051608 | 0.354999 | UP   | 649.0352 | 649.0348 |
| 905 | M242T23_ | 18.12118 | 4.179605 | 2.730762 | 0.051707 | 0.355    | UP   | 241.5733 | 241.5732 |
| 906 | M377T35_ | 56.80427 | 5.827928 | 2.743171 | 0.051728 | 0.355    | UP   | 377.1776 | 377.1775 |
| 907 | M151T38  | 3.701429 | 1.888082 | 2.727501 | 0.05176  | 0.355    | UP   | 151.1117 | 151.1116 |
| 908 | M343T23  | 8.89216  | 3.152534 | 2.736748 | 0.051794 | 0.355001 | UP   | 343.1207 | 343.1206 |
| 909 | M449T22_ | 3.688143 | 1.882895 | 2.346511 | 0.051814 | 0.355001 | UP   | 448.9286 | 448.9281 |
| 910 | M433T38  | 35.33746 | 5.143126 | 2.741246 | 0.051814 | 0.355001 | UP   | 433.1672 | 433.1671 |
| 911 | M503T33  | 6.058227 | 2.598896 | 2.655284 | 0.051838 | 0.355001 | UP   | 503.3775 | 503.3768 |
| 912 | M716T31  | 61.83254 | -5.95029 | -2.73784 | 0.052011 | 0.355002 | DOWN | 716.172  | 716.1715 |
| 913 | M491T24_ | 3.821155 | 1.934009 | 2.338989 | 0.052028 | 0.355002 | UP   | 491.184  | 491.1836 |
| 914 | M739T31  | 101.7728 | 6.669208 | 2.735978 | 0.052116 | 0.355003 | UP   | 738.9379 | 738.9372 |
| 915 | M334T39_ | 142.1399 | 7.151167 | 2.734491 | 0.052193 | 0.355004 | UP   | 333.8379 | 333.8377 |
| 916 | M704T31_ | 2.230004 | -1.15705 | -2.28377 | 0.052241 | 0.355004 | DOWN | 704.1842 | 704.1826 |
| 917 | M425T22  | 1.873513 | -0.90575 | -2.34448 | 0.052314 | 0.355004 | DOWN | 425.0106 | 425.0103 |
| 918 | M395T21_ | 6.192658 | 2.630559 | 2.641649 | 0.052349 | 0.355005 | UP   | 395.207  | 395.2065 |
| 919 | M357T39_ | 55.03482 | 5.782273 | 2.731418 | 0.052359 | 0.355005 | UP   | 357.24   | 357.2398 |
| 920 | M791T31  | 3000.829 | 11.55115 | 2.73137  | 0.052369 | 0.355005 | UP   | 791.292  | 791.2916 |
| 921 | M335T38_ | 102.3261 | 6.67703  | 2.730912 | 0.052385 | 0.355005 | UP   | 335.0151 | 335.015  |
| 922 | M603T27  | 9.613877 | -3.26512 | -2.7209  | 0.052418 | 0.355005 | DOWN | 603.2461 | 603.2458 |
| 923 | M712T31  | 3.451231 | -1.78711 | -2.51715 | 0.052442 | 0.355005 | DOWN | 712.181  | 712.1767 |
| 924 | M518T31_ | 4.852386 | -2.27869 | -2.61811 | 0.052442 | 0.355005 | DOWN | 518.3216 | 518.3204 |
| 925 | M387T31_ | 2.867882 | -1.51999 | -2.50928 | 0.052464 | 0.355005 | DOWN | 387.0781 | 387.0774 |
| 926 | M431T25_ | 8.859246 | 3.147184 | 2.718396 | 0.052546 | 0.355006 | UP   | 431.1714 | 431.1711 |
| 927 | M308T36  | 15.53676 | 3.957614 | 2.726718 | 0.052551 | 0.355006 | UP   | 308.2304 | 308.2303 |
| 928 | M659T35_ | 5.969862 | 2.577698 | 2.699808 | 0.052561 | 0.355006 | UP   | 659.4774 | 659.4767 |
| 929 | M510T29  | 2.334217 | -1.22294 | -2.53762 | 0.052673 | 0.355007 | DOWN | 510.3178 | 510.317  |
| 930 | M154T32  | 4.078101 | -2.0279  | -2.68373 | 0.052722 | 0.355007 | DOWN | 153.9483 | 153.9482 |
| 931 | M631T29_ | 15.16626 | -3.92279 | -2.70063 | 0.052764 | 0.355007 | DOWN | 631.2569 | 631.2562 |
| 932 | M333T39_ | 226.8499 | 7.825594 | 2.72292  | 0.052827 | 0.355008 | UP   | 333.2428 | 333.2427 |
| 933 | M654T29  | 25.01739 | -4.64486 | -2.70482 | 0.052858 | 0.355008 | DOWN | 654.2553 | 654.2552 |
| 934 | M1208T44 | 3.89013  | 1.959818 | 2.353854 | 0.052963 | 0.355009 | UP   | 1207.74  | 1207.739 |
| 935 | M884T41  | 4.756506 | 2.249902 | 2.486244 | 0.053028 | 0.355009 | UP   | 884.165  | 884.1645 |
| 936 | M387T29_ | 5.728956 | 2.518272 | 2.63082  | 0.053062 | 0.35501  | UP   | 387.2937 | 387.2935 |
| 937 | M428T14_ | 18.01029 | 4.170749 | 2.707717 | 0.053076 | 0.35501  | UP   | 427.981  | 427.9808 |
| 938 | M389T25  | 29.28162 | 4.871924 | 2.71393  | 0.053104 | 0.35501  | UP   | 389.1414 | 389.1412 |
| 939 | M376T31  | 4.252052 | 2.088159 | 2.676969 | 0.053186 | 0.35501  | UP   | 376.1501 | 376.1499 |

|     |          |          |          |          |          |          |      |          |          |
|-----|----------|----------|----------|----------|----------|----------|------|----------|----------|
| 940 | M695T31_ | 52.06505 | 5.702243 | 2.714711 | 0.053209 | 0.355011 | UP   | 695.3629 | 695.3624 |
| 941 | M471T21_ | 2.625743 | 1.392726 | 2.444312 | 0.053224 | 0.355011 | UP   | 471.1943 | 471.1929 |
| 942 | M1446T44 | 3.408051 | 1.768947 | 2.307454 | 0.053235 | 0.355011 | UP   | 1445.971 | 1445.97  |
| 943 | M475T33_ | 17.13926 | 4.099233 | 2.685824 | 0.053276 | 0.355011 | UP   | 475.0865 | 475.0864 |
| 944 | M486T33  | 6.316914 | 2.65922  | 2.683534 | 0.053282 | 0.355011 | UP   | 486.3507 | 486.3503 |
| 945 | M339T21  | 253.9016 | 7.988126 | 2.713619 | 0.053337 | 0.355011 | UP   | 339.2536 | 339.2532 |
| 946 | M598T43  | 1.706297 | 0.770869 | 2.316765 | 0.053338 | 0.355011 | UP   | 598.4889 | 598.4881 |
| 947 | M917T44  | 3.599936 | 1.847971 | 2.458203 | 0.053381 | 0.355012 | UP   | 916.5994 | 916.5992 |
| 948 | M331T38  | 298.7753 | 8.222917 | 2.712164 | 0.053416 | 0.355012 | UP   | 331.484  | 331.4839 |
| 949 | M161T39  | 9.958713 | 3.315959 | 2.710829 | 0.053445 | 0.355012 | UP   | 161.096  | 161.0959 |
| 950 | M598T9_1 | 5.943173 | 2.571233 | 2.625203 | 0.053634 | 0.355013 | UP   | 598.361  | 598.3607 |
| 951 | M1055T44 | 1.750438 | 0.807716 | 2.28297  | 0.053645 | 0.355013 | UP   | 1054.775 | 1054.773 |
| 952 | M1362T43 | 2.458419 | 1.297731 | 2.289699 | 0.053648 | 0.355013 | UP   | 1361.955 | 1361.953 |
| 953 | M856T33  | 2.038742 | 1.027679 | 2.267004 | 0.05366  | 0.355014 | UP   | 855.5884 | 855.5873 |
| 954 | M512T20  | 3.483633 | -1.80059 | -2.65283 | 0.053737 | 0.355014 | DOWN | 512.2347 | 512.2341 |
| 955 | M560T31_ | 129.7539 | 7.019634 | 2.706056 | 0.053751 | 0.355014 | UP   | 560.1035 | 560.1032 |
| 956 | M306T23_ | 5.314472 | 2.409926 | 2.346006 | 0.053879 | 0.355015 | UP   | 305.545  | 305.5447 |
| 957 | M579T37  | 513.1638 | 9.003276 | 2.70371  | 0.053887 | 0.355015 | UP   | 579.0975 | 579.0974 |
| 958 | M1001T44 | 2.610455 | 1.384301 | 2.319173 | 0.05391  | 0.355015 | UP   | 1000.502 | 1000.501 |
| 959 | M551T37  | 192.5829 | 7.589336 | 2.702819 | 0.053935 | 0.355015 | UP   | 551.1027 | 551.1025 |
| 960 | M501T37  | 9.80821  | -3.29399 | -2.68686 | 0.053938 | 0.355015 | DOWN | 501.0859 | 501.0856 |
| 961 | M374T31_ | 255.156  | 7.995236 | 2.702395 | 0.053959 | 0.355015 | UP   | 373.6479 | 373.6477 |
| 962 | M416T32_ | 6.685232 | 2.740978 | 2.678463 | 0.053973 | 0.355016 | UP   | 416.1733 | 416.1729 |
| 963 | M218T24  | 31.01158 | 4.954735 | 2.698368 | 0.05399  | 0.355016 | UP   | 217.5851 | 217.5849 |
| 964 | M337T39_ | 268.152  | 8.066907 | 2.70135  | 0.054018 | 0.355016 | UP   | 336.6873 | 336.6872 |
| 965 | M336T37_ | 13.45008 | 3.749543 | 2.698999 | 0.054025 | 0.355016 | UP   | 336.2528 | 336.2516 |
| 966 | M366T11_ | 2.522858 | 1.335059 | 2.415038 | 0.054077 | 0.355016 | UP   | 366.2466 | 366.2454 |
| 967 | M636T31  | 78.73548 | 6.298942 | 2.69972  | 0.054098 | 0.355016 | UP   | 636.0055 | 636.0051 |
| 968 | M385T31_ | 3.814911 | 1.931649 | 2.266781 | 0.054183 | 0.355017 | UP   | 385.0649 | 385.0643 |
| 969 | M152T37  | 13.51303 | 3.756279 | 2.69172  | 0.054326 | 0.355018 | UP   | 152.115  | 152.115  |
| 970 | M517T37_ | 3.349594 | 1.743986 | 2.256181 | 0.054345 | 0.355018 | UP   | 517.05   | 517.0496 |
| 971 | M364T23  | 7.335536 | 2.874902 | 2.681579 | 0.054364 | 0.355018 | UP   | 364.2204 | 364.2202 |
| 972 | M1097T44 | 1.805038 | 0.852029 | 2.254153 | 0.054388 | 0.355018 | UP   | 1096.794 | 1096.792 |
| 973 | M335T29_ | 4.688438 | 2.229107 | 2.62817  | 0.054425 | 0.355019 | UP   | 335.222  | 335.2218 |
| 974 | M335T28  | 11.47986 | 3.521033 | 2.692207 | 0.054447 | 0.355019 | UP   | 335.2222 | 335.222  |
| 975 | M402T20  | 3.388097 | -1.76048 | -2.52152 | 0.054543 | 0.355019 | DOWN | 402.1262 | 402.1253 |
| 976 | M213T11_ | 1.93794  | 0.954524 | 2.288215 | 0.054594 | 0.35502  | UP   | 213.1488 | 213.1486 |
| 977 | M356T38  | 20.20576 | 4.336695 | 2.689485 | 0.054604 | 0.35502  | UP   | 356.2277 | 356.2277 |
| 978 | M530T26  | 17.72597 | 4.147793 | 2.672045 | 0.054626 | 0.35502  | UP   | 530.0929 | 530.0925 |
| 979 | M595T31_ | 33.64012 | -5.07211 | -2.68741 | 0.054668 | 0.35502  | DOWN | 595.233  | 595.2324 |
| 980 | M180T39  | 18.8162  | 4.233904 | 2.685712 | 0.054678 | 0.35502  | UP   | 180.11   | 180.1098 |
| 981 | M580T37  | 234.2462 | 7.871882 | 2.689304 | 0.054697 | 0.35502  | UP   | 580.1007 | 580.1006 |
| 982 | M376T33  | 10.68664 | 3.417736 | 2.683674 | 0.054853 | 0.355021 | UP   | 376.1654 | 376.1654 |
| 983 | M367T24  | 6.686188 | 2.741184 | 2.664595 | 0.054874 | 0.355021 | UP   | 367.2482 | 367.2481 |
| 984 | M756T43_ | 1.523572 | 0.607458 | 2.261534 | 0.054881 | 0.355021 | UP   | 756.0334 | 756.0321 |
| 985 | M323T32_ | 4.80704  | 2.265149 | 2.665629 | 0.054891 | 0.355021 | UP   | 323.222  | 323.222  |
| 986 | M243T22  | 2.289004 | -1.19472 | -2.43065 | 0.054905 | 0.355022 | DOWN | 243.0904 | 243.0899 |

|      |          |          |          |          |          |          |      |          |          |
|------|----------|----------|----------|----------|----------|----------|------|----------|----------|
| 987  | M436T21  | 2.183154 | -1.12641 | -2.3761  | 0.054916 | 0.355022 | DOWN | 436.306  | 436.3057 |
| 988  | M269T26_ | 4.566895 | 2.191214 | 2.601489 | 0.055011 | 0.355022 | UP   | 269.2115 | 269.2113 |
| 989  | M378T19  | 22.05618 | 4.463111 | 2.665442 | 0.055078 | 0.355023 | UP   | 378.1001 | 378.1001 |
| 990  | M461T17  | 12.55465 | 3.65015  | 2.664422 | 0.05509  | 0.355023 | UP   | 460.8916 | 460.8915 |
| 991  | M514T31  | 7.509575 | 2.908731 | 2.563423 | 0.055121 | 0.355023 | UP   | 514.0226 | 514.0222 |
| 992  | M259T33  | 124.8443 | 6.963986 | 2.680316 | 0.055205 | 0.355023 | UP   | 258.5603 | 258.5603 |
| 993  | M224T4   | 30.98347 | 4.953427 | 2.678259 | 0.055229 | 0.355024 | UP   | 223.9802 | 223.9799 |
| 994  | M655T31_ | 430.4843 | 8.749817 | 2.679688 | 0.055246 | 0.355024 | UP   | 655.4775 | 655.4771 |
| 995  | M212T10_ | 143.0565 | 7.160441 | 2.679338 | 0.055262 | 0.355024 | UP   | 212.0768 | 212.0766 |
| 996  | M241T10_ | 10.15144 | 3.343612 | 2.669668 | 0.055287 | 0.355024 | UP   | 241.2037 | 241.2037 |
| 997  | M364T31_ | 6.181279 | 2.627905 | 2.500175 | 0.055426 | 0.355025 | UP   | 364.285  | 364.2846 |
| 998  | M490T27_ | 4.622182 | 2.208574 | 2.669645 | 0.055466 | 0.355025 | UP   | 490.2954 | 490.2951 |
| 999  | M258T31  | 174.2346 | 7.444888 | 2.672847 | 0.055635 | 0.355026 | UP   | 257.5524 | 257.5521 |
| 1000 | M803T42  | 1.778714 | 0.830834 | 2.306189 | 0.055647 | 0.355026 | UP   | 802.59   | 802.589  |
| 1001 | M351T34  | 20.04571 | 4.325221 | 2.664837 | 0.055831 | 0.355027 | UP   | 351.2533 | 351.2532 |
| 1002 | M305T30_ | 3.762977 | 1.911874 | 2.564067 | 0.055958 | 0.355028 | UP   | 305.2115 | 305.2114 |
| 1003 | M792T31  | 33.32485 | 5.058526 | 2.662368 | 0.056007 | 0.355028 | UP   | 792.2952 | 792.2946 |
| 1004 | M215T2   | 15.4885  | -3.95313 | -2.66524 | 0.056007 | 0.355028 | DOWN | 214.9171 | 214.9171 |
| 1005 | M607T24  | 19.54123 | 4.288449 | 2.648455 | 0.056033 | 0.355029 | UP   | 607.0635 | 607.0631 |
| 1006 | M757T44_ | 13.27571 | 3.730717 | 2.656549 | 0.056067 | 0.355029 | UP   | 757.2734 | 757.2718 |
| 1007 | M633T29  | 11.97683 | -3.58217 | -2.59963 | 0.056202 | 0.35503  | DOWN | 633.2522 | 633.2516 |
| 1008 | M337T39_ | 47.31088 | 5.5641   | 2.661426 | 0.056294 | 0.35503  | UP   | 337.2645 | 337.2642 |
| 1009 | M251T18  | 3.374787 | -1.7548  | -2.57439 | 0.056296 | 0.35503  | DOWN | 251.06   | 251.0598 |
| 1010 | M492T24_ | 3.907686 | 1.966314 | 2.307271 | 0.056296 | 0.35503  | UP   | 492.1876 | 492.1868 |
| 1011 | M579T38  | 152.6477 | 7.254062 | 2.661216 | 0.05631  | 0.35503  | UP   | 579.0976 | 579.0975 |
| 1012 | M193T21  | 6.840904 | -2.77419 | -2.63815 | 0.056322 | 0.35503  | DOWN | 192.9762 | 192.9759 |
| 1013 | M366T17  | 3.385171 | -1.75923 | -2.45306 | 0.056393 | 0.355031 | DOWN | 365.9958 | 365.9949 |
| 1014 | M349T25  | 34.75121 | 5.118991 | 2.658191 | 0.056395 | 0.355031 | UP   | 349.2014 | 349.2013 |
| 1015 | M689T31  | 75.48323 | 6.238084 | 2.659031 | 0.056427 | 0.355031 | UP   | 689.3714 | 689.3711 |
| 1016 | M598T31_ | 49.19673 | -5.62049 | -2.65691 | 0.056481 | 0.355031 | DOWN | 598.2247 | 598.224  |
| 1017 | M441T18_ | 4.059496 | 2.021301 | 2.610513 | 0.056538 | 0.355032 | UP   | 441.2504 | 441.2502 |
| 1018 | M738T29  | 2.914163 | -1.54308 | -2.32522 | 0.05656  | 0.355032 | DOWN | 738.1749 | 738.1747 |
| 1019 | M353T27  | 3.237093 | 1.694699 | 2.645698 | 0.056592 | 0.355032 | UP   | 353.2327 | 353.2324 |
| 1020 | M635T31  | 74.1694  | 6.212752 | 2.653092 | 0.056736 | 0.355033 | UP   | 635.0175 | 635.0169 |
| 1021 | M483T39  | 12.23244 | -3.61264 | -2.64181 | 0.056782 | 0.355033 | DOWN | 483.2287 | 483.2287 |
| 1022 | M225T18  | 3.478382 | -1.79842 | -2.53817 | 0.056909 | 0.355034 | DOWN | 225.046  | 225.046  |
| 1023 | M249T24_ | 29.72344 | 4.893529 | 2.650783 | 0.056913 | 0.355034 | UP   | 249.1487 | 249.1487 |
| 1024 | M654T31  | 1342.581 | 10.39079 | 2.649811 | 0.056993 | 0.355034 | UP   | 654.474  | 654.4737 |
| 1025 | M378T33  | 1.690371 | -0.75734 | -2.23799 | 0.057009 | 0.355034 | DOWN | 378.1658 | 378.1655 |
| 1026 | M1234T44 | 7.730658 | 2.950591 | 2.514041 | 0.057038 | 0.355035 | UP   | 1233.734 | 1233.733 |
| 1027 | M295T31_ | 4.327002 | 2.113368 | 2.635273 | 0.057047 | 0.355035 | UP   | 295.2271 | 295.2269 |
| 1028 | M349T31_ | 48.0201  | 5.585567 | 2.648263 | 0.057055 | 0.355035 | UP   | 349.2377 | 349.2374 |
| 1029 | M375T11  | 2.321412 | 1.215003 | 2.221926 | 0.057056 | 0.355035 | UP   | 374.9701 | 374.9697 |
| 1030 | M578T24  | 19.86112 | 4.311875 | 2.630827 | 0.057076 | 0.355035 | UP   | 578.1142 | 578.1138 |
| 1031 | M563T37  | 76.15163 | 6.250803 | 2.647174 | 0.057146 | 0.355035 | UP   | 563.1252 | 563.125  |
| 1032 | M201T21  | 2.316614 | -1.21202 | -2.23468 | 0.057187 | 0.355035 | DOWN | 201.0465 | 201.0464 |
| 1033 | M468T24  | 4.733601 | 2.242938 | 2.594621 | 0.057234 | 0.355036 | UP   | 468.1763 | 468.1762 |

|      |          |          |          |          |          |          |      |          |          |
|------|----------|----------|----------|----------|----------|----------|------|----------|----------|
| 1034 | M1143T19 | 3.969652 | 1.989012 | 2.295966 | 0.057257 | 0.355036 | UP   | 1142.749 | 1142.749 |
| 1035 | M773T33  | 4.443657 | 2.151747 | 2.405925 | 0.057296 | 0.355036 | UP   | 772.5794 | 772.5792 |
| 1036 | M808T44  | 6.780938 | -2.76148 | -2.63292 | 0.057331 | 0.355036 | DOWN | 807.6754 | 807.6744 |
| 1037 | M430T37  | 1.242684 | -0.31346 | -2.22324 | 0.057337 | 0.355036 | DOWN | 430.389  | 430.3883 |
| 1038 | M559T30_ | 4.451114 | 2.154166 | 2.23574  | 0.057358 | 0.355036 | UP   | 558.9988 | 558.9984 |
| 1039 | M340T12_ | 244.0909 | 7.931275 | 2.643337 | 0.057378 | 0.355037 | UP   | 340.2024 | 340.2021 |
| 1040 | M599T24_ | 4.547885 | 2.185196 | 2.387729 | 0.05753  | 0.355037 | UP   | 599.072  | 599.0719 |
| 1041 | M427T26  | 3.239553 | 1.695795 | 2.311431 | 0.057586 | 0.355038 | UP   | 427.0621 | 427.0619 |
| 1042 | M337T26  | 14.54189 | 3.862143 | 2.636361 | 0.057616 | 0.355038 | UP   | 337.2377 | 337.2377 |
| 1043 | M434T37  | 7.058553 | 2.819372 | 2.635734 | 0.057721 | 0.355038 | UP   | 434.1704 | 434.1703 |
| 1044 | M303T22_ | 4.212943 | -2.07483 | -2.58325 | 0.057842 | 0.355039 | DOWN | 303.1    | 303.0997 |
| 1045 | M406T27_ | 8.173819 | 3.03101  | 2.604812 | 0.057887 | 0.355039 | UP   | 406.1399 | 406.1395 |
| 1046 | M910T31  | 59.38908 | 5.892126 | 2.632953 | 0.057913 | 0.35504  | UP   | 910.2317 | 910.2313 |
| 1047 | M384T34  | 36.62597 | 5.194795 | 2.631823 | 0.058036 | 0.35504  | UP   | 384.2748 | 384.2746 |
| 1048 | M593T33  | 406.1411 | 8.665837 | 2.632129 | 0.058055 | 0.35504  | UP   | 593.0225 | 593.0223 |
| 1049 | M185T3   | 17.82069 | 4.155481 | 2.631455 | 0.058058 | 0.35504  | UP   | 184.9856 | 184.9856 |
| 1050 | M790T30  | 47.40113 | -5.56685 | -2.63055 | 0.058076 | 0.355041 | DOWN | 790.1883 | 790.188  |
| 1051 | M356T24_ | 10.0287  | 3.326063 | 2.587014 | 0.058087 | 0.355041 | UP   | 356.28   | 356.2795 |
| 1052 | M442T33  | 7.049596 | 2.817541 | 2.581691 | 0.058263 | 0.355042 | UP   | 442.3246 | 442.3239 |
| 1053 | M739T44  | 2.322387 | 1.215608 | 2.206336 | 0.058415 | 0.355042 | UP   | 739.3572 | 739.3563 |
| 1054 | M633T30  | 9.974165 | -3.3182  | -2.58802 | 0.058439 | 0.355043 | DOWN | 633.2723 | 633.2719 |
| 1055 | M619T44  | 4.440679 | -2.15078 | -2.59491 | 0.058515 | 0.355043 | DOWN | 619.4276 | 619.4269 |
| 1056 | M252T18  | 5.162686 | -2.36812 | -2.52645 | 0.058545 | 0.355043 | DOWN | 252.0584 | 252.0577 |
| 1057 | M1010T44 | 1.656308 | 0.727971 | 2.203246 | 0.0587   | 0.355044 | UP   | 1009.745 | 1009.743 |
| 1058 | M1445T44 | 7.45441  | 2.898094 | 2.518279 | 0.058702 | 0.355044 | UP   | 1444.972 | 1444.97  |
| 1059 | M288T32_ | 4.182791 | 2.064466 | 2.565907 | 0.058703 | 0.355044 | UP   | 288.1426 | 288.1425 |
| 1060 | M448T19_ | 2.139784 | 1.097465 | 2.263115 | 0.058734 | 0.355044 | UP   | 448.2181 | 448.2172 |
| 1061 | M753T41  | 8.013591 | -3.00245 | -2.61917 | 0.058796 | 0.355045 | DOWN | 753.4391 | 753.4387 |
| 1062 | M437T39  | 8.813898 | 3.13978  | 2.598842 | 0.058866 | 0.355045 | UP   | 437.1831 | 437.1827 |
| 1063 | M285T33  | 3.969907 | 1.989105 | 2.595338 | 0.058922 | 0.355045 | UP   | 285.2216 | 285.2216 |
| 1064 | M560T33  | 17.66567 | 4.142877 | 2.614241 | 0.058983 | 0.355046 | UP   | 560.1239 | 560.1237 |
| 1065 | M371T30_ | 15.18534 | 3.924607 | 2.61537  | 0.058984 | 0.355046 | UP   | 371.2197 | 371.2194 |
| 1066 | M319T33  | 29.82602 | 4.898499 | 2.616257 | 0.059008 | 0.355046 | UP   | 319.2273 | 319.2272 |
| 1067 | M265T22  | 20.15119 | 4.332793 | 2.614189 | 0.059081 | 0.355046 | UP   | 265.0718 | 265.0716 |
| 1068 | M740T32  | 20.30779 | -4.34396 | -2.60803 | 0.059091 | 0.355046 | DOWN | 740.1903 | 740.1896 |
| 1069 | M520T26  | 6.394151 | 2.676753 | 2.441704 | 0.059157 | 0.355047 | UP   | 520.0723 | 520.0711 |
| 1070 | M789T31  | 476.8872 | 8.897504 | 2.613262 | 0.059216 | 0.355047 | UP   | 789.2968 | 789.296  |
| 1071 | M323T31  | 4.202458 | 2.071233 | 2.208268 | 0.059237 | 0.355047 | UP   | 323.0214 | 323.0213 |
| 1072 | M349T33  | 71.53495 | 6.160576 | 2.611983 | 0.059291 | 0.355047 | UP   | 349.2376 | 349.2375 |
| 1073 | M287T23  | 10.37315 | 3.374782 | 2.60114  | 0.059295 | 0.355047 | UP   | 287.1563 | 287.1561 |
| 1074 | M651T44  | 1.825251 | 0.868095 | 2.207757 | 0.0595   | 0.355048 | UP   | 651.3602 | 651.3596 |
| 1075 | M431T22_ | 2.887838 | 1.52999  | 2.276383 | 0.059561 | 0.355049 | UP   | 430.918  | 430.9174 |
| 1076 | M323T33_ | 6.344784 | 2.665571 | 2.566183 | 0.059572 | 0.355049 | UP   | 323.2495 | 323.2495 |
| 1077 | M382T21  | 6.307528 | 2.657075 | 2.597309 | 0.059727 | 0.35505  | UP   | 382.2311 | 382.2309 |
| 1078 | M568T42  | 1.297219 | 0.375422 | 2.201743 | 0.059761 | 0.35505  | UP   | 568.4003 | 568.3992 |
| 1079 | M444T23  | 102.3145 | 6.676867 | 2.603624 | 0.059802 | 0.35505  | UP   | 444.147  | 444.1468 |
| 1080 | M426T42  | 1.601983 | -0.67986 | -2.24919 | 0.059822 | 0.35505  | DOWN | 426.213  | 426.2126 |

|      |          |          |          |          |          |          |      |          |          |
|------|----------|----------|----------|----------|----------|----------|------|----------|----------|
| 1081 | M309T36  | 4.053939 | 2.019324 | 2.594021 | 0.059844 | 0.35505  | UP   | 309.2426 | 309.2425 |
| 1082 | M394T39_ | 38.84843 | 5.279784 | 2.597318 | 0.060172 | 0.355052 | UP   | 394.3065 | 394.3062 |
| 1083 | M337T19  | 14.00177 | 3.807537 | 2.556744 | 0.060179 | 0.355052 | UP   | 337.0736 | 337.0735 |
| 1084 | M541T44  | 2.524748 | 1.336139 | 2.518014 | 0.060214 | 0.355052 | UP   | 541.1504 | 541.1503 |
| 1085 | M337T15  | 71.31082 | 6.156049 | 2.596522 | 0.060246 | 0.355052 | UP   | 337.0736 | 337.0736 |
| 1086 | M521T22  | 3.718942 | 1.894892 | 2.187036 | 0.060251 | 0.355052 | UP   | 520.9135 | 520.9128 |
| 1087 | M275T39  | 8.114173 | 3.020444 | 2.572209 | 0.060301 | 0.355053 | UP   | 275.237  | 275.2369 |
| 1088 | M463T30  | 8.880261 | 3.150602 | 2.538276 | 0.060322 | 0.355053 | UP   | 463.1417 | 463.1413 |
| 1089 | M713T43_ | 1.425471 | 0.511439 | 2.193553 | 0.060342 | 0.355053 | UP   | 712.5087 | 712.5076 |
| 1090 | M547T44  | 2.438236 | 1.285838 | 2.239951 | 0.06042  | 0.355053 | UP   | 547.1444 | 547.1437 |
| 1091 | M580T44_ | 1.286985 | 0.363996 | 2.196062 | 0.060463 | 0.355053 | UP   | 579.9281 | 579.927  |
| 1092 | M312T44  | 2.04911  | 1.034998 | 2.376926 | 0.060499 | 0.355054 | UP   | 312.1704 | 312.1702 |
| 1093 | M534T33_ | 42.25748 | 5.401135 | 2.588705 | 0.060507 | 0.355054 | UP   | 534.1008 | 534.1006 |
| 1094 | M352T39_ | 30.18868 | 4.915936 | 2.586484 | 0.060628 | 0.355054 | UP   | 352.2846 | 352.2845 |
| 1095 | M323T33_ | 83.28751 | 6.380028 | 2.589645 | 0.060692 | 0.355055 | UP   | 322.5833 | 322.5832 |
| 1096 | M487T22  | 172.5223 | 7.430639 | 2.589334 | 0.060721 | 0.355055 | UP   | 486.9075 | 486.9071 |
| 1097 | M496T27_ | 5.210922 | 2.381539 | 2.48694  | 0.060737 | 0.355055 | UP   | 496.1644 | 496.164  |
| 1098 | M1361T43 | 2.390722 | 1.257446 | 2.255912 | 0.060764 | 0.355055 | UP   | 1360.951 | 1360.95  |
| 1099 | M271T33  | 2.884797 | 1.52847  | 2.5134   | 0.060794 | 0.355055 | UP   | 271.1542 | 271.1541 |
| 1100 | M202T27  | 4.880823 | 2.287124 | 2.521439 | 0.060984 | 0.355056 | UP   | 202.0819 | 202.0759 |
| 1101 | M279T17  | 3.037062 | 1.602676 | 2.442702 | 0.061027 | 0.355056 | UP   | 279.0793 | 279.0792 |
| 1102 | M285T39  | 4.866297 | 2.282824 | 2.580512 | 0.061037 | 0.355056 | UP   | 285.2214 | 285.2213 |
| 1103 | M794T9_1 | 10.59014 | -3.40465 | -2.50687 | 0.061089 | 0.355057 | DOWN | 794.0781 | 794.077  |
| 1104 | M410T29_ | 4.397492 | 2.136681 | 2.195395 | 0.061155 | 0.355057 | UP   | 409.5637 | 409.5631 |
| 1105 | M667T31  | 23.70089 | 4.566869 | 2.576833 | 0.061193 | 0.355057 | UP   | 667.3667 | 667.3665 |
| 1106 | M564T33_ | 66.54258 | 6.056206 | 2.579592 | 0.061327 | 0.355058 | UP   | 564.1189 | 564.118  |
| 1107 | M415T32_ | 4.510149 | 2.173175 | 2.460682 | 0.061509 | 0.355059 | UP   | 415.1764 | 415.176  |
| 1108 | M666T10  | 5.385951 | 2.429201 | 2.370145 | 0.061623 | 0.355059 | UP   | 665.9224 | 665.9217 |
| 1109 | M553T36_ | 20.62562 | 4.366365 | 2.569739 | 0.061738 | 0.35506  | UP   | 553.0818 | 553.0817 |
| 1110 | M421T31  | 2.778095 | 1.474096 | 2.462846 | 0.061837 | 0.35506  | UP   | 421.3292 | 421.3284 |
| 1111 | M377T35_ | 8.969644 | 3.165051 | 2.562022 | 0.06187  | 0.355061 | UP   | 377.1776 | 377.1775 |
| 1112 | M590T29_ | 13.36342 | -3.74022 | -2.54735 | 0.061897 | 0.355061 | DOWN | 590.243  | 590.2425 |
| 1113 | M674T29  | 13.47444 | -3.75215 | -2.53796 | 0.061941 | 0.355061 | DOWN | 674.24   | 674.24   |
| 1114 | M592T23_ | 2.202896 | 1.139401 | 2.284831 | 0.061942 | 0.355061 | UP   | 592.3851 | 592.3844 |
| 1115 | M800T42  | 1.639403 | 0.713171 | 2.209034 | 0.062027 | 0.355061 | UP   | 799.5583 | 799.5568 |
| 1116 | M371T37_ | 12.61806 | 3.657418 | 2.568396 | 0.062071 | 0.355062 | UP   | 371.1983 | 371.1982 |
| 1117 | M441T18_ | 62.72529 | 5.970975 | 2.566898 | 0.062124 | 0.355062 | UP   | 441.2755 | 441.2754 |
| 1118 | M494T37  | 13.88931 | -3.7959  | -2.55583 | 0.062136 | 0.355062 | DOWN | 494.1723 | 494.1719 |
| 1119 | M553T37  | 65.45544 | 6.032441 | 2.566738 | 0.062152 | 0.355062 | UP   | 553.1033 | 553.103  |
| 1120 | M450T43  | 1.761186 | 0.816547 | 2.463348 | 0.062153 | 0.355062 | UP   | 450.4305 | 450.4297 |
| 1121 | M187T31  | 6.113986 | 2.612113 | 2.557348 | 0.062357 | 0.355063 | UP   | 187.0767 | 187.0767 |
| 1122 | M416T25_ | 3.868896 | 1.951922 | 2.50317  | 0.06239  | 0.355063 | UP   | 416.2699 | 416.2696 |
| 1123 | M435T39  | 90.2901  | 6.496496 | 2.563033 | 0.062434 | 0.355063 | UP   | 435.1829 | 435.1826 |
| 1124 | M358T39  | 10.65707 | 3.413739 | 2.561655 | 0.062475 | 0.355064 | UP   | 358.2434 | 358.2432 |
| 1125 | M322T33_ | 5.983961 | 2.581101 | 2.552757 | 0.062488 | 0.355064 | UP   | 322.2461 | 322.246  |
| 1126 | M337T41  | 7.973834 | 2.995274 | 2.560551 | 0.062494 | 0.355064 | UP   | 337.274  | 337.2739 |
| 1127 | M309T37  | 48.96835 | 5.613778 | 2.56193  | 0.062508 | 0.355064 | UP   | 309.2426 | 309.2425 |



|      |           |          |          |          |          |          |      |          |          |
|------|-----------|----------|----------|----------|----------|----------|------|----------|----------|
| 1128 | M527T31_  | 42.12141 | 5.396482 | 2.557076 | 0.062537 | 0.355064 | UP   | 527.0707 | 527.0705 |
| 1129 | M339T17_  | 38.14182 | 5.253302 | 2.559397 | 0.062605 | 0.355064 | UP   | 339.0893 | 339.0891 |
| 1130 | M381T25_  | 18.90526 | 4.240716 | 2.555474 | 0.062832 | 0.355065 | UP   | 381.2277 | 381.2276 |
| 1131 | M282T14_  | 9.565194 | 3.257794 | 2.535937 | 0.062846 | 0.355065 | UP   | 282.0506 | 282.0506 |
| 1132 | M410T22_  | 25.39246 | 4.666328 | 2.551167 | 0.062873 | 0.355066 | UP   | 409.9989 | 409.9985 |
| 1133 | M1005T44_ | 2.358961 | 1.238151 | 2.187877 | 0.062918 | 0.355066 | UP   | 1004.501 | 1004.499 |
| 1134 | M437T32_  | 11.02251 | 3.462381 | 2.523095 | 0.063052 | 0.355066 | UP   | 437.1495 | 437.1495 |
| 1135 | M449T27_  | 2.37666  | 1.248935 | 2.241357 | 0.063065 | 0.355066 | UP   | 449.1621 | 449.1618 |
| 1136 | M373T24   | 14.18928 | 3.82673  | 2.545309 | 0.063182 | 0.355067 | UP   | 373.2781 | 373.2779 |
| 1137 | M618T22   | 3.809766 | 1.929702 | 2.166643 | 0.063246 | 0.355067 | UP   | 617.8753 | 617.8746 |
| 1138 | M369T25_  | 32.65085 | 5.029049 | 2.548741 | 0.063278 | 0.355067 | UP   | 369.2641 | 369.2637 |
| 1139 | M594T22_  | 7.012419 | 2.809912 | 2.396875 | 0.063288 | 0.355068 | UP   | 593.8511 | 593.8511 |
| 1140 | M382T22_  | 19.11146 | 4.256366 | 2.546857 | 0.063289 | 0.355068 | UP   | 382.2494 | 382.2491 |
| 1141 | M421T29   | 3.819397 | 1.933345 | 2.157168 | 0.0633   | 0.355068 | UP   | 420.5633 | 420.5631 |
| 1142 | M439T45_  | 1.25172  | 0.323912 | 2.171504 | 0.063374 | 0.355068 | UP   | 439.3359 | 439.3352 |
| 1143 | M352T12   | 2.069093 | 1.048998 | 2.208322 | 0.063396 | 0.355068 | UP   | 352.2487 | 352.2484 |
| 1144 | M379T35   | 3.323802 | 1.732835 | 2.509761 | 0.06344  | 0.355068 | UP   | 379.1779 | 379.1779 |
| 1145 | M393T2    | 1.971434 | -0.97925 | -2.28646 | 0.063546 | 0.355069 | DOWN | 392.8146 | 392.8143 |
| 1146 | M747T45   | 1.586427 | -0.66578 | -2.16789 | 0.063562 | 0.355069 | DOWN | 746.5901 | 746.5888 |
| 1147 | M448T32_  | 1.557296 | -0.63904 | -2.44871 | 0.063574 | 0.355069 | DOWN | 448.3194 | 448.319  |
| 1148 | M393T26_  | 3.505239 | 1.809513 | 2.514041 | 0.063617 | 0.355069 | UP   | 393.1577 | 393.1576 |
| 1149 | M361T37_  | 180.1223 | 7.492833 | 2.545297 | 0.063622 | 0.355069 | UP   | 360.7035 | 360.7032 |
| 1150 | M448T31   | 30.11475 | 4.912399 | 2.540287 | 0.063628 | 0.355069 | UP   | 447.7509 | 447.7504 |
| 1151 | M822T42_  | 1.583729 | 0.663325 | 2.164566 | 0.063677 | 0.355069 | UP   | 822.0733 | 822.0717 |
| 1152 | M1406T43  | 2.780194 | 1.475186 | 2.227    | 0.063796 | 0.35507  | UP   | 1405.981 | 1405.977 |
| 1153 | M262T31   | 4.005891 | 2.002123 | 2.151724 | 0.063806 | 0.35507  | UP   | 261.9799 | 261.9798 |
| 1154 | M630T29_  | 7.810526 | -2.96542 | -2.51128 | 0.063821 | 0.35507  | DOWN | 630.2534 | 630.2529 |
| 1155 | M293T33   | 9.657309 | 3.271621 | 2.518018 | 0.063912 | 0.35507  | UP   | 293.2114 | 293.2113 |
| 1156 | M442T18   | 23.35927 | 4.545923 | 2.537653 | 0.063973 | 0.355071 | UP   | 442.279  | 442.2787 |
| 1157 | M366T39   | 26.62183 | 4.734538 | 2.538153 | 0.064024 | 0.355071 | UP   | 366.3003 | 366.3002 |
| 1158 | M477T30   | 16.56214 | 4.049817 | 2.523436 | 0.064389 | 0.355073 | UP   | 477.0881 | 477.088  |
| 1159 | M471T9_2  | 2.562479 | -1.35754 | -2.23053 | 0.064438 | 0.355073 | DOWN | 471.3729 | 471.3719 |
| 1160 | M181T11   | 1.97567  | 0.982342 | 2.249692 | 0.06463  | 0.355074 | UP   | 181.0862 | 181.086  |
| 1161 | M309T20_  | 4.056916 | 2.020384 | 2.437725 | 0.064707 | 0.355074 | UP   | 309.0788 | 309.0787 |
| 1162 | M208T24   | 37.84959 | 5.242206 | 2.527582 | 0.064736 | 0.355074 | UP   | 208.105  | 208.1049 |
| 1163 | M393T29   | 9.759067 | 3.286743 | 2.486041 | 0.0648   | 0.355075 | UP   | 393.1363 | 393.1359 |
| 1164 | M414T25   | 7.68143  | 2.941375 | 2.520262 | 0.064846 | 0.355075 | UP   | 414.2491 | 414.249  |
| 1165 | M248T30_  | 4.844723 | 2.276414 | 2.229012 | 0.064871 | 0.355075 | UP   | 247.602  | 247.6015 |
| 1166 | M292T28_  | 6.91633  | 2.790007 | 2.500611 | 0.065    | 0.355075 | UP   | 292.2847 | 292.2846 |
| 1167 | M421T30_  | 3.053568 | -1.6105  | -2.15157 | 0.065032 | 0.355076 | DOWN | 421.062  | 421.0617 |
| 1168 | M369T11   | 3.29996  | 1.722449 | 2.137973 | 0.065072 | 0.355076 | UP   | 369.1004 | 369.1    |
| 1169 | M731T36   | 17.46934 | 4.126753 | 2.51306  | 0.0651   | 0.355076 | UP   | 730.5685 | 730.5677 |
| 1170 | M487T23_  | 10.3743  | 3.374942 | 2.469549 | 0.065159 | 0.355076 | UP   | 487.118  | 487.1178 |
| 1171 | M765T29   | 4.976683 | -2.31518 | -2.28272 | 0.065162 | 0.355076 | DOWN | 765.1754 | 765.1754 |
| 1172 | M401T10_  | 3.664836 | 1.873749 | 2.354035 | 0.065184 | 0.355076 | UP   | 401.3956 | 401.3904 |
| 1173 | M525T31_  | 3.822257 | 1.934425 | 2.137097 | 0.065195 | 0.355076 | UP   | 525.0142 | 525.014  |
| 1174 | M373T39   | 11.37612 | 3.507936 | 2.519367 | 0.065276 | 0.355077 | UP   | 373.2139 | 373.2138 |

|      |          |          |          |          |          |          |      |          |          |
|------|----------|----------|----------|----------|----------|----------|------|----------|----------|
| 1175 | M302T39  | 56.36532 | 5.816736 | 2.521136 | 0.065278 | 0.355077 | UP   | 301.7053 | 301.705  |
| 1176 | M300T31_ | 39.29421 | 5.296245 | 2.519103 | 0.065291 | 0.355077 | UP   | 299.7051 | 299.7051 |
| 1177 | M338T29_ | 3.870332 | 1.952457 | 2.13468  | 0.065342 | 0.355077 | UP   | 338.0976 | 338.0973 |
| 1178 | M431T25_ | 2.820135 | 1.495764 | 2.142596 | 0.065553 | 0.355078 | UP   | 431.322  | 431.3211 |
| 1179 | M378T35_ | 2.213215 | 1.146144 | 2.219352 | 0.065586 | 0.355078 | UP   | 377.8177 | 377.8172 |
| 1180 | M909T31  | 132.2867 | 7.047525 | 2.515887 | 0.065632 | 0.355078 | UP   | 909.2276 | 909.2273 |
| 1181 | M351T22_ | 4.476773 | -2.16246 | -2.46798 | 0.065671 | 0.355078 | DOWN | 351.0091 | 351.0089 |
| 1182 | M378T37  | 40.15448 | 5.327489 | 2.511896 | 0.065794 | 0.355079 | UP   | 378.3003 | 378.3001 |
| 1183 | M180T31  | 5.066086 | 2.340872 | 2.214205 | 0.06583  | 0.355079 | UP   | 180.0381 | 180.038  |
| 1184 | M485T37  | 4.41847  | -2.14355 | -2.50685 | 0.065836 | 0.355079 | DOWN | 485.112  | 485.1116 |
| 1185 | M1275T43 | 2.337236 | 1.224803 | 2.206785 | 0.065898 | 0.355079 | UP   | 1274.906 | 1274.903 |
| 1186 | M651T43  | 1.416605 | -0.50244 | -2.12922 | 0.065915 | 0.35508  | DOWN | 650.9551 | 650.9538 |
| 1187 | M343T33  | 15.80267 | 3.982096 | 2.508416 | 0.065915 | 0.35508  | UP   | 343.2246 | 343.2244 |
| 1188 | M338T39_ | 66.55182 | 6.056406 | 2.510153 | 0.066017 | 0.35508  | UP   | 338.0582 | 338.0581 |
| 1189 | M635T30  | 17.06563 | -4.09302 | -2.48963 | 0.066035 | 0.35508  | DOWN | 635.2685 | 635.2684 |
| 1190 | M847T20  | 3.751157 | 1.907336 | 2.258093 | 0.066039 | 0.35508  | UP   | 846.5573 | 846.5564 |
| 1191 | M320T33_ | 3.145971 | 1.653505 | 2.443326 | 0.066068 | 0.35508  | UP   | 319.9106 | 319.9106 |
| 1192 | M538T31_ | 4.122591 | 2.043551 | 2.134986 | 0.066112 | 0.35508  | UP   | 538.0228 | 538.0225 |
| 1193 | M377T32_ | 5.895144 | 2.559527 | 2.486868 | 0.06618  | 0.355081 | UP   | 377.1776 | 377.1775 |
| 1194 | M325T26_ | 4.427967 | 2.146644 | 2.477204 | 0.066193 | 0.355081 | UP   | 325.1465 | 325.1461 |
| 1195 | M334T39_ | 142.7094 | 7.156936 | 2.506775 | 0.066281 | 0.355081 | UP   | 334.479  | 334.4788 |
| 1196 | M335T25_ | 13.45403 | 3.749966 | 2.505871 | 0.066312 | 0.355081 | UP   | 335.2222 | 335.2183 |
| 1197 | M379T29_ | 3.359845 | 1.748395 | 2.409687 | 0.066317 | 0.355081 | UP   | 379.2313 | 379.231  |
| 1198 | M365T31_ | 11.09332 | 3.471619 | 2.500843 | 0.066331 | 0.355081 | UP   | 365.2327 | 365.2322 |
| 1199 | M564T35_ | 181.79   | 7.506129 | 2.505265 | 0.06639  | 0.355082 | UP   | 564.1345 | 564.1344 |
| 1200 | M341T12  | 30.75676 | 4.942832 | 2.503705 | 0.066445 | 0.355082 | UP   | 341.2057 | 341.2054 |
| 1201 | M479T19  | 3.060598 | 1.613814 | 2.243044 | 0.066454 | 0.355082 | UP   | 479.3563 | 479.3554 |
| 1202 | M617T26_ | 23.20328 | 4.536257 | 2.497009 | 0.066508 | 0.355082 | UP   | 617.2233 | 617.2227 |
| 1203 | M954T44  | 3.031367 | -1.59997 | -2.40066 | 0.06653  | 0.355082 | DOWN | 953.5455 | 953.5451 |
| 1204 | M801T43  | 1.620098 | 0.696081 | 2.179043 | 0.066545 | 0.355082 | UP   | 800.5618 | 800.5609 |
| 1205 | M351T21  | 39.81414 | 5.315209 | 2.502727 | 0.066569 | 0.355082 | UP   | 351.226  | 351.2173 |
| 1206 | M345T30_ | 6.963983 | 2.799913 | 2.483118 | 0.066606 | 0.355083 | UP   | 345.2063 | 345.2062 |
| 1207 | M323T26  | 3.423201 | 1.775346 | 2.139601 | 0.066829 | 0.355109 | UP   | 323.1309 | 323.1307 |
| 1208 | M742T32_ | 63.69747 | -5.99316 | -2.4973  | 0.066922 | 0.355121 | DOWN | 742.1882 | 742.1876 |
| 1209 | M321T27_ | 2.898154 | 1.535134 | 2.140284 | 0.066941 | 0.355123 | UP   | 321.2428 | 321.2425 |
| 1210 | M739T33  | 943.3896 | 9.88171  | 2.49653  | 0.067015 | 0.355132 | UP   | 738.9534 | 738.9532 |
| 1211 | M471T11_ | 7.718986 | 2.948411 | 2.371954 | 0.067034 | 0.355134 | UP   | 470.7523 | 470.7518 |
| 1212 | M708T10_ | 2.604141 | 1.380808 | 2.12677  | 0.067083 | 0.35514  | UP   | 707.5443 | 707.5425 |
| 1213 | M450T24  | 22.47988 | 4.490562 | 2.491767 | 0.067103 | 0.355142 | UP   | 450.1444 | 450.1443 |
| 1214 | M632T30  | 7.643959 | -2.93432 | -2.45841 | 0.067115 | 0.355144 | DOWN | 632.2689 | 632.2685 |
| 1215 | M683T37  | 97.54349 | 6.607974 | 2.493505 | 0.067226 | 0.355157 | UP   | 682.5048 | 682.5046 |
| 1216 | M385T31_ | 66.66572 | 6.058873 | 2.492644 | 0.067261 | 0.355161 | UP   | 385.1364 | 385.1361 |
| 1217 | M492T44_ | 1.492637 | 0.577863 | 2.147126 | 0.067372 | 0.355174 | UP   | 492.2799 | 492.2793 |
| 1218 | M397T33  | 4.638901 | 2.213783 | 2.382068 | 0.06739  | 0.355176 | UP   | 397.2952 | 397.2947 |
| 1219 | M531T31  | 91.09149 | 6.509244 | 2.491048 | 0.067392 | 0.355177 | UP   | 531.0664 | 531.0663 |
| 1220 | M1229T43 | 1.862513 | 0.897251 | 2.121966 | 0.067398 | 0.355177 | UP   | 1228.873 | 1228.871 |
| 1221 | M601T22  | 5.52298  | 2.465447 | 2.376026 | 0.067469 | 0.35519  | UP   | 601.1042 | 601.1037 |

|      |          |          |          |          |          |          |      |          |          |
|------|----------|----------|----------|----------|----------|----------|------|----------|----------|
| 1222 | M527T31_ | 3.593232 | 1.845282 | 2.117599 | 0.067593 | 0.355212 | UP   | 527.0141 | 527.0139 |
| 1223 | M468T14  | 50.81163 | 5.667087 | 2.486045 | 0.067662 | 0.355224 | UP   | 468.0041 | 468.0041 |
| 1224 | M380T25_ | 4.31488  | 2.10932  | 2.460397 | 0.067676 | 0.355226 | UP   | 380.2153 | 380.2151 |
| 1225 | M527T31_ | 18.28577 | -4.19265 | -2.47208 | 0.067727 | 0.355235 | DOWN | 527.2957 | 527.2952 |
| 1226 | M481T43_ | 1.388625 | 0.473657 | 2.111084 | 0.067759 | 0.355241 | UP   | 481.0165 | 481.0157 |
| 1227 | M495T43_ | 1.233672 | 0.302959 | 2.189451 | 0.067842 | 0.355255 | UP   | 495.3575 | 495.3566 |
| 1228 | M592T44  | 4.210915 | -2.07413 | -2.45265 | 0.06807  | 0.355295 | DOWN | 592.4608 | 592.4607 |
| 1229 | M288T3   | 42.51633 | 5.409945 | 2.478919 | 0.068236 | 0.355324 | UP   | 287.8884 | 287.8831 |
| 1230 | M373T9_1 | 4.993873 | -2.32016 | -2.34521 | 0.068253 | 0.355326 | DOWN | 373.1845 | 373.1838 |
| 1231 | M684T37  | 190.6506 | 7.574787 | 2.47906  | 0.068279 | 0.355331 | UP   | 683.5081 | 683.508  |
| 1232 | M715T43  | 1.78333  | 0.834574 | 2.117279 | 0.068478 | 0.355365 | UP   | 714.5371 | 714.536  |
| 1233 | M288T22_ | 3.425849 | 1.776462 | 2.162727 | 0.068482 | 0.355366 | UP   | 287.8893 | 287.8892 |
| 1234 | M846T20  | 3.145313 | 1.653203 | 2.228789 | 0.068499 | 0.355369 | UP   | 845.554  | 845.5527 |
| 1235 | M732T36  | 18.47497 | 4.2075   | 2.467091 | 0.068501 | 0.355369 | UP   | 731.5719 | 731.5715 |
| 1236 | M398T20_ | 14.23754 | 3.831628 | 2.457804 | 0.068544 | 0.355376 | UP   | 398.2694 | 398.2692 |
| 1237 | M409T29_ | 3.451933 | 1.787404 | 2.103537 | 0.068658 | 0.355396 | UP   | 409.0659 | 409.0652 |
| 1238 | M238T17  | 13.15328 | 3.717351 | 2.431113 | 0.068668 | 0.355397 | UP   | 238.0527 | 238.0526 |
| 1239 | M597T31_ | 13.33772 | -3.73744 | -2.46259 | 0.068724 | 0.355407 | DOWN | 597.229  | 597.2289 |
| 1240 | M451T22_ | 70.77829 | 6.145235 | 2.47193  | 0.068759 | 0.355413 | UP   | 451.0255 | 451.0253 |
| 1241 | M526T41  | 1.830819 | 0.872489 | 2.117804 | 0.068775 | 0.355416 | UP   | 526.1556 | 526.1539 |
| 1242 | M944T32  | 2.243624 | 1.165831 | 2.152114 | 0.068777 | 0.355416 | UP   | 943.6409 | 943.6396 |
| 1243 | M602T44_ | 1.324913 | 0.405897 | 2.119078 | 0.068781 | 0.355417 | UP   | 602.4429 | 602.4417 |
| 1244 | M427T14  | 51.76108 | 5.693796 | 2.469933 | 0.068795 | 0.355419 | UP   | 426.9776 | 426.9774 |
| 1245 | M469T38  | 1.491443 | -0.57671 | -2.12954 | 0.06889  | 0.355435 | DOWN | 469.0992 | 469.0943 |
| 1246 | M175T24  | 5.286664 | 2.402358 | 2.453087 | 0.068901 | 0.355437 | UP   | 175.0755 | 175.0754 |
| 1247 | M465T25_ | 55.61394 | 5.797375 | 2.46478  | 0.069289 | 0.355502 | UP   | 465.03   | 465.0296 |
| 1248 | M431T37_ | 7.240954 | 2.85618  | 2.447647 | 0.069307 | 0.355505 | UP   | 431.1717 | 431.1717 |
| 1249 | M529T24_ | 11.01375 | 3.461234 | 2.459993 | 0.069361 | 0.355514 | UP   | 529.1559 | 529.1551 |
| 1250 | M566T31  | 4.759029 | 2.250667 | 2.139744 | 0.069371 | 0.355516 | UP   | 566.0412 | 566.0409 |
| 1251 | M350T44_ | 1.39288  | 0.478071 | 2.191232 | 0.0694   | 0.355521 | UP   | 350.1981 | 350.198  |
| 1252 | M515T17_ | 2.531656 | 1.340081 | 2.129446 | 0.069438 | 0.355527 | UP   | 515.3626 | 515.3617 |
| 1253 | M273T2   | 14.49801 | 3.857783 | 2.410681 | 0.069656 | 0.355564 | UP   | 272.902  | 272.9019 |
| 1254 | M454T31  | 2.358984 | 1.238166 | 2.332513 | 0.069873 | 0.355599 | UP   | 454.2924 | 454.2922 |
| 1255 | M409T21_ | 34.15955 | 5.094217 | 2.457321 | 0.069877 | 0.3556   | UP   | 409.1678 | 409.1677 |
| 1256 | M467T30_ | 8.653344 | 3.113258 | 2.453511 | 0.069899 | 0.355604 | UP   | 467.1731 | 467.1728 |
| 1257 | M846T10  | 6.617972 | 2.726389 | 2.254604 | 0.06995  | 0.355612 | UP   | 846.0556 | 846.0551 |
| 1258 | M581T39  | 180.5031 | 7.495879 | 2.45532  | 0.070038 | 0.355626 | UP   | 581.113  | 581.1129 |
| 1259 | M215T36  | 1.692986 | -0.75957 | -2.17835 | 0.070072 | 0.355632 | DOWN | 215.1796 | 215.1795 |
| 1260 | M404T18_ | 1.99917  | -0.9994  | -2.23541 | 0.070127 | 0.355641 | DOWN | 403.9833 | 403.9832 |
| 1261 | M997T44_ | 4.592677 | 2.199335 | 2.198951 | 0.07032  | 0.355672 | UP   | 996.7048 | 996.7024 |
| 1262 | M1186T44 | 1.803122 | 0.850497 | 2.09074  | 0.070334 | 0.355675 | UP   | 1185.85  | 1185.848 |
| 1263 | M331T33_ | 12.66792 | 3.663108 | 2.436197 | 0.070336 | 0.355675 | UP   | 331.2271 | 331.227  |
| 1264 | M360T37_ | 2.759152 | 1.464225 | 2.434049 | 0.070436 | 0.355691 | UP   | 360.2019 | 360.2018 |
| 1265 | M530T31  | 19.49913 | -4.28534 | -2.44609 | 0.070524 | 0.355706 | DOWN | 529.795  | 529.7946 |
| 1266 | M925T23  | 79.30339 | 6.309311 | 2.448552 | 0.070555 | 0.355711 | UP   | 925.4894 | 925.4893 |
| 1267 | M364T37_ | 5.504705 | 2.460665 | 2.408779 | 0.07067  | 0.355729 | UP   | 364.2845 | 364.2844 |
| 1268 | M592T31  | 3.498779 | -1.80685 | -2.3471  | 0.070677 | 0.35573  | DOWN | 592.2638 | 592.2634 |

|      |          |          |          |          |          |          |      |          |          |
|------|----------|----------|----------|----------|----------|----------|------|----------|----------|
| 1269 | M381T20  | 7.578213 | 2.921858 | 2.38696  | 0.070732 | 0.355739 | UP   | 381.1364 | 381.1318 |
| 1270 | M384T24_ | 11.64503 | 3.541643 | 2.427878 | 0.070783 | 0.355747 | UP   | 384.2749 | 384.2748 |
| 1271 | M377T35_ | 7.251981 | 2.858375 | 2.439772 | 0.070785 | 0.355748 | UP   | 377.1775 | 377.1775 |
| 1272 | M693T33_ | 13.71267 | 3.777437 | 2.436155 | 0.070791 | 0.355749 | UP   | 693.3827 | 693.3826 |
| 1273 | M478T19_ | 3.091994 | 1.628538 | 2.212421 | 0.07082  | 0.355753 | UP   | 478.353  | 478.3519 |
| 1274 | M298T37  | 2.303584 | -1.20388 | -2.28646 | 0.070856 | 0.355759 | DOWN | 298.0821 | 298.0818 |
| 1275 | M746T45  | 1.518734 | -0.60287 | -2.09696 | 0.07086  | 0.35576  | DOWN | 745.5871 | 745.5859 |
| 1276 | M265T25_ | 3.72012  | 1.895349 | 2.294049 | 0.07087  | 0.355761 | UP   | 265.1802 | 265.1801 |
| 1277 | M382T31_ | 13.68004 | 3.774001 | 2.441104 | 0.070932 | 0.355771 | UP   | 382.1438 | 382.1437 |
| 1278 | M349T24_ | 47.06171 | 5.556482 | 2.443403 | 0.070932 | 0.355771 | UP   | 349.2377 | 349.2376 |
| 1279 | M1319T43 | 2.408347 | 1.268043 | 2.135998 | 0.070988 | 0.35578  | UP   | 1318.932 | 1318.929 |
| 1280 | M593T22_ | 21.73458 | 4.44192  | 2.439488 | 0.071018 | 0.355785 | UP   | 593.2784 | 593.2777 |
| 1281 | M523T35_ | 69.57942 | 6.120589 | 2.442298 | 0.071025 | 0.355786 | UP   | 523.1077 | 523.1076 |
| 1282 | M320T26  | 5.305114 | 2.407384 | 2.435033 | 0.07105  | 0.35579  | UP   | 320.2306 | 320.2305 |
| 1283 | M587T22_ | 55.15463 | 5.78541  | 2.439615 | 0.071131 | 0.355803 | UP   | 586.8325 | 586.8322 |
| 1284 | M307T22_ | 12.13332 | 3.600902 | 2.419043 | 0.071152 | 0.355806 | UP   | 307.0956 | 307.0955 |
| 1285 | M470T16_ | 86.29102 | 6.431139 | 2.438875 | 0.071271 | 0.355825 | UP   | 470.02   | 470.0198 |
| 1286 | M666T9   | 4.625472 | 2.2096   | 2.335777 | 0.07137  | 0.355841 | UP   | 666.4305 | 666.4291 |
| 1287 | M393T24  | 3.608475 | 1.851389 | 2.203306 | 0.07141  | 0.355847 | UP   | 393.1726 | 393.1723 |
| 1288 | M735T31  | 60.2191  | 5.912149 | 2.434532 | 0.071563 | 0.355871 | UP   | 734.9425 | 734.9425 |
| 1289 | M581T24  | 57.35366 | 5.841814 | 2.433386 | 0.071684 | 0.35589  | UP   | 581.1011 | 581.0999 |
| 1290 | M418T33  | 4.266676 | 2.093112 | 2.419264 | 0.07174  | 0.355899 | UP   | 418.189  | 418.1886 |
| 1291 | M310T30  | 4.725873 | 2.240581 | 2.340008 | 0.071759 | 0.355902 | UP   | 310.2381 | 310.2377 |
| 1292 | M488T23  | 25.19321 | 4.654963 | 2.420323 | 0.071794 | 0.355908 | UP   | 488.1216 | 488.1213 |
| 1293 | M396T38  | 1.491842 | -0.57709 | -2.13168 | 0.071799 | 0.355908 | DOWN | 396.2382 | 396.2381 |
| 1294 | M529T31_ | 24.72386 | -4.62783 | -2.42333 | 0.07185  | 0.355916 | DOWN | 528.7954 | 528.7948 |
| 1295 | M390T31_ | 2.756643 | -1.46291 | -2.21201 | 0.071877 | 0.35592  | DOWN | 390.0778 | 390.0763 |
| 1296 | M538T24  | 19.78599 | 4.306408 | 2.426908 | 0.071893 | 0.355923 | UP   | 538.0905 | 538.0905 |
| 1297 | M432T26_ | 8.315704 | -3.05584 | -2.40242 | 0.071916 | 0.355927 | DOWN | 432.0145 | 432.0143 |
| 1298 | M208T31_ | 4.15713  | 2.055588 | 2.095626 | 0.071961 | 0.355934 | UP   | 208.0694 | 208.0693 |
| 1299 | M540T9   | 3.608832 | 1.851532 | 2.278565 | 0.07198  | 0.355937 | UP   | 540.4202 | 540.4186 |
| 1300 | M698T29  | 20.12637 | -4.33102 | -2.42659 | 0.07207  | 0.35595  | DOWN | 698.2404 | 698.2404 |
| 1301 | M201T39  | 35.90099 | 5.165952 | 2.427882 | 0.072079 | 0.355952 | UP   | 201.1638 | 201.1635 |
| 1302 | M960T44  | 3.864526 | 1.950291 | 2.170062 | 0.072088 | 0.355953 | UP   | 959.6208 | 959.6201 |
| 1303 | M324T36  | 31.0358  | 4.955861 | 2.426351 | 0.072142 | 0.355962 | UP   | 324.2536 | 324.2535 |
| 1304 | M154T29_ | 4.756603 | -2.24993 | -2.39694 | 0.072233 | 0.356019 | DOWN | 153.9483 | 153.9482 |
| 1305 | M331T37_ | 73.08953 | 6.191593 | 2.425668 | 0.072319 | 0.356072 | UP   | 330.6101 | 330.6101 |
| 1306 | M458T35  | 2.809027 | 1.49007  | 2.399943 | 0.072361 | 0.356098 | UP   | 458.2497 | 458.2496 |
| 1307 | M384T24_ | 34.83389 | 5.12242  | 2.421932 | 0.072471 | 0.356166 | UP   | 384.2748 | 384.2747 |
| 1308 | M452T45  | 1.632378 | -0.70697 | -2.11068 | 0.072474 | 0.356168 | DOWN | 452.304  | 452.3032 |
| 1309 | M405T2   | 1540.18  | 10.58888 | 2.422731 | 0.072549 | 0.356214 | UP   | 404.8161 | 404.8159 |
| 1310 | M371T32_ | 2.975137 | 1.572956 | 2.393525 | 0.072693 | 0.356303 | UP   | 371.1512 | 371.1511 |
| 1311 | M399T10_ | 2.983338 | 1.576927 | 2.156195 | 0.072786 | 0.35636  | UP   | 399.4055 | 399.4041 |
| 1312 | M1217T44 | 2.738232 | 1.453245 | 2.065559 | 0.072806 | 0.356372 | UP   | 1216.734 | 1216.733 |
| 1313 | M1405T43 | 2.403608 | 1.265201 | 2.115624 | 0.072884 | 0.35642  | UP   | 1404.978 | 1404.977 |
| 1314 | M639T33_ | 110.0446 | 6.781944 | 2.418086 | 0.072906 | 0.356434 | UP   | 639.0283 | 639.0282 |
| 1315 | M630T31_ | 4.305167 | -2.10607 | -2.3796  | 0.073008 | 0.356496 | DOWN | 630.3075 | 630.307  |

|      |          |          |          |          |          |          |      |          |          |
|------|----------|----------|----------|----------|----------|----------|------|----------|----------|
| 1316 | M301T39  | 5.178563 | 2.372552 | 2.412254 | 0.073125 | 0.356567 | UP   | 301.2164 | 301.2163 |
| 1317 | M690T43_ | 1.309723 | 0.389262 | 2.063155 | 0.073186 | 0.356604 | UP   | 690.4955 | 690.4943 |
| 1318 | M331T30_ | 3.388321 | 1.76057  | 2.246251 | 0.07329  | 0.356668 | UP   | 331.1734 | 331.1727 |
| 1319 | M390T30  | 1.630409 | -0.70523 | -2.17106 | 0.073298 | 0.356672 | DOWN | 390.1577 | 390.1574 |
| 1320 | M609T31_ | 103.2051 | 6.68937  | 2.411627 | 0.073416 | 0.356743 | UP   | 609.0176 | 609.017  |
| 1321 | M839T11_ | 22.37535 | 4.483838 | 2.400235 | 0.073517 | 0.356804 | UP   | 838.5472 | 838.5453 |
| 1322 | M1062T31 | 64.5593  | 6.012553 | 2.409674 | 0.073581 | 0.356843 | UP   | 1061.512 | 1061.511 |
| 1323 | M362T26_ | 3.251716 | 1.701201 | 2.165016 | 0.073591 | 0.356849 | UP   | 362.1417 | 362.1414 |
| 1324 | M160T2   | 1836.403 | 10.84267 | 2.408212 | 0.073697 | 0.356913 | UP   | 159.9691 | 159.9691 |
| 1325 | M683T33_ | 48.39207 | 5.596699 | 2.407214 | 0.073765 | 0.356954 | UP   | 683.0184 | 683.0181 |
| 1326 | M477T34_ | 1.990258 | 0.992955 | 2.061677 | 0.073784 | 0.356965 | UP   | 477.1871 | 477.1861 |
| 1327 | M367T14  | 6.54152  | 2.709626 | 2.333109 | 0.073815 | 0.356983 | UP   | 367.221  | 367.2196 |
| 1328 | M443T18_ | 1.94292  | -0.95823 | -2.06487 | 0.073877 | 0.357021 | DOWN | 443.0128 | 443.0126 |
| 1329 | M315T34  | 8.825526 | 3.141682 | 2.404558 | 0.073923 | 0.357048 | UP   | 315.1569 | 315.1563 |
| 1330 | M513T11_ | 3.405409 | -1.76783 | -2.21465 | 0.073946 | 0.357062 | DOWN | 513.1659 | 513.1649 |
| 1331 | M378T44  | 1.569045 | 0.649886 | 2.234657 | 0.073947 | 0.357062 | UP   | 378.2086 | 378.207  |
| 1332 | M746T19_ | 2.24042  | 1.163769 | 2.05702  | 0.074018 | 0.357105 | UP   | 745.5372 | 745.5358 |
| 1333 | M436T39  | 7.448304 | 2.896912 | 2.396662 | 0.074234 | 0.357233 | UP   | 436.1862 | 436.186  |
| 1334 | M349T35  | 16.86684 | 4.076118 | 2.399651 | 0.074238 | 0.357235 | UP   | 349.2375 | 349.2374 |
| 1335 | M412T14  | 15.46275 | 3.950725 | 2.386228 | 0.074242 | 0.357238 | UP   | 411.9782 | 411.9776 |
| 1336 | M1053T44 | 1.763414 | 0.818371 | 2.077917 | 0.074267 | 0.357252 | UP   | 1052.768 | 1052.766 |
| 1337 | M685T37  | 28.78482 | 4.847236 | 2.400357 | 0.074296 | 0.35727  | UP   | 684.5114 | 684.5112 |
| 1338 | M459T22_ | 12.31425 | -3.62226 | -2.38573 | 0.074599 | 0.357469 | DOWN | 459.0253 | 459.025  |
| 1339 | M277T3   | 7.635036 | 2.932635 | 2.392224 | 0.074661 | 0.357509 | UP   | 276.8968 | 276.8967 |
| 1340 | M799T31_ | 341.5679 | 8.416029 | 2.395624 | 0.074709 | 0.357541 | UP   | 799.2862 | 799.2857 |
| 1341 | M293T21  | 3.651758 | 1.868591 | 2.234447 | 0.074737 | 0.357559 | UP   | 293.073  | 293.0729 |
| 1342 | M528T31_ | 20.62557 | 4.366362 | 2.390008 | 0.074782 | 0.357588 | UP   | 528.074  | 528.0733 |
| 1343 | M440T35_ | 4.277118 | 2.096639 | 2.176303 | 0.07487  | 0.357645 | UP   | 440.4436 | 440.4401 |
| 1344 | M347T21_ | 3.283054 | 1.715039 | 2.14447  | 0.074972 | 0.357711 | UP   | 346.6931 | 346.6931 |
| 1345 | M210T4   | 17.78889 | 4.152904 | 2.388302 | 0.075043 | 0.357757 | UP   | 209.9646 | 209.9645 |
| 1346 | M669T43_ | 1.206031 | 0.270267 | 2.072679 | 0.075167 | 0.357838 | UP   | 668.9836 | 668.9823 |
| 1347 | M731T43  | 2.013549 | 1.009741 | 2.101608 | 0.075282 | 0.357912 | UP   | 730.5679 | 730.566  |
| 1348 | M349T28_ | 8.900791 | 3.153934 | 2.381462 | 0.075301 | 0.357924 | UP   | 349.2108 | 349.2108 |
| 1349 | M669T9   | 9.831812 | -3.29746 | -2.33995 | 0.075597 | 0.358114 | DOWN | 668.953  | 668.9526 |
| 1350 | M387T23_ | 3.503517 | 1.808804 | 2.255326 | 0.075679 | 0.358166 | UP   | 387.1934 | 387.1926 |
| 1351 | M599T44  | 8.476494 | -3.08347 | -2.37855 | 0.075709 | 0.358186 | DOWN | 599.3801 | 599.3792 |
| 1352 | M688T37_ | 19.15809 | 4.259882 | 2.381865 | 0.075791 | 0.358237 | UP   | 688.4636 | 688.4634 |
| 1353 | M909T45  | 5.26179  | 2.395554 | 2.2231   | 0.075819 | 0.358256 | UP   | 908.6517 | 908.6516 |
| 1354 | M844T42_ | 1.818431 | 0.862694 | 2.041196 | 0.075926 | 0.358323 | UP   | 843.5848 | 843.5821 |
| 1355 | M857T33  | 2.026348 | 1.018882 | 2.067539 | 0.075945 | 0.358335 | UP   | 856.5914 | 856.5912 |
| 1356 | M478T29  | 2.59427  | -1.37533 | -2.28495 | 0.076077 | 0.358419 | DOWN | 478.2933 | 478.2929 |
| 1357 | M1029T16 | 6.121345 | 2.613849 | 2.338611 | 0.07609  | 0.358427 | UP   | 1028.717 | 1028.717 |
| 1358 | M391T25_ | 16.37513 | 4.033435 | 2.368699 | 0.076195 | 0.358493 | UP   | 391.1417 | 391.1416 |
| 1359 | M1317T43 | 2.047973 | 1.034197 | 2.050928 | 0.076197 | 0.358494 | UP   | 1316.925 | 1316.923 |
| 1360 | M694T31_ | 6.754281 | 2.755802 | 2.363078 | 0.07629  | 0.358553 | UP   | 694.3703 | 694.37   |
| 1361 | M399T30_ | 3.762436 | 1.911667 | 2.349288 | 0.076398 | 0.358621 | UP   | 399.4118 | 399.4041 |
| 1362 | M704T31_ | 54.54687 | -5.76942 | -2.37373 | 0.076422 | 0.358636 | DOWN | 704.1451 | 704.1449 |

|      |          |          |          |          |          |          |      |          |          |
|------|----------|----------|----------|----------|----------|----------|------|----------|----------|
| 1363 | M565T17  | 3.384064 | 1.758757 | 2.227918 | 0.076561 | 0.358723 | UP   | 564.8693 | 564.869  |
| 1364 | M290T2   | 1900.776 | 10.89237 | 2.372641 | 0.0766   | 0.358748 | UP   | 289.8892 | 289.889  |
| 1365 | M524T11  | 3.388782 | 1.760767 | 2.062971 | 0.07662  | 0.35876  | UP   | 524.3677 | 524.3666 |
| 1366 | M812T33  | 1.988141 | 0.99142  | 2.098935 | 0.076624 | 0.358763 | UP   | 811.5621 | 811.5603 |
| 1367 | M628T23  | 20.87718 | 4.383855 | 2.36599  | 0.076716 | 0.35882  | UP   | 628.0702 | 628.0696 |
| 1368 | M379T31_ | 3.751222 | 1.907361 | 2.045522 | 0.076742 | 0.358836 | UP   | 379.084  | 379.0832 |
| 1369 | M485T17_ | 110.3111 | 6.785434 | 2.370237 | 0.076772 | 0.358855 | UP   | 485.0193 | 485.0191 |
| 1370 | M405T10_ | 3.535385 | 1.821867 | 2.207611 | 0.076792 | 0.358867 | UP   | 404.6195 | 404.6181 |
| 1371 | M651T37  | 101.6981 | 6.668149 | 2.370012 | 0.076813 | 0.35888  | UP   | 651.0275 | 651.0273 |
| 1372 | M809T44  | 9.062237 | -3.17987 | -2.35822 | 0.076823 | 0.358886 | DOWN | 808.6785 | 808.678  |
| 1373 | M632T29  | 5.734137 | -2.51958 | -2.28684 | 0.076844 | 0.3589   | DOWN | 632.2496 | 632.2494 |
| 1374 | M379T19_ | 7.473473 | 2.901779 | 2.306371 | 0.076877 | 0.35892  | UP   | 379.1037 | 379.1036 |
| 1375 | M1450T43 | 3.884668 | 1.957791 | 2.219174 | 0.076933 | 0.358955 | UP   | 1450.007 | 1450.006 |
| 1376 | M365T24  | 17.2831  | 4.11129  | 2.368212 | 0.07695  | 0.358965 | UP   | 365.2419 | 365.2419 |
| 1377 | M629T29  | 4.194541 | -2.06851 | -2.23762 | 0.076964 | 0.358974 | DOWN | 629.2952 | 629.2949 |
| 1378 | M406T22_ | 3.333028 | 1.736833 | 2.10432  | 0.076978 | 0.358982 | UP   | 406.353  | 406.3529 |
| 1379 | M453T33  | 6.613172 | 2.725342 | 2.350144 | 0.077    | 0.358996 | UP   | 453.1761 | 453.176  |
| 1380 | M334T38_ | 4.765096 | 2.252505 | 2.246648 | 0.077268 | 0.359273 | UP   | 334.1531 | 334.1528 |
| 1381 | M289T16  | 2.782334 | -1.4763  | -2.10504 | 0.077457 | 0.359466 | DOWN | 289.0889 | 289.0886 |
| 1382 | M706T22  | 3.933396 | 1.975776 | 2.13528  | 0.077524 | 0.359535 | UP   | 705.9773 | 705.9755 |
| 1383 | M447T28_ | 2.755791 | 1.462466 | 2.271746 | 0.077539 | 0.359549 | UP   | 447.2817 | 447.2805 |
| 1384 | M283T16_ | 6.543823 | 2.710134 | 2.291435 | 0.077635 | 0.359648 | UP   | 283.0632 | 283.063  |
| 1385 | M802T10  | 2.140398 | 1.097879 | 2.027717 | 0.078061 | 0.36008  | UP   | 801.5232 | 801.5204 |
| 1386 | M1185T44 | 1.775955 | 0.828595 | 2.020159 | 0.078168 | 0.360188 | UP   | 1184.847 | 1184.845 |
| 1387 | M695T33  | 167.9266 | 7.391687 | 2.352826 | 0.078272 | 0.360293 | UP   | 695.3981 | 695.3976 |
| 1388 | M634T30  | 8.436708 | -3.07668 | -2.3213  | 0.078411 | 0.360433 | DOWN | 634.2657 | 634.2652 |
| 1389 | M455T21_ | 6.464753 | 2.692595 | 2.338029 | 0.078448 | 0.36047  | UP   | 455.2909 | 455.2907 |
| 1390 | M247T4   | 9.572843 | 3.258947 | 2.337904 | 0.078594 | 0.360616 | UP   | 246.9337 | 246.9336 |
| 1391 | M509T22_ | 5.87225  | 2.553913 | 2.208533 | 0.078604 | 0.360626 | UP   | 509.0783 | 509.0783 |
| 1392 | M182T34  | 5.832029 | 2.543998 | 2.346549 | 0.078626 | 0.360648 | UP   | 182.0529 | 182.0529 |
| 1393 | M395T23_ | 19.70986 | 4.300845 | 2.342931 | 0.078929 | 0.36095  | UP   | 395.0998 | 395.099  |
| 1394 | M531T22  | 6.03743  | 2.593934 | 2.21976  | 0.07896  | 0.360981 | UP   | 530.8977 | 530.8977 |
| 1395 | M251T37  | 1.600204 | -0.67826 | -2.24409 | 0.078991 | 0.361012 | DOWN | 251.0468 | 251.0463 |
| 1396 | M338T18  | 2.626121 | 1.392933 | 2.281281 | 0.079068 | 0.361088 | UP   | 338.254  | 338.2534 |
| 1397 | M1143T44 | 1.674327 | 0.743581 | 2.012965 | 0.079167 | 0.361186 | UP   | 1142.827 | 1142.825 |
| 1398 | M1064T31 | 481.8249 | 8.912365 | 2.342323 | 0.079176 | 0.361196 | UP   | 1063.507 | 1063.506 |
| 1399 | M473T26  | 7.974709 | -2.99543 | -2.32117 | 0.079222 | 0.361241 | DOWN | 473.0412 | 473.0408 |
| 1400 | M644T10  | 4.428057 | 2.146674 | 2.141115 | 0.079244 | 0.361263 | UP   | 643.9091 | 643.9086 |
| 1401 | M676T29_ | 12.93603 | -3.69332 | -2.32138 | 0.079256 | 0.361274 | DOWN | 676.2583 | 676.2582 |
| 1402 | M354T41  | 4.325035 | 2.112712 | 2.31903  | 0.079364 | 0.361381 | UP   | 354.3006 | 354.3005 |
| 1403 | M726T10  | 31.82447 | 4.992065 | 2.33661  | 0.079392 | 0.361408 | UP   | 726.4453 | 726.4448 |
| 1404 | M187T3   | 4.931807 | 2.302116 | 2.338728 | 0.079404 | 0.361421 | UP   | 186.9563 | 186.9562 |
| 1405 | M535T29_ | 4.032953 | 2.011837 | 2.051847 | 0.079499 | 0.361514 | UP   | 535.1292 | 535.1285 |
| 1406 | M1360T9  | 2.797077 | 1.48392  | 2.169644 | 0.079561 | 0.361575 | UP   | 1360.029 | 1360.023 |
| 1407 | M350T30_ | 6.367379 | 2.6707   | 2.322708 | 0.079653 | 0.361665 | UP   | 350.2411 | 350.241  |
| 1408 | M382T35  | 35.7329  | 5.159181 | 2.334162 | 0.079846 | 0.361854 | UP   | 382.259  | 382.2589 |
| 1409 | M350T44_ | 1.456498 | 0.542504 | 2.005963 | 0.079955 | 0.36196  | UP   | 350.2174 | 350.2168 |

|      |          |          |          |          |          |          |      |          |          |
|------|----------|----------|----------|----------|----------|----------|------|----------|----------|
| 1410 | M404T18_ | 1.879239 | 0.910148 | 2.015384 | 0.079975 | 0.361979 | UP   | 404.2438 | 404.2434 |
| 1411 | M757T43_ | 1.468175 | 0.554023 | 2.014868 | 0.079984 | 0.361988 | UP   | 756.535  | 756.5338 |
| 1412 | M505T33  | 246.116  | 7.943195 | 2.331631 | 0.080106 | 0.362107 | UP   | 505.1199 | 505.1196 |
| 1413 | M199T24  | 2.816562 | -1.49394 | -2.30881 | 0.080262 | 0.362258 | DOWN | 199.1693 | 199.169  |
| 1414 | M609T29  | 4.673022 | -2.22436 | -2.24152 | 0.080309 | 0.362303 | DOWN | 609.2525 | 609.252  |
| 1415 | M767T31  | 68.68054 | 6.101829 | 2.328    | 0.080403 | 0.362394 | UP   | 767.2917 | 767.2912 |
| 1416 | M479T21_ | 15.49095 | 3.953353 | 2.323551 | 0.08041  | 0.362401 | UP   | 479.312  | 479.3116 |
| 1417 | M378T31_ | 3.324978 | 1.733345 | 2.009844 | 0.080423 | 0.362414 | UP   | 378.0874 | 378.0866 |
| 1418 | M463T27  | 4.559127 | 2.188758 | 2.197612 | 0.080451 | 0.362441 | UP   | 463.1418 | 463.1414 |
| 1419 | M582T39  | 31.51858 | 4.978131 | 2.321723 | 0.08051  | 0.362498 | UP   | 582.1164 | 582.1164 |
| 1420 | M341T20  | 42.93085 | 5.423943 | 2.324267 | 0.080591 | 0.362576 | UP   | 340.6191 | 340.619  |
| 1421 | M625T11_ | 5.892756 | 2.558942 | 2.1703   | 0.080611 | 0.362595 | UP   | 625.2977 | 625.2969 |
| 1422 | M388T31  | 3.359409 | -1.74821 | -2.17238 | 0.080675 | 0.362657 | DOWN | 388.0812 | 388.0807 |
| 1423 | M680T20  | 26.38573 | 4.721686 | 2.321979 | 0.080785 | 0.362761 | UP   | 680.2314 | 680.2312 |
| 1424 | M703T43_ | 1.449622 | 0.535677 | 2.045822 | 0.080958 | 0.362927 | UP   | 703.4942 | 703.4931 |
| 1425 | M683T30  | 140.4244 | 7.13365  | 2.321751 | 0.080972 | 0.36294  | UP   | 683.3096 | 683.3092 |
| 1426 | M965T44  | 1.613106 | 0.689842 | 2.022476 | 0.081006 | 0.362973 | UP   | 964.7153 | 964.7137 |
| 1427 | M796T33  | 259.0722 | 8.017211 | 2.321265 | 0.081021 | 0.362987 | UP   | 796.3266 | 796.3265 |
| 1428 | M1274T43 | 1.869384 | 0.902563 | 1.995039 | 0.081209 | 0.363166 | UP   | 1273.902 | 1273.9   |
| 1429 | M1318T43 | 2.148708 | 1.10347  | 2.013736 | 0.081211 | 0.363168 | UP   | 1317.929 | 1317.926 |
| 1430 | M409T24_ | 3.415797 | 1.772222 | 2.102682 | 0.081253 | 0.363208 | UP   | 409.152  | 409.1497 |
| 1431 | M389T18_ | 13.61627 | 3.767259 | 2.316886 | 0.081346 | 0.363297 | UP   | 389.2555 | 389.2554 |
| 1432 | M795T33  | 627.5954 | 9.293691 | 2.316412 | 0.081456 | 0.363401 | UP   | 795.3231 | 795.3227 |
| 1433 | M295T34_ | 59.12375 | 5.885666 | 2.316398 | 0.081458 | 0.363402 | UP   | 294.6373 | 294.6372 |
| 1434 | M595T27_ | 13.30054 | 3.733413 | 2.301143 | 0.081534 | 0.363474 | UP   | 595.0944 | 595.0936 |
| 1435 | M342T22_ | 41.52753 | 5.375996 | 2.313036 | 0.081572 | 0.36351  | UP   | 342.0826 | 342.0824 |
| 1436 | M775T31_ | 131.7855 | 7.042048 | 2.314491 | 0.081624 | 0.363559 | UP   | 775.32   | 775.319  |
| 1437 | M362T26_ | 2.02281  | 1.016361 | 2.146671 | 0.081627 | 0.363562 | UP   | 362.1088 | 362.1086 |
| 1438 | M276T26  | 11.60558 | -3.53675 | -2.30696 | 0.08166  | 0.363594 | DOWN | 276.0938 | 276.0933 |
| 1439 | M364T2   | 3289.512 | 11.68366 | 2.313401 | 0.081726 | 0.363656 | UP   | 363.7897 | 363.7895 |
| 1440 | M822T42_ | 1.617343 | 0.693626 | 2.001056 | 0.081757 | 0.363684 | UP   | 821.5716 | 821.5695 |
| 1441 | M751T44  | 2.010871 | 1.00782  | 2.239848 | 0.08188  | 0.363799 | UP   | 751.3862 | 751.3858 |
| 1442 | M715T31_ | 6.759616 | 2.756941 | 2.250325 | 0.081927 | 0.363844 | UP   | 714.5375 | 714.5371 |
| 1443 | M472T38  | 3.640016 | 1.863945 | 1.986585 | 0.08224  | 0.364136 | UP   | 472.0927 | 472.0924 |
| 1444 | M1039T44 | 6.713061 | 2.746971 | 2.186813 | 0.08237  | 0.364257 | UP   | 1039.494 | 1039.493 |
| 1445 | M368T36  | 28.11197 | 4.813113 | 2.303935 | 0.082455 | 0.364337 | UP   | 368.2801 | 368.2796 |
| 1446 | M680T33  | 1.645049 | 0.718131 | 2.11678  | 0.082619 | 0.364489 | UP   | 680.4859 | 680.4852 |
| 1447 | M691T43_ | 1.259475 | 0.332822 | 2.005669 | 0.08268  | 0.364544 | UP   | 690.997  | 690.9956 |
| 1448 | M706T44  | 1.947645 | 0.96173  | 2.205447 | 0.082714 | 0.364576 | UP   | 706.3641 | 706.364  |
| 1449 | M459T29_ | 3.725764 | 1.897536 | 1.983011 | 0.082729 | 0.36459  | UP   | 458.5257 | 458.5255 |
| 1450 | M504T43_ | 1.430492 | 0.516512 | 2.081506 | 0.082744 | 0.364604 | UP   | 504.3576 | 504.3574 |
| 1451 | M203T3   | 7.091569 | 2.826105 | 2.269769 | 0.082745 | 0.364605 | UP   | 202.9876 | 202.9875 |
| 1452 | M454T2   | 797.3535 | 9.639076 | 2.300747 | 0.082871 | 0.364721 | UP   | 453.7299 | 453.7298 |
| 1453 | M610T31  | 7.120415 | -2.83196 | -2.28668 | 0.082903 | 0.36475  | DOWN | 610.2657 | 610.2653 |
| 1454 | M275T21  | 3.295422 | 1.720463 | 2.08263  | 0.082933 | 0.364778 | UP   | 275.0987 | 275.0981 |
| 1455 | M431T25_ | 2.219802 | 1.150431 | 1.982872 | 0.083192 | 0.365016 | UP   | 430.6532 | 430.6524 |
| 1456 | M1231T43 | 1.939711 | 0.955842 | 1.987604 | 0.083233 | 0.365053 | UP   | 1230.88  | 1230.878 |

|      |          |          |          |          |          |          |      |          |          |
|------|----------|----------|----------|----------|----------|----------|------|----------|----------|
| 1457 | M643T31  | 4.626393 | 2.209888 | 2.025169 | 0.083257 | 0.365075 | UP   | 642.9501 | 642.9495 |
| 1458 | M396T22  | 4.437558 | -2.14977 | -2.28848 | 0.083342 | 0.365152 | DOWN | 396.2429 | 396.2417 |
| 1459 | M282T28  | 11.39748 | 3.510643 | 2.270516 | 0.083441 | 0.365242 | UP   | 281.6047 | 281.6041 |
| 1460 | M385T34  | 10.97431 | 3.456058 | 2.290965 | 0.08345  | 0.365251 | UP   | 385.2781 | 385.278  |
| 1461 | M484T23_ | 21.57147 | 4.431053 | 2.29265  | 0.083494 | 0.365291 | UP   | 484.1975 | 484.1975 |
| 1462 | M451T31_ | 8.948025 | 3.161569 | 2.286431 | 0.083539 | 0.365332 | UP   | 451.1607 | 451.1602 |
| 1463 | M531T40_ | 2.545652 | 1.348035 | 1.980721 | 0.083711 | 0.365488 | UP   | 531.1338 | 531.1336 |
| 1464 | M891T23  | 55.62691 | 5.797711 | 2.289446 | 0.083807 | 0.365575 | UP   | 891.4894 | 891.4886 |
| 1465 | M306T22  | 5.120458 | 2.356273 | 2.167715 | 0.083835 | 0.3656   | UP   | 306.0984 | 306.098  |
| 1466 | M507T18  | 2.312944 | 1.20973  | 2.172879 | 0.08387  | 0.365632 | UP   | 506.8975 | 506.8969 |
| 1467 | M675T10_ | 4.023915 | 2.0086   | 2.188756 | 0.084122 | 0.365858 | UP   | 675.392  | 675.3895 |
| 1468 | M558T44_ | 1.2627   | 0.336512 | 1.975019 | 0.084181 | 0.365912 | UP   | 558.4162 | 558.4154 |
| 1469 | M315T30_ | 2.596135 | -1.37637 | -2.24843 | 0.08425  | 0.365974 | DOWN | 315.0849 | 315.0844 |
| 1470 | M687T37_ | 223.9737 | 7.807186 | 2.283994 | 0.084411 | 0.366118 | UP   | 687.4601 | 687.4599 |
| 1471 | M319T31_ | 80.04992 | 6.322828 | 2.278527 | 0.084924 | 0.366575 | UP   | 318.5739 | 318.5736 |
| 1472 | M372T30  | 7.788269 | 2.961303 | 2.266777 | 0.084976 | 0.36662  | UP   | 372.223  | 372.2226 |
| 1473 | M371T38  | 2.758351 | 1.463806 | 2.258697 | 0.084988 | 0.366631 | UP   | 371.1983 | 371.1983 |
| 1474 | M416T33_ | 3.880385 | 1.9562   | 2.213921 | 0.085006 | 0.366647 | UP   | 416.1657 | 416.1655 |
| 1475 | M685T13  | 4.523947 | 2.177582 | 2.101671 | 0.085067 | 0.366701 | UP   | 684.5344 | 684.5337 |
| 1476 | M324T26  | 3.031044 | 1.599815 | 1.990816 | 0.08516  | 0.366783 | UP   | 324.1344 | 324.1343 |
| 1477 | M602T44_ | 1.239236 | 0.309451 | 1.995427 | 0.085424 | 0.367015 | UP   | 601.9414 | 601.9404 |
| 1478 | M337T18_ | 3.910791 | -1.96746 | -2.17812 | 0.085463 | 0.367049 | DOWN | 336.9935 | 336.9934 |
| 1479 | M528T31_ | 11.8153  | -3.56258 | -2.26257 | 0.08549  | 0.367073 | DOWN | 527.7974 | 527.7968 |
| 1480 | M412T32  | 3.623329 | 1.857316 | 2.213506 | 0.08557  | 0.367142 | UP   | 412.1775 | 412.1773 |
| 1481 | M670T13  | 4.036994 | 2.013282 | 2.082546 | 0.085577 | 0.367149 | UP   | 670.4994 | 670.498  |
| 1482 | M747T44  | 3.076258 | 1.621176 | 2.22756  | 0.085682 | 0.367241 | UP   | 747.3906 | 747.3903 |
| 1483 | M890T23  | 30.19571 | 4.916272 | 2.268218 | 0.08575  | 0.3673   | UP   | 890.4857 | 890.4852 |
| 1484 | M458T33_ | 1.928392 | 0.947398 | 1.962556 | 0.085853 | 0.36739  | UP   | 458.3219 | 458.3212 |
| 1485 | M307T35  | 10.03754 | 3.327334 | 2.267588 | 0.085912 | 0.367441 | UP   | 307.227  | 307.2269 |
| 1486 | M353T30_ | 3.901863 | 1.964163 | 1.983247 | 0.085964 | 0.367486 | UP   | 353.0815 | 353.0809 |
| 1487 | M350T27_ | 2.849372 | 1.510644 | 2.195092 | 0.085966 | 0.367488 | UP   | 350.2412 | 350.2409 |
| 1488 | M388T23_ | 2.959716 | 1.565459 | 2.14625  | 0.085988 | 0.367507 | UP   | 388.1968 | 388.1962 |
| 1489 | M617T44  | 2.843407 | -1.50762 | -2.06897 | 0.086121 | 0.367622 | DOWN | 617.4326 | 617.4305 |
| 1490 | M307T23_ | 3.382786 | 1.758212 | 2.022241 | 0.086135 | 0.367634 | UP   | 307.1107 | 307.1106 |
| 1491 | M383T31_ | 3.371777 | 1.753509 | 1.959536 | 0.086172 | 0.367666 | UP   | 383.0798 | 383.0792 |
| 1492 | M630T10  | 4.553001 | 2.186818 | 2.038401 | 0.086268 | 0.367749 | UP   | 629.8563 | 629.8556 |
| 1493 | M994T44  | 4.266239 | 2.092965 | 2.142887 | 0.086273 | 0.367754 | UP   | 993.5084 | 993.5069 |
| 1494 | M516T11_ | 3.187394 | -1.67238 | -2.2218  | 0.086368 | 0.367835 | DOWN | 516.1581 | 516.1572 |
| 1495 | M274T31  | 3.432001 | 1.77905  | 1.9549   | 0.086382 | 0.367847 | UP   | 274.0529 | 274.0528 |
| 1496 | M261T21  | 3.608648 | 1.851458 | 2.128645 | 0.086504 | 0.367953 | UP   | 261.0831 | 261.0828 |
| 1497 | M347T25_ | 30.90184 | 4.949621 | 2.258736 | 0.086514 | 0.367961 | UP   | 347.2222 | 347.2221 |
| 1498 | M483T32_ | 2.638621 | -1.39978 | -2.08688 | 0.086562 | 0.368002 | DOWN | 483.3636 | 483.3628 |
| 1499 | M497T31_ | 3.547162 | 1.826665 | 1.982032 | 0.08663  | 0.368061 | UP   | 497.0193 | 497.0192 |
| 1500 | M362T2   | 969.2565 | 9.920735 | 2.258332 | 0.086841 | 0.368241 | UP   | 361.7944 | 361.7942 |
| 1501 | M496T31_ | 3.615381 | -1.85415 | -2.20193 | 0.086854 | 0.368253 | DOWN | 496.3634 | 496.3559 |
| 1502 | M247T22_ | 3.040072 | 1.604105 | 1.963615 | 0.086861 | 0.368258 | UP   | 246.8625 | 246.8625 |
| 1503 | M224T37  | 1.841282 | -0.88071 | -2.03751 | 0.086981 | 0.368361 | DOWN | 224.0631 | 224.0629 |



|      |          |          |          |          |          |          |      |          |          |
|------|----------|----------|----------|----------|----------|----------|------|----------|----------|
| 1504 | M295T3   | 3.671801 | 1.876488 | 2.248868 | 0.08703  | 0.368403 | UP   | 294.8837 | 294.8836 |
| 1505 | M360T28  | 3.020359 | 1.59472  | 2.110756 | 0.087035 | 0.368407 | UP   | 360.3474 | 360.3469 |
| 1506 | M797T33  | 75.50843 | 6.238566 | 2.255217 | 0.087124 | 0.368483 | UP   | 797.3234 | 797.3231 |
| 1507 | M542T35  | 2.964806 | 1.567938 | 2.133784 | 0.087174 | 0.368525 | UP   | 542.4083 | 542.4081 |
| 1508 | M636T30  | 7.237912 | -2.85557 | -2.2467  | 0.087306 | 0.368638 | DOWN | 636.2642 | 636.2638 |
| 1509 | M248T16  | 4.339695 | -2.11759 | -2.20704 | 0.087308 | 0.368639 | DOWN | 248.0622 | 248.0621 |
| 1510 | M236T2   | 1310.026 | 10.35538 | 2.253466 | 0.087309 | 0.36864  | UP   | 235.87   | 235.8699 |
| 1511 | M411T22_ | 16.50304 | 4.04466  | 2.245498 | 0.087457 | 0.368765 | UP   | 411.0025 | 411.0025 |
| 1512 | M514T44_ | 1.290739 | 0.368197 | 1.986653 | 0.08747  | 0.368776 | UP   | 513.8885 | 513.8876 |
| 1513 | M581T23  | 177.5531 | 7.472107 | 2.251737 | 0.087472 | 0.368778 | UP   | 581.0775 | 581.0773 |
| 1514 | M763T32  | 8.984789 | 3.167485 | 2.209677 | 0.087496 | 0.368798 | UP   | 763.2097 | 763.2096 |
| 1515 | M577T37  | 73.39041 | 6.19752  | 2.250044 | 0.087629 | 0.36891  | UP   | 577.1024 | 577.1023 |
| 1516 | M161T33_ | 3.443798 | 1.784    | 2.231814 | 0.087662 | 0.368938 | UP   | 161.0961 | 161.0961 |
| 1517 | M464T39  | 1.38906  | 0.474109 | 1.948816 | 0.087888 | 0.369128 | UP   | 464.3581 | 464.3573 |
| 1518 | M529T31_ | 5.7638   | -2.52702 | -2.20425 | 0.088046 | 0.36926  | DOWN | 529.2933 | 529.2928 |
| 1519 | M389T31_ | 2.494221 | -1.31859 | -2.05607 | 0.088073 | 0.369283 | DOWN | 389.0749 | 389.0742 |
| 1520 | M1065T31 | 500.3655 | 8.966838 | 2.244681 | 0.088163 | 0.369358 | UP   | 1064.51  | 1064.51  |
| 1521 | M555T31_ | 4.327698 | -2.1136  | -2.11493 | 0.088183 | 0.369374 | DOWN | 555.254  | 555.2531 |
| 1522 | M333T27_ | 10.64488 | 3.412088 | 2.235015 | 0.08838  | 0.369538 | UP   | 333.1151 | 333.1148 |
| 1523 | M431T25_ | 2.083628 | 1.059097 | 1.939395 | 0.08843  | 0.36958  | UP   | 430.9877 | 430.9869 |
| 1524 | M641T35  | 92.08382 | 6.524876 | 2.241009 | 0.088507 | 0.369643 | UP   | 641.0436 | 641.0435 |
| 1525 | M609T31_ | 4.86153  | -2.28141 | -2.1632  | 0.088535 | 0.369667 | DOWN | 609.2722 | 609.272  |
| 1526 | M570T33  | 68.34208 | 6.094702 | 2.239343 | 0.088674 | 0.369782 | UP   | 570.1134 | 570.1133 |
| 1527 | M652T11_ | 6.928665 | 2.792577 | 2.119098 | 0.088701 | 0.369804 | UP   | 651.8586 | 651.8573 |
| 1528 | M355T15  | 13.25383 | 3.728338 | 2.235383 | 0.08879  | 0.369878 | UP   | 355.2214 | 355.2211 |
| 1529 | M757T44_ | 1.880953 | 0.911464 | 1.936673 | 0.088819 | 0.369901 | UP   | 757.3803 | 757.3794 |
| 1530 | M354T15  | 20.27006 | 4.341279 | 2.236629 | 0.08892  | 0.369985 | UP   | 354.218  | 354.2178 |
| 1531 | M292T34  | 54.19189 | 5.760005 | 2.236242 | 0.088992 | 0.370044 | UP   | 291.7234 | 291.7234 |
| 1532 | M229T36  | 6.603941 | 2.723327 | 2.219918 | 0.089011 | 0.37006  | UP   | 229.1951 | 229.1951 |
| 1533 | M675T31  | 21.407   | 4.420011 | 2.234165 | 0.089093 | 0.370126 | UP   | 675.3942 | 675.3939 |
| 1534 | M333T32_ | 98.74423 | 6.625625 | 2.234099 | 0.089178 | 0.370196 | UP   | 332.9646 | 332.9646 |
| 1535 | M485T24  | 8.220467 | 3.03922  | 2.223957 | 0.089298 | 0.370295 | UP   | 485.1661 | 485.1657 |
| 1536 | M384T17  | 13.59416 | 3.764915 | 2.200453 | 0.089314 | 0.370308 | UP   | 383.9831 | 383.983  |
| 1537 | M549T33_ | 32.46561 | 5.02084  | 2.23231  | 0.089326 | 0.370318 | UP   | 549.0873 | 549.0873 |
| 1538 | M652T40  | 88.83819 | 6.473108 | 2.232185 | 0.089387 | 0.370367 | UP   | 651.986  | 651.986  |
| 1539 | M945T11  | 8.424843 | 3.07465  | 2.168407 | 0.089387 | 0.370367 | UP   | 944.5851 | 944.5835 |
| 1540 | M490T43_ | 1.22009  | 0.286987 | 2.006171 | 0.089402 | 0.37038  | UP   | 489.6821 | 489.6809 |
| 1541 | M725T43  | 1.254947 | 0.327627 | 1.931785 | 0.089475 | 0.370439 | UP   | 725.0053 | 725.004  |
| 1542 | M936T44  | 3.267348 | 1.70812  | 2.043406 | 0.08958  | 0.370524 | UP   | 935.5956 | 935.5935 |
| 1543 | M381T31_ | 3.473612 | 1.796436 | 1.938312 | 0.089613 | 0.370551 | UP   | 381.0843 | 381.0834 |
| 1544 | M319T22_ | 3.022829 | 1.5959   | 2.144552 | 0.089625 | 0.370561 | UP   | 319.1911 | 319.1909 |
| 1545 | M422T39  | 20.50777 | 4.358098 | 2.22749  | 0.089625 | 0.370561 | UP   | 422.3629 | 422.3628 |
| 1546 | M327T22_ | 3.133125 | 1.647602 | 2.206343 | 0.089731 | 0.370647 | UP   | 327.2241 | 327.2239 |
| 1547 | M418T22_ | 3.282479 | -1.71479 | -2.13941 | 0.089786 | 0.370692 | DOWN | 417.9989 | 417.9985 |
| 1548 | M735T43  | 1.535521 | 0.618728 | 2.002249 | 0.089802 | 0.370704 | UP   | 734.5217 | 734.5204 |
| 1549 | M600T31_ | 41.44511 | 5.37313  | 2.227083 | 0.089826 | 0.370724 | UP   | 600.4686 | 600.4685 |
| 1550 | M432T31_ | 4.325158 | 2.112753 | 2.191491 | 0.089943 | 0.370819 | UP   | 432.1962 | 432.1959 |

|      |          |          |          |          |          |          |      |          |          |
|------|----------|----------|----------|----------|----------|----------|------|----------|----------|
| 1551 | M669T13  | 3.652125 | 1.868736 | 1.981323 | 0.090011 | 0.370874 | UP   | 669.4961 | 669.4958 |
| 1552 | M440T28_ | 3.290058 | 1.718113 | 2.162586 | 0.090041 | 0.370898 | UP   | 439.9969 | 439.9959 |
| 1553 | M373T38  | 4.48075  | -2.16374 | -2.18526 | 0.090079 | 0.370928 | DOWN | 373.1826 | 373.1821 |
| 1554 | M278T26_ | 12.47279 | -3.64071 | -2.2149  | 0.090143 | 0.37098  | DOWN | 278.0903 | 278.0902 |
| 1555 | M361T23  | 2.916541 | 1.544259 | 2.000742 | 0.090256 | 0.371071 | UP   | 361.2083 | 361.2081 |
| 1556 | M433T32  | 6.391406 | 2.676133 | 2.203387 | 0.090258 | 0.371073 | UP   | 432.8894 | 432.8892 |
| 1557 | M711T44  | 1.983426 | 0.987995 | 2.138705 | 0.090379 | 0.37117  | UP   | 711.3629 | 711.3627 |
| 1558 | M297T31_ | 3.106046 | 1.635079 | 1.932495 | 0.090501 | 0.371267 | UP   | 296.6481 | 296.6477 |
| 1559 | M357T31  | 4.956695 | 2.309379 | 2.216671 | 0.090588 | 0.371336 | UP   | 357.1742 | 357.1725 |
| 1560 | M512T11_ | 150.2797 | 7.231506 | 2.219934 | 0.090617 | 0.37136  | UP   | 512.2757 | 512.2755 |
| 1561 | M343T17_ | 10.41903 | 3.381149 | 2.17618  | 0.090671 | 0.371403 | UP   | 342.9566 | 342.9565 |
| 1562 | M1011T44 | 1.637264 | 0.711287 | 1.926792 | 0.090914 | 0.371596 | UP   | 1010.748 | 1010.746 |
| 1563 | M688T43  | 20.99477 | 4.391958 | 2.213992 | 0.091146 | 0.37178  | UP   | 687.5134 | 687.5133 |
| 1564 | M483T19_ | 40.33551 | 5.333979 | 2.211795 | 0.091259 | 0.371869 | UP   | 483.0036 | 483.0034 |
| 1565 | M513T44  | 1.249279 | 0.321096 | 1.927524 | 0.091267 | 0.371876 | UP   | 513.3868 | 513.3859 |
| 1566 | M1187T44 | 1.699881 | 0.765434 | 1.918794 | 0.09129  | 0.371894 | UP   | 1186.853 | 1186.851 |
| 1567 | M668T29  | 13.73449 | -3.77973 | -2.20157 | 0.091373 | 0.371959 | DOWN | 668.2267 | 668.2261 |
| 1568 | M317T39  | 2.871318 | 1.521713 | 2.178909 | 0.091419 | 0.371995 | UP   | 317.2476 | 317.2475 |
| 1569 | M1141T44 | 1.732715 | 0.793034 | 1.923132 | 0.091478 | 0.372042 | UP   | 1140.82  | 1140.818 |
| 1570 | M325T26_ | 2.999668 | 1.584803 | 2.128217 | 0.091496 | 0.372056 | UP   | 325.1314 | 325.1311 |
| 1571 | M460T39  | 18.31379 | 4.194859 | 2.20565  | 0.091553 | 0.372101 | UP   | 460.1423 | 460.142  |
| 1572 | M1142T44 | 1.696045 | 0.762175 | 1.919702 | 0.091573 | 0.372116 | UP   | 1141.824 | 1141.822 |
| 1573 | M273T30_ | 3.072219 | -1.61928 | -2.16931 | 0.091594 | 0.372133 | DOWN | 273.0377 | 273.0375 |
| 1574 | M575T39  | 7.631928 | 2.932048 | 2.138082 | 0.091641 | 0.372169 | UP   | 575.1604 | 575.1596 |
| 1575 | M404T10_ | 2.829252 | 1.500421 | 1.93754  | 0.09167  | 0.372192 | UP   | 403.6076 | 403.6062 |
| 1576 | M961T44  | 2.792646 | 1.481633 | 2.051029 | 0.091863 | 0.372343 | UP   | 960.6268 | 960.6254 |
| 1577 | M517T27_ | 3.192405 | -1.67464 | -2.0325  | 0.092139 | 0.372558 | DOWN | 517.309  | 517.3086 |
| 1578 | M500T44  | 2.301082 | 1.202312 | 2.173126 | 0.092163 | 0.372577 | UP   | 500.1238 | 500.1237 |
| 1579 | M484T30  | 2.139049 | -1.09697 | -2.06687 | 0.09218  | 0.37259  | DOWN | 484.3395 | 484.3393 |
| 1580 | M560T30  | 1.201413 | -0.26473 | -2.10699 | 0.092271 | 0.372661 | DOWN | 560.3877 | 560.387  |
| 1581 | M380T31  | 3.357022 | 1.747182 | 1.91305  | 0.092282 | 0.372669 | UP   | 380.0874 | 380.0872 |
| 1582 | M630T40_ | 160.85   | 7.329572 | 2.200562 | 0.092583 | 0.372902 | UP   | 629.9731 | 629.9729 |
| 1583 | M656T29_ | 10.94055 | 3.451613 | 2.177497 | 0.092593 | 0.37291  | UP   | 656.4953 | 656.4937 |
| 1584 | M690T9_1 | 4.072124 | 2.025782 | 2.041989 | 0.092675 | 0.372973 | UP   | 689.9119 | 689.9102 |
| 1585 | M379T29_ | 4.40385  | 2.138765 | 2.186068 | 0.09268  | 0.372977 | UP   | 379.2312 | 379.231  |
| 1586 | M298T31_ | 2.70195  | 1.434001 | 1.908608 | 0.092822 | 0.373086 | UP   | 298.1444 | 298.1443 |
| 1587 | M1099T44 | 1.686325 | 0.753883 | 1.911759 | 0.092831 | 0.373093 | UP   | 1098.8   | 1098.799 |
| 1588 | M263T21  | 3.110739 | 1.637258 | 1.986325 | 0.092837 | 0.373097 | UP   | 263.0986 | 263.098  |
| 1589 | M780T30_ | 1.375922 | -0.4604  | -1.96897 | 0.092842 | 0.373101 | DOWN | 779.5153 | 779.5142 |
| 1590 | M923T44_ | 1.480266 | 0.565856 | 1.908046 | 0.092875 | 0.373126 | UP   | 922.6955 | 922.6939 |
| 1591 | M231T30  | 2.958312 | -1.56477 | -2.17008 | 0.092877 | 0.373128 | DOWN | 230.9907 | 230.9906 |
| 1592 | M441T22_ | 23.09001 | 4.529197 | 2.191735 | 0.093028 | 0.373244 | UP   | 440.9022 | 440.9019 |
| 1593 | M342T10_ | 4.181184 | 2.063911 | 2.133017 | 0.093048 | 0.373259 | UP   | 342.0895 | 342.0882 |
| 1594 | M552T34_ | 2.550561 | 1.350815 | 1.9881   | 0.093119 | 0.373313 | UP   | 552.3984 | 552.3975 |
| 1595 | M850T28  | 2.626332 | 1.393049 | 1.907375 | 0.093181 | 0.373361 | UP   | 849.6356 | 849.6334 |
| 1596 | M291T31  | 3.431298 | 1.778755 | 1.907063 | 0.093226 | 0.373395 | UP   | 291.089  | 291.089  |
| 1597 | M457T22  | 12.41675 | -3.63422 | -2.18152 | 0.09334  | 0.373482 | DOWN | 457.0286 | 457.0283 |

|      |          |          |          |          |          |          |      |          |          |
|------|----------|----------|----------|----------|----------|----------|------|----------|----------|
| 1598 | M318T31_ | 3.535614 | 1.821961 | 1.904039 | 0.093426 | 0.373547 | UP   | 318.0426 | 318.0425 |
| 1599 | M332T25  | 1.712619 | -0.7762  | -1.98389 | 0.09345  | 0.373565 | DOWN | 332.1197 | 332.1191 |
| 1600 | M346T21_ | 3.229672 | 1.691388 | 1.975037 | 0.093578 | 0.373662 | UP   | 345.696  | 345.6956 |
| 1601 | M594T29  | 3.9034   | -1.96473 | -2.03928 | 0.093594 | 0.373674 | DOWN | 594.2383 | 594.238  |
| 1602 | M900T33  | 1.856885 | 0.892885 | 1.919453 | 0.093648 | 0.373715 | UP   | 899.6146 | 899.6135 |
| 1603 | M1273T43 | 1.936647 | 0.953561 | 1.920462 | 0.09366  | 0.373725 | UP   | 1272.899 | 1272.897 |
| 1604 | M845T42  | 1.906665 | 0.931051 | 1.904673 | 0.093697 | 0.373752 | UP   | 844.5887 | 844.5878 |
| 1605 | M680T30  | 14.38483 | -3.84648 | -2.18158 | 0.09373  | 0.373777 | DOWN | 680.2712 | 680.2705 |
| 1606 | M432T37  | 2.958909 | 1.565065 | 2.155852 | 0.093742 | 0.373786 | UP   | 432.1701 | 432.1698 |
| 1607 | M349T21_ | 3.132559 | 1.647342 | 1.967844 | 0.093746 | 0.37379  | UP   | 348.6989 | 348.6985 |
| 1608 | M684T30  | 37.47632 | 5.227907 | 2.187553 | 0.093921 | 0.373922 | UP   | 684.3132 | 684.3129 |
| 1609 | M293T43  | 1.458418 | -0.5444  | -1.91409 | 0.094009 | 0.373988 | DOWN | 292.9766 | 292.9762 |
| 1610 | M348T21_ | 2.787614 | 1.479031 | 1.943159 | 0.094074 | 0.374037 | UP   | 348.1959 | 348.1952 |
| 1611 | M659T31_ | 33.57847 | 5.069465 | 2.185075 | 0.094137 | 0.374084 | UP   | 659.4296 | 659.4292 |
| 1612 | M331T34  | 43.48832 | 5.442556 | 2.184209 | 0.09423  | 0.374153 | UP   | 331.1308 | 331.1308 |
| 1613 | M316T28_ | 2.140383 | 1.097869 | 2.013324 | 0.094318 | 0.374219 | UP   | 316.3211 | 316.3207 |
| 1614 | M280T26_ | 7.143427 | -2.83662 | -2.17631 | 0.094327 | 0.374226 | DOWN | 280.0892 | 280.089  |
| 1615 | M349T27_ | 2.702881 | 1.434498 | 1.903861 | 0.094353 | 0.374246 | UP   | 349.1467 | 349.1463 |
| 1616 | M308T22  | 2.577258 | -1.36584 | -1.97845 | 0.094384 | 0.374269 | DOWN | 308.0835 | 308.0831 |
| 1617 | M506T44_ | 2.018292 | 1.013135 | 2.004955 | 0.094536 | 0.374382 | UP   | 506.1177 | 506.1175 |
| 1618 | M668T9   | 29.13343 | -4.8646  | -2.17578 | 0.094669 | 0.374481 | DOWN | 668.4518 | 668.4514 |
| 1619 | M651T40  | 59.50113 | 5.894845 | 2.179092 | 0.094835 | 0.374604 | UP   | 651.4848 | 651.4843 |
| 1620 | M637T11  | 4.998743 | 2.321565 | 2.028539 | 0.094892 | 0.374647 | UP   | 637.3058 | 637.305  |
| 1621 | M363T37  | 1.66498  | -0.7355  | -2.07061 | 0.09492  | 0.374667 | DOWN | 363.1721 | 363.1715 |
| 1622 | M209T31  | 4.15862  | 2.056105 | 1.925757 | 0.094943 | 0.374685 | UP   | 208.571  | 208.571  |
| 1623 | M469T11_ | 19.12825 | 4.257633 | 2.169334 | 0.094982 | 0.374713 | UP   | 469.0247 | 469.0247 |
| 1624 | M431T37_ | 1.271086 | -0.34606 | -1.90054 | 0.095056 | 0.374768 | DOWN | 431.3924 | 431.3915 |
| 1625 | M675T33_ | 14.24928 | 3.832817 | 2.175582 | 0.095123 | 0.374817 | UP   | 675.3718 | 675.3717 |
| 1626 | M459T22_ | 31.80207 | 4.991049 | 2.175383 | 0.095143 | 0.374833 | UP   | 458.913  | 458.9128 |
| 1627 | M786T43  | 1.470859 | 0.556659 | 1.958086 | 0.095172 | 0.374853 | UP   | 785.5825 | 785.5803 |
| 1628 | M347T21_ | 2.733211 | 1.450597 | 1.930944 | 0.095204 | 0.374877 | UP   | 347.1925 | 347.1918 |
| 1629 | M880T45  | 1.591803 | 0.670662 | 1.910714 | 0.095378 | 0.375006 | UP   | 879.6722 | 879.6719 |
| 1630 | M451T43  | 1.753719 | 0.810418 | 2.050961 | 0.095381 | 0.375008 | UP   | 451.434  | 451.4328 |
| 1631 | M347T31_ | 3.053026 | 1.61024  | 1.905129 | 0.095431 | 0.375044 | UP   | 346.6108 | 346.6105 |
| 1632 | M298T31_ | 2.818329 | 1.49484  | 1.894641 | 0.095472 | 0.375075 | UP   | 297.6483 | 297.6478 |
| 1633 | M363T26_ | 35.09211 | 5.133075 | 2.172212 | 0.095511 | 0.375103 | UP   | 363.2172 | 363.217  |
| 1634 | M283T37  | 3.110895 | 1.63733  | 2.169116 | 0.095584 | 0.375156 | UP   | 283.2057 | 283.2056 |
| 1635 | M288T2   | 38.27702 | 5.258407 | 2.170823 | 0.095692 | 0.375235 | UP   | 287.8887 | 287.8882 |
| 1636 | M485T23_ | 8.671873 | -3.11634 | -2.15769 | 0.095692 | 0.375235 | DOWN | 485.0212 | 485.0209 |
| 1637 | M494T31_ | 2.167274 | -1.11588 | -1.91677 | 0.095795 | 0.375311 | DOWN | 494.1392 | 494.1383 |
| 1638 | M482T37  | 2.063275 | -1.04494 | -2.00101 | 0.095846 | 0.375348 | DOWN | 482.1539 | 482.1531 |
| 1639 | M262T21  | 3.071057 | 1.618735 | 1.957906 | 0.095976 | 0.375442 | UP   | 262.0908 | 262.0904 |
| 1640 | M763T30  | 4.092238 | 2.03289  | 1.917552 | 0.096061 | 0.375504 | UP   | 763.0425 | 763.0421 |
| 1641 | M446T9_1 | 5.166537 | -2.3692  | -2.10422 | 0.096139 | 0.375561 | DOWN | 445.6355 | 445.6354 |
| 1642 | M688T39  | 27.07072 | 4.758662 | 2.166335 | 0.096147 | 0.375567 | UP   | 687.5396 | 687.5391 |
| 1643 | M687T39_ | 20.03915 | 4.32475  | 2.165086 | 0.096216 | 0.375616 | UP   | 686.536  | 686.5357 |
| 1644 | M577T26  | 36.84211 | 5.203284 | 2.16605  | 0.096223 | 0.375621 | UP   | 577.3473 | 577.347  |

|      |          |          |          |          |          |          |      |          |          |
|------|----------|----------|----------|----------|----------|----------|------|----------|----------|
| 1645 | M319T26_ | 27.39426 | 4.775802 | 2.164001 | 0.096246 | 0.375638 | UP   | 319.2271 | 319.2267 |
| 1646 | M447T37  | 1.934695 | -0.95211 | -1.89032 | 0.096438 | 0.375777 | DOWN | 447.1167 | 447.1164 |
| 1647 | M463T33_ | 2.545362 | 1.347871 | 1.990502 | 0.096463 | 0.375795 | UP   | 463.3031 | 463.3031 |
| 1648 | M479T21_ | 6.516453 | 2.704087 | 2.159732 | 0.096526 | 0.375841 | UP   | 479.2736 | 479.2732 |
| 1649 | M582T29_ | 4.035318 | -2.01268 | -2.10983 | 0.096556 | 0.375862 | DOWN | 582.253  | 582.2526 |
| 1650 | M470T39  | 2.060444 | -1.04296 | -1.96481 | 0.09673  | 0.375987 | DOWN | 470.3475 | 470.3468 |
| 1651 | M407T10_ | 3.001404 | 1.585637 | 2.085446 | 0.096741 | 0.375995 | UP   | 407.3166 | 407.316  |
| 1652 | M708T10_ | 2.277712 | 1.187585 | 1.888782 | 0.096767 | 0.376014 | UP   | 707.508  | 707.5055 |
| 1653 | M283T31  | 2.744235 | 1.456404 | 2.140722 | 0.096775 | 0.376019 | UP   | 283.206  | 283.2058 |
| 1654 | M380T19  | 3.866619 | 1.951073 | 1.966679 | 0.096893 | 0.376104 | UP   | 380.1004 | 380.1003 |
| 1655 | M894T31  | 22.65953 | 4.502046 | 2.158572 | 0.096998 | 0.37618  | UP   | 894.4966 | 894.4958 |
| 1656 | M384T30  | 11.48236 | 3.521347 | 2.15649  | 0.097066 | 0.376228 | UP   | 384.2815 | 384.2746 |
| 1657 | M474T37  | 5.211237 | 2.381626 | 2.146226 | 0.097432 | 0.376488 | UP   | 474.1701 | 474.1697 |
| 1658 | M724T11  | 5.959263 | 2.575134 | 2.058305 | 0.097454 | 0.376504 | UP   | 724.2182 | 724.2177 |
| 1659 | M523T23  | 6.809548 | -2.76756 | -2.1264  | 0.09757  | 0.376586 | DOWN | 523.1302 | 523.1295 |
| 1660 | M372T37_ | 4.04369  | 2.015672 | 2.14465  | 0.097676 | 0.376661 | UP   | 372.2016 | 372.2015 |
| 1661 | M599T33  | 6.880548 | 2.782524 | 2.115853 | 0.097707 | 0.376683 | UP   | 599.1069 | 599.1064 |
| 1662 | M743T31  | 3.788599 | 1.921665 | 1.877414 | 0.097747 | 0.376711 | UP   | 742.8754 | 742.875  |
| 1663 | M349T21_ | 3.223083 | 1.688441 | 1.954871 | 0.097879 | 0.376804 | UP   | 349.0777 | 349.0768 |
| 1664 | M349T21_ | 2.949976 | 1.560703 | 1.931467 | 0.097881 | 0.376805 | UP   | 349.1993 | 349.1984 |
| 1665 | M317T28_ | 2.29     | 1.195348 | 2.004507 | 0.097901 | 0.37682  | UP   | 317.3245 | 317.324  |
| 1666 | M379T44_ | 1.943595 | 0.958728 | 1.912247 | 0.098031 | 0.376911 | UP   | 379.1543 | 379.1542 |
| 1667 | M595T10_ | 3.282369 | 1.714738 | 2.104368 | 0.098064 | 0.376934 | UP   | 595.4547 | 595.453  |
| 1668 | M638T24  | 4.514056 | 2.174424 | 1.954673 | 0.098112 | 0.376968 | UP   | 638.1184 | 638.1179 |
| 1669 | M345T21  | 3.225204 | 1.689391 | 1.950614 | 0.098138 | 0.376987 | UP   | 345.3226 | 345.3218 |
| 1670 | M420T16  | 10.18858 | 3.34888  | 2.114778 | 0.098152 | 0.376996 | UP   | 420.045  | 420.0449 |
| 1671 | M641T33  | 67.35647 | 6.073745 | 2.148043 | 0.098188 | 0.377021 | UP   | 641.0287 | 641.0277 |
| 1672 | M523T31_ | 3.709179 | 1.8911   | 1.876699 | 0.098248 | 0.377063 | UP   | 523.0191 | 523.0188 |
| 1673 | M394T30_ | 3.896932 | 1.962339 | 1.906648 | 0.098424 | 0.377187 | UP   | 394.1082 | 394.1078 |
| 1674 | M323T28_ | 2.368779 | 1.244144 | 2.055048 | 0.098596 | 0.377306 | UP   | 323.1308 | 323.1307 |
| 1675 | M513T38  | 3.287711 | 1.717083 | 1.871837 | 0.098598 | 0.377307 | UP   | 513.1193 | 513.1188 |
| 1676 | M417T37  | 3.486428 | 1.80175  | 2.111424 | 0.09861  | 0.377316 | UP   | 417.1948 | 417.1948 |
| 1677 | M697T33  | 16.24915 | 4.022293 | 2.142913 | 0.098661 | 0.377351 | UP   | 697.3972 | 697.397  |
| 1678 | M1098T44 | 1.729628 | 0.790461 | 1.868853 | 0.098733 | 0.377402 | UP   | 1097.797 | 1097.795 |
| 1679 | M361T13  | 2.942312 | 1.55695  | 1.873501 | 0.098836 | 0.377473 | UP   | 361.172  | 361.1718 |
| 1680 | M297T11  | 2.475796 | 1.307892 | 2.048222 | 0.098884 | 0.377506 | UP   | 297.1855 | 297.1846 |
| 1681 | M737T41_ | 3.176173 | 1.66729  | 2.014103 | 0.098918 | 0.37753  | UP   | 737.2309 | 737.229  |
| 1682 | M529T31_ | 157.6059 | 7.300178 | 2.140419 | 0.099038 | 0.377612 | UP   | 529.0676 | 529.0665 |
| 1683 | M389T37  | 3.44833  | 1.785898 | 2.133431 | 0.099213 | 0.377733 | UP   | 389.1619 | 389.1618 |
| 1684 | M287T2   | 1272.318 | 10.31324 | 2.138311 | 0.099276 | 0.377777 | UP   | 286.8919 | 286.8916 |
| 1685 | M334T32_ | 71.56711 | 6.161225 | 2.137953 | 0.099297 | 0.377792 | UP   | 333.9679 | 333.9678 |
| 1686 | M513T22_ | 43.03797 | 5.427538 | 2.136635 | 0.099375 | 0.377845 | UP   | 513.0875 | 513.0871 |
| 1687 | M363T24  | 52.85638 | 5.724006 | 2.136333 | 0.099483 | 0.377919 | UP   | 363.2169 | 363.2166 |
| 1688 | M854T23  | 17.69279 | 4.145089 | 2.13205  | 0.099552 | 0.377966 | UP   | 854.3554 | 854.3553 |
| 1689 | M591T31_ | 22.53398 | 4.49403  | 2.133648 | 0.099699 | 0.378067 | UP   | 591.0988 | 591.0983 |
| 1690 | M307T2   | 376.7824 | 8.557588 | 2.134475 | 0.099705 | 0.378071 | UP   | 306.892  | 306.8918 |
| 1691 | M403T38  | 1.608116 | -0.68537 | -1.99965 | 0.099715 | 0.378078 | DOWN | 403.18   | 403.1799 |

|      |          |          |          |          |          |          |      |          |          |
|------|----------|----------|----------|----------|----------|----------|------|----------|----------|
| 1692 | M276T30  | 2.243454 | 1.165721 | 2.050754 | 0.099734 | 0.378091 | UP   | 276.2043 | 276.2039 |
| 1693 | M553T39  | 62.07069 | 5.95584  | 2.133473 | 0.099815 | 0.378146 | UP   | 553.1184 | 553.118  |
| 1694 | M412T23_ | 3.808463 | 1.929209 | 1.931922 | 0.099947 | 0.378236 | UP   | 412.0145 | 412.0143 |
| 1695 | M1009T31 | 109.2564 | 6.771574 | 2.131978 | 0.099979 | 0.378258 | UP   | 1009.153 | 1009.153 |
| 1696 | M697T10_ | 74.59435 | 6.220995 | 2.13085  | 0.100031 | 0.378293 | UP   | 697.301  | 697.3006 |
| 1697 | M367T30_ | 6.752323 | 2.755384 | 2.128192 | 0.100067 | 0.378317 | UP   | 367.2482 | 367.248  |
| 1698 | M293T31_ | 3.348427 | 1.743484 | 1.867544 | 0.100332 | 0.378497 | UP   | 293.1385 | 293.1384 |
| 1699 | M318T15  | 5.294656 | 2.404537 | 2.073574 | 0.100403 | 0.378545 | UP   | 318.0428 | 318.0427 |
| 1700 | M1358T10 | 2.450037 | 1.292804 | 1.953722 | 0.100636 | 0.378702 | UP   | 1358.022 | 1358.017 |
| 1701 | M591T26_ | 3.218966 | 1.686598 | 1.864563 | 0.100671 | 0.378726 | UP   | 590.864  | 590.8636 |
| 1702 | M415T30  | 3.595201 | 1.846073 | 1.881894 | 0.100768 | 0.378791 | UP   | 415.0689 | 415.0685 |
| 1703 | M678T30  | 11.46075 | -3.51863 | -2.11163 | 0.100815 | 0.378823 | DOWN | 678.2745 | 678.2741 |
| 1704 | M379T16  | 8.57249  | 3.099714 | 2.070992 | 0.101352 | 0.379182 | UP   | 379.0184 | 379.0182 |
| 1705 | M377T22  | 2.789246 | 1.479875 | 1.87454  | 0.101422 | 0.379228 | UP   | 376.9988 | 376.9982 |
| 1706 | M172T3   | 4.702257 | 2.233353 | 2.101429 | 0.101514 | 0.379289 | UP   | 171.9817 | 171.9817 |
| 1707 | M710T9_3 | 78.50911 | -6.29479 | -2.11778 | 0.101568 | 0.379325 | DOWN | 709.9351 | 709.9345 |
| 1708 | M368T43  | 1.746377 | 0.804365 | 2.074983 | 0.101692 | 0.379407 | UP   | 368.3523 | 368.3517 |
| 1709 | M515T31  | 8.689043 | -3.1192  | -2.08997 | 0.101771 | 0.379459 | DOWN | 515.3125 | 515.3117 |
| 1710 | M478T2   | 111.6232 | 6.802493 | 2.114562 | 0.101915 | 0.379554 | UP   | 477.8225 | 477.8221 |
| 1711 | M911T31  | 112.5805 | 6.814813 | 2.113908 | 0.102034 | 0.379633 | UP   | 911.2285 | 911.2284 |
| 1712 | M699T33  | 9.921221 | 3.310518 | 2.104735 | 0.102115 | 0.379686 | UP   | 699.3936 | 699.3934 |
| 1713 | M268T31_ | 1.954231 | -0.9666  | -1.84674 | 0.102178 | 0.379727 | DOWN | 267.647  | 267.6464 |
| 1714 | M1216T44 | 2.263557 | 1.178592 | 1.991286 | 0.102192 | 0.379736 | UP   | 1215.732 | 1215.731 |
| 1715 | M369T19  | 2.63484  | 1.397715 | 2.095743 | 0.102325 | 0.379823 | UP   | 369.2369 | 369.2368 |
| 1716 | M557T44  | 1.249155 | 0.320952 | 1.844283 | 0.102448 | 0.379904 | UP   | 557.4131 | 557.4122 |
| 1717 | M608T31_ | 3.764124 | -1.91231 | -2.02132 | 0.102463 | 0.379914 | DOWN | 608.2686 | 608.2675 |
| 1718 | M718T31  | 37.90468 | -5.2443  | -2.10722 | 0.102607 | 0.380007 | DOWN | 718.1692 | 718.1686 |
| 1719 | M624T11_ | 8.516276 | 3.090223 | 2.062894 | 0.10264  | 0.380029 | UP   | 624.2928 | 624.2927 |
| 1720 | M529T31_ | 3.276101 | 1.71198  | 1.852578 | 0.102801 | 0.380134 | UP   | 529.0101 | 529.0099 |
| 1721 | M404T23  | 3.32246  | 1.732252 | 2.030841 | 0.102831 | 0.380153 | UP   | 404.2198 | 404.2191 |
| 1722 | M691T39  | 60.28918 | 5.913827 | 2.106951 | 0.102839 | 0.380158 | UP   | 691.4913 | 691.4912 |
| 1723 | M481T37  | 1.977975 | -0.98402 | -2.00011 | 0.102848 | 0.380165 | DOWN | 481.1558 | 481.1553 |
| 1724 | M341T17  | 10.95501 | 3.453519 | 2.081678 | 0.102883 | 0.380187 | UP   | 341.0896 | 341.0894 |
| 1725 | M877T45  | 1.417023 | 0.502863 | 1.846396 | 0.10295  | 0.380231 | UP   | 876.6628 | 876.6606 |
| 1726 | M738T41_ | 2.964797 | 1.567933 | 1.967263 | 0.103005 | 0.380266 | UP   | 738.2342 | 738.233  |
| 1727 | M274T12  | 2.055694 | 1.039625 | 1.945793 | 0.103112 | 0.380335 | UP   | 274.0842 | 274.0835 |
| 1728 | M333T24  | 3.109368 | 1.636621 | 1.986084 | 0.103156 | 0.380364 | UP   | 333.1527 | 333.1526 |
| 1729 | M460T36  | 2.836431 | 1.504077 | 2.089962 | 0.10322  | 0.380405 | UP   | 460.2654 | 460.2654 |
| 1730 | M756T43_ | 1.408811 | 0.494478 | 1.880322 | 0.10324  | 0.380418 | UP   | 755.5319 | 755.5304 |
| 1731 | M307T33  | 4.557528 | 2.188252 | 2.072559 | 0.103364 | 0.380498 | UP   | 307.1907 | 307.1906 |
| 1732 | M628T29_ | 2.775943 | -1.47298 | -1.95294 | 0.103372 | 0.380503 | DOWN | 628.2588 | 628.2582 |
| 1733 | M338T29_ | 3.246294 | 1.698794 | 1.842987 | 0.103416 | 0.380532 | UP   | 337.5959 | 337.5957 |
| 1734 | M361T29_ | 3.250698 | 1.700749 | 1.846974 | 0.103664 | 0.380691 | UP   | 360.5983 | 360.5982 |
| 1735 | M408T34  | 1.60771  | -0.68501 | -1.84148 | 0.103676 | 0.380699 | DOWN | 408.2018 | 408.2018 |
| 1736 | M790T37  | 20.60427 | 4.364871 | 2.096448 | 0.103721 | 0.380728 | UP   | 789.6139 | 789.613  |
| 1737 | M371T42  | 1.39376  | 0.478982 | 1.852179 | 0.103741 | 0.38074  | UP   | 371.1537 | 371.1536 |
| 1738 | M370T11  | 4.384109 | 2.132284 | 2.002785 | 0.10375  | 0.380746 | UP   | 370.2129 | 370.2126 |

|      |          |          |          |          |          |          |      |          |          |
|------|----------|----------|----------|----------|----------|----------|------|----------|----------|
| 1739 | M696T33  | 10.10411 | 3.33687  | 2.096403 | 0.103791 | 0.380772 | UP   | 696.4014 | 696.4005 |
| 1740 | M509T31_ | 2.946486 | 1.558995 | 1.839227 | 0.103858 | 0.380815 | UP   | 509.0418 | 509.0409 |
| 1741 | M378T22_ | 2.388286 | 1.255975 | 1.873332 | 0.103884 | 0.380832 | UP   | 378.1344 | 378.1338 |
| 1742 | M698T31  | 2.833842 | 1.502759 | 1.855513 | 0.10397  | 0.380886 | UP   | 698.19   | 698.1889 |
| 1743 | M492T23  | 1.571131 | -0.6518  | -1.93349 | 0.104003 | 0.380908 | DOWN | 492.2942 | 492.2941 |
| 1744 | M349T16  | 4.32669  | 2.113264 | 2.041973 | 0.104024 | 0.380921 | UP   | 349.2207 | 349.2201 |
| 1745 | M529T33_ | 94.40238 | 6.560751 | 2.095681 | 0.10414  | 0.380995 | UP   | 529.0866 | 529.086  |
| 1746 | M381T21_ | 2.418498 | 1.274111 | 1.897634 | 0.104161 | 0.381008 | UP   | 381.1537 | 381.1536 |
| 1747 | M587T37  | 86.84473 | 6.440366 | 2.095399 | 0.104188 | 0.381025 | UP   | 587.0919 | 587.0917 |
| 1748 | M335T32_ | 69.88467 | 6.126904 | 2.09473  | 0.104199 | 0.381032 | UP   | 334.9604 | 334.9604 |
| 1749 | M525T43_ | 1.175836 | 0.233686 | 1.852828 | 0.104208 | 0.381038 | UP   | 524.7084 | 524.7073 |
| 1750 | M628T29_ | 3.209508 | -1.68235 | -1.97779 | 0.104438 | 0.381184 | DOWN | 628.2927 | 628.2916 |
| 1751 | M386T31_ | 3.102826 | 1.633583 | 1.913716 | 0.104577 | 0.381272 | UP   | 385.5634 | 385.5632 |
| 1752 | M568T31_ | 3.688226 | 1.882927 | 1.837397 | 0.104653 | 0.38132  | UP   | 568.0408 | 568.0403 |
| 1753 | M416T28  | 6.931486 | 2.793165 | 2.089851 | 0.104728 | 0.381367 | UP   | 416.2698 | 416.2697 |
| 1754 | M525T23_ | 2.296397 | 1.199372 | 1.83155  | 0.104809 | 0.381418 | UP   | 525.3803 | 525.3787 |
| 1755 | M763T31_ | 36.66777 | 5.196441 | 2.088827 | 0.10491  | 0.381481 | UP   | 763.2978 | 763.2977 |
| 1756 | M965T31  | 2.687119 | 1.42606  | 1.842666 | 0.105212 | 0.381671 | UP   | 964.7158 | 964.7149 |
| 1757 | M961T10  | 4.607709 | 2.20405  | 1.935969 | 0.105314 | 0.381735 | UP   | 960.5981 | 960.5974 |
| 1758 | M536T44_ | 1.254556 | 0.327176 | 1.830736 | 0.105367 | 0.381768 | UP   | 536.4032 | 536.4022 |
| 1759 | M225T24  | 2.336685 | 1.224463 | 2.062892 | 0.105547 | 0.38188  | UP   | 225.1123 | 225.1122 |
| 1760 | M564T9_1 | 9.597484 | -3.26266 | -2.06354 | 0.105777 | 0.382022 | DOWN | 564.2615 | 564.2611 |
| 1761 | M306T13_ | 3.377234 | -1.75584 | -1.8818  | 0.105788 | 0.38203  | DOWN | 306.1043 | 306.1041 |
| 1762 | M372T37_ | 2.341972 | -1.22772 | -1.97933 | 0.105792 | 0.382032 | DOWN | 372.1006 | 372.1001 |
| 1763 | M290T29_ | 3.145944 | 1.653493 | 1.823413 | 0.105906 | 0.382103 | UP   | 289.6405 | 289.6404 |
| 1764 | M150T17  | 2.376236 | 1.248678 | 1.823466 | 0.106007 | 0.382165 | UP   | 150.0266 | 150.0264 |
| 1765 | M789T37  | 19.6614  | 4.297294 | 2.076433 | 0.106108 | 0.382227 | UP   | 788.6105 | 788.6096 |
| 1766 | M290T31  | 3.316388 | 1.729613 | 1.82072  | 0.106135 | 0.382244 | UP   | 289.9747 | 289.9746 |
| 1767 | M702T10_ | 4.890973 | 2.290121 | 2.008499 | 0.106211 | 0.38229  | UP   | 701.5571 | 701.555  |
| 1768 | M366T26_ | 5.078076 | 2.344282 | 2.075709 | 0.106332 | 0.382365 | UP   | 366.2361 | 366.2359 |
| 1769 | M1230T43 | 1.885176 | 0.9147   | 1.846421 | 0.106405 | 0.38241  | UP   | 1229.877 | 1229.875 |
| 1770 | M738T31  | 338.2839 | 8.40209  | 2.076784 | 0.106409 | 0.382412 | UP   | 737.9409 | 737.9405 |
| 1771 | M380T39_ | 34.69905 | 5.116824 | 2.076532 | 0.10642  | 0.382419 | UP   | 380.316  | 380.3158 |
| 1772 | M451T30_ | 1.890435 | 0.918718 | 1.863305 | 0.106469 | 0.382449 | UP   | 451.1621 | 451.1616 |
| 1773 | M622T38  | 90.80682 | 6.504729 | 2.076133 | 0.106477 | 0.382454 | UP   | 622.4637 | 622.4633 |
| 1774 | M400T10_ | 3.000435 | 1.585172 | 1.858369 | 0.10654  | 0.382493 | UP   | 399.9362 | 399.9349 |
| 1775 | M200T22_ | 1.754807 | 0.811312 | 1.875057 | 0.106556 | 0.382503 | UP   | 200.0006 | 200.0005 |
| 1776 | M499T31_ | 2.074374 | -1.05268 | -1.84384 | 0.106591 | 0.382524 | DOWN | 499.3478 | 499.3469 |
| 1777 | M563T18_ | 2.957875 | 1.564561 | 1.843931 | 0.106776 | 0.382637 | UP   | 562.8328 | 562.8321 |
| 1778 | M576T26_ | 12.36979 | 3.628749 | 2.072479 | 0.106795 | 0.382648 | UP   | 576.3439 | 576.3436 |
| 1779 | M524T19  | 24.03587 | 4.587117 | 2.070446 | 0.106836 | 0.382673 | UP   | 524.0303 | 524.0302 |
| 1780 | M299T30_ | 2.308724 | -1.2071  | -1.88339 | 0.106969 | 0.382754 | DOWN | 299.3138 | 299.3135 |
| 1781 | M522T11_ | 4.218798 | 2.076832 | 2.006158 | 0.107006 | 0.382777 | UP   | 522.1918 | 522.1902 |
| 1782 | M377T31_ | 3.42109  | 1.774456 | 1.818323 | 0.107025 | 0.382789 | UP   | 377.0889 | 377.0885 |
| 1783 | M528T31_ | 3.420601 | -1.77425 | -2.04848 | 0.107096 | 0.382832 | DOWN | 528.2934 | 528.293  |
| 1784 | M648T30  | 1.414767 | 0.500565 | 1.896566 | 0.107146 | 0.382862 | UP   | 648.4402 | 648.4395 |
| 1785 | M319T26_ | 9.776358 | -3.2893  | -2.06219 | 0.107161 | 0.382871 | DOWN | 319.1172 | 319.1167 |

|      |          |          |          |          |          |          |      |          |          |
|------|----------|----------|----------|----------|----------|----------|------|----------|----------|
| 1786 | M391T34_ | 7.680547 | 2.941209 | 2.03191  | 0.107314 | 0.382964 | UP   | 391.1044 | 391.1042 |
| 1787 | M297T31_ | 2.51307  | 1.329451 | 1.816208 | 0.107356 | 0.382989 | UP   | 297.1466 | 297.1461 |
| 1788 | M549T22_ | 5.649369 | 2.49809  | 1.939449 | 0.10769  | 0.383191 | UP   | 548.8539 | 548.8527 |
| 1789 | M693T22  | 21.65829 | 4.436848 | 2.062331 | 0.107696 | 0.383195 | UP   | 693.2038 | 693.2034 |
| 1790 | M684T13  | 3.306353 | 1.725241 | 1.84102  | 0.107846 | 0.383284 | UP   | 683.5311 | 683.5291 |
| 1791 | M205T11  | 29.11523 | 4.863702 | 2.062294 | 0.107849 | 0.383286 | UP   | 205.0161 | 205.0157 |
| 1792 | M683T31  | 827.8496 | 9.693225 | 2.063829 | 0.107983 | 0.383366 | UP   | 683.3093 | 683.3091 |
| 1793 | M748T19_ | 2.491153 | 1.316813 | 1.816508 | 0.108072 | 0.38342  | UP   | 747.5441 | 747.5437 |
| 1794 | M444T30_ | 1.280952 | 0.357217 | 1.828441 | 0.108076 | 0.383422 | UP   | 444.3321 | 444.3314 |
| 1795 | M700T30  | 36.73299 | -5.199   | -2.06153 | 0.108237 | 0.383518 | DOWN | 700.2561 | 700.2561 |
| 1796 | M347T31_ | 3.002586 | 1.586205 | 1.857185 | 0.108238 | 0.383519 | UP   | 347.1091 | 347.1089 |
| 1797 | M766T10  | 3.599607 | 1.847839 | 1.941566 | 0.108377 | 0.383602 | UP   | 765.5876 | 765.5861 |
| 1798 | M261T11  | 25.95655 | 4.698027 | 2.055546 | 0.108537 | 0.383697 | UP   | 261.0787 | 261.0776 |
| 1799 | M405T22_ | 5.024505 | 2.328982 | 1.935145 | 0.108572 | 0.383718 | UP   | 404.9937 | 404.9932 |
| 1800 | M417T17_ | 64.89713 | 6.020083 | 2.058898 | 0.108585 | 0.383725 | UP   | 417.1034 | 417.1006 |
| 1801 | M966T44  | 1.490541 | 0.575836 | 1.825253 | 0.108623 | 0.383748 | UP   | 965.7186 | 965.717  |
| 1802 | M469T9   | 2.718527 | -1.44283 | -1.93944 | 0.108858 | 0.383887 | DOWN | 469.3384 | 469.3372 |
| 1803 | M482T23  | 8.024328 | -3.00438 | -2.04953 | 0.108868 | 0.383893 | DOWN | 482.0213 | 482.0204 |
| 1804 | M418T44_ | 1.415101 | 0.500905 | 1.844327 | 0.108872 | 0.383895 | UP   | 418.2431 | 418.2428 |
| 1805 | M655T30  | 7.147436 | -2.83743 | -1.97598 | 0.108876 | 0.383898 | DOWN | 655.3111 | 655.3103 |
| 1806 | M379T41  | 1.796546 | 0.845226 | 1.806207 | 0.108953 | 0.383944 | UP   | 379.2045 | 379.2039 |
| 1807 | M642T16  | 4.856766 | 2.279996 | 2.050344 | 0.108956 | 0.383945 | UP   | 642.3064 | 642.3061 |
| 1808 | M522T11_ | 2.672576 | 1.418231 | 1.938083 | 0.109004 | 0.383974 | UP   | 522.1561 | 522.1555 |
| 1809 | M626T23  | 3.665148 | 1.873871 | 1.988298 | 0.10903  | 0.383989 | UP   | 626.3231 | 626.3231 |
| 1810 | M601T44  | 1.227486 | 0.295707 | 1.806606 | 0.109148 | 0.384058 | UP   | 601.4398 | 601.4387 |
| 1811 | M803T10  | 2.061337 | 1.04358  | 1.808462 | 0.109253 | 0.38412  | UP   | 802.5272 | 802.5236 |
| 1812 | M484T23_ | 7.938364 | -2.98884 | -2.04701 | 0.109334 | 0.384168 | DOWN | 484.0182 | 484.0173 |
| 1813 | M566T18_ | 4.329409 | 2.11417  | 1.89978  | 0.10946  | 0.384241 | UP   | 565.8569 | 565.8565 |
| 1814 | M338T39_ | 29.42334 | 4.878889 | 2.050734 | 0.109491 | 0.384259 | UP   | 337.697  | 337.697  |
| 1815 | M183T19  | 2.721077 | 1.444178 | 1.837926 | 0.109507 | 0.384269 | UP   | 182.9853 | 182.985  |
| 1816 | M480T19  | 3.658957 | 1.871433 | 1.939543 | 0.109562 | 0.384301 | UP   | 480.3596 | 480.3595 |
| 1817 | M350T21_ | 3.689882 | 1.883575 | 1.902057 | 0.109585 | 0.384315 | UP   | 350.0895 | 350.0892 |
| 1818 | M623T11_ | 8.212048 | 3.037742 | 2.002662 | 0.1096   | 0.384324 | UP   | 623.2897 | 623.2883 |
| 1819 | M432T11_ | 3.031488 | 1.600026 | 1.841399 | 0.1096   | 0.384324 | UP   | 431.8417 | 431.84   |
| 1820 | M641T11  | 2.178786 | 1.123524 | 1.819712 | 0.109601 | 0.384324 | UP   | 641.4137 | 641.4136 |
| 1821 | M369T25_ | 2.748733 | 1.458767 | 1.89251  | 0.10963  | 0.384341 | UP   | 369.0128 | 369.0125 |
| 1822 | M250T16  | 3.322508 | -1.73227 | -2.00876 | 0.109643 | 0.384349 | DOWN | 250.0591 | 250.0589 |
| 1823 | M596T9   | 91.90829 | -6.52212 | -2.04969 | 0.109701 | 0.384382 | DOWN | 596.0613 | 596.0603 |
| 1824 | M902T11  | 7.869869 | 2.97634  | 2.007642 | 0.109795 | 0.384437 | UP   | 901.5615 | 901.5604 |
| 1825 | M424T38  | 2.08582  | 1.060615 | 1.800514 | 0.109926 | 0.384513 | UP   | 424.406  | 424.4055 |
| 1826 | M270T18  | 1.95365  | -0.96617 | -1.86507 | 0.109959 | 0.384532 | DOWN | 270.1016 | 270.1009 |
| 1827 | M346T31_ | 3.133725 | 1.647879 | 1.836718 | 0.109969 | 0.384539 | UP   | 346.1089 | 346.1089 |
| 1828 | M673T32_ | 9.12781  | 3.190269 | 2.043217 | 0.110004 | 0.384559 | UP   | 673.2499 | 673.2492 |
| 1829 | M478T11_ | 2.598867 | 1.377883 | 1.798354 | 0.110104 | 0.384617 | UP   | 478.155  | 478.1532 |
| 1830 | M646T43_ | 1.268366 | 0.342971 | 1.797092 | 0.110186 | 0.384664 | UP   | 645.9678 | 645.9664 |
| 1831 | M838T11  | 4.499558 | 2.169783 | 1.867078 | 0.110197 | 0.384671 | UP   | 838.3628 | 838.3601 |
| 1832 | M710T9_4 | 71.79123 | -6.16574 | -2.04575 | 0.110201 | 0.384673 | DOWN | 710.0781 | 710.0779 |

|      |          |          |          |          |          |          |      |          |          |
|------|----------|----------|----------|----------|----------|----------|------|----------|----------|
| 1833 | M303T31_ | 2.921795 | 1.546855 | 1.950697 | 0.11026  | 0.384707 | UP   | 303.2235 | 303.2234 |
| 1834 | M350T29_ | 3.211383 | 1.683195 | 1.802258 | 0.110333 | 0.384749 | UP   | 349.5958 | 349.5953 |
| 1835 | M516T31  | 9.798301 | -3.29253 | -2.01627 | 0.110416 | 0.384797 | DOWN | 515.8139 | 515.8135 |
| 1836 | M681T31  | 20.49942 | 4.357512 | 2.042902 | 0.110491 | 0.38484  | UP   | 681.0023 | 681.002  |
| 1837 | M340T17  | 5.402266 | 2.433565 | 1.926486 | 0.110495 | 0.384843 | UP   | 340.0927 | 340.0924 |
| 1838 | M616T23  | 3.730661 | 1.899431 | 1.819031 | 0.110497 | 0.384844 | UP   | 616.0654 | 616.0646 |
| 1839 | M420T22_ | 8.138008 | -3.02468 | -2.01592 | 0.11057  | 0.384886 | DOWN | 419.9977 | 419.9973 |
| 1840 | M281T7   | 6.498746 | -2.70016 | -2.01728 | 0.11067  | 0.384943 | DOWN | 281.0667 | 281.0664 |
| 1841 | M422T22_ | 4.283014 | -2.09863 | -2.03691 | 0.110811 | 0.385025 | DOWN | 422.2061 | 422.2057 |
| 1842 | M486T23  | 10.7195  | -3.42217 | -2.03279 | 0.110977 | 0.38512  | DOWN | 486.0167 | 486.016  |
| 1843 | M328T18  | 2.079478 | 1.056221 | 1.820704 | 0.111113 | 0.385197 | UP   | 328.2485 | 328.2479 |
| 1844 | M715T23  | 3.099572 | 1.632069 | 1.790551 | 0.111158 | 0.385223 | UP   | 714.9871 | 714.9862 |
| 1845 | M430T29  | 2.735898 | 1.452015 | 1.998525 | 0.111171 | 0.385231 | UP   | 430.1674 | 430.1673 |
| 1846 | M683T29_ | 208.2217 | 7.701977 | 2.038127 | 0.111179 | 0.385235 | UP   | 683.3096 | 683.3092 |
| 1847 | M375T38  | 4.866508 | -2.28289 | -2.02455 | 0.111184 | 0.385238 | DOWN | 375.1796 | 375.1791 |
| 1848 | M267T24  | 2.009274 | 1.006675 | 1.803094 | 0.111217 | 0.385257 | UP   | 267.1593 | 267.1592 |
| 1849 | M429T16_ | 10.15473 | 3.34408  | 2.00505  | 0.111326 | 0.385319 | UP   | 428.9934 | 428.9933 |
| 1850 | M525T16  | 12.60687 | 3.656138 | 2.013661 | 0.111364 | 0.38534  | UP   | 524.9487 | 524.9478 |
| 1851 | M674T31  | 3.390306 | 1.761415 | 1.788919 | 0.111429 | 0.385378 | UP   | 674.2269 | 674.2265 |
| 1852 | M403T23  | 21.36096 | 4.416905 | 2.035018 | 0.111435 | 0.385381 | UP   | 403.2095 | 403.2094 |
| 1853 | M674T10_ | 4.019909 | 2.007163 | 1.971393 | 0.111438 | 0.385382 | UP   | 674.4003 | 674.398  |
| 1854 | M644T29  | 32.29151 | -5.01308 | -2.03556 | 0.111441 | 0.385384 | DOWN | 644.2264 | 644.2262 |
| 1855 | M386T10  | 3.199097 | 1.677665 | 1.87893  | 0.111633 | 0.385493 | UP   | 386.0417 | 386.0405 |
| 1856 | M361T29_ | 5.45775  | 2.448306 | 1.999102 | 0.111736 | 0.385552 | UP   | 361.2014 | 361.2011 |
| 1857 | M585T24  | 3.199158 | 1.677692 | 1.786831 | 0.111784 | 0.385579 | UP   | 584.981  | 584.9801 |
| 1858 | M734T43_ | 1.413661 | 0.499436 | 1.7869   | 0.111816 | 0.385597 | UP   | 733.5186 | 733.5172 |
| 1859 | M357T39_ | 2.189642 | -1.13069 | -1.85272 | 0.112102 | 0.385758 | DOWN | 357.3    | 357.2996 |
| 1860 | M417T25_ | 6.289065 | 2.652846 | 1.99835  | 0.112195 | 0.38581  | UP   | 417.2732 | 417.273  |
| 1861 | M475T39  | 2.802894 | 1.486917 | 1.90796  | 0.112212 | 0.38582  | UP   | 475.2354 | 475.2345 |
| 1862 | M757T29_ | 2120.702 | 11.05033 | 2.029576 | 0.112267 | 0.385851 | UP   | 757.3468 | 757.346  |
| 1863 | M737T33  | 57.10264 | 5.835485 | 2.027864 | 0.112406 | 0.385929 | UP   | 736.958  | 736.9577 |
| 1864 | M227T9_2 | 6.139171 | 2.618044 | 1.958863 | 0.112494 | 0.385978 | UP   | 227.1947 | 227.1942 |
| 1865 | M204T12  | 7.572442 | 2.920759 | 2.01672  | 0.112511 | 0.385988 | UP   | 204.1385 | 204.1383 |
| 1866 | M224T17  | 2.476251 | 1.308158 | 1.811567 | 0.112564 | 0.386017 | UP   | 224.1    | 224.0995 |
| 1867 | M747T19_ | 2.353941 | 1.235078 | 1.792483 | 0.112608 | 0.386042 | UP   | 746.5409 | 746.5392 |
| 1868 | M259T4   | 14.57236 | 3.865163 | 2.019275 | 0.112693 | 0.386089 | UP   | 258.9601 | 258.9599 |
| 1869 | M463T26_ | 3.099094 | 1.631847 | 1.807722 | 0.112728 | 0.386109 | UP   | 462.944  | 462.9438 |
| 1870 | M723T11  | 7.932708 | 2.987813 | 1.963214 | 0.112808 | 0.386153 | UP   | 723.2155 | 723.2143 |
| 1871 | M296T31_ | 2.827118 | 1.499332 | 1.801751 | 0.112845 | 0.386174 | UP   | 296.1465 | 296.1459 |
| 1872 | M478T22_ | 4.40088  | 2.137792 | 1.877773 | 0.112908 | 0.386209 | UP   | 478.0286 | 478.0285 |
| 1873 | M710T9_5 | 38.63247 | -5.27174 | -2.02384 | 0.112958 | 0.386236 | DOWN | 710.2215 | 710.2206 |
| 1874 | M831T35  | 4.404153 | 2.138865 | 1.923958 | 0.113109 | 0.38632  | UP   | 830.6214 | 830.6209 |
| 1875 | M463T18  | 3.035121 | 1.601754 | 1.820102 | 0.113141 | 0.386338 | UP   | 462.9079 | 462.9073 |
| 1876 | M511T38  | 4.329398 | 2.114166 | 1.818981 | 0.113313 | 0.386433 | UP   | 511.1189 | 511.1187 |
| 1877 | M420T33_ | 1.879689 | 0.910494 | 1.931791 | 0.113583 | 0.386582 | UP   | 420.1844 | 420.1843 |
| 1878 | M495T25  | 4.96793  | 2.312645 | 1.920752 | 0.113702 | 0.386648 | UP   | 495.0404 | 495.0393 |
| 1879 | M394T23_ | 2.316271 | 1.211804 | 1.785479 | 0.113748 | 0.386673 | UP   | 394.2869 | 394.2865 |



|      |          |          |          |          |          |          |      |          |          |
|------|----------|----------|----------|----------|----------|----------|------|----------|----------|
| 1880 | M531T36  | 1.91007  | -0.93363 | -1.81295 | 0.113791 | 0.386697 | DOWN | 531.3521 | 531.3511 |
| 1881 | M687T39_ | 4.280528 | 2.097789 | 1.984369 | 0.113898 | 0.386755 | UP   | 686.5199 | 686.5197 |
| 1882 | M420T31  | 2.628581 | 1.394284 | 1.796609 | 0.113904 | 0.386759 | UP   | 420.0873 | 420.0868 |
| 1883 | M294T21  | 3.24643  | 1.698854 | 1.8622   | 0.11402  | 0.386822 | UP   | 294.0808 | 294.0804 |
| 1884 | M589T33  | 80.22373 | 6.325957 | 2.015684 | 0.114048 | 0.386838 | UP   | 589.0797 | 589.0795 |
| 1885 | M793T33  | 118.1708 | 6.884729 | 2.014825 | 0.114162 | 0.3869   | UP   | 793.328  | 793.3277 |
| 1886 | M355T28_ | 2.934223 | -1.55298 | -2.0131  | 0.114178 | 0.386908 | DOWN | 355.1459 | 355.1455 |
| 1887 | M1727T9  | 5.985984 | 2.581588 | 1.924188 | 0.114186 | 0.386913 | UP   | 1726.743 | 1726.741 |
| 1888 | M656T29_ | 10.03816 | -3.32742 | -1.97734 | 0.114321 | 0.386986 | DOWN | 656.2538 | 656.2535 |
| 1889 | M176T17_ | 3.949953 | 1.981835 | 1.88241  | 0.114325 | 0.386989 | UP   | 176.373  | 176.3729 |
| 1890 | M509T10_ | 4.131622 | 2.046708 | 1.941457 | 0.114333 | 0.386993 | UP   | 509.4067 | 509.4051 |
| 1891 | M712T43_ | 1.36688  | 0.450886 | 1.784574 | 0.114408 | 0.387034 | UP   | 712.0071 | 712.0062 |
| 1892 | M1009T44 | 1.58935  | 0.668437 | 1.770823 | 0.114542 | 0.387107 | UP   | 1008.742 | 1008.74  |
| 1893 | M644T31  | 3.836011 | 1.939607 | 1.783689 | 0.114573 | 0.387123 | UP   | 643.953  | 643.9523 |
| 1894 | M423T22_ | 2.867448 | 1.519767 | 1.788556 | 0.114679 | 0.387181 | UP   | 422.7762 | 422.776  |
| 1895 | M223T37  | 1.733499 | -0.79369 | -1.87108 | 0.114796 | 0.387244 | DOWN | 223.0636 | 223.0634 |
| 1896 | M461T22_ | 12.57937 | -3.65299 | -2.0008  | 0.114857 | 0.387277 | DOWN | 461.0238 | 461.0236 |
| 1897 | M428T44  | 1.400223 | -0.48566 | -1.81938 | 0.11488  | 0.387289 | DOWN | 428.1744 | 428.1743 |
| 1898 | M465T39  | 1.330584 | 0.41206  | 1.769831 | 0.114923 | 0.387313 | UP   | 465.3615 | 465.3607 |
| 1899 | M692T39  | 7.355301 | 2.878784 | 2.002364 | 0.115276 | 0.387503 | UP   | 692.4949 | 692.4944 |
| 1900 | M362T29_ | 3.16838  | 1.663745 | 1.768505 | 0.115294 | 0.387513 | UP   | 361.5958 | 361.5955 |
| 1901 | M355T35  | 7.849556 | 2.972611 | 2.002272 | 0.115336 | 0.387535 | UP   | 354.8016 | 354.8014 |
| 1902 | M397T39  | 4.429161 | -2.14703 | -1.9945  | 0.115343 | 0.387539 | DOWN | 397.2921 | 397.2918 |
| 1903 | M488T45  | 1.279643 | -0.35574 | -1.91129 | 0.115424 | 0.387582 | DOWN | 488.2693 | 488.269  |
| 1904 | M867T22  | 3.934676 | 1.976245 | 1.842907 | 0.115444 | 0.387593 | UP   | 866.8957 | 866.8951 |
| 1905 | M187T2_2 | 2407.752 | 11.23347 | 2.004905 | 0.115468 | 0.387606 | UP   | 186.9809 | 186.9808 |
| 1906 | M686T10  | 2.569632 | 1.361562 | 1.825805 | 0.115503 | 0.387625 | UP   | 685.6968 | 685.6943 |
| 1907 | M459T39  | 5.709182 | 2.513284 | 1.990004 | 0.11552  | 0.387634 | UP   | 459.139  | 459.139  |
| 1908 | M364T37_ | 2.205798 | 1.1413   | 1.813341 | 0.115702 | 0.387731 | UP   | 364.3057 | 364.3055 |
| 1909 | M486T11  | 2.975254 | 1.573013 | 1.842831 | 0.116009 | 0.387894 | UP   | 486.3738 | 486.3729 |
| 1910 | M531T29  | 3.699287 | 1.887247 | 1.769184 | 0.116053 | 0.387918 | UP   | 531.4918 | 531.4913 |
| 1911 | M399T31  | 3.135419 | 1.648658 | 1.793665 | 0.116135 | 0.387961 | UP   | 398.5607 | 398.5605 |
| 1912 | M562T26  | 5.148931 | -2.36427 | -1.96223 | 0.116206 | 0.387999 | DOWN | 562.1904 | 562.1898 |
| 1913 | M348T16_ | 4.25061  | 2.08767  | 1.946048 | 0.116231 | 0.388012 | UP   | 348.2171 | 348.2072 |
| 1914 | M443T11_ | 3.632834 | 1.861096 | 1.903486 | 0.116263 | 0.388029 | UP   | 443.2285 | 443.2275 |
| 1915 | M297T23_ | 2.588388 | 1.372054 | 1.88629  | 0.116286 | 0.388041 | UP   | 297.115  | 297.1147 |
| 1916 | M527T23  | 5.377539 | -2.42695 | -1.96208 | 0.116335 | 0.388067 | DOWN | 527.1256 | 527.1247 |
| 1917 | M465T2   | 162.0117 | 7.339954 | 1.997847 | 0.116401 | 0.388102 | UP   | 464.7219 | 464.7219 |
| 1918 | M424T14_ | 9.956037 | 3.315572 | 1.983265 | 0.116667 | 0.388242 | UP   | 424.2341 | 424.2332 |
| 1919 | M661T31  | 4.268098 | 2.093593 | 1.830043 | 0.116789 | 0.388306 | UP   | 661.2325 | 661.232  |
| 1920 | M470T38  | 4.060569 | 2.021682 | 1.790107 | 0.116898 | 0.388363 | UP   | 470.0924 | 470.0922 |
| 1921 | M258T36  | 3.066943 | 1.616801 | 1.963438 | 0.116917 | 0.388374 | UP   | 258.1934 | 258.1933 |
| 1922 | M284T16_ | 5.331908 | 2.414652 | 1.930489 | 0.116931 | 0.388381 | UP   | 284.0665 | 284.0664 |
| 1923 | M681T10_ | 3.314594 | 1.728832 | 1.882325 | 0.116958 | 0.388395 | UP   | 681.0169 | 681.0159 |
| 1924 | M371T37_ | 2.257893 | -1.17498 | -1.93877 | 0.117064 | 0.38845  | DOWN | 371.1013 | 371.1008 |
| 1925 | M462T45  | 1.41557  | 0.501383 | 1.75615  | 0.117157 | 0.388499 | UP   | 461.8507 | 461.8506 |
| 1926 | M391T31  | 2.619133 | -1.38909 | -1.86921 | 0.117171 | 0.388507 | DOWN | 391.0736 | 391.0731 |

|      |          |          |          |          |          |          |      |          |          |
|------|----------|----------|----------|----------|----------|----------|------|----------|----------|
| 1927 | M527T16  | 48.33789 | 5.595083 | 1.990808 | 0.11726  | 0.388553 | UP   | 527.1031 | 527.103  |
| 1928 | M514T10_ | 18.69459 | 4.224549 | 1.986676 | 0.117301 | 0.388575 | UP   | 514.2916 | 514.2911 |
| 1929 | M710T44  | 1.83714  | 0.877462 | 1.957846 | 0.117322 | 0.388585 | UP   | 710.3594 | 710.3592 |
| 1930 | M327T31_ | 3.209563 | 1.682377 | 1.901788 | 0.117328 | 0.388589 | UP   | 327.2358 | 327.2355 |
| 1931 | M342T12  | 12.68608 | 3.665175 | 1.987779 | 0.117337 | 0.388593 | UP   | 342.2091 | 342.2088 |
| 1932 | M305T39_ | 5.132315 | 2.35961  | 1.973682 | 0.117399 | 0.388626 | UP   | 304.7703 | 304.77   |
| 1933 | M1359T9  | 2.465544 | 1.301906 | 1.821779 | 0.117586 | 0.388723 | UP   | 1359.025 | 1359.02  |
| 1934 | M183T14  | 1.668904 | -0.7389  | -1.79063 | 0.117608 | 0.388734 | DOWN | 183.0616 | 183.0615 |
| 1935 | M401T22_ | 1.93625  | -0.95327 | -1.86097 | 0.117639 | 0.38875  | DOWN | 401.2538 | 401.2537 |
| 1936 | M705T31  | 2.190246 | -1.13109 | -1.78919 | 0.117665 | 0.388764 | DOWN | 705.187  | 705.1859 |
| 1937 | M658T34_ | 1.679893 | 0.748369 | 1.781707 | 0.117761 | 0.388813 | UP   | 658.4895 | 658.4882 |
| 1938 | M432T23_ | 1.87819  | 0.909343 | 1.778349 | 0.117839 | 0.388854 | UP   | 432.2534 | 432.2513 |
| 1939 | M866T11  | 5.400617 | 2.433124 | 1.939952 | 0.117846 | 0.388858 | UP   | 866.3574 | 866.3562 |
| 1940 | M435T26_ | 1.798981 | 0.84718  | 1.756165 | 0.117863 | 0.388866 | UP   | 435.1403 | 435.14   |
| 1941 | M1054T44 | 1.692051 | 0.758773 | 1.769871 | 0.117894 | 0.388882 | UP   | 1053.771 | 1053.769 |
| 1942 | M346T11_ | 22.04081 | 4.462105 | 1.985014 | 0.117906 | 0.388889 | UP   | 346.0779 | 346.0774 |
| 1943 | M306T31  | 3.808127 | 1.929082 | 1.775373 | 0.117926 | 0.388899 | UP   | 306.1189 | 306.1187 |
| 1944 | M879T45  | 1.433152 | 0.519192 | 1.750907 | 0.11819  | 0.389035 | UP   | 878.6691 | 878.6672 |
| 1945 | M391T28  | 3.7253   | 1.897357 | 1.815927 | 0.118239 | 0.38906  | UP   | 391.178  | 391.1774 |
| 1946 | M325T21  | 2.261601 | -1.17734 | -1.76772 | 0.118267 | 0.389075 | DOWN | 325.1005 | 325.0985 |
| 1947 | M634T31  | 105.4527 | 6.720452 | 1.983573 | 0.118312 | 0.389098 | UP   | 633.8208 | 633.8202 |
| 1948 | M346T21_ | 2.867071 | 1.519578 | 1.890895 | 0.118392 | 0.389139 | UP   | 346.3179 | 346.3172 |
| 1949 | M399T10_ | 2.747073 | 1.457895 | 1.776143 | 0.11844  | 0.389163 | UP   | 398.9417 | 398.9405 |
| 1950 | M447T29_ | 3.692359 | 1.884543 | 1.940609 | 0.118453 | 0.38917  | UP   | 447.1469 | 447.1465 |
| 1951 | M591T25  | 5.232803 | 2.387584 | 1.927775 | 0.118463 | 0.389175 | UP   | 591.201  | 591.2005 |
| 1952 | M499T31_ | 1.765268 | -0.81989 | -1.7532  | 0.11851  | 0.389199 | DOWN | 498.9159 | 498.9148 |
| 1953 | M390T25  | 2.963654 | 1.567377 | 1.752325 | 0.118539 | 0.389214 | UP   | 390.1365 | 390.1361 |
| 1954 | M499T30_ | 3.228306 | 1.690777 | 1.752716 | 0.11856  | 0.389225 | UP   | 499.1755 | 499.1746 |
| 1955 | M681T9_4 | 25.41206 | -4.66744 | -1.98006 | 0.118577 | 0.389234 | DOWN | 681.3557 | 681.3547 |
| 1956 | M683T13  | 2.948646 | 1.560053 | 1.778917 | 0.118652 | 0.389272 | UP   | 682.5276 | 682.5258 |
| 1957 | M301T22_ | 6.457037 | 2.690872 | 1.961722 | 0.118736 | 0.389315 | UP   | 301.056  | 301.0557 |
| 1958 | M455T24_ | 3.025304 | 1.59708  | 1.78525  | 0.118741 | 0.389318 | UP   | 455.1377 | 455.1374 |
| 1959 | M646T30_ | 3.989386 | 1.996167 | 1.784974 | 0.118849 | 0.389373 | UP   | 646.1099 | 646.1091 |
| 1960 | M266T23_ | 3.032667 | 1.600587 | 1.804007 | 0.118896 | 0.389397 | UP   | 266.084  | 266.0839 |
| 1961 | M645T43  | 1.254962 | 0.327644 | 1.745411 | 0.119075 | 0.389488 | UP   | 645.466  | 645.4648 |
| 1962 | M651T11_ | 2.549427 | 1.350173 | 1.748834 | 0.11935  | 0.389627 | UP   | 651.4699 | 651.4688 |
| 1963 | M753T10  | 4.168734 | 2.059609 | 1.877186 | 0.119499 | 0.389703 | UP   | 753.4732 | 753.4731 |
| 1964 | M288T29_ | 2.834933 | 1.503315 | 1.742554 | 0.119588 | 0.389748 | UP   | 287.6335 | 287.6329 |
| 1965 | M334T36  | 2.053617 | 1.038167 | 1.926634 | 0.119618 | 0.389763 | UP   | 334.2461 | 334.2459 |
| 1966 | M430T42  | 1.129481 | 0.17566  | 1.752035 | 0.119696 | 0.389802 | UP   | 430.3034 | 430.3023 |
| 1967 | M164T10  | 2.260938 | -1.17692 | -1.74781 | 0.119716 | 0.389812 | DOWN | 163.6437 | 163.6435 |
| 1968 | M1214T44 | 3.054857 | 1.611105 | 1.782744 | 0.119767 | 0.389838 | UP   | 1213.732 | 1213.731 |
| 1969 | M524T43  | 1.192269 | 0.253709 | 1.741308 | 0.119815 | 0.389862 | UP   | 524.3739 | 524.3729 |
| 1970 | M554T31  | 2.215005 | -1.14731 | -1.74353 | 0.119815 | 0.389862 | DOWN | 554.2556 | 554.2547 |
| 1971 | M375T32_ | 4.05019  | 2.01799  | 1.844369 | 0.119917 | 0.389913 | UP   | 375.1314 | 375.1311 |
| 1972 | M550T34  | 1.987946 | -0.99128 | -1.82925 | 0.120032 | 0.389971 | DOWN | 550.3506 | 550.35   |
| 1973 | M645T30  | 3.590892 | 1.844342 | 1.749024 | 0.120053 | 0.389982 | UP   | 645.1065 | 645.1054 |

|      |          |          |          |          |          |          |      |          |          |
|------|----------|----------|----------|----------|----------|----------|------|----------|----------|
| 1974 | M373T31_ | 16.35428 | 4.031596 | 1.969686 | 0.120173 | 0.390042 | UP   | 373.1704 | 373.1619 |
| 1975 | M717T27  | 2.225909 | 1.154395 | 1.75668  | 0.120201 | 0.390056 | UP   | 716.5164 | 716.516  |
| 1976 | M537T9   | 2.387736 | -1.25564 | -1.7485  | 0.120226 | 0.390068 | DOWN | 537.296  | 537.2946 |
| 1977 | M264T21  | 3.120831 | 1.64193  | 1.818996 | 0.120227 | 0.390069 | UP   | 264.102  | 264.1016 |
| 1978 | M483T15  | 39.01147 | 5.285827 | 1.968679 | 0.120275 | 0.390093 | UP   | 483.0036 | 483.0036 |
| 1979 | M1144T44 | 1.692583 | 0.759226 | 1.739016 | 0.120303 | 0.390107 | UP   | 1143.83  | 1143.829 |
| 1980 | M286T2   | 4280.68  | 12.06362 | 1.968716 | 0.120346 | 0.390129 | UP   | 285.8935 | 285.8932 |
| 1981 | M962T10  | 4.703038 | 2.233593 | 1.877703 | 0.120365 | 0.390138 | UP   | 961.6018 | 961.601  |
| 1982 | M294T33  | 3.445676 | 1.784787 | 1.946278 | 0.120433 | 0.390172 | UP   | 294.2147 | 294.2145 |
| 1983 | M607T38  | 2.441559 | 1.287803 | 1.754443 | 0.120475 | 0.390193 | UP   | 607.4581 | 607.4562 |
| 1984 | M747T19_ | 2.1793   | 1.123865 | 1.739503 | 0.120606 | 0.390258 | UP   | 746.5407 | 746.5387 |
| 1985 | M684T31  | 121.2567 | 6.92192  | 1.965753 | 0.120752 | 0.39033  | UP   | 684.3127 | 684.3125 |
| 1986 | M705T43  | 2.570816 | 1.362226 | 1.769158 | 0.120757 | 0.390333 | UP   | 705.4876 | 705.4875 |
| 1987 | M420T22_ | 3.789603 | -1.92205 | -1.91578 | 0.120777 | 0.390343 | DOWN | 420.209  | 420.2082 |
| 1988 | M640T33_ | 4.534775 | 2.181031 | 1.875925 | 0.12082  | 0.390364 | UP   | 640.0314 | 640.0312 |
| 1989 | M385T27_ | 3.591047 | 1.844404 | 1.91599  | 0.12085  | 0.390379 | UP   | 385.2783 | 385.2781 |
| 1990 | M758T29  | 42.04548 | 5.393879 | 1.963277 | 0.121083 | 0.390494 | UP   | 758.3501 | 758.3496 |
| 1991 | M366T14  | 178.1336 | 7.476816 | 1.963342 | 0.121089 | 0.390497 | UP   | 366.2179 | 366.2177 |
| 1992 | M369T22  | 3.577935 | 1.839127 | 1.839731 | 0.121097 | 0.390501 | UP   | 368.9722 | 368.9721 |
| 1993 | M249T14  | 9.58454  | 3.260709 | 1.956445 | 0.121109 | 0.390507 | UP   | 249.1099 | 249.1096 |
| 1994 | M464T37  | 1.727962 | -0.78907 | -1.80098 | 0.121161 | 0.390533 | DOWN | 464.1295 | 464.1285 |
| 1995 | M365T38  | 3.037827 | 1.60304  | 1.747148 | 0.121353 | 0.390628 | UP   | 365.1888 | 365.1881 |
| 1996 | M458T27  | 3.261299 | 1.705447 | 1.799556 | 0.121383 | 0.390642 | UP   | 457.518  | 457.5175 |
| 1997 | M701T33  | 17.14394 | 4.099627 | 1.959382 | 0.121427 | 0.390664 | UP   | 701.3546 | 701.3544 |
| 1998 | M778T41  | 2.995961 | 1.583019 | 1.851639 | 0.121441 | 0.390671 | UP   | 778.2579 | 778.257  |
| 1999 | M410T11  | 1.995072 | 0.996441 | 1.748613 | 0.121534 | 0.390717 | UP   | 410.3088 | 410.3081 |
| 2000 | M922T44_ | 1.502861 | 0.587711 | 1.743006 | 0.121628 | 0.390763 | UP   | 921.6924 | 921.6907 |
| 2001 | M541T22  | 113.9818 | 6.83266  | 1.959258 | 0.121646 | 0.390772 | UP   | 541.1554 | 541.155  |
| 2002 | M349T27_ | 2.956224 | 1.563756 | 1.770673 | 0.12171  | 0.390803 | UP   | 349.0897 | 349.0893 |
| 2003 | M440T10_ | 3.445774 | 1.784828 | 1.85486  | 0.121851 | 0.390872 | UP   | 440.161  | 440.1593 |
| 2004 | M367T18  | 18.09197 | 4.177277 | 1.955223 | 0.121871 | 0.390882 | UP   | 367.2211 | 367.221  |
| 2005 | M580T44_ | 1.273909 | 0.349262 | 1.814346 | 0.121904 | 0.390898 | UP   | 580.4295 | 580.4285 |
| 2006 | M494T31_ | 1.784378 | -0.83542 | -1.73522 | 0.121994 | 0.390945 | DOWN | 493.783  | 493.7818 |
| 2007 | M403T10_ | 2.342679 | 1.228159 | 1.78445  | 0.12269  | 0.391309 | UP   | 403.1366 | 403.1352 |
| 2008 | M406T20  | 163.6831 | 7.354761 | 1.951595 | 0.122732 | 0.391331 | UP   | 406.2029 | 406.2026 |
| 2009 | M345T31  | 2.628249 | 1.394102 | 1.786481 | 0.122741 | 0.391336 | UP   | 345.1113 | 345.1111 |
| 2010 | M487T15  | 8.504184 | 3.088173 | 1.944499 | 0.122788 | 0.39136  | UP   | 487.1628 | 487.1624 |
| 2011 | M621T11_ | 4.478554 | 2.163033 | 1.863845 | 0.122805 | 0.391369 | UP   | 621.2946 | 621.2941 |
| 2012 | M290T18  | 3.209966 | -1.68256 | -1.86797 | 0.122822 | 0.391378 | DOWN | 290.0921 | 290.0918 |
| 2013 | M366T18  | 314.9756 | 8.299096 | 1.950817 | 0.122842 | 0.391388 | UP   | 366.2179 | 366.2177 |
| 2014 | M591T26_ | 3.545732 | 1.826084 | 1.851776 | 0.122938 | 0.391439 | UP   | 591.2989 | 591.2985 |
| 2015 | M304T33_ | 3.05545  | 1.611385 | 1.887171 | 0.122942 | 0.39144  | UP   | 304.2356 | 304.2354 |
| 2016 | M757T26  | 106.9907 | 6.741341 | 1.949796 | 0.122981 | 0.391461 | UP   | 757.3463 | 757.3463 |
| 2017 | M549T38  | 3.969508 | 1.98896  | 1.758564 | 0.123046 | 0.391494 | UP   | 549.0017 | 549.0016 |
| 2018 | M405T23  | 3.913064 | 1.968299 | 1.87392  | 0.123111 | 0.391528 | UP   | 405.2231 | 405.2226 |
| 2019 | M576T28  | 5.926593 | 2.567203 | 1.945325 | 0.123226 | 0.391588 | UP   | 576.3438 | 576.3379 |
| 2020 | M977T11  | 44.07339 | 5.461836 | 1.946736 | 0.123267 | 0.391608 | UP   | 977.4395 | 977.438  |

|      |          |          |          |          |          |          |      |          |          |
|------|----------|----------|----------|----------|----------|----------|------|----------|----------|
| 2021 | M519T38  | 6.200467 | 2.632377 | 1.849039 | 0.123382 | 0.391668 | UP   | 519.0062 | 519.0056 |
| 2022 | M333T37_ | 99.69689 | 6.639477 | 1.946174 | 0.123498 | 0.391728 | UP   | 333.0257 | 333.024  |
| 2023 | M320T34  | 2.256534 | -1.17411 | -1.92499 | 0.123634 | 0.391798 | DOWN | 320.2012 | 320.2008 |
| 2024 | M545T11_ | 4.082997 | 2.029628 | 1.814853 | 0.123704 | 0.391834 | UP   | 544.9255 | 544.9251 |
| 2025 | M178T17_ | 2.292328 | 1.196814 | 1.729012 | 0.123744 | 0.391854 | UP   | 178.0581 | 178.0577 |
| 2026 | M288T23_ | 2.607157 | 1.382477 | 1.927381 | 0.123756 | 0.391861 | UP   | 288.1596 | 288.1596 |
| 2027 | M778T43_ | 1.549227 | 0.631548 | 1.752943 | 0.123819 | 0.391893 | UP   | 777.545  | 777.5437 |
| 2028 | M685T10_ | 3.736891 | 1.901838 | 1.884441 | 0.123825 | 0.391896 | UP   | 684.6823 | 684.6799 |
| 2029 | M437T22_ | 3.593639 | 1.845445 | 1.797282 | 0.123843 | 0.391905 | UP   | 437.0022 | 437.0014 |
| 2030 | M402T10_ | 2.397929 | 1.261789 | 1.722405 | 0.123888 | 0.391928 | UP   | 402.1932 | 402.1858 |
| 2031 | M691T43_ | 1.44781  | 0.533872 | 1.720281 | 0.123908 | 0.391938 | UP   | 691.4983 | 691.4972 |
| 2032 | M421T26  | 3.159209 | 1.659563 | 1.71989  | 0.124019 | 0.391995 | UP   | 420.5103 | 420.5098 |
| 2033 | M300T29_ | 2.787534 | 1.478989 | 1.718679 | 0.124055 | 0.392014 | UP   | 299.6333 | 299.6327 |
| 2034 | M467T38  | 1.309328 | -0.38883 | -1.78182 | 0.124061 | 0.392017 | DOWN | 467.1021 | 467.1014 |
| 2035 | M725T44  | 2.924209 | 1.548046 | 1.861713 | 0.124158 | 0.392066 | UP   | 725.3615 | 725.3608 |
| 2036 | M418T45  | 1.242968 | 0.313789 | 1.727487 | 0.124212 | 0.392094 | UP   | 418.2428 | 418.2427 |
| 2037 | M646T43_ | 1.237314 | 0.307212 | 1.744333 | 0.124231 | 0.392104 | UP   | 646.4691 | 646.4679 |
| 2038 | M352T22_ | 1.743641 | -0.8021  | -1.75318 | 0.124304 | 0.392141 | DOWN | 352.1842 | 352.1841 |
| 2039 | M787T39  | 2.955054 | 1.563184 | 1.783166 | 0.124393 | 0.39219  | UP   | 786.5951 | 786.5949 |
| 2040 | M315T24_ | 1.839005 | 0.878925 | 1.731739 | 0.124634 | 0.392324 | UP   | 315.1227 | 315.1224 |
| 2041 | M447T22  | 2.722385 | 1.444871 | 1.714879 | 0.124713 | 0.392368 | UP   | 446.9334 | 446.9326 |
| 2042 | M324T9_3 | 3.699498 | 1.887329 | 1.757246 | 0.124727 | 0.392376 | UP   | 324.1598 | 324.1591 |
| 2043 | M300T29_ | 2.888025 | 1.530083 | 1.714043 | 0.124888 | 0.392465 | UP   | 300.135  | 300.1345 |
| 2044 | M500T30_ | 3.336791 | 1.738461 | 1.724798 | 0.124932 | 0.392489 | UP   | 500.179  | 500.1783 |
| 2045 | M1232T43 | 2.112342 | 1.078843 | 1.758817 | 0.125124 | 0.392595 | UP   | 1231.882 | 1231.882 |
| 2046 | M310T35_ | 2.916629 | -1.5443  | -1.82058 | 0.125144 | 0.392606 | DOWN | 310.3296 | 310.3293 |
| 2047 | M1384T9_ | 11.42132 | 3.513658 | 1.903879 | 0.125227 | 0.392652 | UP   | 1383.985 | 1383.983 |
| 2048 | M499T9_4 | 3.118276 | -1.64075 | -1.87383 | 0.125246 | 0.392662 | DOWN | 499.368  | 499.3674 |
| 2049 | M561T9   | 6.850676 | -2.77625 | -1.91666 | 0.125277 | 0.392679 | DOWN | 561.2628 | 561.2611 |
| 2050 | M745T45  | 1.424249 | -0.5102  | -1.71175 | 0.125314 | 0.3927   | DOWN | 744.5838 | 744.5824 |
| 2051 | M379T21  | 2.233082 | -1.15904 | -1.78473 | 0.125465 | 0.392783 | DOWN | 379.1242 | 379.1165 |
| 2052 | M566T28  | 8.164636 | -3.02939 | -1.91918 | 0.125611 | 0.392863 | DOWN | 566.2029 | 566.2028 |
| 2053 | M301T23_ | 5.54836  | 2.472062 | 1.874269 | 0.125676 | 0.392898 | UP   | 300.9924 | 300.9924 |
| 2054 | M540T26_ | 11.76984 | 3.557023 | 1.92083  | 0.125681 | 0.392901 | UP   | 539.9715 | 539.9715 |
| 2055 | M563T9   | 7.510973 | -2.909   | -1.90894 | 0.125838 | 0.392987 | DOWN | 563.2593 | 563.2581 |
| 2056 | M1458T10 | 5.001488 | 2.322357 | 1.902785 | 0.12595  | 0.393048 | UP   | 1457.947 | 1457.943 |
| 2057 | M847T39  | 29.91753 | 4.902919 | 1.927197 | 0.12607  | 0.393114 | UP   | 846.6524 | 846.6512 |
| 2058 | M999T44_ | 2.312446 | 1.20942  | 1.71303  | 0.126123 | 0.393142 | UP   | 999.4992 | 999.4964 |
| 2059 | M554T35  | 18.93502 | 4.242985 | 1.925366 | 0.126284 | 0.39323  | UP   | 554.1054 | 554.1051 |
| 2060 | M716T41  | 2.954722 | 1.563022 | 1.850077 | 0.126317 | 0.393248 | UP   | 716.3236 | 716.3221 |
| 2061 | M725T32  | 3.331178 | 1.736033 | 1.725599 | 0.126581 | 0.393391 | UP   | 725.2097 | 725.2093 |
| 2062 | M279T2   | 590.2587 | 9.205203 | 1.924082 | 0.126675 | 0.393442 | UP   | 278.8969 | 278.8886 |
| 2063 | M828T9_2 | 17.27489 | -4.1106  | -1.92008 | 0.126843 | 0.393532 | DOWN | 828.2573 | 828.2566 |
| 2064 | M754T40  | 2.178914 | -1.12361 | -1.84723 | 0.126931 | 0.39358  | DOWN | 754.4428 | 754.4423 |
| 2065 | M407T20  | 162.8372 | 7.347286 | 1.921284 | 0.12708  | 0.39366  | UP   | 407.2063 | 407.2059 |
| 2066 | M408T41_ | 3.736969 | 1.901869 | 1.814128 | 0.127103 | 0.393672 | UP   | 407.6558 | 407.6554 |
| 2067 | M401T21_ | 2.135227 | -1.09439 | -1.75543 | 0.127111 | 0.393676 | DOWN | 401.1635 | 401.1631 |

|      |          |          |          |          |          |          |      |          |          |
|------|----------|----------|----------|----------|----------|----------|------|----------|----------|
| 2068 | M558T44_ | 1.226083 | 0.294057 | 1.702765 | 0.127246 | 0.393749 | UP   | 557.9147 | 557.914  |
| 2069 | M801T31  | 144.6378 | 7.176301 | 1.91938  | 0.127357 | 0.393809 | UP   | 801.2822 | 801.2821 |
| 2070 | M385T10_ | 2.894944 | 1.533535 | 1.764311 | 0.127399 | 0.393831 | UP   | 385.0471 | 385.0458 |
| 2071 | M350T29_ | 3.096438 | 1.630609 | 1.711372 | 0.127421 | 0.393842 | UP   | 350.0975 | 350.0968 |
| 2072 | M407T30_ | 5.495347 | 2.458211 | 1.910655 | 0.127449 | 0.393858 | UP   | 407.2174 | 407.2173 |
| 2073 | M321T26_ | 7.243653 | -2.85672 | -1.91334 | 0.127531 | 0.393901 | DOWN | 321.1158 | 321.1156 |
| 2074 | M377T7   | 4.99222  | -2.31968 | -1.87537 | 0.127637 | 0.393958 | DOWN | 377.0054 | 377.0049 |
| 2075 | M381T21_ | 2.568384 | -1.36086 | -1.79673 | 0.12781  | 0.39405  | DOWN | 381.1212 | 381.1121 |
| 2076 | M1100T44 | 1.820544 | 0.86437  | 1.712525 | 0.127867 | 0.39408  | UP   | 1099.803 | 1099.802 |
| 2077 | M265T37  | 2.160781 | 1.111553 | 1.898483 | 0.127963 | 0.394131 | UP   | 265.195  | 265.1948 |
| 2078 | M389T10_ | 2.524626 | 1.33607  | 1.795368 | 0.128013 | 0.394158 | UP   | 389.4701 | 389.4692 |
| 2079 | M565T39_ | 50.29839 | 5.65244  | 1.913987 | 0.128149 | 0.39423  | UP   | 565.1406 | 565.1406 |
| 2080 | M422T19_ | 6.82727  | 2.771309 | 1.873433 | 0.12816  | 0.394236 | UP   | 422.0836 | 422.0833 |
| 2081 | M563T32  | 2.910483 | 1.541259 | 1.746765 | 0.128162 | 0.394237 | UP   | 562.9604 | 562.9601 |
| 2082 | M465T34  | 4.571434 | 2.192647 | 1.892963 | 0.128195 | 0.394255 | UP   | 464.8475 | 464.8471 |
| 2083 | M286T19_ | 8.334548 | 3.059104 | 1.902273 | 0.128302 | 0.394311 | UP   | 286.1112 | 286.111  |
| 2084 | M412T15  | 2.290732 | 1.195808 | 1.69585  | 0.128395 | 0.39436  | UP   | 412.1759 | 412.1755 |
| 2085 | M350T21_ | 4.482035 | 2.164154 | 1.847149 | 0.128618 | 0.394478 | UP   | 349.709  | 349.7086 |
| 2086 | M747T43  | 1.37298  | 0.45731  | 1.694574 | 0.128633 | 0.394486 | UP   | 747.0186 | 747.0172 |
| 2087 | M490T30_ | 15.42603 | 3.947295 | 1.901086 | 0.128733 | 0.394539 | UP   | 490.1161 | 490.1159 |
| 2088 | M382T31_ | 3.090285 | 1.62774  | 1.695968 | 0.128775 | 0.394561 | UP   | 382.0877 | 382.0874 |
| 2089 | M459T25  | 161.8533 | 7.338543 | 1.90927  | 0.128854 | 0.394602 | UP   | 459.1932 | 459.193  |
| 2090 | M848T39  | 29.2933  | 4.872499 | 1.907494 | 0.128936 | 0.394645 | UP   | 847.6559 | 847.6551 |
| 2091 | M295T21_ | 1.74701  | 0.804888 | 1.693991 | 0.12896  | 0.394658 | UP   | 295.0846 | 295.084  |
| 2092 | M536T26_ | 240.4982 | 7.909883 | 1.90842  | 0.12898  | 0.394668 | UP   | 536.3488 | 536.3485 |
| 2093 | M615T23  | 3.02678  | 1.597784 | 1.693727 | 0.129004 | 0.394681 | UP   | 615.0617 | 615.061  |
| 2094 | M536T25  | 3.640027 | 1.863949 | 1.708264 | 0.129161 | 0.394763 | UP   | 536.0675 | 536.0668 |
| 2095 | M1724T9  | 7.337865 | 2.87536  | 1.856901 | 0.129197 | 0.394782 | UP   | 1724.235 | 1724.233 |
| 2096 | M355T28_ | 2.393524 | 1.259136 | 1.815694 | 0.129307 | 0.39484  | UP   | 355.2039 | 355.2036 |
| 2097 | M1276T43 | 2.264811 | 1.179391 | 1.727878 | 0.129525 | 0.394953 | UP   | 1275.908 | 1275.905 |
| 2098 | M498T31_ | 1.756855 | -0.813   | -1.69595 | 0.129566 | 0.394974 | DOWN | 498.3456 | 498.3445 |
| 2099 | M470T11_ | 4.338884 | 2.117324 | 1.836235 | 0.129622 | 0.395004 | UP   | 470.2506 | 470.25   |
| 2100 | M524T31_ | 3.505359 | 1.809562 | 1.690634 | 0.129735 | 0.395062 | UP   | 524.0171 | 524.0167 |
| 2101 | M525T23  | 9.079044 | -3.18254 | -1.89309 | 0.129757 | 0.395074 | DOWN | 525.1272 | 525.1264 |
| 2102 | M572T31_ | 45.39459 | 5.504449 | 1.902017 | 0.129868 | 0.395131 | UP   | 572.0933 | 572.0933 |
| 2103 | M510T33_ | 2.252614 | -1.1716  | -1.81044 | 0.129961 | 0.39518  | DOWN | 510.3555 | 510.3546 |
| 2104 | M199T25  | 2.587478 | -1.37155 | -1.87564 | 0.130039 | 0.39522  | DOWN | 199.1693 | 199.169  |
| 2105 | M465T30  | 1.747832 | 0.805567 | 1.686482 | 0.130195 | 0.3953   | UP   | 464.8134 | 464.8127 |
| 2106 | M491T26_ | 3.028887 | 1.598788 | 1.709615 | 0.130215 | 0.395311 | UP   | 490.9389 | 490.9387 |
| 2107 | M416T29  | 85.11138 | 6.41128  | 1.898655 | 0.130434 | 0.395424 | UP   | 416.1872 | 416.1867 |
| 2108 | M857T11_ | 3.425072 | 1.776134 | 1.745948 | 0.130464 | 0.395439 | UP   | 856.5321 | 856.5308 |
| 2109 | M707T31  | 2.279082 | -1.18845 | -1.71872 | 0.13053  | 0.395473 | DOWN | 707.1825 | 707.1823 |
| 2110 | M654T30  | 4.728568 | -2.2414  | -1.85729 | 0.130609 | 0.395513 | DOWN | 654.3081 | 654.3076 |
| 2111 | M535T44  | 1.221596 | 0.288768 | 1.684967 | 0.130619 | 0.395519 | UP   | 535.4001 | 535.3991 |
| 2112 | M484T11  | 33.19665 | 5.052966 | 1.895711 | 0.130709 | 0.395565 | UP   | 484.072  | 484.0717 |
| 2113 | M423T10_ | 21.86464 | -4.45053 | -1.88973 | 0.130796 | 0.39561  | DOWN | 423.1588 | 423.1584 |
| 2114 | M471T38  | 3.482949 | 1.800309 | 1.706589 | 0.13081  | 0.395616 | UP   | 471.0958 | 471.0958 |

|      |          |          |          |          |          |          |      |          |          |
|------|----------|----------|----------|----------|----------|----------|------|----------|----------|
| 2115 | M307T17_ | 3.157023 | 1.658565 | 1.869859 | 0.130819 | 0.395621 | UP   | 307.1519 | 307.1519 |
| 2116 | M297T37  | 1.722743 | -0.78471 | -1.76275 | 0.130855 | 0.39564  | DOWN | 297.0825 | 297.0821 |
| 2117 | M562T9   | 8.893187 | -3.1527  | -1.88865 | 0.131065 | 0.395747 | DOWN | 562.2652 | 562.2648 |
| 2118 | M554T42_ | 1.245114 | 0.316278 | 1.705217 | 0.131178 | 0.395805 | UP   | 554.0593 | 554.0582 |
| 2119 | M431T20  | 90.74569 | 6.503757 | 1.893394 | 0.131202 | 0.395817 | UP   | 431.1981 | 431.1888 |
| 2120 | M789T10  | 2.588374 | -1.37205 | -1.70537 | 0.131226 | 0.395829 | DOWN | 789.4281 | 789.4272 |
| 2121 | M200T2   | 344.9758 | 8.430351 | 1.892993 | 0.131296 | 0.395865 | UP   | 200.4222 | 200.422  |
| 2122 | M471T29_ | 3.671455 | 1.876352 | 1.693635 | 0.131436 | 0.395936 | UP   | 470.5258 | 470.5253 |
| 2123 | M487T23_ | 6.80107  | -2.76576 | -1.86745 | 0.131473 | 0.395955 | DOWN | 487.0198 | 487.0198 |
| 2124 | M349T21_ | 18.28513 | 4.192599 | 1.891376 | 0.131514 | 0.395975 | UP   | 349.2107 | 349.2105 |
| 2125 | M782T30  | 3.580473 | -1.84015 | -1.78859 | 0.131613 | 0.396026 | DOWN | 782.1955 | 782.1946 |
| 2126 | M299T29  | 2.865422 | 1.518748 | 1.680328 | 0.13171  | 0.396075 | UP   | 298.6357 | 298.6356 |
| 2127 | M345T20_ | 2.522321 | 1.334752 | 1.747733 | 0.131715 | 0.396078 | UP   | 345.1768 | 345.1766 |
| 2128 | M328T32_ | 6.005465 | 2.586276 | 1.839928 | 0.131745 | 0.396093 | UP   | 327.6483 | 327.6482 |
| 2129 | M256T23  | 2.784203 | 1.477264 | 1.678714 | 0.131955 | 0.396199 | UP   | 255.5824 | 255.5823 |
| 2130 | M1725T9_ | 8.753534 | 3.129866 | 1.857422 | 0.131976 | 0.39621  | UP   | 1724.736 | 1724.73  |
| 2131 | M386T29_ | 3.00336  | 1.586577 | 1.699432 | 0.132063 | 0.396253 | UP   | 386.0624 | 386.0618 |
| 2132 | M322T23_ | 3.648891 | 1.867458 | 1.737641 | 0.132085 | 0.396264 | UP   | 322.2855 | 322.2853 |
| 2133 | M334T11  | 2.229149 | 1.156493 | 1.689357 | 0.132184 | 0.396314 | UP   | 334.1289 | 334.1283 |
| 2134 | M536T44_ | 1.231598 | 0.300531 | 1.681268 | 0.132243 | 0.396344 | UP   | 535.9017 | 535.9008 |
| 2135 | M639T26  | 58.69833 | 5.875248 | 1.886652 | 0.132254 | 0.39635  | UP   | 639.2991 | 639.2986 |
| 2136 | M267T27_ | 12.51261 | -3.64531 | -1.8848  | 0.132421 | 0.396433 | DOWN | 267.1957 | 267.1955 |
| 2137 | M437T2   | 477.9257 | 8.900642 | 1.88463  | 0.13257  | 0.396508 | UP   | 436.7271 | 436.7271 |
| 2138 | M483T23_ | 6.736793 | -2.75206 | -1.88344 | 0.132577 | 0.396512 | DOWN | 483.0242 | 483.0237 |
| 2139 | M555T31_ | 3.694099 | -1.88522 | -1.74225 | 0.1326   | 0.396523 | DOWN | 554.7573 | 554.7563 |
| 2140 | M472T22_ | 2.769395 | 1.469571 | 1.67442  | 0.132634 | 0.39654  | UP   | 471.9445 | 471.9442 |
| 2141 | M537T26_ | 7766.512 | 12.92305 | 1.883578 | 0.132731 | 0.396589 | UP   | 537.3518 | 537.3513 |
| 2142 | M624T43_ | 1.21211  | 0.277521 | 1.705698 | 0.132733 | 0.39659  | UP   | 624.456  | 624.455  |
| 2143 | M397T29_ | 3.31494  | 1.728983 | 1.676163 | 0.132844 | 0.396645 | UP   | 396.5634 | 396.5632 |
| 2144 | M683T20  | 60.45542 | 5.9178   | 1.881998 | 0.132956 | 0.396701 | UP   | 683.3744 | 683.3739 |
| 2145 | M297T30  | 3.296984 | 1.721147 | 1.679046 | 0.13296  | 0.396703 | UP   | 297.0188 | 297.0186 |
| 2146 | M230T22_ | 4.235518 | 2.082538 | 1.82266  | 0.133134 | 0.39679  | UP   | 230.0239 | 230.0239 |
| 2147 | M878T45  | 1.39591  | 0.481205 | 1.672921 | 0.133144 | 0.396795 | UP   | 877.6661 | 877.6643 |
| 2148 | M565T9_1 | 8.44179  | -3.07755 | -1.86127 | 0.133255 | 0.39685  | DOWN | 565.2571 | 565.2568 |
| 2149 | M386T29_ | 3.088743 | 1.62702  | 1.679817 | 0.13334  | 0.396892 | UP   | 385.5607 | 385.5604 |
| 2150 | M357T13  | 2.420821 | 1.275496 | 1.805673 | 0.133464 | 0.396954 | UP   | 357.2752 | 357.2746 |
| 2151 | M1725T9_ | 8.680759 | 3.117821 | 1.845553 | 0.133478 | 0.39696  | UP   | 1725.238 | 1725.236 |
| 2152 | M324T12  | 3.570189 | 1.836    | 1.773287 | 0.133491 | 0.396967 | UP   | 324.2902 | 324.2895 |
| 2153 | M321T33_ | 9.212451 | 3.203585 | 1.872259 | 0.133551 | 0.396997 | UP   | 321.2071 | 321.2068 |
| 2154 | M443T23_ | 8.071913 | -3.01291 | -1.87174 | 0.133597 | 0.39702  | DOWN | 442.9912 | 442.9908 |
| 2155 | M311T29  | 2.825078 | 1.498291 | 1.669518 | 0.133632 | 0.397037 | UP   | 310.6359 | 310.6356 |
| 2156 | M720T11  | 2.779034 | 1.474583 | 1.735945 | 0.133765 | 0.397103 | UP   | 719.791  | 719.7895 |
| 2157 | M294T28_ | 19.09461 | -4.25509 | -1.86848 | 0.133848 | 0.397144 | DOWN | 294.221  | 294.2179 |
| 2158 | M813T23  | 73.69323 | 6.20346  | 1.876095 | 0.133851 | 0.397145 | UP   | 813.2221 | 813.2204 |
| 2159 | M354T26  | 2.446606 | 1.290782 | 1.669538 | 0.133884 | 0.397161 | UP   | 354.1367 | 354.1364 |
| 2160 | M317T28_ | 1.602043 | 0.679913 | 1.701037 | 0.133921 | 0.397179 | UP   | 317.0667 | 317.0666 |
| 2161 | M465T18  | 2.599043 | 1.377981 | 1.692685 | 0.134108 | 0.397272 | UP   | 464.9082 | 464.9078 |

|      |          |          |          |          |          |          |      |          |          |
|------|----------|----------|----------|----------|----------|----------|------|----------|----------|
| 2162 | M496T38  | 1.656638 | -0.72826 | -1.68532 | 0.134109 | 0.397272 | DOWN | 496.4203 | 496.42   |
| 2163 | M464T2   | 3235.498 | 11.65977 | 1.874242 | 0.134171 | 0.397302 | UP   | 463.8064 | 463.8063 |
| 2164 | M513T11_ | 67.46416 | 6.076049 | 1.873729 | 0.134236 | 0.397334 | UP   | 513.2792 | 513.2707 |
| 2165 | M276T31_ | 2.747904 | 1.458332 | 1.69761  | 0.134384 | 0.397406 | UP   | 275.6333 | 275.6329 |
| 2166 | M628T10  | 3.175556 | 1.667009 | 1.703964 | 0.134543 | 0.397485 | UP   | 628.3537 | 628.3531 |
| 2167 | M473T33  | 2.136959 | -1.09556 | -1.67304 | 0.134575 | 0.3975   | DOWN | 473.1631 | 473.1628 |
| 2168 | M382T33  | 3.378517 | 1.75639  | 1.85179  | 0.134642 | 0.397533 | UP   | 382.2226 | 382.2226 |
| 2169 | M564T28_ | 7.530883 | -2.91282 | -1.85657 | 0.134674 | 0.397548 | DOWN | 564.2063 | 564.2054 |
| 2170 | M374T29_ | 2.453288 | 1.294717 | 1.69854  | 0.134677 | 0.39755  | UP   | 374.2709 | 374.2706 |
| 2171 | M783T28  | 375.6933 | 8.553412 | 1.870716 | 0.134719 | 0.39757  | UP   | 783.3318 | 783.3312 |
| 2172 | M220T3   | 8.914879 | 3.156215 | 1.869619 | 0.134839 | 0.397629 | UP   | 220.0392 | 220.0391 |
| 2173 | M645T31_ | 2.810495 | 1.490824 | 1.770458 | 0.134873 | 0.397646 | UP   | 644.9509 | 644.9503 |
| 2174 | M249T18  | 2.688931 | -1.42703 | -1.85339 | 0.134884 | 0.397651 | DOWN | 249.0656 | 249.0652 |
| 2175 | M647T38  | 8.565507 | 3.098539 | 1.826416 | 0.13529  | 0.397848 | UP   | 646.9264 | 646.926  |
| 2176 | M388T42_ | 55.39869 | 5.79178  | 1.866166 | 0.135403 | 0.397903 | UP   | 388.1401 | 388.1399 |
| 2177 | M467T23  | 6.500713 | 2.700598 | 1.832236 | 0.135431 | 0.397916 | UP   | 467.1152 | 467.1149 |
| 2178 | M317T26_ | 4.893989 | -2.29101 | -1.86391 | 0.135561 | 0.397979 | DOWN | 317.1203 | 317.1199 |
| 2179 | M288T29_ | 2.77161  | 1.470724 | 1.659781 | 0.135562 | 0.397979 | UP   | 288.1351 | 288.1347 |
| 2180 | M409T29_ | 3.104681 | 1.634445 | 1.669582 | 0.135645 | 0.39802  | UP   | 408.5634 | 408.5631 |
| 2181 | M391T14  | 2.497    | 1.320196 | 1.679875 | 0.135685 | 0.398039 | UP   | 391.2958 | 391.2947 |
| 2182 | M371T26_ | 3.148709 | 1.654761 | 1.658887 | 0.135746 | 0.398068 | UP   | 370.5479 | 370.5477 |
| 2183 | M345T12  | 34.89964 | 5.12514  | 1.862777 | 0.135793 | 0.398091 | UP   | 345.0455 | 345.0455 |
| 2184 | M351T29_ | 2.397243 | 1.261376 | 1.658853 | 0.13593  | 0.398157 | UP   | 351.0977 | 351.0972 |
| 2185 | M305T29  | 4.362256 | -2.12507 | -1.8163  | 0.136034 | 0.398207 | DOWN | 304.6287 | 304.6283 |
| 2186 | M359T14  | 37.81049 | 5.240715 | 1.860782 | 0.136037 | 0.398208 | UP   | 359.0613 | 359.0612 |
| 2187 | M489T30_ | 1.200784 | 0.263976 | 1.662614 | 0.136208 | 0.39829  | UP   | 489.3616 | 489.3608 |
| 2188 | M250T39  | 1.322082 | -0.40281 | -1.79251 | 0.136291 | 0.398329 | DOWN | 250.0862 | 250.0859 |
| 2189 | M268T27_ | 13.40604 | -3.74481 | -1.85867 | 0.136375 | 0.39837  | DOWN | 268.199  | 268.1988 |
| 2190 | M223T17  | 2.180897 | 1.124921 | 1.664278 | 0.136471 | 0.398416 | UP   | 223.0967 | 223.0962 |
| 2191 | M696T31_ | 2.761578 | 1.465493 | 1.846324 | 0.136485 | 0.398422 | UP   | 696.3665 | 696.3661 |
| 2192 | M595T10_ | 2.501393 | 1.322732 | 1.695401 | 0.136527 | 0.398442 | UP   | 595.4066 | 595.4055 |
| 2193 | M177T17  | 2.078418 | 1.055486 | 1.656288 | 0.136565 | 0.398461 | UP   | 177.0548 | 177.0543 |
| 2194 | M581T44  | 1.246107 | 0.317427 | 1.658944 | 0.136569 | 0.398463 | UP   | 580.931  | 580.93   |
| 2195 | M434T26_ | 2.525251 | 1.336427 | 1.728889 | 0.13661  | 0.398482 | UP   | 434.3842 | 434.3837 |
| 2196 | M579T44  | 1.27399  | 0.349354 | 1.655744 | 0.136664 | 0.398508 | UP   | 579.4264 | 579.4254 |
| 2197 | M572T44  | 1.219628 | 0.286441 | 1.65763  | 0.136675 | 0.398513 | UP   | 571.9164 | 571.9155 |
| 2198 | M622T9_1 | 249.8537 | -7.96494 | -1.85753 | 0.13679  | 0.398568 | DOWN | 621.5694 | 621.5694 |
| 2199 | M392T14  | 2.595335 | 1.375921 | 1.684777 | 0.13682  | 0.398582 | UP   | 392.299  | 392.298  |
| 2200 | M655T28  | 37.19233 | 5.216933 | 1.856742 | 0.136882 | 0.398612 | UP   | 655.2782 | 655.2781 |
| 2201 | M579T39  | 39.63284 | 5.308624 | 1.856427 | 0.136913 | 0.398626 | UP   | 579.1175 | 579.1172 |
| 2202 | M469T26_ | 3.14353  | 1.652386 | 1.653212 | 0.136918 | 0.398629 | UP   | 469.0611 | 469.0609 |
| 2203 | M598T31_ | 3.060867 | 1.613941 | 1.707026 | 0.136971 | 0.398654 | UP   | 598.453  | 598.4521 |
| 2204 | M867T11  | 4.240492 | 2.084232 | 1.79961  | 0.13706  | 0.398696 | UP   | 867.3609 | 867.3595 |
| 2205 | M968T44  | 1.640109 | 0.713791 | 1.665604 | 0.137088 | 0.398709 | UP   | 967.7247 | 967.7237 |
| 2206 | M435T18_ | 2.865638 | 1.518856 | 1.680234 | 0.137143 | 0.398735 | UP   | 434.913  | 434.9124 |
| 2207 | M491T27_ | 6.98639  | 2.804547 | 1.85411  | 0.137205 | 0.398765 | UP   | 491.2991 | 491.2978 |
| 2208 | M383T33_ | 4.307212 | 2.106754 | 1.835392 | 0.137452 | 0.398881 | UP   | 383.1562 | 383.1561 |

|      |          |          |          |          |          |          |      |          |          |
|------|----------|----------|----------|----------|----------|----------|------|----------|----------|
| 2209 | M460T25  | 301.1392 | 8.234287 | 1.852985 | 0.137513 | 0.39891  | UP   | 460.1964 | 460.1963 |
| 2210 | M748T31  | 2.515399 | 1.330788 | 1.660819 | 0.13757  | 0.398937 | UP   | 748.2056 | 748.2053 |
| 2211 | M610T25  | 272.4385 | 8.089787 | 1.852557 | 0.137581 | 0.398942 | UP   | 610.386  | 610.3857 |
| 2212 | M184T31  | 2.073898 | -1.05235 | -1.7309  | 0.137667 | 0.398983 | DOWN | 184.0732 | 184.0729 |
| 2213 | M321T18  | 1.683914 | 0.751819 | 1.654267 | 0.13779  | 0.39904  | UP   | 321.2277 | 321.2271 |
| 2214 | M437T20  | 26.34757 | -4.7196  | -1.85049 | 0.137802 | 0.399046 | DOWN | 437.273  | 437.2727 |
| 2215 | M363T21  | 3.830116 | 1.937388 | 1.83839  | 0.137903 | 0.399093 | UP   | 363.1876 | 363.1874 |
| 2216 | M424T45  | 1.404349 | -0.4899  | -1.6629  | 0.138361 | 0.399307 | DOWN | 424.3091 | 424.3084 |
| 2217 | M157T22  | 2.246339 | 1.167575 | 1.648678 | 0.138379 | 0.399316 | UP   | 156.9946 | 156.9946 |
| 2218 | M255T4   | 19.94132 | 4.317689 | 1.844869 | 0.138404 | 0.399327 | UP   | 254.9649 | 254.9649 |
| 2219 | M472T30_ | 1.973104 | -0.98047 | -1.65005 | 0.13842  | 0.399335 | DOWN | 472.3398 | 472.3395 |
| 2220 | M561T29_ | 2.569555 | 1.361518 | 1.724476 | 0.138421 | 0.399336 | UP   | 560.9027 | 560.9018 |
| 2221 | M689T39  | 5.008613 | 2.324411 | 1.84384  | 0.138497 | 0.399371 | UP   | 688.5425 | 688.5424 |
| 2222 | M745T31  | 3.159142 | 1.659533 | 1.646888 | 0.138587 | 0.399413 | UP   | 744.8758 | 744.8756 |
| 2223 | M255T17_ | 1.704044 | -0.76896 | -1.65226 | 0.138678 | 0.399455 | DOWN | 255.1566 | 255.1562 |
| 2224 | M589T44  | 1.966919 | 0.975937 | 1.650418 | 0.138678 | 0.399455 | UP   | 589.3892 | 589.3884 |
| 2225 | M334T25  | 3.194327 | 1.675512 | 1.651972 | 0.138876 | 0.399547 | UP   | 334.0741 | 334.0739 |
| 2226 | M422T38_ | 1.759289 | 0.814993 | 1.644633 | 0.138896 | 0.399556 | UP   | 422.3993 | 422.3985 |
| 2227 | M417T28  | 12.02421 | 3.58787  | 1.841228 | 0.139016 | 0.399612 | UP   | 417.2733 | 417.2732 |
| 2228 | M746T19_ | 2.266324 | 1.180354 | 1.652536 | 0.139019 | 0.399613 | UP   | 745.5374 | 745.5357 |
| 2229 | M436T33  | 1.635702 | 0.70991  | 1.643235 | 0.139044 | 0.399625 | UP   | 436.3087 | 436.3081 |
| 2230 | M418T26_ | 3.086449 | 1.625948 | 1.663362 | 0.13939  | 0.399784 | UP   | 418.1313 | 418.1309 |
| 2231 | M759T29_ | 25.43516 | 4.668752 | 1.840109 | 0.139547 | 0.399856 | UP   | 759.3549 | 759.3534 |
| 2232 | M828T9_1 | 15.98574 | -3.99871 | -1.83759 | 0.139562 | 0.399864 | DOWN | 827.9235 | 827.9229 |
| 2233 | M430T44  | 1.860451 | 0.895653 | 1.797538 | 0.139581 | 0.399872 | UP   | 430.2074 | 430.2071 |
| 2234 | M312T29_ | 2.667751 | 1.415624 | 1.640876 | 0.139626 | 0.399893 | UP   | 311.6334 | 311.6326 |
| 2235 | M235T23  | 2.675049 | 1.419566 | 1.641038 | 0.139658 | 0.399908 | UP   | 235.0691 | 235.069  |
| 2236 | M534T24_ | 2878.59  | 11.49115 | 1.839328 | 0.139707 | 0.39993  | UP   | 534.2402 | 534.2398 |
| 2237 | M318T30_ | 8.1145   | -3.0205  | -1.82163 | 0.139802 | 0.399974 | DOWN | 318.1381 | 318.1377 |
| 2238 | M394T26_ | 1.599323 | -0.67746 | -1.6392  | 0.139826 | 0.399985 | DOWN | 394.162  | 394.1616 |
| 2239 | M889T37  | 4.829141 | 2.271767 | 1.782177 | 0.139899 | 0.400018 | UP   | 888.6632 | 888.6621 |
| 2240 | M504T11_ | 2.805813 | 1.488419 | 1.776359 | 0.140015 | 0.400071 | UP   | 504.1298 | 504.1244 |
| 2241 | M828T10  | 8.103416 | 3.01853  | 1.799953 | 0.140051 | 0.400088 | UP   | 828.4155 | 828.4145 |
| 2242 | M800T43  | 1.509182 | 0.593767 | 1.655832 | 0.140246 | 0.400177 | UP   | 800.0601 | 800.0587 |
| 2243 | M376T17_ | 10.93637 | 3.451062 | 1.830392 | 0.140447 | 0.400268 | UP   | 376.0842 | 376.084  |
| 2244 | M451T9_4 | 3.422367 | -1.77499 | -1.78972 | 0.140529 | 0.400305 | DOWN | 451.328  | 451.3275 |
| 2245 | M385T31_ | 2.956207 | 1.563747 | 1.669914 | 0.140531 | 0.400307 | UP   | 384.5632 | 384.5631 |
| 2246 | M288T18_ | 2.760554 | 1.464958 | 1.635571 | 0.140577 | 0.400328 | UP   | 287.889  | 287.8885 |
| 2247 | M307T31_ | 3.519683 | 1.815445 | 1.660694 | 0.140728 | 0.400396 | UP   | 306.6205 | 306.6202 |
| 2248 | M480T23  | 2.002687 | 1.001937 | 1.703559 | 0.140924 | 0.400484 | UP   | 480.3022 | 480.3022 |
| 2249 | M784T28  | 255.0803 | 7.994808 | 1.830494 | 0.141145 | 0.400584 | UP   | 784.3353 | 784.3345 |
| 2250 | M515T9   | 4.11492  | -2.04086 | -1.79576 | 0.141227 | 0.400621 | DOWN | 515.256  | 515.2555 |
| 2251 | M652T29_ | 3.64124  | -1.86443 | -1.76867 | 0.141257 | 0.400635 | DOWN | 652.2928 | 652.2916 |
| 2252 | M675T10_ | 3.134403 | 1.648191 | 1.742248 | 0.141303 | 0.400656 | UP   | 675.4196 | 675.4174 |
| 2253 | M385T9_3 | 2.07788  | -1.05511 | -1.67258 | 0.14131  | 0.400659 | DOWN | 384.9161 | 384.916  |
| 2254 | M675T33_ | 9.926927 | 3.311347 | 1.823882 | 0.141979 | 0.400959 | UP   | 675.3449 | 675.3444 |
| 2255 | M727T21  | 27.214   | 4.766277 | 1.824982 | 0.141983 | 0.40096  | UP   | 727.389  | 727.3884 |



|      |          |          |          |          |          |          |      |          |          |
|------|----------|----------|----------|----------|----------|----------|------|----------|----------|
| 2256 | M526T31  | 3.243275 | 1.697451 | 1.628656 | 0.142035 | 0.400984 | UP   | 526.0176 | 526.0173 |
| 2257 | M435T9_2 | 11.47798 | -3.5208  | -1.81502 | 0.14204  | 0.400986 | DOWN | 435.147  | 435.1468 |
| 2258 | M576T22  | 6.109083 | 2.610956 | 1.791087 | 0.142055 | 0.400993 | UP   | 576.099  | 576.0988 |
| 2259 | M834T45  | 1.276555 | 0.352256 | 1.629469 | 0.142079 | 0.401003 | UP   | 833.6398 | 833.6382 |
| 2260 | M422T31  | 2.726394 | 1.446994 | 1.633527 | 0.14213  | 0.401026 | UP   | 422.111  | 422.1107 |
| 2261 | M946T31  | 3.835267 | 1.939327 | 1.651416 | 0.142133 | 0.401028 | UP   | 946.0409 | 946.0391 |
| 2262 | M196T12  | 2.4203   | 1.275186 | 1.630594 | 0.142258 | 0.401083 | UP   | 196.1122 | 196.1122 |
| 2263 | M791T37_ | 3.069329 | 1.617923 | 1.765319 | 0.142321 | 0.401111 | UP   | 790.5896 | 790.589  |
| 2264 | M236T23_ | 2.784372 | 1.477352 | 1.62744  | 0.142332 | 0.401116 | UP   | 235.5709 | 235.5708 |
| 2265 | M501T31  | 2.204754 | -1.14062 | -1.656   | 0.142362 | 0.401129 | DOWN | 500.5775 | 500.5764 |
| 2266 | M453T41_ | 28.8903  | 4.852513 | 1.822076 | 0.142419 | 0.401155 | UP   | 452.8504 | 452.8502 |
| 2267 | M1385T9_ | 7.583192 | 2.922805 | 1.786466 | 0.142436 | 0.401162 | UP   | 1385.482 | 1385.477 |
| 2268 | M1386T9  | 8.048931 | 3.008797 | 1.789741 | 0.142478 | 0.401181 | UP   | 1386.485 | 1386.48  |
| 2269 | M727T31  | 107.1589 | 6.743608 | 1.822096 | 0.142509 | 0.401195 | UP   | 726.9092 | 726.9091 |
| 2270 | M290T34  | 2.544306 | -1.34727 | -1.70248 | 0.142517 | 0.401198 | DOWN | 290.215  | 290.2146 |
| 2271 | M741T31  | 3.491631 | 1.803901 | 1.63255  | 0.142691 | 0.401275 | UP   | 740.8799 | 740.8795 |
| 2272 | M247T3   | 77.67027 | 6.279291 | 1.820895 | 0.142727 | 0.401291 | UP   | 246.8623 | 246.8622 |
| 2273 | M700T31_ | 2.745845 | 1.45725  | 1.633794 | 0.142765 | 0.401308 | UP   | 700.1854 | 700.1853 |
| 2274 | M568T28_ | 10.21384 | -3.35245 | -1.80728 | 0.142794 | 0.401321 | DOWN | 568.2014 | 568.2014 |
| 2275 | M839T18  | 3.210547 | 1.682819 | 1.650001 | 0.142859 | 0.40135  | UP   | 838.8634 | 838.8623 |
| 2276 | M368T14  | 5.74781  | 2.523012 | 1.803769 | 0.142918 | 0.401376 | UP   | 368.1973 | 368.197  |
| 2277 | M630T32_ | 7.2551   | -2.859   | -1.80225 | 0.142993 | 0.401409 | DOWN | 630.275  | 630.2739 |
| 2278 | M410T20  | 3.998506 | 1.999461 | 1.79417  | 0.143049 | 0.401434 | UP   | 410.2342 | 410.2341 |
| 2279 | M1726T9_ | 8.790269 | 3.135907 | 1.798893 | 0.143073 | 0.401444 | UP   | 1725.74  | 1725.738 |
| 2280 | M317T26_ | 3.853346 | 1.946112 | 1.767857 | 0.143179 | 0.401491 | UP   | 317.2116 | 317.2112 |
| 2281 | M709T10_ | 2.424038 | 1.277412 | 1.662729 | 0.143202 | 0.401501 | UP   | 708.5478 | 708.5461 |
| 2282 | M447T18  | 2.291733 | -1.19644 | -1.64212 | 0.143217 | 0.401508 | DOWN | 447.0082 | 447.0081 |
| 2283 | M365T2   | 338.6663 | 8.403721 | 1.817944 | 0.143219 | 0.401508 | UP   | 364.7977 | 364.7975 |
| 2284 | M460T32  | 2.066131 | -1.04693 | -1.73775 | 0.143441 | 0.401606 | DOWN | 460.3424 | 460.342  |
| 2285 | M652T26  | 61.28984 | 5.937576 | 1.816097 | 0.143484 | 0.401625 | UP   | 652.1957 | 652.1948 |
| 2286 | M647T32  | 30.11308 | -4.91232 | -1.81573 | 0.143501 | 0.401632 | DOWN | 647.2648 | 647.2643 |
| 2287 | M564T33_ | 2.730749 | 1.449296 | 1.798712 | 0.143546 | 0.401652 | UP   | 564.3882 | 564.38   |
| 2288 | M466T37  | 2.079582 | -1.05629 | -1.64991 | 0.143577 | 0.401666 | DOWN | 466.1258 | 466.1255 |
| 2289 | M759T29_ | 37.6583  | 5.234896 | 1.814243 | 0.143682 | 0.401712 | UP   | 759.3409 | 759.3401 |
| 2290 | M779T41  | 3.213411 | 1.684105 | 1.7454   | 0.143733 | 0.401734 | UP   | 779.2613 | 779.2607 |
| 2291 | M340T10_ | 10.88481 | 3.444245 | 1.813466 | 0.143763 | 0.401747 | UP   | 340.1139 | 340.1064 |
| 2292 | M693T33_ | 10.76102 | 3.427743 | 1.813198 | 0.143818 | 0.401771 | UP   | 693.4029 | 693.4024 |
| 2293 | M378T17  | 62.1978  | 5.958792 | 1.814181 | 0.143844 | 0.401782 | UP   | 378.2178 | 378.2176 |
| 2294 | M401T18_ | 2.224512 | 1.153489 | 1.627698 | 0.144145 | 0.401914 | UP   | 401.0307 | 401.0306 |
| 2295 | M432T20_ | 46.52174 | 5.539833 | 1.81149  | 0.144272 | 0.401969 | UP   | 432.2015 | 432.2013 |
| 2296 | M411T24_ | 2.159976 | 1.111015 | 1.703976 | 0.144445 | 0.402044 | UP   | 411.1677 | 411.1676 |
| 2297 | M398T29_ | 3.296073 | 1.720748 | 1.619379 | 0.144447 | 0.402045 | UP   | 397.5605 | 397.56   |
| 2298 | M398T10  | 2.577253 | 1.365834 | 1.641278 | 0.144476 | 0.402057 | UP   | 397.7885 | 397.7873 |
| 2299 | M351T31_ | 3.258397 | 1.704162 | 1.616843 | 0.144591 | 0.402108 | UP   | 350.6034 | 350.6033 |
| 2300 | M447T23  | 2.227903 | -1.15569 | -1.76534 | 0.144835 | 0.402213 | DOWN | 447.257  | 447.2561 |
| 2301 | M178T17_ | 6.118646 | 2.613213 | 1.77498  | 0.144837 | 0.402214 | UP   | 177.7405 | 177.7405 |
| 2302 | M946T44  | 3.04102  | 1.604555 | 1.670026 | 0.144837 | 0.402214 | UP   | 945.5556 | 945.5542 |

|      |          |          |          |          |          |          |      |          |          |
|------|----------|----------|----------|----------|----------|----------|------|----------|----------|
| 2303 | M1056T44 | 1.579792 | 0.659734 | 1.623108 | 0.144857 | 0.402222 | UP   | 1055.777 | 1055.777 |
| 2304 | M741T43  | 1.240807 | 0.311278 | 1.616186 | 0.144878 | 0.402232 | UP   | 740.5522 | 740.5517 |
| 2305 | M375T26  | 14.74291 | 3.881949 | 1.797033 | 0.144912 | 0.402246 | UP   | 375.2538 | 375.2534 |
| 2306 | M604T29  | 4.240705 | -2.0843  | -1.76662 | 0.144987 | 0.402279 | DOWN | 604.2922 | 604.2912 |
| 2307 | M536T26_ | 752.5621 | 9.555667 | 1.806723 | 0.145099 | 0.402327 | UP   | 536.3485 | 536.3481 |
| 2308 | M361T11_ | 2.132929 | 1.092836 | 1.614926 | 0.145109 | 0.402331 | UP   | 361.2166 | 361.2152 |
| 2309 | M270T26_ | 3.458154 | 1.790002 | 1.710771 | 0.145141 | 0.402345 | UP   | 270.2147 | 270.2144 |
| 2310 | M510T32_ | 1.882469 | -0.91263 | -1.61369 | 0.14527  | 0.402401 | DOWN | 510.372  | 510.3716 |
| 2311 | M347T13_ | 3.168917 | -1.66399 | -1.66349 | 0.145337 | 0.402429 | DOWN | 347.1307 | 347.1305 |
| 2312 | M558T31_ | 4.80428  | -2.26432 | -1.79693 | 0.145358 | 0.402438 | DOWN | 558.2525 | 558.2519 |
| 2313 | M848T10  | 5.41291  | 2.436404 | 1.784598 | 0.145499 | 0.402499 | UP   | 847.6846 | 847.6828 |
| 2314 | M659T34  | 1.682162 | 0.750317 | 1.618817 | 0.14551  | 0.402503 | UP   | 659.4928 | 659.4912 |
| 2315 | M433T9   | 3.457859 | -1.78988 | -1.7906  | 0.14559  | 0.402538 | DOWN | 433.2833 | 433.2833 |
| 2316 | M345T32_ | 5.486158 | -2.4558  | -1.79782 | 0.145602 | 0.402543 | DOWN | 345.1516 | 345.1512 |
| 2317 | M325T31_ | 2.900443 | 1.536273 | 1.63702  | 0.145676 | 0.402574 | UP   | 324.5982 | 324.5978 |
| 2318 | M385T9_2 | 2.599829 | -1.37842 | -1.611   | 0.145877 | 0.40266  | DOWN | 384.7717 | 384.7714 |
| 2319 | M641T31_ | 3.226491 | 1.689966 | 1.610697 | 0.145938 | 0.402686 | UP   | 640.9549 | 640.9546 |
| 2320 | M1385T9_ | 7.554917 | 2.917416 | 1.763817 | 0.146147 | 0.402775 | UP   | 1384.983 | 1384.979 |
| 2321 | M516T43  | 1.575461 | 0.655774 | 1.648498 | 0.146349 | 0.402861 | UP   | 516.3318 | 516.3314 |
| 2322 | M632T32  | 7.82297  | -2.96772 | -1.78438 | 0.146353 | 0.402863 | DOWN | 632.2717 | 632.2708 |
| 2323 | M331T11_ | 54.98637 | 5.781002 | 1.798969 | 0.146381 | 0.402875 | UP   | 331.0306 | 331.0305 |
| 2324 | M195T11_ | 6.217872 | 2.636421 | 1.776946 | 0.146387 | 0.402877 | UP   | 195.0919 | 195.0917 |
| 2325 | M917T10  | 4.243901 | 2.085391 | 1.712834 | 0.1465   | 0.402925 | UP   | 916.573  | 916.5722 |
| 2326 | M561T29_ | 2.228775 | 1.156251 | 1.64394  | 0.146731 | 0.403023 | UP   | 561.4045 | 561.4038 |
| 2327 | M349T10_ | 5.284266 | 2.401703 | 1.760364 | 0.146756 | 0.403033 | UP   | 349.2093 | 349.2089 |
| 2328 | M485T22_ | 7.919876 | 2.985478 | 1.776887 | 0.146763 | 0.403036 | UP   | 485.0928 | 485.0926 |
| 2329 | M454T35  | 3.679776 | 1.879618 | 1.64303  | 0.146894 | 0.403092 | UP   | 454.3891 | 454.389  |
| 2330 | M1387T9_ | 7.913235 | 2.984268 | 1.762098 | 0.146935 | 0.403109 | UP   | 1386.987 | 1386.981 |
| 2331 | M594T28_ | 54.60725 | 5.771021 | 1.795658 | 0.146956 | 0.403118 | UP   | 594.0919 | 594.0917 |
| 2332 | M445T23  | 8.639858 | -3.11101 | -1.78865 | 0.147002 | 0.403137 | DOWN | 444.9902 | 444.9901 |
| 2333 | M328T26_ | 7.634789 | 2.932588 | 1.752856 | 0.147023 | 0.403146 | UP   | 327.5647 | 327.5646 |
| 2334 | M658T35_ | 1.397837 | -0.4832  | -1.70734 | 0.147045 | 0.403155 | DOWN | 658.4473 | 658.4464 |
| 2335 | M753T23  | 7.34855  | 2.87746  | 1.749708 | 0.147098 | 0.403178 | UP   | 752.8924 | 752.8918 |
| 2336 | M664T38  | 1.681082 | 0.749391 | 1.684122 | 0.1471   | 0.403178 | UP   | 664.4298 | 664.4295 |
| 2337 | M1384T9_ | 7.011052 | 2.809631 | 1.753003 | 0.147113 | 0.403184 | UP   | 1384.485 | 1384.478 |
| 2338 | M712T43_ | 1.352872 | 0.436026 | 1.618184 | 0.147124 | 0.403189 | UP   | 711.5055 | 711.5046 |
| 2339 | M755T10_ | 9.863597 | 3.302114 | 1.774454 | 0.147231 | 0.403234 | UP   | 755.1291 | 755.129  |
| 2340 | M366T25  | 282.0296 | 8.139703 | 1.79417  | 0.147233 | 0.403234 | UP   | 366.1354 | 366.1352 |
| 2341 | M747T10  | 4.825475 | 2.270671 | 1.716634 | 0.147246 | 0.40324  | UP   | 746.9675 | 746.9663 |
| 2342 | M611T25  | 309.0626 | 8.271755 | 1.794079 | 0.147249 | 0.403241 | UP   | 611.3893 | 611.3892 |
| 2343 | M446T37  | 1.858413 | -0.89407 | -1.6892  | 0.147304 | 0.403264 | DOWN | 446.119  | 446.1183 |
| 2344 | M668T30  | 34.8623  | -5.1236  | -1.79226 | 0.147445 | 0.403324 | DOWN | 668.2456 | 668.2454 |
| 2345 | M558T11  | 2.940562 | 1.556092 | 1.664639 | 0.147459 | 0.403329 | UP   | 558.3496 | 558.3486 |
| 2346 | M505T42  | 2.705522 | -1.43591 | -1.78774 | 0.147479 | 0.403338 | DOWN | 505.0579 | 505.0569 |
| 2347 | M706T12  | 5.068397 | 2.34153  | 1.744446 | 0.147528 | 0.403358 | UP   | 705.5733 | 705.573  |
| 2348 | M284T16_ | 2.242021 | 1.164799 | 1.685879 | 0.147661 | 0.403414 | UP   | 284.0986 | 284.0984 |
| 2349 | M289T33_ | 2.478599 | -1.30952 | -1.72711 | 0.14786  | 0.403497 | DOWN | 289.1802 | 289.1802 |

|      |          |          |          |          |          |          |      |          |          |
|------|----------|----------|----------|----------|----------|----------|------|----------|----------|
| 2350 | M387T41  | 3.521854 | 1.816335 | 1.714166 | 0.147951 | 0.403535 | UP   | 387.1425 | 387.1423 |
| 2351 | M504T18  | 2.681317 | 1.422942 | 1.614991 | 0.148126 | 0.403607 | UP   | 503.9346 | 503.934  |
| 2352 | M518T24  | 92.91765 | 6.537881 | 1.788731 | 0.148169 | 0.403625 | UP   | 518.338  | 518.3379 |
| 2353 | M312T30_ | 2.932164 | 1.551966 | 1.692592 | 0.148302 | 0.403681 | UP   | 311.5416 | 311.5411 |
| 2354 | M448T32_ | 3.584215 | 1.841657 | 1.610391 | 0.148328 | 0.403691 | UP   | 448.0353 | 448.0352 |
| 2355 | M453T17  | 3.880227 | 1.956141 | 1.642428 | 0.148381 | 0.403713 | UP   | 452.9795 | 452.9793 |
| 2356 | M650T44  | 1.839234 | 0.879105 | 1.732329 | 0.148754 | 0.403868 | UP   | 650.4653 | 650.4641 |
| 2357 | M306T29  | 4.582219 | -2.19605 | -1.75722 | 0.148822 | 0.403896 | DOWN | 305.6279 | 305.6277 |
| 2358 | M251T27  | 2.187401 | -1.12922 | -1.69242 | 0.148923 | 0.403937 | DOWN | 251.0704 | 251.0701 |
| 2359 | M201T16  | 3.604226 | -1.84969 | -1.75682 | 0.149039 | 0.403985 | DOWN | 201.0465 | 201.0463 |
| 2360 | M294T30  | 2.388807 | 1.25629  | 1.637682 | 0.149295 | 0.40409  | UP   | 294.2149 | 294.2145 |
| 2361 | M503T44  | 1.824115 | 0.867197 | 1.749638 | 0.149559 | 0.404198 | UP   | 503.2667 | 503.266  |
| 2362 | M849T10_ | 5.949035 | 2.572656 | 1.734256 | 0.149704 | 0.404258 | UP   | 848.5159 | 848.5146 |
| 2363 | M438T12  | 563.7678 | 9.138957 | 1.778347 | 0.149973 | 0.404367 | UP   | 438.2391 | 438.2388 |
| 2364 | M540T31  | 3.179498 | 1.668799 | 1.592007 | 0.150057 | 0.404402 | UP   | 540.0469 | 540.0463 |
| 2365 | M1045T9_ | 5.941587 | 2.570848 | 1.720426 | 0.150113 | 0.404424 | UP   | 1045.231 | 1045.229 |
| 2366 | M634T32  | 8.097178 | -3.01742 | -1.76668 | 0.150117 | 0.404426 | DOWN | 634.27   | 634.2691 |
| 2367 | M539T42_ | 1.184654 | 0.244466 | 1.609627 | 0.150145 | 0.404438 | UP   | 539.384  | 539.3828 |
| 2368 | M379T17  | 115.8696 | 6.856359 | 1.775511 | 0.150467 | 0.404568 | UP   | 379.2212 | 379.221  |
| 2369 | M276T36  | 1.959702 | 0.970634 | 1.75605  | 0.150513 | 0.404586 | UP   | 276.2041 | 276.204  |
| 2370 | M558T34  | 1.774613 | 0.827504 | 1.616351 | 0.150538 | 0.404597 | UP   | 558.4729 | 558.4719 |
| 2371 | M502T32  | 1.679846 | 0.748329 | 1.621531 | 0.150576 | 0.404612 | UP   | 502.3481 | 502.3476 |
| 2372 | M509T32_ | 5.814258 | 2.539595 | 1.693057 | 0.150841 | 0.404719 | UP   | 508.9415 | 508.9413 |
| 2373 | M307T31_ | 4.034361 | 2.01234  | 1.635645 | 0.150868 | 0.40473  | UP   | 307.1189 | 307.1185 |
| 2374 | M405T15  | 2.164953 | 1.114336 | 1.592395 | 0.151018 | 0.40479  | UP   | 405.3115 | 405.3113 |
| 2375 | M163T4   | 2.606219 | 1.381958 | 1.62353  | 0.151068 | 0.40481  | UP   | 162.9735 | 162.9732 |
| 2376 | M532T30_ | 1.204208 | 0.268085 | 1.587468 | 0.151115 | 0.404829 | UP   | 532.3845 | 532.3836 |
| 2377 | M721T11  | 3.064783 | 1.615785 | 1.613086 | 0.151182 | 0.404856 | UP   | 720.7828 | 720.782  |
| 2378 | M487T32  | 2.431004 | 1.281552 | 1.677703 | 0.15119  | 0.404859 | UP   | 487.0835 | 487.0829 |
| 2379 | M350T18  | 32.183   | 5.008227 | 1.77118  | 0.151219 | 0.404871 | UP   | 350.2229 | 350.2229 |
| 2380 | M609T10  | 2.373729 | 1.247155 | 1.586654 | 0.151262 | 0.404888 | UP   | 609.0316 | 609.03   |
| 2381 | M487T20  | 32.84773 | 5.037722 | 1.770056 | 0.151414 | 0.404949 | UP   | 487.1879 | 487.1878 |
| 2382 | M441T23  | 3.759085 | -1.91038 | -1.76094 | 0.151517 | 0.404991 | DOWN | 440.9941 | 440.994  |
| 2383 | M312T29_ | 2.709413 | 1.43798  | 1.585305 | 0.151586 | 0.405018 | UP   | 312.0298 | 312.0295 |
| 2384 | M345T35  | 2.155087 | 1.107746 | 1.717463 | 0.151707 | 0.405066 | UP   | 345.2402 | 345.2401 |
| 2385 | M535T24_ | 622.5675 | 9.282087 | 1.768458 | 0.151712 | 0.405069 | UP   | 535.2436 | 535.2432 |
| 2386 | M291T29_ | 2.846205 | 1.50904  | 1.589316 | 0.151723 | 0.405073 | UP   | 290.628  | 290.6271 |
| 2387 | M363T18  | 3.165683 | 1.662517 | 1.626317 | 0.151803 | 0.405105 | UP   | 362.9831 | 362.9826 |
| 2388 | M456T21_ | 5.671835 | 2.503816 | 1.766806 | 0.151846 | 0.405122 | UP   | 456.2942 | 456.294  |
| 2389 | M442T21_ | 7.575378 | 2.921318 | 1.761564 | 0.151904 | 0.405145 | UP   | 442.2491 | 442.249  |
| 2390 | M550T23  | 44.59158 | 5.478699 | 1.766825 | 0.151988 | 0.405179 | UP   | 550.3279 | 550.3276 |
| 2391 | M1387T9_ | 6.710756 | 2.746475 | 1.732365 | 0.152063 | 0.405208 | UP   | 1387.488 | 1387.487 |
| 2392 | M1048T9_ | 7.35647  | 2.879014 | 1.745408 | 0.152194 | 0.40526  | UP   | 1048.232 | 1048.231 |
| 2393 | M653T29  | 7.013455 | -2.81013 | -1.73805 | 0.152235 | 0.405277 | DOWN | 653.2955 | 653.2951 |
| 2394 | M591T31_ | 3.294271 | -1.71996 | -1.70316 | 0.152252 | 0.405283 | DOWN | 591.262  | 591.2612 |
| 2395 | M340T32_ | 2.968615 | 1.56979  | 1.583642 | 0.152283 | 0.405296 | UP   | 340.1058 | 340.1053 |
| 2396 | M333T37_ | 2.192831 | 1.132795 | 1.640901 | 0.152302 | 0.405303 | UP   | 333.316  | 333.3145 |

|      |          |          |          |          |          |          |      |          |          |
|------|----------|----------|----------|----------|----------|----------|------|----------|----------|
| 2397 | M265T2   | 2730.074 | 11.41472 | 1.764895 | 0.152344 | 0.40532  | UP   | 264.8727 | 264.8725 |
| 2398 | M685T39  | 7.68959  | 2.942907 | 1.762486 | 0.152465 | 0.405368 | UP   | 684.5206 | 684.5205 |
| 2399 | M472T33  | 4.843076 | 2.275924 | 1.750622 | 0.1526   | 0.405421 | UP   | 472.1709 | 472.1706 |
| 2400 | M441T11  | 3.56977  | 1.835831 | 1.637374 | 0.152682 | 0.405454 | UP   | 441.2314 | 441.2299 |
| 2401 | M415T23_ | 8.095243 | 3.017074 | 1.748178 | 0.152708 | 0.405464 | UP   | 415.2297 | 415.224  |
| 2402 | M831T32  | 1.80978  | 0.855814 | 1.580294 | 0.152818 | 0.405507 | UP   | 830.5483 | 830.5465 |
| 2403 | M456T10_ | 2.660916 | 1.411923 | 1.594138 | 0.152883 | 0.405533 | UP   | 456.2499 | 456.2494 |
| 2404 | M910T32  | 35.31214 | -5.14209 | -1.76039 | 0.153083 | 0.405612 | DOWN | 910.4615 | 910.4615 |
| 2405 | M301T31_ | 2.749174 | 1.458998 | 1.578563 | 0.153103 | 0.40562  | UP   | 300.6411 | 300.6408 |
| 2406 | M544T20_ | 2.110157 | -1.07735 | -1.65274 | 0.153217 | 0.405664 | DOWN | 544.3041 | 544.3038 |
| 2407 | M368T13  | 70.79288 | 6.145532 | 1.759796 | 0.153235 | 0.405671 | UP   | 368.2335 | 368.2333 |
| 2408 | M585T32  | 8.61746  | -3.10726 | -1.75199 | 0.153406 | 0.405738 | DOWN | 585.2721 | 585.2716 |
| 2409 | M219T2_1 | 1864.017 | 10.8642  | 1.757485 | 0.153667 | 0.405841 | UP   | 218.8674 | 218.8671 |
| 2410 | M318T28  | 5.307551 | 2.408046 | 1.705874 | 0.154147 | 0.406027 | UP   | 318.064  | 318.0635 |
| 2411 | M331T28  | 2.439811 | 1.286769 | 1.716155 | 0.15427  | 0.406075 | UP   | 330.5007 | 330.5003 |
| 2412 | M498T9_1 | 2.675655 | -1.41989 | -1.67779 | 0.1543   | 0.406087 | DOWN | 498.3648 | 498.3639 |
| 2413 | M921T44_ | 2.016805 | 1.012072 | 1.643869 | 0.154346 | 0.406105 | UP   | 920.5961 | 920.5944 |
| 2414 | M576T9   | 14.28348 | -3.83628 | -1.74967 | 0.154397 | 0.406124 | DOWN | 576.3689 | 576.3687 |
| 2415 | M403T34  | 2.54936  | 1.350135 | 1.606349 | 0.154455 | 0.406147 | UP   | 402.7923 | 402.7916 |
| 2416 | M542T31  | 2.874616 | 1.523369 | 1.583133 | 0.154531 | 0.406176 | UP   | 542.042  | 542.0419 |
| 2417 | M1386T10 | 7.311861 | 2.870239 | 1.718444 | 0.154617 | 0.40621  | UP   | 1385.984 | 1385.98  |
| 2418 | M423T29_ | 3.211753 | 1.683361 | 1.572215 | 0.154872 | 0.406308 | UP   | 422.5609 | 422.5603 |
| 2419 | M454T9_1 | 2.940441 | -1.55603 | -1.62974 | 0.154883 | 0.406312 | DOWN | 454.4523 | 454.4452 |
| 2420 | M203T22  | 2.2275   | 1.155426 | 1.584311 | 0.154902 | 0.40632  | UP   | 203.1644 | 203.1641 |
| 2421 | M664T26  | 60.6208  | 5.921741 | 1.750385 | 0.154932 | 0.406331 | UP   | 664.1959 | 664.1954 |
| 2422 | M368T18_ | 6.659924 | 2.735506 | 1.746949 | 0.154947 | 0.406337 | UP   | 368.2245 | 368.2243 |
| 2423 | M512T23_ | 4.990296 | 2.319125 | 1.700321 | 0.155046 | 0.406375 | UP   | 512.0183 | 512.018  |
| 2424 | M652T24  | 31.61562 | 4.982566 | 1.749312 | 0.155108 | 0.406399 | UP   | 652.2942 | 652.294  |
| 2425 | M551T31_ | 105.9348 | 6.727033 | 1.748587 | 0.155267 | 0.40646  | UP   | 551.078  | 551.0779 |
| 2426 | M524T33  | 2.46218  | -1.29994 | -1.67916 | 0.155342 | 0.406489 | DOWN | 524.3345 | 524.3341 |
| 2427 | M364T26  | 1.932738 | 0.950646 | 1.649501 | 0.155367 | 0.406498 | UP   | 364.1576 | 364.1573 |
| 2428 | M849T39_ | 48.30139 | 5.593993 | 1.747171 | 0.155448 | 0.406529 | UP   | 848.6587 | 848.6579 |
| 2429 | M514T23  | 2.040817 | -1.02915 | -1.66613 | 0.155533 | 0.406562 | DOWN | 514.3163 | 514.3151 |
| 2430 | M376T27  | 2.708154 | 1.43731  | 1.584275 | 0.155621 | 0.406595 | UP   | 376.1211 | 376.1204 |
| 2431 | M283T14  | 4.434289 | 2.148703 | 1.719632 | 0.155671 | 0.406615 | UP   | 283.0479 | 283.0479 |
| 2432 | M333T22_ | 4.238287 | 2.083481 | 1.679527 | 0.155769 | 0.406652 | UP   | 333.1018 | 333.1016 |
| 2433 | M185T21  | 2.316149 | 1.211728 | 1.667873 | 0.155921 | 0.40671  | UP   | 185.0516 | 185.0514 |
| 2434 | M547T38  | 4.682783 | 2.227366 | 1.635189 | 0.15598  | 0.406732 | UP   | 547.0011 | 547.0007 |
| 2435 | M551T23  | 72.25549 | 6.175035 | 1.744664 | 0.155982 | 0.406733 | UP   | 551.3312 | 551.3309 |
| 2436 | M367T38  | 1.929749 | 0.948413 | 1.565435 | 0.156137 | 0.406792 | UP   | 367.1891 | 367.1889 |
| 2437 | M472T30_ | 1.48144  | -0.567   | -1.62388 | 0.156151 | 0.406798 | DOWN | 472.3348 | 472.3342 |
| 2438 | M515T23_ | 2.576439 | 1.365378 | 1.565945 | 0.156195 | 0.406814 | UP   | 515.1364 | 515.1353 |
| 2439 | M459T29_ | 3.206465 | 1.680984 | 1.564873 | 0.156265 | 0.406841 | UP   | 459.0272 | 459.0266 |
| 2440 | M668T43_ | 1.224477 | 0.292166 | 1.673087 | 0.156342 | 0.40687  | UP   | 668.4823 | 668.4809 |
| 2441 | M445T18_ | 2.192992 | -1.1329  | -1.64774 | 0.156343 | 0.40687  | DOWN | 445.0819 | 445.0815 |
| 2442 | M509T22_ | 25.80223 | 4.689424 | 1.741751 | 0.156487 | 0.406925 | UP   | 509.3206 | 509.3204 |
| 2443 | M388T9   | 4.215707 | -2.07577 | -1.71021 | 0.156509 | 0.406933 | DOWN | 388.2539 | 388.2536 |

|      |          |          |          |          |          |          |      |          |          |
|------|----------|----------|----------|----------|----------|----------|------|----------|----------|
| 2444 | M482T2   | 65.06489 | 6.023807 | 1.739835 | 0.156765 | 0.40703  | UP   | 481.8169 | 481.8167 |
| 2445 | M550T28  | 1.394654 | -0.47991 | -1.56554 | 0.156768 | 0.407031 | DOWN | 550.2765 | 550.2754 |
| 2446 | M470T44_ | 1.141132 | 0.190466 | 1.565527 | 0.156821 | 0.407051 | UP   | 470.3638 | 470.3631 |
| 2447 | M483T19_ | 3.14199  | 1.651679 | 1.606841 | 0.156847 | 0.407061 | UP   | 483.1679 | 483.1677 |
| 2448 | M575T43  | 13.80068 | 3.786667 | 1.731181 | 0.156984 | 0.407113 | UP   | 575.0326 | 575.0323 |
| 2449 | M316T26_ | 4.109279 | 2.038885 | 1.634472 | 0.157056 | 0.40714  | UP   | 316.0634 | 316.0632 |
| 2450 | M465T37  | 1.575735 | -0.65603 | -1.62929 | 0.157231 | 0.407206 | DOWN | 465.1273 | 465.1268 |
| 2451 | M403T31  | 2.089679 | 1.063281 | 1.677785 | 0.157318 | 0.407238 | UP   | 403.1797 | 403.1794 |
| 2452 | M401T21_ | 1.66602  | -0.73641 | -1.57923 | 0.157453 | 0.407289 | DOWN | 401.1631 | 401.1627 |
| 2453 | M324T13_ | 4.783053 | 2.257932 | 1.732049 | 0.157546 | 0.407324 | UP   | 324.2073 | 324.2021 |
| 2454 | M505T22  | 11.20484 | 3.48605  | 1.734882 | 0.157679 | 0.407374 | UP   | 505.2346 | 505.2344 |
| 2455 | M682T10_ | 3.031144 | 1.599863 | 1.655251 | 0.15774  | 0.407396 | UP   | 681.5186 | 681.5161 |
| 2456 | M746T41  | 6.005066 | -2.58618 | -1.72712 | 0.158107 | 0.407533 | DOWN | 746.2282 | 746.2269 |
| 2457 | M414T26  | 2.937884 | 1.554777 | 1.566435 | 0.158114 | 0.407536 | UP   | 414.0302 | 414.0286 |
| 2458 | M710T9_6 | 19.05704 | -4.25225 | -1.73162 | 0.158149 | 0.407549 | DOWN | 710.3646 | 710.364  |
| 2459 | M818T35  | 1.920672 | -0.94161 | -1.58772 | 0.158499 | 0.407678 | DOWN | 818.4533 | 818.4522 |
| 2460 | M428T27_ | 57.60601 | 5.848147 | 1.730459 | 0.158579 | 0.407708 | UP   | 428.27   | 428.2697 |
| 2461 | M703T37  | 3.884629 | 1.957777 | 1.705397 | 0.15873  | 0.407764 | UP   | 702.5366 | 702.5365 |
| 2462 | M927T44  | 1.674412 | 0.743655 | 1.564162 | 0.158774 | 0.40778  | UP   | 926.589  | 926.5872 |
| 2463 | M424T14_ | 5.19724  | 2.377746 | 1.688541 | 0.158945 | 0.407844 | UP   | 424.2236 | 424.2235 |
| 2464 | M329T42  | 3.631886 | -1.86072 | -1.71721 | 0.159082 | 0.407894 | DOWN | 329.3243 | 329.3237 |
| 2465 | M413T10_ | 6.171464 | 2.625613 | 1.699961 | 0.159121 | 0.407908 | UP   | 412.8136 | 412.8048 |
| 2466 | M475T20  | 96.56121 | 6.593372 | 1.727032 | 0.159216 | 0.407943 | UP   | 475.1259 | 475.1257 |
| 2467 | M278T28_ | 3.686974 | 1.882437 | 1.638355 | 0.159246 | 0.407954 | UP   | 277.6122 | 277.6119 |
| 2468 | M624T17_ | 69.52765 | 6.119515 | 1.726851 | 0.159265 | 0.407961 | UP   | 624.3287 | 624.3283 |
| 2469 | M482T43  | 32.26518 | 5.011906 | 1.726013 | 0.159311 | 0.407978 | UP   | 481.871  | 481.8708 |
| 2470 | M290T29_ | 2.599734 | 1.378364 | 1.553448 | 0.159381 | 0.408004 | UP   | 289.6313 | 289.631  |
| 2471 | M921T44_ | 1.496833 | 0.581913 | 1.553478 | 0.159397 | 0.40801  | UP   | 920.6891 | 920.6874 |
| 2472 | M599T27  | 22.83939 | 4.513452 | 1.72513  | 0.159423 | 0.408019 | UP   | 599.2309 | 599.2308 |
| 2473 | M289T21  | 3.695579 | 1.8858   | 1.670611 | 0.159453 | 0.40803  | UP   | 289.1145 | 289.1137 |
| 2474 | M419T28_ | 3.015167 | 1.592238 | 1.612678 | 0.159484 | 0.408042 | UP   | 419.135  | 419.1347 |
| 2475 | M417T29  | 18.02089 | 4.171598 | 1.7251   | 0.159544 | 0.408064 | UP   | 417.1906 | 417.1899 |
| 2476 | M538T26_ | 995.0769 | 9.958664 | 1.724577 | 0.159692 | 0.408118 | UP   | 538.3551 | 538.3546 |
| 2477 | M618T14  | 2.166327 | 1.115251 | 1.564509 | 0.159782 | 0.408151 | UP   | 618.4676 | 618.4662 |
| 2478 | M611T23  | 3.928581 | 1.974008 | 1.626288 | 0.159794 | 0.408155 | UP   | 610.9397 | 610.9396 |
| 2479 | M625T22_ | 44.97095 | 5.490922 | 1.723923 | 0.159811 | 0.408161 | UP   | 625.3686 | 625.3683 |
| 2480 | M377T38  | 2.129622 | -1.0906  | -1.6718  | 0.159881 | 0.408187 | DOWN | 377.1783 | 377.1778 |
| 2481 | M785T43  | 1.27636  | 0.352035 | 1.568728 | 0.159957 | 0.408215 | UP   | 784.5792 | 784.5775 |
| 2482 | M321T24_ | 11.54639 | 3.52937  | 1.719787 | 0.159999 | 0.40823  | UP   | 321.1792 | 321.1791 |
| 2483 | M642T29_ | 2.892118 | -1.53213 | -1.63166 | 0.160018 | 0.408237 | DOWN | 642.2296 | 642.2293 |
| 2484 | M319T2   | 2560.885 | 11.32243 | 1.722783 | 0.160028 | 0.40824  | UP   | 318.792  | 318.792  |
| 2485 | M350T21_ | 2.187031 | 1.128974 | 1.68337  | 0.160043 | 0.408246 | UP   | 350.2024 | 350.2021 |
| 2486 | M459T11  | 1.977053 | 0.983352 | 1.556525 | 0.160116 | 0.408273 | UP   | 459.1997 | 459.1984 |
| 2487 | M378T27  | 18.01342 | 4.171    | 1.717953 | 0.160449 | 0.408393 | UP   | 378.2543 | 378.2542 |
| 2488 | M610T44  | 1.611085 | 0.688032 | 1.630154 | 0.160462 | 0.408398 | UP   | 610.4417 | 610.4322 |
| 2489 | M1158T44 | 2.404141 | 1.265522 | 1.6243   | 0.160495 | 0.40841  | UP   | 1157.794 | 1157.789 |
| 2490 | M298T26  | 6.086646 | -2.60565 | -1.71124 | 0.160546 | 0.408429 | DOWN | 298.1326 | 298.1322 |

|      |          |          |          |          |          |          |      |          |          |
|------|----------|----------|----------|----------|----------|----------|------|----------|----------|
| 2491 | M333T37_ | 96.68485 | 6.595218 | 1.719546 | 0.160615 | 0.408454 | UP   | 333.0664 | 333.06   |
| 2492 | M432T32  | 9.514756 | 3.250167 | 1.695132 | 0.160639 | 0.408462 | UP   | 432.0326 | 432.0325 |
| 2493 | M515T44  | 1.19211  | 0.253517 | 1.549957 | 0.160645 | 0.408465 | UP   | 514.8915 | 514.8906 |
| 2494 | M387T32  | 3.103641 | 1.633962 | 1.667429 | 0.160672 | 0.408474 | UP   | 387.2302 | 387.23   |
| 2495 | M278T31_ | 2.046409 | 1.033094 | 1.559612 | 0.16083  | 0.408531 | UP   | 277.8104 | 277.8099 |
| 2496 | M395T37  | 26.21838 | 4.712507 | 1.718244 | 0.160843 | 0.408536 | UP   | 395.1642 | 395.1641 |
| 2497 | M635T26  | 18.31585 | 4.19502  | 1.717456 | 0.16095  | 0.408575 | UP   | 635.266  | 635.2657 |
| 2498 | M351T18  | 23.85465 | 4.576198 | 1.717405 | 0.161037 | 0.408606 | UP   | 351.2267 | 351.2262 |
| 2499 | M284T10  | 3.336879 | 1.738499 | 1.678742 | 0.161124 | 0.408637 | UP   | 283.9968 | 283.9968 |
| 2500 | M338T26  | 2.867746 | 1.519917 | 1.692435 | 0.161149 | 0.408647 | UP   | 338.2412 | 338.2411 |
| 2501 | M348T21_ | 9.263668 | 3.211583 | 1.713625 | 0.161449 | 0.408754 | UP   | 348.2073 | 348.2072 |
| 2502 | M389T18_ | 1.950364 | 0.963744 | 1.546503 | 0.161461 | 0.408759 | UP   | 389.0028 | 389.0024 |
| 2503 | M1047T9  | 6.378259 | 2.673163 | 1.676522 | 0.16148  | 0.408766 | UP   | 1047.232 | 1047.229 |
| 2504 | M509T26  | 3.572687 | 1.83701  | 1.590585 | 0.161593 | 0.408806 | UP   | 509.056  | 509.0556 |
| 2505 | M693T39  | 9.852088 | 3.30043  | 1.71035  | 0.161623 | 0.408817 | UP   | 693.4981 | 693.4981 |
| 2506 | M519T24  | 61.938   | 5.952753 | 1.713775 | 0.161718 | 0.408851 | UP   | 519.3414 | 519.3412 |
| 2507 | M378T28_ | 3.011637 | 1.590548 | 1.589107 | 0.161832 | 0.408892 | UP   | 378.1085 | 378.108  |
| 2508 | M744T29  | 2.620818 | 1.390017 | 1.546054 | 0.161968 | 0.40894  | UP   | 744.1904 | 744.1889 |
| 2509 | M564T18  | 2.723646 | 1.445539 | 1.551297 | 0.162041 | 0.408966 | UP   | 563.8345 | 563.8338 |
| 2510 | M713T31_ | 30.52537 | 4.931937 | 1.710602 | 0.162222 | 0.409031 | UP   | 713.3484 | 713.3483 |
| 2511 | M610T24  | 3.607854 | 1.851141 | 1.635147 | 0.162256 | 0.409043 | UP   | 610.3956 | 610.3944 |
| 2512 | M459T19  | 9.785681 | 3.290672 | 1.697026 | 0.162268 | 0.409047 | UP   | 459.0513 | 459.051  |
| 2513 | M720T29  | 2.503879 | 1.324165 | 1.543439 | 0.162292 | 0.409056 | UP   | 720.1905 | 720.1896 |
| 2514 | M886T29  | 2.73262  | 1.450285 | 1.540862 | 0.162359 | 0.40908  | UP   | 886.1267 | 886.126  |
| 2515 | M734T43_ | 1.340402 | 0.422666 | 1.547318 | 0.162364 | 0.409081 | UP   | 734.0202 | 734.0188 |
| 2516 | M525T41  | 2.001539 | -1.00111 | -1.59362 | 0.162693 | 0.409198 | DOWN | 525.1357 | 525.1328 |
| 2517 | M478T12_ | 2.260717 | 1.17678  | 1.594158 | 0.162768 | 0.409224 | UP   | 478.3254 | 478.3245 |
| 2518 | M498T12  | 155.3403 | 7.279288 | 1.708231 | 0.162777 | 0.409228 | UP   | 498.2964 | 498.2963 |
| 2519 | M263T11  | 2.528121 | 1.338066 | 1.650509 | 0.162874 | 0.409262 | UP   | 263.0793 | 263.079  |
| 2520 | M438T13_ | 2.885766 | 1.528954 | 1.604345 | 0.16305  | 0.409324 | UP   | 438.3694 | 438.3686 |
| 2521 | M276T31_ | 2.300555 | 1.201982 | 1.547882 | 0.163114 | 0.409347 | UP   | 276.135  | 276.1349 |
| 2522 | M611T10_ | 8.528539 | 3.092299 | 1.690433 | 0.163124 | 0.40935  | UP   | 611.2783 | 611.2782 |
| 2523 | M345T20_ | 257.8161 | 8.010198 | 1.705733 | 0.163254 | 0.409396 | UP   | 345.1173 | 345.1171 |
| 2524 | M621T9_1 | 10.78857 | -3.43143 | -1.70106 | 0.163342 | 0.409427 | DOWN | 621.3189 | 621.3178 |
| 2525 | M1023T33 | 2.41784  | 1.273719 | 1.544132 | 0.163344 | 0.409428 | UP   | 1022.758 | 1022.758 |
| 2526 | M262T22_ | 2.189785 | 1.130789 | 1.642536 | 0.163459 | 0.409468 | UP   | 262.0732 | 262.0731 |
| 2527 | M485T27  | 9.321174 | 3.220512 | 1.702159 | 0.163549 | 0.4095   | UP   | 485.1831 | 485.1826 |
| 2528 | M624T22_ | 22.35543 | 4.482553 | 1.703003 | 0.163702 | 0.409554 | UP   | 624.3652 | 624.3648 |
| 2529 | M533T26  | 72.72131 | 6.184306 | 1.702464 | 0.163878 | 0.409615 | UP   | 532.7614 | 532.7612 |
| 2530 | M429T27_ | 64.85004 | 6.019036 | 1.701814 | 0.163995 | 0.409656 | UP   | 429.2733 | 429.2729 |
| 2531 | M475T22  | 2.512686 | 1.329231 | 1.538357 | 0.164026 | 0.409667 | UP   | 474.9282 | 474.9277 |
| 2532 | M332T30  | 2.845078 | 1.508468 | 1.54098  | 0.16403  | 0.409668 | UP   | 331.5957 | 331.5955 |
| 2533 | M496T16  | 2.058172 | 1.041363 | 1.546206 | 0.164055 | 0.409677 | UP   | 496.3637 | 496.3633 |
| 2534 | M574T25  | 170.2276 | 7.411321 | 1.70132  | 0.164097 | 0.409692 | UP   | 574.2355 | 574.2353 |
| 2535 | M286T39  | 2.1731   | 1.119755 | 1.679919 | 0.164216 | 0.409733 | UP   | 286.2247 | 286.2246 |
| 2536 | M684T10_ | 2.918323 | 1.54514  | 1.63166  | 0.164428 | 0.409807 | UP   | 683.6418 | 683.6395 |
| 2537 | M387T30  | 5.387107 | -2.42951 | -1.68246 | 0.164562 | 0.409854 | DOWN | 387.0781 | 387.0776 |

|      |          |          |          |          |          |          |      |          |          |
|------|----------|----------|----------|----------|----------|----------|------|----------|----------|
| 2538 | M620T30  | 1.205342 | 0.269443 | 1.534059 | 0.164617 | 0.409873 | UP   | 620.4373 | 620.4362 |
| 2539 | M631T32_ | 8.459228 | -3.08053 | -1.68548 | 0.164628 | 0.409877 | DOWN | 631.2777 | 631.2773 |
| 2540 | M282T30_ | 2.688261 | 1.426673 | 1.53206  | 0.164759 | 0.409922 | UP   | 281.6334 | 281.6328 |
| 2541 | M791T37_ | 5.046158 | 2.335185 | 1.694745 | 0.164775 | 0.409928 | UP   | 790.617  | 790.6163 |
| 2542 | M483T9_2 | 2.958725 | 1.564976 | 1.642819 | 0.16489  | 0.409967 | UP   | 483.317  | 483.3048 |
| 2543 | M282T30_ | 2.801979 | 1.486446 | 1.528691 | 0.164894 | 0.409969 | UP   | 282.135  | 282.1345 |
| 2544 | M535T24_ | 9.092445 | 3.184668 | 1.690153 | 0.164924 | 0.409979 | UP   | 535.3354 | 535.3345 |
| 2545 | M905T41  | 19.58917 | 4.291985 | 1.696012 | 0.164927 | 0.40998  | UP   | 904.6948 | 904.6944 |
| 2546 | M271T11_ | 3.139318 | 1.650451 | 1.565933 | 0.164937 | 0.409984 | UP   | 271.0268 | 271.0265 |
| 2547 | M278T31_ | 2.031062 | 1.022235 | 1.532471 | 0.164947 | 0.409987 | UP   | 278.0797 | 278.0793 |
| 2548 | M377T31_ | 2.292413 | 1.196867 | 1.548065 | 0.165003 | 0.410007 | UP   | 376.9512 | 376.9508 |
| 2549 | M317T29  | 3.639948 | -1.86392 | -1.65676 | 0.165092 | 0.410037 | DOWN | 316.6287 | 316.6283 |
| 2550 | M657T31  | 2.904978 | 1.538527 | 1.528505 | 0.165125 | 0.410049 | UP   | 657.2363 | 657.2356 |
| 2551 | M430T25_ | 83.9109  | 6.390786 | 1.695925 | 0.16514  | 0.410054 | UP   | 430.2857 | 430.2855 |
| 2552 | M414T23_ | 1.48204  | 0.567585 | 1.532277 | 0.165175 | 0.410066 | UP   | 414.1995 | 414.1989 |
| 2553 | M621T9_2 | 31.85613 | -4.9935  | -1.69463 | 0.165227 | 0.410084 | DOWN | 621.444  | 621.4433 |
| 2554 | M258T23  | 2.732349 | 1.450142 | 1.587352 | 0.165327 | 0.410118 | UP   | 257.9714 | 257.9705 |
| 2555 | M1048T9_ | 6.216946 | 2.636206 | 1.656421 | 0.165498 | 0.410177 | UP   | 1047.733 | 1047.73  |
| 2556 | M690T43_ | 1.277132 | 0.352908 | 1.528717 | 0.165556 | 0.410197 | UP   | 689.994  | 689.9929 |
| 2557 | M394T19_ | 3.848791 | -1.94441 | -1.61095 | 0.16559  | 0.410209 | DOWN | 394.3271 | 394.3266 |
| 2558 | M599T10_ | 2.573214 | 1.363571 | 1.579697 | 0.16562  | 0.410219 | UP   | 599.3811 | 599.3801 |
| 2559 | M333T37_ | 168.1506 | 7.393611 | 1.692982 | 0.165711 | 0.41025  | UP   | 333.383  | 333.3795 |
| 2560 | M906T41  | 21.64561 | 4.436003 | 1.691767 | 0.165764 | 0.410268 | UP   | 905.6981 | 905.6978 |
| 2561 | M662T10  | 2.824639 | 1.498066 | 1.599098 | 0.165777 | 0.410273 | UP   | 661.5032 | 661.4974 |
| 2562 | M583T32  | 2.764513 | 1.467026 | 1.564455 | 0.165969 | 0.410339 | UP   | 583.4684 | 583.4676 |
| 2563 | M1046T10 | 6.589072 | 2.720075 | 1.652115 | 0.165978 | 0.410342 | UP   | 1046.23  | 1046.225 |
| 2564 | M279T22  | 1.523953 | -0.60782 | -1.64886 | 0.166008 | 0.410352 | DOWN | 279.1384 | 279.1375 |
| 2565 | M1012T44 | 1.588596 | 0.667752 | 1.526046 | 0.166036 | 0.410362 | UP   | 1011.751 | 1011.75  |
| 2566 | M499T20  | 95.75094 | 6.581215 | 1.690564 | 0.166181 | 0.410411 | UP   | 499.2242 | 499.2242 |
| 2567 | M340T42  | 1.199019 | 0.261855 | 1.537706 | 0.166283 | 0.410446 | UP   | 340.3938 | 340.3932 |
| 2568 | M681T10_ | 2.982702 | 1.57662  | 1.621662 | 0.16639  | 0.410483 | UP   | 680.515  | 680.5127 |
| 2569 | M335T39_ | 2.836533 | 1.504129 | 1.679617 | 0.16669  | 0.410585 | UP   | 335.2016 | 335.2005 |
| 2570 | M320T23_ | 3.094895 | 1.629891 | 1.525967 | 0.166709 | 0.410591 | UP   | 320.2699 | 320.2697 |
| 2571 | M742T29  | 2.594927 | 1.375694 | 1.524812 | 0.166781 | 0.410615 | UP   | 742.1953 | 742.193  |
| 2572 | M779T30  | 4.013283 | -2.00478 | -1.63111 | 0.16683  | 0.410632 | DOWN | 779.2034 | 779.2025 |
| 2573 | M693T11  | 60.53762 | 5.91976  | 1.686471 | 0.166944 | 0.410671 | UP   | 693.2426 | 693.2415 |
| 2574 | M439T12  | 242.2654 | 7.920445 | 1.686054 | 0.167063 | 0.410711 | UP   | 439.2424 | 439.2422 |
| 2575 | M385T44  | 4.86552  | -2.28259 | -1.67657 | 0.167068 | 0.410713 | DOWN | 385.331  | 385.3306 |
| 2576 | M934T9   | 4.497125 | 2.169003 | 1.637667 | 0.167109 | 0.410727 | UP   | 933.6462 | 933.6424 |
| 2577 | M1046T10 | 6.178526 | 2.627263 | 1.645542 | 0.167154 | 0.410742 | UP   | 1045.727 | 1045.724 |
| 2578 | M316T28_ | 2.995579 | 1.582835 | 1.562397 | 0.167163 | 0.410745 | UP   | 316.0635 | 316.0631 |
| 2579 | M652T32  | 44.9585  | -5.49052 | -1.68523 | 0.167183 | 0.410752 | DOWN | 652.2559 | 652.2556 |
| 2580 | M362T29_ | 2.800472 | 1.48567  | 1.525199 | 0.167201 | 0.410758 | UP   | 362.0974 | 362.0972 |
| 2581 | M351T4   | 43.25804 | -5.4349  | -1.68361 | 0.167517 | 0.410864 | DOWN | 351.0573 | 351.0573 |
| 2582 | M1047T10 | 6.171988 | 2.625735 | 1.643395 | 0.167574 | 0.410884 | UP   | 1046.73  | 1046.727 |
| 2583 | M462T41  | 48.5267  | 5.600707 | 1.683341 | 0.167579 | 0.410885 | UP   | 461.8653 | 461.8651 |
| 2584 | M456T12_ | 1.723305 | 0.785178 | 1.519636 | 0.167589 | 0.410889 | UP   | 456.3439 | 456.343  |

|      |          |          |          |          |          |          |      |          |          |
|------|----------|----------|----------|----------|----------|----------|------|----------|----------|
| 2585 | M683T10  | 4.195609 | 2.06888  | 1.621612 | 0.167626 | 0.410901 | UP   | 682.5225 | 682.5197 |
| 2586 | M259T9_1 | 3.206472 | -1.68099 | -1.61975 | 0.167802 | 0.41096  | DOWN | 258.6337 | 258.6332 |
| 2587 | M318T33  | 1.669483 | -0.7394  | -1.57895 | 0.16806  | 0.411047 | DOWN | 318.243  | 318.2426 |
| 2588 | M481T10_ | 16.18257 | 4.016369 | 1.680299 | 0.168134 | 0.411072 | UP   | 481.3382 | 481.3369 |
| 2589 | M312T29_ | 2.531652 | 1.340079 | 1.518747 | 0.168156 | 0.411079 | UP   | 312.1351 | 312.1348 |
| 2590 | M617T33  | 2.146673 | 1.102102 | 1.529429 | 0.168222 | 0.411101 | UP   | 617.435  | 617.4341 |
| 2591 | M333T10_ | 2.70608  | 1.436204 | 1.515729 | 0.16824  | 0.411107 | UP   | 333.1746 | 333.1743 |
| 2592 | M333T37_ | 99.70503 | 6.639594 | 1.680041 | 0.168247 | 0.411109 | UP   | 333.4664 | 333.4638 |
| 2593 | M500T30_ | 3.081113 | 1.623452 | 1.631575 | 0.168252 | 0.411111 | UP   | 500.4006 | 500.3998 |
| 2594 | M343T14  | 12.98238 | 3.698483 | 1.676001 | 0.168494 | 0.411192 | UP   | 343.1738 | 343.1731 |
| 2595 | M487T38  | 1.596561 | -0.67497 | -1.51987 | 0.16866  | 0.411247 | DOWN | 487.1285 | 487.1281 |
| 2596 | M677T34  | 3.466037 | 1.793287 | 1.639393 | 0.168673 | 0.411252 | UP   | 677.3608 | 677.3605 |
| 2597 | M372T28  | 1.579311 | -0.6593  | -1.51552 | 0.168685 | 0.411255 | DOWN | 372.3112 | 372.3107 |
| 2598 | M1045T9_ | 6.235847 | 2.640585 | 1.633619 | 0.16869  | 0.411257 | UP   | 1044.731 | 1044.729 |
| 2599 | M484T38  | 1.232852 | -0.302   | -1.55189 | 0.168715 | 0.411266 | DOWN | 484.1288 | 484.1279 |
| 2600 | M425T44  | 6.065764 | -2.60069 | -1.67643 | 0.168728 | 0.41127  | DOWN | 425.3231 | 425.3228 |
| 2601 | M572T13  | 19.03701 | 4.250735 | 1.675894 | 0.168865 | 0.411316 | UP   | 572.3125 | 572.3124 |
| 2602 | M497T30_ | 2.75563  | 1.462382 | 1.522482 | 0.168889 | 0.411323 | UP   | 497.1801 | 497.1797 |
| 2603 | M295T31_ | 2.419351 | 1.27462  | 1.523469 | 0.168947 | 0.411343 | UP   | 295.1488 | 295.1487 |
| 2604 | M516T23  | 2.584329 | 1.36979  | 1.513036 | 0.169035 | 0.411372 | UP   | 516.1398 | 516.1395 |
| 2605 | M362T26_ | 4.383892 | 2.132212 | 1.57829  | 0.169058 | 0.411379 | UP   | 362.1054 | 362.1053 |
| 2606 | M406T31  | 6.750668 | 2.75503  | 1.673222 | 0.169089 | 0.41139  | UP   | 406.2855 | 406.2853 |
| 2607 | M279T16  | 3.072118 | 1.619233 | 1.640891 | 0.169141 | 0.411407 | UP   | 279.0936 | 279.0812 |
| 2608 | M728T33  | 2.713233 | 1.440013 | 1.553282 | 0.169154 | 0.411411 | UP   | 727.5006 | 727.4995 |
| 2609 | M350T21_ | 102.6001 | 6.680889 | 1.675043 | 0.169234 | 0.411438 | UP   | 350.2231 | 350.2226 |
| 2610 | M562T25_ | 9.30415  | 3.217874 | 1.674234 | 0.169234 | 0.411438 | UP   | 562.2742 | 562.274  |
| 2611 | M680T10_ | 2.98596  | 1.578195 | 1.607977 | 0.169264 | 0.411448 | UP   | 679.512  | 679.5099 |
| 2612 | M181T4   | 43.32431 | 5.437105 | 1.673511 | 0.169449 | 0.411509 | UP   | 180.9464 | 180.9464 |
| 2613 | M396T33  | 1.619455 | -0.69551 | -1.52686 | 0.16961  | 0.411562 | DOWN | 396.1622 | 396.1619 |
| 2614 | M337T2   | 1832.557 | 10.83964 | 1.67169  | 0.169904 | 0.411659 | UP   | 336.8025 | 336.8024 |
| 2615 | M285T11  | 1.95027  | 0.963674 | 1.512588 | 0.169977 | 0.411683 | UP   | 285.1859 | 285.1854 |
| 2616 | M708T30_ | 1.208573 | 0.273304 | 1.519133 | 0.169999 | 0.41169  | UP   | 708.49   | 708.4887 |
| 2617 | M585T23  | 3.348604 | 1.74356  | 1.515233 | 0.170004 | 0.411692 | UP   | 585.1924 | 585.1916 |
| 2618 | M461T24_ | 6.312968 | -2.65832 | -1.65842 | 0.170041 | 0.411704 | DOWN | 461.1775 | 461.177  |
| 2619 | M474T23_ | 1.962456 | -0.97266 | -1.63228 | 0.170044 | 0.411705 | DOWN | 474.2849 | 474.284  |
| 2620 | M314T9_1 | 2.679455 | -1.42194 | -1.53427 | 0.170152 | 0.41174  | DOWN | 313.692  | 313.6919 |
| 2621 | M349T29  | 2.769877 | 1.469822 | 1.520126 | 0.170156 | 0.411742 | UP   | 348.5982 | 348.5979 |
| 2622 | M501T30  | 2.634818 | 1.397704 | 1.509069 | 0.170198 | 0.411755 | UP   | 501.1756 | 501.1749 |
| 2623 | M769T10_ | 3.518556 | 1.814984 | 1.564794 | 0.170354 | 0.411806 | UP   | 768.9807 | 768.9792 |
| 2624 | M224T32  | 1.94872  | -0.96253 | -1.64694 | 0.17036  | 0.411808 | DOWN | 224.0633 | 224.063  |
| 2625 | M480T37  | 1.600704 | -0.67871 | -1.58855 | 0.170383 | 0.411816 | DOWN | 480.157  | 480.1564 |
| 2626 | M651T11_ | 2.115427 | 1.080949 | 1.512375 | 0.17056  | 0.411874 | UP   | 651.3569 | 651.356  |
| 2627 | M473T11  | 3.646182 | -1.86639 | -1.64175 | 0.170585 | 0.411882 | DOWN | 473.1328 | 473.1318 |
| 2628 | M474T14  | 3.1931   | 1.674958 | 1.526697 | 0.170761 | 0.411939 | UP   | 474.2119 | 474.2116 |
| 2629 | M471T33  | 4.099944 | 2.035604 | 1.655338 | 0.170762 | 0.41194  | UP   | 471.1674 | 471.1673 |
| 2630 | M924T44_ | 1.661312 | 0.732323 | 1.509428 | 0.170799 | 0.411952 | UP   | 923.698  | 923.6953 |
| 2631 | M584T32  | 5.310303 | -2.40879 | -1.66074 | 0.170839 | 0.411965 | DOWN | 584.2687 | 584.2681 |



|      |          |          |          |          |          |          |      |          |          |
|------|----------|----------|----------|----------|----------|----------|------|----------|----------|
| 2632 | M323T25_ | 2.196294 | 1.135071 | 1.505106 | 0.170942 | 0.411998 | UP   | 323.4925 | 323.4921 |
| 2633 | M339T15_ | 2.843121 | 1.507475 | 1.632546 | 0.171169 | 0.412072 | UP   | 339.0741 | 339.0738 |
| 2634 | M446T23  | 1.966696 | -0.97577 | -1.63165 | 0.171297 | 0.412113 | DOWN | 446.2537 | 446.2527 |
| 2635 | M723T32  | 3.056746 | 1.611997 | 1.502825 | 0.171311 | 0.412118 | UP   | 723.2093 | 723.2076 |
| 2636 | M260T23_ | 2.853895 | 1.512932 | 1.57325  | 0.171358 | 0.412133 | UP   | 259.967  | 259.9666 |
| 2637 | M518T22  | 2.446313 | 1.290609 | 1.505467 | 0.171744 | 0.412258 | UP   | 517.9503 | 517.9498 |
| 2638 | M792T34  | 1.505038 | -0.5898  | -1.53723 | 0.172365 | 0.412458 | DOWN | 792.4383 | 792.437  |
| 2639 | M453T19_ | 1.928086 | 0.94717  | 1.531212 | 0.172401 | 0.412469 | UP   | 453.2598 | 453.2589 |
| 2640 | M416T24_ | 1.974391 | 0.981407 | 1.499684 | 0.17245  | 0.412485 | UP   | 416.0509 | 416.0503 |
| 2641 | M304T27  | 1.635071 | -0.70935 | -1.56265 | 0.172551 | 0.412517 | DOWN | 304.2274 | 304.2268 |
| 2642 | M1030T9  | 5.831331 | 2.543825 | 1.626648 | 0.172553 | 0.412518 | UP   | 1030.256 | 1030.255 |
| 2643 | M392T22  | 2.291028 | -1.196   | -1.50519 | 0.172688 | 0.412561 | DOWN | 392.0355 | 392.0353 |
| 2644 | M454T22_ | 17.52396 | 4.131257 | 1.656838 | 0.172745 | 0.412579 | UP   | 454.2239 | 454.2235 |
| 2645 | M613T23  | 2.583096 | 1.369101 | 1.5026   | 0.172949 | 0.412645 | UP   | 613.0667 | 613.0659 |
| 2646 | M555T28  | 1.710093 | 0.774075 | 1.497693 | 0.172987 | 0.412657 | UP   | 554.8986 | 554.8972 |
| 2647 | M415T22_ | 13.16965 | 3.719145 | 1.651819 | 0.173059 | 0.41268  | UP   | 415.2455 | 415.245  |
| 2648 | M659T43_ | 1.21724  | 0.283614 | 1.527897 | 0.173084 | 0.412687 | UP   | 659.4678 | 659.4665 |
| 2649 | M1493T43 | 2.553418 | 1.35243  | 1.536679 | 0.173086 | 0.412688 | UP   | 1493.03  | 1493.029 |
| 2650 | M682T30  | 4.576896 | -2.19437 | -1.62602 | 0.173186 | 0.41272  | DOWN | 682.2695 | 682.2693 |
| 2651 | M511T23_ | 3.98767  | 1.995546 | 1.588162 | 0.173258 | 0.412743 | UP   | 511.0148 | 511.0145 |
| 2652 | M355T32_ | 2.352975 | -1.23449 | -1.64825 | 0.173608 | 0.412854 | DOWN | 355.1097 | 355.1093 |
| 2653 | M413T23_ | 2.021803 | 1.015642 | 1.519339 | 0.173676 | 0.412876 | UP   | 413.196  | 413.1954 |
| 2654 | M717T30  | 3.499424 | 1.807117 | 1.5177   | 0.173708 | 0.412886 | UP   | 717.0366 | 717.0359 |
| 2655 | M638T33  | 3.955864 | 1.983993 | 1.57584  | 0.173813 | 0.412919 | UP   | 638.0209 | 638.0208 |
| 2656 | M326T31_ | 2.703053 | 1.43459  | 1.544595 | 0.173824 | 0.412922 | UP   | 325.5956 | 325.5955 |
| 2657 | M780T30_ | 3.077851 | -1.62192 | -1.5722  | 0.173842 | 0.412928 | DOWN | 780.197  | 780.1963 |
| 2658 | M667T12  | 2.803852 | 1.48741  | 1.52901  | 0.173988 | 0.412974 | UP   | 667.4802 | 667.4792 |
| 2659 | M467T17_ | 1.658672 | -0.73003 | -1.5456  | 0.174008 | 0.41298  | DOWN | 467.3484 | 467.3476 |
| 2660 | M629T10  | 4.913976 | 2.296891 | 1.591448 | 0.174059 | 0.412996 | UP   | 628.8554 | 628.8545 |
| 2661 | M827T10_ | 9.395308 | 3.23194  | 1.639965 | 0.174239 | 0.413053 | UP   | 827.0044 | 827.0037 |
| 2662 | M488T20  | 24.32584 | 4.604418 | 1.649926 | 0.174256 | 0.413059 | UP   | 488.1913 | 488.1911 |
| 2663 | M431T25_ | 36.41859 | 5.186603 | 1.649489 | 0.174335 | 0.413083 | UP   | 431.289  | 431.2889 |
| 2664 | M268T37  | 1.384787 | -0.46966 | -1.54919 | 0.174335 | 0.413083 | DOWN | 268.3    | 268.2995 |
| 2665 | M228T10_ | 2.467911 | 1.30329  | 1.529008 | 0.174342 | 0.413085 | UP   | 228.2324 | 228.2318 |
| 2666 | M329T28  | 5.88179  | 2.556255 | 1.597514 | 0.174374 | 0.413096 | UP   | 328.5725 | 328.5721 |
| 2667 | M300T29_ | 2.491958 | 1.31728  | 1.490429 | 0.174452 | 0.41312  | UP   | 299.6334 | 299.6331 |
| 2668 | M656T28  | 3.68174  | 1.880388 | 1.572812 | 0.174559 | 0.413154 | UP   | 656.1375 | 656.1371 |
| 2669 | M449T30  | 2.01807  | 1.012976 | 1.492217 | 0.174608 | 0.413169 | UP   | 449.1588 | 449.1556 |
| 2670 | M436T20_ | 13.15347 | -3.71737 | -1.64765 | 0.174656 | 0.413184 | DOWN | 436.2695 | 436.2686 |
| 2671 | M293T29  | 5.053806 | -2.33737 | -1.62577 | 0.174763 | 0.413217 | DOWN | 292.6287 | 292.6284 |
| 2672 | M277T2   | 7.6776   | 2.940655 | 1.646499 | 0.174918 | 0.413266 | UP   | 276.8964 | 276.896  |
| 2673 | M550T31_ | 358.012  | 8.483864 | 1.646466 | 0.175013 | 0.413296 | UP   | 550.0748 | 550.0747 |
| 2674 | M339T9_2 | 1.896013 | 0.922969 | 1.568258 | 0.175123 | 0.41333  | UP   | 339.2523 | 339.2518 |
| 2675 | M396T26  | 1.803088 | -0.85047 | -1.59922 | 0.175126 | 0.413331 | DOWN | 396.1751 | 396.1746 |
| 2676 | M417T18  | 2.491812 | 1.317195 | 1.499597 | 0.175186 | 0.41335  | UP   | 416.9023 | 416.9019 |
| 2677 | M555T27_ | 16.24019 | 4.021497 | 1.644972 | 0.175202 | 0.413355 | UP   | 555.2871 | 555.2866 |
| 2678 | M385T9_1 | 2.27938  | -1.18864 | -1.48957 | 0.175222 | 0.413361 | DOWN | 384.5816 | 384.5814 |

|      |          |          |          |          |          |          |      |          |          |
|------|----------|----------|----------|----------|----------|----------|------|----------|----------|
| 2679 | M705T9_4 | 4.264161 | 2.092262 | 1.586011 | 0.175286 | 0.413381 | UP   | 705.4759 | 705.4748 |
| 2680 | M220T22  | 5.75829  | -2.52564 | -1.63905 | 0.175424 | 0.413424 | DOWN | 220.1992 | 220.1989 |
| 2681 | M341T27  | 51.49372 | 5.686325 | 1.643831 | 0.175513 | 0.413452 | UP   | 341.1401 | 341.1399 |
| 2682 | M722T32  | 3.022153 | 1.595577 | 1.48818  | 0.175611 | 0.413482 | UP   | 722.2062 | 722.2049 |
| 2683 | M291T28_ | 3.132529 | 1.647328 | 1.534582 | 0.175632 | 0.413489 | UP   | 290.6099 | 290.6096 |
| 2684 | M519T11_ | 2.842785 | 1.507305 | 1.544987 | 0.175894 | 0.41357  | UP   | 519.1891 | 519.1879 |
| 2685 | M377T26  | 2.856123 | 1.514058 | 1.506388 | 0.17594  | 0.413584 | UP   | 377.1049 | 377.1045 |
| 2686 | M463T16  | 2.99922  | 1.584587 | 1.487688 | 0.175986 | 0.413598 | UP   | 462.9077 | 462.9075 |
| 2687 | M457T9_6 | 2.530102 | -1.3392  | -1.57569 | 0.176127 | 0.413642 | DOWN | 457.3381 | 457.3379 |
| 2688 | M447T29_ | 2.986646 | 1.578526 | 1.483729 | 0.176199 | 0.413664 | UP   | 446.526  | 446.5257 |
| 2689 | M353T19  | 19.75241 | 4.303956 | 1.640416 | 0.176238 | 0.413676 | UP   | 353.242  | 353.2418 |
| 2690 | M412T26_ | 2.847263 | 1.509576 | 1.492727 | 0.176259 | 0.413682 | UP   | 412.0348 | 412.0347 |
| 2691 | M849T10_ | 4.162646 | 2.057501 | 1.55838  | 0.176296 | 0.413694 | UP   | 849.0179 | 849.0175 |
| 2692 | M445T26_ | 2.802154 | 1.486536 | 1.498543 | 0.176297 | 0.413694 | UP   | 444.9335 | 444.9331 |
| 2693 | M1181T10 | 3.555423 | 1.830021 | 1.541043 | 0.176428 | 0.413734 | UP   | 1180.73  | 1180.729 |
| 2694 | M773T10  | 2.869534 | 1.520816 | 1.544821 | 0.176459 | 0.413744 | UP   | 773.4929 | 773.4909 |
| 2695 | M630T11_ | 14.01845 | 3.809255 | 1.633592 | 0.176496 | 0.413756 | UP   | 630.275  | 630.2748 |
| 2696 | M284T26  | 2.598301 | 1.377569 | 1.489462 | 0.176592 | 0.413785 | UP   | 284.129  | 284.1287 |
| 2697 | M378T29_ | 1.670735 | 0.740482 | 1.571369 | 0.176857 | 0.413866 | UP   | 378.2279 | 378.2277 |
| 2698 | M524T34  | 2.737244 | 1.452724 | 1.548147 | 0.176926 | 0.413888 | UP   | 524.4463 | 524.4457 |
| 2699 | M493T31  | 1.593147 | -0.67188 | -1.49333 | 0.177003 | 0.413911 | DOWN | 493.1458 | 493.1447 |
| 2700 | M364T24  | 12.63463 | 3.659311 | 1.636538 | 0.177022 | 0.413917 | UP   | 364.2386 | 364.2385 |
| 2701 | M658T31  | 2.725408 | 1.446472 | 1.481297 | 0.177242 | 0.413984 | UP   | 658.2398 | 658.2395 |
| 2702 | M279T28_ | 3.229481 | 1.691302 | 1.538803 | 0.177582 | 0.414088 | UP   | 278.61   | 278.6096 |
| 2703 | M324T19  | 1.474628 | -0.56035 | -1.50244 | 0.177594 | 0.414092 | DOWN | 324.2252 | 324.225  |
| 2704 | M310T15  | 932.6741 | 9.865229 | 1.633685 | 0.177663 | 0.414113 | UP   | 310.1918 | 310.1916 |
| 2705 | M680T10_ | 2.377621 | 1.249519 | 1.491731 | 0.177666 | 0.414113 | UP   | 680.0143 | 680.0128 |
| 2706 | M395T25  | 2.818448 | 1.494901 | 1.484297 | 0.177724 | 0.414131 | UP   | 395.1156 | 395.1153 |
| 2707 | M673T22  | 13.98473 | -3.80578 | -1.6308  | 0.17777  | 0.414145 | DOWN | 673.2873 | 673.2854 |
| 2708 | M681T9_2 | 31.73563 | -4.98803 | -1.6326  | 0.177775 | 0.414147 | DOWN | 681.0695 | 681.0689 |
| 2709 | M709T30_ | 1.226887 | 0.295003 | 1.489022 | 0.177833 | 0.414164 | UP   | 709.4934 | 709.4921 |
| 2710 | M559T44  | 1.193835 | 0.255604 | 1.477944 | 0.177846 | 0.414168 | UP   | 558.9177 | 558.9168 |
| 2711 | M617T30  | 3.524605 | 1.817461 | 1.503436 | 0.17788  | 0.414178 | UP   | 617.1118 | 617.1109 |
| 2712 | M440T28_ | 2.371418 | 1.24575  | 1.604335 | 0.177885 | 0.41418  | UP   | 440.3312 | 440.3304 |
| 2713 | M513T23  | 2.469589 | 1.304271 | 1.478299 | 0.177987 | 0.414211 | UP   | 513.1413 | 513.1412 |
| 2714 | M750T12  | 2.135487 | 1.094565 | 1.499545 | 0.178014 | 0.414219 | UP   | 749.5825 | 749.5808 |
| 2715 | M363T10  | 3.911007 | -1.96754 | -1.60003 | 0.178018 | 0.41422  | DOWN | 362.7437 | 362.7431 |
| 2716 | M310T22  | 3.457082 | 1.789555 | 1.561976 | 0.178042 | 0.414228 | UP   | 310.074  | 310.0738 |
| 2717 | M266T13_ | 87.11251 | 6.444808 | 1.631667 | 0.178082 | 0.41424  | UP   | 266.0927 | 266.0925 |
| 2718 | M433T23_ | 1.812965 | 0.858351 | 1.478717 | 0.178105 | 0.414247 | UP   | 433.2586 | 433.255  |
| 2719 | M500T31  | 1.589721 | -0.66877 | -1.49007 | 0.178121 | 0.414252 | DOWN | 499.5644 | 499.5632 |
| 2720 | M478T21  | 2.849932 | 1.510927 | 1.607628 | 0.178133 | 0.414255 | UP   | 478.2703 | 478.27   |
| 2721 | M537T22  | 125.7477 | 6.974389 | 1.630589 | 0.178305 | 0.414307 | UP   | 537.3522 | 537.3517 |
| 2722 | M349T28_ | 4.396437 | 2.136335 | 1.602652 | 0.17842  | 0.414342 | UP   | 349.225  | 349.2247 |
| 2723 | M199T26  | 1.449667 | -0.53572 | -1.56106 | 0.178426 | 0.414344 | DOWN | 199.1693 | 199.169  |
| 2724 | M267T33  | 1.236205 | -0.30592 | -1.47531 | 0.178472 | 0.414358 | DOWN | 267.2109 | 267.2108 |
| 2725 | M1141T11 | 5.431621 | 2.441383 | 1.61753  | 0.178476 | 0.414359 | UP   | 1140.55  | 1140.548 |

|      |          |          |          |          |          |          |      |          |          |
|------|----------|----------|----------|----------|----------|----------|------|----------|----------|
| 2726 | M212T9_1 | 1344.631 | 10.393   | 1.629498 | 0.17854  | 0.414378 | UP   | 212.1488 | 212.1422 |
| 2727 | M281T31_ | 1.888575 | 0.917298 | 1.491289 | 0.178585 | 0.414392 | UP   | 281.1658 | 281.1655 |
| 2728 | M265T25_ | 10.81331 | 3.434736 | 1.628307 | 0.178721 | 0.414433 | UP   | 265.1087 | 265.1084 |
| 2729 | M320T24_ | 24.29149 | 4.602379 | 1.628372 | 0.178767 | 0.414447 | UP   | 320.176  | 320.1758 |
| 2730 | M862T29  | 2.852384 | 1.512168 | 1.47505  | 0.178804 | 0.414458 | UP   | 862.1265 | 862.126  |
| 2731 | M589T26_ | 6.32238  | 2.660468 | 1.621472 | 0.178831 | 0.414466 | UP   | 589.2603 | 589.2601 |
| 2732 | M463T37  | 1.535497 | -0.61871 | -1.52689 | 0.178887 | 0.414483 | DOWN | 463.1306 | 463.1299 |
| 2733 | M614T35_ | 1.263034 | 0.336893 | 1.489138 | 0.178941 | 0.414499 | UP   | 614.4481 | 614.4467 |
| 2734 | M405T25  | 3.080671 | 1.623245 | 1.511176 | 0.17895  | 0.414502 | UP   | 405.121  | 405.1205 |
| 2735 | M324T38  | 2.235484 | 1.160587 | 1.505869 | 0.179115 | 0.414551 | UP   | 324.1622 | 324.162  |
| 2736 | M514T10_ | 4.225801 | 2.079225 | 1.59514  | 0.179199 | 0.414576 | UP   | 514.1978 | 514.1972 |
| 2737 | M588T28  | 10.67434 | -3.41608 | -1.62316 | 0.179301 | 0.414607 | DOWN | 588.2064 | 588.206  |
| 2738 | M397T34  | 3.312382 | 1.727869 | 1.565508 | 0.179407 | 0.414639 | UP   | 397.3035 | 397.2953 |
| 2739 | M461T41  | 25.72654 | 4.685186 | 1.624949 | 0.179418 | 0.414642 | UP   | 461.3635 | 461.3634 |
| 2740 | M593T26  | 2.572941 | 1.363418 | 1.559574 | 0.179426 | 0.414644 | UP   | 592.8641 | 592.8637 |
| 2741 | M563T20  | 74.39785 | 6.217189 | 1.625092 | 0.179449 | 0.414651 | UP   | 563.2389 | 563.2385 |
| 2742 | M757T43_ | 1.375758 | 0.460227 | 1.478779 | 0.179512 | 0.41467  | UP   | 757.0364 | 757.035  |
| 2743 | M296T30  | 2.557045 | 1.354477 | 1.477779 | 0.179598 | 0.414696 | UP   | 296.1466 | 296.1464 |
| 2744 | M586T32_ | 5.296999 | -2.40518 | -1.61251 | 0.179746 | 0.41474  | DOWN | 586.2655 | 586.265  |
| 2745 | M434T26_ | 3.091318 | -1.62822 | -1.60715 | 0.179755 | 0.414743 | DOWN | 434.3267 | 434.3262 |
| 2746 | M492T44_ | 1.216119 | 0.282284 | 1.49283  | 0.179992 | 0.414813 | UP   | 491.8754 | 491.8747 |
| 2747 | M438T11_ | 127.4103 | 6.993338 | 1.622239 | 0.180068 | 0.414836 | UP   | 438.2395 | 438.2389 |
| 2748 | M775T42  | 1.856795 | 0.892814 | 1.515816 | 0.18019  | 0.414872 | UP   | 774.5945 | 774.5941 |
| 2749 | M568T19  | 9.804642 | 3.293465 | 1.603369 | 0.180247 | 0.414889 | UP   | 568.0138 | 568.0136 |
| 2750 | M794T9_3 | 53.85056 | -5.75089 | -1.62017 | 0.180496 | 0.414963 | DOWN | 794.413  | 794.4126 |
| 2751 | M355T32_ | 2.609537 | 1.383794 | 1.537918 | 0.180575 | 0.414986 | UP   | 355.2039 | 355.2038 |
| 2752 | M405T33  | 3.393109 | 1.762608 | 1.606897 | 0.180612 | 0.414997 | UP   | 405.1953 | 405.1948 |
| 2753 | M358T23  | 3.997785 | 1.999201 | 1.530586 | 0.180644 | 0.415006 | UP   | 357.8963 | 357.8962 |
| 2754 | M532T25  | 8.216216 | 3.038474 | 1.617994 | 0.180674 | 0.415015 | UP   | 532.3174 | 532.3174 |
| 2755 | M227T15_ | 2.204463 | 1.140428 | 1.558086 | 0.180684 | 0.415018 | UP   | 227.0639 | 227.0637 |
| 2756 | M359T33  | 2.321508 | 1.215062 | 1.590209 | 0.18077  | 0.415044 | UP   | 359.1896 | 359.1896 |
| 2757 | M521T12  | 1.951212 | 0.96437  | 1.468721 | 0.180806 | 0.415054 | UP   | 521.4063 | 521.4055 |
| 2758 | M199T23  | 2.435643 | 1.284302 | 1.492377 | 0.180927 | 0.41509  | UP   | 198.9579 | 198.9576 |
| 2759 | M435T31_ | 2.715767 | 1.44136  | 1.501333 | 0.180974 | 0.415104 | UP   | 434.5255 | 434.5254 |
| 2760 | M794T11  | 2.16064  | 1.111459 | 1.492242 | 0.181009 | 0.415114 | UP   | 793.6008 | 793.5977 |
| 2761 | M361T16  | 35.96408 | 5.168485 | 1.616471 | 0.181158 | 0.415158 | UP   | 361.0773 | 361.0771 |
| 2762 | M313T30_ | 2.587245 | 1.371417 | 1.57506  | 0.181202 | 0.415171 | UP   | 313.1568 | 313.1549 |
| 2763 | M347T21_ | 2.355569 | 1.236076 | 1.478208 | 0.181206 | 0.415172 | UP   | 347.1358 | 347.132  |
| 2764 | M497T31_ | 1.529438 | -0.613   | -1.46774 | 0.181209 | 0.415173 | DOWN | 497.3429 | 497.3418 |
| 2765 | M499T12_ | 42.29155 | 5.402298 | 1.616614 | 0.181238 | 0.415182 | UP   | 499.2999 | 499.2995 |
| 2766 | M286T16_ | 2.900565 | 1.536334 | 1.494025 | 0.181261 | 0.415188 | UP   | 286.0739 | 286.0737 |
| 2767 | M561T27  | 7.45237  | -2.8977  | -1.60986 | 0.18134  | 0.415211 | DOWN | 561.0157 | 561.0154 |
| 2768 | M271T9   | 3.392031 | 1.762149 | 1.50738  | 0.181343 | 0.415212 | UP   | 271.1515 | 271.1498 |
| 2769 | M346T20  | 70.94622 | 6.148654 | 1.615845 | 0.181419 | 0.415235 | UP   | 346.1205 | 346.1204 |
| 2770 | M393T31  | 2.451384 | 1.293597 | 1.466676 | 0.181488 | 0.415255 | UP   | 393.0997 | 393.0996 |
| 2771 | M320T23_ | 2.553477 | -1.35246 | -1.57713 | 0.181569 | 0.415279 | DOWN | 320.2184 | 320.218  |
| 2772 | M279T31_ | 7.952881 | -2.99148 | -1.58522 | 0.181664 | 0.415307 | DOWN | 279.2216 | 279.2149 |

|      |          |          |          |          |          |          |      |          |          |
|------|----------|----------|----------|----------|----------|----------|------|----------|----------|
| 2773 | M293T31_ | 2.688243 | 1.426663 | 1.46421  | 0.181667 | 0.415307 | UP   | 292.6072 | 292.607  |
| 2774 | M243T32  | 2.347766 | -1.23129 | -1.53759 | 0.181705 | 0.415318 | DOWN | 243.138  | 243.1379 |
| 2775 | M629T33  | 32.23293 | 5.010463 | 1.612419 | 0.182099 | 0.415434 | UP   | 628.9997 | 628.999  |
| 2776 | M442T23  | 2.095835 | 1.067525 | 1.469514 | 0.182123 | 0.415441 | UP   | 442.1713 | 442.171  |
| 2777 | M706T9_2 | 4.327375 | 2.113492 | 1.555473 | 0.182297 | 0.415491 | UP   | 705.977  | 705.9653 |
| 2778 | M377T13_ | 43.74949 | 5.451194 | 1.611069 | 0.182343 | 0.415505 | UP   | 377.0893 | 377.0891 |
| 2779 | M473T14_ | 57.29093 | 5.840235 | 1.611121 | 0.18237  | 0.415512 | UP   | 473.2085 | 473.2083 |
| 2780 | M455T26  | 2.803189 | 1.487069 | 1.469309 | 0.182393 | 0.415519 | UP   | 455.0567 | 455.0558 |
| 2781 | M379T44_ | 1.407339 | 0.49297  | 1.459926 | 0.182466 | 0.41554  | UP   | 379.212  | 379.2119 |
| 2782 | M380T25_ | 4.348572 | 2.120542 | 1.574172 | 0.182722 | 0.415615 | UP   | 380.2795 | 380.27   |
| 2783 | M454T19  | 4.375785 | -2.12954 | -1.60072 | 0.182736 | 0.415619 | DOWN | 454.3168 | 454.3164 |
| 2784 | M521T39  | 2.876373 | 1.524251 | 1.531161 | 0.18277  | 0.415629 | UP   | 521.3841 | 521.3838 |
| 2785 | M534T25  | 10.38669 | 3.376664 | 1.609074 | 0.182818 | 0.415642 | UP   | 534.3331 | 534.333  |
| 2786 | M794T27  | 6.856538 | 2.77748  | 1.606388 | 0.183032 | 0.415704 | UP   | 794.4598 | 794.4597 |
| 2787 | M491T43  | 39.80694 | 5.314948 | 1.607627 | 0.183135 | 0.415734 | UP   | 490.886  | 490.886  |
| 2788 | M238T12  | 2.40507  | 1.266079 | 1.458305 | 0.183187 | 0.415749 | UP   | 238.228  | 238.2274 |
| 2789 | M486T26_ | 2.790203 | 1.48037  | 1.465941 | 0.183306 | 0.415783 | UP   | 485.9601 | 485.9597 |
| 2790 | M659T31_ | 2.932291 | 1.552028 | 1.458178 | 0.183308 | 0.415784 | UP   | 659.2352 | 659.2345 |
| 2791 | M573T43  | 1.309061 | -0.38853 | -1.47991 | 0.183419 | 0.415816 | DOWN | 573.3252 | 573.3245 |
| 2792 | M326T11  | 8.667634 | 3.115638 | 1.595181 | 0.183426 | 0.415818 | UP   | 326.0937 | 326.0934 |
| 2793 | M562T23_ | 220.0885 | 7.78194  | 1.606291 | 0.183482 | 0.415834 | UP   | 562.2354 | 562.2353 |
| 2794 | M180T17  | 3.190052 | 1.67358  | 1.492869 | 0.183568 | 0.415859 | UP   | 180.0382 | 180.0381 |
| 2795 | M1388T9  | 4.037353 | 2.01341  | 1.533776 | 0.183572 | 0.41586  | UP   | 1387.987 | 1387.986 |
| 2796 | M220T11  | 6.477688 | 2.695479 | 1.588689 | 0.183619 | 0.415873 | UP   | 220.0311 | 220.0309 |
| 2797 | M348T28_ | 7.751758 | 2.954523 | 1.605384 | 0.183654 | 0.415884 | UP   | 348.2073 | 348.2072 |
| 2798 | M309T10_ | 3.096222 | 1.630509 | 1.514177 | 0.183883 | 0.415949 | UP   | 309.2274 | 309.2265 |
| 2799 | M572T11  | 9.984088 | 3.319631 | 1.589661 | 0.184195 | 0.416038 | UP   | 572.1577 | 572.1557 |
| 2800 | M289T32_ | 2.633868 | 1.397183 | 1.459643 | 0.184231 | 0.416049 | UP   | 288.6412 | 288.6407 |
| 2801 | M933T9_2 | 4.389985 | 2.134216 | 1.552163 | 0.184255 | 0.416056 | UP   | 933.1447 | 933.1426 |
| 2802 | M381T17_ | 2.396776 | 1.261095 | 1.473534 | 0.184296 | 0.416067 | UP   | 381.2694 | 381.2693 |
| 2803 | M367T2   | 1967.728 | 10.94232 | 1.602471 | 0.184312 | 0.416072 | UP   | 366.7978 | 366.7975 |
| 2804 | M184T20  | 2.04829  | 1.03442  | 1.455413 | 0.184467 | 0.416116 | UP   | 184.0057 | 184.0056 |
| 2805 | M330T12  | 662.8173 | 9.372467 | 1.60172  | 0.184475 | 0.416118 | UP   | 330.1717 | 330.1715 |
| 2806 | M748T12  | 2.01102  | 1.007928 | 1.454505 | 0.184561 | 0.416143 | UP   | 747.5755 | 747.5743 |
| 2807 | M490T43_ | 18.83601 | 4.235422 | 1.600464 | 0.184727 | 0.41619  | UP   | 490.3843 | 490.3842 |
| 2808 | M539T42_ | 1.236138 | 0.30584  | 1.550054 | 0.184741 | 0.416194 | UP   | 539.0495 | 539.0484 |
| 2809 | M454T9_6 | 17.40734 | 4.121624 | 1.596595 | 0.184821 | 0.416217 | UP   | 454.2673 | 454.2672 |
| 2810 | M304T32  | 8.113341 | -3.0203  | -1.59717 | 0.184912 | 0.416243 | DOWN | 304.1249 | 304.1245 |
| 2811 | M423T38  | 1.686459 | 0.753997 | 1.452572 | 0.185046 | 0.41628  | UP   | 423.4026 | 423.4018 |
| 2812 | M382T15  | 3.023694 | 1.596312 | 1.541793 | 0.185072 | 0.416288 | UP   | 381.7712 | 381.7707 |
| 2813 | M478T19_ | 1.7992   | 0.847355 | 1.4516   | 0.185261 | 0.416341 | UP   | 478.4007 | 478.3998 |
| 2814 | M385T31_ | 1.85701  | 0.892982 | 1.519723 | 0.185362 | 0.41637  | UP   | 385.2143 | 385.2141 |
| 2815 | M517T9   | 3.760001 | -1.91073 | -1.58051 | 0.185537 | 0.416419 | DOWN | 517.2525 | 517.2525 |
| 2816 | M488T26  | 3.877259 | 1.955037 | 1.513366 | 0.185579 | 0.416431 | UP   | 488.2464 | 488.2457 |
| 2817 | M458T30_ | 1.5827   | -0.66239 | -1.45806 | 0.185605 | 0.416439 | DOWN | 458.324  | 458.3238 |
| 2818 | M458T21_ | 24.51483 | 4.615583 | 1.595828 | 0.18571  | 0.416468 | UP   | 458.2441 | 458.244  |
| 2819 | M357T36  | 1.462071 | -0.54801 | -1.51198 | 0.185729 | 0.416473 | DOWN | 357.2428 | 357.2427 |

|      |          |          |          |          |          |          |      |          |          |
|------|----------|----------|----------|----------|----------|----------|------|----------|----------|
| 2820 | M348T28_ | 4.219894 | 2.077207 | 1.590716 | 0.185737 | 0.416476 | UP   | 348.1552 | 348.1546 |
| 2821 | M598T9_2 | 3.803687 | 1.927399 | 1.577344 | 0.185806 | 0.416495 | UP   | 598.4176 | 598.4161 |
| 2822 | M165T26_ | 1.210997 | -0.2762  | -1.50566 | 0.185843 | 0.416506 | DOWN | 165.0546 | 165.0545 |
| 2823 | M780T10_ | 6.350726 | 2.666922 | 1.567788 | 0.185879 | 0.416516 | UP   | 780.4031 | 780.4024 |
| 2824 | M491T32  | 2.654257 | 1.408308 | 1.489143 | 0.185968 | 0.416541 | UP   | 490.9752 | 490.975  |
| 2825 | M322T14_ | 148.4837 | 7.214161 | 1.59456  | 0.186035 | 0.41656  | UP   | 322.1916 | 322.1914 |
| 2826 | M622T10  | 2.92597  | 1.548915 | 1.521222 | 0.186095 | 0.416576 | UP   | 621.5153 | 621.5135 |
| 2827 | M335T16_ | 4.646295 | 2.216081 | 1.556699 | 0.186134 | 0.416587 | UP   | 335.2777 | 335.2775 |
| 2828 | M342T14  | 966.6656 | 9.916873 | 1.593809 | 0.186202 | 0.416606 | UP   | 342.1717 | 342.1714 |
| 2829 | M758T26  | 10.23243 | 3.355077 | 1.592149 | 0.186282 | 0.416629 | UP   | 758.3503 | 758.3498 |
| 2830 | M583T42_ | 1.484324 | 0.569806 | 1.454266 | 0.186313 | 0.416638 | UP   | 583.4106 | 583.4093 |
| 2831 | M312T26_ | 2.711497 | 1.43909  | 1.449553 | 0.186321 | 0.41664  | UP   | 311.5801 | 311.5793 |
| 2832 | M794T9_2 | 314.3702 | -8.29632 | -1.59304 | 0.18637  | 0.416653 | DOWN | 794.2468 | 794.246  |
| 2833 | M1726T9_ | 7.11203  | 2.830261 | 1.570962 | 0.186402 | 0.416662 | UP   | 1726.241 | 1726.239 |
| 2834 | M266T15_ | 1.545207 | 0.6278   | 1.465104 | 0.186537 | 0.4167   | UP   | 266.2118 | 266.2117 |
| 2835 | M332T27_ | 1.592213 | 0.671034 | 1.532027 | 0.186598 | 0.416717 | UP   | 332.2304 | 332.2304 |
| 2836 | M617T14  | 2.049863 | 1.035528 | 1.451132 | 0.186747 | 0.416759 | UP   | 617.4643 | 617.463  |
| 2837 | M570T37  | 4.038928 | 2.013973 | 1.570698 | 0.186779 | 0.416768 | UP   | 570.4578 | 570.4572 |
| 2838 | M482T10  | 8.173075 | 3.030879 | 1.587734 | 0.186897 | 0.416801 | UP   | 482.1717 | 482.1708 |
| 2839 | M500T20  | 195.4267 | 7.610483 | 1.589644 | 0.187117 | 0.416862 | UP   | 500.2276 | 500.2275 |
| 2840 | M715T41  | 1.736977 | 0.796578 | 1.496375 | 0.187276 | 0.416906 | UP   | 715.3202 | 715.3183 |
| 2841 | M588T29  | 3.160242 | -1.66004 | -1.51107 | 0.187297 | 0.416912 | DOWN | 588.3034 | 588.2936 |
| 2842 | M328T10  | 2.164237 | 1.113858 | 1.455933 | 0.187322 | 0.416919 | UP   | 328.2963 | 328.2951 |
| 2843 | M289T29_ | 2.520544 | 1.333735 | 1.441392 | 0.187448 | 0.416954 | UP   | 289.1387 | 289.1385 |
| 2844 | M519T26  | 6.937616 | 2.79444  | 1.581086 | 0.18764  | 0.417007 | UP   | 519.3414 | 519.3413 |
| 2845 | M459T33_ | 1.603388 | 0.681123 | 1.441051 | 0.187715 | 0.417028 | UP   | 458.8234 | 458.823  |
| 2846 | M656T32  | 15.69456 | -3.97219 | -1.58582 | 0.187725 | 0.41703  | DOWN | 656.2521 | 656.2509 |
| 2847 | M477T20  | 2.293984 | 1.197856 | 1.497144 | 0.18782  | 0.417056 | UP   | 477.3412 | 477.3411 |
| 2848 | M552T33  | 64.70831 | 6.015879 | 1.585795 | 0.187965 | 0.417097 | UP   | 552.0902 | 552.0898 |
| 2849 | M562T20  | 280.4218 | 8.131454 | 1.585516 | 0.18803  | 0.417114 | UP   | 562.2354 | 562.2351 |
| 2850 | M840T32  | 3.215199 | 1.684908 | 1.443223 | 0.188046 | 0.417119 | UP   | 840.1421 | 840.1419 |
| 2851 | M624T43_ | 1.168112 | 0.224178 | 1.440038 | 0.18821  | 0.417164 | UP   | 623.9544 | 623.9535 |
| 2852 | M636T10  | 2.826331 | 1.498931 | 1.494717 | 0.188301 | 0.417189 | UP   | 636.4013 | 636.3984 |
| 2853 | M455T20_ | 19.51523 | 4.286529 | 1.583674 | 0.188373 | 0.417209 | UP   | 455.1982 | 455.1979 |
| 2854 | M747T41  | 4.834439 | -2.27335 | -1.56747 | 0.188647 | 0.417284 | DOWN | 747.2216 | 747.2199 |
| 2855 | M519T32_ | 2.560075 | 1.356186 | 1.463834 | 0.188727 | 0.417306 | UP   | 518.9702 | 518.9699 |
| 2856 | M769T43  | 1.39342  | 0.47863  | 1.51947  | 0.188811 | 0.417329 | UP   | 769.032  | 769.0308 |
| 2857 | M634T39  | 7.835464 | 2.970019 | 1.581006 | 0.188813 | 0.41733  | UP   | 634.4373 | 634.4371 |
| 2858 | M329T36  | 2.284705 | 1.192008 | 1.537727 | 0.188849 | 0.417339 | UP   | 329.2089 | 329.2088 |
| 2859 | M514T19  | 7.664689 | 2.938227 | 1.580805 | 0.188909 | 0.417356 | UP   | 514.2703 | 514.27   |
| 2860 | M167T32  | 1.583994 | -0.66357 | -1.43597 | 0.188951 | 0.417367 | DOWN | 166.9858 | 166.9858 |
| 2861 | M415T26_ | 2.834176 | 1.502929 | 1.439902 | 0.188981 | 0.417375 | UP   | 415.0336 | 415.0334 |
| 2862 | M658T20  | 3.890391 | -1.95992 | -1.56133 | 0.189001 | 0.417381 | DOWN | 658.1664 | 658.1653 |
| 2863 | M242T24  | 6.929042 | -2.79266 | -1.57023 | 0.189044 | 0.417393 | DOWN | 242.1832 | 242.183  |
| 2864 | M352T14  | 2.598336 | 1.377588 | 1.456727 | 0.189058 | 0.417396 | UP   | 352.285  | 352.2847 |
| 2865 | M1038T10 | 3.551653 | 1.828491 | 1.556798 | 0.189098 | 0.417407 | UP   | 1037.742 | 1037.738 |
| 2866 | M471T29_ | 2.966274 | 1.568652 | 1.435357 | 0.189105 | 0.417409 | UP   | 471.0276 | 471.0272 |

|      |          |          |          |          |          |          |      |          |          |
|------|----------|----------|----------|----------|----------|----------|------|----------|----------|
| 2867 | M598T26  | 11.18422 | 3.483393 | 1.575234 | 0.189204 | 0.417436 | UP   | 598.4534 | 598.4522 |
| 2868 | M909T10  | 5.267452 | 2.397105 | 1.543487 | 0.189216 | 0.41744  | UP   | 908.6892 | 908.6878 |
| 2869 | M338T17_ | 1.553201 | -0.63524 | -1.44137 | 0.189261 | 0.417452 | DOWN | 338.0337 | 338.0333 |
| 2870 | M819T42  | 1.949528 | 0.963125 | 1.505789 | 0.189278 | 0.417457 | UP   | 818.6211 | 818.6211 |
| 2871 | M172T28  | 2.669114 | 1.416361 | 1.435478 | 0.189316 | 0.417467 | UP   | 171.5899 | 171.5899 |
| 2872 | M901T11  | 3.860348 | 1.948731 | 1.504567 | 0.189417 | 0.417494 | UP   | 900.5584 | 900.5575 |
| 2873 | M346T18  | 2.566199 | 1.359633 | 1.472808 | 0.189577 | 0.417538 | UP   | 345.9762 | 345.976  |
| 2874 | M331T23  | 2.720702 | 1.443979 | 1.522497 | 0.189642 | 0.417555 | UP   | 331.1307 | 331.1306 |
| 2875 | M632T22  | 8.012279 | -3.00221 | -1.5731  | 0.189795 | 0.417597 | DOWN | 632.2606 | 632.26   |
| 2876 | M261T6   | 2.3838   | -1.25326 | -1.53075 | 0.18988  | 0.41762  | DOWN | 261.0878 | 261.0876 |
| 2877 | M259T23_ | 3.064401 | 1.615605 | 1.507592 | 0.189918 | 0.41763  | UP   | 258.9747 | 258.9742 |
| 2878 | M395T38  | 6.507434 | 2.702089 | 1.573894 | 0.189995 | 0.417651 | UP   | 395.1641 | 395.1633 |
| 2879 | M288T11_ | 143.7424 | 7.167342 | 1.576554 | 0.190025 | 0.417659 | UP   | 288.15   | 288.1495 |
| 2880 | M705T12  | 3.057583 | 1.612391 | 1.479132 | 0.190068 | 0.417671 | UP   | 704.5696 | 704.5684 |
| 2881 | M707T10_ | 4.493464 | 2.167828 | 1.517165 | 0.190201 | 0.417707 | UP   | 707.4749 | 707.472  |
| 2882 | M922T44_ | 1.969133 | 0.977561 | 1.545954 | 0.190287 | 0.41773  | UP   | 921.5986 | 921.5976 |
| 2883 | M373T26  | 2.783753 | 1.477031 | 1.438191 | 0.19031  | 0.417736 | UP   | 373.0035 | 373.0034 |
| 2884 | M446T21_ | 6.121732 | 2.61394  | 1.574762 | 0.190392 | 0.417758 | UP   | 446.2905 | 446.2901 |
| 2885 | M390T21  | 4.438575 | -2.1501  | -1.57332 | 0.190432 | 0.417769 | DOWN | 390.1664 | 390.1655 |
| 2886 | M556T32  | 2.28233  | -1.19051 | -1.52374 | 0.19048  | 0.417782 | DOWN | 556.3041 | 556.3037 |
| 2887 | M260T2   | 519.9092 | 9.022116 | 1.574008 | 0.190599 | 0.417814 | UP   | 259.8937 | 259.8936 |
| 2888 | M406T32  | 1.57887  | -0.65889 | -1.511   | 0.190617 | 0.417819 | DOWN | 406.1386 | 406.1378 |
| 2889 | M260T9_1 | 3.066983 | -1.61682 | -1.51073 | 0.190864 | 0.417885 | DOWN | 259.6318 | 259.6314 |
| 2890 | M804T10  | 5.686809 | 2.507619 | 1.540712 | 0.190916 | 0.417899 | UP   | 804.4899 | 804.4892 |
| 2891 | M307T19_ | 4.571043 | 2.192523 | 1.566081 | 0.190984 | 0.417917 | UP   | 307.227  | 307.227  |
| 2892 | M678T10_ | 7.604848 | 2.926919 | 1.569574 | 0.19101  | 0.417925 | UP   | 678.0413 | 678.034  |
| 2893 | M416T24_ | 8.039316 | -3.00707 | -1.56968 | 0.191026 | 0.417929 | DOWN | 416.1408 | 416.1402 |
| 2894 | M457T12  | 2.199484 | 1.137165 | 1.428169 | 0.191146 | 0.417961 | UP   | 457.362  | 457.3612 |
| 2895 | M907T30  | 2.159537 | 1.110722 | 1.430664 | 0.191147 | 0.417961 | UP   | 906.674  | 906.6728 |
| 2896 | M456T12_ | 2.093965 | 1.066238 | 1.42777  | 0.191212 | 0.417978 | UP   | 456.3586 | 456.3578 |
| 2897 | M291T16  | 2.724031 | -1.44574 | -1.4914  | 0.191252 | 0.417989 | DOWN | 291.0857 | 291.0856 |
| 2898 | M512T38  | 3.749702 | 1.906776 | 1.470877 | 0.191344 | 0.418014 | UP   | 512.1224 | 512.1221 |
| 2899 | M489T9_4 | 2.378811 | -1.25024 | -1.51689 | 0.191461 | 0.418045 | DOWN | 489.3041 | 489.3041 |
| 2900 | M489T13  | 29.79828 | 4.897157 | 1.568653 | 0.191499 | 0.418055 | UP   | 489.2036 | 489.2033 |
| 2901 | M287T29  | 2.765691 | 1.46764  | 1.427668 | 0.191595 | 0.418081 | UP   | 286.6358 | 286.6356 |
| 2902 | M534T23  | 24.16842 | 4.595051 | 1.569286 | 0.191633 | 0.418091 | UP   | 534.3328 | 534.3328 |
| 2903 | M340T32_ | 1.608314 | -0.68555 | -1.53424 | 0.191647 | 0.418095 | DOWN | 340.1613 | 340.1611 |
| 2904 | M351T12  | 2.458242 | 1.297627 | 1.453685 | 0.191682 | 0.418104 | UP   | 351.2381 | 351.2377 |
| 2905 | M241T10_ | 2.193098 | 1.13297  | 1.452065 | 0.191688 | 0.418106 | UP   | 241.1911 | 241.1905 |
| 2906 | M599T9   | 2.420496 | 1.275302 | 1.518719 | 0.191752 | 0.418123 | UP   | 599.403  | 599.4008 |
| 2907 | M411T33  | 87.35366 | 6.448796 | 1.568396 | 0.191863 | 0.418152 | UP   | 411.1388 | 411.1387 |
| 2908 | M509T11  | 6.560626 | 2.713834 | 1.545359 | 0.191869 | 0.418154 | UP   | 509.2576 | 509.2574 |
| 2909 | M403T44_ | 4.272632 | -2.09513 | -1.5597  | 0.191938 | 0.418172 | DOWN | 403.3417 | 403.3412 |
| 2910 | M325T4   | 380.8576 | 8.573108 | 1.566836 | 0.192218 | 0.418247 | UP   | 324.8766 | 324.8766 |
| 2911 | M485T9_1 | 2.674345 | -1.41919 | -1.46518 | 0.192222 | 0.418247 | DOWN | 484.7878 | 484.7874 |
| 2912 | M316T34  | 1.955427 | 0.967484 | 1.546459 | 0.192229 | 0.41825  | UP   | 316.1602 | 316.1602 |
| 2913 | M185T23  | 1.513093 | -0.5975  | -1.47472 | 0.192303 | 0.418269 | DOWN | 185.1285 | 185.1285 |

|      |          |          |          |          |          |          |      |          |          |
|------|----------|----------|----------|----------|----------|----------|------|----------|----------|
| 2914 | M453T19_ | 2.497221 | 1.320323 | 1.454911 | 0.192324 | 0.418275 | UP   | 453.0552 | 453.0547 |
| 2915 | M429T19  | 26.69911 | 4.73872  | 1.565969 | 0.192364 | 0.418285 | UP   | 429.1206 | 429.1204 |
| 2916 | M747T37  | 3.470451 | 1.795123 | 1.539568 | 0.192372 | 0.418287 | UP   | 746.5633 | 746.5629 |
| 2917 | M400T30_ | 1.171598 | 0.228478 | 1.423059 | 0.192531 | 0.418329 | UP   | 400.3058 | 400.3024 |
| 2918 | M847T10  | 3.495644 | 1.805558 | 1.502316 | 0.192696 | 0.418373 | UP   | 846.6813 | 846.6795 |
| 2919 | M441T24  | 11.13859 | 3.477495 | 1.563171 | 0.192949 | 0.41844  | UP   | 441.1823 | 441.1818 |
| 2920 | M422T12  | 202.7328 | 7.663436 | 1.562907 | 0.19311  | 0.418482 | UP   | 422.2441 | 422.2439 |
| 2921 | M386T26  | 2.683024 | 1.42386  | 1.436006 | 0.193172 | 0.418498 | UP   | 386.0354 | 386.0352 |
| 2922 | M709T10_ | 5.633845 | 2.49412  | 1.531863 | 0.193176 | 0.418499 | UP   | 708.972  | 708.9704 |
| 2923 | M518T26  | 5.800205 | 2.536104 | 1.552871 | 0.19319  | 0.418503 | UP   | 518.338  | 518.3377 |
| 2924 | M453T26  | 2.802563 | 1.486747 | 1.425711 | 0.193231 | 0.418514 | UP   | 453.0615 | 453.061  |
| 2925 | M612T25  | 13.02561 | 3.703279 | 1.561733 | 0.193268 | 0.418524 | UP   | 612.3925 | 612.3924 |
| 2926 | M543T30  | 3.841296 | 1.941593 | 1.471261 | 0.193291 | 0.41853  | UP   | 543.0263 | 543.0261 |
| 2927 | M355T13  | 178.387  | 7.478867 | 1.561988 | 0.19332  | 0.418537 | UP   | 355.1668 | 355.1667 |
| 2928 | M654T32  | 9.638807 | -3.26885 | -1.5541  | 0.193348 | 0.418544 | DOWN | 654.253  | 654.2526 |
| 2929 | M836T34  | 2.673501 | 1.41873  | 1.540054 | 0.193362 | 0.418548 | UP   | 835.5833 | 835.582  |
| 2930 | M356T32_ | 2.235625 | 1.160678 | 1.440823 | 0.193415 | 0.418562 | UP   | 356.1887 | 356.1885 |
| 2931 | M460T21  | 2.481106 | 1.310983 | 1.53065  | 0.193598 | 0.41861  | UP   | 460.2695 | 460.2686 |
| 2932 | M507T33  | 1.901257 | 0.926953 | 1.489661 | 0.193603 | 0.418611 | UP   | 507.3292 | 507.3292 |
| 2933 | M339T29_ | 2.531166 | 1.339802 | 1.42711  | 0.193647 | 0.418623 | UP   | 338.5958 | 338.5956 |
| 2934 | M534T24_ | 13.79975 | 3.78657  | 1.560327 | 0.193661 | 0.418627 | UP   | 534.3329 | 534.3329 |
| 2935 | M423T37  | 372.0686 | 8.539425 | 1.560418 | 0.193679 | 0.418631 | UP   | 423.1383 | 423.1381 |
| 2936 | M407T31  | 13.54985 | -3.7602  | -1.55829 | 0.193772 | 0.418656 | DOWN | 406.7223 | 406.722  |
| 2937 | M442T11_ | 2.910014 | 1.541026 | 1.45344  | 0.193993 | 0.418713 | UP   | 442.2351 | 442.2331 |
| 2938 | M775T31_ | 25.57022 | -4.67639 | -1.55715 | 0.194161 | 0.418757 | DOWN | 774.9627 | 774.9619 |
| 2939 | M804T31  | 8.741062 | 3.127809 | 1.537925 | 0.194174 | 0.41876  | UP   | 804.0963 | 804.0956 |
| 2940 | M305T21  | 109.0757 | 6.769186 | 1.558233 | 0.194176 | 0.418761 | UP   | 305.1516 | 305.1513 |
| 2941 | M323T17_ | 3.184536 | 1.671083 | 1.438844 | 0.194191 | 0.418765 | UP   | 323.0215 | 323.0209 |
| 2942 | M607T34  | 5.712769 | 2.51419  | 1.54732  | 0.194205 | 0.418768 | UP   | 607.3248 | 607.3248 |
| 2943 | M542T10  | 6.734665 | 2.751606 | 1.546187 | 0.194352 | 0.418807 | UP   | 542.1928 | 542.1913 |
| 2944 | M282T26  | 2.322626 | 1.215757 | 1.415593 | 0.194642 | 0.418882 | UP   | 282.131  | 282.1307 |
| 2945 | M326T27_ | 7.836132 | -2.97014 | -1.55279 | 0.194651 | 0.418885 | DOWN | 326.0978 | 326.0974 |
| 2946 | M323T14  | 293.3453 | 8.196456 | 1.556136 | 0.19466  | 0.418887 | UP   | 323.195  | 323.1947 |
| 2947 | M563T23_ | 36.78246 | 5.200946 | 1.555534 | 0.194742 | 0.418908 | UP   | 563.2388 | 563.2387 |
| 2948 | M671T43  | 1.415532 | 0.501344 | 1.453459 | 0.194781 | 0.418918 | UP   | 670.5106 | 670.5101 |
| 2949 | M1869T10 | 8.428453 | 3.075268 | 1.54404  | 0.194841 | 0.418934 | UP   | 1869.229 | 1869.225 |
| 2950 | M446T9_2 | 2.344544 | -1.22931 | -1.4705  | 0.194853 | 0.418937 | DOWN | 445.9704 | 445.97   |
| 2951 | M481T32_ | 2.584256 | 1.369749 | 1.447931 | 0.1949   | 0.418949 | UP   | 481.0927 | 481.0924 |
| 2952 | M571T44_ | 1.22908  | 0.297579 | 1.417331 | 0.19494  | 0.418959 | UP   | 571.4148 | 571.4139 |
| 2953 | M253T26  | 2.695854 | -1.43074 | -1.51739 | 0.194958 | 0.418964 | DOWN | 253.1951 | 253.195  |
| 2954 | M469T44  | 1.156362 | 0.209593 | 1.418207 | 0.195012 | 0.418978 | UP   | 469.3607 | 469.3598 |
| 2955 | M444T32  | 2.44201  | 1.288069 | 1.490887 | 0.195071 | 0.418993 | UP   | 444.0616 | 444.0615 |
| 2956 | M316T29  | 3.142524 | -1.65192 | -1.50169 | 0.195079 | 0.418995 | DOWN | 315.6302 | 315.6298 |
| 2957 | M769T26  | 2.834043 | 1.502861 | 1.41476  | 0.195094 | 0.418999 | UP   | 768.7852 | 768.7843 |
| 2958 | M420T44_ | 6.499879 | -2.70041 | -1.54861 | 0.195132 | 0.419009 | DOWN | 420.3681 | 420.3676 |
| 2959 | M440T22  | 2.290144 | 1.195438 | 1.416071 | 0.195135 | 0.41901  | UP   | 440.0442 | 440.0436 |
| 2960 | M706T10_ | 4.266331 | 2.092996 | 1.497194 | 0.195173 | 0.419019 | UP   | 706.473  | 706.4701 |

|      |          |          |          |          |          |          |      |          |          |
|------|----------|----------|----------|----------|----------|----------|------|----------|----------|
| 2961 | M627T31_ | 119.9412 | 6.906184 | 1.552923 | 0.195398 | 0.419078 | UP   | 626.9839 | 626.9837 |
| 2962 | M469T17  | 3.832192 | 1.93817  | 1.448485 | 0.195405 | 0.419079 | UP   | 468.9518 | 468.9515 |
| 2963 | M427T18_ | 18.36112 | 4.198582 | 1.54996  | 0.195416 | 0.419082 | UP   | 427.1047 | 427.1047 |
| 2964 | M619T32  | 2.675641 | 1.419884 | 1.434372 | 0.195507 | 0.419105 | UP   | 618.8952 | 618.895  |
| 2965 | M417T16  | 2.973591 | 1.572206 | 1.424703 | 0.195776 | 0.419175 | UP   | 416.9021 | 416.9017 |
| 2966 | M687T10_ | 2.461644 | 1.299622 | 1.46999  | 0.195937 | 0.419216 | UP   | 687.2868 | 687.2857 |
| 2967 | M404T24  | 2.923382 | -1.54764 | -1.5421  | 0.195985 | 0.419228 | DOWN | 404.3009 | 404.3007 |
| 2968 | M721T29  | 2.572389 | 1.363109 | 1.41399  | 0.196151 | 0.419271 | UP   | 721.1938 | 721.1934 |
| 2969 | M527T19  | 6.63574  | 2.730257 | 1.521034 | 0.196175 | 0.419277 | UP   | 526.9868 | 526.9865 |
| 2970 | M570T36_ | 2.115137 | -1.08075 | -1.53498 | 0.196286 | 0.419305 | DOWN | 570.4273 | 570.4267 |
| 2971 | M374T29_ | 3.643609 | 1.865368 | 1.438395 | 0.196404 | 0.419336 | UP   | 373.5609 | 373.5607 |
| 2972 | M333T26  | 2.400678 | 1.263442 | 1.421722 | 0.196451 | 0.419348 | UP   | 332.5954 | 332.595  |
| 2973 | M338T16_ | 39.37142 | 5.299077 | 1.54756  | 0.196626 | 0.419392 | UP   | 338.2232 | 338.223  |
| 2974 | M681T43_ | 1.166196 | 0.221811 | 1.408486 | 0.196893 | 0.41946  | UP   | 681.4811 | 681.4799 |
| 2975 | M221T28_ | 6.130008 | 2.615889 | 1.524281 | 0.19718  | 0.419533 | UP   | 221.1035 | 221.0967 |
| 2976 | M560T18  | 2.04135  | 1.029523 | 1.408033 | 0.197189 | 0.419535 | UP   | 560.01   | 560.0089 |
| 2977 | M680T9_2 | 6.162381 | 2.623488 | 1.531423 | 0.197239 | 0.419548 | UP   | 679.6756 | 679.6699 |
| 2978 | M366T22  | 621.1033 | 9.278689 | 1.544239 | 0.197412 | 0.419592 | UP   | 366.2544 | 366.2542 |
| 2979 | M401T10_ | 2.216699 | 1.148413 | 1.406066 | 0.197419 | 0.419593 | UP   | 401.2645 | 401.2631 |
| 2980 | M368T12  | 2.601817 | 1.379519 | 1.443263 | 0.197475 | 0.419608 | UP   | 368.2646 | 368.2642 |
| 2981 | M303T37_ | 2.046507 | 1.033164 | 1.414397 | 0.197516 | 0.419618 | UP   | 303.2232 | 303.223  |
| 2982 | M283T19_ | 60.80498 | 5.926118 | 1.543516 | 0.197555 | 0.419628 | UP   | 282.6293 | 282.6292 |
| 2983 | M398T34  | 3.36682  | 1.751386 | 1.491695 | 0.197623 | 0.419645 | UP   | 397.8053 | 397.8048 |
| 2984 | M453T21_ | 10.29924 | -3.36447 | -1.53862 | 0.197657 | 0.419654 | DOWN | 453.1581 | 453.1579 |
| 2985 | M469T12_ | 1.887135 | 0.916198 | 1.413392 | 0.197714 | 0.419668 | UP   | 469.3467 | 469.3459 |
| 2986 | M331T12  | 294.6771 | 8.202991 | 1.542625 | 0.197788 | 0.419687 | UP   | 331.175  | 331.1747 |
| 2987 | M443T29_ | 2.69933  | 1.432601 | 1.405865 | 0.197852 | 0.419703 | UP   | 443.0789 | 443.0787 |
| 2988 | M668T43_ | 1.233116 | 0.302308 | 1.43719  | 0.198023 | 0.419746 | UP   | 667.9808 | 667.9795 |
| 2989 | M219T12_ | 2.487061 | 1.314442 | 1.493176 | 0.198101 | 0.419766 | UP   | 219.0994 | 219.0993 |
| 2990 | M620T32_ | 32.45608 | -5.02042 | -1.54049 | 0.198164 | 0.419781 | DOWN | 620.2459 | 620.2453 |
| 2991 | M345T11_ | 2.151157 | 1.105113 | 1.403334 | 0.198173 | 0.419784 | UP   | 345.2068 | 345.206  |
| 2992 | M964T43  | 32.92018 | 5.0409   | 1.540289 | 0.198246 | 0.419802 | UP   | 963.7398 | 963.7392 |
| 2993 | M748T19_ | 1.980911 | 0.986164 | 1.403087 | 0.198249 | 0.419803 | UP   | 747.5439 | 747.5426 |
| 2994 | M294T32_ | 3.686014 | -1.88206 | -1.52251 | 0.198305 | 0.419817 | DOWN | 293.6365 | 293.6362 |
| 2995 | M779T10_ | 5.80803  | 2.538049 | 1.513812 | 0.198404 | 0.419841 | UP   | 779.438  | 779.4363 |
| 2996 | M522T12_ | 4.778646 | 2.256602 | 1.507038 | 0.198489 | 0.419863 | UP   | 522.4053 | 522.4051 |
| 2997 | M736T10  | 3.681543 | 1.880311 | 1.494736 | 0.198553 | 0.419879 | UP   | 736.4709 | 736.47   |
| 2998 | M352T29_ | 2.645148 | 1.403349 | 1.40826  | 0.198575 | 0.419884 | UP   | 351.5935 | 351.5929 |
| 2999 | M342T19  | 28.28249 | 4.821837 | 1.538314 | 0.198683 | 0.419911 | UP   | 342.1434 | 342.1432 |
| 3000 | M314T30_ | 1.912693 | 0.935605 | 1.433608 | 0.198788 | 0.419938 | UP   | 314.1469 | 314.1465 |
| 3001 | M963T43  | 33.77888 | 5.07805  | 1.537597 | 0.198901 | 0.419966 | UP   | 962.7365 | 962.7356 |
| 3002 | M463T31  | 2.018032 | 1.012949 | 1.411431 | 0.198924 | 0.419972 | UP   | 463.1713 | 463.1706 |
| 3003 | M288T32_ | 2.698683 | 1.432256 | 1.402445 | 0.198988 | 0.419988 | UP   | 287.6436 | 287.6436 |
| 3004 | M832T35  | 6.943076 | 2.795575 | 1.524623 | 0.199061 | 0.420006 | UP   | 831.6246 | 831.6242 |
| 3005 | M801T23_ | 42.74104 | -5.41755 | -1.53699 | 0.199103 | 0.420016 | DOWN | 801.4332 | 801.4327 |
| 3006 | M199T22  | 1.755962 | -0.81226 | -1.46896 | 0.199125 | 0.420022 | DOWN | 199.1887 | 199.1884 |
| 3007 | M258T9   | 2.352768 | -1.23436 | -1.4373  | 0.199227 | 0.420047 | DOWN | 258.132  | 258.1315 |



|      |          |          |          |          |          |          |      |          |          |
|------|----------|----------|----------|----------|----------|----------|------|----------|----------|
| 3008 | M749T41_ | 5.58804  | -2.48234 | -1.52621 | 0.199248 | 0.420052 | DOWN | 749.2194 | 749.218  |
| 3009 | M443T24  | 2.115164 | -1.08077 | -1.42463 | 0.199297 | 0.420065 | DOWN | 443.2405 | 443.2402 |
| 3010 | M347T11  | 1.996039 | 0.99714  | 1.40298  | 0.199425 | 0.420096 | UP   | 347.1856 | 347.1853 |
| 3011 | M384T18_ | 2.533765 | 1.341283 | 1.41924  | 0.199481 | 0.42011  | UP   | 384.0039 | 384.0033 |
| 3012 | M260T9_2 | 2.972992 | -1.57192 | -1.45506 | 0.199495 | 0.420114 | DOWN | 260.1301 | 260.1294 |
| 3013 | M618T10  | 2.336484 | 1.224339 | 1.398366 | 0.199567 | 0.420132 | UP   | 617.851  | 617.849  |
| 3014 | M540T28_ | 14.93738 | -3.90085 | -1.53271 | 0.19965  | 0.420152 | DOWN | 540.2399 | 540.2395 |
| 3015 | M595T11  | 2.280826 | 1.189556 | 1.415208 | 0.19981  | 0.420192 | UP   | 595.4083 | 595.4071 |
| 3016 | M707T10_ | 3.858129 | 1.947901 | 1.475335 | 0.199811 | 0.420192 | UP   | 706.9744 | 706.9718 |
| 3017 | M669T11  | 2.64741  | 1.404582 | 1.397433 | 0.199824 | 0.420195 | UP   | 668.5118 | 668.5113 |
| 3018 | M541T31  | 2.619095 | 1.389068 | 1.404558 | 0.199874 | 0.420208 | UP   | 541.0095 | 541.009  |
| 3019 | M388T39  | 6.147299 | 2.619953 | 1.500221 | 0.199936 | 0.420223 | UP   | 388.1319 | 388.1317 |
| 3020 | M780T10_ | 5.42377  | 2.439296 | 1.504324 | 0.19995  | 0.420226 | UP   | 780.4423 | 780.4411 |
| 3021 | M289T11_ | 176.5877 | 7.464241 | 1.532718 | 0.200114 | 0.420267 | UP   | 289.1535 | 289.1528 |
| 3022 | M873T10  | 2.964542 | 1.567809 | 1.472881 | 0.200337 | 0.420322 | UP   | 872.5461 | 872.5443 |
| 3023 | M496T31_ | 1.495057 | -0.5802  | -1.39834 | 0.20038  | 0.420333 | DOWN | 496.3396 | 496.3383 |
| 3024 | M580T20  | 2.281229 | 1.189811 | 1.401286 | 0.200473 | 0.420356 | UP   | 580.4214 | 580.4194 |
| 3025 | M207T27_ | 2.238897 | 1.162788 | 1.398528 | 0.200475 | 0.420356 | UP   | 206.5876 | 206.5876 |
| 3026 | M375T35  | 2.252926 | 1.1718   | 1.415521 | 0.200523 | 0.420368 | UP   | 375.183  | 375.1826 |
| 3027 | M306T23_ | 3.979431 | -1.99256 | -1.46672 | 0.200598 | 0.420386 | DOWN | 306.2536 | 306.247  |
| 3028 | M498T30_ | 2.900142 | 1.536124 | 1.405097 | 0.200623 | 0.420393 | UP   | 498.1778 | 498.1774 |
| 3029 | M440T12  | 69.97436 | 6.128755 | 1.530528 | 0.200624 | 0.420393 | UP   | 440.2458 | 440.2453 |
| 3030 | M697T9_4 | 3.896593 | 1.962213 | 1.490246 | 0.200658 | 0.420401 | UP   | 697.4417 | 697.4404 |
| 3031 | M429T10_ | 3.626639 | 1.858633 | 1.451304 | 0.200674 | 0.420405 | UP   | 429.2251 | 429.2245 |
| 3032 | M371T30_ | 2.973505 | 1.572164 | 1.520125 | 0.200797 | 0.420435 | UP   | 371.1835 | 371.1829 |
| 3033 | M429T29_ | 4.675445 | 2.225104 | 1.52333  | 0.200962 | 0.420476 | UP   | 429.2235 | 429.2235 |
| 3034 | M833T45  | 1.257402 | 0.330445 | 1.393511 | 0.200963 | 0.420476 | UP   | 832.6365 | 832.6348 |
| 3035 | M262T26_ | 2.035666 | -1.0255  | -1.48939 | 0.201175 | 0.420528 | DOWN | 262.1802 | 262.1798 |
| 3036 | M271T25  | 3.301244 | 1.72301  | 1.486991 | 0.20118  | 0.420529 | UP   | 271.2827 | 271.2823 |
| 3037 | M368T10_ | 3.672214 | 1.87665  | 1.451838 | 0.201423 | 0.420588 | UP   | 367.721  | 367.7203 |
| 3038 | M248T17_ | 2.533909 | 1.341365 | 1.400129 | 0.201503 | 0.420608 | UP   | 248.0218 | 248.0217 |
| 3039 | M488T28  | 2.749348 | 1.45909  | 1.392053 | 0.201609 | 0.420634 | UP   | 488.1032 | 488.1027 |
| 3040 | M478T11_ | 2.301861 | 1.202801 | 1.394665 | 0.201659 | 0.420646 | UP   | 478.4007 | 478.3994 |
| 3041 | M494T29_ | 3.323739 | 1.732807 | 1.421968 | 0.201709 | 0.420658 | UP   | 494.0324 | 494.0319 |
| 3042 | M303T34  | 8.037914 | -3.00682 | -1.52076 | 0.201734 | 0.420664 | DOWN | 303.2169 | 303.2165 |
| 3043 | M863T29  | 2.889905 | 1.531022 | 1.390844 | 0.201768 | 0.420673 | UP   | 863.1297 | 863.1289 |
| 3044 | M769T29  | 2.300471 | 1.201929 | 1.393843 | 0.20181  | 0.420683 | UP   | 769.1941 | 769.1935 |
| 3045 | M448T32_ | 2.902834 | 1.537462 | 1.390832 | 0.20187  | 0.420697 | UP   | 447.5337 | 447.5335 |
| 3046 | M280T27_ | 2.385569 | -1.25433 | -1.49314 | 0.201875 | 0.420699 | DOWN | 280.1908 | 280.1904 |
| 3047 | M338T17_ | 12.41139 | 3.633592 | 1.520686 | 0.201882 | 0.4207   | UP   | 338.0883 | 338.0881 |
| 3048 | M681T9_3 | 43.51117 | -5.44331 | -1.52474 | 0.201901 | 0.420705 | DOWN | 681.2126 | 681.2124 |
| 3049 | M520T44  | 38.06649 | 5.25045  | 1.524596 | 0.201992 | 0.420727 | UP   | 519.9069 | 519.9067 |
| 3050 | M543T32  | 5.225797 | 2.385651 | 1.507923 | 0.202005 | 0.42073  | UP   | 543.4297 | 543.4292 |
| 3051 | M236T22  | 4.229961 | -2.08064 | -1.5101  | 0.202081 | 0.420749 | DOWN | 236.2224 | 236.222  |
| 3052 | M866T42_ | 1.586041 | 0.66543  | 1.396286 | 0.202103 | 0.420754 | UP   | 866.0995 | 866.0987 |
| 3053 | M735T41  | 2.545744 | 1.348087 | 1.492043 | 0.202124 | 0.420759 | UP   | 735.2356 | 735.2354 |
| 3054 | M901T10  | 3.94313  | 1.979341 | 1.447514 | 0.202127 | 0.42076  | UP   | 901.4493 | 901.4483 |

|      |          |          |          |          |          |          |      |          |          |
|------|----------|----------|----------|----------|----------|----------|------|----------|----------|
| 3055 | M336T44  | 2.248458 | 1.168936 | 1.48145  | 0.20218  | 0.420773 | UP   | 336.2209 | 336.2206 |
| 3056 | M519T44_ | 22.53104 | 4.493842 | 1.522236 | 0.202551 | 0.420863 | UP   | 519.4052 | 519.405  |
| 3057 | M312T13  | 2.062873 | 1.044655 | 1.38862  | 0.202571 | 0.420867 | UP   | 312.2326 | 312.232  |
| 3058 | M351T10_ | 10.19715 | 3.350094 | 1.515953 | 0.202706 | 0.4209   | UP   | 350.8794 | 350.8789 |
| 3059 | M603T22  | 45.55651 | 5.509585 | 1.521563 | 0.202744 | 0.420909 | UP   | 603.21   | 603.2097 |
| 3060 | M454T11  | 2.569002 | 1.361208 | 1.424694 | 0.202807 | 0.420924 | UP   | 453.8431 | 453.8348 |
| 3061 | M589T24  | 77.85398 | 6.282699 | 1.521134 | 0.202854 | 0.420936 | UP   | 589.2307 | 589.2306 |
| 3062 | M442T24  | 8.70209  | 3.121362 | 1.5193   | 0.203173 | 0.421013 | UP   | 442.1856 | 442.1849 |
| 3063 | M745T41  | 3.647909 | -1.86707 | -1.49896 | 0.203379 | 0.421062 | DOWN | 745.2252 | 745.2237 |
| 3064 | M381T15_ | 2.632315 | 1.396332 | 1.456604 | 0.203414 | 0.421071 | UP   | 381.2694 | 381.2689 |
| 3065 | M564T19  | 16.77795 | 4.068494 | 1.518502 | 0.203435 | 0.421076 | UP   | 564.2511 | 564.251  |
| 3066 | M500T10_ | 2.04245  | 1.030301 | 1.400416 | 0.203444 | 0.421078 | UP   | 500.3486 | 500.3479 |
| 3067 | M454T30  | 2.425134 | 1.278064 | 1.426696 | 0.203445 | 0.421078 | UP   | 454.368  | 454.3674 |
| 3068 | M509T22_ | 4.712904 | 2.236616 | 1.483635 | 0.203454 | 0.42108  | UP   | 509.1164 | 509.1162 |
| 3069 | M584T44  | 1.443459 | -0.52953 | -1.47514 | 0.20351  | 0.421093 | DOWN | 584.3277 | 584.327  |
| 3070 | M228T43  | 1.151789 | -0.20388 | -1.38458 | 0.203607 | 0.421117 | DOWN | 228.1957 | 228.1954 |
| 3071 | M340T38  | 1.657938 | 0.72939  | 1.384696 | 0.203674 | 0.421133 | UP   | 340.3211 | 340.3205 |
| 3072 | M700T26  | 2.885988 | 1.529065 | 1.413243 | 0.203831 | 0.42117  | UP   | 700.128  | 700.1273 |
| 3073 | M341T10_ | 2.125015 | 1.087473 | 1.46164  | 0.203862 | 0.421178 | UP   | 341.2438 | 341.2427 |
| 3074 | M679T10  | 2.980274 | 1.575445 | 1.394316 | 0.203879 | 0.421182 | UP   | 679.4065 | 679.3999 |
| 3075 | M228T42  | 1.13304  | -0.1802  | -1.38409 | 0.203899 | 0.421187 | DOWN | 228.1958 | 228.1955 |
| 3076 | M551T26  | 10.3511  | 3.371712 | 1.515543 | 0.204096 | 0.421234 | UP   | 551.3231 | 551.3227 |
| 3077 | M230T10_ | 3.568931 | 1.835492 | 1.421429 | 0.204169 | 0.421251 | UP   | 230.0937 | 230.0934 |
| 3078 | M572T19_ | 2.156331 | 1.108579 | 1.41306  | 0.204216 | 0.421262 | UP   | 571.8774 | 571.8766 |
| 3079 | M542T22_ | 57.10876 | 5.83564  | 1.514948 | 0.204329 | 0.421289 | UP   | 542.1584 | 542.158  |
| 3080 | M509T31_ | 33.09374 | 5.048486 | 1.513491 | 0.204467 | 0.421322 | UP   | 509.048  | 509.0479 |
| 3081 | M356T14  | 68.61136 | 6.100375 | 1.514293 | 0.204496 | 0.421329 | UP   | 356.1509 | 356.1508 |
| 3082 | M193T24  | 1.91796  | 0.939572 | 1.502611 | 0.204503 | 0.421331 | UP   | 193.0861 | 193.0859 |
| 3083 | M568T16  | 7.943294 | 2.989737 | 1.498376 | 0.205012 | 0.421451 | UP   | 568.1302 | 568.1295 |
| 3084 | M538T12_ | 2.166407 | 1.115305 | 1.379509 | 0.205076 | 0.421466 | UP   | 538.4006 | 538.3994 |
| 3085 | M989T11  | 3.244625 | 1.698052 | 1.433698 | 0.205095 | 0.421471 | UP   | 988.6102 | 988.6099 |
| 3086 | M721T41  | 3.458357 | -1.79009 | -1.48903 | 0.205117 | 0.421476 | DOWN | 721.2583 | 721.257  |
| 3087 | M311T15  | 19.34911 | 4.274195 | 1.511354 | 0.205199 | 0.421496 | UP   | 311.1951 | 311.1949 |
| 3088 | M933T9_1 | 4.203778 | 2.071687 | 1.462953 | 0.20526  | 0.42151  | UP   | 932.6434 | 932.6401 |
| 3089 | M352T19  | 8.279775 | 3.049592 | 1.507795 | 0.20541  | 0.421545 | UP   | 352.2388 | 352.2385 |
| 3090 | M230T10_ | 3.322121 | 1.732105 | 1.414174 | 0.205412 | 0.421546 | UP   | 229.5975 | 229.5972 |
| 3091 | M398T19  | 2.717603 | 1.442335 | 1.383461 | 0.205463 | 0.421558 | UP   | 397.9988 | 397.9987 |
| 3092 | M259T9_2 | 2.683531 | -1.42413 | -1.42768 | 0.205587 | 0.421587 | DOWN | 259.1305 | 259.1299 |
| 3093 | M527T44_ | 1.189508 | 0.250365 | 1.409717 | 0.205618 | 0.421594 | UP   | 526.8866 | 526.8858 |
| 3094 | M686T31_ | 3.47124  | 1.795451 | 1.503086 | 0.205775 | 0.421631 | UP   | 686.3645 | 686.3639 |
| 3095 | M576T30  | 1.208588 | 0.273322 | 1.396731 | 0.205807 | 0.421639 | UP   | 576.4109 | 576.4099 |
| 3096 | M483T32_ | 2.015008 | 1.010786 | 1.379844 | 0.205874 | 0.421654 | UP   | 483.4519 | 483.4518 |
| 3097 | M324T17  | 3.158012 | 1.659017 | 1.402064 | 0.205882 | 0.421656 | UP   | 324.0251 | 324.0249 |
| 3098 | M370T28_ | 1.932223 | 0.950261 | 1.380791 | 0.205884 | 0.421657 | UP   | 369.5991 | 369.5986 |
| 3099 | M435T9_1 | 2.118757 | -1.08322 | -1.42414 | 0.205937 | 0.421669 | DOWN | 434.7798 | 434.7796 |
| 3100 | M419T27_ | 2.245023 | 1.16673  | 1.395316 | 0.20604  | 0.421694 | UP   | 419.1267 | 419.1261 |
| 3101 | M456T20  | 12.33264 | 3.62441  | 1.507119 | 0.206114 | 0.421711 | UP   | 456.2015 | 456.2012 |

|      |          |          |          |          |          |          |      |          |          |
|------|----------|----------|----------|----------|----------|----------|------|----------|----------|
| 3102 | M498T32  | 3.359922 | 1.748428 | 1.464127 | 0.206191 | 0.421729 | UP   | 498.4001 | 498.399  |
| 3103 | M829T11  | 2.681573 | 1.423079 | 1.404223 | 0.206326 | 0.421761 | UP   | 829.35   | 829.3479 |
| 3104 | M463T24  | 8.353578 | -3.06239 | -1.50323 | 0.20685  | 0.421883 | DOWN | 463.1744 | 463.1744 |
| 3105 | M317T30_ | 3.196043 | -1.67629 | -1.47669 | 0.206919 | 0.421899 | DOWN | 316.638  | 316.6378 |
| 3106 | M275T31  | 2.697006 | 1.431359 | 1.378957 | 0.207078 | 0.421936 | UP   | 274.6357 | 274.6355 |
| 3107 | M374T12  | 1.813295 | 0.858614 | 1.373691 | 0.207096 | 0.42194  | UP   | 374.291  | 374.2903 |
| 3108 | M574T34_ | 1.796944 | 0.845545 | 1.408357 | 0.207497 | 0.422033 | UP   | 574.4114 | 574.4108 |
| 3109 | M621T10_ | 2.577728 | 1.3661   | 1.423979 | 0.207564 | 0.422049 | UP   | 621.3941 | 621.3934 |
| 3110 | M529T34  | 2.246652 | 1.167776 | 1.392408 | 0.207622 | 0.422062 | UP   | 529.3817 | 529.3809 |
| 3111 | M173T9_3 | 8.279535 | 3.04955  | 1.496969 | 0.207626 | 0.422063 | UP   | 173.2612 | 173.2545 |
| 3112 | M306T32_ | 12.75127 | -3.67257 | -1.49935 | 0.207643 | 0.422067 | DOWN | 306.1218 | 306.1214 |
| 3113 | M469T13  | 3.266534 | 1.707761 | 1.382891 | 0.207728 | 0.422087 | UP   | 468.8606 | 468.8603 |
| 3114 | M705T20  | 2.533145 | 1.34093  | 1.427985 | 0.207895 | 0.422125 | UP   | 704.5697 | 704.5692 |
| 3115 | M613T11  | 3.460643 | 1.79104  | 1.439282 | 0.207962 | 0.422141 | UP   | 613.261  | 613.2603 |
| 3116 | M247T2   | 5902.767 | 12.52718 | 1.499884 | 0.208029 | 0.422156 | UP   | 246.8621 | 246.8619 |
| 3117 | M298T29  | 3.713423 | 1.89275  | 1.473517 | 0.208387 | 0.422239 | UP   | 298.3106 | 298.3102 |
| 3118 | M622T32_ | 23.95118 | -4.58202 | -1.49725 | 0.208425 | 0.422247 | DOWN | 622.2425 | 622.2419 |
| 3119 | M335T27  | 2.960596 | 1.565888 | 1.414779 | 0.208471 | 0.422258 | UP   | 335.0182 | 335.0181 |
| 3120 | M404T30  | 1.336393 | -0.41834 | -1.3917  | 0.208523 | 0.42227  | DOWN | 404.2427 | 404.2363 |
| 3121 | M445T37_ | 2.364351 | 1.241444 | 1.468474 | 0.208619 | 0.422292 | UP   | 445.157  | 445.157  |
| 3122 | M396T11  | 2.054452 | 1.038754 | 1.367511 | 0.208709 | 0.422312 | UP   | 396.3589 | 396.3586 |
| 3123 | M376T39  | 1.72292  | -0.78486 | -1.40744 | 0.208828 | 0.42234  | DOWN | 376.3138 | 376.3134 |
| 3124 | M686T31_ | 5.375035 | 2.426274 | 1.452285 | 0.208881 | 0.422352 | UP   | 686.1612 | 686.161  |
| 3125 | M470T10  | 8.47229  | 3.082752 | 1.495375 | 0.208882 | 0.422352 | UP   | 470.2652 | 470.2651 |
| 3126 | M559T34  | 1.863589 | 0.898084 | 1.380155 | 0.208912 | 0.422359 | UP   | 559.4765 | 559.4757 |
| 3127 | M475T43_ | 1.243206 | 0.314066 | 1.407476 | 0.208927 | 0.422362 | UP   | 474.6716 | 474.6713 |
| 3128 | M330T28_ | 1.998268 | 0.99875  | 1.471761 | 0.209051 | 0.422391 | UP   | 330.2498 | 330.2495 |
| 3129 | M345T34  | 1.773186 | -0.82634 | -1.40293 | 0.209153 | 0.422414 | DOWN | 345.3192 | 345.3187 |
| 3130 | M757T29_ | 2.096237 | 1.067802 | 1.395178 | 0.209157 | 0.422415 | UP   | 757.1989 | 757.1987 |
| 3131 | M836T11  | 3.143419 | -1.65233 | -1.47415 | 0.209398 | 0.42247  | DOWN | 836.3471 | 836.3443 |
| 3132 | M313T30_ | 1.846193 | 0.884553 | 1.391358 | 0.209408 | 0.422472 | UP   | 313.1435 | 313.1431 |
| 3133 | M315T31  | 1.927391 | 0.946649 | 1.415786 | 0.20943  | 0.422477 | UP   | 315.1205 | 315.1201 |
| 3134 | M331T13_ | 195.006  | 7.607375 | 1.494158 | 0.20944  | 0.42248  | UP   | 331.1557 | 331.1555 |
| 3135 | M281T37  | 1.57994  | -0.65987 | -1.4679  | 0.209505 | 0.422494 | DOWN | 281.0511 | 281.0506 |
| 3136 | M323T33_ | 1.752374 | 0.809311 | 1.43176  | 0.209517 | 0.422497 | UP   | 323.2497 | 323.2495 |
| 3137 | M538T9   | 2.321502 | -1.21506 | -1.39189 | 0.209614 | 0.422519 | DOWN | 538.2987 | 538.298  |
| 3138 | M298T30_ | 4.438099 | 2.149942 | 1.477928 | 0.209668 | 0.422531 | UP   | 298.3106 | 298.3101 |
| 3139 | M207T26  | 2.011191 | 1.00805  | 1.453175 | 0.209698 | 0.422538 | UP   | 207.0798 | 207.0797 |
| 3140 | M462T9_2 | 20.89038 | 4.384767 | 1.492937 | 0.209702 | 0.422539 | UP   | 462.3537 | 462.3493 |
| 3141 | M450T37  | 1.816714 | 0.861331 | 1.468867 | 0.209762 | 0.422553 | UP   | 450.1574 | 450.1572 |
| 3142 | M252T26  | 5.135362 | -2.36047 | -1.47673 | 0.209849 | 0.422573 | DOWN | 252.127  | 252.1266 |
| 3143 | M334T16  | 3.530725 | 1.819964 | 1.445347 | 0.209863 | 0.422576 | UP   | 334.2744 | 334.2741 |
| 3144 | M425T37  | 35.75053 | 5.159893 | 1.492055 | 0.209929 | 0.422591 | UP   | 425.1351 | 425.1351 |
| 3145 | M278T26_ | 3.303093 | 1.723818 | 1.426222 | 0.210188 | 0.422649 | UP   | 277.6021 | 277.6018 |
| 3146 | M676T26  | 4.847115 | -2.27713 | -1.4788  | 0.210243 | 0.422662 | DOWN | 676.1528 | 676.1523 |
| 3147 | M337T28_ | 1.48189  | 0.567439 | 1.366779 | 0.210298 | 0.422674 | UP   | 336.9294 | 336.9291 |
| 3148 | M712T32  | 5.431971 | 2.441476 | 1.445172 | 0.210417 | 0.422701 | UP   | 712.1772 | 712.1772 |

|      |          |          |          |          |          |          |      |          |          |
|------|----------|----------|----------|----------|----------|----------|------|----------|----------|
| 3149 | M351T44  | 1.446837 | 0.532902 | 1.479185 | 0.210421 | 0.422702 | UP   | 351.1966 | 351.1958 |
| 3150 | M363T11_ | 1.893181 | 0.920812 | 1.363865 | 0.210428 | 0.422704 | UP   | 363.2629 | 363.2615 |
| 3151 | M499T12_ | 185.539  | 7.535578 | 1.489892 | 0.210499 | 0.42272  | UP   | 499.2343 | 499.2338 |
| 3152 | M835T10  | 4.621514 | 2.208365 | 1.448873 | 0.21073  | 0.422772 | UP   | 835.0203 | 835.02   |
| 3153 | M455T32  | 3.069248 | 1.617885 | 1.427073 | 0.210884 | 0.422807 | UP   | 455.3774 | 455.3769 |
| 3154 | M324T31  | 1.69038  | 0.757348 | 1.419038 | 0.211047 | 0.422843 | UP   | 324.2171 | 324.2165 |
| 3155 | M748T41  | 6.576074 | -2.71723 | -1.47225 | 0.211124 | 0.422861 | DOWN | 748.2238 | 748.2233 |
| 3156 | M509T30_ | 2.359552 | -1.23851 | -1.37039 | 0.21137  | 0.422916 | DOWN | 509.1662 | 509.1658 |
| 3157 | M224T13  | 5.689054 | 2.508189 | 1.479664 | 0.211378 | 0.422918 | UP   | 224.2011 | 224.2008 |
| 3158 | M332T10_ | 2.458307 | 1.297665 | 1.419884 | 0.211509 | 0.422947 | UP   | 331.7567 | 331.7556 |
| 3159 | M463T9   | 4.591485 | 2.198961 | 1.441029 | 0.211585 | 0.422964 | UP   | 462.8514 | 462.8499 |
| 3160 | M339T32_ | 2.694598 | 1.43007  | 1.366657 | 0.211677 | 0.422984 | UP   | 338.6036 | 338.6035 |
| 3161 | M768T29  | 2.300358 | 1.201858 | 1.36445  | 0.211738 | 0.422998 | UP   | 768.1908 | 768.189  |
| 3162 | M233T33  | 3.334192 | 1.737337 | 1.444524 | 0.211765 | 0.423004 | UP   | 233.2112 | 233.211  |
| 3163 | M780T34  | 3.967352 | 1.988176 | 1.452039 | 0.211856 | 0.423024 | UP   | 779.5835 | 779.5819 |
| 3164 | M675T32  | 6.544114 | 2.710198 | 1.476344 | 0.211882 | 0.42303  | UP   | 674.5059 | 674.5048 |
| 3165 | M406T12  | 1.842825 | 0.881919 | 1.356758 | 0.211954 | 0.423046 | UP   | 406.3069 | 406.3058 |
| 3166 | M788T41  | 10.79404 | -3.43216 | -1.48051 | 0.211958 | 0.423047 | DOWN | 788.2471 | 788.2466 |
| 3167 | M393T39  | 2.286149 | 1.19292  | 1.471511 | 0.212075 | 0.423073 | UP   | 393.3113 | 393.3107 |
| 3168 | M314T35  | 6.591383 | -2.72058 | -1.48299 | 0.212096 | 0.423078 | DOWN | 314.3418 | 314.3413 |
| 3169 | M320T24_ | 5.89851  | -2.56035 | -1.47875 | 0.212105 | 0.42308  | DOWN | 320.2435 | 320.2428 |
| 3170 | M270T25_ | 2.762148 | 1.465791 | 1.428176 | 0.212117 | 0.423083 | UP   | 270.2794 | 270.2787 |
| 3171 | M733T24  | 1.947073 | 0.961307 | 1.381679 | 0.212208 | 0.423103 | UP   | 732.5479 | 732.5461 |
| 3172 | M525T34  | 2.720919 | 1.444094 | 1.424856 | 0.212363 | 0.423137 | UP   | 525.4497 | 525.4492 |
| 3173 | M219T15  | 4.085075 | 2.030363 | 1.459636 | 0.212447 | 0.423156 | UP   | 219.1746 | 219.1744 |
| 3174 | M440T32_ | 2.540125 | 1.344899 | 1.401422 | 0.212723 | 0.423217 | UP   | 440.0661 | 440.0659 |
| 3175 | M490T13  | 23.18384 | 4.535048 | 1.479201 | 0.212775 | 0.423229 | UP   | 490.207  | 490.2067 |
| 3176 | M469T12_ | 26.10903 | 4.706477 | 1.480488 | 0.212819 | 0.423239 | UP   | 469.245  | 469.2446 |
| 3177 | M708T30_ | 2.648237 | 1.405032 | 1.358767 | 0.212902 | 0.423257 | UP   | 708.1902 | 708.1779 |
| 3178 | M411T12  | 39.96197 | 5.320556 | 1.480071 | 0.212928 | 0.423263 | UP   | 411.2475 | 411.2471 |
| 3179 | M925T9   | 8.54807  | 3.095599 | 1.470857 | 0.21293  | 0.423263 | UP   | 924.6971 | 924.6956 |
| 3180 | M413T30_ | 3.400356 | 1.765686 | 1.419792 | 0.21298  | 0.423274 | UP   | 413.2298 | 413.2292 |
| 3181 | M532T22  | 17.47789 | 4.12746  | 1.479753 | 0.21299  | 0.423276 | UP   | 532.3174 | 532.317  |
| 3182 | M377T10_ | 18.96479 | 4.245252 | 1.478076 | 0.213077 | 0.423296 | UP   | 376.7042 | 376.704  |
| 3183 | M252T10  | 5.908181 | 2.562714 | 1.449763 | 0.213249 | 0.423334 | UP   | 251.9414 | 251.9413 |
| 3184 | M220T10_ | 2.208811 | 1.14327  | 1.362517 | 0.213312 | 0.423347 | UP   | 220.1094 | 220.1089 |
| 3185 | M306T21_ | 199.5705 | 7.640755 | 1.478509 | 0.213349 | 0.423356 | UP   | 306.1241 | 306.1238 |
| 3186 | M624T12  | 2.869589 | 1.520844 | 1.391135 | 0.213435 | 0.423375 | UP   | 623.5309 | 623.5296 |
| 3187 | M454T32_ | 2.804883 | 1.487941 | 1.408986 | 0.21348  | 0.423385 | UP   | 454.3739 | 454.3729 |
| 3188 | M439T18_ | 2.371446 | 1.245767 | 1.37731  | 0.213557 | 0.423402 | UP   | 438.7871 | 438.7867 |
| 3189 | M397T37  | 4.4776   | 2.162726 | 1.472465 | 0.213599 | 0.423411 | UP   | 397.1624 | 397.1622 |
| 3190 | M342T9_4 | 2.838304 | 1.505029 | 1.409433 | 0.213815 | 0.423458 | UP   | 342.1087 | 342.1081 |
| 3191 | M213T23  | 2.34251  | 1.228055 | 1.435404 | 0.213868 | 0.42347  | UP   | 213.0778 | 213.0777 |
| 3192 | M614T37  | 3.439623 | 1.782251 | 1.446057 | 0.21389  | 0.423475 | UP   | 614.4841 | 614.4835 |
| 3193 | M497T21_ | 6.788453 | 2.763083 | 1.473181 | 0.214109 | 0.423523 | UP   | 497.2085 | 497.2083 |
| 3194 | M301T29_ | 2.216564 | 1.148325 | 1.350382 | 0.214179 | 0.423538 | UP   | 300.6335 | 300.6331 |
| 3195 | M451T26  | 3.724717 | 1.897131 | 1.385588 | 0.214339 | 0.423573 | UP   | 451.0176 | 451.0175 |

|      |          |          |          |          |          |          |      |          |          |
|------|----------|----------|----------|----------|----------|----------|------|----------|----------|
| 3196 | M483T23_ | 6.022902 | 2.590459 | 1.472923 | 0.214492 | 0.423607 | UP   | 483.2756 | 483.2755 |
| 3197 | M287T11  | 5.050877 | 2.336534 | 1.439741 | 0.214558 | 0.423621 | UP   | 287.0864 | 287.086  |
| 3198 | M826T10  | 5.818764 | 2.540713 | 1.444217 | 0.214695 | 0.423651 | UP   | 825.587  | 825.5854 |
| 3199 | M374T33  | 1.576187 | 0.656439 | 1.426649 | 0.214739 | 0.42366  | UP   | 374.1655 | 374.1652 |
| 3200 | M584T9   | 1.996253 | -0.99729 | -1.39834 | 0.214823 | 0.423679 | DOWN | 584.4383 | 584.4377 |
| 3201 | M554T28_ | 1.643463 | 0.716739 | 1.370252 | 0.214858 | 0.423686 | UP   | 553.8951 | 553.894  |
| 3202 | M521T24  | 2.915275 | 1.543632 | 1.364819 | 0.214867 | 0.423688 | UP   | 521.0923 | 521.0922 |
| 3203 | M508T22_ | 16.94981 | 4.083197 | 1.472032 | 0.214915 | 0.423699 | UP   | 508.3173 | 508.3171 |
| 3204 | M338T24_ | 2.11239  | 1.078876 | 1.456091 | 0.215003 | 0.423718 | UP   | 338.2412 | 338.2407 |
| 3205 | M418T24  | 9.497633 | -3.24757 | -1.46845 | 0.21503  | 0.423724 | DOWN | 418.1379 | 418.1378 |
| 3206 | M494T17_ | 2.149676 | 1.104119 | 1.380684 | 0.21503  | 0.423724 | UP   | 494.3478 | 494.3469 |
| 3207 | M695T10_ | 5.107154 | 2.352519 | 1.441971 | 0.215049 | 0.423728 | UP   | 694.9251 | 694.9244 |
| 3208 | M724T44  | 1.589916 | 0.66895  | 1.436876 | 0.215349 | 0.423793 | UP   | 724.3546 | 724.3541 |
| 3209 | M424T10_ | 2.586153 | 1.370807 | 1.404528 | 0.215366 | 0.423797 | UP   | 423.8435 | 423.8418 |
| 3210 | M161T11  | 2.368697 | 1.244094 | 1.360187 | 0.2154   | 0.423804 | UP   | 161.154  | 161.1537 |
| 3211 | M409T31  | 53.17017 | 5.732545 | 1.470405 | 0.215402 | 0.423805 | UP   | 409.1232 | 409.1231 |
| 3212 | M703T26  | 2.057365 | 1.040798 | 1.348364 | 0.215492 | 0.423824 | UP   | 702.9944 | 702.9942 |
| 3213 | M275T27_ | 2.236085 | 1.160975 | 1.347262 | 0.215706 | 0.42387  | UP   | 275.1272 | 275.1269 |
| 3214 | M993T38  | 1.422811 | -0.50874 | -1.35631 | 0.215762 | 0.423883 | DOWN | 992.5441 | 992.5427 |
| 3215 | M445T37_ | 1.475633 | -0.56133 | -1.38028 | 0.215776 | 0.423886 | DOWN | 445.1201 | 445.1193 |
| 3216 | M460T15  | 51.88032 | 5.697115 | 1.468683 | 0.215834 | 0.423898 | UP   | 460.2599 | 460.2595 |
| 3217 | M455T15  | 38.47332 | 5.265786 | 1.46854  | 0.21585  | 0.423902 | UP   | 455.2445 | 455.244  |
| 3218 | M523T12  | 2.092475 | 1.065211 | 1.358506 | 0.215913 | 0.423915 | UP   | 523.413  | 523.408  |
| 3219 | M730T29  | 4.356844 | -2.12328 | -1.43825 | 0.216065 | 0.423948 | DOWN | 730.1806 | 730.1804 |
| 3220 | M432T11_ | 3.74159  | 1.903652 | 1.419002 | 0.21608  | 0.423951 | UP   | 432.3431 | 432.3418 |
| 3221 | M736T41  | 1.829426 | 0.871391 | 1.371153 | 0.216298 | 0.423998 | UP   | 736.2335 | 736.2323 |
| 3222 | M328T42  | 2.522705 | -1.33497 | -1.46087 | 0.216309 | 0.424001 | DOWN | 328.3211 | 328.3204 |
| 3223 | M613T12  | 2.022256 | 1.015965 | 1.392731 | 0.216396 | 0.424019 | UP   | 613.388  | 613.3873 |
| 3224 | M701T6   | 11.7719  | -3.55728 | -1.45856 | 0.216432 | 0.424027 | DOWN | 701.4938 | 701.4932 |
| 3225 | M625T43  | 1.211979 | 0.277365 | 1.351064 | 0.216559 | 0.424054 | UP   | 624.9574 | 624.9564 |
| 3226 | M724T32  | 2.616512 | 1.387645 | 1.348984 | 0.216624 | 0.424068 | UP   | 724.2062 | 724.2048 |
| 3227 | M204T31  | 2.536257 | 1.342701 | 1.364813 | 0.216741 | 0.424093 | UP   | 204.2363 | 204.2361 |
| 3228 | M681T43_ | 1.178586 | 0.237057 | 1.344509 | 0.216751 | 0.424095 | UP   | 680.9792 | 680.9779 |
| 3229 | M631T32_ | 10.24306 | 3.356576 | 1.461221 | 0.216798 | 0.424106 | UP   | 631.4827 | 631.4824 |
| 3230 | M676T32  | 8.523121 | 3.091382 | 1.459721 | 0.216823 | 0.424111 | UP   | 675.5088 | 675.5087 |
| 3231 | M414T10_ | 5.374442 | 2.426115 | 1.457205 | 0.216868 | 0.424121 | UP   | 414.2645 | 414.2631 |
| 3232 | M249T9   | 2.320274 | -1.2143  | -1.3419  | 0.216885 | 0.424124 | DOWN | 249.1576 | 249.1571 |
| 3233 | M526T36  | 5.774539 | 2.529706 | 1.456103 | 0.216898 | 0.424127 | UP   | 526.2398 | 526.2394 |
| 3234 | M372T37_ | 4.518616 | -2.17588 | -1.46253 | 0.216965 | 0.424141 | DOWN | 372.3472 | 372.3466 |
| 3235 | M477T11_ | 17.799   | 4.153724 | 1.461711 | 0.216974 | 0.424143 | UP   | 476.9606 | 476.9605 |
| 3236 | M356T13  | 45.97276 | 5.522707 | 1.463724 | 0.217086 | 0.424167 | UP   | 356.1703 | 356.17   |
| 3237 | M223T32  | 1.572199 | -0.65278 | -1.43151 | 0.217132 | 0.424177 | DOWN | 223.0637 | 223.0633 |
| 3238 | M152T31  | 2.545253 | 1.347809 | 1.365377 | 0.217221 | 0.424196 | UP   | 152.0066 | 152.0066 |
| 3239 | M494T14  | 2.557218 | 1.354575 | 1.428046 | 0.217242 | 0.4242   | UP   | 494.3477 | 494.3467 |
| 3240 | M294T10  | 31.12314 | 4.959916 | 1.46284  | 0.217252 | 0.424203 | UP   | 294.1604 | 294.1604 |
| 3241 | M219T13  | 4.062965 | 2.022533 | 1.444032 | 0.2173   | 0.424213 | UP   | 219.1746 | 219.1741 |
| 3242 | M392T41  | 1.841292 | -0.88072 | -1.35742 | 0.217302 | 0.424213 | DOWN | 392.3455 | 392.3448 |

|      |          |          |          |          |          |          |      |          |          |
|------|----------|----------|----------|----------|----------|----------|------|----------|----------|
| 3243 | M615T21  | 21.95943 | 4.456769 | 1.462904 | 0.217312 | 0.424215 | UP   | 615.2911 | 615.2903 |
| 3244 | M244T21_ | 2.413211 | 1.270954 | 1.395435 | 0.217374 | 0.424229 | UP   | 244.2638 | 244.2636 |
| 3245 | M346T26  | 3.193725 | 1.67524  | 1.366747 | 0.217524 | 0.42426  | UP   | 346.1138 | 346.1136 |
| 3246 | M605T18  | 2.073232 | 1.051882 | 1.339707 | 0.217581 | 0.424273 | UP   | 605.0083 | 605.008  |
| 3247 | M408T37_ | 1.662904 | -0.7337  | -1.34619 | 0.217624 | 0.424282 | DOWN | 408.2824 | 408.2822 |
| 3248 | M281T18_ | 33.62276 | 5.071366 | 1.461255 | 0.217669 | 0.424292 | UP   | 281.1073 | 281.1062 |
| 3249 | M282T31_ | 2.186737 | 1.12878  | 1.348313 | 0.217757 | 0.42431  | UP   | 281.5287 | 281.5282 |
| 3250 | M528T24  | 5.471642 | 2.451974 | 1.456825 | 0.217978 | 0.424357 | UP   | 528.3225 | 528.3223 |
| 3251 | M734T24_ | 38.79372 | 5.277751 | 1.460072 | 0.218018 | 0.424366 | UP   | 734.2996 | 734.2987 |
| 3252 | M578T18  | 2.642942 | 1.402145 | 1.392936 | 0.218115 | 0.424386 | UP   | 578.3694 | 578.3683 |
| 3253 | M228T16_ | 6.852351 | -2.7766  | -1.44545 | 0.218159 | 0.424395 | DOWN | 228.2323 | 228.2322 |
| 3254 | M346T31_ | 2.558707 | 1.355415 | 1.446196 | 0.218175 | 0.424399 | UP   | 345.9385 | 345.9379 |
| 3255 | M696T41_ | 2.325773 | -1.21771 | -1.4096  | 0.218206 | 0.424406 | DOWN | 696.3536 | 696.3524 |
| 3256 | M935T11_ | 3.129553 | 1.645957 | 1.362049 | 0.218232 | 0.424411 | UP   | 935.4989 | 935.4985 |
| 3257 | M745T29  | 2.401623 | 1.26401  | 1.341769 | 0.218328 | 0.424431 | UP   | 745.194  | 745.1919 |
| 3258 | M660T31  | 3.596917 | 1.846761 | 1.448644 | 0.21836  | 0.424438 | UP   | 660.4329 | 660.4326 |
| 3259 | M191T8   | 2.173108 | -1.11976 | -1.38994 | 0.218399 | 0.424446 | DOWN | 191.0402 | 191.0401 |
| 3260 | M335T39_ | 7.657557 | 2.936884 | 1.458132 | 0.218458 | 0.424459 | UP   | 335.2263 | 335.2254 |
| 3261 | M1021T44 | 45.27699 | 5.500706 | 1.458272 | 0.218479 | 0.424463 | UP   | 1020.778 | 1020.774 |
| 3262 | M463T34  | 2.417936 | 1.273776 | 1.369536 | 0.218537 | 0.424476 | UP   | 463.3428 | 463.3417 |
| 3263 | M608T21  | 11.26879 | 3.494261 | 1.457695 | 0.218575 | 0.424483 | UP   | 608.3702 | 608.3698 |
| 3264 | M360T15  | 22.86862 | 4.515297 | 1.457642 | 0.218649 | 0.424499 | UP   | 360.1824 | 360.1821 |
| 3265 | M498T37  | 1.817538 | -0.86199 | -1.35435 | 0.218733 | 0.424517 | DOWN | 498.4899 | 498.4893 |
| 3266 | M1022T44 | 39.52202 | 5.304585 | 1.457075 | 0.218768 | 0.424524 | UP   | 1021.782 | 1021.781 |
| 3267 | M403T26  | 1.678576 | 0.747238 | 1.42149  | 0.218864 | 0.424545 | UP   | 403.1351 | 403.1343 |
| 3268 | M536T22_ | 29.47945 | 4.881638 | 1.456746 | 0.218901 | 0.424552 | UP   | 536.3489 | 536.3483 |
| 3269 | M554T34  | 1.981365 | 0.986494 | 1.348395 | 0.218956 | 0.424564 | UP   | 554.4482 | 554.4473 |
| 3270 | M668T41  | 2.047376 | -1.03378 | -1.37959 | 0.218973 | 0.424567 | DOWN | 668.3478 | 668.3466 |
| 3271 | M515T24  | 2.436603 | 1.284871 | 1.343824 | 0.219038 | 0.424581 | UP   | 515.1368 | 515.1365 |
| 3272 | M337T27  | 3.021091 | -1.59507 | -1.45029 | 0.219041 | 0.424582 | DOWN | 337.1775 | 337.1771 |
| 3273 | M468T12_ | 1.892182 | 0.920051 | 1.342979 | 0.219199 | 0.424615 | UP   | 468.3434 | 468.3426 |
| 3274 | M623T12  | 2.843627 | 1.507732 | 1.374123 | 0.21921  | 0.424617 | UP   | 622.5274 | 622.5262 |
| 3275 | M289T32_ | 2.52873  | 1.338413 | 1.337383 | 0.219214 | 0.424618 | UP   | 289.1429 | 289.1425 |
| 3276 | M413T33  | 21.73618 | 4.442026 | 1.454561 | 0.21934  | 0.424645 | UP   | 413.1355 | 413.1352 |
| 3277 | M471T11_ | 3.473883 | -1.79655 | -1.43093 | 0.219404 | 0.424658 | DOWN | 471.1361 | 471.1358 |
| 3278 | M396T31  | 2.201961 | 1.138789 | 1.343284 | 0.219459 | 0.42467  | UP   | 396.0741 | 396.0739 |
| 3279 | M550T37  | 2.350417 | -1.23292 | -1.4075  | 0.21951  | 0.42468  | DOWN | 550.3867 | 550.3856 |
| 3280 | M829T9   | 3.146856 | 1.653911 | 1.382473 | 0.219556 | 0.42469  | UP   | 828.5196 | 828.5181 |
| 3281 | M720T32  | 2.823721 | 1.497597 | 1.350119 | 0.219765 | 0.424734 | UP   | 720.2109 | 720.2107 |
| 3282 | M587T39  | 2.173704 | 1.120155 | 1.358341 | 0.219877 | 0.424757 | UP   | 587.4242 | 587.4234 |
| 3283 | M447T17  | 4.059738 | 2.021387 | 1.385321 | 0.219877 | 0.424757 | UP   | 447.0151 | 447.015  |
| 3284 | M382T19_ | 2.171855 | 1.118928 | 1.336341 | 0.219945 | 0.424771 | UP   | 381.5871 | 381.5867 |
| 3285 | M454T24_ | 9.783083 | -3.29029 | -1.44881 | 0.220137 | 0.424811 | DOWN | 454.2626 | 454.2623 |
| 3286 | M601T33  | 3.122484 | 1.642694 | 1.394584 | 0.220274 | 0.42484  | UP   | 601.3717 | 601.3714 |
| 3287 | M347T32_ | 6.392393 | -2.67636 | -1.44949 | 0.220292 | 0.424844 | DOWN | 347.1483 | 347.148  |
| 3288 | M538T34  | 2.124681 | -1.08725 | -1.41598 | 0.220386 | 0.424863 | DOWN | 538.3503 | 538.3498 |
| 3289 | M195T32  | 9.783534 | 3.290356 | 1.441538 | 0.22041  | 0.424868 | UP   | 194.5696 | 194.5695 |

|      |          |          |          |          |          |          |      |          |          |
|------|----------|----------|----------|----------|----------|----------|------|----------|----------|
| 3290 | M326T31_ | 2.484315 | 1.312848 | 1.371858 | 0.22041  | 0.424868 | UP   | 326.0974 | 326.0971 |
| 3291 | M412T31_ | 1.690441 | 0.757399 | 1.332627 | 0.220414 | 0.424869 | UP   | 412.3057 | 412.3049 |
| 3292 | M465T20  | 15.40411 | 3.945243 | 1.450691 | 0.220421 | 0.42487  | UP   | 465.2944 | 465.2941 |
| 3293 | M280T39  | 2.534417 | 1.341654 | 1.379103 | 0.220436 | 0.424874 | UP   | 280.2635 | 280.2635 |
| 3294 | M372T24_ | 1.684179 | 0.752045 | 1.434198 | 0.22051  | 0.424889 | UP   | 372.2748 | 372.2744 |
| 3295 | M361T11_ | 3.263861 | 1.70658  | 1.426763 | 0.220587 | 0.424905 | UP   | 361.2013 | 361.2007 |
| 3296 | M642T44  | 1.556259 | 0.638082 | 1.43474  | 0.220756 | 0.42494  | UP   | 642.4046 | 642.4038 |
| 3297 | M313T30_ | 2.426073 | 1.278623 | 1.333901 | 0.220774 | 0.424944 | UP   | 312.6413 | 312.6405 |
| 3298 | M279T31_ | 2.654461 | -1.40842 | -1.38335 | 0.220934 | 0.424977 | DOWN | 279.1303 | 279.1282 |
| 3299 | M401T17  | 6.731187 | 2.750861 | 1.427149 | 0.221092 | 0.42501  | UP   | 401.0356 | 401.0353 |
| 3300 | M223T16  | 1.599308 | -0.67745 | -1.40382 | 0.2211   | 0.425011 | DOWN | 223.0637 | 223.0634 |
| 3301 | M403T33_ | 1.625306 | 0.700712 | 1.424454 | 0.221108 | 0.425013 | UP   | 403.1569 | 403.1567 |
| 3302 | M395T32_ | 444.166  | 8.794955 | 1.448099 | 0.221158 | 0.425023 | UP   | 394.8864 | 394.8861 |
| 3303 | M827T10_ | 5.153107 | 2.365443 | 1.420939 | 0.221178 | 0.425028 | UP   | 826.5029 | 826.502  |
| 3304 | M394T34_ | 1.985389 | 0.989422 | 1.337594 | 0.221224 | 0.425037 | UP   | 394.368  | 394.3676 |
| 3305 | M750T41_ | 6.618362 | -2.72647 | -1.44084 | 0.221258 | 0.425044 | DOWN | 750.223  | 750.223  |
| 3306 | M509T38  | 3.557618 | 1.830911 | 1.370702 | 0.221268 | 0.425046 | UP   | 509.1237 | 509.1234 |
| 3307 | M440T39  | 1.944034 | 0.959054 | 1.386195 | 0.221334 | 0.42506  | UP   | 440.4098 | 440.409  |
| 3308 | M885T30  | 1.226577 | 0.294637 | 1.351011 | 0.221335 | 0.42506  | UP   | 884.5954 | 884.5939 |
| 3309 | M442T34_ | 2.592668 | 1.374438 | 1.373891 | 0.22141  | 0.425075 | UP   | 441.8314 | 441.8307 |
| 3310 | M301T16  | 3.1507   | 1.655672 | 1.419517 | 0.22153  | 0.4251   | UP   | 301.0758 | 301.0758 |
| 3311 | M731T11  | 2.190025 | 1.130948 | 1.327999 | 0.221596 | 0.425114 | UP   | 731.1316 | 731.1308 |
| 3312 | M503T30  | 2.603631 | 1.380525 | 1.329302 | 0.221615 | 0.425118 | UP   | 503.1715 | 503.1709 |
| 3313 | M425T14  | 254.3803 | 7.990843 | 1.445547 | 0.221827 | 0.425161 | UP   | 425.2632 | 425.2629 |
| 3314 | M332T24_ | 1.624998 | 0.700438 | 1.347973 | 0.221906 | 0.425178 | UP   | 332.1493 | 332.1488 |
| 3315 | M375T39  | 1.634212 | -0.7086  | -1.3535  | 0.222048 | 0.425207 | DOWN | 375.3106 | 375.3101 |
| 3316 | M667T43  | 1.174576 | 0.23214  | 1.385467 | 0.222074 | 0.425212 | UP   | 667.4791 | 667.4778 |
| 3317 | M682T10_ | 1.768069 | 0.822175 | 1.324783 | 0.222085 | 0.425214 | UP   | 681.5003 | 681.4973 |
| 3318 | M508T24  | 2.612183 | 1.385256 | 1.329596 | 0.222194 | 0.425237 | UP   | 508.0719 | 508.0713 |
| 3319 | M516T25  | 8.749753 | 3.129242 | 1.443511 | 0.222286 | 0.425256 | UP   | 516.3224 | 516.3223 |
| 3320 | M746T31  | 2.623102 | 1.391274 | 1.326831 | 0.22234  | 0.425267 | UP   | 746.2059 | 746.2057 |
| 3321 | M291T15  | 2.41821  | 1.273939 | 1.355715 | 0.222401 | 0.425279 | UP   | 291.2515 | 291.2513 |
| 3322 | M304T29_ | 2.769291 | -1.46952 | -1.41303 | 0.222666 | 0.425333 | DOWN | 303.6302 | 303.6299 |
| 3323 | M505T16  | 50.97099 | 5.671604 | 1.441759 | 0.222784 | 0.425357 | UP   | 505.235  | 505.2349 |
| 3324 | M436T37  | 1.773082 | 0.826259 | 1.426392 | 0.222813 | 0.425363 | UP   | 436.1707 | 436.1707 |
| 3325 | M575T22  | 2.444654 | 1.28963  | 1.331879 | 0.222896 | 0.42538  | UP   | 574.8532 | 574.8528 |
| 3326 | M342T13_ | 2.128136 | 1.089591 | 1.325207 | 0.222905 | 0.425382 | UP   | 341.7672 | 341.7665 |
| 3327 | M464T20_ | 16.79508 | 4.069967 | 1.440408 | 0.223113 | 0.425425 | UP   | 464.2911 | 464.2908 |
| 3328 | M495T11  | 3.302938 | 1.72375  | 1.351617 | 0.223372 | 0.425477 | UP   | 495.1474 | 495.144  |
| 3329 | M786T41  | 4.191521 | -2.06747 | -1.41974 | 0.223393 | 0.425482 | DOWN | 786.2512 | 786.2507 |
| 3330 | M1039T9  | 2.576017 | 1.365142 | 1.378127 | 0.223422 | 0.425487 | UP   | 1038.746 | 1038.741 |
| 3331 | M567T30_ | 4.857907 | -2.28033 | -1.42286 | 0.223489 | 0.425501 | DOWN | 567.4152 | 567.4151 |
| 3332 | M430T10_ | 3.07708  | 1.621562 | 1.361412 | 0.223551 | 0.425514 | UP   | 430.2222 | 430.2214 |
| 3333 | M219T2_2 | 1711.386 | 10.74095 | 1.438719 | 0.223626 | 0.425529 | UP   | 219.0312 | 219.0311 |
| 3334 | M262T26_ | 2.343619 | 1.228738 | 1.319208 | 0.223673 | 0.425538 | UP   | 261.6177 | 261.6174 |
| 3335 | M478T12_ | 77.7288  | 6.280377 | 1.438176 | 0.223758 | 0.425556 | UP   | 478.234  | 478.2337 |
| 3336 | M497T32  | 5.937913 | 2.569956 | 1.43196  | 0.223832 | 0.425571 | UP   | 497.4188 | 497.418  |

|      |          |          |          |          |          |          |      |          |          |
|------|----------|----------|----------|----------|----------|----------|------|----------|----------|
| 3337 | M418T19  | 4.809074 | 2.265759 | 1.401243 | 0.223833 | 0.425571 | UP   | 418.025  | 418.0246 |
| 3338 | M350T37  | 2.294944 | 1.198459 | 1.364196 | 0.223987 | 0.425602 | UP   | 350.2689 | 350.2688 |
| 3339 | M473T32_ | 4.616416 | 2.206773 | 1.387569 | 0.224056 | 0.425616 | UP   | 473.059  | 473.0588 |
| 3340 | M469T23  | 2.303171 | 1.203621 | 1.326331 | 0.224064 | 0.425617 | UP   | 469.131  | 469.1307 |
| 3341 | M767T10  | 2.666135 | 1.41475  | 1.321389 | 0.224087 | 0.425622 | UP   | 766.6185 | 766.6178 |
| 3342 | M483T32_ | 2.451101 | 1.29343  | 1.358031 | 0.224207 | 0.425646 | UP   | 483.0879 | 483.0873 |
| 3343 | M297T32_ | 1.581631 | -0.66141 | -1.4071  | 0.22426  | 0.425657 | DOWN | 297.0826 | 297.0821 |
| 3344 | M647T43  | 1.222956 | 0.290373 | 1.321583 | 0.224297 | 0.425665 | UP   | 646.9707 | 646.9693 |
| 3345 | M507T31  | 2.575601 | 1.364909 | 1.328169 | 0.224328 | 0.425671 | UP   | 507.4908 | 507.4905 |
| 3346 | M542T32_ | 4.321803 | 2.111633 | 1.415773 | 0.224349 | 0.425675 | UP   | 542.4264 | 542.4261 |
| 3347 | M441T22_ | 2.491917 | 1.317256 | 1.319952 | 0.224397 | 0.425685 | UP   | 441.0413 | 441.04   |
| 3348 | M366T10_ | 3.267092 | 1.708007 | 1.364871 | 0.224425 | 0.42569  | UP   | 366.2223 | 366.221  |
| 3349 | M756T29  | 2.333781 | -1.22267 | -1.38223 | 0.224458 | 0.425697 | DOWN | 756.1793 | 756.1785 |
| 3350 | M408T41_ | 1.891644 | 0.91964  | 1.354639 | 0.224541 | 0.425714 | UP   | 408.3685 | 408.3676 |
| 3351 | M441T34  | 2.485228 | 1.313378 | 1.355728 | 0.224707 | 0.425747 | UP   | 441.3296 | 441.3288 |
| 3352 | M704T27  | 4.749482 | -2.24777 | -1.4224  | 0.224773 | 0.42576  | DOWN | 704.1652 | 704.1646 |
| 3353 | M600T27  | 5.007961 | 2.324223 | 1.431305 | 0.224801 | 0.425766 | UP   | 600.2975 | 600.2974 |
| 3354 | M377T15  | 84.88028 | 6.407358 | 1.434122 | 0.224825 | 0.425771 | UP   | 377.0892 | 377.0889 |
| 3355 | M579T30  | 6.05561  | -2.59827 | -1.42722 | 0.224931 | 0.425792 | DOWN | 579.293  | 579.2922 |
| 3356 | M586T32_ | 5.538656 | 2.469536 | 1.42124  | 0.224947 | 0.425795 | UP   | 586.4527 | 586.4515 |
| 3357 | M384T13  | 99.27394 | 6.633343 | 1.433716 | 0.224949 | 0.425796 | UP   | 384.1822 | 384.182  |
| 3358 | M452T10  | 2.179782 | 1.124184 | 1.376749 | 0.225028 | 0.425811 | UP   | 452.3602 | 452.359  |
| 3359 | M779T29  | 3.473133 | -1.79624 | -1.3807  | 0.22503  | 0.425812 | DOWN | 779.183  | 779.1808 |
| 3360 | M591T32_ | 3.257746 | 1.703874 | 1.3316   | 0.225116 | 0.425829 | UP   | 590.9911 | 590.991  |
| 3361 | M737T9_3 | 6.031035 | 2.592406 | 1.41879  | 0.225118 | 0.42583  | UP   | 737.4294 | 737.4284 |
| 3362 | M552T31_ | 12.08325 | 3.594937 | 1.432622 | 0.225134 | 0.425833 | UP   | 552.072  | 552.0716 |
| 3363 | M411T34_ | 2.420084 | 1.275057 | 1.347917 | 0.225173 | 0.42584  | UP   | 411.3051 | 411.3001 |
| 3364 | M636T24  | 6.93761  | 2.794439 | 1.430289 | 0.225237 | 0.425853 | UP   | 636.3109 | 636.3097 |
| 3365 | M334T39_ | 1.55878  | 0.640417 | 1.407913 | 0.225241 | 0.425854 | UP   | 334.2461 | 334.246  |
| 3366 | M273T32_ | 18.81419 | -4.23375 | -1.4298  | 0.225291 | 0.425864 | DOWN | 273.1812 | 273.1747 |
| 3367 | M353T14  | 2.431316 | 1.281737 | 1.334528 | 0.2253   | 0.425866 | UP   | 353.2884 | 353.288  |
| 3368 | M420T34  | 2.738213 | 1.453235 | 1.366396 | 0.225312 | 0.425868 | UP   | 419.8183 | 419.8174 |
| 3369 | M342T21  | 45.24898 | -5.49981 | -1.43202 | 0.225386 | 0.425883 | DOWN | 342.1915 | 342.1912 |
| 3370 | M489T26  | 2.513363 | 1.329619 | 1.33213  | 0.225435 | 0.425893 | UP   | 488.9439 | 488.9435 |
| 3371 | M389T34_ | 2.567914 | 1.360597 | 1.35328  | 0.225628 | 0.425931 | UP   | 388.7902 | 388.7894 |
| 3372 | M420T12_ | 250.481  | 7.968557 | 1.430543 | 0.225797 | 0.425965 | UP   | 420.2284 | 420.2281 |
| 3373 | M759T10_ | 51.3602  | 5.682579 | 1.430452 | 0.225797 | 0.425965 | UP   | 758.6617 | 758.6608 |
| 3374 | M375T29  | 2.420597 | 1.275363 | 1.343369 | 0.225832 | 0.425972 | UP   | 374.6053 | 374.6046 |
| 3375 | M503T18  | 1.803583 | 0.850866 | 1.355461 | 0.225843 | 0.425974 | UP   | 502.9266 | 502.9261 |
| 3376 | M879T9   | 5.025336 | 2.32922  | 1.411145 | 0.225942 | 0.425994 | UP   | 879.4907 | 879.4888 |
| 3377 | M473T14_ | 29.5807  | 4.886584 | 1.429253 | 0.225947 | 0.425995 | UP   | 473.1103 | 473.1099 |
| 3378 | M480T2   | 1029.515 | 10.00775 | 1.429704 | 0.226022 | 0.42601  | UP   | 479.8215 | 479.8213 |
| 3379 | M634T29_ | 11.74251 | 3.553669 | 1.428975 | 0.226034 | 0.426012 | UP   | 634.4534 | 634.4533 |
| 3380 | M419T34  | 2.114464 | 1.080292 | 1.358408 | 0.226293 | 0.426064 | UP   | 419.3167 | 419.316  |
| 3381 | M293T32  | 2.759312 | -1.46431 | -1.38981 | 0.226416 | 0.426088 | DOWN | 292.6381 | 292.6377 |
| 3382 | M763T31_ | 9.623571 | 3.266572 | 1.42519  | 0.226438 | 0.426093 | UP   | 762.5586 | 762.5579 |
| 3383 | M569T42_ | 1.14237  | 0.19203  | 1.310602 | 0.226523 | 0.42611  | UP   | 568.7347 | 568.7335 |



|      |          |          |          |          |          |          |      |          |          |
|------|----------|----------|----------|----------|----------|----------|------|----------|----------|
| 3384 | M592T22_ | 21.7571  | 4.443415 | 1.427689 | 0.226542 | 0.426113 | UP   | 592.3751 | 592.3748 |
| 3385 | M624T29  | 1.853254 | 0.890061 | 1.317497 | 0.226615 | 0.426128 | UP   | 624.2683 | 624.2675 |
| 3386 | M708T10_ | 3.88721  | 1.958735 | 1.366857 | 0.226617 | 0.426128 | UP   | 707.9752 | 707.9731 |
| 3387 | M398T22  | 2.534947 | 1.341955 | 1.31036  | 0.226796 | 0.426164 | UP   | 398.0194 | 398.0189 |
| 3388 | M588T32  | 5.527741 | -2.46669 | -1.41943 | 0.226971 | 0.426198 | DOWN | 588.264  | 588.2632 |
| 3389 | M244T23_ | 1.943769 | 0.958857 | 1.326601 | 0.227101 | 0.426224 | UP   | 244.2636 | 244.2631 |
| 3390 | M848T41  | 5.638076 | 2.495203 | 1.416439 | 0.227164 | 0.426236 | UP   | 848.418  | 848.4178 |
| 3391 | M336T28_ | 1.82696  | 0.869445 | 1.307983 | 0.227278 | 0.426259 | UP   | 336.2605 | 336.2598 |
| 3392 | M213T15  | 30.11795 | 4.912552 | 1.424692 | 0.227346 | 0.426272 | UP   | 213.1024 | 213.1023 |
| 3393 | M267T13  | 4.834456 | 2.273354 | 1.401877 | 0.227468 | 0.426296 | UP   | 267.0959 | 267.0875 |
| 3394 | M337T18_ | 91.96521 | 6.523016 | 1.424034 | 0.227539 | 0.42631  | UP   | 337.1454 | 337.145  |
| 3395 | M750T27  | 5.283298 | -2.40144 | -1.41149 | 0.22754  | 0.42631  | DOWN | 750.1686 | 750.1676 |
| 3396 | M531T26  | 2.442125 | 1.288137 | 1.327126 | 0.227672 | 0.426336 | UP   | 530.958  | 530.9577 |
| 3397 | M454T21_ | 5.994466 | -2.58363 | -1.4121  | 0.227702 | 0.426342 | DOWN | 454.1615 | 454.1611 |
| 3398 | M705T33  | 2.454958 | 1.295698 | 1.340409 | 0.227864 | 0.426374 | UP   | 705.4884 | 705.4882 |
| 3399 | M593T30  | 4.487413 | -2.16588 | -1.40566 | 0.227898 | 0.426381 | DOWN | 593.3408 | 593.3402 |
| 3400 | M495T43_ | 1.181649 | 0.240802 | 1.305739 | 0.228098 | 0.42642  | UP   | 495.0231 | 495.0222 |
| 3401 | M382T37  | 1.78218  | 0.833643 | 1.314752 | 0.228115 | 0.426423 | UP   | 382.3679 | 382.3673 |
| 3402 | M340T32_ | 2.511243 | 1.328401 | 1.316939 | 0.228137 | 0.426427 | UP   | 339.6038 | 339.6036 |
| 3403 | M529T10  | 2.043569 | 1.031091 | 1.318251 | 0.228217 | 0.426443 | UP   | 529.3599 | 529.3588 |
| 3404 | M558T26_ | 2.551539 | 1.351368 | 1.307229 | 0.228232 | 0.426446 | UP   | 558.0878 | 558.0873 |
| 3405 | M308T9   | 1.945487 | -0.96013 | -1.33563 | 0.228392 | 0.426477 | DOWN | 308.2698 | 308.2692 |
| 3406 | M320T25_ | 5.741388 | -2.5214  | -1.4084  | 0.228456 | 0.42649  | DOWN | 320.2434 | 320.2428 |
| 3407 | M383T20  | 2.586234 | 1.370853 | 1.31301  | 0.22846  | 0.42649  | UP   | 383.0557 | 383.0555 |
| 3408 | M749T12  | 1.82016  | 0.864065 | 1.304723 | 0.22851  | 0.4265   | UP   | 748.5791 | 748.5778 |
| 3409 | M267T14  | 2.780429 | 1.475308 | 1.320715 | 0.228591 | 0.426516 | UP   | 267.0793 | 267.0787 |
| 3410 | M413T19_ | 13.93427 | -3.80057 | -1.41861 | 0.228665 | 0.42653  | DOWN | 413.1923 | 413.1915 |
| 3411 | M460T22_ | 2.481327 | 1.311112 | 1.316351 | 0.228863 | 0.426569 | UP   | 460.0728 | 460.0721 |
| 3412 | M508T11  | 2.429297 | 1.280539 | 1.309879 | 0.229033 | 0.426602 | UP   | 508.1647 | 508.1634 |
| 3413 | M522T12_ | 1.937627 | 0.954291 | 1.312576 | 0.229082 | 0.426611 | UP   | 522.4099 | 522.4088 |
| 3414 | M289T27  | 2.694745 | -1.43015 | -1.39107 | 0.229084 | 0.426612 | DOWN | 289.1541 | 289.1537 |
| 3415 | M665T10  | 3.043368 | 1.605669 | 1.343833 | 0.229258 | 0.426646 | UP   | 665.4208 | 665.4199 |
| 3416 | M373T21_ | 5.43671  | -2.44273 | -1.41302 | 0.229275 | 0.426649 | DOWN | 373.1398 | 373.1392 |
| 3417 | M245T22_ | 2.362525 | 1.240329 | 1.363483 | 0.229355 | 0.426665 | UP   | 245.2673 | 245.2669 |
| 3418 | M470T15  | 1.732834 | 0.793134 | 1.303618 | 0.22944  | 0.426681 | UP   | 470.359  | 470.358  |
| 3419 | M506T17  | 2.022749 | 1.016318 | 1.312656 | 0.229553 | 0.426703 | UP   | 506.4319 | 506.4316 |
| 3420 | M279T31_ | 2.937828 | -1.55475 | -1.35337 | 0.229559 | 0.426704 | DOWN | 279.0855 | 279.0825 |
| 3421 | M306T28_ | 4.522095 | 2.176991 | 1.398422 | 0.22964  | 0.42672  | UP   | 305.5695 | 305.5692 |
| 3422 | M381T33  | 4.670542 | -2.22359 | -1.4066  | 0.229652 | 0.426722 | DOWN | 381.1252 | 381.1246 |
| 3423 | M551T34  | 2.191213 | 1.131729 | 1.323096 | 0.229692 | 0.42673  | UP   | 551.3952 | 551.3944 |
| 3424 | M510T38  | 1.849494 | 0.88713  | 1.301238 | 0.229811 | 0.426753 | UP   | 510.4    | 510.3987 |
| 3425 | M1188T44 | 1.644    | 0.71721  | 1.303889 | 0.229811 | 0.426753 | UP   | 1187.856 | 1187.854 |
| 3426 | M543T12_ | 126.377  | 6.981591 | 1.415449 | 0.229859 | 0.426762 | UP   | 543.2143 | 543.2138 |
| 3427 | M377T28  | 2.386586 | 1.254948 | 1.305694 | 0.229937 | 0.426777 | UP   | 377.105  | 377.1045 |
| 3428 | M442T32  | 2.440869 | 1.287395 | 1.350223 | 0.230158 | 0.42682  | UP   | 442.0614 | 442.0613 |
| 3429 | M259T21  | 71.58531 | 6.161592 | 1.414217 | 0.230196 | 0.426827 | UP   | 259.1096 | 259.1094 |
| 3430 | M672T10_ | 2.696987 | 1.431349 | 1.398936 | 0.230212 | 0.42683  | UP   | 671.8667 | 671.8646 |

|      |          |          |          |          |          |          |      |          |          |
|------|----------|----------|----------|----------|----------|----------|------|----------|----------|
| 3431 | M536T24  | 3.013604 | 1.59149  | 1.413134 | 0.230264 | 0.42684  | UP   | 536.2471 | 536.2467 |
| 3432 | M349T28_ | 2.294398 | 1.198116 | 1.320568 | 0.230401 | 0.426866 | UP   | 349.1522 | 349.1515 |
| 3433 | M341T32_ | 2.63189  | 1.396099 | 1.300302 | 0.230453 | 0.426876 | UP   | 340.6016 | 340.6014 |
| 3434 | M291T22  | 2.689142 | 1.427146 | 1.32967  | 0.23065  | 0.426914 | UP   | 291.0719 | 291.0717 |
| 3435 | M357T19_ | 1.519024 | -0.60314 | -1.31764 | 0.230653 | 0.426915 | DOWN | 357.1844 | 357.1838 |
| 3436 | M778T29  | 3.014601 | -1.59197 | -1.38197 | 0.230663 | 0.426917 | DOWN | 778.1813 | 778.1806 |
| 3437 | M496T32  | 4.744332 | 2.246205 | 1.401664 | 0.230666 | 0.426917 | UP   | 496.4148 | 496.4146 |
| 3438 | M568T31_ | 3.815725 | -1.93196 | -1.39774 | 0.230672 | 0.426918 | DOWN | 568.3378 | 568.3372 |
| 3439 | M331T9_5 | 14.34001 | 3.841974 | 1.41092  | 0.230711 | 0.426926 | UP   | 331.1486 | 331.1481 |
| 3440 | M363T29  | 2.445499 | 1.290129 | 1.306593 | 0.230784 | 0.42694  | UP   | 362.5958 | 362.5957 |
| 3441 | M696T30  | 2.500359 | 1.322136 | 1.29638  | 0.231229 | 0.427025 | UP   | 696.1902 | 696.1893 |
| 3442 | M320T22_ | 1.668023 | -0.73814 | -1.36174 | 0.231351 | 0.427048 | DOWN | 320.1904 | 320.1898 |
| 3443 | M753T30  | 1.175081 | 0.232761 | 1.297387 | 0.231351 | 0.427048 | UP   | 752.5163 | 752.515  |
| 3444 | M351T29_ | 2.413946 | 1.271393 | 1.307336 | 0.231451 | 0.427067 | UP   | 350.5958 | 350.5954 |
| 3445 | M729T9_1 | 5.661222 | 2.501113 | 1.376202 | 0.231629 | 0.427101 | UP   | 728.6134 | 728.6128 |
| 3446 | M579T18  | 2.821123 | 1.496269 | 1.348817 | 0.231652 | 0.427106 | UP   | 579.3727 | 579.3723 |
| 3447 | M532T26  | 2.475261 | 1.307581 | 1.313153 | 0.231854 | 0.427144 | UP   | 531.9657 | 531.9656 |
| 3448 | M508T34_ | 2.291078 | 1.196027 | 1.316327 | 0.231857 | 0.427145 | UP   | 507.8706 | 507.8692 |
| 3449 | M209T7   | 4.269873 | -2.09419 | -1.3811  | 0.232133 | 0.427197 | DOWN | 208.8911 | 208.8907 |
| 3450 | M292T18  | 3.297649 | 1.721438 | 1.369684 | 0.232134 | 0.427197 | UP   | 292.2638 | 292.2634 |
| 3451 | M349T32_ | 5.953982 | -2.57385 | -1.4014  | 0.23217  | 0.427204 | DOWN | 349.1472 | 349.1466 |
| 3452 | M689T43  | 1.20274  | 0.266324 | 1.31883  | 0.232274 | 0.427224 | UP   | 689.4924 | 689.4913 |
| 3453 | M792T21  | 2.916679 | 1.544327 | 1.351559 | 0.232334 | 0.427235 | UP   | 791.5274 | 791.5272 |
| 3454 | M346T33  | 1.865573 | -0.89962 | -1.36067 | 0.232402 | 0.427248 | DOWN | 346.2379 | 346.2375 |
| 3455 | M907T41  | 38.54005 | 5.268286 | 1.405839 | 0.232436 | 0.427254 | UP   | 906.701  | 906.7007 |
| 3456 | M993T31  | 5.003729 | -2.323   | -1.37734 | 0.232476 | 0.427262 | DOWN | 992.6767 | 992.6748 |
| 3457 | M879T10_ | 3.988196 | 1.995736 | 1.369003 | 0.232569 | 0.42728  | UP   | 878.5451 | 878.5442 |
| 3458 | M951T11  | 5.498678 | 2.459085 | 1.372353 | 0.232642 | 0.427293 | UP   | 951.4603 | 951.4592 |
| 3459 | M444T20  | 11.38064 | 3.508509 | 1.405167 | 0.232662 | 0.427297 | UP   | 444.265  | 444.2647 |
| 3460 | M518T11  | 2.760188 | 1.464767 | 1.302664 | 0.232712 | 0.427307 | UP   | 518.1855 | 518.1829 |
| 3461 | M391T22_ | 6.860319 | -2.77828 | -1.40041 | 0.232739 | 0.427312 | DOWN | 391.0025 | 391.0023 |
| 3462 | M456T26  | 2.587654 | 1.371645 | 1.299333 | 0.232797 | 0.427323 | UP   | 456.0603 | 456.0601 |
| 3463 | M719T31  | 6.279331 | 2.650611 | 1.398301 | 0.232854 | 0.427333 | UP   | 718.5323 | 718.5318 |
| 3464 | M378T22_ | 2.37771  | 1.249573 | 1.30124  | 0.232932 | 0.427348 | UP   | 378.2644 | 378.264  |
| 3465 | M324T16  | 5.167044 | 2.369339 | 1.376872 | 0.233083 | 0.427377 | UP   | 324.0897 | 324.0896 |
| 3466 | M424T14_ | 362.5088 | 8.501872 | 1.403283 | 0.233193 | 0.427397 | UP   | 424.2597 | 424.2595 |
| 3467 | M910T34  | 3.008259 | 1.588929 | 1.353703 | 0.233241 | 0.427406 | UP   | 909.6566 | 909.6551 |
| 3468 | M316T20  | 2.36244  | -1.24028 | -1.37751 | 0.233267 | 0.427411 | DOWN | 316.1757 | 316.1757 |
| 3469 | M513T26  | 6.117359 | 2.612909 | 1.401936 | 0.233308 | 0.427419 | UP   | 513.2943 | 513.294  |
| 3470 | M196T11  | 9.222263 | 3.205121 | 1.399857 | 0.233397 | 0.427436 | UP   | 196.0952 | 196.095  |
| 3471 | M552T10  | 2.355525 | 1.236049 | 1.3367   | 0.233499 | 0.427455 | UP   | 552.45   | 552.448  |
| 3472 | M596T33_ | 2.161509 | 1.112039 | 1.309906 | 0.2335   | 0.427455 | UP   | 595.9234 | 595.9225 |
| 3473 | M213T10_ | 2.168261 | 1.116539 | 1.339382 | 0.233531 | 0.427461 | UP   | 213.1781 | 213.1777 |
| 3474 | M397T31  | 1.730292 | -0.79102 | -1.31332 | 0.233619 | 0.427477 | DOWN | 397.201  | 397.2008 |
| 3475 | M481T32_ | 2.778015 | -1.47405 | -1.37199 | 0.233735 | 0.427499 | DOWN | 481.348  | 481.3472 |
| 3476 | M372T22  | 2.284844 | 1.192095 | 1.289194 | 0.233794 | 0.42751  | UP   | 372.02   | 372.0194 |
| 3477 | M530T34_ | 1.941334 | 0.957048 | 1.307916 | 0.233849 | 0.42752  | UP   | 530.3853 | 530.3845 |

|      |          |          |          |          |          |          |      |          |          |
|------|----------|----------|----------|----------|----------|----------|------|----------|----------|
| 3478 | M227T9_1 | 3.418466 | 1.773349 | 1.386068 | 0.233886 | 0.427527 | UP   | 227.1757 | 227.1749 |
| 3479 | M654T44  | 2.538923 | -1.34422 | -1.38074 | 0.234107 | 0.427569 | DOWN | 654.3319 | 654.3314 |
| 3480 | M337T32  | 2.18243  | 1.125936 | 1.338269 | 0.234154 | 0.427577 | UP   | 337.1576 | 337.1569 |
| 3481 | M710T9_2 | 11.42248 | 3.513804 | 1.393692 | 0.234467 | 0.427636 | UP   | 709.6696 | 709.6688 |
| 3482 | M822T34  | 2.943993 | 1.557774 | 1.349203 | 0.23447  | 0.427636 | UP   | 821.6038 | 821.6023 |
| 3483 | M229T18  | 1.584924 | -0.66441 | -1.29696 | 0.234565 | 0.427654 | DOWN | 229.075  | 229.0744 |
| 3484 | M529T24_ | 24.45075 | 4.611807 | 1.397272 | 0.234566 | 0.427654 | UP   | 529.1298 | 529.1298 |
| 3485 | M505T19  | 66.27022 | 6.050289 | 1.397867 | 0.234685 | 0.427676 | UP   | 505.2349 | 505.2348 |
| 3486 | M735T29  | 5.922776 | 2.566274 | 1.376787 | 0.234728 | 0.427684 | UP   | 735.1649 | 735.1647 |
| 3487 | M385T33_ | 9.568545 | -3.2583  | -1.39055 | 0.234794 | 0.427697 | DOWN | 385.1206 | 385.1205 |
| 3488 | M550T22  | 2.556096 | 1.353942 | 1.30761  | 0.234869 | 0.42771  | UP   | 550.1312 | 550.1308 |
| 3489 | M176T16  | 2.769693 | 1.469726 | 1.299485 | 0.234939 | 0.427724 | UP   | 175.5347 | 175.5346 |
| 3490 | M616T10_ | 8.010598 | 3.00191  | 1.380344 | 0.235054 | 0.427745 | UP   | 615.5736 | 615.5729 |
| 3491 | M391T41  | 1.714958 | 0.778174 | 1.289045 | 0.235104 | 0.427754 | UP   | 391.342  | 391.341  |
| 3492 | M397T11  | 2.004234 | 1.003051 | 1.283998 | 0.235241 | 0.42778  | UP   | 397.3622 | 397.362  |
| 3493 | M279T31_ | 23.22509 | -4.53761 | -1.3941  | 0.235289 | 0.427788 | DOWN | 279.2015 | 279.199  |
| 3494 | M525T32_ | 2.892613 | -1.53237 | -1.37567 | 0.235317 | 0.427793 | DOWN | 525.1215 | 525.1214 |
| 3495 | M481T26  | 6.166314 | 2.624408 | 1.368158 | 0.235337 | 0.427797 | UP   | 480.9099 | 480.9096 |
| 3496 | M371T10_ | 1.863093 | 0.8977   | 1.29624  | 0.235432 | 0.427815 | UP   | 371.3066 | 371.3055 |
| 3497 | M338T32_ | 2.592515 | 1.374352 | 1.29008  | 0.235453 | 0.427819 | UP   | 337.6059 | 337.6056 |
| 3498 | M499T32_ | 3.141516 | 1.651461 | 1.351666 | 0.235532 | 0.427833 | UP   | 499.4036 | 499.4032 |
| 3499 | M534T9   | 2.975017 | 1.572898 | 1.353235 | 0.235572 | 0.427841 | UP   | 534.349  | 534.3471 |
| 3500 | M234T14  | 2.172899 | -1.11962 | -1.34531 | 0.235676 | 0.42786  | DOWN | 234.0465 | 234.0463 |
| 3501 | M327T15  | 1.851752 | 0.888891 | 1.284762 | 0.235755 | 0.427875 | UP   | 327.2363 | 327.2358 |
| 3502 | M453T9_5 | 2.007839 | -1.00564 | -1.31765 | 0.235811 | 0.427885 | DOWN | 453.1228 | 453.1186 |
| 3503 | M821T34  | 2.771417 | 1.470624 | 1.337735 | 0.23585  | 0.427892 | UP   | 820.6004 | 820.599  |
| 3504 | M485T34_ | 2.379547 | 1.250687 | 1.309861 | 0.235989 | 0.427918 | UP   | 485.3557 | 485.3521 |
| 3505 | M332T9_4 | 9.647747 | 3.270192 | 1.383935 | 0.235995 | 0.427919 | UP   | 331.8516 | 331.8512 |
| 3506 | M772T22  | 14.48578 | -3.85656 | -1.39167 | 0.236096 | 0.427937 | DOWN | 772.3569 | 772.3562 |
| 3507 | M409T23  | 2.910037 | 1.541037 | 1.361009 | 0.236241 | 0.427964 | UP   | 409.1753 | 409.1746 |
| 3508 | M270T13_ | 2.045997 | 1.032804 | 1.283306 | 0.236319 | 0.427978 | UP   | 270.0256 | 270.0251 |
| 3509 | M460T22_ | 1.952386 | 0.965238 | 1.283613 | 0.236366 | 0.427987 | UP   | 460.3425 | 460.342  |
| 3510 | M506T9   | 1.781324 | 0.83295  | 1.330206 | 0.236387 | 0.427991 | UP   | 506.2544 | 506.2529 |
| 3511 | M410T31  | 12.60008 | 3.655361 | 1.387622 | 0.236451 | 0.428002 | UP   | 410.0819 | 410.0818 |
| 3512 | M364T15  | 5.131217 | 2.359301 | 1.388092 | 0.236477 | 0.428007 | UP   | 364.2022 | 364.2021 |
| 3513 | M229T26  | 3.871626 | -1.95294 | -1.37469 | 0.236601 | 0.42803  | DOWN | 229.1951 | 229.1949 |
| 3514 | M703T10_ | 3.332738 | 1.736708 | 1.336756 | 0.236834 | 0.428073 | UP   | 702.9405 | 702.9399 |
| 3515 | M455T13_ | 24.27559 | 4.601435 | 1.389683 | 0.236927 | 0.42809  | UP   | 455.2294 | 455.229  |
| 3516 | M317T30_ | 3.184912 | -1.67125 | -1.37046 | 0.236966 | 0.428097 | DOWN | 317.1149 | 317.1146 |
| 3517 | M754T29  | 2.35945  | -1.23845 | -1.31752 | 0.23703  | 0.428109 | DOWN | 754.1815 | 754.1804 |
| 3518 | M564T22_ | 7.646984 | 2.934891 | 1.38805  | 0.237054 | 0.428113 | UP   | 564.2509 | 564.2507 |
| 3519 | M357T14  | 20.03914 | 4.324749 | 1.388432 | 0.237282 | 0.428154 | UP   | 357.1544 | 357.1541 |
| 3520 | M533T22  | 8.935488 | 3.159547 | 1.387524 | 0.237387 | 0.428174 | UP   | 533.3207 | 533.3204 |
| 3521 | M312T31  | 2.361526 | 1.23972  | 1.305234 | 0.237431 | 0.428182 | UP   | 312.0295 | 312.0294 |
| 3522 | M278T28_ | 3.436701 | -1.78102 | -1.36428 | 0.237437 | 0.428183 | DOWN | 278.269  | 278.2688 |
| 3523 | M312T11  | 1.769103 | 0.823018 | 1.276327 | 0.237643 | 0.42822  | UP   | 312.2172 | 312.2167 |
| 3524 | M445T20  | 2.656566 | 1.409562 | 1.3039   | 0.237644 | 0.428221 | UP   | 445.3176 | 445.317  |

|      |          |          |          |          |          |          |      |          |          |
|------|----------|----------|----------|----------|----------|----------|------|----------|----------|
| 3525 | M403T10_ | 2.128082 | 1.089554 | 1.27769  | 0.237677 | 0.428226 | UP   | 403.2707 | 403.2689 |
| 3526 | M441T37  | 2.365474 | 1.242129 | 1.358458 | 0.237722 | 0.428235 | UP   | 441.1613 | 441.1612 |
| 3527 | M219T31  | 3.383002 | 1.758304 | 1.365595 | 0.237729 | 0.428236 | UP   | 219.1744 | 219.1742 |
| 3528 | M622T32_ | 2.45419  | 1.295247 | 1.293365 | 0.237774 | 0.428244 | UP   | 622.281  | 622.2798 |
| 3529 | M470T9_1 | 2.39312  | -1.25889 | -1.34423 | 0.237841 | 0.428256 | DOWN | 470.3416 | 470.3413 |
| 3530 | M552T34_ | 2.203218 | 1.139613 | 1.298722 | 0.237945 | 0.428275 | UP   | 551.8969 | 551.8962 |
| 3531 | M366T38  | 1.927108 | 0.946437 | 1.293429 | 0.238166 | 0.428315 | UP   | 366.1922 | 366.192  |
| 3532 | M349T10_ | 5.282613 | 2.401252 | 1.369892 | 0.238339 | 0.428346 | UP   | 349.1677 | 349.1675 |
| 3533 | M866T34  | 2.912611 | 1.542313 | 1.33437  | 0.238361 | 0.42835  | UP   | 865.6303 | 865.6287 |
| 3534 | M954T34  | 2.965603 | 1.568325 | 1.329166 | 0.23842  | 0.428361 | UP   | 953.6831 | 953.6812 |
| 3535 | M346T31_ | 2.249496 | 1.169602 | 1.371326 | 0.238438 | 0.428364 | UP   | 345.6041 | 345.6034 |
| 3536 | M344T16  | 2.05356  | 1.038127 | 1.335273 | 0.238547 | 0.428384 | UP   | 344.1919 | 344.1915 |
| 3537 | M552T26  | 2.083631 | -1.0591  | -1.32593 | 0.238608 | 0.428395 | DOWN | 552.2604 | 552.2592 |
| 3538 | M271T23  | 2.428741 | 1.280209 | 1.318684 | 0.238702 | 0.428412 | UP   | 271.2826 | 271.2823 |
| 3539 | M1132T10 | 2.24859  | 1.16902  | 1.272863 | 0.238947 | 0.428456 | UP   | 1131.851 | 1131.847 |
| 3540 | M566T29  | 3.259946 | -1.70485 | -1.35634 | 0.238996 | 0.428465 | DOWN | 566.3221 | 566.3211 |
| 3541 | M746T10  | 3.448025 | 1.78577  | 1.320322 | 0.239118 | 0.428487 | UP   | 746.4657 | 746.4649 |
| 3542 | M285T28  | 3.475405 | -1.79718 | -1.37635 | 0.239121 | 0.428488 | DOWN | 285.1824 | 285.1824 |
| 3543 | M631T38  | 1.928751 | 0.947667 | 1.30224  | 0.239235 | 0.428508 | UP   | 631.4506 | 631.4492 |
| 3544 | M469T39_ | 2.438871 | 1.286213 | 1.313049 | 0.239261 | 0.428513 | UP   | 468.8453 | 468.845  |
| 3545 | M216T10_ | 9.579277 | 3.259917 | 1.37177  | 0.239332 | 0.428525 | UP   | 215.5108 | 215.5107 |
| 3546 | M649T34_ | 2.928656 | 1.550239 | 1.356859 | 0.239414 | 0.42854  | UP   | 649.4497 | 649.4489 |
| 3547 | M436T31  | 2.384915 | 1.253938 | 1.350285 | 0.239419 | 0.428541 | UP   | 435.5257 | 435.5255 |
| 3548 | M521T32  | 2.344083 | 1.229024 | 1.306648 | 0.239465 | 0.428549 | UP   | 520.9707 | 520.9704 |
| 3549 | M630T32_ | 5.686305 | 2.507491 | 1.371187 | 0.239599 | 0.428573 | UP   | 630.4795 | 630.4787 |
| 3550 | M777T34  | 2.701654 | 1.433843 | 1.323278 | 0.239627 | 0.428578 | UP   | 776.5741 | 776.5726 |
| 3551 | M486T34_ | 2.369364 | 1.2445   | 1.302619 | 0.239665 | 0.428585 | UP   | 485.8573 | 485.8566 |
| 3552 | M200T22_ | 2.436542 | 1.284835 | 1.346436 | 0.2397   | 0.428591 | UP   | 200.2374 | 200.2373 |
| 3553 | M305T2   | 2.813743 | 1.49249  | 1.369802 | 0.240053 | 0.428654 | UP   | 304.8913 | 304.8909 |
| 3554 | M369T31  | 8.72926  | 3.125859 | 1.371004 | 0.240178 | 0.428677 | UP   | 369.0553 | 369.0552 |
| 3555 | M534T22  | 1.366773 | 0.450774 | 1.274754 | 0.240251 | 0.42869  | UP   | 534.2552 | 534.2547 |
| 3556 | M442T34_ | 2.238758 | 1.162698 | 1.306794 | 0.240417 | 0.428719 | UP   | 442.3328 | 442.3321 |
| 3557 | M492T26_ | 2.499621 | 1.32171  | 1.277435 | 0.240453 | 0.428726 | UP   | 491.9421 | 491.9411 |
| 3558 | M435T41  | 1.933163 | 0.950963 | 1.288958 | 0.240515 | 0.428737 | UP   | 435.368  | 435.367  |
| 3559 | M331T9_1 | 14.03245 | 3.810695 | 1.372969 | 0.240519 | 0.428738 | UP   | 330.5082 | 330.5078 |
| 3560 | M600T10  | 2.86621  | 1.519144 | 1.354108 | 0.240524 | 0.428738 | UP   | 600.4213 | 600.4202 |
| 3561 | M732T11  | 2.021528 | 1.015446 | 1.268718 | 0.240704 | 0.428771 | UP   | 732.1483 | 732.1464 |
| 3562 | M484T9_1 | 2.539019 | -1.34427 | -1.32528 | 0.240769 | 0.428782 | DOWN | 483.6461 | 483.6459 |
| 3563 | M614T36  | 1.804982 | 0.851985 | 1.267193 | 0.240861 | 0.428798 | UP   | 614.4842 | 614.4835 |
| 3564 | M375T10  | 3.323126 | 1.732541 | 1.315624 | 0.241013 | 0.428825 | UP   | 374.6648 | 374.6643 |
| 3565 | M865T34  | 2.794967 | 1.482831 | 1.320266 | 0.241156 | 0.428851 | UP   | 864.6268 | 864.6251 |
| 3566 | M170T9   | 3.908085 | 1.966462 | 1.34981  | 0.241174 | 0.428854 | UP   | 170.0048 | 170.0041 |
| 3567 | M357T38  | 2.852667 | 1.512312 | 1.367731 | 0.241368 | 0.428888 | UP   | 357.2402 | 357.2401 |
| 3568 | M643T43  | 1.437046 | 0.523106 | 1.308576 | 0.24139  | 0.428892 | UP   | 642.5153 | 642.5151 |
| 3569 | M392T18_ | 2.523786 | -1.33559 | -1.36489 | 0.241536 | 0.428918 | DOWN | 392.1773 | 392.1769 |
| 3570 | M543T39  | 2.698664 | 1.432245 | 1.322347 | 0.241578 | 0.428925 | UP   | 543.3976 | 543.3967 |
| 3571 | M714T43  | 1.187488 | 0.247913 | 1.309376 | 0.241767 | 0.428959 | UP   | 713.5124 | 713.511  |

|      |          |          |          |          |          |          |      |          |          |
|------|----------|----------|----------|----------|----------|----------|------|----------|----------|
| 3572 | M336T18  | 9.309769 | 3.218745 | 1.371403 | 0.24197  | 0.428994 | UP   | 336.2076 | 336.2072 |
| 3573 | M292T29_ | 2.624517 | -1.39205 | -1.364   | 0.241976 | 0.428995 | DOWN | 291.6301 | 291.6297 |
| 3574 | M591T29  | 3.958129 | -1.98482 | -1.35187 | 0.242069 | 0.429012 | DOWN | 591.3255 | 591.3245 |
| 3575 | M549T44_ | 1.191553 | 0.252843 | 1.30051  | 0.242233 | 0.429041 | UP   | 548.8998 | 548.899  |
| 3576 | M283T39  | 1.878017 | -0.90921 | -1.32214 | 0.242241 | 0.429042 | DOWN | 283.2826 | 283.2824 |
| 3577 | M481T32_ | 3.328028 | 1.734667 | 1.329558 | 0.242271 | 0.429047 | UP   | 481.3736 | 481.3732 |
| 3578 | M702T28  | 2.692523 | 1.428958 | 1.295726 | 0.242483 | 0.429085 | UP   | 702.1436 | 702.1426 |
| 3579 | M332T13  | 11.92913 | 3.576417 | 1.369874 | 0.242528 | 0.429092 | UP   | 332.159  | 332.1588 |
| 3580 | M768T10  | 3.470335 | 1.795075 | 1.311517 | 0.242568 | 0.429099 | UP   | 768.4793 | 768.4783 |
| 3581 | M455T30  | 2.259869 | 1.176239 | 1.297362 | 0.242613 | 0.429107 | UP   | 455.3713 | 455.3707 |
| 3582 | M249T31  | 2.256145 | 1.17386  | 1.310547 | 0.242664 | 0.429116 | UP   | 248.9483 | 248.9481 |
| 3583 | M584T23_ | 3.635729 | -1.86224 | -1.36409 | 0.242819 | 0.429143 | DOWN | 583.9433 | 583.9428 |
| 3584 | M636T32  | 1.659217 | -0.7305  | -1.26608 | 0.242829 | 0.429145 | DOWN | 636.399  | 636.3988 |
| 3585 | M911T34  | 3.151982 | 1.656259 | 1.317968 | 0.242946 | 0.429166 | UP   | 910.6596 | 910.6581 |
| 3586 | M567T29  | 3.233373 | -1.69304 | -1.34495 | 0.242982 | 0.429172 | DOWN | 567.3254 | 567.3246 |
| 3587 | M909T34  | 2.902579 | 1.537335 | 1.318528 | 0.243092 | 0.429191 | UP   | 908.6531 | 908.6512 |
| 3588 | M469T11_ | 5.215758 | 2.382877 | 1.33746  | 0.243209 | 0.429211 | UP   | 468.6932 | 468.6926 |
| 3589 | M408T13  | 11.07526 | 3.469268 | 1.366309 | 0.243241 | 0.429217 | UP   | 408.2283 | 408.2282 |
| 3590 | M507T34  | 2.213382 | 1.146252 | 1.281874 | 0.243352 | 0.429236 | UP   | 507.3689 | 507.368  |
| 3591 | M252T16  | 2.301487 | 1.202566 | 1.299602 | 0.243473 | 0.429258 | UP   | 252.2325 | 252.2322 |
| 3592 | M597T31_ | 2.508577 | 1.326869 | 1.271667 | 0.243492 | 0.429261 | UP   | 596.9443 | 596.9441 |
| 3593 | M827T10_ | 3.884832 | 1.957852 | 1.305184 | 0.243514 | 0.429265 | UP   | 826.5904 | 826.5903 |
| 3594 | M244T22  | 2.132529 | 1.092565 | 1.2982   | 0.243683 | 0.429294 | UP   | 244.2638 | 244.263  |
| 3595 | M337T28_ | 1.882227 | 0.912441 | 1.261086 | 0.243712 | 0.429299 | UP   | 336.5949 | 336.5943 |
| 3596 | M376T17_ | 10.54185 | -3.39806 | -1.36561 | 0.243731 | 0.429302 | DOWN | 376.2123 | 376.2119 |
| 3597 | M530T30_ | 2.817893 | -1.49462 | -1.31971 | 0.243843 | 0.429322 | DOWN | 530.322  | 530.3211 |
| 3598 | M420T21  | 62.91318 | -5.97529 | -1.3643  | 0.244182 | 0.429381 | DOWN | 420.1108 | 420.1106 |
| 3599 | M396T37  | 1.676971 | -0.74586 | -1.29398 | 0.244297 | 0.4294   | DOWN | 396.1678 | 396.1674 |
| 3600 | M497T10  | 3.468175 | 1.794177 | 1.295812 | 0.244306 | 0.429402 | UP   | 497.3844 | 497.3836 |
| 3601 | M302T28  | 1.389314 | -0.47437 | -1.31893 | 0.244348 | 0.429409 | DOWN | 302.2327 | 302.2324 |
| 3602 | M418T28  | 2.409603 | 1.268795 | 1.269496 | 0.24438  | 0.429415 | UP   | 418.1312 | 418.1311 |
| 3603 | M672T10_ | 3.807729 | 1.928931 | 1.326163 | 0.244393 | 0.429417 | UP   | 672.4111 | 672.4078 |
| 3604 | M498T9_2 | 1.850864 | -0.8882  | -1.25935 | 0.2444   | 0.429418 | DOWN | 498.4014 | 498.4002 |
| 3605 | M399T23  | 3.597229 | -1.84689 | -1.33327 | 0.244465 | 0.429429 | DOWN | 399.0918 | 399.0913 |
| 3606 | M321T25_ | 5.278247 | -2.40006 | -1.35737 | 0.244528 | 0.42944  | DOWN | 321.2466 | 321.2459 |
| 3607 | M455T39  | 3.030538 | 1.599574 | 1.331683 | 0.244538 | 0.429442 | UP   | 455.3449 | 455.3443 |
| 3608 | M378T31_ | 1.755637 | -0.81199 | -1.28465 | 0.244877 | 0.429501 | DOWN | 378.2635 | 378.2633 |
| 3609 | M997T34  | 3.043478 | 1.605721 | 1.310847 | 0.245013 | 0.429524 | UP   | 996.7058 | 996.7043 |
| 3610 | M623T32  | 2.353588 | 1.234862 | 1.264505 | 0.245098 | 0.429539 | UP   | 623.2846 | 623.2841 |
| 3611 | M728T29_ | 2.678843 | -1.42161 | -1.32235 | 0.24512  | 0.429542 | DOWN | 728.1839 | 728.1827 |
| 3612 | M781T30  | 3.444901 | -1.78446 | -1.31062 | 0.245197 | 0.429556 | DOWN | 781.1991 | 781.1989 |
| 3613 | M414T19_ | 7.929902 | -2.9873  | -1.35946 | 0.245284 | 0.429571 | DOWN | 414.186  | 414.1857 |
| 3614 | M562T29  | 2.676759 | 1.420487 | 1.302519 | 0.245417 | 0.429593 | UP   | 561.9059 | 561.905  |
| 3615 | M362T37  | 1.261312 | 0.334925 | 1.275929 | 0.24543  | 0.429596 | UP   | 362.3692 | 362.3683 |
| 3616 | M216T10_ | 11.26665 | 3.493987 | 1.353638 | 0.245509 | 0.429609 | UP   | 215.6898 | 215.6897 |
| 3617 | M606T32  | 3.778177 | -1.91769 | -1.33698 | 0.245522 | 0.429611 | DOWN | 606.308  | 606.3071 |
| 3618 | M592T30  | 3.555702 | -1.83013 | -1.34156 | 0.245695 | 0.429641 | DOWN | 592.3376 | 592.3371 |

|      |          |          |          |          |          |          |      |          |          |
|------|----------|----------|----------|----------|----------|----------|------|----------|----------|
| 3619 | M511T33_ | 1.743622 | -0.80209 | -1.30388 | 0.245699 | 0.429642 | DOWN | 511.3584 | 511.3578 |
| 3620 | M464T34_ | 2.350216 | 1.232793 | 1.280964 | 0.245795 | 0.429658 | UP   | 463.8444 | 463.8436 |
| 3621 | M778T34  | 2.744479 | 1.456532 | 1.306019 | 0.245896 | 0.429676 | UP   | 777.5775 | 777.576  |
| 3622 | M387T10_ | 1.804707 | 0.851764 | 1.254079 | 0.245923 | 0.42968  | UP   | 387.2492 | 387.248  |
| 3623 | M207T23  | 1.995951 | 0.997076 | 1.28437  | 0.245991 | 0.429692 | UP   | 207.0046 | 207.0045 |
| 3624 | M473T13  | 2.516875 | 1.331633 | 1.257834 | 0.24603  | 0.429698 | UP   | 472.869  | 472.8689 |
| 3625 | M556T31  | 15.932   | 3.993855 | 1.354652 | 0.246032 | 0.429699 | UP   | 556.0123 | 556.0119 |
| 3626 | M401T10_ | 2.233015 | 1.158993 | 1.259776 | 0.24604  | 0.4297   | UP   | 401.1504 | 401.1446 |
| 3627 | M445T26_ | 5.189157 | 2.3755   | 1.323299 | 0.246078 | 0.429707 | UP   | 445.028  | 445.0279 |
| 3628 | M289T26_ | 2.738986 | 1.453642 | 1.252156 | 0.246137 | 0.429717 | UP   | 288.6134 | 288.6132 |
| 3629 | M290T32_ | 2.150694 | 1.104802 | 1.252065 | 0.24627  | 0.429739 | UP   | 289.6414 | 289.641  |
| 3630 | M234T24  | 4.20013  | -2.07043 | -1.34884 | 0.246312 | 0.429747 | DOWN | 234.1619 | 234.1616 |
| 3631 | M343T22_ | 2.203101 | 1.139536 | 1.324979 | 0.246349 | 0.429753 | UP   | 343.1532 | 343.1529 |
| 3632 | M561T22_ | 4.234881 | -2.08232 | -1.34335 | 0.246356 | 0.429754 | DOWN | 561.1612 | 561.1602 |
| 3633 | M476T9_2 | 17.72201 | 4.14747  | 1.354061 | 0.246386 | 0.429759 | UP   | 476.1308 | 476.1303 |
| 3634 | M331T9_2 | 11.41798 | 3.513235 | 1.352396 | 0.246397 | 0.429761 | UP   | 330.6681 | 330.6678 |
| 3635 | M867T34  | 2.855466 | 1.513726 | 1.301497 | 0.246755 | 0.429822 | UP   | 866.6332 | 866.6318 |
| 3636 | M486T34_ | 2.060779 | 1.04319  | 1.271473 | 0.246763 | 0.429823 | UP   | 486.3589 | 486.3582 |
| 3637 | M279T29  | 1.335627 | 0.417517 | 1.299701 | 0.246825 | 0.429834 | UP   | 279.2322 | 279.232  |
| 3638 | M474T30  | 1.31122  | 0.39091  | 1.286333 | 0.246998 | 0.429863 | UP   | 473.8287 | 473.8276 |
| 3639 | M338T16_ | 6.559688 | 2.713627 | 1.352672 | 0.247011 | 0.429865 | UP   | 338.1867 | 338.1865 |
| 3640 | M616T19  | 1.755694 | 0.812042 | 1.266698 | 0.247042 | 0.429871 | UP   | 616.4638 | 616.4624 |
| 3641 | M529T24_ | 10.53442 | 3.397038 | 1.353717 | 0.247049 | 0.429872 | UP   | 529.3261 | 529.3258 |
| 3642 | M324T9_4 | 3.792827 | 1.923274 | 1.288029 | 0.247065 | 0.429874 | UP   | 324.3154 | 324.3151 |
| 3643 | M564T27  | 2.784898 | -1.47762 | -1.32554 | 0.247132 | 0.429886 | DOWN | 564.3067 | 564.306  |
| 3644 | M318T17  | 1.431902 | -0.51793 | -1.29869 | 0.247199 | 0.429897 | DOWN | 318.2066 | 318.2063 |
| 3645 | M340T18_ | 2.29575  | 1.198966 | 1.275136 | 0.247411 | 0.429933 | UP   | 340.1156 | 340.1151 |
| 3646 | M334T10_ | 8.231847 | 3.041216 | 1.343086 | 0.247591 | 0.429963 | UP   | 333.6104 | 333.6097 |
| 3647 | M173T9_5 | 3.413236 | 1.77114  | 1.305202 | 0.247619 | 0.429968 | UP   | 173.3902 | 173.3836 |
| 3648 | M357T27  | 2.060872 | -1.04325 | -1.30905 | 0.24769  | 0.42998  | DOWN | 357.1118 | 357.1115 |
| 3649 | M434T29  | 2.832166 | 1.501906 | 1.315156 | 0.247745 | 0.429989 | UP   | 434.363  | 434.3626 |
| 3650 | M730T22  | 24.98153 | -4.64279 | -1.35139 | 0.247788 | 0.429997 | DOWN | 730.3353 | 730.334  |
| 3651 | M309T35  | 1.743918 | -0.80233 | -1.28599 | 0.247835 | 0.430005 | DOWN | 309.3266 | 309.326  |
| 3652 | M464T9_1 | 3.951606 | 1.982439 | 1.297123 | 0.247957 | 0.430025 | UP   | 464.2049 | 464.2039 |
| 3653 | M906T10  | 2.124734 | 1.087282 | 1.248014 | 0.248001 | 0.430033 | UP   | 905.6822 | 905.6782 |
| 3654 | M500T39  | 2.693999 | 1.429749 | 1.299842 | 0.248031 | 0.430038 | UP   | 499.8731 | 499.8728 |
| 3655 | M631T40  | 5.647968 | 2.497732 | 1.348379 | 0.248133 | 0.430055 | UP   | 630.5062 | 630.5042 |
| 3656 | M265T13  | 3.749075 | 1.906535 | 1.334281 | 0.248224 | 0.43007  | UP   | 265.2357 | 265.2354 |
| 3657 | M656T9_2 | 13.11139 | 3.712748 | 1.347187 | 0.248267 | 0.430077 | UP   | 656.0165 | 656.016  |
| 3658 | M478T9_6 | 31.97179 | 4.998728 | 1.348861 | 0.248449 | 0.430108 | UP   | 478.489  | 478.4883 |
| 3659 | M735T9_2 | 7.66798  | 2.938847 | 1.340075 | 0.248451 | 0.430108 | UP   | 735.0715 | 735.0711 |
| 3660 | M1006T9_ | 4.317134 | 2.110074 | 1.332752 | 0.248635 | 0.430139 | UP   | 1005.608 | 1005.606 |
| 3661 | M520T11  | 2.130817 | 1.091406 | 1.252545 | 0.248708 | 0.430151 | UP   | 520.3943 | 520.3935 |
| 3662 | M160T17  | 2.885958 | 1.52905  | 1.26886  | 0.249006 | 0.430201 | UP   | 159.5248 | 159.5247 |
| 3663 | M679T9   | 14.81289 | 3.888781 | 1.3457   | 0.249029 | 0.430205 | UP   | 678.5022 | 678.4996 |
| 3664 | M283T4   | 17.04305 | -4.09111 | -1.34748 | 0.249051 | 0.430209 | DOWN | 283.0698 | 283.0697 |
| 3665 | M500T12  | 145.3118 | 7.183008 | 1.347386 | 0.249118 | 0.43022  | UP   | 500.2376 | 500.2371 |

|      |          |          |          |          |          |          |      |          |          |
|------|----------|----------|----------|----------|----------|----------|------|----------|----------|
| 3666 | M532T31_ | 1.687844 | 0.755181 | 1.313842 | 0.249359 | 0.43026  | UP   | 532.2564 | 532.2563 |
| 3667 | M220T13  | 4.141607 | 2.050191 | 1.332659 | 0.249619 | 0.430304 | UP   | 220.1779 | 220.1776 |
| 3668 | M866T42_ | 1.450342 | 0.536393 | 1.243544 | 0.249633 | 0.430306 | UP   | 865.5979 | 865.5977 |
| 3669 | M716T44  | 1.42354  | 0.509483 | 1.24277  | 0.24966  | 0.43031  | UP   | 716.3531 | 716.3516 |
| 3670 | M369T10_ | 3.0953   | 1.630079 | 1.287362 | 0.249792 | 0.430332 | UP   | 368.7217 | 368.7205 |
| 3671 | M265T31  | 1.676994 | 0.745877 | 1.28967  | 0.249823 | 0.430337 | UP   | 265.1953 | 265.1952 |
| 3672 | M733T34  | 2.655906 | 1.409204 | 1.291522 | 0.249954 | 0.430359 | UP   | 732.5477 | 732.5463 |
| 3673 | M288T18_ | 2.06436  | 1.045695 | 1.248147 | 0.250038 | 0.430373 | UP   | 287.8892 | 287.8885 |
| 3674 | M823T34  | 2.898637 | 1.535375 | 1.297503 | 0.250082 | 0.43038  | UP   | 822.6068 | 822.6057 |
| 3675 | M574T34_ | 2.120316 | 1.084279 | 1.256673 | 0.250183 | 0.430397 | UP   | 573.9102 | 573.9091 |
| 3676 | M626T22  | 3.656653 | -1.87052 | -1.33478 | 0.2503   | 0.430416 | DOWN | 626.2659 | 626.2644 |
| 3677 | M485T10_ | 2.272278 | 1.184139 | 1.260614 | 0.250332 | 0.430422 | UP   | 485.3412 | 485.3401 |
| 3678 | M487T26  | 2.619384 | 1.389228 | 1.259965 | 0.250354 | 0.430426 | UP   | 487.0831 | 487.0824 |
| 3679 | M236T24  | 4.144529 | -2.05121 | -1.33347 | 0.250376 | 0.430429 | DOWN | 236.1591 | 236.1589 |
| 3680 | M307T17_ | 1.962122 | 0.972415 | 1.251926 | 0.250512 | 0.430452 | UP   | 307.0492 | 307.0491 |
| 3681 | M805T10  | 4.826395 | 2.270946 | 1.315213 | 0.250521 | 0.430453 | UP   | 804.9917 | 804.9909 |
| 3682 | M499T23_ | 9.619632 | 3.265982 | 1.342054 | 0.250576 | 0.430462 | UP   | 499.1878 | 499.1877 |
| 3683 | M1852T10 | 16.81174 | 4.071397 | 1.339053 | 0.250718 | 0.430486 | UP   | 1852.1   | 1852.1   |
| 3684 | M166T23_ | 2.40298  | 1.264824 | 1.311062 | 0.250773 | 0.430495 | UP   | 165.978  | 165.978  |
| 3685 | M292T22  | 2.70303  | 1.434578 | 1.280586 | 0.250846 | 0.430507 | UP   | 292.0751 | 292.0751 |
| 3686 | M485T32  | 2.172982 | 1.119676 | 1.287688 | 0.250851 | 0.430508 | UP   | 485.0879 | 485.0874 |
| 3687 | M686T9_1 | 3.113255 | 1.638424 | 1.305891 | 0.250861 | 0.430509 | UP   | 685.7506 | 685.7494 |
| 3688 | M441T10_ | 2.877201 | 1.524666 | 1.261481 | 0.250906 | 0.430517 | UP   | 441.1693 | 441.1678 |
| 3689 | M465T16  | 2.560364 | 1.356349 | 1.237568 | 0.251002 | 0.430533 | UP   | 464.908  | 464.9079 |
| 3690 | M413T31_ | 1.720051 | 0.782452 | 1.257041 | 0.251025 | 0.430536 | UP   | 412.8073 | 412.8066 |
| 3691 | M942T41  | 1.752549 | -0.80946 | -1.2554  | 0.251041 | 0.430539 | DOWN | 942.4911 | 942.4897 |
| 3692 | M587T32  | 5.564752 | 2.476317 | 1.330151 | 0.251069 | 0.430543 | UP   | 587.4559 | 587.4558 |
| 3693 | M667T22  | 5.15446  | -2.36582 | -1.33486 | 0.251077 | 0.430545 | DOWN | 667.2929 | 667.292  |
| 3694 | M305T26  | 2.596787 | 1.376728 | 1.245009 | 0.251099 | 0.430548 | UP   | 305.0874 | 305.0873 |
| 3695 | M564T28_ | 2.754747 | 1.46192  | 1.246087 | 0.251114 | 0.430551 | UP   | 564.0614 | 564.0613 |
| 3696 | M597T24_ | 2.542643 | 1.346329 | 1.245428 | 0.251216 | 0.430568 | UP   | 597.1193 | 597.1191 |
| 3697 | M264T13  | 3.111834 | 1.637765 | 1.312986 | 0.251457 | 0.430607 | UP   | 264.2324 | 264.2319 |
| 3698 | M778T30  | 2.305109 | -1.20483 | -1.27342 | 0.251525 | 0.430618 | DOWN | 778.1999 | 778.1993 |
| 3699 | M1010T9_ | 6.844945 | 2.775039 | 1.317931 | 0.251618 | 0.430634 | UP   | 1010.496 | 1010.493 |
| 3700 | M867T41  | 2.092325 | 1.065107 | 1.263014 | 0.251774 | 0.430659 | UP   | 867.1894 | 867.1882 |
| 3701 | M469T31  | 3.125395 | 1.644039 | 1.312471 | 0.251877 | 0.430676 | UP   | 469.387  | 469.3864 |
| 3702 | M470T31  | 3.409763 | 1.769671 | 1.317595 | 0.252123 | 0.430716 | UP   | 470.39   | 470.3897 |
| 3703 | M412T34  | 1.886095 | 0.915402 | 1.234168 | 0.252181 | 0.430726 | UP   | 411.8025 | 411.8016 |
| 3704 | M657T9_2 | 12.59053 | 3.654268 | 1.331735 | 0.252184 | 0.430726 | UP   | 656.9131 | 656.9122 |
| 3705 | M465T9_4 | 3.019115 | 1.594126 | 1.311138 | 0.252344 | 0.430753 | UP   | 465.3374 | 465.3365 |
| 3706 | M781T31  | 445.2902 | 8.798602 | 1.336461 | 0.252354 | 0.430754 | UP   | 781.2629 | 781.2623 |
| 3707 | M594T22_ | 2.432626 | 1.282515 | 1.307579 | 0.252416 | 0.430764 | UP   | 594.2822 | 594.2819 |
| 3708 | M550T33  | 1.833603 | 0.874681 | 1.233368 | 0.252453 | 0.43077  | UP   | 550.0474 | 550.0467 |
| 3709 | M593T44_ | 1.173955 | 0.231377 | 1.232906 | 0.252614 | 0.430796 | UP   | 592.9264 | 592.9254 |
| 3710 | M237T12  | 3.38676  | 1.759906 | 1.323612 | 0.252707 | 0.430812 | UP   | 237.1136 | 237.1136 |
| 3711 | M365T19  | 3.634579 | -1.86179 | -1.32879 | 0.252848 | 0.430835 | DOWN | 365.1712 | 365.1707 |
| 3712 | M299T32  | 1.50516  | -0.58992 | -1.31913 | 0.252876 | 0.430839 | DOWN | 299.0792 | 299.0789 |

|      |          |          |          |          |          |          |      |          |          |
|------|----------|----------|----------|----------|----------|----------|------|----------|----------|
| 3713 | M504T28_ | 1.822319 | 0.865775 | 1.236888 | 0.252898 | 0.430843 | UP   | 503.8868 | 503.8859 |
| 3714 | M187T32  | 1.710851 | -0.77471 | -1.33096 | 0.252926 | 0.430847 | DOWN | 187.0753 | 187.0752 |
| 3715 | M734T10  | 3.124657 | 1.643698 | 1.262318 | 0.25295  | 0.430851 | UP   | 734.4369 | 734.4368 |
| 3716 | M468T31  | 2.94089  | 1.556253 | 1.304617 | 0.252974 | 0.430855 | UP   | 468.3835 | 468.3827 |
| 3717 | M470T9_2 | 1.962764 | -0.97289 | -1.26888 | 0.252978 | 0.430856 | DOWN | 470.3708 | 470.3685 |
| 3718 | M374T14  | 2.270447 | 1.182976 | 1.232447 | 0.253022 | 0.430863 | UP   | 373.9834 | 373.9832 |
| 3719 | M576T32  | 2.273678 | 1.185028 | 1.240233 | 0.253031 | 0.430864 | UP   | 576.2752 | 576.2741 |
| 3720 | M415T11  | 1.986191 | 0.990005 | 1.233267 | 0.253128 | 0.43088  | UP   | 415.2804 | 415.2801 |
| 3721 | M590T29_ | 3.629714 | -1.85986 | -1.31894 | 0.253135 | 0.430881 | DOWN | 590.3221 | 590.3212 |
| 3722 | M565T39_ | 1.95329  | 0.965906 | 1.262991 | 0.253141 | 0.430882 | UP   | 565.4109 | 565.4098 |
| 3723 | M526T22_ | 1.80567  | -0.85253 | -1.2416  | 0.253304 | 0.430909 | DOWN | 526.2764 | 526.2761 |
| 3724 | M410T32  | 2.359838 | 1.238688 | 1.261164 | 0.253405 | 0.430925 | UP   | 410.3477 | 410.347  |
| 3725 | M302T30  | 3.291594 | -1.71879 | -1.31678 | 0.253436 | 0.43093  | DOWN | 302.1445 | 302.1442 |
| 3726 | M697T31  | 2.33341  | 1.22244  | 1.258361 | 0.25352  | 0.430944 | UP   | 697.193  | 697.1926 |
| 3727 | M1105T11 | 2.13381  | 1.093431 | 1.235732 | 0.253563 | 0.43095  | UP   | 1104.665 | 1104.663 |
| 3728 | M938T39  | 3.587629 | 1.843031 | 1.297432 | 0.253673 | 0.430968 | UP   | 937.6878 | 937.6875 |
| 3729 | M411T31  | 8.30987  | 3.054826 | 1.331356 | 0.253755 | 0.430982 | UP   | 411.1202 | 411.1198 |
| 3730 | M703T28  | 3.254159 | 1.702285 | 1.288921 | 0.253991 | 0.43102  | UP   | 703.1468 | 703.1462 |
| 3731 | M413T10_ | 2.941768 | 1.556683 | 1.258806 | 0.254015 | 0.431024 | UP   | 413.2963 | 413.288  |
| 3732 | M444T31  | 2.58246  | 1.368746 | 1.323533 | 0.254054 | 0.43103  | UP   | 444.2344 | 444.2338 |
| 3733 | M298T27_ | 2.277113 | 1.187206 | 1.237639 | 0.254158 | 0.431047 | UP   | 297.6279 | 297.6277 |
| 3734 | M410T28_ | 2.239927 | 1.163452 | 1.254285 | 0.254169 | 0.431048 | UP   | 410.3117 | 410.3115 |
| 3735 | M735T34  | 2.990985 | 1.580621 | 1.291026 | 0.254203 | 0.431054 | UP   | 734.5541 | 734.5529 |
| 3736 | M411T34_ | 2.290396 | 1.195597 | 1.252829 | 0.254218 | 0.431056 | UP   | 410.8033 | 410.8023 |
| 3737 | M290T15  | 2.043076 | 1.030743 | 1.248575 | 0.25444  | 0.431092 | UP   | 290.2482 | 290.2479 |
| 3738 | M291T29_ | 2.101244 | 1.071244 | 1.244976 | 0.25453  | 0.431106 | UP   | 291.1296 | 291.1295 |
| 3739 | M372T25  | 1.54677  | -0.62926 | -1.25484 | 0.254715 | 0.431136 | DOWN | 372.3303 | 372.3301 |
| 3740 | M339T30  | 1.762512 | -0.81763 | -1.2602  | 0.254795 | 0.431149 | DOWN | 339.3008 | 339.3004 |
| 3741 | M302T29_ | 2.279865 | 1.188949 | 1.226556 | 0.25487  | 0.431161 | UP   | 302.1329 | 302.1328 |
| 3742 | M754T30_ | 1.165841 | 0.221371 | 1.233978 | 0.254958 | 0.431175 | UP   | 753.5198 | 753.5184 |
| 3743 | M283T26_ | 2.212609 | 1.145748 | 1.226321 | 0.254969 | 0.431177 | UP   | 282.6328 | 282.6326 |
| 3744 | M368T10_ | 10.12054 | 3.339215 | 1.320614 | 0.25501  | 0.431183 | UP   | 368.4169 | 368.4165 |
| 3745 | M542T29_ | 3.715379 | -1.89351 | -1.3084  | 0.255179 | 0.43121  | DOWN | 542.3219 | 542.3212 |
| 3746 | M379T19_ | 1.950819 | 0.96408  | 1.273904 | 0.255245 | 0.431221 | UP   | 379.187  | 379.1859 |
| 3747 | M415T19_ | 3.076407 | 1.621246 | 1.284332 | 0.255279 | 0.431226 | UP   | 415.0874 | 415.0873 |
| 3748 | M755T10_ | 10.2636  | 3.359464 | 1.31875  | 0.255439 | 0.431252 | UP   | 754.6472 | 754.647  |
| 3749 | M517T26  | 2.550389 | 1.350717 | 1.22493  | 0.255443 | 0.431253 | UP   | 517.0609 | 517.0608 |
| 3750 | M392T23  | 1.348773 | -0.43165 | -1.24608 | 0.255567 | 0.431272 | DOWN | 392.3164 | 392.3161 |
| 3751 | M499T39  | 2.495869 | 1.319542 | 1.283106 | 0.255573 | 0.431273 | UP   | 499.3715 | 499.371  |
| 3752 | M292T16  | 3.898591 | 1.962953 | 1.308021 | 0.255742 | 0.4313   | UP   | 292.264  | 292.2634 |
| 3753 | M556T11  | 3.589583 | 1.843816 | 1.269294 | 0.256264 | 0.431383 | UP   | 556.1688 | 556.1684 |
| 3754 | M336T13  | 7.0599   | 2.819648 | 1.322224 | 0.256304 | 0.43139  | UP   | 336.2075 | 336.2072 |
| 3755 | M402T10_ | 2.01702  | 1.012225 | 1.223948 | 0.256313 | 0.431391 | UP   | 402.2677 | 402.2664 |
| 3756 | M332T12  | 8.336707 | 3.059478 | 1.322398 | 0.256455 | 0.431414 | UP   | 332.1783 | 332.1781 |
| 3757 | M318T30_ | 3.663934 | -1.87339 | -1.30859 | 0.256513 | 0.431423 | DOWN | 317.6364 | 317.6364 |
| 3758 | M470T17  | 3.137993 | 1.649842 | 1.245208 | 0.256587 | 0.431435 | UP   | 469.9552 | 469.9549 |
| 3759 | M636T40  | 1.861982 | 0.896839 | 1.221373 | 0.256715 | 0.431455 | UP   | 636.4792 | 636.4786 |



|      |          |          |          |          |          |          |      |          |          |
|------|----------|----------|----------|----------|----------|----------|------|----------|----------|
| 3760 | M344T20  | 1.628177 | 0.703257 | 1.229321 | 0.256745 | 0.431459 | UP   | 344.2992 | 344.2984 |
| 3761 | M731T22  | 24.20506 | -4.59724 | -1.32141 | 0.256815 | 0.431471 | DOWN | 731.3386 | 731.3374 |
| 3762 | M1133T10 | 2.182951 | 1.12628  | 1.221334 | 0.256841 | 0.431475 | UP   | 1132.855 | 1132.852 |
| 3763 | M992T31  | 4.551126 | -2.18622 | -1.30128 | 0.256856 | 0.431477 | DOWN | 991.6733 | 991.6713 |
| 3764 | M791T36  | 1.750811 | 0.808023 | 1.228997 | 0.256898 | 0.431484 | UP   | 790.5898 | 790.589  |
| 3765 | M323T25_ | 1.831157 | 0.872755 | 1.221382 | 0.256936 | 0.43149  | UP   | 323.2418 | 323.2412 |
| 3766 | M313T13  | 1.924056 | 0.944151 | 1.221205 | 0.256941 | 0.43149  | UP   | 313.2358 | 313.2349 |
| 3767 | M182T22  | 1.582796 | 0.662475 | 1.235032 | 0.25698  | 0.431497 | UP   | 182.0391 | 182.039  |
| 3768 | M332T22_ | 2.466269 | 1.30233  | 1.241656 | 0.257186 | 0.431529 | UP   | 332.0985 | 332.0983 |
| 3769 | M315T25  | 1.412517 | -0.49827 | -1.23451 | 0.257261 | 0.431541 | DOWN | 315.093  | 315.0928 |
| 3770 | M1848T9  | 22.71686 | 4.505691 | 1.318446 | 0.257304 | 0.431548 | UP   | 1847.872 | 1847.871 |
| 3771 | M325T37  | 1.69765  | -0.76354 | -1.22768 | 0.257336 | 0.431553 | DOWN | 325.3215 | 325.3209 |
| 3772 | M609T38  | 2.041403 | 1.029561 | 1.260255 | 0.257393 | 0.431562 | UP   | 609.4372 | 609.436  |
| 3773 | M779T10_ | 54.25824 | 5.76177  | 1.319606 | 0.257421 | 0.431566 | UP   | 779.4    | 779.3993 |
| 3774 | M442T9_2 | 2.399319 | -1.26262 | -1.26168 | 0.257469 | 0.431574 | DOWN | 442.2898 | 442.2891 |
| 3775 | M636T26  | 3.027869 | 1.598303 | 1.268688 | 0.257506 | 0.43158  | UP   | 636.1073 | 636.1069 |
| 3776 | M510T17  | 3.4818   | 1.799833 | 1.246262 | 0.257567 | 0.431589 | UP   | 509.978  | 509.9777 |
| 3777 | M530T34_ | 2.180567 | 1.124704 | 1.240245 | 0.257643 | 0.431601 | UP   | 529.8837 | 529.8828 |
| 3778 | M452T41  | 2.207751 | 1.142577 | 1.283792 | 0.25771  | 0.431612 | UP   | 452.3946 | 452.3936 |
| 3779 | M340T24_ | 1.888729 | 0.917416 | 1.27576  | 0.257757 | 0.431619 | UP   | 340.2203 | 340.2202 |
| 3780 | M777T29  | 2.427341 | -1.27938 | -1.28204 | 0.257786 | 0.431623 | DOWN | 777.1882 | 777.1859 |
| 3781 | M835T45  | 1.204772 | 0.26876  | 1.21876  | 0.257804 | 0.431626 | UP   | 834.6429 | 834.6413 |
| 3782 | M332T10_ | 3.070309 | 1.618384 | 1.287247 | 0.257826 | 0.43163  | UP   | 332.2585 | 332.2579 |
| 3783 | M411T32_ | 2.421727 | 1.276037 | 1.244276 | 0.257852 | 0.431634 | UP   | 411.351  | 411.3509 |
| 3784 | M640T33_ | 2.036749 | 1.026268 | 1.233048 | 0.257872 | 0.431637 | UP   | 639.9501 | 639.949  |
| 3785 | M703T34  | 1.930868 | 0.94925  | 1.221243 | 0.257952 | 0.43165  | UP   | 702.5371 | 702.5362 |
| 3786 | M203T13  | 3.438241 | 1.78167  | 1.308433 | 0.258014 | 0.431659 | UP   | 203.1432 | 203.1429 |
| 3787 | M583T9   | 6.356252 | -2.66818 | -1.30927 | 0.258036 | 0.431663 | DOWN | 583.3765 | 583.3763 |
| 3788 | M463T23  | 3.095277 | -1.63007 | -1.29849 | 0.258129 | 0.431677 | DOWN | 463.0337 | 463.0329 |
| 3789 | M247T26  | 2.343623 | -1.22874 | -1.26243 | 0.258406 | 0.431721 | DOWN | 247.2059 | 247.2056 |
| 3790 | M386T43  | 1.363163 | -0.44696 | -1.22374 | 0.258425 | 0.431724 | DOWN | 386.3993 | 386.3984 |
| 3791 | M779T34  | 2.777799 | 1.473942 | 1.270128 | 0.258581 | 0.431748 | UP   | 778.5806 | 778.5793 |
| 3792 | M383T33_ | 3.9698   | -1.98907 | -1.30733 | 0.258581 | 0.431748 | DOWN | 383.1218 | 383.1216 |
| 3793 | M687T19  | 36.70465 | -5.19789 | -1.31558 | 0.258585 | 0.431749 | DOWN | 687.3288 | 687.3273 |
| 3794 | M480T20_ | 2.213736 | 1.146483 | 1.238434 | 0.258587 | 0.431749 | UP   | 480.4076 | 480.4072 |
| 3795 | M737T9_2 | 16.80713 | 4.071002 | 1.313745 | 0.258692 | 0.431765 | UP   | 737.2659 | 737.2651 |
| 3796 | M734T34  | 2.679565 | 1.421999 | 1.266259 | 0.258718 | 0.431769 | UP   | 733.5512 | 733.5497 |
| 3797 | M388T10_ | 4.480844 | 2.16377  | 1.291406 | 0.25878  | 0.431779 | UP   | 387.7211 | 387.7202 |
| 3798 | M270T23  | 2.307294 | 1.206202 | 1.25868  | 0.258893 | 0.431797 | UP   | 270.2792 | 270.2787 |
| 3799 | M734T29  | 5.933497 | 2.568883 | 1.300628 | 0.258994 | 0.431812 | UP   | 734.1617 | 734.1608 |
| 3800 | M419T21_ | 1.302502 | -0.38129 | -1.21721 | 0.258996 | 0.431813 | DOWN | 419.2906 | 419.2904 |
| 3801 | M419T27_ | 3.061244 | 1.614118 | 1.307079 | 0.259041 | 0.43182  | UP   | 419.2044 | 419.2043 |
| 3802 | M401T10_ | 2.851581 | -1.51176 | -1.21688 | 0.259127 | 0.431833 | DOWN | 401.2968 | 401.2946 |
| 3803 | M456T35  | 2.939802 | 1.555719 | 1.287231 | 0.259131 | 0.431834 | UP   | 456.4047 | 456.4045 |
| 3804 | M426T24_ | 1.37882  | -0.46343 | -1.21529 | 0.259138 | 0.431835 | DOWN | 426.194  | 426.1939 |
| 3805 | M412T19_ | 9.988678 | -3.32029 | -1.31228 | 0.259264 | 0.431854 | DOWN | 412.1889 | 412.1883 |
| 3806 | M667T10  | 2.478613 | 1.309533 | 1.215416 | 0.259269 | 0.431855 | UP   | 667.3378 | 667.3356 |

|      |          |          |          |          |          |          |      |          |          |
|------|----------|----------|----------|----------|----------|----------|------|----------|----------|
| 3807 | M539T12_ | 1.929853 | 0.948491 | 1.214512 | 0.259301 | 0.43186  | UP   | 539.4042 | 539.404  |
| 3808 | M634T9_2 | 4.231085 | 2.081028 | 1.26355  | 0.259402 | 0.431876 | UP   | 634.2595 | 634.2579 |
| 3809 | M396T32_ | 244.7087 | 7.934922 | 1.312328 | 0.259647 | 0.431914 | UP   | 395.8899 | 395.8898 |
| 3810 | M955T34  | 3.377604 | 1.756    | 1.276009 | 0.259665 | 0.431917 | UP   | 954.6859 | 954.6847 |
| 3811 | M677T9_2 | 5.426387 | 2.439992 | 1.308115 | 0.259668 | 0.431917 | UP   | 677.4987 | 677.4953 |
| 3812 | M280T12  | 2.923662 | 1.547776 | 1.273399 | 0.259733 | 0.431927 | UP   | 280.2274 | 280.2272 |
| 3813 | M616T10_ | 7.447032 | 2.896666 | 1.299148 | 0.259764 | 0.431932 | UP   | 615.9284 | 615.9277 |
| 3814 | M263T9_2 | 14.40046 | 3.848043 | 1.308108 | 0.25977  | 0.431933 | UP   | 263.3478 | 263.3475 |
| 3815 | M581T20  | 2.192368 | 1.13249  | 1.216632 | 0.259816 | 0.43194  | UP   | 581.425  | 581.4242 |
| 3816 | M415T9   | 3.224443 | -1.68905 | -1.27906 | 0.259883 | 0.43195  | DOWN | 415.2537 | 415.2534 |
| 3817 | M263T9_1 | 14.64201 | 3.872042 | 1.30809  | 0.259909 | 0.431954 | UP   | 262.98   | 262.9798 |
| 3818 | M953T34  | 2.844864 | 1.50836  | 1.265163 | 0.259921 | 0.431956 | UP   | 952.6794 | 952.677  |
| 3819 | M833T11  | 2.729611 | -1.4487  | -1.26439 | 0.259976 | 0.431965 | DOWN | 833.3472 | 833.3449 |
| 3820 | M344T27_ | 12.25597 | -3.61541 | -1.30891 | 0.260058 | 0.431977 | DOWN | 344.3161 | 344.3157 |
| 3821 | M1041T34 | 2.986163 | 1.578293 | 1.260185 | 0.260155 | 0.431992 | UP   | 1040.732 | 1040.73  |
| 3822 | M783T10_ | 4.498202 | 2.169349 | 1.284589 | 0.26021  | 0.432001 | UP   | 782.978  | 782.9751 |
| 3823 | M603T44  | 1.198107 | 0.260757 | 1.22327  | 0.260246 | 0.432006 | UP   | 602.9443 | 602.9433 |
| 3824 | M341T9_2 | 6.126125 | 2.614975 | 1.296413 | 0.260289 | 0.432013 | UP   | 341.1162 | 341.1156 |
| 3825 | M388T24  | 10.86847 | 3.442078 | 1.309214 | 0.260303 | 0.432015 | UP   | 388.1783 | 388.1776 |
| 3826 | M616T10_ | 1.879733 | 0.910527 | 1.212908 | 0.260507 | 0.432047 | UP   | 616.4274 | 616.4264 |
| 3827 | M1761T9  | 12.21265 | 3.610305 | 1.305051 | 0.260526 | 0.43205  | UP   | 1761.085 | 1761.084 |
| 3828 | M163T13  | 5.157478 | 2.366666 | 1.303508 | 0.26059  | 0.432059 | UP   | 163.0754 | 163.0751 |
| 3829 | M373T14_ | 2.351373 | 1.233504 | 1.242391 | 0.260631 | 0.432066 | UP   | 373.2853 | 373.285  |
| 3830 | M668T10  | 2.486071 | 1.313868 | 1.211292 | 0.260636 | 0.432066 | UP   | 668.3412 | 668.3402 |
| 3831 | M566T39  | 2.144682 | 1.100764 | 1.246023 | 0.260727 | 0.432081 | UP   | 565.9127 | 565.9121 |
| 3832 | M366T10_ | 9.977442 | 3.31867  | 1.300774 | 0.260925 | 0.432111 | UP   | 366.0298 | 366.0295 |
| 3833 | M227T21_ | 14.97866 | 3.904837 | 1.30813  | 0.260928 | 0.432111 | UP   | 227.0639 | 227.0638 |
| 3834 | M1084T9  | 5.748288 | 2.523132 | 1.281872 | 0.261015 | 0.432125 | UP   | 1084.424 | 1084.422 |
| 3835 | M782T10_ | 4.711479 | 2.23618  | 1.292645 | 0.261046 | 0.432129 | UP   | 782.4767 | 782.4764 |
| 3836 | M360T37_ | 1.131866 | 0.178703 | 1.21762  | 0.26105  | 0.43213  | UP   | 360.3624 | 360.362  |
| 3837 | M774T28  | 4.126052 | 2.044762 | 1.269582 | 0.261239 | 0.432159 | UP   | 774.0741 | 774.0729 |
| 3838 | M653T9_1 | 13.67254 | 3.77321  | 1.302976 | 0.26129  | 0.432167 | UP   | 652.6771 | 652.6765 |
| 3839 | M577T10_ | 3.918699 | 1.970375 | 1.286053 | 0.261363 | 0.432178 | UP   | 577.0315 | 577.0305 |
| 3840 | M479T22_ | 3.866956 | -1.9512  | -1.29363 | 0.261408 | 0.432185 | DOWN | 479.108  | 479.1068 |
| 3841 | M517T22_ | 1.877918 | 0.909134 | 1.218553 | 0.261514 | 0.432201 | UP   | 516.9423 | 516.9418 |
| 3842 | M553T34_ | 2.01527  | 1.010973 | 1.218137 | 0.261534 | 0.432204 | UP   | 553.4447 | 553.4438 |
| 3843 | M1005T9  | 6.42099  | 2.682796 | 1.285033 | 0.261672 | 0.432225 | UP   | 1004.598 | 1004.596 |
| 3844 | M278T26_ | 2.305764 | 1.205245 | 1.251094 | 0.261775 | 0.432241 | UP   | 278.104  | 278.1034 |
| 3845 | M756T10_ | 8.949259 | 3.161768 | 1.296706 | 0.26179  | 0.432243 | UP   | 756.304  | 756.3036 |
| 3846 | M798T30  | 1.214796 | 0.280714 | 1.258815 | 0.26186  | 0.432254 | UP   | 797.546  | 797.5448 |
| 3847 | M298T21  | 3.357902 | -1.74756 | -1.29312 | 0.262258 | 0.432315 | DOWN | 298.2381 | 298.2379 |
| 3848 | M432T25_ | 3.040264 | -1.6042  | -1.29341 | 0.262392 | 0.432335 | DOWN | 432.168  | 432.1679 |
| 3849 | M404T26_ | 5.666296 | 2.502406 | 1.277585 | 0.262537 | 0.432357 | UP   | 404.0016 | 404.0012 |
| 3850 | M702T6   | 17.85669 | -4.15839 | -1.30134 | 0.26258  | 0.432364 | DOWN | 702.4973 | 702.4964 |
| 3851 | M425T45  | 1.145343 | 0.195779 | 1.21827  | 0.262787 | 0.432395 | UP   | 425.3345 | 425.3338 |
| 3852 | M425T10_ | 2.986016 | 1.578222 | 1.259807 | 0.262852 | 0.432405 | UP   | 424.847  | 424.8463 |
| 3853 | M434T38  | 1.375406 | 0.459857 | 1.278667 | 0.262882 | 0.432409 | UP   | 434.1706 | 434.1705 |

|      |          |          |          |          |          |          |      |          |          |
|------|----------|----------|----------|----------|----------|----------|------|----------|----------|
| 3854 | M408T11_ | 10.4625  | 3.387156 | 1.300926 | 0.2629   | 0.432412 | UP   | 408.2286 | 408.2282 |
| 3855 | M282T9_2 | 17.11158 | 4.096901 | 1.299242 | 0.262967 | 0.432422 | UP   | 281.5755 | 281.5751 |
| 3856 | M350T9_1 | 6.627078 | 2.728373 | 1.294333 | 0.262976 | 0.432424 | UP   | 350.4516 | 350.4513 |
| 3857 | M736T34  | 2.820574 | 1.495989 | 1.254971 | 0.263001 | 0.432427 | UP   | 735.5567 | 735.5559 |
| 3858 | M499T9_2 | 19.03002 | 4.250205 | 1.298361 | 0.263342 | 0.432479 | UP   | 498.9936 | 498.9934 |
| 3859 | M937T39  | 3.223421 | 1.688593 | 1.265289 | 0.263376 | 0.432484 | UP   | 936.6842 | 936.6832 |
| 3860 | M331T9_3 | 7.117245 | 2.831319 | 1.283404 | 0.263542 | 0.432509 | UP   | 330.8284 | 330.8283 |
| 3861 | M760T10_ | 6.68518  | 2.740966 | 1.288431 | 0.263566 | 0.432513 | UP   | 760.4497 | 760.4492 |
| 3862 | M458T9_3 | 21.24016 | 4.408723 | 1.297678 | 0.263695 | 0.432532 | UP   | 458.0143 | 458.0142 |
| 3863 | M219T16_ | 2.936311 | 1.554005 | 1.257155 | 0.263699 | 0.432533 | UP   | 219.1746 | 219.1745 |
| 3864 | M216T10_ | 8.63566  | 3.110306 | 1.297324 | 0.263721 | 0.432536 | UP   | 215.9427 | 215.9427 |
| 3865 | M442T10_ | 2.180689 | 1.124784 | 1.219995 | 0.263772 | 0.432544 | UP   | 442.3473 | 442.346  |
| 3866 | M325T38  | 1.349643 | 0.432578 | 1.274955 | 0.263878 | 0.43256  | UP   | 325.1657 | 325.1656 |
| 3867 | M261T18  | 2.262839 | 1.178134 | 1.211913 | 0.263888 | 0.432561 | UP   | 260.5818 | 260.5817 |
| 3868 | M543T29  | 4.245596 | -2.08597 | -1.28785 | 0.263962 | 0.432573 | DOWN | 543.3251 | 543.3248 |
| 3869 | M416T22  | 1.489173 | -0.57451 | -1.22963 | 0.264101 | 0.432593 | DOWN | 416.0091 | 416.0019 |
| 3870 | M653T9_3 | 12.81338 | 3.679579 | 1.293396 | 0.264143 | 0.4326   | UP   | 653.1221 | 653.1215 |
| 3871 | M332T9_2 | 8.964547 | 3.164231 | 1.289969 | 0.26417  | 0.432604 | UP   | 331.6506 | 331.6502 |
| 3872 | M480T26_ | 2.566926 | 1.360042 | 1.228302 | 0.264234 | 0.432613 | UP   | 480.1065 | 480.1063 |
| 3873 | M1667T10 | 11.89523 | 3.572311 | 1.292615 | 0.264282 | 0.432621 | UP   | 1667.219 | 1667.216 |
| 3874 | M1086T34 | 4.46454  | 2.158512 | 1.270451 | 0.2643   | 0.432623 | UP   | 1085.762 | 1085.761 |
| 3875 | M280T24  | 2.277716 | -1.18759 | -1.27534 | 0.264321 | 0.432626 | DOWN | 280.1757 | 280.1755 |
| 3876 | M476T9_1 | 16.34961 | 4.031184 | 1.29442  | 0.264429 | 0.432643 | UP   | 475.9768 | 475.9765 |
| 3877 | M571T44_ | 1.166119 | 0.221715 | 1.200377 | 0.264547 | 0.43266  | UP   | 570.9131 | 570.9121 |
| 3878 | M433T39  | 2.669125 | 1.416367 | 1.283434 | 0.26456  | 0.432662 | UP   | 433.3322 | 433.332  |
| 3879 | M277T11_ | 1.651101 | 0.723428 | 1.220225 | 0.264642 | 0.432675 | UP   | 277.1283 | 277.1282 |
| 3880 | M302T29_ | 2.056671 | 1.040311 | 1.20452  | 0.264694 | 0.432682 | UP   | 301.6312 | 301.6308 |
| 3881 | M1090T9  | 6.545529 | 2.71051  | 1.275453 | 0.264744 | 0.43269  | UP   | 1089.972 | 1089.972 |
| 3882 | M500T9   | 17.97235 | 4.167707 | 1.293807 | 0.264784 | 0.432696 | UP   | 499.7892 | 499.7891 |
| 3883 | M727T11_ | 1.963388 | 0.973345 | 1.199161 | 0.264786 | 0.432696 | UP   | 727.4343 | 727.4316 |
| 3884 | M507T23_ | 3.124361 | 1.643561 | 1.236324 | 0.26496  | 0.432722 | UP   | 507.0362 | 507.0361 |
| 3885 | M554T28_ | 1.581825 | 0.66159  | 1.212149 | 0.265008 | 0.432729 | UP   | 554.3969 | 554.3958 |
| 3886 | M701T40  | 1.681931 | 0.750118 | 1.20014  | 0.265215 | 0.43276  | UP   | 700.5212 | 700.5204 |
| 3887 | M384T22_ | 2.011684 | 1.008404 | 1.202377 | 0.265284 | 0.43277  | UP   | 384.1797 | 384.1793 |
| 3888 | M275T28_ | 2.337453 | 1.224937 | 1.202072 | 0.265288 | 0.432771 | UP   | 275.0367 | 275.0366 |
| 3889 | M814T31  | 2.318312 | 1.213075 | 1.226377 | 0.265299 | 0.432773 | UP   | 814.1258 | 814.1256 |
| 3890 | M417T9   | 1.705682 | -0.77035 | -1.23587 | 0.265341 | 0.432779 | DOWN | 417.3229 | 417.3218 |
| 3891 | M323T17_ | 17.56136 | 4.134333 | 1.293513 | 0.265438 | 0.432793 | UP   | 322.9709 | 322.9701 |
| 3892 | M677T9_1 | 4.612574 | 2.205572 | 1.256547 | 0.265546 | 0.432809 | UP   | 676.8028 | 676.8025 |
| 3893 | M466T20_ | 2.445213 | -1.28996 | -1.25657 | 0.265699 | 0.432832 | DOWN | 466.1754 | 466.1741 |
| 3894 | M373T32_ | 2.387176 | 1.255305 | 1.199273 | 0.265755 | 0.43284  | UP   | 373.131  | 373.1305 |
| 3895 | M423T22_ | 3.082333 | 1.624023 | 1.235216 | 0.265849 | 0.432855 | UP   | 423.0044 | 423.0043 |
| 3896 | M332T9_1 | 9.91273  | 3.309282 | 1.284765 | 0.265861 | 0.432856 | UP   | 331.51   | 331.5097 |
| 3897 | M282T22  | 1.835148 | 0.875897 | 1.196423 | 0.265907 | 0.432863 | UP   | 282.1028 | 282.1027 |
| 3898 | M637T10_ | 2.877192 | 1.524661 | 1.232278 | 0.265949 | 0.432869 | UP   | 636.5065 | 636.5052 |
| 3899 | M493T26_ | 2.344678 | 1.22939  | 1.229389 | 0.265973 | 0.432873 | UP   | 492.9393 | 492.9391 |
| 3900 | M218T22_ | 1.88736  | 0.916369 | 1.282163 | 0.266024 | 0.43288  | UP   | 218.0602 | 218.06   |

|      |          |          |          |          |          |          |      |          |          |
|------|----------|----------|----------|----------|----------|----------|------|----------|----------|
| 3901 | M615T17  | 1.880821 | 0.911362 | 1.203635 | 0.266147 | 0.432899 | UP   | 615.0292 | 615.0281 |
| 3902 | M266T26_ | 3.418553 | -1.77339 | -1.27879 | 0.266181 | 0.432904 | DOWN | 266.2197 | 266.2192 |
| 3903 | M397T32_ | 445.0004 | 8.797663 | 1.290937 | 0.266282 | 0.432919 | UP   | 396.8843 | 396.8838 |
| 3904 | M356T9   | 8.553536 | 3.096521 | 1.284909 | 0.266308 | 0.432922 | UP   | 356.4742 | 356.474  |
| 3905 | M458T21_ | 2.792102 | 1.481351 | 1.245205 | 0.26633  | 0.432926 | UP   | 458.1829 | 458.1822 |
| 3906 | M439T22  | 2.107937 | 1.075832 | 1.197266 | 0.266333 | 0.432926 | UP   | 439.0461 | 439.0454 |
| 3907 | M389T34_ | 2.176332 | 1.121899 | 1.218675 | 0.266337 | 0.432927 | UP   | 389.292  | 389.2915 |
| 3908 | M427T11  | 1.839442 | 0.879268 | 1.194687 | 0.266425 | 0.43294  | UP   | 427.3043 | 427.3034 |
| 3909 | M285T23_ | 2.090096 | 1.063569 | 1.201053 | 0.266494 | 0.43295  | UP   | 285.0318 | 285.0313 |
| 3910 | M339T32_ | 2.055957 | 1.03981  | 1.195512 | 0.266529 | 0.432955 | UP   | 339.1053 | 339.1052 |
| 3911 | M504T28_ | 1.79103  | 0.84079  | 1.20188  | 0.266557 | 0.432959 | UP   | 504.3885 | 504.3877 |
| 3912 | M279T28_ | 1.996686 | 0.997607 | 1.246324 | 0.266572 | 0.432962 | UP   | 279.1116 | 279.1113 |
| 3913 | M350T10_ | 10.80349 | 3.433425 | 1.28469  | 0.266649 | 0.432973 | UP   | 350.1022 | 350.1019 |
| 3914 | M564T24  | 4.328204 | 2.113768 | 1.286869 | 0.266682 | 0.432978 | UP   | 564.251  | 564.2506 |
| 3915 | M600T9   | 1.69089  | 0.757783 | 1.195819 | 0.266735 | 0.432986 | UP   | 600.4068 | 600.4053 |
| 3916 | M343T16_ | 2.501343 | 1.322703 | 1.193923 | 0.266789 | 0.432994 | UP   | 342.977  | 342.9769 |
| 3917 | M224T18_ | 1.709714 | -0.77375 | -1.26425 | 0.266792 | 0.432994 | DOWN | 224.0959 | 224.0955 |
| 3918 | M656T10_ | 8.748256 | 3.128995 | 1.279679 | 0.266845 | 0.433002 | UP   | 656.4643 | 656.4635 |
| 3919 | M527T44_ | 1.167742 | 0.223722 | 1.194563 | 0.266858 | 0.433004 | UP   | 527.3884 | 527.3875 |
| 3920 | M586T23  | 3.392745 | -1.76245 | -1.27809 | 0.266901 | 0.43301  | DOWN | 585.9422 | 585.942  |
| 3921 | M477T11_ | 2.618822 | 1.388918 | 1.196044 | 0.266966 | 0.43302  | UP   | 477.1582 | 477.1565 |
| 3922 | M521T27_ | 6.482859 | -2.69663 | -1.2856  | 0.267031 | 0.433029 | DOWN | 521.0844 | 521.0841 |
| 3923 | M341T10_ | 10.03844 | 3.327464 | 1.283806 | 0.267032 | 0.433029 | UP   | 341.4744 | 341.4736 |
| 3924 | M291T32  | 2.151928 | 1.10563  | 1.193171 | 0.267082 | 0.433037 | UP   | 290.6391 | 290.6387 |
| 3925 | M1676T10 | 10.76026 | 3.427641 | 1.281648 | 0.267117 | 0.433042 | UP   | 1675.945 | 1675.943 |
| 3926 | M621T30  | 1.152131 | 0.204304 | 1.192718 | 0.267153 | 0.433047 | UP   | 621.4408 | 621.4396 |
| 3927 | M660T9_2 | 2.881913 | 1.527027 | 1.223792 | 0.267193 | 0.433053 | UP   | 659.5482 | 659.5467 |
| 3928 | M347T17  | 3.137053 | 1.64941  | 1.228343 | 0.267209 | 0.433055 | UP   | 347.0904 | 347.0899 |
| 3929 | M387T22_ | 5.209589 | -2.38117 | -1.28505 | 0.267275 | 0.433065 | DOWN | 386.9831 | 386.9827 |
| 3930 | M442T9_1 | 2.260928 | -1.17692 | -1.21987 | 0.267324 | 0.433072 | DOWN | 441.7879 | 441.7875 |
| 3931 | M998T34  | 2.898221 | 1.535167 | 1.238867 | 0.267326 | 0.433073 | UP   | 997.7094 | 997.7077 |
| 3932 | M216T10_ | 11.63999 | 3.541018 | 1.283553 | 0.267393 | 0.433082 | UP   | 216.4546 | 216.4544 |
| 3933 | M535T23  | 2.759711 | 1.464517 | 1.219509 | 0.267399 | 0.433083 | UP   | 535.0312 | 535.0309 |
| 3934 | M696T31_ | 2.230503 | 1.157369 | 1.217577 | 0.267402 | 0.433084 | UP   | 696.1899 | 696.1886 |
| 3935 | M394T26_ | 1.849782 | 0.887356 | 1.200075 | 0.267481 | 0.433095 | UP   | 394.1468 | 394.1465 |
| 3936 | M324T14  | 9.09164  | 3.18454  | 1.284819 | 0.267727 | 0.433131 | UP   | 324.1983 | 324.198  |
| 3937 | M637T10_ | 2.85726  | 1.514632 | 1.195855 | 0.267744 | 0.433134 | UP   | 636.9668 | 636.9655 |
| 3938 | M445T31  | 2.810995 | 1.491081 | 1.218261 | 0.267894 | 0.433156 | UP   | 445.1948 | 445.1941 |
| 3939 | M499T29  | 3.45669  | 1.789391 | 1.236497 | 0.267951 | 0.433164 | UP   | 499.1987 | 499.1981 |
| 3940 | M331T11_ | 12.25758 | 3.615603 | 1.283795 | 0.26796  | 0.433166 | UP   | 331.1578 | 331.1574 |
| 3941 | M424T13_ | 9.20196  | -3.20194 | -1.28536 | 0.268005 | 0.433172 | DOWN | 424.1734 | 424.1727 |
| 3942 | M430T23_ | 2.100273 | 1.070577 | 1.218052 | 0.268026 | 0.433175 | UP   | 429.7834 | 429.7826 |
| 3943 | M342T13_ | 1.949902 | 0.963402 | 1.191908 | 0.268097 | 0.433186 | UP   | 342.269  | 342.2682 |
| 3944 | M391T22_ | 2.201312 | 1.138364 | 1.198857 | 0.268142 | 0.433192 | UP   | 391.1404 | 391.1402 |
| 3945 | M652T29_ | 1.937401 | -0.95412 | -1.21513 | 0.268151 | 0.433194 | DOWN | 652.2585 | 652.2585 |
| 3946 | M496T41  | 2.681177 | 1.422866 | 1.268142 | 0.268181 | 0.433198 | UP   | 496.4207 | 496.4197 |
| 3947 | M457T9_1 | 12.91552 | 3.691034 | 1.28046  | 0.268252 | 0.433208 | UP   | 456.5369 | 456.5366 |

|      |          |          |          |          |          |          |      |          |          |
|------|----------|----------|----------|----------|----------|----------|------|----------|----------|
| 3948 | M438T31  | 1.825523 | 0.86831  | 1.190021 | 0.26835  | 0.433223 | UP   | 438.1336 | 438.1336 |
| 3949 | M304T22_ | 1.928815 | 0.947715 | 1.190354 | 0.26848  | 0.433242 | UP   | 304.0972 | 304.0971 |
| 3950 | M338T10_ | 2.247339 | 1.168218 | 1.193116 | 0.268527 | 0.433248 | UP   | 338.4458 | 338.4449 |
| 3951 | M478T9_3 | 16.04064 | 4.003659 | 1.280739 | 0.268615 | 0.433261 | UP   | 477.8979 | 477.8972 |
| 3952 | M702T27  | 3.762897 | -1.91184 | -1.2747  | 0.268724 | 0.433277 | DOWN | 702.1682 | 702.1676 |
| 3953 | M422T21  | 1.376914 | 0.461438 | 1.194733 | 0.26878  | 0.433285 | UP   | 422.2365 | 422.2362 |
| 3954 | M703T9   | 7.337797 | 2.875347 | 1.280317 | 0.268844 | 0.433295 | UP   | 702.5467 | 702.5451 |
| 3955 | M622T17  | 1.596115 | 0.674564 | 1.187679 | 0.269025 | 0.433321 | UP   | 622.4897 | 622.4883 |
| 3956 | M1051T9  | 15.94719 | 3.99523  | 1.278976 | 0.26923  | 0.433351 | UP   | 1050.571 | 1050.57  |
| 3957 | M368T10_ | 34.11031 | 5.092136 | 1.281376 | 0.269246 | 0.433353 | UP   | 367.8221 | 367.8221 |
| 3958 | M437T22_ | 2.494654 | 1.31884  | 1.214707 | 0.269256 | 0.433354 | UP   | 437.3841 | 437.3831 |
| 3959 | M461T22_ | 1.754726 | 0.811246 | 1.189192 | 0.269496 | 0.433389 | UP   | 461.3459 | 461.3457 |
| 3960 | M159T22  | 1.702588 | 0.76773  | 1.187173 | 0.269535 | 0.433395 | UP   | 158.974  | 158.9736 |
| 3961 | M282T9_1 | 15.58049 | 3.961669 | 1.277744 | 0.269642 | 0.43341  | UP   | 281.5055 | 281.5052 |
| 3962 | M540T40  | 3.198272 | 1.677293 | 1.270123 | 0.269656 | 0.433412 | UP   | 540.4471 | 540.4459 |
| 3963 | M709T10_ | 2.60966  | 1.383862 | 1.2053   | 0.269665 | 0.433414 | UP   | 709.474  | 709.4712 |
| 3964 | M418T20  | 3.760539 | 1.91094  | 1.277869 | 0.26988  | 0.433445 | UP   | 418.2029 | 418.2026 |
| 3965 | M611T10_ | 8.963363 | 3.16404  | 1.271046 | 0.269959 | 0.433456 | UP   | 611.0576 | 611.0573 |
| 3966 | M465T9_3 | 6.119277 | 2.613361 | 1.256997 | 0.270204 | 0.433492 | UP   | 464.9188 | 464.9179 |
| 3967 | M375T12  | 1.602329 | 0.68017  | 1.184835 | 0.270217 | 0.433493 | UP   | 374.793  | 374.7927 |
| 3968 | M689T34  | 2.72668  | 1.447146 | 1.23675  | 0.270408 | 0.433521 | UP   | 688.5213 | 688.52   |
| 3969 | M658T10_ | 12.7583  | 3.673364 | 1.273179 | 0.270516 | 0.433536 | UP   | 657.8656 | 657.8646 |
| 3970 | M370T28_ | 1.968565 | 0.977144 | 1.200638 | 0.270559 | 0.433543 | UP   | 369.9337 | 369.933  |
| 3971 | M521T34  | 2.052844 | 1.037624 | 1.194513 | 0.270586 | 0.433546 | UP   | 520.8686 | 520.8683 |
| 3972 | M218T31  | 2.353009 | 1.234507 | 1.189944 | 0.270639 | 0.433554 | UP   | 217.99   | 217.9897 |
| 3973 | M703T10_ | 2.778439 | 1.474274 | 1.219717 | 0.270669 | 0.433558 | UP   | 703.4423 | 703.4419 |
| 3974 | M610T10_ | 2.130664 | 1.091303 | 1.19318  | 0.270795 | 0.433577 | UP   | 609.9074 | 609.9071 |
| 3975 | M622T9_2 | 3.602836 | 1.849133 | 1.247856 | 0.27082  | 0.43358  | UP   | 622.4023 | 622.402  |
| 3976 | M871T32  | 14.64047 | -3.87189 | -1.27631 | 0.270842 | 0.433583 | DOWN | 870.53   | 870.5279 |
| 3977 | M618T33_ | 1.981387 | 0.986511 | 1.195855 | 0.270853 | 0.433585 | UP   | 617.9366 | 617.9358 |
| 3978 | M1765T10 | 19.7392  | 4.302991 | 1.274609 | 0.270872 | 0.433588 | UP   | 1765.029 | 1765.029 |
| 3979 | M507T22  | 2.97475  | 1.572769 | 1.232121 | 0.270891 | 0.43359  | UP   | 506.9181 | 506.9177 |
| 3980 | M1085T34 | 3.224922 | 1.689264 | 1.232209 | 0.271034 | 0.433611 | UP   | 1084.758 | 1084.757 |
| 3981 | M321T10  | 5.583238 | 2.481102 | 1.261027 | 0.271053 | 0.433613 | UP   | 321.0458 | 321.0453 |
| 3982 | M314T29_ | 2.114412 | 1.080256 | 1.185342 | 0.27108  | 0.433617 | UP   | 313.6313 | 313.631  |
| 3983 | M375T23  | 5.214748 | 2.382598 | 1.266322 | 0.271136 | 0.433625 | UP   | 375.1293 | 375.1292 |
| 3984 | M461T44_ | 1.150014 | 0.201652 | 1.190574 | 0.27116  | 0.433629 | UP   | 461.3491 | 461.3484 |
| 3985 | M766T29_ | 1.663912 | 0.734579 | 1.182467 | 0.271183 | 0.433632 | UP   | 766.1693 | 766.1689 |
| 3986 | M536T22_ | 6.103912 | 2.609734 | 1.274305 | 0.271215 | 0.433637 | UP   | 536.3125 | 536.3121 |
| 3987 | M725T10  | 3.541312 | 1.824284 | 1.234164 | 0.271323 | 0.433652 | UP   | 724.9542 | 724.9535 |
| 3988 | M615T10_ | 7.027591 | 2.81303  | 1.25962  | 0.271537 | 0.433683 | UP   | 614.7107 | 614.7102 |
| 3989 | M219T22  | 2.70677  | -1.43657 | -1.26468 | 0.271575 | 0.433688 | DOWN | 219.1957 | 219.1953 |
| 3990 | M656T10_ | 11.31266 | 3.499866 | 1.268781 | 0.27161  | 0.433693 | UP   | 655.9622 | 655.9615 |
| 3991 | M387T33  | 2.369635 | 1.244665 | 1.184258 | 0.27185  | 0.433727 | UP   | 387.1466 | 387.1462 |
| 3992 | M408T20_ | 2.013744 | 1.009881 | 1.202346 | 0.271862 | 0.433729 | UP   | 408.1598 | 408.1589 |
| 3993 | M624T32_ | 19.89374 | -4.31424 | -1.27314 | 0.271907 | 0.433736 | DOWN | 624.2409 | 624.24   |
| 3994 | M633T10_ | 2.345563 | 1.229934 | 1.18642  | 0.271924 | 0.433738 | UP   | 633.4598 | 633.4574 |

|      |          |          |          |          |          |          |      |          |          |
|------|----------|----------|----------|----------|----------|----------|------|----------|----------|
| 3995 | M758T10_ | 8.750818 | 3.129418 | 1.264245 | 0.271984 | 0.433747 | UP   | 758.1757 | 758.1752 |
| 3996 | M849T39_ | 3.217157 | 1.685787 | 1.249798 | 0.272013 | 0.433751 | UP   | 848.6315 | 848.6299 |
| 3997 | M256T32  | 2.452362 | 1.294172 | 1.182603 | 0.272034 | 0.433754 | UP   | 256.0268 | 256.0266 |
| 3998 | M708T10_ | 2.179704 | 1.124132 | 1.183481 | 0.272304 | 0.433792 | UP   | 707.9325 | 707.931  |
| 3999 | M457T9_3 | 14.84429 | 3.891836 | 1.268875 | 0.272357 | 0.4338   | UP   | 457.0889 | 457.0886 |
| 4000 | M301T29_ | 2.012235 | 1.008799 | 1.180714 | 0.27238  | 0.433803 | UP   | 301.1352 | 301.1348 |
| 4001 | M1672T9  | 8.485512 | 3.085002 | 1.262208 | 0.272487 | 0.433818 | UP   | 1672.074 | 1672.071 |
| 4002 | M370T10_ | 2.146344 | 1.101881 | 1.178892 | 0.272492 | 0.433819 | UP   | 370.2423 | 370.241  |
| 4003 | M441T17  | 3.067333 | 1.616985 | 1.19399  | 0.272556 | 0.433828 | UP   | 440.9568 | 440.9567 |
| 4004 | M289T29_ | 2.074545 | 1.052795 | 1.183384 | 0.272636 | 0.433839 | UP   | 289.1351 | 289.1348 |
| 4005 | M245T23  | 1.961889 | 0.972244 | 1.195353 | 0.272787 | 0.433861 | UP   | 245.2669 | 245.2666 |
| 4006 | M705T9_3 | 10.87909 | 3.443486 | 1.265061 | 0.272792 | 0.433861 | UP   | 704.8542 | 704.8537 |
| 4007 | M760T10_ | 7.593832 | 2.924828 | 1.258353 | 0.272939 | 0.433882 | UP   | 760.1511 | 760.15   |
| 4008 | M537T11  | 3.170985 | 1.664931 | 1.243483 | 0.272948 | 0.433883 | UP   | 537.1675 | 537.1672 |
| 4009 | M664T30  | 1.170632 | 0.227288 | 1.176911 | 0.273065 | 0.4339   | UP   | 664.4636 | 664.4626 |
| 4010 | M784T9   | 3.526579 | 1.818269 | 1.222116 | 0.273111 | 0.433906 | UP   | 784.4925 | 784.4895 |
| 4011 | M1769T9  | 10.78526 | 3.430989 | 1.263225 | 0.273152 | 0.433912 | UP   | 1769.472 | 1769.469 |
| 4012 | M709T30_ | 2.976978 | 1.573848 | 1.200162 | 0.273186 | 0.433917 | UP   | 709.1939 | 709.1932 |
| 4013 | M658T34_ | 2.423596 | -1.27715 | -1.25651 | 0.2733   | 0.433933 | DOWN | 658.4898 | 658.4897 |
| 4014 | M520T22_ | 1.855444 | 0.891765 | 1.194737 | 0.27341  | 0.433949 | UP   | 519.9511 | 519.9503 |
| 4015 | M458T12  | 2.035133 | 1.025123 | 1.175978 | 0.273554 | 0.433969 | UP   | 458.3654 | 458.3645 |
| 4016 | M835T34  | 2.075437 | -1.05341 | -1.24996 | 0.273578 | 0.433972 | DOWN | 834.5798 | 834.5784 |
| 4017 | M1026T39 | 3.896417 | 1.962148 | 1.238322 | 0.273579 | 0.433972 | UP   | 1025.741 | 1025.738 |
| 4018 | M1774T10 | 11.2803  | 3.495733 | 1.262309 | 0.273582 | 0.433973 | UP   | 1773.686 | 1773.684 |
| 4019 | M776T42  | 1.67503  | 0.744187 | 1.205896 | 0.273651 | 0.433983 | UP   | 775.5986 | 775.5979 |
| 4020 | M226T16_ | 2.720386 | -1.44381 | -1.19757 | 0.273772 | 0.434    | DOWN | 226.1803 | 226.1803 |
| 4021 | M757T10_ | 7.702986 | 2.945418 | 1.256021 | 0.274004 | 0.434032 | UP   | 757.4813 | 757.4788 |
| 4022 | M348T31_ | 2.280816 | 1.18955  | 1.217323 | 0.274154 | 0.434053 | UP   | 348.1068 | 348.1064 |
| 4023 | M413T21_ | 8.022258 | 3.004008 | 1.264208 | 0.274209 | 0.434061 | UP   | 413.2305 | 413.2299 |
| 4024 | M582T23  | 2.624593 | -1.39209 | -1.25836 | 0.274227 | 0.434064 | DOWN | 581.9465 | 581.9454 |
| 4025 | M552T34_ | 1.964028 | 0.973815 | 1.180568 | 0.274247 | 0.434066 | UP   | 552.4414 | 552.4405 |
| 4026 | M737T9_1 | 9.179948 | 3.198486 | 1.257861 | 0.274316 | 0.434076 | UP   | 736.7324 | 736.7319 |
| 4027 | M709T9   | 9.626835 | 3.267061 | 1.257848 | 0.274413 | 0.43409  | UP   | 708.6017 | 708.601  |
| 4028 | M464T18_ | 2.096014 | 1.067648 | 1.173567 | 0.274472 | 0.434098 | UP   | 463.9115 | 463.9109 |
| 4029 | M457T9_5 | 9.504002 | 3.248535 | 1.260791 | 0.274479 | 0.434099 | UP   | 457.2336 | 457.2334 |
| 4030 | M684T33  | 2.259207 | 1.175817 | 1.199486 | 0.274491 | 0.434101 | UP   | 683.9763 | 683.9753 |
| 4031 | M538T12_ | 1.768472 | 0.822503 | 1.173697 | 0.274618 | 0.434118 | UP   | 538.3854 | 538.3843 |
| 4032 | M319T10  | 2.822092 | 1.496765 | 1.196564 | 0.274633 | 0.434121 | UP   | 318.7567 | 318.7562 |
| 4033 | M613T10_ | 7.164748 | 2.840916 | 1.252088 | 0.274695 | 0.434129 | UP   | 613.3437 | 613.3436 |
| 4034 | M400T16  | 2.714308 | 1.440584 | 1.180658 | 0.274729 | 0.434134 | UP   | 400.0145 | 400.0144 |
| 4035 | M772T10  | 5.46894  | 2.451261 | 1.252628 | 0.274772 | 0.43414  | UP   | 772.4108 | 772.4095 |
| 4036 | M267T18_ | 1.358714 | 0.442242 | 1.178482 | 0.27479  | 0.434142 | UP   | 267.2068 | 267.2064 |
| 4037 | M760T10_ | 6.85343  | 2.776826 | 1.248752 | 0.274838 | 0.434149 | UP   | 759.8441 | 759.8434 |
| 4038 | M652T9_1 | 11.00329 | 3.459863 | 1.259007 | 0.274886 | 0.434156 | UP   | 652.2331 | 652.2328 |
| 4039 | M372T33  | 1.485233 | -0.57069 | -1.17214 | 0.275056 | 0.43418  | DOWN | 372.3471 | 372.3467 |
| 4040 | M593T28  | 2.45079  | 1.293247 | 1.171595 | 0.275069 | 0.434181 | UP   | 593.0073 | 593.007  |
| 4041 | M499T30_ | 2.874848 | 1.523486 | 1.230666 | 0.275105 | 0.434186 | UP   | 499.3976 | 499.3971 |

|      |          |          |          |          |          |          |      |          |          |
|------|----------|----------|----------|----------|----------|----------|------|----------|----------|
| 4042 | M522T26_ | 2.741959 | -1.45521 | -1.25255 | 0.275191 | 0.434198 | DOWN | 522.2591 | 522.2585 |
| 4043 | M851T39  | 4.109923 | 2.039112 | 1.245376 | 0.275229 | 0.434204 | UP   | 850.6381 | 850.6369 |
| 4044 | M332T9_5 | 10.33709 | 3.369758 | 1.25743  | 0.275233 | 0.434204 | UP   | 331.9923 | 331.992  |
| 4045 | M417T23_ | 2.754965 | -1.46203 | -1.24499 | 0.275682 | 0.434267 | DOWN | 417.028  | 417.0272 |
| 4046 | M656T9_1 | 9.977038 | 3.318612 | 1.254227 | 0.275879 | 0.434294 | UP   | 655.5144 | 655.5137 |
| 4047 | M635T9   | 4.652476 | 2.217999 | 1.225061 | 0.275922 | 0.4343   | UP   | 634.7368 | 634.7358 |
| 4048 | M351T10_ | 8.73125  | 3.126188 | 1.251366 | 0.27596  | 0.434305 | UP   | 350.6257 | 350.6254 |
| 4049 | M595T33  | 1.989668 | 0.992528 | 1.181018 | 0.275968 | 0.434306 | UP   | 595.4217 | 595.4207 |
| 4050 | M478T9_1 | 13.74936 | 3.781293 | 1.257043 | 0.27603  | 0.434315 | UP   | 477.5886 | 477.5882 |
| 4051 | M809T34  | 7.501319 | 2.907144 | 1.253008 | 0.276133 | 0.434329 | UP   | 808.5642 | 808.5638 |
| 4052 | M879T10_ | 4.125034 | 2.044406 | 1.217381 | 0.276155 | 0.434332 | UP   | 879.3658 | 879.3641 |
| 4053 | M524T22  | 3.584352 | -1.84171 | -1.24649 | 0.276199 | 0.434338 | DOWN | 524.1301 | 524.1297 |
| 4054 | M397T10  | 3.284381 | 1.715621 | 1.210152 | 0.276206 | 0.434339 | UP   | 397.2854 | 397.2848 |
| 4055 | M728T9_2 | 4.632062 | 2.211655 | 1.224421 | 0.276232 | 0.434343 | UP   | 728.0878 | 728.0871 |
| 4056 | M271T18  | 2.020594 | 1.014779 | 1.171569 | 0.276296 | 0.434352 | UP   | 271.0031 | 271.0024 |
| 4057 | M364T30  | 2.354422 | 1.235373 | 1.178471 | 0.276326 | 0.434356 | UP   | 363.6035 | 363.6033 |
| 4058 | M365T31_ | 1.665763 | 0.736183 | 1.183495 | 0.276362 | 0.434361 | UP   | 365.0866 | 365.0863 |
| 4059 | M376T13_ | 37.08958 | -5.21294 | -1.25932 | 0.276376 | 0.434363 | DOWN | 376.2122 | 376.2116 |
| 4060 | M523T40  | 2.768    | 1.468844 | 1.241305 | 0.276392 | 0.434365 | UP   | 523.4205 | 523.4196 |
| 4061 | M565T22  | 3.238289 | -1.69523 | -1.24899 | 0.276402 | 0.434367 | DOWN | 565.157  | 565.1564 |
| 4062 | M496T22  | 2.949186 | -1.56032 | -1.24991 | 0.276445 | 0.434373 | DOWN | 496.1679 | 496.1668 |
| 4063 | M711T10_ | 10.48182 | 3.389817 | 1.255729 | 0.276525 | 0.434384 | UP   | 710.6772 | 710.6764 |
| 4064 | M893T39  | 2.94541  | 1.558468 | 1.228645 | 0.276543 | 0.434386 | UP   | 892.6578 | 892.6567 |
| 4065 | M1671T10 | 8.298656 | 3.052878 | 1.249087 | 0.276547 | 0.434387 | UP   | 1671.074 | 1671.07  |
| 4066 | M432T26_ | 2.050358 | 1.035876 | 1.173537 | 0.276555 | 0.434388 | UP   | 432.1835 | 432.1832 |
| 4067 | M512T26  | 3.595061 | 1.846016 | 1.256269 | 0.276578 | 0.434391 | UP   | 512.2911 | 512.291  |
| 4068 | M281T9_2 | 17.74473 | 4.149319 | 1.256905 | 0.276596 | 0.434393 | UP   | 281.4356 | 281.4354 |
| 4069 | M759T10_ | 7.363872 | 2.880465 | 1.245215 | 0.27661  | 0.434395 | UP   | 759.2657 | 759.2656 |
| 4070 | M577T32_ | 2.289464 | 1.19501  | 1.177021 | 0.276651 | 0.434401 | UP   | 577.2784 | 577.2776 |
| 4071 | M321T35  | 16.65117 | 4.057551 | 1.25798  | 0.276798 | 0.434421 | UP   | 321.2426 | 321.2426 |
| 4072 | M1038T9  | 2.472837 | 1.306167 | 1.201829 | 0.276944 | 0.434441 | UP   | 1038.243 | 1038.24  |
| 4073 | M739T10  | 4.791289 | 2.260414 | 1.23658  | 0.277018 | 0.434452 | UP   | 738.9517 | 738.9512 |
| 4074 | M348T9_3 | 1.703485 | 0.768489 | 1.230604 | 0.277097 | 0.434462 | UP   | 348.2573 | 348.2563 |
| 4075 | M747T31  | 2.403387 | 1.265069 | 1.169459 | 0.277366 | 0.434499 | UP   | 747.2091 | 747.2087 |
| 4076 | M498T30_ | 16.39467 | 4.035155 | 1.25567  | 0.277429 | 0.434508 | UP   | 498.3554 | 498.355  |
| 4077 | M886T30  | 1.132551 | 0.179576 | 1.168169 | 0.277494 | 0.434517 | UP   | 885.5988 | 885.5972 |
| 4078 | M383T10_ | 3.174833 | 1.666681 | 1.222257 | 0.277556 | 0.434525 | UP   | 383.297  | 383.2965 |
| 4079 | M388T10_ | 7.181732 | 2.844332 | 1.250803 | 0.277592 | 0.43453  | UP   | 388.2229 | 388.2216 |
| 4080 | M395T9   | 2.192175 | -1.13236 | -1.22564 | 0.277777 | 0.434556 | DOWN | 395.2155 | 395.2146 |
| 4081 | M654T9_1 | 10.86489 | 3.441602 | 1.250099 | 0.277798 | 0.434559 | UP   | 653.6208 | 653.6202 |
| 4082 | M1968T10 | 5.397653 | 2.432332 | 1.249257 | 0.277899 | 0.434573 | UP   | 1968.231 | 1968.226 |
| 4083 | M805T40  | 3.564051 | 1.833518 | 1.241035 | 0.277906 | 0.434573 | UP   | 804.6052 | 804.6037 |
| 4084 | M250T13  | 5.343074 | 2.41767  | 1.249085 | 0.277909 | 0.434574 | UP   | 250.2169 | 250.2164 |
| 4085 | M471T13  | 2.2293   | 1.156591 | 1.167687 | 0.278013 | 0.434588 | UP   | 471.3695 | 471.3688 |
| 4086 | M173T30  | 1.378366 | -0.46296 | -1.18488 | 0.278078 | 0.434597 | DOWN | 173.1325 | 173.1325 |
| 4087 | M552T23  | 6.106949 | 2.610452 | 1.252064 | 0.278232 | 0.434618 | UP   | 552.3434 | 552.343  |
| 4088 | M364T41  | 1.609894 | 0.686965 | 1.164575 | 0.278323 | 0.434631 | UP   | 364.3423 | 364.3417 |

|      |          |          |          |          |          |          |      |          |          |
|------|----------|----------|----------|----------|----------|----------|------|----------|----------|
| 4089 | M431T27  | 2.588211 | 1.371955 | 1.187328 | 0.278416 | 0.434643 | UP   | 431.3272 | 431.3266 |
| 4090 | M357T10_ | 10.02079 | 3.324924 | 1.248516 | 0.278419 | 0.434644 | UP   | 357.3353 | 357.335  |
| 4091 | M338T10_ | 1.895173 | 0.92233  | 1.163263 | 0.278427 | 0.434645 | UP   | 338.2159 | 338.2147 |
| 4092 | M427T35  | 1.727717 | -0.78887 | -1.16395 | 0.278449 | 0.434648 | DOWN | 426.8224 | 426.8221 |
| 4093 | M1106T11 | 2.09001  | 1.06351  | 1.171231 | 0.278477 | 0.434652 | UP   | 1105.669 | 1105.666 |
| 4094 | M776T29  | 2.403018 | -1.26485 | -1.22206 | 0.278532 | 0.434659 | DOWN | 776.1847 | 776.1834 |
| 4095 | M485T17_ | 13.2699  | -3.73009 | -1.25142 | 0.278577 | 0.434665 | DOWN | 485.2761 | 485.2752 |
| 4096 | M771T30  | 2.283909 | 1.191505 | 1.16855  | 0.278642 | 0.434674 | UP   | 771.2092 | 771.2085 |
| 4097 | M647T31  | 10.26342 | 3.35944  | 1.248277 | 0.278717 | 0.434684 | UP   | 647.2076 | 647.2072 |
| 4098 | M731T9_2 | 4.657548 | 2.219571 | 1.219024 | 0.278737 | 0.434687 | UP   | 730.9042 | 730.9039 |
| 4099 | M770T12  | 2.040107 | 1.028645 | 1.170187 | 0.278912 | 0.434711 | UP   | 769.5577 | 769.5562 |
| 4100 | M614T10_ | 6.916543 | 2.790051 | 1.238618 | 0.278942 | 0.434715 | UP   | 614.2039 | 614.2034 |
| 4101 | M981T39  | 3.318639 | 1.730592 | 1.221492 | 0.2791   | 0.434736 | UP   | 980.7105 | 980.7093 |
| 4102 | M472T35_ | 1.547665 | 0.630094 | 1.16451  | 0.279155 | 0.434744 | UP   | 472.3997 | 472.399  |
| 4103 | M735T9_1 | 12.79155 | 3.677119 | 1.246607 | 0.279315 | 0.434766 | UP   | 735.007  | 735.0066 |
| 4104 | M427T16_ | 2.455312 | 1.295906 | 1.16093  | 0.27941  | 0.434778 | UP   | 427.0255 | 427.0246 |
| 4105 | M747T35  | 2.310407 | 1.208147 | 1.197283 | 0.279412 | 0.434779 | UP   | 746.5634 | 746.5626 |
| 4106 | M774T10  | 2.629856 | 1.394984 | 1.178317 | 0.279415 | 0.434779 | UP   | 774.4944 | 774.4937 |
| 4107 | M216T10_ | 6.527571 | 2.706546 | 1.233987 | 0.279476 | 0.434787 | UP   | 216.2281 | 216.228  |
| 4108 | M759T20  | 9.773677 | -3.2889  | -1.2467  | 0.279511 | 0.434792 | DOWN | 759.3868 | 759.3862 |
| 4109 | M478T39  | 2.657888 | 1.41028  | 1.223185 | 0.279512 | 0.434792 | UP   | 477.8599 | 477.8594 |
| 4110 | M290T11_ | 2.371513 | 1.245808 | 1.16994  | 0.27961  | 0.434806 | UP   | 289.6078 | 289.6071 |
| 4111 | M538T31_ | 2.413874 | 1.27135  | 1.163863 | 0.279638 | 0.434809 | UP   | 538.046  | 538.0454 |
| 4112 | M1010T9_ | 4.928587 | 2.301174 | 1.21852  | 0.279735 | 0.434822 | UP   | 1010.021 | 1010.019 |
| 4113 | M761T10_ | 5.323505 | 2.412376 | 1.22417  | 0.279756 | 0.434825 | UP   | 761.0296 | 761.0293 |
| 4114 | M383T31_ | 3.520383 | -1.81573 | -1.23963 | 0.279804 | 0.434832 | DOWN | 383.2039 | 383.2032 |
| 4115 | M860T21  | 1.945278 | 0.959976 | 1.176063 | 0.28     | 0.434858 | UP   | 859.5694 | 859.5673 |
| 4116 | M527T10  | 3.062102 | 1.614522 | 1.187421 | 0.280261 | 0.434894 | UP   | 526.8823 | 526.8808 |
| 4117 | M357T10_ | 9.55475  | 3.256218 | 1.242923 | 0.280336 | 0.434904 | UP   | 357.0567 | 357.0565 |
| 4118 | M464T19  | 2.032581 | 1.023313 | 1.161009 | 0.280381 | 0.43491  | UP   | 464.4215 | 464.421  |
| 4119 | M683T9   | 4.403146 | 2.138535 | 1.210928 | 0.280493 | 0.434925 | UP   | 683.2481 | 683.2472 |
| 4120 | M1025T39 | 3.52871  | 1.819141 | 1.21867  | 0.280527 | 0.434929 | UP   | 1024.737 | 1024.737 |
| 4121 | M659T28  | 1.965045 | 0.974563 | 1.226572 | 0.280612 | 0.434941 | UP   | 659.4924 | 659.491  |
| 4122 | M537T39  | 3.55567  | 1.830122 | 1.232856 | 0.280785 | 0.434964 | UP   | 537.3172 | 537.3166 |
| 4123 | M437T32_ | 2.262752 | 1.178078 | 1.199537 | 0.280995 | 0.434992 | UP   | 437.3474 | 437.3471 |
| 4124 | M602T33  | 1.505727 | -0.59046 | -1.18821 | 0.281054 | 0.435    | DOWN | 602.2911 | 602.291  |
| 4125 | M287T27  | 1.857584 | 0.893428 | 1.168049 | 0.281295 | 0.435033 | UP   | 287.2008 | 287.2003 |
| 4126 | M610T11_ | 3.049256 | 1.608458 | 1.190138 | 0.281389 | 0.435045 | UP   | 609.7946 | 609.7839 |
| 4127 | M1044T9_ | 12.09388 | 3.596205 | 1.239604 | 0.281397 | 0.435046 | UP   | 1044.321 | 1044.32  |
| 4128 | M484T29_ | 1.771553 | -0.82501 | -1.19743 | 0.281439 | 0.435052 | DOWN | 484.3306 | 484.3301 |
| 4129 | M432T24  | 3.294829 | -1.7202  | -1.22405 | 0.281502 | 0.43506  | DOWN | 432.1836 | 432.1832 |
| 4130 | M632T11  | 2.05394  | 1.038394 | 1.155718 | 0.281599 | 0.435073 | UP   | 632.0202 | 632.0186 |
| 4131 | M440T24  | 2.104277 | 1.073325 | 1.165239 | 0.281639 | 0.435078 | UP   | 440.3585 | 440.3582 |
| 4132 | M690T34  | 2.754213 | 1.46164  | 1.205545 | 0.281862 | 0.435108 | UP   | 689.5247 | 689.5235 |
| 4133 | M442T10_ | 2.509633 | 1.327476 | 1.16057  | 0.282006 | 0.435128 | UP   | 442.1718 | 442.1707 |
| 4134 | M1005T10 | 2.750803 | 1.459853 | 1.171776 | 0.282013 | 0.435128 | UP   | 1004.624 | 1004.623 |
| 4135 | M760T30  | 5.325241 | 2.412847 | 1.222967 | 0.282026 | 0.43513  | UP   | 760.1777 | 760.1769 |



|      |          |          |          |          |          |          |      |          |          |
|------|----------|----------|----------|----------|----------|----------|------|----------|----------|
| 4136 | M457T27  | 4.957791 | 2.309698 | 1.237821 | 0.282089 | 0.435139 | UP   | 457.3062 | 457.3055 |
| 4137 | M490T9_3 | 5.949919 | 2.57287  | 1.221559 | 0.282093 | 0.435139 | UP   | 490.0377 | 490.0373 |
| 4138 | M269T11  | 1.61557  | 0.692044 | 1.156138 | 0.282109 | 0.435141 | UP   | 269.1907 | 269.1902 |
| 4139 | M639T33_ | 1.961344 | 0.971843 | 1.164627 | 0.282193 | 0.435152 | UP   | 639.4482 | 639.4471 |
| 4140 | M588T38  | 2.018866 | -1.01355 | -1.20225 | 0.282308 | 0.435168 | DOWN | 587.5069 | 587.5067 |
| 4141 | M790T10_ | 3.592853 | 1.84513  | 1.200602 | 0.282407 | 0.435181 | UP   | 790.4924 | 790.4913 |
| 4142 | M327T11  | 1.846854 | 0.88507  | 1.152454 | 0.282411 | 0.435181 | UP   | 327.1962 | 327.195  |
| 4143 | M491T9_4 | 3.319764 | -1.73108 | -1.21965 | 0.28245  | 0.435187 | DOWN | 491.3198 | 491.3194 |
| 4144 | M508T34_ | 2.199949 | 1.13747  | 1.174195 | 0.282514 | 0.435195 | UP   | 508.3721 | 508.371  |
| 4145 | M314T33_ | 2.362343 | 1.240219 | 1.159296 | 0.282557 | 0.435201 | UP   | 313.6491 | 313.6487 |
| 4146 | M404T44  | 2.824797 | -1.49815 | -1.22943 | 0.282583 | 0.435204 | DOWN | 404.3448 | 404.3444 |
| 4147 | M657T28  | 3.050707 | 1.609144 | 1.194735 | 0.282615 | 0.435208 | UP   | 657.1415 | 657.1407 |
| 4148 | M908T30  | 1.883397 | 0.913337 | 1.152123 | 0.28263  | 0.435211 | UP   | 907.6778 | 907.6764 |
| 4149 | M629T31  | 2.082852 | -1.05856 | -1.17668 | 0.282777 | 0.43523  | DOWN | 629.2962 | 629.2958 |
| 4150 | M662T33  | 2.112357 | 1.078854 | 1.166222 | 0.282895 | 0.435246 | UP   | 661.9628 | 661.9616 |
| 4151 | M1668T10 | 8.621731 | 3.107977 | 1.231204 | 0.282978 | 0.435257 | UP   | 1668.214 | 1668.209 |
| 4152 | M751T23  | 2.618379 | 1.388674 | 1.151292 | 0.283091 | 0.435272 | UP   | 750.787  | 750.7866 |
| 4153 | M479T11  | 2.047346 | 1.033755 | 1.152123 | 0.283128 | 0.435276 | UP   | 479.4039 | 479.4028 |
| 4154 | M288T23_ | 1.701173 | 0.76653  | 1.15066  | 0.283138 | 0.435278 | UP   | 288.2899 | 288.2893 |
| 4155 | M982T39  | 4.251227 | 2.087879 | 1.212372 | 0.283286 | 0.435297 | UP   | 981.7137 | 981.7117 |
| 4156 | M459T9   | 3.062679 | -1.61479 | -1.20353 | 0.283298 | 0.435299 | DOWN | 459.2794 | 459.2785 |
| 4157 | M673T9_1 | 4.100437 | 2.035778 | 1.204619 | 0.283324 | 0.435303 | UP   | 672.8951 | 672.8947 |
| 4158 | M389T34_ | 2.723802 | 1.445622 | 1.23485  | 0.283335 | 0.435304 | UP   | 389.2301 | 389.23   |
| 4159 | M457T9_7 | 12.643   | 3.660267 | 1.234347 | 0.283371 | 0.435309 | UP   | 457.3785 | 457.3781 |
| 4160 | M479T41  | 2.206804 | 1.141959 | 1.207207 | 0.283377 | 0.43531  | UP   | 479.3942 | 479.3933 |
| 4161 | M664T18  | 2.298855 | 1.200915 | 1.150674 | 0.283393 | 0.435312 | UP   | 663.9673 | 663.9663 |
| 4162 | M770T30  | 2.269739 | 1.182526 | 1.156738 | 0.283421 | 0.435315 | UP   | 770.2061 | 770.2052 |
| 4163 | M497T41  | 2.809427 | 1.490276 | 1.220854 | 0.28351  | 0.435327 | UP   | 497.4242 | 497.4236 |
| 4164 | M363T30_ | 2.370206 | 1.245013 | 1.159807 | 0.283614 | 0.435341 | UP   | 362.6036 | 362.6031 |
| 4165 | M491T9_1 | 5.701365 | 2.511307 | 1.21486  | 0.283615 | 0.435341 | UP   | 490.6516 | 490.6513 |
| 4166 | M650T10  | 1.983507 | 0.988054 | 1.152488 | 0.283837 | 0.43537  | UP   | 650.4864 | 650.4844 |
| 4167 | M543T34  | 1.959036 | 0.970144 | 1.155972 | 0.283841 | 0.435371 | UP   | 542.882  | 542.881  |
| 4168 | M654T9_2 | 9.358424 | 3.226266 | 1.229721 | 0.2839   | 0.435378 | UP   | 654.0667 | 654.066  |
| 4169 | M655T9_1 | 9.528054 | 3.252182 | 1.229901 | 0.283941 | 0.435384 | UP   | 654.5666 | 654.5658 |
| 4170 | M433T34_ | 2.141501 | 1.098622 | 1.167197 | 0.283975 | 0.435388 | UP   | 432.8165 | 432.8154 |
| 4171 | M507T30_ | 2.067566 | -1.04793 | -1.16017 | 0.284058 | 0.435399 | DOWN | 507.1693 | 507.1686 |
| 4172 | M445T39  | 2.411118 | 1.269702 | 1.22188  | 0.28408  | 0.435402 | UP   | 445.1736 | 445.1735 |
| 4173 | M850T39  | 3.377094 | 1.755782 | 1.215852 | 0.284082 | 0.435402 | UP   | 849.6352 | 849.6332 |
| 4174 | M281T16_ | 5.202296 | -2.37915 | -1.22589 | 0.284093 | 0.435404 | DOWN | 281.0682 | 281.068  |
| 4175 | M791T10_ | 3.019305 | 1.594216 | 1.18026  | 0.284099 | 0.435405 | UP   | 790.9941 | 790.994  |
| 4176 | M1042T9_ | 14.68595 | 3.876365 | 1.233123 | 0.284266 | 0.435427 | UP   | 1042.415 | 1042.414 |
| 4177 | M489T9_1 | 4.47523  | 2.161962 | 1.218092 | 0.284317 | 0.435433 | UP   | 488.6533 | 488.6531 |
| 4178 | M635T11  | 1.919326 | 0.9406   | 1.150895 | 0.284319 | 0.435434 | UP   | 635.4761 | 635.4738 |
| 4179 | M370T10_ | 2.702953 | 1.434536 | 1.170179 | 0.284408 | 0.435445 | UP   | 369.7191 | 369.7184 |
| 4180 | M733T10  | 4.279146 | 2.097323 | 1.204342 | 0.284457 | 0.435452 | UP   | 733.4325 | 733.4302 |
| 4181 | M760T18_ | 15.44701 | -3.94926 | -1.2338  | 0.284465 | 0.435453 | DOWN | 760.3899 | 760.3871 |
| 4182 | M807T40  | 4.216895 | 2.076181 | 1.222617 | 0.284688 | 0.435482 | UP   | 806.6119 | 806.6113 |

|      |          |          |          |          |          |          |      |          |          |
|------|----------|----------|----------|----------|----------|----------|------|----------|----------|
| 4183 | M844T42_ | 1.365837 | 0.449786 | 1.146539 | 0.284775 | 0.435493 | UP   | 844.0867 | 844.0852 |
| 4184 | M439T39  | 1.974155 | 0.981236 | 1.222859 | 0.284794 | 0.435496 | UP   | 439.1788 | 439.1786 |
| 4185 | M350T9_6 | 8.749923 | 3.12927  | 1.226496 | 0.284799 | 0.435496 | UP   | 350.081  | 350.0808 |
| 4186 | M443T11_ | 1.974069 | 0.981172 | 1.146567 | 0.284961 | 0.435518 | UP   | 443.3314 | 443.3304 |
| 4187 | M294T13  | 3.087944 | 1.626647 | 1.207707 | 0.28502  | 0.435526 | UP   | 294.2431 | 294.2429 |
| 4188 | M319T9   | 3.609774 | -1.85191 | -1.22025 | 0.285039 | 0.435528 | DOWN | 319.2722 | 319.272  |
| 4189 | M621T10_ | 2.250914 | 1.170511 | 1.163704 | 0.285083 | 0.435534 | UP   | 620.5118 | 620.5097 |
| 4190 | M515T20  | 2.901668 | 1.536882 | 1.160244 | 0.285112 | 0.435537 | UP   | 515.1368 | 515.1367 |
| 4191 | M366T9_2 | 9.055505 | 3.178795 | 1.225522 | 0.285297 | 0.435562 | UP   | 366.4259 | 366.4258 |
| 4192 | M695T10_ | 2.146994 | 1.102318 | 1.151935 | 0.285528 | 0.435592 | UP   | 694.5321 | 694.5291 |
| 4193 | M653T9_4 | 9.454102 | 3.24094  | 1.225177 | 0.285533 | 0.435592 | UP   | 653.1758 | 653.1753 |
| 4194 | M420T28_ | 2.27443  | 1.185505 | 1.161787 | 0.2856   | 0.435601 | UP   | 420.1317 | 420.1314 |
| 4195 | M1758T10 | 2.965805 | 1.568424 | 1.155194 | 0.285619 | 0.435604 | UP   | 1758.104 | 1758.102 |
| 4196 | M289T29_ | 2.058868 | 1.041851 | 1.144659 | 0.285693 | 0.435613 | UP   | 288.6336 | 288.6332 |
| 4197 | M525T11  | 2.321795 | 1.215241 | 1.166271 | 0.285697 | 0.435614 | UP   | 525.184  | 525.1826 |
| 4198 | M759T18_ | 13.53562 | -3.75869 | -1.22998 | 0.285703 | 0.435614 | DOWN | 759.3865 | 759.3852 |
| 4199 | M606T44  | 1.339968 | 0.422199 | 1.151742 | 0.286029 | 0.435657 | UP   | 606.4383 | 606.4381 |
| 4200 | M350T10_ | 9.32244  | 3.220708 | 1.22321  | 0.286032 | 0.435657 | UP   | 349.9068 | 349.9064 |
| 4201 | M1121T9  | 5.544266 | 2.470996 | 1.211486 | 0.286122 | 0.435669 | UP   | 1120.681 | 1120.676 |
| 4202 | M704T9_2 | 8.275571 | 3.048859 | 1.22177  | 0.286145 | 0.435672 | UP   | 704.3549 | 704.3549 |
| 4203 | M806T40  | 3.551544 | 1.828447 | 1.215494 | 0.286156 | 0.435673 | UP   | 805.6087 | 805.6072 |
| 4204 | M460T29  | 2.384866 | 1.253908 | 1.149036 | 0.286201 | 0.435679 | UP   | 459.526  | 459.5256 |
| 4205 | M456T39  | 3.214929 | 1.684787 | 1.203924 | 0.286213 | 0.435681 | UP   | 455.8474 | 455.8468 |
| 4206 | M431T21_ | 1.914352 | 0.936856 | 1.146264 | 0.286309 | 0.435693 | UP   | 431.2912 | 431.2908 |
| 4207 | M1044T9_ | 12.328   | 3.623867 | 1.224656 | 0.286525 | 0.435721 | UP   | 1043.82  | 1043.82  |
| 4208 | M374T32_ | 2.330599 | 1.220701 | 1.143584 | 0.286532 | 0.435722 | UP   | 374.1345 | 374.134  |
| 4209 | M348T29  | 1.627441 | 0.702605 | 1.199825 | 0.28658  | 0.435728 | UP   | 348.2254 | 348.2253 |
| 4210 | M710T9_1 | 10.75817 | 3.427361 | 1.22317  | 0.286617 | 0.435733 | UP   | 709.6083 | 709.6077 |
| 4211 | M344T17  | 2.020032 | 1.014378 | 1.141883 | 0.286655 | 0.435738 | UP   | 343.5766 | 343.5757 |
| 4212 | M216T10_ | 7.065306 | 2.820752 | 1.216461 | 0.286672 | 0.43574  | UP   | 216.0485 | 216.0481 |
| 4213 | M687T9   | 4.153559 | 2.054348 | 1.187158 | 0.28681  | 0.435758 | UP   | 686.7671 | 686.7658 |
| 4214 | M308T28_ | 2.36682  | -1.24295 | -1.21044 | 0.286895 | 0.435769 | DOWN | 308.2069 | 308.2068 |
| 4215 | M598T38  | 1.751732 | 0.808782 | 1.140915 | 0.286906 | 0.435771 | UP   | 598.4528 | 598.4519 |
| 4216 | M1657T10 | 8.666495 | 3.115449 | 1.219302 | 0.287151 | 0.435802 | UP   | 1656.718 | 1656.717 |
| 4217 | M332T9_3 | 3.1511   | 1.655856 | 1.215302 | 0.287413 | 0.435836 | UP   | 331.8309 | 331.8306 |
| 4218 | M379T28  | 5.114345 | 2.354549 | 1.199292 | 0.287446 | 0.43584  | UP   | 378.5347 | 378.5346 |
| 4219 | M378T9_2 | 4.729191 | 2.241593 | 1.216247 | 0.287563 | 0.435855 | UP   | 378.2399 | 378.2395 |
| 4220 | M489T10  | 3.059995 | 1.613529 | 1.20757  | 0.287606 | 0.435861 | UP   | 489.2536 | 489.2526 |
| 4221 | M407T18_ | 1.821377 | 0.86503  | 1.14539  | 0.287644 | 0.435866 | UP   | 407.2908 | 407.2906 |
| 4222 | M332T26  | 2.185584 | 1.128019 | 1.142724 | 0.287714 | 0.435875 | UP   | 332.0935 | 332.0933 |
| 4223 | M479T20  | 1.823789 | 0.866939 | 1.144384 | 0.28774  | 0.435878 | UP   | 479.4039 | 479.4026 |
| 4224 | M610T10_ | 12.08054 | 3.594614 | 1.220305 | 0.287956 | 0.435906 | UP   | 609.9893 | 609.989  |
| 4225 | M510T43_ | 1.180652 | 0.239584 | 1.138366 | 0.287957 | 0.435906 | UP   | 510.033  | 510.032  |
| 4226 | M709T10_ | 1.859118 | 0.894619 | 1.138886 | 0.287979 | 0.435909 | UP   | 708.5114 | 708.5088 |
| 4227 | M283T29_ | 1.565007 | -0.64617 | -1.13915 | 0.28798  | 0.435909 | DOWN | 283.1186 | 283.1183 |
| 4228 | M685T20  | 1.926111 | 0.945691 | 1.145073 | 0.28803  | 0.435915 | UP   | 685.3495 | 685.3492 |
| 4229 | M305T33_ | 3.083907 | -1.62476 | -1.21687 | 0.288042 | 0.435917 | DOWN | 305.2391 | 305.239  |

|      |          |          |          |          |          |          |      |          |          |
|------|----------|----------|----------|----------|----------|----------|------|----------|----------|
| 4230 | M391T32  | 1.45928  | -0.54526 | -1.17351 | 0.288094 | 0.435923 | DOWN | 391.1088 | 391.1082 |
| 4231 | M994T31  | 5.570587 | -2.47783 | -1.21003 | 0.288187 | 0.435935 | DOWN | 993.6794 | 993.6778 |
| 4232 | M660T28_ | 2.001468 | 1.001058 | 1.214018 | 0.288283 | 0.435948 | UP   | 659.9941 | 659.9929 |
| 4233 | M599T38  | 1.823732 | 0.866894 | 1.138496 | 0.288343 | 0.435955 | UP   | 599.4562 | 599.4557 |
| 4234 | M658T10_ | 3.472069 | 1.795796 | 1.194515 | 0.288579 | 0.435985 | UP   | 658.4129 | 658.412  |
| 4235 | M350T9_2 | 7.040868 | 2.815753 | 1.216811 | 0.28865  | 0.435995 | UP   | 349.7111 | 349.7106 |
| 4236 | M756T11  | 3.365344 | 1.750754 | 1.17874  | 0.288712 | 0.436003 | UP   | 756.4885 | 756.4877 |
| 4237 | M761T40  | 3.721366 | 1.895832 | 1.213155 | 0.288723 | 0.436004 | UP   | 760.5789 | 760.5775 |
| 4238 | M551T9_1 | 2.849058 | -1.51049 | -1.20617 | 0.288746 | 0.436007 | DOWN | 551.2336 | 551.2325 |
| 4239 | M602T11  | 1.841328 | 0.880747 | 1.139018 | 0.288758 | 0.436008 | UP   | 602.3754 | 602.3734 |
| 4240 | M782T31  | 455.6957 | 8.831927 | 1.221658 | 0.28891  | 0.436028 | UP   | 782.2664 | 782.266  |
| 4241 | M1986T10 | 5.788138 | 2.533099 | 1.216244 | 0.289055 | 0.436046 | UP   | 1986.066 | 1986.061 |
| 4242 | M442T12  | 1.95622  | 0.968068 | 1.139679 | 0.289065 | 0.436048 | UP   | 442.3379 | 442.337  |
| 4243 | M686T9_3 | 4.362811 | 2.125258 | 1.185854 | 0.289095 | 0.436051 | UP   | 686.2871 | 686.2856 |
| 4244 | M540T30  | 3.756025 | 1.909207 | 1.183455 | 0.289114 | 0.436054 | UP   | 540.1786 | 540.178  |
| 4245 | M378T10_ | 3.693866 | 1.885132 | 1.188142 | 0.289141 | 0.436057 | UP   | 377.7363 | 377.7359 |
| 4246 | M217T10_ | 9.199481 | 3.201553 | 1.214995 | 0.289182 | 0.436062 | UP   | 216.5    | 216.4999 |
| 4247 | M316T10  | 4.055777 | 2.019978 | 1.188415 | 0.289331 | 0.436081 | UP   | 316.1646 | 316.1645 |
| 4248 | M434T39  | 2.894988 | 1.533557 | 1.212948 | 0.289343 | 0.436083 | UP   | 433.8339 | 433.8333 |
| 4249 | M439T10_ | 2.489964 | 1.316125 | 1.153744 | 0.289378 | 0.436087 | UP   | 439.1738 | 439.1719 |
| 4250 | M363T11_ | 1.779544 | 0.831508 | 1.134655 | 0.289389 | 0.436089 | UP   | 363.0912 | 363.0845 |
| 4251 | M638T10  | 2.944272 | 1.557911 | 1.159396 | 0.289467 | 0.436099 | UP   | 637.5099 | 637.5093 |
| 4252 | M1120T9  | 4.996867 | 2.321024 | 1.197394 | 0.289508 | 0.436104 | UP   | 1119.677 | 1119.674 |
| 4253 | M253T13_ | 1.911889 | 0.934999 | 1.134327 | 0.289525 | 0.436106 | UP   | 253.4105 | 253.4103 |
| 4254 | M981T41  | 3.133082 | -1.64758 | -1.19528 | 0.289552 | 0.43611  | DOWN | 980.5248 | 980.5233 |
| 4255 | M476T9_5 | 10.05447 | 3.329766 | 1.215056 | 0.289554 | 0.43611  | UP   | 476.4107 | 476.4102 |
| 4256 | M648T34  | 3.18745  | 1.672403 | 1.211542 | 0.289702 | 0.436129 | UP   | 647.5034 | 647.5025 |
| 4257 | M1123T9  | 6.037598 | 2.593975 | 1.208264 | 0.289732 | 0.436132 | UP   | 1122.683 | 1122.68  |
| 4258 | M498T30_ | 2.6795   | 1.421964 | 1.185802 | 0.28977  | 0.436137 | UP   | 498.3943 | 498.3938 |
| 4259 | M386T24_ | 2.086209 | 1.060884 | 1.153998 | 0.289807 | 0.436142 | UP   | 386.3413 | 386.3407 |
| 4260 | M824T11  | 4.028143 | 2.010115 | 1.208862 | 0.289824 | 0.436144 | UP   | 824.3434 | 824.342  |
| 4261 | M731T9_3 | 3.643581 | 1.865357 | 1.176781 | 0.289874 | 0.43615  | UP   | 731.3797 | 731.3788 |
| 4262 | M357T10_ | 8.36104  | 3.063682 | 1.214317 | 0.289881 | 0.436151 | UP   | 356.6757 | 356.6754 |
| 4263 | M187T22  | 2.121791 | 1.085282 | 1.199432 | 0.290156 | 0.436186 | UP   | 187.0417 | 187.0416 |
| 4264 | M894T39  | 3.077789 | 1.621895 | 1.190409 | 0.29025  | 0.436198 | UP   | 893.6613 | 893.6596 |
| 4265 | M327T27_ | 1.777241 | -0.82964 | -1.17386 | 0.290291 | 0.436203 | DOWN | 327.3008 | 327.3005 |
| 4266 | M416T25_ | 2.587021 | -1.37129 | -1.19288 | 0.290343 | 0.43621  | DOWN | 416.2147 | 416.2144 |
| 4267 | M358T9_3 | 8.45629  | 3.080025 | 1.209767 | 0.290444 | 0.436222 | UP   | 357.898  | 357.8978 |
| 4268 | M468T11  | 3.44131  | 1.782958 | 1.169487 | 0.290467 | 0.436225 | UP   | 468.1916 | 468.1911 |
| 4269 | M301T30  | 2.558838 | -1.35549 | -1.19609 | 0.290517 | 0.436232 | DOWN | 301.1412 | 301.1407 |
| 4270 | M423T20  | 1.883455 | 0.913382 | 1.14308  | 0.290524 | 0.436233 | UP   | 423.2799 | 423.2788 |
| 4271 | M467T17_ | 2.922497 | 1.547201 | 1.156414 | 0.290527 | 0.436233 | UP   | 467.1678 | 467.167  |
| 4272 | M573T34  | 1.993756 | 0.995489 | 1.144264 | 0.290589 | 0.436241 | UP   | 573.408  | 573.4073 |
| 4273 | M1981T9  | 4.518628 | 2.175885 | 1.205223 | 0.290637 | 0.436247 | UP   | 1981.072 | 1981.066 |
| 4274 | M428T11_ | 1.881315 | 0.911741 | 1.131252 | 0.29072  | 0.436257 | UP   | 427.8061 | 427.8058 |
| 4275 | M443T43  | 1.492071 | 0.577316 | 1.137178 | 0.290738 | 0.43626  | UP   | 443.3154 | 443.3152 |
| 4276 | M839T11_ | 2.37224  | 1.24625  | 1.134027 | 0.290757 | 0.436262 | UP   | 839.3706 | 839.3684 |

|      |          |          |          |          |          |          |      |          |          |
|------|----------|----------|----------|----------|----------|----------|------|----------|----------|
| 4277 | M1765T9  | 9.182275 | 3.198852 | 1.209025 | 0.290858 | 0.436275 | UP   | 1765.27  | 1765.269 |
| 4278 | M573T31  | 1.914187 | -0.93673 | -1.15876 | 0.290932 | 0.436284 | DOWN | 573.3379 | 573.3377 |
| 4279 | M682T29  | 1.931689 | 0.949863 | 1.140481 | 0.290941 | 0.436285 | UP   | 682.1747 | 682.1736 |
| 4280 | M377T13_ | 29.96502 | -4.90521 | -1.2153  | 0.291051 | 0.436299 | DOWN | 377.2156 | 377.2149 |
| 4281 | M1007T9  | 5.852442 | 2.549039 | 1.197363 | 0.291233 | 0.436322 | UP   | 1006.874 | 1006.872 |
| 4282 | M499T18_ | 1.849973 | 0.887504 | 1.131367 | 0.291301 | 0.436331 | UP   | 499.2362 | 499.2361 |
| 4283 | M295T21_ | 1.867649 | 0.901223 | 1.130687 | 0.291368 | 0.436339 | UP   | 295.0268 | 295.0267 |
| 4284 | M520T22_ | 3.212943 | -1.6839  | -1.20164 | 0.291381 | 0.436341 | DOWN | 520.1344 | 520.1333 |
| 4285 | M331T10_ | 7.265889 | 2.861139 | 1.20796  | 0.291461 | 0.436351 | UP   | 331.1691 | 331.1688 |
| 4286 | M396T21_ | 2.011545 | 1.008304 | 1.141459 | 0.291508 | 0.436356 | UP   | 395.7648 | 395.7647 |
| 4287 | M716T34  | 2.393505 | 1.259125 | 1.156647 | 0.291674 | 0.436377 | UP   | 715.5213 | 715.5199 |
| 4288 | M651T23  | 2.339968 | 1.226489 | 1.130383 | 0.291707 | 0.436381 | UP   | 650.8614 | 650.861  |
| 4289 | M478T20  | 1.821734 | 0.865312 | 1.13606  | 0.291711 | 0.436382 | UP   | 478.4004 | 478.3993 |
| 4290 | M471T16  | 1.879671 | 0.91048  | 1.133673 | 0.291738 | 0.436385 | UP   | 471.3781 | 471.3778 |
| 4291 | M404T22_ | 2.200682 | 1.137951 | 1.137545 | 0.291797 | 0.436393 | UP   | 404.1159 | 404.1157 |
| 4292 | M515T10  | 3.376432 | 1.7555   | 1.182019 | 0.291798 | 0.436393 | UP   | 515.2057 | 515.2052 |
| 4293 | M560T32_ | 2.330305 | 1.220519 | 1.139622 | 0.291872 | 0.436402 | UP   | 559.9967 | 559.9964 |
| 4294 | M473T35_ | 1.638748 | 0.712594 | 1.132052 | 0.291877 | 0.436403 | UP   | 473.4028 | 473.4027 |
| 4295 | M1086T9  | 5.727247 | 2.517842 | 1.191773 | 0.292105 | 0.436431 | UP   | 1085.915 | 1085.914 |
| 4296 | M350T10_ | 4.046634 | 2.016722 | 1.205979 | 0.292172 | 0.43644  | UP   | 350.2332 | 350.2267 |
| 4297 | M546T28  | 6.333318 | -2.66296 | -1.20966 | 0.292228 | 0.436447 | DOWN | 546.3847 | 546.3844 |
| 4298 | M452T30_ | 2.684296 | 1.424544 | 1.130489 | 0.292254 | 0.43645  | UP   | 451.717  | 451.7167 |
| 4299 | M1004T9  | 5.142582 | 2.362493 | 1.187997 | 0.292363 | 0.436463 | UP   | 1004.127 | 1004.126 |
| 4300 | M364T22  | 2.826015 | 1.498769 | 1.154797 | 0.292402 | 0.436468 | UP   | 363.9903 | 363.9873 |
| 4301 | M512T30  | 3.025906 | 1.597367 | 1.189411 | 0.292469 | 0.436477 | UP   | 512.4099 | 512.4094 |
| 4302 | M697T9_1 | 2.151382 | 1.105264 | 1.142669 | 0.292532 | 0.436485 | UP   | 696.5116 | 696.5094 |
| 4303 | M674T10_ | 4.436608 | 2.149457 | 1.176542 | 0.292613 | 0.436495 | UP   | 673.8263 | 673.8259 |
| 4304 | M331T9_4 | 8.734741 | 3.126765 | 1.202993 | 0.29263  | 0.436497 | UP   | 330.848  | 330.8477 |
| 4305 | M390T32  | 1.416155 | -0.50198 | -1.1886  | 0.292675 | 0.436502 | DOWN | 390.1112 | 390.1105 |
| 4306 | M634T9_1 | 4.074286 | 2.026547 | 1.170891 | 0.292756 | 0.436512 | UP   | 633.8339 | 633.833  |
| 4307 | M1661T10 | 7.194613 | 2.846917 | 1.200497 | 0.292766 | 0.436514 | UP   | 1660.538 | 1660.536 |
| 4308 | M1085T9  | 5.1742   | 2.371336 | 1.184383 | 0.292939 | 0.436535 | UP   | 1084.952 | 1084.95  |
| 4309 | M473T23_ | 1.89108  | 0.91921  | 1.129304 | 0.292939 | 0.436535 | UP   | 473.2775 | 473.2768 |
| 4310 | M489T9_5 | 5.676626 | 2.505034 | 1.1895   | 0.292956 | 0.436537 | UP   | 489.4248 | 489.4248 |
| 4311 | M1008T9  | 5.260228 | 2.395125 | 1.191034 | 0.29297  | 0.436539 | UP   | 1007.734 | 1007.732 |
| 4312 | M602T29  | 1.950328 | -0.96372 | -1.1618  | 0.29302  | 0.436545 | DOWN | 602.2557 | 602.2546 |
| 4313 | M819T40  | 1.153962 | 0.206596 | 1.128647 | 0.29305  | 0.436549 | UP   | 818.5848 | 818.584  |
| 4314 | M330T30_ | 2.011722 | 1.008431 | 1.148076 | 0.293113 | 0.436557 | UP   | 330.1701 | 330.1697 |
| 4315 | M1009T9  | 5.688469 | 2.50804  | 1.188304 | 0.293349 | 0.436586 | UP   | 1008.683 | 1008.68  |
| 4316 | M1581T9  | 3.773302 | 1.915828 | 1.163087 | 0.293379 | 0.43659  | UP   | 1581.487 | 1581.484 |
| 4317 | M704T10_ | 3.680755 | 1.880002 | 1.183524 | 0.293397 | 0.436592 | UP   | 703.6007 | 703.599  |
| 4318 | M346T11_ | 1.781376 | 0.832992 | 1.124494 | 0.293438 | 0.436597 | UP   | 346.2099 | 346.2098 |
| 4319 | M350T9_1 | 7.480354 | 2.903107 | 1.19961  | 0.293439 | 0.436597 | UP   | 349.5369 | 349.5366 |
| 4320 | M360T10_ | 4.421077 | 2.144398 | 1.183957 | 0.293469 | 0.436601 | UP   | 360.3824 | 360.3818 |
| 4321 | M309T26_ | 2.079542 | 1.056266 | 1.138946 | 0.293863 | 0.43665  | UP   | 309.1264 | 309.1257 |
| 4322 | M490T9_2 | 5.712041 | 2.514006 | 1.187689 | 0.293985 | 0.436665 | UP   | 489.8773 | 489.8768 |
| 4323 | M426T22  | 2.592174 | -1.37416 | -1.17979 | 0.294016 | 0.436669 | DOWN | 426.2309 | 426.2305 |

|      |          |          |          |          |          |          |      |          |          |
|------|----------|----------|----------|----------|----------|----------|------|----------|----------|
| 4324 | M1762T10 | 10.80028 | 3.432996 | 1.20188  | 0.294042 | 0.436672 | UP   | 1761.976 | 1761.974 |
| 4325 | M684T9_1 | 4.134785 | 2.047812 | 1.174698 | 0.294169 | 0.436688 | UP   | 683.725  | 683.7236 |
| 4326 | M347T28  | 2.108931 | 1.076512 | 1.122597 | 0.294416 | 0.436718 | UP   | 347.1519 | 347.1514 |
| 4327 | M457T30  | 2.038342 | -1.0274  | -1.13834 | 0.294499 | 0.436728 | DOWN | 457.3035 | 457.303  |
| 4328 | M385T23_ | 2.601157 | -1.37915 | -1.12956 | 0.294532 | 0.436732 | DOWN | 385.261  | 385.2522 |
| 4329 | M554T38  | 1.759803 | 0.815414 | 1.121796 | 0.294576 | 0.436738 | UP   | 554.4263 | 554.4252 |
| 4330 | M495T19  | 11.11716 | -3.47472 | -1.20405 | 0.294667 | 0.436749 | DOWN | 495.0873 | 495.087  |
| 4331 | M360T9_2 | 3.657856 | 1.870998 | 1.164302 | 0.294758 | 0.43676  | UP   | 359.996  | 359.9951 |
| 4332 | M289T23_ | 1.738349 | 0.797718 | 1.121583 | 0.2949   | 0.436778 | UP   | 289.2932 | 289.2926 |
| 4333 | M675T38  | 1.932515 | 0.95048  | 1.15098  | 0.294968 | 0.436786 | UP   | 675.4772 | 675.4769 |
| 4334 | M740T9   | 3.475566 | 1.797248 | 1.164717 | 0.294991 | 0.436789 | UP   | 740.4653 | 740.464  |
| 4335 | M1766T10 | 10.59024 | 3.404663 | 1.198397 | 0.295126 | 0.436805 | UP   | 1766.165 | 1766.163 |
| 4336 | M1122T9  | 4.660723 | 2.220554 | 1.177968 | 0.295145 | 0.436808 | UP   | 1121.681 | 1121.68  |
| 4337 | M401T22_ | 2.101881 | 1.071681 | 1.121026 | 0.295217 | 0.436817 | UP   | 401.0183 | 401.0178 |
| 4338 | M501T36  | 1.757445 | -0.81348 | -1.15935 | 0.29522  | 0.436817 | DOWN | 501.3398 | 501.3394 |
| 4339 | M302T31_ | 1.878898 | 0.909886 | 1.126566 | 0.295477 | 0.436848 | UP   | 301.6421 | 301.6408 |
| 4340 | M216T10_ | 8.11524  | 3.020634 | 1.195604 | 0.295525 | 0.436854 | UP   | 216.0949 | 216.0949 |
| 4341 | M388T10_ | 1.698316 | 0.764105 | 1.118415 | 0.295846 | 0.436893 | UP   | 388.253  | 388.2513 |
| 4342 | M291T12  | 2.755002 | 1.462053 | 1.131232 | 0.29601  | 0.436913 | UP   | 291.0892 | 291.0887 |
| 4343 | M513T30  | 2.982284 | 1.576418 | 1.178864 | 0.296013 | 0.436914 | UP   | 513.4133 | 513.4126 |
| 4344 | M365T11_ | 1.742043 | 0.80078  | 1.12451  | 0.296178 | 0.436934 | UP   | 364.8291 | 364.828  |
| 4345 | M432T9_1 | 3.319425 | -1.73093 | -1.17214 | 0.2962   | 0.436937 | DOWN | 432.2804 | 432.28   |
| 4346 | M374T35  | 16.4308  | -4.03833 | -1.19885 | 0.296466 | 0.436969 | DOWN | 374.3624 | 374.3623 |
| 4347 | M883T9   | 5.480881 | -2.45441 | -1.18806 | 0.296582 | 0.436983 | DOWN | 882.5692 | 882.5682 |
| 4348 | M340T12_ | 8.065581 | 3.011778 | 1.198566 | 0.296599 | 0.436985 | UP   | 340.1559 | 340.1556 |
| 4349 | M923T44_ | 1.71204  | 0.775717 | 1.175799 | 0.296601 | 0.436985 | UP   | 922.5891 | 922.587  |
| 4350 | M1767T10 | 9.238658 | 3.207683 | 1.192169 | 0.296824 | 0.437013 | UP   | 1767.251 | 1767.249 |
| 4351 | M358T9_5 | 4.022741 | 2.008179 | 1.161003 | 0.296858 | 0.437017 | UP   | 358.0901 | 358.0896 |
| 4352 | M318T18_ | 3.10481  | 1.634505 | 1.137854 | 0.296895 | 0.437021 | UP   | 318.1493 | 318.1486 |
| 4353 | M325T27_ | 1.919871 | 0.941009 | 1.117166 | 0.29695  | 0.437028 | UP   | 324.5881 | 324.5876 |
| 4354 | M393T32  | 2.127201 | 1.088956 | 1.127733 | 0.297039 | 0.437039 | UP   | 393.3212 | 393.3201 |
| 4355 | M258T28  | 5.271279 | 2.398153 | 1.197362 | 0.297104 | 0.437047 | UP   | 258.2793 | 258.2789 |
| 4356 | M753T29  | 2.216378 | -1.1482  | -1.15029 | 0.297192 | 0.437057 | DOWN | 753.1876 | 753.1864 |
| 4357 | M1088T9  | 5.755514 | 2.524945 | 1.178807 | 0.297224 | 0.437061 | UP   | 1087.941 | 1087.94  |
| 4358 | M458T9_2 | 5.898048 | 2.560237 | 1.181255 | 0.297322 | 0.437073 | UP   | 457.7866 | 457.7865 |
| 4359 | M633T11  | 1.958795 | 0.969967 | 1.116867 | 0.297333 | 0.437074 | UP   | 633.0345 | 633.0344 |
| 4360 | M680T17  | 2.778023 | -1.47406 | -1.19319 | 0.29738  | 0.43708  | DOWN | 679.5123 | 679.5108 |
| 4361 | M266T9_1 | 2.525252 | -1.33643 | -1.13034 | 0.297383 | 0.43708  | DOWN | 265.8856 | 265.8854 |
| 4362 | M691T34  | 2.954011 | 1.562675 | 1.168249 | 0.297649 | 0.437112 | UP   | 690.5275 | 690.5264 |
| 4363 | M229T10_ | 8.862904 | 3.147779 | 1.189313 | 0.297706 | 0.437119 | UP   | 229.3314 | 229.3313 |
| 4364 | M641T12  | 2.01169  | 1.008408 | 1.120565 | 0.298055 | 0.437161 | UP   | 641.4494 | 641.449  |
| 4365 | M1736T9  | 4.494287 | 2.168092 | 1.164229 | 0.298084 | 0.437165 | UP   | 1736.391 | 1736.388 |
| 4366 | M340T10_ | 3.430777 | 1.778535 | 1.181159 | 0.298089 | 0.437166 | UP   | 339.6976 | 339.697  |
| 4367 | M1006T9_ | 5.409563 | 2.435512 | 1.173217 | 0.298122 | 0.43717  | UP   | 1005.929 | 1005.926 |
| 4368 | M388T10_ | 5.501213 | 2.45975  | 1.189253 | 0.29827  | 0.437187 | UP   | 387.6816 | 387.6809 |
| 4369 | M499T10  | 3.01048  | 1.589994 | 1.153978 | 0.298273 | 0.437188 | UP   | 499.1944 | 499.1935 |
| 4370 | M368T10_ | 9.377662 | 3.229228 | 1.189014 | 0.298289 | 0.43719  | UP   | 368.0173 | 368.0165 |

|      |          |          |          |          |          |          |      |          |          |
|------|----------|----------|----------|----------|----------|----------|------|----------|----------|
| 4371 | M380T10  | 170.8831 | 7.416866 | 1.193786 | 0.298519 | 0.437217 | UP   | 380.1977 | 380.1976 |
| 4372 | M676T9_2 | 4.721201 | 2.239154 | 1.166832 | 0.29856  | 0.437222 | UP   | 675.8087 | 675.8084 |
| 4373 | M340T10_ | 4.697096 | 2.231769 | 1.184544 | 0.298663 | 0.437235 | UP   | 340.4063 | 340.4056 |
| 4374 | M730T9_1 | 5.082494 | 2.345537 | 1.169575 | 0.298747 | 0.437245 | UP   | 729.7264 | 729.726  |
| 4375 | M502T21  | 4.992073 | 2.319639 | 1.192838 | 0.298758 | 0.437246 | UP   | 502.3068 | 502.3065 |
| 4376 | M379T10_ | 7.046639 | 2.816935 | 1.184186 | 0.298794 | 0.43725  | UP   | 378.5676 | 378.5673 |
| 4377 | M781T21  | 2.299173 | 1.201115 | 1.112459 | 0.298806 | 0.437252 | UP   | 780.9281 | 780.9263 |
| 4378 | M1861T10 | 4.463991 | 2.158334 | 1.162141 | 0.298826 | 0.437254 | UP   | 1860.829 | 1860.829 |
| 4379 | M533T30_ | 1.169871 | 0.22635  | 1.115705 | 0.298856 | 0.437258 | UP   | 533.3878 | 533.387  |
| 4380 | M450T38  | 354.605  | 8.470069 | 1.192645 | 0.298919 | 0.437265 | UP   | 450.1227 | 450.1226 |
| 4381 | M717T40  | 3.998864 | 1.99959  | 1.18642  | 0.298948 | 0.437269 | UP   | 716.5525 | 716.5513 |
| 4382 | M482T31  | 3.524941 | 1.817599 | 1.17208  | 0.298977 | 0.437272 | UP   | 482.3994 | 482.3988 |
| 4383 | M315T30_ | 1.778045 | 0.830292 | 1.139163 | 0.29904  | 0.43728  | UP   | 315.1506 | 315.1501 |
| 4384 | M414T10_ | 2.606897 | 1.382334 | 1.135959 | 0.299045 | 0.43728  | UP   | 413.7977 | 413.7895 |
| 4385 | M179T16_ | 2.76722  | 1.468437 | 1.14849  | 0.29915  | 0.437293 | UP   | 178.9462 | 178.9461 |
| 4386 | M653T9_2 | 13.85409 | 3.79224  | 1.189002 | 0.299255 | 0.437305 | UP   | 652.7315 | 652.7314 |
| 4387 | M453T41_ | 2.284399 | 1.191815 | 1.161686 | 0.299389 | 0.437321 | UP   | 453.398  | 453.3978 |
| 4388 | M350T33  | 1.825422 | 0.86823  | 1.173522 | 0.299451 | 0.437329 | UP   | 350.2409 | 350.2409 |
| 4389 | M382T19_ | 2.054981 | 1.039125 | 1.110306 | 0.299522 | 0.437337 | UP   | 381.9215 | 381.9209 |
| 4390 | M801T20  | 16.46914 | -4.04169 | -1.18991 | 0.29955  | 0.437341 | DOWN | 801.4084 | 801.4079 |
| 4391 | M519T11_ | 1.985354 | 0.989396 | 1.117669 | 0.29979  | 0.437369 | UP   | 519.391  | 519.3901 |
| 4392 | M615T10_ | 5.419538 | 2.43817  | 1.170494 | 0.299802 | 0.437371 | UP   | 615.4177 | 615.4171 |
| 4393 | M253T28  | 1.554765 | -0.6367  | -1.15016 | 0.299897 | 0.437382 | DOWN | 253.1071 | 253.1068 |
| 4394 | M216T10_ | 6.747867 | 2.754432 | 1.17893  | 0.299947 | 0.437388 | UP   | 216.302  | 216.302  |
| 4395 | M762T40  | 4.060466 | 2.021645 | 1.182836 | 0.299979 | 0.437392 | UP   | 761.5824 | 761.5808 |
| 4396 | M357T10_ | 8.64463  | 3.111804 | 1.182204 | 0.300119 | 0.437408 | UP   | 357.0346 | 357.0286 |
| 4397 | M597T22  | 3.018195 | -1.59369 | -1.17853 | 0.300138 | 0.437411 | DOWN | 597.0435 | 597.0422 |
| 4398 | M245T25  | 2.706549 | 1.436455 | 1.158392 | 0.300208 | 0.437419 | UP   | 245.1514 | 245.1513 |
| 4399 | M765T34  | 4.738085 | 2.244304 | 1.177655 | 0.300221 | 0.437421 | UP   | 764.538  | 764.5379 |
| 4400 | M1107T28 | 1.911049 | 0.934365 | 1.166356 | 0.300223 | 0.437421 | UP   | 1106.783 | 1106.782 |
| 4401 | M612T10_ | 6.088674 | 2.606128 | 1.1736   | 0.300339 | 0.437435 | UP   | 612.1336 | 612.1335 |
| 4402 | M1042T9_ | 16.5448  | 4.048306 | 1.186135 | 0.300507 | 0.437455 | UP   | 1041.916 | 1041.916 |
| 4403 | M585T10  | 2.093303 | 1.065781 | 1.123288 | 0.300525 | 0.437457 | UP   | 585.4015 | 585.4005 |
| 4404 | M347T13_ | 1.622475 | 0.698196 | 1.106982 | 0.300681 | 0.437475 | UP   | 347.222  | 347.2214 |
| 4405 | M600T31_ | 1.90645  | 0.930888 | 1.107863 | 0.300688 | 0.437476 | UP   | 600.275  | 600.2743 |
| 4406 | M304T2   | 2.206114 | -1.14151 | -1.16412 | 0.300691 | 0.437476 | DOWN | 303.8833 | 303.8831 |
| 4407 | M357T10_ | 10.62685 | 3.409643 | 1.182783 | 0.300796 | 0.437489 | UP   | 357.4165 | 357.4163 |
| 4408 | M660T9_3 | 3.512958 | 1.812686 | 1.150295 | 0.300971 | 0.43751  | UP   | 660.4629 | 660.4612 |
| 4409 | M655T9_3 | 7.127979 | 2.833493 | 1.175667 | 0.301007 | 0.437514 | UP   | 655.0135 | 655.0127 |
| 4410 | M319T31_ | 289.7102 | 8.178467 | 1.186043 | 0.301242 | 0.437542 | UP   | 319.2442 | 319.2406 |
| 4411 | M379T31_ | 1.749135 | 0.806642 | 1.158366 | 0.301444 | 0.437566 | UP   | 378.9422 | 378.942  |
| 4412 | M263T14  | 3.871583 | 1.952923 | 1.154064 | 0.301448 | 0.437566 | UP   | 263.0401 | 263.0399 |
| 4413 | M725T11_ | 1.882818 | 0.912893 | 1.10442  | 0.301613 | 0.437585 | UP   | 725.4278 | 725.4252 |
| 4414 | M1674T10 | 9.583594 | 3.260567 | 1.179767 | 0.301641 | 0.437589 | UP   | 1674.054 | 1674.053 |
| 4415 | M541T40  | 3.153449 | 1.65693  | 1.176646 | 0.301649 | 0.43759  | UP   | 541.4505 | 541.4494 |
| 4416 | M522T22  | 3.120937 | -1.64198 | -1.175   | 0.301652 | 0.43759  | DOWN | 522.1312 | 522.13   |
| 4417 | M490T9_4 | 5.192234 | 2.376355 | 1.164695 | 0.301876 | 0.437616 | UP   | 490.1986 | 490.1981 |

|      |          |          |          |          |          |          |      |          |          |
|------|----------|----------|----------|----------|----------|----------|------|----------|----------|
| 4418 | M563T29  | 4.025557 | -2.00919 | -1.17097 | 0.301945 | 0.437624 | DOWN | 563.3131 | 563.3125 |
| 4419 | M633T10_ | 3.268924 | 1.708816 | 1.131454 | 0.301958 | 0.437626 | UP   | 632.6605 | 632.6601 |
| 4420 | M837T11_ | 2.272513 | -1.18429 | -1.1595  | 0.301967 | 0.437627 | DOWN | 837.3422 | 837.3402 |
| 4421 | M756T10_ | 7.013244 | 2.810082 | 1.173324 | 0.301999 | 0.437631 | UP   | 755.8207 | 755.8202 |
| 4422 | M447T28_ | 1.953659 | 0.966178 | 1.103355 | 0.302034 | 0.437635 | UP   | 447.0766 | 447.0764 |
| 4423 | M613T10_ | 7.558756 | 2.918149 | 1.175415 | 0.302056 | 0.437638 | UP   | 612.906  | 612.9046 |
| 4424 | M230T10_ | 9.117827 | 3.18869  | 1.177539 | 0.30206  | 0.437638 | UP   | 229.7246 | 229.7245 |
| 4425 | M419T13  | 11.25792 | -3.49287 | -1.18306 | 0.302094 | 0.437642 | DOWN | 419.218  | 419.2172 |
| 4426 | M613T10_ | 7.265134 | 2.860989 | 1.173553 | 0.302102 | 0.437643 | UP   | 613.1221 | 613.1216 |
| 4427 | M400T22_ | 1.99727  | 0.998029 | 1.106603 | 0.302124 | 0.437646 | UP   | 400.0147 | 400.0133 |
| 4428 | M752T29_ | 1.925034 | -0.94488 | -1.13441 | 0.302137 | 0.437647 | DOWN | 752.184  | 752.1829 |
| 4429 | M676T10_ | 1.833155 | 0.874329 | 1.102946 | 0.302144 | 0.437648 | UP   | 676.4135 | 676.4113 |
| 4430 | M677T10_ | 6.261724 | 2.64656  | 1.174025 | 0.302145 | 0.437648 | UP   | 677.255  | 677.2547 |
| 4431 | M759T10_ | 6.255126 | 2.645039 | 1.171154 | 0.302254 | 0.437661 | UP   | 758.9673 | 758.9665 |
| 4432 | M218T26  | 1.71313  | 0.776635 | 1.103842 | 0.302276 | 0.437663 | UP   | 218.0902 | 218.0897 |
| 4433 | M233T28  | 2.119861 | 1.08397  | 1.114125 | 0.302366 | 0.437674 | UP   | 233.0262 | 233.0259 |
| 4434 | M325T28_ | 1.906271 | 0.930754 | 1.10557  | 0.302389 | 0.437677 | UP   | 324.588  | 324.5878 |
| 4435 | M684T9_2 | 4.035263 | 2.012663 | 1.148017 | 0.3024   | 0.437678 | UP   | 684.2007 | 684.1997 |
| 4436 | M378T10_ | 11.42101 | 3.513619 | 1.178891 | 0.302521 | 0.437692 | UP   | 377.9551 | 377.9551 |
| 4437 | M1961T9  | 4.306918 | 2.106656 | 1.171499 | 0.302543 | 0.437695 | UP   | 1961.282 | 1961.278 |
| 4438 | M726T11  | 1.876853 | 0.908316 | 1.102158 | 0.302577 | 0.437699 | UP   | 726.4311 | 726.4286 |
| 4439 | M644T34  | 2.725541 | 1.446543 | 1.15071  | 0.302696 | 0.437713 | UP   | 644.4948 | 644.4936 |
| 4440 | M281T9_1 | 8.584163 | 3.101678 | 1.177865 | 0.302721 | 0.437716 | UP   | 281.2388 | 281.2385 |
| 4441 | M525T32_ | 4.799622 | 2.262921 | 1.173495 | 0.302772 | 0.437722 | UP   | 525.3997 | 525.3993 |
| 4442 | M378T9_3 | 9.302272 | 3.217583 | 1.175792 | 0.302916 | 0.437738 | UP   | 378.3712 | 378.3709 |
| 4443 | M598T30_ | 1.661289 | -0.7323  | -1.10127 | 0.302916 | 0.437738 | DOWN | 598.3179 | 598.3159 |
| 4444 | M1107T11 | 1.960654 | 0.971335 | 1.102585 | 0.302982 | 0.437746 | UP   | 1106.673 | 1106.67  |
| 4445 | M1742T9  | 4.069962 | 2.025015 | 1.144753 | 0.303084 | 0.437758 | UP   | 1741.551 | 1741.549 |
| 4446 | M364T13  | 2.626852 | 1.393335 | 1.107954 | 0.3031   | 0.43776  | UP   | 363.9263 | 363.9263 |
| 4447 | M391T18  | 1.670691 | 0.740445 | 1.101079 | 0.303126 | 0.437763 | UP   | 391.0572 | 391.0565 |
| 4448 | M612T10_ | 7.790018 | 2.961627 | 1.17292  | 0.303303 | 0.437784 | UP   | 612.2644 | 612.2638 |
| 4449 | M331T10_ | 6.155799 | 2.621946 | 1.166419 | 0.303324 | 0.437786 | UP   | 331.4895 | 331.4891 |
| 4450 | M1663T10 | 6.202593 | 2.632872 | 1.166106 | 0.303462 | 0.437802 | UP   | 1663.376 | 1663.373 |
| 4451 | M270T28_ | 3.130197 | -1.64625 | -1.1669  | 0.303505 | 0.437807 | DOWN | 270.212  | 270.2118 |
| 4452 | M405T14  | 1.660946 | 0.732005 | 1.099622 | 0.303524 | 0.437809 | UP   | 405.2273 | 405.2267 |
| 4453 | M584T40  | 3.388907 | 1.76082  | 1.172577 | 0.30359  | 0.437817 | UP   | 584.4735 | 584.472  |
| 4454 | M761T10_ | 5.568091 | 2.477183 | 1.165789 | 0.303631 | 0.437822 | UP   | 761.3366 | 761.336  |
| 4455 | M342T9_3 | 3.612769 | 1.853105 | 1.131975 | 0.303683 | 0.437828 | UP   | 341.9399 | 341.9393 |
| 4456 | M673T40  | 4.032512 | 2.011679 | 1.174278 | 0.303709 | 0.437831 | UP   | 672.5262 | 672.5248 |
| 4457 | M242T10  | 2.019786 | 1.014202 | 1.100869 | 0.303723 | 0.437832 | UP   | 242.1753 | 242.1745 |
| 4458 | M350T9_5 | 5.667228 | 2.502643 | 1.162725 | 0.303812 | 0.437843 | UP   | 350.0588 | 350.0587 |
| 4459 | M396T18_ | 1.680439 | 0.748838 | 1.099222 | 0.303838 | 0.437846 | UP   | 395.5849 | 395.5843 |
| 4460 | M718T40  | 4.197238 | 2.06944  | 1.173545 | 0.303934 | 0.437857 | UP   | 717.5559 | 717.5548 |
| 4461 | M251T11_ | 4.248323 | 2.086894 | 1.15642  | 0.30414  | 0.437881 | UP   | 251.0251 | 251.0247 |
| 4462 | M443T33_ | 2.569657 | 1.361576 | 1.162401 | 0.304159 | 0.437883 | UP   | 443.1494 | 443.1493 |
| 4463 | M614T10_ | 8.37767  | 3.066549 | 1.170628 | 0.304213 | 0.437889 | UP   | 613.85   | 613.8484 |
| 4464 | M483T44_ | 1.158055 | 0.211703 | 1.106563 | 0.304233 | 0.437892 | UP   | 483.3622 | 483.3614 |

|      |          |          |          |          |          |          |      |          |          |
|------|----------|----------|----------|----------|----------|----------|------|----------|----------|
| 4465 | M490T26_ | 2.307501 | 1.206331 | 1.11554  | 0.304243 | 0.437893 | UP   | 490.1763 | 490.176  |
| 4466 | M459T10  | 2.548818 | 1.349828 | 1.11588  | 0.304307 | 0.4379   | UP   | 459.1802 | 459.1795 |
| 4467 | M588T39  | 1.854312 | 0.890884 | 1.111097 | 0.304315 | 0.437901 | UP   | 587.9259 | 587.9257 |
| 4468 | M288T9   | 2.248594 | 1.169023 | 1.145571 | 0.304486 | 0.437921 | UP   | 287.9783 | 287.9748 |
| 4469 | M217T22  | 1.923857 | 0.944002 | 1.109385 | 0.304494 | 0.437922 | UP   | 217.016  | 217.0153 |
| 4470 | M327T31_ | 2.175483 | 1.121336 | 1.134607 | 0.304706 | 0.437947 | UP   | 326.5957 | 326.5956 |
| 4471 | M370T12  | 1.672687 | 0.742168 | 1.096944 | 0.304722 | 0.437948 | UP   | 370.2591 | 370.2586 |
| 4472 | M350T10_ | 8.00913  | 3.001645 | 1.168901 | 0.304906 | 0.43797  | UP   | 349.7322 | 349.7319 |
| 4473 | M609T21  | 2.868879 | -1.52049 | -1.1524  | 0.304943 | 0.437974 | DOWN | 609.1057 | 609.1044 |
| 4474 | M455T34_ | 2.008881 | 1.006392 | 1.108321 | 0.3052   | 0.438004 | UP   | 454.8295 | 454.8287 |
| 4475 | M272T27  | 2.428101 | 1.279828 | 1.14458  | 0.305213 | 0.438005 | UP   | 272.2949 | 272.2946 |
| 4476 | M318T26  | 1.540052 | 0.622979 | 1.096186 | 0.305335 | 0.438019 | UP   | 318.3005 | 318.3001 |
| 4477 | M674T9   | 4.531918 | 2.180122 | 1.14678  | 0.305399 | 0.438027 | UP   | 673.8828 | 673.8822 |
| 4478 | M598T29  | 1.846633 | 0.884897 | 1.097782 | 0.305405 | 0.438027 | UP   | 598.2594 | 598.2583 |
| 4479 | M439T30  | 47.25942 | 5.56253  | 1.173946 | 0.305536 | 0.438042 | UP   | 439.1341 | 439.1336 |
| 4480 | M1745T10 | 4.037385 | 2.013421 | 1.137295 | 0.305819 | 0.438075 | UP   | 1745.477 | 1745.476 |
| 4481 | M408T24  | 2.016191 | 1.011632 | 1.098613 | 0.305844 | 0.438078 | UP   | 408.147  | 408.1461 |
| 4482 | M454T20  | 2.255669 | 1.173556 | 1.093872 | 0.305861 | 0.43808  | UP   | 454.0249 | 454.0247 |
| 4483 | M410T10_ | 2.090578 | 1.063902 | 1.10372  | 0.30589  | 0.438083 | UP   | 410.3382 | 410.3365 |
| 4484 | M374T21  | 2.122401 | 1.085697 | 1.106972 | 0.305898 | 0.438084 | UP   | 373.7715 | 373.7706 |
| 4485 | M367T9_1 | 7.245659 | 2.857117 | 1.163902 | 0.305944 | 0.438089 | UP   | 366.8228 | 366.8222 |
| 4486 | M442T22_ | 2.051303 | 1.036541 | 1.095106 | 0.30603  | 0.438099 | UP   | 442.045  | 442.0444 |
| 4487 | M235T27  | 1.532964 | 0.616324 | 1.094629 | 0.306069 | 0.438104 | UP   | 235.1695 | 235.1692 |
| 4488 | M555T30  | 2.235081 | -1.16033 | -1.13643 | 0.306239 | 0.438123 | DOWN | 555.2911 | 555.2909 |
| 4489 | M681T10_ | 3.155785 | 1.657999 | 1.152614 | 0.306255 | 0.438125 | UP   | 680.9289 | 680.9275 |
| 4490 | M724T10  | 3.712046 | 1.892215 | 1.143594 | 0.306286 | 0.438128 | UP   | 724.4522 | 724.4521 |
| 4491 | M341T35_ | 1.661474 | 0.732463 | 1.098686 | 0.306294 | 0.438129 | UP   | 341.3245 | 341.3237 |
| 4492 | M260T10  | 1.85883  | 0.894395 | 1.094068 | 0.306311 | 0.438131 | UP   | 260.2052 | 260.2044 |
| 4493 | M336T28_ | 1.713342 | 0.776813 | 1.119769 | 0.306398 | 0.438141 | UP   | 336.311  | 336.3107 |
| 4494 | M686T9_2 | 4.415415 | 2.142549 | 1.142635 | 0.306446 | 0.438147 | UP   | 686.2292 | 686.2278 |
| 4495 | M489T9_2 | 4.719829 | 2.238735 | 1.146286 | 0.306552 | 0.438159 | UP   | 488.8131 | 488.8129 |
| 4496 | M339T10_ | 3.554194 | 1.829523 | 1.12455  | 0.306564 | 0.43816  | UP   | 338.594  | 338.5938 |
| 4497 | M254T18  | 2.265191 | 1.179632 | 1.118464 | 0.306697 | 0.438176 | UP   | 254.2482 | 254.2477 |
| 4498 | M484T10  | 1.93821  | 0.954725 | 1.097334 | 0.306699 | 0.438176 | UP   | 484.3385 | 484.3371 |
| 4499 | M486T9_1 | 2.883747 | 1.527945 | 1.125735 | 0.306717 | 0.438178 | UP   | 486.2038 | 486.2037 |
| 4500 | M1568T10 | 7.077474 | 2.823235 | 1.158997 | 0.306884 | 0.438197 | UP   | 1568.359 | 1568.359 |
| 4501 | M349T27_ | 1.943744 | 0.958838 | 1.091777 | 0.306891 | 0.438198 | UP   | 348.5879 | 348.5877 |
| 4502 | M425T39  | 2.790109 | 1.480322 | 1.16276  | 0.307136 | 0.438226 | UP   | 425.1539 | 425.1536 |
| 4503 | M623T43  | 1.161783 | 0.216341 | 1.10253  | 0.307237 | 0.438237 | UP   | 623.4529 | 623.4519 |
| 4504 | M312T12  | 1.898106 | 0.92456  | 1.091077 | 0.307324 | 0.438247 | UP   | 312.181  | 312.1805 |
| 4505 | M669T41  | 1.958412 | -0.96968 | -1.11161 | 0.307383 | 0.438254 | DOWN | 669.3502 | 669.3502 |
| 4506 | M692T34  | 2.713345 | 1.440073 | 1.147035 | 0.307499 | 0.438267 | UP   | 691.5302 | 691.5295 |
| 4507 | M342T10_ | 1.740933 | 0.799861 | 1.089885 | 0.307501 | 0.438267 | UP   | 342.2754 | 342.2745 |
| 4508 | M257T22  | 2.076837 | -1.05439 | -1.13351 | 0.307519 | 0.438269 | DOWN | 257.0882 | 257.0876 |
| 4509 | M645T34  | 2.850544 | 1.511237 | 1.141139 | 0.307557 | 0.438274 | UP   | 645.4982 | 645.4971 |
| 4510 | M349T9_5 | 8.630179 | 3.10939  | 1.16277  | 0.307619 | 0.438281 | UP   | 349.3626 | 349.3625 |
| 4511 | M729T9_2 | 4.50485  | 2.171479 | 1.140392 | 0.307731 | 0.438293 | UP   | 728.675  | 728.6743 |



|      |          |          |          |          |          |          |      |          |          |
|------|----------|----------|----------|----------|----------|----------|------|----------|----------|
| 4512 | M1764T10 | 9.649301 | 3.270424 | 1.161964 | 0.307848 | 0.438307 | UP   | 1764.187 | 1764.184 |
| 4513 | M465T9_1 | 4.931055 | 2.301896 | 1.144849 | 0.307924 | 0.438315 | UP   | 464.7705 | 464.7698 |
| 4514 | M696T9_2 | 2.625311 | 1.392488 | 1.123091 | 0.307989 | 0.438323 | UP   | 696.4386 | 696.4369 |
| 4515 | M269T28_ | 2.87552  | -1.52382 | -1.15477 | 0.308054 | 0.43833  | DOWN | 269.2088 | 269.2083 |
| 4516 | M512T45  | 1.311429 | -0.39114 | -1.13794 | 0.308134 | 0.438339 | DOWN | 512.2693 | 512.2692 |
| 4517 | M574T31  | 1.742262 | 0.800962 | 1.088809 | 0.30816  | 0.438342 | UP   | 574.3375 | 574.3364 |
| 4518 | M689T22  | 2.179566 | 1.124041 | 1.088775 | 0.308338 | 0.438362 | UP   | 688.9744 | 688.9734 |
| 4519 | M614T10_ | 10.90661 | 3.447131 | 1.162417 | 0.308383 | 0.438367 | UP   | 613.9814 | 613.9805 |
| 4520 | M198T22  | 2.819152 | -1.49526 | -1.15607 | 0.308521 | 0.438383 | DOWN | 198.1854 | 198.1849 |
| 4521 | M268T26  | 2.062894 | 1.04467  | 1.105019 | 0.308527 | 0.438384 | UP   | 268.0997 | 268.0991 |
| 4522 | M203T10  | 3.645751 | 1.866216 | 1.154683 | 0.308583 | 0.43839  | UP   | 203.3941 | 203.3937 |
| 4523 | M675T9_1 | 4.433757 | 2.14853  | 1.137793 | 0.308702 | 0.438403 | UP   | 674.8165 | 674.8161 |
| 4524 | M680T28  | 2.488371 | 1.315202 | 1.112391 | 0.30882  | 0.438417 | UP   | 680.1377 | 680.1372 |
| 4525 | M506T16  | 1.672977 | 0.742417 | 1.089061 | 0.308938 | 0.43843  | UP   | 506.3953 | 506.3944 |
| 4526 | M535T29_ | 2.543085 | 1.34658  | 1.099042 | 0.309003 | 0.438437 | UP   | 535.0593 | 535.0592 |
| 4527 | M671T34  | 2.424749 | 1.277835 | 1.121924 | 0.309011 | 0.438438 | UP   | 671.495  | 671.4939 |
| 4528 | M229T10_ | 4.253925 | 2.088794 | 1.137267 | 0.309017 | 0.438439 | UP   | 229.1354 | 229.1351 |
| 4529 | M428T29  | 2.17882  | 1.123547 | 1.104785 | 0.309029 | 0.43844  | UP   | 428.0457 | 428.0454 |
| 4530 | M338T32_ | 1.884009 | 0.913806 | 1.124694 | 0.309084 | 0.438446 | UP   | 338.1611 | 338.1606 |
| 4531 | M1651T10 | 7.483444 | 2.903702 | 1.156069 | 0.309167 | 0.438456 | UP   | 1650.972 | 1650.97  |
| 4532 | M470T23  | 5.107447 | 2.352602 | 1.162101 | 0.309187 | 0.438458 | UP   | 470.2803 | 470.2801 |
| 4533 | M203T12  | 1.558575 | 0.640228 | 1.105253 | 0.309199 | 0.438459 | UP   | 203.1278 | 203.1277 |
| 4534 | M356T24_ | 2.19024  | 1.131089 | 1.107281 | 0.3093   | 0.438471 | UP   | 356.2436 | 356.2435 |
| 4535 | M455T13_ | 2.311416 | 1.208777 | 1.097057 | 0.309303 | 0.438471 | UP   | 454.8511 | 454.8511 |
| 4536 | M730T9_3 | 4.429797 | 2.147241 | 1.134799 | 0.309578 | 0.438502 | UP   | 730.3142 | 730.3139 |
| 4537 | M451T10  | 1.960218 | -0.97101 | -1.10349 | 0.309619 | 0.438507 | DOWN | 451.1598 | 451.1589 |
| 4538 | M453T9_4 | 2.51673  | 1.331551 | 1.153713 | 0.309758 | 0.438522 | UP   | 453.1046 | 453.0962 |
| 4539 | M273T25  | 5.496305 | -2.45846 | -1.15866 | 0.309793 | 0.438526 | DOWN | 273.1098 | 273.1094 |
| 4540 | M197T24  | 1.815641 | -0.86048 | -1.15372 | 0.309824 | 0.43853  | DOWN | 197.1536 | 197.1533 |
| 4541 | M1647T10 | 6.437909 | 2.686592 | 1.149171 | 0.30995  | 0.438544 | UP   | 1647.186 | 1647.184 |
| 4542 | M758T10_ | 5.616389 | 2.489643 | 1.148928 | 0.309956 | 0.438544 | UP   | 757.786  | 757.7857 |
| 4543 | M574T29_ | 1.807508 | 0.854002 | 1.086318 | 0.310006 | 0.43855  | UP   | 574.2594 | 574.2584 |
| 4544 | M257T23  | 1.865777 | 0.899777 | 1.086362 | 0.310021 | 0.438552 | UP   | 256.5825 | 256.5823 |
| 4545 | M585T40  | 3.738107 | 1.902308 | 1.157232 | 0.310023 | 0.438552 | UP   | 585.4769 | 585.4756 |
| 4546 | M628T40  | 3.685588 | 1.881895 | 1.154734 | 0.310249 | 0.438588 | UP   | 628.4998 | 628.4987 |
| 4547 | M783T10_ | 3.483243 | 1.800431 | 1.135124 | 0.310419 | 0.438616 | UP   | 783.4793 | 783.4791 |
| 4548 | M439T45_ | 1.116695 | 0.159235 | 1.099612 | 0.310498 | 0.438628 | UP   | 438.8343 | 438.8333 |
| 4549 | M313T29  | 1.953999 | 0.96643  | 1.084988 | 0.31052  | 0.438632 | UP   | 312.6335 | 312.6331 |
| 4550 | M179T18  | 1.387857 | 0.472858 | 1.084156 | 0.310547 | 0.438636 | UP   | 179.1068 | 179.1067 |
| 4551 | M674T40  | 4.331563 | 2.114888 | 1.155686 | 0.310698 | 0.43866  | UP   | 673.5296 | 673.5285 |
| 4552 | M514T44_ | 1.178412 | 0.236844 | 1.082143 | 0.310803 | 0.438677 | UP   | 514.3899 | 514.3891 |
| 4553 | M272T9   | 2.15734  | -1.10925 | -1.10081 | 0.310823 | 0.43868  | DOWN | 272.1856 | 272.1855 |
| 4554 | M562T10  | 2.437276 | 1.28527  | 1.132003 | 0.310852 | 0.438685 | UP   | 562.3564 | 562.354  |
| 4555 | M357T10_ | 7.391572 | 2.885881 | 1.154662 | 0.310957 | 0.438702 | UP   | 357.2365 | 357.2362 |
| 4556 | M735T43_ | 1.246833 | 0.318269 | 1.081583 | 0.310972 | 0.438704 | UP   | 735.0231 | 735.0216 |
| 4557 | M560T32_ | 3.842536 | -1.94206 | -1.14839 | 0.311007 | 0.43871  | DOWN | 560.3117 | 560.3057 |
| 4558 | M730T9_2 | 4.393741 | 2.13545  | 1.130199 | 0.311023 | 0.438712 | UP   | 729.7884 | 729.7877 |

|      |          |          |          |          |          |          |      |          |          |
|------|----------|----------|----------|----------|----------|----------|------|----------|----------|
| 4559 | M647T34  | 3.243764 | 1.697669 | 1.13899  | 0.311239 | 0.438763 | UP   | 646.5011 | 646.4996 |
| 4560 | M380T12  | 2.021906 | 1.015716 | 1.090362 | 0.311284 | 0.438774 | UP   | 380.1328 | 380.1325 |
| 4561 | M522T39  | 2.166172 | 1.115148 | 1.108823 | 0.311445 | 0.438812 | UP   | 521.886  | 521.8859 |
| 4562 | M483T31  | 3.496043 | 1.805723 | 1.136854 | 0.3115   | 0.438825 | UP   | 483.4026 | 483.4021 |
| 4563 | M554T39  | 1.461865 | 0.54781  | 1.082679 | 0.311555 | 0.438838 | UP   | 554.4415 | 554.4406 |
| 4564 | M516T28  | 1.778975 | -0.83105 | -1.08457 | 0.311672 | 0.438865 | DOWN | 516.3062 | 516.3054 |
| 4565 | M505T10  | 2.550543 | 1.350804 | 1.110929 | 0.311848 | 0.438907 | UP   | 505.1857 | 505.1853 |
| 4566 | M242T18_ | 2.644998 | 1.403267 | 1.143714 | 0.311874 | 0.438913 | UP   | 242.2481 | 242.2479 |
| 4567 | M376T9_6 | 3.87864  | 1.955551 | 1.122472 | 0.311885 | 0.438916 | UP   | 376.3102 | 376.3101 |
| 4568 | M412T31_ | 1.992766 | 0.994773 | 1.107261 | 0.311915 | 0.438923 | UP   | 412.3784 | 412.3778 |
| 4569 | M369T30  | 1.818689 | 0.862899 | 1.081592 | 0.312048 | 0.438954 | UP   | 369.1726 | 369.1721 |
| 4570 | M480T26_ | 3.341526 | 1.740507 | 1.111444 | 0.31207  | 0.438959 | UP   | 480.0407 | 480.0404 |
| 4571 | M599T29_ | 1.880512 | 0.911126 | 1.080687 | 0.312252 | 0.439002 | UP   | 599.2623 | 599.2615 |
| 4572 | M341T9_1 | 4.135505 | 2.048064 | 1.143454 | 0.31247  | 0.439054 | UP   | 340.9715 | 340.9708 |
| 4573 | M496T31_ | 1.768876 | 0.822833 | 1.078575 | 0.312523 | 0.439066 | UP   | 496.4294 | 496.4285 |
| 4574 | M685T9_1 | 4.563393 | 2.190107 | 1.128598 | 0.312541 | 0.43907  | UP   | 685.272  | 685.2708 |
| 4575 | M662T9   | 2.967793 | 1.56939  | 1.108817 | 0.312731 | 0.439115 | UP   | 662.3869 | 662.3846 |
| 4576 | M226T23  | 1.746856 | 0.804761 | 1.08079  | 0.312731 | 0.439115 | UP   | 226.0686 | 226.0685 |
| 4577 | M1045T9_ | 11.31676 | 3.500389 | 1.150533 | 0.312798 | 0.43913  | UP   | 1045.319 | 1045.317 |
| 4578 | M299T27_ | 1.888514 | 0.917252 | 1.077939 | 0.312864 | 0.439146 | UP   | 298.6255 | 298.6254 |
| 4579 | M888T30  | 2.335929 | 1.223997 | 1.081369 | 0.312962 | 0.439169 | UP   | 888.1418 | 888.1412 |
| 4580 | M217T10_ | 6.52158  | 2.705221 | 1.143296 | 0.312995 | 0.439177 | UP   | 216.5287 | 216.5285 |
| 4581 | M312T30_ | 2.187113 | 1.129028 | 1.079778 | 0.313188 | 0.439222 | UP   | 311.6436 | 311.6434 |
| 4582 | M368T9_2 | 6.63149  | 2.729333 | 1.142287 | 0.313289 | 0.439246 | UP   | 367.6187 | 367.6183 |
| 4583 | M741T44  | 1.520287 | 0.604344 | 1.097958 | 0.313346 | 0.439259 | UP   | 741.3557 | 741.3548 |
| 4584 | M606T11  | 2.243174 | 1.165541 | 1.075528 | 0.313527 | 0.439301 | UP   | 606.0951 | 606.0944 |
| 4585 | M757T10_ | 6.230106 | 2.639257 | 1.140263 | 0.313557 | 0.439308 | UP   | 757.3019 | 757.3012 |
| 4586 | M736T9_2 | 7.573886 | 2.921034 | 1.143241 | 0.313626 | 0.439324 | UP   | 736.135  | 736.1345 |
| 4587 | M632T12  | 1.84784  | 0.88584  | 1.0838   | 0.313749 | 0.439353 | UP   | 632.4753 | 632.4747 |
| 4588 | M358T9_6 | 3.842526 | 1.942055 | 1.118518 | 0.313759 | 0.439355 | UP   | 358.456  | 358.4555 |
| 4589 | M842T30_ | 2.465545 | 1.301907 | 1.074837 | 0.313793 | 0.439363 | UP   | 842.1216 | 842.1206 |
| 4590 | M615T10_ | 1.806047 | 0.852835 | 1.075751 | 0.313806 | 0.439366 | UP   | 615.4246 | 615.4223 |
| 4591 | M346T16  | 1.310519 | -0.39014 | -1.07738 | 0.313994 | 0.43941  | DOWN | 346.1844 | 346.1843 |
| 4592 | M173T9_4 | 4.606375 | 2.203632 | 1.144464 | 0.31408  | 0.43943  | UP   | 173.3257 | 173.322  |
| 4593 | M173T14  | 1.871289 | 0.904033 | 1.084075 | 0.314116 | 0.439439 | UP   | 173.1536 | 173.1534 |
| 4594 | M212T10_ | 5.978958 | 2.579894 | 1.140846 | 0.314231 | 0.439465 | UP   | 212.0826 | 212.0824 |
| 4595 | M625T10  | 2.0851   | 1.060117 | 1.08758  | 0.314295 | 0.43948  | UP   | 625.4184 | 625.4171 |
| 4596 | M676T9_3 | 4.198985 | 2.070041 | 1.118497 | 0.314297 | 0.439481 | UP   | 676.2872 | 676.2868 |
| 4597 | M477T34_ | 1.948895 | 0.962657 | 1.083297 | 0.314299 | 0.439481 | UP   | 476.8425 | 476.8414 |
| 4598 | M613T10_ | 5.011409 | 2.325216 | 1.129448 | 0.314632 | 0.439559 | UP   | 612.9911 | 612.9906 |
| 4599 | M736T9_1 | 6.534698 | 2.708121 | 1.141529 | 0.314733 | 0.439582 | UP   | 735.5382 | 735.5376 |
| 4600 | M760T10_ | 3.534658 | 1.821571 | 1.127377 | 0.314798 | 0.439597 | UP   | 760.4633 | 760.4631 |
| 4601 | M204T10_ | 3.78276  | 1.919439 | 1.139856 | 0.314907 | 0.439623 | UP   | 204.1195 | 204.119  |
| 4602 | M600T34  | 2.824056 | 1.497769 | 1.122309 | 0.314968 | 0.439637 | UP   | 600.4684 | 600.4673 |
| 4603 | M757T10_ | 4.851832 | 2.27853  | 1.125238 | 0.315172 | 0.439684 | UP   | 756.9973 | 756.9963 |
| 4604 | M673T9_2 | 3.584691 | 1.841849 | 1.111304 | 0.315341 | 0.439723 | UP   | 673.3601 | 673.3599 |
| 4605 | M596T10  | 3.025842 | 1.597337 | 1.086979 | 0.315501 | 0.43976  | UP   | 595.8282 | 595.8271 |

|      |          |          |          |          |          |          |      |          |          |
|------|----------|----------|----------|----------|----------|----------|------|----------|----------|
| 4606 | M372T14  | 2.740468 | 1.454422 | 1.080673 | 0.315623 | 0.439788 | UP   | 371.9831 | 371.9825 |
| 4607 | M477T39  | 2.444416 | 1.28949  | 1.112859 | 0.315646 | 0.439794 | UP   | 477.3582 | 477.3577 |
| 4608 | M380T35  | 2.668887 | 1.416238 | 1.117015 | 0.315649 | 0.439794 | UP   | 380.3371 | 380.3365 |
| 4609 | M763T40  | 4.043827 | 2.015721 | 1.137831 | 0.315709 | 0.439808 | UP   | 762.5853 | 762.5838 |
| 4610 | M932T41  | 2.098466 | 1.069335 | 1.103405 | 0.315724 | 0.439811 | UP   | 932.1825 | 932.1818 |
| 4611 | M306T21_ | 4.27869  | 2.097169 | 1.142592 | 0.315961 | 0.439866 | UP   | 306.155  | 306.1547 |
| 4612 | M496T10  | 3.642643 | 1.864985 | 1.120381 | 0.315973 | 0.439869 | UP   | 496.3806 | 496.3785 |
| 4613 | M1885T10 | 2.314641 | 1.210788 | 1.095108 | 0.315986 | 0.439872 | UP   | 1884.91  | 1884.905 |
| 4614 | M230T12_ | 1.777764 | 0.830064 | 1.069732 | 0.316138 | 0.439907 | UP   | 230.1905 | 230.19   |
| 4615 | M659T9_1 | 3.355709 | 1.746618 | 1.107133 | 0.316172 | 0.439915 | UP   | 658.5479 | 658.5465 |
| 4616 | M696T10_ | 3.970796 | 1.989428 | 1.141643 | 0.316345 | 0.439955 | UP   | 695.5342 | 695.5317 |
| 4617 | M280T28  | 2.360513 | 1.239101 | 1.095372 | 0.316516 | 0.439994 | UP   | 279.6101 | 279.6097 |
| 4618 | M601T30  | 2.058348 | 1.041487 | 1.084308 | 0.316543 | 0.44     | UP   | 601.4368 | 601.4359 |
| 4619 | M607T21  | 2.405133 | -1.26612 | -1.11785 | 0.316682 | 0.440032 | DOWN | 607.109  | 607.1078 |
| 4620 | M488T41  | 1.332317 | -0.41394 | -1.13449 | 0.316977 | 0.4401   | DOWN | 488.2693 | 488.2692 |
| 4621 | M348T31_ | 1.704617 | -0.76945 | -1.13354 | 0.316983 | 0.440101 | DOWN | 348.2145 | 348.2143 |
| 4622 | M1976T9  | 3.936038 | 1.976744 | 1.128409 | 0.317036 | 0.440114 | UP   | 1976.097 | 1976.092 |
| 4623 | M359T35  | 10.2492  | -3.35744 | -1.14233 | 0.317038 | 0.440114 | DOWN | 359.3711 | 359.3708 |
| 4624 | M372T24_ | 1.730155 | -0.7909  | -1.10643 | 0.317065 | 0.44012  | DOWN | 372.3264 | 372.3259 |
| 4625 | M334T32_ | 6.823792 | 2.770574 | 1.131206 | 0.317092 | 0.440126 | UP   | 333.5892 | 333.5891 |
| 4626 | M533T25  | 2.531819 | 1.340174 | 1.114369 | 0.31713  | 0.440135 | UP   | 533.3208 | 533.3207 |
| 4627 | M687T10_ | 2.393424 | 1.259076 | 1.079652 | 0.317194 | 0.44015  | UP   | 686.7116 | 686.7087 |
| 4628 | M350T9_9 | 4.885534 | 2.288516 | 1.120843 | 0.317197 | 0.44015  | UP   | 350.2768 | 350.2767 |
| 4629 | M728T29_ | 1.858857 | -0.89442 | -1.0807  | 0.317208 | 0.440153 | DOWN | 728.2176 | 728.2165 |
| 4630 | M676T9_1 | 3.903916 | 1.964922 | 1.110074 | 0.317249 | 0.440162 | UP   | 675.7623 | 675.762  |
| 4631 | M572T30_ | 1.75957  | -0.81522 | -1.10959 | 0.317313 | 0.440177 | DOWN | 571.5068 | 571.5063 |
| 4632 | M482T9_1 | 2.864677 | 1.518372 | 1.095483 | 0.317467 | 0.440212 | UP   | 481.8045 | 481.8027 |
| 4633 | M265T26  | 2.500989 | -1.3225  | -1.12715 | 0.317696 | 0.440265 | DOWN | 265.2164 | 265.2159 |
| 4634 | M210T22  | 2.180342 | -1.12455 | -1.12486 | 0.317844 | 0.440298 | DOWN | 210.1572 | 210.1567 |
| 4635 | M703T43_ | 1.162485 | 0.217212 | 1.065398 | 0.317943 | 0.440321 | UP   | 702.9923 | 702.991  |
| 4636 | M719T40  | 4.436476 | 2.149414 | 1.134899 | 0.317989 | 0.440331 | UP   | 718.5591 | 718.558  |
| 4637 | M439T32  | 1.773481 | 0.826584 | 1.066437 | 0.318026 | 0.44034  | UP   | 439.3461 | 439.3458 |
| 4638 | M420T13  | 14.12612 | -3.82029 | -1.13955 | 0.318033 | 0.440342 | DOWN | 420.2214 | 420.2211 |
| 4639 | M634T20  | 2.058223 | -1.0414  | -1.10063 | 0.318057 | 0.440347 | DOWN | 634.1985 | 634.1984 |
| 4640 | M420T37  | 1.330107 | -0.41154 | -1.08416 | 0.318071 | 0.44035  | DOWN | 420.3472 | 420.3471 |
| 4641 | M489T43  | 1.094696 | 0.13053  | 1.071471 | 0.318123 | 0.440362 | UP   | 489.3474 | 489.347  |
| 4642 | M638T43_ | 1.164931 | 0.220244 | 1.065168 | 0.318199 | 0.440379 | UP   | 637.9561 | 637.9551 |
| 4643 | M389T23_ | 2.171882 | 1.118945 | 1.074781 | 0.318262 | 0.440394 | UP   | 389.1008 | 389.1    |
| 4644 | M413T31_ | 2.102909 | 1.072387 | 1.097833 | 0.318424 | 0.440431 | UP   | 413.3817 | 413.3811 |
| 4645 | M601T34  | 2.991405 | 1.580823 | 1.116652 | 0.318507 | 0.44045  | UP   | 601.4717 | 601.4707 |
| 4646 | M443T29_ | 2.882803 | 1.527472 | 1.090107 | 0.318635 | 0.440479 | UP   | 443.0791 | 443.0789 |
| 4647 | M738T32  | 1.768615 | -0.82262 | -1.06397 | 0.318686 | 0.44049  | DOWN | 738.1935 | 738.1929 |
| 4648 | M675T9_2 | 3.763849 | 1.912209 | 1.102237 | 0.318694 | 0.440492 | UP   | 675.2942 | 675.2939 |
| 4649 | M678T10_ | 4.431713 | 2.147864 | 1.132797 | 0.318979 | 0.440557 | UP   | 677.5147 | 677.5133 |
| 4650 | M1664T10 | 5.434287 | 2.442091 | 1.120926 | 0.319244 | 0.440617 | UP   | 1664.369 | 1664.367 |
| 4651 | M545T32  | 4.561782 | -2.1896  | -1.12769 | 0.3195   | 0.440675 | DOWN | 545.341  | 545.3399 |
| 4652 | M383T13  | 1.791176 | 0.840907 | 1.079888 | 0.319656 | 0.44071  | UP   | 382.7881 | 382.788  |

|      |          |          |          |          |          |          |      |          |          |
|------|----------|----------|----------|----------|----------|----------|------|----------|----------|
| 4653 | M304T29_ | 1.756073 | -0.81235 | -1.07872 | 0.31967  | 0.440714 | DOWN | 303.6471 | 303.6466 |
| 4654 | M455T20_ | 1.931051 | -0.94939 | -1.07476 | 0.319779 | 0.440738 | DOWN | 455.3352 | 455.3342 |
| 4655 | M676T41  | 2.164442 | -1.114   | -1.08548 | 0.319926 | 0.440771 | DOWN | 676.2647 | 676.2638 |
| 4656 | M320T24_ | 8.7652   | 3.131787 | 1.134284 | 0.320013 | 0.440791 | UP   | 320.2301 | 320.23   |
| 4657 | M422T22_ | 5.3485   | -2.41913 | -1.13052 | 0.320113 | 0.440814 | DOWN | 422.1265 | 422.1262 |
| 4658 | M515T17_ | 1.807445 | 0.853952 | 1.061146 | 0.320149 | 0.440822 | UP   | 514.8611 | 514.86   |
| 4659 | M443T30_ | 2.18411  | 1.127046 | 1.106753 | 0.320172 | 0.440827 | UP   | 443.2769 | 443.2764 |
| 4660 | M449T9   | 1.716897 | -0.7798  | -1.06976 | 0.320201 | 0.440834 | DOWN | 449.1706 | 449.1646 |
| 4661 | M489T30_ | 7.927986 | 2.986955 | 1.129819 | 0.320208 | 0.440835 | UP   | 489.1468 | 489.1447 |
| 4662 | M681T21  | 2.062215 | 1.044195 | 1.060485 | 0.320314 | 0.440859 | UP   | 681.4417 | 681.4399 |
| 4663 | M1973T10 | 4.039974 | 2.014346 | 1.118203 | 0.32047  | 0.440894 | UP   | 1973.176 | 1973.171 |
| 4664 | M694T31_ | 1.898438 | 0.924813 | 1.074149 | 0.320599 | 0.440923 | UP   | 694.1946 | 694.1945 |
| 4665 | M369T10_ | 7.755389 | 2.955199 | 1.126117 | 0.320646 | 0.440934 | UP   | 368.6213 | 368.621  |
| 4666 | M387T31_ | 2.08582  | 1.060614 | 1.110539 | 0.320823 | 0.440974 | UP   | 386.561  | 386.5605 |
| 4667 | M367T11  | 1.785397 | 0.836245 | 1.058038 | 0.321029 | 0.44102  | UP   | 367.2687 | 367.2682 |
| 4668 | M325T33  | 1.965184 | -0.97466 | -1.12082 | 0.321043 | 0.441023 | DOWN | 325.1779 | 325.1773 |
| 4669 | M383T10_ | 1.780761 | 0.832494 | 1.058029 | 0.321055 | 0.441026 | UP   | 383.2546 | 383.2532 |
| 4670 | M732T32  | 1.729701 | -0.79052 | -1.06191 | 0.321109 | 0.441038 | DOWN | 732.1967 | 732.1962 |
| 4671 | M216T10_ | 5.019099 | 2.327429 | 1.113822 | 0.32112  | 0.44104  | UP   | 216.1223 | 216.1223 |
| 4672 | M387T19  | 2.693771 | 1.429627 | 1.081877 | 0.321177 | 0.441053 | UP   | 386.9754 | 386.9748 |
| 4673 | M244T10  | 2.658463 | 1.410592 | 1.103351 | 0.321178 | 0.441053 | UP   | 244.0914 | 244.0906 |
| 4674 | M643T30  | 2.621153 | 1.390201 | 1.063213 | 0.321199 | 0.441058 | UP   | 643.1112 | 643.1109 |
| 4675 | M675T40  | 5.384275 | 2.428752 | 1.127966 | 0.321221 | 0.441063 | UP   | 674.5323 | 674.5299 |
| 4676 | M556T35  | 2.868575 | 1.520334 | 1.108056 | 0.321278 | 0.441076 | UP   | 556.442  | 556.4409 |
| 4677 | M633T22_ | 1.98149  | 0.986586 | 1.063443 | 0.321469 | 0.441119 | UP   | 633.1875 | 633.1865 |
| 4678 | M709T10_ | 7.810441 | 2.965404 | 1.122675 | 0.321559 | 0.441139 | UP   | 709.1054 | 709.1045 |
| 4679 | M272T19  | 2.256492 | 1.174082 | 1.09408  | 0.321618 | 0.441152 | UP   | 272.0946 | 272.0946 |
| 4680 | M646T26  | 30.45728 | 4.928715 | 1.129266 | 0.3218   | 0.441193 | UP   | 646.4745 | 646.4743 |
| 4681 | M525T43_ | 1.185386 | 0.245357 | 1.061705 | 0.321855 | 0.441205 | UP   | 525.0429 | 525.042  |
| 4682 | M1988T9  | 3.674901 | 1.877705 | 1.113576 | 0.321878 | 0.44121  | UP   | 1988.127 | 1988.119 |
| 4683 | M277T17  | 3.212808 | -1.68383 | -1.12366 | 0.322004 | 0.441238 | DOWN | 277.1411 | 277.1406 |
| 4684 | M473T9_4 | 2.018178 | 1.013054 | 1.062601 | 0.322323 | 0.44131  | UP   | 473.3406 | 473.3402 |
| 4685 | M378T10_ | 6.305445 | 2.656598 | 1.116589 | 0.322359 | 0.441318 | UP   | 378.0438 | 378.0437 |
| 4686 | M497T37  | 1.522789 | -0.60672 | -1.06211 | 0.32236  | 0.441318 | DOWN | 497.4868 | 497.4861 |
| 4687 | M778T10  | 1.945239 | 0.959947 | 1.058007 | 0.322384 | 0.441323 | UP   | 778.4062 | 778.4057 |
| 4688 | M340T10_ | 3.897632 | 1.962598 | 1.114956 | 0.322549 | 0.44136  | UP   | 339.5521 | 339.5515 |
| 4689 | M624T17_ | 1.768724 | 0.822709 | 1.058511 | 0.322707 | 0.441395 | UP   | 623.9792 | 623.9781 |
| 4690 | M631T10  | 3.226833 | 1.690119 | 1.077709 | 0.322755 | 0.441406 | UP   | 630.6744 | 630.6743 |
| 4691 | M683T33_ | 1.895339 | 0.922456 | 1.061034 | 0.322758 | 0.441406 | UP   | 683.4745 | 683.4738 |
| 4692 | M211T27_ | 2.313055 | -1.2098  | -1.10745 | 0.322819 | 0.44142  | DOWN | 211.1095 | 211.1091 |
| 4693 | M613T10_ | 5.331231 | 2.414469 | 1.111037 | 0.322825 | 0.441421 | UP   | 612.7692 | 612.7686 |
| 4694 | M691T26  | 20.04883 | 4.325446 | 1.126344 | 0.322911 | 0.44144  | UP   | 690.501  | 690.5003 |
| 4695 | M710T10  | 1.734469 | 0.794494 | 1.073247 | 0.32297  | 0.441454 | UP   | 710.4699 | 710.4674 |
| 4696 | M657T9_1 | 2.37914  | 1.25044  | 1.069709 | 0.323071 | 0.441476 | UP   | 656.6414 | 656.6403 |
| 4697 | M684T9_3 | 3.61356  | 1.853421 | 1.095897 | 0.323156 | 0.441495 | UP   | 684.3059 | 684.305  |
| 4698 | M376T24  | 1.444452 | -0.53052 | -1.06558 | 0.323419 | 0.441553 | DOWN | 376.1759 | 376.1754 |
| 4699 | M792T11_ | 2.861907 | 1.516977 | 1.067997 | 0.32349  | 0.441569 | UP   | 792.3987 | 792.3976 |

|      |          |          |          |          |          |          |      |          |          |
|------|----------|----------|----------|----------|----------|----------|------|----------|----------|
| 4700 | M332T33_ | 1.620498 | -0.69644 | -1.05675 | 0.32368  | 0.441611 | DOWN | 332.2797 | 332.2795 |
| 4701 | M230T23_ | 12.99337 | 3.699703 | 1.123977 | 0.32373  | 0.441622 | UP   | 230.248  | 230.2473 |
| 4702 | M421T9   | 2.710475 | -1.43855 | -1.11341 | 0.323858 | 0.441651 | DOWN | 421.242  | 421.2417 |
| 4703 | M661T9_2 | 3.185475 | 1.671508 | 1.087931 | 0.323868 | 0.441653 | UP   | 661.4235 | 661.4219 |
| 4704 | M380T18  | 1.849027 | 0.886766 | 1.05643  | 0.323967 | 0.441675 | UP   | 380.2798 | 380.2794 |
| 4705 | M369T10_ | 1.856415 | 0.892519 | 1.05223  | 0.324041 | 0.441691 | UP   | 369.2387 | 369.2376 |
| 4706 | M602T26  | 18.90342 | 4.240575 | 1.123259 | 0.324136 | 0.441712 | UP   | 602.4481 | 602.4478 |
| 4707 | M378T29_ | 2.213884 | 1.146579 | 1.057106 | 0.324146 | 0.441714 | UP   | 378.1    | 378.0998 |
| 4708 | M247T22_ | 1.991842 | 0.994103 | 1.055444 | 0.324271 | 0.441742 | UP   | 247.0629 | 247.0626 |
| 4709 | M387T23_ | 1.819505 | 0.863546 | 1.05181  | 0.324341 | 0.441757 | UP   | 387.1368 | 387.1368 |
| 4710 | M637T40  | 1.707014 | 0.771475 | 1.05264  | 0.324345 | 0.441758 | UP   | 636.981  | 636.9807 |
| 4711 | M611T40  | 3.656288 | 1.87038  | 1.118603 | 0.324438 | 0.441779 | UP   | 611.4736 | 611.4728 |
| 4712 | M695T31_ | 1.972424 | 0.97997  | 1.054404 | 0.32449  | 0.44179  | UP   | 695.1933 | 695.1932 |
| 4713 | M544T39  | 2.243034 | 1.165451 | 1.085698 | 0.324527 | 0.441798 | UP   | 543.8994 | 543.8986 |
| 4714 | M365T29_ | 1.844013 | -0.88285 | -1.0816  | 0.324543 | 0.441802 | DOWN | 365.1358 | 365.1354 |
| 4715 | M923T32  | 1.913965 | 0.936564 | 1.050984 | 0.324569 | 0.441808 | UP   | 922.6322 | 922.6318 |
| 4716 | M281T12  | 2.257363 | 1.174638 | 1.102503 | 0.32459  | 0.441812 | UP   | 281.2308 | 281.2307 |
| 4717 | M630T44  | 1.526274 | 0.610014 | 1.050878 | 0.324661 | 0.441828 | UP   | 630.4154 | 630.4146 |
| 4718 | M412T26_ | 1.907599 | 0.931758 | 1.049901 | 0.324679 | 0.441832 | UP   | 412.1573 | 412.1564 |
| 4719 | M328T9_2 | 2.239124 | -1.16293 | -1.08987 | 0.324713 | 0.44184  | DOWN | 328.2872 | 328.287  |
| 4720 | M492T9_2 | 2.989067 | -1.5797  | -1.11111 | 0.324758 | 0.441849 | DOWN | 492.3232 | 492.323  |
| 4721 | M350T9_4 | 5.213022 | 2.38212  | 1.104032 | 0.324832 | 0.441866 | UP   | 349.8843 | 349.8842 |
| 4722 | M791T10_ | 2.970257 | 1.570588 | 1.081689 | 0.324927 | 0.441887 | UP   | 791.4949 | 791.4942 |
| 4723 | M335T25_ | 3.897804 | 1.962662 | 1.108479 | 0.324974 | 0.441897 | UP   | 335.2432 | 335.2431 |
| 4724 | M382T26  | 4.999243 | 2.32171  | 1.114181 | 0.324986 | 0.4419   | UP   | 382.3164 | 382.3108 |
| 4725 | M1042T34 | 3.012259 | 1.590846 | 1.092077 | 0.325112 | 0.441927 | UP   | 1041.736 | 1041.735 |
| 4726 | M445T10  | 2.400288 | 1.263208 | 1.067563 | 0.325146 | 0.441935 | UP   | 445.1645 | 445.1643 |
| 4727 | M357T9_1 | 5.104211 | 2.351688 | 1.107454 | 0.325357 | 0.441981 | UP   | 356.6538 | 356.6535 |
| 4728 | M575T31_ | 1.682734 | 0.750807 | 1.048    | 0.325404 | 0.441992 | UP   | 575.3409 | 575.3398 |
| 4729 | M597T31_ | 1.735642 | 0.795469 | 1.055077 | 0.325683 | 0.442053 | UP   | 597.2681 | 597.267  |
| 4730 | M157T10_ | 7.43983  | 2.89527  | 1.111965 | 0.325699 | 0.442056 | UP   | 156.814  | 156.8139 |
| 4731 | M630T40_ | 3.877626 | 1.955174 | 1.115135 | 0.325713 | 0.442059 | UP   | 629.5033 | 629.502  |
| 4732 | M277T31_ | 2.108663 | 1.076329 | 1.047674 | 0.325768 | 0.442071 | UP   | 276.6334 | 276.6332 |
| 4733 | M336T35  | 1.832398 | 0.873733 | 1.050796 | 0.325829 | 0.442085 | UP   | 336.311  | 336.3104 |
| 4734 | M340T10_ | 3.993436 | 1.997631 | 1.107128 | 0.325949 | 0.442111 | UP   | 340.0518 | 340.0512 |
| 4735 | M617T19  | 1.630641 | 0.705439 | 1.066452 | 0.325957 | 0.442113 | UP   | 617.4672 | 617.467  |
| 4736 | M566T18_ | 1.760977 | 0.816376 | 1.046427 | 0.326038 | 0.44213  | UP   | 566.4323 | 566.4313 |
| 4737 | M452T31  | 1.423803 | -0.50975 | -1.09829 | 0.326097 | 0.442143 | DOWN | 452.1816 | 452.1809 |
| 4738 | M488T30  | 1.156833 | 0.210181 | 1.047293 | 0.326118 | 0.442148 | UP   | 488.3583 | 488.3574 |
| 4739 | M338T14  | 2.599499 | 1.378233 | 1.104467 | 0.326141 | 0.442153 | UP   | 338.2177 | 338.2171 |
| 4740 | M584T29_ | 1.786558 | 0.837183 | 1.060455 | 0.32615  | 0.442155 | UP   | 584.2497 | 584.2495 |
| 4741 | M191T11  | 2.034907 | 1.024963 | 1.057706 | 0.3262   | 0.442166 | UP   | 191.1644 | 191.1642 |
| 4742 | M484T17  | 1.695901 | 0.762052 | 1.046    | 0.326239 | 0.442174 | UP   | 484.3899 | 484.3891 |
| 4743 | M470T44_ | 1.119528 | 0.162891 | 1.046248 | 0.326272 | 0.442182 | UP   | 469.8624 | 469.8616 |
| 4744 | M348T17_ | 3.181435 | 1.669678 | 1.081974 | 0.326339 | 0.442196 | UP   | 348.0939 | 348.0939 |
| 4745 | M366T10_ | 6.641821 | 2.731579 | 1.107995 | 0.326472 | 0.442225 | UP   | 365.8272 | 365.8271 |
| 4746 | M402T13  | 15.88757 | -3.98983 | -1.11701 | 0.326474 | 0.442226 | DOWN | 402.1915 | 402.1915 |

|      |          |          |          |          |          |          |      |          |          |
|------|----------|----------|----------|----------|----------|----------|------|----------|----------|
| 4747 | M590T22_ | 2.071578 | 1.05073  | 1.050774 | 0.326522 | 0.442236 | UP   | 590.1548 | 590.1541 |
| 4748 | M385T38  | 1.517022 | 0.601242 | 1.06521  | 0.326798 | 0.442315 | UP   | 385.2374 | 385.2373 |
| 4749 | M512T35_ | 2.873496 | 1.522807 | 1.094254 | 0.326855 | 0.442331 | UP   | 512.4157 | 512.4146 |
| 4750 | M230T10_ | 6.47284  | 2.694399 | 1.105527 | 0.326988 | 0.442369 | UP   | 229.7756 | 229.7754 |
| 4751 | M217T10_ | 9.983193 | 3.319501 | 1.111866 | 0.32713  | 0.442409 | UP   | 216.7544 | 216.7542 |
| 4752 | M373T31_ | 263.7872 | 8.043231 | 1.115142 | 0.327263 | 0.442447 | UP   | 373.1167 | 373.1119 |
| 4753 | M584T34  | 3.530984 | 1.82007  | 1.099184 | 0.327581 | 0.442537 | UP   | 584.4452 | 584.4442 |
| 4754 | M340T24_ | 2.887396 | 1.529769 | 1.108002 | 0.327654 | 0.442558 | UP   | 340.1558 | 340.1554 |
| 4755 | M360T9_1 | 2.668789 | -1.41619 | -1.10623 | 0.327773 | 0.442592 | DOWN | 359.7638 | 359.7632 |
| 4756 | M1585T10 | 3.763445 | 1.912054 | 1.076575 | 0.327846 | 0.442612 | UP   | 1585.047 | 1585.043 |
| 4757 | M187T21  | 2.059478 | 1.042279 | 1.049362 | 0.327881 | 0.442623 | UP   | 186.5539 | 186.5538 |
| 4758 | M230T10_ | 5.441686 | 2.444054 | 1.097954 | 0.327899 | 0.442627 | UP   | 229.5787 | 229.5787 |
| 4759 | M358T9_2 | 8.456278 | 3.080023 | 1.108508 | 0.327985 | 0.442652 | UP   | 357.8141 | 357.8139 |
| 4760 | M192T2   | 2.612453 | -1.3854  | -1.04319 | 0.328183 | 0.442708 | DOWN | 192.0078 | 192.0076 |
| 4761 | M398T28  | 1.646028 | 0.718989 | 1.040444 | 0.328557 | 0.442813 | UP   | 398.2902 | 398.2896 |
| 4762 | M958T41  | 2.279483 | -1.18871 | -1.06816 | 0.328569 | 0.442817 | DOWN | 958.4854 | 958.4837 |
| 4763 | M552T15  | 1.674123 | 0.743406 | 1.042094 | 0.328677 | 0.442847 | UP   | 552.4011 | 552.3996 |
| 4764 | M544T32  | 3.986606 | -1.99516 | -1.10302 | 0.328685 | 0.44285  | DOWN | 544.3377 | 544.3365 |
| 4765 | M484T32  | 2.105453 | 1.074131 | 1.0777   | 0.328725 | 0.442861 | UP   | 484.0916 | 484.0913 |
| 4766 | M468T20_ | 1.863595 | -0.89809 | -1.07474 | 0.328744 | 0.442866 | DOWN | 468.2725 | 468.2722 |
| 4767 | M274T27  | 1.843749 | 0.882642 | 1.041249 | 0.328745 | 0.442867 | UP   | 273.628  | 273.6276 |
| 4768 | M499T23_ | 2.188016 | -1.12962 | -1.09629 | 0.328853 | 0.442897 | DOWN | 499.1637 | 499.1629 |
| 4769 | M325T25_ | 10.9275  | -3.44989 | -1.11082 | 0.328863 | 0.4429   | DOWN | 325.1987 | 325.1973 |
| 4770 | M517T39  | 2.429193 | 1.280477 | 1.089182 | 0.328877 | 0.442904 | UP   | 517.3718 | 517.3714 |
| 4771 | M884T32  | 3.514251 | -1.81322 | -1.09149 | 0.328959 | 0.442927 | DOWN | 884.3731 | 884.3721 |
| 4772 | M481T22  | 4.811167 | 2.266387 | 1.104965 | 0.328997 | 0.442938 | UP   | 481.0458 | 481.0454 |
| 4773 | M157T9   | 9.644255 | 3.26967  | 1.106213 | 0.32902  | 0.442944 | UP   | 156.703  | 156.703  |
| 4774 | M460T34_ | 1.32718  | -0.40836 | -1.085   | 0.329204 | 0.442996 | DOWN | 460.3085 | 460.3079 |
| 4775 | M791T21  | 2.046447 | 1.033121 | 1.054261 | 0.329215 | 0.442999 | UP   | 790.5239 | 790.5233 |
| 4776 | M557T35  | 2.997254 | 1.583641 | 1.090203 | 0.32923  | 0.443003 | UP   | 557.4454 | 557.4443 |
| 4777 | M1993T10 | 5.039001 | 2.333138 | 1.104019 | 0.329409 | 0.443053 | UP   | 1993.147 | 1993.141 |
| 4778 | M358T9_4 | 7.128768 | 2.833653 | 1.100768 | 0.329473 | 0.443071 | UP   | 357.9946 | 357.9944 |
| 4779 | M296T31_ | 1.655846 | 0.727569 | 1.039885 | 0.329478 | 0.443073 | UP   | 296.1858 | 296.1855 |
| 4780 | M1045T9_ | 10.86536 | 3.441665 | 1.105496 | 0.329582 | 0.443102 | UP   | 1044.82  | 1044.819 |
| 4781 | M632T44  | 2.073945 | -1.05238 | -1.09814 | 0.329601 | 0.443108 | DOWN | 632.4161 | 632.4157 |
| 4782 | M326T15_ | 1.614404 | 0.691002 | 1.038239 | 0.329747 | 0.443149 | UP   | 326.233  | 326.2323 |
| 4783 | M655T40  | 3.650224 | 1.867985 | 1.105064 | 0.329872 | 0.443184 | UP   | 655.4995 | 655.499  |
| 4784 | M805T41  | 1.651092 | 0.72342  | 1.038384 | 0.329897 | 0.443191 | UP   | 805.2183 | 805.2181 |
| 4785 | M429T38  | 2.138566 | 1.096644 | 1.055476 | 0.329897 | 0.443191 | UP   | 429.0655 | 429.0654 |
| 4786 | M602T34  | 3.470946 | 1.795329 | 1.092689 | 0.329968 | 0.443211 | UP   | 602.4746 | 602.473  |
| 4787 | M1655T10 | 5.38363  | 2.428579 | 1.093844 | 0.330007 | 0.443221 | UP   | 1654.771 | 1654.769 |
| 4788 | M599T19  | 3.063651 | 1.615252 | 1.074773 | 0.330413 | 0.443337 | UP   | 599.3135 | 599.3134 |
| 4789 | M391T17_ | 3.015845 | 1.592563 | 1.063683 | 0.330509 | 0.443364 | UP   | 390.9938 | 390.9936 |
| 4790 | M706T9_1 | 2.851792 | 1.511869 | 1.071339 | 0.330541 | 0.443373 | UP   | 705.667  | 705.6651 |
| 4791 | M375T9_3 | 3.840956 | 1.941466 | 1.075925 | 0.330549 | 0.443376 | UP   | 375.4861 | 375.486  |
| 4792 | M374T27  | 1.756972 | 0.813091 | 1.036122 | 0.330578 | 0.443384 | UP   | 374.1051 | 374.1049 |
| 4793 | M339T32_ | 1.720469 | 0.782802 | 1.086917 | 0.3309   | 0.443475 | UP   | 339.158  | 339.1572 |

|      |          |          |          |          |          |          |      |          |          |
|------|----------|----------|----------|----------|----------|----------|------|----------|----------|
| 4794 | M607T23_ | 1.677097 | 0.745966 | 1.035456 | 0.330991 | 0.443501 | UP   | 607.4665 | 607.4656 |
| 4795 | M578T37  | 1.558117 | 0.639803 | 1.034787 | 0.331043 | 0.443515 | UP   | 578.437  | 578.4363 |
| 4796 | M364T35  | 2.395778 | 1.260494 | 1.068211 | 0.331045 | 0.443516 | UP   | 364.3139 | 364.3132 |
| 4797 | M301T18_ | 1.795757 | 0.844592 | 1.041875 | 0.331158 | 0.443548 | UP   | 301.1295 | 301.1292 |
| 4798 | M468T35  | 2.801555 | 1.486228 | 1.08217  | 0.331242 | 0.443572 | UP   | 468.3894 | 468.3887 |
| 4799 | M453T21_ | 9.869876 | -3.30303 | -1.10436 | 0.331255 | 0.443576 | DOWN | 453.2601 | 453.2587 |
| 4800 | M629T30_ | 2.260929 | 1.176915 | 1.045557 | 0.33128  | 0.443583 | UP   | 629.1338 | 629.1333 |
| 4801 | M413T22_ | 1.871936 | 0.904531 | 1.034131 | 0.331326 | 0.443596 | UP   | 413.0463 | 413.046  |
| 4802 | M277T26  | 1.664765 | 0.735318 | 1.0341   | 0.331344 | 0.443601 | UP   | 277.18   | 277.1796 |
| 4803 | M705T9_2 | 2.817851 | 1.494596 | 1.066062 | 0.331407 | 0.443619 | UP   | 704.657  | 704.6551 |
| 4804 | M399T11_ | 15.58312 | -3.96191 | -1.10322 | 0.331749 | 0.443716 | DOWN | 399.1782 | 399.1781 |
| 4805 | M566T9_1 | 2.125118 | 1.087543 | 1.096397 | 0.331754 | 0.443717 | UP   | 566.2604 | 566.2603 |
| 4806 | M216T10_ | 4.978269 | 2.315644 | 1.088956 | 0.331866 | 0.443749 | UP   | 216.32   | 216.3199 |
| 4807 | M335T10_ | 2.324778 | 1.217093 | 1.038572 | 0.332022 | 0.443793 | UP   | 335.1722 | 335.1715 |
| 4808 | M630T30  | 1.788192 | 0.838501 | 1.04444  | 0.332043 | 0.443799 | UP   | 630.4577 | 630.4573 |
| 4809 | M543T11_ | 2.0654   | 1.046422 | 1.032861 | 0.332044 | 0.443799 | UP   | 543.1572 | 543.1566 |
| 4810 | M567T40  | 3.046509 | 1.607157 | 1.095631 | 0.332105 | 0.443816 | UP   | 567.447  | 567.4467 |
| 4811 | M315T44  | 1.473834 | -0.55957 | -1.04243 | 0.332139 | 0.443826 | DOWN | 315.1628 | 315.1627 |
| 4812 | M340T10_ | 2.43809  | 1.285752 | 1.071588 | 0.332221 | 0.443849 | UP   | 340.2599 | 340.252  |
| 4813 | M413T26_ | 2.149956 | 1.104307 | 1.045571 | 0.332385 | 0.443895 | UP   | 413.0331 | 413.033  |
| 4814 | M445T33  | 13.82832 | -3.78955 | -1.10116 | 0.332423 | 0.443906 | DOWN | 445.1825 | 445.1818 |
| 4815 | M670T43_ | 1.307805 | 0.387147 | 1.035744 | 0.332668 | 0.443975 | UP   | 670.4591 | 670.4567 |
| 4816 | M526T30  | 1.769152 | -0.82306 | -1.05546 | 0.332763 | 0.444002 | DOWN | 526.4771 | 526.4768 |
| 4817 | M660T41_ | 1.662731 | -0.73355 | -1.05007 | 0.332838 | 0.444023 | DOWN | 660.2909 | 660.2896 |
| 4818 | M699T10_ | 2.144587 | 1.1007   | 1.075666 | 0.332977 | 0.444062 | UP   | 699.4839 | 699.4792 |
| 4819 | M596T31_ | 1.686559 | 0.754083 | 1.040736 | 0.333135 | 0.444106 | UP   | 596.2648 | 596.2635 |
| 4820 | M653T23_ | 2.86785  | 1.519969 | 1.060679 | 0.33314  | 0.444108 | UP   | 652.9676 | 652.967  |
| 4821 | M352T22_ | 2.108614 | -1.07629 | -1.08617 | 0.333194 | 0.444123 | DOWN | 352.0611 | 352.0607 |
| 4822 | M452T17  | 2.315044 | 1.21104  | 1.030271 | 0.333306 | 0.444154 | UP   | 451.9357 | 451.9353 |
| 4823 | M526T10  | 2.929876 | 1.55084  | 1.062169 | 0.333552 | 0.444223 | UP   | 526.3804 | 526.3732 |
| 4824 | M369T9_2 | 3.876781 | 1.954859 | 1.072904 | 0.333687 | 0.444261 | UP   | 369.4231 | 369.4227 |
| 4825 | M358T35  | 5.74091  | -2.52128 | -1.09752 | 0.333692 | 0.444263 | DOWN | 358.368  | 358.3675 |
| 4826 | M707T18  | 2.218852 | 1.149814 | 1.030565 | 0.333748 | 0.444279 | UP   | 706.9487 | 706.9485 |
| 4827 | M708T9_2 | 2.747237 | 1.457982 | 1.061316 | 0.333767 | 0.444284 | UP   | 708.0389 | 708.0381 |
| 4828 | M596T30_ | 1.817072 | 0.861615 | 1.028298 | 0.333896 | 0.44432  | UP   | 596.2653 | 596.2644 |
| 4829 | M489T9_3 | 5.444594 | 2.444824 | 1.084263 | 0.3339   | 0.444321 | UP   | 488.9733 | 488.9731 |
| 4830 | M438T11_ | 1.434433 | 0.520481 | 1.038092 | 0.334092 | 0.444375 | UP   | 438.3331 | 438.3321 |
| 4831 | M347T41  | 1.684373 | 0.752212 | 1.040356 | 0.334097 | 0.444376 | UP   | 347.3156 | 347.3149 |
| 4832 | M291T9_2 | 4.013426 | 2.004834 | 1.086473 | 0.334117 | 0.444382 | UP   | 290.9474 | 290.9471 |
| 4833 | M514T26  | 24.40607 | 4.609168 | 1.097067 | 0.334127 | 0.444385 | UP   | 514.3953 | 514.3943 |
| 4834 | M239T27  | 1.714564 | -0.77784 | -1.06215 | 0.334278 | 0.444427 | DOWN | 239.1754 | 239.1751 |
| 4835 | M627T34  | 2.502895 | 1.323598 | 1.0622   | 0.334569 | 0.444508 | UP   | 627.4684 | 627.4668 |
| 4836 | M768T30  | 1.982718 | 0.987479 | 1.029627 | 0.334771 | 0.444564 | UP   | 768.2112 | 768.2105 |
| 4837 | M816T31  | 1.970081 | 0.978255 | 1.02925  | 0.335045 | 0.444641 | UP   | 816.1261 | 816.1259 |
| 4838 | M216T10_ | 4.409636 | 2.140659 | 1.072934 | 0.335167 | 0.444675 | UP   | 216.4821 | 216.4819 |
| 4839 | M1592T10 | 2.576134 | 1.365208 | 1.029612 | 0.33518  | 0.444678 | UP   | 1592.207 | 1592.201 |
| 4840 | M338T9   | 3.494226 | 1.804973 | 1.05833  | 0.335332 | 0.444721 | UP   | 338.2621 | 338.262  |

|      |          |          |          |          |          |          |      |          |          |
|------|----------|----------|----------|----------|----------|----------|------|----------|----------|
| 4841 | M613T10_ | 1.75224  | 0.809201 | 1.025759 | 0.335365 | 0.44473  | UP   | 613.4179 | 613.4158 |
| 4842 | M1959T9  | 3.775082 | 1.916508 | 1.079597 | 0.335444 | 0.444752 | UP   | 1959.277 | 1959.274 |
| 4843 | M908T10  | 1.916083 | 0.93816  | 1.027557 | 0.335501 | 0.444768 | UP   | 907.6888 | 907.685  |
| 4844 | M381T35_ | 2.721958 | 1.444645 | 1.072284 | 0.335533 | 0.444776 | UP   | 381.3405 | 381.3401 |
| 4845 | M552T18_ | 1.848293 | 0.886193 | 1.025484 | 0.335572 | 0.444788 | UP   | 551.8406 | 551.84   |
| 4846 | M241T24  | 2.288552 | -1.19444 | -1.07549 | 0.33562  | 0.444801 | DOWN | 241.1799 | 241.1796 |
| 4847 | M700T40  | 3.958531 | 1.984965 | 1.088681 | 0.33564  | 0.444806 | UP   | 699.5265 | 699.5252 |
| 4848 | M390T9_2 | 2.594988 | 1.375728 | 1.048751 | 0.33583  | 0.444859 | UP   | 389.8125 | 389.8119 |
| 4849 | M421T14  | 2.180692 | 1.124786 | 1.031783 | 0.336089 | 0.444931 | UP   | 420.897  | 420.8968 |
| 4850 | M490T9_1 | 4.335924 | 2.11634  | 1.066715 | 0.33614  | 0.444945 | UP   | 489.5853 | 489.5851 |
| 4851 | M577T30  | 1.144397 | 0.194588 | 1.023137 | 0.336203 | 0.444962 | UP   | 577.4143 | 577.4132 |
| 4852 | M216T30  | 1.799345 | 0.847472 | 1.025496 | 0.33624  | 0.444973 | UP   | 216.0851 | 216.085  |
| 4853 | M513T35  | 3.034041 | 1.60124  | 1.07353  | 0.336274 | 0.444982 | UP   | 513.419  | 513.418  |
| 4854 | M430T9   | 1.904869 | 0.929692 | 1.026553 | 0.336483 | 0.44504  | UP   | 430.244  | 430.2432 |
| 4855 | M389T9_1 | 2.247421 | 1.16827  | 1.068484 | 0.336578 | 0.445066 | UP   | 389.2538 | 389.2507 |
| 4856 | M281T21  | 1.766122 | 0.820585 | 1.046343 | 0.3367   | 0.4451   | UP   | 281.1387 | 281.1384 |
| 4857 | M728T11_ | 2.228822 | 1.156282 | 1.02218  | 0.336808 | 0.44513  | UP   | 728.3641 | 728.362  |
| 4858 | M666T30  | 1.163158 | 0.218047 | 1.025169 | 0.336876 | 0.445149 | UP   | 666.4701 | 666.4687 |
| 4859 | M506T44_ | 1.088311 | 0.122091 | 1.061614 | 0.336895 | 0.445154 | UP   | 505.8766 | 505.8758 |
| 4860 | M583T34_ | 2.723243 | 1.445326 | 1.065656 | 0.336937 | 0.445166 | UP   | 583.4419 | 583.4409 |
| 4861 | M216T10_ | 4.928178 | 2.301054 | 1.072975 | 0.337078 | 0.445205 | UP   | 216.2746 | 216.2745 |
| 4862 | M441T32  | 2.03786  | 1.027055 | 1.067306 | 0.337194 | 0.445236 | UP   | 441.0644 | 441.064  |
| 4863 | M177T19_ | 1.916043 | 0.93813  | 1.025847 | 0.337278 | 0.445259 | UP   | 177.0088 | 177.0086 |
| 4864 | M452T9_3 | 2.095843 | -1.06753 | -1.06781 | 0.337381 | 0.445288 | DOWN | 452.3313 | 452.3304 |
| 4865 | M599T10_ | 2.500982 | 1.322495 | 1.059426 | 0.337442 | 0.445305 | UP   | 599.4184 | 599.4166 |
| 4866 | M518T31_ | 2.126772 | 1.088666 | 1.070825 | 0.337489 | 0.445318 | UP   | 518.404  | 518.4028 |
| 4867 | M529T28  | 2.379317 | -1.25055 | -1.07054 | 0.337492 | 0.445319 | DOWN | 529.2756 | 529.2745 |
| 4868 | M252T25  | 2.392324 | -1.25841 | -1.07609 | 0.337795 | 0.445402 | DOWN | 252.1313 | 252.1309 |
| 4869 | M582T43  | 1.383369 | 0.468186 | 1.084638 | 0.337901 | 0.445431 | UP   | 582.4728 | 582.4717 |
| 4870 | M227T23  | 2.843436 | 1.507635 | 1.066027 | 0.338135 | 0.445495 | UP   | 227.0479 | 227.0478 |
| 4871 | M562T30  | 1.84848  | 0.88634  | 1.0203   | 0.338332 | 0.445549 | UP   | 562.2594 | 562.2585 |
| 4872 | M221T26_ | 1.646256 | 0.719188 | 1.01839  | 0.33834  | 0.445552 | UP   | 221.1173 | 221.117  |
| 4873 | M728T11_ | 1.883134 | 0.913136 | 1.018244 | 0.338397 | 0.445567 | UP   | 728.4371 | 728.435  |
| 4874 | M659T36  | 1.637781 | 0.711742 | 1.018476 | 0.338403 | 0.445569 | UP   | 658.5108 | 658.51   |
| 4875 | M792T26_ | 1.683017 | 0.75105  | 1.030215 | 0.338455 | 0.445583 | UP   | 791.5935 | 791.5923 |
| 4876 | M424T35  | 2.62963  | 1.39486  | 1.060759 | 0.338493 | 0.445594 | UP   | 424.3633 | 424.3625 |
| 4877 | M524T28  | 4.136878 | -2.04854 | -1.0807  | 0.338551 | 0.44561  | DOWN | 524.2753 | 524.2746 |
| 4878 | M363T35  | 2.181709 | 1.125458 | 1.043874 | 0.33861  | 0.445626 | UP   | 363.3106 | 363.31   |
| 4879 | M661T41  | 1.719467 | -0.78196 | -1.03117 | 0.33862  | 0.445628 | DOWN | 661.2937 | 661.2924 |
| 4880 | M705T10  | 8.470421 | 3.082434 | 1.080507 | 0.338644 | 0.445635 | UP   | 705.4132 | 705.4129 |
| 4881 | M628T34  | 3.327206 | 1.734311 | 1.068718 | 0.33881  | 0.44568  | UP   | 628.4724 | 628.4716 |
| 4882 | M259T10  | 1.897318 | 0.923962 | 1.018439 | 0.338857 | 0.445693 | UP   | 259.2019 | 259.201  |
| 4883 | M655T31_ | 2.176807 | 1.122214 | 1.031063 | 0.338955 | 0.44572  | UP   | 655.2412 | 655.2408 |
| 4884 | M251T9   | 2.37572  | 1.248365 | 1.068087 | 0.339003 | 0.445733 | UP   | 251.1855 | 251.1848 |
| 4885 | M267T11  | 1.594684 | 0.67327  | 1.016858 | 0.339016 | 0.445737 | UP   | 267.1749 | 267.1744 |
| 4886 | M546T22_ | 1.644115 | 0.717311 | 1.015919 | 0.339432 | 0.44585  | UP   | 546.4633 | 546.4622 |
| 4887 | M621T44  | 1.202535 | 0.266078 | 1.025677 | 0.339526 | 0.445876 | UP   | 621.4266 | 621.4261 |



|      |          |          |          |          |          |          |      |          |          |
|------|----------|----------|----------|----------|----------|----------|------|----------|----------|
| 4888 | M514T11_ | 1.961123 | 0.97168  | 1.01731  | 0.339535 | 0.445878 | UP   | 514.3496 | 514.3483 |
| 4889 | M308T38  | 1.354532 | 0.437795 | 1.056249 | 0.33958  | 0.445891 | UP   | 308.1897 | 308.1891 |
| 4890 | M590T44  | 1.240346 | 0.310743 | 1.017697 | 0.339582 | 0.445891 | UP   | 590.3923 | 590.3922 |
| 4891 | M531T40_ | 2.360549 | -1.23912 | -1.06601 | 0.339694 | 0.445922 | DOWN | 531.2743 | 531.274  |
| 4892 | M212T10_ | 3.244302 | 1.697908 | 1.042372 | 0.339953 | 0.445992 | UP   | 212.4984 | 212.4981 |
| 4893 | M472T30_ | 2.265051 | 1.179544 | 1.019194 | 0.340003 | 0.446006 | UP   | 471.5333 | 471.5329 |
| 4894 | M333T9_3 | 2.814703 | 1.492982 | 1.042898 | 0.340099 | 0.446032 | UP   | 333.1248 | 333.1241 |
| 4895 | M488T11  | 1.507182 | -0.59185 | -1.01839 | 0.340269 | 0.446078 | DOWN | 488.1964 | 488.1951 |
| 4896 | M710T30  | 1.163739 | 0.218767 | 1.029561 | 0.34035  | 0.4461   | UP   | 710.4963 | 710.4949 |
| 4897 | M376T9_3 | 3.628382 | 1.859326 | 1.050751 | 0.340485 | 0.446137 | UP   | 375.8978 | 375.8977 |
| 4898 | M411T11  | 1.856845 | 0.892853 | 1.01699  | 0.340775 | 0.446216 | UP   | 410.6911 | 410.6901 |
| 4899 | M657T10  | 2.89341  | 1.532771 | 1.041628 | 0.340786 | 0.446219 | UP   | 656.6848 | 656.6835 |
| 4900 | M215T11  | 1.759186 | 0.814908 | 1.01568  | 0.340793 | 0.446221 | UP   | 214.5799 | 214.5795 |
| 4901 | M212T16  | 216.9088 | 7.760945 | 1.080254 | 0.340813 | 0.446226 | UP   | 212.1364 | 212.1362 |
| 4902 | M564T29_ | 4.919158 | -2.29841 | -1.07009 | 0.340972 | 0.446269 | DOWN | 563.8149 | 563.8142 |
| 4903 | M448T19_ | 5.251962 | -2.39286 | -1.07648 | 0.340973 | 0.446269 | DOWN | 448.0693 | 448.0688 |
| 4904 | M269T29  | 2.002739 | 1.001975 | 1.019927 | 0.341077 | 0.446298 | UP   | 268.6255 | 268.625  |
| 4905 | M420T25  | 1.579431 | -0.6594  | -1.04521 | 0.341134 | 0.446313 | DOWN | 420.2826 | 420.2823 |
| 4906 | M680T21  | 1.789411 | 0.839485 | 1.01798  | 0.341285 | 0.446354 | UP   | 680.4383 | 680.4362 |
| 4907 | M225T10_ | 2.799422 | 1.485129 | 1.035236 | 0.341368 | 0.446376 | UP   | 225.1806 | 225.1804 |
| 4908 | M343T19  | 2.215026 | 1.147323 | 1.031924 | 0.341773 | 0.446486 | UP   | 343.2406 | 343.2402 |
| 4909 | M539T35  | 2.641933 | 1.401594 | 1.051968 | 0.341781 | 0.446488 | UP   | 539.4155 | 539.4139 |
| 4910 | M606T23_ | 1.637396 | 0.711403 | 1.012194 | 0.341791 | 0.446491 | UP   | 606.4631 | 606.462  |
| 4911 | M435T29_ | 1.745238 | 0.803424 | 1.011682 | 0.341838 | 0.446503 | UP   | 435.2041 | 435.2039 |
| 4912 | M366T32  | 1.906455 | 0.930893 | 1.016669 | 0.342018 | 0.446552 | UP   | 366.3215 | 366.3207 |
| 4913 | M815T31  | 2.139687 | 1.097399 | 1.019501 | 0.342094 | 0.446572 | UP   | 815.1293 | 815.129  |
| 4914 | M783T10_ | 2.80392  | 1.487445 | 1.033456 | 0.342233 | 0.44661  | UP   | 783.3885 | 783.3881 |
| 4915 | M382T44  | 1.133122 | -0.1803  | -1.03741 | 0.342318 | 0.446633 | DOWN | 382.2261 | 382.2258 |
| 4916 | M469T35  | 3.005827 | 1.587762 | 1.058529 | 0.342363 | 0.446645 | UP   | 469.3928 | 469.3919 |
| 4917 | M332T9_6 | 2.677055 | 1.420647 | 1.033914 | 0.342383 | 0.44665  | UP   | 332.4384 | 332.4376 |
| 4918 | M407T23  | 2.538197 | -1.3438  | -1.04563 | 0.34243  | 0.446663 | DOWN | 407.3242 | 407.3236 |
| 4919 | M706T10_ | 7.542334 | 2.915011 | 1.06937  | 0.342579 | 0.446703 | UP   | 705.9132 | 705.9128 |
| 4920 | M618T33_ | 1.453159 | 0.539193 | 1.033156 | 0.342595 | 0.446707 | UP   | 618.4383 | 618.4375 |
| 4921 | M226T13_ | 3.189307 | 1.673243 | 1.074183 | 0.342627 | 0.446716 | UP   | 226.2167 | 226.2163 |
| 4922 | M563T30  | 1.96841  | 0.977031 | 1.020661 | 0.342653 | 0.446723 | UP   | 563.2627 | 563.2618 |
| 4923 | M636T9   | 3.761541 | 1.911324 | 1.044314 | 0.342666 | 0.446726 | UP   | 635.6416 | 635.6408 |
| 4924 | M230T10_ | 4.886077 | 2.288677 | 1.059069 | 0.34274  | 0.446746 | UP   | 229.5278 | 229.5278 |
| 4925 | M216T10_ | 4.21069  | 2.074056 | 1.05111  | 0.342821 | 0.446768 | UP   | 215.8691 | 215.869  |
| 4926 | M678T10_ | 5.096923 | 2.349626 | 1.068334 | 0.342973 | 0.446809 | UP   | 678.2526 | 678.244  |
| 4927 | M318T31_ | 2.061835 | -1.04393 | -1.05627 | 0.343172 | 0.446862 | DOWN | 318.1182 | 318.1179 |
| 4928 | M296T32  | 1.951682 | 0.964718 | 1.056578 | 0.3432   | 0.44687  | UP   | 296.131  | 296.1303 |
| 4929 | M236T23_ | 1.872703 | 0.905122 | 1.012715 | 0.343221 | 0.446875 | UP   | 236.0694 | 236.0693 |
| 4930 | M425T35  | 2.996167 | 1.583118 | 1.056669 | 0.343264 | 0.446887 | UP   | 425.3667 | 425.3661 |
| 4931 | M320T18_ | 3.458483 | 1.790139 | 1.071395 | 0.343347 | 0.446909 | UP   | 320.1761 | 320.176  |
| 4932 | M396T9   | 1.985143 | -0.98924 | -1.04869 | 0.34348  | 0.446945 | DOWN | 396.2189 | 396.218  |
| 4933 | M345T22  | 2.111863 | 1.078516 | 1.017474 | 0.343799 | 0.44703  | UP   | 344.9723 | 344.9598 |
| 4934 | M518T10  | 1.945909 | 0.960444 | 1.005957 | 0.343892 | 0.447055 | UP   | 518.1919 | 518.1798 |

|      |          |          |          |          |          |          |      |          |          |
|------|----------|----------|----------|----------|----------|----------|------|----------|----------|
| 4935 | M430T10_ | 2.420101 | 1.275067 | 1.020885 | 0.344154 | 0.447125 | UP   | 429.7263 | 429.726  |
| 4936 | M558T26_ | 15.03866 | 3.910604 | 1.071089 | 0.34424  | 0.447148 | UP   | 558.4215 | 558.4212 |
| 4937 | M700T9_3 | 3.083218 | 1.624437 | 1.039802 | 0.34426  | 0.447153 | UP   | 700.4456 | 700.4443 |
| 4938 | M677T10_ | 7.913879 | 2.984385 | 1.067171 | 0.3443   | 0.447164 | UP   | 677.0043 | 677.0038 |
| 4939 | M359T9_2 | 3.600118 | 1.848044 | 1.041736 | 0.344398 | 0.44719  | UP   | 358.84   | 358.8394 |
| 4940 | M443T32_ | 2.038942 | 1.027821 | 1.031088 | 0.344437 | 0.4472   | UP   | 443.0649 | 443.0647 |
| 4941 | M719T17  | 2.091674 | 1.064658 | 1.004932 | 0.34463  | 0.447252 | UP   | 719.4054 | 719.4045 |
| 4942 | M818T7   | 4.438768 | 2.150159 | 1.057972 | 0.34466  | 0.44726  | UP   | 817.6259 | 817.6236 |
| 4943 | M614T10_ | 1.75267  | 0.809555 | 1.004709 | 0.344751 | 0.447284 | UP   | 614.4213 | 614.419  |
| 4944 | M594T44  | 1.216408 | 0.282627 | 1.006755 | 0.344887 | 0.44732  | UP   | 593.9296 | 593.9287 |
| 4945 | M365T30  | 2.120674 | 1.084523 | 1.014897 | 0.345063 | 0.447367 | UP   | 364.6014 | 364.6011 |
| 4946 | M796T7   | 3.735695 | 1.901377 | 1.049247 | 0.345324 | 0.447436 | UP   | 795.6442 | 795.6423 |
| 4947 | M303T39_ | 61.921   | 5.952357 | 1.068674 | 0.345419 | 0.447462 | UP   | 303.2453 | 303.2453 |
| 4948 | M914T41  | 2.048631 | -1.03466 | -1.04643 | 0.345628 | 0.447517 | DOWN | 914.4592 | 914.4582 |
| 4949 | M314T30_ | 1.942233 | 0.957716 | 1.006012 | 0.345852 | 0.447576 | UP   | 313.6412 | 313.641  |
| 4950 | M306T13_ | 2.479908 | 1.310287 | 1.062323 | 0.345933 | 0.447598 | UP   | 306.2432 | 306.2425 |
| 4951 | M389T10_ | 1.913833 | 0.936465 | 1.007337 | 0.345948 | 0.447602 | UP   | 389.0239 | 389.0227 |
| 4952 | M239T13  | 5.342463 | 2.417505 | 1.063924 | 0.346035 | 0.447625 | UP   | 239.128  | 239.1276 |
| 4953 | M454T23  | 1.879708 | -0.91051 | -1.02252 | 0.346211 | 0.447671 | DOWN | 454.1708 | 454.1698 |
| 4954 | M228T22_ | 6.439139 | 2.686868 | 1.065228 | 0.346279 | 0.447689 | UP   | 228.2687 | 228.2683 |
| 4955 | M328T31  | 2.057925 | 1.041191 | 1.027517 | 0.346403 | 0.447722 | UP   | 327.5933 | 327.5931 |
| 4956 | M204T10_ | 3.102189 | 1.633287 | 1.053988 | 0.346447 | 0.447734 | UP   | 203.887  | 203.8866 |
| 4957 | M348T9_2 | 2.722891 | 1.445139 | 1.025405 | 0.346679 | 0.447795 | UP   | 347.9953 | 347.9946 |
| 4958 | M415T15  | 7.862496 | -2.97499 | -1.06355 | 0.346769 | 0.447819 | DOWN | 415.1808 | 415.1808 |
| 4959 | M730T19  | 2.907269 | 1.539664 | 1.023041 | 0.34681  | 0.44783  | UP   | 729.8373 | 729.8358 |
| 4960 | M359T9_3 | 3.329355 | 1.735243 | 1.028557 | 0.346823 | 0.447833 | UP   | 358.8576 | 358.857  |
| 4961 | M496T35  | 2.796666 | 1.483708 | 1.043141 | 0.346896 | 0.447852 | UP   | 496.3924 | 496.3917 |
| 4962 | M824T34  | 2.750763 | 1.459832 | 1.038336 | 0.347051 | 0.447893 | UP   | 823.6094 | 823.6084 |
| 4963 | M342T9_5 | 2.38705  | 1.255229 | 1.012544 | 0.347112 | 0.447909 | UP   | 342.2976 | 342.2971 |
| 4964 | M411T22_ | 2.317255 | -1.21242 | -1.0531  | 0.347132 | 0.447914 | DOWN | 411.2073 | 411.2062 |
| 4965 | M543T12_ | 2.128721 | 1.089987 | 1.020402 | 0.347204 | 0.447934 | UP   | 543.3884 | 543.3873 |
| 4966 | M549T22_ | 2.007583 | 1.00546  | 1.001344 | 0.347252 | 0.447946 | UP   | 549.1278 | 549.1273 |
| 4967 | M426T35_ | 3.330204 | 1.735611 | 1.049422 | 0.34726  | 0.447948 | UP   | 426.3696 | 426.3696 |
| 4968 | M335T15  | 1.60237  | 0.680208 | 0.99845  | 0.347305 | 0.44796  | UP   | 335.2221 | 335.2215 |
| 4969 | M629T40  | 3.693638 | 1.885042 | 1.060498 | 0.347426 | 0.447992 | UP   | 629.4713 | 629.4712 |
| 4970 | M458T18  | 1.933784 | 0.951427 | 0.998517 | 0.347539 | 0.448022 | UP   | 457.929  | 457.9283 |
| 4971 | M374T10_ | 2.480181 | 1.310446 | 1.019269 | 0.347566 | 0.448029 | UP   | 374.2256 | 374.2196 |
| 4972 | M461T16  | 10.07988 | -3.33341 | -1.0617  | 0.347735 | 0.448073 | DOWN | 461.1953 | 461.1946 |
| 4973 | M658T9_2 | 2.762456 | 1.465952 | 1.017948 | 0.347741 | 0.448075 | UP   | 657.6373 | 657.6358 |
| 4974 | M462T21_ | 2.514188 | 1.330092 | 1.030527 | 0.3478   | 0.44809  | UP   | 462.0387 | 462.0379 |
| 4975 | M461T22_ | 2.0607   | -1.04313 | -1.03152 | 0.347858 | 0.448105 | DOWN | 461.265  | 461.2628 |
| 4976 | M479T22_ | 1.754777 | 0.811287 | 1.00894  | 0.347948 | 0.448129 | UP   | 478.924  | 478.9235 |
| 4977 | M1871T9  | 2.476672 | 1.308403 | 1.016596 | 0.347997 | 0.448142 | UP   | 1871.111 | 1871.107 |
| 4978 | M727T34  | 3.693646 | 1.885046 | 1.048255 | 0.348026 | 0.448149 | UP   | 726.8273 | 726.8259 |
| 4979 | M575T30  | 8.425057 | -3.07469 | -1.06066 | 0.348194 | 0.448193 | DOWN | 575.3426 | 575.3405 |
| 4980 | M434T28  | 1.983311 | 0.987911 | 0.997104 | 0.348202 | 0.448196 | UP   | 433.5181 | 433.5178 |
| 4981 | M371T26_ | 2.112043 | 1.078639 | 1.000737 | 0.348273 | 0.448214 | UP   | 371.0084 | 371.0081 |

|      |          |          |          |          |          |          |      |          |          |
|------|----------|----------|----------|----------|----------|----------|------|----------|----------|
| 4982 | M439T13  | 1.585955 | 0.665352 | 0.999914 | 0.348329 | 0.448229 | UP   | 439.3168 | 439.3162 |
| 4983 | M449T14  | 2.264569 | 1.179236 | 0.996416 | 0.348399 | 0.448247 | UP   | 448.8919 | 448.8913 |
| 4984 | M350T9_8 | 5.60823  | 2.487546 | 1.054357 | 0.348405 | 0.448249 | UP   | 350.2549 | 350.2545 |
| 4985 | M553T32_ | 11.13962 | -3.47763 | -1.05988 | 0.348408 | 0.448249 | DOWN | 553.3121 | 553.3119 |
| 4986 | M245T22_ | 1.735055 | 0.794981 | 0.99621  | 0.348412 | 0.448251 | UP   | 245.0837 | 245.0833 |
| 4987 | M480T9_1 | 2.127664 | 1.08927  | 1.023979 | 0.348432 | 0.448256 | UP   | 479.8022 | 479.798  |
| 4988 | M432T12  | 1.800583 | 0.848464 | 0.997171 | 0.348487 | 0.44827  | UP   | 432.202  | 432.2013 |
| 4989 | M675T10_ | 1.73649  | 0.796174 | 0.995559 | 0.348721 | 0.448331 | UP   | 675.4816 | 675.4796 |
| 4990 | M518T31_ | 2.019365 | 1.013902 | 1.046191 | 0.348727 | 0.448333 | UP   | 517.9022 | 517.9012 |
| 4991 | M360T10_ | 3.484661 | 1.801018 | 1.029522 | 0.34883  | 0.44836  | UP   | 359.6098 | 359.6091 |
| 4992 | M290T11_ | 3.129378 | 1.645876 | 1.026121 | 0.348996 | 0.448403 | UP   | 290.0514 | 290.0511 |
| 4993 | M699T9_2 | 2.970948 | 1.570923 | 1.027029 | 0.349009 | 0.448407 | UP   | 699.3989 | 699.3975 |
| 4994 | M754T30_ | 2.209178 | -1.14351 | -1.00517 | 0.349134 | 0.448439 | DOWN | 754.2331 | 754.2327 |
| 4995 | M713T9   | 2.435899 | 1.284454 | 1.040712 | 0.349218 | 0.448461 | UP   | 712.5176 | 712.5055 |
| 4996 | M280T31_ | 1.48859  | 0.573946 | 0.995402 | 0.34922  | 0.448462 | UP   | 280.1625 | 280.1621 |
| 4997 | M367T9_2 | 5.780223 | 2.531125 | 1.052094 | 0.349311 | 0.448485 | UP   | 367.4242 | 367.4235 |
| 4998 | M468T22  | 2.375177 | -1.24804 | -1.03986 | 0.349391 | 0.448506 | DOWN | 468.0662 | 468.0656 |
| 4999 | M539T9   | 1.938242 | 0.954749 | 1.021567 | 0.349408 | 0.448511 | UP   | 539.4165 | 539.4154 |
| 5000 | M558T24  | 1.983208 | 0.987836 | 1.000258 | 0.349627 | 0.448568 | UP   | 558.0876 | 558.0873 |
| 5001 | M343T11_ | 2.187536 | 1.129307 | 0.996065 | 0.349703 | 0.448587 | UP   | 342.6823 | 342.6818 |
| 5002 | M157T10_ | 5.275433 | 2.399289 | 1.044356 | 0.349813 | 0.448616 | UP   | 156.925  | 156.925  |
| 5003 | M401T32  | 2.074244 | 1.052585 | 1.033055 | 0.349844 | 0.448624 | UP   | 401.0348 | 401.0346 |
| 5004 | M511T32  | 1.733324 | -0.79354 | -1.00526 | 0.349852 | 0.448626 | DOWN | 511.3585 | 511.3578 |
| 5005 | M819T7   | 5.171976 | 2.370716 | 1.047977 | 0.34987  | 0.448631 | UP   | 818.6291 | 818.6284 |
| 5006 | M641T22_ | 2.743041 | -1.45578 | -1.04886 | 0.349902 | 0.448639 | DOWN | 641.2693 | 641.2678 |
| 5007 | M1584T10 | 3.040182 | 1.604158 | 1.012594 | 0.349939 | 0.448649 | UP   | 1584.126 | 1584.123 |
| 5008 | M545T28_ | 4.766593 | -2.25296 | -1.05308 | 0.350045 | 0.448677 | DOWN | 545.3815 | 545.3807 |
| 5009 | M627T33  | 2.087398 | 1.061705 | 0.992592 | 0.350113 | 0.448694 | UP   | 627.2944 | 627.2933 |
| 5010 | M360T22_ | 1.93518  | 0.952468 | 0.993179 | 0.350147 | 0.448703 | UP   | 359.9919 | 359.9916 |
| 5011 | M479T9   | 2.504143 | 1.324317 | 1.011089 | 0.350181 | 0.448712 | UP   | 479.3058 | 479.3035 |
| 5012 | M481T10_ | 2.036168 | 1.025857 | 0.99926  | 0.3502   | 0.448717 | UP   | 481.375  | 481.3735 |
| 5013 | M217T21  | 1.586976 | 0.66628  | 0.995526 | 0.350314 | 0.448746 | UP   | 217.1801 | 217.1797 |
| 5014 | M563T21  | 2.077818 | 1.055069 | 0.997561 | 0.350343 | 0.448754 | UP   | 562.9604 | 562.9602 |
| 5015 | M249T11  | 2.764038 | 1.466777 | 1.009309 | 0.350417 | 0.448773 | UP   | 249.0247 | 249.0244 |
| 5016 | M430T30_ | 1.481849 | -0.5674  | -0.99364 | 0.350425 | 0.448775 | DOWN | 430.2926 | 430.2923 |
| 5017 | M628T43  | 1.120753 | -0.16447 | -1.03013 | 0.350456 | 0.448783 | DOWN | 628.4395 | 628.4383 |
| 5018 | M793T11_ | 2.577105 | 1.365751 | 0.998081 | 0.350619 | 0.448825 | UP   | 792.8996 | 792.897  |
| 5019 | M638T7   | 5.135088 | 2.360389 | 1.047177 | 0.350687 | 0.448843 | UP   | 637.5381 | 637.5372 |
| 5020 | M243T10_ | 1.794302 | 0.843423 | 0.991632 | 0.351016 | 0.448928 | UP   | 243.1784 | 243.1702 |
| 5021 | M389T32  | 1.329805 | -0.41122 | -1.03299 | 0.35103  | 0.448932 | DOWN | 389.1119 | 389.1114 |
| 5022 | M312T33  | 3.464348 | -1.79258 | -1.04258 | 0.35106  | 0.44894  | DOWN | 312.1651 | 312.1649 |
| 5023 | M567T30_ | 1.929293 | -0.94807 | -1.02247 | 0.351157 | 0.448965 | DOWN | 567.2067 | 567.2063 |
| 5024 | M340T9   | 26.22139 | -4.71267 | -1.05419 | 0.351185 | 0.448972 | DOWN | 340.2856 | 340.2828 |
| 5025 | M177T25  | 1.925934 | -0.94556 | -1.04118 | 0.351473 | 0.449046 | DOWN | 177.0547 | 177.0544 |
| 5026 | M305T32_ | 1.740324 | 0.799356 | 0.992504 | 0.351493 | 0.449052 | UP   | 305.2115 | 305.2114 |
| 5027 | M173T9_1 | 2.183072 | 1.12636  | 1.000054 | 0.351524 | 0.449059 | UP   | 172.5945 | 172.5942 |
| 5028 | M294T26  | 1.641935 | 0.715397 | 0.989294 | 0.351543 | 0.449064 | UP   | 294.2066 | 294.2062 |

|      |          |          |          |          |          |          |      |          |          |
|------|----------|----------|----------|----------|----------|----------|------|----------|----------|
| 5029 | M390T23  | 2.177209 | 1.12248  | 1.004465 | 0.35162  | 0.449084 | UP   | 390.1044 | 390.1043 |
| 5030 | M300T18_ | 1.997357 | 0.998092 | 0.992278 | 0.351848 | 0.449143 | UP   | 300.126  | 300.121  |
| 5031 | M694T10  | 1.939237 | 0.955489 | 0.992266 | 0.351874 | 0.44915  | UP   | 693.5283 | 693.5255 |
| 5032 | M693T9   | 3.472241 | 1.795867 | 1.046503 | 0.351913 | 0.44916  | UP   | 693.4931 | 693.4924 |
| 5033 | M337T10  | 1.793882 | 0.843085 | 0.989091 | 0.351935 | 0.449166 | UP   | 337.2126 | 337.2117 |
| 5034 | M290T29_ | 1.932631 | 0.950566 | 0.990766 | 0.352235 | 0.449243 | UP   | 290.1388 | 290.1387 |
| 5035 | M522T13  | 3.939314 | 1.977945 | 1.026649 | 0.352236 | 0.449243 | UP   | 522.0546 | 522.0544 |
| 5036 | M342T15  | 1.404562 | 0.49012  | 0.988125 | 0.352351 | 0.449273 | UP   | 342.1914 | 342.1909 |
| 5037 | M521T11  | 1.522883 | 0.606805 | 0.987741 | 0.352397 | 0.449284 | UP   | 521.1586 | 521.1572 |
| 5038 | M512T27  | 1.386866 | -0.47183 | -0.98791 | 0.352505 | 0.449312 | DOWN | 512.3353 | 512.3341 |
| 5039 | M568T10  | 1.789647 | 0.839675 | 0.989808 | 0.352547 | 0.449323 | UP   | 567.9334 | 567.9311 |
| 5040 | M456T10_ | 2.638004 | 1.399447 | 1.001098 | 0.352712 | 0.449365 | UP   | 456.1873 | 456.1871 |
| 5041 | M698T9_2 | 2.017739 | 1.012739 | 0.999835 | 0.352844 | 0.449399 | UP   | 698.4874 | 698.484  |
| 5042 | M737T41_ | 2.363718 | -1.24106 | -1.03592 | 0.352855 | 0.449402 | DOWN | 737.4136 | 737.4126 |
| 5043 | M330T32  | 1.732025 | -0.79246 | -0.99607 | 0.352902 | 0.449414 | DOWN | 330.2359 | 330.2356 |
| 5044 | M282T11  | 1.775303 | 0.828065 | 0.987724 | 0.35293  | 0.449421 | UP   | 282.1944 | 282.1941 |
| 5045 | M380T34  | 2.158139 | 1.109788 | 1.012915 | 0.353001 | 0.44944  | UP   | 380.277  | 380.2764 |
| 5046 | M754T31  | 1.812623 | -0.85808 | -0.99642 | 0.353112 | 0.449468 | DOWN | 754.1994 | 754.1987 |
| 5047 | M319T19_ | 1.494663 | 0.57982  | 0.985907 | 0.353204 | 0.449491 | UP   | 318.851  | 318.8509 |
| 5048 | M667T9   | 3.625454 | 1.858162 | 1.028093 | 0.353418 | 0.449546 | UP   | 667.338  | 667.3352 |
| 5049 | M359T9_7 | 3.031068 | 1.599826 | 1.027561 | 0.353467 | 0.449559 | UP   | 359.4214 | 359.421  |
| 5050 | M168T21  | 1.858821 | 0.894388 | 0.989912 | 0.35375  | 0.449631 | UP   | 168.0746 | 168.0737 |
| 5051 | M624T11_ | 1.933554 | 0.951255 | 0.984012 | 0.35393  | 0.449677 | UP   | 623.8023 | 623.8006 |
| 5052 | M454T27_ | 1.956623 | -0.96837 | -1.02851 | 0.354048 | 0.449707 | DOWN | 454.3378 | 454.3376 |
| 5053 | M331T10_ | 1.894856 | 0.922088 | 0.987841 | 0.354061 | 0.449711 | UP   | 331.2549 | 331.2543 |
| 5054 | M505T28  | 1.644888 | 0.71799  | 0.985353 | 0.354078 | 0.449715 | UP   | 504.8901 | 504.8891 |
| 5055 | M376T9_2 | 2.957734 | 1.564492 | 1.012906 | 0.354143 | 0.449732 | UP   | 375.8789 | 375.8787 |
| 5056 | M629T11  | 1.854351 | 0.890915 | 0.983839 | 0.354215 | 0.44975  | UP   | 629.4404 | 629.4389 |
| 5057 | M504T43_ | 1.137952 | 0.18644  | 0.984932 | 0.354463 | 0.449813 | UP   | 504.0227 | 504.0222 |
| 5058 | M642T38  | 1.616758 | 0.693103 | 0.982843 | 0.354521 | 0.449828 | UP   | 642.4791 | 642.4784 |
| 5059 | M211T25_ | 3.034901 | -1.60165 | -1.04169 | 0.354735 | 0.449882 | DOWN | 211.1693 | 211.1692 |
| 5060 | M196T22  | 1.971721 | 0.979456 | 0.983595 | 0.354778 | 0.449893 | UP   | 196.0927 | 196.0925 |
| 5061 | M555T39  | 1.423943 | 0.509891 | 0.984078 | 0.354779 | 0.449893 | UP   | 555.445  | 555.444  |
| 5062 | M694T9   | 3.031912 | 1.600228 | 1.04248  | 0.35488  | 0.449919 | UP   | 694.497  | 694.4967 |
| 5063 | M314T30_ | 1.41029  | 0.495992 | 0.983131 | 0.354894 | 0.449923 | UP   | 314.3055 | 314.305  |
| 5064 | M596T29_ | 1.611767 | 0.688643 | 0.982748 | 0.354916 | 0.449928 | UP   | 596.2644 | 596.263  |
| 5065 | M409T11_ | 1.667673 | 0.737837 | 0.982416 | 0.354939 | 0.449934 | UP   | 409.3063 | 409.306  |
| 5066 | M326T10  | 2.223067 | 1.152552 | 1.006493 | 0.355127 | 0.449982 | UP   | 326.2631 | 326.2618 |
| 5067 | M377T10_ | 3.394824 | 1.763337 | 1.013808 | 0.355211 | 0.450003 | UP   | 377.3299 | 377.3294 |
| 5068 | M357T9_3 | 3.630352 | 1.860109 | 1.034617 | 0.355479 | 0.450071 | UP   | 357.2152 | 357.2147 |
| 5069 | M633T10_ | 2.669748 | 1.416703 | 0.989954 | 0.3555   | 0.450077 | UP   | 632.7019 | 632.7012 |
| 5070 | M279T31_ | 1.46947  | 0.555296 | 0.981796 | 0.355528 | 0.450084 | UP   | 279.1591 | 279.1587 |
| 5071 | M490T12  | 2.057407 | 1.040827 | 1.003369 | 0.35558  | 0.450097 | UP   | 490.3254 | 490.3245 |
| 5072 | M236T21  | 2.356641 | -1.23673 | -1.03382 | 0.355651 | 0.450115 | DOWN | 236.1648 | 236.1645 |
| 5073 | M275T28_ | 1.783917 | 0.835049 | 0.981826 | 0.355666 | 0.450119 | UP   | 274.6256 | 274.6254 |
| 5074 | M414T15  | 6.956322 | -2.79832 | -1.04098 | 0.355695 | 0.450126 | DOWN | 414.1775 | 414.1764 |
| 5075 | M603T34  | 3.521791 | 1.816309 | 1.029865 | 0.355847 | 0.450164 | UP   | 603.4772 | 603.476  |

|      |          |          |          |          |          |          |      |          |          |
|------|----------|----------|----------|----------|----------|----------|------|----------|----------|
| 5076 | M452T35  | 2.610229 | 1.384176 | 1.017818 | 0.355976 | 0.450197 | UP   | 452.3663 | 452.3653 |
| 5077 | M459T12  | 1.763572 | 0.818501 | 1.009892 | 0.35598  | 0.450198 | UP   | 459.2013 | 459.2008 |
| 5078 | M377T10_ | 3.666444 | 1.874381 | 1.017652 | 0.35599  | 0.450201 | UP   | 376.9346 | 376.9344 |
| 5079 | M470T35  | 2.786601 | 1.478506 | 1.036091 | 0.356059 | 0.450218 | UP   | 470.3957 | 470.3949 |
| 5080 | M753T44  | 1.432553 | 0.518588 | 0.986123 | 0.356089 | 0.450226 | UP   | 753.3806 | 753.3797 |
| 5081 | M576T23_ | 2.665103 | 1.414191 | 1.009047 | 0.356362 | 0.450295 | UP   | 576.0581 | 576.0576 |
| 5082 | M659T9_2 | 2.641539 | 1.401379 | 0.996023 | 0.356427 | 0.450311 | UP   | 658.5918 | 658.5903 |
| 5083 | M680T9_1 | 1.682147 | 0.750304 | 0.984003 | 0.356684 | 0.450376 | UP   | 679.608  | 679.5967 |
| 5084 | M224T30  | 2.293026 | -1.19725 | -1.02257 | 0.35672  | 0.450385 | DOWN | 224.0998 | 224.0995 |
| 5085 | M340T18_ | 1.348134 | -0.43096 | -1.00933 | 0.356838 | 0.450415 | DOWN | 340.2488 | 340.2486 |
| 5086 | M359T22_ | 1.957474 | 0.968993 | 0.980439 | 0.356841 | 0.450415 | UP   | 358.9881 | 358.9874 |
| 5087 | M1983T9  | 4.196245 | 2.069099 | 1.029568 | 0.356858 | 0.45042  | UP   | 1983.124 | 1983.118 |
| 5088 | M319T35  | 1.722734 | 0.7847   | 0.978325 | 0.356926 | 0.450437 | UP   | 319.2844 | 319.2839 |
| 5089 | M395T21_ | 1.672798 | 0.742263 | 0.977446 | 0.357098 | 0.45048  | UP   | 395.3269 | 395.3266 |
| 5090 | M558T35  | 2.443624 | 1.289022 | 1.033091 | 0.357148 | 0.450493 | UP   | 558.4483 | 558.4475 |
| 5091 | M554T42_ | 1.161    | -0.21537 | -1.00898 | 0.357159 | 0.450496 | DOWN | 554.3938 | 554.3926 |
| 5092 | M594T31_ | 1.673334 | 0.742725 | 0.986303 | 0.357307 | 0.450533 | UP   | 594.2695 | 594.2687 |
| 5093 | M487T30_ | 2.473747 | -1.3067  | -0.9976  | 0.357382 | 0.450552 | DOWN | 487.3584 | 487.3582 |
| 5094 | M357T9_2 | 3.519059 | 1.81519  | 1.027428 | 0.357444 | 0.450567 | UP   | 357.1557 | 357.1551 |
| 5095 | M280T27_ | 1.881752 | -0.91208 | -1.01879 | 0.357558 | 0.450596 | DOWN | 280.1051 | 280.1048 |
| 5096 | M1589T10 | 3.176546 | 1.667459 | 0.998699 | 0.357712 | 0.450635 | UP   | 1588.62  | 1588.617 |
| 5097 | M1966T9  | 3.234724 | 1.693643 | 1.020342 | 0.357752 | 0.450645 | UP   | 1966.202 | 1966.198 |
| 5098 | M443T32_ | 1.981047 | 0.986263 | 1.01124  | 0.357974 | 0.4507   | UP   | 443.0312 | 443.0312 |
| 5099 | M400T33  | 1.407185 | -0.49281 | -0.97664 | 0.357981 | 0.450702 | DOWN | 400.3423 | 400.3417 |
| 5100 | M490T26_ | 2.196345 | -1.1351  | -0.9994  | 0.358051 | 0.45072  | DOWN | 490.2903 | 490.2898 |
| 5101 | M687T37_ | 1.623398 | 0.699017 | 0.975466 | 0.358101 | 0.450732 | UP   | 686.5053 | 686.5041 |
| 5102 | M350T44_ | 1.3041   | 0.383054 | 0.990913 | 0.358109 | 0.450734 | UP   | 350.2173 | 350.2167 |
| 5103 | M629T20  | 2.312853 | 1.209673 | 0.976415 | 0.358151 | 0.450745 | UP   | 629.0753 | 629.0746 |
| 5104 | M567T10_ | 1.805487 | 0.852388 | 0.975097 | 0.358152 | 0.450745 | UP   | 567.4311 | 567.4295 |
| 5105 | M457T10  | 2.437711 | 1.285527 | 0.995171 | 0.358155 | 0.450746 | UP   | 457.1844 | 457.1842 |
| 5106 | M278T19_ | 2.533772 | -1.34129 | -1.02602 | 0.358157 | 0.450746 | DOWN | 278.046  | 278.0457 |
| 5107 | M362T19_ | 1.785496 | 0.836325 | 0.995263 | 0.35818  | 0.450752 | UP   | 362.2695 | 362.2689 |
| 5108 | M607T25  | 2.025742 | 1.01845  | 0.985877 | 0.358193 | 0.450755 | UP   | 607.3595 | 607.3586 |
| 5109 | M333T11  | 1.763503 | 0.818444 | 0.974618 | 0.358296 | 0.450781 | UP   | 333.1942 | 333.1934 |
| 5110 | M700T9_1 | 2.249318 | 1.169488 | 1.011284 | 0.358526 | 0.450838 | UP   | 699.53   | 699.5283 |
| 5111 | M1042T31 | 3.893466 | -1.96106 | -1.02235 | 0.358672 | 0.450875 | DOWN | 1041.689 | 1041.688 |
| 5112 | M462T30  | 1.62032  | 0.696279 | 0.973067 | 0.359019 | 0.450962 | UP   | 462.3773 | 462.3766 |
| 5113 | M496T37  | 1.443482 | -0.52955 | -0.97708 | 0.359177 | 0.451001 | DOWN | 496.4835 | 496.4827 |
| 5114 | M275T9   | 3.512832 | 1.812635 | 1.025537 | 0.359206 | 0.451008 | UP   | 274.6367 | 274.6359 |
| 5115 | M659T41_ | 1.619492 | -0.69554 | -0.99144 | 0.359211 | 0.45101  | DOWN | 659.2876 | 659.2863 |
| 5116 | M540T12  | 1.858022 | 0.893768 | 0.974996 | 0.359239 | 0.451017 | UP   | 540.4075 | 540.407  |
| 5117 | M204T10_ | 3.108419 | 1.636181 | 1.019984 | 0.359553 | 0.451095 | UP   | 203.5582 | 203.5578 |
| 5118 | M282T14_ | 1.891536 | 0.919558 | 0.974109 | 0.359756 | 0.451145 | UP   | 282.2794 | 282.279  |
| 5119 | M379T9   | 3.555364 | 1.829997 | 1.014308 | 0.359757 | 0.451146 | UP   | 378.6561 | 378.6558 |
| 5120 | M603T24  | 2.125077 | 1.087515 | 0.984634 | 0.359887 | 0.451178 | UP   | 603.1458 | 603.1457 |
| 5121 | M392T17  | 3.058892 | 1.613009 | 0.995934 | 0.360001 | 0.451206 | UP   | 391.9973 | 391.9972 |
| 5122 | M461T18_ | 1.856906 | 0.892901 | 0.971213 | 0.360057 | 0.45122  | UP   | 460.9126 | 460.912  |

|      |          |          |          |          |          |          |      |          |          |
|------|----------|----------|----------|----------|----------|----------|------|----------|----------|
| 5123 | M420T10_ | 1.686053 | 0.75365  | 0.970949 | 0.360061 | 0.451221 | UP   | 420.2377 | 420.2373 |
| 5124 | M472T10  | 2.183282 | 1.126499 | 0.980624 | 0.360068 | 0.451223 | UP   | 471.6515 | 471.6507 |
| 5125 | M377T17  | 2.001645 | 1.001186 | 0.970875 | 0.36009  | 0.451228 | UP   | 376.9155 | 376.9146 |
| 5126 | M637T43_ | 1.137824 | 0.186277 | 0.975071 | 0.360094 | 0.451229 | UP   | 637.4546 | 637.4534 |
| 5127 | M621T17_ | 1.484702 | 0.570174 | 0.972061 | 0.3601   | 0.451231 | UP   | 621.4866 | 621.4855 |
| 5128 | M566T10  | 1.803469 | 0.850775 | 0.970557 | 0.360334 | 0.451289 | UP   | 566.4282 | 566.4265 |
| 5129 | M369T9_3 | 3.292276 | 1.719085 | 0.996609 | 0.360381 | 0.451301 | UP   | 369.4816 | 369.4809 |
| 5130 | M540T35_ | 2.812172 | 1.491685 | 1.012796 | 0.360385 | 0.451301 | UP   | 540.4184 | 540.4176 |
| 5131 | M373T37_ | 1.618141 | -0.69434 | -0.97234 | 0.360454 | 0.451319 | DOWN | 373.0985 | 373.0977 |
| 5132 | M554T11  | 2.178003 | 1.123006 | 0.982007 | 0.360747 | 0.451391 | UP   | 554.1648 | 554.1643 |
| 5133 | M564T22_ | 2.773431 | 1.471672 | 1.007475 | 0.360867 | 0.451421 | UP   | 564.1643 | 564.1634 |
| 5134 | M395T19_ | 3.58917  | 1.84365  | 1.014394 | 0.36095  | 0.451442 | UP   | 395.0791 | 395.079  |
| 5135 | M611T10_ | 4.73094  | 2.242127 | 1.014943 | 0.360959 | 0.451444 | UP   | 610.8422 | 610.8415 |
| 5136 | M630T11_ | 1.887683 | 0.916617 | 0.970251 | 0.361037 | 0.451463 | UP   | 630.4436 | 630.442  |
| 5137 | M229T10_ | 1.640038 | 0.71373  | 0.96892  | 0.361129 | 0.451486 | UP   | 229.1629 | 229.1626 |
| 5138 | M310T17_ | 1.531211 | 0.614673 | 0.970196 | 0.361299 | 0.451528 | UP   | 310.2435 | 310.2435 |
| 5139 | M478T9_4 | 3.908046 | 1.966448 | 1.005248 | 0.361364 | 0.451544 | UP   | 478.1789 | 478.1785 |
| 5140 | M1052T10 | 2.202439 | 1.139102 | 0.989997 | 0.361393 | 0.451551 | UP   | 1052.223 | 1052.222 |
| 5141 | M239T12  | 2.691452 | 1.428385 | 1.019927 | 0.361448 | 0.451565 | UP   | 239.128  | 239.1277 |
| 5142 | M379T10_ | 5.478563 | 2.453798 | 1.01862  | 0.361509 | 0.45158  | UP   | 379.0895 | 379.0893 |
| 5143 | M451T35  | 2.380926 | 1.251523 | 1.000315 | 0.361601 | 0.451602 | UP   | 451.363  | 451.3621 |
| 5144 | M245T26  | 1.906718 | 0.931092 | 0.976059 | 0.361651 | 0.451615 | UP   | 245.0837 | 245.0833 |
| 5145 | M600T24_ | 1.995811 | 0.996975 | 0.970749 | 0.361664 | 0.451618 | UP   | 600.1179 | 600.1175 |
| 5146 | M709T10_ | 4.780702 | 2.257223 | 1.022932 | 0.361737 | 0.451636 | UP   | 708.5411 | 708.5402 |
| 5147 | M387T23_ | 2.178804 | 1.123537 | 0.981964 | 0.361799 | 0.451651 | UP   | 387.1056 | 387.1055 |
| 5148 | M568T40  | 3.933044 | 1.975646 | 1.025763 | 0.362234 | 0.451758 | UP   | 568.4502 | 568.4494 |
| 5149 | M395T14  | 1.850428 | 0.887859 | 0.995785 | 0.362303 | 0.451775 | UP   | 395.2696 | 395.2687 |
| 5150 | M228T10_ | 1.862517 | 0.897254 | 0.976979 | 0.362317 | 0.451779 | UP   | 227.6772 | 227.6769 |
| 5151 | M481T9_3 | 2.6297   | 1.394898 | 0.986887 | 0.362355 | 0.451788 | UP   | 481.3038 | 481.3013 |
| 5152 | M227T10_ | 1.769113 | 0.823026 | 0.965833 | 0.362414 | 0.451803 | UP   | 227.1757 | 227.1749 |
| 5153 | M840T11  | 1.940772 | 0.956631 | 0.975919 | 0.362457 | 0.451813 | UP   | 840.3748 | 840.3712 |
| 5154 | M716T10_ | 3.442434 | 1.783429 | 1.005656 | 0.362608 | 0.45185  | UP   | 716.4369 | 716.4353 |
| 5155 | M429T16_ | 5.730556 | 2.518675 | 1.01827  | 0.362621 | 0.451853 | UP   | 429.0252 | 429.0247 |
| 5156 | M458T30_ | 1.513323 | -0.59772 | -0.97133 | 0.362772 | 0.45189  | DOWN | 458.2987 | 458.2985 |
| 5157 | M695T41  | 1.797932 | -0.84634 | -0.98375 | 0.362867 | 0.451914 | DOWN | 695.3592 | 695.3575 |
| 5158 | M488T42_ | 1.204049 | 0.267895 | 0.969822 | 0.363032 | 0.451954 | UP   | 488.1228 | 488.1218 |
| 5159 | M594T9_2 | 3.124701 | 1.643718 | 1.020583 | 0.363036 | 0.451955 | UP   | 594.2719 | 594.2703 |
| 5160 | M596T30_ | 1.54111  | -0.62397 | -0.98017 | 0.363094 | 0.451969 | DOWN | 596.3354 | 596.3344 |
| 5161 | M621T7   | 3.580461 | 1.840145 | 1.011752 | 0.363245 | 0.452006 | UP   | 621.3727 | 621.3722 |
| 5162 | M891T10  | 2.12833  | 1.089722 | 0.965472 | 0.363432 | 0.452052 | UP   | 891.4204 | 891.4196 |
| 5163 | M376T10_ | 3.316162 | 1.729514 | 0.995263 | 0.363452 | 0.452057 | UP   | 375.5925 | 375.5923 |
| 5164 | M675T41  | 1.794407 | -0.84351 | -0.98407 | 0.363652 | 0.452106 | DOWN | 675.2616 | 675.2602 |
| 5165 | M423T18_ | 2.402952 | 1.264808 | 0.987088 | 0.363676 | 0.452112 | UP   | 422.9865 | 422.986  |
| 5166 | M772T33  | 2.414879 | 1.271951 | 0.963789 | 0.363811 | 0.452145 | UP   | 772.2218 | 772.2214 |
| 5167 | M548T19  | 4.999186 | -2.32169 | -1.01981 | 0.363973 | 0.452184 | DOWN | 547.9944 | 547.9942 |
| 5168 | M225T20  | 1.917761 | 0.939423 | 0.964143 | 0.364004 | 0.452192 | UP   | 225.0324 | 225.0322 |
| 5169 | M718T29  | 1.89391  | 0.921368 | 0.96665  | 0.364016 | 0.452195 | UP   | 718.1953 | 718.1952 |

|      |          |          |          |          |          |          |      |          |          |
|------|----------|----------|----------|----------|----------|----------|------|----------|----------|
| 5170 | M566T9_2 | 2.09597  | 1.067618 | 1.015342 | 0.364283 | 0.45226  | UP   | 566.277  | 566.2754 |
| 5171 | M786T26  | 1.783753 | 0.834916 | 0.962592 | 0.364325 | 0.45227  | UP   | 786.0947 | 786.0945 |
| 5172 | M401T10_ | 1.556622 | 0.638418 | 0.985289 | 0.364371 | 0.452282 | UP   | 401.008  | 401.002  |
| 5173 | M760T34  | 2.049054 | 1.034958 | 0.978154 | 0.364434 | 0.452297 | UP   | 759.5475 | 759.5465 |
| 5174 | M453T9_2 | 4.532366 | 2.180265 | 1.007316 | 0.364527 | 0.45232  | UP   | 452.7995 | 452.7955 |
| 5175 | M999T34  | 2.918308 | 1.545132 | 0.995961 | 0.364598 | 0.452337 | UP   | 998.7122 | 998.7112 |
| 5176 | M335T39_ | 1211.849 | 10.24299 | 1.02185  | 0.364623 | 0.452343 | UP   | 335.2944 | 335.2888 |
| 5177 | M183T10  | 1.705601 | 0.77028  | 0.963981 | 0.364924 | 0.452416 | UP   | 183.1572 | 183.1569 |
| 5178 | M699T9_1 | 2.091447 | 1.064502 | 0.993481 | 0.36517  | 0.452476 | UP   | 698.5266 | 698.5244 |
| 5179 | M599T24_ | 1.919822 | 0.940972 | 0.969035 | 0.365193 | 0.452481 | UP   | 599.1145 | 599.114  |
| 5180 | M973T11  | 3.096249 | 1.630521 | 0.986539 | 0.3653   | 0.452507 | UP   | 973.4483 | 973.4449 |
| 5181 | M547T12  | 1.915835 | 0.937973 | 0.961532 | 0.365369 | 0.452524 | UP   | 547.3477 | 547.3477 |
| 5182 | M632T38  | 1.643542 | 0.716809 | 0.965672 | 0.365404 | 0.452533 | UP   | 631.9521 | 631.952  |
| 5183 | M434T45_ | 1.153202 | -0.20564 | -0.96212 | 0.365416 | 0.452536 | DOWN | 434.2745 | 434.2741 |
| 5184 | M622T30_ | 1.107528 | 0.147344 | 0.95975  | 0.365457 | 0.452545 | UP   | 622.4435 | 622.4426 |
| 5185 | M390T10  | 1.9572   | 0.968792 | 0.964803 | 0.36557  | 0.452573 | UP   | 389.7181 | 389.7176 |
| 5186 | M315T11_ | 1.806564 | 0.853249 | 0.960228 | 0.365604 | 0.452581 | UP   | 314.7224 | 314.7217 |
| 5187 | M659T43_ | 1.138658 | 0.187335 | 0.976863 | 0.365663 | 0.452596 | UP   | 658.9659 | 658.9645 |
| 5188 | M781T10  | 2.668128 | 1.415828 | 0.994402 | 0.365694 | 0.452603 | UP   | 781.4425 | 781.4401 |
| 5189 | M349T9_2 | 1.657168 | -0.72872 | -0.9642  | 0.365703 | 0.452605 | DOWN | 348.7727 | 348.7723 |
| 5190 | M358T9_7 | 2.983168 | 1.576845 | 0.981816 | 0.365726 | 0.452611 | UP   | 358.4736 | 358.4731 |
| 5191 | M697T9_2 | 1.720366 | 0.782716 | 0.963151 | 0.365726 | 0.452611 | UP   | 696.5388 | 696.5378 |
| 5192 | M341T10_ | 1.920394 | 0.941402 | 0.962667 | 0.36573  | 0.452612 | UP   | 340.7615 | 340.7604 |
| 5193 | M519T32_ | 1.996361 | 0.997373 | 0.960515 | 0.365882 | 0.452649 | UP   | 519.0612 | 519.0611 |
| 5194 | M557T28  | 2.000728 | 1.000525 | 0.96187  | 0.365887 | 0.45265  | UP   | 557.2158 | 557.2143 |
| 5195 | M341T10_ | 3.532035 | 1.8205   | 1.005311 | 0.366001 | 0.452677 | UP   | 340.6156 | 340.6146 |
| 5196 | M539T11  | 2.896617 | 1.534369 | 0.981101 | 0.366035 | 0.452686 | UP   | 539.1612 | 539.1601 |
| 5197 | M533T30_ | 1.626045 | -0.70137 | -0.96883 | 0.366088 | 0.452698 | DOWN | 533.3435 | 533.3427 |
| 5198 | M367T10_ | 3.93171  | 1.975157 | 1.000673 | 0.366123 | 0.452707 | UP   | 367.3232 | 367.3232 |
| 5199 | M495T35  | 2.44392  | 1.289197 | 0.991646 | 0.36613  | 0.452709 | UP   | 495.3891 | 495.3881 |
| 5200 | M435T16  | 2.021836 | 1.015666 | 0.958335 | 0.366201 | 0.452726 | UP   | 434.9127 | 434.9125 |
| 5201 | M476T22  | 1.780305 | 0.832125 | 0.981729 | 0.366282 | 0.452745 | UP   | 475.9153 | 475.9151 |
| 5202 | M575T29_ | 1.702784 | 0.767896 | 0.95899  | 0.366407 | 0.452775 | UP   | 575.2629 | 575.2615 |
| 5203 | M987T32  | 1.585845 | 0.665252 | 0.96642  | 0.36642  | 0.452778 | UP   | 986.6638 | 986.6628 |
| 5204 | M331T39  | 1.457103 | -0.5431  | -0.96817 | 0.366577 | 0.452817 | DOWN | 331.212  | 331.2118 |
| 5205 | M664T9   | 230.8116 | 7.850572 | 1.016987 | 0.366669 | 0.452839 | UP   | 664.4474 | 664.4473 |
| 5206 | M478T34  | 3.350392 | 1.74433  | 1.004724 | 0.366804 | 0.452871 | UP   | 477.8408 | 477.8403 |
| 5207 | M658T35_ | 2.753246 | 1.461134 | 1.014426 | 0.366853 | 0.452883 | UP   | 658.4741 | 658.4729 |
| 5208 | M369T13  | 2.018327 | 1.01316  | 1.002444 | 0.366889 | 0.452892 | UP   | 369.1634 | 369.1632 |
| 5209 | M375T9_2 | 2.450282 | 1.292948 | 0.975108 | 0.366945 | 0.452905 | UP   | 375.4673 | 375.4669 |
| 5210 | M541T32  | 6.793325 | -2.76412 | -1.01094 | 0.36734  | 0.453008 | DOWN | 541.3285 | 541.3281 |
| 5211 | M326T38  | 1.598708 | 0.676907 | 0.98012  | 0.367537 | 0.45306  | UP   | 326.1627 | 326.1623 |
| 5212 | M493T14  | 1.55955  | 0.64113  | 0.957237 | 0.367696 | 0.453101 | UP   | 493.3834 | 493.383  |
| 5213 | M620T17_ | 1.457397 | 0.543394 | 0.95518  | 0.367814 | 0.453131 | UP   | 620.4831 | 620.4819 |
| 5214 | M458T32  | 1.541631 | 0.624457 | 0.956925 | 0.367888 | 0.453151 | UP   | 458.0559 | 458.0493 |
| 5215 | M450T26  | 2.38015  | 1.251053 | 0.978362 | 0.368052 | 0.453193 | UP   | 450.1086 | 450.1081 |
| 5216 | M343T20  | 1.437743 | 0.523806 | 0.95734  | 0.368095 | 0.453204 | UP   | 343.2958 | 343.2951 |

|      |          |          |          |          |          |          |      |          |          |
|------|----------|----------|----------|----------|----------|----------|------|----------|----------|
| 5217 | M298T32_ | 1.46737  | -0.55323 | -0.98236 | 0.368107 | 0.453208 | DOWN | 298.0822 | 298.0817 |
| 5218 | M412T22_ | 1.947183 | 0.961388 | 0.958982 | 0.368133 | 0.453214 | UP   | 411.9993 | 411.9981 |
| 5219 | M698T7   | 4.478147 | 2.162902 | 1.000107 | 0.368431 | 0.453292 | UP   | 697.5424 | 697.5413 |
| 5220 | M372T13  | 1.406032 | 0.491629 | 0.962482 | 0.368609 | 0.453338 | UP   | 372.2384 | 372.2378 |
| 5221 | M343T16_ | 2.013738 | 1.009876 | 0.986438 | 0.36863  | 0.453343 | UP   | 343.1883 | 343.1875 |
| 5222 | M268T27_ | 2.141864 | -1.09887 | -0.9948  | 0.368644 | 0.453347 | DOWN | 268.1755 | 268.175  |
| 5223 | M499T34_ | 1.773472 | 0.826576 | 0.954697 | 0.368975 | 0.453432 | UP   | 498.8556 | 498.855  |
| 5224 | M328T14  | 1.699249 | 0.764897 | 0.952796 | 0.368982 | 0.453434 | UP   | 328.2849 | 328.2842 |
| 5225 | M282T15_ | 1.962831 | 0.972936 | 0.958322 | 0.369009 | 0.453441 | UP   | 282.079  | 282.0789 |
| 5226 | M406T13  | 1.898502 | 0.924862 | 0.952583 | 0.36901  | 0.453441 | UP   | 406.2955 | 406.2951 |
| 5227 | M562T25_ | 2.053854 | 1.038333 | 0.970018 | 0.369067 | 0.453456 | UP   | 562.3692 | 562.3682 |
| 5228 | M348T9_4 | 2.449573 | 1.29253  | 0.969606 | 0.36935  | 0.453529 | UP   | 348.3457 | 348.3449 |
| 5229 | M290T11_ | 3.806865 | 1.928603 | 0.998326 | 0.369404 | 0.453543 | UP   | 290.1061 | 290.1057 |
| 5230 | M256T19_ | 2.212107 | 1.145421 | 0.959773 | 0.369428 | 0.453549 | UP   | 256.1627 | 256.1622 |
| 5231 | M524T35_ | 1.742715 | -0.80134 | -0.95105 | 0.369434 | 0.453551 | DOWN | 524.3706 | 524.3702 |
| 5232 | M376T9_5 | 3.029829 | 1.599236 | 0.973667 | 0.369596 | 0.453593 | UP   | 376.2912 | 376.2911 |
| 5233 | M339T32_ | 2.058895 | 1.04187  | 0.983167 | 0.369775 | 0.453639 | UP   | 339.2321 | 339.2318 |
| 5234 | M342T22_ | 1.97447  | 0.981466 | 0.956261 | 0.369853 | 0.453659 | UP   | 342.1495 | 342.1488 |
| 5235 | M309T13  | 1.707508 | 0.771893 | 0.951865 | 0.369871 | 0.453663 | UP   | 309.2622 | 309.2619 |
| 5236 | M228T10_ | 1.440551 | 0.526621 | 0.951508 | 0.370012 | 0.4537   | UP   | 228.1593 | 228.1591 |
| 5237 | M491T9_5 | 2.267704 | 1.181233 | 0.982266 | 0.370033 | 0.453705 | UP   | 491.3181 | 491.3139 |
| 5238 | M411T40  | 2.129618 | 1.090595 | 1.007556 | 0.370056 | 0.453711 | UP   | 411.3191 | 411.319  |
| 5239 | M439T26  | 2.921833 | -1.54687 | -0.99182 | 0.370097 | 0.453722 | DOWN | 439.0261 | 439.0258 |
| 5240 | M407T35  | 2.202322 | 1.139026 | 0.975088 | 0.370224 | 0.453754 | UP   | 407.3368 | 407.3361 |
| 5241 | M668T26  | 1.741398 | 0.800246 | 0.953137 | 0.370228 | 0.453755 | UP   | 668.159  | 668.1575 |
| 5242 | M734T32  | 1.972491 | -0.98002 | -0.95465 | 0.370233 | 0.453757 | DOWN | 734.1953 | 734.1944 |
| 5243 | M359T9_6 | 2.883023 | 1.527582 | 0.980725 | 0.37025  | 0.453761 | UP   | 359.3419 | 359.3412 |
| 5244 | M320T35  | 1.717568 | 0.780367 | 0.950125 | 0.370258 | 0.453763 | UP   | 320.2878 | 320.2872 |
| 5245 | M454T26  | 2.098046 | 1.069047 | 0.950612 | 0.370335 | 0.453783 | UP   | 454.0597 | 454.0593 |
| 5246 | M499T24  | 4.572131 | -2.19287 | -1.00578 | 0.370556 | 0.453839 | DOWN | 499.1771 | 499.1771 |
| 5247 | M554T10  | 2.250566 | 1.170288 | 0.95961  | 0.370763 | 0.453893 | UP   | 554.4644 | 554.4632 |
| 5248 | M315T30_ | 1.376995 | 0.461523 | 0.950178 | 0.370794 | 0.453901 | UP   | 315.3089 | 315.3083 |
| 5249 | M218T22_ | 1.880351 | 0.911002 | 0.967525 | 0.370883 | 0.453923 | UP   | 218.0193 | 218.0192 |
| 5250 | M385T23_ | 1.99231  | 0.994442 | 0.988579 | 0.370929 | 0.453935 | UP   | 385.3788 | 385.3701 |
| 5251 | M232T22_ | 1.786532 | 0.837162 | 0.986102 | 0.371067 | 0.45397  | UP   | 232.0449 | 232.0392 |
| 5252 | M350T25  | 1.706075 | 0.770681 | 0.986334 | 0.371086 | 0.453975 | UP   | 350.2047 | 350.2045 |
| 5253 | M1131T9  | 4.226563 | 2.079485 | 0.989665 | 0.371128 | 0.453986 | UP   | 1131.423 | 1131.418 |
| 5254 | M452T9_4 | 2.302033 | -1.20291 | -0.99759 | 0.371132 | 0.453987 | DOWN | 452.4109 | 452.4104 |
| 5255 | M468T12_ | 10.86612 | -3.44176 | -1.00603 | 0.371157 | 0.453993 | DOWN | 468.2244 | 468.2241 |
| 5256 | M424T20  | 1.728198 | 0.789268 | 0.959398 | 0.371216 | 0.454009 | UP   | 423.7816 | 423.7809 |
| 5257 | M317T10  | 3.637962 | 1.86313  | 0.978241 | 0.371378 | 0.45405  | UP   | 316.6136 | 316.6134 |
| 5258 | M431T11_ | 25.22441 | -4.65675 | -1.00574 | 0.371404 | 0.454057 | DOWN | 431.1157 | 431.1152 |
| 5259 | M638T22  | 2.546995 | -1.3488  | -0.99215 | 0.37141  | 0.454058 | DOWN | 638.2818 | 638.2814 |
| 5260 | M485T10_ | 1.772605 | 0.825871 | 0.947857 | 0.371831 | 0.454183 | UP   | 485.2168 | 485.2152 |
| 5261 | M535T17  | 2.868837 | 1.520466 | 0.962856 | 0.371977 | 0.454227 | UP   | 535.0692 | 535.0688 |
| 5262 | M316T30_ | 1.809914 | -0.85592 | -0.97897 | 0.372183 | 0.454288 | DOWN | 316.2847 | 316.2843 |
| 5263 | M204T10_ | 2.9494   | 1.560422 | 0.98862  | 0.372231 | 0.454302 | UP   | 203.7225 | 203.7222 |



|      |          |          |          |          |          |          |      |          |          |
|------|----------|----------|----------|----------|----------|----------|------|----------|----------|
| 5264 | M439T23  | 1.911941 | 0.935038 | 0.945929 | 0.372392 | 0.45435  | UP   | 439.262  | 439.2616 |
| 5265 | M418T9_1 | 1.873478 | -0.90572 | -0.9453  | 0.372409 | 0.454355 | DOWN | 417.9204 | 417.9198 |
| 5266 | M381T10  | 1.937939 | 0.954523 | 0.94459  | 0.372519 | 0.454387 | UP   | 381.2907 | 381.2905 |
| 5267 | M402T10_ | 1.865776 | 0.899776 | 0.985278 | 0.37264  | 0.454423 | UP   | 402.0627 | 402.0599 |
| 5268 | M643T38  | 1.638498 | 0.712374 | 0.943953 | 0.372849 | 0.454485 | UP   | 643.4826 | 643.4821 |
| 5269 | M659T18_ | 2.059353 | 1.042191 | 0.944089 | 0.372853 | 0.454486 | UP   | 658.9479 | 658.9468 |
| 5270 | M583T43  | 1.41733  | 0.503176 | 0.997857 | 0.372912 | 0.454503 | UP   | 583.4762 | 583.4753 |
| 5271 | M378T42  | 1.731943 | 0.792392 | 0.943964 | 0.373019 | 0.454535 | UP   | 378.3216 | 378.3214 |
| 5272 | M366T9_1 | 2.905644 | 1.538858 | 0.961643 | 0.373262 | 0.454607 | UP   | 365.8494 | 365.8493 |
| 5273 | M327T23_ | 2.016122 | 1.011583 | 0.944834 | 0.373324 | 0.454625 | UP   | 327.3007 | 327.3001 |
| 5274 | M339T26  | 5.165782 | -2.36899 | -0.99893 | 0.373357 | 0.454635 | DOWN | 339.1929 | 339.1926 |
| 5275 | M542T11  | 2.872671 | 1.522393 | 0.963516 | 0.373367 | 0.454638 | UP   | 542.1601 | 542.1595 |
| 5276 | M291T28_ | 2.415645 | -1.27241 | -0.98502 | 0.373443 | 0.45466  | DOWN | 291.1806 | 291.1799 |
| 5277 | M339T10_ | 2.065706 | 1.046635 | 0.95638  | 0.373593 | 0.454705 | UP   | 338.9463 | 338.9431 |
| 5278 | M390T31_ | 1.263333 | 0.337235 | 0.947074 | 0.373666 | 0.454726 | UP   | 390.1728 | 390.1727 |
| 5279 | M703T36  | 1.555807 | 0.637664 | 0.94211  | 0.373713 | 0.45474  | UP   | 702.5369 | 702.5359 |
| 5280 | M706T33  | 1.855447 | 0.891767 | 0.952014 | 0.373817 | 0.45477  | UP   | 705.9895 | 705.9892 |
| 5281 | M729T9_3 | 4.073095 | 2.026125 | 0.97979  | 0.373857 | 0.454782 | UP   | 729.1998 | 729.1994 |
| 5282 | M307T26  | 1.970009 | 0.978202 | 0.955015 | 0.373864 | 0.454784 | UP   | 307.1311 | 307.1304 |
| 5283 | M354T21  | 3.19066  | 1.673855 | 0.987709 | 0.373905 | 0.454796 | UP   | 354.0764 | 354.0754 |
| 5284 | M341T10_ | 1.939918 | 0.955995 | 0.94642  | 0.373944 | 0.454808 | UP   | 341.2632 | 341.262  |
| 5285 | M332T22_ | 1.741666 | 0.800468 | 0.965585 | 0.374083 | 0.454849 | UP   | 332.165  | 332.1648 |
| 5286 | M554T9   | 2.748507 | 1.458648 | 0.974424 | 0.374285 | 0.454908 | UP   | 554.2718 | 554.2705 |
| 5287 | M306T35_ | 1.35423  | 0.437473 | 0.946641 | 0.374358 | 0.45493  | UP   | 306.264  | 306.2637 |
| 5288 | M333T9_1 | 2.333697 | 1.222617 | 0.955906 | 0.374402 | 0.454943 | UP   | 332.7971 | 332.7964 |
| 5289 | M212T10_ | 2.824014 | 1.497747 | 0.957582 | 0.374523 | 0.454978 | UP   | 212.2515 | 212.2512 |
| 5290 | M301T38_ | 3.267531 | 1.708201 | 0.997462 | 0.374583 | 0.454995 | UP   | 301.2374 | 301.237  |
| 5291 | M333T17_ | 2.347452 | 1.231095 | 0.942436 | 0.374824 | 0.455066 | UP   | 333.0999 | 333.0997 |
| 5292 | M457T24_ | 1.877255 | 0.908624 | 0.951236 | 0.374832 | 0.455069 | UP   | 457.2151 | 457.2146 |
| 5293 | M413T27  | 2.370398 | 1.245129 | 0.980596 | 0.374895 | 0.455087 | UP   | 413.2301 | 413.2293 |
| 5294 | M329T23  | 2.059713 | 1.042443 | 0.948699 | 0.374913 | 0.455092 | UP   | 329.3164 | 329.3162 |
| 5295 | M336T21_ | 1.697743 | 0.763618 | 0.945098 | 0.375069 | 0.455138 | UP   | 336.0533 | 336.0533 |
| 5296 | M792T45  | 1.130882 | 0.177448 | 0.939162 | 0.375199 | 0.455176 | UP   | 791.6189 | 791.6184 |
| 5297 | M277T10_ | 3.689659 | 1.883488 | 0.986516 | 0.375379 | 0.455229 | UP   | 276.9891 | 276.9887 |
| 5298 | M447T30_ | 1.76026  | -0.81579 | -0.98296 | 0.375455 | 0.455251 | DOWN | 447.3105 | 447.3102 |
| 5299 | M367T39  | 1.55834  | 0.64001  | 0.980072 | 0.375768 | 0.455343 | UP   | 367.2035 | 367.2035 |
| 5300 | M503T10  | 2.166518 | 1.115378 | 0.946392 | 0.375795 | 0.45535  | UP   | 503.1897 | 503.1882 |
| 5301 | M731T9_1 | 3.506559 | 1.810056 | 0.972027 | 0.37602  | 0.455416 | UP   | 730.7883 | 730.7878 |
| 5302 | M277T16  | 2.45884  | 1.297978 | 0.953015 | 0.376059 | 0.455427 | UP   | 277.056  | 277.0558 |
| 5303 | M360T10_ | 2.793534 | 1.482091 | 0.976037 | 0.376136 | 0.45545  | UP   | 360.1931 | 360.1926 |
| 5304 | M374T19_ | 1.702317 | 0.7675   | 0.940779 | 0.376166 | 0.455459 | UP   | 374.2752 | 374.2746 |
| 5305 | M286T9   | 2.653042 | -1.40765 | -0.97283 | 0.376302 | 0.455498 | DOWN | 285.7425 | 285.7424 |
| 5306 | M337T35_ | 1.752124 | 0.809105 | 0.939656 | 0.376319 | 0.455503 | UP   | 337.3143 | 337.3133 |
| 5307 | M602T28  | 2.09873  | 1.069516 | 0.950205 | 0.376343 | 0.45551  | UP   | 602.2184 | 602.2177 |
| 5308 | M359T23  | 2.486919 | 1.31436  | 0.965882 | 0.376408 | 0.455529 | UP   | 359.0904 | 359.09   |
| 5309 | M322T13  | 1.966663 | 0.975749 | 0.944104 | 0.376437 | 0.455538 | UP   | 322.0375 | 322.0374 |
| 5310 | M344T32  | 1.780453 | -0.83224 | -0.98826 | 0.376441 | 0.455539 | DOWN | 344.3162 | 344.3155 |

|      |          |          |          |          |          |          |      |          |          |
|------|----------|----------|----------|----------|----------|----------|------|----------|----------|
| 5311 | M310T26_ | 1.951593 | 0.964652 | 0.94777  | 0.376465 | 0.455546 | UP   | 310.1298 | 310.1293 |
| 5312 | M458T24_ | 1.909853 | 0.933462 | 0.943056 | 0.376518 | 0.455561 | UP   | 458.2185 | 458.2182 |
| 5313 | M807T10  | 1.940201 | 0.956206 | 0.939944 | 0.376587 | 0.455581 | UP   | 807.4694 | 807.4689 |
| 5314 | M320T24_ | 2.183127 | 1.126396 | 0.988949 | 0.376687 | 0.455561 | UP   | 320.2225 | 320.2219 |
| 5315 | M457T26  | 1.953383 | 0.965975 | 0.954494 | 0.376728 | 0.455622 | UP   | 457.057  | 457.0562 |
| 5316 | M395T19_ | 1.544789 | 0.62741  | 0.938335 | 0.376901 | 0.455673 | UP   | 395.1278 | 395.1269 |
| 5317 | M834T11  | 2.121935 | -1.08538 | -0.97406 | 0.377232 | 0.455769 | DOWN | 834.3513 | 834.3483 |
| 5318 | M721T23  | 1.873126 | 0.905448 | 0.945481 | 0.377235 | 0.45577  | UP   | 721.4481 | 721.4472 |
| 5319 | M1006T10 | 4.896622 | 2.291787 | 0.978821 | 0.377297 | 0.455788 | UP   | 1006.401 | 1006.399 |
| 5320 | M515T23_ | 1.633167 | -0.70767 | -0.94804 | 0.377629 | 0.455884 | DOWN | 515.3195 | 515.3189 |
| 5321 | M314T11  | 1.784069 | 0.835172 | 0.935368 | 0.377686 | 0.4559   | UP   | 314.2207 | 314.22   |
| 5322 | M756T30  | 1.175821 | -0.23367 | -0.93446 | 0.377833 | 0.455943 | DOWN | 755.5254 | 755.524  |
| 5323 | M902T41  | 1.942952 | -0.95825 | -0.94672 | 0.378011 | 0.455995 | DOWN | 902.459  | 902.458  |
| 5324 | M698T44  | 1.617773 | 0.694009 | 0.93425  | 0.378039 | 0.456003 | UP   | 698.3301 | 698.3298 |
| 5325 | M492T14  | 1.518942 | 0.603067 | 0.93602  | 0.378134 | 0.45603  | UP   | 492.3796 | 492.3787 |
| 5326 | M793T11_ | 1.670475 | 0.740258 | 0.934042 | 0.378171 | 0.456041 | UP   | 792.5971 | 792.5949 |
| 5327 | M790T10_ | 2.252792 | 1.171714 | 0.966882 | 0.378271 | 0.45607  | UP   | 790.4497 | 790.4481 |
| 5328 | M351T31_ | 1.414442 | 0.500233 | 0.936235 | 0.378555 | 0.456152 | UP   | 351.0891 | 351.0891 |
| 5329 | M620T17_ | 1.445882 | 0.53195  | 0.932532 | 0.378666 | 0.456184 | UP   | 620.4832 | 620.4821 |
| 5330 | M553T24_ | 1.60226  | 0.680108 | 0.932827 | 0.378704 | 0.456195 | UP   | 553.2095 | 553.2094 |
| 5331 | M270T33  | 1.146221 | -0.19689 | -0.93267 | 0.378738 | 0.456205 | DOWN | 270.3156 | 270.3151 |
| 5332 | M291T30  | 2.081894 | -1.0579  | -0.96859 | 0.379272 | 0.456359 | DOWN | 291.2294 | 291.2289 |
| 5333 | M279T31_ | 1.627995 | 0.703096 | 0.930659 | 0.379305 | 0.456368 | UP   | 278.8066 | 278.8064 |
| 5334 | M266T13_ | 2.597526 | -1.37714 | -0.97755 | 0.379318 | 0.456372 | DOWN | 266.1728 | 266.1724 |
| 5335 | M419T29  | 1.814306 | 0.859418 | 0.931702 | 0.379467 | 0.456415 | UP   | 419.1265 | 419.1264 |
| 5336 | M486T42  | 1.091351 | 0.126115 | 0.930617 | 0.379539 | 0.456436 | UP   | 486.1259 | 486.1247 |
| 5337 | M516T39  | 2.104673 | 1.073596 | 0.969062 | 0.379606 | 0.456455 | UP   | 516.3684 | 516.3676 |
| 5338 | M503T11_ | 1.872247 | 0.904771 | 0.935711 | 0.379757 | 0.456498 | UP   | 503.1658 | 503.1597 |
| 5339 | M477T11_ | 20.32413 | -4.34512 | -0.98622 | 0.379802 | 0.456511 | DOWN | 477.1211 | 477.1206 |
| 5340 | M272T25  | 2.374638 | -1.24771 | -0.9829  | 0.379808 | 0.456513 | DOWN | 272.1858 | 272.1855 |
| 5341 | M201T2   | 1.736694 | 0.796344 | 0.973442 | 0.379864 | 0.456529 | UP   | 201.0081 | 201.0078 |
| 5342 | M348T9_5 | 2.466989 | 1.302751 | 0.948741 | 0.379875 | 0.456532 | UP   | 348.3625 | 348.3618 |
| 5343 | M294T12  | 1.56773  | 0.648677 | 0.929361 | 0.379933 | 0.456549 | UP   | 294.2066 | 294.2062 |
| 5344 | M339T13_ | 5.571456 | 2.478054 | 0.9796   | 0.380169 | 0.456617 | UP   | 339.053  | 339.0525 |
| 5345 | M212T9_2 | 2.854393 | 1.513184 | 0.945949 | 0.380211 | 0.456629 | UP   | 212.4718 | 212.4713 |
| 5346 | M226T21  | 2.742112 | -1.45529 | -0.97668 | 0.380566 | 0.456731 | DOWN | 226.1804 | 226.1801 |
| 5347 | M220T10_ | 1.981837 | 0.986838 | 0.931411 | 0.380592 | 0.456738 | UP   | 220.178  | 220.1779 |
| 5348 | M574T30_ | 7.385839 | -2.88476 | -0.98398 | 0.380669 | 0.45676  | DOWN | 574.3296 | 574.3286 |
| 5349 | M430T26  | 1.39077  | -0.47588 | -0.94261 | 0.380923 | 0.456833 | DOWN | 430.0245 | 430.0175 |
| 5350 | M582T29_ | 2.180405 | 1.124596 | 0.944047 | 0.381087 | 0.45688  | UP   | 582.2279 | 582.2273 |
| 5351 | M520T27  | 1.733879 | 0.794003 | 0.928255 | 0.381184 | 0.456907 | UP   | 520.0354 | 520.0353 |
| 5352 | M587T11_ | 2.541229 | 1.345526 | 0.964087 | 0.381211 | 0.456915 | UP   | 587.3177 | 587.3172 |
| 5353 | M289T26_ | 1.51621  | -0.60047 | -0.95313 | 0.381218 | 0.456917 | DOWN | 289.2127 | 289.2121 |
| 5354 | M542T32_ | 6.357727 | -2.66851 | -0.98205 | 0.381272 | 0.456933 | DOWN | 541.83   | 541.8213 |
| 5355 | M694T34  | 3.486018 | 1.80158  | 0.972008 | 0.38157  | 0.457018 | UP   | 693.7946 | 693.7941 |
| 5356 | M390T22_ | 1.785477 | 0.83631  | 0.925524 | 0.381765 | 0.457073 | UP   | 390.1367 | 390.1365 |
| 5357 | M301T28  | 1.785751 | 0.836531 | 0.926781 | 0.381804 | 0.457084 | UP   | 301.1463 | 301.1459 |

|      |           |          |          |          |          |          |      |          |          |
|------|-----------|----------|----------|----------|----------|----------|------|----------|----------|
| 5358 | M173T17   | 1.453765 | -0.53979 | -0.92502 | 0.382116 | 0.457173 | DOWN | 173.0961 | 173.0959 |
| 5359 | M353T30_  | 1.730808 | -0.79145 | -0.97004 | 0.382164 | 0.457187 | DOWN | 353.2085 | 353.2082 |
| 5360 | M1142T11_ | 1.919466 | 0.940705 | 0.930599 | 0.382321 | 0.457231 | UP   | 1141.558 | 1141.554 |
| 5361 | M408T35   | 2.286855 | 1.193365 | 0.955181 | 0.382565 | 0.457301 | UP   | 408.3402 | 408.3396 |
| 5362 | M485T42   | 1.084373 | 0.116861 | 0.945837 | 0.382601 | 0.457311 | UP   | 485.1321 | 485.1309 |
| 5363 | M615T43_  | 1.130963 | 0.177552 | 0.933616 | 0.382644 | 0.457323 | UP   | 614.9396 | 614.9386 |
| 5364 | M1578T10  | 2.655737 | 1.409112 | 0.934184 | 0.382767 | 0.457358 | UP   | 1578.098 | 1578.094 |
| 5365 | M524T40   | 2.564532 | 1.358696 | 0.967584 | 0.382832 | 0.457377 | UP   | 524.424  | 524.4239 |
| 5366 | M561T25   | 1.974929 | 0.9818   | 0.936324 | 0.382847 | 0.457381 | UP   | 561.3661 | 561.3651 |
| 5367 | M373T33_  | 1.856912 | 0.892905 | 0.927308 | 0.382903 | 0.457397 | UP   | 373.1311 | 373.1309 |
| 5368 | M471T15   | 1.671746 | 0.741356 | 0.923169 | 0.382919 | 0.457401 | UP   | 471.3623 | 471.3615 |
| 5369 | M399T30_  | 2.136977 | 1.095571 | 0.927015 | 0.382956 | 0.457412 | UP   | 398.5685 | 398.5682 |
| 5370 | M234T15   | 1.704092 | 0.769003 | 0.923706 | 0.383067 | 0.457443 | UP   | 234.1143 | 234.1141 |
| 5371 | M868T34   | 3.192721 | 1.674786 | 0.966478 | 0.383091 | 0.45745  | UP   | 867.6362 | 867.635  |
| 5372 | M660T32_  | 1.952098 | 0.965026 | 0.955998 | 0.383092 | 0.457451 | UP   | 659.9216 | 659.9213 |
| 5373 | M1750T10  | 2.934522 | 1.553125 | 0.941712 | 0.383189 | 0.457478 | UP   | 1749.798 | 1749.797 |
| 5374 | M537T44   | 1.144049 | 0.194148 | 0.925366 | 0.383287 | 0.457506 | UP   | 536.9045 | 536.9036 |
| 5375 | M612T11_  | 2.359979 | 1.238774 | 0.928567 | 0.383345 | 0.457522 | UP   | 611.7932 | 611.793  |
| 5376 | M425T34   | 1.521318 | 0.605321 | 0.952968 | 0.383471 | 0.457558 | UP   | 424.8003 | 424.7998 |
| 5377 | M554T26   | 1.871786 | 0.904415 | 0.925283 | 0.383696 | 0.457622 | UP   | 554.1967 | 554.1957 |
| 5378 | M427T38   | 1.88883  | -0.91749 | -0.96397 | 0.38374  | 0.457634 | DOWN | 427.2453 | 427.2443 |
| 5379 | M379T39   | 1.162294 | -0.21698 | -0.93469 | 0.38377  | 0.457643 | DOWN | 379.238  | 379.2374 |
| 5380 | M218T21   | 1.634842 | 0.709151 | 0.937308 | 0.383777 | 0.457645 | UP   | 218.1835 | 218.1835 |
| 5381 | M345T32_  | 2.584089 | -1.36966 | -0.97522 | 0.383962 | 0.457697 | DOWN | 345.3189 | 345.3188 |
| 5382 | M317T21_  | 1.816881 | 0.861464 | 0.920698 | 0.384167 | 0.457755 | UP   | 317.1051 | 317.1042 |
| 5383 | M240T13   | 6.52393  | 2.705741 | 0.974668 | 0.384331 | 0.457801 | UP   | 240.1313 | 240.1309 |
| 5384 | M405T9    | 1.914966 | -0.93732 | -0.92094 | 0.384421 | 0.457827 | DOWN | 405.2729 | 405.2728 |
| 5385 | M702T18   | 2.044336 | 1.031633 | 0.922161 | 0.384526 | 0.457856 | UP   | 701.9699 | 701.9698 |
| 5386 | M1978T10  | 2.865709 | 1.518892 | 0.951021 | 0.384729 | 0.457913 | UP   | 1978.141 | 1978.136 |
| 5387 | M394T10_  | 2.263516 | 1.178566 | 0.925452 | 0.384761 | 0.457922 | UP   | 394.1793 | 394.179  |
| 5388 | M1582T10  | 3.175654 | 1.667054 | 0.940578 | 0.384776 | 0.457927 | UP   | 1581.648 | 1581.645 |
| 5389 | M567T9    | 3.585381 | 1.842126 | 0.959283 | 0.384796 | 0.457932 | UP   | 567.2851 | 567.285  |
| 5390 | M587T38   | 1.412679 | -0.49843 | -0.96082 | 0.384807 | 0.457935 | DOWN | 586.5043 | 586.5032 |
| 5391 | M621T17_  | 1.450745 | 0.536794 | 0.920079 | 0.384845 | 0.457946 | UP   | 621.4865 | 621.4853 |
| 5392 | M607T11   | 2.010904 | 1.007844 | 0.931445 | 0.384853 | 0.457948 | UP   | 607.4804 | 607.4797 |
| 5393 | M573T33_  | 1.633091 | 0.707606 | 0.927131 | 0.384957 | 0.457978 | UP   | 573.4002 | 573.4    |
| 5394 | M306T10   | 1.922335 | 0.94286  | 0.947784 | 0.384991 | 0.457987 | UP   | 306.2432 | 306.2423 |
| 5395 | M411T10_  | 1.888603 | 0.917319 | 0.923353 | 0.384994 | 0.457988 | UP   | 411.3414 | 411.3401 |
| 5396 | M154T25_  | 3.633227 | 1.861251 | 0.950061 | 0.385036 | 0.458    | UP   | 153.5325 | 153.5324 |
| 5397 | M295T34_  | 3.594937 | -1.84597 | -0.97071 | 0.385241 | 0.458058 | DOWN | 295.1819 | 295.1783 |
| 5398 | M924T9    | 2.805909 | 1.488468 | 0.940049 | 0.385294 | 0.458072 | UP   | 923.6941 | 923.6924 |
| 5399 | M570T28_  | 1.582599 | -0.6623  | -0.93555 | 0.385351 | 0.458088 | DOWN | 570.3194 | 570.3193 |
| 5400 | M595T10_  | 2.525349 | 1.336483 | 0.923618 | 0.385352 | 0.458089 | UP   | 595.0069 | 595.0063 |
| 5401 | M649T32   | 2.80201  | 1.486462 | 0.934144 | 0.385501 | 0.458131 | UP   | 649.2409 | 649.2405 |
| 5402 | M635T12   | 1.734141 | 0.794221 | 0.91778  | 0.385571 | 0.45815  | UP   | 635.4749 | 635.4736 |
| 5403 | M981T34   | 1.746734 | 0.80466  | 0.918792 | 0.385591 | 0.458156 | UP   | 980.6738 | 980.673  |
| 5404 | M481T9_1  | 2.32672  | 1.218298 | 0.929616 | 0.385654 | 0.458174 | UP   | 480.804  | 480.803  |

|      |          |          |          |          |          |          |      |          |          |
|------|----------|----------|----------|----------|----------|----------|------|----------|----------|
| 5405 | M347T21_ | 3.611858 | 1.852741 | 0.962483 | 0.385799 | 0.458214 | UP   | 347.2481 | 347.241  |
| 5406 | M464T34_ | 1.618434 | 0.694598 | 0.953659 | 0.385839 | 0.458226 | UP   | 464.346  | 464.3452 |
| 5407 | M350T32_ | 1.785647 | 0.836447 | 0.922369 | 0.385902 | 0.458243 | UP   | 350.2984 | 350.2982 |
| 5408 | M690T9_2 | 2.345065 | 1.229628 | 0.935061 | 0.385909 | 0.458245 | UP   | 690.4989 | 690.497  |
| 5409 | M298T11  | 1.813624 | 0.858875 | 0.918651 | 0.386207 | 0.458329 | UP   | 298.2075 | 298.2069 |
| 5410 | M343T11_ | 2.075171 | 1.05323  | 0.920561 | 0.386291 | 0.458352 | UP   | 343.1783 | 343.1781 |
| 5411 | M217T17  | 1.36113  | -0.44481 | -0.94786 | 0.386305 | 0.458356 | DOWN | 217.1435 | 217.1433 |
| 5412 | M262T9   | 1.744537 | 0.802844 | 0.918545 | 0.386607 | 0.458441 | UP   | 262.1325 | 262.1319 |
| 5413 | M323T13  | 2.129358 | 1.090418 | 0.91659  | 0.386629 | 0.458447 | UP   | 322.8997 | 322.8996 |
| 5414 | M402T33  | 1.144805 | -0.1951  | -0.93039 | 0.386687 | 0.458463 | DOWN | 402.3579 | 402.3571 |
| 5415 | M893T31  | 1.561464 | 0.642899 | 0.916348 | 0.386689 | 0.458464 | UP   | 892.5435 | 892.542  |
| 5416 | M387T37  | 1.474154 | 0.559887 | 0.932679 | 0.386761 | 0.458484 | UP   | 387.1617 | 387.1616 |
| 5417 | M347T9   | 2.359559 | 1.238518 | 0.933443 | 0.386819 | 0.4585   | UP   | 347.2624 | 347.2617 |
| 5418 | M384T10_ | 1.797848 | 0.846271 | 0.915407 | 0.386828 | 0.458502 | UP   | 384.2577 | 384.2568 |
| 5419 | M406T14  | 1.479945 | 0.565544 | 0.916502 | 0.38704  | 0.458562 | UP   | 406.2307 | 406.2299 |
| 5420 | M402T23  | 2.802817 | -1.48688 | -0.95396 | 0.387046 | 0.458563 | DOWN | 402.0667 | 402.0658 |
| 5421 | M747T34  | 1.14814  | -0.1993  | -0.9157  | 0.387188 | 0.458603 | DOWN | 746.5272 | 746.5257 |
| 5422 | M295T11  | 1.572119 | 0.652711 | 0.914973 | 0.387207 | 0.458608 | UP   | 295.2383 | 295.2376 |
| 5423 | M473T17  | 1.94003  | 0.956079 | 0.915356 | 0.387399 | 0.458662 | UP   | 473.21   | 473.2093 |
| 5424 | M311T17_ | 1.530575 | 0.614074 | 0.915037 | 0.387485 | 0.458686 | UP   | 310.7453 | 310.7451 |
| 5425 | M837T29  | 1.802256 | 0.849804 | 0.916137 | 0.387524 | 0.458697 | UP   | 836.5954 | 836.5944 |
| 5426 | M371T32_ | 3.550802 | -1.82815 | -0.9662  | 0.387594 | 0.458716 | DOWN | 371.1357 | 371.1356 |
| 5427 | M544T12  | 1.988042 | 0.991349 | 0.930491 | 0.387795 | 0.458772 | UP   | 544.3919 | 544.3906 |
| 5428 | M549T28  | 1.720109 | 0.7825   | 0.913933 | 0.38785  | 0.458788 | UP   | 549.2474 | 549.2469 |
| 5429 | M204T10_ | 2.852314 | 1.512133 | 0.953321 | 0.387996 | 0.458828 | UP   | 203.9547 | 203.9543 |
| 5430 | M373T14_ | 2.059938 | 1.042601 | 0.914154 | 0.388079 | 0.458851 | UP   | 372.9868 | 372.9865 |
| 5431 | M676T22  | 1.541337 | 0.624183 | 0.926655 | 0.388088 | 0.458854 | UP   | 675.5097 | 675.5093 |
| 5432 | M226T25_ | 2.96784  | -1.56941 | -0.96526 | 0.388215 | 0.458889 | DOWN | 226.1802 | 226.1801 |
| 5433 | M241T27_ | 3.313517 | -1.72836 | -0.96333 | 0.388301 | 0.458913 | DOWN | 241.0497 | 241.0494 |
| 5434 | M462T18  | 1.565441 | 0.64657  | 0.937008 | 0.388337 | 0.458923 | UP   | 461.8997 | 461.8995 |
| 5435 | M373T19_ | 1.612814 | 0.68958  | 0.9163   | 0.388623 | 0.459002 | UP   | 373.2719 | 373.2711 |
| 5436 | M1749T9_ | 3.286317 | 1.716472 | 0.936672 | 0.388682 | 0.459019 | UP   | 1748.538 | 1748.537 |
| 5437 | M564T35_ | 1.715122 | -0.77831 | -0.93495 | 0.388689 | 0.459021 | DOWN | 564.2957 | 564.2952 |
| 5438 | M365T22_ | 1.742249 | 0.800951 | 0.91156  | 0.388739 | 0.459035 | UP   | 365.2902 | 365.2898 |
| 5439 | M533T23_ | 2.509135 | 1.32719  | 0.93109  | 0.388773 | 0.459044 | UP   | 533.0361 | 533.0356 |
| 5440 | M317T13  | 1.704961 | 0.769739 | 0.911139 | 0.388854 | 0.459066 | UP   | 317.244  | 317.2438 |
| 5441 | M293T34_ | 1.487485 | 0.572875 | 0.927916 | 0.388939 | 0.45909  | UP   | 293.2477 | 293.2475 |
| 5442 | M681T11  | 2.373676 | 1.247123 | 0.915998 | 0.388993 | 0.459105 | UP   | 681.3544 | 681.3538 |
| 5443 | M348T10_ | 1.930989 | 0.94934  | 0.922003 | 0.389348 | 0.459203 | UP   | 347.6116 | 347.611  |
| 5444 | M509T22_ | 1.914681 | 0.937104 | 0.913042 | 0.389374 | 0.45921  | UP   | 508.9132 | 508.9127 |
| 5445 | M619T17_ | 1.42034  | 0.506236 | 0.910875 | 0.389553 | 0.45926  | UP   | 619.4799 | 619.4787 |
| 5446 | M358T9_1 | 3.936348 | 1.976858 | 0.947377 | 0.389633 | 0.459282 | UP   | 357.5374 | 357.5372 |
| 5447 | M247T24_ | 1.573155 | 0.653661 | 0.909647 | 0.389657 | 0.459289 | UP   | 247.0959 | 247.0956 |
| 5448 | M624T30  | 1.733319 | 0.793537 | 0.912243 | 0.389692 | 0.459298 | UP   | 624.2751 | 624.2741 |
| 5449 | M373T28  | 1.792771 | -0.84219 | -0.93424 | 0.389721 | 0.459306 | DOWN | 373.3143 | 373.3136 |
| 5450 | M392T39  | 1.477474 | 0.563133 | 0.909248 | 0.389953 | 0.459371 | UP   | 392.337  | 392.3366 |
| 5451 | M342T11_ | 2.112444 | 1.078913 | 0.91025  | 0.390185 | 0.459435 | UP   | 342.1803 | 342.1798 |

|      |          |          |          |          |          |          |      |          |          |
|------|----------|----------|----------|----------|----------|----------|------|----------|----------|
| 5452 | M443T36  | 1.579999 | -0.65992 | -0.90867 | 0.39019  | 0.459436 | DOWN | 443.239  | 443.2386 |
| 5453 | M244T24  | 1.973811 | -0.98098 | -0.9172  | 0.390201 | 0.459439 | DOWN | 244.2273 | 244.2267 |
| 5454 | M792T11_ | 2.406887 | 1.267169 | 0.91298  | 0.390316 | 0.459471 | UP   | 791.897  | 791.8962 |
| 5455 | M728T9_1 | 3.261536 | 1.705552 | 0.932902 | 0.390404 | 0.459495 | UP   | 727.5644 | 727.5635 |
| 5456 | M841T30  | 1.119749 | 0.163175 | 0.921397 | 0.390524 | 0.459528 | UP   | 840.5689 | 840.5677 |
| 5457 | M426T44  | 2.889874 | -1.53101 | -0.95454 | 0.390529 | 0.459529 | DOWN | 426.3127 | 426.312  |
| 5458 | M675T10_ | 3.998762 | 1.999553 | 0.94315  | 0.390617 | 0.459554 | UP   | 675.3402 | 675.3397 |
| 5459 | M413T14_ | 2.312498 | 1.209452 | 0.91115  | 0.390644 | 0.459561 | UP   | 413.0097 | 413.0094 |
| 5460 | M230T12_ | 1.342936 | 0.42539  | 0.908566 | 0.39083  | 0.459612 | UP   | 230.1752 | 230.1751 |
| 5461 | M466T12  | 1.552976 | 0.635036 | 0.912641 | 0.391223 | 0.45972  | UP   | 466.2283 | 466.2275 |
| 5462 | M366T29_ | 2.531066 | -1.33974 | -0.95152 | 0.391228 | 0.459722 | DOWN | 366.1393 | 366.139  |
| 5463 | M420T33_ | 1.831551 | 0.873066 | 0.927977 | 0.391242 | 0.459725 | UP   | 419.8152 | 419.8145 |
| 5464 | M456T21_ | 1.436503 | 0.522561 | 0.909478 | 0.391243 | 0.459726 | UP   | 456.1679 | 456.1677 |
| 5465 | M551T22_ | 1.552762 | 0.634837 | 0.917043 | 0.391341 | 0.459753 | UP   | 551.2672 | 551.267  |
| 5466 | M267T26_ | 2.215162 | -1.14741 | -0.95485 | 0.39142  | 0.459774 | DOWN | 267.1957 | 267.1954 |
| 5467 | M449T27_ | 1.506432 | 0.591136 | 0.928522 | 0.391528 | 0.459804 | UP   | 449.1728 | 449.1725 |
| 5468 | M642T29_ | 1.842573 | -0.88172 | -0.91849 | 0.391601 | 0.459824 | DOWN | 642.2466 | 642.2453 |
| 5469 | M472T9_3 | 1.958224 | -0.96955 | -0.9158  | 0.391797 | 0.459878 | DOWN | 472.3574 | 472.3566 |
| 5470 | M228T32_ | 1.948996 | -0.96273 | -0.94559 | 0.391811 | 0.459881 | DOWN | 228.2322 | 228.232  |
| 5471 | M399T30_ | 11.0566  | 3.466836 | 0.95744  | 0.391962 | 0.459923 | UP   | 399.2021 | 399.1939 |
| 5472 | M213T28  | 1.324144 | -0.40506 | -0.91887 | 0.392042 | 0.459945 | DOWN | 213.2407 | 213.2403 |
| 5473 | M755T30  | 1.124704 | 0.169545 | 0.910497 | 0.392074 | 0.459953 | UP   | 754.5227 | 754.5215 |
| 5474 | M581T41  | 1.229737 | 0.29835  | 0.936799 | 0.392096 | 0.45996  | UP   | 581.2428 | 581.2422 |
| 5475 | M341T23  | 2.53419  | 1.341525 | 0.956173 | 0.392129 | 0.459969 | UP   | 341.2325 | 341.2325 |
| 5476 | M348T9_1 | 2.465058 | 1.301621 | 0.921887 | 0.392336 | 0.460025 | UP   | 347.6286 | 347.6278 |
| 5477 | M791T11  | 2.393931 | 1.259382 | 0.908691 | 0.392367 | 0.460034 | UP   | 791.3966 | 791.3946 |
| 5478 | M310T10  | 1.684473 | 0.752297 | 0.904921 | 0.392447 | 0.460055 | UP   | 310.1629 | 310.1628 |
| 5479 | M426T40  | 1.522319 | -0.60627 | -0.91649 | 0.392558 | 0.460086 | DOWN | 426.2906 | 426.29   |
| 5480 | M684T10_ | 3.900059 | 1.963496 | 0.939398 | 0.392565 | 0.460088 | UP   | 684.2588 | 684.2577 |
| 5481 | M357T37  | 1.442337 | 0.528408 | 0.9374   | 0.392637 | 0.460107 | UP   | 357.2312 | 357.2309 |
| 5482 | M328T26_ | 1.744422 | 0.802749 | 0.907356 | 0.392777 | 0.460146 | UP   | 328.1573 | 328.1528 |
| 5483 | M568T9   | 1.566045 | -0.64713 | -0.90976 | 0.392877 | 0.460173 | DOWN | 568.4435 | 568.4426 |
| 5484 | M314T16_ | 1.708478 | 0.772711 | 0.902873 | 0.392972 | 0.460199 | UP   | 314.1837 | 314.1834 |
| 5485 | M514T35  | 2.225723 | 1.154274 | 0.95009  | 0.393021 | 0.460212 | UP   | 514.422  | 514.4217 |
| 5486 | M519T31_ | 2.058677 | 1.041718 | 0.943468 | 0.393086 | 0.46023  | UP   | 518.9058 | 518.905  |
| 5487 | M341T10_ | 3.425872 | 1.776471 | 0.945541 | 0.393162 | 0.460251 | UP   | 341.1179 | 341.1173 |
| 5488 | M332T10_ | 2.434258 | 1.283482 | 0.923573 | 0.393201 | 0.460261 | UP   | 332.1115 | 332.1109 |
| 5489 | M835T35  | 1.546256 | 0.628779 | 0.902673 | 0.393208 | 0.460263 | UP   | 834.616  | 834.6151 |
| 5490 | M622T29  | 1.653305 | 0.725353 | 0.905483 | 0.393314 | 0.460292 | UP   | 622.2597 | 622.2581 |
| 5491 | M381T35_ | 1.331481 | 0.413032 | 0.910664 | 0.393331 | 0.460297 | UP   | 381.1733 | 381.1732 |
| 5492 | M285T14  | 1.610642 | 0.687636 | 0.906351 | 0.393374 | 0.460309 | UP   | 285.1023 | 285.1019 |
| 5493 | M478T16  | 1.78065  | 0.832404 | 0.90661  | 0.393552 | 0.460357 | UP   | 478.3529 | 478.3518 |
| 5494 | M362T11  | 1.564624 | 0.645816 | 0.901933 | 0.393566 | 0.460361 | UP   | 361.616  | 361.6147 |
| 5495 | M261T13  | 5.00267  | 2.322698 | 0.951285 | 0.393665 | 0.460388 | UP   | 261.1099 | 261.1095 |
| 5496 | M376T9_4 | 3.375748 | 1.755207 | 0.931497 | 0.39383  | 0.460433 | UP   | 376.0044 | 376.0043 |
| 5497 | M731T37  | 1.553879 | 0.635874 | 0.9013   | 0.393883 | 0.460447 | UP   | 730.5319 | 730.5305 |
| 5498 | M373T22  | 1.911837 | 0.934959 | 0.90468  | 0.39393  | 0.46046  | UP   | 372.9673 | 372.9671 |

|      |          |          |          |          |          |          |      |          |          |
|------|----------|----------|----------|----------|----------|----------|------|----------|----------|
| 5499 | M362T31_ | 1.849232 | 0.886926 | 0.920828 | 0.394379 | 0.460582 | UP   | 362.2978 | 362.2973 |
| 5500 | M412T22_ | 1.871074 | -0.90387 | -0.9376  | 0.394421 | 0.460593 | DOWN | 412.0048 | 412.0037 |
| 5501 | M461T30  | 1.611967 | 0.688822 | 0.899931 | 0.394442 | 0.460599 | UP   | 461.3737 | 461.3729 |
| 5502 | M656T24  | 2.032546 | 1.023288 | 0.905684 | 0.394467 | 0.460606 | UP   | 656.0889 | 656.0885 |
| 5503 | M468T27  | 1.432808 | -0.51885 | -0.90283 | 0.394595 | 0.46064  | DOWN | 468.2032 | 468.2026 |
| 5504 | M606T43  | 1.188661 | -0.24934 | -0.90294 | 0.394628 | 0.460649 | DOWN | 606.4271 | 606.4271 |
| 5505 | M696T41_ | 4.83991  | 2.27498  | 0.950373 | 0.394753 | 0.460683 | UP   | 695.7815 | 695.781  |
| 5506 | M428T16  | 2.112361 | 1.078856 | 0.900326 | 0.394871 | 0.460715 | UP   | 428.0794 | 428.0793 |
| 5507 | M445T11  | 1.660379 | 0.731513 | 0.899478 | 0.394988 | 0.460747 | UP   | 445.2202 | 445.2193 |
| 5508 | M245T10  | 1.547309 | 0.629761 | 0.903226 | 0.395154 | 0.460792 | UP   | 245.1862 | 245.1857 |
| 5509 | M464T18_ | 2.274123 | 1.185311 | 0.916721 | 0.395183 | 0.4608   | UP   | 464.0133 | 464.013  |
| 5510 | M577T10_ | 2.262807 | 1.178114 | 0.918778 | 0.395199 | 0.460804 | UP   | 577.3678 | 577.3654 |
| 5511 | M386T31_ | 1.952838 | -0.96557 | -0.93124 | 0.39534  | 0.460842 | DOWN | 386.2093 | 386.209  |
| 5512 | M392T44  | 1.193266 | 0.254916 | 0.904258 | 0.395375 | 0.460851 | UP   | 392.228  | 392.2276 |
| 5513 | M242T16  | 1.792881 | 0.842279 | 0.899038 | 0.395404 | 0.460859 | UP   | 242.0688 | 242.0684 |
| 5514 | M261T17  | 1.545165 | 0.627761 | 0.903382 | 0.395419 | 0.460863 | UP   | 261.0525 | 261.0524 |
| 5515 | M315T30_ | 1.894848 | 0.922082 | 0.898605 | 0.395459 | 0.460874 | UP   | 314.6392 | 314.6389 |
| 5516 | M628T26  | 2.712852 | 1.43981  | 0.944044 | 0.395469 | 0.460877 | UP   | 628.1845 | 628.1831 |
| 5517 | M251T25  | 1.977385 | -0.98359 | -0.93805 | 0.395553 | 0.460899 | DOWN | 251.128  | 251.1274 |
| 5518 | M225T37  | 1.235984 | 0.305661 | 0.937088 | 0.39575  | 0.460953 | UP   | 225.0603 | 225.0602 |
| 5519 | M269T26_ | 1.8514   | 0.888617 | 0.90975  | 0.395875 | 0.460986 | UP   | 269.1031 | 269.1025 |
| 5520 | M281T22  | 1.839765 | -0.87952 | -0.92673 | 0.395996 | 0.461019 | DOWN | 281.0452 | 281.0446 |
| 5521 | M438T19  | 2.280485 | 1.18934  | 0.935646 | 0.396138 | 0.461057 | UP   | 438.3693 | 438.3683 |
| 5522 | M601T11  | 2.10764  | -1.07563 | -0.90648 | 0.39615  | 0.461061 | DOWN | 601.3707 | 601.3696 |
| 5523 | M349T32_ | 1.759186 | 0.814908 | 0.898546 | 0.39615  | 0.461061 | UP   | 349.295  | 349.2943 |
| 5524 | M341T10_ | 2.96595  | 1.568494 | 0.933616 | 0.396552 | 0.461169 | UP   | 340.9074 | 340.9065 |
| 5525 | M315T10_ | 1.505432 | 0.590178 | 0.895337 | 0.396748 | 0.461221 | UP   | 315.1092 | 315.1082 |
| 5526 | M373T21_ | 1.768838 | 0.822802 | 0.901567 | 0.39682  | 0.461241 | UP   | 372.7681 | 372.7673 |
| 5527 | M299T27_ | 1.613512 | 0.690204 | 0.895138 | 0.396848 | 0.461248 | UP   | 299.1272 | 299.1271 |
| 5528 | M347T13_ | 1.571447 | 0.652094 | 0.898924 | 0.396853 | 0.46125  | UP   | 347.2221 | 347.2214 |
| 5529 | M355T10  | 1.773994 | 0.827001 | 0.902168 | 0.397079 | 0.46131  | UP   | 355.2234 | 355.2224 |
| 5530 | M516T11_ | 1.858651 | 0.894256 | 0.896454 | 0.397089 | 0.461313 | UP   | 516.3746 | 516.374  |
| 5531 | M505T29_ | 1.867076 | 0.90078  | 0.909686 | 0.397108 | 0.461318 | UP   | 504.9542 | 504.9539 |
| 5532 | M458T9_1 | 1.60861  | -0.68581 | -0.89739 | 0.397321 | 0.461375 | DOWN | 457.5739 | 457.5723 |
| 5533 | M1050T10 | 2.295925 | 1.199075 | 0.921098 | 0.397365 | 0.461387 | UP   | 1049.727 | 1049.724 |
| 5534 | M285T23_ | 1.879752 | 0.910543 | 0.899369 | 0.397542 | 0.461435 | UP   | 284.9904 | 284.9903 |
| 5535 | M277T10_ | 1.804298 | 0.851437 | 0.895436 | 0.397647 | 0.461463 | UP   | 276.7283 | 276.7276 |
| 5536 | M314T26_ | 1.760673 | -0.81613 | -0.91585 | 0.397677 | 0.461471 | DOWN | 314.2885 | 314.2882 |
| 5537 | M470T11_ | 2.707644 | 1.437038 | 0.923807 | 0.397678 | 0.461471 | UP   | 470.343  | 470.3417 |
| 5538 | M536T22_ | 1.80703  | 0.853621 | 0.894343 | 0.397722 | 0.461483 | UP   | 536.0671 | 536.0668 |
| 5539 | M506T33  | 2.146216 | -1.1018  | -0.92929 | 0.397903 | 0.461531 | DOWN | 506.3601 | 506.3599 |
| 5540 | M339T15_ | 1.689416 | 0.756525 | 0.892873 | 0.398053 | 0.461571 | UP   | 339.1529 | 339.1522 |
| 5541 | M480T9_2 | 2.245101 | 1.16678  | 0.902522 | 0.398083 | 0.461579 | UP   | 480.3027 | 480.3013 |
| 5542 | M653T38  | 1.683432 | 0.751406 | 0.901221 | 0.398085 | 0.46158  | UP   | 653.4638 | 653.4626 |
| 5543 | M430T23_ | 1.356616 | 0.440012 | 0.895423 | 0.398095 | 0.461583 | UP   | 430.2228 | 430.2225 |
| 5544 | M355T12  | 1.628691 | 0.703713 | 0.892304 | 0.398275 | 0.461631 | UP   | 355.2384 | 355.2382 |
| 5545 | M295T26_ | 1.593173 | 0.671903 | 0.892395 | 0.398295 | 0.461636 | UP   | 295.2098 | 295.2094 |

|      |          |          |          |          |          |          |      |          |          |
|------|----------|----------|----------|----------|----------|----------|------|----------|----------|
| 5546 | M200T18  | 1.889852 | -0.91827 | -0.91516 | 0.398536 | 0.461701 | DOWN | 200.1001 | 200.0995 |
| 5547 | M389T14  | 4.343844 | -2.11897 | -0.94131 | 0.398606 | 0.461719 | DOWN | 389.1822 | 389.1816 |
| 5548 | M304T35  | 1.560054 | -0.6416  | -0.92918 | 0.398653 | 0.461732 | DOWN | 304.2637 | 304.2633 |
| 5549 | M640T34  | 3.387365 | 1.760164 | 0.93231  | 0.398896 | 0.461797 | UP   | 639.7718 | 639.7716 |
| 5550 | M327T26  | 2.439417 | -1.28654 | -0.94081 | 0.398977 | 0.461818 | DOWN | 327.1495 | 327.1487 |
| 5551 | M594T33  | 3.911526 | -1.96773 | -0.93923 | 0.399257 | 0.461893 | DOWN | 594.3541 | 594.3529 |
| 5552 | M246T28  | 1.512234 | -0.59668 | -0.89717 | 0.399527 | 0.461965 | DOWN | 246.1026 | 246.1024 |
| 5553 | M586T43  | 1.850476 | 0.887896 | 0.922105 | 0.39959  | 0.461981 | UP   | 586.3568 | 586.3555 |
| 5554 | M443T35_ | 1.56682  | 0.647839 | 0.893231 | 0.399765 | 0.462028 | UP   | 442.5626 | 442.562  |
| 5555 | M511T20_ | 2.981637 | -1.5761  | -0.92945 | 0.399829 | 0.462045 | DOWN | 511.2361 | 511.2357 |
| 5556 | M465T21  | 1.468919 | -0.55475 | -0.88982 | 0.399945 | 0.462076 | DOWN | 465.173  | 465.1725 |
| 5557 | M338T17_ | 1.921258 | 0.942051 | 0.891111 | 0.399956 | 0.462078 | UP   | 337.7048 | 337.7047 |
| 5558 | M598T32  | 2.113975 | -1.07996 | -0.92052 | 0.399973 | 0.462083 | DOWN | 598.3511 | 598.3507 |
| 5559 | M452T29  | 1.561471 | -0.64291 | -0.91202 | 0.400013 | 0.462094 | DOWN | 452.2081 | 452.2079 |
| 5560 | M688T37_ | 1.586749 | 0.666074 | 0.888955 | 0.40008  | 0.462111 | UP   | 687.5089 | 687.5083 |
| 5561 | M502T13  | 13.21682 | -3.7243  | -0.94039 | 0.400105 | 0.462118 | DOWN | 502.1163 | 502.1163 |
| 5562 | M426T45  | 1.112137 | 0.153335 | 0.891729 | 0.400114 | 0.462121 | UP   | 425.8362 | 425.8357 |
| 5563 | M660T9_1 | 2.910705 | 1.541368 | 0.914056 | 0.400168 | 0.462135 | UP   | 659.5044 | 659.5028 |
| 5564 | M680T10_ | 1.900898 | 0.926681 | 0.911062 | 0.400247 | 0.462156 | UP   | 680.497  | 680.4946 |
| 5565 | M759T44  | 1.21252  | 0.278008 | 0.891338 | 0.40044  | 0.462207 | UP   | 759.3772 | 759.3763 |
| 5566 | M499T40  | 1.972205 | 0.979809 | 0.934434 | 0.400446 | 0.462208 | UP   | 499.3419 | 499.3413 |
| 5567 | M512T9   | 2.361509 | 1.239709 | 0.921815 | 0.400477 | 0.462217 | UP   | 511.9107 | 511.9093 |
| 5568 | M196T21  | 1.557049 | 0.638814 | 0.887933 | 0.400486 | 0.462219 | UP   | 196.105  | 196.1046 |
| 5569 | M513T27_ | 1.561241 | -0.64269 | -0.90246 | 0.400507 | 0.462225 | DOWN | 513.3452 | 513.3445 |
| 5570 | M409T22_ | 2.475657 | -1.30781 | -0.93256 | 0.400508 | 0.462225 | DOWN | 409.0018 | 409.0015 |
| 5571 | M496T36  | 1.598577 | 0.676788 | 0.888081 | 0.400525 | 0.462229 | UP   | 496.3843 | 496.3836 |
| 5572 | M261T22  | 1.69547  | 0.761685 | 0.888291 | 0.400773 | 0.462314 | UP   | 261.0786 | 261.0785 |
| 5573 | M327T22_ | 1.742398 | 0.801074 | 0.918779 | 0.400803 | 0.462324 | UP   | 327.1144 | 327.1141 |
| 5574 | M365T11_ | 1.458461 | 0.544447 | 0.888512 | 0.400969 | 0.462381 | UP   | 365.2237 | 365.2221 |
| 5575 | M671T29  | 1.848345 | 0.886234 | 0.886462 | 0.401235 | 0.462472 | UP   | 671.2249 | 671.2249 |
| 5576 | M466T38  | 1.564811 | 0.645988 | 0.889479 | 0.401358 | 0.462514 | UP   | 466.3739 | 466.3735 |
| 5577 | M484T42  | 1.088229 | 0.121982 | 0.891822 | 0.401546 | 0.462578 | UP   | 484.1288 | 484.1278 |
| 5578 | M463T21_ | 2.051432 | 1.036632 | 0.892512 | 0.401589 | 0.462592 | UP   | 463.0355 | 463.0353 |
| 5579 | M554T42_ | 1.072101 | 0.100441 | 0.890763 | 0.401801 | 0.462664 | UP   | 553.7251 | 553.7236 |
| 5580 | M660T28_ | 2.050193 | 1.03576  | 0.926826 | 0.401852 | 0.462682 | UP   | 660.4959 | 660.4947 |
| 5581 | M498T29  | 5.690902 | 2.508657 | 0.935173 | 0.401906 | 0.4627   | UP   | 498.3638 | 498.3631 |
| 5582 | M547T29_ | 1.554974 | 0.636891 | 0.887465 | 0.401921 | 0.462705 | UP   | 547.2988 | 547.2979 |
| 5583 | M306T18  | 2.52856  | 1.338316 | 0.929143 | 0.402229 | 0.46281  | UP   | 306.1967 | 306.1967 |
| 5584 | M401T23  | 2.620413 | -1.38979 | -0.92355 | 0.40226  | 0.46282  | DOWN | 401.0634 | 401.0626 |
| 5585 | M383T22_ | 1.76859  | 0.8226   | 0.89106  | 0.402305 | 0.462836 | UP   | 383.1762 | 383.1755 |
| 5586 | M227T10_ | 2.327365 | 1.218697 | 0.888163 | 0.402472 | 0.462892 | UP   | 227.0981 | 227.0977 |
| 5587 | M295T25_ | 1.269427 | 0.344177 | 0.893284 | 0.402568 | 0.462925 | UP   | 295.0995 | 295.099  |
| 5588 | M425T20  | 1.586854 | 0.666169 | 0.892779 | 0.402627 | 0.462945 | UP   | 425.244  | 425.2429 |
| 5589 | M393T26_ | 1.755559 | 0.811931 | 0.901389 | 0.402981 | 0.463065 | UP   | 393.2645 | 393.2639 |
| 5590 | M649T23  | 2.066204 | 1.046983 | 0.883162 | 0.40334  | 0.463186 | UP   | 648.8667 | 648.866  |
| 5591 | M638T43_ | 1.293669 | 0.371468 | 0.886521 | 0.40336  | 0.463193 | UP   | 638.4573 | 638.4559 |
| 5592 | M585T43  | 1.713322 | 0.776796 | 0.891134 | 0.403466 | 0.463229 | UP   | 585.3536 | 585.3527 |

|      |          |          |          |          |          |          |      |          |          |
|------|----------|----------|----------|----------|----------|----------|------|----------|----------|
| 5593 | M495T17_ | 2.030279 | 1.021678 | 0.890488 | 0.403828 | 0.463351 | UP   | 495.3511 | 495.3507 |
| 5594 | M377T10_ | 3.21692  | 1.68568  | 0.910674 | 0.403847 | 0.463358 | UP   | 376.8302 | 376.83   |
| 5595 | M324T29  | 1.689028 | 0.756193 | 0.897445 | 0.403852 | 0.463359 | UP   | 324.1454 | 324.1452 |
| 5596 | M501T38  | 2.19724  | 1.135692 | 0.881505 | 0.403929 | 0.463385 | UP   | 501.0899 | 501.0895 |
| 5597 | M567T31  | 1.987528 | 0.990975 | 0.898355 | 0.403932 | 0.463386 | UP   | 567.0448 | 567.0441 |
| 5598 | M504T21_ | 1.990878 | 0.993405 | 0.884952 | 0.403946 | 0.463391 | UP   | 504.0619 | 504.0611 |
| 5599 | M345T11_ | 1.809992 | 0.855983 | 0.885395 | 0.403948 | 0.463392 | UP   | 345.1771 | 345.1769 |
| 5600 | M404T10_ | 1.849154 | 0.886866 | 0.883805 | 0.404024 | 0.463417 | UP   | 404.1469 | 404.1454 |
| 5601 | M205T31  | 1.418573 | 0.504441 | 0.880891 | 0.404236 | 0.463489 | UP   | 205.086  | 205.0856 |
| 5602 | M363T22_ | 1.854065 | 0.890692 | 0.882207 | 0.404248 | 0.463493 | UP   | 362.9829 | 362.9825 |
| 5603 | M794T29  | 1.71437  | 0.777678 | 0.880708 | 0.404332 | 0.463521 | UP   | 793.5723 | 793.5708 |
| 5604 | M508T22_ | 1.700719 | 0.766144 | 0.893776 | 0.404412 | 0.463548 | UP   | 507.9054 | 507.9053 |
| 5605 | M405T22_ | 1.9026   | 0.927972 | 0.883849 | 0.404451 | 0.463561 | UP   | 405.0299 | 405.0294 |
| 5606 | M391T19  | 1.510546 | 0.59507  | 0.884353 | 0.404584 | 0.463606 | UP   | 391.0572 | 391.0564 |
| 5607 | M252T13  | 1.586443 | 0.665796 | 0.880763 | 0.404594 | 0.463609 | UP   | 252.2437 | 252.2432 |
| 5608 | M655T9_2 | 2.086926 | 1.061379 | 0.882403 | 0.404762 | 0.463666 | UP   | 654.9634 | 654.957  |
| 5609 | M204T10_ | 2.689623 | 1.427404 | 0.913926 | 0.405068 | 0.463769 | UP   | 203.7902 | 203.7898 |
| 5610 | M479T27  | 1.69606  | 0.762187 | 0.883886 | 0.40526  | 0.463833 | UP   | 479.0089 | 479.0088 |
| 5611 | M403T16_ | 2.050339 | 1.035862 | 0.878524 | 0.405272 | 0.463838 | UP   | 403.1207 | 403.1199 |
| 5612 | M546T43  | 1.449171 | 0.535228 | 0.883384 | 0.405318 | 0.463853 | UP   | 546.3423 | 546.3414 |
| 5613 | M458T20  | 1.959266 | 0.970313 | 0.879861 | 0.405434 | 0.463892 | UP   | 458.0566 | 458.0561 |
| 5614 | M575T23  | 1.892716 | 0.920458 | 0.882402 | 0.405563 | 0.463935 | UP   | 574.9556 | 574.9555 |
| 5615 | M313T22_ | 1.744946 | -0.80318 | -0.89424 | 0.405563 | 0.463935 | DOWN | 313.1215 | 313.1212 |
| 5616 | M951T44  | 1.140721 | -0.18995 | -0.8894  | 0.405818 | 0.464021 | DOWN | 950.5963 | 950.5947 |
| 5617 | M466T16  | 1.454677 | 0.540699 | 0.878146 | 0.406058 | 0.464101 | UP   | 466.3168 | 466.3156 |
| 5618 | M346T22_ | 1.985303 | 0.989359 | 0.8844   | 0.406085 | 0.46411  | UP   | 345.98   | 345.9798 |
| 5619 | M363T11_ | 3.304525 | 1.724443 | 0.908881 | 0.406177 | 0.464141 | UP   | 363.1973 | 363.192  |
| 5620 | M658T9_1 | 2.472807 | 1.30615  | 0.892838 | 0.406241 | 0.464163 | UP   | 657.5931 | 657.5925 |
| 5621 | M348T10_ | 2.607177 | 1.382489 | 0.901923 | 0.406384 | 0.464211 | UP   | 348.1463 | 348.1455 |
| 5622 | M233T12  | 1.673776 | 0.743106 | 0.877727 | 0.406394 | 0.464214 | UP   | 233.1109 | 233.1105 |
| 5623 | M333T10_ | 2.383214 | 1.252908 | 0.892344 | 0.40644  | 0.464229 | UP   | 333.4688 | 333.4678 |
| 5624 | M349T9_1 | 2.309222 | 1.207407 | 0.889503 | 0.406502 | 0.46425  | UP   | 348.7136 | 348.7127 |
| 5625 | M469T29  | 1.943327 | 0.958529 | 0.878945 | 0.406584 | 0.464277 | UP   | 469.072  | 469.0718 |
| 5626 | M395T11_ | 3.225461 | 1.689506 | 0.900739 | 0.40677  | 0.464339 | UP   | 394.9552 | 394.9547 |
| 5627 | M366T10_ | 4.765629 | 2.252667 | 0.925433 | 0.406926 | 0.464392 | UP   | 366.178  | 366.177  |
| 5628 | M534T26  | 1.924241 | 0.944289 | 0.899185 | 0.407006 | 0.464418 | UP   | 533.9663 | 533.966  |
| 5629 | M441T12  | 1.684933 | 0.752691 | 0.875188 | 0.407091 | 0.464447 | UP   | 441.3114 | 441.3113 |
| 5630 | M313T11_ | 1.425596 | 0.511565 | 0.87555  | 0.407106 | 0.464452 | UP   | 313.2205 | 313.2201 |
| 5631 | M367T10_ | 1.893526 | 0.921075 | 0.876449 | 0.407281 | 0.46451  | UP   | 366.7163 | 366.7152 |
| 5632 | M699T10_ | 1.887441 | 0.916431 | 0.881075 | 0.407322 | 0.464524 | UP   | 698.9886 | 698.9858 |
| 5633 | M648T10  | 2.838097 | 1.504924 | 0.889479 | 0.407615 | 0.464621 | UP   | 648.1241 | 648.1225 |
| 5634 | M485T23_ | 1.711625 | 0.775367 | 0.875819 | 0.40772  | 0.464656 | UP   | 485.2674 | 485.2668 |
| 5635 | M580T10  | 2.133286 | 1.093077 | 0.896633 | 0.407739 | 0.464663 | UP   | 580.423  | 580.4226 |
| 5636 | M219T10_ | 1.491613 | 0.576874 | 0.873914 | 0.407755 | 0.464668 | UP   | 218.6622 | 218.6615 |
| 5637 | M596T11_ | 1.801717 | 0.849372 | 0.876419 | 0.407857 | 0.464702 | UP   | 596.4115 | 596.4106 |
| 5638 | M607T23_ | 2.336788 | 1.224527 | 0.888065 | 0.408025 | 0.464758 | UP   | 606.9613 | 606.961  |
| 5639 | M300T26_ | 1.872806 | 0.905201 | 0.87346  | 0.408105 | 0.464785 | UP   | 300.1259 | 300.1255 |



|      |          |          |          |          |          |          |      |          |          |
|------|----------|----------|----------|----------|----------|----------|------|----------|----------|
| 5640 | M402T12  | 1.720138 | 0.782524 | 0.874041 | 0.408199 | 0.464816 | UP   | 401.7524 | 401.7523 |
| 5641 | M325T17_ | 1.707352 | 0.77176  | 0.89556  | 0.408311 | 0.464853 | UP   | 325.0221 | 325.0219 |
| 5642 | M904T11  | 2.442317 | 1.28825  | 0.882404 | 0.408345 | 0.464864 | UP   | 904.3717 | 904.3707 |
| 5643 | M376T20_ | 1.649938 | 0.722412 | 0.874346 | 0.408563 | 0.464937 | UP   | 376.2597 | 376.2586 |
| 5644 | M216T11  | 1.556246 | 0.638071 | 0.876877 | 0.408621 | 0.464956 | UP   | 216.1749 | 216.1745 |
| 5645 | M721T34  | 3.204266 | 1.679994 | 0.913545 | 0.408657 | 0.464968 | UP   | 720.5116 | 720.5109 |
| 5646 | M373T19_ | 1.628882 | 0.703882 | 0.87634  | 0.408814 | 0.46502  | UP   | 373.272  | 373.2712 |
| 5647 | M495T24  | 1.717282 | 0.780127 | 0.871502 | 0.408879 | 0.465042 | UP   | 495.1802 | 495.1791 |
| 5648 | M517T35  | 2.856274 | 1.514134 | 0.909239 | 0.408971 | 0.465072 | UP   | 517.371  | 517.3704 |
| 5649 | M623T29_ | 1.641589 | 0.715093 | 0.873898 | 0.409034 | 0.465093 | UP   | 623.2628 | 623.2614 |
| 5650 | M485T13  | 2.549947 | 1.350468 | 0.879313 | 0.409061 | 0.465102 | UP   | 485.0672 | 485.0668 |
| 5651 | M356T19_ | 1.582011 | 0.661759 | 0.871218 | 0.409086 | 0.46511  | UP   | 356.1132 | 356.1128 |
| 5652 | M498T36  | 1.581221 | 0.661039 | 0.887943 | 0.409165 | 0.465136 | UP   | 498.391  | 498.389  |
| 5653 | M601T31  | 1.718592 | 0.781227 | 0.874023 | 0.409191 | 0.465145 | UP   | 601.2784 | 601.2773 |
| 5654 | M925T29  | 2.22732  | 1.155309 | 0.888739 | 0.409262 | 0.465169 | UP   | 924.648  | 924.6469 |
| 5655 | M408T10  | 1.792315 | 0.841824 | 0.871035 | 0.409298 | 0.465181 | UP   | 408.2939 | 408.2928 |
| 5656 | M522T32_ | 1.625537 | -0.70092 | -0.873   | 0.409412 | 0.465219 | DOWN | 522.3252 | 522.3115 |
| 5657 | M903T11  | 2.345124 | 1.229664 | 0.876801 | 0.409426 | 0.465223 | UP   | 903.3696 | 903.3673 |
| 5658 | M706T32_ | 2.035364 | 1.025287 | 0.900334 | 0.409721 | 0.465321 | UP   | 705.5785 | 705.5778 |
| 5659 | M308T35  | 1.752067 | 0.809058 | 0.87064  | 0.409897 | 0.465379 | UP   | 308.2799 | 308.2792 |
| 5660 | M1971T10 | 2.723045 | 1.445221 | 0.894735 | 0.409949 | 0.465396 | UP   | 1971.14  | 1971.135 |
| 5661 | M434T44_ | 1.1276   | -0.17326 | -0.88118 | 0.409953 | 0.465397 | DOWN | 434.2746 | 434.2743 |
| 5662 | M395T18  | 1.499815 | 0.584785 | 0.869474 | 0.410335 | 0.465523 | UP   | 395.3179 | 395.3174 |
| 5663 | M301T36  | 1.452966 | -0.539   | -0.87039 | 0.411035 | 0.465754 | DOWN | 301.2931 | 301.2927 |
| 5664 | M376T10_ | 2.800447 | 1.485657 | 0.884286 | 0.411108 | 0.465778 | UP   | 376.1088 | 376.1082 |
| 5665 | M577T32_ | 2.415539 | 1.272345 | 0.873682 | 0.411165 | 0.465797 | UP   | 576.777  | 576.7766 |
| 5666 | M345T23_ | 1.866898 | -0.90064 | -0.89501 | 0.411236 | 0.465821 | DOWN | 345.3111 | 345.3108 |
| 5667 | M439T19  | 2.617518 | 1.3882   | 0.908829 | 0.411259 | 0.465828 | UP   | 439.3727 | 439.372  |
| 5668 | M341T38  | 1.329755 | 0.41116  | 0.866996 | 0.411307 | 0.465844 | UP   | 341.3243 | 341.3239 |
| 5669 | M342T10_ | 2.39034  | 1.257216 | 0.873291 | 0.411331 | 0.465852 | UP   | 342.4666 | 342.4659 |
| 5670 | M167T23  | 1.485258 | -0.57071 | -0.89433 | 0.411348 | 0.465857 | DOWN | 166.9859 | 166.9855 |
| 5671 | M465T11  | 3.942535 | 1.979124 | 0.899473 | 0.411535 | 0.465919 | UP   | 465.0335 | 465.0331 |
| 5672 | M333T9_4 | 2.530732 | 1.339555 | 0.901679 | 0.411657 | 0.465959 | UP   | 333.2066 | 333.2054 |
| 5673 | M799T30  | 1.128942 | 0.174971 | 0.874883 | 0.411833 | 0.466017 | UP   | 798.549  | 798.5475 |
| 5674 | M186T21  | 2.016893 | -1.01213 | -0.90464 | 0.412003 | 0.466073 | DOWN | 186.1853 | 186.1851 |
| 5675 | M334T10_ | 2.097403 | 1.068604 | 0.87843  | 0.412025 | 0.46608  | UP   | 333.8131 | 333.8124 |
| 5676 | M628T11_ | 1.722505 | 0.784508 | 0.865705 | 0.412099 | 0.466104 | UP   | 628.4372 | 628.4356 |
| 5677 | M424T13_ | 1.430164 | 0.516181 | 0.866952 | 0.412239 | 0.46615  | UP   | 424.3061 | 424.3054 |
| 5678 | M452T36  | 1.568292 | 0.649194 | 0.865041 | 0.412333 | 0.466181 | UP   | 452.3583 | 452.3575 |
| 5679 | M588T23  | 2.830872 | 1.501247 | 0.901013 | 0.412408 | 0.466206 | UP   | 588.4324 | 588.4317 |
| 5680 | M308T13  | 1.599056 | 0.67722  | 0.86659  | 0.41248  | 0.466229 | UP   | 308.2588 | 308.2583 |
| 5681 | M269T14  | 1.730475 | 0.791168 | 0.865494 | 0.412547 | 0.466251 | UP   | 269.0797 | 269.0792 |
| 5682 | M505T44_ | 1.093579 | 0.129057 | 0.864695 | 0.412572 | 0.466259 | UP   | 504.8735 | 504.8727 |
| 5683 | M569T41  | 1.344716 | -0.4273  | -0.88194 | 0.412647 | 0.466284 | DOWN | 569.4606 | 569.4596 |
| 5684 | M477T21  | 1.562695 | 0.644036 | 0.866674 | 0.412658 | 0.466287 | UP   | 477.3691 | 477.3678 |
| 5685 | M344T24  | 1.700408 | 0.765881 | 0.864324 | 0.4128   | 0.466334 | UP   | 344.1311 | 344.1199 |
| 5686 | M387T22_ | 1.845139 | 0.88373  | 0.865357 | 0.412889 | 0.466363 | UP   | 387.0068 | 387.0064 |

|      |          |          |          |          |          |          |      |          |          |
|------|----------|----------|----------|----------|----------|----------|------|----------|----------|
| 5687 | M396T19_ | 1.500705 | 0.58564  | 0.867948 | 0.412935 | 0.466378 | UP   | 395.5848 | 395.584  |
| 5688 | M546T14  | 2.109583 | 1.076958 | 0.863488 | 0.413086 | 0.466427 | UP   | 546.1791 | 546.1787 |
| 5689 | M299T11_ | 1.667143 | 0.737378 | 0.864601 | 0.413353 | 0.466515 | UP   | 298.7092 | 298.7089 |
| 5690 | M485T9_2 | 2.971577 | -1.57123 | -0.90328 | 0.413562 | 0.466583 | DOWN | 484.8012 | 484.8003 |
| 5691 | M235T15  | 1.502028 | 0.586912 | 0.880919 | 0.413696 | 0.466627 | UP   | 235.1066 | 235.1065 |
| 5692 | M603T30  | 1.105308 | 0.144449 | 0.879626 | 0.413779 | 0.466654 | UP   | 603.4108 | 603.4096 |
| 5693 | M555T38  | 1.61875  | 0.69488  | 0.861951 | 0.41381  | 0.466664 | UP   | 555.4297 | 555.429  |
| 5694 | M303T22_ | 1.445347 | -0.53142 | -0.87426 | 0.413982 | 0.46672  | DOWN | 303.1482 | 303.1475 |
| 5695 | M379T12_ | 1.717801 | 0.780563 | 0.862189 | 0.414125 | 0.466766 | UP   | 379.1293 | 379.1285 |
| 5696 | M394T18_ | 1.454066 | 0.540093 | 0.863287 | 0.414183 | 0.466785 | UP   | 394.3146 | 394.314  |
| 5697 | M476T28  | 1.616229 | 0.692632 | 0.866045 | 0.414355 | 0.466841 | UP   | 476.3597 | 476.3589 |
| 5698 | M286T19_ | 1.51331  | 0.597707 | 0.860968 | 0.414432 | 0.466867 | UP   | 286.2016 | 286.2016 |
| 5699 | M754T10  | 2.061345 | 1.043586 | 0.87454  | 0.414512 | 0.466892 | UP   | 754.4813 | 754.4811 |
| 5700 | M408T20_ | 1.716712 | 0.779648 | 0.900418 | 0.414815 | 0.466991 | UP   | 408.2095 | 408.2093 |
| 5701 | M500T18_ | 1.562183 | 0.643564 | 0.860662 | 0.414977 | 0.467044 | UP   | 500.154  | 500.1531 |
| 5702 | M559T18  | 1.835047 | 0.875817 | 0.859761 | 0.415004 | 0.467052 | UP   | 559.0227 | 559.0225 |
| 5703 | M226T14  | 1.762696 | 0.817784 | 0.867787 | 0.41509  | 0.46708  | UP   | 226.0527 | 226.0522 |
| 5704 | M229T10_ | 1.94315  | 0.958397 | 0.862238 | 0.415096 | 0.467082 | UP   | 229.0959 | 229.0956 |
| 5705 | M1737T10 | 2.262793 | 1.178105 | 0.85928  | 0.415668 | 0.467268 | UP   | 1737.448 | 1737.446 |
| 5706 | M331T24  | 1.742023 | 0.800763 | 0.857797 | 0.41599  | 0.467372 | UP   | 331.229  | 331.2268 |
| 5707 | M345T28  | 1.540591 | 0.623484 | 0.873614 | 0.416031 | 0.467385 | UP   | 345.1727 | 345.1724 |
| 5708 | M262T26_ | 1.620406 | 0.696356 | 0.859642 | 0.416165 | 0.467429 | UP   | 262.1195 | 262.1193 |
| 5709 | M1749T9_ | 2.640781 | 1.400965 | 0.868903 | 0.416282 | 0.467467 | UP   | 1748.728 | 1748.727 |
| 5710 | M473T32_ | 1.935753 | 0.952895 | 0.880337 | 0.4163   | 0.467473 | UP   | 472.9645 | 472.9643 |
| 5711 | M225T19  | 1.857943 | 0.893706 | 0.859973 | 0.416312 | 0.467476 | UP   | 224.6207 | 224.6206 |
| 5712 | M483T9_1 | 2.19983  | 1.137392 | 0.860998 | 0.416387 | 0.467501 | UP   | 482.8026 | 482.8015 |
| 5713 | M570T41  | 1.51368  | -0.59806 | -0.874   | 0.416395 | 0.467503 | DOWN | 570.4645 | 570.463  |
| 5714 | M397T22_ | 1.995114 | -0.99647 | -0.88577 | 0.416439 | 0.467517 | DOWN | 396.9977 | 396.9972 |
| 5715 | M649T16  | 2.13867  | 1.096714 | 0.856624 | 0.416594 | 0.467567 | UP   | 648.9762 | 648.9761 |
| 5716 | M317T15  | 1.509423 | 0.593998 | 0.859512 | 0.416635 | 0.467581 | UP   | 317.2115 | 317.2111 |
| 5717 | M428T10  | 1.979355 | 0.98503  | 0.85729  | 0.416661 | 0.467589 | UP   | 428.224  | 428.2236 |
| 5718 | M703T18  | 1.734059 | 0.794153 | 0.856306 | 0.416739 | 0.467614 | UP   | 703.1181 | 703.1174 |
| 5719 | M182T10_ | 1.539645 | 0.622598 | 0.856646 | 0.416745 | 0.467616 | UP   | 182.1541 | 182.1535 |
| 5720 | M158T15  | 1.370026 | 0.454203 | 0.858467 | 0.416812 | 0.467638 | UP   | 158.1539 | 158.1536 |
| 5721 | M417T21_ | 1.911372 | 0.934608 | 0.857588 | 0.4169   | 0.467666 | UP   | 417.03   | 417.0294 |
| 5722 | M710T28  | 2.506561 | -1.32571 | -0.88197 | 0.416965 | 0.467687 | DOWN | 710.1373 | 710.1358 |
| 5723 | M399T7   | 3.871961 | 1.953064 | 0.897478 | 0.416995 | 0.467697 | UP   | 398.8269 | 398.8257 |
| 5724 | M625T30_ | 1.699785 | 0.765352 | 0.858411 | 0.417214 | 0.467768 | UP   | 625.2783 | 625.2775 |
| 5725 | M341T15  | 1.73026  | 0.790989 | 0.855383 | 0.417333 | 0.467806 | UP   | 341.1488 | 341.1485 |
| 5726 | M370T9   | 2.818262 | 1.494806 | 0.873902 | 0.417452 | 0.467844 | UP   | 369.6083 | 369.6076 |
| 5727 | M393T18  | 1.447067 | 0.533132 | 0.857052 | 0.4175   | 0.46786  | UP   | 393.3113 | 393.3106 |
| 5728 | M424T10_ | 1.776978 | 0.829426 | 0.862946 | 0.417549 | 0.467876 | UP   | 424.2874 | 424.2791 |
| 5729 | M419T22  | 1.850272 | 0.887738 | 0.856767 | 0.417777 | 0.467949 | UP   | 419.0455 | 419.0448 |
| 5730 | M453T9_1 | 1.750529 | 0.807791 | 0.882565 | 0.417786 | 0.467952 | UP   | 452.7394 | 452.7322 |
| 5731 | M266T26_ | 1.890503 | 0.91877  | 0.864889 | 0.417873 | 0.46798  | UP   | 266.1044 | 266.1039 |
| 5732 | M652T23  | 1.899083 | 0.925303 | 0.857727 | 0.417942 | 0.468002 | UP   | 651.8645 | 651.8642 |
| 5733 | M722T29  | 1.877301 | 0.90866  | 0.858861 | 0.418061 | 0.46804  | UP   | 722.1901 | 722.1887 |

|      |          |          |          |          |          |          |      |          |          |
|------|----------|----------|----------|----------|----------|----------|------|----------|----------|
| 5734 | M334T10_ | 2.500553 | 1.322247 | 0.880523 | 0.418073 | 0.468044 | UP   | 333.9548 | 333.9543 |
| 5735 | M647T22  | 1.763919 | 0.818784 | 0.860266 | 0.418111 | 0.468056 | UP   | 647.4418 | 647.441  |
| 5736 | M347T21_ | 1.59714  | 0.675491 | 0.85846  | 0.418123 | 0.46806  | UP   | 347.3206 | 347.3144 |
| 5737 | M554T18  | 1.555507 | 0.637385 | 0.856552 | 0.418177 | 0.468078 | UP   | 554.2296 | 554.2285 |
| 5738 | M546T27  | 1.863341 | -0.89789 | -0.87947 | 0.418261 | 0.468105 | DOWN | 546.0082 | 546.0077 |
| 5739 | M374T19_ | 1.583595 | 0.663203 | 0.857577 | 0.418378 | 0.468142 | UP   | 373.7735 | 373.7728 |
| 5740 | M313T11_ | 1.814484 | 0.859559 | 0.858478 | 0.418459 | 0.468168 | UP   | 313.2494 | 313.2486 |
| 5741 | M215T21  | 1.300572 | 0.379146 | 0.857206 | 0.418511 | 0.468185 | UP   | 215.1644 | 215.1643 |
| 5742 | M389T9_2 | 1.725032 | -0.78662 | -0.8533  | 0.418517 | 0.468187 | DOWN | 389.3198 | 389.3195 |
| 5743 | M620T29  | 1.549141 | 0.631469 | 0.853801 | 0.418656 | 0.468231 | UP   | 620.2645 | 620.2638 |
| 5744 | M669T43_ | 1.172367 | 0.229424 | 0.883233 | 0.418664 | 0.468234 | UP   | 669.4853 | 669.4837 |
| 5745 | M331T26_ | 4.253663 | -2.08871 | -0.89778 | 0.41876  | 0.468265 | DOWN | 331.1879 | 331.1878 |
| 5746 | M277T10_ | 1.796673 | 0.845328 | 0.854308 | 0.418882 | 0.468304 | UP   | 277.2301 | 277.2292 |
| 5747 | M305T33_ | 1.573379 | 0.653866 | 0.852516 | 0.41894  | 0.468322 | UP   | 305.2515 | 305.2509 |
| 5748 | M479T16  | 1.703779 | 0.768739 | 0.854914 | 0.419072 | 0.468365 | UP   | 479.3562 | 479.3551 |
| 5749 | M669T26  | 1.651106 | 0.723433 | 0.853682 | 0.419379 | 0.468463 | UP   | 669.1623 | 669.1618 |
| 5750 | M675T22  | 1.468212 | 0.55406  | 0.872804 | 0.419474 | 0.468494 | UP   | 674.5061 | 674.5048 |
| 5751 | M228T10_ | 1.548172 | 0.630566 | 0.85195  | 0.419569 | 0.468524 | UP   | 228.1596 | 228.1589 |
| 5752 | M394T26_ | 2.017791 | -1.01278 | -0.88116 | 0.419575 | 0.468526 | DOWN | 394.1782 | 394.1776 |
| 5753 | M209T22  | 1.6335   | -0.70797 | -0.88933 | 0.419576 | 0.468526 | DOWN | 209.1538 | 209.1533 |
| 5754 | M529T43  | 1.446698 | 0.532764 | 0.862274 | 0.419622 | 0.468541 | UP   | 529.3159 | 529.3147 |
| 5755 | M400T15  | 1.74184  | 0.800612 | 0.851082 | 0.419624 | 0.468542 | UP   | 400.0629 | 400.0627 |
| 5756 | M369T9_1 | 2.462985 | 1.300408 | 0.87464  | 0.419804 | 0.468599 | UP   | 369.2922 | 369.2919 |
| 5757 | M616T43  | 1.169608 | 0.226025 | 0.860478 | 0.419947 | 0.468645 | UP   | 615.9424 | 615.9418 |
| 5758 | M596T33_ | 1.695423 | 0.761645 | 0.863066 | 0.419963 | 0.46865  | UP   | 596.4249 | 596.424  |
| 5759 | M309T10_ | 1.505494 | 0.590237 | 0.850603 | 0.420042 | 0.468675 | UP   | 309.2174 | 309.2165 |
| 5760 | M413T24  | 1.813268 | 0.858593 | 0.879968 | 0.420125 | 0.468701 | UP   | 413.126  | 413.1259 |
| 5761 | M267T18_ | 1.476601 | 0.56228  | 0.851233 | 0.420138 | 0.468706 | UP   | 267.2512 | 267.2509 |
| 5762 | M377T10_ | 2.564334 | 1.358584 | 0.861121 | 0.420175 | 0.468717 | UP   | 377.3489 | 377.3485 |
| 5763 | M371T30_ | 3.661693 | -1.87251 | -0.89632 | 0.420264 | 0.468746 | DOWN | 371.1306 | 371.1305 |
| 5764 | M334T10_ | 1.949281 | 0.962942 | 0.849444 | 0.420349 | 0.468773 | UP   | 334.1723 | 334.1712 |
| 5765 | M246T22  | 1.667234 | 0.737456 | 0.849631 | 0.420489 | 0.468817 | UP   | 246.0552 | 246.0548 |
| 5766 | M587T29_ | 2.728819 | -1.44828 | -0.88894 | 0.420527 | 0.46883  | DOWN | 587.2963 | 587.2957 |
| 5767 | M384T12  | 1.713278 | 0.776759 | 0.849019 | 0.420718 | 0.46889  | UP   | 384.3225 | 384.3218 |
| 5768 | M668T11  | 1.72164  | 0.783783 | 0.854017 | 0.420869 | 0.468939 | UP   | 668.4971 | 668.4967 |
| 5769 | M441T33_ | 1.474533 | -0.56026 | -0.84862 | 0.420972 | 0.468972 | DOWN | 441.1845 | 441.1837 |
| 5770 | M857T11_ | 2.325455 | 1.217513 | 0.854926 | 0.421333 | 0.469086 | UP   | 857.3628 | 857.3618 |
| 5771 | M204T29  | 1.967225 | 0.976162 | 0.849812 | 0.421359 | 0.469095 | UP   | 204.0318 | 204.0317 |
| 5772 | M531T20  | 1.946851 | 0.961142 | 0.850219 | 0.421414 | 0.469112 | UP   | 530.934  | 530.9335 |
| 5773 | M240T20_ | 1.409697 | 0.495385 | 0.848728 | 0.421488 | 0.469135 | UP   | 240.2323 | 240.2318 |
| 5774 | M301T24  | 1.557945 | -0.63964 | -0.86176 | 0.421494 | 0.469138 | DOWN | 301.1591 | 301.1587 |
| 5775 | M285T16_ | 1.646311 | 0.719237 | 0.848211 | 0.421626 | 0.469179 | UP   | 285.0636 | 285.0633 |
| 5776 | M586T31  | 2.338854 | 1.225802 | 0.884155 | 0.421759 | 0.469222 | UP   | 586.236  | 586.2349 |
| 5777 | M421T10  | 1.784237 | 0.835307 | 0.847583 | 0.42192  | 0.469273 | UP   | 420.7305 | 420.7296 |
| 5778 | M637T43_ | 1.11263  | 0.153974 | 0.847924 | 0.421922 | 0.469273 | UP   | 636.9529 | 636.9516 |
| 5779 | M329T22_ | 1.879683 | 0.910489 | 0.846896 | 0.421953 | 0.469283 | UP   | 328.9159 | 328.9052 |
| 5780 | M861T21  | 1.694459 | 0.760825 | 0.857584 | 0.42205  | 0.469314 | UP   | 860.5733 | 860.5729 |

|      |          |          |          |          |          |          |      |          |          |
|------|----------|----------|----------|----------|----------|----------|------|----------|----------|
| 5781 | M395T23_ | 1.624126 | 0.699664 | 0.865697 | 0.422078 | 0.469323 | UP   | 394.5376 | 394.5374 |
| 5782 | M568T41  | 1.326851 | -0.40801 | -0.86066 | 0.422132 | 0.46934  | DOWN | 568.4572 | 568.4561 |
| 5783 | M683T29_ | 1.882974 | 0.913013 | 0.846227 | 0.422331 | 0.469403 | UP   | 683.2258 | 683.225  |
| 5784 | M408T22  | 1.813713 | -0.85895 | -0.8799  | 0.422489 | 0.469453 | DOWN | 408.0087 | 408.0076 |
| 5785 | M429T10_ | 3.255549 | 1.702901 | 0.888872 | 0.422575 | 0.46948  | UP   | 429.2601 | 429.2592 |
| 5786 | M499T9_3 | 2.072062 | 1.051067 | 0.862839 | 0.42263  | 0.469498 | UP   | 499.3053 | 499.3    |
| 5787 | M391T22_ | 1.82636  | 0.868971 | 0.847205 | 0.422641 | 0.469501 | UP   | 390.9779 | 390.9775 |
| 5788 | M337T17_ | 1.868188 | 0.90164  | 0.846205 | 0.422939 | 0.469596 | UP   | 337.2032 | 337.2027 |
| 5789 | M249T15  | 1.632867 | 0.707407 | 0.844667 | 0.423046 | 0.469629 | UP   | 249.2062 | 249.2057 |
| 5790 | M216T10_ | 1.432723 | 0.51876  | 0.848224 | 0.423095 | 0.469645 | UP   | 216.1597 | 216.1591 |
| 5791 | M574T23  | 1.872761 | 0.905167 | 0.84881  | 0.423098 | 0.469646 | UP   | 573.9524 | 573.9512 |
| 5792 | M345T18  | 1.796289 | 0.845019 | 0.844069 | 0.423156 | 0.469664 | UP   | 344.9724 | 344.9719 |
| 5793 | M410T22_ | 1.847216 | -0.88535 | -0.8769  | 0.423196 | 0.469677 | DOWN | 410.0056 | 410.0038 |
| 5794 | M373T21_ | 1.794126 | 0.843282 | 0.849236 | 0.423698 | 0.469843 | UP   | 373.2698 | 373.269  |
| 5795 | M923T21  | 1.921551 | 0.942272 | 0.85094  | 0.423714 | 0.469849 | UP   | 922.6326 | 922.6315 |
| 5796 | M501T11  | 2.131375 | 1.091784 | 0.843849 | 0.423757 | 0.469863 | UP   | 500.8999 | 500.8994 |
| 5797 | M510T32_ | 1.56579  | -0.64689 | -0.85298 | 0.424014 | 0.469948 | DOWN | 510.3553 | 510.3544 |
| 5798 | M635T18  | 1.82871  | 0.870827 | 0.843696 | 0.424048 | 0.46996  | UP   | 635.1981 | 635.1976 |
| 5799 | M613T31  | 1.40999  | -0.49569 | -0.84363 | 0.424181 | 0.470004 | DOWN | 613.2549 | 613.2537 |
| 5800 | M338T34_ | 1.675234 | 0.744362 | 0.873479 | 0.424276 | 0.470035 | UP   | 338.2328 | 338.2328 |
| 5801 | M376T13_ | 2.723193 | 1.445299 | 0.866768 | 0.424332 | 0.470054 | UP   | 376.1244 | 376.1243 |
| 5802 | M246T13  | 1.935102 | 0.95241  | 0.841781 | 0.42453  | 0.47012  | UP   | 246.0215 | 246.021  |
| 5803 | M1740T10 | 2.737656 | 1.452941 | 0.856325 | 0.424561 | 0.47013  | UP   | 1740.3   | 1740.299 |
| 5804 | M389T29  | 1.654266 | 0.726191 | 0.852834 | 0.424658 | 0.470162 | UP   | 389.1286 | 389.1283 |
| 5805 | M407T19  | 1.57533  | 0.655654 | 0.853925 | 0.424736 | 0.470188 | UP   | 407.2905 | 407.2901 |
| 5806 | M273T17  | 1.745123 | -0.80333 | -0.87257 | 0.424901 | 0.470242 | DOWN | 273.1892 | 273.1886 |
| 5807 | M332T10_ | 2.267037 | 1.180808 | 0.852969 | 0.424912 | 0.470246 | UP   | 332.4541 | 332.4535 |
| 5808 | M269T15  | 1.561913 | 0.643314 | 0.844163 | 0.425045 | 0.47029  | UP   | 269.1902 | 269.1896 |
| 5809 | M371T21_ | 2.030055 | 1.021518 | 0.869835 | 0.42525  | 0.470358 | UP   | 371.1835 | 371.1825 |
| 5810 | M379T18  | 1.537211 | 0.620315 | 0.856391 | 0.425335 | 0.470386 | UP   | 379.1297 | 379.1294 |
| 5811 | M189T11  | 2.066381 | 1.047106 | 0.839912 | 0.425448 | 0.470423 | UP   | 189.0211 | 189.0207 |
| 5812 | M301T35  | 2.306012 | 1.2054   | 0.864854 | 0.425484 | 0.470436 | UP   | 301.2739 | 301.2738 |
| 5813 | M387T29_ | 1.937974 | 0.954549 | 0.851322 | 0.425571 | 0.470464 | UP   | 387.019  | 387.0189 |
| 5814 | M539T27  | 1.476748 | 0.562423 | 0.846105 | 0.425575 | 0.470466 | UP   | 538.6773 | 538.6765 |
| 5815 | M376T28_ | 1.635564 | 0.709788 | 0.84017  | 0.425583 | 0.470468 | UP   | 376.3001 | 376.2995 |
| 5816 | M658T9_3 | 1.806334 | 0.853065 | 0.839332 | 0.425653 | 0.470491 | UP   | 658.3714 | 658.3677 |
| 5817 | M413T31_ | 1.436543 | 0.522602 | 0.843931 | 0.425712 | 0.470511 | UP   | 413.3091 | 413.3081 |
| 5818 | M881T29  | 1.824804 | 0.867741 | 0.842619 | 0.426049 | 0.470622 | UP   | 880.6219 | 880.6209 |
| 5819 | M383T36  | 2.739447 | -1.45388 | -0.87926 | 0.426072 | 0.470629 | DOWN | 383.1409 | 383.1405 |
| 5820 | M567T26  | 2.283294 | -1.19112 | -0.87077 | 0.42626  | 0.470691 | DOWN | 567.2258 | 567.2254 |
| 5821 | M499T21  | 1.864819 | 0.899035 | 0.838796 | 0.426503 | 0.470771 | UP   | 499.0502 | 499.0501 |
| 5822 | M482T9_3 | 2.210463 | 1.144349 | 0.849529 | 0.426555 | 0.470789 | UP   | 482.3007 | 482.2998 |
| 5823 | M685T23  | 2.260683 | -1.17676 | -0.87558 | 0.426606 | 0.470805 | DOWN | 685.3498 | 685.3494 |
| 5824 | M453T28  | 1.944187 | -0.95917 | -0.85443 | 0.42667  | 0.470826 | DOWN | 453.3257 | 453.3253 |
| 5825 | M289T24  | 1.801323 | 0.849057 | 0.847499 | 0.426747 | 0.470852 | UP   | 289.2568 | 289.2563 |
| 5826 | M333T10_ | 2.220867 | 1.151123 | 0.849186 | 0.426856 | 0.470888 | UP   | 332.9223 | 332.9217 |
| 5827 | M771T12  | 1.72342  | 0.785274 | 0.84283  | 0.426933 | 0.470913 | UP   | 770.5613 | 770.5606 |

|      |          |          |          |          |          |          |      |          |          |
|------|----------|----------|----------|----------|----------|----------|------|----------|----------|
| 5828 | M581T28  | 1.851087 | 0.888373 | 0.843888 | 0.427034 | 0.470946 | UP   | 581.2161 | 581.2153 |
| 5829 | M557T9   | 2.225146 | 1.1539   | 0.864869 | 0.42715  | 0.470984 | UP   | 557.2644 | 557.263  |
| 5830 | M535T20  | 1.950047 | 0.963509 | 0.837385 | 0.427158 | 0.470987 | UP   | 534.9654 | 534.9649 |
| 5831 | M220T10_ | 2.264991 | 1.179505 | 0.838569 | 0.427176 | 0.470993 | UP   | 219.9483 | 219.9483 |
| 5832 | M247T9   | 1.692824 | -0.75943 | -0.83718 | 0.42733  | 0.471043 | DOWN | 246.6505 | 246.6498 |
| 5833 | M242T21_ | 1.775302 | -0.82806 | -0.85814 | 0.42737  | 0.471057 | DOWN | 242.2117 | 242.2111 |
| 5834 | M389T11_ | 1.873115 | 0.905439 | 0.84348  | 0.427612 | 0.471154 | UP   | 389.1993 | 389.199  |
| 5835 | M612T32  | 2.103774 | 1.07298  | 0.867851 | 0.427699 | 0.47119  | UP   | 612.2522 | 612.2515 |
| 5836 | M511T20_ | 1.732164 | -0.79258 | -0.85586 | 0.427952 | 0.471292 | DOWN | 511.3227 | 511.3217 |
| 5837 | M272T28  | 1.448298 | 0.534358 | 0.857266 | 0.428279 | 0.471424 | UP   | 272.2948 | 272.2944 |
| 5838 | M1143T11 | 1.911024 | 0.934346 | 0.836572 | 0.428325 | 0.471442 | UP   | 1142.563 | 1142.558 |
| 5839 | M375T18_ | 1.479025 | 0.564646 | 0.835469 | 0.428383 | 0.471466 | UP   | 375.3009 | 375.3001 |
| 5840 | M647T10  | 2.597733 | 1.377253 | 0.846894 | 0.428425 | 0.471483 | UP   | 647.1206 | 647.1203 |
| 5841 | M791T34  | 1.915215 | -0.93751 | -0.87782 | 0.428562 | 0.471538 | DOWN | 790.5534 | 790.5519 |
| 5842 | M411T17  | 1.653916 | -0.72589 | -0.85953 | 0.428657 | 0.471577 | DOWN | 411.3223 | 411.3214 |
| 5843 | M211T27_ | 1.555845 | -0.6377  | -0.84903 | 0.428742 | 0.471611 | DOWN | 211.1094 | 211.1091 |
| 5844 | M563T10  | 2.626704 | 1.393254 | 0.856274 | 0.428758 | 0.471617 | UP   | 562.6906 | 562.6901 |
| 5845 | M453T9_6 | 2.405222 | 1.26617  | 0.856889 | 0.428809 | 0.471638 | UP   | 453.2578 | 453.2534 |
| 5846 | M416T26_ | 1.804148 | 0.851318 | 0.850158 | 0.429089 | 0.471751 | UP   | 416.0303 | 416.0296 |
| 5847 | M541T10  | 1.71809  | 0.780806 | 0.838764 | 0.429365 | 0.471861 | UP   | 541.4522 | 541.4514 |
| 5848 | M548T40  | 2.086981 | -1.06142 | -0.87472 | 0.429395 | 0.471874 | DOWN | 548.3004 | 548.2985 |
| 5849 | M627T11  | 1.692508 | 0.759163 | 0.832248 | 0.429586 | 0.471951 | UP   | 627.4339 | 627.4325 |
| 5850 | M858T31  | 1.919751 | 0.940919 | 0.846535 | 0.429635 | 0.47197  | UP   | 858.1156 | 858.1151 |
| 5851 | M247T13  | 1.770386 | 0.824064 | 0.8396   | 0.429646 | 0.471974 | UP   | 247.0247 | 247.0245 |
| 5852 | M403T18  | 1.443089 | 0.52916  | 0.845822 | 0.429752 | 0.472017 | UP   | 403.0017 | 403.0006 |
| 5853 | M858T11  | 2.405088 | 1.266089 | 0.83859  | 0.429976 | 0.472107 | UP   | 858.3669 | 858.364  |
| 5854 | M767T41  | 1.563575 | -0.64485 | -0.83827 | 0.430273 | 0.472226 | DOWN | 767.4616 | 767.4602 |
| 5855 | M431T18  | 1.638571 | 0.712438 | 0.832621 | 0.430389 | 0.472273 | UP   | 431.0213 | 431.0207 |
| 5856 | M698T9_1 | 2.074627 | 1.052852 | 0.859759 | 0.430443 | 0.472295 | UP   | 697.5225 | 697.5122 |
| 5857 | M451T30_ | 1.128192 | 0.174012 | 0.850866 | 0.430461 | 0.472302 | UP   | 451.3139 | 451.3132 |
| 5858 | M376T10_ | 3.160363 | 1.66009  | 0.85577  | 0.430595 | 0.472356 | UP   | 376.417  | 376.4168 |
| 5859 | M744T24  | 1.731215 | 0.791785 | 0.830522 | 0.430635 | 0.472372 | UP   | 744.4539 | 744.453  |
| 5860 | M360T29_ | 1.511453 | 0.595936 | 0.830579 | 0.430771 | 0.472426 | UP   | 360.1807 | 360.1801 |
| 5861 | M343T10  | 1.619364 | 0.695427 | 0.830314 | 0.430912 | 0.472483 | UP   | 343.3076 | 343.3064 |
| 5862 | M632T10_ | 2.675145 | 1.419617 | 0.844495 | 0.430991 | 0.472514 | UP   | 631.8032 | 631.8026 |
| 5863 | M389T10_ | 1.62405  | 0.699596 | 0.848341 | 0.431    | 0.472518 | UP   | 389.2552 | 389.2541 |
| 5864 | M768T41  | 2.77676  | 1.473402 | 0.861898 | 0.431238 | 0.472613 | UP   | 768.2292 | 768.2288 |
| 5865 | M611T11_ | 2.421646 | 1.275988 | 0.835201 | 0.431248 | 0.472617 | UP   | 611.2925 | 611.2912 |
| 5866 | M357T22_ | 1.785066 | 0.835977 | 0.829129 | 0.431341 | 0.472654 | UP   | 356.9929 | 356.9921 |
| 5867 | M380T44_ | 1.593914 | -0.67257 | -0.83478 | 0.431671 | 0.472786 | DOWN | 380.2094 | 380.2091 |
| 5868 | M672T29_ | 1.976015 | 0.982594 | 0.829582 | 0.431683 | 0.472791 | UP   | 671.7271 | 671.7264 |
| 5869 | M485T43  | 1.673133 | 0.742552 | 0.858832 | 0.432037 | 0.472932 | UP   | 485.326  | 485.3256 |
| 5870 | M793T29_ | 1.629523 | 0.70445  | 0.827182 | 0.432135 | 0.472972 | UP   | 792.5689 | 792.5678 |
| 5871 | M257T35  | 1.909009 | 0.932824 | 0.850854 | 0.432499 | 0.473117 | UP   | 257.2475 | 257.2475 |
| 5872 | M485T17_ | 1.552852 | 0.63492  | 0.827267 | 0.432524 | 0.473127 | UP   | 485.3933 | 485.3929 |
| 5873 | M528T28  | 1.821274 | -0.86495 | -0.85425 | 0.43256  | 0.473141 | DOWN | 528.2723 | 528.2712 |
| 5874 | M573T30  | 1.671749 | -0.74136 | -0.83828 | 0.432605 | 0.473159 | DOWN | 573.3643 | 573.3637 |

|      |          |          |          |          |          |          |      |          |          |
|------|----------|----------|----------|----------|----------|----------|------|----------|----------|
| 5875 | M239T18_ | 1.373608 | -0.45797 | -0.8279  | 0.432632 | 0.47317  | DOWN | 239.0717 | 239.071  |
| 5876 | M745T21  | 1.681543 | 0.749785 | 0.833845 | 0.432752 | 0.473218 | UP   | 744.5299 | 744.5278 |
| 5877 | M417T20  | 1.897645 | 0.92421  | 0.826123 | 0.433005 | 0.473318 | UP   | 417.0299 | 417.0298 |
| 5878 | M297T35  | 2.952944 | -1.56215 | -0.86805 | 0.433223 | 0.473405 | DOWN | 297.2399 | 297.239  |
| 5879 | M1117T11 | 1.961391 | 0.971877 | 0.826036 | 0.433341 | 0.473452 | UP   | 1116.605 | 1116.604 |
| 5880 | M606T21  | 1.735249 | 0.795143 | 0.853513 | 0.433431 | 0.473488 | UP   | 606.262  | 606.2612 |
| 5881 | M791T26  | 1.513444 | 0.597835 | 0.836035 | 0.433444 | 0.473493 | UP   | 790.5902 | 790.5887 |
| 5882 | M199T21  | 1.340098 | 0.422338 | 0.825631 | 0.433454 | 0.473497 | UP   | 199.1695 | 199.169  |
| 5883 | M460T23_ | 1.404236 | -0.48979 | -0.83995 | 0.433503 | 0.473516 | DOWN | 460.2694 | 460.2684 |
| 5884 | M706T27  | 1.411494 | 0.497223 | 0.85786  | 0.433573 | 0.473544 | UP   | 706.3291 | 706.328  |
| 5885 | M298T16_ | 1.506439 | 0.591142 | 0.828637 | 0.433651 | 0.473575 | UP   | 298.1886 | 298.1885 |
| 5886 | M159T2   | 1.679643 | 0.748155 | 0.866493 | 0.433657 | 0.473578 | UP   | 158.9611 | 158.9609 |
| 5887 | M369T10_ | 1.955521 | 0.967553 | 0.823578 | 0.434529 | 0.473924 | UP   | 369.2175 | 369.2168 |
| 5888 | M505T44_ | 1.111264 | 0.152201 | 0.830243 | 0.434564 | 0.473937 | UP   | 505.3752 | 505.3744 |
| 5889 | M319T31_ | 1.653055 | -0.72513 | -0.8484  | 0.43459  | 0.473948 | DOWN | 319.113  | 319.1127 |
| 5890 | M876T32  | 2.129713 | 1.090659 | 0.823046 | 0.434665 | 0.473977 | UP   | 876.379  | 876.3781 |
| 5891 | M404T10_ | 1.678638 | 0.747291 | 0.822652 | 0.434724 | 0.474001 | UP   | 404.2726 | 404.2704 |
| 5892 | M377T20_ | 2.450278 | -1.29295 | -0.85883 | 0.434943 | 0.474088 | DOWN | 377.1164 | 377.1161 |
| 5893 | M764T31_ | 1.957795 | 0.96923  | 0.821715 | 0.435057 | 0.474133 | UP   | 764.1779 | 764.1774 |
| 5894 | M480T11  | 1.455356 | 0.541372 | 0.835658 | 0.435117 | 0.474156 | UP   | 480.1448 | 480.1431 |
| 5895 | M824T31  | 1.362318 | 0.446064 | 0.830614 | 0.43514  | 0.474166 | UP   | 823.6052 | 823.6039 |
| 5896 | M367T10_ | 1.964318 | 0.974028 | 0.822918 | 0.435201 | 0.47419  | UP   | 367.2195 | 367.2187 |
| 5897 | M255T19_ | 2.014483 | 1.01041  | 0.827279 | 0.435227 | 0.4742   | UP   | 255.1594 | 255.1588 |
| 5898 | M454T9_4 | 3.178484 | 1.668339 | 0.846537 | 0.435292 | 0.474225 | UP   | 453.8915 | 453.8906 |
| 5899 | M550T44_ | 1.114597 | 0.156522 | 0.822981 | 0.435292 | 0.474226 | UP   | 549.9031 | 549.9023 |
| 5900 | M763T10_ | 1.761129 | 0.816501 | 0.852667 | 0.436086 | 0.474539 | UP   | 763.4663 | 763.4642 |
| 5901 | M553T9   | 2.410492 | 1.269328 | 0.842688 | 0.436304 | 0.474625 | UP   | 553.2684 | 553.267  |
| 5902 | M340T15_ | 1.691444 | 0.758256 | 0.819324 | 0.436404 | 0.474665 | UP   | 340.1563 | 340.1557 |
| 5903 | M589T11_ | 2.880976 | 1.526558 | 0.843848 | 0.436511 | 0.474707 | UP   | 589.2488 | 589.2471 |
| 5904 | M376T18  | 1.460353 | 0.546317 | 0.820049 | 0.436749 | 0.474801 | UP   | 376.3043 | 376.3038 |
| 5905 | M555T10  | 1.996085 | 0.997173 | 0.821452 | 0.436751 | 0.474801 | UP   | 555.3547 | 555.3536 |
| 5906 | M417T22_ | 1.859586 | 0.894982 | 0.822839 | 0.436834 | 0.474834 | UP   | 417.0501 | 417.0494 |
| 5907 | M443T12  | 1.728322 | 0.789372 | 0.819697 | 0.436968 | 0.474887 | UP   | 443.3273 | 443.3271 |
| 5908 | M388T27  | 1.608674 | 0.685872 | 0.81828  | 0.437068 | 0.474926 | UP   | 388.129  | 388.1285 |
| 5909 | M220T10_ | 2.294435 | 1.198139 | 0.820709 | 0.437126 | 0.474949 | UP   | 219.7641 | 219.7639 |
| 5910 | M187T27  | 1.325546 | -0.40659 | -0.81766 | 0.437234 | 0.474991 | DOWN | 187.1117 | 187.1117 |
| 5911 | M210T10_ | 1.710166 | 0.774136 | 0.817429 | 0.437354 | 0.475038 | UP   | 210.2048 | 210.2042 |
| 5912 | M295T19  | 1.62325  | 0.698885 | 0.817502 | 0.437394 | 0.475054 | UP   | 295.1107 | 295.1099 |
| 5913 | M223T30_ | 1.845932 | -0.88435 | -0.84577 | 0.437518 | 0.475103 | DOWN | 223.0966 | 223.0962 |
| 5914 | M462T21_ | 1.401699 | -0.48718 | -0.8182  | 0.437523 | 0.475105 | DOWN | 462.1805 | 462.1803 |
| 5915 | M508T9   | 2.20698  | 1.142073 | 0.831061 | 0.437644 | 0.475152 | UP   | 508.2665 | 508.2648 |
| 5916 | M568T33  | 3.168269 | -1.66369 | -0.85653 | 0.437751 | 0.475195 | DOWN | 568.39   | 568.3896 |
| 5917 | M704T9_1 | 2.225756 | 1.154296 | 0.826118 | 0.438423 | 0.475458 | UP   | 703.5519 | 703.5506 |
| 5918 | M333T9_2 | 2.499731 | 1.321773 | 0.847625 | 0.438486 | 0.475483 | UP   | 332.8714 | 332.8708 |
| 5919 | M364T11_ | 1.510263 | 0.594799 | 0.815223 | 0.438837 | 0.47562  | UP   | 364.2207 | 364.2193 |
| 5920 | M449T22_ | 1.748514 | -0.80613 | -0.84632 | 0.439031 | 0.475696 | DOWN | 449.0354 | 449.0341 |
| 5921 | M713T35  | 1.84364  | 0.882557 | 0.823121 | 0.439104 | 0.475724 | UP   | 713.482  | 713.4816 |

|      |          |          |          |          |          |          |      |          |          |
|------|----------|----------|----------|----------|----------|----------|------|----------|----------|
| 5922 | M324T30  | 1.528649 | -0.61226 | -0.82787 | 0.439218 | 0.475769 | DOWN | 324.2167 | 324.2166 |
| 5923 | M438T32  | 1.527676 | 0.611339 | 0.814324 | 0.43927  | 0.47579  | UP   | 438.3427 | 438.3418 |
| 5924 | M309T11_ | 1.57679  | 0.65699  | 0.816304 | 0.439408 | 0.475843 | UP   | 309.1855 | 309.1847 |
| 5925 | M649T34_ | 2.61974  | 1.389424 | 0.847426 | 0.43954  | 0.475895 | UP   | 649.2699 | 649.2687 |
| 5926 | M336T20  | 2.465408 | -1.30183 | -0.84909 | 0.439661 | 0.475942 | DOWN | 336.0898 | 336.0895 |
| 5927 | M759T43  | 1.374886 | 0.459312 | 0.814317 | 0.439938 | 0.47605  | UP   | 758.5633 | 758.5627 |
| 5928 | M300T26_ | 1.956718 | -0.96844 | -0.84538 | 0.440119 | 0.476121 | DOWN | 300.2042 | 300.2039 |
| 5929 | M349T9_4 | 1.929772 | 0.94843  | 0.842941 | 0.440383 | 0.476224 | UP   | 349.2741 | 349.274  |
| 5930 | M363T11_ | 1.50944  | 0.594014 | 0.811958 | 0.440648 | 0.476327 | UP   | 363.2172 | 363.2159 |
| 5931 | M195T21  | 1.474328 | 0.560058 | 0.811788 | 0.440792 | 0.476383 | UP   | 195.1017 | 195.1013 |
| 5932 | M458T21_ | 1.793019 | 0.842391 | 0.811066 | 0.441118 | 0.47651  | UP   | 458.0565 | 458.0557 |
| 5933 | M253T13_ | 1.558051 | 0.639742 | 0.81066  | 0.441448 | 0.476638 | UP   | 253.247  | 253.2465 |
| 5934 | M187T2_1 | 2.198477 | 1.136504 | 0.838786 | 0.441593 | 0.476694 | UP   | 186.956  | 186.9558 |
| 5935 | M227T15_ | 1.644317 | 0.717489 | 0.835465 | 0.441636 | 0.476711 | UP   | 227.0956 | 227.0955 |
| 5936 | M571T30_ | 1.483032 | -0.56855 | -0.82986 | 0.441742 | 0.476752 | DOWN | 570.5034 | 570.5026 |
| 5937 | M695T43  | 1.568285 | 0.649187 | 0.809429 | 0.4418   | 0.476775 | UP   | 695.023  | 695.0225 |
| 5938 | M849T28  | 1.525131 | 0.608933 | 0.812478 | 0.44187  | 0.476802 | UP   | 848.6323 | 848.6308 |
| 5939 | M327T13_ | 1.787251 | 0.837742 | 0.819714 | 0.4422   | 0.47693  | UP   | 326.9389 | 326.9387 |
| 5940 | M323T29  | 1.64317  | 0.716482 | 0.818421 | 0.442335 | 0.476982 | UP   | 323.1419 | 323.1417 |
| 5941 | M775T37  | 1.483263 | 0.568774 | 0.807956 | 0.442636 | 0.477098 | UP   | 774.5582 | 774.5574 |
| 5942 | M524T20  | 1.55787  | 0.639575 | 0.808269 | 0.442694 | 0.477121 | UP   | 524.4212 | 524.4202 |
| 5943 | M444T13  | 2.468121 | 1.303413 | 0.815307 | 0.442727 | 0.477134 | UP   | 444.0406 | 444.0403 |
| 5944 | M427T16_ | 3.704977 | -1.88946 | -0.84651 | 0.442757 | 0.477145 | DOWN | 426.9982 | 426.9979 |
| 5945 | M602T30  | 1.772442 | 0.825739 | 0.823077 | 0.442775 | 0.477152 | UP   | 602.4402 | 602.439  |
| 5946 | M575T32_ | 2.134929 | 1.094188 | 0.83918  | 0.44278  | 0.477154 | UP   | 574.9189 | 574.9176 |
| 5947 | M550T10  | 1.758057 | 0.813982 | 0.80811  | 0.442875 | 0.477191 | UP   | 550.4045 | 550.4035 |
| 5948 | M661T18  | 1.851089 | 0.888374 | 0.807292 | 0.442925 | 0.47721  | UP   | 660.9431 | 660.942  |
| 5949 | M454T44  | 1.23686  | 0.306682 | 0.808624 | 0.443251 | 0.477336 | UP   | 454.2646 | 454.264  |
| 5950 | M551T9_2 | 2.446484 | 1.29071  | 0.83439  | 0.44338  | 0.477386 | UP   | 551.2725 | 551.2719 |
| 5951 | M385T27_ | 1.782364 | 0.833792 | 0.807159 | 0.443575 | 0.477461 | UP   | 384.5525 | 384.5517 |
| 5952 | M356T10  | 1.565045 | 0.646204 | 0.80921  | 0.443641 | 0.477487 | UP   | 356.2268 | 356.226  |
| 5953 | M461T31  | 1.615177 | 0.691692 | 0.809832 | 0.443654 | 0.477492 | UP   | 461.147  | 461.1466 |
| 5954 | M483T44_ | 1.147118 | 0.198014 | 0.805722 | 0.443847 | 0.477566 | UP   | 482.8604 | 482.8596 |
| 5955 | M493T18_ | 1.867578 | 0.901169 | 0.807118 | 0.444047 | 0.477644 | UP   | 493.2362 | 493.2359 |
| 5956 | M173T9_2 | 2.15007  | 1.104384 | 0.81586  | 0.444071 | 0.477653 | UP   | 172.7228 | 172.7168 |
| 5957 | M280T26_ | 1.946444 | -0.96084 | -0.83557 | 0.444093 | 0.477661 | DOWN | 280.2637 | 280.2633 |
| 5958 | M311T20  | 1.479835 | -0.56544 | -0.82741 | 0.44416  | 0.477687 | DOWN | 311.1857 | 311.185  |
| 5959 | M1115T11 | 1.929747 | 0.948412 | 0.807618 | 0.444207 | 0.477705 | UP   | 1115.103 | 1115.1   |
| 5960 | M416T21_ | 1.717001 | 0.77989  | 0.808304 | 0.444618 | 0.477864 | UP   | 416.139  | 416.1288 |
| 5961 | M525T30  | 1.440991 | -0.52706 | -0.81854 | 0.44462  | 0.477864 | DOWN | 525.4738 | 525.4729 |
| 5962 | M273T30_ | 1.638261 | 0.712165 | 0.80692  | 0.444688 | 0.47789  | UP   | 273.1851 | 273.1846 |
| 5963 | M697T41  | 1.423059 | -0.509   | -0.80585 | 0.444713 | 0.4779   | DOWN | 697.3562 | 697.3557 |
| 5964 | M407T37  | 1.580487 | -0.66037 | -0.82806 | 0.444747 | 0.477913 | DOWN | 407.2794 | 407.2785 |
| 5965 | M339T9_1 | 1.629105 | 0.70408  | 0.808607 | 0.444818 | 0.47794  | UP   | 338.7802 | 338.7801 |
| 5966 | M769T10_ | 1.986797 | 0.990444 | 0.807086 | 0.445252 | 0.478107 | UP   | 769.4096 | 769.4076 |
| 5967 | M278T18  | 1.97048  | 0.978547 | 0.81145  | 0.445522 | 0.478211 | UP   | 278.0595 | 278.0594 |
| 5968 | M554T28_ | 1.701055 | 0.76643  | 0.8023   | 0.445584 | 0.478235 | UP   | 554.2178 | 554.2171 |

|      |          |          |          |          |          |          |      |          |          |
|------|----------|----------|----------|----------|----------|----------|------|----------|----------|
| 5969 | M340T35_ | 1.415916 | 0.501736 | 0.802733 | 0.445707 | 0.478282 | UP   | 340.2849 | 340.2848 |
| 5970 | M540T36  | 1.277848 | 0.353716 | 0.802173 | 0.445719 | 0.478287 | UP   | 540.4259 | 540.4249 |
| 5971 | M341T26  | 1.535727 | 0.618921 | 0.809391 | 0.445764 | 0.478304 | UP   | 341.1527 | 341.1523 |
| 5972 | M614T30  | 1.895618 | -0.92267 | -0.82179 | 0.445818 | 0.478325 | DOWN | 614.2809 | 614.2795 |
| 5973 | M459T43  | 1.527169 | 0.61086  | 0.818186 | 0.445869 | 0.478344 | UP   | 459.2741 | 459.2735 |
| 5974 | M310T35_ | 1.623439 | 0.699053 | 0.8174   | 0.446047 | 0.478412 | UP   | 310.1465 | 310.1463 |
| 5975 | M363T40  | 1.544354 | 0.627003 | 0.801882 | 0.446292 | 0.478506 | UP   | 363.3106 | 363.31   |
| 5976 | M414T30_ | 1.3587   | -0.44223 | -0.80091 | 0.446371 | 0.478536 | DOWN | 414.3006 | 414.3002 |
| 5977 | M1044T32 | 3.731298 | -1.89968 | -0.8349  | 0.446464 | 0.478572 | DOWN | 1043.706 | 1043.704 |
| 5978 | M377T10_ | 2.669638 | 1.416644 | 0.815336 | 0.446494 | 0.478583 | UP   | 376.5211 | 376.5209 |
| 5979 | M562T24  | 1.914046 | 0.936626 | 0.809852 | 0.446548 | 0.478604 | UP   | 562.1189 | 562.1186 |
| 5980 | M311T37_ | 1.618983 | -0.69509 | -0.83544 | 0.446841 | 0.478716 | DOWN | 311.2945 | 311.2943 |
| 5981 | M493T24_ | 1.570484 | 0.651209 | 0.806146 | 0.446841 | 0.478716 | UP   | 493.1841 | 493.1838 |
| 5982 | M819T37  | 1.482057 | 0.567601 | 0.800103 | 0.446915 | 0.478745 | UP   | 818.5843 | 818.5837 |
| 5983 | M295T33  | 2.075376 | -1.05337 | -0.83212 | 0.446987 | 0.478772 | DOWN | 295.1881 | 295.1872 |
| 5984 | M359T9_1 | 2.891132 | 1.531634 | 0.824461 | 0.447085 | 0.478809 | UP   | 358.5731 | 358.5728 |
| 5985 | M608T44_ | 1.244437 | 0.315494 | 0.813003 | 0.447225 | 0.478863 | UP   | 608.4737 | 608.4726 |
| 5986 | M426T24_ | 1.856625 | 0.892682 | 0.802145 | 0.447268 | 0.478879 | UP   | 426.1366 | 426.1364 |
| 5987 | M392T19_ | 1.45333  | 0.539363 | 0.801597 | 0.44738  | 0.478922 | UP   | 391.5071 | 391.5063 |
| 5988 | M942T30  | 2.086121 | 1.060823 | 0.840146 | 0.447603 | 0.479007 | UP   | 941.6691 | 941.6674 |
| 5989 | M222T26_ | 1.520382 | 0.604433 | 0.798522 | 0.447876 | 0.479111 | UP   | 222.1207 | 222.1202 |
| 5990 | M471T21_ | 2.527598 | 1.337767 | 0.830213 | 0.447958 | 0.479143 | UP   | 471.2073 | 471.2063 |
| 5991 | M444T16  | 1.766122 | 0.820585 | 0.798337 | 0.447972 | 0.479148 | UP   | 444.1472 | 444.147  |
| 5992 | M455T10_ | 2.136854 | 1.095489 | 0.802881 | 0.448019 | 0.479166 | UP   | 455.184  | 455.1829 |
| 5993 | M276T28  | 1.602523 | 0.680345 | 0.800658 | 0.448128 | 0.479207 | UP   | 275.6258 | 275.6257 |
| 5994 | M643T20  | 3.097072 | -1.63091 | -0.83206 | 0.44822  | 0.479243 | DOWN | 643.2941 | 643.2934 |
| 5995 | M365T29_ | 2.089612 | -1.06324 | -0.82634 | 0.448235 | 0.479248 | DOWN | 365.1361 | 365.1355 |
| 5996 | M433T12  | 1.579418 | 0.659393 | 0.796959 | 0.448794 | 0.479461 | UP   | 433.2055 | 433.2053 |
| 5997 | M653T9_5 | 1.783539 | 0.834743 | 0.812489 | 0.44896  | 0.479524 | UP   | 653.4152 | 653.4135 |
| 5998 | M341T32_ | 1.472622 | 0.558387 | 0.826503 | 0.449109 | 0.479581 | UP   | 341.1535 | 341.1533 |
| 5999 | M358T18_ | 1.5893   | 0.668392 | 0.796033 | 0.449141 | 0.479593 | UP   | 358.0041 | 358.0037 |
| 6000 | M245T22_ | 1.609481 | 0.686596 | 0.796511 | 0.449242 | 0.479631 | UP   | 245.0472 | 245.0469 |
| 6001 | M259T18  | 1.700022 | 0.765554 | 0.795459 | 0.449363 | 0.479677 | UP   | 259.0995 | 259.099  |
| 6002 | M381T32  | 2.163893 | -1.11363 | -0.82642 | 0.449406 | 0.479693 | DOWN | 381.2982 | 381.298  |
| 6003 | M814T22  | 2.485134 | -1.31332 | -0.82781 | 0.449582 | 0.47976  | DOWN | 814.3048 | 814.303  |
| 6004 | M288T13  | 1.651569 | -0.72384 | -0.8283  | 0.44984  | 0.479858 | DOWN | 287.909  | 287.9087 |
| 6005 | M623T10_ | 1.608493 | 0.685709 | 0.795077 | 0.449849 | 0.479861 | UP   | 623.45   | 623.4478 |
| 6006 | M613T30  | 1.973728 | -0.98092 | -0.81462 | 0.449915 | 0.479887 | DOWN | 613.2776 | 613.2766 |
| 6007 | M392T19_ | 1.517393 | 0.601594 | 0.795614 | 0.449918 | 0.479888 | UP   | 392.0518 | 392.0514 |
| 6008 | M327T17_ | 1.601338 | 0.679278 | 0.825391 | 0.449946 | 0.479898 | UP   | 327.0174 | 327.0173 |
| 6009 | M427T18_ | 1.703468 | 0.768475 | 0.794801 | 0.449961 | 0.479904 | UP   | 427.0257 | 427.0243 |
| 6010 | M419T21_ | 1.855538 | 0.891837 | 0.794344 | 0.449994 | 0.479917 | UP   | 419.03   | 419.0299 |
| 6011 | M600T23  | 3.243431 | -1.69752 | -0.83345 | 0.450062 | 0.479942 | DOWN | 600.3307 | 600.3303 |
| 6012 | M254T13_ | 1.544581 | -0.62722 | -0.7976  | 0.450113 | 0.479961 | DOWN | 254.0152 | 254.0152 |
| 6013 | M477T9_2 | 2.239101 | -1.16292 | -0.82462 | 0.450215 | 0.48     | DOWN | 477.3317 | 477.3304 |
| 6014 | M387T18  | 1.726684 | 0.788004 | 0.793945 | 0.450224 | 0.480004 | UP   | 387.0024 | 387.0021 |
| 6015 | M777T10  | 1.831656 | 0.873149 | 0.809709 | 0.450297 | 0.480031 | UP   | 777.4443 | 777.4436 |



|      |          |          |          |          |          |          |      |          |          |
|------|----------|----------|----------|----------|----------|----------|------|----------|----------|
| 6016 | M534T30_ | 1.17077  | -0.22746 | -0.805   | 0.450434 | 0.480083 | DOWN | 534.3906 | 534.39   |
| 6017 | M567T33  | 3.07683  | -1.62144 | -0.83052 | 0.450442 | 0.480086 | DOWN | 567.387  | 567.3859 |
| 6018 | M521T18_ | 2.026725 | 1.019151 | 0.802785 | 0.45045  | 0.480089 | UP   | 521.0963 | 521.096  |
| 6019 | M228T14_ | 1.755101 | 0.811554 | 0.794695 | 0.450547 | 0.480126 | UP   | 228.053  | 228.053  |
| 6020 | M305T30_ | 1.702052 | -0.76727 | -0.80684 | 0.450552 | 0.480128 | DOWN | 304.6547 | 304.6545 |
| 6021 | M556T28  | 1.755656 | 0.81201  | 0.795993 | 0.450647 | 0.480164 | UP   | 556.2125 | 556.2117 |
| 6022 | M937T34  | 1.605345 | 0.682883 | 0.79301  | 0.450651 | 0.480165 | UP   | 936.6478 | 936.6466 |
| 6023 | M562T23_ | 1.518663 | 0.602801 | 0.804653 | 0.451069 | 0.480323 | UP   | 562.3742 | 562.3732 |
| 6024 | M495T26  | 1.871653 | 0.904313 | 0.80861  | 0.451117 | 0.480341 | UP   | 494.9345 | 494.9343 |
| 6025 | M302T13  | 1.764204 | 0.819017 | 0.794986 | 0.451156 | 0.480356 | UP   | 301.997  | 301.9968 |
| 6026 | M533T23_ | 1.87559  | 0.907345 | 0.794034 | 0.451206 | 0.480375 | UP   | 532.9256 | 532.9249 |
| 6027 | M199T18_ | 1.690196 | -0.75719 | -0.81871 | 0.451701 | 0.480562 | DOWN | 199.0968 | 199.0962 |
| 6028 | M322T20  | 1.644811 | 0.717922 | 0.79104  | 0.451754 | 0.480582 | UP   | 322.2592 | 322.2588 |
| 6029 | M474T23_ | 1.650539 | 0.722938 | 0.793258 | 0.451906 | 0.480639 | UP   | 474.0273 | 474.0263 |
| 6030 | M281T31_ | 1.470878 | 0.556678 | 0.791115 | 0.451923 | 0.480645 | UP   | 280.5177 | 280.5173 |
| 6031 | M587T33  | 1.61926  | 0.695335 | 0.790238 | 0.45219  | 0.480746 | UP   | 586.9085 | 586.9084 |
| 6032 | M386T18  | 1.692734 | 0.759355 | 0.790563 | 0.452252 | 0.480769 | UP   | 385.9991 | 385.9979 |
| 6033 | M420T22_ | 1.831757 | 0.873228 | 0.793902 | 0.452296 | 0.480786 | UP   | 420.049  | 420.0487 |
| 6034 | M676T10_ | 1.712343 | 0.775972 | 0.789689 | 0.452524 | 0.480872 | UP   | 676.3839 | 676.3822 |
| 6035 | M420T40  | 1.234108 | 0.303469 | 0.78949  | 0.452596 | 0.480899 | UP   | 420.332  | 420.3313 |
| 6036 | M451T29  | 1.549547 | 0.631847 | 0.79204  | 0.452615 | 0.480906 | UP   | 451.0868 | 451.0864 |
| 6037 | M304T33_ | 1.476842 | 0.562516 | 0.788945 | 0.452889 | 0.481009 | UP   | 304.2485 | 304.2479 |
| 6038 | M454T9_5 | 2.637166 | -1.39899 | -0.82574 | 0.452889 | 0.481009 | DOWN | 454.1382 | 454.1292 |
| 6039 | M254T19_ | 1.612764 | 0.689536 | 0.78881  | 0.452965 | 0.481037 | UP   | 254.084  | 254.0839 |
| 6040 | M322T32  | 1.533157 | 0.616505 | 0.788718 | 0.453019 | 0.481058 | UP   | 322.2953 | 322.2948 |
| 6041 | M421T22  | 1.750102 | 0.807439 | 0.789971 | 0.45314  | 0.481103 | UP   | 421.3066 | 421.306  |
| 6042 | M266T18  | 1.444107 | 0.530178 | 0.789465 | 0.453417 | 0.481207 | UP   | 266.248  | 266.2475 |
| 6043 | M229T10_ | 1.983931 | 0.988362 | 0.787724 | 0.453676 | 0.481304 | UP   | 228.5974 | 228.5967 |
| 6044 | M364T40_ | 1.541229 | 0.624081 | 0.787652 | 0.453705 | 0.481315 | UP   | 364.306  | 364.3051 |
| 6045 | M582T24  | 1.9538   | -0.96628 | -0.80347 | 0.453792 | 0.481348 | DOWN | 582.4219 | 582.4213 |
| 6046 | M348T21_ | 1.423434 | 0.509376 | 0.789024 | 0.453915 | 0.481394 | UP   | 348.2174 | 348.2153 |
| 6047 | M712T10  | 1.443971 | -0.53004 | -0.79163 | 0.45415  | 0.481482 | DOWN | 711.969  | 711.9675 |
| 6048 | M205T22  | 1.669046 | 0.739024 | 0.787979 | 0.454244 | 0.481517 | UP   | 205.016  | 205.0158 |
| 6049 | M610T39  | 1.690052 | 0.757067 | 0.797766 | 0.45426  | 0.481523 | UP   | 609.9388 | 609.9383 |
| 6050 | M382T22_ | 1.620999 | 0.696884 | 0.786777 | 0.454449 | 0.481594 | UP   | 382.3167 | 382.3165 |
| 6051 | M378T38  | 2.063368 | 1.045001 | 0.805256 | 0.454574 | 0.481641 | UP   | 378.329  | 378.3213 |
| 6052 | M165T28  | 1.220069 | -0.28696 | -0.78569 | 0.45469  | 0.481684 | DOWN | 165.0545 | 165.0544 |
| 6053 | M402T34  | 1.474345 | 0.560074 | 0.795492 | 0.45479  | 0.481721 | UP   | 402.2902 | 402.2895 |
| 6054 | M559T30_ | 1.07887  | 0.109521 | 0.789034 | 0.45483  | 0.481736 | UP   | 559.3844 | 559.3833 |
| 6055 | M546T20  | 1.588158 | 0.667354 | 0.785414 | 0.45497  | 0.481789 | UP   | 546.4629 | 546.4622 |
| 6056 | M631T11_ | 1.991299 | -0.99371 | -0.80449 | 0.455018 | 0.481806 | DOWN | 631.2586 | 631.2584 |
| 6057 | M256T17_ | 1.678763 | -0.7474  | -0.81329 | 0.455065 | 0.481824 | DOWN | 256.1626 | 256.162  |
| 6058 | M356T32_ | 1.631952 | 0.706598 | 0.800772 | 0.455306 | 0.481914 | UP   | 356.2074 | 356.2071 |
| 6059 | M430T21  | 1.668869 | 0.738871 | 0.794258 | 0.455431 | 0.481961 | UP   | 430.2878 | 430.2866 |
| 6060 | M468T18  | 1.907893 | -0.93198 | -0.8122  | 0.455437 | 0.481963 | DOWN | 468.1365 | 468.1356 |
| 6061 | M696T10_ | 1.740098 | 0.799169 | 0.784407 | 0.455521 | 0.481994 | UP   | 696.1332 | 696.1319 |
| 6062 | M398T7   | 3.674147 | 1.877409 | 0.814634 | 0.455913 | 0.48214  | UP   | 398.3249 | 398.3239 |

|      |          |          |          |          |          |          |      |          |          |
|------|----------|----------|----------|----------|----------|----------|------|----------|----------|
| 6063 | M500T18_ | 2.29665  | 1.199531 | 0.805981 | 0.456101 | 0.482211 | UP   | 500.1037 | 500.0965 |
| 6064 | M974T11  | 2.388352 | 1.256015 | 0.792373 | 0.456144 | 0.482227 | UP   | 974.4515 | 974.4495 |
| 6065 | M394T20_ | 1.87501  | 0.906898 | 0.810554 | 0.45618  | 0.48224  | UP   | 394.2494 | 394.2491 |
| 6066 | M337T17_ | 1.719303 | 0.781824 | 0.784335 | 0.456423 | 0.48233  | UP   | 337.2032 | 337.2031 |
| 6067 | M619T17_ | 1.332918 | 0.414588 | 0.782457 | 0.456786 | 0.482465 | UP   | 619.4798 | 619.4785 |
| 6068 | M836T32  | 1.546899 | 0.629379 | 0.783118 | 0.45692  | 0.482515 | UP   | 835.5832 | 835.5824 |
| 6069 | M572T23  | 1.813006 | 0.858383 | 0.784987 | 0.456931 | 0.482519 | UP   | 571.9571 | 571.9568 |
| 6070 | M385T10_ | 1.522943 | 0.606862 | 0.784878 | 0.457093 | 0.482579 | UP   | 385.4866 | 385.4855 |
| 6071 | M446T32  | 1.476361 | 0.562046 | 0.795692 | 0.45719  | 0.482615 | UP   | 446.057  | 446.0567 |
| 6072 | M330T27  | 1.640522 | 0.714155 | 0.782632 | 0.457294 | 0.482654 | UP   | 330.1154 | 330.1153 |
| 6073 | M793T11_ | 1.49816  | 0.583192 | 0.781695 | 0.457346 | 0.482673 | UP   | 793.0987 | 793.0955 |
| 6074 | M333T10_ | 2.201095 | 1.138222 | 0.79195  | 0.457549 | 0.482748 | UP   | 332.7811 | 332.7806 |
| 6075 | M340T11  | 1.319183 | 0.399645 | 0.794013 | 0.457555 | 0.482751 | UP   | 340.2602 | 340.2597 |
| 6076 | M384T16_ | 1.899132 | 0.92534  | 0.781586 | 0.457733 | 0.482817 | UP   | 384.0036 | 384.0032 |
| 6077 | M446T26  | 1.565252 | 0.646395 | 0.797876 | 0.457759 | 0.482826 | UP   | 446.0565 | 446.0562 |
| 6078 | M325T25_ | 1.523125 | -0.60703 | -0.80466 | 0.458188 | 0.482985 | DOWN | 325.2013 | 325.2009 |
| 6079 | M610T11_ | 2.137505 | 1.095928 | 0.781547 | 0.45834  | 0.483041 | UP   | 610.2897 | 610.2891 |
| 6080 | M246T17  | 1.589436 | 0.668515 | 0.780024 | 0.459021 | 0.483293 | UP   | 246.082  | 246.0817 |
| 6081 | M580T28  | 1.734209 | 0.794277 | 0.779364 | 0.459022 | 0.483293 | UP   | 580.2127 | 580.2118 |
| 6082 | M515T18  | 1.814161 | 0.859302 | 0.778027 | 0.459139 | 0.483337 | UP   | 515.0119 | 515.0116 |
| 6083 | M514T32  | 1.861971 | 0.896831 | 0.790189 | 0.459173 | 0.483349 | UP   | 513.9911 | 513.9907 |
| 6084 | M374T10_ | 2.169577 | 1.117414 | 0.80394  | 0.459222 | 0.483367 | UP   | 373.7236 | 373.7153 |
| 6085 | M335T32_ | 1.418352 | 0.504216 | 0.788105 | 0.459578 | 0.483499 | UP   | 335.1624 | 335.1623 |
| 6086 | M262T12  | 1.748602 | 0.806202 | 0.780008 | 0.459947 | 0.483635 | UP   | 262.0164 | 262.0161 |
| 6087 | M713T43_ | 1.637305 | -0.71132 | -0.78864 | 0.460052 | 0.483673 | DOWN | 713.461  | 713.4603 |
| 6088 | M224T16_ | 1.396875 | 0.482203 | 0.811156 | 0.460147 | 0.483708 | UP   | 224.02   | 224.0197 |
| 6089 | M262T13  | 4.211265 | 2.074254 | 0.813058 | 0.460197 | 0.483727 | UP   | 262.1132 | 262.1128 |
| 6090 | M702T10_ | 1.698983 | 0.764672 | 0.776166 | 0.460281 | 0.483758 | UP   | 702.4969 | 702.4957 |
| 6091 | M500T14_ | 1.480496 | 0.566081 | 0.782641 | 0.460316 | 0.483771 | UP   | 500.3796 | 500.3793 |
| 6092 | M380T44_ | 1.083629 | 0.115872 | 0.780383 | 0.460344 | 0.483781 | UP   | 380.2281 | 380.2274 |
| 6093 | M608T30  | 1.512699 | 0.597125 | 0.786405 | 0.46044  | 0.483816 | UP   | 608.2651 | 608.2647 |
| 6094 | M316T19  | 1.652702 | 0.724826 | 0.775036 | 0.460651 | 0.483894 | UP   | 315.5716 | 315.5716 |
| 6095 | M311T32  | 2.380877 | -1.25149 | -0.80795 | 0.460962 | 0.484008 | DOWN | 311.1621 | 311.1612 |
| 6096 | M296T33  | 2.47953  | -1.31007 | -0.80846 | 0.461239 | 0.48411  | DOWN | 296.1913 | 296.1909 |
| 6097 | M315T33  | 1.712396 | 0.776017 | 0.775247 | 0.461267 | 0.48412  | UP   | 314.6493 | 314.649  |
| 6098 | M282T15_ | 1.570722 | 0.651428 | 0.773746 | 0.46153  | 0.484216 | UP   | 282.2795 | 282.279  |
| 6099 | M647T33  | 1.205964 | -0.27019 | -0.78897 | 0.461587 | 0.484237 | DOWN | 647.0227 | 647.0218 |
| 6100 | M295T13  | 1.781333 | 0.832957 | 0.794271 | 0.461691 | 0.484275 | UP   | 295.2466 | 295.2463 |
| 6101 | M539T22  | 1.825258 | -0.8681  | -0.79058 | 0.461712 | 0.484283 | DOWN | 539.1012 | 539.0998 |
| 6102 | M853T35  | 1.416436 | -0.50227 | -0.77361 | 0.461779 | 0.484308 | DOWN | 852.6399 | 852.6382 |
| 6103 | M179T15  | 1.810686 | 0.856536 | 0.775451 | 0.46206  | 0.484411 | UP   | 178.9462 | 178.9461 |
| 6104 | M540T10  | 1.657881 | 0.729341 | 0.776967 | 0.46208  | 0.484418 | UP   | 540.4489 | 540.4468 |
| 6105 | M599T23  | 3.206682 | -1.68108 | -0.80899 | 0.462089 | 0.484421 | DOWN | 599.3269 | 599.3255 |
| 6106 | M353T17  | 1.644281 | 0.717457 | 0.772838 | 0.462241 | 0.484477 | UP   | 353.0095 | 353.0089 |
| 6107 | M639T29  | 1.882685 | -0.91279 | -0.79401 | 0.462261 | 0.484484 | DOWN | 639.2622 | 639.2614 |
| 6108 | M312T21_ | 1.402214 | 0.487706 | 0.773871 | 0.462328 | 0.484509 | UP   | 312.2174 | 312.217  |
| 6109 | M383T10_ | 2.008331 | -1.006   | -0.79737 | 0.462336 | 0.484512 | DOWN | 383.2089 | 383.2079 |

|      |          |          |          |          |          |          |      |          |          |
|------|----------|----------|----------|----------|----------|----------|------|----------|----------|
| 6110 | M666T22  | 2.281676 | -1.19009 | -0.80392 | 0.462392 | 0.484532 | DOWN | 666.2967 | 666.2963 |
| 6111 | M456T24_ | 1.737457 | -0.79698 | -0.79697 | 0.462407 | 0.484538 | DOWN | 456.1872 | 456.187  |
| 6112 | M437T18  | 1.784396 | 0.835436 | 0.772506 | 0.462435 | 0.484548 | UP   | 436.9129 | 436.9125 |
| 6113 | M226T27  | 1.644302 | 0.717475 | 0.771729 | 0.46247  | 0.484561 | UP   | 226.0877 | 226.0875 |
| 6114 | M517T27_ | 2.034292 | -1.02453 | -0.80285 | 0.462708 | 0.484648 | DOWN | 517.1324 | 517.1317 |
| 6115 | M453T23  | 1.525983 | -0.60974 | -0.78467 | 0.462785 | 0.484676 | DOWN | 453.1675 | 453.1664 |
| 6116 | M431T17_ | 1.19684  | -0.25923 | -0.77451 | 0.4629   | 0.484718 | DOWN | 430.9151 | 430.9148 |
| 6117 | M197T19  | 1.441845 | 0.527916 | 0.783602 | 0.462923 | 0.484726 | UP   | 196.5219 | 196.5217 |
| 6118 | M359T10_ | 1.862942 | 0.897583 | 0.770972 | 0.463002 | 0.484755 | UP   | 358.7161 | 358.7153 |
| 6119 | M395T11_ | 3.403889 | -1.76718 | -0.80782 | 0.463156 | 0.484811 | DOWN | 395.2262 | 395.2255 |
| 6120 | M441T30  | 1.83338  | 0.874506 | 0.781568 | 0.463222 | 0.484836 | UP   | 440.5259 | 440.5255 |
| 6121 | M316T9   | 1.534976 | -0.61822 | -0.77679 | 0.463246 | 0.484844 | DOWN | 316.2118 | 316.2117 |
| 6122 | M305T39_ | 1.788484 | -0.83874 | -0.7955  | 0.463331 | 0.484875 | DOWN | 305.2387 | 305.2386 |
| 6123 | M502T10  | 2.235298 | 1.160467 | 0.776037 | 0.463412 | 0.484905 | UP   | 502.1929 | 502.1916 |
| 6124 | M377T20_ | 1.676834 | 0.74574  | 0.771598 | 0.46342  | 0.484908 | UP   | 377.1162 | 377.116  |
| 6125 | M572T19_ | 1.647563 | 0.720334 | 0.78088  | 0.463563 | 0.48496  | UP   | 572.3792 | 572.3782 |
| 6126 | M645T31_ | 1.872763 | 0.905168 | 0.780961 | 0.46364  | 0.484988 | UP   | 645.0071 | 645.0066 |
| 6127 | M534T19  | 1.456331 | 0.542338 | 0.771809 | 0.463703 | 0.485011 | UP   | 534.2549 | 534.2531 |
| 6128 | M782T10_ | 2.466219 | 1.302301 | 0.777842 | 0.463984 | 0.485113 | UP   | 781.6419 | 781.6415 |
| 6129 | M738T41_ | 1.407575 | -0.49321 | -0.76944 | 0.464161 | 0.485178 | DOWN | 738.427  | 738.4257 |
| 6130 | M813T22  | 2.258789 | -1.17555 | -0.80021 | 0.464383 | 0.485259 | DOWN | 813.3009 | 813.3004 |
| 6131 | M720T17  | 1.790681 | 0.840509 | 0.76761  | 0.464786 | 0.485405 | UP   | 720.409  | 720.4076 |
| 6132 | M360T10_ | 1.590054 | 0.669075 | 0.773375 | 0.464797 | 0.485409 | UP   | 359.7355 | 359.7342 |
| 6133 | M766T29_ | 1.422404 | 0.508331 | 0.767362 | 0.464942 | 0.485462 | UP   | 766.1955 | 766.1952 |
| 6134 | M256T31  | 1.771747 | 0.825172 | 0.783804 | 0.464993 | 0.48548  | UP   | 256.003  | 256.0027 |
| 6135 | M230T22_ | 1.617001 | 0.69332  | 0.767074 | 0.465172 | 0.485545 | UP   | 230.0238 | 230.0162 |
| 6136 | M268T31_ | 1.514797 | 0.599124 | 0.768029 | 0.465411 | 0.485632 | UP   | 268.0827 | 268.0821 |
| 6137 | M364T29_ | 1.862491 | 0.897234 | 0.774635 | 0.465505 | 0.485666 | UP   | 363.5938 | 363.5936 |
| 6138 | M278T10  | 1.555965 | 0.637809 | 0.768551 | 0.465593 | 0.485698 | UP   | 277.7318 | 277.7309 |
| 6139 | M473T35_ | 2.424502 | 1.277688 | 0.796153 | 0.465676 | 0.485728 | UP   | 473.3448 | 473.3444 |
| 6140 | M376T9_7 | 2.544539 | 1.347405 | 0.785587 | 0.465994 | 0.485843 | UP   | 376.3981 | 376.3974 |
| 6141 | M296T24  | 1.894392 | -0.92174 | -0.79294 | 0.46614  | 0.485896 | DOWN | 296.1939 | 296.1934 |
| 6142 | M326T42  | 1.495511 | -0.58064 | -0.77983 | 0.46618  | 0.48591  | DOWN | 326.1606 | 326.1599 |
| 6143 | M472T23_ | 1.666258 | 0.736612 | 0.766845 | 0.466206 | 0.48592  | UP   | 472.0321 | 472.0316 |
| 6144 | M461T36  | 1.436426 | 0.522484 | 0.794371 | 0.466279 | 0.485946 | UP   | 461.2684 | 461.2684 |
| 6145 | M658T29  | 2.343679 | 1.228775 | 0.782073 | 0.466556 | 0.486047 | UP   | 658.2372 | 658.2352 |
| 6146 | M327T23_ | 1.487472 | -0.57286 | -0.78753 | 0.466677 | 0.48609  | DOWN | 327.1996 | 327.199  |
| 6147 | M739T41_ | 1.515257 | -0.59956 | -0.76436 | 0.466831 | 0.486146 | DOWN | 739.4302 | 739.4289 |
| 6148 | M327T23_ | 1.880866 | -0.9114  | -0.78882 | 0.466899 | 0.48617  | DOWN | 327.132  | 327.1314 |
| 6149 | M819T30  | 3.754347 | -1.90856 | -0.79221 | 0.4669   | 0.486171 | DOWN | 819.4769 | 819.4763 |
| 6150 | M378T9_1 | 2.513035 | 1.329431 | 0.774515 | 0.46694  | 0.486185 | UP   | 377.8242 | 377.8239 |
| 6151 | M338T38  | 1.2664   | -0.34073 | -0.76576 | 0.466953 | 0.48619  | DOWN | 338.224  | 338.2239 |
| 6152 | M429T10_ | 1.873986 | 0.90611  | 0.764176 | 0.467055 | 0.486227 | UP   | 428.7259 | 428.7252 |
| 6153 | M333T17_ | 1.837757 | -0.87795 | -0.79229 | 0.467069 | 0.486232 | DOWN | 333.1735 | 333.1732 |
| 6154 | M330T33  | 1.65815  | -0.72957 | -0.78535 | 0.467169 | 0.486268 | DOWN | 330.2147 | 330.2144 |
| 6155 | M233T15  | 1.574784 | 0.655154 | 0.765102 | 0.467417 | 0.486358 | UP   | 233.1109 | 233.1103 |
| 6156 | M599T29_ | 1.787648 | 0.838063 | 0.763831 | 0.467425 | 0.48636  | UP   | 598.7609 | 598.7605 |

|      |          |          |          |          |          |          |      |          |          |
|------|----------|----------|----------|----------|----------|----------|------|----------|----------|
| 6157 | M267T27_ | 1.769766 | -0.82356 | -0.7862  | 0.467427 | 0.486361 | DOWN | 267.1722 | 267.1717 |
| 6158 | M703T22  | 2.039078 | -1.02792 | -0.79001 | 0.467464 | 0.486374 | DOWN | 703.1758 | 703.1753 |
| 6159 | M298T32_ | 1.615014 | 0.691547 | 0.794803 | 0.467467 | 0.486375 | UP   | 298.1314 | 298.1313 |
| 6160 | M282T29  | 1.673817 | 0.743142 | 0.770316 | 0.467538 | 0.486401 | UP   | 282.1153 | 282.115  |
| 6161 | M282T39  | 1.641271 | -0.71481 | -0.78756 | 0.46769  | 0.486456 | DOWN | 282.2792 | 282.2787 |
| 6162 | M441T10_ | 1.616109 | 0.692524 | 0.766802 | 0.467694 | 0.486458 | UP   | 441.3439 | 441.3427 |
| 6163 | M497T36  | 1.509383 | 0.593959 | 0.762941 | 0.467826 | 0.486505 | UP   | 497.3878 | 497.3873 |
| 6164 | M395T22  | 1.781699 | -0.83325 | -0.784   | 0.467985 | 0.486562 | DOWN | 395.0009 | 395.0002 |
| 6165 | M250T15  | 1.531099 | 0.614568 | 0.761966 | 0.468017 | 0.486574 | UP   | 250.2095 | 250.2089 |
| 6166 | M212T10_ | 2.094147 | 1.066363 | 0.762891 | 0.468146 | 0.48662  | UP   | 212.4263 | 212.4261 |
| 6167 | M371T31_ | 2.792677 | -1.48165 | -0.79921 | 0.468187 | 0.486635 | DOWN | 371.0632 | 371.0629 |
| 6168 | M491T29  | 1.77156  | -0.82502 | -0.78402 | 0.468278 | 0.486668 | DOWN | 491.3611 | 491.3597 |
| 6169 | M275T27_ | 1.693399 | 0.759922 | 0.761758 | 0.468337 | 0.486689 | UP   | 274.6256 | 274.6253 |
| 6170 | M443T10  | 1.894941 | 0.922153 | 0.762372 | 0.468386 | 0.486707 | UP   | 443.169  | 443.1678 |
| 6171 | M351T22_ | 1.708523 | 0.77275  | 0.761081 | 0.46845  | 0.48673  | UP   | 350.7551 | 350.7549 |
| 6172 | M608T25  | 1.51396  | 0.598327 | 0.770469 | 0.46862  | 0.486791 | UP   | 608.3635 | 608.3629 |
| 6173 | M202T9_1 | 1.563453 | -0.64474 | -0.76085 | 0.468626 | 0.486793 | DOWN | 202.1074 | 202.1071 |
| 6174 | M316T14  | 1.490829 | 0.576115 | 0.762616 | 0.468645 | 0.4868   | UP   | 316.1992 | 316.1986 |
| 6175 | M305T32_ | 1.499207 | 0.584199 | 0.760801 | 0.468753 | 0.486838 | UP   | 305.2687 | 305.2682 |
| 6176 | M491T12  | 1.678317 | 0.747015 | 0.777557 | 0.469113 | 0.486968 | UP   | 491.3286 | 491.3284 |
| 6177 | M257T11_ | 1.768889 | 0.822844 | 0.759952 | 0.469176 | 0.48699  | UP   | 257.0596 | 257.0593 |
| 6178 | M539T12_ | 1.484639 | 0.570113 | 0.759855 | 0.469221 | 0.487007 | UP   | 539.3891 | 539.3889 |
| 6179 | M626T33  | 1.617075 | 0.693386 | 0.760565 | 0.469277 | 0.487027 | UP   | 626.2911 | 626.2902 |
| 6180 | M332T21_ | 1.813999 | 0.859174 | 0.765519 | 0.469304 | 0.487036 | UP   | 332.472  | 332.4711 |
| 6181 | M355T20  | 1.418265 | -0.50413 | -0.775   | 0.469326 | 0.487044 | DOWN | 355.2253 | 355.2252 |
| 6182 | M570T9_1 | 1.791037 | 0.840795 | 0.774408 | 0.469613 | 0.487147 | UP   | 570.2645 | 570.2588 |
| 6183 | M505T30  | 1.804109 | 0.851286 | 0.765764 | 0.469636 | 0.487155 | UP   | 505.3789 | 505.3778 |
| 6184 | M361T19  | 1.503758 | 0.588573 | 0.761946 | 0.469639 | 0.487156 | UP   | 361.3297 | 361.3291 |
| 6185 | M428T32  | 1.783794 | -0.83495 | -0.77555 | 0.469642 | 0.487158 | DOWN | 428.3525 | 428.3522 |
| 6186 | M610T29_ | 1.518238 | -0.6024  | -0.75909 | 0.469694 | 0.487176 | DOWN | 610.2428 | 610.2362 |
| 6187 | M638T44  | 1.123692 | -0.16825 | -0.75973 | 0.469771 | 0.487204 | DOWN | 638.4098 | 638.4092 |
| 6188 | M661T21  | 1.670718 | 0.740468 | 0.759485 | 0.46981  | 0.487218 | UP   | 660.9771 | 660.9766 |
| 6189 | M488T13_ | 1.812596 | 0.858057 | 0.764961 | 0.469876 | 0.487241 | UP   | 488.1733 | 488.1732 |
| 6190 | M506T14  | 1.987603 | 0.991029 | 0.759708 | 0.470027 | 0.487295 | UP   | 506.1663 | 506.1661 |
| 6191 | M397T19  | 1.498841 | 0.583848 | 0.760348 | 0.470084 | 0.487316 | UP   | 396.5968 | 396.5964 |
| 6192 | M295T24  | 1.719609 | -0.78208 | -0.77971 | 0.470219 | 0.487364 | DOWN | 295.1906 | 295.19   |
| 6193 | M673T34_ | 2.009517 | 1.006849 | 0.77548  | 0.470415 | 0.487434 | UP   | 672.5001 | 672.4993 |
| 6194 | M452T27_ | 1.339107 | -0.42127 | -0.7605  | 0.470446 | 0.487445 | DOWN | 452.1717 | 452.1712 |
| 6195 | M371T25  | 1.380223 | 0.464901 | 0.760497 | 0.470517 | 0.487471 | UP   | 371.327  | 371.326  |
| 6196 | M626T30  | 1.400997 | 0.486454 | 0.775573 | 0.470532 | 0.487476 | UP   | 626.2827 | 626.2734 |
| 6197 | M544T20_ | 2.483899 | -1.31261 | -0.79141 | 0.470567 | 0.487489 | DOWN | 544.0611 | 544.0609 |
| 6198 | M730T32  | 1.517752 | -0.60194 | -0.75744 | 0.470606 | 0.487503 | DOWN | 730.2002 | 730.1986 |
| 6199 | M515T22_ | 1.996976 | 0.997817 | 0.768423 | 0.470629 | 0.487511 | UP   | 515.1366 | 515.1365 |
| 6200 | M593T10_ | 1.792021 | 0.841588 | 0.757395 | 0.470633 | 0.487512 | UP   | 593.3871 | 593.3859 |
| 6201 | M254T11  | 1.620424 | 0.696372 | 0.756941 | 0.47083  | 0.487583 | UP   | 254.2481 | 254.248  |
| 6202 | M712T35  | 1.748405 | 0.80604  | 0.762141 | 0.470928 | 0.487618 | UP   | 712.4787 | 712.4772 |
| 6203 | M611T11_ | 2.452231 | 1.294095 | 0.766103 | 0.471046 | 0.48766  | UP   | 611.2356 | 611.2333 |

|      |          |          |          |          |          |          |      |          |          |
|------|----------|----------|----------|----------|----------|----------|------|----------|----------|
| 6204 | M625T11_ | 1.894175 | 0.92157  | 0.755828 | 0.471422 | 0.487794 | UP   | 624.7967 | 624.7963 |
| 6205 | M562T18_ | 1.912632 | 0.93556  | 0.761395 | 0.471448 | 0.487803 | UP   | 562.1231 | 562.1227 |
| 6206 | M565T34  | 1.619943 | 0.695943 | 0.756662 | 0.471546 | 0.487838 | UP   | 564.895  | 564.8943 |
| 6207 | M396T21_ | 1.590863 | 0.669809 | 0.757107 | 0.471618 | 0.487864 | UP   | 396.2663 | 396.2661 |
| 6208 | M339T29_ | 1.329234 | 0.410595 | 0.764989 | 0.471699 | 0.487893 | UP   | 339.1013 | 339.1011 |
| 6209 | M267T19  | 1.416392 | 0.50222  | 0.757749 | 0.472147 | 0.488052 | UP   | 267.2513 | 267.2507 |
| 6210 | M317T20_ | 1.671384 | 0.741043 | 0.753935 | 0.472499 | 0.488178 | UP   | 317.1051 | 317.1046 |
| 6211 | M400T34  | 1.985816 | -0.98973 | -0.78578 | 0.472518 | 0.488184 | DOWN | 400.3211 | 400.3206 |
| 6212 | M486T30  | 1.697941 | -0.76379 | -0.75898 | 0.472548 | 0.488195 | DOWN | 486.3553 | 486.3546 |
| 6213 | M611T11_ | 2.093572 | 1.065966 | 0.754948 | 0.472609 | 0.488217 | UP   | 610.7911 | 610.7901 |
| 6214 | M409T22_ | 1.711298 | 0.775091 | 0.75404  | 0.472776 | 0.488276 | UP   | 408.9883 | 408.9878 |
| 6215 | M322T14_ | 1.582154 | 0.66189  | 0.753365 | 0.472861 | 0.488306 | UP   | 322.2856 | 322.2748 |
| 6216 | M272T18  | 1.67262  | -0.74211 | -0.77762 | 0.472949 | 0.488338 | DOWN | 272.1861 | 272.1853 |
| 6217 | M658T23  | 1.698964 | 0.764655 | 0.75355  | 0.473101 | 0.488392 | UP   | 658.4684 | 658.468  |
| 6218 | M368T10_ | 1.996469 | 0.99745  | 0.754852 | 0.473302 | 0.488463 | UP   | 368.221  | 368.2189 |
| 6219 | M330T24  | 1.83842  | -0.87847 | -0.77752 | 0.473307 | 0.488465 | DOWN | 330.2278 | 330.2271 |
| 6220 | M563T22  | 1.95318  | 0.965825 | 0.762388 | 0.473373 | 0.488488 | UP   | 563.1609 | 563.1606 |
| 6221 | M380T40  | 1.518927 | 0.603053 | 0.753283 | 0.473413 | 0.488502 | UP   | 380.3371 | 380.3365 |
| 6222 | M730T41  | 1.326118 | -0.40721 | -0.75199 | 0.473631 | 0.48858  | DOWN | 730.4603 | 730.4588 |
| 6223 | M342T10_ | 1.891288 | 0.919369 | 0.772652 | 0.473795 | 0.488638 | UP   | 341.765  | 341.7638 |
| 6224 | M372T24_ | 1.37886  | -0.46348 | -0.77602 | 0.473979 | 0.488703 | DOWN | 372.2743 | 372.2742 |
| 6225 | M1577T10 | 2.221528 | 1.151552 | 0.754429 | 0.47401  | 0.488714 | UP   | 1577.022 | 1577.018 |
| 6226 | M358T10  | 1.860704 | 0.895849 | 0.751444 | 0.474081 | 0.488739 | UP   | 358.2146 | 358.2133 |
| 6227 | M300T27  | 1.592114 | 0.670944 | 0.751218 | 0.474487 | 0.488882 | UP   | 299.6256 | 299.6255 |
| 6228 | M352T21  | 1.777159 | 0.829573 | 0.750499 | 0.474628 | 0.488932 | UP   | 352.1211 | 352.1209 |
| 6229 | M394T9   | 2.124598 | -1.08719 | -0.77377 | 0.474647 | 0.488939 | DOWN | 394.2313 | 394.2308 |
| 6230 | M382T10_ | 1.646055 | 0.719013 | 0.750147 | 0.474716 | 0.488963 | UP   | 382.2941 | 382.2937 |
| 6231 | M540T35_ | 1.489375 | 0.574707 | 0.751199 | 0.474731 | 0.488969 | UP   | 540.4107 | 540.4097 |
| 6232 | M306T23_ | 1.818509 | -0.86276 | -0.75209 | 0.475116 | 0.489105 | DOWN | 306.2689 | 306.2687 |
| 6233 | M382T40  | 2.503033 | -1.32368 | -0.78104 | 0.475199 | 0.489134 | DOWN | 382.3104 | 382.31   |
| 6234 | M515T23_ | 1.646513 | 0.719414 | 0.749715 | 0.475209 | 0.489138 | UP   | 515.1366 | 515.1365 |
| 6235 | M765T25  | 1.8103   | 0.856229 | 0.751264 | 0.475267 | 0.489158 | UP   | 765.4302 | 765.429  |
| 6236 | M1107T11 | 1.796921 | 0.845527 | 0.749365 | 0.475309 | 0.489173 | UP   | 1107.115 | 1107.114 |
| 6237 | M261T12  | 2.861682 | 1.516863 | 0.780175 | 0.4755   | 0.48924  | UP   | 261.11   | 261.1097 |
| 6238 | M312T15  | 1.52701  | 0.610709 | 0.753476 | 0.475519 | 0.489247 | UP   | 312.181  | 312.1806 |
| 6239 | M365T10_ | 1.770804 | 0.824404 | 0.748351 | 0.47569  | 0.489307 | UP   | 365.186  | 365.1856 |
| 6240 | M376T17_ | 1.23514  | -0.30467 | -0.75389 | 0.475732 | 0.489322 | DOWN | 376.2138 | 376.2136 |
| 6241 | M615T26  | 1.719098 | 0.781652 | 0.752745 | 0.475774 | 0.489337 | UP   | 615.1672 | 615.1669 |
| 6242 | M285T37  | 1.697979 | -0.76382 | -0.77179 | 0.475882 | 0.489375 | DOWN | 285.2215 | 285.2211 |
| 6243 | M185T31  | 1.16612  | -0.22172 | -0.75607 | 0.475972 | 0.489407 | DOWN | 185.0808 | 185.0807 |
| 6244 | M344T9   | 1.694523 | -0.76088 | -0.76243 | 0.476065 | 0.489439 | DOWN | 343.7007 | 343.7001 |
| 6245 | M746T29  | 1.682073 | 0.75024  | 0.75089  | 0.476343 | 0.489537 | UP   | 746.1906 | 746.1902 |
| 6246 | M451T22_ | 1.677241 | -0.74609 | -0.77581 | 0.476514 | 0.489597 | DOWN | 451.0321 | 451.0309 |
| 6247 | M642T17_ | 1.353963 | 0.437189 | 0.748865 | 0.476909 | 0.489736 | UP   | 642.4333 | 642.4331 |
| 6248 | M525T20  | 1.552239 | 0.634351 | 0.74613  | 0.476972 | 0.489759 | UP   | 525.4247 | 525.4245 |
| 6249 | M1116T11 | 1.855556 | 0.891851 | 0.748623 | 0.477383 | 0.489903 | UP   | 1116.103 | 1116.101 |
| 6250 | M474T23_ | 1.227241 | -0.29542 | -0.74971 | 0.477431 | 0.489919 | DOWN | 474.2598 | 474.2591 |

|      |          |          |          |          |          |          |      |          |          |
|------|----------|----------|----------|----------|----------|----------|------|----------|----------|
| 6251 | M568T26  | 1.516174 | 0.600436 | 0.747608 | 0.477508 | 0.489946 | UP   | 568.2337 | 568.2328 |
| 6252 | M440T35_ | 1.35473  | 0.438005 | 0.746505 | 0.477608 | 0.489982 | UP   | 440.4097 | 440.4091 |
| 6253 | M766T41  | 1.428615 | -0.51462 | -0.74555 | 0.477827 | 0.490058 | DOWN | 766.4582 | 766.4567 |
| 6254 | M733T27  | 1.725393 | 0.786925 | 0.745074 | 0.478011 | 0.490123 | UP   | 732.9065 | 732.9054 |
| 6255 | M938T34  | 1.587889 | 0.66711  | 0.744028 | 0.478166 | 0.490177 | UP   | 937.6515 | 937.6501 |
| 6256 | M385T16_ | 1.803574 | 0.850859 | 0.745501 | 0.478175 | 0.49018  | UP   | 385.002  | 385.0019 |
| 6257 | M390T27  | 1.558229 | 0.639908 | 0.743825 | 0.478282 | 0.490218 | UP   | 390.1367 | 390.1362 |
| 6258 | M348T12  | 1.830847 | -0.87251 | -0.75507 | 0.478421 | 0.490266 | DOWN | 348.2342 | 348.2339 |
| 6259 | M445T34  | 2.001605 | -1.00116 | -0.77782 | 0.478481 | 0.490287 | DOWN | 445.2584 | 445.258  |
| 6260 | M512T35_ | 2.25302  | -1.17186 | -0.75691 | 0.478653 | 0.490348 | DOWN | 512.4324 | 512.4294 |
| 6261 | M354T23_ | 1.60202  | 0.679893 | 0.748446 | 0.478699 | 0.490364 | UP   | 354.0063 | 354.0061 |
| 6262 | M420T15  | 1.900279 | 0.926211 | 0.745575 | 0.478804 | 0.4904   | UP   | 420.1106 | 420.1105 |
| 6263 | M315T19  | 1.690578 | 0.757517 | 0.743658 | 0.478823 | 0.490407 | UP   | 315.0794 | 315.0793 |
| 6264 | M433T22_ | 1.526952 | -0.61065 | -0.74851 | 0.478876 | 0.490425 | DOWN | 433.3318 | 433.3312 |
| 6265 | M253T21  | 1.590582 | -0.66955 | -0.7669  | 0.478902 | 0.490435 | DOWN | 253.1913 | 253.1909 |
| 6266 | M342T10_ | 1.780522 | 0.8323   | 0.747249 | 0.478974 | 0.49046  | UP   | 341.7217 | 341.7207 |
| 6267 | M622T22  | 1.969054 | -0.9775  | -0.76837 | 0.47901  | 0.490472 | DOWN | 622.2708 | 622.2699 |
| 6268 | M314T16_ | 1.869128 | 0.902365 | 0.742552 | 0.47903  | 0.490479 | UP   | 314.0147 | 314.0145 |
| 6269 | M371T45  | 1.393658 | 0.478877 | 0.743531 | 0.479032 | 0.49048  | UP   | 371.2581 | 371.2576 |
| 6270 | M598T34  | 1.992907 | -0.99487 | -0.76489 | 0.479258 | 0.490559 | DOWN | 598.3875 | 598.3864 |
| 6271 | M663T21_ | 1.615585 | 0.692057 | 0.741811 | 0.479472 | 0.490634 | UP   | 662.9923 | 662.9921 |
| 6272 | M414T22_ | 1.580263 | 0.660165 | 0.746091 | 0.479597 | 0.490677 | UP   | 414.0303 | 414.0301 |
| 6273 | M311T13  | 1.550506 | 0.632739 | 0.741419 | 0.479639 | 0.490692 | UP   | 311.2698 | 311.2689 |
| 6274 | M500T10_ | 1.846433 | 0.884741 | 0.748898 | 0.479686 | 0.490708 | UP   | 500.1915 | 500.1814 |
| 6275 | M283T8   | 1.615453 | -0.69194 | -0.74111 | 0.47987  | 0.490772 | DOWN | 283.0699 | 283.0696 |
| 6276 | M212T11_ | 1.807927 | 0.854337 | 0.74085  | 0.48001  | 0.490821 | UP   | 212.0372 | 212.0366 |
| 6277 | M478T17  | 1.471757 | 0.557539 | 0.740872 | 0.480017 | 0.490823 | UP   | 478.4005 | 478.3999 |
| 6278 | M416T15  | 1.879597 | 0.910423 | 0.740415 | 0.480246 | 0.490903 | UP   | 416.0093 | 416.0085 |
| 6279 | M184T30  | 1.40247  | -0.48797 | -0.74342 | 0.480315 | 0.490927 | DOWN | 184.0734 | 184.0731 |
| 6280 | M415T25  | 1.626777 | -0.70202 | -0.76683 | 0.480475 | 0.490983 | DOWN | 415.2118 | 415.2111 |
| 6281 | M603T21_ | 1.634852 | 0.70916  | 0.739966 | 0.48052  | 0.490999 | UP   | 603.4151 | 603.4147 |
| 6282 | M467T9_2 | 1.658722 | 0.730072 | 0.746639 | 0.480828 | 0.491106 | UP   | 467.3598 | 467.3582 |
| 6283 | M425T17  | 1.813228 | 0.85856  | 0.739865 | 0.480833 | 0.491107 | UP   | 424.9984 | 424.9983 |
| 6284 | M309T22_ | 1.741113 | -0.80001 | -0.77264 | 0.480836 | 0.491108 | DOWN | 309.0911 | 309.091  |
| 6285 | M306T32_ | 1.560312 | 0.641835 | 0.739478 | 0.480963 | 0.491152 | UP   | 306.2721 | 306.272  |
| 6286 | M559T17  | 1.897045 | 0.923754 | 0.739765 | 0.481116 | 0.491206 | UP   | 559.138  | 559.1378 |
| 6287 | M389T22_ | 1.641003 | 0.714578 | 0.738686 | 0.481245 | 0.49125  | UP   | 389.007  | 389.0067 |
| 6288 | M437T24  | 2.280144 | -1.18912 | -0.77373 | 0.481702 | 0.491409 | DOWN | 437.2649 | 437.2643 |
| 6289 | M612T11_ | 2.339383 | 1.226128 | 0.746135 | 0.481894 | 0.491475 | UP   | 612.2396 | 612.238  |
| 6290 | M792T29_ | 1.532209 | 0.615613 | 0.737495 | 0.481993 | 0.49151  | UP   | 792.2661 | 792.2657 |
| 6291 | M526T32_ | 1.50005  | 0.58501  | 0.737592 | 0.482088 | 0.491543 | UP   | 526.3951 | 526.394  |
| 6292 | M429T35  | 2.454607 | 1.295492 | 0.764565 | 0.482092 | 0.491544 | UP   | 429.3185 | 429.3181 |
| 6293 | M454T17  | 1.882835 | 0.912907 | 0.738139 | 0.482126 | 0.491556 | UP   | 453.9311 | 453.9305 |
| 6294 | M329T10  | 1.540947 | 0.623818 | 0.74002  | 0.482167 | 0.49157  | UP   | 329.2438 | 329.2437 |
| 6295 | M200T9   | 1.942045 | 0.957576 | 0.741072 | 0.482189 | 0.491578 | UP   | 200.0878 | 200.0843 |
| 6296 | M266T19  | 1.399237 | 0.484641 | 0.740113 | 0.48233  | 0.491626 | UP   | 266.2481 | 266.2474 |
| 6297 | M349T27_ | 1.59831  | 0.676548 | 0.736323 | 0.48258  | 0.491713 | UP   | 348.7839 | 348.7838 |

|      |          |          |          |          |          |          |      |          |          |
|------|----------|----------|----------|----------|----------|----------|------|----------|----------|
| 6298 | M371T21_ | 1.691701 | -0.75847 | -0.75136 | 0.482607 | 0.491722 | DOWN | 371.131  | 371.1309 |
| 6299 | M634T29_ | 2.149949 | 1.104303 | 0.764776 | 0.482695 | 0.491753 | UP   | 634.2371 | 634.2355 |
| 6300 | M665T30  | 1.106466 | 0.14596  | 0.736015 | 0.482837 | 0.491802 | UP   | 665.4671 | 665.466  |
| 6301 | M748T29  | 1.712793 | 0.776351 | 0.742718 | 0.482852 | 0.491807 | UP   | 748.186  | 748.1853 |
| 6302 | M791T35  | 1.44009  | 0.526159 | 0.735902 | 0.482875 | 0.491815 | UP   | 790.5897 | 790.5888 |
| 6303 | M425T10_ | 1.747108 | -0.80497 | -0.75682 | 0.482889 | 0.49182  | DOWN | 425.2037 | 425.1954 |
| 6304 | M331T10_ | 2.209372 | 1.143637 | 0.748769 | 0.48293  | 0.491834 | UP   | 331.1885 | 331.1883 |
| 6305 | M332T16_ | 1.396304 | 0.481613 | 0.736374 | 0.48294  | 0.491838 | UP   | 332.1941 | 332.1936 |
| 6306 | M348T33  | 1.545705 | 0.628265 | 0.735641 | 0.482964 | 0.491846 | UP   | 348.2899 | 348.2896 |
| 6307 | M950T44  | 1.098865 | -0.13601 | -0.7356  | 0.483033 | 0.49187  | DOWN | 949.5938 | 949.5921 |
| 6308 | M272T17  | 1.557817 | -0.63953 | -0.76208 | 0.483181 | 0.491921 | DOWN | 272.1859 | 272.1853 |
| 6309 | M277T18_ | 1.813645 | 0.858892 | 0.740754 | 0.483212 | 0.491932 | UP   | 277.0561 | 277.0557 |
| 6310 | M452T27_ | 1.537761 | -0.62083 | -0.75808 | 0.483361 | 0.491983 | DOWN | 452.3134 | 452.3127 |
| 6311 | M355T16  | 1.841884 | 0.881182 | 0.73635  | 0.483575 | 0.492057 | UP   | 355.0413 | 355.0412 |
| 6312 | M335T10_ | 1.824577 | 0.867562 | 0.7345   | 0.483638 | 0.492079 | UP   | 334.674  | 334.6737 |
| 6313 | M501T10  | 2.041506 | 1.029634 | 0.738723 | 0.483755 | 0.492119 | UP   | 501.1896 | 501.1879 |
| 6314 | M399T30_ | 1.462631 | 0.548566 | 0.73553  | 0.483828 | 0.492144 | UP   | 399.2504 | 399.2499 |
| 6315 | M1113T29 | 2.477423 | -1.30884 | -0.75618 | 0.48412  | 0.492245 | DOWN | 1112.678 | 1112.676 |
| 6316 | M172T19  | 1.500514 | 0.585457 | 0.73514  | 0.484314 | 0.492311 | UP   | 172.1697 | 172.1692 |
| 6317 | M325T27_ | 1.492565 | 0.577794 | 0.734426 | 0.484373 | 0.492332 | UP   | 325.0897 | 325.0892 |
| 6318 | M299T22_ | 1.973602 | -0.98083 | -0.74973 | 0.484575 | 0.492401 | DOWN | 299.0815 | 299.0813 |
| 6319 | M255T11  | 1.775842 | 0.828503 | 0.732605 | 0.484711 | 0.492448 | UP   | 255.0642 | 255.0637 |
| 6320 | M490T9_5 | 1.541554 | 0.624385 | 0.750293 | 0.484861 | 0.4925   | UP   | 490.3217 | 490.3206 |
| 6321 | M1112T11 | 1.709901 | 0.773913 | 0.734514 | 0.484899 | 0.492513 | UP   | 1111.63  | 1111.626 |
| 6322 | M482T32_ | 1.489146 | 0.574485 | 0.732571 | 0.484943 | 0.492528 | UP   | 482.3688 | 482.3679 |
| 6323 | M375T19  | 1.400668 | 0.486115 | 0.735133 | 0.485083 | 0.492576 | UP   | 375.301  | 375.3001 |
| 6324 | M312T17_ | 1.779721 | 0.831651 | 0.731836 | 0.485323 | 0.492658 | UP   | 312.0896 | 312.0893 |
| 6325 | M331T22_ | 1.732736 | 0.793052 | 0.735472 | 0.48538  | 0.492678 | UP   | 331.0844 | 331.0843 |
| 6326 | M240T16  | 1.712227 | 0.775874 | 0.732368 | 0.485474 | 0.49271  | UP   | 240.0684 | 240.0679 |
| 6327 | M624T28  | 2.376436 | -1.2488  | -0.7588  | 0.485522 | 0.492727 | DOWN | 624.1999 | 624.1995 |
| 6328 | M311T17_ | 1.990047 | 0.992802 | 0.73214  | 0.485547 | 0.492735 | UP   | 311.3789 | 311.3789 |
| 6329 | M485T11  | 1.584963 | 0.66445  | 0.734084 | 0.4856   | 0.492753 | UP   | 485.3702 | 485.3695 |
| 6330 | M215T18  | 1.295123 | -0.37309 | -0.74534 | 0.48569  | 0.492784 | DOWN | 215.0571 | 215.057  |
| 6331 | M283T12  | 1.435965 | 0.52202  | 0.731965 | 0.485708 | 0.49279  | UP   | 283.2381 | 283.2378 |
| 6332 | M219T10_ | 1.642377 | 0.715785 | 0.731211 | 0.485797 | 0.492821 | UP   | 219.1747 | 219.1746 |
| 6333 | M303T23  | 1.528731 | -0.61233 | -0.74797 | 0.485901 | 0.492857 | DOWN | 303.1807 | 303.1802 |
| 6334 | M322T23_ | 1.697909 | -0.76376 | -0.7384  | 0.486275 | 0.492985 | DOWN | 322.0545 | 322.0541 |
| 6335 | M780T41  | 1.675475 | 0.744571 | 0.745365 | 0.48647  | 0.493051 | UP   | 780.2575 | 780.2564 |
| 6336 | M282T16  | 1.752322 | 0.809268 | 0.731466 | 0.486482 | 0.493055 | UP   | 282.0984 | 282.0982 |
| 6337 | M313T16  | 1.540246 | 0.623161 | 0.731032 | 0.486757 | 0.49315  | UP   | 313.1802 | 313.1798 |
| 6338 | M1115T11 | 1.842671 | 0.881799 | 0.733403 | 0.486757 | 0.49315  | UP   | 1114.6   | 1114.598 |
| 6339 | M507T9   | 2.133334 | 1.09311  | 0.742913 | 0.48681  | 0.493168 | UP   | 507.2627 | 507.2613 |
| 6340 | M387T45  | 2.886203 | 1.529173 | 0.762438 | 0.48684  | 0.493178 | UP   | 387.2531 | 387.2527 |
| 6341 | M734T24_ | 1.447331 | 0.533395 | 0.738893 | 0.486841 | 0.493178 | UP   | 733.5512 | 733.5502 |
| 6342 | M364T33  | 1.826863 | 0.869369 | 0.7373   | 0.486878 | 0.493191 | UP   | 363.6113 | 363.6112 |
| 6343 | M244T13_ | 1.921787 | 0.942448 | 0.755268 | 0.486908 | 0.493201 | UP   | 244.2273 | 244.227  |
| 6344 | M774T23  | 2.187082 | -1.12901 | -0.75232 | 0.487005 | 0.493234 | DOWN | 774.1833 | 774.1819 |

|      |          |          |          |          |          |          |      |          |          |
|------|----------|----------|----------|----------|----------|----------|------|----------|----------|
| 6345 | M339T10_ | 1.719533 | 0.782017 | 0.729293 | 0.487083 | 0.493261 | UP   | 338.8078 | 338.7991 |
| 6346 | M732T37  | 1.479172 | 0.56479  | 0.728829 | 0.487087 | 0.493262 | UP   | 731.5354 | 731.5349 |
| 6347 | M358T20  | 1.674313 | 0.743569 | 0.728768 | 0.487369 | 0.493359 | UP   | 358.1318 | 358.1315 |
| 6348 | M429T30  | 1.144951 | 0.195285 | 0.728435 | 0.48737  | 0.493359 | UP   | 429.3008 | 429.3001 |
| 6349 | M695T27  | 1.557837 | 0.639545 | 0.729874 | 0.487492 | 0.493401 | UP   | 695.1779 | 695.1772 |
| 6350 | M791T45  | 1.115853 | -0.15815 | -0.7304  | 0.487594 | 0.493435 | DOWN | 790.6165 | 790.6151 |
| 6351 | M717T9_2 | 1.95387  | 0.966334 | 0.74317  | 0.487595 | 0.493436 | UP   | 717.4894 | 717.4874 |
| 6352 | M567T10_ | 1.623966 | 0.699522 | 0.728217 | 0.487609 | 0.493441 | UP   | 566.9298 | 566.9279 |
| 6353 | M614T35_ | 1.506823 | 0.59151  | 0.727267 | 0.488151 | 0.493625 | UP   | 614.4841 | 614.4835 |
| 6354 | M441T35  | 1.349866 | 0.432816 | 0.727865 | 0.488223 | 0.49365  | UP   | 441.4131 | 441.4125 |
| 6355 | M575T29_ | 1.678009 | 0.74675  | 0.727013 | 0.488232 | 0.493653 | UP   | 575.2962 | 575.296  |
| 6356 | M207T30_ | 2.878099 | -1.52512 | -0.76052 | 0.488278 | 0.493669 | DOWN | 207.0797 | 207.0795 |
| 6357 | M271T30  | 2.294417 | 1.198127 | 0.736893 | 0.488304 | 0.493677 | UP   | 270.9423 | 270.9421 |
| 6358 | M583T33  | 1.896994 | 0.923715 | 0.727984 | 0.488413 | 0.493715 | UP   | 583.1195 | 583.1192 |
| 6359 | M383T10_ | 1.455201 | 0.541218 | 0.733935 | 0.488492 | 0.493742 | UP   | 383.3468 | 383.3464 |
| 6360 | M342T31_ | 1.370196 | 0.454382 | 0.730094 | 0.488556 | 0.493763 | UP   | 342.3196 | 342.3194 |
| 6361 | M489T20  | 1.492821 | 0.578041 | 0.742403 | 0.488638 | 0.493791 | UP   | 489.2047 | 489.1951 |
| 6362 | M384T10_ | 1.728245 | 0.789308 | 0.726322 | 0.488819 | 0.493853 | UP   | 383.8122 | 383.811  |
| 6363 | M381T31_ | 1.306663 | 0.385887 | 0.734444 | 0.488929 | 0.49389  | UP   | 381.2354 | 381.2351 |
| 6364 | M415T21_ | 1.53345  | 0.616781 | 0.731123 | 0.489086 | 0.493943 | UP   | 415.2118 | 415.211  |
| 6365 | M894T34  | 1.535166 | 0.618395 | 0.725285 | 0.489155 | 0.493967 | UP   | 893.6252 | 893.6239 |
| 6366 | M1293T41 | 2.069389 | -1.0492  | -0.73436 | 0.489276 | 0.494008 | DOWN | 1292.638 | 1292.636 |
| 6367 | M206T31  | 1.400557 | 0.486    | 0.726327 | 0.489405 | 0.494052 | UP   | 206.0893 | 206.0889 |
| 6368 | M437T9_2 | 1.453771 | -0.5398  | -0.72446 | 0.489478 | 0.494077 | DOWN | 437.3404 | 437.3393 |
| 6369 | M386T16  | 1.80739  | 0.853908 | 0.726239 | 0.489555 | 0.494103 | UP   | 385.9989 | 385.9983 |
| 6370 | M453T36  | 1.522984 | 0.606901 | 0.724127 | 0.489666 | 0.49414  | UP   | 453.3616 | 453.3609 |
| 6371 | M279T31_ | 1.947665 | -0.96175 | -0.7255  | 0.489732 | 0.494163 | DOWN | 279.0658 | 279.0599 |
| 6372 | M371T9   | 3.337721 | 1.738864 | 0.755452 | 0.490376 | 0.494381 | UP   | 371.2274 | 371.2271 |
| 6373 | M256T17_ | 1.553898 | -0.63589 | -0.74723 | 0.490591 | 0.494454 | DOWN | 256.1909 | 256.1904 |
| 6374 | M531T30  | 1.617191 | -0.69349 | -0.74328 | 0.490859 | 0.494544 | DOWN | 531.2911 | 531.2903 |
| 6375 | M441T26  | 1.746052 | 0.804096 | 0.722418 | 0.490876 | 0.49455  | UP   | 441.0997 | 441.0994 |
| 6376 | M1177T9  | 2.209697 | 1.143849 | 0.727396 | 0.491046 | 0.494608 | UP   | 1176.699 | 1176.699 |
| 6377 | M924T44_ | 1.464481 | 0.55039  | 0.754317 | 0.491068 | 0.494615 | UP   | 923.5932 | 923.5925 |
| 6378 | M315T29  | 1.292231 | -0.36986 | -0.72809 | 0.49117  | 0.49465  | DOWN | 315.2167 | 315.2166 |
| 6379 | M344T18  | 1.639611 | 0.713354 | 0.721341 | 0.491256 | 0.494679 | UP   | 343.9755 | 343.9745 |
| 6380 | M247T17  | 1.362887 | 0.446666 | 0.721395 | 0.491653 | 0.494813 | UP   | 247.1655 | 247.1648 |
| 6381 | M640T33_ | 1.547693 | 0.630119 | 0.721458 | 0.491673 | 0.494819 | UP   | 640.451  | 640.45   |
| 6382 | M326T27_ | 1.616543 | 0.692912 | 0.720588 | 0.491697 | 0.494827 | UP   | 325.5881 | 325.5879 |
| 6383 | M560T26  | 1.666334 | 0.736677 | 0.723461 | 0.491804 | 0.494863 | UP   | 560.0879 | 560.0874 |
| 6384 | M266T15_ | 1.499263 | 0.584254 | 0.721008 | 0.491929 | 0.494906 | UP   | 266.2328 | 266.2323 |
| 6385 | M321T25_ | 2.007535 | 1.005425 | 0.735644 | 0.492045 | 0.494945 | UP   | 321.2638 | 321.2634 |
| 6386 | M239T14  | 1.580082 | 0.66     | 0.723261 | 0.492263 | 0.495018 | UP   | 239.0309 | 239.0305 |
| 6387 | M569T26  | 1.509367 | 0.593944 | 0.721429 | 0.492286 | 0.495026 | UP   | 569.2371 | 569.2368 |
| 6388 | M319T27  | 1.570609 | -0.65132 | -0.73772 | 0.492344 | 0.495046 | DOWN | 319.079  | 319.0784 |
| 6389 | M385T27_ | 1.754794 | 0.811302 | 0.719413 | 0.49253  | 0.495108 | UP   | 385.0371 | 385.037  |
| 6390 | M623T10_ | 1.852494 | 0.889469 | 0.723012 | 0.492539 | 0.495111 | UP   | 622.5187 | 622.5174 |
| 6391 | M469T11_ | 1.558243 | 0.63992  | 0.719074 | 0.492646 | 0.495147 | UP   | 469.3394 | 469.3379 |



|      |          |          |          |          |          |          |      |          |          |
|------|----------|----------|----------|----------|----------|----------|------|----------|----------|
| 6392 | M670T43_ | 1.131316 | 0.178001 | 0.724572 | 0.492918 | 0.495239 | UP   | 669.9569 | 669.9563 |
| 6393 | M697T10_ | 1.84064  | 0.880208 | 0.718854 | 0.49296  | 0.495253 | UP   | 696.9012 | 696.9008 |
| 6394 | M389T22_ | 1.644515 | 0.717662 | 0.718044 | 0.493272 | 0.495358 | UP   | 388.9825 | 388.982  |
| 6395 | M310T33  | 1.73673  | -0.79637 | -0.73839 | 0.493561 | 0.495455 | DOWN | 310.2072 | 310.2067 |
| 6396 | M343T31  | 1.546436 | 0.628947 | 0.721473 | 0.493726 | 0.49551  | UP   | 343.2593 | 343.2587 |
| 6397 | M878T30  | 1.373259 | 0.457604 | 0.741971 | 0.493731 | 0.495512 | UP   | 878.4034 | 878.4018 |
| 6398 | M418T26_ | 1.776506 | 0.829042 | 0.731911 | 0.493748 | 0.495517 | UP   | 418.026  | 418.0258 |
| 6399 | M282T18_ | 1.702308 | 0.767493 | 0.716998 | 0.49384  | 0.495548 | UP   | 282.4681 | 282.4679 |
| 6400 | M395T17  | 1.763106 | -0.81812 | -0.74093 | 0.494312 | 0.495707 | DOWN | 395.1277 | 395.1274 |
| 6401 | M586T29_ | 1.57184  | 0.652455 | 0.716039 | 0.494525 | 0.495778 | UP   | 586.2592 | 586.2578 |
| 6402 | M531T39  | 1.705654 | 0.770325 | 0.738967 | 0.49488  | 0.495897 | UP   | 531.3313 | 531.3309 |
| 6403 | M512T44  | 1.098177 | 0.13511  | 0.72401  | 0.494955 | 0.495922 | UP   | 512.2693 | 512.2693 |
| 6404 | M297T16  | 1.388268 | 0.473286 | 0.71499  | 0.495057 | 0.495956 | UP   | 297.1853 | 297.1845 |
| 6405 | M257T11_ | 3.490999 | 1.80364  | 0.739526 | 0.495092 | 0.495968 | UP   | 257.0347 | 257.034  |
| 6406 | M318T18_ | 1.773949 | 0.826965 | 0.719708 | 0.495114 | 0.495975 | UP   | 318.0828 | 318.0823 |
| 6407 | M294T20  | 1.835932 | -0.87651 | -0.72853 | 0.495147 | 0.495986 | DOWN | 294.2354 | 294.235  |
| 6408 | M291T24  | 1.674445 | -0.74368 | -0.7358  | 0.495364 | 0.496059 | DOWN | 291.232  | 291.2314 |
| 6409 | M341T10_ | 3.732811 | 1.900263 | 0.745596 | 0.495674 | 0.496162 | UP   | 340.7884 | 340.7825 |
| 6410 | M530T30_ | 1.616711 | -0.69306 | -0.73395 | 0.495689 | 0.496167 | DOWN | 530.2877 | 530.287  |
| 6411 | M408T37_ | 1.3263   | 0.407407 | 0.713755 | 0.495719 | 0.496177 | UP   | 408.3322 | 408.3317 |
| 6412 | M394T10_ | 1.884017 | 0.913812 | 0.719525 | 0.496036 | 0.496283 | UP   | 394.3431 | 394.3426 |
| 6413 | M198T10  | 1.455898 | 0.54191  | 0.714803 | 0.49607  | 0.496294 | UP   | 198.1491 | 198.1485 |
| 6414 | M272T32_ | 1.625092 | 0.700521 | 0.737547 | 0.496224 | 0.496346 | UP   | 271.9003 | 271.8999 |
| 6415 | M691T10_ | 1.562237 | 0.643613 | 0.714714 | 0.496406 | 0.496406 | UP   | 690.5033 | 690.502  |
| 6416 | M547T22_ | 1.438027 | 0.524091 | 0.712981 | 0.496637 | 0.496483 | UP   | 547.4667 | 547.4656 |
| 6417 | M365T9   | 2.150344 | 1.104568 | 0.717202 | 0.496674 | 0.496495 | UP   | 364.9801 | 364.9798 |
| 6418 | M1291T41 | 2.062765 | -1.04458 | -0.72195 | 0.496836 | 0.496549 | DOWN | 1290.632 | 1290.629 |
| 6419 | M435T29_ | 1.754088 | -0.81072 | -0.73649 | 0.496838 | 0.49655  | DOWN | 435.3583 | 435.3579 |
| 6420 | M760T29  | 1.295446 | -0.37345 | -0.71728 | 0.497075 | 0.496629 | DOWN | 760.1811 | 760.1773 |
| 6421 | M450T11_ | 1.970962 | 0.9789   | 0.711783 | 0.497105 | 0.496639 | UP   | 449.6976 | 449.6965 |
| 6422 | M245T17  | 1.515706 | 0.59999  | 0.711249 | 0.49718  | 0.496664 | UP   | 245.0786 | 245.078  |
| 6423 | M544T11  | 1.459142 | 0.54512  | 0.711257 | 0.497217 | 0.496676 | UP   | 544.3794 | 544.379  |
| 6424 | M452T20  | 1.510783 | -0.5953  | -0.71783 | 0.497363 | 0.496725 | DOWN | 452.3287 | 452.3278 |
| 6425 | M567T18  | 1.537654 | 0.620731 | 0.709949 | 0.497913 | 0.496907 | UP   | 567.4358 | 567.4356 |
| 6426 | M320T15  | 1.274846 | 0.350323 | 0.711067 | 0.49797  | 0.496926 | UP   | 320.2223 | 320.2216 |
| 6427 | M398T18  | 1.563883 | -0.64513 | -0.7217  | 0.498029 | 0.496946 | DOWN | 397.9887 | 397.9881 |
| 6428 | M281T16_ | 1.676008 | 0.745029 | 0.710682 | 0.498171 | 0.496993 | UP   | 281.0951 | 281.0945 |
| 6429 | M739T32  | 1.704915 | 0.769699 | 0.726256 | 0.498254 | 0.49702  | UP   | 739.1962 | 739.1957 |
| 6430 | M358T25  | 1.769779 | -0.82357 | -0.72542 | 0.498276 | 0.497028 | DOWN | 358.2953 | 358.295  |
| 6431 | M523T29  | 1.861757 | -0.89666 | -0.73165 | 0.498383 | 0.497063 | DOWN | 523.1053 | 523.1052 |
| 6432 | M405T29  | 1.412936 | 0.498696 | 0.709121 | 0.498475 | 0.497093 | UP   | 405.3009 | 405.3005 |
| 6433 | M498T18_ | 1.747558 | 0.805341 | 0.709088 | 0.498497 | 0.497101 | UP   | 498.1245 | 498.1243 |
| 6434 | M306T23_ | 1.566944 | 0.647954 | 0.708961 | 0.49852  | 0.497108 | UP   | 305.7364 | 305.7364 |
| 6435 | M552T18_ | 1.745236 | 0.803422 | 0.708916 | 0.498702 | 0.497169 | UP   | 552.062  | 552.0613 |
| 6436 | M1292T41 | 2.080393 | -1.05686 | -0.71895 | 0.498764 | 0.497189 | DOWN | 1291.635 | 1291.633 |
| 6437 | M281T32  | 1.576307 | -0.65655 | -0.71524 | 0.499016 | 0.497273 | DOWN | 280.6548 | 280.6544 |
| 6438 | M315T14  | 1.446313 | 0.53238  | 0.710633 | 0.499145 | 0.497315 | UP   | 315.1958 | 315.195  |

|      |          |          |          |          |          |          |      |          |          |
|------|----------|----------|----------|----------|----------|----------|------|----------|----------|
| 6439 | M1065T29 | 2.744327 | -1.45645 | -0.72957 | 0.499261 | 0.497354 | DOWN | 1064.677 | 1064.675 |
| 6440 | M750T29  | 1.530662 | 0.614156 | 0.707331 | 0.499463 | 0.49742  | UP   | 749.5461 | 749.5444 |
| 6441 | M835T32  | 1.458505 | 0.544491 | 0.708975 | 0.499467 | 0.497422 | UP   | 834.5798 | 834.5791 |
| 6442 | M687T38  | 1.186161 | 0.246299 | 0.7248   | 0.499549 | 0.497449 | UP   | 686.5208 | 686.5198 |
| 6443 | M430T23_ | 1.379164 | 0.463794 | 0.711451 | 0.499552 | 0.49745  | UP   | 429.6419 | 429.6409 |
| 6444 | M486T9_2 | 2.24804  | -1.16867 | -0.73544 | 0.499576 | 0.497458 | DOWN | 486.2972 | 486.2965 |
| 6445 | M739T41_ | 1.54293  | 0.625673 | 0.714705 | 0.499876 | 0.497557 | UP   | 739.231  | 739.2297 |
| 6446 | M433T23_ | 1.581321 | 0.66113  | 0.710083 | 0.499939 | 0.497578 | UP   | 433.0007 | 432.9998 |
| 6447 | M267T26_ | 1.387203 | -0.47218 | -0.72053 | 0.500084 | 0.497626 | DOWN | 267.1029 | 267.1026 |
| 6448 | M744T31  | 1.778297 | 0.830496 | 0.716706 | 0.500591 | 0.497793 | UP   | 743.8784 | 743.8765 |
| 6449 | M289T11_ | 1.897546 | 0.924135 | 0.705506 | 0.500693 | 0.497826 | UP   | 289.1059 | 289.1052 |
| 6450 | M400T30_ | 1.445097 | 0.531167 | 0.706128 | 0.500851 | 0.497878 | UP   | 400.254  | 400.2534 |
| 6451 | M660T30  | 2.059747 | 1.042467 | 0.726302 | 0.500932 | 0.497905 | UP   | 660.2521 | 660.2516 |
| 6452 | M517T11  | 1.698434 | 0.764205 | 0.714517 | 0.501034 | 0.497939 | UP   | 517.1769 | 517.1751 |
| 6453 | M510T11  | 1.569988 | 0.650753 | 0.71811  | 0.501104 | 0.497961 | UP   | 510.1627 | 510.1621 |
| 6454 | M516T27  | 1.813356 | -0.85866 | -0.72877 | 0.501214 | 0.497998 | DOWN | 516.1291 | 516.1281 |
| 6455 | M489T22  | 1.431339 | 0.517366 | 0.711565 | 0.501427 | 0.498068 | UP   | 488.946  | 488.9458 |
| 6456 | M1136T29 | 2.540418 | -1.34507 | -0.72685 | 0.501531 | 0.498102 | DOWN | 1135.674 | 1135.674 |
| 6457 | M799T10  | 1.97656  | 0.982991 | 0.707747 | 0.501743 | 0.498172 | UP   | 798.5078 | 798.5057 |
| 6458 | M272T11  | 1.68196  | 0.750143 | 0.708753 | 0.501759 | 0.498177 | UP   | 271.6122 | 271.6114 |
| 6459 | M305T23_ | 1.46601  | 0.551895 | 0.70532  | 0.501767 | 0.498179 | UP   | 304.7407 | 304.7401 |
| 6460 | M544T23  | 2.071702 | 1.050817 | 0.720369 | 0.501969 | 0.498246 | UP   | 544.4057 | 544.4052 |
| 6461 | M524T18  | 1.559315 | -0.64091 | -0.70984 | 0.502021 | 0.498263 | DOWN | 524.3329 | 524.3323 |
| 6462 | M332T40  | 1.22549  | -0.29336 | -0.7069  | 0.502115 | 0.498294 | DOWN | 332.2798 | 332.2795 |
| 6463 | M556T27_ | 1.579072 | 0.659077 | 0.703047 | 0.502149 | 0.498305 | UP   | 556.0723 | 556.0717 |
| 6464 | M285T20_ | 1.431985 | 0.518017 | 0.711877 | 0.502207 | 0.498324 | UP   | 285.2906 | 285.29   |
| 6465 | M331T16  | 1.360072 | 0.443683 | 0.703065 | 0.502325 | 0.498363 | UP   | 331.1908 | 331.1902 |
| 6466 | M810T23  | 2.305391 | -1.20501 | -0.72775 | 0.502332 | 0.498365 | DOWN | 810.3135 | 810.3131 |
| 6467 | M724T41  | 1.358515 | -0.44203 | -0.70509 | 0.50257  | 0.498443 | DOWN | 724.4112 | 724.4097 |
| 6468 | M395T32_ | 1.421197 | 0.507107 | 0.706587 | 0.502581 | 0.498446 | UP   | 395.3199 | 395.3196 |
| 6469 | M469T43  | 1.068285 | -0.0953  | -0.70221 | 0.502592 | 0.49845  | DOWN | 468.9973 | 468.9965 |
| 6470 | M212T11_ | 1.448776 | 0.534834 | 0.70252  | 0.502613 | 0.498457 | UP   | 212.1647 | 212.1642 |
| 6471 | M613T27  | 1.525879 | 0.609641 | 0.704361 | 0.502678 | 0.498478 | UP   | 613.1305 | 613.1299 |
| 6472 | M711T10_ | 1.574873 | 0.655236 | 0.714399 | 0.502887 | 0.498547 | UP   | 710.9716 | 710.9692 |
| 6473 | M301T26  | 1.633117 | -0.70763 | -0.7229  | 0.502917 | 0.498556 | DOWN | 301.2013 | 301.2009 |
| 6474 | M317T19  | 1.456246 | 0.542254 | 0.70278  | 0.503011 | 0.498587 | UP   | 317.2049 | 317.2042 |
| 6475 | M435T26_ | 1.539839 | 0.62278  | 0.704441 | 0.50303  | 0.498594 | UP   | 435.1732 | 435.1727 |
| 6476 | M697T7   | 2.671278 | 1.41753  | 0.718383 | 0.503086 | 0.498612 | UP   | 696.5393 | 696.5378 |
| 6477 | M879T21  | 1.666578 | 0.736888 | 0.706338 | 0.503274 | 0.498673 | UP   | 878.607  | 878.6049 |
| 6478 | M631T11_ | 1.648094 | 0.720799 | 0.701169 | 0.503363 | 0.498702 | UP   | 631.0973 | 631.0962 |
| 6479 | M234T12  | 1.612525 | 0.689321 | 0.700759 | 0.503517 | 0.498753 | UP   | 234.1142 | 234.1139 |
| 6480 | M279T31_ | 3.333313 | 1.736957 | 0.722581 | 0.503541 | 0.498761 | UP   | 279.1881 | 279.1781 |
| 6481 | M514T22  | 1.842288 | -0.8815  | -0.72465 | 0.503544 | 0.498762 | DOWN | 514.1398 | 514.1393 |
| 6482 | M604T11  | 1.793238 | 0.842567 | 0.702742 | 0.503549 | 0.498763 | UP   | 604.0952 | 604.0924 |
| 6483 | M296T27  | 1.555545 | 0.63742  | 0.70163  | 0.503633 | 0.498791 | UP   | 296.136  | 296.1358 |
| 6484 | M703T35_ | 1.600633 | 0.678642 | 0.700087 | 0.503728 | 0.498822 | UP   | 702.5007 | 702.4992 |
| 6485 | M432T15  | 1.504123 | 0.588923 | 0.700789 | 0.503922 | 0.498885 | UP   | 432.202  | 432.2012 |

|      |          |          |          |          |          |          |      |          |          |
|------|----------|----------|----------|----------|----------|----------|------|----------|----------|
| 6486 | M520T16  | 1.755324 | 0.811737 | 0.700743 | 0.504021 | 0.498917 | UP   | 520.236  | 520.2357 |
| 6487 | M461T23_ | 1.336542 | -0.41851 | -0.70424 | 0.504138 | 0.498956 | DOWN | 461.2728 | 461.2719 |
| 6488 | M294T18_ | 1.193373 | 0.255046 | 0.700231 | 0.504203 | 0.498977 | UP   | 294.2277 | 294.2272 |
| 6489 | M195T17  | 1.42923  | -0.51524 | -0.72493 | 0.504312 | 0.499012 | DOWN | 195.138  | 195.1375 |
| 6490 | M402T10_ | 1.961568 | 0.972007 | 0.713889 | 0.504552 | 0.499091 | UP   | 402.2867 | 402.2802 |
| 6491 | M432T22_ | 1.553523 | 0.635544 | 0.707863 | 0.504619 | 0.499112 | UP   | 432.2385 | 432.2375 |
| 6492 | M394T11  | 2.757027 | -1.46311 | -0.72804 | 0.504735 | 0.49915  | DOWN | 394.2225 | 394.2129 |
| 6493 | M572T16  | 1.838111 | 0.878224 | 0.698575 | 0.504878 | 0.499197 | UP   | 572.0671 | 572.0668 |
| 6494 | M244T21_ | 1.598753 | -0.67695 | -0.71474 | 0.50496  | 0.499223 | DOWN | 244.2275 | 244.227  |
| 6495 | M624T43_ | 1.332699 | 0.414351 | 0.727307 | 0.505359 | 0.499354 | UP   | 624.2624 | 624.262  |
| 6496 | M345T16_ | 1.384367 | 0.469226 | 0.69774  | 0.505394 | 0.499365 | UP   | 345.1812 | 345.1804 |
| 6497 | M763T10_ | 1.678111 | 0.746838 | 0.697083 | 0.5055   | 0.499399 | UP   | 762.9409 | 762.9407 |
| 6498 | M786T10  | 1.882693 | 0.912798 | 0.697126 | 0.505524 | 0.499407 | UP   | 786.1952 | 786.1947 |
| 6499 | M286T13  | 1.651252 | 0.723561 | 0.706673 | 0.505558 | 0.499418 | UP   | 285.9122 | 285.9118 |
| 6500 | M295T32  | 1.936919 | -0.95376 | -0.72143 | 0.505748 | 0.49948  | DOWN | 295.1881 | 295.1876 |
| 6501 | M397T30_ | 1.502398 | 0.587267 | 0.698396 | 0.505775 | 0.499489 | UP   | 397.4052 | 397.4048 |
| 6502 | M455T10_ | 1.612358 | 0.689172 | 0.698285 | 0.505821 | 0.499504 | UP   | 455.3309 | 455.33   |
| 6503 | M283T15  | 1.473275 | 0.559027 | 0.696685 | 0.505838 | 0.499509 | UP   | 283.2829 | 283.2828 |
| 6504 | M897T26  | 1.799337 | -0.84747 | -0.72023 | 0.50592  | 0.499536 | DOWN | 897.4174 | 897.4153 |
| 6505 | M328T28  | 1.520453 | -0.6045  | -0.71786 | 0.506055 | 0.49958  | DOWN | 328.2121 | 328.2119 |
| 6506 | M1112T29 | 2.261974 | -1.17758 | -0.7174  | 0.506385 | 0.499687 | DOWN | 1111.674 | 1111.673 |
| 6507 | M565T29_ | 1.619888 | -0.69589 | -0.71737 | 0.506458 | 0.49971  | DOWN | 565.4208 | 565.42   |
| 6508 | M743T29  | 1.671726 | 0.741339 | 0.696183 | 0.506511 | 0.499728 | UP   | 743.1946 | 743.1932 |
| 6509 | M311T10  | 1.667213 | 0.737438 | 0.695499 | 0.506732 | 0.499799 | UP   | 310.7594 | 310.7585 |
| 6510 | M371T22  | 1.79315  | -0.8425  | -0.7156  | 0.506807 | 0.499824 | DOWN | 371.1889 | 371.1882 |
| 6511 | M425T18_ | 1.576102 | 0.656361 | 0.695462 | 0.506912 | 0.499857 | UP   | 425.0303 | 425.0297 |
| 6512 | M437T17  | 1.701193 | 0.766547 | 0.69553  | 0.506944 | 0.499868 | UP   | 437.1624 | 437.1624 |
| 6513 | M456T15  | 1.568062 | 0.648983 | 0.695491 | 0.506992 | 0.499883 | UP   | 456.1938 | 456.1931 |
| 6514 | M301T18_ | 1.303653 | 0.38256  | 0.698994 | 0.507026 | 0.499894 | UP   | 301.2169 | 301.2167 |
| 6515 | M843T30  | 1.10433  | 0.143172 | 0.704819 | 0.507452 | 0.500032 | UP   | 842.575  | 842.5741 |
| 6516 | M775T23  | 2.108032 | -1.0759  | -0.71441 | 0.507483 | 0.500042 | DOWN | 775.1868 | 775.186  |
| 6517 | M518T27_ | 1.470994 | -0.55679 | -0.708   | 0.50762  | 0.500087 | DOWN | 518.3242 | 518.3234 |
| 6518 | M352T17_ | 1.724444 | -0.78613 | -0.71594 | 0.508089 | 0.500238 | DOWN | 352.1056 | 352.1054 |
| 6519 | M736T29_ | 1.700013 | 0.765546 | 0.719117 | 0.50809  | 0.500238 | UP   | 736.2109 | 736.2108 |
| 6520 | M287T33  | 1.404735 | 0.490298 | 0.692879 | 0.508158 | 0.500261 | UP   | 287.222  | 287.2213 |
| 6521 | M538T43_ | 1.638392 | 0.712281 | 0.715989 | 0.508525 | 0.500379 | UP   | 538.3207 | 538.3196 |
| 6522 | M255T17_ | 1.50045  | -0.58539 | -0.71623 | 0.508634 | 0.500414 | DOWN | 255.1593 | 255.1587 |
| 6523 | M349T27_ | 1.577237 | 0.657399 | 0.693776 | 0.508638 | 0.500415 | UP   | 349.1102 | 349.1094 |
| 6524 | M342T11_ | 1.762383 | 0.817527 | 0.69177  | 0.508668 | 0.500425 | UP   | 341.6821 | 341.6816 |
| 6525 | M227T14_ | 1.591519 | 0.670404 | 0.692486 | 0.508676 | 0.500428 | UP   | 227.0559 | 227.0558 |
| 6526 | M455T9_1 | 1.546481 | 0.628989 | 0.712977 | 0.508786 | 0.500463 | UP   | 454.5949 | 454.5901 |
| 6527 | M395T19_ | 1.39065  | 0.475759 | 0.693493 | 0.509027 | 0.500541 | UP   | 395.3177 | 395.317  |
| 6528 | M183T21_ | 1.996732 | 0.997641 | 0.699552 | 0.509432 | 0.500671 | UP   | 183.0361 | 183.0358 |
| 6529 | M554T30  | 1.582061 | -0.66181 | -0.70759 | 0.509759 | 0.500776 | DOWN | 554.2877 | 554.2874 |
| 6530 | M555T20  | 1.488824 | 0.574174 | 0.689419 | 0.510058 | 0.500872 | UP   | 555.3211 | 555.3203 |
| 6531 | M570T30_ | 1.376555 | -0.46106 | -0.70294 | 0.510129 | 0.500895 | DOWN | 569.5003 | 569.4994 |
| 6532 | M352T35  | 1.510318 | 0.594852 | 0.689248 | 0.510189 | 0.500915 | UP   | 352.3058 | 352.3057 |

|      |          |          |          |          |          |          |      |          |          |
|------|----------|----------|----------|----------|----------|----------|------|----------|----------|
| 6533 | M351T20  | 1.551748 | 0.633894 | 0.696754 | 0.510268 | 0.50094  | UP   | 351.2588 | 351.258  |
| 6534 | M331T26_ | 1.487428 | 0.57282  | 0.689491 | 0.510316 | 0.500955 | UP   | 331.1571 | 331.1569 |
| 6535 | M356T22_ | 1.593702 | 0.672382 | 0.691462 | 0.510335 | 0.500961 | UP   | 356.2289 | 356.2285 |
| 6536 | M559T24  | 1.633883 | 0.708305 | 0.695913 | 0.510423 | 0.50099  | UP   | 559.0909 | 559.0898 |
| 6537 | M289T35  | 1.284368 | -0.36106 | -0.68989 | 0.51061  | 0.501049 | DOWN | 289.2375 | 289.2373 |
| 6538 | M388T16  | 1.633682 | 0.708127 | 0.691796 | 0.510626 | 0.501055 | UP   | 387.9992 | 387.9991 |
| 6539 | M184T15  | 1.43661  | 0.522669 | 0.691219 | 0.510733 | 0.501089 | UP   | 184.1696 | 184.1695 |
| 6540 | M358T21  | 1.597517 | 0.675831 | 0.688177 | 0.51086  | 0.50113  | UP   | 358.1317 | 358.1315 |
| 6541 | M182T10_ | 1.624176 | 0.699708 | 0.699859 | 0.510957 | 0.501161 | UP   | 182.1541 | 182.1537 |
| 6542 | M283T26_ | 1.365863 | 0.449813 | 0.688386 | 0.510989 | 0.501171 | UP   | 283.1311 | 283.1309 |
| 6543 | M151T26  | 1.377375 | 0.461921 | 0.692372 | 0.511013 | 0.501179 | UP   | 151.0754 | 151.0751 |
| 6544 | M333T10_ | 2.038755 | 1.027688 | 0.696553 | 0.511182 | 0.501233 | UP   | 333.266  | 333.2654 |
| 6545 | M358T30  | 1.353351 | 0.436536 | 0.698498 | 0.511368 | 0.501292 | UP   | 358.2016 | 358.2009 |
| 6546 | M313T23_ | 1.563512 | 0.64479  | 0.692396 | 0.51142  | 0.501309 | UP   | 312.9796 | 312.9788 |
| 6547 | M292T10  | 1.473203 | 0.558956 | 0.689426 | 0.511511 | 0.501338 | UP   | 292.1546 | 292.1542 |
| 6548 | M167T21  | 1.385857 | 0.470778 | 0.686551 | 0.5118   | 0.501431 | UP   | 167.0703 | 167.07   |
| 6549 | M517T32  | 1.628452 | 0.703501 | 0.707167 | 0.511851 | 0.501447 | UP   | 516.9752 | 516.975  |
| 6550 | M465T31  | 1.768744 | 0.822726 | 0.69391  | 0.511895 | 0.501461 | UP   | 464.6715 | 464.6713 |
| 6551 | M433T22_ | 1.60215  | 0.680009 | 0.698211 | 0.511939 | 0.501475 | UP   | 433.2418 | 433.2408 |
| 6552 | M583T22  | 2.041862 | -1.02989 | -0.70963 | 0.512052 | 0.501511 | DOWN | 583.2392 | 583.2387 |
| 6553 | M332T23_ | 1.342207 | 0.424607 | 0.68744  | 0.512143 | 0.50154  | UP   | 332.316  | 332.3158 |
| 6554 | M482T20  | 2.244925 | -1.16667 | -0.71147 | 0.512286 | 0.501586 | DOWN | 482.0201 | 482.0195 |
| 6555 | M542T33  | 1.827999 | 0.870265 | 0.687871 | 0.512599 | 0.501686 | UP   | 542.0926 | 542.0925 |
| 6556 | M400T10_ | 1.442085 | 0.528156 | 0.685778 | 0.51261  | 0.50169  | UP   | 400.4017 | 400.4003 |
| 6557 | M593T10_ | 1.662952 | 0.733747 | 0.685126 | 0.512624 | 0.501694 | UP   | 592.8925 | 592.8908 |
| 6558 | M279T27_ | 1.151966 | -0.2041  | -0.68574 | 0.512662 | 0.501706 | DOWN | 279.1593 | 279.1592 |
| 6559 | M325T11  | 1.582045 | 0.661791 | 0.695778 | 0.512709 | 0.501721 | UP   | 325.1913 | 325.1909 |
| 6560 | M349T10_ | 2.101208 | 1.071219 | 0.695709 | 0.512932 | 0.501792 | UP   | 348.5138 | 348.513  |
| 6561 | M297T32_ | 1.517499 | 0.601695 | 0.710376 | 0.512982 | 0.501808 | UP   | 297.1344 | 297.134  |
| 6562 | M541T36  | 1.267454 | 0.341934 | 0.685542 | 0.512987 | 0.50181  | UP   | 541.4293 | 541.4283 |
| 6563 | M511T30  | 1.516715 | -0.60095 | -0.68665 | 0.513462 | 0.501961 | DOWN | 511.1648 | 511.1642 |
| 6564 | M302T25  | 2.067249 | -1.04771 | -0.70989 | 0.513689 | 0.502033 | DOWN | 302.269  | 302.2686 |
| 6565 | M820T11  | 1.674426 | 0.743666 | 0.682937 | 0.51395  | 0.502116 | UP   | 819.5587 | 819.5565 |
| 6566 | M389T31_ | 1.63163  | -0.70631 | -0.70067 | 0.514037 | 0.502144 | DOWN | 389.2686 | 389.2682 |
| 6567 | M273T28  | 1.502704 | 0.587561 | 0.699585 | 0.514054 | 0.502149 | UP   | 273.2981 | 273.2977 |
| 6568 | M217T7   | 1.791338 | 0.841038 | 0.705034 | 0.514079 | 0.502157 | UP   | 217.1046 | 217.1044 |
| 6569 | M658T41_ | 1.404021 | -0.48956 | -0.685   | 0.514323 | 0.502235 | DOWN | 658.3433 | 658.3424 |
| 6570 | M341T11_ | 1.730689 | 0.791347 | 0.682403 | 0.51433  | 0.502237 | UP   | 341.1804 | 341.1796 |
| 6571 | M491T9_2 | 1.477169 | -0.56283 | -0.69207 | 0.514417 | 0.502265 | DOWN | 491.2988 | 491.2977 |
| 6572 | M417T45  | 1.107989 | -0.14794 | -0.6822  | 0.514426 | 0.502268 | DOWN | 416.8212 | 416.8209 |
| 6573 | M570T32_ | 1.464253 | 0.550165 | 0.682533 | 0.514426 | 0.502268 | UP   | 570.4215 | 570.4204 |
| 6574 | M394T19_ | 1.359614 | 0.443198 | 0.68563  | 0.514442 | 0.502273 | UP   | 394.3145 | 394.3138 |
| 6575 | M541T11_ | 2.003122 | 1.00225  | 0.682724 | 0.51484  | 0.502399 | UP   | 541.1566 | 541.1545 |
| 6576 | M498T11_ | 1.995191 | 0.996527 | 0.682356 | 0.515161 | 0.502501 | UP   | 498.1245 | 498.1239 |
| 6577 | M576T29  | 1.847955 | -0.88593 | -0.71099 | 0.515292 | 0.502542 | DOWN | 576.2936 | 576.2934 |
| 6578 | M475T23  | 1.583703 | 0.663302 | 0.682607 | 0.515449 | 0.502592 | UP   | 475.0307 | 475.0301 |
| 6579 | M919T31  | 1.399227 | 0.48463  | 0.68559  | 0.51561  | 0.502643 | UP   | 918.601  | 918.5999 |

|      |          |          |          |          |          |          |      |          |          |
|------|----------|----------|----------|----------|----------|----------|------|----------|----------|
| 6580 | M531T17  | 1.814806 | 0.859815 | 0.681782 | 0.515669 | 0.502662 | UP   | 530.8399 | 530.8398 |
| 6581 | M317T20_ | 1.77623  | -0.82882 | -0.69664 | 0.515733 | 0.502682 | DOWN | 317.1362 | 317.1355 |
| 6582 | M651T11_ | 1.691186 | 0.758036 | 0.687633 | 0.515802 | 0.502704 | UP   | 651.1036 | 651.1032 |
| 6583 | M605T23  | 1.854799 | -0.89126 | -0.69778 | 0.515948 | 0.50275  | DOWN | 605.1475 | 605.1472 |
| 6584 | M511T9   | 1.96507  | 0.974581 | 0.698528 | 0.516004 | 0.502768 | UP   | 511.4091 | 511.4073 |
| 6585 | M430T15  | 1.65611  | 0.727798 | 0.68189  | 0.516186 | 0.502825 | UP   | 430.1679 | 430.1675 |
| 6586 | M243T24  | 1.908852 | -0.93271 | -0.70287 | 0.516294 | 0.502859 | DOWN | 243.2318 | 243.2311 |
| 6587 | M285T16_ | 1.55283  | 0.6349   | 0.678949 | 0.516348 | 0.502876 | UP   | 285.2539 | 285.2533 |
| 6588 | M572T27  | 1.538866 | 0.621868 | 0.679254 | 0.516447 | 0.502908 | UP   | 572.2441 | 572.2436 |
| 6589 | M741T41  | 1.562581 | 0.643931 | 0.691512 | 0.516584 | 0.502951 | UP   | 741.2262 | 741.2255 |
| 6590 | M187T30  | 2.909439 | -1.54074 | -0.70886 | 0.516641 | 0.502969 | DOWN | 186.5664 | 186.5662 |
| 6591 | M1116T11 | 1.758527 | 0.814367 | 0.682137 | 0.516669 | 0.502978 | UP   | 1115.604 | 1115.601 |
| 6592 | M527T32_ | 1.466971 | 0.55284  | 0.679473 | 0.516744 | 0.503002 | UP   | 527.3984 | 527.3976 |
| 6593 | M530T11  | 1.386332 | 0.471273 | 0.678158 | 0.516815 | 0.503024 | UP   | 530.3806 | 530.3796 |
| 6594 | M402T29  | 1.421296 | -0.50721 | -0.6826  | 0.516821 | 0.503026 | DOWN | 402.2906 | 402.2904 |
| 6595 | M717T9_1 | 1.552573 | 0.634662 | 0.678169 | 0.517064 | 0.503102 | UP   | 717.4691 | 717.4668 |
| 6596 | M685T9_2 | 1.825857 | -0.86857 | -0.68899 | 0.517269 | 0.503167 | DOWN | 685.3908 | 685.3893 |
| 6597 | M318T19  | 1.459646 | 0.545618 | 0.678383 | 0.517289 | 0.503173 | UP   | 318.2082 | 318.2074 |
| 6598 | M368T18_ | 1.418235 | -0.5041  | -0.70771 | 0.517303 | 0.503178 | DOWN | 368.2117 | 368.2111 |
| 6599 | M340T13  | 2.037102 | 1.026518 | 0.683344 | 0.51736  | 0.503196 | UP   | 340.1405 | 340.1402 |
| 6600 | M595T9   | 1.684722 | 0.752511 | 0.679448 | 0.517517 | 0.503245 | UP   | 594.8919 | 594.8905 |
| 6601 | M468T20_ | 1.754316 | -0.81091 | -0.69281 | 0.517545 | 0.503254 | DOWN | 468.3683 | 468.3681 |
| 6602 | M552T13  | 1.536949 | 0.62007  | 0.676783 | 0.517641 | 0.503284 | UP   | 552.4168 | 552.4146 |
| 6603 | M746T21  | 1.527216 | 0.610904 | 0.679606 | 0.517643 | 0.503285 | UP   | 745.5334 | 745.5313 |
| 6604 | M315T15  | 1.434048 | 0.520093 | 0.680824 | 0.518109 | 0.503431 | UP   | 315.1959 | 315.1954 |
| 6605 | M212T15  | 1.411871 | 0.497608 | 0.680076 | 0.518161 | 0.503448 | UP   | 212.1646 | 212.1643 |
| 6606 | M396T20  | 1.831794 | -0.87326 | -0.70417 | 0.51817  | 0.503451 | DOWN | 396.1302 | 396.13   |
| 6607 | M472T20_ | 1.572176 | -0.65276 | -0.6786  | 0.518191 | 0.503457 | DOWN | 472.3037 | 472.3025 |
| 6608 | M680T31  | 1.356341 | -0.43972 | -0.68219 | 0.518246 | 0.503475 | DOWN | 680.2169 | 680.2167 |
| 6609 | M269T31_ | 1.290942 | 0.368424 | 0.676474 | 0.518313 | 0.503496 | UP   | 269.2477 | 269.2473 |
| 6610 | M412T23_ | 1.705375 | -0.77009 | -0.70038 | 0.518328 | 0.5035   | DOWN | 412.2331 | 412.2326 |
| 6611 | M312T23_ | 1.976762 | -0.98314 | -0.69827 | 0.518412 | 0.503527 | DOWN | 312.1614 | 312.1609 |
| 6612 | M624T11_ | 1.534507 | 0.617776 | 0.681738 | 0.518457 | 0.503541 | UP   | 623.8895 | 623.8885 |
| 6613 | M310T17_ | 1.388081 | 0.473092 | 0.677722 | 0.518597 | 0.503585 | UP   | 310.2435 | 310.2427 |
| 6614 | M334T9   | 1.706842 | -0.77133 | -0.68567 | 0.519003 | 0.503712 | DOWN | 334.4786 | 334.4784 |
| 6615 | M660T43  | 1.137058 | 0.185306 | 0.685286 | 0.519175 | 0.503766 | UP   | 659.9693 | 659.9679 |
| 6616 | M239T17  | 1.474923 | -0.56064 | -0.69779 | 0.519341 | 0.503818 | DOWN | 239.1643 | 239.164  |
| 6617 | M337T24_ | 1.802741 | -0.85019 | -0.69726 | 0.519438 | 0.503849 | DOWN | 337.1048 | 337.1041 |
| 6618 | M782T10_ | 1.952453 | 0.965288 | 0.673764 | 0.519475 | 0.50386  | UP   | 782.1504 | 782.1495 |
| 6619 | M849T37  | 1.161567 | 0.216072 | 0.685147 | 0.519621 | 0.503906 | UP   | 848.5946 | 848.5944 |
| 6620 | M854T11  | 1.553862 | 0.635858 | 0.675754 | 0.519626 | 0.503908 | UP   | 853.6028 | 853.602  |
| 6621 | M385T18_ | 1.581014 | 0.66085  | 0.67371  | 0.519678 | 0.503924 | UP   | 385.0023 | 385.0017 |
| 6622 | M351T9_1 | 1.676924 | -0.74582 | -0.68577 | 0.519786 | 0.503958 | DOWN | 350.7085 | 350.7083 |
| 6623 | M791T32  | 1.448819 | 0.534878 | 0.673753 | 0.519882 | 0.503988 | UP   | 790.5534 | 790.5519 |
| 6624 | M688T31_ | 1.760674 | 0.816128 | 0.698513 | 0.520093 | 0.504054 | UP   | 688.1595 | 688.158  |
| 6625 | M515T11  | 1.637432 | 0.711435 | 0.673236 | 0.520159 | 0.504075 | UP   | 515.3536 | 515.3518 |
| 6626 | M893T34  | 1.481602 | 0.567158 | 0.673142 | 0.520242 | 0.504101 | UP   | 892.6214 | 892.6194 |

|      |          |          |          |          |          |          |      |          |          |
|------|----------|----------|----------|----------|----------|----------|------|----------|----------|
| 6627 | M555T27_ | 1.813119 | -0.85847 | -0.69059 | 0.520281 | 0.504113 | DOWN | 555.0218 | 555.0212 |
| 6628 | M459T24_ | 2.408525 | -1.26815 | -0.70066 | 0.520305 | 0.50412  | DOWN | 459.2465 | 459.2458 |
| 6629 | M842T30_ | 1.099737 | 0.137158 | 0.674012 | 0.520517 | 0.504187 | UP   | 841.5724 | 841.5712 |
| 6630 | M725T41  | 1.462133 | -0.54808 | -0.67386 | 0.520619 | 0.504218 | DOWN | 725.4145 | 725.4124 |
| 6631 | M360T22_ | 1.343706 | -0.42622 | -0.67264 | 0.520665 | 0.504233 | DOWN | 360.2439 | 360.2436 |
| 6632 | M249T22_ | 1.603367 | -0.6811  | -0.68817 | 0.520678 | 0.504237 | DOWN | 249.1827 | 249.1826 |
| 6633 | M416T21_ | 1.531499 | 0.614944 | 0.678783 | 0.520771 | 0.504266 | UP   | 416.2152 | 416.2143 |
| 6634 | M344T29  | 1.394173 | 0.479409 | 0.671544 | 0.52079  | 0.504272 | UP   | 344.1575 | 344.157  |
| 6635 | M317T26_ | 1.793903 | -0.8431  | -0.6929  | 0.521164 | 0.504389 | DOWN | 317.2306 | 317.2301 |
| 6636 | M393T19_ | 1.349081 | 0.431977 | 0.673891 | 0.521642 | 0.504538 | UP   | 393.3112 | 393.3104 |
| 6637 | M275T29  | 1.445521 | 0.53159  | 0.671939 | 0.52179  | 0.504584 | UP   | 275.2371 | 275.2368 |
| 6638 | M594T9_1 | 1.944783 | 0.959609 | 0.674751 | 0.521838 | 0.504599 | UP   | 593.8906 | 593.8899 |
| 6639 | M376T19  | 1.3743   | 0.458697 | 0.672462 | 0.521867 | 0.504608 | UP   | 376.3043 | 376.3034 |
| 6640 | M480T31  | 1.386736 | -0.47169 | -0.67198 | 0.521935 | 0.504629 | DOWN | 480.3088 | 480.3082 |
| 6641 | M699T10_ | 1.885395 | -0.91487 | -0.68426 | 0.522107 | 0.504683 | DOWN | 698.9684 | 698.9674 |
| 6642 | M334T19_ | 1.50679  | 0.591479 | 0.668816 | 0.522467 | 0.504795 | UP   | 334.2744 | 334.2742 |
| 6643 | M207T25  | 1.422814 | -0.50875 | -0.67672 | 0.522505 | 0.504806 | DOWN | 207.1857 | 207.1854 |
| 6644 | M411T10_ | 1.574767 | -0.65514 | -0.68394 | 0.5226   | 0.504836 | DOWN | 411.2372 | 411.2368 |
| 6645 | M433T34_ | 1.535642 | 0.618842 | 0.668295 | 0.522791 | 0.504895 | UP   | 433.3138 | 433.3133 |
| 6646 | M1064T29 | 2.226205 | -1.15459 | -0.68844 | 0.523041 | 0.504973 | DOWN | 1063.675 | 1063.673 |
| 6647 | M228T22_ | 1.520775 | 0.604806 | 0.667734 | 0.523114 | 0.504996 | UP   | 228.0446 | 228.0443 |
| 6648 | M268T12  | 1.829154 | 0.871177 | 0.667471 | 0.523255 | 0.505039 | UP   | 268.0633 | 268.0566 |
| 6649 | M298T13  | 1.955059 | 0.967212 | 0.673892 | 0.523271 | 0.505044 | UP   | 298.1103 | 298.1097 |
| 6650 | M563T23_ | 1.457179 | 0.543178 | 0.67858  | 0.523611 | 0.50515  | UP   | 563.3776 | 563.3766 |
| 6651 | M375T18_ | 1.326345 | 0.407457 | 0.682675 | 0.523865 | 0.505228 | UP   | 375.0069 | 375.0065 |
| 6652 | M432T39  | 1.564548 | 0.645746 | 0.695368 | 0.52402  | 0.505277 | UP   | 432.3425 | 432.3424 |
| 6653 | M520T9   | 1.647079 | -0.71991 | -0.66636 | 0.524108 | 0.505304 | DOWN | 520.3323 | 520.3317 |
| 6654 | M307T18  | 1.463571 | 0.549493 | 0.667947 | 0.524127 | 0.50531  | UP   | 307.2483 | 307.2475 |
| 6655 | M643T17  | 1.509263 | 0.593844 | 0.671042 | 0.52415  | 0.505317 | UP   | 643.4692 | 643.4688 |
| 6656 | M314T9_2 | 1.51579  | -0.60007 | -0.67269 | 0.524361 | 0.505382 | DOWN | 314.2809 | 314.2796 |
| 6657 | M415T21_ | 1.579961 | 0.659889 | 0.667931 | 0.524533 | 0.505435 | UP   | 415.0345 | 415.0335 |
| 6658 | M437T30  | 1.504427 | -0.58921 | -0.6659  | 0.52457  | 0.505447 | DOWN | 437.2064 | 437.206  |
| 6659 | M392T13_ | 1.766777 | 0.82112  | 0.670213 | 0.524636 | 0.505467 | UP   | 391.9519 | 391.9516 |
| 6660 | M736T29_ | 2.026989 | 1.019338 | 0.695207 | 0.524767 | 0.505508 | UP   | 736.1591 | 736.1583 |
| 6661 | M1088T29 | 2.197019 | -1.13555 | -0.68398 | 0.524793 | 0.505516 | DOWN | 1087.674 | 1087.673 |
| 6662 | M929T30  | 1.120409 | 0.164026 | 0.671606 | 0.524817 | 0.505523 | UP   | 928.6218 | 928.6203 |
| 6663 | M361T9   | 2.16375  | -1.11353 | -0.69408 | 0.524853 | 0.505534 | DOWN | 360.7581 | 360.7576 |
| 6664 | M183T21_ | 2.979486 | 1.575063 | 0.693938 | 0.524895 | 0.505547 | UP   | 183.0216 | 183.0214 |
| 6665 | M507T11_ | 1.680322 | 0.748738 | 0.664751 | 0.524917 | 0.505554 | UP   | 507.1729 | 507.1712 |
| 6666 | M435T11_ | 1.837561 | 0.877792 | 0.664832 | 0.524921 | 0.505555 | UP   | 434.8764 | 434.8758 |
| 6667 | M352T22_ | 1.645494 | 0.718521 | 0.666532 | 0.524976 | 0.505572 | UP   | 352.3581 | 352.3576 |
| 6668 | M226T10  | 2.088434 | 1.062422 | 0.668928 | 0.525033 | 0.50559  | UP   | 225.6126 | 225.6124 |
| 6669 | M295T9_2 | 1.529551 | 0.613108 | 0.66604  | 0.525073 | 0.505602 | UP   | 295.1749 | 295.1744 |
| 6670 | M339T13_ | 1.91987  | 0.941009 | 0.669637 | 0.525156 | 0.505628 | UP   | 339.1369 | 339.1363 |
| 6671 | M393T20_ | 1.464851 | 0.550754 | 0.667496 | 0.525178 | 0.505635 | UP   | 393.2864 | 393.2856 |
| 6672 | M238T16  | 1.634198 | 0.708583 | 0.664762 | 0.525287 | 0.505668 | UP   | 238.073  | 238.073  |
| 6673 | M253T11  | 1.697247 | 0.763196 | 0.663971 | 0.525483 | 0.505729 | UP   | 253.0638 | 253.0632 |

|      |          |          |          |          |          |          |      |          |          |
|------|----------|----------|----------|----------|----------|----------|------|----------|----------|
| 6674 | M334T21  | 1.364408 | 0.448275 | 0.663795 | 0.525486 | 0.50573  | UP   | 334.2383 | 334.2371 |
| 6675 | M533T18_ | 1.70545  | 0.770152 | 0.663975 | 0.525488 | 0.50573  | UP   | 533.0228 | 533.0222 |
| 6676 | M350T19_ | 1.358407 | -0.44192 | -0.66591 | 0.525918 | 0.505863 | DOWN | 350.0825 | 350.0818 |
| 6677 | M342T29  | 1.471505 | 0.557292 | 0.663652 | 0.525953 | 0.505874 | UP   | 341.6094 | 341.6092 |
| 6678 | M533T31  | 1.584607 | 0.664125 | 0.666102 | 0.52597  | 0.505879 | UP   | 533.0085 | 533.0084 |
| 6679 | M562T19  | 1.493071 | 0.578283 | 0.667178 | 0.526009 | 0.505891 | UP   | 562.3745 | 562.3734 |
| 6680 | M412T24_ | 1.499065 | 0.584063 | 0.665491 | 0.526026 | 0.505896 | UP   | 412.1572 | 412.1569 |
| 6681 | M494T18_ | 2.004795 | -1.00345 | -0.67746 | 0.526043 | 0.505902 | DOWN | 494.0998 | 494.0986 |
| 6682 | M554T25  | 2.313761 | -1.21024 | -0.68908 | 0.526165 | 0.505939 | DOWN | 554.3078 | 554.307  |
| 6683 | M389T22_ | 1.422033 | 0.507955 | 0.664589 | 0.526346 | 0.505995 | UP   | 389.0226 | 389.0218 |
| 6684 | M399T22  | 1.510226 | 0.594765 | 0.665613 | 0.526634 | 0.506084 | UP   | 399.018  | 399.0173 |
| 6685 | M715T34  | 1.758696 | -0.81451 | -0.68305 | 0.526811 | 0.506138 | DOWN | 715.334  | 715.3329 |
| 6686 | M444T28  | 1.598856 | 0.67704  | 0.661503 | 0.527085 | 0.506222 | UP   | 444.0768 | 444.0765 |
| 6687 | M849T34  | 1.471089 | 0.556885 | 0.66158  | 0.527267 | 0.506278 | UP   | 848.5954 | 848.5937 |
| 6688 | M442T35_ | 1.284366 | -0.36106 | -0.66078 | 0.527327 | 0.506296 | DOWN | 442.3891 | 442.3878 |
| 6689 | M464T44  | 1.194767 | -0.25673 | -0.66945 | 0.527341 | 0.506301 | DOWN | 464.2489 | 464.2483 |
| 6690 | M373T34  | 1.79128  | -0.84099 | -0.6787  | 0.527648 | 0.506395 | DOWN | 373.2931 | 373.2927 |
| 6691 | M191T12  | 1.356703 | 0.440105 | 0.660941 | 0.52768  | 0.506405 | UP   | 191.1642 | 191.164  |
| 6692 | M313T17  | 1.62365  | 0.699241 | 0.6621   | 0.527749 | 0.506426 | UP   | 312.9797 | 312.979  |
| 6693 | M392T12  | 1.405843 | 0.491435 | 0.660049 | 0.527774 | 0.506434 | UP   | 392.2072 | 392.2063 |
| 6694 | M418T40  | 1.464668 | 0.550574 | 0.659969 | 0.52783  | 0.506451 | UP   | 418.3165 | 418.3157 |
| 6695 | M811T24  | 1.701957 | -0.76719 | -0.67713 | 0.52796  | 0.506491 | DOWN | 811.3799 | 811.3785 |
| 6696 | M1089T29 | 2.101969 | -1.07174 | -0.67812 | 0.52811  | 0.506537 | DOWN | 1088.678 | 1088.676 |
| 6697 | M614T32  | 1.451466 | 0.537511 | 0.659795 | 0.528258 | 0.506582 | UP   | 614.4481 | 614.4468 |
| 6698 | M342T18  | 1.471785 | 0.557567 | 0.659734 | 0.528309 | 0.506598 | UP   | 342.3006 | 342.3005 |
| 6699 | M411T22_ | 1.754671 | -0.8112  | -0.68245 | 0.528365 | 0.506615 | DOWN | 411.0083 | 411.007  |
| 6700 | M594T11  | 1.627628 | 0.702771 | 0.660922 | 0.528654 | 0.506703 | UP   | 594.2946 | 594.2939 |
| 6701 | M234T25  | 1.706746 | -0.77125 | -0.67941 | 0.528673 | 0.506709 | DOWN | 234.2148 | 234.2144 |
| 6702 | M284T16_ | 1.429362 | -0.51537 | -0.67908 | 0.528734 | 0.506728 | DOWN | 284.1858 | 284.1852 |
| 6703 | M500T23  | 1.770588 | 0.824228 | 0.66843  | 0.528904 | 0.50678  | UP   | 500.3796 | 500.3793 |
| 6704 | M254T13_ | 1.411989 | 0.497728 | 0.659775 | 0.529019 | 0.506815 | UP   | 254.2503 | 254.2498 |
| 6705 | M494T18_ | 1.693634 | 0.760122 | 0.659643 | 0.529071 | 0.506831 | UP   | 494.2396 | 494.2395 |
| 6706 | M517T23  | 1.502617 | 0.587478 | 0.6611   | 0.529193 | 0.506868 | UP   | 517.1365 | 517.1358 |
| 6707 | M570T36_ | 1.412432 | 0.498181 | 0.658273 | 0.529195 | 0.506869 | UP   | 570.4578 | 570.4573 |
| 6708 | M406T18_ | 1.571331 | 0.651987 | 0.657534 | 0.529299 | 0.5069   | UP   | 406.1316 | 406.1305 |
| 6709 | M484T9_2 | 2.163081 | -1.11309 | -0.67962 | 0.529519 | 0.506968 | DOWN | 484.2996 | 484.2986 |
| 6710 | M170T13  | 1.44385  | 0.529921 | 0.66027  | 0.529574 | 0.506985 | UP   | 170.1652 | 170.1649 |
| 6711 | M825T31  | 1.295287 | 0.373272 | 0.663161 | 0.529795 | 0.507052 | UP   | 824.6088 | 824.6071 |
| 6712 | M390T16  | 1.577343 | 0.657497 | 0.659241 | 0.529957 | 0.507102 | UP   | 389.9944 | 389.9941 |
| 6713 | M322T19_ | 1.439012 | 0.525079 | 0.657024 | 0.53011  | 0.507148 | UP   | 322.2856 | 322.2849 |
| 6714 | M280T30  | 1.680769 | -0.74912 | -0.67379 | 0.53042  | 0.507243 | DOWN | 280.1627 | 280.1622 |
| 6715 | M549T40  | 1.591072 | -0.67    | -0.67462 | 0.530482 | 0.507261 | DOWN | 549.3038 | 549.3015 |
| 6716 | M545T11_ | 1.66512  | 0.735626 | 0.655558 | 0.530537 | 0.507278 | UP   | 545.1723 | 545.1709 |
| 6717 | M291T10  | 1.44436  | 0.530431 | 0.656871 | 0.530572 | 0.507289 | UP   | 291.1995 | 291.1986 |
| 6718 | M590T22_ | 1.641934 | 0.715396 | 0.659065 | 0.530735 | 0.507338 | UP   | 590.0526 | 590.0521 |
| 6719 | M151T22  | 1.426642 | -0.51262 | -0.67193 | 0.530769 | 0.507349 | DOWN | 151.1482 | 151.1478 |
| 6720 | M496T31_ | 1.851516 | 0.888707 | 0.681454 | 0.530962 | 0.507407 | UP   | 495.8894 | 495.8886 |

|      |           |          |          |          |          |          |      |          |          |
|------|-----------|----------|----------|----------|----------|----------|------|----------|----------|
| 6721 | M211T10   | 1.436652 | 0.52271  | 0.657618 | 0.531022 | 0.507426 | UP   | 211.1524 | 211.1517 |
| 6722 | M418T23_  | 1.313899 | 0.393855 | 0.679933 | 0.531082 | 0.507444 | UP   | 418.2492 | 418.2489 |
| 6723 | M351T9_2  | 1.693908 | -0.76036 | -0.66552 | 0.531288 | 0.507507 | DOWN | 351.2431 | 351.2428 |
| 6724 | M549T10   | 1.518599 | 0.602741 | 0.656062 | 0.531528 | 0.50758  | UP   | 549.4019 | 549.4001 |
| 6725 | M557T27   | 1.624469 | 0.699968 | 0.653865 | 0.53156  | 0.507589 | UP   | 557.0755 | 557.0747 |
| 6726 | M660T35   | 1.396981 | 0.482312 | 0.654585 | 0.531581 | 0.507596 | UP   | 659.5141 | 659.5133 |
| 6727 | M565T29_  | 1.512335 | -0.59678 | -0.66488 | 0.531603 | 0.507602 | DOWN | 565.2085 | 565.2077 |
| 6728 | M354T17   | 1.627997 | 0.703098 | 0.655187 | 0.531662 | 0.50762  | UP   | 354.0063 | 354.0054 |
| 6729 | M404T26_  | 1.250481 | 0.322483 | 0.655056 | 0.532022 | 0.50773  | UP   | 404.1388 | 404.1385 |
| 6730 | M1107T11_ | 1.624966 | 0.70041  | 0.653306 | 0.532063 | 0.507742 | UP   | 1106.614 | 1106.612 |
| 6731 | M426T16   | 1.653537 | 0.725555 | 0.653852 | 0.532106 | 0.507755 | UP   | 426.1366 | 426.136  |
| 6732 | M250T25   | 1.788317 | -0.8386  | -0.67444 | 0.532113 | 0.507757 | DOWN | 250.2377 | 250.2376 |
| 6733 | M242T21_  | 1.56349  | 0.64477  | 0.652751 | 0.532261 | 0.507802 | UP   | 242.0841 | 242.084  |
| 6734 | M450T27_  | 1.217469 | 0.283885 | 0.652514 | 0.532374 | 0.507836 | UP   | 450.1657 | 450.1652 |
| 6735 | M366T11_  | 1.614873 | 0.691421 | 0.652478 | 0.532393 | 0.507842 | UP   | 366.1366 | 366.1364 |
| 6736 | M770T29   | 1.497848 | 0.582892 | 0.660544 | 0.532501 | 0.507875 | UP   | 770.1903 | 770.19   |
| 6737 | M531T16   | 1.771226 | 0.824749 | 0.652922 | 0.532525 | 0.507882 | UP   | 531.0403 | 531.0402 |
| 6738 | M538T27   | 1.464663 | -0.55057 | -0.66343 | 0.532633 | 0.507915 | DOWN | 538.3485 | 538.348  |
| 6739 | M228T10_  | 1.717623 | 0.780413 | 0.651812 | 0.532801 | 0.507966 | UP   | 228.0957 | 228.095  |
| 6740 | M470T27   | 1.494969 | 0.580116 | 0.653082 | 0.532817 | 0.507971 | UP   | 470.1993 | 470.1988 |
| 6741 | M575T31_  | 1.500538 | -0.58548 | -0.65636 | 0.532858 | 0.507983 | DOWN | 575.267  | 575.2669 |
| 6742 | M359T25   | 1.673122 | -0.74254 | -0.66666 | 0.532965 | 0.508016 | DOWN | 359.0889 | 359.0881 |
| 6743 | M437T33_  | 1.618645 | 0.694787 | 0.652275 | 0.532975 | 0.508018 | UP   | 437.1889 | 437.1883 |
| 6744 | M277T30   | 1.198423 | -0.26114 | -0.66694 | 0.533153 | 0.508072 | DOWN | 277.216  | 277.2158 |
| 6745 | M413T23_  | 1.306737 | 0.385969 | 0.656494 | 0.53323  | 0.508096 | UP   | 412.7669 | 412.766  |
| 6746 | M362T10   | 1.601133 | -0.67909 | -0.66391 | 0.533285 | 0.508112 | DOWN | 362.2419 | 362.2413 |
| 6747 | M543T11_  | 1.371754 | 0.456022 | 0.650937 | 0.533371 | 0.508138 | UP   | 543.3754 | 543.3742 |
| 6748 | M348T35   | 1.288829 | -0.36606 | -0.66635 | 0.533527 | 0.508185 | DOWN | 348.1806 | 348.1801 |
| 6749 | M376T34   | 1.613502 | 0.690195 | 0.674448 | 0.533537 | 0.508189 | UP   | 376.3135 | 376.3127 |
| 6750 | M271T22   | 1.285373 | -0.36219 | -0.66368 | 0.53362  | 0.508214 | DOWN | 271.0869 | 271.086  |
| 6751 | M625T22_  | 1.942535 | -0.95794 | -0.67186 | 0.533666 | 0.508227 | DOWN | 625.2694 | 625.2692 |
| 6752 | M304T16   | 1.509    | 0.593593 | 0.650741 | 0.533885 | 0.508294 | UP   | 304.2638 | 304.2635 |
| 6753 | M334T17   | 1.620291 | 0.696253 | 0.656715 | 0.53389  | 0.508295 | UP   | 333.9099 | 333.9099 |
| 6754 | M530T32_  | 1.850208 | -0.88769 | -0.67078 | 0.534109 | 0.508373 | DOWN | 530.1447 | 530.1443 |
| 6755 | M291T36   | 1.157579 | 0.211111 | 0.653782 | 0.534326 | 0.50845  | UP   | 291.1957 | 291.1954 |
| 6756 | M268T14   | 1.583839 | 0.663426 | 0.651812 | 0.534824 | 0.508627 | UP   | 268.0826 | 268.0824 |
| 6757 | M658T32   | 1.447738 | 0.5338   | 0.649081 | 0.534844 | 0.508634 | UP   | 658.4744 | 658.4731 |
| 6758 | M543T22_  | 1.942218 | -0.9577  | -0.65621 | 0.534967 | 0.508678 | DOWN | 543.1383 | 543.1378 |
| 6759 | M546T22_  | 1.400558 | 0.486002 | 0.647947 | 0.535357 | 0.508817 | UP   | 546.4635 | 546.4633 |
| 6760 | M415T24_  | 1.559919 | -0.64147 | -0.66682 | 0.535479 | 0.50886  | DOWN | 415.2114 | 415.2108 |
| 6761 | M558T17   | 1.370929 | 0.455153 | 0.655483 | 0.535584 | 0.508897 | UP   | 558.4218 | 558.4216 |
| 6762 | M279T30   | 1.654724 | -0.72659 | -0.66423 | 0.536025 | 0.509053 | DOWN | 279.1594 | 279.1587 |
| 6763 | M363T31_  | 1.57094  | 0.651628 | 0.65168  | 0.536134 | 0.509092 | UP   | 362.7993 | 362.7986 |
| 6764 | M491T9_3  | 1.771486 | -0.82496 | -0.6674  | 0.536297 | 0.50915  | DOWN | 491.2991 | 491.2987 |
| 6765 | M390T18   | 1.480557 | 0.56614  | 0.648394 | 0.536526 | 0.509231 | UP   | 389.9948 | 389.9944 |
| 6766 | M852T35   | 1.286123 | -0.36303 | -0.64642 | 0.536643 | 0.509272 | DOWN | 851.6368 | 851.6351 |
| 6767 | M418T21_  | 1.624148 | 0.699683 | 0.645654 | 0.536675 | 0.509283 | UP   | 418.0335 | 418.0334 |



|      |          |          |          |          |          |          |      |          |          |
|------|----------|----------|----------|----------|----------|----------|------|----------|----------|
| 6768 | M537T43_ | 1.70604  | 0.770652 | 0.665328 | 0.536686 | 0.509287 | UP   | 537.317  | 537.316  |
| 6769 | M541T35  | 1.419215 | 0.505093 | 0.647058 | 0.536702 | 0.509293 | UP   | 541.414  | 541.4132 |
| 6770 | M672T11  | 1.638846 | 0.71268  | 0.645472 | 0.536831 | 0.509339 | UP   | 672.493  | 672.4927 |
| 6771 | M465T32  | 1.432463 | 0.518498 | 0.645193 | 0.537011 | 0.509402 | UP   | 465.3423 | 465.3417 |
| 6772 | M925T11  | 1.765264 | 0.819884 | 0.64571  | 0.537088 | 0.50943  | UP   | 925.2795 | 925.2759 |
| 6773 | M431T21_ | 1.529966 | 0.6135   | 0.659421 | 0.537221 | 0.509476 | UP   | 430.7896 | 430.7888 |
| 6774 | M287T22_ | 1.42924  | 0.515248 | 0.644562 | 0.537392 | 0.509537 | UP   | 287.0819 | 287.0818 |
| 6775 | M350T31_ | 1.578532 | 0.658583 | 0.645434 | 0.53743  | 0.50955  | UP   | 350.1059 | 350.1057 |
| 6776 | M633T35  | 1.540977 | -0.62385 | -0.6499  | 0.537535 | 0.509587 | DOWN | 633.0611 | 633.0608 |
| 6777 | M621T29  | 1.48947  | 0.574799 | 0.649051 | 0.53759  | 0.509607 | UP   | 621.2693 | 621.2688 |
| 6778 | M313T15  | 1.49613  | 0.581235 | 0.64414  | 0.537621 | 0.509617 | UP   | 313.1915 | 313.1913 |
| 6779 | M332T14  | 1.363249 | 0.447049 | 0.64534  | 0.537716 | 0.509651 | UP   | 332.2225 | 332.2223 |
| 6780 | M474T39  | 1.497326 | 0.582388 | 0.671755 | 0.537895 | 0.509714 | UP   | 474.2977 | 474.2975 |
| 6781 | M511T10  | 1.598904 | 0.677083 | 0.651955 | 0.538006 | 0.509753 | UP   | 511.1805 | 511.1665 |
| 6782 | M431T16  | 1.704674 | 0.769496 | 0.644203 | 0.538015 | 0.509757 | UP   | 431.1155 | 431.1151 |
| 6783 | M294T15_ | 1.320312 | 0.400879 | 0.64674  | 0.538167 | 0.50981  | UP   | 294.2067 | 294.2064 |
| 6784 | M329T13  | 1.587735 | 0.66697  | 0.651864 | 0.538617 | 0.509969 | UP   | 328.9358 | 328.9352 |
| 6785 | M285T20_ | 1.51625  | 0.600507 | 0.642247 | 0.538678 | 0.50999  | UP   | 285.0787 | 285.0783 |
| 6786 | M500T17  | 1.743417 | 0.801918 | 0.644742 | 0.538772 | 0.510023 | UP   | 499.9366 | 499.9358 |
| 6787 | M369T10_ | 1.601942 | 0.679822 | 0.642252 | 0.538925 | 0.510077 | UP   | 369.2708 | 369.2703 |
| 6788 | M401T40  | 1.463502 | 0.549425 | 0.64174  | 0.53901  | 0.510107 | UP   | 401.2899 | 401.2883 |
| 6789 | M426T33  | 1.439178 | 0.525245 | 0.641833 | 0.539157 | 0.510159 | UP   | 426.3943 | 426.3937 |
| 6790 | M327T9   | 1.398428 | -0.48381 | -0.64151 | 0.539301 | 0.510209 | DOWN | 327.2841 | 327.2829 |
| 6791 | M592T29  | 1.533508 | -0.61684 | -0.64108 | 0.539403 | 0.510245 | DOWN | 592.2398 | 592.2395 |
| 6792 | M646T25_ | 1.39032  | 0.475417 | 0.643726 | 0.539527 | 0.510289 | UP   | 646.4802 | 646.4793 |
| 6793 | M526T29  | 1.464019 | -0.54993 | -0.65601 | 0.539604 | 0.510316 | DOWN | 526.2933 | 526.2927 |
| 6794 | M835T21  | 1.563219 | 0.64452  | 0.64464  | 0.539615 | 0.51032  | UP   | 834.58   | 834.5779 |
| 6795 | M602T21  | 1.477812 | 0.563463 | 0.640741 | 0.53963  | 0.510325 | UP   | 602.4119 | 602.4108 |
| 6796 | M217T20  | 1.325047 | 0.406044 | 0.642902 | 0.53965  | 0.510332 | UP   | 217.1801 | 217.1798 |
| 6797 | M496T20  | 1.381557 | 0.466295 | 0.642286 | 0.539756 | 0.510369 | UP   | 496.3632 | 496.3624 |
| 6798 | M593T9   | 1.892991 | 0.920667 | 0.643688 | 0.539864 | 0.510407 | UP   | 593.3892 | 593.3886 |
| 6799 | M431T23  | 1.544727 | 0.627351 | 0.644268 | 0.539926 | 0.510429 | UP   | 431.0054 | 431.0049 |
| 6800 | M280T36  | 1.560041 | -0.64158 | -0.65987 | 0.540223 | 0.510533 | DOWN | 280.2636 | 280.2632 |
| 6801 | M239T25  | 1.227695 | -0.29595 | -0.64796 | 0.540433 | 0.510607 | DOWN | 239.128  | 239.1277 |
| 6802 | M433T15_ | 1.650328 | 0.722753 | 0.640051 | 0.54071  | 0.510704 | UP   | 433.1312 | 433.1305 |
| 6803 | M385T28_ | 1.527468 | 0.611143 | 0.639467 | 0.540872 | 0.510761 | UP   | 384.5563 | 384.5556 |
| 6804 | M514T21  | 1.430062 | 0.516078 | 0.639413 | 0.540898 | 0.51077  | UP   | 514.3593 | 514.3586 |
| 6805 | M719T7   | 1.83993  | 0.879651 | 0.654327 | 0.541259 | 0.510896 | UP   | 718.521  | 718.5199 |
| 6806 | M407T10_ | 1.585312 | 0.664767 | 0.641831 | 0.541687 | 0.511046 | UP   | 406.8392 | 406.8325 |
| 6807 | M665T22  | 1.880392 | -0.91103 | -0.65794 | 0.541933 | 0.511132 | DOWN | 665.2929 | 665.2924 |
| 6808 | M398T37  | 1.294244 | -0.37211 | -0.64992 | 0.541974 | 0.511146 | DOWN | 398.1655 | 398.1655 |
| 6809 | M209T9   | 1.433063 | -0.5191  | -0.63784 | 0.542037 | 0.511168 | DOWN | 209.1648 | 209.1644 |
| 6810 | M519T43_ | 1.168012 | 0.224055 | 0.636454 | 0.542264 | 0.511247 | UP   | 519.1386 | 519.1377 |
| 6811 | M505T29_ | 1.44536  | -0.53143 | -0.64092 | 0.542279 | 0.511253 | DOWN | 505.3136 | 505.3133 |
| 6812 | M242T23_ | 1.567004 | -0.64801 | -0.65262 | 0.542287 | 0.511255 | DOWN | 242.053  | 242.0524 |
| 6813 | M631T17  | 1.81577  | 0.860582 | 0.636626 | 0.542288 | 0.511256 | UP   | 630.7646 | 630.764  |
| 6814 | M725T31_ | 1.640997 | 0.714573 | 0.654054 | 0.542337 | 0.511273 | UP   | 724.5921 | 724.5915 |

|      |          |          |          |          |          |          |      |          |          |
|------|----------|----------|----------|----------|----------|----------|------|----------|----------|
| 6815 | M305T33_ | 1.678418 | -0.7471  | -0.65454 | 0.542343 | 0.511275 | DOWN | 305.2116 | 305.2115 |
| 6816 | M615T43_ | 1.095307 | 0.131335 | 0.638696 | 0.542375 | 0.511286 | UP   | 615.4413 | 615.4404 |
| 6817 | M441T13  | 1.397474 | 0.482822 | 0.637512 | 0.542417 | 0.511301 | UP   | 441.1273 | 441.1265 |
| 6818 | M896T26  | 1.669712 | -0.7396  | -0.65515 | 0.542661 | 0.511386 | DOWN | 896.4142 | 896.4121 |
| 6819 | M771T10_ | 1.675021 | 0.744179 | 0.636949 | 0.54292  | 0.511476 | UP   | 771.4074 | 771.4047 |
| 6820 | M536T34  | 1.309728 | -0.38927 | -0.64188 | 0.542975 | 0.511495 | DOWN | 536.3713 | 536.3704 |
| 6821 | M286T15  | 1.374671 | 0.459086 | 0.635341 | 0.543093 | 0.511536 | UP   | 286.1078 | 286.107  |
| 6822 | M470T16_ | 1.434832 | 0.520882 | 0.638231 | 0.543598 | 0.511712 | UP   | 470.3745 | 470.3742 |
| 6823 | M314T27  | 1.436847 | -0.52291 | -0.64404 | 0.543657 | 0.511733 | DOWN | 314.2693 | 314.2691 |
| 6824 | M255T19_ | 1.3065   | -0.38571 | -0.63526 | 0.543694 | 0.511746 | DOWN | 255.0704 | 255.0697 |
| 6825 | M360T10_ | 2.011046 | 1.007946 | 0.638142 | 0.543747 | 0.511764 | UP   | 359.8069 | 359.8066 |
| 6826 | M457T15  | 1.437589 | 0.523651 | 0.634381 | 0.544141 | 0.511901 | UP   | 457.1975 | 457.1973 |
| 6827 | M434T23_ | 1.293573 | -0.37136 | -0.64612 | 0.544167 | 0.51191  | DOWN | 434.3315 | 434.331  |
| 6828 | M314T17  | 1.639716 | 0.713446 | 0.634448 | 0.544306 | 0.511959 | UP   | 313.9831 | 313.9827 |
| 6829 | M413T14_ | 1.480402 | 0.565989 | 0.633065 | 0.544381 | 0.511985 | UP   | 413.2778 | 413.2772 |
| 6830 | M311T23_ | 1.745848 | -0.80393 | -0.65171 | 0.54444  | 0.512005 | DOWN | 311.158  | 311.1575 |
| 6831 | M356T28  | 1.641526 | 0.715038 | 0.636295 | 0.544941 | 0.512179 | UP   | 356.1974 | 356.1969 |
| 6832 | M224T19  | 1.529056 | 0.612642 | 0.632017 | 0.545013 | 0.512204 | UP   | 224.119  | 224.1188 |
| 6833 | M682T41  | 1.308417 | -0.38782 | -0.64083 | 0.545383 | 0.512332 | DOWN | 682.364  | 682.3624 |
| 6834 | M351T35  | 1.405382 | 0.490963 | 0.637396 | 0.54547  | 0.512363 | UP   | 351.1732 | 351.1729 |
| 6835 | M376T10_ | 2.516022 | -1.33114 | -0.65414 | 0.545718 | 0.512448 | DOWN | 375.9856 | 375.9845 |
| 6836 | M504T28_ | 1.681978 | -0.75016 | -0.64637 | 0.54589  | 0.512508 | DOWN | 504.2994 | 504.299  |
| 6837 | M319T19_ | 1.424573 | 0.51053  | 0.630975 | 0.54618  | 0.512609 | UP   | 319.2007 | 319.1999 |
| 6838 | M503T20_ | 1.949191 | 0.962875 | 0.646014 | 0.546215 | 0.512621 | UP   | 503.2426 | 503.2331 |
| 6839 | M485T22_ | 1.449757 | 0.535811 | 0.637171 | 0.546288 | 0.512646 | UP   | 484.917  | 484.912  |
| 6840 | M244T26  | 1.370937 | 0.455162 | 0.632802 | 0.54652  | 0.512726 | UP   | 244.2637 | 244.2632 |
| 6841 | M370T14_ | 1.354374 | 0.437627 | 0.629396 | 0.546639 | 0.512767 | UP   | 370.2591 | 370.2588 |
| 6842 | M396T18_ | 1.533355 | -0.61669 | -0.63682 | 0.546668 | 0.512777 | DOWN | 395.9899 | 395.9886 |
| 6843 | M365T40_ | 1.356944 | 0.440361 | 0.630996 | 0.546744 | 0.512804 | UP   | 365.3093 | 365.3091 |
| 6844 | M531T32  | 1.641703 | 0.715193 | 0.646789 | 0.546845 | 0.512838 | UP   | 530.9934 | 530.9929 |
| 6845 | M506T11  | 1.642307 | 0.715724 | 0.629739 | 0.546954 | 0.512876 | UP   | 506.1692 | 506.168  |
| 6846 | M556T39  | 1.231692 | 0.300642 | 0.629577 | 0.547163 | 0.512948 | UP   | 556.4486 | 556.4482 |
| 6847 | M387T27  | 1.484897 | 0.570363 | 0.628587 | 0.547652 | 0.513117 | UP   | 387.1257 | 387.1253 |
| 6848 | M623T11_ | 1.481826 | 0.567376 | 0.635362 | 0.547728 | 0.513143 | UP   | 622.8974 | 622.8959 |
| 6849 | M331T14  | 1.687331 | 0.754743 | 0.629709 | 0.548236 | 0.513318 | UP   | 330.9566 | 330.9564 |
| 6850 | M350T19_ | 2.018418 | 1.013225 | 0.629743 | 0.548321 | 0.513347 | UP   | 350.1054 | 350.1045 |
| 6851 | M476T20_ | 1.199403 | 0.262316 | 0.627951 | 0.548374 | 0.513365 | UP   | 476.3373 | 476.3372 |
| 6852 | M350T15  | 1.373517 | 0.457874 | 0.626599 | 0.548395 | 0.513373 | UP   | 350.2329 | 350.2322 |
| 6853 | M833T9   | 1.805986 | 0.852787 | 0.639678 | 0.548434 | 0.513386 | UP   | 833.4747 | 833.474  |
| 6854 | M1008T28 | 1.424386 | 0.51034  | 0.627478 | 0.54845  | 0.513392 | UP   | 1007.772 | 1007.77  |
| 6855 | M438T35  | 1.346229 | 0.428924 | 0.626482 | 0.548458 | 0.513395 | UP   | 437.7395 | 437.7389 |
| 6856 | M224T16_ | 1.532333 | 0.61573  | 0.629162 | 0.548471 | 0.513399 | UP   | 224.2188 | 224.2188 |
| 6857 | M300T36  | 1.263019 | -0.33688 | -0.62922 | 0.548504 | 0.51341  | DOWN | 300.2899 | 300.2895 |
| 6858 | M410T19_ | 1.330149 | 0.411588 | 0.627132 | 0.548951 | 0.513564 | UP   | 410.3379 | 410.337  |
| 6859 | M287T22_ | 1.232481 | -0.30157 | -0.62597 | 0.549269 | 0.513673 | DOWN | 287.1111 | 287.1106 |
| 6860 | M730T31  | 1.684437 | 0.752267 | 0.627339 | 0.549506 | 0.513755 | UP   | 730.1385 | 730.138  |
| 6861 | M703T35_ | 1.374994 | 0.459425 | 0.626445 | 0.54959  | 0.513783 | UP   | 702.537  | 702.5361 |

|      |          |          |          |          |          |          |      |          |          |
|------|----------|----------|----------|----------|----------|----------|------|----------|----------|
| 6862 | M407T10_ | 1.518213 | 0.602374 | 0.629449 | 0.54966  | 0.513807 | UP   | 407.2906 | 407.2895 |
| 6863 | M505T11_ | 2.004623 | 1.003331 | 0.62615  | 0.549938 | 0.513903 | UP   | 504.9549 | 504.9535 |
| 6864 | M363T38  | 1.324281 | 0.405209 | 0.641445 | 0.550166 | 0.513981 | UP   | 363.1934 | 363.1928 |
| 6865 | M735T22  | 1.611833 | 0.688702 | 0.629095 | 0.550183 | 0.513987 | UP   | 734.9809 | 734.9807 |
| 6866 | M322T17_ | 1.471627 | 0.557412 | 0.633877 | 0.550381 | 0.514055 | UP   | 322.0249 | 322.0248 |
| 6867 | M645T25  | 1.393556 | 0.478771 | 0.627098 | 0.550474 | 0.514087 | UP   | 645.4768 | 645.4754 |
| 6868 | M436T44  | 1.09134  | 0.1261   | 0.62399  | 0.550662 | 0.514151 | UP   | 436.2542 | 436.2534 |
| 6869 | M402T30_ | 1.388771 | 0.473809 | 0.62928  | 0.550916 | 0.514238 | UP   | 402.2578 | 402.2576 |
| 6870 | M559T21_ | 1.65065  | 0.723034 | 0.625113 | 0.550943 | 0.514247 | UP   | 559.3889 | 559.3883 |
| 6871 | M371T33  | 1.319573 | -0.40007 | -0.63349 | 0.551151 | 0.514318 | DOWN | 371.2987 | 371.2984 |
| 6872 | M749T29  | 1.440543 | 0.526613 | 0.622346 | 0.551269 | 0.514359 | UP   | 748.5425 | 748.5414 |
| 6873 | M316T26_ | 1.670234 | -0.74005 | -0.63958 | 0.5515   | 0.514438 | DOWN | 316.2274 | 316.2268 |
| 6874 | M442T35_ | 1.341892 | 0.424268 | 0.623137 | 0.551549 | 0.514455 | UP   | 442.4163 | 442.4157 |
| 6875 | M455T10_ | 1.466488 | 0.552365 | 0.622647 | 0.551567 | 0.514461 | UP   | 454.8479 | 454.8462 |
| 6876 | M386T23_ | 1.557909 | -0.63961 | -0.63103 | 0.551596 | 0.514471 | DOWN | 386.3719 | 386.3675 |
| 6877 | M214T16  | 1.342278 | 0.424683 | 0.634231 | 0.551736 | 0.514518 | UP   | 214.0898 | 214.0894 |
| 6878 | M239T26  | 1.246425 | 0.317796 | 0.621276 | 0.551761 | 0.514527 | UP   | 239.1838 | 239.1831 |
| 6879 | M747T32  | 1.414157 | 0.499943 | 0.621982 | 0.551863 | 0.514562 | UP   | 746.5271 | 746.5255 |
| 6880 | M235T19  | 1.422404 | 0.508332 | 0.621996 | 0.551992 | 0.514606 | UP   | 235.1265 | 235.1259 |
| 6881 | M571T29_ | 1.561991 | -0.64339 | -0.63109 | 0.552051 | 0.514626 | DOWN | 571.4976 | 571.497  |
| 6882 | M271T11_ | 1.527003 | 0.610703 | 0.630228 | 0.552078 | 0.514635 | UP   | 271.1137 | 271.1135 |
| 6883 | M360T29_ | 1.706168 | -0.77076 | -0.63272 | 0.552275 | 0.514702 | DOWN | 360.1808 | 360.1803 |
| 6884 | M892T28  | 1.598302 | -0.67654 | -0.63434 | 0.553149 | 0.515    | DOWN | 892.419  | 892.4188 |
| 6885 | M553T19  | 1.624819 | 0.700279 | 0.618943 | 0.553178 | 0.51501  | UP   | 553.0029 | 553.002  |
| 6886 | M564T23_ | 1.433612 | 0.519654 | 0.625616 | 0.553255 | 0.515037 | UP   | 564.3807 | 564.3805 |
| 6887 | M591T11_ | 1.503289 | 0.588122 | 0.621026 | 0.553265 | 0.51504  | UP   | 591.3002 | 591.299  |
| 6888 | M515T27  | 1.503707 | 0.588524 | 0.619064 | 0.553281 | 0.515045 | UP   | 515.045  | 515.0448 |
| 6889 | M335T9_2 | 1.373144 | -0.45748 | -0.61908 | 0.553518 | 0.515126 | DOWN | 335.2445 | 335.2435 |
| 6890 | M302T24  | 1.520455 | -0.6045  | -0.6359  | 0.553699 | 0.515188 | DOWN | 302.2693 | 302.2691 |
| 6891 | M163T29_ | 1.323993 | 0.404896 | 0.618111 | 0.5537   | 0.515188 | UP   | 163.0753 | 163.0751 |
| 6892 | M315T20  | 1.574419 | 0.654819 | 0.618444 | 0.553807 | 0.515224 | UP   | 315.1098 | 315.1097 |
| 6893 | M493T23  | 1.353506 | -0.4367  | -0.62198 | 0.553817 | 0.515228 | DOWN | 493.261  | 493.2604 |
| 6894 | M270T17  | 1.612406 | -0.68922 | -0.63379 | 0.553884 | 0.51525  | DOWN | 270.1508 | 270.1504 |
| 6895 | M421T32  | 1.337405 | 0.419436 | 0.618424 | 0.55391  | 0.515259 | UP   | 421.3161 | 421.3157 |
| 6896 | M559T21_ | 1.577254 | 0.657415 | 0.617716 | 0.553943 | 0.51527  | UP   | 559.0913 | 559.0907 |
| 6897 | M345T16_ | 1.681608 | 0.749842 | 0.619672 | 0.55405  | 0.515307 | UP   | 344.9723 | 344.9721 |
| 6898 | M291T2   | 1.391181 | 0.47631  | 0.634472 | 0.554086 | 0.515319 | UP   | 290.8891 | 290.8889 |
| 6899 | M572T31_ | 1.419366 | -0.50525 | -0.62786 | 0.55422  | 0.515364 | DOWN | 572.3348 | 572.3342 |
| 6900 | M429T18  | 1.449294 | 0.53535  | 0.61922  | 0.554508 | 0.515462 | UP   | 429.0259 | 429.0253 |
| 6901 | M466T17  | 1.75455  | 0.811101 | 0.616569 | 0.554696 | 0.515526 | UP   | 466.0249 | 466.0247 |
| 6902 | M682T43  | 1.183905 | 0.243553 | 0.618713 | 0.554829 | 0.515571 | UP   | 681.9832 | 681.9819 |
| 6903 | M910T29_ | 1.712626 | -0.77621 | -0.63232 | 0.554949 | 0.515612 | DOWN | 910.4295 | 910.4289 |
| 6904 | M493T9   | 1.372449 | -0.45675 | -0.62306 | 0.555007 | 0.515631 | DOWN | 493.2966 | 493.2955 |
| 6905 | M458T11  | 1.584764 | 0.664268 | 0.616811 | 0.555023 | 0.515637 | UP   | 458.1634 | 458.1629 |
| 6906 | M217T16  | 1.537874 | 0.620937 | 0.616018 | 0.555028 | 0.515639 | UP   | 217.0524 | 217.0521 |
| 6907 | M478T24_ | 1.464024 | 0.54994  | 0.62323  | 0.55543  | 0.515775 | UP   | 478.1892 | 478.1885 |
| 6908 | M274T19_ | 1.431442 | 0.51747  | 0.615342 | 0.555608 | 0.515835 | UP   | 274.2532 | 274.2529 |

|      |          |          |          |          |          |          |      |          |          |
|------|----------|----------|----------|----------|----------|----------|------|----------|----------|
| 6909 | M315T21  | 1.564346 | 0.64556  | 0.615014 | 0.555703 | 0.515867 | UP   | 315.1098 | 315.1094 |
| 6910 | M388T18  | 1.457008 | 0.543009 | 0.616283 | 0.555873 | 0.515925 | UP   | 387.9993 | 387.9988 |
| 6911 | M342T25_ | 1.620774 | -0.69668 | -0.62775 | 0.555875 | 0.515926 | DOWN | 342.2431 | 342.2425 |
| 6912 | M584T13  | 1.693843 | 0.7603   | 0.618199 | 0.555891 | 0.515931 | UP   | 584.077  | 584.0769 |
| 6913 | M376T35  | 1.489631 | 0.574955 | 0.634534 | 0.555911 | 0.515938 | UP   | 376.3134 | 376.3128 |
| 6914 | M426T10  | 1.468422 | 0.554267 | 0.614656 | 0.555942 | 0.515948 | UP   | 425.7848 | 425.7838 |
| 6915 | M363T13  | 1.393533 | -0.47875 | -0.6221  | 0.55598  | 0.515961 | DOWN | 363.1875 | 363.1873 |
| 6916 | M314T28  | 1.633887 | -0.70831 | -0.62939 | 0.556323 | 0.516077 | DOWN | 314.2384 | 314.2381 |
| 6917 | M395T34_ | 1.429197 | 0.515205 | 0.613975 | 0.556348 | 0.516085 | UP   | 395.0999 | 395.0995 |
| 6918 | M349T10_ | 1.56776  | -0.6487  | -0.6241  | 0.556438 | 0.516116 | DOWN | 349.1936 | 349.1931 |
| 6919 | M393T19_ | 1.492813 | -0.57803 | -0.61661 | 0.556778 | 0.516231 | DOWN | 393.2385 | 393.2298 |
| 6920 | M394T32  | 1.399344 | 0.484751 | 0.613721 | 0.556787 | 0.516234 | UP   | 394.3165 | 394.3159 |
| 6921 | M213T11_ | 1.708874 | 0.773046 | 0.612684 | 0.557148 | 0.516356 | UP   | 213.0403 | 213.04   |
| 6922 | M377T35_ | 1.540917 | 0.623789 | 0.633107 | 0.557311 | 0.516411 | UP   | 376.8152 | 376.8145 |
| 6923 | M288T22_ | 1.716395 | 0.779382 | 0.630943 | 0.557331 | 0.516417 | UP   | 288.2537 | 288.253  |
| 6924 | M410T10_ | 1.510424 | -0.59495 | -0.62567 | 0.557342 | 0.516421 | DOWN | 410.2345 | 410.2336 |
| 6925 | M397T30_ | 1.345975 | 0.428652 | 0.611862 | 0.557639 | 0.516521 | UP   | 396.9452 | 396.9447 |
| 6926 | M335T21_ | 1.352482 | 0.435609 | 0.611637 | 0.557755 | 0.51656  | UP   | 335.2416 | 335.2405 |
| 6927 | M597T9   | 1.344715 | -0.4273  | -0.6251  | 0.557772 | 0.516566 | DOWN | 597.47   | 597.4689 |
| 6928 | M582T29_ | 1.407177 | 0.492804 | 0.615007 | 0.557957 | 0.516628 | UP   | 582.2492 | 582.2482 |
| 6929 | M413T17  | 1.704711 | 0.769527 | 0.612618 | 0.558013 | 0.516647 | UP   | 412.9044 | 412.9043 |
| 6930 | M459T17  | 1.720435 | 0.782774 | 0.612426 | 0.558213 | 0.516714 | UP   | 458.91   | 458.9092 |
| 6931 | M276T22  | 1.322839 | -0.40364 | -0.61158 | 0.558391 | 0.516774 | DOWN | 276.2173 | 276.2169 |
| 6932 | M457T31  | 1.345761 | 0.428423 | 0.630759 | 0.558568 | 0.516834 | UP   | 457.0981 | 457.0979 |
| 6933 | M493T19  | 1.559714 | 0.641282 | 0.610567 | 0.55866  | 0.516865 | UP   | 493.2362 | 493.2354 |
| 6934 | M549T32  | 1.634064 | 0.708464 | 0.613609 | 0.558847 | 0.516928 | UP   | 549.3154 | 549.3146 |
| 6935 | M513T18  | 1.441396 | 0.527466 | 0.610127 | 0.559135 | 0.517025 | UP   | 513.1665 | 513.165  |
| 6936 | M324T18  | 1.440089 | 0.526158 | 0.611198 | 0.559191 | 0.517043 | UP   | 324.2749 | 324.274  |
| 6937 | M537T34  | 1.307175 | -0.38645 | -0.62048 | 0.559225 | 0.517055 | DOWN | 537.3742 | 537.3738 |
| 6938 | M469T18  | 1.628565 | -0.7036  | -0.62421 | 0.559357 | 0.517099 | DOWN | 469.2554 | 469.2549 |
| 6939 | M314T39  | 1.363183 | -0.44698 | -0.62411 | 0.559602 | 0.517181 | DOWN | 314.3052 | 314.3049 |
| 6940 | M297T14  | 1.42418  | 0.510132 | 0.612112 | 0.559636 | 0.517193 | UP   | 297.1851 | 297.1849 |
| 6941 | M461T11  | 1.599422 | 0.67755  | 0.608889 | 0.559802 | 0.517248 | UP   | 461.1472 | 461.1451 |
| 6942 | M391T23  | 1.515918 | 0.600192 | 0.608851 | 0.559817 | 0.517253 | UP   | 391.1011 | 391.1007 |
| 6943 | M335T19_ | 1.570657 | -0.65137 | -0.61453 | 0.560134 | 0.51736  | DOWN | 335.112  | 335.1117 |
| 6944 | M633T27  | 1.505351 | 0.5901   | 0.607508 | 0.560456 | 0.517467 | UP   | 632.9813 | 632.9808 |
| 6945 | M676T10_ | 1.465551 | 0.551443 | 0.60597  | 0.561699 | 0.517883 | UP   | 676.4851 | 676.4834 |
| 6946 | M517T22_ | 1.753473 | 0.810215 | 0.610887 | 0.562032 | 0.517994 | UP   | 517.137  | 517.1367 |
| 6947 | M524T29  | 1.439111 | -0.52518 | -0.62203 | 0.562086 | 0.518012 | DOWN | 523.8022 | 523.8015 |
| 6948 | M578T9   | 1.618839 | 0.694959 | 0.610377 | 0.562114 | 0.518022 | UP   | 578.377  | 578.3762 |
| 6949 | M466T43  | 1.096533 | 0.13295  | 0.607988 | 0.562674 | 0.518208 | UP   | 465.6724 | 465.6717 |
| 6950 | M851T34  | 1.458724 | 0.544707 | 0.603977 | 0.562939 | 0.518297 | UP   | 850.6017 | 850.6008 |
| 6951 | M151T12  | 1.554965 | -0.63688 | -0.61071 | 0.563148 | 0.518366 | DOWN | 151.0325 | 151.0324 |
| 6952 | M683T41  | 1.412409 | -0.49816 | -0.61094 | 0.563327 | 0.518426 | DOWN | 683.3673 | 683.3658 |
| 6953 | M166T15  | 1.354291 | 0.437538 | 0.604544 | 0.563328 | 0.518426 | UP   | 166.0864 | 166.0859 |
| 6954 | M545T11_ | 1.645223 | 0.718283 | 0.603094 | 0.563558 | 0.518502 | UP   | 545.1531 | 545.1528 |
| 6955 | M450T11_ | 1.794602 | 0.843664 | 0.602814 | 0.563597 | 0.518515 | UP   | 450.1992 | 450.1987 |

|      |          |          |          |          |          |          |      |          |          |
|------|----------|----------|----------|----------|----------|----------|------|----------|----------|
| 6956 | M850T34  | 1.426305 | 0.512282 | 0.603466 | 0.563744 | 0.518564 | UP   | 849.5987 | 849.5969 |
| 6957 | M476T20_ | 1.594625 | 0.673218 | 0.601838 | 0.563989 | 0.518646 | UP   | 476.1735 | 476.1729 |
| 6958 | M303T11  | 1.439768 | 0.525836 | 0.60468  | 0.564075 | 0.518674 | UP   | 303.1962 | 303.195  |
| 6959 | M352T17_ | 1.67017  | 0.739995 | 0.601992 | 0.564137 | 0.518695 | UP   | 352.011  | 352.0106 |
| 6960 | M433T15_ | 1.435149 | 0.521201 | 0.602564 | 0.564289 | 0.518745 | UP   | 433.2052 | 433.2043 |
| 6961 | M521T9   | 1.425428 | -0.5114  | -0.60609 | 0.564295 | 0.518747 | DOWN | 521.3358 | 521.33   |
| 6962 | M212T10_ | 2.427771 | -1.27963 | -0.62324 | 0.564296 | 0.518748 | DOWN | 212.2964 | 212.2964 |
| 6963 | M407T17  | 1.716748 | 0.779679 | 0.601217 | 0.564341 | 0.518762 | UP   | 407.1055 | 407.1051 |
| 6964 | M603T9   | 1.598472 | -0.67669 | -0.60182 | 0.564461 | 0.518802 | DOWN | 603.341  | 603.3407 |
| 6965 | M492T9_1 | 1.356967 | -0.44039 | -0.60634 | 0.564628 | 0.518858 | DOWN | 492.3024 | 492.3012 |
| 6966 | M313T26_ | 1.431393 | -0.51742 | -0.61136 | 0.564662 | 0.518869 | DOWN | 313.2852 | 313.2846 |
| 6967 | M724T31_ | 1.603492 | 0.681217 | 0.616243 | 0.564687 | 0.518877 | UP   | 723.5887 | 723.5878 |
| 6968 | M729T21  | 1.675775 | -0.74483 | -0.61544 | 0.564801 | 0.518915 | DOWN | 729.3665 | 729.3658 |
| 6969 | M286T16_ | 1.493487 | 0.578685 | 0.600164 | 0.565233 | 0.519058 | UP   | 286.2573 | 286.2572 |
| 6970 | M483T20_ | 1.545462 | 0.628038 | 0.600043 | 0.565271 | 0.519071 | UP   | 483.1443 | 483.1438 |
| 6971 | M347T33  | 1.698849 | -0.76456 | -0.61635 | 0.565329 | 0.51909  | DOWN | 347.2793 | 347.2789 |
| 6972 | M512T19  | 1.612904 | 0.689661 | 0.599178 | 0.56566  | 0.5192   | UP   | 511.9763 | 511.9761 |
| 6973 | M281T30_ | 1.622884 | -0.69856 | -0.61452 | 0.56578  | 0.519239 | DOWN | 280.518  | 280.5175 |
| 6974 | M335T19_ | 1.478645 | 0.564275 | 0.599147 | 0.565796 | 0.519245 | UP   | 335.2777 | 335.2774 |
| 6975 | M652T44  | 1.14133  | 0.190716 | 0.599642 | 0.565827 | 0.519255 | UP   | 652.5    | 652.4987 |
| 6976 | M1035T31 | 1.452482 | 0.53852  | 0.623346 | 0.565837 | 0.519258 | UP   | 1034.799 | 1034.797 |
| 6977 | M422T30  | 1.459302 | -0.54528 | -0.60017 | 0.5659   | 0.519279 | DOWN | 422.2356 | 422.2354 |
| 6978 | M301T33  | 1.408094 | 0.493744 | 0.599202 | 0.566004 | 0.519313 | UP   | 301.2163 | 301.2159 |
| 6979 | M413T22_ | 1.626436 | -0.70171 | -0.61116 | 0.566015 | 0.519317 | DOWN | 413.2188 | 413.2184 |
| 6980 | M314T23_ | 1.486313 | 0.571738 | 0.603333 | 0.566108 | 0.519348 | UP   | 313.983  | 313.9829 |
| 6981 | M421T40  | 1.167411 | 0.223312 | 0.598525 | 0.566134 | 0.519356 | UP   | 421.3353 | 421.3347 |
| 6982 | M415T23_ | 1.575352 | -0.65567 | -0.59908 | 0.566311 | 0.519415 | DOWN | 415.174  | 415.1698 |
| 6983 | M340T18_ | 1.406092 | 0.491691 | 0.598134 | 0.566337 | 0.519424 | UP   | 339.9399 | 339.9396 |
| 6984 | M666T41  | 1.237919 | 0.307917 | 0.600743 | 0.566364 | 0.519432 | UP   | 665.5002 | 665.5    |
| 6985 | M354T23_ | 1.579134 | -0.65913 | -0.61435 | 0.566413 | 0.519449 | DOWN | 354.2639 | 354.2634 |
| 6986 | M624T22_ | 1.797322 | -0.84585 | -0.61441 | 0.566832 | 0.519587 | DOWN | 624.2661 | 624.2648 |
| 6987 | M392T29  | 1.343441 | 0.425933 | 0.621277 | 0.56688  | 0.519603 | UP   | 392.27   | 392.2696 |
| 6988 | M490T21  | 1.640824 | 0.71442  | 0.599765 | 0.566967 | 0.519631 | UP   | 490.1716 | 490.1714 |
| 6989 | M409T37  | 1.262237 | 0.335983 | 0.599946 | 0.567711 | 0.519877 | UP   | 409.3357 | 409.3355 |
| 6990 | M245T19  | 1.507255 | 0.591924 | 0.595422 | 0.568031 | 0.519982 | UP   | 244.6323 | 244.6323 |
| 6991 | M373T9_2 | 1.394888 | -0.48015 | -0.59599 | 0.568104 | 0.520006 | DOWN | 373.2336 | 373.2326 |
| 6992 | M556T27_ | 1.552795 | 0.634867 | 0.613287 | 0.568224 | 0.520046 | UP   | 556.2905 | 556.2893 |
| 6993 | M1007T28 | 1.386146 | 0.47108  | 0.595173 | 0.56825  | 0.520054 | UP   | 1006.768 | 1006.766 |
| 6994 | M279T27_ | 1.477669 | -0.56332 | -0.61066 | 0.568311 | 0.520074 | DOWN | 279.1018 | 279.1012 |
| 6995 | M348T13  | 1.321284 | 0.401941 | 0.596729 | 0.568684 | 0.520197 | UP   | 348.2254 | 348.2248 |
| 6996 | M402T30_ | 1.343142 | 0.425611 | 0.594334 | 0.568724 | 0.52021  | UP   | 401.5758 | 401.5753 |
| 6997 | M510T43_ | 1.211575 | 0.276884 | 0.605747 | 0.568768 | 0.520225 | UP   | 510.4364 | 510.4358 |
| 6998 | M650T43_ | 1.095865 | -0.13207 | -0.60991 | 0.569123 | 0.520341 | DOWN | 650.2521 | 650.2515 |
| 6999 | M261T23  | 1.415763 | -0.50158 | -0.59324 | 0.570016 | 0.520634 | DOWN | 261.1767 | 261.1696 |
| 7000 | M779T11  | 1.563428 | 0.644713 | 0.596694 | 0.570257 | 0.520713 | UP   | 779.3494 | 779.347  |
| 7001 | M371T10_ | 1.37887  | 0.463487 | 0.591537 | 0.5705   | 0.520793 | UP   | 371.2458 | 371.2446 |
| 7002 | M361T25  | 1.547296 | -0.62975 | -0.6058  | 0.57058  | 0.520819 | DOWN | 361.0709 | 361.0706 |

|      |          |          |          |          |          |          |      |          |          |
|------|----------|----------|----------|----------|----------|----------|------|----------|----------|
| 7003 | M402T18_ | 1.908581 | 0.9325   | 0.603486 | 0.571343 | 0.521068 | UP   | 402.2071 | 402.2066 |
| 7004 | M221T10  | 1.670067 | 0.739906 | 0.590765 | 0.571356 | 0.521073 | UP   | 221.0879 | 221.0874 |
| 7005 | M517T29  | 1.43187  | -0.5179  | -0.59946 | 0.571468 | 0.521109 | DOWN | 516.9124 | 516.9115 |
| 7006 | M659T32  | 1.403942 | 0.489483 | 0.590814 | 0.571484 | 0.521114 | UP   | 659.4779 | 659.4765 |
| 7007 | M200T10_ | 1.680039 | 0.748495 | 0.591683 | 0.571609 | 0.521155 | UP   | 200.2444 | 200.244  |
| 7008 | M554T43  | 1.172433 | 0.229506 | 0.589841 | 0.57165  | 0.521168 | UP   | 554.1759 | 554.1748 |
| 7009 | M280T29  | 1.496153 | -0.58126 | -0.5951  | 0.571786 | 0.521213 | DOWN | 279.6471 | 279.6467 |
| 7010 | M898T41  | 1.376171 | -0.46066 | -0.59393 | 0.572001 | 0.521283 | DOWN | 898.4643 | 898.4629 |
| 7011 | M499T11_ | 1.509979 | 0.594528 | 0.601929 | 0.572143 | 0.521329 | UP   | 499.1903 | 499.1897 |
| 7012 | M284T35  | 1.423205 | -0.50914 | -0.59869 | 0.572156 | 0.521334 | DOWN | 284.2585 | 284.2582 |
| 7013 | M596T27_ | 1.373647 | -0.45801 | -0.59779 | 0.572524 | 0.521454 | DOWN | 596.2497 | 596.2489 |
| 7014 | M377T20_ | 1.418286 | 0.504148 | 0.591343 | 0.57255  | 0.521462 | UP   | 377.2631 | 377.2621 |
| 7015 | M328T30  | 1.363919 | 0.447758 | 0.588073 | 0.572712 | 0.521515 | UP   | 328.2485 | 328.2482 |
| 7016 | M552T16  | 1.2999   | 0.378401 | 0.588861 | 0.572924 | 0.521584 | UP   | 552.2658 | 552.265  |
| 7017 | M426T18  | 1.499542 | 0.584522 | 0.589019 | 0.572992 | 0.521606 | UP   | 426.0286 | 426.0281 |
| 7018 | M703T32  | 1.393772 | 0.478995 | 0.588488 | 0.573048 | 0.521624 | UP   | 702.5009 | 702.4991 |
| 7019 | M411T32_ | 1.526471 | 0.6102   | 0.605012 | 0.573136 | 0.521653 | UP   | 411.0934 | 411.0931 |
| 7020 | M287T15  | 1.364656 | 0.448538 | 0.587825 | 0.573209 | 0.521677 | UP   | 287.1111 | 287.1103 |
| 7021 | M646T25_ | 1.369075 | 0.453202 | 0.592806 | 0.573238 | 0.521686 | UP   | 645.9784 | 645.9771 |
| 7022 | M417T25_ | 1.620329 | 0.696287 | 0.587906 | 0.573409 | 0.521742 | UP   | 417.3114 | 417.3106 |
| 7023 | M381T15_ | 1.604689 | 0.682294 | 0.587639 | 0.573468 | 0.521761 | UP   | 381.0536 | 381.0533 |
| 7024 | M521T27_ | 1.677071 | -0.74594 | -0.60017 | 0.573568 | 0.521793 | DOWN | 521.2839 | 521.2835 |
| 7025 | M453T24_ | 1.431371 | 0.517397 | 0.592329 | 0.57364  | 0.521817 | UP   | 453.1839 | 453.183  |
| 7026 | M361T27_ | 1.715397 | -0.77854 | -0.6028  | 0.573773 | 0.52186  | DOWN | 361.071  | 361.0704 |
| 7027 | M511T33_ | 1.545402 | 0.627982 | 0.597309 | 0.573779 | 0.521862 | UP   | 511.434  | 511.4334 |
| 7028 | M324T13_ | 1.748756 | 0.806329 | 0.586929 | 0.573951 | 0.521918 | UP   | 324.0356 | 324.0355 |
| 7029 | M660T32_ | 1.409318 | 0.494997 | 0.587347 | 0.573978 | 0.521926 | UP   | 660.4808 | 660.4799 |
| 7030 | M555T22  | 1.628157 | -0.70324 | -0.60282 | 0.574024 | 0.521942 | DOWN | 555.1667 | 555.1651 |
| 7031 | M461T23_ | 1.413967 | 0.499748 | 0.586687 | 0.574185 | 0.521994 | UP   | 461.2801 | 461.2791 |
| 7032 | M491T21  | 1.655818 | 0.727544 | 0.590106 | 0.5742   | 0.521998 | UP   | 491.1749 | 491.1748 |
| 7033 | M334T30  | 1.178946 | 0.237498 | 0.585866 | 0.574247 | 0.522014 | UP   | 334.2461 | 334.2457 |
| 7034 | M482T7   | 1.934871 | 0.952237 | 0.589832 | 0.574433 | 0.522074 | UP   | 482.2653 | 482.2643 |
| 7035 | M508T33  | 1.442321 | -0.52839 | -0.59223 | 0.574525 | 0.522104 | DOWN | 508.3761 | 508.3754 |
| 7036 | M550T32_ | 1.603123 | 0.680885 | 0.587986 | 0.574612 | 0.522132 | UP   | 549.817  | 549.816  |
| 7037 | M367T13  | 1.412728 | 0.498484 | 0.585392 | 0.574878 | 0.522218 | UP   | 367.2959 | 367.2956 |
| 7038 | M241T16  | 1.511478 | 0.59596  | 0.585474 | 0.57489  | 0.522222 | UP   | 241.0716 | 241.0712 |
| 7039 | M409T14  | 1.806297 | 0.853035 | 0.584645 | 0.574904 | 0.522227 | UP   | 408.9704 | 408.9701 |
| 7040 | M233T22  | 1.365266 | 0.449182 | 0.586813 | 0.574959 | 0.522245 | UP   | 233.0473 | 233.0472 |
| 7041 | M388T42_ | 1.086606 | 0.119829 | 0.584406 | 0.575053 | 0.522275 | UP   | 388.3938 | 388.393  |
| 7042 | M290T9   | 1.478232 | -0.56387 | -0.58642 | 0.575159 | 0.522309 | DOWN | 290.1889 | 290.1886 |
| 7043 | M843T29  | 1.780846 | -0.83256 | -0.59045 | 0.575295 | 0.522354 | DOWN | 842.9672 | 842.9661 |
| 7044 | M473T23_ | 1.600852 | -0.67884 | -0.60211 | 0.575336 | 0.522367 | DOWN | 473.0191 | 473.0183 |
| 7045 | M424T10_ | 1.544166 | 0.626828 | 0.584284 | 0.575532 | 0.52243  | UP   | 424.2497 | 424.2486 |
| 7046 | M532T42  | 1.205032 | 0.269071 | 0.593485 | 0.575656 | 0.522471 | UP   | 532.3271 | 532.3253 |
| 7047 | M696T9_1 | 1.341525 | 0.423873 | 0.585407 | 0.575682 | 0.522479 | UP   | 695.5076 | 695.506  |
| 7048 | M483T29  | 1.371491 | -0.45575 | -0.59199 | 0.575697 | 0.522484 | DOWN | 483.3275 | 483.3267 |
| 7049 | M355T17  | 1.577079 | 0.657255 | 0.584863 | 0.575858 | 0.522536 | UP   | 355.0098 | 355.0096 |

|      |          |          |          |          |          |          |      |          |          |
|------|----------|----------|----------|----------|----------|----------|------|----------|----------|
| 7050 | M402T21  | 1.258141 | -0.33129 | -0.58998 | 0.575993 | 0.52258  | DOWN | 402.3414 | 402.341  |
| 7051 | M571T32  | 1.39664  | 0.48196  | 0.583439 | 0.576428 | 0.52272  | UP   | 571.425  | 571.4236 |
| 7052 | M626T43_ | 1.153663 | -0.20622 | -0.58521 | 0.576494 | 0.522742 | DOWN | 625.9303 | 625.9299 |
| 7053 | M332T27_ | 1.487549 | -0.57294 | -0.59443 | 0.576693 | 0.522806 | DOWN | 332.2223 | 332.2217 |
| 7054 | M467T16  | 1.556282 | 0.638104 | 0.582786 | 0.577265 | 0.52299  | UP   | 467.1631 | 467.1623 |
| 7055 | M624T32_ | 1.355688 | 0.439025 | 0.581766 | 0.577321 | 0.523008 | UP   | 624.281  | 624.2802 |
| 7056 | M299T26_ | 1.574024 | -0.65446 | -0.59632 | 0.577381 | 0.523027 | DOWN | 299.2008 | 299.2002 |
| 7057 | M434T34  | 1.458796 | 0.544778 | 0.5815   | 0.577436 | 0.523045 | UP   | 433.8151 | 433.8147 |
| 7058 | M278T30_ | 1.578718 | -0.65875 | -0.59554 | 0.577476 | 0.523058 | DOWN | 277.8103 | 277.81   |
| 7059 | M518T23  | 1.47679  | 0.562465 | 0.580975 | 0.577637 | 0.52311  | UP   | 518.1401 | 518.1397 |
| 7060 | M487T9   | 1.729397 | 0.790269 | 0.592304 | 0.577795 | 0.523161 | UP   | 486.8072 | 486.7992 |
| 7061 | M428T22  | 1.626756 | -0.702   | -0.58682 | 0.577909 | 0.523198 | DOWN | 428.1108 | 428.1103 |
| 7062 | M541T28  | 1.603314 | -0.68106 | -0.59124 | 0.57798  | 0.52322  | DOWN | 541.4294 | 541.429  |
| 7063 | M240T18_ | 1.447912 | 0.533973 | 0.581196 | 0.57816  | 0.523279 | UP   | 240.0685 | 240.0679 |
| 7064 | M344T34  | 1.170356 | -0.22695 | -0.58331 | 0.578194 | 0.523289 | DOWN | 344.3161 | 344.3154 |
| 7065 | M626T43_ | 1.219189 | 0.285921 | 0.579608 | 0.578289 | 0.52332  | UP   | 626.4841 | 626.4836 |
| 7066 | M537T43_ | 1.253141 | 0.325549 | 0.579339 | 0.578318 | 0.523329 | UP   | 537.1487 | 537.1474 |
| 7067 | M301T22_ | 1.524458 | -0.6083  | -0.59186 | 0.578492 | 0.523385 | DOWN | 301.1043 | 301.104  |
| 7068 | M336T27  | 1.465515 | -0.55141 | -0.58919 | 0.578553 | 0.523405 | DOWN | 336.1056 | 336.1047 |
| 7069 | M573T33_ | 1.465123 | -0.55102 | -0.58765 | 0.578598 | 0.523419 | DOWN | 573.3749 | 573.3737 |
| 7070 | M464T16  | 1.65996  | 0.731148 | 0.583336 | 0.578703 | 0.523453 | UP   | 464.0129 | 464.0127 |
| 7071 | M401T30_ | 1.408835 | 0.494502 | 0.579825 | 0.578737 | 0.523464 | UP   | 401.1086 | 401.1079 |
| 7072 | M495T17_ | 1.668468 | 0.738524 | 0.579305 | 0.579214 | 0.523617 | UP   | 494.9576 | 494.9575 |
| 7073 | M776T37  | 1.390396 | 0.475495 | 0.57826  | 0.579269 | 0.523635 | UP   | 775.5617 | 775.5613 |
| 7074 | M548T29_ | 1.505307 | 0.590058 | 0.577612 | 0.579478 | 0.523702 | UP   | 547.8011 | 547.8008 |
| 7075 | M303T24_ | 1.328927 | 0.410262 | 0.580885 | 0.579559 | 0.523728 | UP   | 303.232  | 303.2319 |
| 7076 | M468T30  | 1.230325 | -0.29904 | -0.57781 | 0.579597 | 0.52374  | DOWN | 468.3447 | 468.344  |
| 7077 | M458T23  | 1.446232 | 0.532299 | 0.577318 | 0.579643 | 0.523755 | UP   | 458.3672 | 458.3669 |
| 7078 | M312T34  | 1.326616 | 0.407751 | 0.577222 | 0.579671 | 0.523764 | UP   | 312.29   | 312.2897 |
| 7079 | M547T32  | 1.330551 | 0.412024 | 0.579466 | 0.579721 | 0.52378  | UP   | 546.8758 | 546.8756 |
| 7080 | M297T23_ | 1.407979 | -0.49363 | -0.58892 | 0.579793 | 0.523803 | DOWN | 297.073  | 297.0727 |
| 7081 | M387T16  | 1.63419  | 0.708576 | 0.579321 | 0.5798   | 0.523805 | UP   | 387.0026 | 387.0024 |
| 7082 | M239T18_ | 1.510915 | 0.595422 | 0.576898 | 0.5799   | 0.523837 | UP   | 238.9926 | 238.9923 |
| 7083 | M311T17_ | 1.587634 | 0.666878 | 0.578132 | 0.579942 | 0.523851 | UP   | 310.9845 | 310.984  |
| 7084 | M584T28  | 1.989975 | 0.99275  | 0.590925 | 0.580071 | 0.523892 | UP   | 584.2211 | 584.2209 |
| 7085 | M497T27_ | 1.490467 | -0.57576 | -0.58512 | 0.58016  | 0.52392  | DOWN | 496.885  | 496.8841 |
| 7086 | M705T29  | 1.394483 | 0.47973  | 0.577273 | 0.580193 | 0.523931 | UP   | 704.5163 | 704.515  |
| 7087 | M434T23_ | 1.482308 | 0.567845 | 0.579068 | 0.580402 | 0.523998 | UP   | 434.0041 | 434.0036 |
| 7088 | M527T29  | 1.441994 | -0.52807 | -0.58788 | 0.580408 | 0.524    | DOWN | 527.2961 | 527.2961 |
| 7089 | M593T44_ | 1.09632  | 0.132669 | 0.583287 | 0.580496 | 0.524028 | UP   | 593.4282 | 593.4272 |
| 7090 | M480T28  | 1.445675 | -0.53174 | -0.58834 | 0.580577 | 0.524054 | DOWN | 480.3448 | 480.3441 |
| 7091 | M289T38  | 1.404189 | 0.489737 | 0.575782 | 0.580797 | 0.524124 | UP   | 289.2739 | 289.2735 |
| 7092 | M430T30_ | 1.12335  | 0.167808 | 0.576308 | 0.58083  | 0.524135 | UP   | 429.8024 | 429.8017 |
| 7093 | M278T26_ | 1.287122 | 0.364148 | 0.57575  | 0.580835 | 0.524137 | UP   | 278.1834 | 278.1828 |
| 7094 | M257T18  | 1.933886 | 0.951503 | 0.587648 | 0.580871 | 0.524148 | UP   | 257.0711 | 257.0705 |
| 7095 | M472T35_ | 1.601857 | 0.679746 | 0.579067 | 0.580889 | 0.524154 | UP   | 472.1079 | 472.1078 |
| 7096 | M393T20_ | 1.656086 | -0.72778 | -0.58628 | 0.581238 | 0.524265 | DOWN | 393.1404 | 393.1403 |

|      |          |          |          |          |          |          |      |          |          |
|------|----------|----------|----------|----------|----------|----------|------|----------|----------|
| 7097 | M432T10  | 1.281258 | 0.357561 | 0.576091 | 0.581275 | 0.524277 | UP   | 432.2457 | 432.2371 |
| 7098 | M241T23  | 1.512369 | -0.59681 | -0.59008 | 0.58144  | 0.52433  | DOWN | 241.0497 | 241.0492 |
| 7099 | M428T11_ | 1.885541 | 0.914979 | 0.575369 | 0.581472 | 0.52434  | UP   | 428.0462 | 428.0456 |
| 7100 | M437T9_1 | 1.538108 | -0.62116 | -0.5762  | 0.581697 | 0.524412 | DOWN | 437.2357 | 437.2353 |
| 7101 | M350T28  | 1.542722 | 0.625478 | 0.574684 | 0.581703 | 0.524414 | UP   | 350.1417 | 350.1413 |
| 7102 | M211T25_ | 1.732832 | 0.793132 | 0.580655 | 0.581712 | 0.524417 | UP   | 211.1118 | 211.1114 |
| 7103 | M815T37  | 1.261288 | 0.334898 | 0.575367 | 0.581733 | 0.524423 | UP   | 814.5533 | 814.5528 |
| 7104 | M533T18_ | 1.672821 | -0.74228 | -0.58016 | 0.581973 | 0.5245   | DOWN | 533.1295 | 533.1289 |
| 7105 | M394T20_ | 1.385819 | 0.470739 | 0.575669 | 0.582196 | 0.524571 | UP   | 394.2897 | 394.2894 |
| 7106 | M322T17_ | 1.41354  | 0.499312 | 0.581398 | 0.582239 | 0.524585 | UP   | 321.9767 | 321.9765 |
| 7107 | M356T30  | 1.092927 | 0.128197 | 0.573017 | 0.582644 | 0.524714 | UP   | 356.2796 | 356.2791 |
| 7108 | M395T44_ | 1.265395 | 0.339588 | 0.594715 | 0.582746 | 0.524746 | UP   | 395.2204 | 395.2197 |
| 7109 | M454T9_9 | 2.240899 | 1.164078 | 0.591608 | 0.582902 | 0.524796 | UP   | 454.4263 | 454.4228 |
| 7110 | M377T19  | 1.302093 | 0.380832 | 0.575532 | 0.582933 | 0.524806 | UP   | 377.308  | 377.3074 |
| 7111 | M447T31  | 1.327158 | 0.40834  | 0.57237  | 0.583041 | 0.52484  | UP   | 447.0713 | 447.0707 |
| 7112 | M467T9_1 | 1.358991 | 0.442536 | 0.580331 | 0.583193 | 0.524889 | UP   | 467.3229 | 467.321  |
| 7113 | M526T7   | 1.875983 | 0.907647 | 0.577126 | 0.583419 | 0.524961 | UP   | 526.2913 | 526.2908 |
| 7114 | M303T28_ | 1.464852 | 0.550755 | 0.573036 | 0.583438 | 0.524967 | UP   | 303.1256 | 303.1253 |
| 7115 | M310T31_ | 1.217971 | 0.284479 | 0.571421 | 0.58351  | 0.524989 | UP   | 310.2013 | 310.2008 |
| 7116 | M1111T11 | 1.524978 | 0.608789 | 0.571582 | 0.583515 | 0.524991 | UP   | 1110.624 | 1110.62  |
| 7117 | M540T28_ | 1.58621  | -0.66558 | -0.58214 | 0.583539 | 0.524999 | DOWN | 540.4261 | 540.4255 |
| 7118 | M417T22_ | 1.315287 | 0.395378 | 0.581285 | 0.583639 | 0.525031 | UP   | 417.0175 | 417.0157 |
| 7119 | M469T16  | 1.478224 | 0.563865 | 0.571711 | 0.583685 | 0.525045 | UP   | 469.1634 | 469.1629 |
| 7120 | M313T23_ | 2.308614 | 1.207027 | 0.588197 | 0.583694 | 0.525048 | UP   | 313.263  | 313.2598 |
| 7121 | M443T35_ | 1.324235 | 0.405159 | 0.570976 | 0.583705 | 0.525051 | UP   | 443.1043 | 443.1037 |
| 7122 | M704T32  | 1.388388 | 0.473411 | 0.571989 | 0.583707 | 0.525052 | UP   | 703.5043 | 703.5029 |
| 7123 | M937T18  | 1.523678 | 0.607558 | 0.570776 | 0.583839 | 0.525094 | UP   | 936.9736 | 936.9736 |
| 7124 | M377T35_ | 1.536734 | 0.619867 | 0.588536 | 0.584014 | 0.52515  | UP   | 377.3167 | 377.3159 |
| 7125 | M462T9_1 | 1.395648 | 0.480935 | 0.570781 | 0.584098 | 0.525176 | UP   | 461.8568 | 461.8553 |
| 7126 | M334T23  | 1.478794 | -0.56442 | -0.58099 | 0.584327 | 0.525249 | DOWN | 334.2339 | 334.2333 |
| 7127 | M585T35  | 1.377114 | 0.461648 | 0.571284 | 0.58459  | 0.525333 | UP   | 585.4404 | 585.4395 |
| 7128 | M587T7   | 2.32743  | 1.218738 | 0.579495 | 0.584697 | 0.525366 | UP   | 587.3393 | 587.3387 |
| 7129 | M589T26_ | 1.631732 | 0.706404 | 0.576232 | 0.584749 | 0.525383 | UP   | 589.0856 | 589.085  |
| 7130 | M226T16_ | 1.354954 | 0.438244 | 0.570225 | 0.584895 | 0.525429 | UP   | 226.1997 | 226.1992 |
| 7131 | M619T18  | 1.657654 | 0.729143 | 0.57025  | 0.585009 | 0.525465 | UP   | 619.2064 | 619.2062 |
| 7132 | M612T41  | 1.345366 | 0.427998 | 0.56912  | 0.58513  | 0.525504 | UP   | 612.4685 | 612.4678 |
| 7133 | M327T13_ | 1.300109 | 0.378632 | 0.569087 | 0.585159 | 0.525513 | UP   | 327.2647 | 327.264  |
| 7134 | M973T41_ | 2.037527 | -1.02682 | -0.57386 | 0.585461 | 0.525608 | DOWN | 973.486  | 973.484  |
| 7135 | M385T23_ | 1.614684 | 0.691252 | 0.584098 | 0.585481 | 0.525615 | UP   | 385.3614 | 385.3552 |
| 7136 | M273T23  | 1.356388 | -0.43977 | -0.57583 | 0.585737 | 0.525696 | DOWN | 273.2212 | 273.2212 |
| 7137 | M569T18  | 1.638312 | -0.71221 | -0.57958 | 0.585801 | 0.525716 | DOWN | 569.0122 | 569.0113 |
| 7138 | M615T32  | 1.398421 | 0.483798 | 0.568403 | 0.58598  | 0.525773 | UP   | 615.4515 | 615.45   |
| 7139 | M652T9_2 | 1.539427 | 0.622394 | 0.578479 | 0.586114 | 0.525815 | UP   | 652.4121 | 652.4102 |
| 7140 | M269T28_ | 1.387472 | 0.472459 | 0.567828 | 0.586144 | 0.525824 | UP   | 269.0859 | 269.0854 |
| 7141 | M476T9_3 | 1.823667 | 0.866842 | 0.579474 | 0.586156 | 0.525828 | UP   | 476.2567 | 476.247  |
| 7142 | M418T29  | 1.418075 | -0.50393 | -0.57932 | 0.586258 | 0.525861 | DOWN | 418.3316 | 418.3312 |
| 7143 | M520T32_ | 1.617917 | -0.69414 | -0.57663 | 0.586292 | 0.525871 | DOWN | 519.9014 | 519.9005 |



|      |          |          |          |          |          |          |      |          |          |
|------|----------|----------|----------|----------|----------|----------|------|----------|----------|
| 7144 | M384T16_ | 1.593756 | 0.672431 | 0.568964 | 0.586447 | 0.52592  | UP   | 384.1837 | 384.1829 |
| 7145 | M284T44  | 1.110817 | 0.151621 | 0.566381 | 0.586668 | 0.52599  | UP   | 284.2948 | 284.2943 |
| 7146 | M346T11_ | 1.372501 | 0.456808 | 0.567938 | 0.58669  | 0.525997 | UP   | 346.1753 | 346.1752 |
| 7147 | M460T23_ | 1.491931 | 0.577181 | 0.566372 | 0.58684  | 0.526045 | UP   | 460.0483 | 460.048  |
| 7148 | M274T30_ | 1.283143 | 0.359682 | 0.570023 | 0.586883 | 0.526058 | UP   | 274.1886 | 274.1878 |
| 7149 | M509T33  | 1.444677 | -0.53075 | -0.5709  | 0.586898 | 0.526063 | DOWN | 509.3796 | 509.3785 |
| 7150 | M510T21  | 1.517854 | 0.602033 | 0.571354 | 0.586898 | 0.526063 | UP   | 510.4006 | 510.3996 |
| 7151 | M299T30_ | 1.357579 | 0.441036 | 0.565706 | 0.587147 | 0.526141 | UP   | 299.162  | 299.1615 |
| 7152 | M580T31  | 1.380893 | -0.4656  | -0.57359 | 0.58732  | 0.526196 | DOWN | 580.295  | 580.2913 |
| 7153 | M476T24_ | 1.60744  | -0.68477 | -0.57701 | 0.587454 | 0.526238 | DOWN | 476.1341 | 476.1337 |
| 7154 | M347T10_ | 1.408042 | 0.493691 | 0.56512  | 0.587514 | 0.526257 | UP   | 347.2675 | 347.2663 |
| 7155 | M238T18  | 1.48147  | 0.567029 | 0.566045 | 0.587516 | 0.526258 | UP   | 238.0732 | 238.0724 |
| 7156 | M455T18  | 1.496725 | 0.581809 | 0.564957 | 0.587842 | 0.52636  | UP   | 455.113  | 455.1122 |
| 7157 | M336T25  | 1.280232 | 0.356405 | 0.580074 | 0.587877 | 0.526371 | UP   | 336.2255 | 336.2253 |
| 7158 | M548T28_ | 1.802121 | 0.849696 | 0.576357 | 0.58795  | 0.526394 | UP   | 548.4679 | 548.4672 |
| 7159 | M443T33_ | 1.358766 | -0.4423  | -0.5643  | 0.588034 | 0.526421 | DOWN | 443.2391 | 443.2389 |
| 7160 | M475T9   | 1.402461 | -0.48796 | -0.5691  | 0.588193 | 0.526471 | DOWN | 475.3248 | 475.3235 |
| 7161 | M934T11_ | 1.667455 | 0.737648 | 0.566006 | 0.588559 | 0.526586 | UP   | 934.4963 | 934.494  |
| 7162 | M432T25_ | 1.391213 | -0.47634 | -0.57654 | 0.588582 | 0.526593 | DOWN | 432.2382 | 432.2376 |
| 7163 | M492T7   | 1.76549  | 0.820069 | 0.563794 | 0.588722 | 0.526637 | UP   | 492.3521 | 492.3516 |
| 7164 | M282T31_ | 1.406088 | 0.491687 | 0.563218 | 0.588763 | 0.52665  | UP   | 282.1663 | 282.1662 |
| 7165 | M633T22_ | 1.476738 | 0.562414 | 0.564151 | 0.588785 | 0.526657 | UP   | 633.0396 | 633.0394 |
| 7166 | M629T27  | 1.662746 | -0.73357 | -0.57434 | 0.588858 | 0.52668  | DOWN | 629.3844 | 629.3841 |
| 7167 | M320T31_ | 1.577984 | 0.658082 | 0.567992 | 0.588934 | 0.526704 | UP   | 320.1309 | 320.1306 |
| 7168 | M497T7   | 1.793681 | 0.842923 | 0.568677 | 0.589133 | 0.526766 | UP   | 497.2359 | 497.2357 |
| 7169 | M375T9_1 | 1.368885 | 0.453001 | 0.562887 | 0.589287 | 0.526815 | UP   | 375.2168 | 375.2165 |
| 7170 | M748T32  | 1.379556 | 0.464204 | 0.563461 | 0.589315 | 0.526823 | UP   | 747.5306 | 747.5284 |
| 7171 | M357T19_ | 1.483578 | 0.56908  | 0.562624 | 0.58945  | 0.526866 | UP   | 356.9925 | 356.9924 |
| 7172 | M791T20  | 1.470285 | 0.556095 | 0.564729 | 0.589576 | 0.526905 | UP   | 790.5537 | 790.5521 |
| 7173 | M507T11_ | 1.761882 | 0.817117 | 0.561658 | 0.589743 | 0.526958 | UP   | 507.4714 | 507.4701 |
| 7174 | M271T11_ | 1.510691 | 0.595208 | 0.571075 | 0.589789 | 0.526972 | UP   | 270.6118 | 270.6112 |
| 7175 | M173T11  | 1.344147 | 0.426691 | 0.561612 | 0.589818 | 0.526981 | UP   | 173.0962 | 173.0957 |
| 7176 | M540T21  | 1.502589 | 0.587451 | 0.561534 | 0.589824 | 0.526983 | UP   | 540.0774 | 540.0765 |
| 7177 | M715T9   | 1.812176 | 0.857723 | 0.575976 | 0.58984  | 0.526988 | UP   | 715.4745 | 715.4742 |
| 7178 | M225T16_ | 1.329739 | 0.411144 | 0.562304 | 0.589985 | 0.527034 | UP   | 225.1963 | 225.1959 |
| 7179 | M630T19  | 1.614966 | 0.691504 | 0.561259 | 0.590087 | 0.527066 | UP   | 629.9121 | 629.912  |
| 7180 | M268T28  | 1.410505 | 0.496212 | 0.561036 | 0.590276 | 0.527125 | UP   | 268.0826 | 268.0821 |
| 7181 | M251T15  | 1.261823 | 0.33551  | 0.562768 | 0.590342 | 0.527145 | UP   | 251.1279 | 251.1275 |
| 7182 | M432T9_2 | 1.614183 | 0.690804 | 0.571738 | 0.590488 | 0.527191 | UP   | 432.3572 | 432.356  |
| 7183 | M166T21  | 1.323023 | 0.403838 | 0.561055 | 0.590588 | 0.527222 | UP   | 166.0407 | 166.0406 |
| 7184 | M336T34  | 1.37979  | 0.464449 | 0.560061 | 0.59096  | 0.527339 | UP   | 336.2746 | 336.2742 |
| 7185 | M451T20_ | 1.570927 | -0.65162 | -0.57055 | 0.591038 | 0.527363 | DOWN | 451.2069 | 451.2068 |
| 7186 | M719T10  | 1.530284 | 0.6138   | 0.559759 | 0.591078 | 0.527376 | UP   | 719.4161 | 719.4155 |
| 7187 | M416T20  | 1.282044 | 0.358446 | 0.564805 | 0.591115 | 0.527387 | UP   | 416.2153 | 416.2145 |
| 7188 | M295T26_ | 1.53724  | -0.62034 | -0.57571 | 0.59123  | 0.527423 | DOWN | 295.2271 | 295.2268 |
| 7189 | M733T21  | 1.815475 | 0.860347 | 0.565343 | 0.591435 | 0.527487 | UP   | 733.2348 | 733.234  |
| 7190 | M312T21_ | 1.426738 | 0.51272  | 0.559974 | 0.591491 | 0.527505 | UP   | 312.1263 | 312.1262 |

|      |          |          |          |          |          |          |      |          |          |
|------|----------|----------|----------|----------|----------|----------|------|----------|----------|
| 7191 | M452T30_ | 1.095464 | 0.131541 | 0.566614 | 0.591595 | 0.527537 | UP   | 451.8155 | 451.8152 |
| 7192 | M369T32  | 1.260416 | 0.3339   | 0.570663 | 0.591766 | 0.527591 | UP   | 369.2194 | 369.2192 |
| 7193 | M548T21_ | 1.449278 | -0.53533 | -0.57025 | 0.591947 | 0.527647 | DOWN | 548.0718 | 548.0715 |
| 7194 | M550T31_ | 1.560576 | 0.642079 | 0.560838 | 0.591953 | 0.527649 | UP   | 550.259  | 550.2581 |
| 7195 | M805T34  | 1.392602 | 0.477783 | 0.558912 | 0.592106 | 0.527697 | UP   | 804.5691 | 804.5674 |
| 7196 | M354T24  | 1.488982 | -0.57433 | -0.56952 | 0.592153 | 0.527712 | DOWN | 354.2641 | 354.2638 |
| 7197 | M234T16_ | 1.245135 | 0.316302 | 0.557613 | 0.59238  | 0.527782 | UP   | 234.1126 | 234.1124 |
| 7198 | M879T32  | 1.358414 | 0.441923 | 0.558361 | 0.592459 | 0.527807 | UP   | 878.606  | 878.6033 |
| 7199 | M806T34  | 1.394116 | 0.479351 | 0.558494 | 0.592465 | 0.527809 | UP   | 805.5725 | 805.5709 |
| 7200 | M365T10_ | 1.602434 | 0.680265 | 0.559213 | 0.592518 | 0.527825 | UP   | 365.1657 | 365.1654 |
| 7201 | M440T29  | 1.353225 | 0.436402 | 0.558777 | 0.59258  | 0.527845 | UP   | 440.3583 | 440.3575 |
| 7202 | M548T18  | 1.438816 | 0.524882 | 0.557968 | 0.592633 | 0.527861 | UP   | 548.1297 | 548.1292 |
| 7203 | M445T30  | 1.080543 | 0.111756 | 0.559798 | 0.592664 | 0.527871 | UP   | 445.3354 | 445.3347 |
| 7204 | M300T30  | 1.370239 | 0.454428 | 0.558122 | 0.59267  | 0.527873 | UP   | 300.1653 | 300.1649 |
| 7205 | M293T17  | 1.26893  | -0.34361 | -0.56347 | 0.592681 | 0.527876 | DOWN | 293.1092 | 293.1089 |
| 7206 | M341T30  | 1.204784 | 0.268775 | 0.570972 | 0.593162 | 0.528026 | UP   | 341.2438 | 341.2432 |
| 7207 | M401T18_ | 1.299912 | 0.378414 | 0.556821 | 0.5932   | 0.528038 | UP   | 401.1937 | 401.193  |
| 7208 | M487T41  | 1.307633 | 0.386957 | 0.559746 | 0.593243 | 0.528051 | UP   | 487.3416 | 487.3403 |
| 7209 | M382T24  | 1.697676 | -0.76356 | -0.57728 | 0.593323 | 0.528076 | DOWN | 382.2056 | 382.2049 |
| 7210 | M248T17_ | 1.292546 | 0.370216 | 0.556042 | 0.593548 | 0.528146 | UP   | 248.1688 | 248.1682 |
| 7211 | M557T43  | 1.285209 | 0.362003 | 0.55626  | 0.593647 | 0.528177 | UP   | 557.1715 | 557.1704 |
| 7212 | M455T34_ | 1.43469  | 0.520739 | 0.556177 | 0.593667 | 0.528183 | UP   | 455.3263 | 455.3257 |
| 7213 | M889T30  | 1.678548 | 0.747214 | 0.556413 | 0.593792 | 0.528222 | UP   | 889.1455 | 889.1449 |
| 7214 | M243T10_ | 1.337595 | 0.419641 | 0.555289 | 0.594015 | 0.528291 | UP   | 243.0879 | 243.0871 |
| 7215 | M331T17_ | 1.425307 | 0.511272 | 0.565074 | 0.594045 | 0.5283   | UP   | 330.9899 | 330.9864 |
| 7216 | M315T35  | 1.421585 | 0.5075   | 0.554948 | 0.594103 | 0.528318 | UP   | 315.1745 | 315.1738 |
| 7217 | M1036T31 | 1.582548 | 0.662249 | 0.57479  | 0.594107 | 0.52832  | UP   | 1035.802 | 1035.8   |
| 7218 | M792T32  | 1.369257 | 0.453393 | 0.555762 | 0.594171 | 0.52834  | UP   | 791.5571 | 791.5554 |
| 7219 | M498T14  | 1.595899 | 0.674369 | 0.559343 | 0.594298 | 0.528379 | UP   | 498.0485 | 498.0477 |
| 7220 | M244T15  | 1.300117 | 0.378642 | 0.556316 | 0.594445 | 0.528425 | UP   | 244.1909 | 244.1904 |
| 7221 | M706T29  | 1.389322 | 0.474381 | 0.555109 | 0.594477 | 0.528435 | UP   | 705.5197 | 705.5183 |
| 7222 | M434T15  | 1.599782 | 0.677875 | 0.555358 | 0.594554 | 0.528459 | UP   | 434.1347 | 434.1346 |
| 7223 | M373T12  | 1.540189 | 0.623108 | 0.557358 | 0.594652 | 0.528489 | UP   | 373.2201 | 373.2198 |
| 7224 | M415T26_ | 1.45658  | -0.54259 | -0.56461 | 0.594895 | 0.528564 | DOWN | 415.3168 | 415.316  |
| 7225 | M584T35  | 1.352063 | 0.435162 | 0.555366 | 0.59515  | 0.528643 | UP   | 584.437  | 584.4361 |
| 7226 | M692T28  | 1.385336 | 0.470236 | 0.558525 | 0.595345 | 0.528704 | UP   | 692.1791 | 692.1771 |
| 7227 | M528T29_ | 1.354798 | 0.438078 | 0.554338 | 0.595584 | 0.528778 | UP   | 528.4107 | 528.4098 |
| 7228 | M432T11_ | 1.619933 | 0.695934 | 0.554803 | 0.595681 | 0.528808 | UP   | 432.2033 | 432.202  |
| 7229 | M452T9_1 | 1.374963 | 0.459393 | 0.561535 | 0.595695 | 0.528812 | UP   | 451.5486 | 451.5469 |
| 7230 | M517T21  | 1.484869 | 0.570335 | 0.552491 | 0.595709 | 0.528816 | UP   | 517.0612 | 517.0611 |
| 7231 | M555T9   | 1.677101 | 0.74597  | 0.564004 | 0.595753 | 0.52883  | UP   | 555.2682 | 555.2669 |
| 7232 | M551T31_ | 1.593003 | 0.671749 | 0.553758 | 0.59585  | 0.52886  | UP   | 550.7605 | 550.7601 |
| 7233 | M361T37_ | 1.063077 | 0.088246 | 0.553624 | 0.595884 | 0.528871 | UP   | 361.3658 | 361.3653 |
| 7234 | M320T25_ | 1.443752 | -0.52982 | -0.56524 | 0.595924 | 0.528883 | DOWN | 320.2306 | 320.2303 |
| 7235 | M512T32  | 1.31003  | 0.3896   | 0.552263 | 0.595956 | 0.528893 | UP   | 512.3947 | 512.3936 |
| 7236 | M412T22_ | 1.629504 | -0.70443 | -0.56428 | 0.59599  | 0.528903 | DOWN | 412.2152 | 412.2146 |
| 7237 | M315T28  | 1.432488 | -0.51852 | -0.56354 | 0.59605  | 0.528922 | DOWN | 315.1359 | 315.1356 |

|      |          |          |          |          |          |          |      |          |          |
|------|----------|----------|----------|----------|----------|----------|------|----------|----------|
| 7238 | M776T41  | 1.256644 | -0.32958 | -0.55266 | 0.596052 | 0.528923 | DOWN | 776.453  | 776.452  |
| 7239 | M484T29_ | 1.350717 | 0.433725 | 0.553474 | 0.596089 | 0.528934 | UP   | 484.3844 | 484.3836 |
| 7240 | M407T9   | 1.583782 | -0.66337 | -0.56254 | 0.596126 | 0.528945 | DOWN | 407.2252 | 407.225  |
| 7241 | M246T9_2 | 1.40368  | -0.48921 | -0.55185 | 0.596247 | 0.528983 | DOWN | 246.149  | 246.1483 |
| 7242 | M493T18_ | 1.353254 | 0.436432 | 0.553013 | 0.596528 | 0.52907  | UP   | 493.3063 | 493.3053 |
| 7243 | M627T10  | 1.477502 | 0.56316  | 0.551652 | 0.596551 | 0.529077 | UP   | 627.4495 | 627.449  |
| 7244 | M616T29  | 1.364454 | 0.448324 | 0.552398 | 0.596644 | 0.529106 | UP   | 616.4635 | 616.4623 |
| 7245 | M877T32  | 1.820088 | 0.864008 | 0.551359 | 0.596825 | 0.529161 | UP   | 877.3818 | 877.3814 |
| 7246 | M748T34  | 1.145705 | -0.19624 | -0.5541  | 0.596828 | 0.529162 | DOWN | 747.5304 | 747.5289 |
| 7247 | M933T11  | 1.636166 | 0.710319 | 0.553023 | 0.597083 | 0.529241 | UP   | 933.4937 | 933.4921 |
| 7248 | M362T31_ | 1.412388 | 0.498136 | 0.551988 | 0.597283 | 0.529303 | UP   | 362.2976 | 362.2971 |
| 7249 | M423T6   | 1.903678 | -0.92879 | -0.55225 | 0.597306 | 0.52931  | DOWN | 423.2467 | 423.2462 |
| 7250 | M585T13  | 1.5073   | -0.59197 | -0.56339 | 0.597341 | 0.529321 | DOWN | 585.4009 | 585.4002 |
| 7251 | M288T24  | 1.510144 | 0.594686 | 0.557913 | 0.597391 | 0.529336 | UP   | 288.2535 | 288.253  |
| 7252 | M538T21  | 1.518726 | 0.602861 | 0.549973 | 0.597405 | 0.52934  | UP   | 538.082  | 538.0812 |
| 7253 | M346T34  | 1.572401 | 0.65297  | 0.551938 | 0.597486 | 0.529365 | UP   | 346.1466 | 346.146  |
| 7254 | M340T35_ | 1.302594 | 0.381388 | 0.551033 | 0.597542 | 0.529383 | UP   | 340.3212 | 340.3206 |
| 7255 | M320T19  | 1.186678 | -0.24693 | -0.563   | 0.597672 | 0.529423 | DOWN | 320.2038 | 320.2036 |
| 7256 | M352T20  | 1.429753 | 0.515766 | 0.550476 | 0.59775  | 0.529447 | UP   | 351.7606 | 351.7604 |
| 7257 | M454T10_ | 1.4552   | 0.541217 | 0.549855 | 0.597782 | 0.529457 | UP   | 453.8454 | 453.8435 |
| 7258 | M483T32_ | 1.375079 | 0.459515 | 0.549934 | 0.597945 | 0.529507 | UP   | 483.3723 | 483.3717 |
| 7259 | M519T23_ | 1.330053 | 0.411484 | 0.550692 | 0.597979 | 0.529517 | UP   | 519.1324 | 519.1323 |
| 7260 | M307T10  | 1.436388 | 0.522445 | 0.551387 | 0.598218 | 0.529591 | UP   | 307.2126 | 307.2116 |
| 7261 | M635T21_ | 1.478012 | 0.563658 | 0.548397 | 0.598414 | 0.529651 | UP   | 634.9975 | 634.9971 |
| 7262 | M392T25  | 1.18479  | -0.24463 | -0.54916 | 0.598467 | 0.529667 | DOWN | 392.1606 | 392.1606 |
| 7263 | M313T30_ | 1.299519 | 0.377978 | 0.548856 | 0.598548 | 0.529692 | UP   | 313.2163 | 313.2161 |
| 7264 | M227T35  | 1.289086 | 0.366349 | 0.551139 | 0.598878 | 0.529794 | UP   | 227.2007 | 227.2006 |
| 7265 | M206T32  | 1.325446 | 0.406478 | 0.548504 | 0.599012 | 0.529835 | UP   | 206.1665 | 206.1663 |
| 7266 | M516T22  | 1.579946 | -0.65987 | -0.56249 | 0.599086 | 0.529858 | DOWN | 516.136  | 516.1357 |
| 7267 | M618T27  | 1.220569 | -0.28755 | -0.54901 | 0.599389 | 0.529951 | DOWN | 618.349  | 618.3489 |
| 7268 | M973T41_ | 1.946859 | -0.96115 | -0.55148 | 0.599402 | 0.529955 | DOWN | 972.9845 | 972.9824 |
| 7269 | M599T21_ | 1.468312 | 0.554159 | 0.546728 | 0.59963  | 0.530025 | UP   | 599.1149 | 599.1143 |
| 7270 | M478T18  | 1.35698  | 0.440399 | 0.547092 | 0.599651 | 0.530031 | UP   | 478.1868 | 478.1862 |
| 7271 | M298T16_ | 1.367234 | 0.45126  | 0.546872 | 0.599702 | 0.530047 | UP   | 298.2745 | 298.2738 |
| 7272 | M348T10_ | 1.607236 | 0.684582 | 0.546998 | 0.599719 | 0.530052 | UP   | 347.7792 | 347.7785 |
| 7273 | M539T30  | 1.159872 | -0.21397 | -0.55761 | 0.599841 | 0.53009  | DOWN | 539.3655 | 539.3605 |
| 7274 | M294T22_ | 1.493551 | -0.57875 | -0.56067 | 0.600062 | 0.530157 | DOWN | 294.1142 | 294.1134 |
| 7275 | M747T20  | 1.414529 | 0.500322 | 0.546524 | 0.600302 | 0.530231 | UP   | 746.5272 | 746.5269 |
| 7276 | M183T2   | 1.443285 | 0.529356 | 0.558436 | 0.600524 | 0.530299 | UP   | 182.9616 | 182.9614 |
| 7277 | M380T32_ | 1.639792 | -0.71351 | -0.55926 | 0.60061  | 0.530325 | DOWN | 380.2949 | 380.2942 |
| 7278 | M495T27_ | 1.397448 | -0.48279 | -0.55313 | 0.600962 | 0.530433 | DOWN | 495.3276 | 495.3269 |
| 7279 | M343T18_ | 1.483842 | 0.569337 | 0.544443 | 0.601113 | 0.530479 | UP   | 342.9772 | 342.9765 |
| 7280 | M331T13_ | 1.720349 | 0.782701 | 0.544325 | 0.601117 | 0.53048  | UP   | 330.9565 | 330.9564 |
| 7281 | M687T30  | 1.486851 | -0.57226 | -0.55135 | 0.601243 | 0.530519 | DOWN | 687.2708 | 687.2702 |
| 7282 | M316T23_ | 1.336374 | 0.418324 | 0.550351 | 0.60127  | 0.530527 | UP   | 315.9483 | 315.948  |
| 7283 | M437T22_ | 1.486111 | 0.571542 | 0.543928 | 0.601384 | 0.530562 | UP   | 437.1837 | 437.1834 |
| 7284 | M482T28_ | 1.291155 | -0.36866 | -0.54928 | 0.601539 | 0.530609 | DOWN | 482.3244 | 482.3236 |

|      |          |          |          |          |          |          |      |          |          |
|------|----------|----------|----------|----------|----------|----------|------|----------|----------|
| 7285 | M331T27_ | 1.408924 | -0.49459 | -0.55316 | 0.601715 | 0.530663 | DOWN | 331.0993 | 331.0987 |
| 7286 | M797T11  | 1.65015  | 0.722597 | 0.543597 | 0.601837 | 0.530701 | UP   | 797.439  | 797.4382 |
| 7287 | M347T10_ | 1.660002 | 0.731185 | 0.54848  | 0.601858 | 0.530707 | UP   | 346.8967 | 346.8961 |
| 7288 | M429T27_ | 1.374342 | 0.458741 | 0.543223 | 0.601883 | 0.530715 | UP   | 429.1557 | 429.1554 |
| 7289 | M280T18_ | 1.505851 | 0.590579 | 0.542324 | 0.602431 | 0.530882 | UP   | 279.7325 | 279.7324 |
| 7290 | M331T9_6 | 1.52785  | 0.611503 | 0.543259 | 0.602495 | 0.530902 | UP   | 331.3289 | 331.3285 |
| 7291 | M617T26_ | 1.609406 | 0.686528 | 0.549881 | 0.602547 | 0.530917 | UP   | 617.0803 | 617.08   |
| 7292 | M438T23  | 1.528052 | -0.61169 | -0.54989 | 0.602561 | 0.530922 | DOWN | 438.1967 | 438.1958 |
| 7293 | M433T11_ | 1.543229 | 0.625952 | 0.54433  | 0.602741 | 0.530976 | UP   | 433.2015 | 433.2011 |
| 7294 | M572T29_ | 1.350563 | 0.433561 | 0.543078 | 0.602958 | 0.531042 | UP   | 572.437  | 572.4361 |
| 7295 | M344T31  | 1.407061 | 0.492685 | 0.542888 | 0.603053 | 0.531072 | UP   | 344.2626 | 344.2623 |
| 7296 | M268T29  | 1.509677 | -0.59424 | -0.54807 | 0.603177 | 0.531109 | DOWN | 268.2272 | 268.2269 |
| 7297 | M549T33_ | 1.42846  | -0.51446 | -0.54745 | 0.603208 | 0.531119 | DOWN | 549.3746 | 549.3736 |
| 7298 | M735T7   | 2.022539 | 1.016168 | 0.545995 | 0.603248 | 0.531131 | UP   | 735.407  | 735.4065 |
| 7299 | M470T19  | 1.339041 | 0.4212   | 0.553148 | 0.60328  | 0.531141 | UP   | 470.2863 | 470.2855 |
| 7300 | M556T29  | 1.348263 | 0.431101 | 0.54321  | 0.603382 | 0.531172 | UP   | 556.4138 | 556.4133 |
| 7301 | M234T23  | 1.275063 | 0.350569 | 0.543405 | 0.603399 | 0.531177 | UP   | 234.0716 | 234.0716 |
| 7302 | M313T23_ | 1.51169  | -0.59616 | -0.55714 | 0.60345  | 0.531192 | DOWN | 313.3616 | 313.3558 |
| 7303 | M271T24  | 1.269603 | -0.34438 | -0.54746 | 0.603625 | 0.531246 | DOWN | 271.1691 | 271.1691 |
| 7304 | M245T28  | 1.404705 | -0.49027 | -0.54508 | 0.603702 | 0.531269 | DOWN | 245.1749 | 245.1744 |
| 7305 | M374T34  | 1.22547  | -0.29334 | -0.54574 | 0.603708 | 0.531271 | DOWN | 374.2118 | 374.2113 |
| 7306 | M282T18_ | 1.43251  | 0.518545 | 0.541241 | 0.603958 | 0.531347 | UP   | 282.0985 | 282.0977 |
| 7307 | M404T22_ | 1.401171 | 0.486633 | 0.544329 | 0.604072 | 0.531382 | UP   | 404.0107 | 404.0102 |
| 7308 | M394T18_ | 1.415144 | -0.50095 | -0.54513 | 0.604088 | 0.531387 | DOWN | 393.9932 | 393.9921 |
| 7309 | M662T29  | 1.380677 | 0.465376 | 0.541343 | 0.604103 | 0.531391 | UP   | 662.4963 | 662.4956 |
| 7310 | M311T19  | 1.327121 | 0.4083   | 0.540013 | 0.604282 | 0.531446 | UP   | 311.2698 | 311.2692 |
| 7311 | M197T40  | 1.107034 | -0.1467  | -0.54008 | 0.604376 | 0.531476 | DOWN | 197.0808 | 197.0807 |
| 7312 | M333T27_ | 1.438733 | -0.5248  | -0.54967 | 0.604556 | 0.531531 | DOWN | 333.2257 | 333.2251 |
| 7313 | M576T15  | 1.689842 | 0.756889 | 0.539241 | 0.604615 | 0.53155  | UP   | 576.0987 | 576.0986 |
| 7314 | M343T9   | 1.418615 | -0.50448 | -0.5387  | 0.604869 | 0.531628 | DOWN | 343.1988 | 343.1986 |
| 7315 | M300T18_ | 1.319845 | 0.400369 | 0.538542 | 0.604869 | 0.531629 | UP   | 300.2438 | 300.2433 |
| 7316 | M455T24_ | 1.707009 | -0.77147 | -0.55806 | 0.605094 | 0.5317   | DOWN | 455.2947 | 455.2937 |
| 7317 | M497T20_ | 1.341187 | 0.42351  | 0.538772 | 0.605406 | 0.531799 | UP   | 497.3668 | 497.366  |
| 7318 | M358T11  | 1.692444 | 0.759108 | 0.537722 | 0.605454 | 0.531814 | UP   | 357.9679 | 357.9674 |
| 7319 | M972T41  | 1.910959 | -0.9343  | -0.54147 | 0.60552  | 0.531835 | DOWN | 972.4825 | 972.4809 |
| 7320 | M597T32_ | 1.551391 | -0.63356 | -0.55091 | 0.605693 | 0.531889 | DOWN | 597.4422 | 597.4412 |
| 7321 | M368T9_1 | 2.039563 | -1.02826 | -0.55471 | 0.605768 | 0.531913 | DOWN | 367.6    | 367.5952 |
| 7322 | M292T29_ | 1.366849 | -0.45085 | -0.54169 | 0.605945 | 0.531969 | DOWN | 291.647  | 291.6465 |
| 7323 | M355T28_ | 1.421871 | 0.50779  | 0.53719  | 0.606051 | 0.532003 | UP   | 355.194  | 355.1937 |
| 7324 | M443T35_ | 1.375798 | 0.460269 | 0.543287 | 0.606092 | 0.532016 | UP   | 443.4196 | 443.4193 |
| 7325 | M527T32_ | 1.566686 | -0.64772 | -0.54568 | 0.606266 | 0.532071 | DOWN | 526.8512 | 526.8506 |
| 7326 | M329T33  | 1.459526 | -0.5455  | -0.54639 | 0.606695 | 0.532206 | DOWN | 329.2114 | 329.2108 |
| 7327 | M407T11_ | 1.624491 | 0.699988 | 0.5373   | 0.606824 | 0.532247 | UP   | 406.8817 | 406.8815 |
| 7328 | M407T30_ | 1.367416 | 0.451452 | 0.53673  | 0.607207 | 0.532368 | UP   | 407.3997 | 407.3992 |
| 7329 | M228T10_ | 1.534084 | 0.617377 | 0.535113 | 0.607225 | 0.532373 | UP   | 227.5975 | 227.5971 |
| 7330 | M273T11  | 1.451986 | 0.538028 | 0.539855 | 0.607408 | 0.532431 | UP   | 272.6097 | 272.6095 |
| 7331 | M376T28_ | 1.290714 | -0.36817 | -0.543   | 0.60772  | 0.53253  | DOWN | 376.3423 | 376.342  |

|      |          |          |          |          |          |          |      |          |          |
|------|----------|----------|----------|----------|----------|----------|------|----------|----------|
| 7332 | M285T24  | 1.428182 | -0.51418 | -0.54323 | 0.607723 | 0.53253  | DOWN | 285.1852 | 285.1848 |
| 7333 | M486T28  | 1.436883 | -0.52294 | -0.54444 | 0.607762 | 0.532543 | DOWN | 486.1138 | 486.113  |
| 7334 | M217T18  | 1.42304  | 0.508976 | 0.534598 | 0.607783 | 0.532549 | UP   | 217.0525 | 217.0518 |
| 7335 | M529T29_ | 1.352889 | 0.436043 | 0.535429 | 0.607962 | 0.532606 | UP   | 529.4141 | 529.4131 |
| 7336 | M402T18_ | 1.283839 | 0.360464 | 0.533956 | 0.607977 | 0.532611 | UP   | 402.197  | 402.1963 |
| 7337 | M541T21  | 1.500101 | 0.585059 | 0.533563 | 0.608146 | 0.532664 | UP   | 541.0808 | 541.0793 |
| 7338 | M385T22  | 1.465049 | 0.550949 | 0.533539 | 0.608173 | 0.532672 | UP   | 385.0114 | 385.0112 |
| 7339 | M633T10_ | 1.747135 | 0.804991 | 0.533344 | 0.60833  | 0.532722 | UP   | 633.072  | 633.0717 |
| 7340 | M401T30_ | 1.108543 | 0.148664 | 0.549218 | 0.608346 | 0.532727 | UP   | 401.309  | 401.3084 |
| 7341 | M353T43  | 1.104978 | 0.144017 | 0.538463 | 0.608404 | 0.532745 | UP   | 353.3414 | 353.3408 |
| 7342 | M383T23  | 1.326228 | 0.407328 | 0.533954 | 0.609109 | 0.532967 | UP   | 383.1564 | 383.1557 |
| 7343 | M913T22  | 1.783702 | -0.83487 | -0.54996 | 0.609121 | 0.532971 | DOWN | 913.227  | 913.2256 |
| 7344 | M581T29  | 1.315416 | 0.395519 | 0.532373 | 0.609303 | 0.533027 | UP   | 581.4316 | 581.4308 |
| 7345 | M199T33_ | 1.26708  | 0.341507 | 0.532487 | 0.609336 | 0.533038 | UP   | 199.1694 | 199.169  |
| 7346 | M561T18  | 1.496173 | 0.581277 | 0.532528 | 0.609386 | 0.533054 | UP   | 561.0179 | 561.017  |
| 7347 | M562T18_ | 1.484513 | 0.569989 | 0.53256  | 0.609391 | 0.533055 | UP   | 562.0208 | 562.0207 |
| 7348 | M584T33  | 1.592822 | 0.671585 | 0.532456 | 0.609485 | 0.533085 | UP   | 584.1229 | 584.1227 |
| 7349 | M348T24_ | 1.491687 | -0.57694 | -0.54548 | 0.609557 | 0.533107 | DOWN | 348.3109 | 348.3101 |
| 7350 | M469T39_ | 1.191077 | -0.25227 | -0.53182 | 0.609627 | 0.533129 | DOWN | 469.3133 | 469.3127 |
| 7351 | M308T10  | 1.440092 | 0.526161 | 0.534947 | 0.609822 | 0.533191 | UP   | 307.7142 | 307.7131 |
| 7352 | M482T28_ | 1.359984 | 0.443589 | 0.530166 | 0.610432 | 0.533382 | UP   | 481.8738 | 481.873  |
| 7353 | M200T10_ | 1.59552  | 0.674026 | 0.530979 | 0.610592 | 0.533432 | UP   | 200.4706 | 200.4702 |
| 7354 | M273T32_ | 1.317857 | 0.398194 | 0.530093 | 0.610698 | 0.533465 | UP   | 273.2062 | 273.2058 |
| 7355 | M508T23_ | 1.25293  | 0.325306 | 0.529696 | 0.611061 | 0.533579 | UP   | 508.3462 | 508.3457 |
| 7356 | M561T22_ | 1.505081 | 0.589842 | 0.532135 | 0.611062 | 0.533579 | UP   | 561.0544 | 561.0527 |
| 7357 | M584T31  | 1.397759 | 0.483116 | 0.532208 | 0.611188 | 0.533619 | UP   | 584.2073 | 584.2064 |
| 7358 | M335T24_ | 1.425612 | 0.511582 | 0.528941 | 0.611229 | 0.533631 | UP   | 335.058  | 335.0574 |
| 7359 | M231T22_ | 1.266127 | -0.34042 | -0.53407 | 0.611406 | 0.533687 | DOWN | 231.1594 | 231.1588 |
| 7360 | M409T11_ | 1.236924 | 0.306757 | 0.536941 | 0.611659 | 0.533766 | UP   | 409.3059 | 409.3053 |
| 7361 | M288T33  | 1.315081 | 0.395151 | 0.52803  | 0.612081 | 0.533898 | UP   | 288.2252 | 288.2246 |
| 7362 | M308T23_ | 1.35104  | 0.434071 | 0.529587 | 0.612148 | 0.533918 | UP   | 307.5385 | 307.5382 |
| 7363 | M660T29  | 1.357382 | 0.440827 | 0.528669 | 0.61217  | 0.533925 | UP   | 660.4899 | 660.4887 |
| 7364 | M341T13  | 1.571773 | 0.652393 | 0.530122 | 0.61236  | 0.533985 | UP   | 341.1374 | 341.1371 |
| 7365 | M309T25  | 1.397699 | 0.483053 | 0.539659 | 0.61237  | 0.533988 | UP   | 309.1264 | 309.1264 |
| 7366 | M547T29_ | 1.314224 | -0.39421 | -0.53026 | 0.612445 | 0.534011 | DOWN | 547.3488 | 547.3478 |
| 7367 | M347T12  | 1.714729 | -0.77798 | -0.53509 | 0.612475 | 0.534021 | DOWN | 347.2308 | 347.2304 |
| 7368 | M680T16_ | 1.322183 | -0.40292 | -0.5265  | 0.612838 | 0.534134 | DOWN | 679.5127 | 679.5125 |
| 7369 | M497T30_ | 1.219683 | -0.28651 | -0.52633 | 0.612949 | 0.534168 | DOWN | 497.3431 | 497.3423 |
| 7370 | M176T19  | 1.413155 | 0.49892  | 0.526933 | 0.613154 | 0.534232 | UP   | 176.0085 | 176.0085 |
| 7371 | M508T30_ | 1.302245 | -0.381   | -0.53155 | 0.613179 | 0.53424  | DOWN | 508.4666 | 508.4657 |
| 7372 | M351T37  | 1.217613 | 0.284056 | 0.538546 | 0.613383 | 0.534304 | UP   | 351.2723 | 351.272  |
| 7373 | M471T14_ | 1.390813 | 0.475928 | 0.528628 | 0.613424 | 0.534317 | UP   | 471.3067 | 471.3064 |
| 7374 | M483T30  | 1.389432 | 0.474495 | 0.529112 | 0.61353  | 0.534349 | UP   | 483.203  | 483.2022 |
| 7375 | M553T18  | 1.317805 | 0.398137 | 0.527406 | 0.613535 | 0.534351 | UP   | 553.2267 | 553.2254 |
| 7376 | M875T32  | 1.243613 | 0.314538 | 0.525696 | 0.613568 | 0.534361 | UP   | 874.575  | 874.5747 |
| 7377 | M480T20_ | 1.766124 | 0.820587 | 0.525287 | 0.613722 | 0.534409 | UP   | 480.0407 | 480.0403 |
| 7378 | M402T24_ | 1.48977  | -0.57509 | -0.53341 | 0.613775 | 0.534426 | DOWN | 402.1182 | 402.1177 |

|      |          |          |          |          |          |          |      |          |          |
|------|----------|----------|----------|----------|----------|----------|------|----------|----------|
| 7379 | M727T11_ | 1.585301 | 0.664757 | 0.526719 | 0.613813 | 0.534438 | UP   | 727.3598 | 727.3578 |
| 7380 | M481T7   | 1.789712 | 0.839727 | 0.528541 | 0.613837 | 0.534445 | UP   | 481.262  | 481.2614 |
| 7381 | M445T22_ | 1.289069 | -0.36633 | -0.52623 | 0.614456 | 0.534637 | DOWN | 445.0975 | 445.0974 |
| 7382 | M452T44_ | 1.070626 | 0.098454 | 0.524477 | 0.614483 | 0.534646 | UP   | 452.2492 | 452.249  |
| 7383 | M494T19  | 1.459324 | 0.5453   | 0.523882 | 0.614582 | 0.534677 | UP   | 494.2396 | 494.2394 |
| 7384 | M413T19_ | 1.459389 | 0.545365 | 0.523846 | 0.614585 | 0.534677 | UP   | 413.055  | 413.0549 |
| 7385 | M785T10  | 1.674908 | 0.744082 | 0.524118 | 0.614623 | 0.534689 | UP   | 784.6295 | 784.6292 |
| 7386 | M200T22_ | 1.450921 | -0.53697 | -0.53153 | 0.614748 | 0.534728 | DOWN | 200.037  | 200.0368 |
| 7387 | M241T22_ | 1.369927 | 0.454099 | 0.526338 | 0.6148   | 0.534744 | UP   | 241.1776 | 241.1773 |
| 7388 | M475T32  | 1.609574 | 0.686679 | 0.527057 | 0.61496  | 0.534794 | UP   | 474.6575 | 474.6574 |
| 7389 | M359T29  | 1.230683 | 0.299459 | 0.524329 | 0.61505  | 0.534822 | UP   | 359.1672 | 359.1668 |
| 7390 | M401T30_ | 1.430924 | 0.516947 | 0.525727 | 0.615132 | 0.534847 | UP   | 401.2564 | 401.2558 |
| 7391 | M452T44_ | 1.121836 | -0.16586 | -0.52283 | 0.615429 | 0.534939 | DOWN | 452.3344 | 452.3334 |
| 7392 | M454T24_ | 1.372773 | 0.457094 | 0.528229 | 0.615518 | 0.534967 | UP   | 454.1874 | 454.1868 |
| 7393 | M934T29  | 1.435803 | -0.52186 | -0.52893 | 0.615576 | 0.534985 | DOWN | 934.4366 | 934.4351 |
| 7394 | M1110T11 | 1.491427 | 0.576694 | 0.52228  | 0.615651 | 0.535008 | UP   | 1109.621 | 1109.618 |
| 7395 | M727T10  | 1.463978 | 0.549894 | 0.522215 | 0.615674 | 0.535015 | UP   | 726.9299 | 726.9296 |
| 7396 | M574T29_ | 1.352392 | 0.435513 | 0.523317 | 0.615734 | 0.535034 | UP   | 574.4432 | 574.4427 |
| 7397 | M200T21  | 1.203443 | 0.267168 | 0.5226   | 0.615803 | 0.535056 | UP   | 200.1728 | 200.1728 |
| 7398 | M334T19_ | 1.467866 | -0.55372 | -0.52796 | 0.615814 | 0.535059 | DOWN | 334.1086 | 334.1079 |
| 7399 | M558T21_ | 1.432944 | 0.518982 | 0.521846 | 0.615985 | 0.535112 | UP   | 558.0881 | 558.0875 |
| 7400 | M353T22  | 1.439319 | 0.525386 | 0.521576 | 0.616165 | 0.535168 | UP   | 353.2626 | 353.2622 |
| 7401 | M432T19  | 1.258425 | 0.33162  | 0.52233  | 0.616225 | 0.535186 | UP   | 432.3031 | 432.3027 |
| 7402 | M309T33  | 1.486077 | -0.57151 | -0.53373 | 0.616231 | 0.535188 | DOWN | 309.2038 | 309.2031 |
| 7403 | M248T28_ | 1.47889  | -0.56451 | -0.5268  | 0.61645  | 0.535256 | DOWN | 248.3589 | 248.3587 |
| 7404 | M293T10  | 1.441308 | 0.527378 | 0.521356 | 0.616599 | 0.535302 | UP   | 293.1957 | 293.1953 |
| 7405 | M406T21  | 1.453827 | 0.539855 | 0.521306 | 0.616611 | 0.535306 | UP   | 406.1317 | 406.1306 |
| 7406 | M478T31  | 1.160428 | -0.21466 | -0.52689 | 0.616766 | 0.535353 | DOWN | 478.3286 | 478.328  |
| 7407 | M431T26  | 1.28171  | 0.35807  | 0.525036 | 0.616769 | 0.535355 | UP   | 431.0329 | 431.0322 |
| 7408 | M350T14  | 1.302007 | 0.380737 | 0.519972 | 0.617239 | 0.535505 | UP   | 350.2328 | 350.2321 |
| 7409 | M701T10_ | 1.599371 | 0.677504 | 0.520664 | 0.617378 | 0.53555  | UP   | 701.4466 | 701.4451 |
| 7410 | M330T30_ | 1.316501 | -0.39671 | -0.52468 | 0.617488 | 0.535585 | DOWN | 330.243  | 330.2426 |
| 7411 | M781T29  | 1.34725  | 0.430017 | 0.51977  | 0.617504 | 0.53559  | UP   | 781.1984 | 781.1983 |
| 7412 | M388T23_ | 1.31887  | 0.399303 | 0.52105  | 0.617585 | 0.535616 | UP   | 387.5471 | 387.5465 |
| 7413 | M464T11_ | 1.521284 | 0.605289 | 0.521365 | 0.617762 | 0.535673 | UP   | 464.1456 | 464.144  |
| 7414 | M644T11  | 1.352212 | 0.435322 | 0.521069 | 0.617769 | 0.535675 | UP   | 644.4611 | 644.4595 |
| 7415 | M552T18_ | 1.313586 | 0.39351  | 0.520577 | 0.617938 | 0.535729 | UP   | 552.2233 | 552.222  |
| 7416 | M354T35  | 1.432864 | 0.518902 | 0.533146 | 0.617968 | 0.535739 | UP   | 354.3003 | 354.2998 |
| 7417 | M751T29  | 1.375571 | 0.460031 | 0.518486 | 0.618443 | 0.535891 | UP   | 750.549  | 750.5482 |
| 7418 | M759T26  | 1.534704 | 0.617961 | 0.519962 | 0.618998 | 0.536068 | UP   | 758.5633 | 758.5623 |
| 7419 | M499T9_1 | 1.423474 | 0.509416 | 0.519071 | 0.619051 | 0.536085 | UP   | 498.8034 | 498.8023 |
| 7420 | M440T10_ | 1.349427 | 0.432347 | 0.517136 | 0.61917  | 0.536123 | UP   | 440.2238 | 440.2227 |
| 7421 | M423T10_ | 1.804074 | -0.85126 | -0.52283 | 0.619196 | 0.536131 | DOWN | 423.2875 | 423.282  |
| 7422 | M266T9_2 | 1.635728 | -0.70993 | -0.51772 | 0.619215 | 0.536137 | DOWN | 266.2202 | 266.2201 |
| 7423 | M308T28_ | 1.395126 | -0.4804  | -0.52619 | 0.61927  | 0.536155 | DOWN | 308.2221 | 308.2216 |
| 7424 | M734T26  | 1.357854 | -0.44133 | -0.52506 | 0.619374 | 0.536188 | DOWN | 734.3603 | 734.3592 |
| 7425 | M326T15_ | 1.475128 | 0.56084  | 0.518189 | 0.619429 | 0.536206 | UP   | 326.1053 | 326.1053 |

|      |          |          |          |          |          |          |      |          |          |
|------|----------|----------|----------|----------|----------|----------|------|----------|----------|
| 7426 | M492T18  | 1.591657 | -0.67053 | -0.52477 | 0.619493 | 0.536226 | DOWN | 492.1026 | 492.1013 |
| 7427 | M328T34  | 1.538724 | -0.62173 | -0.52791 | 0.619673 | 0.536283 | DOWN | 328.2637 | 328.2633 |
| 7428 | M447T11  | 1.326091 | -0.40718 | -0.52706 | 0.619868 | 0.536346 | DOWN | 447.1697 | 447.1683 |
| 7429 | M629T30_ | 1.47954  | -0.56515 | -0.5251  | 0.619954 | 0.536373 | DOWN | 628.51   | 628.5087 |
| 7430 | M388T33  | 1.231364 | 0.300257 | 0.515663 | 0.620037 | 0.5364   | UP   | 388.1501 | 388.15   |
| 7431 | M320T21  | 1.335506 | 0.417387 | 0.516    | 0.62007  | 0.53641  | UP   | 320.2953 | 320.2949 |
| 7432 | M934T11_ | 1.593585 | 0.672276 | 0.518345 | 0.620072 | 0.536411 | UP   | 933.996  | 933.9942 |
| 7433 | M435T23_ | 1.254182 | 0.326746 | 0.519411 | 0.620551 | 0.536566 | UP   | 434.858  | 434.857  |
| 7434 | M457T14  | 1.513078 | 0.597486 | 0.517681 | 0.620875 | 0.536671 | UP   | 457.0218 | 457.0218 |
| 7435 | M370T42  | 1.30181  | -0.38052 | -0.51986 | 0.621067 | 0.536733 | DOWN | 370.1504 | 370.1497 |
| 7436 | M484T20_ | 1.448844 | 0.534903 | 0.51461  | 0.621265 | 0.536797 | UP   | 484.1479 | 484.1476 |
| 7437 | M435T18_ | 1.416506 | -0.50234 | -0.51968 | 0.6214   | 0.536841 | DOWN | 435.0195 | 435.0186 |
| 7438 | M308T32  | 1.438955 | -0.52502 | -0.52443 | 0.621546 | 0.536888 | DOWN | 308.2949 | 308.2948 |
| 7439 | M370T10_ | 1.378046 | 0.462624 | 0.512522 | 0.622337 | 0.537144 | UP   | 370.216  | 370.2156 |
| 7440 | M393T17  | 1.444969 | -0.53104 | -0.52656 | 0.622421 | 0.537171 | DOWN | 393.1322 | 393.1319 |
| 7441 | M666T29_ | 1.404851 | -0.49042 | -0.51692 | 0.622422 | 0.537171 | DOWN | 666.2473 | 666.2455 |
| 7442 | M442T11_ | 1.353799 | 0.437014 | 0.51404  | 0.622593 | 0.537226 | UP   | 442.3279 | 442.3269 |
| 7443 | M201T26  | 1.449583 | -0.53564 | -0.51927 | 0.622616 | 0.537234 | DOWN | 201.2042 | 201.204  |
| 7444 | M333T25  | 1.334929 | 0.416763 | 0.511888 | 0.623123 | 0.537397 | UP   | 333.1362 | 333.136  |
| 7445 | M234T10_ | 1.710828 | 0.774694 | 0.510877 | 0.623293 | 0.537452 | UP   | 233.8523 | 233.8523 |
| 7446 | M241T22_ | 1.277044 | 0.352808 | 0.513885 | 0.623429 | 0.537496 | UP   | 241.0525 | 241.0524 |
| 7447 | M642T17_ | 1.29595  | 0.37401  | 0.510424 | 0.623542 | 0.537532 | UP   | 642.4656 | 642.4641 |
| 7448 | M240T23  | 1.311991 | -0.39176 | -0.51249 | 0.623599 | 0.537551 | DOWN | 240.1957 | 240.1955 |
| 7449 | M362T28  | 1.42034  | -0.50624 | -0.51352 | 0.623725 | 0.537591 | DOWN | 362.2773 | 362.2767 |
| 7450 | M336T30_ | 1.359897 | 0.443497 | 0.510186 | 0.623743 | 0.537597 | UP   | 336.2532 | 336.2528 |
| 7451 | M572T17_ | 1.614014 | 0.690653 | 0.51068  | 0.623947 | 0.537663 | UP   | 571.8668 | 571.8662 |
| 7452 | M241T18_ | 1.318503 | 0.3989   | 0.510071 | 0.623956 | 0.537665 | UP   | 241.1518 | 241.1515 |
| 7453 | M171T18  | 1.085086 | -0.11781 | -0.51007 | 0.624336 | 0.537788 | DOWN | 171.138  | 171.1377 |
| 7454 | M661T29  | 1.341689 | 0.42405  | 0.510199 | 0.624491 | 0.537838 | UP   | 661.4934 | 661.492  |
| 7455 | M270T28_ | 1.384903 | 0.469785 | 0.509011 | 0.624545 | 0.537855 | UP   | 270.0784 | 270.0781 |
| 7456 | M797T30  | 1.06948  | 0.096909 | 0.508917 | 0.624578 | 0.537865 | UP   | 796.5427 | 796.5413 |
| 7457 | M350T34  | 1.325607 | 0.406653 | 0.508901 | 0.624578 | 0.537866 | UP   | 350.2903 | 350.2898 |
| 7458 | M354T9   | 1.275251 | -0.35078 | -0.50878 | 0.624906 | 0.537971 | DOWN | 354.2394 | 354.2381 |
| 7459 | M346T15  | 1.489645 | 0.574969 | 0.510945 | 0.625155 | 0.538051 | UP   | 346.074  | 346.0738 |
| 7460 | M338T17_ | 1.351571 | 0.434637 | 0.508487 | 0.625163 | 0.538053 | UP   | 338.2032 | 338.2031 |
| 7461 | M240T18_ | 1.299821 | 0.378313 | 0.508967 | 0.625454 | 0.538147 | UP   | 240.0149 | 240.0144 |
| 7462 | M571T18  | 1.595019 | -0.67357 | -0.51677 | 0.62547  | 0.538152 | DOWN | 570.9311 | 570.93   |
| 7463 | M485T29  | 1.333646 | 0.415376 | 0.508562 | 0.62566  | 0.538213 | UP   | 485.3878 | 485.3868 |
| 7464 | M473T30  | 1.098314 | 0.135291 | 0.508635 | 0.62566  | 0.538213 | UP   | 473.327  | 473.3262 |
| 7465 | M322T18  | 1.342248 | 0.424651 | 0.507947 | 0.62574  | 0.538239 | UP   | 322.2857 | 322.2853 |
| 7466 | M332T21_ | 1.225217 | -0.29304 | -0.50708 | 0.625916 | 0.538295 | DOWN | 332.2225 | 332.2222 |
| 7467 | M254T9_2 | 1.554513 | 0.636463 | 0.507266 | 0.626165 | 0.538375 | UP   | 254.1351 | 254.1345 |
| 7468 | M163T27  | 1.268532 | -0.34316 | -0.51269 | 0.626271 | 0.538409 | DOWN | 163.0754 | 163.075  |
| 7469 | M396T29  | 1.316433 | 0.396634 | 0.507589 | 0.626403 | 0.538451 | UP   | 396.3321 | 396.3315 |
| 7470 | M622T30_ | 1.265027 | 0.339168 | 0.506146 | 0.62656  | 0.538501 | UP   | 622.2797 | 622.2794 |
| 7471 | M606T23_ | 1.304455 | 0.383447 | 0.509287 | 0.626629 | 0.538523 | UP   | 606.4638 | 606.4635 |
| 7472 | M294T15_ | 1.316619 | 0.396838 | 0.508158 | 0.626761 | 0.538565 | UP   | 294.1703 | 294.1697 |

|      |          |          |          |          |          |          |      |          |          |
|------|----------|----------|----------|----------|----------|----------|------|----------|----------|
| 7473 | M468T32  | 1.203941 | -0.26777 | -0.51014 | 0.626791 | 0.538575 | DOWN | 468.3889 | 468.3886 |
| 7474 | M357T18  | 1.408976 | 0.494647 | 0.506742 | 0.626854 | 0.538595 | UP   | 357.1362 | 357.1356 |
| 7475 | M618T31  | 1.272587 | -0.34776 | -0.506   | 0.626882 | 0.538604 | DOWN | 618.2466 | 618.2452 |
| 7476 | M502T22  | 1.719767 | -0.78221 | -0.50966 | 0.626984 | 0.538637 | DOWN | 502.1119 | 502.1113 |
| 7477 | M573T29  | 1.336608 | 0.418576 | 0.506331 | 0.627267 | 0.538727 | UP   | 573.4405 | 573.4394 |
| 7478 | M224T21_ | 1.347665 | 0.430462 | 0.50492  | 0.627368 | 0.53876  | UP   | 224.0735 | 224.0735 |
| 7479 | M469T26_ | 1.371013 | 0.455243 | 0.506242 | 0.627388 | 0.538766 | UP   | 469.2361 | 469.2356 |
| 7480 | M438T36  | 1.356872 | 0.440285 | 0.504706 | 0.627393 | 0.538768 | UP   | 438.3791 | 438.3784 |
| 7481 | M523T11_ | 1.47026  | -0.55607 | -0.52296 | 0.627663 | 0.538854 | DOWN | 523.1598 | 523.1584 |
| 7482 | M601T18_ | 1.49973  | 0.584703 | 0.504126 | 0.627781 | 0.538892 | UP   | 601.0436 | 601.0434 |
| 7483 | M172T34  | 1.532422 | -0.61581 | -0.50975 | 0.627952 | 0.538946 | DOWN | 172.1332 | 172.133  |
| 7484 | M437T23_ | 1.459486 | -0.54546 | -0.50983 | 0.627977 | 0.538954 | DOWN | 437.1935 | 437.1925 |
| 7485 | M396T7   | 1.948122 | 0.962084 | 0.509489 | 0.628016 | 0.538967 | UP   | 396.219  | 396.2189 |
| 7486 | M754T11  | 1.565462 | 0.646588 | 0.504976 | 0.628062 | 0.538982 | UP   | 753.892  | 753.8911 |
| 7487 | M337T35_ | 1.337737 | -0.41979 | -0.51065 | 0.62825  | 0.539041 | DOWN | 337.3579 | 337.3575 |
| 7488 | M345T32_ | 1.41674  | -0.50257 | -0.5152  | 0.628354 | 0.539074 | DOWN | 345.1363 | 345.1362 |
| 7489 | M257T9_2 | 1.594567 | 0.673165 | 0.522398 | 0.62852  | 0.539128 | UP   | 256.8501 | 256.85   |
| 7490 | M269T30_ | 1.275572 | 0.351145 | 0.504007 | 0.628904 | 0.53925  | UP   | 269.2476 | 269.2472 |
| 7491 | M343T29_ | 1.283193 | 0.359738 | 0.50249  | 0.629039 | 0.539293 | UP   | 343.1541 | 343.1536 |
| 7492 | M332T33_ | 1.164424 | 0.219616 | 0.502215 | 0.629116 | 0.539317 | UP   | 332.3314 | 332.3308 |
| 7493 | M256T37  | 1.345353 | 0.427985 | 0.50224  | 0.62913  | 0.539322 | UP   | 256.2636 | 256.2633 |
| 7494 | M511T36  | 1.299284 | -0.37772 | -0.50627 | 0.629223 | 0.539352 | DOWN | 511.4833 | 511.4822 |
| 7495 | M385T35_ | 1.589562 | 0.668629 | 0.509545 | 0.629741 | 0.539516 | UP   | 385.2924 | 385.292  |
| 7496 | M343T13  | 1.509973 | 0.594522 | 0.502124 | 0.629982 | 0.539593 | UP   | 343.1328 | 343.1327 |
| 7497 | M224T18_ | 1.419928 | 0.505818 | 0.500692 | 0.630198 | 0.539662 | UP   | 224.119  | 224.1188 |
| 7498 | M556T43  | 1.166163 | 0.221769 | 0.501024 | 0.630264 | 0.539683 | UP   | 556.1726 | 556.1714 |
| 7499 | M688T21_ | 1.506795 | 0.591483 | 0.504183 | 0.63038  | 0.53972  | UP   | 687.5096 | 687.5082 |
| 7500 | M258T18  | 1.340018 | 0.422252 | 0.505022 | 0.630681 | 0.539815 | UP   | 258.0791 | 258.0787 |
| 7501 | M253T22_ | 1.366892 | -0.4509  | -0.51027 | 0.630802 | 0.539853 | DOWN | 253.0873 | 253.0869 |
| 7502 | M793T29_ | 1.363256 | 0.447056 | 0.499023 | 0.631323 | 0.540019 | UP   | 793.2694 | 793.2686 |
| 7503 | M433T37_ | 1.479299 | 0.564913 | 0.515228 | 0.631444 | 0.540057 | UP   | 433.3288 | 433.3282 |
| 7504 | M522T26_ | 1.41987  | 0.505759 | 0.498459 | 0.631575 | 0.540098 | UP   | 522.2278 | 522.2275 |
| 7505 | M270T26_ | 1.832918 | -0.87414 | -0.51164 | 0.631634 | 0.540117 | DOWN | 270.3156 | 270.3152 |
| 7506 | M535T21_ | 1.45557  | 0.541585 | 0.498101 | 0.631833 | 0.54018  | UP   | 535.072  | 535.0718 |
| 7507 | M549T29  | 1.350275 | -0.43325 | -0.50677 | 0.631855 | 0.540187 | DOWN | 549.0582 | 549.0575 |
| 7508 | M550T31_ | 1.494235 | -0.57941 | -0.50236 | 0.632043 | 0.540247 | DOWN | 550.0801 | 550.0798 |
| 7509 | M352T29_ | 1.316283 | 0.396469 | 0.498554 | 0.632083 | 0.54026  | UP   | 352.3059 | 352.3054 |
| 7510 | M367T12  | 1.360049 | 0.443659 | 0.498687 | 0.632171 | 0.540287 | UP   | 367.2748 | 367.2742 |
| 7511 | M659T20  | 1.500888 | -0.58582 | -0.50157 | 0.632367 | 0.54035  | DOWN | 659.4778 | 659.4777 |
| 7512 | M552T31_ | 1.553325 | 0.63536  | 0.497942 | 0.632613 | 0.540427 | UP   | 551.7614 | 551.7606 |
| 7513 | M332T10_ | 1.435587 | 0.521641 | 0.497068 | 0.632613 | 0.540427 | UP   | 332.0956 | 332.0951 |
| 7514 | M214T11  | 1.476051 | 0.561742 | 0.497156 | 0.632903 | 0.540519 | UP   | 214.0375 | 214.037  |
| 7515 | M492T44_ | 1.09834  | -0.13532 | -0.50876 | 0.633458 | 0.540694 | DOWN | 492.2797 | 492.2793 |
| 7516 | M331T33_ | 1.276735 | -0.35246 | -0.49924 | 0.633819 | 0.540808 | DOWN | 330.58   | 330.5797 |
| 7517 | M167T15  | 1.160745 | 0.215051 | 0.496605 | 0.633978 | 0.540858 | UP   | 167.0897 | 167.0894 |
| 7518 | M381T19  | 1.290337 | 0.367748 | 0.495659 | 0.634101 | 0.540897 | UP   | 381.3114 | 381.3106 |
| 7519 | M586T35  | 1.326125 | 0.407216 | 0.496804 | 0.634279 | 0.540953 | UP   | 586.4432 | 586.4427 |



|      |          |          |          |          |          |          |      |          |          |
|------|----------|----------|----------|----------|----------|----------|------|----------|----------|
| 7520 | M659T23  | 1.428697 | 0.5147   | 0.494294 | 0.634405 | 0.540993 | UP   | 659.4717 | 659.4715 |
| 7521 | M395T11_ | 1.340723 | 0.423012 | 0.497513 | 0.634674 | 0.541078 | UP   | 395.2912 | 395.29   |
| 7522 | M226T9   | 1.277868 | -0.35374 | -0.49407 | 0.634695 | 0.541084 | DOWN | 226.1916 | 226.1909 |
| 7523 | M398T44  | 1.117895 | -0.16078 | -0.5057  | 0.634729 | 0.541095 | DOWN | 398.2193 | 398.2192 |
| 7524 | M519T22  | 1.443677 | 0.529748 | 0.507547 | 0.635141 | 0.541225 | UP   | 519.1325 | 519.1322 |
| 7525 | M572T32  | 1.235946 | -0.30562 | -0.49465 | 0.635378 | 0.541299 | DOWN | 572.4281 | 572.4273 |
| 7526 | M326T23_ | 1.355788 | -0.43913 | -0.50494 | 0.635461 | 0.541325 | DOWN | 326.1964 | 326.1957 |
| 7527 | M912T28  | 1.373299 | 0.457646 | 0.492722 | 0.635543 | 0.541351 | UP   | 912.2882 | 912.2869 |
| 7528 | M564T29_ | 1.329796 | -0.41121 | -0.50085 | 0.635595 | 0.541368 | DOWN | 564.4279 | 564.4266 |
| 7529 | M807T34  | 1.360146 | 0.443762 | 0.492684 | 0.636025 | 0.541503 | UP   | 806.5753 | 806.5744 |
| 7530 | M364T29_ | 1.31748  | 0.397781 | 0.491867 | 0.636026 | 0.541503 | UP   | 364.2695 | 364.2691 |
| 7531 | M313T28  | 1.498787 | -0.5838  | -0.50238 | 0.636205 | 0.541559 | DOWN | 313.2352 | 313.2345 |
| 7532 | M415T22_ | 1.177381 | 0.235581 | 0.503678 | 0.636514 | 0.541656 | UP   | 415.289  | 415.2884 |
| 7533 | M476T33  | 1.278612 | 0.354579 | 0.497112 | 0.636558 | 0.54167  | UP   | 475.8489 | 475.8487 |
| 7534 | M466T20_ | 1.399463 | 0.484873 | 0.49284  | 0.636583 | 0.541678 | UP   | 466.3743 | 466.3735 |
| 7535 | M358T22  | 1.356638 | 0.440036 | 0.49953  | 0.636676 | 0.541707 | UP   | 357.9913 | 357.9912 |
| 7536 | M330T16  | 1.290256 | 0.367657 | 0.49266  | 0.636706 | 0.541717 | UP   | 330.1738 | 330.1736 |
| 7537 | M323T32_ | 1.259814 | 0.333211 | 0.492849 | 0.636709 | 0.541717 | UP   | 323.2987 | 323.2981 |
| 7538 | M432T17  | 1.304041 | 0.382989 | 0.491581 | 0.636773 | 0.541738 | UP   | 432.202  | 432.2011 |
| 7539 | M380T26  | 1.328992 | 0.410333 | 0.492435 | 0.636947 | 0.541792 | UP   | 380.2951 | 380.2941 |
| 7540 | M669T30  | 1.400454 | -0.48589 | -0.49424 | 0.637033 | 0.541819 | DOWN | 669.2735 | 669.2724 |
| 7541 | M310T23  | 1.409868 | 0.49556  | 0.4939   | 0.637346 | 0.541917 | UP   | 310.1103 | 310.1101 |
| 7542 | M457T9_4 | 1.31677  | 0.397003 | 0.496149 | 0.637399 | 0.541934 | UP   | 457.1703 | 457.1684 |
| 7543 | M639T9   | 1.593078 | 0.671817 | 0.48983  | 0.637428 | 0.541943 | UP   | 639.4511 | 639.45   |
| 7544 | M368T28  | 1.472769 | 0.558531 | 0.490103 | 0.637507 | 0.541967 | UP   | 368.0073 | 368.007  |
| 7545 | M333T10_ | 1.882082 | -0.91233 | -0.50386 | 0.637608 | 0.541999 | DOWN | 333.1403 | 333.1396 |
| 7546 | M416T26_ | 1.381751 | -0.4665  | -0.49868 | 0.637625 | 0.542004 | DOWN | 416.3202 | 416.3196 |
| 7547 | M398T23_ | 1.462808 | -0.54874 | -0.50081 | 0.637766 | 0.542049 | DOWN | 398.1146 | 398.1143 |
| 7548 | M344T27_ | 1.373436 | 0.457789 | 0.489299 | 0.637811 | 0.542063 | UP   | 344.295  | 344.2946 |
| 7549 | M1050T10 | 1.340686 | 0.422971 | 0.492026 | 0.637921 | 0.542097 | UP   | 1050.228 | 1050.223 |
| 7550 | M793T32  | 1.338471 | 0.420585 | 0.490703 | 0.637991 | 0.542119 | UP   | 792.5596 | 792.5589 |
| 7551 | M385T16_ | 1.475317 | 0.561025 | 0.489289 | 0.637998 | 0.542121 | UP   | 385.11   | 385.1099 |
| 7552 | M436T9   | 1.300079 | -0.3786  | -0.48888 | 0.638111 | 0.542156 | DOWN | 436.337  | 436.3359 |
| 7553 | M284T9   | 1.147831 | 0.198911 | 0.489237 | 0.638171 | 0.542175 | UP   | 283.9968 | 283.9968 |
| 7554 | M935T11_ | 1.5557   | 0.637564 | 0.490774 | 0.638295 | 0.542214 | UP   | 934.9972 | 934.9959 |
| 7555 | M704T10_ | 1.445852 | 0.53192  | 0.488681 | 0.638316 | 0.542221 | UP   | 703.5002 | 703.4993 |
| 7556 | M235T18  | 1.375234 | 0.459677 | 0.488699 | 0.638395 | 0.542245 | UP   | 235.0631 | 235.0628 |
| 7557 | M482T29  | 1.270487 | -0.34538 | -0.49355 | 0.638494 | 0.542276 | DOWN | 482.3242 | 482.3234 |
| 7558 | M271T21  | 1.291857 | 0.369446 | 0.489657 | 0.638539 | 0.54229  | UP   | 271.206  | 271.2052 |
| 7559 | M687T21_ | 1.461381 | 0.547332 | 0.491385 | 0.638598 | 0.542309 | UP   | 686.5059 | 686.5043 |
| 7560 | M253T9   | 1.55991  | 0.641462 | 0.488892 | 0.638638 | 0.542322 | UP   | 253.1376 | 253.1368 |
| 7561 | M274T22_ | 1.447649 | -0.53371 | -0.49911 | 0.638938 | 0.542415 | DOWN | 274.0953 | 274.0948 |
| 7562 | M299T18_ | 1.227988 | -0.2963  | -0.48721 | 0.639186 | 0.542493 | DOWN | 299.1061 | 299.1057 |
| 7563 | M503T32  | 1.484559 | 0.570035 | 0.488535 | 0.63923  | 0.542506 | UP   | 503.0888 | 503.0885 |
| 7564 | M461T44_ | 1.060381 | 0.084582 | 0.490982 | 0.639258 | 0.542515 | UP   | 460.8474 | 460.8467 |
| 7565 | M616T32  | 1.346407 | 0.429115 | 0.490073 | 0.639358 | 0.542546 | UP   | 616.4544 | 616.4536 |
| 7566 | M455T37  | 1.244549 | 0.315623 | 0.487706 | 0.6395   | 0.542591 | UP   | 455.4289 | 455.428  |

|      |          |          |          |          |          |          |      |          |          |
|------|----------|----------|----------|----------|----------|----------|------|----------|----------|
| 7567 | M570T29  | 1.325056 | -0.40605 | -0.49324 | 0.63955  | 0.542606 | DOWN | 570.3465 | 570.3455 |
| 7568 | M324T9_2 | 1.442376 | -0.52845 | -0.4867  | 0.639559 | 0.542609 | DOWN | 323.8622 | 323.8619 |
| 7569 | M234T16_ | 1.298028 | 0.376321 | 0.486617 | 0.639584 | 0.542617 | UP   | 234.0852 | 234.085  |
| 7570 | M302T33  | 1.230477 | 0.299218 | 0.486058 | 0.640325 | 0.542848 | UP   | 302.2195 | 302.2194 |
| 7571 | M283T30  | 1.379074 | -0.4637  | -0.48559 | 0.640758 | 0.542983 | DOWN | 283.1495 | 283.1488 |
| 7572 | M255T32  | 1.295332 | 0.373322 | 0.499036 | 0.640909 | 0.543029 | UP   | 255.1044 | 255.1043 |
| 7573 | M692T30_ | 1.084972 | -0.11766 | -0.48714 | 0.641112 | 0.543093 | DOWN | 692.4674 | 692.4663 |
| 7574 | M236T28  | 1.343466 | 0.42596  | 0.484359 | 0.641121 | 0.543095 | UP   | 236.0563 | 236.0559 |
| 7575 | M486T29  | 1.334231 | 0.416009 | 0.485655 | 0.641194 | 0.543118 | UP   | 486.3907 | 486.39   |
| 7576 | M705T32  | 1.330835 | 0.412332 | 0.484596 | 0.641283 | 0.543146 | UP   | 704.5072 | 704.506  |
| 7577 | M412T19_ | 1.414399 | 0.500189 | 0.484097 | 0.641317 | 0.543156 | UP   | 412.0515 | 412.0506 |
| 7578 | M384T26  | 1.32927  | 0.410634 | 0.485185 | 0.641367 | 0.543172 | UP   | 384.3475 | 384.3468 |
| 7579 | M427T9   | 1.576063 | 0.656325 | 0.485931 | 0.641529 | 0.543222 | UP   | 427.1532 | 427.1521 |
| 7580 | M475T33_ | 1.264249 | 0.338281 | 0.486987 | 0.641586 | 0.54324  | UP   | 475.3473 | 475.3464 |
| 7581 | M478T9_2 | 1.367034 | -0.45105 | -0.4881  | 0.641602 | 0.543245 | DOWN | 477.739  | 477.7381 |
| 7582 | M480T32_ | 1.408468 | -0.49413 | -0.49318 | 0.641689 | 0.543272 | DOWN | 480.3085 | 480.3079 |
| 7583 | M233T35  | 1.308037 | -0.3874  | -0.49186 | 0.641778 | 0.5433   | DOWN | 233.1536 | 233.1534 |
| 7584 | M311T26  | 1.357916 | 0.441394 | 0.488724 | 0.641875 | 0.54333  | UP   | 311.1268 | 311.1259 |
| 7585 | M611T29_ | 1.472312 | 0.558083 | 0.484191 | 0.642103 | 0.543401 | UP   | 610.761  | 610.7604 |
| 7586 | M593T10_ | 1.602433 | 0.680264 | 0.482685 | 0.642251 | 0.543446 | UP   | 593.2166 | 593.2095 |
| 7587 | M418T23_ | 1.26897  | 0.343658 | 0.485925 | 0.64232  | 0.543468 | UP   | 417.678  | 417.6772 |
| 7588 | M708T9_1 | 1.540457 | 0.623359 | 0.482064 | 0.642853 | 0.543633 | UP   | 707.5369 | 707.5361 |
| 7589 | M410T24_ | 1.432438 | -0.51847 | -0.48676 | 0.643209 | 0.543743 | DOWN | 410.1472 | 410.1423 |
| 7590 | M434T11_ | 1.463504 | 0.549427 | 0.482946 | 0.643438 | 0.543814 | UP   | 433.7031 | 433.7021 |
| 7591 | M226T31  | 1.290367 | -0.36778 | -0.48452 | 0.643496 | 0.543832 | DOWN | 226.18   | 226.1799 |
| 7592 | M380T16  | 1.231456 | 0.300365 | 0.488218 | 0.643633 | 0.543875 | UP   | 380.1521 | 380.1507 |
| 7593 | M678T27  | 1.514226 | -0.59858 | -0.48197 | 0.643857 | 0.543944 | DOWN | 678.2019 | 678.2008 |
| 7594 | M294T18_ | 1.395305 | -0.48058 | -0.49104 | 0.644137 | 0.544031 | DOWN | 294.0675 | 294.059  |
| 7595 | M265T28  | 1.389191 | -0.47425 | -0.48774 | 0.644225 | 0.544058 | DOWN | 265.2568 | 265.2561 |
| 7596 | M712T9   | 1.436276 | 0.522333 | 0.48297  | 0.644441 | 0.544125 | UP   | 712.0112 | 712.0102 |
| 7597 | M525T32_ | 1.39925  | -0.48465 | -0.48372 | 0.644627 | 0.544182 | DOWN | 525.1375 | 525.1364 |
| 7598 | M486T10  | 1.35801  | 0.441494 | 0.47899  | 0.645086 | 0.544324 | UP   | 486.3542 | 486.3524 |
| 7599 | M340T31  | 1.385963 | 0.470889 | 0.48321  | 0.645128 | 0.544337 | UP   | 340.321  | 340.3207 |
| 7600 | M518T44  | 1.086259 | 0.119368 | 0.482323 | 0.645237 | 0.54437  | UP   | 518.3742 | 518.3735 |
| 7601 | M589T22  | 1.409755 | 0.495444 | 0.48171  | 0.64527  | 0.54438  | UP   | 589.0495 | 589.0483 |
| 7602 | M729T10  | 1.459711 | 0.545683 | 0.479663 | 0.645429 | 0.544429 | UP   | 729.4737 | 729.4722 |
| 7603 | M311T17_ | 1.379034 | 0.463658 | 0.48148  | 0.64554  | 0.544464 | UP   | 311.0943 | 311.0941 |
| 7604 | M232T22_ | 1.098596 | -0.13566 | -0.47779 | 0.645581 | 0.544476 | DOWN | 232.1628 | 232.1623 |
| 7605 | M401T29  | 1.35149  | -0.43455 | -0.48349 | 0.645623 | 0.544489 | DOWN | 401.2874 | 401.2868 |
| 7606 | M274T22_ | 1.247399 | 0.318923 | 0.477342 | 0.646    | 0.544605 | UP   | 274.0506 | 274.0505 |
| 7607 | M182T21  | 1.380981 | 0.465693 | 0.477008 | 0.646124 | 0.544644 | UP   | 182.0721 | 182.072  |
| 7608 | M415T17  | 1.495422 | 0.580553 | 0.47846  | 0.646324 | 0.544705 | UP   | 415.0477 | 415.0471 |
| 7609 | M964T32  | 1.411266 | -0.49699 | -0.488   | 0.646522 | 0.544766 | DOWN | 964.4394 | 964.439  |
| 7610 | M581T31  | 1.256381 | -0.32927 | -0.47891 | 0.64653  | 0.544769 | DOWN | 581.2981 | 581.2943 |
| 7611 | M761T29  | 1.267084 | 0.341512 | 0.476277 | 0.646613 | 0.544794 | UP   | 761.1802 | 761.1795 |
| 7612 | M314T10  | 1.339945 | 0.422174 | 0.476354 | 0.646708 | 0.544823 | UP   | 314.1294 | 314.1291 |
| 7613 | M325T24  | 1.559634 | -0.64121 | -0.49244 | 0.646807 | 0.544854 | DOWN | 325.1395 | 325.1388 |

|      |          |          |          |          |          |          |      |          |          |
|------|----------|----------|----------|----------|----------|----------|------|----------|----------|
| 7614 | M253T25  | 1.418891 | -0.50476 | -0.4829  | 0.647065 | 0.544933 | DOWN | 253.2641 | 253.2637 |
| 7615 | M197T17  | 1.449971 | -0.53602 | -0.48706 | 0.647234 | 0.544985 | DOWN | 196.5711 | 196.571  |
| 7616 | M473T20_ | 1.332888 | -0.41456 | -0.47707 | 0.647262 | 0.544994 | DOWN | 473.3039 | 473.3006 |
| 7617 | M245T15  | 1.26889  | 0.343567 | 0.476863 | 0.647336 | 0.545016 | UP   | 245.1943 | 245.1937 |
| 7618 | M413T25  | 1.339677 | 0.421885 | 0.484569 | 0.647396 | 0.545035 | UP   | 413.1627 | 413.1622 |
| 7619 | M456T23  | 1.402359 | 0.487856 | 0.475907 | 0.647441 | 0.545049 | UP   | 456.3533 | 456.3528 |
| 7620 | M383T30  | 1.050332 | 0.070846 | 0.474645 | 0.647896 | 0.545188 | UP   | 383.2795 | 383.2787 |
| 7621 | M383T18  | 1.672572 | 0.742068 | 0.481496 | 0.64812  | 0.545257 | UP   | 383.1761 | 383.1748 |
| 7622 | M507T23_ | 1.330601 | 0.412078 | 0.474022 | 0.648188 | 0.545278 | UP   | 507.3426 | 507.3421 |
| 7623 | M255T37  | 1.110256 | -0.15089 | -0.48745 | 0.648203 | 0.545283 | DOWN | 255.2107 | 255.2106 |
| 7624 | M981T11  | 1.501163 | 0.58608  | 0.478805 | 0.648398 | 0.545342 | UP   | 981.4709 | 981.4687 |
| 7625 | M775T41  | 1.20676  | -0.27114 | -0.48085 | 0.64847  | 0.545364 | DOWN | 775.4498 | 775.4484 |
| 7626 | M253T22_ | 1.382936 | 0.467735 | 0.474202 | 0.648647 | 0.545419 | UP   | 252.913  | 252.9129 |
| 7627 | M580T32  | 1.272766 | -0.34797 | -0.47738 | 0.648726 | 0.545443 | DOWN | 580.2719 | 580.2705 |
| 7628 | M271T20  | 1.363197 | 0.446994 | 0.473276 | 0.648729 | 0.545444 | UP   | 271.0995 | 271.0992 |
| 7629 | M184T28  | 1.328297 | -0.40958 | -0.47969 | 0.64886  | 0.545484 | DOWN | 184.0732 | 184.0731 |
| 7630 | M410T27  | 1.354669 | 0.437941 | 0.474345 | 0.648906 | 0.545498 | UP   | 410.1416 | 410.1411 |
| 7631 | M199T30  | 1.319407 | 0.399889 | 0.473146 | 0.648973 | 0.545518 | UP   | 199.073  | 199.0726 |
| 7632 | M356T11  | 1.630576 | 0.705382 | 0.472892 | 0.649    | 0.545527 | UP   | 355.9725 | 355.9721 |
| 7633 | M643T29_ | 1.34933  | -0.43224 | -0.47425 | 0.649045 | 0.545541 | DOWN | 643.2583 | 643.2564 |
| 7634 | M509T32_ | 1.312072 | 0.391847 | 0.473617 | 0.649086 | 0.545553 | UP   | 509.3686 | 509.3682 |
| 7635 | M397T32_ | 1.440417 | -0.52649 | -0.48404 | 0.6491   | 0.545557 | DOWN | 397.2932 | 397.2929 |
| 7636 | M731T21  | 1.506839 | 0.591526 | 0.476842 | 0.649171 | 0.545579 | UP   | 730.5328 | 730.5317 |
| 7637 | M1188T11 | 1.504642 | 0.58942  | 0.477218 | 0.649214 | 0.545592 | UP   | 1187.566 | 1187.564 |
| 7638 | M509T9   | 1.527464 | 0.611138 | 0.476472 | 0.649334 | 0.545629 | UP   | 509.2632 | 509.2615 |
| 7639 | M370T34  | 1.558494 | -0.64015 | -0.48797 | 0.64938  | 0.545643 | DOWN | 370.1284 | 370.1281 |
| 7640 | M275T27_ | 1.343524 | 0.426022 | 0.475684 | 0.64963  | 0.54572  | UP   | 274.6256 | 274.6251 |
| 7641 | M369T38_ | 1.29812  | 0.376424 | 0.473457 | 0.649637 | 0.545722 | UP   | 369.2427 | 369.2418 |
| 7642 | M249T28  | 1.299773 | -0.37826 | -0.48029 | 0.650003 | 0.545834 | DOWN | 249.2335 | 249.2333 |
| 7643 | M690T29  | 1.440826 | -0.5269  | -0.47954 | 0.65013  | 0.545872 | DOWN | 690.2472 | 690.2459 |
| 7644 | M402T40  | 1.271092 | 0.346069 | 0.471227 | 0.650155 | 0.54588  | UP   | 402.2932 | 402.2924 |
| 7645 | M599T28  | 1.636028 | -0.7102  | -0.47121 | 0.650161 | 0.545882 | DOWN | 599.0778 | 599.0772 |
| 7646 | M556T45  | 1.130146 | -0.17651 | -0.47884 | 0.650205 | 0.545895 | DOWN | 556.2965 | 556.2955 |
| 7647 | M717T26  | 1.507911 | 0.592551 | 0.480035 | 0.650276 | 0.545917 | UP   | 717.0053 | 717.005  |
| 7648 | M525T7   | 1.647745 | 0.720493 | 0.473451 | 0.650281 | 0.545918 | UP   | 525.288  | 525.2875 |
| 7649 | M326T33  | 1.345584 | -0.42823 | -0.47739 | 0.650293 | 0.545922 | DOWN | 326.2692 | 326.2689 |
| 7650 | M488T42_ | 1.153197 | -0.20564 | -0.4855  | 0.650605 | 0.546017 | DOWN | 488.2696 | 488.269  |
| 7651 | M377T21  | 1.285102 | 0.361883 | 0.471207 | 0.650679 | 0.54604  | UP   | 377.2692 | 377.2686 |
| 7652 | M434T33  | 1.137912 | -0.18639 | -0.47802 | 0.650692 | 0.546044 | DOWN | 434.2121 | 434.2116 |
| 7653 | M502T9   | 1.492508 | 0.577738 | 0.472859 | 0.650696 | 0.546045 | UP   | 502.4022 | 502.3933 |
| 7654 | M725T9_2 | 1.54003  | 0.622959 | 0.470319 | 0.650711 | 0.54605  | UP   | 724.5616 | 724.5594 |
| 7655 | M362T19_ | 1.433446 | 0.519487 | 0.470511 | 0.650722 | 0.546053 | UP   | 362.1053 | 362.1051 |
| 7656 | M400T23  | 1.388552 | 0.473581 | 0.471283 | 0.650909 | 0.54611  | UP   | 399.9974 | 399.9971 |
| 7657 | M318T20_ | 1.350795 | 0.433809 | 0.469758 | 0.651287 | 0.546225 | UP   | 318.1085 | 318.1084 |
| 7658 | M168T28  | 1.318529 | 0.39893  | 0.469608 | 0.651324 | 0.546237 | UP   | 167.9937 | 167.9933 |
| 7659 | M723T9   | 1.550372 | 0.632614 | 0.469479 | 0.651324 | 0.546237 | UP   | 723.4602 | 723.4579 |
| 7660 | M163T22  | 1.183389 | -0.24292 | -0.47179 | 0.651798 | 0.546381 | DOWN | 163.133  | 163.1329 |

|      |          |          |          |          |          |          |      |          |          |
|------|----------|----------|----------|----------|----------|----------|------|----------|----------|
| 7661 | M275T20  | 1.359917 | 0.443519 | 0.470031 | 0.651865 | 0.546401 | UP   | 275.1604 | 275.1597 |
| 7662 | M420T27  | 1.190924 | -0.25208 | -0.47064 | 0.65194  | 0.546424 | DOWN | 420.3473 | 420.347  |
| 7663 | M327T40  | 1.306403 | 0.3856   | 0.467807 | 0.652415 | 0.546569 | UP   | 327.2168 | 327.2163 |
| 7664 | M457T24_ | 1.297022 | -0.3752  | -0.47349 | 0.652743 | 0.546669 | DOWN | 457.1796 | 457.1793 |
| 7665 | M492T34  | 1.560512 | 0.642019 | 0.469005 | 0.653052 | 0.546762 | UP   | 492.0768 | 492.0766 |
| 7666 | M210T10_ | 1.383519 | 0.468342 | 0.468712 | 0.653113 | 0.546781 | UP   | 210.1492 | 210.1484 |
| 7667 | M752T44  | 1.122964 | 0.167312 | 0.466704 | 0.653383 | 0.546863 | UP   | 752.3889 | 752.388  |
| 7668 | M455T27_ | 1.249797 | -0.32169 | -0.46842 | 0.653402 | 0.546869 | DOWN | 455.3327 | 455.3319 |
| 7669 | M274T32_ | 1.283935 | 0.360572 | 0.466839 | 0.653417 | 0.546873 | UP   | 274.2095 | 274.2091 |
| 7670 | M253T30  | 1.249512 | -0.32136 | -0.47245 | 0.653476 | 0.546891 | DOWN | 253.1951 | 253.1949 |
| 7671 | M364T17_ | 1.186377 | -0.24656 | -0.46654 | 0.653582 | 0.546924 | DOWN | 363.9968 | 363.9967 |
| 7672 | M617T29  | 1.310988 | 0.390655 | 0.467267 | 0.653697 | 0.546958 | UP   | 617.4669 | 617.4657 |
| 7673 | M828T11  | 1.522966 | 0.606884 | 0.465979 | 0.653713 | 0.546963 | UP   | 828.3589 | 828.3575 |
| 7674 | M265T21  | 1.389795 | 0.474872 | 0.470773 | 0.653863 | 0.547009 | UP   | 265.1002 | 265.0999 |
| 7675 | M323T11  | 1.450442 | 0.536493 | 0.467971 | 0.653931 | 0.547029 | UP   | 322.979  | 322.9785 |
| 7676 | M460T34_ | 1.353122 | -0.43629 | -0.46909 | 0.654245 | 0.547125 | DOWN | 460.1966 | 460.1961 |
| 7677 | M227T27  | 1.355816 | 0.439161 | 0.46616  | 0.65429  | 0.547138 | UP   | 226.5893 | 226.5893 |
| 7678 | M218T10  | 1.53613  | 0.6193   | 0.466024 | 0.654368 | 0.547162 | UP   | 217.9902 | 217.9893 |
| 7679 | M329T32  | 1.252455 | -0.32476 | -0.46529 | 0.654738 | 0.547274 | DOWN | 329.2324 | 329.2322 |
| 7680 | M641T17_ | 1.257453 | 0.330505 | 0.46382  | 0.655137 | 0.547394 | UP   | 641.462  | 641.4606 |
| 7681 | M200T20  | 1.184396 | 0.244151 | 0.466015 | 0.65521  | 0.547417 | UP   | 200.1729 | 200.1727 |
| 7682 | M461T29_ | 1.30447  | -0.38346 | -0.46622 | 0.655295 | 0.547442 | DOWN | 461.2878 | 461.2873 |
| 7683 | M274T19_ | 1.438201 | 0.524265 | 0.462968 | 0.655859 | 0.547613 | UP   | 274.0527 | 274.0526 |
| 7684 | M456T12_ | 1.427557 | 0.513549 | 0.476541 | 0.656141 | 0.547698 | UP   | 456.3182 | 456.3178 |
| 7685 | M298T30_ | 1.808876 | 0.855094 | 0.465738 | 0.656141 | 0.547698 | UP   | 297.9782 | 297.978  |
| 7686 | M600T29_ | 1.215829 | 0.28194  | 0.463433 | 0.65622  | 0.547722 | UP   | 600.2677 | 600.2672 |
| 7687 | M585T29  | 1.221194 | -0.28829 | -0.46449 | 0.656524 | 0.547814 | DOWN | 585.2525 | 585.2522 |
| 7688 | M568T35  | 1.691884 | 0.758631 | 0.476642 | 0.656645 | 0.54785  | UP   | 568.4573 | 568.4564 |
| 7689 | M316T23_ | 1.461054 | -0.54701 | -0.47308 | 0.656675 | 0.547859 | DOWN | 316.1941 | 316.1938 |
| 7690 | M210T9_1 | 1.303552 | -0.38245 | -0.46473 | 0.656819 | 0.547902 | DOWN | 210.1491 | 210.1484 |
| 7691 | M451T27_ | 1.34263  | 0.425062 | 0.462162 | 0.657039 | 0.547969 | UP   | 451.1683 | 451.1675 |
| 7692 | M236T27  | 1.289801 | 0.367148 | 0.461388 | 0.657105 | 0.547989 | UP   | 236.1727 | 236.1726 |
| 7693 | M456T9_2 | 1.289845 | 0.367197 | 0.466002 | 0.657199 | 0.548017 | UP   | 456.1577 | 456.156  |
| 7694 | M501T20  | 1.285017 | 0.361787 | 0.461837 | 0.657281 | 0.548042 | UP   | 501.4012 | 501.4    |
| 7695 | M319T20_ | 1.363794 | 0.447626 | 0.460524 | 0.657492 | 0.548105 | UP   | 319.1056 | 319.1053 |
| 7696 | M441T29  | 1.300485 | 0.37905  | 0.461694 | 0.657537 | 0.548119 | UP   | 441.3617 | 441.3607 |
| 7697 | M472T21  | 1.385974 | 0.4709   | 0.459668 | 0.657991 | 0.548256 | UP   | 472.2152 | 472.2093 |
| 7698 | M216T16  | 1.241232 | 0.311773 | 0.460039 | 0.658055 | 0.548275 | UP   | 216.1385 | 216.138  |
| 7699 | M269T17  | 1.348496 | -0.43135 | -0.46883 | 0.658186 | 0.548314 | DOWN | 269.1474 | 269.1467 |
| 7700 | M503T9_1 | 1.366634 | 0.450627 | 0.459531 | 0.658233 | 0.548329 | UP   | 502.9049 | 502.9038 |
| 7701 | M458T15  | 1.444628 | 0.530698 | 0.45951  | 0.658431 | 0.548388 | UP   | 458.1911 | 458.1906 |
| 7702 | M382T23_ | 1.307158 | 0.386434 | 0.459571 | 0.658614 | 0.548443 | UP   | 382.2956 | 382.2953 |
| 7703 | M692T30_ | 1.376835 | -0.46136 | -0.46069 | 0.65877  | 0.54849  | DOWN | 692.2624 | 692.2618 |
| 7704 | M380T23_ | 1.300053 | 0.37857  | 0.460243 | 0.658782 | 0.548494 | UP   | 380.2951 | 380.2948 |
| 7705 | M272T21  | 1.246383 | 0.317747 | 0.458391 | 0.659122 | 0.548595 | UP   | 272.2094 | 272.2093 |
| 7706 | M484T16  | 1.528569 | 0.612182 | 0.460396 | 0.659365 | 0.548668 | UP   | 484.1084 | 484.1082 |
| 7707 | M500T25  | 1.288591 | 0.365794 | 0.461474 | 0.659968 | 0.548849 | UP   | 500.2038 | 500.2031 |

|      |          |          |          |          |          |          |      |          |          |
|------|----------|----------|----------|----------|----------|----------|------|----------|----------|
| 7708 | M646T22  | 1.34483  | 0.427424 | 0.456634 | 0.660112 | 0.548893 | UP   | 646.4384 | 646.438  |
| 7709 | M305T28_ | 1.376581 | -0.46109 | -0.46465 | 0.660122 | 0.548895 | DOWN | 305.2688 | 305.2682 |
| 7710 | M333T22_ | 1.313578 | 0.393502 | 0.45649  | 0.660188 | 0.548915 | UP   | 333.1704 | 333.17   |
| 7711 | M541T11_ | 1.434966 | 0.521017 | 0.458516 | 0.660318 | 0.548954 | UP   | 541.3731 | 541.3723 |
| 7712 | M161T24  | 1.334221 | -0.416   | -0.46408 | 0.660435 | 0.548989 | DOWN | 161.0597 | 161.0593 |
| 7713 | M255T28  | 1.264541 | -0.33861 | -0.46374 | 0.660764 | 0.549088 | DOWN | 255.2321 | 255.2316 |
| 7714 | M569T7   | 1.657685 | 0.72917  | 0.458599 | 0.660855 | 0.549115 | UP   | 569.3147 | 569.314  |
| 7715 | M177T19_ | 1.3798   | 0.464459 | 0.455757 | 0.660892 | 0.549126 | UP   | 176.5102 | 176.5101 |
| 7716 | M456T14  | 1.538659 | 0.621673 | 0.457566 | 0.660932 | 0.549138 | UP   | 456.077  | 456.0766 |
| 7717 | M306T23_ | 1.688267 | -0.75554 | -0.45893 | 0.661077 | 0.549181 | DOWN | 306.3244 | 306.32   |
| 7718 | M785T29  | 1.235766 | -0.30541 | -0.45783 | 0.661262 | 0.549237 | DOWN | 785.1807 | 785.1795 |
| 7719 | M221T26_ | 1.298389 | 0.376722 | 0.455565 | 0.661442 | 0.549291 | UP   | 221.1538 | 221.1534 |
| 7720 | M308T18  | 1.315787 | 0.395926 | 0.456556 | 0.661658 | 0.549355 | UP   | 308.2517 | 308.2513 |
| 7721 | M232T32  | 1.313027 | -0.3929  | -0.45716 | 0.661747 | 0.549381 | DOWN | 232.1696 | 232.1692 |
| 7722 | M390T9_1 | 1.298544 | -0.3769  | -0.45945 | 0.661752 | 0.549383 | DOWN | 389.5882 | 389.5877 |
| 7723 | M543T22_ | 1.363302 | 0.447106 | 0.457782 | 0.661855 | 0.549414 | UP   | 543.0435 | 543.042  |
| 7724 | M559T16  | 1.363409 | 0.447219 | 0.454902 | 0.662397 | 0.549576 | UP   | 559.4074 | 559.4068 |
| 7725 | M162T28  | 1.282154 | 0.358569 | 0.452956 | 0.662618 | 0.549641 | UP   | 162.0995 | 162.0995 |
| 7726 | M535T33  | 1.283859 | 0.360487 | 0.454837 | 0.662799 | 0.549696 | UP   | 535.0374 | 535.0371 |
| 7727 | M520T32_ | 1.356737 | -0.44014 | -0.45645 | 0.663054 | 0.549771 | DOWN | 519.5957 | 519.5947 |
| 7728 | M526T25  | 1.302942 | -0.38177 | -0.45278 | 0.663155 | 0.549802 | DOWN | 526.3124 | 526.3122 |
| 7729 | M325T31_ | 1.280883 | 0.357139 | 0.452384 | 0.663189 | 0.549812 | UP   | 325.3215 | 325.321  |
| 7730 | M653T27  | 1.470553 | -0.55636 | -0.46261 | 0.663236 | 0.549826 | DOWN | 652.9475 | 652.9468 |
| 7731 | M725T9_1 | 1.530828 | 0.614312 | 0.451915 | 0.663368 | 0.549865 | UP   | 724.5105 | 724.5086 |
| 7732 | M429T13  | 1.566017 | 0.6471   | 0.453295 | 0.663436 | 0.549885 | UP   | 428.9392 | 428.9391 |
| 7733 | M308T23_ | 1.237365 | 0.307271 | 0.451644 | 0.663731 | 0.549973 | UP   | 307.8522 | 307.8516 |
| 7734 | M340T29  | 1.615242 | 0.69175  | 0.460753 | 0.663975 | 0.550046 | UP   | 340.139  | 340.1387 |
| 7735 | M960T11  | 1.452143 | 0.538184 | 0.454892 | 0.663986 | 0.550049 | UP   | 960.4519 | 960.4515 |
| 7736 | M325T28_ | 1.295094 | -0.37306 | -0.4567  | 0.664046 | 0.550067 | DOWN | 325.1435 | 325.1433 |
| 7737 | M313T38  | 1.230513 | 0.29926  | 0.461732 | 0.664096 | 0.550082 | UP   | 313.1799 | 313.1795 |
| 7738 | M663T21_ | 1.35818  | 0.441674 | 0.451747 | 0.664204 | 0.550114 | UP   | 662.9925 | 662.9918 |
| 7739 | M216T22  | 1.311694 | 0.391432 | 0.451102 | 0.66422  | 0.550118 | UP   | 216.0191 | 216.019  |
| 7740 | M454T9_1 | 1.348257 | 0.431095 | 0.450766 | 0.664222 | 0.550119 | UP   | 453.6011 | 453.5971 |
| 7741 | M251T11_ | 1.367393 | 0.451428 | 0.45135  | 0.664462 | 0.550191 | UP   | 251.0684 | 251.068  |
| 7742 | M444T35  | 1.360117 | 0.44373  | 0.450896 | 0.664594 | 0.55023  | UP   | 444.117  | 444.1164 |
| 7743 | M654T11  | 1.506487 | 0.591188 | 0.450111 | 0.664639 | 0.550243 | UP   | 654.2467 | 654.246  |
| 7744 | M379T26_ | 1.299907 | 0.378409 | 0.450622 | 0.664825 | 0.550298 | UP   | 379.1865 | 379.186  |
| 7745 | M317T11  | 1.582149 | 0.661885 | 0.449882 | 0.664826 | 0.550298 | UP   | 316.9411 | 316.9408 |
| 7746 | M771T10_ | 1.384686 | 0.469559 | 0.449362 | 0.665185 | 0.550405 | UP   | 770.9569 | 770.9561 |
| 7747 | M392T20  | 1.460331 | -0.5463  | -0.45784 | 0.665277 | 0.550432 | DOWN | 392.137  | 392.1361 |
| 7748 | M194T31  | 1.263992 | 0.337987 | 0.448844 | 0.665495 | 0.550497 | UP   | 194.0093 | 194.0089 |
| 7749 | M423T18_ | 1.286591 | -0.36355 | -0.44875 | 0.665519 | 0.550504 | DOWN | 423.1753 | 423.1752 |
| 7750 | M397T23_ | 1.350631 | -0.43363 | -0.45624 | 0.665698 | 0.550557 | DOWN | 397.1113 | 397.1106 |
| 7751 | M618T29  | 1.307804 | 0.387146 | 0.449471 | 0.665718 | 0.550563 | UP   | 618.4697 | 618.4688 |
| 7752 | M573T17  | 1.437484 | 0.523546 | 0.454889 | 0.665792 | 0.550585 | UP   | 572.9445 | 572.9443 |
| 7753 | M461T29_ | 1.273747 | 0.349079 | 0.449373 | 0.665857 | 0.550604 | UP   | 461.3738 | 461.3731 |
| 7754 | M420T12_ | 1.285122 | 0.361906 | 0.448664 | 0.665894 | 0.550615 | UP   | 420.2748 | 420.2739 |

|      |          |          |          |          |          |          |      |          |          |
|------|----------|----------|----------|----------|----------|----------|------|----------|----------|
| 7755 | M291T28_ | 1.287142 | 0.364172 | 0.448696 | 0.6659   | 0.550617 | UP   | 291.2532 | 291.2528 |
| 7756 | M748T11  | 1.406392 | 0.491999 | 0.448302 | 0.665902 | 0.550618 | UP   | 748.4132 | 748.4112 |
| 7757 | M319T34  | 1.13622  | 0.184242 | 0.448222 | 0.665913 | 0.550621 | UP   | 319.2482 | 319.2477 |
| 7758 | M426T26  | 1.484251 | -0.56974 | -0.45696 | 0.665951 | 0.550632 | DOWN | 426.02   | 426.0195 |
| 7759 | M333T27_ | 1.328964 | -0.4103  | -0.45437 | 0.666062 | 0.550665 | DOWN | 333.0964 | 333.0958 |
| 7760 | M175T20  | 1.301576 | 0.38026  | 0.450817 | 0.66619  | 0.550703 | UP   | 175.0642 | 175.064  |
| 7761 | M563T18_ | 1.377141 | 0.461676 | 0.448325 | 0.666264 | 0.550725 | UP   | 563.0181 | 563.0175 |
| 7762 | M604T30  | 1.074959 | 0.104281 | 0.447904 | 0.666307 | 0.550738 | UP   | 604.4135 | 604.4131 |
| 7763 | M313T19_ | 1.250523 | -0.32253 | -0.45166 | 0.666311 | 0.550739 | DOWN | 313.1043 | 313.1038 |
| 7764 | M394T20_ | 1.478777 | -0.5644  | -0.45582 | 0.666483 | 0.55079  | DOWN | 394.1324 | 394.132  |
| 7765 | M822T31  | 1.403043 | 0.488559 | 0.452515 | 0.666796 | 0.550882 | UP   | 822.1197 | 822.1193 |
| 7766 | M219T20  | 1.380531 | -0.46522 | -0.45571 | 0.666884 | 0.550908 | DOWN | 219.1745 | 219.1744 |
| 7767 | M163T6   | 1.241646 | -0.31225 | -0.45618 | 0.667167 | 0.550992 | DOWN | 162.9734 | 162.9733 |
| 7768 | M569T10  | 1.290438 | 0.367861 | 0.446136 | 0.667494 | 0.551089 | UP   | 569.4751 | 569.4745 |
| 7769 | M394T28_ | 1.294424 | 0.37231  | 0.446017 | 0.667762 | 0.551168 | UP   | 394.3105 | 394.3097 |
| 7770 | M597T28  | 1.576453 | -0.65668 | -0.44561 | 0.667808 | 0.551181 | DOWN | 597.08   | 597.0785 |
| 7771 | M166T26  | 1.321282 | 0.401938 | 0.447998 | 0.667915 | 0.551213 | UP   | 166.0944 | 166.0941 |
| 7772 | M787T32  | 1.176553 | 0.234566 | 0.443899 | 0.668916 | 0.551508 | UP   | 786.5219 | 786.521  |
| 7773 | M398T13  | 1.273704 | 0.34903  | 0.444136 | 0.668924 | 0.55151  | UP   | 398.083  | 398.082  |
| 7774 | M446T16  | 1.175741 | 0.23357  | 0.443746 | 0.669022 | 0.551539 | UP   | 446.2235 | 446.2231 |
| 7775 | M542T36  | 1.189345 | 0.250168 | 0.444486 | 0.669265 | 0.551611 | UP   | 542.4325 | 542.4317 |
| 7776 | M405T39  | 1.223444 | 0.290948 | 0.449319 | 0.669385 | 0.551646 | UP   | 405.1958 | 405.1949 |
| 7777 | M476T9_4 | 1.29646  | -0.37458 | -0.44509 | 0.669389 | 0.551648 | DOWN | 476.3279 | 476.3269 |
| 7778 | M163T10  | 1.262937 | 0.336782 | 0.443502 | 0.669525 | 0.551687 | UP   | 163.1232 | 163.123  |
| 7779 | M493T10  | 1.518042 | -0.60221 | -0.45469 | 0.669605 | 0.551711 | DOWN | 493.1582 | 493.1576 |
| 7780 | M761T34  | 1.295851 | 0.3739   | 0.444159 | 0.669797 | 0.551768 | UP   | 760.5427 | 760.541  |
| 7781 | M318T16  | 1.398214 | 0.483585 | 0.444523 | 0.669944 | 0.551811 | UP   | 318.0826 | 318.0825 |
| 7782 | M392T31  | 1.408767 | -0.49443 | -0.45165 | 0.669946 | 0.551811 | DOWN | 392.0922 | 392.092  |
| 7783 | M537T27  | 1.271769 | -0.34684 | -0.4462  | 0.670024 | 0.551834 | DOWN | 537.345  | 537.3444 |
| 7784 | M304T14  | 1.50192  | 0.586808 | 0.442278 | 0.670134 | 0.551867 | UP   | 304.0668 | 304.0667 |
| 7785 | M355T24  | 1.275323 | -0.35086 | -0.4522  | 0.670152 | 0.551872 | DOWN | 355.0842 | 355.0836 |
| 7786 | M177T21  | 1.227377 | 0.295578 | 0.444578 | 0.670171 | 0.551877 | UP   | 177.0799 | 177.0798 |
| 7787 | M435T33  | 1.312877 | -0.39273 | -0.44908 | 0.670251 | 0.551901 | DOWN | 435.1935 | 435.1934 |
| 7788 | M430T20_ | 1.261331 | 0.334946 | 0.442835 | 0.670267 | 0.551906 | UP   | 430.3166 | 430.3159 |
| 7789 | M393T9   | 1.353079 | -0.43625 | -0.4423  | 0.670268 | 0.551906 | DOWN | 393.2094 | 393.2092 |
| 7790 | M510T10  | 1.297655 | 0.375907 | 0.446062 | 0.670323 | 0.551922 | UP   | 510.2856 | 510.2853 |
| 7791 | M269T27  | 1.278203 | -0.35412 | -0.44968 | 0.670352 | 0.551931 | DOWN | 269.1901 | 269.1899 |
| 7792 | M403T14  | 1.27843  | 0.354373 | 0.441745 | 0.670437 | 0.551955 | UP   | 403.1025 | 403.1021 |
| 7793 | M330T36  | 1.100253 | 0.137836 | 0.446977 | 0.670554 | 0.55199  | UP   | 330.2124 | 330.2123 |
| 7794 | M353T38  | 1.276863 | 0.352604 | 0.452956 | 0.670582 | 0.551998 | UP   | 353.2647 | 353.2645 |
| 7795 | M277T11_ | 1.362543 | 0.446301 | 0.44035  | 0.671363 | 0.552227 | UP   | 277.1287 | 277.1284 |
| 7796 | M492T43  | 1.158996 | 0.212876 | 0.448382 | 0.671647 | 0.552311 | UP   | 492.2797 | 492.2792 |
| 7797 | M473T9_1 | 1.352703 | -0.43584 | -0.44325 | 0.671801 | 0.552356 | DOWN | 472.8192 | 472.8167 |
| 7798 | M880T32  | 1.308046 | 0.387414 | 0.440668 | 0.671961 | 0.552403 | UP   | 879.6095 | 879.609  |
| 7799 | M503T22  | 1.447579 | -0.53364 | -0.45421 | 0.672132 | 0.552453 | DOWN | 502.9639 | 502.9633 |
| 7800 | M459T26  | 1.443892 | 0.529962 | 0.448224 | 0.672171 | 0.552464 | UP   | 459.0527 | 459.0521 |
| 7801 | M415T20_ | 1.223734 | 0.29129  | 0.439122 | 0.672278 | 0.552495 | UP   | 415.2118 | 415.2108 |

|      |          |          |          |          |          |          |      |          |          |
|------|----------|----------|----------|----------|----------|----------|------|----------|----------|
| 7802 | M428T18  | 1.356681 | 0.440081 | 0.439868 | 0.673141 | 0.552748 | UP   | 428.0292 | 428.0286 |
| 7803 | M305T34  | 1.45528  | 0.541297 | 0.440249 | 0.67332  | 0.5528   | UP   | 305.1201 | 305.1196 |
| 7804 | M397T29_ | 1.281866 | 0.358245 | 0.438535 | 0.673454 | 0.552839 | UP   | 397.3354 | 397.3347 |
| 7805 | M356T21  | 1.271375 | 0.34639  | 0.439708 | 0.673471 | 0.552844 | UP   | 356.3164 | 356.3157 |
| 7806 | M330T18  | 1.417728 | -0.50358 | -0.44576 | 0.673541 | 0.552865 | DOWN | 330.2337 | 330.2332 |
| 7807 | M290T32_ | 1.29873  | 0.377101 | 0.437263 | 0.673626 | 0.552889 | UP   | 290.2327 | 290.2323 |
| 7808 | M572T18  | 1.279611 | 0.355706 | 0.437434 | 0.673988 | 0.552995 | UP   | 572.4012 | 572.4009 |
| 7809 | M241T18_ | 1.336207 | 0.418144 | 0.437307 | 0.67401  | 0.553002 | UP   | 241.0718 | 241.0711 |
| 7810 | M305T17  | 1.197256 | 0.259732 | 0.436342 | 0.674175 | 0.55305  | UP   | 305.171  | 305.1707 |
| 7811 | M570T35  | 1.268192 | 0.342773 | 0.437068 | 0.674223 | 0.553064 | UP   | 570.4578 | 570.4572 |
| 7812 | M313T27  | 1.493541 | -0.57874 | -0.44534 | 0.674289 | 0.553083 | DOWN | 312.9799 | 312.9795 |
| 7813 | M329T40  | 1.26487  | 0.33899  | 0.436298 | 0.674295 | 0.553085 | UP   | 329.2688 | 329.2687 |
| 7814 | M725T31_ | 1.350888 | 0.433908 | 0.439274 | 0.674343 | 0.553098 | UP   | 724.592  | 724.5911 |
| 7815 | M303T18  | 1.239902 | 0.310226 | 0.436002 | 0.674362 | 0.553104 | UP   | 303.2169 | 303.2163 |
| 7816 | M240T20_ | 1.285322 | -0.36213 | -0.43593 | 0.674416 | 0.55312  | DOWN | 240.1654 | 240.1651 |
| 7817 | M318T30_ | 1.454523 | 0.540546 | 0.442329 | 0.674589 | 0.55317  | UP   | 318.0424 | 318.0421 |
| 7818 | M694T27  | 1.301334 | 0.379991 | 0.440304 | 0.674646 | 0.553187 | UP   | 694.1747 | 694.1733 |
| 7819 | M393T19_ | 1.855585 | 0.891874 | 0.447213 | 0.674774 | 0.553224 | UP   | 393.3341 | 393.331  |
| 7820 | M360T19  | 1.269181 | 0.343898 | 0.437602 | 0.674795 | 0.55323  | UP   | 360.3264 | 360.3256 |
| 7821 | M500T34  | 1.347814 | -0.43062 | -0.44097 | 0.674805 | 0.553233 | DOWN | 499.8548 | 499.8541 |
| 7822 | M413T20  | 1.448906 | 0.534964 | 0.436964 | 0.675084 | 0.553314 | UP   | 412.9982 | 412.9975 |
| 7823 | M711T30  | 1.083898 | 0.116229 | 0.434787 | 0.675293 | 0.553375 | UP   | 711.4984 | 711.4975 |
| 7824 | M252T15  | 1.261674 | 0.335339 | 0.434609 | 0.676119 | 0.553615 | UP   | 252.1314 | 252.1308 |
| 7825 | M559T26  | 1.451249 | 0.537295 | 0.437042 | 0.676318 | 0.553673 | UP   | 559.0912 | 559.0906 |
| 7826 | M205T42  | 1.083021 | 0.115061 | 0.432941 | 0.676507 | 0.553728 | UP   | 205.0859 | 205.0855 |
| 7827 | M485T9_3 | 1.406778 | -0.49239 | -0.43644 | 0.676707 | 0.553786 | DOWN | 485.2971 | 485.2967 |
| 7828 | M277T18_ | 1.129044 | 0.175101 | 0.432605 | 0.677178 | 0.553923 | UP   | 277.2012 | 277.2007 |
| 7829 | M427T20_ | 1.472848 | 0.558609 | 0.431853 | 0.677438 | 0.553998 | UP   | 427.1241 | 427.1236 |
| 7830 | M357T29  | 1.384401 | -0.46926 | -0.43953 | 0.677465 | 0.554006 | DOWN | 357.2612 | 357.2605 |
| 7831 | M425T10_ | 1.643849 | 0.717078 | 0.433919 | 0.677644 | 0.554058 | UP   | 425.2745 | 425.2737 |
| 7832 | M155T2   | 1.493004 | 0.578218 | 0.444752 | 0.677684 | 0.55407  | UP   | 155.0026 | 155.0024 |
| 7833 | M462T21_ | 1.264585 | 0.338664 | 0.435785 | 0.677688 | 0.554071 | UP   | 462.3581 | 462.3569 |
| 7834 | M466T22  | 1.265418 | -0.33961 | -0.43237 | 0.677952 | 0.554147 | DOWN | 466.3295 | 466.3284 |
| 7835 | M222T26_ | 1.314899 | 0.394952 | 0.432531 | 0.678073 | 0.554182 | UP   | 222.1572 | 222.1567 |
| 7836 | M373T37_ | 1.246196 | -0.31753 | -0.43118 | 0.678076 | 0.554183 | DOWN | 373.2587 | 373.2582 |
| 7837 | M277T9   | 1.393387 | -0.4786  | -0.44177 | 0.678163 | 0.554208 | DOWN | 276.6336 | 276.6331 |
| 7838 | M257T24  | 1.358956 | -0.4425  | -0.43724 | 0.678374 | 0.554269 | DOWN | 257.2669 | 257.2666 |
| 7839 | M519T44_ | 1.088363 | -0.12216 | -0.43202 | 0.678458 | 0.554293 | DOWN | 518.8753 | 518.8751 |
| 7840 | M421T24  | 1.286726 | -0.36371 | -0.43483 | 0.678795 | 0.554391 | DOWN | 421.3426 | 421.3421 |
| 7841 | M399T30_ | 1.482261 | 0.5678   | 0.43306  | 0.678909 | 0.554424 | UP   | 399.2665 | 399.2622 |
| 7842 | M163T29_ | 1.343589 | -0.42609 | -0.43634 | 0.678937 | 0.554432 | DOWN | 163.0754 | 163.0751 |
| 7843 | M511T16  | 1.353378 | 0.436565 | 0.43014  | 0.67902  | 0.554456 | UP   | 511.4222 | 511.4213 |
| 7844 | M515T22_ | 1.275192 | -0.35071 | -0.43567 | 0.679039 | 0.554462 | DOWN | 515.4171 | 515.4163 |
| 7845 | M558T21_ | 1.288344 | 0.365517 | 0.430776 | 0.679046 | 0.554464 | UP   | 558.3853 | 558.3845 |
| 7846 | M496T44  | 1.073762 | 0.102674 | 0.434751 | 0.679198 | 0.554508 | UP   | 496.3601 | 496.3595 |
| 7847 | M434T44_ | 1.046688 | -0.06583 | -0.42873 | 0.679473 | 0.554587 | DOWN | 434.2745 | 434.2741 |
| 7848 | M288T23_ | 1.301899 | 0.380617 | 0.437811 | 0.679495 | 0.554593 | UP   | 287.7542 | 287.7539 |

|      |          |          |          |          |          |          |      |          |          |
|------|----------|----------|----------|----------|----------|----------|------|----------|----------|
| 7849 | M572T30_ | 1.249733 | -0.32162 | -0.43173 | 0.679543 | 0.554607 | DOWN | 572.3618 | 572.3612 |
| 7850 | M489T29  | 1.341345 | -0.42368 | -0.43389 | 0.679608 | 0.554626 | DOWN | 489.3395 | 489.3393 |
| 7851 | M445T16  | 1.213591 | 0.279283 | 0.429228 | 0.679646 | 0.554637 | UP   | 445.2201 | 445.2192 |
| 7852 | M290T20  | 1.194985 | -0.25699 | -0.42852 | 0.679654 | 0.554639 | DOWN | 290.2482 | 290.248  |
| 7853 | M433T17  | 1.272069 | 0.347177 | 0.428952 | 0.67974  | 0.554664 | UP   | 433.2053 | 433.2043 |
| 7854 | M287T10  | 1.540719 | 0.623604 | 0.428301 | 0.679779 | 0.554675 | UP   | 287.0635 | 287.0631 |
| 7855 | M548T29_ | 1.232078 | -0.30109 | -0.43375 | 0.679794 | 0.55468  | DOWN | 548.0444 | 548.0435 |
| 7856 | M654T41_ | 1.386522 | -0.47147 | -0.4283  | 0.679797 | 0.55468  | DOWN | 654.3872 | 654.3827 |
| 7857 | M490T30_ | 1.073169 | 0.101877 | 0.429493 | 0.679801 | 0.554682 | UP   | 490.3649 | 490.3643 |
| 7858 | M335T29_ | 1.264155 | 0.338173 | 0.429254 | 0.679902 | 0.554711 | UP   | 335.2793 | 335.2789 |
| 7859 | M341T10_ | 1.57523  | -0.65556 | -0.43273 | 0.680061 | 0.554756 | DOWN | 340.9546 | 340.9512 |
| 7860 | M667T29  | 1.338163 | -0.42025 | -0.43302 | 0.680087 | 0.554764 | DOWN | 667.2589 | 667.2573 |
| 7861 | M573T18  | 1.489291 | -0.57463 | -0.43373 | 0.680234 | 0.554807 | DOWN | 572.9288 | 572.9283 |
| 7862 | M694T28  | 1.298681 | 0.377047 | 0.431894 | 0.680283 | 0.554821 | UP   | 694.1745 | 694.174  |
| 7863 | M655T41_ | 1.472476 | -0.55824 | -0.42832 | 0.680294 | 0.554824 | DOWN | 654.834  | 654.8328 |
| 7864 | M471T14_ | 1.407115 | 0.49274  | 0.432443 | 0.680326 | 0.554833 | UP   | 471.1791 | 471.1786 |
| 7865 | M334T22  | 1.36719  | 0.451213 | 0.427422 | 0.680348 | 0.554839 | UP   | 334.0988 | 334.0986 |
| 7866 | M359T9_4 | 1.640888 | 0.714477 | 0.427903 | 0.680729 | 0.554949 | UP   | 358.9388 | 358.9387 |
| 7867 | M359T26_ | 1.329042 | -0.41039 | -0.43379 | 0.680737 | 0.554951 | DOWN | 359.2048 | 359.204  |
| 7868 | M387T23_ | 1.25982  | 0.333217 | 0.428029 | 0.680943 | 0.555011 | UP   | 387.1041 | 387.1033 |
| 7869 | M436T25  | 1.223236 | -0.2907  | -0.43025 | 0.68098  | 0.555021 | DOWN | 436.3061 | 436.3046 |
| 7870 | M650T41_ | 1.235165 | -0.3047  | -0.42652 | 0.68136  | 0.555131 | DOWN | 650.4936 | 650.4922 |
| 7871 | M234T10_ | 1.578802 | 0.65883  | 0.425883 | 0.681426 | 0.55515  | UP   | 233.5983 | 233.5978 |
| 7872 | M465T26_ | 1.312375 | -0.39218 | -0.42691 | 0.681934 | 0.555296 | DOWN | 465.381  | 465.3806 |
| 7873 | M237T32  | 1.29562  | 0.373643 | 0.4256   | 0.682244 | 0.555385 | UP   | 237.185  | 237.1848 |
| 7874 | M407T11_ | 1.305787 | 0.38492  | 0.427636 | 0.682252 | 0.555387 | UP   | 407.2962 | 407.2955 |
| 7875 | M281T18_ | 1.302232 | 0.380987 | 0.426358 | 0.682303 | 0.555402 | UP   | 281.0952 | 281.0944 |
| 7876 | M306T23_ | 1.452016 | -0.53806 | -0.42521 | 0.682339 | 0.555412 | DOWN | 306.3051 | 306.3037 |
| 7877 | M422T18  | 1.159203 | -0.21313 | -0.42425 | 0.682741 | 0.555528 | DOWN | 422.2483 | 422.2479 |
| 7878 | M273T33  | 1.232737 | 0.301865 | 0.424055 | 0.682778 | 0.555538 | UP   | 273.2062 | 273.2057 |
| 7879 | M480T32_ | 1.248087 | -0.31972 | -0.43209 | 0.682877 | 0.555566 | DOWN | 480.3395 | 480.3347 |
| 7880 | M391T34_ | 1.266029 | -0.34031 | -0.4255  | 0.68288  | 0.555567 | DOWN | 391.2381 | 391.2378 |
| 7881 | M423T29_ | 1.264399 | 0.338452 | 0.425744 | 0.682883 | 0.555568 | UP   | 423.3318 | 423.3309 |
| 7882 | M443T22  | 1.289857 | 0.367212 | 0.429475 | 0.683351 | 0.555702 | UP   | 443.0415 | 443.0409 |
| 7883 | M404T35  | 1.075593 | -0.10513 | -0.43121 | 0.683733 | 0.555812 | DOWN | 404.2361 | 404.2353 |
| 7884 | M424T19_ | 1.292512 | 0.370178 | 0.422672 | 0.684109 | 0.555919 | UP   | 424.3576 | 424.3573 |
| 7885 | M219T12_ | 1.409046 | 0.494719 | 0.422027 | 0.684126 | 0.555924 | UP   | 219.1746 | 219.1745 |
| 7886 | M825T11  | 1.472713 | 0.558476 | 0.423764 | 0.684139 | 0.555928 | UP   | 825.3531 | 825.3509 |
| 7887 | M293T23  | 1.225498 | 0.293369 | 0.422044 | 0.684195 | 0.555944 | UP   | 293.1387 | 293.1383 |
| 7888 | M742T27  | 1.294324 | 0.372199 | 0.426184 | 0.684402 | 0.556003 | UP   | 742.1747 | 742.1745 |
| 7889 | M826T31  | 1.185652 | 0.245681 | 0.425435 | 0.684504 | 0.556032 | UP   | 825.6117 | 825.6101 |
| 7890 | M523T35_ | 1.285905 | 0.362784 | 0.422853 | 0.684533 | 0.556041 | UP   | 523.3841 | 523.3836 |
| 7891 | M503T20_ | 1.269764 | 0.344561 | 0.421982 | 0.684652 | 0.556075 | UP   | 503.408  | 503.4069 |
| 7892 | M225T32  | 1.089535 | -0.12371 | -0.42127 | 0.684759 | 0.556105 | DOWN | 225.0603 | 225.0602 |
| 7893 | M427T16_ | 1.431339 | 0.517366 | 0.421875 | 0.684876 | 0.556139 | UP   | 427.14   | 427.1399 |
| 7894 | M286T18_ | 1.317176 | 0.397448 | 0.422013 | 0.684945 | 0.556158 | UP   | 286.0741 | 286.0737 |
| 7895 | M392T18_ | 1.552008 | -0.63414 | -0.42944 | 0.685297 | 0.556259 | DOWN | 392.1159 | 392.1157 |



|      |          |          |          |          |          |          |      |          |          |
|------|----------|----------|----------|----------|----------|----------|------|----------|----------|
| 7896 | M306T23_ | 1.241922 | 0.312574 | 0.422631 | 0.685302 | 0.55626  | UP   | 306.2905 | 306.2899 |
| 7897 | M335T16_ | 1.241098 | 0.311616 | 0.421486 | 0.685355 | 0.556276 | UP   | 335.2222 | 335.2216 |
| 7898 | M258T22  | 1.369466 | -0.45361 | -0.4292  | 0.685386 | 0.556284 | DOWN | 258.08   | 258.0794 |
| 7899 | M378T25  | 1.400337 | -0.48577 | -0.4278  | 0.685408 | 0.556291 | DOWN | 378.0974 | 378.0968 |
| 7900 | M726T9   | 1.481571 | 0.567128 | 0.419955 | 0.685575 | 0.556338 | UP   | 725.6144 | 725.6124 |
| 7901 | M552T9   | 1.167504 | -0.22343 | -0.42474 | 0.685636 | 0.556356 | DOWN | 552.2606 | 552.2593 |
| 7902 | M235T26  | 1.228387 | -0.29677 | -0.42167 | 0.685826 | 0.55641  | DOWN | 235.1217 | 235.1213 |
| 7903 | M544T29  | 1.246101 | -0.31742 | -0.42471 | 0.685842 | 0.556415 | DOWN | 544.3398 | 544.3389 |
| 7904 | M359T10_ | 1.523395 | -0.60729 | -0.41933 | 0.686083 | 0.556483 | DOWN | 359.2148 | 359.2138 |
| 7905 | M157T6_1 | 1.341963 | -0.42434 | -0.42189 | 0.686088 | 0.556485 | DOWN | 157.0836 | 157.0833 |
| 7906 | M555T43  | 1.153002 | 0.205395 | 0.41958  | 0.686145 | 0.556501 | UP   | 555.1756 | 555.1744 |
| 7907 | M685T10_ | 1.23874  | 0.308873 | 0.420275 | 0.686318 | 0.55655  | UP   | 684.654  | 684.6517 |
| 7908 | M350T35  | 1.12688  | -0.17233 | -0.42081 | 0.686498 | 0.556602 | DOWN | 350.2408 | 350.2407 |
| 7909 | M320T18_ | 1.423304 | 0.509244 | 0.420099 | 0.686505 | 0.556603 | UP   | 320.0832 | 320.083  |
| 7910 | M286T25_ | 1.370648 | -0.45486 | -0.42326 | 0.686569 | 0.556622 | DOWN | 286.1884 | 286.1881 |
| 7911 | M582T29_ | 1.228152 | -0.29649 | -0.42157 | 0.686592 | 0.556628 | DOWN | 582.2951 | 582.2897 |
| 7912 | M715T26  | 1.37775  | 0.462315 | 0.418771 | 0.686763 | 0.556677 | UP   | 714.5371 | 714.5362 |
| 7913 | M749T11  | 1.346329 | 0.429031 | 0.418194 | 0.686808 | 0.55669  | UP   | 749.4165 | 749.4139 |
| 7914 | M587T21  | 1.44082  | 0.52689  | 0.41961  | 0.686847 | 0.556701 | UP   | 587.3041 | 587.3039 |
| 7915 | M503T12  | 1.368473 | 0.452567 | 0.418126 | 0.686974 | 0.556737 | UP   | 503.1215 | 503.1214 |
| 7916 | M631T11_ | 1.394636 | 0.479889 | 0.420923 | 0.687031 | 0.556753 | UP   | 631.4458 | 631.4446 |
| 7917 | M778T15  | 1.293523 | 0.371305 | 0.420895 | 0.687076 | 0.556766 | UP   | 777.6956 | 777.6954 |
| 7918 | M413T32  | 1.421644 | -0.50756 | -0.42516 | 0.687268 | 0.556821 | DOWN | 413.3164 | 413.3157 |
| 7919 | M384T23_ | 1.26276  | 0.33658  | 0.418685 | 0.687302 | 0.55683  | UP   | 384.2958 | 384.2947 |
| 7920 | M552T21  | 1.379112 | 0.46374  | 0.41782  | 0.687398 | 0.556858 | UP   | 552.0622 | 552.0618 |
| 7921 | M255T9_1 | 1.467353 | 0.553216 | 0.417888 | 0.687499 | 0.556886 | UP   | 254.6366 | 254.6362 |
| 7922 | M366T10_ | 1.462113 | 0.548055 | 0.416515 | 0.688    | 0.557029 | UP   | 365.6831 | 365.6828 |
| 7923 | M283T38  | 1.176687 | 0.234731 | 0.423543 | 0.688213 | 0.557089 | UP   | 283.1356 | 283.1355 |
| 7924 | M318T21  | 1.294765 | 0.37269  | 0.416476 | 0.688288 | 0.557111 | UP   | 318.1085 | 318.1082 |
| 7925 | M401T10_ | 1.221145 | 0.288234 | 0.423632 | 0.688309 | 0.557116 | UP   | 400.8443 | 400.8437 |
| 7926 | M366T20  | 1.316445 | 0.396647 | 0.416137 | 0.688348 | 0.557128 | UP   | 366.1003 | 366.1001 |
| 7927 | M512T29  | 1.274898 | 0.350382 | 0.417683 | 0.688352 | 0.557129 | UP   | 512.3875 | 512.3864 |
| 7928 | M445T22_ | 1.282009 | 0.358407 | 0.420055 | 0.688424 | 0.557149 | UP   | 445.037  | 445.0364 |
| 7929 | M288T11_ | 1.285607 | 0.36245  | 0.415845 | 0.688544 | 0.557183 | UP   | 288.2327 | 288.2324 |
| 7930 | M279T31_ | 1.292797 | 0.370496 | 0.41705  | 0.688581 | 0.557194 | UP   | 279.1436 | 279.1404 |
| 7931 | M250T6   | 1.312431 | -0.39224 | -0.41572 | 0.688582 | 0.557194 | DOWN | 250.1606 | 250.1604 |
| 7932 | M538T43_ | 1.121627 | 0.165592 | 0.415938 | 0.688812 | 0.557259 | UP   | 538.4313 | 538.4305 |
| 7933 | M529T22  | 1.349607 | -0.43254 | -0.42473 | 0.688975 | 0.557305 | DOWN | 529.1431 | 529.142  |
| 7934 | M316T30_ | 1.294912 | -0.37285 | -0.42209 | 0.689195 | 0.557368 | DOWN | 316.2274 | 316.2268 |
| 7935 | M321T23  | 1.27978  | 0.355896 | 0.415964 | 0.689612 | 0.557486 | UP   | 321.2903 | 321.2901 |
| 7936 | M748T43  | 1.090374 | 0.124823 | 0.416294 | 0.689633 | 0.557492 | UP   | 747.5205 | 747.5197 |
| 7937 | M526T24  | 1.290214 | 0.367611 | 0.416025 | 0.689782 | 0.557534 | UP   | 526.4369 | 526.4365 |
| 7938 | M176T17_ | 1.373096 | -0.45743 | -0.42119 | 0.689782 | 0.557534 | DOWN | 175.5562 | 175.556  |
| 7939 | M548T28_ | 1.279624 | 0.35572  | 0.417042 | 0.689805 | 0.557541 | UP   | 548.2435 | 548.2432 |
| 7940 | M236T30_ | 1.278165 | 0.354074 | 0.41351  | 0.690175 | 0.557645 | UP   | 236.1646 | 236.1642 |
| 7941 | M572T33  | 1.28909  | -0.36635 | -0.41716 | 0.690311 | 0.557684 | DOWN | 572.3715 | 572.3703 |
| 7942 | M459T33_ | 1.335649 | -0.41754 | -0.4165  | 0.690362 | 0.557698 | DOWN | 459.3214 | 459.3211 |

|      |           |          |          |          |          |          |      |          |          |
|------|-----------|----------|----------|----------|----------|----------|------|----------|----------|
| 7943 | M810T24   | 1.337051 | -0.41905 | -0.42035 | 0.690363 | 0.557698 | DOWN | 810.3768 | 810.3748 |
| 7944 | M460T20   | 1.348451 | 0.431303 | 0.413353 | 0.690525 | 0.557744 | UP   | 460.0567 | 460.0562 |
| 7945 | M466T11   | 1.22712  | 0.295276 | 0.41211  | 0.691101 | 0.557907 | UP   | 466.3279 | 466.3276 |
| 7946 | M895T34   | 1.312768 | 0.392612 | 0.412325 | 0.691175 | 0.557928 | UP   | 894.6284 | 894.6266 |
| 7947 | M402T24_  | 1.320443 | -0.40102 | -0.4192  | 0.691196 | 0.557934 | DOWN | 402.3368 | 402.3359 |
| 7948 | M228T24   | 1.366039 | 0.449999 | 0.415708 | 0.691251 | 0.55795  | UP   | 228.1034 | 228.1033 |
| 7949 | M913T28   | 1.308186 | 0.387568 | 0.411546 | 0.691542 | 0.558032 | UP   | 913.2911 | 913.2903 |
| 7950 | M354T22   | 1.261076 | 0.334656 | 0.411834 | 0.691573 | 0.55804  | UP   | 354.2854 | 354.2847 |
| 7951 | M319T44   | 1.054105 | -0.07602 | -0.41238 | 0.691589 | 0.558045 | DOWN | 319.1608 | 319.1606 |
| 7952 | M363T9_2  | 1.401097 | 0.486557 | 0.416424 | 0.691608 | 0.55805  | UP   | 363.2377 | 363.2372 |
| 7953 | M599T21_  | 1.335737 | 0.417636 | 0.411457 | 0.691854 | 0.55812  | UP   | 599.1149 | 599.1141 |
| 7954 | M542T29_  | 1.256132 | -0.32899 | -0.41557 | 0.691864 | 0.558122 | DOWN | 541.6659 | 541.6648 |
| 7955 | M718T10   | 1.309244 | 0.388733 | 0.411433 | 0.69195  | 0.558147 | UP   | 718.472  | 718.4705 |
| 7956 | M815T11_  | 1.528859 | -0.61246 | -0.42065 | 0.692369 | 0.558265 | DOWN | 815.3248 | 815.3238 |
| 7957 | M454T9_8  | 1.375406 | 0.459858 | 0.413236 | 0.692534 | 0.558311 | UP   | 454.3696 | 454.3617 |
| 7958 | M315T11_  | 1.280512 | 0.356721 | 0.413833 | 0.692701 | 0.558358 | UP   | 315.2236 | 315.2231 |
| 7959 | M570T7    | 1.584915 | 0.664406 | 0.412062 | 0.692769 | 0.558378 | UP   | 570.3182 | 570.317  |
| 7960 | M482T9_2  | 1.291239 | 0.368756 | 0.409688 | 0.692838 | 0.558397 | UP   | 482.2649 | 482.2641 |
| 7961 | M274T25   | 1.242891 | 0.3137   | 0.412096 | 0.692862 | 0.558404 | UP   | 274.2743 | 274.2736 |
| 7962 | M219T11   | 1.237018 | 0.306866 | 0.415991 | 0.693071 | 0.558462 | UP   | 219.1958 | 219.1953 |
| 7963 | M1142T11_ | 1.49926  | 0.584251 | 0.410714 | 0.693246 | 0.558512 | UP   | 1142.063 | 1142.062 |
| 7964 | M257T37   | 1.296969 | 0.375144 | 0.408814 | 0.693402 | 0.558556 | UP   | 257.2669 | 257.2666 |
| 7965 | M451T9_1  | 1.265058 | 0.339204 | 0.412616 | 0.694068 | 0.558743 | UP   | 450.555  | 450.5532 |
| 7966 | M417T32   | 1.461518 | 0.547467 | 0.411522 | 0.694137 | 0.558762 | UP   | 416.6895 | 416.6894 |
| 7967 | M485T9_4  | 1.397002 | 0.482334 | 0.412111 | 0.694231 | 0.558788 | UP   | 485.3329 | 485.3324 |
| 7968 | M467T29   | 1.258442 | 0.331639 | 0.40941  | 0.694267 | 0.558798 | UP   | 467.3579 | 467.357  |
| 7969 | M451T34   | 1.457952 | 0.543944 | 0.411173 | 0.69428  | 0.558802 | UP   | 451.0503 | 451.0501 |
| 7970 | M343T22_  | 1.234185 | -0.30356 | -0.41427 | 0.694484 | 0.55886  | DOWN | 343.0158 | 343.0144 |
| 7971 | M305T23_  | 1.268028 | 0.342587 | 0.408081 | 0.694496 | 0.558863 | UP   | 305.0502 | 305.0501 |
| 7972 | M346T22_  | 1.276101 | -0.35174 | -0.41183 | 0.694674 | 0.558913 | DOWN | 346.2533 | 346.2525 |
| 7973 | M475T43_  | 1.095336 | 0.131374 | 0.40964  | 0.695009 | 0.559007 | UP   | 475.0065 | 475.0062 |
| 7974 | M298T27_  | 1.300541 | -0.37911 | -0.41286 | 0.695014 | 0.559008 | DOWN | 298.246  | 298.2454 |
| 7975 | M386T38   | 1.300216 | 0.378752 | 0.408628 | 0.695153 | 0.559047 | UP   | 386.2692 | 386.2687 |
| 7976 | M581T21   | 1.33305  | 0.414731 | 0.407016 | 0.695248 | 0.559074 | UP   | 581.1044 | 581.1039 |
| 7977 | M317T23_  | 1.342253 | -0.42466 | -0.41188 | 0.69534  | 0.5591   | DOWN | 316.9755 | 316.9752 |
| 7978 | M424T29   | 1.25948  | 0.332829 | 0.407645 | 0.695426 | 0.559124 | UP   | 424.3351 | 424.3342 |
| 7979 | M378T35_  | 1.110496 | -0.1512  | -0.40842 | 0.695702 | 0.559201 | DOWN | 378.181  | 378.1809 |
| 7980 | M351T15   | 1.406406 | 0.492013 | 0.407079 | 0.695712 | 0.559204 | UP   | 351.0529 | 351.0525 |
| 7981 | M177T29   | 1.180405 | -0.23928 | -0.40723 | 0.696547 | 0.559437 | DOWN | 177.1122 | 177.112  |
| 7982 | M307T23_  | 1.235307 | 0.304869 | 0.406363 | 0.696611 | 0.559455 | UP   | 307.2938 | 307.2933 |
| 7983 | M470T14   | 1.412368 | 0.498116 | 0.40676  | 0.696649 | 0.559466 | UP   | 470.182  | 470.1818 |
| 7984 | M282T23   | 1.203093 | -0.26675 | -0.409   | 0.696818 | 0.559513 | DOWN | 282.1418 | 282.1412 |
| 7985 | M544T27   | 1.223663 | -0.29121 | -0.40536 | 0.69689  | 0.559533 | DOWN | 544.3307 | 544.3301 |
| 7986 | M584T29_  | 1.24898  | -0.32075 | -0.40429 | 0.696909 | 0.559538 | DOWN | 584.3017 | 584.3009 |
| 7987 | M343T17_  | 1.348881 | 0.431763 | 0.404206 | 0.697069 | 0.559583 | UP   | 343.1206 | 343.1205 |
| 7988 | M285T22   | 1.27496  | -0.35045 | -0.4084  | 0.697071 | 0.559584 | DOWN | 285.1855 | 285.1847 |
| 7989 | M707T29   | 1.296894 | 0.375061 | 0.404325 | 0.697114 | 0.559596 | UP   | 706.5229 | 706.5215 |

|      |          |          |          |          |          |          |      |          |          |
|------|----------|----------|----------|----------|----------|----------|------|----------|----------|
| 7990 | M328T32_ | 1.331524 | -0.41308 | -0.41    | 0.697126 | 0.559599 | DOWN | 328.2638 | 328.2634 |
| 7991 | M461T23_ | 1.297569 | 0.375812 | 0.403574 | 0.697226 | 0.559627 | UP   | 461.3499 | 461.3491 |
| 7992 | M310T26_ | 1.322178 | -0.40292 | -0.41169 | 0.697388 | 0.559672 | DOWN | 310.2097 | 310.2092 |
| 7993 | M317T18_ | 1.422303 | -0.50823 | -0.41277 | 0.697407 | 0.559678 | DOWN | 316.9301 | 316.9297 |
| 7994 | M405T22_ | 1.316918 | 0.397165 | 0.40652  | 0.697464 | 0.559693 | UP   | 405.1003 | 405.1001 |
| 7995 | M329T18_ | 1.190506 | 0.251575 | 0.404337 | 0.69749  | 0.559701 | UP   | 328.9999 | 328.9997 |
| 7996 | M511T22_ | 1.391497 | -0.47664 | -0.40957 | 0.697591 | 0.559729 | DOWN | 511.1425 | 511.1417 |
| 7997 | M363T31_ | 1.358843 | 0.442378 | 0.404118 | 0.697885 | 0.559811 | UP   | 363.301  | 363.2978 |
| 7998 | M261T32  | 1.258956 | 0.332228 | 0.402764 | 0.698106 | 0.559873 | UP   | 261.2425 | 261.242  |
| 7999 | M341T35_ | 1.117743 | -0.16059 | -0.40401 | 0.698484 | 0.559978 | DOWN | 341.2882 | 341.2881 |
| 8000 | M309T23_ | 1.346019 | 0.428699 | 0.406329 | 0.698487 | 0.559979 | UP   | 309.1262 | 309.1261 |
| 8001 | M319T11  | 1.441936 | -0.52801 | -0.41278 | 0.698658 | 0.560026 | DOWN | 319.121  | 319.1205 |
| 8002 | M363T30_ | 1.29224  | -0.36987 | -0.40765 | 0.698744 | 0.56005  | DOWN | 363.1082 | 363.105  |
| 8003 | M218T17  | 1.208663 | 0.273412 | 0.403428 | 0.698838 | 0.560076 | UP   | 218.1389 | 218.1387 |
| 8004 | M476T7_2 | 1.468153 | 0.554003 | 0.403707 | 0.69904  | 0.560133 | UP   | 476.3667 | 476.365  |
| 8005 | M547T43  | 1.196513 | 0.258836 | 0.402167 | 0.69912  | 0.560155 | UP   | 547.3463 | 547.3452 |
| 8006 | M385T28_ | 1.329519 | -0.4109  | -0.40396 | 0.699166 | 0.560168 | DOWN | 385.2738 | 385.2734 |
| 8007 | M491T24_ | 1.308363 | -0.38776 | -0.40214 | 0.699374 | 0.560226 | DOWN | 491.3268 | 491.3261 |
| 8008 | M578T30  | 1.055682 | 0.078176 | 0.401898 | 0.699948 | 0.560385 | UP   | 578.4172 | 578.4164 |
| 8009 | M397T28  | 1.22617  | -0.29416 | -0.40288 | 0.699976 | 0.560393 | DOWN | 397.2351 | 397.2343 |
| 8010 | M297T43  | 1.140775 | -0.19001 | -0.39991 | 0.700135 | 0.560437 | DOWN | 297.0824 | 297.082  |
| 8011 | M342T25_ | 1.32722  | -0.40841 | -0.40595 | 0.700161 | 0.560444 | DOWN | 342.2278 | 342.2275 |
| 8012 | M356T19_ | 1.333556 | 0.415279 | 0.399279 | 0.700332 | 0.560492 | UP   | 355.9889 | 355.988  |
| 8013 | M513T32  | 1.273853 | 0.349198 | 0.398999 | 0.700379 | 0.560505 | UP   | 513.3982 | 513.3974 |
| 8014 | M496T27_ | 1.254198 | -0.32676 | -0.40303 | 0.700549 | 0.560552 | DOWN | 496.3304 | 496.3295 |
| 8015 | M313T22_ | 1.171948 | -0.22891 | -0.40384 | 0.700676 | 0.560587 | DOWN | 313.134  | 313.1331 |
| 8016 | M451T23  | 1.280482 | 0.356687 | 0.4038   | 0.700785 | 0.560617 | UP   | 451.1682 | 451.1677 |
| 8017 | M363T11_ | 1.525554 | -0.60933 | -0.40082 | 0.700951 | 0.560664 | DOWN | 363.2467 | 363.2451 |
| 8018 | M257T9_1 | 1.381484 | 0.466218 | 0.398362 | 0.700977 | 0.560671 | UP   | 256.6349 | 256.6347 |
| 8019 | M401T10_ | 1.275681 | 0.351267 | 0.399064 | 0.701134 | 0.560714 | UP   | 400.832  | 400.823  |
| 8020 | M830T11  | 1.40915  | 0.494826 | 0.398766 | 0.701271 | 0.560752 | UP   | 830.3536 | 830.3516 |
| 8021 | M301T21  | 1.188208 | 0.248787 | 0.398415 | 0.70129  | 0.560757 | UP   | 301.2079 | 301.2076 |
| 8022 | M279T18  | 1.293259 | 0.371011 | 0.398139 | 0.701534 | 0.560825 | UP   | 279.0999 | 279.0994 |
| 8023 | M608T9   | 1.2891   | 0.366364 | 0.402568 | 0.701773 | 0.560891 | UP   | 608.3858 | 608.3839 |
| 8024 | M399T11_ | 1.289672 | 0.367005 | 0.400245 | 0.701825 | 0.560906 | UP   | 398.7927 | 398.7921 |
| 8025 | M370T18  | 1.190122 | 0.25111  | 0.39881  | 0.701831 | 0.560907 | UP   | 370.0268 | 370.0257 |
| 8026 | M184T18  | 1.215203 | 0.281198 | 0.398148 | 0.701853 | 0.560913 | UP   | 184.1698 | 184.1693 |
| 8027 | M206T19  | 1.316606 | 0.396824 | 0.397836 | 0.701895 | 0.560925 | UP   | 205.9722 | 205.9721 |
| 8028 | M488T13_ | 1.419605 | 0.50549  | 0.399603 | 0.701905 | 0.560928 | UP   | 488.1734 | 488.1732 |
| 8029 | M256T22  | 1.342252 | -0.42466 | -0.40415 | 0.702119 | 0.560987 | DOWN | 256.0846 | 256.0836 |
| 8030 | M319T21  | 1.302074 | 0.380811 | 0.396361 | 0.702237 | 0.56102  | UP   | 319.1056 | 319.105  |
| 8031 | M233T25  | 1.308936 | -0.38839 | -0.4031  | 0.702796 | 0.561174 | DOWN | 233.2111 | 233.2107 |
| 8032 | M325T17_ | 1.378815 | 0.463429 | 0.406308 | 0.702905 | 0.561204 | UP   | 324.9694 | 324.9688 |
| 8033 | M532T21  | 1.262827 | 0.336657 | 0.396095 | 0.702939 | 0.561214 | UP   | 532.1969 | 532.1968 |
| 8034 | M300T22_ | 1.307905 | -0.38726 | -0.40516 | 0.7032   | 0.561286 | DOWN | 300.1102 | 300.11   |
| 8035 | M1180T11 | 1.417559 | -0.50341 | -0.40045 | 0.703364 | 0.561331 | DOWN | 1179.537 | 1179.53  |
| 8036 | M295T20_ | 1.212623 | 0.278131 | 0.394876 | 0.703385 | 0.561337 | UP   | 295.1543 | 295.1538 |

|      |          |          |          |          |          |          |      |          |          |
|------|----------|----------|----------|----------|----------|----------|------|----------|----------|
| 8037 | M412T21_ | 1.289591 | 0.366914 | 0.395785 | 0.703439 | 0.561352 | UP   | 412.1576 | 412.1562 |
| 8038 | M621T11_ | 1.267756 | 0.342277 | 0.397257 | 0.703565 | 0.561386 | UP   | 621.4598 | 621.4584 |
| 8039 | M541T26  | 1.429715 | 0.515727 | 0.399396 | 0.703856 | 0.561467 | UP   | 541.1744 | 541.1743 |
| 8040 | M222T28_ | 1.303796 | -0.38272 | -0.39351 | 0.704248 | 0.561575 | DOWN | 222.0747 | 222.0745 |
| 8041 | M273T22  | 1.268222 | 0.342808 | 0.394511 | 0.704275 | 0.561582 | UP   | 273.1153 | 273.1152 |
| 8042 | M396T23  | 1.275086 | -0.35059 | -0.39926 | 0.704437 | 0.561627 | DOWN | 396.108  | 396.1072 |
| 8043 | M244T13_ | 1.487354 | -0.57275 | -0.39514 | 0.704438 | 0.561627 | DOWN | 244.2062 | 244.2056 |
| 8044 | M416T32_ | 1.442079 | 0.52815  | 0.397303 | 0.704586 | 0.561668 | UP   | 415.6896 | 415.6891 |
| 8045 | M349T10_ | 1.473608 | 0.559353 | 0.393689 | 0.704642 | 0.561683 | UP   | 348.8819 | 348.8811 |
| 8046 | M583T29_ | 1.430054 | 0.516069 | 0.394976 | 0.704685 | 0.561695 | UP   | 583.2563 | 583.256  |
| 8047 | M384T23_ | 1.253686 | 0.326176 | 0.393379 | 0.704754 | 0.561714 | UP   | 384.1512 | 384.151  |
| 8048 | M422T19_ | 1.261807 | 0.335491 | 0.396492 | 0.704838 | 0.561737 | UP   | 422.3477 | 422.3473 |
| 8049 | M571T11  | 1.530917 | 0.614396 | 0.393539 | 0.704953 | 0.561769 | UP   | 571.2686 | 571.2677 |
| 8050 | M684T10_ | 1.324219 | -0.40514 | -0.39253 | 0.705073 | 0.561802 | DOWN | 683.5251 | 683.5239 |
| 8051 | M180T18  | 1.227582 | 0.29582  | 0.395175 | 0.705206 | 0.561838 | UP   | 179.9937 | 179.9934 |
| 8052 | M839T33  | 1.389083 | 0.474133 | 0.396665 | 0.705235 | 0.561846 | UP   | 838.6246 | 838.6226 |
| 8053 | M223T13  | 1.272701 | 0.347893 | 0.394272 | 0.705465 | 0.56191  | UP   | 223.0054 | 223.0053 |
| 8054 | M356T23  | 1.362261 | -0.446   | -0.39842 | 0.705548 | 0.561932 | DOWN | 356.0066 | 356.0062 |
| 8055 | M597T10  | 1.259849 | -0.33325 | -0.39291 | 0.70566  | 0.561963 | DOWN | 597.3846 | 597.3833 |
| 8056 | M504T11_ | 1.395311 | 0.480587 | 0.392716 | 0.706075 | 0.562077 | UP   | 504.1689 | 504.1671 |
| 8057 | M435T26_ | 1.306994 | 0.386252 | 0.390834 | 0.706481 | 0.562189 | UP   | 435.2489 | 435.2488 |
| 8058 | M415T20_ | 1.204994 | 0.269026 | 0.390703 | 0.706685 | 0.562245 | UP   | 415.2457 | 415.2449 |
| 8059 | M229T14  | 1.200379 | 0.26349  | 0.392206 | 0.706872 | 0.562296 | UP   | 229.1436 | 229.1433 |
| 8060 | M214T22  | 1.206892 | 0.271297 | 0.393325 | 0.706936 | 0.562314 | UP   | 214.2532 | 214.2527 |
| 8061 | M298T25  | 1.303403 | -0.38228 | -0.39479 | 0.707154 | 0.562373 | DOWN | 298.2744 | 298.2739 |
| 8062 | M522T29  | 1.25247  | -0.32478 | -0.39366 | 0.707299 | 0.562413 | DOWN | 522.3464 | 522.3453 |
| 8063 | M729T41  | 1.174026 | -0.23146 | -0.39377 | 0.707406 | 0.562442 | DOWN | 729.4566 | 729.4554 |
| 8064 | M381T26_ | 1.346638 | -0.42936 | -0.39502 | 0.707726 | 0.56253  | DOWN | 381.1474 | 381.1472 |
| 8065 | M759T18_ | 1.393543 | 0.478757 | 0.389229 | 0.707852 | 0.562564 | UP   | 759.053  | 759.0528 |
| 8066 | M315T10_ | 1.442431 | -0.5285  | -0.39214 | 0.708028 | 0.562613 | DOWN | 315.1782 | 315.1772 |
| 8067 | M292T28_ | 1.257294 | 0.330322 | 0.388584 | 0.708056 | 0.56262  | UP   | 292.2566 | 292.256  |
| 8068 | M348T32  | 1.343376 | -0.42586 | -0.39205 | 0.708074 | 0.562625 | DOWN | 348.1215 | 348.1212 |
| 8069 | M265T14  | 1.357815 | 0.441287 | 0.389772 | 0.708088 | 0.562629 | UP   | 265.0838 | 265.0838 |
| 8070 | M453T21_ | 1.283807 | 0.360428 | 0.388752 | 0.708391 | 0.562712 | UP   | 453.1841 | 453.1828 |
| 8071 | M907T10  | 1.35758  | 0.441037 | 0.388053 | 0.708402 | 0.562715 | UP   | 906.682  | 906.6775 |
| 8072 | M398T23_ | 1.436816 | -0.52288 | -0.39496 | 0.708521 | 0.562747 | DOWN | 398.406  | 398.4056 |
| 8073 | M316T27_ | 1.288815 | 0.366046 | 0.387739 | 0.708522 | 0.562748 | UP   | 316.3212 | 316.3208 |
| 8074 | M286T18_ | 1.313403 | -0.39331 | -0.39987 | 0.708603 | 0.56277  | DOWN | 286.0942 | 286.094  |
| 8075 | M752T29_ | 1.264078 | 0.338086 | 0.39075  | 0.70868  | 0.562791 | UP   | 752.2179 | 752.2179 |
| 8076 | M467T27_ | 1.262806 | 0.336633 | 0.389181 | 0.708681 | 0.562791 | UP   | 467.1994 | 467.1992 |
| 8077 | M762T34  | 1.263486 | 0.33741  | 0.388672 | 0.708683 | 0.562792 | UP   | 761.5461 | 761.5442 |
| 8078 | M655T10  | 1.346025 | 0.428705 | 0.388528 | 0.708734 | 0.562806 | UP   | 655.4417 | 655.4396 |
| 8079 | M700T24  | 1.160119 | -0.21427 | -0.38877 | 0.708805 | 0.562825 | DOWN | 700.4276 | 700.4262 |
| 8080 | M1069T29 | 1.308679 | -0.38811 | -0.39145 | 0.708835 | 0.562833 | DOWN | 1069.491 | 1069.489 |
| 8081 | M381T24  | 1.41651  | -0.50234 | -0.39888 | 0.709189 | 0.56293  | DOWN | 381.2022 | 381.2015 |
| 8082 | M506T27  | 1.188595 | -0.24926 | -0.38955 | 0.709326 | 0.562967 | DOWN | 506.3242 | 506.3238 |
| 8083 | M993T11  | 1.430046 | 0.516062 | 0.387423 | 0.709755 | 0.563085 | UP   | 993.4712 | 993.4686 |

|      |          |          |          |          |          |          |      |          |          |
|------|----------|----------|----------|----------|----------|----------|------|----------|----------|
| 8084 | M423T10_ | 1.293287 | 0.371043 | 0.385937 | 0.709784 | 0.563092 | UP   | 423.2462 | 423.2452 |
| 8085 | M440T31_ | 1.354805 | -0.43809 | -0.39151 | 0.709849 | 0.56311  | DOWN | 440.2187 | 440.2182 |
| 8086 | M199T20  | 1.111565 | 0.152592 | 0.388622 | 0.709861 | 0.563114 | UP   | 199.1695 | 199.169  |
| 8087 | M255T10  | 1.318774 | 0.399198 | 0.386022 | 0.709905 | 0.563126 | UP   | 254.6274 | 254.6272 |
| 8088 | M808T34  | 1.347731 | 0.430533 | 0.387728 | 0.710083 | 0.563174 | UP   | 807.5776 | 807.577  |
| 8089 | M332T16_ | 1.131755 | 0.178562 | 0.387222 | 0.710222 | 0.563212 | UP   | 332.1862 | 332.1858 |
| 8090 | M628T35  | 1.245603 | 0.316844 | 0.387408 | 0.710268 | 0.563224 | UP   | 628.4635 | 628.4623 |
| 8091 | M454T24_ | 1.378473 | -0.46307 | -0.39617 | 0.710459 | 0.563276 | DOWN | 454.2914 | 454.2903 |
| 8092 | M429T29_ | 1.387376 | 0.472359 | 0.38968  | 0.710481 | 0.563282 | UP   | 429.0492 | 429.0488 |
| 8093 | M355T22  | 1.254384 | 0.326979 | 0.384717 | 0.710715 | 0.563346 | UP   | 355.2888 | 355.288  |
| 8094 | M717T35  | 1.249639 | 0.321511 | 0.386268 | 0.710787 | 0.563366 | UP   | 716.5161 | 716.5147 |
| 8095 | M713T20  | 1.408609 | 0.494271 | 0.387781 | 0.710814 | 0.563373 | UP   | 712.901  | 712.9008 |
| 8096 | M673T28  | 1.245077 | 0.316235 | 0.384735 | 0.710868 | 0.563388 | UP   | 673.2482 | 673.2475 |
| 8097 | M639T41  | 1.209319 | -0.2742  | -0.38415 | 0.710877 | 0.56339  | DOWN | 639.3123 | 639.3111 |
| 8098 | M488T27  | 1.334729 | 0.416546 | 0.384318 | 0.710879 | 0.563391 | UP   | 488.1555 | 488.155  |
| 8099 | M360T22_ | 1.25547  | -0.32823 | -0.38534 | 0.71116  | 0.563467 | DOWN | 360.3306 | 360.3303 |
| 8100 | M543T27_ | 1.26799  | 0.342544 | 0.38466  | 0.711395 | 0.563531 | UP   | 543.3936 | 543.3933 |
| 8101 | M233T17  | 1.15236  | 0.204591 | 0.383274 | 0.711503 | 0.563561 | UP   | 233.1749 | 233.1744 |
| 8102 | M224T23  | 1.226931 | 0.295054 | 0.385128 | 0.711753 | 0.563629 | UP   | 224.2122 | 224.2117 |
| 8103 | M581T26  | 1.42329  | 0.50923  | 0.388583 | 0.711888 | 0.563665 | UP   | 581.1979 | 581.1967 |
| 8104 | M752T41  | 1.20848  | -0.27319 | -0.38626 | 0.711969 | 0.563687 | DOWN | 752.442  | 752.4409 |
| 8105 | M161T33_ | 1.228792 | 0.297241 | 0.383305 | 0.712004 | 0.563697 | UP   | 161.0808 | 161.0805 |
| 8106 | M424T10_ | 1.308323 | 0.387719 | 0.382567 | 0.712152 | 0.563737 | UP   | 424.3453 | 424.3444 |
| 8107 | M187T36  | 1.050469 | -0.07103 | -0.38412 | 0.712177 | 0.563744 | DOWN | 187.1117 | 187.1117 |
| 8108 | M644T28  | 1.217963 | 0.284471 | 0.382871 | 0.712319 | 0.563782 | UP   | 644.2657 | 644.2649 |
| 8109 | M366T16  | 1.309095 | 0.38857  | 0.38185  | 0.712678 | 0.56388  | UP   | 366.1478 | 366.1477 |
| 8110 | M241T33  | 1.158954 | -0.21282 | -0.38178 | 0.713012 | 0.56397  | DOWN | 241.272  | 241.2718 |
| 8111 | M576T25_ | 1.274423 | 0.349844 | 0.384621 | 0.71315  | 0.564008 | UP   | 576.39   | 576.3885 |
| 8112 | M245T9   | 1.36591  | 0.449862 | 0.381037 | 0.713269 | 0.56404  | UP   | 245.1301 | 245.1292 |
| 8113 | M381T26_ | 1.25166  | 0.323843 | 0.382286 | 0.71337  | 0.564067 | UP   | 381.2985 | 381.2978 |
| 8114 | M518T37  | 1.100157 | 0.13771  | 0.381341 | 0.713733 | 0.564166 | UP   | 518.3194 | 518.3184 |
| 8115 | M595T23  | 1.452209 | -0.53825 | -0.38848 | 0.713751 | 0.564171 | DOWN | 595.3752 | 595.3743 |
| 8116 | M311T11  | 1.19736  | 0.259857 | 0.380262 | 0.713799 | 0.564184 | UP   | 311.0906 | 311.0904 |
| 8117 | M672T35  | 1.243983 | 0.314967 | 0.381881 | 0.714009 | 0.56424  | UP   | 672.4897 | 672.4885 |
| 8118 | M276T18  | 1.390879 | 0.475997 | 0.384166 | 0.714037 | 0.564248 | UP   | 276.1023 | 276.1014 |
| 8119 | M298T22_ | 1.309291 | -0.38879 | -0.38728 | 0.714226 | 0.564299 | DOWN | 298.1146 | 298.1142 |
| 8120 | M526T32_ | 1.267468 | -0.34195 | -0.38353 | 0.714323 | 0.564325 | DOWN | 525.8377 | 525.8368 |
| 8121 | M463T21_ | 1.242435 | 0.31317  | 0.382522 | 0.714557 | 0.564389 | UP   | 463.3614 | 463.3602 |
| 8122 | M228T9_2 | 1.147663 | -0.1987  | -0.38042 | 0.714732 | 0.564436 | DOWN | 228.1594 | 228.1589 |
| 8123 | M283T16_ | 1.263095 | 0.336963 | 0.379471 | 0.71476  | 0.564443 | UP   | 283.0955 | 283.0951 |
| 8124 | M568T29_ | 1.272033 | 0.347136 | 0.382003 | 0.714862 | 0.564471 | UP   | 568.3166 | 568.3097 |
| 8125 | M434T17  | 1.127783 | -0.17349 | -0.37893 | 0.715102 | 0.564536 | DOWN | 434.2087 | 434.2084 |
| 8126 | M314T38  | 1.061265 | 0.085784 | 0.378118 | 0.71529  | 0.564586 | UP   | 314.3417 | 314.3413 |
| 8127 | M371T10_ | 1.258192 | 0.331352 | 0.383926 | 0.715363 | 0.564606 | UP   | 371.2165 | 371.2156 |
| 8128 | M383T37  | 1.26569  | 0.339924 | 0.379895 | 0.715378 | 0.56461  | UP   | 383.3712 | 383.371  |
| 8129 | M381T21_ | 1.294906 | 0.372847 | 0.377399 | 0.715695 | 0.564696 | UP   | 381.2515 | 381.2508 |
| 8130 | M373T42  | 1.032566 | -0.04623 | -0.37818 | 0.715701 | 0.564698 | DOWN | 373.2376 | 373.2367 |

|      |          |          |          |          |          |          |      |          |          |
|------|----------|----------|----------|----------|----------|----------|------|----------|----------|
| 8131 | M360T21  | 1.336913 | 0.418906 | 0.37751  | 0.715715 | 0.564701 | UP   | 360.132  | 360.1311 |
| 8132 | M483T18_ | 1.229393 | 0.297946 | 0.378001 | 0.715785 | 0.56472  | UP   | 483.3909 | 483.3898 |
| 8133 | M442T11_ | 1.338698 | 0.420831 | 0.378395 | 0.715917 | 0.564756 | UP   | 442.3437 | 442.3424 |
| 8134 | M702T22  | 1.390134 | -0.47522 | -0.38325 | 0.71693  | 0.565029 | DOWN | 702.1785 | 702.1779 |
| 8135 | M264T20  | 1.279441 | 0.355513 | 0.378669 | 0.716967 | 0.565039 | UP   | 264.1047 | 264.1046 |
| 8136 | M498T31_ | 1.193108 | 0.254725 | 0.375575 | 0.71703  | 0.565055 | UP   | 498.3786 | 498.3784 |
| 8137 | M299T18_ | 1.383556 | 0.468381 | 0.378883 | 0.717157 | 0.56509  | UP   | 299.1183 | 299.1175 |
| 8138 | M294T22_ | 1.295227 | 0.373205 | 0.376078 | 0.717347 | 0.565141 | UP   | 293.6452 | 293.6449 |
| 8139 | M321T21  | 1.303776 | 0.382696 | 0.375055 | 0.717393 | 0.565153 | UP   | 321.101  | 321.1009 |
| 8140 | M336T9   | 1.208912 | -0.27371 | -0.3748  | 0.717582 | 0.565204 | DOWN | 336.2285 | 336.2275 |
| 8141 | M830T43  | 1.106836 | 0.146441 | 0.375029 | 0.71769  | 0.565233 | UP   | 829.6103 | 829.6101 |
| 8142 | M299T31  | 1.389932 | 0.475015 | 0.380665 | 0.717812 | 0.565266 | UP   | 299.3501 | 299.3498 |
| 8143 | M269T31_ | 1.153534 | -0.20606 | -0.37889 | 0.717864 | 0.56528  | DOWN | 269.2477 | 269.2475 |
| 8144 | M724T31_ | 1.303322 | 0.382193 | 0.37658  | 0.718193 | 0.565368 | UP   | 723.5886 | 723.5875 |
| 8145 | M328T27_ | 1.23109  | -0.29994 | -0.37884 | 0.718211 | 0.565373 | DOWN | 328.0817 | 328.0813 |
| 8146 | M435T9_3 | 1.222833 | -0.29023 | -0.37398 | 0.718331 | 0.565405 | DOWN | 435.3336 | 435.3324 |
| 8147 | M678T18  | 1.321223 | 0.401874 | 0.374439 | 0.718555 | 0.565466 | UP   | 677.9467 | 677.9453 |
| 8148 | M572T29_ | 1.293801 | 0.371616 | 0.373562 | 0.718719 | 0.56551  | UP   | 571.8011 | 571.8002 |
| 8149 | M356T22_ | 1.213019 | 0.278602 | 0.376629 | 0.718722 | 0.56551  | UP   | 356.2928 | 356.2922 |
| 8150 | M528T27  | 1.297069 | -0.37526 | -0.37859 | 0.719002 | 0.565585 | DOWN | 528.1565 | 528.1561 |
| 8151 | M398T27_ | 1.258721 | -0.33196 | -0.37818 | 0.719073 | 0.565604 | DOWN | 398.3055 | 398.305  |
| 8152 | M525T32_ | 1.28688  | -0.36388 | -0.37723 | 0.71913  | 0.56562  | DOWN | 525.3638 | 525.3632 |
| 8153 | M540T26_ | 1.408485 | 0.494144 | 0.377313 | 0.719594 | 0.565744 | UP   | 540.1713 | 540.171  |
| 8154 | M275T19  | 1.276866 | 0.352607 | 0.371975 | 0.719623 | 0.565752 | UP   | 275.2566 | 275.2564 |
| 8155 | M587T29_ | 1.354386 | 0.437639 | 0.372394 | 0.719688 | 0.565769 | UP   | 586.7613 | 586.7608 |
| 8156 | M200T33_ | 1.195358 | 0.257442 | 0.372348 | 0.7197   | 0.565772 | UP   | 200.1726 | 200.1723 |
| 8157 | M377T25  | 1.314642 | -0.39467 | -0.37808 | 0.719913 | 0.565829 | DOWN | 377.196  | 377.1955 |
| 8158 | M502T20_ | 1.234151 | 0.303519 | 0.372403 | 0.719958 | 0.565841 | UP   | 502.4046 | 502.4034 |
| 8159 | M753T35  | 1.238232 | 0.308282 | 0.378538 | 0.720078 | 0.565874 | UP   | 752.6237 | 752.6225 |
| 8160 | M333T33  | 1.123583 | 0.168106 | 0.371156 | 0.72026  | 0.565922 | UP   | 333.3347 | 333.3341 |
| 8161 | M632T10_ | 1.431457 | 0.517484 | 0.371995 | 0.72033  | 0.565941 | UP   | 632.1721 | 632.1717 |
| 8162 | M482T24_ | 1.299371 | 0.377813 | 0.372807 | 0.720384 | 0.565956 | UP   | 482.0562 | 482.0558 |
| 8163 | M641T17_ | 1.192507 | 0.253998 | 0.370996 | 0.720411 | 0.565963 | UP   | 641.4619 | 641.4603 |
| 8164 | M288T22_ | 1.226336 | 0.294354 | 0.371704 | 0.720454 | 0.565974 | UP   | 288.29   | 288.2894 |
| 8165 | M382T10_ | 1.325782 | 0.406844 | 0.374198 | 0.720849 | 0.56608  | UP   | 382.3433 | 382.342  |
| 8166 | M554T20  | 1.426711 | 0.512693 | 0.375116 | 0.721037 | 0.56613  | UP   | 554.3128 | 554.3122 |
| 8167 | M247T16  | 1.324784 | -0.40576 | -0.37161 | 0.721056 | 0.566135 | DOWN | 247.1782 | 247.178  |
| 8168 | M379T29_ | 1.224044 | 0.291656 | 0.371477 | 0.721217 | 0.566178 | UP   | 379.3055 | 379.305  |
| 8169 | M427T17  | 1.249771 | -0.32166 | -0.37408 | 0.721909 | 0.566363 | DOWN | 427.1866 | 427.1855 |
| 8170 | M295T9_3 | 1.290663 | 0.368112 | 0.3728   | 0.721909 | 0.566363 | UP   | 295.1955 | 295.195  |
| 8171 | M753T11_ | 1.408643 | 0.494306 | 0.370986 | 0.72206  | 0.566403 | UP   | 753.3903 | 753.389  |
| 8172 | M564T9_2 | 1.285493 | -0.36232 | -0.36919 | 0.722392 | 0.566492 | DOWN | 564.3591 | 564.3579 |
| 8173 | M401T10_ | 1.273592 | 0.348903 | 0.367676 | 0.722698 | 0.566573 | UP   | 401.1147 | 401.1058 |
| 8174 | M554T19  | 1.346104 | 0.42879  | 0.368787 | 0.723042 | 0.566665 | UP   | 554.0063 | 554.0058 |
| 8175 | M299T18_ | 1.196255 | -0.25853 | -0.37126 | 0.723075 | 0.566674 | DOWN | 299.183  | 299.1823 |
| 8176 | M493T11  | 1.167188 | 0.223037 | 0.366869 | 0.723232 | 0.566715 | UP   | 493.1753 | 493.1741 |
| 8177 | M571T29_ | 1.276669 | 0.352384 | 0.369242 | 0.723323 | 0.56674  | UP   | 571.349  | 571.3476 |

|      |          |          |          |          |          |          |      |          |          |
|------|----------|----------|----------|----------|----------|----------|------|----------|----------|
| 8178 | M299T30_ | 1.296326 | -0.37443 | -0.36692 | 0.723358 | 0.566749 | DOWN | 299.201  | 299.2006 |
| 8179 | M591T11_ | 1.390391 | 0.475491 | 0.366687 | 0.723429 | 0.566768 | UP   | 590.8067 | 590.7978 |
| 8180 | M299T22_ | 1.299866 | -0.37836 | -0.37392 | 0.723457 | 0.566775 | DOWN | 299.1066 | 299.1059 |
| 8181 | M752T11_ | 1.403053 | 0.488569 | 0.369538 | 0.723465 | 0.566777 | UP   | 752.3878 | 752.3863 |
| 8182 | M369T34  | 1.303906 | -0.38284 | -0.37668 | 0.723582 | 0.566808 | DOWN | 369.1252 | 369.1248 |
| 8183 | M365T40_ | 1.213731 | 0.279449 | 0.366361 | 0.723621 | 0.566819 | UP   | 365.3892 | 365.3887 |
| 8184 | M718T35  | 1.243519 | 0.314429 | 0.368152 | 0.723716 | 0.566844 | UP   | 717.5195 | 717.5181 |
| 8185 | M456T9_3 | 1.21088  | -0.27606 | -0.36611 | 0.723822 | 0.566872 | DOWN | 456.3526 | 456.3506 |
| 8186 | M361T28_ | 1.295348 | -0.37334 | -0.3685  | 0.724069 | 0.566938 | DOWN | 361.2739 | 361.2734 |
| 8187 | M316T27_ | 1.266506 | -0.34085 | -0.36994 | 0.724233 | 0.566981 | DOWN | 316.1991 | 316.1986 |
| 8188 | M701T10_ | 1.317581 | 0.397891 | 0.366165 | 0.72424  | 0.566983 | UP   | 701.4941 | 701.4925 |
| 8189 | M548T33_ | 1.236772 | -0.30658 | -0.36924 | 0.724733 | 0.567114 | DOWN | 548.3712 | 548.3703 |
| 8190 | M312T24  | 1.219142 | 0.285866 | 0.366444 | 0.724913 | 0.567162 | UP   | 311.7179 | 311.7175 |
| 8191 | M419T25  | 1.275381 | -0.35093 | -0.37079 | 0.724925 | 0.567165 | DOWN | 419.2793 | 419.2785 |
| 8192 | M548T28_ | 1.241316 | 0.311871 | 0.366671 | 0.725429 | 0.567299 | UP   | 548.2438 | 548.2429 |
| 8193 | M417T21_ | 1.272075 | 0.347184 | 0.364496 | 0.725515 | 0.567321 | UP   | 417.1365 | 417.1351 |
| 8194 | M619T11  | 1.367447 | 0.451485 | 0.368338 | 0.725523 | 0.567324 | UP   | 619.2586 | 619.2576 |
| 8195 | M165T26_ | 1.218392 | 0.284978 | 0.364591 | 0.725665 | 0.567361 | UP   | 165.0911 | 165.0908 |
| 8196 | M601T18_ | 1.25557  | 0.328342 | 0.368207 | 0.725736 | 0.56738  | UP   | 601.0369 | 601.0367 |
| 8197 | M496T30_ | 1.145701 | -0.19623 | -0.36336 | 0.725761 | 0.567387 | DOWN | 496.3398 | 496.3389 |
| 8198 | M327T20_ | 1.162844 | -0.21766 | -0.36717 | 0.725772 | 0.56739  | DOWN | 327.0085 | 327.0078 |
| 8199 | M202T9_2 | 1.286017 | -0.36291 | -0.36349 | 0.725854 | 0.567411 | DOWN | 202.1801 | 202.18   |
| 8200 | M347T21_ | 1.58793  | 0.667147 | 0.364752 | 0.726034 | 0.567459 | UP   | 347.2166 | 347.2117 |
| 8201 | M375T17  | 1.233504 | 0.302762 | 0.363824 | 0.726134 | 0.567485 | UP   | 375.2103 | 375.2091 |
| 8202 | M568T31_ | 1.177513 | 0.235743 | 0.364183 | 0.726203 | 0.567504 | UP   | 567.9098 | 567.9097 |
| 8203 | M643T29_ | 1.256607 | 0.329533 | 0.363185 | 0.726241 | 0.567514 | UP   | 643.4632 | 643.4624 |
| 8204 | M454T14  | 1.330157 | 0.411597 | 0.366931 | 0.726253 | 0.567517 | UP   | 454.0223 | 454.0219 |
| 8205 | M418T44_ | 1.068404 | 0.095457 | 0.365145 | 0.726298 | 0.567529 | UP   | 418.243  | 418.2428 |
| 8206 | M291T33_ | 1.217312 | 0.283699 | 0.366135 | 0.726745 | 0.567647 | UP   | 291.2359 | 291.2357 |
| 8207 | M360T9_3 | 1.369227 | -0.45336 | -0.36596 | 0.726785 | 0.567658 | DOWN | 360.2561 | 360.2548 |
| 8208 | M415T24_ | 1.207155 | -0.27161 | -0.36723 | 0.72682  | 0.567667 | DOWN | 415.2116 | 415.2109 |
| 8209 | M396T25  | 1.392293 | -0.47746 | -0.36646 | 0.727019 | 0.56772  | DOWN | 396.2505 | 396.2499 |
| 8210 | M464T21  | 1.246508 | 0.317892 | 0.363443 | 0.727042 | 0.567725 | UP   | 464.3648 | 464.3633 |
| 8211 | M213T22_ | 1.213944 | 0.279702 | 0.36442  | 0.727117 | 0.567745 | UP   | 213.0576 | 213.057  |
| 8212 | M380T37  | 1.229927 | -0.29857 | -0.36835 | 0.727274 | 0.567787 | DOWN | 380.1983 | 380.1981 |
| 8213 | M300T35  | 1.161498 | 0.215987 | 0.361469 | 0.727293 | 0.567792 | UP   | 300.2899 | 300.2895 |
| 8214 | M254T9_1 | 1.361723 | 0.445433 | 0.361892 | 0.727529 | 0.567854 | UP   | 253.6367 | 253.6306 |
| 8215 | M380T23_ | 1.138072 | -0.18659 | -0.36087 | 0.727579 | 0.567867 | DOWN | 380.2434 | 380.2433 |
| 8216 | M500T14_ | 1.331836 | 0.413417 | 0.362599 | 0.727593 | 0.567871 | UP   | 500.0486 | 500.0484 |
| 8217 | M198T13  | 1.29304  | 0.370767 | 0.362028 | 0.727699 | 0.567899 | UP   | 198.1853 | 198.1851 |
| 8218 | M1068T29 | 1.237997 | -0.30801 | -0.36544 | 0.72795  | 0.567965 | DOWN | 1068.487 | 1068.485 |
| 8219 | M389T21  | 1.28138  | 0.357699 | 0.360631 | 0.727969 | 0.56797  | UP   | 389.1416 | 389.1404 |
| 8220 | M256T9_1 | 1.401888 | 0.487371 | 0.3612   | 0.72804  | 0.567989 | UP   | 255.6369 | 255.6363 |
| 8221 | M655T41_ | 1.296554 | -0.37468 | -0.36022 | 0.728158 | 0.56802  | DOWN | 655.3053 | 655.2959 |
| 8222 | M299T21_ | 1.198495 | 0.261223 | 0.361503 | 0.728199 | 0.568031 | UP   | 299.201  | 299.2    |
| 8223 | M468T29  | 1.232555 | 0.301652 | 0.360819 | 0.728691 | 0.568161 | UP   | 468.3613 | 468.3605 |
| 8224 | M574T30_ | 1.260322 | -0.33379 | -0.36142 | 0.728736 | 0.568173 | DOWN | 573.53   | 573.5292 |

|      |          |          |          |          |          |          |      |          |          |
|------|----------|----------|----------|----------|----------|----------|------|----------|----------|
| 8225 | M278T12  | 1.230369 | 0.299091 | 0.359495 | 0.728777 | 0.568183 | UP   | 278.1907 | 278.19   |
| 8226 | M410T28_ | 1.242675 | -0.31345 | -0.36176 | 0.72881  | 0.568192 | DOWN | 410.1236 | 410.1228 |
| 8227 | M453T9_8 | 1.342056 | 0.424444 | 0.364678 | 0.728886 | 0.568212 | UP   | 453.3697 | 453.3658 |
| 8228 | M317T31  | 1.171809 | -0.22874 | -0.36019 | 0.728939 | 0.568226 | DOWN | 317.1151 | 317.1145 |
| 8229 | M349T20  | 1.285094 | 0.361874 | 0.360337 | 0.729151 | 0.568282 | UP   | 349.1212 | 349.1207 |
| 8230 | M422T40  | 1.110038 | -0.15061 | -0.36034 | 0.729153 | 0.568282 | DOWN | 422.2902 | 422.29   |
| 8231 | M524T32  | 1.251883 | -0.3241  | -0.36087 | 0.729417 | 0.568352 | DOWN | 524.3617 | 524.3607 |
| 8232 | M621T32  | 1.290757 | -0.36822 | -0.35872 | 0.729445 | 0.568359 | DOWN | 621.2734 | 621.272  |
| 8233 | M338T24_ | 1.315013 | -0.39508 | -0.36697 | 0.729574 | 0.568393 | DOWN | 338.1078 | 338.1074 |
| 8234 | M396T30  | 1.201929 | 0.265351 | 0.358374 | 0.729722 | 0.568432 | UP   | 396.3262 | 396.3259 |
| 8235 | M229T29  | 1.210801 | 0.275962 | 0.35931  | 0.729872 | 0.568472 | UP   | 229.2163 | 229.2159 |
| 8236 | M278T32  | 1.242164 | 0.312856 | 0.357451 | 0.730015 | 0.568509 | UP   | 278.2691 | 278.2686 |
| 8237 | M541T7   | 1.432542 | 0.518577 | 0.357686 | 0.730045 | 0.568517 | UP   | 541.2619 | 541.2613 |
| 8238 | M357T19_ | 1.201887 | 0.265301 | 0.357353 | 0.730097 | 0.568531 | UP   | 357.2904 | 357.2899 |
| 8239 | M476T20_ | 1.220605 | 0.287596 | 0.357359 | 0.730138 | 0.568541 | UP   | 476.2548 | 476.2546 |
| 8240 | M701T22  | 1.37765  | -0.46221 | -0.36449 | 0.730303 | 0.568585 | DOWN | 701.1752 | 701.1748 |
| 8241 | M749T32  | 1.240609 | 0.311048 | 0.358789 | 0.73036  | 0.5686   | UP   | 748.5335 | 748.5319 |
| 8242 | M573T44  | 1.07869  | 0.109281 | 0.359308 | 0.730468 | 0.568628 | UP   | 573.4164 | 573.4159 |
| 8243 | M827T11  | 1.399581 | 0.484995 | 0.356922 | 0.730706 | 0.568691 | UP   | 827.3582 | 827.3525 |
| 8244 | M543T31  | 1.2727   | -0.34789 | -0.36291 | 0.730761 | 0.568705 | DOWN | 542.6676 | 542.6668 |
| 8245 | M396T32_ | 1.299874 | -0.37837 | -0.3617  | 0.730872 | 0.568734 | DOWN | 396.2899 | 396.2892 |
| 8246 | M357T17  | 1.250711 | 0.322749 | 0.356562 | 0.73094  | 0.568752 | UP   | 357.0099 | 357.0095 |
| 8247 | M826T11_ | 1.393783 | 0.479006 | 0.357233 | 0.731261 | 0.568836 | UP   | 826.3566 | 826.3533 |
| 8248 | M291T19  | 1.196423 | -0.25873 | -0.35708 | 0.731267 | 0.568838 | DOWN | 291.2533 | 291.2528 |
| 8249 | M241T20  | 1.225818 | -0.29375 | -0.36043 | 0.731285 | 0.568842 | DOWN | 241.0557 | 241.0552 |
| 8250 | M425T40  | 1.129829 | -0.1761  | -0.35671 | 0.731344 | 0.568858 | DOWN | 425.2874 | 425.2865 |
| 8251 | M460T23_ | 1.381857 | 0.466608 | 0.359325 | 0.731523 | 0.568905 | UP   | 460.342  | 460.3415 |
| 8252 | M611T11_ | 1.332716 | -0.41437 | -0.35657 | 0.731609 | 0.568927 | DOWN | 611.4068 | 611.4057 |
| 8253 | M293T9_2 | 1.448327 | 0.534388 | 0.355737 | 0.731781 | 0.568972 | UP   | 293.0145 | 293.0139 |
| 8254 | M399T21  | 1.275567 | 0.351139 | 0.354987 | 0.732082 | 0.569051 | UP   | 399.1259 | 399.1249 |
| 8255 | M157T6_2 | 1.278438 | 0.354382 | 0.356691 | 0.732411 | 0.569137 | UP   | 157.0834 | 157.0833 |
| 8256 | M379T23  | 1.195323 | 0.2574   | 0.354185 | 0.732472 | 0.569153 | UP   | 379.296  | 379.2955 |
| 8257 | M463T11  | 1.358186 | 0.441681 | 0.354834 | 0.73269  | 0.56921  | UP   | 463.1422 | 463.1406 |
| 8258 | M246T9_1 | 1.213321 | -0.27896 | -0.35546 | 0.732924 | 0.569272 | DOWN | 246.1304 | 246.1299 |
| 8259 | M285T16_ | 1.266533 | 0.340885 | 0.35361  | 0.733012 | 0.569295 | UP   | 285.091  | 285.0904 |
| 8260 | M473T9_2 | 1.243752 | -0.3147  | -0.3547  | 0.733119 | 0.569323 | DOWN | 472.9286 | 472.9276 |
| 8261 | M377T18  | 1.149631 | 0.201171 | 0.357811 | 0.733135 | 0.569327 | UP   | 377.2499 | 377.2494 |
| 8262 | M312T17_ | 1.220397 | 0.28735  | 0.354274 | 0.733145 | 0.569329 | UP   | 312.1809 | 312.1804 |
| 8263 | M642T31  | 1.233382 | -0.30262 | -0.35702 | 0.733341 | 0.56938  | DOWN | 641.5217 | 641.5214 |
| 8264 | M530T32_ | 1.305957 | -0.38511 | -0.35613 | 0.733768 | 0.569492 | DOWN | 530.3244 | 530.3236 |
| 8265 | M501T18  | 1.229484 | 0.298053 | 0.353366 | 0.733838 | 0.56951  | UP   | 501.1115 | 501.1099 |
| 8266 | M297T22_ | 1.273335 | 0.348612 | 0.353507 | 0.733948 | 0.569539 | UP   | 296.5879 | 296.5877 |
| 8267 | M484T18_ | 1.316662 | 0.396885 | 0.352731 | 0.733955 | 0.569541 | UP   | 484.1087 | 484.1073 |
| 8268 | M408T11_ | 1.229568 | 0.298151 | 0.354776 | 0.733971 | 0.569545 | UP   | 407.798  | 407.7978 |
| 8269 | M331T20_ | 1.150947 | -0.20282 | -0.35229 | 0.73503  | 0.569821 | DOWN | 331.0025 | 331.0023 |
| 8270 | M394T16  | 1.280566 | -0.35678 | -0.35281 | 0.735089 | 0.569837 | DOWN | 393.993  | 393.9926 |
| 8271 | M594T34  | 1.212696 | -0.27822 | -0.3532  | 0.735209 | 0.569868 | DOWN | 594.3763 | 594.3755 |



|      |          |          |          |          |          |          |      |          |          |
|------|----------|----------|----------|----------|----------|----------|------|----------|----------|
| 8272 | M367T10_ | 1.325616 | 0.406663 | 0.350621 | 0.735213 | 0.569869 | UP   | 366.8413 | 366.8409 |
| 8273 | M265T15_ | 1.220371 | 0.28732  | 0.352411 | 0.73535  | 0.569904 | UP   | 265.1913 | 265.191  |
| 8274 | M384T10_ | 1.331843 | 0.413424 | 0.351737 | 0.735413 | 0.569921 | UP   | 384.314  | 384.3127 |
| 8275 | M347T22  | 1.235424 | -0.30501 | -0.35353 | 0.735533 | 0.569952 | DOWN | 347.2566 | 347.2559 |
| 8276 | M510T20  | 1.183265 | -0.24277 | -0.35301 | 0.735648 | 0.569982 | DOWN | 510.3193 | 510.3182 |
| 8277 | M350T43  | 1.051242 | -0.0721  | -0.3496  | 0.735666 | 0.569987 | DOWN | 350.2173 | 350.2167 |
| 8278 | M399T27_ | 1.20961  | 0.274542 | 0.35091  | 0.735725 | 0.570002 | UP   | 399.3583 | 399.3576 |
| 8279 | M314T26_ | 1.221154 | 0.288245 | 0.352368 | 0.735765 | 0.570012 | UP   | 314.1054 | 314.1051 |
| 8280 | M332T28  | 1.344715 | -0.4273  | -0.35501 | 0.736321 | 0.570157 | DOWN | 332.3161 | 332.3156 |
| 8281 | M525T18  | 1.317083 | 0.397346 | 0.34941  | 0.736444 | 0.570189 | UP   | 525.1355 | 525.1346 |
| 8282 | M431T25_ | 1.222638 | 0.289998 | 0.349489 | 0.736589 | 0.570227 | UP   | 431.3747 | 431.3737 |
| 8283 | M224T16_ | 1.233061 | 0.302244 | 0.349272 | 0.736608 | 0.570232 | UP   | 224.2375 | 224.2373 |
| 8284 | M238T9   | 1.303319 | -0.38219 | -0.35376 | 0.736686 | 0.570252 | DOWN | 238.1602 | 238.16   |
| 8285 | M377T32_ | 1.21874  | 0.285391 | 0.349126 | 0.736719 | 0.57026  | UP   | 377.29   | 377.2896 |
| 8286 | M716T10_ | 1.293742 | 0.371549 | 0.349967 | 0.736833 | 0.57029  | UP   | 715.5106 | 715.5074 |
| 8287 | M440T31_ | 1.387634 | 0.472627 | 0.349447 | 0.737027 | 0.57034  | UP   | 439.717  | 439.717  |
| 8288 | M392T37  | 1.080672 | -0.11193 | -0.35494 | 0.737093 | 0.570358 | DOWN | 392.3159 | 392.3158 |
| 8289 | M341T35_ | 1.212979 | -0.27855 | -0.34968 | 0.737423 | 0.570443 | DOWN | 341.2662 | 341.2658 |
| 8290 | M831T10  | 1.372905 | 0.457232 | 0.348082 | 0.73745  | 0.57045  | UP   | 831.4121 | 831.4089 |
| 8291 | M505T11_ | 1.360391 | 0.444021 | 0.348227 | 0.737831 | 0.570549 | UP   | 505.172  | 505.1704 |
| 8292 | M453T9_7 | 1.23472  | -0.30418 | -0.34741 | 0.737976 | 0.570586 | DOWN | 453.3435 | 453.3416 |
| 8293 | M353T16_ | 1.150778 | 0.202609 | 0.345817 | 0.738416 | 0.5707   | UP   | 353.1456 | 353.1449 |
| 8294 | M310T28_ | 1.198823 | 0.261619 | 0.346952 | 0.738477 | 0.570716 | UP   | 310.2097 | 310.2091 |
| 8295 | M561T34  | 1.178886 | 0.237425 | 0.346108 | 0.738585 | 0.570744 | UP   | 561.369  | 561.3681 |
| 8296 | M375T22  | 1.24129  | 0.31184  | 0.346171 | 0.738594 | 0.570746 | UP   | 375.215  | 375.2145 |
| 8297 | M472T20_ | 1.214716 | 0.280619 | 0.345895 | 0.739052 | 0.570865 | UP   | 472.3748 | 472.3736 |
| 8298 | M376T9_1 | 1.245262 | 0.316449 | 0.34717  | 0.739323 | 0.570935 | UP   | 375.7188 | 375.7176 |
| 8299 | M238T28  | 1.262806 | 0.336633 | 0.344618 | 0.739341 | 0.57094  | UP   | 238.0522 | 238.0521 |
| 8300 | M173T23  | 1.248661 | -0.32038 | -0.34848 | 0.739367 | 0.570946 | DOWN | 173.1729 | 173.1727 |
| 8301 | M402T22_ | 1.237103 | 0.306965 | 0.349511 | 0.739434 | 0.570964 | UP   | 402.015  | 402.0144 |
| 8302 | M555T19  | 1.3026   | 0.381394 | 0.344352 | 0.739596 | 0.571006 | UP   | 555.0036 | 555.0033 |
| 8303 | M315T24_ | 1.207055 | 0.271492 | 0.345971 | 0.739628 | 0.571014 | UP   | 314.9371 | 314.9366 |
| 8304 | M374T22  | 1.257526 | 0.330588 | 0.3457   | 0.73967  | 0.571025 | UP   | 374.0205 | 374.0198 |
| 8305 | M245T13  | 1.242155 | 0.312845 | 0.344268 | 0.739723 | 0.571038 | UP   | 245.1942 | 245.1937 |
| 8306 | M197T20  | 1.164175 | -0.21931 | -0.35065 | 0.73977  | 0.57105  | DOWN | 197.1537 | 197.1536 |
| 8307 | M753T11_ | 1.378248 | 0.462835 | 0.346346 | 0.739951 | 0.571097 | UP   | 752.8893 | 752.8877 |
| 8308 | M259T30_ | 1.256587 | -0.32951 | -0.34966 | 0.739968 | 0.571102 | DOWN | 259.1655 | 259.1654 |
| 8309 | M332T10_ | 1.380825 | -0.46553 | -0.34771 | 0.739987 | 0.571106 | DOWN | 332.213  | 332.2127 |
| 8310 | M598T23  | 1.226573 | 0.294633 | 0.344338 | 0.740008 | 0.571112 | UP   | 598.2079 | 598.2068 |
| 8311 | M488T18  | 1.330328 | 0.411782 | 0.344525 | 0.740019 | 0.571115 | UP   | 488.1044 | 488.1039 |
| 8312 | M360T24  | 1.22195  | -0.28919 | -0.34939 | 0.740169 | 0.571153 | DOWN | 360.2689 | 360.2686 |
| 8313 | M264T9   | 1.380911 | -0.46562 | -0.34459 | 0.740273 | 0.57118  | DOWN | 263.684  | 263.6838 |
| 8314 | M378T10_ | 1.369857 | -0.45403 | -0.35097 | 0.740431 | 0.571221 | DOWN | 378.211  | 378.2103 |
| 8315 | M308T28_ | 1.222166 | 0.28944  | 0.343532 | 0.740482 | 0.571234 | UP   | 308.2798 | 308.2793 |
| 8316 | M166T23_ | 1.229713 | -0.29832 | -0.34717 | 0.74069  | 0.571288 | DOWN | 166.0864 | 166.0861 |
| 8317 | M402T22_ | 1.242839 | 0.313639 | 0.350741 | 0.740796 | 0.571315 | UP   | 402.2069 | 402.2069 |
| 8318 | M367T30_ | 1.195997 | 0.258213 | 0.343316 | 0.740944 | 0.571353 | UP   | 367.3319 | 367.3312 |

|      |          |          |          |          |          |          |      |          |          |
|------|----------|----------|----------|----------|----------|----------|------|----------|----------|
| 8319 | M429T22  | 1.208201 | 0.272861 | 0.347389 | 0.740972 | 0.57136  | UP   | 428.9231 | 428.923  |
| 8320 | M280T25  | 1.147402 | -0.19837 | -0.34288 | 0.741102 | 0.571394 | DOWN | 280.1545 | 280.1541 |
| 8321 | M815T11_ | 1.240402 | 0.310807 | 0.343303 | 0.74136  | 0.57146  | UP   | 814.5899 | 814.5885 |
| 8322 | M648T20  | 1.310343 | 0.389944 | 0.342099 | 0.741365 | 0.571462 | UP   | 648.1769 | 648.1757 |
| 8323 | M300T21  | 1.199329 | 0.262227 | 0.342776 | 0.741401 | 0.571471 | UP   | 300.2044 | 300.2037 |
| 8324 | M268T25_ | 1.191895 | 0.253257 | 0.343832 | 0.741428 | 0.571478 | UP   | 268.2635 | 268.263  |
| 8325 | M415T19_ | 1.187804 | 0.248297 | 0.341578 | 0.741469 | 0.571488 | UP   | 415.2457 | 415.2443 |
| 8326 | M389T23_ | 1.22682  | 0.294924 | 0.342674 | 0.741469 | 0.571489 | UP   | 388.5592 | 388.5588 |
| 8327 | M451T24_ | 1.222331 | 0.289635 | 0.344607 | 0.741573 | 0.571515 | UP   | 451.1886 | 451.1882 |
| 8328 | M305T23_ | 1.283453 | -0.36003 | -0.34797 | 0.741663 | 0.571538 | DOWN | 305.2882 | 305.2877 |
| 8329 | M559T32  | 1.189984 | 0.250942 | 0.341834 | 0.741752 | 0.571561 | UP   | 559.4471 | 559.4466 |
| 8330 | M838T33  | 1.275577 | 0.35115  | 0.342974 | 0.741891 | 0.571597 | UP   | 837.621  | 837.6196 |
| 8331 | M312T19_ | 1.219822 | 0.286671 | 0.342993 | 0.742017 | 0.57163  | UP   | 312.1263 | 312.1258 |
| 8332 | M357T24  | 1.246271 | -0.31762 | -0.34383 | 0.742039 | 0.571635 | DOWN | 357.3114 | 357.3111 |
| 8333 | M312T26_ | 1.254658 | 0.327294 | 0.344832 | 0.742065 | 0.571642 | UP   | 312.1302 | 312.1296 |
| 8334 | M365T10_ | 1.198592 | 0.261341 | 0.342563 | 0.742106 | 0.571652 | UP   | 365.233  | 365.2316 |
| 8335 | M599T29_ | 1.227623 | 0.295867 | 0.341621 | 0.742195 | 0.571675 | UP   | 599.4371 | 599.4363 |
| 8336 | M237T19  | 1.178269 | 0.236669 | 0.343009 | 0.742196 | 0.571676 | UP   | 237.1852 | 237.1847 |
| 8337 | M1083T32 | 1.294531 | -0.37243 | -0.34398 | 0.742216 | 0.571681 | DOWN | 1082.504 | 1082.502 |
| 8338 | M242T14  | 1.344389 | -0.42695 | -0.34893 | 0.742294 | 0.571701 | DOWN | 242.2844 | 242.2839 |
| 8339 | M673T35  | 1.224089 | 0.291708 | 0.342397 | 0.742337 | 0.571712 | UP   | 673.4931 | 673.4921 |
| 8340 | M519T32_ | 1.235192 | -0.30474 | -0.3435  | 0.742558 | 0.571769 | DOWN | 518.908  | 518.9072 |
| 8341 | M300T16  | 1.282703 | 0.359188 | 0.341048 | 0.742607 | 0.571781 | UP   | 300.126  | 300.1256 |
| 8342 | M439T18_ | 1.211744 | -0.27708 | -0.34567 | 0.742761 | 0.571821 | DOWN | 439.0157 | 439.0146 |
| 8343 | M401T10_ | 1.613647 | 0.690325 | 0.343971 | 0.742778 | 0.571825 | UP   | 401.2828 | 401.2774 |
| 8344 | M358T17_ | 1.239288 | 0.309512 | 0.340122 | 0.742798 | 0.57183  | UP   | 358.0021 | 358.0017 |
| 8345 | M657T41  | 1.181232 | -0.24029 | -0.33963 | 0.742965 | 0.571873 | DOWN | 657.3415 | 657.34   |
| 8346 | M269T30_ | 1.272241 | 0.347372 | 0.34391  | 0.743043 | 0.571893 | UP   | 269.1572 | 269.1569 |
| 8347 | M226T13_ | 1.235054 | 0.304574 | 0.339439 | 0.743165 | 0.571924 | UP   | 226.1803 | 226.1799 |
| 8348 | M280T31_ | 1.25592  | -0.32874 | -0.33975 | 0.743188 | 0.57193  | DOWN | 280.2636 | 280.2634 |
| 8349 | M482T32_ | 1.245268 | 0.316457 | 0.345039 | 0.743398 | 0.571984 | UP   | 482.3771 | 482.3766 |
| 8350 | M236T9   | 1.366204 | 0.450172 | 0.339039 | 0.743479 | 0.572005 | UP   | 236.1246 | 236.119  |
| 8351 | M569T11  | 1.221627 | 0.288803 | 0.34117  | 0.743479 | 0.572005 | UP   | 569.4069 | 569.4056 |
| 8352 | M314T22  | 1.243642 | 0.314572 | 0.341066 | 0.74352  | 0.572015 | UP   | 314.1418 | 314.1368 |
| 8353 | M433T11_ | 1.332019 | 0.413615 | 0.340516 | 0.743592 | 0.572034 | UP   | 432.7054 | 432.7044 |
| 8354 | M555T29  | 1.220349 | 0.287293 | 0.340092 | 0.743624 | 0.572042 | UP   | 555.4105 | 555.4094 |
| 8355 | M485T16  | 1.354231 | 0.437474 | 0.341909 | 0.74367  | 0.572054 | UP   | 485.1122 | 485.112  |
| 8356 | M359T26_ | 1.349549 | 0.432477 | 0.340494 | 0.743739 | 0.572072 | UP   | 359.2197 | 359.2195 |
| 8357 | M1009T28 | 1.253647 | 0.326131 | 0.339262 | 0.743908 | 0.572115 | UP   | 1008.775 | 1008.774 |
| 8358 | M443T13  | 1.190524 | 0.251596 | 0.340049 | 0.74397  | 0.572131 | UP   | 443.1253 | 443.1248 |
| 8359 | M326T19  | 1.420875 | 0.506779 | 0.340292 | 0.74428  | 0.57221  | UP   | 326.1418 | 326.1416 |
| 8360 | M336T29  | 1.215503 | 0.281554 | 0.338507 | 0.744466 | 0.572258 | UP   | 336.2827 | 336.2822 |
| 8361 | M482T18  | 1.308603 | 0.388028 | 0.337708 | 0.744748 | 0.57233  | UP   | 482.1135 | 482.1124 |
| 8362 | M595T31_ | 1.151413 | -0.2034  | -0.33898 | 0.744916 | 0.572373 | DOWN | 595.2657 | 595.2568 |
| 8363 | M663T18  | 1.311429 | 0.39114  | 0.339061 | 0.745113 | 0.572424 | UP   | 662.9426 | 662.9412 |
| 8364 | M387T31_ | 1.126416 | 0.171739 | 0.339603 | 0.745285 | 0.572467 | UP   | 387.2112 | 387.2111 |
| 8365 | M792T26_ | 1.215104 | 0.28108  | 0.337566 | 0.745537 | 0.572532 | UP   | 792.2667 | 792.2649 |

|      |          |          |          |          |          |          |      |          |          |
|------|----------|----------|----------|----------|----------|----------|------|----------|----------|
| 8366 | M587T22_ | 1.288446 | 0.365632 | 0.338328 | 0.745768 | 0.572591 | UP   | 587.0542 | 587.0537 |
| 8367 | M596T27_ | 1.221901 | 0.289127 | 0.338301 | 0.745772 | 0.572592 | UP   | 596.2439 | 596.2429 |
| 8368 | M241T25  | 1.216045 | -0.2822  | -0.34016 | 0.745975 | 0.572644 | DOWN | 241.2164 | 241.216  |
| 8369 | M425T10_ | 1.282109 | 0.358519 | 0.335731 | 0.746131 | 0.572684 | UP   | 425.2527 | 425.252  |
| 8370 | M657T35  | 1.226629 | 0.294699 | 0.335812 | 0.746145 | 0.572687 | UP   | 657.444  | 657.4433 |
| 8371 | M560T21  | 1.259891 | 0.333299 | 0.335746 | 0.746163 | 0.572692 | UP   | 560.0878 | 560.0875 |
| 8372 | M474T15  | 1.341278 | 0.423608 | 0.337636 | 0.746182 | 0.572697 | UP   | 474.1576 | 474.1567 |
| 8373 | M437T25  | 1.269132 | -0.34384 | -0.34187 | 0.746418 | 0.572757 | DOWN | 437.1932 | 437.1929 |
| 8374 | M752T11_ | 1.344026 | 0.426561 | 0.337928 | 0.746505 | 0.572779 | UP   | 751.8938 | 751.8927 |
| 8375 | M650T43_ | 1.072006 | -0.10031 | -0.33462 | 0.746525 | 0.572784 | DOWN | 650.4531 | 650.4527 |
| 8376 | M264T28  | 1.23551  | -0.30511 | -0.33862 | 0.746546 | 0.57279  | DOWN | 264.2534 | 264.253  |
| 8377 | M326T31_ | 1.214326 | 0.280155 | 0.333352 | 0.74744  | 0.573018 | UP   | 326.2327 | 326.2322 |
| 8378 | M393T19_ | 1.362266 | 0.446008 | 0.333501 | 0.747578 | 0.573053 | UP   | 393.2772 | 393.2714 |
| 8379 | M369T35  | 1.052794 | -0.07422 | -0.33527 | 0.747675 | 0.573077 | DOWN | 369.3841 | 369.3835 |
| 8380 | M270T11  | 1.272176 | 0.347298 | 0.338383 | 0.748074 | 0.573179 | UP   | 269.6146 | 269.6143 |
| 8381 | M499T34_ | 1.223356 | 0.290845 | 0.332306 | 0.748216 | 0.573215 | UP   | 499.355  | 499.3519 |
| 8382 | M267T27_ | 1.206209 | -0.27048 | -0.33532 | 0.748338 | 0.573246 | DOWN | 267.1721 | 267.1718 |
| 8383 | M192T14  | 1.209789 | 0.274755 | 0.332469 | 0.748375 | 0.573255 | UP   | 192.1384 | 192.138  |
| 8384 | M294T28_ | 1.193731 | 0.255478 | 0.332829 | 0.748589 | 0.57331  | UP   | 294.2065 | 294.2061 |
| 8385 | M240T12  | 1.384765 | -0.46964 | -0.33812 | 0.748604 | 0.573314 | DOWN | 240.1749 | 240.1747 |
| 8386 | M198T16  | 1.266341 | 0.340666 | 0.332574 | 0.74862  | 0.573318 | UP   | 198.149  | 198.1487 |
| 8387 | M689T37_ | 1.085836 | 0.118806 | 0.336068 | 0.748997 | 0.573413 | UP   | 688.5115 | 688.5111 |
| 8388 | M268T25_ | 1.258698 | -0.33193 | -0.33437 | 0.749135 | 0.573449 | DOWN | 268.1778 | 268.1776 |
| 8389 | M415T31  | 1.449253 | -0.53531 | -0.33543 | 0.749199 | 0.573465 | DOWN | 414.709  | 414.7088 |
| 8390 | M451T22_ | 1.26927  | 0.343999 | 0.331012 | 0.749232 | 0.573473 | UP   | 451.1781 | 451.178  |
| 8391 | M441T18_ | 1.345343 | 0.427974 | 0.332475 | 0.7495   | 0.573541 | UP   | 441.0868 | 441.0866 |
| 8392 | M965T32  | 1.25689  | -0.32986 | -0.33735 | 0.749563 | 0.573557 | DOWN | 965.4425 | 965.4421 |
| 8393 | M308T20  | 1.253261 | 0.325687 | 0.332501 | 0.7496   | 0.573567 | UP   | 308.0947 | 308.0944 |
| 8394 | M228T9_1 | 1.194961 | -0.25696 | -0.33851 | 0.749613 | 0.57357  | DOWN | 227.6767 | 227.6765 |
| 8395 | M288T10  | 1.360127 | -0.44374 | -0.33291 | 0.749917 | 0.573647 | DOWN | 287.7193 | 287.7191 |
| 8396 | M329T37  | 1.226994 | -0.29513 | -0.333   | 0.750089 | 0.573691 | DOWN | 329.3245 | 329.3242 |
| 8397 | M601T24_ | 1.310406 | -0.39001 | -0.33519 | 0.750132 | 0.573701 | DOWN | 601.1142 | 601.114  |
| 8398 | M226T25_ | 1.231321 | -0.30021 | -0.33412 | 0.750292 | 0.573742 | DOWN | 226.2166 | 226.2163 |
| 8399 | M328T40  | 1.221735 | 0.288932 | 0.329123 | 0.750517 | 0.573799 | UP   | 328.2201 | 328.2196 |
| 8400 | M267T25  | 1.251035 | -0.32312 | -0.33302 | 0.750772 | 0.573864 | DOWN | 267.1745 | 267.1739 |
| 8401 | M380T30_ | 1.116358 | -0.1588  | -0.32875 | 0.750797 | 0.57387  | DOWN | 380.2434 | 380.2432 |
| 8402 | M789T45  | 1.049546 | -0.06977 | -0.32872 | 0.750875 | 0.57389  | DOWN | 788.6101 | 788.6086 |
| 8403 | M758T18  | 1.392625 | -0.47781 | -0.33356 | 0.750892 | 0.573894 | DOWN | 758.2413 | 758.2409 |
| 8404 | M699T22  | 1.358095 | -0.44158 | -0.33508 | 0.750918 | 0.573901 | DOWN | 699.1799 | 699.1795 |
| 8405 | M646T30_ | 1.210574 | 0.275691 | 0.329108 | 0.751035 | 0.57393  | UP   | 646.1713 | 646.1699 |
| 8406 | M463T26_ | 1.335326 | -0.41719 | -0.33333 | 0.751115 | 0.57395  | DOWN | 463.051  | 463.0503 |
| 8407 | M312T19_ | 1.270313 | 0.345184 | 0.328923 | 0.751262 | 0.573988 | UP   | 311.9992 | 311.9991 |
| 8408 | M588T21  | 1.338008 | 0.420086 | 0.329326 | 0.751287 | 0.573994 | UP   | 588.3075 | 588.3072 |
| 8409 | M259T40  | 1.205794 | -0.26998 | -0.33302 | 0.751292 | 0.573995 | DOWN | 259.1905 | 259.1903 |
| 8410 | M484T18_ | 1.219777 | 0.286617 | 0.328826 | 0.751381 | 0.574018 | UP   | 484.3938 | 484.3936 |
| 8411 | M702T10_ | 1.360227 | 0.443848 | 0.32812  | 0.751476 | 0.574042 | UP   | 702.0457 | 702.0358 |
| 8412 | M244T13_ | 1.208497 | 0.273214 | 0.327806 | 0.751488 | 0.574045 | UP   | 244.1909 | 244.1905 |

|      |          |          |          |          |          |          |      |          |          |
|------|----------|----------|----------|----------|----------|----------|------|----------|----------|
| 8413 | M929T44  | 1.141142 | -0.19048 | -0.33201 | 0.751708 | 0.5741   | DOWN | 928.5865 | 928.5856 |
| 8414 | M569T42_ | 1.071622 | 0.099796 | 0.332056 | 0.751768 | 0.574115 | UP   | 569.0693 | 569.0689 |
| 8415 | M369T29  | 1.152246 | 0.204448 | 0.33426  | 0.751828 | 0.574131 | UP   | 369.2038 | 369.2036 |
| 8416 | M577T11  | 1.329948 | 0.41137  | 0.331239 | 0.751832 | 0.574132 | UP   | 577.2844 | 577.2841 |
| 8417 | M1144T11 | 1.342189 | 0.424588 | 0.329231 | 0.751842 | 0.574134 | UP   | 1143.566 | 1143.562 |
| 8418 | M406T37  | 1.130696 | 0.177212 | 0.330041 | 0.751881 | 0.574144 | UP   | 406.3319 | 406.3309 |
| 8419 | M570T28_ | 1.122199 | -0.16633 | -0.33244 | 0.751952 | 0.574162 | DOWN | 570.3405 | 570.3398 |
| 8420 | M323T19  | 1.141548 | 0.190992 | 0.327503 | 0.752183 | 0.57422  | UP   | 323.2221 | 323.2213 |
| 8421 | M656T41  | 1.176464 | -0.23446 | -0.32693 | 0.752205 | 0.574226 | DOWN | 656.3387 | 656.3373 |
| 8422 | M255T33  | 1.118821 | -0.16198 | -0.32696 | 0.752356 | 0.574264 | DOWN | 255.2106 | 255.2105 |
| 8423 | M372T9   | 1.323844 | -0.40473 | -0.32654 | 0.752457 | 0.57429  | DOWN | 372.2491 | 372.249  |
| 8424 | M280T31_ | 1.44452  | -0.53059 | -0.33068 | 0.752633 | 0.574334 | DOWN | 280.2448 | 280.2442 |
| 8425 | M545T29  | 1.185821 | -0.24589 | -0.32929 | 0.752773 | 0.574369 | DOWN | 545.3431 | 545.3422 |
| 8426 | M511T29  | 1.20709  | 0.271534 | 0.327461 | 0.752887 | 0.574398 | UP   | 511.384  | 511.3833 |
| 8427 | M253T23  | 1.147895 | 0.198991 | 0.326624 | 0.753111 | 0.574455 | UP   | 253.18   | 253.1797 |
| 8428 | M879T35  | 1.286006 | 0.362898 | 0.32606  | 0.753171 | 0.57447  | UP   | 878.6426 | 878.6414 |
| 8429 | M666T29_ | 1.212361 | -0.27782 | -0.32734 | 0.753336 | 0.574511 | DOWN | 666.2303 | 666.23   |
| 8430 | M317T21_ | 1.197166 | 0.259623 | 0.328169 | 0.753386 | 0.574524 | UP   | 317.2117 | 317.2111 |
| 8431 | M361T31  | 1.184036 | 0.243712 | 0.325255 | 0.753529 | 0.57456  | UP   | 361.2221 | 361.2216 |
| 8432 | M907T25  | 1.280383 | 0.356576 | 0.325036 | 0.753542 | 0.574563 | UP   | 906.6374 | 906.6365 |
| 8433 | M551T44_ | 1.185556 | 0.245564 | 0.325125 | 0.753782 | 0.574625 | UP   | 551.1406 | 551.1398 |
| 8434 | M348T17_ | 1.318957 | -0.3994  | -0.32972 | 0.754316 | 0.574764 | DOWN | 348.1099 | 348.1095 |
| 8435 | M535T18  | 1.314011 | 0.393977 | 0.324011 | 0.75433  | 0.574768 | UP   | 535.2726 | 535.2724 |
| 8436 | M419T28_ | 1.197723 | 0.260294 | 0.324289 | 0.754628 | 0.574845 | UP   | 419.3634 | 419.3625 |
| 8437 | M438T9   | 1.254515 | -0.32713 | -0.32437 | 0.754644 | 0.574849 | DOWN | 438.2394 | 438.2388 |
| 8438 | M415T21_ | 1.249395 | 0.321229 | 0.323738 | 0.754652 | 0.574851 | UP   | 415.1412 | 415.1411 |
| 8439 | M397T16  | 1.315704 | 0.395835 | 0.325537 | 0.754658 | 0.574853 | UP   | 397.2853 | 397.2851 |
| 8440 | M763T34  | 1.219661 | 0.28648  | 0.324648 | 0.754812 | 0.574892 | UP   | 762.5488 | 762.5475 |
| 8441 | M184T29  | 1.193092 | -0.25471 | -0.32556 | 0.754832 | 0.574898 | DOWN | 184.0733 | 184.073  |
| 8442 | M365T22_ | 1.252016 | 0.324252 | 0.324482 | 0.755053 | 0.574955 | UP   | 365.1051 | 365.1048 |
| 8443 | M379T12_ | 1.49959  | 0.584568 | 0.323236 | 0.755735 | 0.575131 | UP   | 379.1682 | 379.1669 |
| 8444 | M373T10_ | 1.194857 | -0.25684 | -0.32192 | 0.755776 | 0.575142 | DOWN | 373.2142 | 373.2136 |
| 8445 | M717T11  | 1.306936 | 0.386189 | 0.32223  | 0.755855 | 0.575163 | UP   | 717.3312 | 717.3302 |
| 8446 | M195T29  | 1.099845 | -0.1373  | -0.32181 | 0.755902 | 0.575175 | DOWN | 195.1227 | 195.1225 |
| 8447 | M294T17  | 1.191122 | 0.252322 | 0.322174 | 0.756508 | 0.575331 | UP   | 294.1703 | 294.1697 |
| 8448 | M600T21  | 1.252699 | 0.32504  | 0.321443 | 0.756508 | 0.575331 | UP   | 600.1182 | 600.1175 |
| 8449 | M510T30  | 1.149474 | -0.20097 | -0.32116 | 0.756538 | 0.575339 | DOWN | 510.3459 | 510.345  |
| 8450 | M333T29_ | 1.168173 | -0.22425 | -0.32193 | 0.756642 | 0.575366 | DOWN | 333.3195 | 333.3189 |
| 8451 | M527T28  | 1.262945 | -0.33679 | -0.32352 | 0.756832 | 0.575415 | DOWN | 527.2963 | 527.2956 |
| 8452 | M588T11  | 1.20485  | 0.268854 | 0.322634 | 0.757041 | 0.575469 | UP   | 588.4212 | 588.4193 |
| 8453 | M468T16  | 1.267825 | 0.342356 | 0.321403 | 0.757175 | 0.575503 | UP   | 468.1665 | 468.1664 |
| 8454 | M331T20_ | 1.239339 | -0.30957 | -0.32206 | 0.757239 | 0.57552  | DOWN | 331.2482 | 331.2475 |
| 8455 | M309T31  | 1.154995 | -0.20789 | -0.32232 | 0.757316 | 0.57554  | DOWN | 309.2061 | 309.2059 |
| 8456 | M270T39  | 1.228618 | 0.297037 | 0.321796 | 0.757403 | 0.575562 | UP   | 270.2792 | 270.2787 |
| 8457 | M599T18  | 1.24123  | 0.31177  | 0.319371 | 0.757638 | 0.575623 | UP   | 599.2218 | 599.2208 |
| 8458 | M403T35  | 1.116701 | -0.15924 | -0.32135 | 0.75765  | 0.575626 | DOWN | 403.2328 | 403.2323 |
| 8459 | M560T29  | 1.249434 | 0.321275 | 0.319621 | 0.757804 | 0.575665 | UP   | 559.8013 | 559.8009 |

|      |          |          |          |          |          |          |      |          |          |
|------|----------|----------|----------|----------|----------|----------|------|----------|----------|
| 8460 | M309T28_ | 1.18461  | 0.244412 | 0.320229 | 0.757923 | 0.575696 | UP   | 309.2064 | 309.2057 |
| 8461 | M303T31_ | 1.198195 | 0.260862 | 0.320148 | 0.758351 | 0.575806 | UP   | 303.1043 | 303.1042 |
| 8462 | M193T20  | 1.185761 | -0.24581 | -0.32066 | 0.758376 | 0.575813 | DOWN | 193.1952 | 193.1949 |
| 8463 | M335T24_ | 1.269703 | 0.344492 | 0.31987  | 0.758578 | 0.575865 | UP   | 335.1828 | 335.1825 |
| 8464 | M310T31_ | 1.103645 | -0.14228 | -0.31865 | 0.758646 | 0.575882 | DOWN | 310.1652 | 310.1651 |
| 8465 | M334T33_ | 1.113626 | 0.155265 | 0.317727 | 0.758894 | 0.575946 | UP   | 334.3379 | 334.3373 |
| 8466 | M464T20_ | 1.191718 | -0.25304 | -0.32004 | 0.7589   | 0.575948 | DOWN | 464.314  | 464.3133 |
| 8467 | M228T30  | 1.183004 | 0.242455 | 0.317742 | 0.759051 | 0.575986 | UP   | 228.2323 | 228.232  |
| 8468 | M274T33  | 1.175227 | 0.23294  | 0.317631 | 0.759053 | 0.575987 | UP   | 274.2095 | 274.209  |
| 8469 | M305T24_ | 1.197602 | -0.26015 | -0.32068 | 0.759525 | 0.576108 | DOWN | 305.1862 | 305.186  |
| 8470 | M576T23_ | 1.238071 | 0.308094 | 0.31862  | 0.759909 | 0.576207 | UP   | 575.9523 | 575.9521 |
| 8471 | M299T21_ | 1.177608 | 0.235859 | 0.317124 | 0.760404 | 0.576334 | UP   | 299.201  | 299.2003 |
| 8472 | M705T9_1 | 1.281657 | 0.358011 | 0.31594  | 0.760695 | 0.576408 | UP   | 704.5046 | 704.503  |
| 8473 | M289T34  | 1.182846 | 0.242263 | 0.315878 | 0.760712 | 0.576413 | UP   | 289.2528 | 289.2524 |
| 8474 | M574T33_ | 1.211772 | -0.27712 | -0.31952 | 0.760885 | 0.576457 | DOWN | 574.378  | 574.3771 |
| 8475 | M547T22_ | 1.204721 | 0.268699 | 0.314922 | 0.760914 | 0.576465 | UP   | 547.1331 | 547.1316 |
| 8476 | M742T32_ | 1.14649  | 0.197224 | 0.316807 | 0.761008 | 0.576489 | UP   | 742.4955 | 742.4951 |
| 8477 | M382T20  | 1.195435 | 0.257536 | 0.316028 | 0.761114 | 0.576516 | UP   | 382.3431 | 382.3427 |
| 8478 | M199T33_ | 1.16965  | 0.226077 | 0.314555 | 0.761315 | 0.576567 | UP   | 199.1329 | 199.1325 |
| 8479 | M371T43  | 1.092558 | 0.127709 | 0.314269 | 0.761363 | 0.57658  | UP   | 371.1012 | 371.1006 |
| 8480 | M370T26  | 1.188241 | -0.24883 | -0.31795 | 0.761452 | 0.576603 | DOWN | 370.2956 | 370.295  |
| 8481 | M569T29_ | 1.178448 | -0.23689 | -0.31683 | 0.761534 | 0.576624 | DOWN | 569.3434 | 569.3423 |
| 8482 | M440T27  | 1.187955 | 0.24848  | 0.315034 | 0.761544 | 0.576626 | UP   | 440.3354 | 440.3348 |
| 8483 | M329T15  | 1.307409 | 0.38671  | 0.316539 | 0.761562 | 0.576631 | UP   | 329.0685 | 329.0677 |
| 8484 | M553T32_ | 1.207295 | 0.271778 | 0.315043 | 0.761662 | 0.576656 | UP   | 553.3949 | 553.3939 |
| 8485 | M407T18_ | 1.269801 | 0.344603 | 0.312846 | 0.762401 | 0.576845 | UP   | 407.135  | 407.1343 |
| 8486 | M283T35  | 1.108895 | 0.149122 | 0.313051 | 0.762617 | 0.576901 | UP   | 283.1751 | 283.1747 |
| 8487 | M541T27  | 1.183535 | -0.2431  | -0.31543 | 0.76263  | 0.576904 | DOWN | 541.4689 | 541.4683 |
| 8488 | M270T25_ | 1.204433 | 0.268354 | 0.312152 | 0.762907 | 0.576975 | UP   | 270.2064 | 270.2059 |
| 8489 | M361T22_ | 1.209794 | 0.274761 | 0.315825 | 0.76291  | 0.576975 | UP   | 360.9883 | 360.9878 |
| 8490 | M719T35  | 1.209986 | 0.27499  | 0.313766 | 0.763013 | 0.577002 | UP   | 718.5224 | 718.521  |
| 8491 | M458T19  | 1.184287 | 0.244019 | 0.312782 | 0.763091 | 0.577022 | UP   | 458.3954 | 458.3949 |
| 8492 | M358T26  | 1.222586 | -0.28994 | -0.31606 | 0.763094 | 0.577022 | DOWN | 358.2015 | 358.2009 |
| 8493 | M893T11  | 1.346216 | 0.42891  | 0.311904 | 0.763191 | 0.577047 | UP   | 893.3399 | 893.3373 |
| 8494 | M720T35  | 1.231197 | 0.300061 | 0.313824 | 0.763207 | 0.577051 | UP   | 719.5252 | 719.5238 |
| 8495 | M399T9_2 | 1.230826 | 0.299627 | 0.314824 | 0.763212 | 0.577052 | UP   | 399.26   | 399.2596 |
| 8496 | M328T16  | 1.304451 | 0.383442 | 0.311172 | 0.763722 | 0.577183 | UP   | 328.1211 | 328.121  |
| 8497 | M327T21  | 1.140315 | -0.18943 | -0.31136 | 0.763786 | 0.577199 | DOWN | 327.0955 | 327.0953 |
| 8498 | M629T35  | 1.2017   | 0.265077 | 0.312784 | 0.76395  | 0.577241 | UP   | 629.467  | 629.4657 |
| 8499 | M973T30  | 1.098124 | 0.135041 | 0.314286 | 0.76427  | 0.577322 | UP   | 972.6472 | 972.6466 |
| 8500 | M460T11  | 1.229272 | 0.297804 | 0.310389 | 0.764528 | 0.577388 | UP   | 460.1643 | 460.1639 |
| 8501 | M550T44_ | 1.076485 | -0.10633 | -0.31485 | 0.764564 | 0.577397 | DOWN | 550.4041 | 550.4037 |
| 8502 | M380T29  | 1.193682 | 0.255418 | 0.311445 | 0.764581 | 0.577401 | UP   | 380.3089 | 380.3082 |
| 8503 | M315T38  | 1.07439  | 0.103518 | 0.309809 | 0.764653 | 0.57742  | UP   | 315.1956 | 315.1953 |
| 8504 | M587T11_ | 1.201466 | 0.264796 | 0.310898 | 0.765165 | 0.57755  | UP   | 587.4178 | 587.4164 |
| 8505 | M335T9_1 | 1.274426 | -0.34985 | -0.30887 | 0.765326 | 0.577591 | DOWN | 334.7296 | 334.7294 |
| 8506 | M275T27_ | 1.187958 | 0.248484 | 0.31078  | 0.765349 | 0.577597 | UP   | 275.1412 | 275.1411 |

|      |          |          |          |          |          |          |      |          |          |
|------|----------|----------|----------|----------|----------|----------|------|----------|----------|
| 8507 | M635T29  | 1.311793 | 0.39154  | 0.315572 | 0.765424 | 0.577616 | UP   | 635.251  | 635.2406 |
| 8508 | M596T32  | 1.329071 | 0.410418 | 0.314564 | 0.765425 | 0.577616 | UP   | 596.2339 | 596.2335 |
| 8509 | M641T31_ | 1.227797 | -0.29607 | -0.31206 | 0.765449 | 0.577622 | DOWN | 641.2639 | 641.2638 |
| 8510 | M577T25  | 1.216097 | 0.282259 | 0.314026 | 0.765508 | 0.577637 | UP   | 577.3933 | 577.3927 |
| 8511 | M150T31  | 1.188979 | 0.249724 | 0.310818 | 0.765585 | 0.577657 | UP   | 150.0266 | 150.0263 |
| 8512 | M221T28_ | 1.174077 | 0.231527 | 0.309558 | 0.765675 | 0.57768  | UP   | 221.1173 | 221.117  |
| 8513 | M521T18_ | 1.169482 | 0.22587  | 0.312041 | 0.765873 | 0.57773  | UP   | 520.9495 | 520.9489 |
| 8514 | M356T17  | 1.21712  | 0.283471 | 0.30886  | 0.765876 | 0.577731 | UP   | 356.0067 | 356.0063 |
| 8515 | M548T31_ | 1.170275 | -0.22685 | -0.30923 | 0.765885 | 0.577733 | DOWN | 548.3617 | 548.3609 |
| 8516 | M674T35  | 1.206601 | 0.270949 | 0.310068 | 0.76598  | 0.577757 | UP   | 674.4959 | 674.4946 |
| 8517 | M413T21_ | 1.2307   | 0.299479 | 0.308177 | 0.76625  | 0.577826 | UP   | 413.161  | 413.1609 |
| 8518 | M295T28_ | 1.181423 | 0.240525 | 0.30817  | 0.766549 | 0.577902 | UP   | 295.2099 | 295.2094 |
| 8519 | M551T31_ | 1.332722 | 0.414376 | 0.307151 | 0.76671  | 0.577943 | UP   | 551.2608 | 551.2603 |
| 8520 | M421T12  | 1.223079 | 0.290518 | 0.30637  | 0.767147 | 0.578053 | UP   | 421.2781 | 421.2778 |
| 8521 | M1838T9  | 1.368513 | 0.452609 | 0.306502 | 0.7672   | 0.578067 | UP   | 1837.514 | 1837.512 |
| 8522 | M620T22  | 1.215172 | 0.281161 | 0.306262 | 0.767255 | 0.578081 | UP   | 620.1757 | 620.1749 |
| 8523 | M544T7   | 1.442441 | 0.528512 | 0.30656  | 0.767543 | 0.578154 | UP   | 544.3163 | 544.3158 |
| 8524 | M420T14  | 1.178837 | 0.237364 | 0.306289 | 0.767647 | 0.57818  | UP   | 420.1292 | 420.1289 |
| 8525 | M646T29  | 1.172416 | 0.229485 | 0.306697 | 0.767818 | 0.578223 | UP   | 646.2656 | 646.2643 |
| 8526 | M185T20  | 1.103442 | -0.14201 | -0.30588 | 0.768075 | 0.578288 | DOWN | 185.0961 | 185.096  |
| 8527 | M196T17  | 1.24297  | -0.31379 | -0.31151 | 0.76808  | 0.57829  | DOWN | 196.0695 | 196.0693 |
| 8528 | M315T27  | 1.201948 | -0.26537 | -0.30824 | 0.768172 | 0.578313 | DOWN | 315.1957 | 315.1952 |
| 8529 | M289T33_ | 1.143754 | -0.19378 | -0.30487 | 0.768446 | 0.578382 | DOWN | 289.2376 | 289.2372 |
| 8530 | M368T10_ | 1.402995 | -0.48851 | -0.31166 | 0.768451 | 0.578384 | DOWN | 367.7533 | 367.7443 |
| 8531 | M1186T29 | 1.259367 | -0.3327  | -0.30764 | 0.768469 | 0.578388 | DOWN | 1186.158 | 1186.158 |
| 8532 | M209T10  | 1.303995 | 0.382938 | 0.304519 | 0.76863  | 0.578429 | UP   | 209.2015 | 209.201  |
| 8533 | M541T29_ | 1.157471 | -0.21098 | -0.30678 | 0.768651 | 0.578434 | DOWN | 540.6725 | 540.6715 |
| 8534 | M324T9_1 | 1.227171 | -0.29534 | -0.30602 | 0.768719 | 0.578452 | DOWN | 323.5277 | 323.5273 |
| 8535 | M365T26_ | 1.342233 | -0.42464 | -0.31    | 0.768745 | 0.578458 | DOWN | 365.1412 | 365.141  |
| 8536 | M557T22  | 1.27323  | -0.34849 | -0.30931 | 0.768943 | 0.578508 | DOWN | 557.1624 | 557.1621 |
| 8537 | M374T9_2 | 1.17421  | -0.23169 | -0.30787 | 0.769012 | 0.578525 | DOWN | 374.237  | 374.2359 |
| 8538 | M578T23  | 1.27892  | 0.354925 | 0.304966 | 0.769041 | 0.578533 | UP   | 577.9478 | 577.9467 |
| 8539 | M403T30_ | 1.216117 | 0.282282 | 0.303685 | 0.769117 | 0.578552 | UP   | 402.5882 | 402.5878 |
| 8540 | M349T34  | 1.160701 | 0.214996 | 0.30386  | 0.769185 | 0.578569 | UP   | 349.2012 | 349.2007 |
| 8541 | M471T10  | 1.256041 | 0.328884 | 0.304327 | 0.769193 | 0.578571 | UP   | 471.3167 | 471.3157 |
| 8542 | M454T32_ | 1.235219 | 0.304767 | 0.307051 | 0.769309 | 0.5786   | UP   | 454.0511 | 454.0502 |
| 8543 | M423T43  | 1.04073  | 0.057596 | 0.303717 | 0.769402 | 0.578624 | UP   | 423.1123 | 423.1117 |
| 8544 | M458T21_ | 1.224794 | 0.292539 | 0.303815 | 0.769578 | 0.578668 | UP   | 458.163  | 458.1619 |
| 8545 | M485T18  | 1.281006 | 0.357277 | 0.303897 | 0.769592 | 0.578672 | UP   | 485.1118 | 485.1115 |
| 8546 | M650T41_ | 1.192221 | -0.25365 | -0.30297 | 0.769638 | 0.578684 | DOWN | 650.4646 | 650.463  |
| 8547 | M368T23  | 1.202232 | -0.26571 | -0.30711 | 0.769889 | 0.578747 | DOWN | 368.2799 | 368.2796 |
| 8548 | M680T16_ | 1.249865 | 0.321772 | 0.306789 | 0.769967 | 0.578767 | UP   | 679.5125 | 679.511  |
| 8549 | M598T31_ | 1.117134 | 0.159802 | 0.302709 | 0.770046 | 0.578787 | UP   | 598.2645 | 598.2635 |
| 8550 | M533T11  | 1.389644 | 0.474716 | 0.302111 | 0.77028  | 0.578845 | UP   | 533.2216 | 533.2205 |
| 8551 | M565T9_2 | 1.16193  | -0.21652 | -0.30255 | 0.770445 | 0.578887 | DOWN | 565.3626 | 565.3586 |
| 8552 | M454T27_ | 1.158949 | -0.21282 | -0.3031  | 0.770693 | 0.57895  | DOWN | 454.3293 | 454.3285 |
| 8553 | M726T31  | 1.237598 | 0.307543 | 0.303641 | 0.770861 | 0.578992 | UP   | 725.5951 | 725.5942 |

|      |          |          |          |          |          |          |      |          |          |
|------|----------|----------|----------|----------|----------|----------|------|----------|----------|
| 8554 | M225T16_ | 1.21031  | 0.275377 | 0.301606 | 0.770903 | 0.579003 | UP   | 225.0799 | 225.0797 |
| 8555 | M266T23_ | 1.168938 | -0.2252  | -0.30523 | 0.770979 | 0.579022 | DOWN | 266.1389 | 266.1387 |
| 8556 | M323T18  | 1.219297 | 0.286049 | 0.300776 | 0.77141  | 0.57913  | UP   | 323.289  | 323.2887 |
| 8557 | M393T19_ | 1.245447 | -0.31666 | -0.3043  | 0.771493 | 0.579151 | DOWN | 393.3804 | 393.3725 |
| 8558 | M559T19  | 1.162032 | 0.216649 | 0.300827 | 0.771576 | 0.579172 | UP   | 559.4071 | 559.4059 |
| 8559 | M443T18_ | 1.281246 | 0.357547 | 0.30094  | 0.771583 | 0.579174 | UP   | 443.0821 | 443.0815 |
| 8560 | M567T35  | 1.204675 | 0.268644 | 0.301814 | 0.77159  | 0.579175 | UP   | 567.4105 | 567.4097 |
| 8561 | M427T20_ | 1.313699 | 0.393635 | 0.301966 | 0.771724 | 0.579209 | UP   | 426.9333 | 426.9332 |
| 8562 | M284T33  | 1.0669   | -0.09343 | -0.30287 | 0.771773 | 0.579222 | DOWN | 284.3312 | 284.3308 |
| 8563 | M764T27  | 1.238974 | -0.30915 | -0.30113 | 0.771989 | 0.579276 | DOWN | 763.5259 | 763.5247 |
| 8564 | M655T35  | 1.216279 | 0.282474 | 0.301262 | 0.772012 | 0.579282 | UP   | 655.4634 | 655.4627 |
| 8565 | M274T30_ | 1.306106 | 0.385272 | 0.304621 | 0.772043 | 0.579289 | UP   | 274.0528 | 274.0527 |
| 8566 | M327T13_ | 1.295146 | 0.373115 | 0.30176  | 0.772153 | 0.579317 | UP   | 326.939  | 326.9388 |
| 8567 | M503T28  | 1.238484 | -0.30858 | -0.30174 | 0.772271 | 0.579347 | DOWN | 503.2963 | 503.2956 |
| 8568 | M571T17  | 1.30773  | 0.387065 | 0.299748 | 0.772717 | 0.579459 | UP   | 571.0329 | 571.0325 |
| 8569 | M498T27_ | 1.17382  | -0.23121 | -0.30021 | 0.772838 | 0.579489 | DOWN | 497.5296 | 497.5285 |
| 8570 | M401T21_ | 1.215163 | -0.28115 | -0.30209 | 0.773154 | 0.579569 | DOWN | 401.3574 | 401.357  |
| 8571 | M315T24_ | 1.219298 | -0.28605 | -0.30251 | 0.773184 | 0.579576 | DOWN | 315.1954 | 315.1954 |
| 8572 | M523T18  | 1.285019 | 0.36179  | 0.298685 | 0.773672 | 0.579698 | UP   | 523.1401 | 523.1395 |
| 8573 | M630T35  | 1.199047 | 0.261888 | 0.298942 | 0.773998 | 0.57978  | UP   | 630.4697 | 630.4685 |
| 8574 | M661T9_1 | 1.406367 | -0.49197 | -0.30235 | 0.774193 | 0.579829 | DOWN | 660.5062 | 660.5017 |
| 8575 | M312T38  | 1.058292 | -0.08174 | -0.29865 | 0.774204 | 0.579832 | DOWN | 312.3625 | 312.3619 |
| 8576 | M297T22_ | 1.227896 | -0.29619 | -0.30204 | 0.774334 | 0.579864 | DOWN | 297.1113 | 297.1104 |
| 8577 | M326T35  | 1.126836 | 0.172278 | 0.29759  | 0.774354 | 0.579869 | UP   | 326.3783 | 326.3776 |
| 8578 | M259T30_ | 1.186754 | 0.24702  | 0.296972 | 0.774471 | 0.579898 | UP   | 259.1905 | 259.1903 |
| 8579 | M236T19_ | 1.174032 | 0.231472 | 0.296484 | 0.77449  | 0.579903 | UP   | 236.1299 | 236.1298 |
| 8580 | M444T10  | 1.200025 | 0.263064 | 0.299084 | 0.774714 | 0.579959 | UP   | 444.3387 | 444.3368 |
| 8581 | M495T27_ | 1.184224 | -0.24394 | -0.2987  | 0.774793 | 0.579979 | DOWN | 495.3277 | 495.3268 |
| 8582 | M372T34  | 1.258302 | -0.33148 | -0.30155 | 0.774806 | 0.579982 | DOWN | 372.2899 | 372.2891 |
| 8583 | M524T31_ | 1.226776 | -0.29487 | -0.29588 | 0.774857 | 0.579995 | DOWN | 524.2999 | 524.2982 |
| 8584 | M309T28_ | 1.203154 | 0.266822 | 0.296386 | 0.774882 | 0.580001 | UP   | 309.2831 | 309.2824 |
| 8585 | M394T31  | 1.193595 | -0.25531 | -0.29748 | 0.774885 | 0.580002 | DOWN | 394.2741 | 394.2738 |
| 8586 | M411T19  | 1.153902 | 0.206521 | 0.297763 | 0.774962 | 0.580021 | UP   | 411.3413 | 411.3409 |
| 8587 | M483T20_ | 1.178751 | 0.237259 | 0.296536 | 0.775052 | 0.580044 | UP   | 483.3909 | 483.3897 |
| 8588 | M553T27  | 1.257469 | -0.33052 | -0.30082 | 0.775145 | 0.580067 | DOWN | 553.022  | 553.0213 |
| 8589 | M697T10_ | 1.294674 | 0.372589 | 0.295123 | 0.775415 | 0.580135 | UP   | 697.4638 | 697.4625 |
| 8590 | M330T28_ | 1.349157 | -0.43206 | -0.29514 | 0.775415 | 0.580135 | DOWN | 330.0046 | 330.0038 |
| 8591 | M385T23_ | 1.161738 | 0.216285 | 0.296639 | 0.775516 | 0.58016  | UP   | 385.3424 | 385.3418 |
| 8592 | M318T32  | 1.171164 | 0.227943 | 0.29554  | 0.775645 | 0.580192 | UP   | 318.2642 | 318.2641 |
| 8593 | M483T16  | 1.15699  | 0.210376 | 0.294738 | 0.775744 | 0.580217 | UP   | 483.3431 | 483.3419 |
| 8594 | M554T27_ | 1.26081  | -0.33435 | -0.29937 | 0.775982 | 0.580276 | DOWN | 554.0255 | 554.0249 |
| 8595 | M457T20  | 1.28565  | 0.362498 | 0.294469 | 0.776096 | 0.580305 | UP   | 457.0593 | 457.0591 |
| 8596 | M400T21_ | 1.235262 | 0.304817 | 0.294457 | 0.7761   | 0.580306 | UP   | 400.1293 | 400.1289 |
| 8597 | M301T31_ | 1.200692 | -0.26387 | -0.29723 | 0.776204 | 0.580332 | DOWN | 301.1588 | 301.1582 |
| 8598 | M333T37_ | 1.232439 | -0.30152 | -0.29792 | 0.77628  | 0.580351 | DOWN | 333.2762 | 333.2753 |
| 8599 | M376T28_ | 1.164307 | -0.21947 | -0.29642 | 0.776357 | 0.58037  | DOWN | 376.285  | 376.2844 |
| 8600 | M524T35_ | 1.189722 | -0.25062 | -0.29596 | 0.776456 | 0.580395 | DOWN | 524.3874 | 524.3868 |

|      |          |          |          |          |          |          |      |          |          |
|------|----------|----------|----------|----------|----------|----------|------|----------|----------|
| 8601 | M812T23  | 1.266406 | -0.34074 | -0.2957  | 0.776531 | 0.580413 | DOWN | 812.0794 | 812.079  |
| 8602 | M691T10_ | 1.229497 | 0.298069 | 0.293244 | 0.776815 | 0.580484 | UP   | 691.005  | 691.0038 |
| 8603 | M256T9_2 | 1.303203 | 0.382062 | 0.293434 | 0.776927 | 0.580512 | UP   | 256.133  | 256.1323 |
| 8604 | M297T27  | 1.183901 | -0.24355 | -0.29579 | 0.777408 | 0.580632 | DOWN | 297.2427 | 297.2422 |
| 8605 | M814T11  | 1.193791 | 0.25555  | 0.293589 | 0.77767  | 0.580697 | UP   | 813.5861 | 813.585  |
| 8606 | M816T11_ | 1.345507 | -0.42815 | -0.29829 | 0.777802 | 0.58073  | DOWN | 816.3277 | 816.3248 |
| 8607 | M342T9_1 | 1.225056 | 0.292847 | 0.291428 | 0.778182 | 0.580824 | UP   | 341.5826 | 341.582  |
| 8608 | M353T29  | 1.188128 | 0.248691 | 0.291939 | 0.778494 | 0.580902 | UP   | 353.3092 | 353.3086 |
| 8609 | M657T18  | 1.261165 | 0.334757 | 0.291604 | 0.778629 | 0.580936 | UP   | 657.1325 | 657.1323 |
| 8610 | M728T21  | 1.244357 | -0.3154  | -0.29239 | 0.778802 | 0.580979 | DOWN | 728.363  | 728.3625 |
| 8611 | M237T9   | 1.288337 | 0.36551  | 0.290175 | 0.77912  | 0.581058 | UP   | 236.6265 | 236.6262 |
| 8612 | M361T27_ | 1.170333 | -0.22692 | -0.29292 | 0.779127 | 0.58106  | DOWN | 361.2852 | 361.2847 |
| 8613 | M529T24_ | 1.208569 | 0.2733   | 0.29055  | 0.779216 | 0.581082 | UP   | 529.4326 | 529.432  |
| 8614 | M270T13_ | 1.152703 | 0.205021 | 0.291403 | 0.779237 | 0.581087 | UP   | 270.2065 | 270.2063 |
| 8615 | M289T22  | 1.185875 | 0.245952 | 0.29029  | 0.779284 | 0.581098 | UP   | 289.2934 | 289.2927 |
| 8616 | M411T32_ | 1.172843 | -0.23001 | -0.28985 | 0.779305 | 0.581104 | DOWN | 411.3257 | 411.3256 |
| 8617 | M495T31_ | 1.123841 | -0.16844 | -0.29081 | 0.779316 | 0.581106 | DOWN | 494.7779 | 494.7774 |
| 8618 | M298T31_ | 1.295418 | 0.373418 | 0.293296 | 0.779447 | 0.581139 | UP   | 298.3468 | 298.3464 |
| 8619 | M308T15  | 1.248848 | -0.3206  | -0.29063 | 0.77948  | 0.581147 | DOWN | 308.0899 | 308.0891 |
| 8620 | M983T27  | 1.185814 | -0.24588 | -0.29187 | 0.779494 | 0.581151 | DOWN | 983.4544 | 983.4531 |
| 8621 | M275T32_ | 1.17353  | 0.230854 | 0.289949 | 0.779533 | 0.58116  | UP   | 275.2131 | 275.2127 |
| 8622 | M322T11  | 1.331939 | -0.41353 | -0.29366 | 0.779647 | 0.581188 | DOWN | 321.6737 | 321.6735 |
| 8623 | M270T30  | 1.163868 | 0.218927 | 0.290448 | 0.779859 | 0.581241 | UP   | 270.251  | 270.2504 |
| 8624 | M479T36  | 1.187796 | 0.248287 | 0.290389 | 0.779944 | 0.581262 | UP   | 479.358  | 479.3575 |
| 8625 | M328T19  | 1.159947 | -0.21406 | -0.29268 | 0.780068 | 0.581293 | DOWN | 328.2122 | 328.2119 |
| 8626 | M309T26_ | 1.205893 | -0.2701  | -0.29326 | 0.780538 | 0.581409 | DOWN | 309.2064 | 309.2057 |
| 8627 | M631T35  | 1.244765 | -0.31587 | -0.29134 | 0.780639 | 0.581434 | DOWN | 631.4718 | 631.471  |
| 8628 | M560T32_ | 1.154047 | -0.2067  | -0.28857 | 0.780707 | 0.581451 | DOWN | 560.4505 | 560.4501 |
| 8629 | M277T28_ | 1.164834 | 0.220125 | 0.28881  | 0.780797 | 0.581474 | UP   | 277.18   | 277.1795 |
| 8630 | M579T22  | 1.330096 | -0.41153 | -0.28828 | 0.781069 | 0.581541 | DOWN | 579.0208 | 579.0201 |
| 8631 | M630T20  | 1.205499 | -0.26963 | -0.28912 | 0.781338 | 0.581608 | DOWN | 630.4432 | 630.4426 |
| 8632 | M378T10_ | 1.324953 | 0.405941 | 0.286891 | 0.781652 | 0.581685 | UP   | 378.1513 | 378.1511 |
| 8633 | M244T23_ | 1.177761 | -0.23605 | -0.2881  | 0.781736 | 0.581706 | DOWN | 244.0097 | 244.0094 |
| 8634 | M415T23_ | 1.11924  | 0.162519 | 0.289098 | 0.781797 | 0.581721 | UP   | 415.2116 | 415.2107 |
| 8635 | M583T29_ | 1.180702 | 0.239644 | 0.288571 | 0.781909 | 0.581749 | UP   | 583.2528 | 583.2521 |
| 8636 | M332T15  | 1.145329 | 0.195762 | 0.28729  | 0.782035 | 0.58178  | UP   | 332.2224 | 332.2223 |
| 8637 | M493T20  | 1.184273 | 0.244002 | 0.286085 | 0.782145 | 0.581807 | UP   | 493.3061 | 493.3058 |
| 8638 | M642T17_ | 1.149611 | 0.201146 | 0.286313 | 0.782196 | 0.58182  | UP   | 642.4654 | 642.4638 |
| 8639 | M513T10  | 1.17047  | -0.22709 | -0.28597 | 0.782293 | 0.581844 | DOWN | 513.1794 | 513.1781 |
| 8640 | M411T37  | 1.12244  | 0.166638 | 0.285272 | 0.782687 | 0.581941 | UP   | 411.2193 | 411.2138 |
| 8641 | M462T23_ | 1.207889 | 0.272488 | 0.285029 | 0.782891 | 0.581991 | UP   | 462.3531 | 462.3524 |
| 8642 | M255T22_ | 1.230135 | 0.298817 | 0.285734 | 0.782911 | 0.581996 | UP   | 255.2639 | 255.2637 |
| 8643 | M951T25  | 1.25237  | 0.32466  | 0.28488  | 0.782984 | 0.582014 | UP   | 950.6641 | 950.6629 |
| 8644 | M301T10  | 1.238882 | 0.309039 | 0.284947 | 0.782991 | 0.582016 | UP   | 301.1627 | 301.1626 |
| 8645 | M174T12  | 1.175262 | 0.232983 | 0.287121 | 0.783068 | 0.582035 | UP   | 174.149  | 174.1488 |
| 8646 | M688T26_ | 1.200098 | -0.26315 | -0.28859 | 0.783476 | 0.582135 | DOWN | 687.543  | 687.5417 |
| 8647 | M249T27_ | 1.168369 | 0.224495 | 0.28554  | 0.78353  | 0.582149 | UP   | 249.1851 | 249.1846 |



|      |          |          |          |          |          |          |      |          |          |
|------|----------|----------|----------|----------|----------|----------|------|----------|----------|
| 8648 | M386T23_ | 1.156323 | 0.209544 | 0.285157 | 0.783935 | 0.582249 | UP   | 386.3457 | 386.3452 |
| 8649 | M770T10  | 1.29649  | 0.374611 | 0.28382  | 0.784099 | 0.582289 | UP   | 770.4135 | 770.4117 |
| 8650 | M697T9_3 | 1.258665 | 0.331894 | 0.284081 | 0.784371 | 0.582356 | UP   | 697.1246 | 697.1236 |
| 8651 | M444T17  | 1.177703 | -0.23598 | -0.28528 | 0.784497 | 0.582387 | DOWN | 444.2132 | 444.212  |
| 8652 | M329T20  | 1.115797 | -0.15807 | -0.28443 | 0.784516 | 0.582392 | DOWN | 329.0055 | 329.0048 |
| 8653 | M428T27_ | 1.176366 | 0.234337 | 0.283348 | 0.784529 | 0.582395 | UP   | 428.1521 | 428.1516 |
| 8654 | M700T9_2 | 1.384567 | -0.46943 | -0.28764 | 0.784561 | 0.582403 | DOWN | 700.3977 | 700.3962 |
| 8655 | M584T24  | 1.110063 | 0.150642 | 0.284036 | 0.784625 | 0.582418 | UP   | 584.2607 | 584.2607 |
| 8656 | M422T38_ | 1.145776 | 0.196325 | 0.282621 | 0.78466  | 0.582427 | UP   | 422.2901 | 422.2895 |
| 8657 | M453T21_ | 1.206557 | 0.270896 | 0.283482 | 0.784735 | 0.582446 | UP   | 453.1842 | 453.1837 |
| 8658 | M371T21_ | 1.212975 | 0.27855  | 0.282802 | 0.784854 | 0.582475 | UP   | 371.1309 | 371.13   |
| 8659 | M583T26  | 1.394557 | -0.47981 | -0.28922 | 0.784892 | 0.582484 | DOWN | 583.1975 | 583.1974 |
| 8660 | M630T29_ | 1.184074 | -0.24376 | -0.2846  | 0.784941 | 0.582496 | DOWN | 630.4425 | 630.4417 |
| 8661 | M360T18  | 1.18153  | 0.240657 | 0.283891 | 0.784996 | 0.58251  | UP   | 360.0045 | 360.0039 |
| 8662 | M313T44  | 1.123032 | -0.1674  | -0.29055 | 0.785046 | 0.582522 | DOWN | 313.1675 | 313.1674 |
| 8663 | M256T24  | 1.190956 | -0.25212 | -0.28661 | 0.785066 | 0.582527 | DOWN | 256.2635 | 256.2631 |
| 8664 | M349T10_ | 1.21188  | 0.277247 | 0.28132  | 0.785708 | 0.582685 | UP   | 348.7305 | 348.7296 |
| 8665 | M530T29  | 1.178467 | 0.236911 | 0.282444 | 0.785769 | 0.5827   | UP   | 530.4168 | 530.4161 |
| 8666 | M454T21_ | 1.209412 | 0.274306 | 0.281751 | 0.785936 | 0.582741 | UP   | 454.1875 | 454.1867 |
| 8667 | M443T37  | 1.166141 | 0.221742 | 0.283753 | 0.786018 | 0.582761 | UP   | 443.1582 | 443.158  |
| 8668 | M272T2   | 1.165086 | -0.22044 | -0.28137 | 0.786389 | 0.582852 | DOWN | 271.9162 | 271.9159 |
| 8669 | M304T28  | 1.138455 | 0.187077 | 0.280976 | 0.786645 | 0.582914 | UP   | 304.3    | 304.2996 |
| 8670 | M250T27  | 1.163428 | 0.218382 | 0.28076  | 0.786709 | 0.58293  | UP   | 250.1884 | 250.188  |
| 8671 | M521T28  | 1.169083 | -0.22538 | -0.28223 | 0.786749 | 0.58294  | DOWN | 521.3432 | 521.3426 |
| 8672 | M658T41_ | 1.180911 | -0.2399  | -0.27985 | 0.78682  | 0.582957 | DOWN | 658.2343 | 658.2328 |
| 8673 | M227T32  | 1.154257 | 0.206964 | 0.280856 | 0.786952 | 0.58299  | UP   | 227.2007 | 227.2002 |
| 8674 | M739T26  | 1.182974 | 0.242419 | 0.280236 | 0.787273 | 0.583069 | UP   | 739.1939 | 739.1912 |
| 8675 | M464T9_2 | 1.217054 | -0.28339 | -0.28287 | 0.787289 | 0.583072 | DOWN | 464.3286 | 464.3278 |
| 8676 | M523T32  | 1.168976 | -0.22525 | -0.27994 | 0.787725 | 0.583179 | DOWN | 523.359  | 523.358  |
| 8677 | M255T19_ | 1.135232 | 0.182987 | 0.27866  | 0.787759 | 0.583187 | UP   | 255.1957 | 255.1951 |
| 8678 | M322T34  | 1.082896 | 0.114895 | 0.28238  | 0.787813 | 0.583201 | UP   | 322.246  | 322.246  |
| 8679 | M548T27  | 1.182652 | 0.242025 | 0.280949 | 0.787813 | 0.583201 | UP   | 548.2437 | 548.2425 |
| 8680 | M238T26  | 1.182906 | 0.242335 | 0.278343 | 0.787922 | 0.583227 | UP   | 238.1803 | 238.1799 |
| 8681 | M356T31  | 1.103197 | -0.14169 | -0.27945 | 0.78823  | 0.583303 | DOWN | 356.3351 | 356.3349 |
| 8682 | M494T31_ | 1.173255 | -0.23052 | -0.27904 | 0.788333 | 0.583328 | DOWN | 494.3604 | 494.3601 |
| 8683 | M688T22  | 1.191378 | -0.25263 | -0.28201 | 0.788346 | 0.583331 | DOWN | 688.4858 | 688.4856 |
| 8684 | M489T24  | 1.183092 | 0.242563 | 0.278261 | 0.788628 | 0.5834   | UP   | 489.3801 | 489.379  |
| 8685 | M309T23_ | 1.116425 | 0.158886 | 0.285099 | 0.788691 | 0.583415 | UP   | 308.8633 | 308.8629 |
| 8686 | M303T24_ | 1.204908 | -0.26892 | -0.27893 | 0.788847 | 0.583453 | DOWN | 302.7502 | 302.7499 |
| 8687 | M643T21  | 1.26475  | 0.338852 | 0.277381 | 0.788968 | 0.583483 | UP   | 643.4829 | 643.4823 |
| 8688 | M411T20  | 1.153268 | -0.20573 | -0.27734 | 0.789471 | 0.583606 | DOWN | 411.2145 | 411.2135 |
| 8689 | M343T11_ | 1.127742 | 0.173437 | 0.27618  | 0.789525 | 0.583619 | UP   | 343.2595 | 343.259  |
| 8690 | M367T10_ | 1.313693 | -0.39363 | -0.27755 | 0.78953  | 0.58362  | DOWN | 367.1881 | 367.1869 |
| 8691 | M395T34_ | 1.203219 | 0.266899 | 0.275831 | 0.789772 | 0.583679 | UP   | 395.1407 | 395.1404 |
| 8692 | M294T32_ | 1.176997 | 0.23511  | 0.282133 | 0.789779 | 0.583681 | UP   | 294.1357 | 294.1354 |
| 8693 | M351T22_ | 1.176008 | -0.2339  | -0.27801 | 0.789789 | 0.583683 | DOWN | 351.1807 | 351.1802 |
| 8694 | M247T15  | 1.162447 | 0.217165 | 0.277662 | 0.789824 | 0.583692 | UP   | 247.1734 | 247.1726 |

|      |          |          |          |          |          |          |      |          |          |
|------|----------|----------|----------|----------|----------|----------|------|----------|----------|
| 8695 | M544T30  | 1.126722 | -0.17213 | -0.27653 | 0.78991  | 0.583713 | DOWN | 544.3402 | 544.3397 |
| 8696 | M370T10_ | 1.282312 | 0.358747 | 0.276068 | 0.790046 | 0.583746 | UP   | 369.7761 | 369.7758 |
| 8697 | M455T21_ | 1.189464 | 0.250312 | 0.275846 | 0.790518 | 0.583861 | UP   | 455.1845 | 455.1831 |
| 8698 | M491T10  | 1.275361 | -0.35091 | -0.278   | 0.790866 | 0.583946 | DOWN | 491.1609 | 491.16   |
| 8699 | M447T12  | 1.195625 | -0.25777 | -0.27477 | 0.791285 | 0.584048 | DOWN | 447.2933 | 447.293  |
| 8700 | M552T22  | 1.154722 | 0.207546 | 0.274523 | 0.791372 | 0.584069 | UP   | 552.2232 | 552.2221 |
| 8701 | M454T29  | 1.197577 | 0.260118 | 0.279265 | 0.7914   | 0.584076 | UP   | 454.3374 | 454.337  |
| 8702 | M291T23_ | 1.177187 | -0.23534 | -0.27416 | 0.791569 | 0.584117 | DOWN | 291.1798 | 291.1795 |
| 8703 | M526T18  | 1.245276 | 0.316465 | 0.274003 | 0.791674 | 0.584142 | UP   | 526.1388 | 526.1379 |
| 8704 | M655T41_ | 1.130683 | -0.17719 | -0.27301 | 0.791799 | 0.584173 | DOWN | 655.3356 | 655.3342 |
| 8705 | M534T43  | 1.10014  | 0.137687 | 0.273761 | 0.791874 | 0.584191 | UP   | 534.3425 | 534.3416 |
| 8706 | M256T33  | 1.200293 | -0.26339 | -0.2757  | 0.791945 | 0.584208 | DOWN | 256.2636 | 256.2633 |
| 8707 | M546T29  | 1.150485 | -0.20224 | -0.27427 | 0.792038 | 0.584231 | DOWN | 546.3461 | 546.3452 |
| 8708 | M208T11  | 1.119428 | 0.162761 | 0.27252  | 0.792221 | 0.584275 | UP   | 208.079  | 208.0753 |
| 8709 | M191T26_ | 1.141447 | -0.19086 | -0.27455 | 0.792265 | 0.584286 | DOWN | 191.1067 | 191.1065 |
| 8710 | M542T27_ | 1.168155 | 0.224231 | 0.274284 | 0.792321 | 0.5843   | UP   | 542.3902 | 542.3891 |
| 8711 | M345T17  | 1.189466 | -0.25031 | -0.27331 | 0.792352 | 0.584307 | DOWN | 345.2064 | 345.2055 |
| 8712 | M468T20_ | 1.179025 | -0.23759 | -0.27333 | 0.792446 | 0.58433  | DOWN | 468.3519 | 468.3506 |
| 8713 | M286T30_ | 1.146784 | 0.197593 | 0.272248 | 0.792862 | 0.584431 | UP   | 286.2742 | 286.2738 |
| 8714 | M296T28_ | 1.172073 | 0.229062 | 0.272098 | 0.792986 | 0.584461 | UP   | 295.6767 | 295.6763 |
| 8715 | M495T20  | 1.307385 | 0.386684 | 0.273164 | 0.793158 | 0.584503 | UP   | 495.0403 | 495.0398 |
| 8716 | M472T30_ | 1.118003 | 0.160925 | 0.271321 | 0.793264 | 0.584528 | UP   | 472.3635 | 472.3628 |
| 8717 | M592T11_ | 1.295927 | 0.373984 | 0.273839 | 0.793359 | 0.584551 | UP   | 592.2971 | 592.2957 |
| 8718 | M584T29_ | 1.20493  | 0.26895  | 0.27122  | 0.793485 | 0.584582 | UP   | 583.8014 | 583.8006 |
| 8719 | M542T29_ | 1.213095 | 0.278692 | 0.270535 | 0.793707 | 0.584636 | UP   | 542.39   | 542.3891 |
| 8720 | M743T27  | 1.184547 | 0.244335 | 0.272919 | 0.793849 | 0.58467  | UP   | 743.1782 | 743.1777 |
| 8721 | M396T34  | 1.123045 | 0.167416 | 0.270227 | 0.793856 | 0.584672 | UP   | 396.3321 | 396.3317 |
| 8722 | M249T26  | 1.162628 | -0.21739 | -0.27175 | 0.793956 | 0.584696 | DOWN | 249.185  | 249.1847 |
| 8723 | M237T25  | 1.240099 | 0.310455 | 0.272534 | 0.794197 | 0.584754 | UP   | 237.185  | 237.1846 |
| 8724 | M295T2   | 1.255199 | 0.327917 | 0.272636 | 0.794206 | 0.584756 | UP   | 294.8834 | 294.8831 |
| 8725 | M200T31_ | 1.142022 | 0.191591 | 0.270052 | 0.794229 | 0.584762 | UP   | 200.0832 | 200.0832 |
| 8726 | M239T20  | 1.157075 | -0.21048 | -0.26967 | 0.794484 | 0.584824 | DOWN | 239.162  | 239.1615 |
| 8727 | M157T7   | 1.338001 | -0.42008 | -0.27099 | 0.794515 | 0.584831 | DOWN | 157.0836 | 157.0832 |
| 8728 | M252T24  | 1.187163 | -0.24752 | -0.27126 | 0.794597 | 0.584851 | DOWN | 252.1051 | 252.1051 |
| 8729 | M721T20  | 1.23223  | -0.30127 | -0.27091 | 0.794637 | 0.584861 | DOWN | 721.4183 | 721.4179 |
| 8730 | M628T11_ | 1.291623 | -0.36919 | -0.27167 | 0.794755 | 0.584889 | DOWN | 627.5066 | 627.5044 |
| 8731 | M906T9   | 1.224873 | 0.292632 | 0.271488 | 0.794775 | 0.584894 | UP   | 905.6812 | 905.6787 |
| 8732 | M748T35  | 1.224165 | -0.2918  | -0.27435 | 0.794784 | 0.584896 | DOWN | 747.567  | 747.566  |
| 8733 | M295T25_ | 1.141085 | -0.19041 | -0.27157 | 0.794836 | 0.584909 | DOWN | 295.1907 | 295.1903 |
| 8734 | M638T19  | 1.143102 | 0.192954 | 0.269214 | 0.794849 | 0.584912 | UP   | 638.3027 | 638.3008 |
| 8735 | M297T18  | 1.1275   | 0.173127 | 0.270078 | 0.794922 | 0.58493  | UP   | 297.2066 | 297.2065 |
| 8736 | M211T16_ | 1.202148 | -0.26561 | -0.26939 | 0.795051 | 0.584961 | DOWN | 211.1694 | 211.1693 |
| 8737 | M355T31  | 1.130492 | -0.17695 | -0.26898 | 0.795101 | 0.584973 | DOWN | 355.3319 | 355.3313 |
| 8738 | M426T34  | 1.129091 | -0.17516 | -0.26895 | 0.795238 | 0.585006 | DOWN | 426.3579 | 426.3573 |
| 8739 | M427T22_ | 1.277108 | -0.35288 | -0.26885 | 0.795298 | 0.585021 | DOWN | 427.1241 | 427.1238 |
| 8740 | M431T11_ | 1.270408 | 0.345292 | 0.271376 | 0.795539 | 0.585079 | UP   | 431.2034 | 431.2023 |
| 8741 | M702T10_ | 1.149766 | 0.20134  | 0.268044 | 0.795584 | 0.58509  | UP   | 702.1143 | 702.1046 |

|      |          |          |          |          |          |          |      |          |          |
|------|----------|----------|----------|----------|----------|----------|------|----------|----------|
| 8742 | M516T30_ | 1.033805 | 0.047965 | 0.268936 | 0.795731 | 0.585125 | UP   | 516.361  | 516.359  |
| 8743 | M652T20  | 1.236828 | -0.30664 | -0.26936 | 0.796003 | 0.585191 | DOWN | 652.1712 | 652.1709 |
| 8744 | M557T12  | 1.318744 | 0.399165 | 0.267567 | 0.796076 | 0.585208 | UP   | 557.3025 | 557.2975 |
| 8745 | M225T10_ | 1.368216 | -0.4523  | -0.27139 | 0.796079 | 0.585209 | DOWN | 225.421  | 225.4209 |
| 8746 | M255T9_2 | 1.266111 | 0.340404 | 0.26703  | 0.79628  | 0.585258 | UP   | 255.1353 | 255.1346 |
| 8747 | M317T17  | 1.185145 | 0.245064 | 0.267054 | 0.796846 | 0.585394 | UP   | 316.9756 | 316.9752 |
| 8748 | M498T11_ | 1.152044 | 0.204196 | 0.268387 | 0.796883 | 0.585403 | UP   | 498.3545 | 498.3533 |
| 8749 | M543T9   | 1.290558 | 0.367995 | 0.265344 | 0.797489 | 0.585549 | UP   | 543.2395 | 543.238  |
| 8750 | M496T17  | 1.242983 | 0.313807 | 0.269202 | 0.797561 | 0.585566 | UP   | 496.0355 | 496.0353 |
| 8751 | M461T18_ | 1.2747   | 0.350158 | 0.266196 | 0.797647 | 0.585587 | UP   | 461.093  | 461.0926 |
| 8752 | M272T14  | 1.194937 | -0.25693 | -0.26601 | 0.798047 | 0.585683 | DOWN | 272.1915 | 272.1914 |
| 8753 | M384T35  | 1.105672 | 0.144924 | 0.264611 | 0.798047 | 0.585683 | UP   | 384.3475 | 384.347  |
| 8754 | M465T26_ | 1.145467 | -0.19594 | -0.26605 | 0.798152 | 0.585708 | DOWN | 465.3356 | 465.3352 |
| 8755 | M507T20  | 1.200032 | -0.26307 | -0.2687  | 0.79817  | 0.585713 | DOWN | 507.2451 | 507.2439 |
| 8756 | M292T21  | 1.173395 | 0.230689 | 0.271495 | 0.798259 | 0.585734 | UP   | 292.191  | 292.1906 |
| 8757 | M690T22  | 1.211259 | 0.276508 | 0.263974 | 0.798473 | 0.585786 | UP   | 690.4649 | 690.4631 |
| 8758 | M534T31_ | 1.121939 | -0.16599 | -0.26472 | 0.798669 | 0.585833 | DOWN | 534.3555 | 534.355  |
| 8759 | M485T9_5 | 1.191832 | 0.25318  | 0.264868 | 0.798696 | 0.585839 | UP   | 485.3693 | 485.3681 |
| 8760 | M902T32  | 1.180556 | 0.239467 | 0.263879 | 0.798748 | 0.585852 | UP   | 902.4686 | 902.4672 |
| 8761 | M235T14  | 1.093158 | -0.1285  | -0.26352 | 0.799017 | 0.585916 | DOWN | 235.1905 | 235.1901 |
| 8762 | M288T12  | 1.167251 | 0.223115 | 0.263201 | 0.799062 | 0.585927 | UP   | 288.1667 | 288.1664 |
| 8763 | M594T23  | 1.292623 | -0.3703  | -0.26765 | 0.799112 | 0.585939 | DOWN | 594.3717 | 594.3711 |
| 8764 | M271T39  | 1.207167 | 0.271626 | 0.265415 | 0.799149 | 0.585948 | UP   | 271.2825 | 271.282  |
| 8765 | M359T26_ | 1.176772 | -0.23483 | -0.26416 | 0.799278 | 0.585979 | DOWN | 359.2583 | 359.2575 |
| 8766 | M692T33  | 1.144439 | 0.194641 | 0.263749 | 0.799384 | 0.586004 | UP   | 692.459  | 692.4579 |
| 8767 | M625T30_ | 1.246574 | 0.317968 | 0.263419 | 0.799537 | 0.586041 | UP   | 624.7768 | 624.776  |
| 8768 | M760T18_ | 1.259762 | 0.333151 | 0.262915 | 0.799615 | 0.58606  | UP   | 760.056  | 760.0552 |
| 8769 | M368T40  | 1.101907 | -0.14    | -0.26272 | 0.799641 | 0.586066 | DOWN | 368.3523 | 368.3517 |
| 8770 | M492T26_ | 1.160921 | -0.21527 | -0.2641  | 0.799818 | 0.586109 | DOWN | 492.3085 | 492.3076 |
| 8771 | M378T28_ | 1.165824 | 0.221349 | 0.262809 | 0.799867 | 0.58612  | UP   | 378.3158 | 378.3155 |
| 8772 | M654T41_ | 1.123625 | -0.16816 | -0.26199 | 0.799985 | 0.586148 | DOWN | 654.3322 | 654.3308 |
| 8773 | M400T27  | 1.15878  | 0.212606 | 0.262813 | 0.80014  | 0.586186 | UP   | 400.3616 | 400.3609 |
| 8774 | M472T9_2 | 1.192797 | 0.254348 | 0.261927 | 0.800487 | 0.586269 | UP   | 472.3317 | 472.3303 |
| 8775 | M340T32_ | 1.175193 | 0.232898 | 0.261277 | 0.800565 | 0.586288 | UP   | 340.2846 | 340.2842 |
| 8776 | M415T18_ | 1.111872 | -0.15299 | -0.26182 | 0.80061  | 0.586298 | DOWN | 414.9906 | 414.9905 |
| 8777 | M714T32  | 1.223595 | 0.291126 | 0.26619  | 0.800612 | 0.586299 | UP   | 714.1747 | 714.1745 |
| 8778 | M928T10  | 1.217134 | 0.283488 | 0.262106 | 0.800744 | 0.58633  | UP   | 927.6644 | 927.6602 |
| 8779 | M562T34  | 1.128914 | 0.174936 | 0.261195 | 0.800814 | 0.586347 | UP   | 562.3724 | 562.3713 |
| 8780 | M426T9_2 | 1.161913 | -0.2165  | -0.26074 | 0.801274 | 0.586457 | DOWN | 426.2763 | 426.2762 |
| 8781 | M182T9   | 1.124395 | -0.16915 | -0.26059 | 0.801294 | 0.586462 | DOWN | 182.1537 | 182.1535 |
| 8782 | M517T37_ | 1.141582 | 0.191035 | 0.260199 | 0.801623 | 0.586541 | UP   | 517.316  | 517.3153 |
| 8783 | M451T15  | 1.288251 | 0.365414 | 0.26185  | 0.801726 | 0.586565 | UP   | 450.9777 | 450.9776 |
| 8784 | M450T32  | 1.220244 | 0.287169 | 0.261755 | 0.801752 | 0.586571 | UP   | 450.0555 | 450.0551 |
| 8785 | M278T21  | 1.171842 | 0.228778 | 0.260295 | 0.801938 | 0.586616 | UP   | 278.1213 | 278.1211 |
| 8786 | M417T22_ | 1.183041 | 0.242501 | 0.260497 | 0.801958 | 0.586621 | UP   | 417.2186 | 417.2177 |
| 8787 | M481T9_2 | 1.18498  | -0.24486 | -0.25981 | 0.802    | 0.586631 | DOWN | 481.2613 | 481.2606 |
| 8788 | M403T22  | 1.214198 | 0.280004 | 0.26204  | 0.802099 | 0.586654 | UP   | 403.2959 | 403.2953 |

|      |          |          |          |          |          |          |      |          |          |
|------|----------|----------|----------|----------|----------|----------|------|----------|----------|
| 8789 | M647T30_ | 1.166212 | 0.22183  | 0.259723 | 0.80247  | 0.586743 | UP   | 647.1749 | 647.1737 |
| 8790 | M811T23  | 1.227855 | -0.29614 | -0.26028 | 0.802551 | 0.586762 | DOWN | 811.0761 | 811.0755 |
| 8791 | M351T22_ | 1.171461 | 0.228309 | 0.259032 | 0.802792 | 0.58682  | UP   | 351.2747 | 351.2745 |
| 8792 | M571T29_ | 1.192974 | 0.254562 | 0.258395 | 0.802914 | 0.586849 | UP   | 571.2996 | 571.2988 |
| 8793 | M273T9   | 1.241361 | -0.31192 | -0.26218 | 0.802936 | 0.586854 | DOWN | 273.1676 | 273.1671 |
| 8794 | M416T19_ | 1.199679 | -0.26265 | -0.26122 | 0.802999 | 0.586869 | DOWN | 416.2965 | 416.2955 |
| 8795 | M418T21_ | 1.194612 | 0.256542 | 0.258343 | 0.803007 | 0.586871 | UP   | 418.1398 | 418.1394 |
| 8796 | M522T32_ | 1.152151 | -0.20433 | -0.25892 | 0.80321  | 0.58692  | DOWN | 522.3556 | 522.3546 |
| 8797 | M416T23  | 1.108744 | 0.148926 | 0.259333 | 0.803596 | 0.587011 | UP   | 416.2151 | 416.2142 |
| 8798 | M385T40  | 1.153831 | -0.20643 | -0.25778 | 0.803702 | 0.587037 | DOWN | 385.2923 | 385.2921 |
| 8799 | M233T30  | 1.118425 | -0.16147 | -0.25984 | 0.804215 | 0.587159 | DOWN | 233.2264 | 233.2261 |
| 8800 | M570T32_ | 1.165849 | -0.22138 | -0.25641 | 0.804712 | 0.587277 | DOWN | 570.3554 | 570.3553 |
| 8801 | M455T9_2 | 1.147054 | -0.19793 | -0.25574 | 0.804728 | 0.587281 | DOWN | 455.3496 | 455.3477 |
| 8802 | M321T11  | 1.268062 | -0.34263 | -0.25963 | 0.804832 | 0.587306 | DOWN | 321.1722 | 321.1719 |
| 8803 | M674T27  | 1.163583 | 0.218574 | 0.256244 | 0.805153 | 0.587382 | UP   | 674.4694 | 674.4682 |
| 8804 | M410T29_ | 1.179433 | 0.238093 | 0.255655 | 0.805183 | 0.587389 | UP   | 410.3109 | 410.3107 |
| 8805 | M354T16  | 1.113248 | 0.154775 | 0.25487  | 0.805253 | 0.587406 | UP   | 354.1491 | 354.1487 |
| 8806 | M326T31_ | 1.158696 | 0.212502 | 0.255093 | 0.805258 | 0.587407 | UP   | 326.3248 | 326.3244 |
| 8807 | M420T28_ | 1.154914 | 0.207785 | 0.255689 | 0.80532  | 0.587422 | UP   | 420.3666 | 420.3657 |
| 8808 | M409T11_ | 1.271701 | -0.34676 | -0.25607 | 0.805554 | 0.587477 | DOWN | 409.2008 | 409.2002 |
| 8809 | M207T11  | 1.221681 | 0.288867 | 0.254601 | 0.805645 | 0.587499 | UP   | 207.0318 | 207.0315 |
| 8810 | M570T28_ | 1.192578 | 0.254084 | 0.254767 | 0.80571  | 0.587514 | UP   | 570.3793 | 570.3783 |
| 8811 | M308T23_ | 1.15052  | 0.202286 | 0.255444 | 0.805875 | 0.587554 | UP   | 308.2971 | 308.2966 |
| 8812 | M191T17  | 1.140251 | -0.18935 | -0.25857 | 0.805918 | 0.587564 | DOWN | 191.1067 | 191.1064 |
| 8813 | M303T28_ | 1.130666 | -0.17717 | -0.25481 | 0.805974 | 0.587577 | DOWN | 302.7653 | 302.7651 |
| 8814 | M427T22_ | 1.089794 | -0.12406 | -0.25477 | 0.806019 | 0.587588 | DOWN | 427.0072 | 427.007  |
| 8815 | M469T10  | 1.17812  | 0.236487 | 0.254332 | 0.806146 | 0.587618 | UP   | 469.3277 | 469.3259 |
| 8816 | M476T10  | 1.247152 | -0.31864 | -0.25757 | 0.806158 | 0.587621 | DOWN | 475.8274 | 475.826  |
| 8817 | M288T25  | 1.180415 | -0.23929 | -0.256   | 0.806233 | 0.587638 | DOWN | 288.2808 | 288.2806 |
| 8818 | M743T26  | 1.386897 | -0.47186 | -0.25849 | 0.806306 | 0.587656 | DOWN | 743.2215 | 743.2205 |
| 8819 | M718T27  | 1.166612 | 0.222325 | 0.254393 | 0.806341 | 0.587664 | UP   | 718.4958 | 718.4937 |
| 8820 | M456T34  | 1.206416 | 0.270727 | 0.253118 | 0.806575 | 0.587719 | UP   | 455.8283 | 455.8278 |
| 8821 | M949T44  | 1.03571  | -0.05062 | -0.2537  | 0.806595 | 0.587724 | DOWN | 948.5906 | 948.5887 |
| 8822 | M408T23  | 1.155985 | 0.209122 | 0.253818 | 0.806597 | 0.587725 | UP   | 408.1356 | 408.1353 |
| 8823 | M233T10_ | 1.309618 | -0.38915 | -0.25566 | 0.806606 | 0.587727 | DOWN | 233.0786 | 233.0783 |
| 8824 | M289T9   | 1.264486 | 0.338551 | 0.253382 | 0.806817 | 0.587777 | UP   | 288.6883 | 288.6875 |
| 8825 | M583T42_ | 1.042105 | 0.0595   | 0.254397 | 0.806931 | 0.587804 | UP   | 583.0757 | 583.0746 |
| 8826 | M452T28  | 1.102168 | 0.140344 | 0.252704 | 0.807117 | 0.587848 | UP   | 452.3219 | 452.3212 |
| 8827 | M503T11_ | 1.209384 | 0.274272 | 0.256644 | 0.807183 | 0.587864 | UP   | 503.179  | 503.1718 |
| 8828 | M400T21_ | 1.143033 | 0.192867 | 0.253185 | 0.807199 | 0.587867 | UP   | 400.3539 | 400.3532 |
| 8829 | M193T9   | 1.189495 | 0.250349 | 0.2561   | 0.807549 | 0.587953 | UP   | 193.1384 | 193.1383 |
| 8830 | M537T31  | 1.271926 | -0.34701 | -0.25645 | 0.807573 | 0.587959 | DOWN | 537.0044 | 537.0043 |
| 8831 | M500T30_ | 1.153023 | 0.205421 | 0.251773 | 0.807612 | 0.587968 | UP   | 500.3709 | 500.3705 |
| 8832 | M341T11_ | 1.218245 | 0.284805 | 0.251939 | 0.80801  | 0.588082 | UP   | 340.6808 | 340.676  |
| 8833 | M284T20  | 1.161589 | -0.2161  | -0.25289 | 0.808033 | 0.588089 | DOWN | 284.0776 | 284.0767 |
| 8834 | M519T43_ | 1.056241 | 0.078939 | 0.254767 | 0.808053 | 0.588095 | UP   | 519.0322 | 519.0319 |
| 8835 | M519T27  | 1.130401 | 0.176834 | 0.251024 | 0.808152 | 0.588125 | UP   | 519.3275 | 519.3271 |

|      |          |          |          |          |          |          |      |          |          |
|------|----------|----------|----------|----------|----------|----------|------|----------|----------|
| 8836 | M709T31  | 1.093139 | -0.12848 | -0.25177 | 0.808289 | 0.588165 | DOWN | 709.1824 | 709.1809 |
| 8837 | M372T10_ | 1.163385 | -0.21833 | -0.25081 | 0.80838  | 0.588193 | DOWN | 371.7184 | 371.7172 |
| 8838 | M475T7   | 1.359648 | -0.44323 | -0.2511  | 0.808387 | 0.588195 | DOWN | 475.3247 | 475.3242 |
| 8839 | M452T27_ | 1.137364 | -0.18569 | -0.25167 | 0.808432 | 0.588208 | DOWN | 452.2774 | 452.2771 |
| 8840 | M526T28  | 1.192251 | -0.25369 | -0.25233 | 0.808474 | 0.588221 | DOWN | 526.293  | 526.2922 |
| 8841 | M494T27_ | 1.151395 | -0.20338 | -0.25261 | 0.808531 | 0.588238 | DOWN | 494.3243 | 494.3234 |
| 8842 | M473T20_ | 1.157257 | 0.210709 | 0.251813 | 0.808648 | 0.588273 | UP   | 473.3779 | 473.3775 |
| 8843 | M439T10_ | 1.210382 | -0.27546 | -0.25196 | 0.808738 | 0.5883   | DOWN | 439.2205 | 439.2198 |
| 8844 | M706T23  | 1.15676  | -0.21009 | -0.25209 | 0.80887  | 0.58834  | DOWN | 706.329  | 706.3282 |
| 8845 | M454T9_3 | 1.23495  | -0.30445 | -0.25252 | 0.808964 | 0.588368 | DOWN | 453.8658 | 453.8614 |
| 8846 | M214T23  | 1.133882 | 0.181271 | 0.251826 | 0.808969 | 0.588369 | UP   | 214.1803 | 214.1798 |
| 8847 | M491T28  | 1.160274 | 0.214465 | 0.253719 | 0.808994 | 0.588377 | UP   | 491.3416 | 491.3412 |
| 8848 | M227T13  | 1.164517 | -0.21973 | -0.25096 | 0.809064 | 0.588397 | DOWN | 227.1836 | 227.1832 |
| 8849 | M527T20_ | 1.175248 | 0.232966 | 0.250365 | 0.809067 | 0.588398 | UP   | 527.4174 | 527.4168 |
| 8850 | M673T32_ | 1.261379 | 0.335001 | 0.254479 | 0.809131 | 0.588418 | UP   | 673.1432 | 673.1426 |
| 8851 | M302T23  | 1.161019 | -0.21539 | -0.25099 | 0.809214 | 0.588442 | DOWN | 302.0683 | 302.0682 |
| 8852 | M776T32  | 1.207361 | 0.271857 | 0.249502 | 0.80929  | 0.588465 | UP   | 776.4541 | 776.4532 |
| 8853 | M301T9   | 1.216683 | -0.28295 | -0.25138 | 0.809306 | 0.58847  | DOWN | 300.7003 | 300.7    |
| 8854 | M214T10  | 1.145061 | 0.195425 | 0.249868 | 0.809365 | 0.588488 | UP   | 213.6798 | 213.6794 |
| 8855 | M285T18_ | 1.336111 | -0.41804 | -0.25095 | 0.809396 | 0.588497 | DOWN | 285.0662 | 285.0655 |
| 8856 | M412T21_ | 1.179102 | 0.237689 | 0.249924 | 0.809649 | 0.588573 | UP   | 412.1576 | 412.1565 |
| 8857 | M224T14  | 1.225777 | 0.293696 | 0.249248 | 0.809899 | 0.588647 | UP   | 224.0573 | 224.0572 |
| 8858 | M340T15_ | 1.241386 | 0.311951 | 0.249275 | 0.809996 | 0.588677 | UP   | 340.027  | 340.0266 |
| 8859 | M415T27  | 1.170482 | 0.227103 | 0.248904 | 0.810187 | 0.588734 | UP   | 415.1206 | 415.1202 |
| 8860 | M451T21  | 1.172477 | 0.22956  | 0.249672 | 0.810199 | 0.588737 | UP   | 451.189  | 451.188  |
| 8861 | M369T38_ | 1.100807 | 0.138561 | 0.24857  | 0.810243 | 0.58875  | UP   | 369.1846 | 369.1845 |
| 8862 | M204T10_ | 1.231912 | 0.300899 | 0.248269 | 0.810468 | 0.588817 | UP   | 203.6257 | 203.6254 |
| 8863 | M688T31_ | 1.160411 | 0.214636 | 0.252768 | 0.810615 | 0.588861 | UP   | 688.2107 | 688.2101 |
| 8864 | M348T16_ | 1.11602  | 0.158362 | 0.247315 | 0.810944 | 0.588959 | UP   | 348.1879 | 348.1876 |
| 8865 | M497T22  | 1.175623 | 0.233425 | 0.247428 | 0.810974 | 0.588969 | UP   | 497.1837 | 497.1832 |
| 8866 | M306T28_ | 1.160619 | 0.214895 | 0.247645 | 0.811212 | 0.58904  | UP   | 305.8465 | 305.8464 |
| 8867 | M426T35_ | 1.128836 | 0.174836 | 0.246874 | 0.81129  | 0.589063 | UP   | 426.3211 | 426.3202 |
| 8868 | M408T27  | 1.23082  | -0.29962 | -0.25095 | 0.811356 | 0.589083 | DOWN | 408.1235 | 408.1234 |
| 8869 | M299T11_ | 1.184897 | 0.244762 | 0.249332 | 0.81157  | 0.589146 | UP   | 299.1104 | 299.1102 |
| 8870 | M275T32_ | 1.168686 | 0.224887 | 0.247029 | 0.8116   | 0.589155 | UP   | 274.5215 | 274.5211 |
| 8871 | M498T27_ | 1.159407 | 0.213387 | 0.247377 | 0.811968 | 0.589265 | UP   | 498.3638 | 498.3631 |
| 8872 | M392T11  | 1.114089 | 0.155865 | 0.246051 | 0.812007 | 0.589277 | UP   | 392.2075 | 392.207  |
| 8873 | M478T9_5 | 1.191946 | -0.25332 | -0.24591 | 0.812033 | 0.589284 | DOWN | 478.3465 | 478.3454 |
| 8874 | M552T17  | 1.135547 | 0.183388 | 0.247142 | 0.81204  | 0.589286 | UP   | 552.4163 | 552.4162 |
| 8875 | M353T16_ | 1.171908 | -0.22886 | -0.24596 | 0.812179 | 0.589328 | DOWN | 353.1726 | 353.1719 |
| 8876 | M302T27  | 1.17371  | 0.231077 | 0.245572 | 0.812228 | 0.589342 | UP   | 302.1389 | 302.1388 |
| 8877 | M613T9   | 1.202335 | -0.26584 | -0.24875 | 0.812459 | 0.589411 | DOWN | 613.3415 | 613.3407 |
| 8878 | M464T10  | 1.252392 | -0.32469 | -0.24816 | 0.812464 | 0.589413 | DOWN | 464.3349 | 464.333  |
| 8879 | M525T9   | 1.174062 | -0.23151 | -0.24668 | 0.812492 | 0.589421 | DOWN | 525.288  | 525.2873 |
| 8880 | M270T26_ | 1.192513 | 0.254005 | 0.24856  | 0.812701 | 0.589484 | UP   | 270.1001 | 270.0995 |
| 8881 | M280T18_ | 1.152628 | 0.204926 | 0.245986 | 0.812771 | 0.589504 | UP   | 280.0984 | 280.0979 |
| 8882 | M474T34  | 1.127309 | -0.17288 | -0.24605 | 0.813114 | 0.589606 | DOWN | 474.2811 | 474.2803 |

|      |          |          |          |          |          |          |      |          |          |
|------|----------|----------|----------|----------|----------|----------|------|----------|----------|
| 8883 | M344T10  | 1.163095 | 0.217968 | 0.244249 | 0.81322  | 0.589638 | UP   | 344.3104 | 344.3095 |
| 8884 | M650T11_ | 1.250404 | 0.322395 | 0.247278 | 0.813919 | 0.589846 | UP   | 650.1008 | 650.1    |
| 8885 | M271T14  | 1.181453 | 0.240563 | 0.24558  | 0.81424  | 0.589941 | UP   | 271.0751 | 271.0749 |
| 8886 | M843T10  | 1.26365  | 0.337597 | 0.242923 | 0.814396 | 0.589987 | UP   | 842.534  | 842.534  |
| 8887 | M672T26  | 1.144852 | 0.195161 | 0.243804 | 0.814607 | 0.59005  | UP   | 672.2451 | 672.2434 |
| 8888 | M227T21_ | 1.123148 | -0.16755 | -0.24472 | 0.814664 | 0.590067 | DOWN | 227.2009 | 227.2005 |
| 8889 | M497T20_ | 1.170812 | -0.22751 | -0.24476 | 0.814832 | 0.590117 | DOWN | 497.4066 | 497.4061 |
| 8890 | M370T14_ | 1.259205 | 0.332513 | 0.245427 | 0.814982 | 0.590162 | UP   | 369.9878 | 369.9876 |
| 8891 | M368T25  | 1.192885 | -0.25446 | -0.24629 | 0.81501  | 0.59017  | DOWN | 368.2795 | 368.2791 |
| 8892 | M326T9   | 1.133097 | -0.18027 | -0.24153 | 0.815262 | 0.590245 | DOWN | 326.2805 | 326.2796 |
| 8893 | M385T33_ | 1.138841 | -0.18757 | -0.24131 | 0.8154   | 0.590286 | DOWN | 385.1531 | 385.1526 |
| 8894 | M672T28  | 1.145415 | 0.195871 | 0.242071 | 0.81543  | 0.590295 | UP   | 672.2447 | 672.2434 |
| 8895 | M292T9_1 | 1.201556 | 0.264904 | 0.243382 | 0.8158   | 0.590404 | UP   | 292.1922 | 292.1918 |
| 8896 | M593T11  | 1.253649 | 0.326134 | 0.242889 | 0.815891 | 0.590431 | UP   | 592.7978 | 592.7965 |
| 8897 | M750T20  | 1.196434 | 0.258741 | 0.242075 | 0.815907 | 0.590436 | UP   | 750.0977 | 750.097  |
| 8898 | M356T29  | 1.147071 | -0.19795 | -0.2407  | 0.816022 | 0.59047  | DOWN | 356.2277 | 356.2274 |
| 8899 | M203T28  | 1.137271 | 0.185576 | 0.241318 | 0.816076 | 0.590486 | UP   | 203.1067 | 203.1063 |
| 8900 | M454T21_ | 1.176117 | 0.234032 | 0.240595 | 0.816529 | 0.59062  | UP   | 454.1874 | 454.1863 |
| 8901 | M367T27  | 1.232695 | -0.30182 | -0.24403 | 0.816542 | 0.590624 | DOWN | 367.0971 | 367.0967 |
| 8902 | M559T29  | 1.179211 | 0.237822 | 0.23971  | 0.8168   | 0.5907   | UP   | 559.2997 | 559.2991 |
| 8903 | M432T23_ | 1.101216 | 0.139098 | 0.241088 | 0.81701  | 0.590762 | UP   | 432.2382 | 432.2372 |
| 8904 | M642T21  | 1.199447 | 0.262369 | 0.23881  | 0.817293 | 0.590846 | UP   | 642.4796 | 642.4789 |
| 8905 | M777T32  | 1.198311 | 0.261003 | 0.23875  | 0.817356 | 0.590865 | UP   | 777.4574 | 777.4567 |
| 8906 | M421T30_ | 1.158418 | -0.21216 | -0.23829 | 0.817807 | 0.590998 | DOWN | 421.2325 | 421.2318 |
| 8907 | M339T20  | 1.155868 | -0.20898 | -0.24163 | 0.817914 | 0.59103  | DOWN | 339.3011 | 339.3007 |
| 8908 | M381T30  | 1.142692 | -0.19244 | -0.23829 | 0.818131 | 0.591094 | DOWN | 381.3112 | 381.3106 |
| 8909 | M535T16  | 1.136062 | -0.18404 | -0.23804 | 0.818284 | 0.591139 | DOWN | 535.3381 | 535.3373 |
| 8910 | M412T24_ | 1.182158 | -0.24142 | -0.24076 | 0.818427 | 0.591181 | DOWN | 412.1427 | 412.1423 |
| 8911 | M930T10  | 1.203575 | 0.267326 | 0.237883 | 0.818701 | 0.591262 | UP   | 929.6709 | 929.6705 |
| 8912 | M366T26_ | 1.184149 | 0.243851 | 0.236878 | 0.818836 | 0.591302 | UP   | 366.2856 | 366.2851 |
| 8913 | M455T17_ | 1.238532 | 0.308631 | 0.239443 | 0.819166 | 0.591399 | UP   | 454.9344 | 454.9339 |
| 8914 | M449T22_ | 1.15624  | 0.209441 | 0.236385 | 0.819301 | 0.591439 | UP   | 449.0787 | 449.0776 |
| 8915 | M371T28  | 1.273783 | -0.34912 | -0.23588 | 0.819551 | 0.591513 | DOWN | 371.031  | 371.0308 |
| 8916 | M499T18_ | 1.136795 | 0.184972 | 0.236534 | 0.819884 | 0.591611 | UP   | 499.1505 | 499.1492 |
| 8917 | M416T24_ | 1.134112 | -0.18156 | -0.23705 | 0.820051 | 0.59166  | DOWN | 416.1886 | 416.1884 |
| 8918 | M747T11  | 1.191876 | 0.253234 | 0.235331 | 0.820052 | 0.591661 | UP   | 747.41   | 747.4078 |
| 8919 | M483T24  | 1.151317 | 0.203285 | 0.236679 | 0.820138 | 0.591686 | UP   | 483.351  | 483.3507 |
| 8920 | M510T33_ | 1.189809 | 0.25073  | 0.235706 | 0.820153 | 0.59169  | UP   | 510.4307 | 510.43   |
| 8921 | M483T18_ | 1.220667 | 0.28767  | 0.23563  | 0.820173 | 0.591696 | UP   | 483.1111 | 483.1107 |
| 8922 | M597T27_ | 1.15866  | 0.212457 | 0.236744 | 0.820284 | 0.591729 | UP   | 597.2472 | 597.2462 |
| 8923 | M408T21_ | 1.211782 | -0.27713 | -0.23697 | 0.820288 | 0.59173  | DOWN | 408.1322 | 408.1319 |
| 8924 | M565T18  | 1.204412 | 0.268329 | 0.235717 | 0.820295 | 0.591732 | UP   | 565.0133 | 565.0128 |
| 8925 | M433T20  | 1.138773 | -0.18748 | -0.23604 | 0.820327 | 0.591742 | DOWN | 433.3147 | 433.3139 |
| 8926 | M809T11  | 1.111679 | -0.15274 | -0.23507 | 0.820643 | 0.591835 | DOWN | 809.3812 | 809.3783 |
| 8927 | M286T30_ | 1.099874 | -0.13734 | -0.23394 | 0.820914 | 0.591915 | DOWN | 286.2378 | 286.2374 |
| 8928 | M377T30  | 1.299028 | -0.37743 | -0.23904 | 0.821017 | 0.591945 | DOWN | 377.0887 | 377.0885 |
| 8929 | M352T25  | 1.20008  | 0.263131 | 0.234587 | 0.821031 | 0.591949 | UP   | 352.2695 | 352.2689 |

|      |          |          |          |          |          |          |      |          |          |
|------|----------|----------|----------|----------|----------|----------|------|----------|----------|
| 8930 | M344T27_ | 1.158971 | -0.21284 | -0.23475 | 0.821151 | 0.591984 | DOWN | 344.105  | 344.1047 |
| 8931 | M397T44  | 1.114203 | 0.156012 | 0.240189 | 0.821266 | 0.592018 | UP   | 397.2158 | 397.2151 |
| 8932 | M473T9_3 | 1.153381 | 0.205869 | 0.233703 | 0.821566 | 0.592106 | UP   | 473.3248 | 473.3242 |
| 8933 | M319T29_ | 1.162032 | -0.21665 | -0.23629 | 0.82158  | 0.59211  | DOWN | 319.2268 | 319.2267 |
| 8934 | M251T14  | 1.207182 | -0.27164 | -0.23411 | 0.82173  | 0.592154 | DOWN | 251.1256 | 251.1254 |
| 8935 | M394T23_ | 1.204637 | -0.2686  | -0.23582 | 0.821925 | 0.592212 | DOWN | 393.8301 | 393.8297 |
| 8936 | M369T21  | 1.17559  | 0.233385 | 0.232276 | 0.822227 | 0.5923   | UP   | 369.1358 | 369.1355 |
| 8937 | M550T32_ | 1.187042 | 0.247371 | 0.233877 | 0.822409 | 0.592354 | UP   | 550.317  | 550.3141 |
| 8938 | M222T28_ | 1.135172 | 0.182911 | 0.232837 | 0.822425 | 0.592359 | UP   | 222.1207 | 222.1202 |
| 8939 | M249T27_ | 1.192733 | 0.254271 | 0.23183  | 0.822622 | 0.592416 | UP   | 249.1851 | 249.1849 |
| 8940 | M425T10_ | 1.304407 | -0.38339 | -0.23375 | 0.822937 | 0.592509 | DOWN | 425.3007 | 425.2995 |
| 8941 | M401T21_ | 1.142598 | 0.192318 | 0.231872 | 0.823073 | 0.592549 | UP   | 401.3377 | 401.3366 |
| 8942 | M248T28_ | 1.149392 | -0.20087 | -0.23405 | 0.823128 | 0.592565 | DOWN | 248.201  | 248.2007 |
| 8943 | M293T28_ | 1.160248 | 0.214434 | 0.231551 | 0.823155 | 0.592573 | UP   | 293.0388 | 293.0385 |
| 8944 | M542T22_ | 1.197622 | 0.260173 | 0.230944 | 0.823185 | 0.592582 | UP   | 542.0566 | 542.0563 |
| 8945 | M279T31_ | 1.242254 | -0.31296 | -0.2309  | 0.823196 | 0.592585 | DOWN | 279.1084 | 279.1036 |
| 8946 | M896T11  | 1.28727  | 0.364315 | 0.230865 | 0.823282 | 0.59261  | UP   | 896.4371 | 896.4354 |
| 8947 | M200T26  | 1.16438  | -0.21956 | -0.23313 | 0.823338 | 0.592626 | DOWN | 200.2009 | 200.2005 |
| 8948 | M414T20  | 1.135373 | -0.18317 | -0.23147 | 0.823703 | 0.592733 | DOWN | 414.3007 | 414.2995 |
| 8949 | M240T17  | 1.149352 | -0.20082 | -0.23402 | 0.823752 | 0.592748 | DOWN | 240.1208 | 240.1205 |
| 8950 | M520T28  | 1.131678 | -0.17846 | -0.23219 | 0.823765 | 0.592752 | DOWN | 520.3399 | 520.3389 |
| 8951 | M195T11_ | 1.142072 | 0.191653 | 0.232361 | 0.8241   | 0.59285  | UP   | 195.1381 | 195.1378 |
| 8952 | M585T30  | 1.10889  | -0.14912 | -0.2305  | 0.824179 | 0.592873 | DOWN | 585.4952 | 585.4943 |
| 8953 | M521T29  | 1.123526 | -0.16803 | -0.23107 | 0.824277 | 0.592902 | DOWN | 521.3435 | 521.3424 |
| 8954 | M351T30  | 1.123899 | -0.16851 | -0.23024 | 0.824436 | 0.592948 | DOWN | 351.0992 | 351.0988 |
| 8955 | M335T41_ | 1.086252 | -0.11936 | -0.22994 | 0.824457 | 0.592954 | DOWN | 335.1671 | 335.1668 |
| 8956 | M649T11  | 1.202416 | 0.265936 | 0.229539 | 0.824531 | 0.592976 | UP   | 649.4162 | 649.4148 |
| 8957 | M469T20  | 1.1431   | 0.192952 | 0.229463 | 0.824632 | 0.593006 | UP   | 469.3274 | 469.3265 |
| 8958 | M432T25_ | 1.146356 | 0.197055 | 0.229938 | 0.824636 | 0.593007 | UP   | 432.378  | 432.3769 |
| 8959 | M895T11  | 1.285623 | 0.362468 | 0.228973 | 0.824701 | 0.593026 | UP   | 895.4337 | 895.4307 |
| 8960 | M315T16  | 1.118214 | 0.161197 | 0.229491 | 0.824844 | 0.593068 | UP   | 315.1595 | 315.1592 |
| 8961 | M252T31  | 1.158292 | 0.211999 | 0.228792 | 0.825058 | 0.59313  | UP   | 252.1595 | 252.1592 |
| 8962 | M436T26  | 1.172506 | 0.229596 | 0.228133 | 0.825312 | 0.593205 | UP   | 436.2568 | 436.2548 |
| 8963 | M610T29_ | 1.154837 | -0.20769 | -0.22953 | 0.825726 | 0.593325 | DOWN | 610.4527 | 610.452  |
| 8964 | M647T30_ | 1.039775 | 0.056271 | 0.229198 | 0.825811 | 0.59335  | UP   | 647.4371 | 647.4358 |
| 8965 | M352T27  | 1.069471 | 0.096897 | 0.227556 | 0.826069 | 0.593426 | UP   | 352.2204 | 352.2202 |
| 8966 | M273T32_ | 1.189842 | -0.25077 | -0.23294 | 0.82623  | 0.593473 | DOWN | 273.115  | 273.1147 |
| 8967 | M407T21_ | 1.196766 | 0.259141 | 0.226778 | 0.8263   | 0.593493 | UP   | 407.1354 | 407.1349 |
| 8968 | M278T30_ | 1.141624 | 0.191088 | 0.226952 | 0.826335 | 0.593503 | UP   | 278.0669 | 278.0666 |
| 8969 | M586T29_ | 1.157719 | 0.211285 | 0.226589 | 0.826449 | 0.593537 | UP   | 586.4164 | 586.4156 |
| 8970 | M242T27  | 1.117608 | 0.160414 | 0.226837 | 0.826483 | 0.593547 | UP   | 242.2844 | 242.2839 |
| 8971 | M651T11_ | 1.200414 | 0.263532 | 0.226852 | 0.826561 | 0.593569 | UP   | 651.4229 | 651.4213 |
| 8972 | M316T23_ | 1.1408   | -0.19005 | -0.2281  | 0.826987 | 0.593694 | DOWN | 316.2849 | 316.2847 |
| 8973 | M229T16_ | 1.20587  | -0.27007 | -0.22576 | 0.827428 | 0.593822 | DOWN | 229.1994 | 229.1992 |
| 8974 | M389T11_ | 1.181416 | -0.24052 | -0.2257  | 0.827628 | 0.59388  | DOWN | 389.2517 | 389.2512 |
| 8975 | M593T22_ | 1.212619 | -0.27813 | -0.22955 | 0.827637 | 0.593883 | DOWN | 593.0446 | 593.0438 |
| 8976 | M423T40  | 1.133057 | -0.18022 | -0.22595 | 0.827765 | 0.59392  | DOWN | 423.2717 | 423.2709 |

|      |          |          |          |          |          |          |      |          |          |
|------|----------|----------|----------|----------|----------|----------|------|----------|----------|
| 8977 | M364T44  | 1.117578 | -0.16038 | -0.22804 | 0.827954 | 0.593975 | DOWN | 364.1832 | 364.1828 |
| 8978 | M744T34  | 1.193652 | -0.25538 | -0.22703 | 0.828293 | 0.594074 | DOWN | 743.5166 | 743.5151 |
| 8979 | M259T23_ | 1.128433 | 0.17432  | 0.225724 | 0.828446 | 0.594119 | UP   | 259.1654 | 259.165  |
| 8980 | M498T27_ | 1.160216 | -0.21439 | -0.22565 | 0.828548 | 0.594148 | DOWN | 498.1185 | 498.1179 |
| 8981 | M459T21  | 1.161688 | 0.216223 | 0.224203 | 0.828566 | 0.594154 | UP   | 459.1665 | 459.1658 |
| 8982 | M231T12  | 1.107085 | 0.146766 | 0.225098 | 0.82863  | 0.594172 | UP   | 231.1938 | 231.1936 |
| 8983 | M498T31_ | 1.116094 | 0.158459 | 0.224269 | 0.828699 | 0.594192 | UP   | 498.3788 | 498.378  |
| 8984 | M571T28  | 1.170294 | 0.226871 | 0.223955 | 0.828803 | 0.594223 | UP   | 571.3826 | 571.382  |
| 8985 | M433T23_ | 1.096225 | 0.132544 | 0.22495  | 0.828976 | 0.594273 | UP   | 433.2416 | 433.2406 |
| 8986 | M325T26_ | 1.097152 | 0.133764 | 0.223317 | 0.82898  | 0.594274 | UP   | 325.2013 | 325.2011 |
| 8987 | M570T9_2 | 1.134544 | -0.18211 | -0.22445 | 0.82939  | 0.594393 | DOWN | 570.3181 | 570.318  |
| 8988 | M384T22_ | 1.10795  | -0.14789 | -0.22789 | 0.829447 | 0.59441  | DOWN | 384.0425 | 384.0411 |
| 8989 | M650T20  | 1.176241 | 0.234183 | 0.22327  | 0.829498 | 0.594425 | UP   | 650.1723 | 650.171  |
| 8990 | M241T17  | 1.106957 | 0.1466   | 0.222815 | 0.829645 | 0.594467 | UP   | 241.18   | 241.1799 |
| 8991 | M533T18_ | 1.180736 | 0.239687 | 0.222692 | 0.829775 | 0.594505 | UP   | 533.2571 | 533.2568 |
| 8992 | M336T21_ | 1.0852   | 0.117961 | 0.222371 | 0.829834 | 0.594522 | UP   | 336.2451 | 336.2442 |
| 8993 | M371T12  | 1.144047 | -0.19415 | -0.22132 | 0.830405 | 0.594688 | DOWN | 371.2044 | 371.2042 |
| 8994 | M414T33_ | 1.062194 | -0.08705 | -0.22165 | 0.830533 | 0.594725 | DOWN | 414.1933 | 414.1931 |
| 8995 | M270T26_ | 1.153554 | 0.206086 | 0.221669 | 0.830678 | 0.594767 | UP   | 270.1491 | 270.1489 |
| 8996 | M520T29  | 1.116026 | -0.15837 | -0.22239 | 0.830772 | 0.594795 | DOWN | 520.3401 | 520.339  |
| 8997 | M348T24_ | 1.156457 | 0.209711 | 0.222236 | 0.830827 | 0.594811 | UP   | 348.3264 | 348.3256 |
| 8998 | M666T11  | 1.190414 | 0.251464 | 0.221061 | 0.830904 | 0.594833 | UP   | 666.3942 | 666.3926 |
| 8999 | M568T28_ | 1.131933 | -0.17879 | -0.22272 | 0.830962 | 0.59485  | DOWN | 568.3402 | 568.3395 |
| 9000 | M436T23  | 1.167117 | -0.22295 | -0.22394 | 0.831056 | 0.594877 | DOWN | 436.0042 | 436.0039 |
| 9001 | M350T9_3 | 1.169232 | 0.225562 | 0.222595 | 0.831335 | 0.594958 | UP   | 349.7666 | 349.7657 |
| 9002 | M455T17_ | 1.20414  | 0.268004 | 0.223361 | 0.83149  | 0.595003 | UP   | 455.0089 | 455.0087 |
| 9003 | M520T40  | 1.09855  | 0.1356   | 0.219472 | 0.831779 | 0.595087 | UP   | 520.3634 | 520.3622 |
| 9004 | M284T18  | 1.14578  | 0.196331 | 0.220531 | 0.831826 | 0.5951   | UP   | 284.0989 | 284.0986 |
| 9005 | M524T36  | 1.254584 | 0.327209 | 0.223858 | 0.832207 | 0.595211 | UP   | 524.3705 | 524.3702 |
| 9006 | M597T32_ | 1.142935 | 0.192743 | 0.220447 | 0.832226 | 0.595216 | UP   | 597.4212 | 597.4208 |
| 9007 | M223T28  | 1.059935 | 0.083975 | 0.220678 | 0.832276 | 0.595231 | UP   | 223.1237 | 223.1233 |
| 9008 | M349T14  | 1.216958 | 0.28328  | 0.221507 | 0.832307 | 0.595239 | UP   | 348.9671 | 348.9668 |
| 9009 | M293T28_ | 1.136485 | 0.184578 | 0.218907 | 0.832534 | 0.595305 | UP   | 292.7475 | 292.7472 |
| 9010 | M417T24  | 1.124134 | 0.168814 | 0.218437 | 0.832665 | 0.595343 | UP   | 417.1921 | 417.1916 |
| 9011 | M403T40  | 1.066123 | -0.09237 | -0.21852 | 0.832703 | 0.595354 | DOWN | 403.3052 | 403.3047 |
| 9012 | M801T22  | 1.204099 | 0.267955 | 0.219963 | 0.832985 | 0.595436 | UP   | 801.1005 | 801.0996 |
| 9013 | M745T22  | 1.215553 | -0.28161 | -0.22103 | 0.833297 | 0.595526 | DOWN | 745.1651 | 745.1648 |
| 9014 | M475T8   | 1.193161 | 0.254789 | 0.217315 | 0.833409 | 0.595558 | UP   | 474.6031 | 474.6014 |
| 9015 | M446T21_ | 1.122868 | 0.167189 | 0.217338 | 0.833429 | 0.595564 | UP   | 446.1451 | 446.1442 |
| 9016 | M571T30_ | 1.108166 | -0.14817 | -0.21801 | 0.833506 | 0.595586 | DOWN | 571.3589 | 571.3582 |
| 9017 | M241T11  | 1.110053 | 0.150629 | 0.217104 | 0.833579 | 0.595607 | UP   | 241.1779 | 241.1774 |
| 9018 | M391T16_ | 1.072465 | -0.10093 | -0.21965 | 0.833897 | 0.595699 | DOWN | 391.2958 | 391.295  |
| 9019 | M659T18_ | 1.204927 | 0.268946 | 0.217455 | 0.834051 | 0.595744 | UP   | 659.128  | 659.1269 |
| 9020 | M451T20_ | 1.125966 | -0.17116 | -0.21742 | 0.834395 | 0.595843 | DOWN | 451.3253 | 451.324  |
| 9021 | M283T18  | 1.137606 | 0.186001 | 0.21656  | 0.834721 | 0.595937 | UP   | 283.0956 | 283.0948 |
| 9022 | M385T18_ | 1.155072 | -0.20798 | -0.21699 | 0.834745 | 0.595944 | DOWN | 385.1874 | 385.1874 |
| 9023 | M620T44  | 1.072337 | 0.100758 | 0.21571  | 0.834764 | 0.59595  | UP   | 620.4236 | 620.4227 |



|      |          |          |          |          |          |          |      |          |          |
|------|----------|----------|----------|----------|----------|----------|------|----------|----------|
| 9024 | M258T19  | 1.127825 | -0.17354 | -0.21643 | 0.835332 | 0.596113 | DOWN | 258.0598 | 258.0592 |
| 9025 | M566T30  | 1.115577 | -0.15779 | -0.21569 | 0.835344 | 0.596117 | DOWN | 566.4227 | 566.422  |
| 9026 | M612T21  | 1.123054 | 0.167427 | 0.214596 | 0.835464 | 0.596151 | UP   | 612.319  | 612.317  |
| 9027 | M479T23_ | 1.170242 | 0.226807 | 0.21479  | 0.835517 | 0.596167 | UP   | 479.0267 | 479.0262 |
| 9028 | M306T35_ | 1.127087 | 0.172599 | 0.214871 | 0.835607 | 0.596193 | UP   | 306.2511 | 306.251  |
| 9029 | M299T26_ | 1.136917 | 0.185127 | 0.21478  | 0.835822 | 0.596254 | UP   | 299.1618 | 299.1614 |
| 9030 | M440T21  | 1.151526 | -0.20355 | -0.21413 | 0.83594  | 0.596288 | DOWN | 440.1526 | 440.1516 |
| 9031 | M586T27  | 1.133562 | 0.180863 | 0.215411 | 0.835996 | 0.596305 | UP   | 586.4166 | 586.4153 |
| 9032 | M416T32_ | 1.176711 | 0.23476  | 0.215618 | 0.836107 | 0.596336 | UP   | 416.1913 | 416.1912 |
| 9033 | M268T19  | 1.170743 | 0.227424 | 0.21389  | 0.836393 | 0.596419 | UP   | 267.9727 | 267.9726 |
| 9034 | M673T17  | 1.221467 | 0.288615 | 0.217133 | 0.836414 | 0.596425 | UP   | 672.8694 | 672.8691 |
| 9035 | M614T9   | 1.165877 | -0.22142 | -0.21604 | 0.836425 | 0.596428 | DOWN | 614.3451 | 614.344  |
| 9036 | M816T11_ | 1.136287 | 0.184328 | 0.214091 | 0.836427 | 0.596429 | UP   | 815.5931 | 815.5916 |
| 9037 | M398T29_ | 1.093162 | 0.128507 | 0.213856 | 0.83666  | 0.596496 | UP   | 398.3266 | 398.3262 |
| 9038 | M522T10  | 1.171152 | 0.227928 | 0.215685 | 0.836662 | 0.596496 | UP   | 522.4384 | 522.4366 |
| 9039 | M378T29_ | 1.047031 | 0.066305 | 0.212855 | 0.836829 | 0.596544 | UP   | 378.2279 | 378.2277 |
| 9040 | M823T11  | 1.214042 | 0.279819 | 0.214687 | 0.837103 | 0.596623 | UP   | 823.3591 | 823.3562 |
| 9041 | M306T38  | 1.122712 | 0.166987 | 0.212522 | 0.837341 | 0.596691 | UP   | 306.3005 | 306.3002 |
| 9042 | M281T23  | 1.085951 | 0.118958 | 0.213629 | 0.837404 | 0.596709 | UP   | 281.1385 | 281.1379 |
| 9043 | M295T22_ | 1.144669 | 0.194931 | 0.214335 | 0.837481 | 0.596732 | UP   | 295.1109 | 295.11   |
| 9044 | M208T13  | 1.167208 | 0.223062 | 0.212278 | 0.837611 | 0.596769 | UP   | 208.1697 | 208.1694 |
| 9045 | M716T26  | 1.177911 | 0.236231 | 0.211676 | 0.837667 | 0.596785 | UP   | 715.5403 | 715.5392 |
| 9046 | M457T23  | 1.128919 | 0.174941 | 0.212252 | 0.837945 | 0.596865 | UP   | 457.3638 | 457.363  |
| 9047 | M276T27  | 1.146592 | 0.197352 | 0.21326  | 0.837952 | 0.596867 | UP   | 275.6258 | 275.6254 |
| 9048 | M331T17_ | 1.07716  | -0.10723 | -0.21124 | 0.838077 | 0.596903 | DOWN | 331.0154 | 331.015  |
| 9049 | M651T20  | 1.175171 | 0.232871 | 0.211275 | 0.838115 | 0.596914 | UP   | 651.1755 | 651.1726 |
| 9050 | M209T18  | 1.093601 | 0.129086 | 0.212211 | 0.838263 | 0.596956 | UP   | 209.1537 | 209.1535 |
| 9051 | M254T34  | 1.140778 | -0.19002 | -0.21305 | 0.838335 | 0.596977 | DOWN | 254.2478 | 254.2472 |
| 9052 | M604T24  | 1.213145 | 0.278752 | 0.214202 | 0.838411 | 0.596999 | UP   | 604.149  | 604.1483 |
| 9053 | M550T25  | 1.177172 | -0.23533 | -0.21184 | 0.838537 | 0.597035 | DOWN | 550.3876 | 550.3871 |
| 9054 | M445T29  | 1.151199 | -0.20314 | -0.21181 | 0.838582 | 0.597048 | DOWN | 445.3136 | 445.3067 |
| 9055 | M261T9   | 1.164216 | -0.21936 | -0.21108 | 0.838772 | 0.597102 | DOWN | 260.6355 | 260.6311 |
| 9056 | M384T23_ | 1.122673 | 0.166937 | 0.211052 | 0.839062 | 0.597185 | UP   | 383.5929 | 383.5922 |
| 9057 | M456T21_ | 1.144768 | 0.195055 | 0.210801 | 0.839064 | 0.597186 | UP   | 456.1879 | 456.187  |
| 9058 | M582T26_ | 1.169107 | 0.225407 | 0.209636 | 0.839192 | 0.597223 | UP   | 582.4582 | 582.4574 |
| 9059 | M339T17_ | 1.134884 | 0.182545 | 0.209316 | 0.839691 | 0.597366 | UP   | 339.2009 | 339.2008 |
| 9060 | M504T20  | 1.140907 | 0.190181 | 0.210049 | 0.839947 | 0.597439 | UP   | 504.2412 | 504.2399 |
| 9061 | M451T9_5 | 1.17036  | -0.22695 | -0.20884 | 0.839963 | 0.597444 | DOWN | 451.3289 | 451.3257 |
| 9062 | M372T43  | 1.062181 | 0.087029 | 0.208652 | 0.840008 | 0.597456 | UP   | 372.1006 | 372.0999 |
| 9063 | M405T38  | 1.103569 | 0.142176 | 0.208768 | 0.840031 | 0.597463 | UP   | 405.2635 | 405.2634 |
| 9064 | M208T21  | 1.130886 | 0.177454 | 0.208873 | 0.840113 | 0.597486 | UP   | 208.0793 | 208.0789 |
| 9065 | M597T21  | 1.167648 | 0.223605 | 0.208947 | 0.840127 | 0.597491 | UP   | 597.1197 | 597.1186 |
| 9066 | M728T23  | 1.202794 | -0.26639 | -0.20923 | 0.840169 | 0.597502 | DOWN | 727.5264 | 727.5256 |
| 9067 | M315T17  | 1.146945 | 0.197797 | 0.209191 | 0.84022  | 0.597517 | UP   | 314.9801 | 314.9795 |
| 9068 | M696T27  | 1.16723  | -0.22309 | -0.20951 | 0.840491 | 0.597595 | DOWN | 695.5578 | 695.5561 |
| 9069 | M285T25  | 1.155557 | -0.20859 | -0.20994 | 0.840781 | 0.597678 | DOWN | 285.1852 | 285.1845 |
| 9070 | M284T27  | 1.118975 | -0.16218 | -0.20923 | 0.840782 | 0.597678 | DOWN | 284.295  | 284.2945 |

|      |          |          |          |          |          |          |      |          |          |
|------|----------|----------|----------|----------|----------|----------|------|----------|----------|
| 9071 | M296T20  | 1.114801 | 0.156787 | 0.208805 | 0.841045 | 0.597753 | UP   | 296.194  | 296.1935 |
| 9072 | M254T22  | 1.143947 | 0.194021 | 0.208942 | 0.841368 | 0.597846 | UP   | 254.0842 | 254.0834 |
| 9073 | M304T23  | 1.14208  | -0.19166 | -0.20981 | 0.841622 | 0.597918 | DOWN | 304.2849 | 304.2844 |
| 9074 | M336T30_ | 1.113453 | -0.15504 | -0.20618 | 0.841802 | 0.597969 | DOWN | 336.1287 | 336.1282 |
| 9075 | M409T10  | 1.142977 | -0.1928  | -0.20692 | 0.842093 | 0.598053 | DOWN | 409.2314 | 409.23   |
| 9076 | M688T26_ | 1.123411 | -0.16789 | -0.20783 | 0.84226  | 0.5981   | DOWN | 687.5424 | 687.5416 |
| 9077 | M569T9   | 1.155934 | -0.20906 | -0.20742 | 0.842625 | 0.598204 | DOWN | 569.3145 | 569.3135 |
| 9078 | M305T28_ | 1.105442 | 0.144624 | 0.20563  | 0.842805 | 0.598256 | UP   | 305.3034 | 305.3029 |
| 9079 | M630T27  | 1.127553 | 0.173195 | 0.205747 | 0.842999 | 0.598311 | UP   | 630.443  | 630.4419 |
| 9080 | M170T22  | 1.126939 | -0.17241 | -0.20586 | 0.843002 | 0.598312 | DOWN | 170.1541 | 170.1537 |
| 9081 | M464T28  | 1.178164 | 0.23654  | 0.205139 | 0.843123 | 0.598346 | UP   | 464.0455 | 464.0451 |
| 9082 | M232T10  | 1.13896  | -0.18772 | -0.204   | 0.843475 | 0.598447 | DOWN | 232.0926 | 232.0921 |
| 9083 | M657T9_3 | 1.160918 | 0.215266 | 0.206302 | 0.843479 | 0.598448 | UP   | 657.3674 | 657.3664 |
| 9084 | M191T22  | 1.109094 | -0.14938 | -0.20698 | 0.843481 | 0.598448 | DOWN | 191.1795 | 191.1795 |
| 9085 | M413T26_ | 1.081213 | -0.11265 | -0.2037  | 0.84368  | 0.598505 | DOWN | 413.1608 | 413.1604 |
| 9086 | M427T16_ | 1.162694 | 0.217471 | 0.203752 | 0.843701 | 0.598511 | UP   | 427.1785 | 427.1785 |
| 9087 | M687T21_ | 1.170474 | -0.22709 | -0.20459 | 0.843944 | 0.59858  | DOWN | 687.3359 | 687.3357 |
| 9088 | M470T26  | 1.106894 | -0.14652 | -0.20331 | 0.843989 | 0.598593 | DOWN | 470.3148 | 470.3142 |
| 9089 | M319T18  | 1.108536 | -0.14866 | -0.20323 | 0.844192 | 0.598651 | DOWN | 319.1906 | 319.1882 |
| 9090 | M910T29_ | 1.118814 | 0.16197  | 0.203742 | 0.844265 | 0.598672 | UP   | 910.4366 | 910.4354 |
| 9091 | M432T20_ | 1.11395  | -0.15568 | -0.20438 | 0.844297 | 0.598681 | DOWN | 432.3113 | 432.3102 |
| 9092 | M286T23  | 1.129236 | -0.17535 | -0.20454 | 0.844298 | 0.598681 | DOWN | 286.1077 | 286.107  |
| 9093 | M672T29_ | 1.191097 | 0.252291 | 0.204252 | 0.844374 | 0.598703 | UP   | 672.2266 | 672.2258 |
| 9094 | M317T27  | 1.121092 | -0.1649  | -0.20457 | 0.844402 | 0.598711 | DOWN | 317.2025 | 317.2022 |
| 9095 | M428T15  | 1.237565 | -0.3075  | -0.20508 | 0.844507 | 0.598741 | DOWN | 428.0093 | 428.009  |
| 9096 | M279T31_ | 1.155123 | -0.20805 | -0.20267 | 0.844515 | 0.598743 | DOWN | 279.2876 | 279.2831 |
| 9097 | M235T16  | 1.158783 | 0.212611 | 0.203878 | 0.844553 | 0.598754 | UP   | 235.0629 | 235.0626 |
| 9098 | M348T2   | 1.050728 | 0.071389 | 0.202563 | 0.844889 | 0.598849 | UP   | 347.8171 | 347.8168 |
| 9099 | M529T29_ | 1.138905 | -0.18765 | -0.20214 | 0.845221 | 0.598944 | DOWN | 529.3117 | 529.3109 |
| 9100 | M310T28_ | 1.149652 | 0.201197 | 0.202332 | 0.845246 | 0.598951 | UP   | 310.2869 | 310.2866 |
| 9101 | M321T26_ | 1.123865 | 0.168469 | 0.202464 | 0.845673 | 0.599072 | UP   | 321.0787 | 321.0787 |
| 9102 | M306T23_ | 1.172237 | -0.22926 | -0.20392 | 0.845717 | 0.599085 | DOWN | 306.2025 | 306.1966 |
| 9103 | M161T28  | 1.115041 | 0.157097 | 0.20158  | 0.845738 | 0.59909  | UP   | 161.0961 | 161.0958 |
| 9104 | M244T18  | 1.13149  | 0.178224 | 0.201291 | 0.846256 | 0.599237 | UP   | 244.0643 | 244.064  |
| 9105 | M369T10_ | 1.175484 | 0.233255 | 0.200821 | 0.846309 | 0.599252 | UP   | 368.8912 | 368.891  |
| 9106 | M363T31_ | 1.083861 | -0.11618 | -0.20046 | 0.846533 | 0.599316 | DOWN | 363.1115 | 363.1108 |
| 9107 | M168T30  | 1.111681 | 0.152743 | 0.200309 | 0.846663 | 0.599353 | UP   | 167.9936 | 167.9934 |
| 9108 | M713T31_ | 1.091773 | -0.12667 | -0.20044 | 0.846685 | 0.599359 | DOWN | 713.1801 | 713.1794 |
| 9109 | M462T29  | 1.11545  | 0.157625 | 0.200402 | 0.846932 | 0.599429 | UP   | 462.3772 | 462.3766 |
| 9110 | M329T18_ | 1.179711 | -0.23843 | -0.20124 | 0.847006 | 0.59945  | DOWN | 329.2303 | 329.2298 |
| 9111 | M302T22  | 1.118505 | -0.16157 | -0.20104 | 0.847089 | 0.599474 | DOWN | 302.1603 | 302.1599 |
| 9112 | M331T10_ | 1.202904 | 0.266521 | 0.199062 | 0.847185 | 0.599501 | UP   | 331.2098 | 331.2096 |
| 9113 | M268T22  | 1.142675 | 0.192415 | 0.200084 | 0.847216 | 0.59951  | UP   | 268.0998 | 268.0998 |
| 9114 | M415T20_ | 1.117693 | -0.16052 | -0.19953 | 0.847262 | 0.599523 | DOWN | 415.3042 | 415.3035 |
| 9115 | M512T42  | 1.037819 | -0.05355 | -0.20323 | 0.847283 | 0.599529 | DOWN | 512.2691 | 512.269  |
| 9116 | M231T22_ | 1.145392 | 0.195842 | 0.199918 | 0.847608 | 0.599621 | UP   | 231.0682 | 231.0675 |
| 9117 | M575T11  | 1.252555 | 0.324873 | 0.198433 | 0.847702 | 0.599647 | UP   | 575.2519 | 575.2512 |

|      |          |          |          |          |          |          |      |          |          |
|------|----------|----------|----------|----------|----------|----------|------|----------|----------|
| 9118 | M456T22  | 1.108027 | 0.147993 | 0.198728 | 0.847719 | 0.599652 | UP   | 456.3326 | 456.3316 |
| 9119 | M380T23_ | 1.15503  | 0.207931 | 0.199191 | 0.847835 | 0.599685 | UP   | 380.3008 | 380.2991 |
| 9120 | M619T22  | 1.12204  | 0.166124 | 0.198851 | 0.847899 | 0.599703 | UP   | 619.1721 | 619.1703 |
| 9121 | M399T9_1 | 1.157499 | -0.21101 | -0.1992  | 0.847955 | 0.599719 | DOWN | 398.8267 | 398.8262 |
| 9122 | M367T20  | 1.190026 | 0.250994 | 0.19879  | 0.848297 | 0.599816 | UP   | 367.1206 | 367.1203 |
| 9123 | M599T31  | 1.084285 | -0.11674 | -0.19748 | 0.848473 | 0.599866 | DOWN | 599.2681 | 599.2669 |
| 9124 | M504T21_ | 1.122008 | 0.166083 | 0.197357 | 0.848481 | 0.599868 | UP   | 504.1247 | 504.1243 |
| 9125 | M415T19_ | 1.14417  | -0.1943  | -0.19954 | 0.848498 | 0.599873 | DOWN | 415.2931 | 415.2923 |
| 9126 | M536T11  | 1.164456 | 0.219656 | 0.197976 | 0.848782 | 0.599953 | UP   | 536.3319 | 536.3309 |
| 9127 | M445T38  | 1.132126 | 0.179034 | 0.197287 | 0.848793 | 0.599956 | UP   | 445.2586 | 445.2575 |
| 9128 | M611T29_ | 1.117091 | -0.15975 | -0.19728 | 0.848889 | 0.599983 | DOWN | 611.2516 | 611.2509 |
| 9129 | M502T28  | 1.137673 | -0.18609 | -0.19684 | 0.849582 | 0.600179 | DOWN | 502.293  | 502.2921 |
| 9130 | M570T30_ | 1.094695 | -0.13053 | -0.19642 | 0.849734 | 0.600222 | DOWN | 570.3554 | 570.3547 |
| 9131 | M545T28_ | 1.114984 | -0.15702 | -0.19711 | 0.849884 | 0.600264 | DOWN | 545.3434 | 545.3426 |
| 9132 | M763T27  | 1.135588 | 0.183439 | 0.195963 | 0.849942 | 0.600281 | UP   | 762.5221 | 762.5211 |
| 9133 | M354T20  | 1.102914 | 0.141321 | 0.1968   | 0.850005 | 0.600298 | UP   | 354.222  | 354.2218 |
| 9134 | M326T28  | 1.119884 | 0.163349 | 0.195835 | 0.850065 | 0.600315 | UP   | 326.2329 | 326.2322 |
| 9135 | M508T30_ | 1.096093 | 0.13237  | 0.194987 | 0.850265 | 0.600372 | UP   | 508.3397 | 508.339  |
| 9136 | M414T14  | 1.147471 | 0.198458 | 0.195174 | 0.850584 | 0.600462 | UP   | 414.2808 | 414.2806 |
| 9137 | M313T23_ | 1.128526 | 0.17444  | 0.195757 | 0.850612 | 0.60047  | UP   | 312.7136 | 312.7133 |
| 9138 | M687T21_ | 1.167614 | -0.22356 | -0.19543 | 0.85067  | 0.600486 | DOWN | 687.3361 | 687.3357 |
| 9139 | M869T21  | 1.180122 | -0.23894 | -0.19502 | 0.850717 | 0.600499 | DOWN | 869.3147 | 869.3144 |
| 9140 | M254T19_ | 1.132722 | -0.17979 | -0.19572 | 0.850951 | 0.600566 | DOWN | 254.067  | 254.0665 |
| 9141 | M474T44  | 1.031166 | -0.04428 | -0.19547 | 0.85108  | 0.600602 | DOWN | 474.348  | 474.3477 |
| 9142 | M494T17_ | 1.125399 | 0.170437 | 0.194515 | 0.851195 | 0.600634 | UP   | 494.181  | 494.1808 |
| 9143 | M292T9_2 | 1.157476 | -0.21098 | -0.19504 | 0.851418 | 0.600697 | DOWN | 292.443  | 292.4426 |
| 9144 | M752T34  | 1.142364 | 0.192023 | 0.196956 | 0.851657 | 0.600764 | UP   | 751.6204 | 751.6188 |
| 9145 | M439T42  | 1.16773  | 0.223707 | 0.196644 | 0.851975 | 0.600854 | UP   | 439.3207 | 439.3204 |
| 9146 | M437T22_ | 1.138329 | -0.18692 | -0.19366 | 0.852114 | 0.600893 | DOWN | 437.1526 | 437.1522 |
| 9147 | M486T26_ | 1.144967 | 0.195306 | 0.19296  | 0.852707 | 0.60106  | UP   | 486.0512 | 486.0507 |
| 9148 | M562T44  | 1.037813 | -0.05355 | -0.19339 | 0.853116 | 0.601175 | DOWN | 562.4004 | 562.3996 |
| 9149 | M422T26  | 1.162179 | -0.21683 | -0.19386 | 0.853527 | 0.60129  | DOWN | 422.0244 | 422.0232 |
| 9150 | M228T32_ | 1.120556 | -0.16421 | -0.19252 | 0.853556 | 0.601298 | DOWN | 228.2323 | 228.2321 |
| 9151 | M681T9_1 | 1.157298 | -0.21076 | -0.19083 | 0.853653 | 0.601326 | DOWN | 681.0433 | 681.0344 |
| 9152 | M372T21  | 1.135792 | 0.183699 | 0.191094 | 0.853708 | 0.601341 | UP   | 372.1344 | 372.1336 |
| 9153 | M327T22_ | 1.119826 | 0.163275 | 0.190934 | 0.853746 | 0.601352 | UP   | 327.1258 | 327.1257 |
| 9154 | M357T22_ | 1.08233  | 0.11414  | 0.190231 | 0.854328 | 0.601515 | UP   | 357.1732 | 357.1727 |
| 9155 | M444T12  | 1.238663 | -0.30878 | -0.19419 | 0.854375 | 0.601528 | DOWN | 444.1472 | 444.1463 |
| 9156 | M225T23  | 1.093193 | -0.12855 | -0.19219 | 0.854452 | 0.60155  | DOWN | 225.2156 | 225.2154 |
| 9157 | M357T26  | 1.132321 | 0.179283 | 0.191989 | 0.85447  | 0.601555 | UP   | 357.031  | 357.0306 |
| 9158 | M407T30_ | 1.045759 | -0.06455 | -0.19364 | 0.854546 | 0.601576 | DOWN | 407.2877 | 407.287  |
| 9159 | M439T27  | 1.115345 | 0.15749  | 0.189987 | 0.854582 | 0.601586 | UP   | 439.3321 | 439.3312 |
| 9160 | M568T29_ | 1.102164 | -0.14034 | -0.18994 | 0.854896 | 0.601674 | DOWN | 568.34   | 568.3388 |
| 9161 | M620T32_ | 1.086556 | 0.119763 | 0.190366 | 0.85514  | 0.601743 | UP   | 620.2865 | 620.2859 |
| 9162 | M369T10_ | 1.148929 | 0.20029  | 0.191055 | 0.855141 | 0.601743 | UP   | 369.2383 | 369.2376 |
| 9163 | M544T28  | 1.10671  | -0.14628 | -0.19008 | 0.855149 | 0.601745 | DOWN | 544.3401 | 544.3391 |
| 9164 | M387T23_ | 1.109563 | 0.149991 | 0.189503 | 0.855191 | 0.601757 | UP   | 387.349  | 387.3452 |

|      |          |          |          |          |          |          |      |          |          |
|------|----------|----------|----------|----------|----------|----------|------|----------|----------|
| 9165 | M350T27_ | 1.150064 | 0.201715 | 0.190338 | 0.855445 | 0.601828 | UP   | 349.588  | 349.5875 |
| 9166 | M720T25  | 1.120135 | -0.16367 | -0.19    | 0.856056 | 0.601999 | DOWN | 720.3447 | 720.3433 |
| 9167 | M385T35_ | 1.079478 | -0.11033 | -0.18763 | 0.856193 | 0.602038 | DOWN | 385.1718 | 385.1717 |
| 9168 | M432T11_ | 1.186258 | 0.246418 | 0.189686 | 0.856194 | 0.602038 | UP   | 431.7054 | 431.7045 |
| 9169 | M428T14_ | 1.180973 | 0.239976 | 0.189131 | 0.856475 | 0.602117 | UP   | 428.152  | 428.1516 |
| 9170 | M278T28_ | 1.087375 | -0.12085 | -0.1866  | 0.856825 | 0.602215 | DOWN | 278.1834 | 278.1829 |
| 9171 | M278T22  | 1.117217 | 0.15991  | 0.187286 | 0.856868 | 0.602226 | UP   | 278.0688 | 278.0683 |
| 9172 | M326T26  | 1.142438 | -0.19212 | -0.18949 | 0.856889 | 0.602232 | DOWN | 326.2329 | 326.2326 |
| 9173 | M240T4   | 1.106317 | -0.14577 | -0.18717 | 0.856929 | 0.602244 | DOWN | 240.1095 | 240.1092 |
| 9174 | M295T26_ | 1.05145  | -0.07238 | -0.18563 | 0.857385 | 0.602371 | DOWN | 295.0605 | 295.0601 |
| 9175 | M359T9_8 | 1.116212 | -0.15861 | -0.18596 | 0.857443 | 0.602387 | DOWN | 359.4827 | 359.482  |
| 9176 | M242T18_ | 1.125732 | 0.170863 | 0.185802 | 0.857745 | 0.602472 | UP   | 242.0689 | 242.0683 |
| 9177 | M271T15  | 1.156537 | 0.209812 | 0.185466 | 0.857817 | 0.602492 | UP   | 271.1882 | 271.1874 |
| 9178 | M461T24_ | 1.105419 | 0.144593 | 0.185582 | 0.857957 | 0.602531 | UP   | 461.2944 | 461.2936 |
| 9179 | M486T9_3 | 1.132248 | 0.17919  | 0.185871 | 0.857977 | 0.602536 | UP   | 486.3726 | 486.3713 |
| 9180 | M236T30_ | 1.112503 | 0.153809 | 0.184999 | 0.858039 | 0.602554 | UP   | 236.0563 | 236.056  |
| 9181 | M394T29  | 1.1051   | 0.144176 | 0.186057 | 0.858056 | 0.602558 | UP   | 394.2954 | 394.2952 |
| 9182 | M570T11  | 1.14163  | 0.191095 | 0.185803 | 0.858207 | 0.602601 | UP   | 570.4103 | 570.409  |
| 9183 | M509T10_ | 1.137375 | -0.18571 | -0.18477 | 0.858277 | 0.60262  | DOWN | 509.1835 | 509.1823 |
| 9184 | M319T20_ | 1.16005  | -0.21419 | -0.18693 | 0.858723 | 0.602744 | DOWN | 319.2828 | 319.2826 |
| 9185 | M526T22_ | 1.159579 | -0.2136  | -0.18608 | 0.859286 | 0.602901 | DOWN | 526.1558 | 526.1556 |
| 9186 | M469T14  | 1.17438  | 0.231899 | 0.184886 | 0.859324 | 0.602912 | UP   | 469.1786 | 469.1783 |
| 9187 | M195T20  | 1.061232 | 0.085741 | 0.187331 | 0.859417 | 0.602938 | UP   | 195.138  | 195.1379 |
| 9188 | M699T35  | 1.132694 | 0.179758 | 0.183722 | 0.859583 | 0.602984 | UP   | 699.4899 | 699.4892 |
| 9189 | M538T26_ | 1.175088 | 0.232769 | 0.184456 | 0.860022 | 0.603106 | UP   | 538.1761 | 538.1756 |
| 9190 | M311T37_ | 1.081144 | 0.112559 | 0.182404 | 0.860175 | 0.603149 | UP   | 311.2947 | 311.294  |
| 9191 | M286T24  | 1.114686 | -0.15664 | -0.18354 | 0.860722 | 0.603301 | DOWN | 286.2744 | 286.274  |
| 9192 | M248T28_ | 1.109646 | -0.1501  | -0.18279 | 0.860819 | 0.603328 | DOWN | 248.2302 | 248.2297 |
| 9193 | M398T9   | 1.139026 | -0.1878  | -0.1822  | 0.861036 | 0.603388 | DOWN | 398.325  | 398.3245 |
| 9194 | M286T26  | 1.160788 | 0.215105 | 0.183847 | 0.861079 | 0.6034   | UP   | 286.1103 | 286.1101 |
| 9195 | M390T37_ | 1.109048 | -0.14932 | -0.18147 | 0.861129 | 0.603414 | DOWN | 390.2852 | 390.2848 |
| 9196 | M547T31  | 1.087947 | -0.12161 | -0.18117 | 0.861135 | 0.603416 | DOWN | 547.3588 | 547.3579 |
| 9197 | M412T23_ | 1.105283 | -0.14442 | -0.18088 | 0.861201 | 0.603434 | DOWN | 412.2847 | 412.2844 |
| 9198 | M406T27_ | 1.116478 | -0.15896 | -0.18245 | 0.861336 | 0.603472 | DOWN | 406.1287 | 406.1282 |
| 9199 | M312T20  | 1.108581 | -0.14871 | -0.18055 | 0.861351 | 0.603476 | DOWN | 312.1808 | 312.1802 |
| 9200 | M401T10_ | 1.170787 | 0.227479 | 0.180736 | 0.861392 | 0.603487 | UP   | 401.3229 | 401.3221 |
| 9201 | M637T41  | 1.086598 | -0.11982 | -0.18029 | 0.861434 | 0.603499 | DOWN | 637.3055 | 637.3041 |
| 9202 | M572T17_ | 1.199953 | 0.262978 | 0.180736 | 0.861474 | 0.60351  | UP   | 572.0361 | 572.0355 |
| 9203 | M536T20  | 1.193732 | 0.255479 | 0.181785 | 0.861514 | 0.603521 | UP   | 536.0669 | 536.0663 |
| 9204 | M401T12  | 1.129255 | -0.17537 | -0.18035 | 0.861522 | 0.603523 | DOWN | 401.2508 | 401.2506 |
| 9205 | M219T24  | 1.117771 | 0.160625 | 0.183728 | 0.861669 | 0.603564 | UP   | 219.1745 | 219.1742 |
| 9206 | M929T10  | 1.164466 | 0.219668 | 0.181137 | 0.861857 | 0.603616 | UP   | 928.6673 | 928.664  |
| 9207 | M432T22_ | 1.085572 | -0.11846 | -0.17896 | 0.862424 | 0.603774 | DOWN | 432.1839 | 432.1837 |
| 9208 | M524T31_ | 1.132321 | 0.179283 | 0.178667 | 0.862675 | 0.603843 | UP   | 523.8009 | 523.7996 |
| 9209 | M279T31_ | 1.129217 | 0.175322 | 0.178437 | 0.862819 | 0.603883 | UP   | 279.0343 | 279.027  |
| 9210 | M443T30_ | 1.035552 | 0.050399 | 0.179074 | 0.862851 | 0.603892 | UP   | 442.8003 | 442.7999 |
| 9211 | M680T18  | 1.078993 | -0.10969 | -0.17956 | 0.862903 | 0.603907 | DOWN | 679.513  | 679.511  |

|      |          |          |          |          |          |          |      |          |          |
|------|----------|----------|----------|----------|----------|----------|------|----------|----------|
| 9212 | M567T22  | 1.176322 | -0.23428 | -0.18071 | 0.862947 | 0.603919 | DOWN | 567.1827 | 567.1824 |
| 9213 | M379T31_ | 1.185747 | -0.2458  | -0.18348 | 0.86297  | 0.603925 | DOWN | 379.1399 | 379.1396 |
| 9214 | M638T41  | 1.089667 | -0.12389 | -0.17823 | 0.863003 | 0.603934 | DOWN | 638.3093 | 638.3081 |
| 9215 | M726T43  | 1.039204 | -0.05548 | -0.18156 | 0.863016 | 0.603938 | DOWN | 726.0088 | 726.0084 |
| 9216 | M278T9   | 1.105318 | 0.144462 | 0.178504 | 0.86336  | 0.604033 | UP   | 278.1855 | 278.1853 |
| 9217 | M228T21  | 1.088907 | -0.12288 | -0.17793 | 0.864041 | 0.604222 | DOWN | 228.1597 | 228.1594 |
| 9218 | M431T11_ | 1.11728  | 0.159991 | 0.177018 | 0.864327 | 0.604301 | UP   | 431.2882 | 431.2875 |
| 9219 | M346T30  | 1.041864 | -0.05917 | -0.17654 | 0.865334 | 0.604579 | DOWN | 346.2096 | 346.2095 |
| 9220 | M401T10_ | 1.097781 | -0.13459 | -0.17783 | 0.865393 | 0.604596 | DOWN | 400.9765 | 400.9696 |
| 9221 | M280T9   | 1.11705  | -0.15969 | -0.1767  | 0.865675 | 0.604673 | DOWN | 280.1855 | 280.1854 |
| 9222 | M360T10_ | 1.118765 | -0.16191 | -0.17597 | 0.865824 | 0.604715 | DOWN | 360.2375 | 360.236  |
| 9223 | M846T23  | 1.122464 | 0.166669 | 0.175066 | 0.8662   | 0.604818 | UP   | 846.444  | 846.4421 |
| 9224 | M740T44  | 1.041627 | -0.05884 | -0.17384 | 0.866352 | 0.60486  | DOWN | 740.3603 | 740.36   |
| 9225 | M425T43  | 1.016575 | 0.023717 | 0.174525 | 0.866368 | 0.604865 | UP   | 425.1093 | 425.1087 |
| 9226 | M668T37  | 1.100969 | 0.138774 | 0.173939 | 0.866482 | 0.604896 | UP   | 667.5132 | 667.5118 |
| 9227 | M428T30  | 1.034558 | 0.049015 | 0.173587 | 0.866541 | 0.604912 | UP   | 428.3088 | 428.308  |
| 9228 | M364T31_ | 1.101887 | -0.13998 | -0.17467 | 0.866634 | 0.604938 | DOWN | 364.115  | 364.1145 |
| 9229 | M519T43_ | 1.034876 | 0.049458 | 0.174803 | 0.866649 | 0.604942 | UP   | 519.3665 | 519.3652 |
| 9230 | M385T26  | 1.128145 | 0.173953 | 0.173191 | 0.867098 | 0.605066 | UP   | 385.3509 | 385.3504 |
| 9231 | M351T25_ | 1.179964 | 0.238743 | 0.17441  | 0.867209 | 0.605097 | UP   | 351.053  | 351.0525 |
| 9232 | M747T24  | 1.113183 | 0.154691 | 0.174045 | 0.867233 | 0.605103 | UP   | 746.5275 | 746.5269 |
| 9233 | M437T26  | 1.131915 | 0.178766 | 0.172623 | 0.867237 | 0.605104 | UP   | 437.2604 | 437.2598 |
| 9234 | M507T30_ | 1.069248 | -0.0966  | -0.17389 | 0.867252 | 0.605109 | DOWN | 507.4631 | 507.4622 |
| 9235 | M468T40_ | 1.049228 | 0.069328 | 0.172862 | 0.867275 | 0.605115 | UP   | 468.441  | 468.4402 |
| 9236 | M287T18  | 1.07501  | -0.10435 | -0.17274 | 0.867542 | 0.605188 | DOWN | 287.0885 | 287.0884 |
| 9237 | M359T9_5 | 1.142846 | 0.192631 | 0.172039 | 0.867738 | 0.605242 | UP   | 359.2341 | 359.2326 |
| 9238 | M201T23  | 1.10591  | 0.145233 | 0.172682 | 0.867921 | 0.605293 | UP   | 201.1962 | 201.1959 |
| 9239 | M291T23_ | 1.127479 | 0.173101 | 0.173868 | 0.86798  | 0.605309 | UP   | 290.6086 | 290.6084 |
| 9240 | M860T27  | 1.117379 | 0.160118 | 0.172299 | 0.868043 | 0.605326 | UP   | 860.1109 | 860.1096 |
| 9241 | M245T18  | 1.098618 | 0.13569  | 0.172945 | 0.868126 | 0.605349 | UP   | 245.0473 | 245.0472 |
| 9242 | M465T9_2 | 1.10554  | 0.144751 | 0.171958 | 0.868233 | 0.605379 | UP   | 464.83   | 464.8289 |
| 9243 | M359T22_ | 1.115572 | 0.157783 | 0.171762 | 0.868252 | 0.605384 | UP   | 359.2407 | 359.2399 |
| 9244 | M366T10_ | 1.164749 | 0.22002  | 0.171528 | 0.868383 | 0.60542  | UP   | 365.5605 | 365.5602 |
| 9245 | M523T31_ | 1.12541  | 0.17045  | 0.171255 | 0.868391 | 0.605422 | UP   | 523.2992 | 523.298  |
| 9246 | M194T13  | 1.073596 | -0.10245 | -0.17122 | 0.868416 | 0.605429 | DOWN | 194.0094 | 194.0093 |
| 9247 | M249T22_ | 1.121187 | 0.165027 | 0.171878 | 0.868517 | 0.605457 | UP   | 249.0789 | 249.0782 |
| 9248 | M490T24  | 1.102443 | 0.140705 | 0.172005 | 0.868619 | 0.605485 | UP   | 490.3829 | 490.3721 |
| 9249 | M526T34  | 1.060678 | 0.084986 | 0.171747 | 0.868657 | 0.605495 | UP   | 526.4105 | 526.4097 |
| 9250 | M449T29_ | 1.088384 | 0.122187 | 0.170731 | 0.868793 | 0.605533 | UP   | 449.3269 | 449.3265 |
| 9251 | M414T19_ | 1.125332 | 0.170351 | 0.170623 | 0.868951 | 0.605576 | UP   | 414.052  | 414.0515 |
| 9252 | M245T22_ | 1.083985 | 0.116344 | 0.170438 | 0.868965 | 0.60558  | UP   | 245.1062 | 245.1055 |
| 9253 | M982T27  | 1.097317 | -0.13398 | -0.17129 | 0.869477 | 0.60572  | DOWN | 982.4505 | 982.4485 |
| 9254 | M323T28_ | 1.08597  | -0.11898 | -0.17081 | 0.869695 | 0.60578  | DOWN | 323.2219 | 323.2215 |
| 9255 | M508T10  | 1.12627  | -0.17155 | -0.17083 | 0.869827 | 0.605817 | DOWN | 508.3359 | 508.3342 |
| 9256 | M548T31_ | 1.109391 | 0.149767 | 0.168993 | 0.870084 | 0.605887 | UP   | 548.3072 | 548.3066 |
| 9257 | M544T9   | 1.198248 | 0.260927 | 0.168589 | 0.870342 | 0.605958 | UP   | 544.2433 | 544.2426 |
| 9258 | M689T37_ | 1.087913 | -0.12156 | -0.16949 | 0.8704   | 0.605974 | DOWN | 689.2817 | 689.281  |

|      |          |          |          |          |          |          |      |          |          |
|------|----------|----------|----------|----------|----------|----------|------|----------|----------|
| 9259 | M538T25  | 1.135348 | 0.183135 | 0.16847  | 0.870414 | 0.605978 | UP   | 538.4316 | 538.4302 |
| 9260 | M477T9_1 | 1.150787 | 0.202621 | 0.168548 | 0.870475 | 0.605994 | UP   | 477.3097 | 477.3043 |
| 9261 | M543T27_ | 1.090564 | -0.12507 | -0.16936 | 0.870542 | 0.606013 | DOWN | 543.3277 | 543.3268 |
| 9262 | M513T27_ | 1.162899 | -0.21773 | -0.16978 | 0.870875 | 0.606104 | DOWN | 513.0271 | 513.0271 |
| 9263 | M488T43  | 1.036178 | -0.05127 | -0.17171 | 0.870905 | 0.606112 | DOWN | 488.2694 | 488.2691 |
| 9264 | M574T11  | 1.205012 | 0.269048 | 0.167874 | 0.870932 | 0.60612  | UP   | 574.2483 | 574.2474 |
| 9265 | M772T29  | 1.123239 | 0.167665 | 0.168349 | 0.871111 | 0.606169 | UP   | 772.1865 | 772.1851 |
| 9266 | M447T21  | 1.100575 | 0.138258 | 0.167357 | 0.871381 | 0.606243 | UP   | 447.0631 | 447.0629 |
| 9267 | M579T31  | 1.094845 | -0.13073 | -0.16812 | 0.871702 | 0.606331 | DOWN | 579.2929 | 579.2919 |
| 9268 | M534T20  | 1.181607 | 0.24075  | 0.168102 | 0.871906 | 0.606387 | UP   | 534.0718 | 534.0715 |
| 9269 | M601T21  | 1.11991  | 0.163382 | 0.166988 | 0.872315 | 0.606499 | UP   | 601.1147 | 601.1141 |
| 9270 | M588T10  | 1.1558   | 0.208892 | 0.166085 | 0.872369 | 0.606513 | UP   | 588.4103 | 588.4097 |
| 9271 | M255T22_ | 1.11998  | 0.163473 | 0.167277 | 0.872528 | 0.606557 | UP   | 255.0875 | 255.0866 |
| 9272 | M419T21_ | 1.127018 | -0.17251 | -0.16658 | 0.872534 | 0.606558 | DOWN | 419.1366 | 419.136  |
| 9273 | M482T36  | 1.094716 | -0.13056 | -0.1664  | 0.872566 | 0.606567 | DOWN | 482.4052 | 482.4046 |
| 9274 | M359T11  | 1.100638 | -0.13834 | -0.16569 | 0.872577 | 0.60657  | DOWN | 359.2046 | 359.2043 |
| 9275 | M251T28  | 1.076835 | -0.1068  | -0.16708 | 0.872785 | 0.606627 | DOWN | 251.2006 | 251.2003 |
| 9276 | M295T20_ | 1.078446 | 0.108954 | 0.16528  | 0.873172 | 0.606733 | UP   | 295.1907 | 295.1901 |
| 9277 | M426T9_1 | 1.095912 | -0.13213 | -0.16505 | 0.873218 | 0.606745 | DOWN | 425.7747 | 425.7744 |
| 9278 | M753T34  | 1.118117 | 0.161071 | 0.167714 | 0.873283 | 0.606763 | UP   | 752.6226 | 752.6223 |
| 9279 | M501T26  | 1.110095 | -0.15068 | -0.16521 | 0.873357 | 0.606783 | DOWN | 501.2807 | 501.2796 |
| 9280 | M348T27  | 1.109641 | 0.150093 | 0.164734 | 0.873558 | 0.606838 | UP   | 348.2822 | 348.2815 |
| 9281 | M278T20  | 1.102855 | 0.141243 | 0.16433  | 0.873859 | 0.60692  | UP   | 278.0671 | 278.0668 |
| 9282 | M424T26  | 1.167992 | -0.22403 | -0.16641 | 0.87387  | 0.606923 | DOWN | 424.021  | 424.0193 |
| 9283 | M281T43  | 1.050919 | -0.07165 | -0.16366 | 0.87406  | 0.606975 | DOWN | 281.051  | 281.0505 |
| 9284 | M414T33_ | 1.061281 | 0.085807 | 0.166489 | 0.874307 | 0.607043 | UP   | 414.2958 | 414.2957 |
| 9285 | M582T20  | 1.119966 | -0.16346 | -0.16357 | 0.874354 | 0.607056 | DOWN | 582.2558 | 582.2554 |
| 9286 | M174T15  | 1.103408 | 0.141966 | 0.163316 | 0.874458 | 0.607084 | UP   | 174.1489 | 174.1489 |
| 9287 | M328T27_ | 1.101869 | 0.139953 | 0.163461 | 0.874756 | 0.607165 | UP   | 328.3002 | 328.2997 |
| 9288 | M364T17_ | 1.077873 | -0.10819 | -0.16527 | 0.874795 | 0.607176 | DOWN | 364.0249 | 364.0243 |
| 9289 | M396T19_ | 1.078    | -0.10836 | -0.1634  | 0.874829 | 0.607185 | DOWN | 396.0788 | 396.0783 |
| 9290 | M408T20_ | 1.065697 | 0.091797 | 0.163021 | 0.874843 | 0.607189 | UP   | 408.2285 | 408.2278 |
| 9291 | M658T19  | 1.135737 | 0.183629 | 0.162496 | 0.874946 | 0.607217 | UP   | 657.9068 | 657.9066 |
| 9292 | M238T19  | 1.096532 | 0.132948 | 0.162441 | 0.875432 | 0.60735  | UP   | 238.1884 | 238.1883 |
| 9293 | M334T33_ | 1.073883 | -0.10284 | -0.16193 | 0.875701 | 0.607423 | DOWN | 334.0967 | 334.0962 |
| 9294 | M523T31_ | 1.081199 | -0.11263 | -0.16178 | 0.875775 | 0.607443 | DOWN | 523.3588 | 523.3581 |
| 9295 | M346T22_ | 1.092083 | -0.12708 | -0.16283 | 0.875785 | 0.607446 | DOWN | 346.2532 | 346.2525 |
| 9296 | M800T23  | 1.128602 | -0.17454 | -0.16227 | 0.8761   | 0.607531 | DOWN | 799.5483 | 799.5477 |
| 9297 | M267T29  | 1.11407  | -0.15584 | -0.16227 | 0.876121 | 0.607537 | DOWN | 267.1745 | 267.1742 |
| 9298 | M583T29_ | 1.116296 | 0.15872  | 0.160787 | 0.876488 | 0.607637 | UP   | 583.2997 | 583.2987 |
| 9299 | M659T41_ | 1.073568 | -0.10241 | -0.1604  | 0.87655  | 0.607654 | DOWN | 659.2173 | 659.2157 |
| 9300 | M623T29_ | 1.140785 | 0.190027 | 0.16073  | 0.87717  | 0.607822 | UP   | 622.7615 | 622.7609 |
| 9301 | M326T17  | 1.092018 | 0.126997 | 0.16113  | 0.877222 | 0.607836 | UP   | 325.9882 | 325.9881 |
| 9302 | M648T19  | 1.099934 | 0.137417 | 0.160246 | 0.877232 | 0.607839 | UP   | 648.3958 | 648.3942 |
| 9303 | M408T44  | 1.018623 | 0.02662  | 0.15952  | 0.877434 | 0.607894 | UP   | 408.2229 | 408.2227 |
| 9304 | M366T29_ | 1.140858 | -0.19012 | -0.16068 | 0.877807 | 0.607995 | DOWN | 365.5928 | 365.5926 |
| 9305 | M250T7   | 1.201102 | -0.26436 | -0.1586  | 0.877921 | 0.608026 | DOWN | 250.1609 | 250.1608 |

|      |          |          |          |          |          |          |      |          |          |
|------|----------|----------|----------|----------|----------|----------|------|----------|----------|
| 9306 | M566T26  | 1.10613  | 0.145521 | 0.157788 | 0.878727 | 0.608245 | UP   | 566.2383 | 566.238  |
| 9307 | M576T31  | 1.160074 | 0.214217 | 0.159265 | 0.878891 | 0.60829  | UP   | 575.7689 | 575.7686 |
| 9308 | M380T30_ | 1.184137 | -0.24384 | -0.16023 | 0.878929 | 0.6083   | DOWN | 380.0874 | 380.0869 |
| 9309 | M502T20_ | 1.123977 | -0.16861 | -0.15821 | 0.878929 | 0.6083   | DOWN | 502.246  | 502.2456 |
| 9310 | M313T26_ | 1.083409 | -0.11558 | -0.15804 | 0.87917  | 0.608365 | DOWN | 313.1222 | 313.1217 |
| 9311 | M467T20  | 1.09546  | -0.13154 | -0.157   | 0.879218 | 0.608378 | DOWN | 467.3484 | 467.3473 |
| 9312 | M447T40  | 1.07089  | 0.098811 | 0.157031 | 0.87932  | 0.608406 | UP   | 447.2742 | 447.2729 |
| 9313 | M450T21  | 1.085672 | -0.11859 | -0.15706 | 0.879381 | 0.608422 | DOWN | 450.3219 | 450.3213 |
| 9314 | M301T23_ | 1.100152 | -0.1377  | -0.15673 | 0.879527 | 0.608462 | DOWN | 301.0759 | 301.0751 |
| 9315 | M368T22_ | 1.103695 | 0.142341 | 0.156582 | 0.879576 | 0.608475 | UP   | 368.3011 | 368.3008 |
| 9316 | M386T25  | 1.107667 | -0.14752 | -0.15823 | 0.879582 | 0.608477 | DOWN | 386.3418 | 386.3416 |
| 9317 | M203T20  | 1.079102 | 0.109831 | 0.157592 | 0.879727 | 0.608516 | UP   | 203.1067 | 203.1063 |
| 9318 | M469T40  | 1.048283 | 0.068029 | 0.156361 | 0.879828 | 0.608543 | UP   | 469.4444 | 469.4435 |
| 9319 | M347T35  | 1.097991 | 0.134866 | 0.156879 | 0.879872 | 0.608555 | UP   | 347.1773 | 347.1767 |
| 9320 | M440T26  | 1.149832 | -0.20142 | -0.15812 | 0.880233 | 0.608653 | DOWN | 440.2461 | 440.2408 |
| 9321 | M311T28  | 1.069157 | -0.09647 | -0.1568  | 0.880331 | 0.60868  | DOWN | 311.1645 | 311.1638 |
| 9322 | M240T21  | 1.087767 | -0.12137 | -0.15657 | 0.880491 | 0.608723 | DOWN | 240.1959 | 240.1955 |
| 9323 | M667T35  | 1.134647 | -0.18224 | -0.15633 | 0.881018 | 0.608865 | DOWN | 667.4569 | 667.4562 |
| 9324 | M465T10  | 1.153269 | -0.20573 | -0.15617 | 0.881034 | 0.60887  | DOWN | 464.8364 | 464.8343 |
| 9325 | M286T25_ | 1.086867 | 0.120175 | 0.155738 | 0.881531 | 0.609004 | UP   | 286.2742 | 286.2737 |
| 9326 | M652T11_ | 1.138888 | 0.187625 | 0.1539   | 0.881647 | 0.609035 | UP   | 652.4256 | 652.4254 |
| 9327 | M582T26_ | 1.164946 | 0.220263 | 0.155998 | 0.881675 | 0.609043 | UP   | 582.2018 | 582.2012 |
| 9328 | M484T29_ | 1.083113 | 0.115183 | 0.153387 | 0.882264 | 0.609202 | UP   | 484.3636 | 484.362  |
| 9329 | M518T27_ | 1.083287 | -0.11542 | -0.15376 | 0.882407 | 0.60924  | DOWN | 518.3244 | 518.3235 |
| 9330 | M402T25  | 1.091916 | -0.12686 | -0.15381 | 0.88242  | 0.609244 | DOWN | 402.3369 | 402.3364 |
| 9331 | M546T31  | 1.070855 | -0.09876 | -0.15308 | 0.882428 | 0.609246 | DOWN | 546.3555 | 546.3545 |
| 9332 | M398T30_ | 1.09316  | -0.12851 | -0.15341 | 0.882643 | 0.609304 | DOWN | 398.3054 | 398.3048 |
| 9333 | M526T9   | 1.103321 | -0.14185 | -0.15361 | 0.88269  | 0.609317 | DOWN | 526.2915 | 526.2912 |
| 9334 | M879T34  | 1.089849 | 0.124128 | 0.152362 | 0.882754 | 0.609334 | UP   | 878.6067 | 878.6047 |
| 9335 | M648T43_ | 1.026396 | 0.037587 | 0.154809 | 0.882797 | 0.609346 | UP   | 648.4454 | 648.4432 |
| 9336 | M482T24_ | 1.084787 | 0.117411 | 0.152942 | 0.882935 | 0.609383 | UP   | 482.3477 | 482.3466 |
| 9337 | M522T27  | 1.123844 | -0.16844 | -0.15269 | 0.88298  | 0.609395 | DOWN | 521.7858 | 521.7852 |
| 9338 | M393T19_ | 1.123    | 0.167357 | 0.152221 | 0.883016 | 0.609405 | UP   | 393.1325 | 393.1311 |
| 9339 | M328T9_1 | 1.130126 | 0.176483 | 0.151829 | 0.883278 | 0.609475 | UP   | 328.1998 | 328.1996 |
| 9340 | M595T20  | 1.163949 | 0.219028 | 0.15292  | 0.883321 | 0.609487 | UP   | 594.9655 | 594.9648 |
| 9341 | M296T22  | 1.105498 | 0.144697 | 0.15289  | 0.883582 | 0.609557 | UP   | 296.1142 | 296.1133 |
| 9342 | M422T38_ | 1.113995 | -0.15574 | -0.1503  | 0.884905 | 0.609913 | DOWN | 422.3478 | 422.3475 |
| 9343 | M290T27  | 1.118409 | -0.16145 | -0.14981 | 0.885036 | 0.609948 | DOWN | 290.2844 | 290.2842 |
| 9344 | M275T22  | 1.142806 | 0.192581 | 0.150823 | 0.885439 | 0.610057 | UP   | 274.5976 | 274.5973 |
| 9345 | M491T23  | 1.090881 | 0.125494 | 0.14863  | 0.886015 | 0.610211 | UP   | 491.2907 | 491.29   |
| 9346 | M437T11  | 1.111016 | 0.15188  | 0.148022 | 0.886261 | 0.610278 | UP   | 437.2629 | 437.2624 |
| 9347 | M346T21_ | 1.077772 | 0.108052 | 0.148613 | 0.88637  | 0.610307 | UP   | 346.2532 | 346.2526 |
| 9348 | M1017T30 | 1.060148 | 0.084266 | 0.150244 | 0.886415 | 0.610319 | UP   | 1016.674 | 1016.672 |
| 9349 | M179T7_1 | 1.124004 | 0.168647 | 0.147679 | 0.886762 | 0.610412 | UP   | 179.017  | 179.009  |
| 9350 | M930T30  | 1.019711 | -0.02816 | -0.14712 | 0.886798 | 0.610421 | DOWN | 929.6254 | 929.6234 |
| 9351 | M410T21  | 1.070948 | -0.09889 | -0.14693 | 0.886866 | 0.61044  | DOWN | 410.1623 | 410.1622 |
| 9352 | M478T25  | 1.089849 | -0.12413 | -0.14767 | 0.887182 | 0.610524 | DOWN | 478.3146 | 478.314  |

|      |          |          |          |          |          |          |      |          |          |
|------|----------|----------|----------|----------|----------|----------|------|----------|----------|
| 9353 | M549T11  | 1.131824 | 0.178649 | 0.146303 | 0.887458 | 0.610598 | UP   | 549.151  | 549.1488 |
| 9354 | M303T21  | 1.106945 | 0.146584 | 0.146054 | 0.887579 | 0.610631 | UP   | 303.0893 | 303.0891 |
| 9355 | M495T30  | 1.02094  | 0.029898 | 0.146688 | 0.887656 | 0.610651 | UP   | 495.34   | 495.3394 |
| 9356 | M288T26  | 1.089422 | 0.123563 | 0.146745 | 0.88766  | 0.610652 | UP   | 288.2901 | 288.2897 |
| 9357 | M499T32_ | 1.078007 | 0.108367 | 0.145489 | 0.8881   | 0.61077  | UP   | 499.3823 | 499.3821 |
| 9358 | M326T12  | 1.159139 | 0.213053 | 0.145218 | 0.888263 | 0.610814 | UP   | 326.2524 | 326.2517 |
| 9359 | M582T29_ | 1.079316 | 0.110117 | 0.145715 | 0.888317 | 0.610828 | UP   | 582.4354 | 582.4344 |
| 9360 | M395T21_ | 1.100325 | 0.137929 | 0.145304 | 0.888322 | 0.61083  | UP   | 395.2256 | 395.2254 |
| 9361 | M266T15_ | 1.080552 | -0.11177 | -0.14549 | 0.888457 | 0.610866 | DOWN | 266.1729 | 266.1726 |
| 9362 | M586T30  | 1.067291 | -0.09395 | -0.14499 | 0.888539 | 0.610888 | DOWN | 586.4986 | 586.4978 |
| 9363 | M260T18  | 1.081973 | 0.113664 | 0.144392 | 0.888955 | 0.610999 | UP   | 260.0795 | 260.0791 |
| 9364 | M410T24_ | 1.051937 | 0.073049 | 0.143827 | 0.889396 | 0.611117 | UP   | 410.1711 | 410.1704 |
| 9365 | M411T27  | 1.078944 | -0.10962 | -0.14361 | 0.8896   | 0.611171 | DOWN | 411.1451 | 411.1446 |
| 9366 | M637T32  | 1.139831 | 0.18882  | 0.145684 | 0.889815 | 0.611229 | UP   | 637.2608 | 637.2604 |
| 9367 | M471T9_1 | 1.115147 | 0.157233 | 0.144636 | 0.889874 | 0.611245 | UP   | 471.3539 | 471.3533 |
| 9368 | M422T45  | 1.023015 | 0.032828 | 0.142725 | 0.890048 | 0.611291 | UP   | 422.2383 | 422.2377 |
| 9369 | M506T20  | 1.094859 | -0.13074 | -0.14455 | 0.890255 | 0.611346 | DOWN | 506.2414 | 506.2406 |
| 9370 | M327T25  | 1.089422 | -0.12356 | -0.14346 | 0.890447 | 0.611397 | DOWN | 327.3373 | 327.3368 |
| 9371 | M394T28_ | 1.079173 | 0.109927 | 0.142767 | 0.890455 | 0.6114   | UP   | 394.2954 | 394.2949 |
| 9372 | M499T26_ | 1.151459 | 0.203464 | 0.14435  | 0.89059  | 0.611436 | UP   | 499.1444 | 499.1442 |
| 9373 | M788T21  | 1.131993 | -0.17886 | -0.14209 | 0.890609 | 0.611441 | DOWN | 788.2647 | 788.2645 |
| 9374 | M541T29_ | 1.077553 | -0.10776 | -0.14229 | 0.890858 | 0.611507 | DOWN | 541.4041 | 541.4032 |
| 9375 | M236T19_ | 1.09468  | -0.13051 | -0.14288 | 0.890898 | 0.611518 | DOWN | 236.0563 | 236.0561 |
| 9376 | M736T29_ | 1.062088 | 0.086904 | 0.142368 | 0.891116 | 0.611576 | UP   | 736.1779 | 736.1771 |
| 9377 | M425T18_ | 1.102531 | 0.140819 | 0.141225 | 0.891184 | 0.611594 | UP   | 425.3856 | 425.3849 |
| 9378 | M350T9_7 | 1.096114 | 0.132397 | 0.140406 | 0.89194  | 0.611796 | UP   | 350.2069 | 350.2062 |
| 9379 | M591T7   | 1.191185 | -0.2524  | -0.14045 | 0.892229 | 0.611872 | DOWN | 591.2425 | 591.2419 |
| 9380 | M384T18_ | 1.108085 | 0.148068 | 0.140648 | 0.89227  | 0.611883 | UP   | 384.1839 | 384.1799 |
| 9381 | M508T20  | 1.093314 | -0.12871 | -0.14149 | 0.892417 | 0.611923 | DOWN | 508.2372 | 508.2362 |
| 9382 | M413T21_ | 1.097701 | 0.134485 | 0.140082 | 0.89258  | 0.611966 | UP   | 413.161  | 413.1608 |
| 9383 | M477T19  | 1.08205  | -0.11377 | -0.13953 | 0.89261  | 0.611974 | DOWN | 477.2637 | 477.2635 |
| 9384 | M164T29  | 1.09356  | -0.12903 | -0.14034 | 0.892661 | 0.611987 | DOWN | 164.0787 | 164.0785 |
| 9385 | M323T28_ | 1.062468 | -0.08742 | -0.13901 | 0.893106 | 0.612106 | DOWN | 323.2411 | 323.2409 |
| 9386 | M342T26  | 1.08223  | -0.11401 | -0.13924 | 0.893133 | 0.612113 | DOWN | 342.2276 | 342.227  |
| 9387 | M650T41_ | 1.064179 | -0.08974 | -0.13866 | 0.893149 | 0.612117 | DOWN | 649.5015 | 649.5    |
| 9388 | M439T20  | 1.082272 | 0.114063 | 0.138889 | 0.893185 | 0.612127 | UP   | 439.3646 | 439.3632 |
| 9389 | M502T11  | 1.149962 | 0.201586 | 0.138881 | 0.893452 | 0.612198 | UP   | 502.1736 | 502.1724 |
| 9390 | M203T14  | 1.125263 | 0.170262 | 0.140293 | 0.893495 | 0.612209 | UP   | 203.0366 | 203.0363 |
| 9391 | M471T40  | 1.058706 | 0.082302 | 0.13894  | 0.893581 | 0.612232 | UP   | 471.3974 | 471.3966 |
| 9392 | M246T15  | 1.079522 | 0.110392 | 0.138936 | 0.893587 | 0.612234 | UP   | 246.1702 | 246.1696 |
| 9393 | M429T20  | 1.072757 | 0.101323 | 0.138548 | 0.893589 | 0.612234 | UP   | 429.225  | 429.2242 |
| 9394 | M222T10  | 1.159322 | -0.21328 | -0.13853 | 0.893764 | 0.61228  | DOWN | 221.5897 | 221.5895 |
| 9395 | M509T30_ | 1.071178 | 0.099198 | 0.137856 | 0.893764 | 0.61228  | UP   | 509.3431 | 509.3423 |
| 9396 | M240T25  | 1.078047 | -0.10842 | -0.14158 | 0.893829 | 0.612298 | DOWN | 240.1314 | 240.131  |
| 9397 | M863T25  | 1.108443 | 0.148534 | 0.137841 | 0.89383  | 0.612298 | UP   | 862.611  | 862.6102 |
| 9398 | M241T22_ | 1.075026 | 0.104372 | 0.138211 | 0.893895 | 0.612315 | UP   | 241.0762 | 241.076  |
| 9399 | M216T10_ | 1.160099 | 0.214248 | 0.13744  | 0.894172 | 0.612389 | UP   | 216.1402 | 216.1402 |



|      |          |          |          |          |          |          |      |          |          |
|------|----------|----------|----------|----------|----------|----------|------|----------|----------|
| 9400 | M168T19  | 1.091231 | -0.12596 | -0.13832 | 0.894295 | 0.612422 | DOWN | 167.9937 | 167.9933 |
| 9401 | M415T18_ | 1.085104 | 0.117833 | 0.137438 | 0.894563 | 0.612493 | UP   | 415.2932 | 415.2924 |
| 9402 | M458T26  | 1.126967 | -0.17244 | -0.13633 | 0.895021 | 0.612614 | DOWN | 458.239  | 458.2383 |
| 9403 | M274T20  | 1.07202  | 0.100332 | 0.1376   | 0.895297 | 0.612687 | UP   | 274.2743 | 274.2735 |
| 9404 | M391T17_ | 1.106969 | -0.14661 | -0.13782 | 0.895521 | 0.612747 | DOWN | 391.1319 | 391.1315 |
| 9405 | M382T17  | 1.083793 | 0.116089 | 0.135965 | 0.895542 | 0.612752 | UP   | 382.3149 | 382.3146 |
| 9406 | M211T17  | 1.100797 | 0.138549 | 0.136375 | 0.895735 | 0.612803 | UP   | 210.9689 | 210.9687 |
| 9407 | M435T34  | 1.060792 | 0.085142 | 0.136373 | 0.895888 | 0.612844 | UP   | 435.3446 | 435.3442 |
| 9408 | M792T29_ | 1.064919 | -0.09074 | -0.13842 | 0.895918 | 0.612852 | DOWN | 792.3662 | 792.3651 |
| 9409 | M438T13_ | 1.03606  | -0.05111 | -0.13501 | 0.896025 | 0.61288  | DOWN | 438.3218 | 438.3216 |
| 9410 | M595T29  | 1.100403 | 0.138032 | 0.134615 | 0.896424 | 0.612986 | UP   | 595.2999 | 595.2992 |
| 9411 | M223T11  | 1.066983 | 0.093537 | 0.134794 | 0.896846 | 0.613097 | UP   | 223.054  | 223.0535 |
| 9412 | M801T23_ | 1.10643  | -0.14591 | -0.13453 | 0.897016 | 0.613143 | DOWN | 800.5516 | 800.5512 |
| 9413 | M378T31_ | 1.049796 | -0.07011 | -0.13339 | 0.897182 | 0.613186 | DOWN | 378.2487 | 378.2483 |
| 9414 | M504T25  | 1.102388 | -0.14063 | -0.13404 | 0.897376 | 0.613238 | DOWN | 504.3222 | 504.3221 |
| 9415 | M313T19_ | 1.062303 | 0.087195 | 0.136345 | 0.897477 | 0.613264 | UP   | 313.1213 | 313.1212 |
| 9416 | M725T11_ | 1.087128 | -0.12052 | -0.1334  | 0.897538 | 0.61328  | DOWN | 725.3144 | 725.3123 |
| 9417 | M466T44  | 1.026109 | 0.037183 | 0.134238 | 0.897674 | 0.613316 | UP   | 466.2647 | 466.2639 |
| 9418 | M243T27  | 1.082001 | 0.113702 | 0.132485 | 0.898099 | 0.613429 | UP   | 243.2877 | 243.2875 |
| 9419 | M326T23_ | 1.073664 | -0.10254 | -0.13329 | 0.898153 | 0.613443 | DOWN | 326.3249 | 326.3246 |
| 9420 | M367T10_ | 1.149323 | 0.200785 | 0.132155 | 0.898194 | 0.613454 | UP   | 366.6593 | 366.659  |
| 9421 | M435T28  | 1.063156 | -0.08835 | -0.13211 | 0.898201 | 0.613455 | DOWN | 435.2954 | 435.2951 |
| 9422 | M333T32_ | 1.077473 | 0.107652 | 0.132495 | 0.898372 | 0.613501 | UP   | 333.2637 | 333.2634 |
| 9423 | M300T22_ | 1.093865 | 0.129434 | 0.132862 | 0.898397 | 0.613507 | UP   | 300.0898 | 300.0894 |
| 9424 | M311T23_ | 1.114697 | 0.156651 | 0.132474 | 0.898569 | 0.613553 | UP   | 310.9842 | 310.9841 |
| 9425 | M454T9_7 | 1.074104 | -0.10313 | -0.13169 | 0.898612 | 0.613564 | DOWN | 454.3465 | 454.3446 |
| 9426 | M327T27_ | 1.070131 | -0.09779 | -0.13218 | 0.898751 | 0.613601 | DOWN | 327.0783 | 327.0777 |
| 9427 | M443T18_ | 1.07215  | 0.100507 | 0.131565 | 0.898776 | 0.613607 | UP   | 443.3963 | 443.3948 |
| 9428 | M358T18_ | 1.114303 | -0.15614 | -0.13333 | 0.898794 | 0.613612 | DOWN | 357.9568 | 357.9562 |
| 9429 | M457T21_ | 1.087373 | 0.120846 | 0.131744 | 0.899033 | 0.613675 | UP   | 457.1799 | 457.179  |
| 9430 | M429T10_ | 1.102136 | -0.1403  | -0.13223 | 0.899117 | 0.613697 | DOWN | 429.2728 | 429.2722 |
| 9431 | M233T10_ | 1.063084 | 0.088256 | 0.13078  | 0.899185 | 0.613715 | UP   | 233.0912 | 233.0905 |
| 9432 | M437T33_ | 1.040946 | 0.057895 | 0.132139 | 0.899286 | 0.613742 | UP   | 437.3121 | 437.3114 |
| 9433 | M310T32  | 1.059273 | -0.08307 | -0.13027 | 0.899568 | 0.613816 | DOWN | 310.238  | 310.2379 |
| 9434 | M251T34  | 1.063989 | 0.089483 | 0.130484 | 0.899739 | 0.613861 | UP   | 251.2007 | 251.2003 |
| 9435 | M350T32_ | 1.077979 | 0.108329 | 0.129872 | 0.900083 | 0.613952 | UP   | 350.2904 | 350.2901 |
| 9436 | M295T23  | 1.056602 | 0.079431 | 0.131966 | 0.900411 | 0.614038 | UP   | 295.1179 | 295.1174 |
| 9437 | M389T11_ | 1.146656 | -0.19743 | -0.13127 | 0.900485 | 0.614057 | DOWN | 388.9656 | 388.9654 |
| 9438 | M289T23_ | 1.076384 | 0.106193 | 0.130357 | 0.900568 | 0.614079 | UP   | 289.176  | 289.1756 |
| 9439 | M285T27  | 1.066402 | -0.09275 | -0.12887 | 0.90087  | 0.614159 | DOWN | 285.1124 | 285.112  |
| 9440 | M315T23_ | 1.078217 | 0.108647 | 0.129226 | 0.900918 | 0.614172 | UP   | 314.6125 | 314.6121 |
| 9441 | M451T9_3 | 1.104891 | -0.1439  | -0.12926 | 0.901036 | 0.614202 | DOWN | 451.2526 | 451.2523 |
| 9442 | M295T9_1 | 1.104714 | 0.143673 | 0.129938 | 0.901082 | 0.614215 | UP   | 294.861  | 294.8606 |
| 9443 | M434T23_ | 1.062372 | 0.087289 | 0.129313 | 0.901217 | 0.61425  | UP   | 434.2445 | 434.2434 |
| 9444 | M398T30_ | 1.086779 | 0.120058 | 0.128007 | 0.90131  | 0.614275 | UP   | 397.9402 | 397.9396 |
| 9445 | M213T19_ | 1.072159 | -0.10052 | -0.12868 | 0.901426 | 0.614305 | DOWN | 213.0774 | 213.0769 |
| 9446 | M257T20  | 1.06106  | -0.08551 | -0.12855 | 0.901437 | 0.614308 | DOWN | 257.2225 | 257.2224 |

|      |          |          |          |          |          |          |      |          |          |
|------|----------|----------|----------|----------|----------|----------|------|----------|----------|
| 9447 | M719T27  | 1.086013 | 0.119042 | 0.128433 | 0.901485 | 0.614321 | UP   | 719.4993 | 719.4989 |
| 9448 | M349T9_6 | 1.137418 | 0.185763 | 0.128123 | 0.90151  | 0.614327 | UP   | 349.3847 | 349.3845 |
| 9449 | M213T20  | 1.05094  | 0.07168  | 0.129214 | 0.901533 | 0.614333 | UP   | 213.1486 | 213.1484 |
| 9450 | M538T20  | 1.128706 | -0.17467 | -0.12911 | 0.901554 | 0.614339 | DOWN | 538.0671 | 538.0662 |
| 9451 | M332T29  | 1.060445 | -0.08467 | -0.12755 | 0.901894 | 0.614428 | DOWN | 332.3161 | 332.3156 |
| 9452 | M426T21_ | 1.09716  | 0.133774 | 0.12734  | 0.90196  | 0.614445 | UP   | 426.1369 | 426.1368 |
| 9453 | M553T22_ | 1.070385 | 0.098129 | 0.127588 | 0.902137 | 0.614492 | UP   | 553.2267 | 553.2254 |
| 9454 | M295T28_ | 1.084211 | 0.116645 | 0.126967 | 0.902358 | 0.61455  | UP   | 295.3813 | 295.381  |
| 9455 | M225T21  | 1.049267 | -0.06938 | -0.12741 | 0.902445 | 0.614573 | DOWN | 225.0913 | 225.0911 |
| 9456 | M494T28_ | 1.065494 | -0.09152 | -0.12687 | 0.902645 | 0.614625 | DOWN | 494.3242 | 494.3234 |
| 9457 | M773T32  | 1.141415 | -0.19082 | -0.12834 | 0.902925 | 0.614699 | DOWN | 773.0684 | 773.0677 |
| 9458 | M641T32  | 1.079706 | 0.110639 | 0.126694 | 0.902988 | 0.614715 | UP   | 641.4482 | 641.4472 |
| 9459 | M323T21  | 1.092811 | -0.12804 | -0.12579 | 0.903006 | 0.61472  | DOWN | 323.0945 | 323.0942 |
| 9460 | M349T9_3 | 1.094021 | 0.129641 | 0.12681  | 0.903035 | 0.614727 | UP   | 349.2651 | 349.264  |
| 9461 | M571T35  | 1.091133 | -0.12583 | -0.12688 | 0.903316 | 0.614801 | DOWN | 571.4613 | 571.4606 |
| 9462 | M191T26_ | 1.06447  | -0.09014 | -0.1255  | 0.903468 | 0.614841 | DOWN | 191.0855 | 191.0853 |
| 9463 | M426T32  | 1.080868 | 0.112191 | 0.125067 | 0.903703 | 0.614903 | UP   | 426.3062 | 426.3057 |
| 9464 | M369T10_ | 1.071768 | 0.099993 | 0.127292 | 0.903762 | 0.614918 | UP   | 369.2572 | 369.2523 |
| 9465 | M374T9_1 | 1.125437 | -0.17049 | -0.12476 | 0.903879 | 0.614949 | DOWN | 374.1723 | 374.1704 |
| 9466 | M229T27  | 1.072936 | 0.101564 | 0.124744 | 0.903943 | 0.614966 | UP   | 229.1992 | 229.199  |
| 9467 | M417T19  | 1.087722 | -0.12131 | -0.12505 | 0.90458  | 0.615132 | DOWN | 417.3001 | 417.2995 |
| 9468 | M425T29  | 1.057844 | 0.081127 | 0.124011 | 0.904581 | 0.615132 | UP   | 425.3385 | 425.3377 |
| 9469 | M600T29_ | 1.081868 | -0.11352 | -0.12461 | 0.904613 | 0.615141 | DOWN | 600.4402 | 600.4394 |
| 9470 | M398T11  | 1.078841 | 0.109482 | 0.123889 | 0.904834 | 0.615199 | UP   | 398.2908 | 398.2903 |
| 9471 | M169T28  | 1.07654  | 0.106401 | 0.123387 | 0.90493  | 0.615224 | UP   | 168.997  | 168.9969 |
| 9472 | M404T22_ | 1.07275  | -0.10131 | -0.12458 | 0.904988 | 0.615239 | DOWN | 404.2993 | 404.2992 |
| 9473 | M631T18  | 1.125869 | 0.171039 | 0.123658 | 0.905289 | 0.615318 | UP   | 631.1332 | 631.1323 |
| 9474 | M274T10  | 1.099501 | 0.136849 | 0.123904 | 0.905613 | 0.615402 | UP   | 274.2013 | 274.2006 |
| 9475 | M496T28  | 1.061705 | -0.08638 | -0.12245 | 0.905823 | 0.615457 | DOWN | 496.3301 | 496.3297 |
| 9476 | M351T17  | 1.095766 | -0.13194 | -0.12401 | 0.905915 | 0.615481 | DOWN | 351.1088 | 351.1084 |
| 9477 | M342T35  | 1.06099  | -0.08541 | -0.1223  | 0.906409 | 0.61561  | DOWN | 342.2695 | 342.269  |
| 9478 | M547T9   | 1.074344 | -0.10346 | -0.12172 | 0.906566 | 0.615651 | DOWN | 547.3318 | 547.3311 |
| 9479 | M414T22_ | 1.058587 | 0.08214  | 0.122013 | 0.906731 | 0.615694 | UP   | 414.2853 | 414.2843 |
| 9480 | M327T35  | 1.054439 | 0.076475 | 0.121002 | 0.906836 | 0.615722 | UP   | 327.3816 | 327.3809 |
| 9481 | M403T16_ | 1.071343 | 0.09942  | 0.122815 | 0.907114 | 0.615794 | UP   | 403.0018 | 403.0006 |
| 9482 | M666T26  | 1.139055 | -0.18784 | -0.12281 | 0.907139 | 0.615801 | DOWN | 666.3127 | 666.3122 |
| 9483 | M376T20_ | 1.053159 | 0.074723 | 0.120177 | 0.907311 | 0.615846 | UP   | 376.3214 | 376.3208 |
| 9484 | M196T31  | 1.072405 | 0.10085  | 0.12004  | 0.907412 | 0.615872 | UP   | 196.0968 | 196.0966 |
| 9485 | M1290T25 | 1.126385 | -0.1717  | -0.12074 | 0.907554 | 0.615909 | DOWN | 1289.947 | 1289.946 |
| 9486 | M592T10  | 1.102943 | 0.141359 | 0.120317 | 0.907555 | 0.615909 | UP   | 592.209  | 592.2069 |
| 9487 | M332T23_ | 1.07224  | -0.10063 | -0.12048 | 0.907907 | 0.616001 | DOWN | 332.2798 | 332.2795 |
| 9488 | M427T22_ | 1.036572 | -0.05182 | -0.12049 | 0.90796  | 0.616015 | DOWN | 426.9753 | 426.9749 |
| 9489 | M318T20_ | 1.092833 | -0.12807 | -0.12115 | 0.908038 | 0.616035 | DOWN | 318.2795 | 318.2789 |
| 9490 | M455T24_ | 1.074455 | -0.1036  | -0.12024 | 0.908189 | 0.616075 | DOWN | 455.1841 | 455.1839 |
| 9491 | M338T25  | 1.083867 | -0.11619 | -0.11916 | 0.908813 | 0.616237 | DOWN | 338.2628 | 338.2625 |
| 9492 | M207T30_ | 1.1181   | -0.16105 | -0.12085 | 0.908816 | 0.616238 | DOWN | 207.1381 | 207.1379 |
| 9493 | M854T9   | 1.119776 | 0.16321  | 0.118124 | 0.909064 | 0.616302 | UP   | 853.6268 | 853.6247 |

|      |          |          |          |          |          |          |      |          |          |
|------|----------|----------|----------|----------|----------|----------|------|----------|----------|
| 9494 | M316T18  | 1.054223 | 0.07618  | 0.117995 | 0.909106 | 0.616313 | UP   | 316.2486 | 316.2481 |
| 9495 | M234T20  | 1.069142 | -0.09645 | -0.11804 | 0.909298 | 0.616363 | DOWN | 234.0949 | 234.0944 |
| 9496 | M847T23  | 1.083734 | 0.116011 | 0.11831  | 0.909403 | 0.616391 | UP   | 847.4472 | 847.4456 |
| 9497 | M866T37  | 1.10693  | 0.146564 | 0.119458 | 0.90957  | 0.616434 | UP   | 865.6522 | 865.6503 |
| 9498 | M600T31_ | 1.052981 | -0.07448 | -0.1176  | 0.909755 | 0.616482 | DOWN | 600.2609 | 600.2597 |
| 9499 | M306T32_ | 1.073143 | -0.10184 | -0.11791 | 0.909831 | 0.616502 | DOWN | 306.0914 | 306.0912 |
| 9500 | M341T31_ | 1.052804 | -0.07424 | -0.11669 | 0.91001  | 0.616548 | DOWN | 341.3164 | 341.3157 |
| 9501 | M293T9_1 | 1.082636 | 0.114549 | 0.117364 | 0.910168 | 0.616589 | UP   | 292.6936 | 292.6934 |
| 9502 | M494T27_ | 1.066177 | 0.092447 | 0.117004 | 0.910212 | 0.616601 | UP   | 494.3243 | 494.3235 |
| 9503 | M293T22  | 1.081903 | 0.113571 | 0.117488 | 0.910273 | 0.616616 | UP   | 293.1156 | 293.115  |
| 9504 | M293T28_ | 1.07766  | 0.107903 | 0.116331 | 0.910456 | 0.616664 | UP   | 293.2603 | 293.2601 |
| 9505 | M675T35  | 1.084279 | 0.116736 | 0.116584 | 0.910673 | 0.61672  | UP   | 675.4985 | 675.498  |
| 9506 | M286T22  | 1.07093  | -0.09886 | -0.11635 | 0.910686 | 0.616724 | DOWN | 286.1889 | 286.1885 |
| 9507 | M307T22_ | 1.06918  | 0.096505 | 0.116109 | 0.910732 | 0.616736 | UP   | 307.2484 | 307.2483 |
| 9508 | M410T19_ | 1.090976 | 0.12562  | 0.11547  | 0.911098 | 0.616831 | UP   | 410.0562 | 410.0561 |
| 9509 | M466T40  | 1.06761  | 0.094384 | 0.115904 | 0.911287 | 0.61688  | UP   | 465.5121 | 465.5115 |
| 9510 | M327T17_ | 1.081096 | -0.11249 | -0.11659 | 0.911343 | 0.616894 | DOWN | 327.0892 | 327.0891 |
| 9511 | M672T23  | 1.068028 | 0.09495  | 0.115539 | 0.911374 | 0.616902 | UP   | 672.2448 | 672.2434 |
| 9512 | M352T9   | 1.109545 | 0.149968 | 0.115618 | 0.911397 | 0.616908 | UP   | 351.7529 | 351.7518 |
| 9513 | M442T29  | 1.073772 | 0.102687 | 0.115272 | 0.911519 | 0.61694  | UP   | 442.3646 | 442.3641 |
| 9514 | M383T33_ | 1.055393 | 0.07778  | 0.114839 | 0.911868 | 0.61703  | UP   | 383.2258 | 383.2256 |
| 9515 | M455T21_ | 1.075659 | 0.10522  | 0.114535 | 0.912188 | 0.617113 | UP   | 455.1845 | 455.1833 |
| 9516 | M594T28_ | 1.054198 | 0.076146 | 0.114393 | 0.912258 | 0.617131 | UP   | 594.161  | 594.1602 |
| 9517 | M587T27  | 1.080831 | -0.11214 | -0.11466 | 0.912283 | 0.617138 | DOWN | 587.4199 | 587.4196 |
| 9518 | M313T26_ | 1.076327 | 0.106116 | 0.114622 | 0.912298 | 0.617142 | UP   | 313.1798 | 313.1794 |
| 9519 | M661T22  | 1.08806  | 0.121759 | 0.11379  | 0.912391 | 0.617166 | UP   | 661.2538 | 661.2532 |
| 9520 | M456T27  | 1.077714 | 0.107975 | 0.114102 | 0.912554 | 0.617208 | UP   | 456.1472 | 456.1469 |
| 9521 | M372T10_ | 1.066735 | 0.093201 | 0.114352 | 0.912568 | 0.617212 | UP   | 372.215  | 372.2143 |
| 9522 | M471T30  | 1.013447 | -0.01927 | -0.11304 | 0.912839 | 0.617282 | DOWN | 471.3317 | 471.3308 |
| 9523 | M496T11  | 1.107738 | -0.14762 | -0.11579 | 0.912872 | 0.61729  | DOWN | 496.1368 | 496.1353 |
| 9524 | M371T10_ | 1.086082 | 0.119133 | 0.113065 | 0.913185 | 0.617371 | UP   | 370.7178 | 370.7177 |
| 9525 | M362T31_ | 1.042384 | 0.059886 | 0.112866 | 0.913223 | 0.617381 | UP   | 362.2255 | 362.2249 |
| 9526 | M399T27_ | 1.049571 | -0.0698  | -0.11244 | 0.913341 | 0.617412 | DOWN | 399.3094 | 399.3084 |
| 9527 | M313T23_ | 1.060746 | 0.085079 | 0.112517 | 0.9138   | 0.61753  | UP   | 313.3213 | 313.3209 |
| 9528 | M301T31_ | 1.043206 | -0.06102 | -0.11181 | 0.91389  | 0.617553 | DOWN | 301.1412 | 301.1407 |
| 9529 | M420T24  | 1.054178 | -0.07612 | -0.11189 | 0.91403  | 0.61759  | DOWN | 420.2017 | 420.2012 |
| 9530 | M660T41_ | 1.066624 | -0.09305 | -0.11117 | 0.914231 | 0.617642 | DOWN | 660.232  | 660.2306 |
| 9531 | M239T22  | 1.030406 | 0.043213 | 0.111542 | 0.914308 | 0.617662 | UP   | 239.062  | 239.0617 |
| 9532 | M592T11_ | 1.113721 | 0.155388 | 0.112431 | 0.914446 | 0.617697 | UP   | 591.7953 | 591.7946 |
| 9533 | M359T16  | 1.094985 | -0.13091 | -0.11106 | 0.914482 | 0.617707 | DOWN | 359.2546 | 359.2545 |
| 9534 | M285T18_ | 1.071737 | 0.099951 | 0.110545 | 0.915126 | 0.617873 | UP   | 285.091  | 285.0903 |
| 9535 | M688T21_ | 1.092346 | -0.12743 | -0.11021 | 0.915168 | 0.617884 | DOWN | 688.3392 | 688.3387 |
| 9536 | M494T25  | 1.087845 | 0.121473 | 0.109596 | 0.915453 | 0.617957 | UP   | 494.4052 | 494.4045 |
| 9537 | M271T10  | 1.100578 | -0.13826 | -0.11183 | 0.915574 | 0.617988 | DOWN | 270.7279 | 270.7273 |
| 9538 | M754T35  | 1.070208 | -0.09789 | -0.11036 | 0.915714 | 0.618024 | DOWN | 753.6265 | 753.6256 |
| 9539 | M464T23_ | 1.088575 | -0.12244 | -0.10984 | 0.915837 | 0.618056 | DOWN | 464.0457 | 464.0366 |
| 9540 | M325T12  | 1.118906 | 0.162089 | 0.109036 | 0.915925 | 0.618079 | UP   | 325.2489 | 325.2486 |

|      |          |          |          |          |          |          |      |          |          |
|------|----------|----------|----------|----------|----------|----------|------|----------|----------|
| 9541 | M321T17_ | 1.054298 | -0.07628 | -0.1092  | 0.915927 | 0.618079 | DOWN | 321.0263 | 321.0261 |
| 9542 | M635T21_ | 1.079572 | 0.11046  | 0.109455 | 0.916004 | 0.618099 | UP   | 634.9973 | 634.9972 |
| 9543 | M334T20  | 1.111934 | -0.15307 | -0.11005 | 0.916203 | 0.61815  | DOWN | 334.0741 | 334.0739 |
| 9544 | M790T45  | 1.024889 | 0.035468 | 0.109881 | 0.916369 | 0.618193 | UP   | 789.6135 | 789.6122 |
| 9545 | M442T22_ | 1.088148 | -0.12187 | -0.10843 | 0.916605 | 0.618254 | DOWN | 442.1316 | 442.1313 |
| 9546 | M444T18_ | 1.09393  | 0.129521 | 0.108442 | 0.916698 | 0.618278 | UP   | 444.0856 | 444.085  |
| 9547 | M847T42  | 1.035242 | 0.049967 | 0.107698 | 0.916898 | 0.618329 | UP   | 846.6165 | 846.616  |
| 9548 | M720T20  | 1.080693 | -0.11196 | -0.10818 | 0.916921 | 0.618335 | DOWN | 720.415  | 720.4146 |
| 9549 | M537T20  | 1.114367 | 0.156225 | 0.108638 | 0.917012 | 0.618359 | UP   | 537.0703 | 537.0701 |
| 9550 | M293T35  | 1.070964 | -0.09891 | -0.10835 | 0.917139 | 0.618391 | DOWN | 293.288  | 293.2876 |
| 9551 | M395T20  | 1.099828 | 0.137278 | 0.1081   | 0.917296 | 0.618432 | UP   | 395.1155 | 395.1154 |
| 9552 | M434T11_ | 1.101122 | 0.138974 | 0.108334 | 0.917297 | 0.618432 | UP   | 434.2559 | 434.2557 |
| 9553 | M247T28  | 1.060362 | -0.08456 | -0.10788 | 0.917426 | 0.618465 | DOWN | 247.2269 | 247.2265 |
| 9554 | M491T26_ | 1.054426 | 0.076458 | 0.107121 | 0.917477 | 0.618478 | UP   | 491.3269 | 491.3264 |
| 9555 | M210T18  | 1.058259 | -0.08169 | -0.10765 | 0.917485 | 0.61848  | DOWN | 210.157  | 210.1565 |
| 9556 | M516T21  | 1.075342 | -0.1048  | -0.10879 | 0.917703 | 0.618537 | DOWN | 516.0536 | 516.0526 |
| 9557 | M320T20  | 1.064471 | -0.09014 | -0.10754 | 0.917708 | 0.618538 | DOWN | 320.0413 | 320.0405 |
| 9558 | M289T17  | 1.051628 | 0.072624 | 0.106109 | 0.918168 | 0.618656 | UP   | 289.2012 | 289.2006 |
| 9559 | M223T24  | 1.078641 | 0.109215 | 0.106155 | 0.918237 | 0.618674 | UP   | 223.1119 | 223.1116 |
| 9560 | M553T11  | 1.077991 | 0.108346 | 0.106031 | 0.918272 | 0.618683 | UP   | 553.1472 | 553.1446 |
| 9561 | M542T27_ | 1.054179 | -0.07612 | -0.10634 | 0.918443 | 0.618726 | DOWN | 542.3243 | 542.3235 |
| 9562 | M347T21_ | 1.05593  | 0.078515 | 0.106311 | 0.918515 | 0.618745 | UP   | 347.2567 | 347.2559 |
| 9563 | M312T37  | 1.050705 | 0.071357 | 0.105656 | 0.918701 | 0.618793 | UP   | 312.298  | 312.2977 |
| 9564 | M398T24  | 1.073759 | -0.10267 | -0.10597 | 0.918838 | 0.618828 | DOWN | 398.363  | 398.3624 |
| 9565 | M302T31_ | 1.047807 | -0.06737 | -0.10537 | 0.918976 | 0.618864 | DOWN | 302.1444 | 302.144  |
| 9566 | M401T10_ | 1.081043 | 0.112424 | 0.105327 | 0.919014 | 0.618873 | UP   | 401.4436 | 401.4419 |
| 9567 | M385T11  | 1.07592  | -0.10557 | -0.10506 | 0.919158 | 0.61891  | DOWN | 385.1993 | 385.1979 |
| 9568 | M365T41  | 1.027944 | 0.039762 | 0.106142 | 0.919208 | 0.618923 | UP   | 365.3458 | 365.3456 |
| 9569 | M344T22  | 1.062726 | 0.08777  | 0.104977 | 0.919268 | 0.618938 | UP   | 344.3357 | 344.3348 |
| 9570 | M382T23_ | 1.057849 | 0.081134 | 0.104575 | 0.919697 | 0.619049 | UP   | 382.3147 | 382.3144 |
| 9571 | M609T11  | 1.076533 | -0.10639 | -0.10389 | 0.920027 | 0.619133 | DOWN | 609.3996 | 609.3983 |
| 9572 | M434T45_ | 1.01485  | 0.021267 | 0.103578 | 0.92038  | 0.619224 | UP   | 434.2744 | 434.2739 |
| 9573 | M400T22_ | 1.059177 | 0.082944 | 0.103736 | 0.920398 | 0.619228 | UP   | 400.2852 | 400.2847 |
| 9574 | M461T24_ | 1.066511 | -0.0929  | -0.10477 | 0.920448 | 0.619241 | DOWN | 461.211  | 461.2101 |
| 9575 | M444T18_ | 1.054598 | -0.07669 | -0.10365 | 0.920522 | 0.61926  | DOWN | 444.3998 | 444.3991 |
| 9576 | M437T23_ | 1.078964 | -0.10965 | -0.10382 | 0.920554 | 0.619268 | DOWN | 436.9966 | 436.9963 |
| 9577 | M273T29_ | 1.054396 | -0.07642 | -0.10353 | 0.920658 | 0.619295 | DOWN | 273.185  | 273.1847 |
| 9578 | M314T33_ | 1.083419 | 0.115591 | 0.103959 | 0.920732 | 0.619314 | UP   | 314.1508 | 314.1505 |
| 9579 | M256T19_ | 1.05439  | 0.076408 | 0.102514 | 0.921167 | 0.619425 | UP   | 256.064  | 256.0634 |
| 9580 | M422T22_ | 1.056301 | -0.07902 | -0.10202 | 0.92127  | 0.619451 | DOWN | 422.3425 | 422.3418 |
| 9581 | M459T24_ | 1.055862 | -0.07842 | -0.10263 | 0.921546 | 0.619522 | DOWN | 459.2154 | 459.2144 |
| 9582 | M572T29_ | 1.034878 | 0.049461 | 0.101533 | 0.921717 | 0.619566 | UP   | 572.2643 | 572.2636 |
| 9583 | M277T20  | 1.072817 | 0.101404 | 0.101854 | 0.921852 | 0.6196   | UP   | 277.1437 | 277.1431 |
| 9584 | M300T9   | 1.072957 | -0.10159 | -0.10173 | 0.921893 | 0.619611 | DOWN | 300.1987 | 300.1983 |
| 9585 | M262T32  | 1.046237 | 0.06521  | 0.101388 | 0.922069 | 0.619656 | UP   | 262.2459 | 262.2455 |
| 9586 | M603T21_ | 1.072508 | 0.100988 | 0.101492 | 0.922105 | 0.619665 | UP   | 603.1108 | 603.1103 |
| 9587 | M542T19_ | 1.079772 | 0.110727 | 0.100812 | 0.922254 | 0.619703 | UP   | 542.0095 | 542.0092 |

|      |          |          |          |          |          |          |      |          |          |
|------|----------|----------|----------|----------|----------|----------|------|----------|----------|
| 9588 | M171T40  | 1.01345  | -0.01928 | -0.10048 | 0.922471 | 0.619758 | DOWN | 171.138  | 171.1378 |
| 9589 | M468T26  | 1.050148 | 0.070592 | 0.100338 | 0.92272  | 0.619822 | UP   | 468.3087 | 468.3078 |
| 9590 | M399T9_3 | 1.081746 | -0.11336 | -0.10018 | 0.922747 | 0.619829 | DOWN | 399.3283 | 399.3278 |
| 9591 | M444T27  | 1.054945 | 0.077168 | 0.100033 | 0.92282  | 0.619848 | UP   | 444.1834 | 444.1832 |
| 9592 | M431T22_ | 1.092981 | 0.128268 | 0.099875 | 0.922907 | 0.61987  | UP   | 431.0127 | 431.0124 |
| 9593 | M381T17_ | 1.049237 | 0.06934  | 0.100529 | 0.922917 | 0.619872 | UP   | 381.3114 | 381.3108 |
| 9594 | M486T18  | 1.087903 | 0.12155  | 0.100386 | 0.922936 | 0.619877 | UP   | 486.1084 | 486.1078 |
| 9595 | M268T23  | 1.082279 | 0.114072 | 0.100746 | 0.923239 | 0.619954 | UP   | 268.0997 | 268.0994 |
| 9596 | M502T20_ | 1.089521 | -0.12369 | -0.10107 | 0.92339  | 0.619993 | DOWN | 502.3145 | 502.3142 |
| 9597 | M381T23_ | 1.054062 | 0.075959 | 0.099637 | 0.923542 | 0.620032 | UP   | 381.3113 | 381.3107 |
| 9598 | M635T10  | 1.08011  | -0.11118 | -0.09944 | 0.923799 | 0.620097 | DOWN | 635.4001 | 635.3979 |
| 9599 | M540T44_ | 1.011375 | 0.016318 | 0.098732 | 0.923805 | 0.620099 | UP   | 540.3868 | 540.3857 |
| 9600 | M848T23  | 1.071497 | -0.09963 | -0.09933 | 0.923846 | 0.620109 | DOWN | 848.4506 | 848.4493 |
| 9601 | M580T30  | 1.061358 | 0.085911 | 0.098524 | 0.924052 | 0.620162 | UP   | 580.3997 | 580.3991 |
| 9602 | M300T23  | 1.057654 | -0.08087 | -0.09881 | 0.924058 | 0.620163 | DOWN | 300.0725 | 300.072  |
| 9603 | M673T23  | 1.059173 | 0.082938 | 0.098645 | 0.924223 | 0.620205 | UP   | 673.2482 | 673.2473 |
| 9604 | M548T33_ | 1.05047  | 0.071035 | 0.098227 | 0.924247 | 0.620212 | UP   | 548.407  | 548.4066 |
| 9605 | M476T7_1 | 1.111027 | -0.15189 | -0.0978  | 0.924694 | 0.620325 | DOWN | 476.3278 | 476.3272 |
| 9606 | M214T19  | 1.049863 | -0.0702  | -0.09788 | 0.924795 | 0.620351 | DOWN | 214.0699 | 214.0694 |
| 9607 | M435T23_ | 1.069504 | -0.09694 | -0.09806 | 0.925086 | 0.620425 | DOWN | 435.0011 | 435.0004 |
| 9608 | M238T32  | 1.071531 | 0.099673 | 0.097202 | 0.925212 | 0.620457 | UP   | 238.1884 | 238.1882 |
| 9609 | M412T20  | 1.059868 | -0.08388 | -0.09718 | 0.925416 | 0.620509 | DOWN | 412.0675 | 412.0672 |
| 9610 | M314T23_ | 1.052737 | 0.074145 | 0.097268 | 0.925427 | 0.620512 | UP   | 314.3247 | 314.3243 |
| 9611 | M519T23_ | 1.049518 | 0.069726 | 0.09655  | 0.925484 | 0.620527 | UP   | 519.0587 | 519.0587 |
| 9612 | M319T22_ | 1.061568 | -0.0862  | -0.09688 | 0.925716 | 0.620586 | DOWN | 319.187  | 319.1861 |
| 9613 | M363T9_1 | 1.064812 | -0.0906  | -0.09773 | 0.925793 | 0.620605 | DOWN | 362.9868 | 362.9862 |
| 9614 | M306T28_ | 1.049685 | 0.069956 | 0.096272 | 0.92606  | 0.620673 | UP   | 306.3067 | 306.3062 |
| 9615 | M653T23_ | 1.088908 | -0.12288 | -0.09788 | 0.926152 | 0.620696 | DOWN | 652.8616 | 652.8612 |
| 9616 | M504T30  | 1.055264 | -0.0776  | -0.0956  | 0.926225 | 0.620715 | DOWN | 504.3084 | 504.3077 |
| 9617 | M535T31  | 1.091772 | 0.126672 | 0.096211 | 0.926617 | 0.620815 | UP   | 535.0052 | 535.0046 |
| 9618 | M494T24  | 1.02783  | -0.0396  | -0.09574 | 0.926745 | 0.620847 | DOWN | 494.2765 | 494.2764 |
| 9619 | M337T9   | 1.041459 | -0.05861 | -0.0953  | 0.926784 | 0.620857 | DOWN | 337.2318 | 337.2308 |
| 9620 | M238T25_ | 1.090512 | 0.125006 | 0.095559 | 0.927003 | 0.620913 | UP   | 238.1884 | 238.1882 |
| 9621 | M673T26  | 1.057429 | 0.080561 | 0.094616 | 0.927453 | 0.621027 | UP   | 673.2484 | 673.2469 |
| 9622 | M659T35_ | 1.071221 | -0.09926 | -0.09535 | 0.92753  | 0.621047 | DOWN | 658.5107 | 658.5099 |
| 9623 | M407T13  | 1.090279 | 0.124697 | 0.095524 | 0.927562 | 0.621054 | UP   | 407.1056 | 407.1053 |
| 9624 | M388T20  | 1.089402 | -0.12354 | -0.09497 | 0.927674 | 0.621083 | DOWN | 388.1413 | 388.1409 |
| 9625 | M771T41  | 1.047402 | 0.066815 | 0.093658 | 0.927698 | 0.621089 | UP   | 771.3831 | 771.3816 |
| 9626 | M697T10_ | 1.073177 | 0.101888 | 0.093778 | 0.92773  | 0.621097 | UP   | 697.2024 | 697.2004 |
| 9627 | M361T22_ | 1.067771 | -0.0946  | -0.09488 | 0.927737 | 0.621099 | DOWN | 360.9549 | 360.9546 |
| 9628 | M290T38  | 1.058971 | 0.082663 | 0.093883 | 0.927789 | 0.621112 | UP   | 290.2772 | 290.277  |
| 9629 | M505T20  | 1.063423 | 0.088716 | 0.093983 | 0.927973 | 0.621159 | UP   | 505.2446 | 505.2438 |
| 9630 | M660T18  | 1.082378 | 0.114205 | 0.09345  | 0.928316 | 0.621246 | UP   | 660.1314 | 660.1311 |
| 9631 | M397T23_ | 1.073362 | 0.102137 | 0.09268  | 0.92861  | 0.62132  | UP   | 397.0948 | 397.0944 |
| 9632 | M278T19_ | 1.078773 | 0.109391 | 0.092565 | 0.928796 | 0.621367 | UP   | 278.1469 | 278.1463 |
| 9633 | M631T27  | 1.060779 | 0.085124 | 0.092596 | 0.92885  | 0.621381 | UP   | 631.4463 | 631.4456 |
| 9634 | M275T35  | 1.051652 | 0.072657 | 0.092319 | 0.929115 | 0.621448 | UP   | 275.2582 | 275.2577 |

|      |          |          |          |          |          |          |      |          |          |
|------|----------|----------|----------|----------|----------|----------|------|----------|----------|
| 9635 | M819T24  | 1.067308 | 0.093976 | 0.091714 | 0.929396 | 0.621519 | UP   | 818.5853 | 818.5843 |
| 9636 | M1155T30 | 1.052343 | 0.073606 | 0.091469 | 0.929514 | 0.621549 | UP   | 1154.525 | 1154.523 |
| 9637 | M212T19  | 1.046453 | 0.065508 | 0.09162  | 0.92962  | 0.621576 | UP   | 212.0742 | 212.0736 |
| 9638 | M476T15  | 1.056681 | 0.07954  | 0.091142 | 0.929643 | 0.621582 | UP   | 476.1579 | 476.1578 |
| 9639 | M774T30  | 1.076103 | 0.105816 | 0.091626 | 0.929721 | 0.621601 | UP   | 774.2013 | 774.2007 |
| 9640 | M312T30_ | 1.039574 | -0.05599 | -0.09133 | 0.929844 | 0.621633 | DOWN | 312.2535 | 312.2532 |
| 9641 | M816T30  | 1.099769 | 0.1372   | 0.09109  | 0.92991  | 0.621649 | UP   | 815.5254 | 815.5244 |
| 9642 | M224T21_ | 1.051412 | 0.072328 | 0.090648 | 0.93021  | 0.621725 | UP   | 224.1728 | 224.1723 |
| 9643 | M596T29_ | 1.065551 | 0.0916   | 0.090425 | 0.930375 | 0.621767 | UP   | 595.8015 | 595.8009 |
| 9644 | M527T18  | 1.072009 | 0.100317 | 0.090384 | 0.93055  | 0.621811 | UP   | 527.1354 | 527.1349 |
| 9645 | M472T22_ | 1.079363 | -0.11018 | -0.0909  | 0.930584 | 0.62182  | DOWN | 472.117  | 472.1159 |
| 9646 | M383T29  | 1.029909 | 0.042518 | 0.089856 | 0.93062  | 0.621829 | UP   | 383.167  | 383.1665 |
| 9647 | M315T23_ | 1.064145 | -0.08969 | -0.09091 | 0.930687 | 0.621846 | DOWN | 314.98   | 314.9796 |
| 9648 | M366T11_ | 1.077954 | 0.108296 | 0.08965  | 0.930827 | 0.621881 | UP   | 365.9619 | 365.9614 |
| 9649 | M228T22_ | 1.047141 | -0.06646 | -0.09055 | 0.930874 | 0.621893 | DOWN | 228.2041 | 228.2036 |
| 9650 | M267T39  | 1.022943 | -0.03273 | -0.09186 | 0.930928 | 0.621907 | DOWN | 267.2107 | 267.2106 |
| 9651 | M389T17  | 1.084713 | 0.117313 | 0.09026  | 0.930935 | 0.621908 | UP   | 389.0321 | 389.0276 |
| 9652 | M477T34_ | 1.062709 | 0.087746 | 0.089786 | 0.930952 | 0.621913 | UP   | 477.3396 | 477.3388 |
| 9653 | M427T30  | 1.011427 | 0.016393 | 0.089459 | 0.931096 | 0.621949 | UP   | 427.3055 | 427.3047 |
| 9654 | M329T27  | 1.067703 | -0.09451 | -0.0894  | 0.931139 | 0.62196  | DOWN | 329.3034 | 329.3033 |
| 9655 | M494T29_ | 1.055179 | -0.07749 | -0.08937 | 0.931165 | 0.621966 | DOWN | 494.3241 | 494.3232 |
| 9656 | M326T37  | 1.03805  | 0.053877 | 0.08912  | 0.931179 | 0.62197  | UP   | 326.3248 | 326.3246 |
| 9657 | M531T11  | 1.085986 | -0.11901 | -0.09007 | 0.9314   | 0.622026 | DOWN | 531.128  | 531.1267 |
| 9658 | M175T28  | 1.04417  | -0.06236 | -0.0891  | 0.931636 | 0.622085 | DOWN | 175.1117 | 175.1117 |
| 9659 | M437T21  | 1.050958 | 0.071704 | 0.088838 | 0.931699 | 0.622101 | UP   | 437.1936 | 437.1927 |
| 9660 | M815T30  | 1.097008 | 0.133574 | 0.088681 | 0.931781 | 0.622122 | UP   | 814.5216 | 814.5204 |
| 9661 | M418T9_2 | 1.045331 | -0.06396 | -0.08827 | 0.93232  | 0.622258 | DOWN | 418.2549 | 418.2542 |
| 9662 | M355T29  | 1.052169 | 0.073367 | 0.087646 | 0.932354 | 0.622267 | UP   | 355.2245 | 355.224  |
| 9663 | M162T33  | 1.05918  | -0.08295 | -0.08803 | 0.932488 | 0.6223   | DOWN | 162.0841 | 162.0839 |
| 9664 | M373T10_ | 1.044349 | -0.0626  | -0.08844 | 0.932648 | 0.622341 | DOWN | 372.7163 | 372.7156 |
| 9665 | M691T30_ | 1.090599 | 0.125121 | 0.087767 | 0.932872 | 0.622397 | UP   | 691.2208 | 691.2201 |
| 9666 | M730T10  | 1.07692  | -0.10691 | -0.08764 | 0.933005 | 0.622431 | DOWN | 729.5265 | 729.5261 |
| 9667 | M386T24_ | 1.048805 | 0.068746 | 0.087196 | 0.933121 | 0.62246  | UP   | 386.342  | 386.3415 |
| 9668 | M337T29  | 1.05824  | -0.08167 | -0.08567 | 0.93429  | 0.622754 | DOWN | 337.2867 | 337.2862 |
| 9669 | M880T34  | 1.054506 | 0.076567 | 0.085148 | 0.93436  | 0.622772 | UP   | 879.61   | 879.6081 |
| 9670 | M526T35  | 1.074751 | 0.104003 | 0.084677 | 0.934693 | 0.622855 | UP   | 526.4315 | 526.431  |
| 9671 | M453T27  | 1.056152 | 0.078818 | 0.084551 | 0.934898 | 0.622907 | UP   | 453.1685 | 453.1675 |
| 9672 | M436T20_ | 1.078642 | 0.109215 | 0.084891 | 0.935272 | 0.623001 | UP   | 436.1422 | 436.1417 |
| 9673 | M557T21  | 1.065555 | 0.091606 | 0.083934 | 0.935326 | 0.623014 | UP   | 557.09   | 557.0899 |
| 9674 | M414T23_ | 1.05234  | -0.0736  | -0.08378 | 0.935349 | 0.62302  | DOWN | 414.3693 | 414.3689 |
| 9675 | M321T31_ | 1.047903 | 0.067505 | 0.083685 | 0.935441 | 0.623043 | UP   | 321.1665 | 321.1663 |
| 9676 | M450T20  | 1.044399 | -0.06267 | -0.08401 | 0.935459 | 0.623048 | DOWN | 450.3219 | 450.3208 |
| 9677 | M377T41  | 1.020709 | 0.029572 | 0.083607 | 0.935491 | 0.623056 | UP   | 377.2293 | 377.2287 |
| 9678 | M270T25_ | 1.051433 | 0.072356 | 0.083554 | 0.935774 | 0.623127 | UP   | 270.1491 | 270.1487 |
| 9679 | M351T10_ | 1.070759 | 0.098634 | 0.083542 | 0.935816 | 0.623137 | UP   | 351.2512 | 351.2499 |
| 9680 | M328T37  | 1.043373 | -0.06125 | -0.08317 | 0.936086 | 0.623205 | DOWN | 328.3213 | 328.3209 |
| 9681 | M639T32  | 1.067497 | -0.09423 | -0.08267 | 0.93622  | 0.623239 | DOWN | 639.2716 | 639.2704 |

|      |          |          |          |          |          |          |      |          |          |
|------|----------|----------|----------|----------|----------|----------|------|----------|----------|
| 9682 | M397T23_ | 1.03627  | 0.0514   | 0.083266 | 0.936232 | 0.623242 | UP   | 397.201  | 397.2003 |
| 9683 | M327T32  | 1.022405 | -0.03197 | -0.08333 | 0.93632  | 0.623264 | DOWN | 327.1959 | 327.1958 |
| 9684 | M478T23_ | 1.056736 | 0.079616 | 0.083059 | 0.936345 | 0.62327  | UP   | 478.0231 | 478.0225 |
| 9685 | M458T24_ | 1.045874 | 0.064709 | 0.082994 | 0.936378 | 0.623278 | UP   | 458.3478 | 458.3466 |
| 9686 | M209T26  | 1.044337 | -0.06259 | -0.08239 | 0.936793 | 0.623382 | DOWN | 209.1537 | 209.1534 |
| 9687 | M204T28  | 1.042516 | -0.06007 | -0.08185 | 0.936951 | 0.623422 | DOWN | 204.1101 | 204.1097 |
| 9688 | M364T11_ | 1.079609 | 0.110509 | 0.081445 | 0.937094 | 0.623458 | UP   | 364.2031 | 364.1979 |
| 9689 | M344T23  | 1.04628  | 0.065269 | 0.081485 | 0.937383 | 0.62353  | UP   | 344.2796 | 344.2792 |
| 9690 | M390T20  | 1.069914 | 0.097495 | 0.081531 | 0.937713 | 0.623613 | UP   | 390.1366 | 390.1357 |
| 9691 | M456T21_ | 1.052527 | 0.073858 | 0.08117  | 0.937795 | 0.623633 | UP   | 456.1877 | 456.1868 |
| 9692 | M461T28  | 1.044787 | -0.06321 | -0.08155 | 0.937817 | 0.623639 | DOWN | 461.3739 | 461.3736 |
| 9693 | M611T35  | 1.052688 | 0.074078 | 0.080806 | 0.938084 | 0.623705 | UP   | 611.4372 | 611.4361 |
| 9694 | M316T40  | 1.052813 | -0.07425 | -0.0806  | 0.938088 | 0.623706 | DOWN | 316.2566 | 316.2562 |
| 9695 | M512T22  | 1.064942 | 0.090775 | 0.080652 | 0.93829  | 0.623757 | UP   | 512.1402 | 512.1391 |
| 9696 | M309T22_ | 1.055586 | -0.07804 | -0.08072 | 0.938385 | 0.623781 | DOWN | 309.1265 | 309.1261 |
| 9697 | M491T27_ | 1.038281 | -0.0542  | -0.08027 | 0.938508 | 0.623812 | DOWN | 491.1499 | 491.1491 |
| 9698 | M258T20  | 1.041746 | 0.059004 | 0.079447 | 0.938628 | 0.623842 | UP   | 258.2067 | 258.2067 |
| 9699 | M515T30_ | 1.044821 | -0.06326 | -0.07829 | 0.93969  | 0.624107 | DOWN | 515.3334 | 515.333  |
| 9700 | M498T19  | 1.053797 | 0.075597 | 0.07804  | 0.939941 | 0.62417  | UP   | 498.0148 | 498.0137 |
| 9701 | M307T23_ | 1.051892 | -0.07299 | -0.07903 | 0.940023 | 0.62419  | DOWN | 307.206  | 307.2056 |
| 9702 | M837T11_ | 1.061314 | -0.08585 | -0.07729 | 0.940441 | 0.624294 | DOWN | 836.5721 | 836.5716 |
| 9703 | M680T32  | 1.060696 | -0.08501 | -0.07709 | 0.940454 | 0.624297 | DOWN | 679.562  | 679.5611 |
| 9704 | M283T29_ | 1.022666 | -0.03233 | -0.07695 | 0.940743 | 0.62437  | DOWN | 283.1753 | 283.175  |
| 9705 | M287T25  | 1.044991 | 0.06349  | 0.077128 | 0.941141 | 0.624469 | UP   | 287.2776 | 287.2771 |
| 9706 | M508T23_ | 1.02613  | 0.037213 | 0.076805 | 0.94123  | 0.624491 | UP   | 508.2542 | 508.2537 |
| 9707 | M568T31_ | 1.02954  | -0.042   | -0.07603 | 0.941274 | 0.624502 | DOWN | 568.412  | 568.4114 |
| 9708 | M336T24  | 1.056791 | -0.07969 | -0.07639 | 0.941338 | 0.624518 | DOWN | 336.126  | 336.1258 |
| 9709 | M399T39  | 1.053746 | 0.075528 | 0.077258 | 0.941618 | 0.624588 | UP   | 399.1782 | 399.1777 |
| 9710 | M499T26_ | 1.056865 | 0.079792 | 0.075528 | 0.941666 | 0.6246   | UP   | 499.2763 | 499.2756 |
| 9711 | M525T31_ | 1.052172 | -0.07337 | -0.07558 | 0.94176  | 0.624623 | DOWN | 525.2966 | 525.2959 |
| 9712 | M241T27_ | 1.048195 | 0.067908 | 0.075716 | 0.941812 | 0.624636 | UP   | 241.0497 | 241.0493 |
| 9713 | M534T21  | 1.054904 | 0.077112 | 0.075705 | 0.942022 | 0.624688 | UP   | 534.0645 | 534.0642 |
| 9714 | M359T22_ | 1.053353 | -0.07499 | -0.07585 | 0.942024 | 0.624689 | DOWN | 359.1156 | 359.1155 |
| 9715 | M472T23_ | 1.040627 | -0.05745 | -0.07462 | 0.942538 | 0.624817 | DOWN | 472.3484 | 472.3483 |
| 9716 | M457T21_ | 1.05068  | 0.071324 | 0.074788 | 0.942547 | 0.624819 | UP   | 457.1799 | 457.1787 |
| 9717 | M435T11_ | 1.069589 | -0.09706 | -0.07446 | 0.943083 | 0.624952 | DOWN | 434.7577 | 434.7568 |
| 9718 | M380T24  | 1.046075 | -0.06499 | -0.07422 | 0.943154 | 0.62497  | DOWN | 380.2798 | 380.2793 |
| 9719 | M315T22  | 1.047564 | 0.067038 | 0.074095 | 0.943163 | 0.624972 | UP   | 315.1455 | 315.1454 |
| 9720 | M196T20  | 1.031788 | -0.04515 | -0.07443 | 0.943262 | 0.624997 | DOWN | 196.1413 | 196.1412 |
| 9721 | M342T9_2 | 1.035399 | -0.05019 | -0.07328 | 0.943636 | 0.625089 | DOWN | 341.7512 | 341.7507 |
| 9722 | M416T18  | 1.04412  | 0.062288 | 0.073216 | 0.943762 | 0.625121 | UP   | 416.2966 | 416.2961 |
| 9723 | M471T26_ | 1.041528 | -0.0587  | -0.07347 | 0.943789 | 0.625128 | DOWN | 471.3793 | 471.3727 |
| 9724 | M463T10_ | 1.072531 | 0.101019 | 0.072728 | 0.943925 | 0.625161 | UP   | 463.3259 | 463.3245 |
| 9725 | M317T18_ | 1.043949 | 0.062051 | 0.074148 | 0.944143 | 0.625215 | UP   | 317.1416 | 317.1413 |
| 9726 | M535T7   | 1.089412 | 0.12355  | 0.071669 | 0.944663 | 0.625344 | UP   | 535.2809 | 535.2802 |
| 9727 | M517T30  | 1.015404 | -0.02205 | -0.07217 | 0.944831 | 0.625386 | DOWN | 517.3531 | 517.3525 |
| 9728 | M533T7   | 1.085979 | 0.118996 | 0.071122 | 0.945062 | 0.625443 | UP   | 533.2837 | 533.2832 |

|      |          |          |          |          |          |          |      |          |          |
|------|----------|----------|----------|----------|----------|----------|------|----------|----------|
| 9729 | M478T22_ | 1.047204 | -0.06654 | -0.07139 | 0.9451   | 0.625453 | DOWN | 478.3531 | 478.3524 |
| 9730 | M295T22_ | 1.029383 | 0.04178  | 0.070733 | 0.94567  | 0.625594 | UP   | 295.1907 | 295.1903 |
| 9731 | M667T37  | 1.038515 | 0.054522 | 0.07023  | 0.945872 | 0.625644 | UP   | 666.5096 | 666.5086 |
| 9732 | M591T22  | 1.051028 | -0.0718  | -0.07094 | 0.945894 | 0.625649 | DOWN | 591.0498 | 591.0488 |
| 9733 | M572T29_ | 1.046377 | -0.0654  | -0.06991 | 0.946029 | 0.625683 | DOWN | 572.3014 | 572.2925 |
| 9734 | M448T21  | 1.030999 | 0.044043 | 0.069711 | 0.946278 | 0.625745 | UP   | 448.3199 | 448.3192 |
| 9735 | M395T28  | 1.04214  | -0.05955 | -0.06989 | 0.946432 | 0.625783 | DOWN | 395.2986 | 395.2984 |
| 9736 | M368T10_ | 1.086038 | 0.119074 | 0.069681 | 0.94657  | 0.625817 | UP   | 367.7385 | 367.7321 |
| 9737 | M706T10_ | 1.059525 | 0.083418 | 0.068862 | 0.946842 | 0.625884 | UP   | 705.8263 | 705.8256 |
| 9738 | M577T10_ | 1.058071 | -0.08144 | -0.06902 | 0.947072 | 0.625941 | DOWN | 577.4194 | 577.4176 |
| 9739 | M495T28  | 1.033756 | -0.0479  | -0.06868 | 0.947154 | 0.625961 | DOWN | 495.3277 | 495.3267 |
| 9740 | M356T44  | 1.031102 | 0.044188 | 0.069889 | 0.94739  | 0.62602  | UP   | 356.1892 | 356.1889 |
| 9741 | M472T9_1 | 1.045219 | -0.0638  | -0.06802 | 0.947565 | 0.626063 | DOWN | 472.3172 | 472.3153 |
| 9742 | M454T10_ | 1.05619  | 0.078869 | 0.068516 | 0.947683 | 0.626092 | UP   | 454.3285 | 454.327  |
| 9743 | M417T7   | 1.076706 | 0.106625 | 0.067475 | 0.947937 | 0.626155 | UP   | 417.1973 | 417.1967 |
| 9744 | M393T23  | 1.051382 | 0.072286 | 0.067334 | 0.947972 | 0.626163 | UP   | 393.0966 | 393.096  |
| 9745 | M395T21_ | 1.031567 | 0.044838 | 0.066745 | 0.948735 | 0.626352 | UP   | 395.2991 | 395.299  |
| 9746 | M317T23_ | 1.038069 | 0.053902 | 0.066455 | 0.948749 | 0.626355 | UP   | 317.2337 | 317.2331 |
| 9747 | M548T21_ | 1.035734 | 0.050653 | 0.066478 | 0.948754 | 0.626356 | UP   | 548.2708 | 548.2695 |
| 9748 | M451T9_2 | 1.036016 | -0.05105 | -0.06594 | 0.949196 | 0.626465 | DOWN | 451.1114 | 451.1096 |
| 9749 | M521T40  | 1.033673 | -0.04778 | -0.06571 | 0.949233 | 0.626474 | DOWN | 521.3669 | 521.3658 |
| 9750 | M692T30_ | 1.068472 | -0.09555 | -0.06671 | 0.949268 | 0.626483 | DOWN | 692.2239 | 692.2233 |
| 9751 | M314T29_ | 1.04033  | -0.05704 | -0.06583 | 0.949315 | 0.626495 | DOWN | 314.2481 | 314.2475 |
| 9752 | M241T22_ | 1.037121 | -0.05258 | -0.06569 | 0.949592 | 0.626563 | DOWN | 241.0498 | 241.0493 |
| 9753 | M496T31_ | 1.041205 | -0.05825 | -0.06564 | 0.94964  | 0.626575 | DOWN | 496.3899 | 496.3876 |
| 9754 | M575T32_ | 1.02296  | 0.03275  | 0.066559 | 0.949654 | 0.626578 | UP   | 575.4199 | 575.4187 |
| 9755 | M532T30_ | 1.034612 | 0.04909  | 0.065239 | 0.949665 | 0.626581 | UP   | 532.3398 | 532.3392 |
| 9756 | M325T23_ | 1.035913 | 0.050903 | 0.06526  | 0.949956 | 0.626653 | UP   | 325.3215 | 325.3209 |
| 9757 | M363T11_ | 1.03162  | -0.04491 | -0.06474 | 0.950122 | 0.626693 | DOWN | 363.3026 | 363.3    |
| 9758 | M300T28  | 1.029993 | 0.042634 | 0.064358 | 0.950381 | 0.626757 | UP   | 300.2899 | 300.2893 |
| 9759 | M433T25  | 1.042498 | 0.060044 | 0.064454 | 0.950405 | 0.626763 | UP   | 433.3813 | 433.3808 |
| 9760 | M793T26  | 1.04246  | -0.05999 | -0.06475 | 0.950486 | 0.626783 | DOWN | 793.2702 | 793.2684 |
| 9761 | M277T25  | 1.040052 | 0.056656 | 0.064517 | 0.950536 | 0.626795 | UP   | 277.2375 | 277.2369 |
| 9762 | M252T22  | 1.045466 | 0.064146 | 0.064671 | 0.950544 | 0.626797 | UP   | 252.0889 | 252.0885 |
| 9763 | M237T28  | 1.027805 | 0.039567 | 0.063812 | 0.950697 | 0.626835 | UP   | 237.0596 | 237.0592 |
| 9764 | M472T26  | 1.037714 | -0.05341 | -0.06438 | 0.950718 | 0.62684  | DOWN | 472.3828 | 472.3819 |
| 9765 | M458T13  | 1.053159 | 0.074723 | 0.064045 | 0.951316 | 0.626987 | UP   | 458.3378 | 458.3373 |
| 9766 | M865T23  | 1.051487 | -0.07243 | -0.06322 | 0.951335 | 0.626992 | DOWN | 864.9955 | 864.995  |
| 9767 | M470T40  | 1.019942 | -0.02849 | -0.06287 | 0.951433 | 0.627016 | DOWN | 470.4476 | 470.4467 |
| 9768 | M398T26  | 1.041272 | 0.058348 | 0.063895 | 0.951515 | 0.627036 | UP   | 398.0578 | 398.0571 |
| 9769 | M290T23  | 1.038545 | 0.054564 | 0.063152 | 0.951706 | 0.627083 | UP   | 290.1794 | 290.1789 |
| 9770 | M492T21  | 1.029806 | -0.04237 | -0.06228 | 0.951933 | 0.627139 | DOWN | 492.3456 | 492.3451 |
| 9771 | M656T35  | 1.047486 | 0.06693  | 0.062363 | 0.952052 | 0.627168 | UP   | 656.4664 | 656.4657 |
| 9772 | M179T9   | 1.038808 | 0.054929 | 0.062059 | 0.952077 | 0.627174 | UP   | 179.0638 | 179.0631 |
| 9773 | M431T19  | 1.035207 | -0.04992 | -0.06246 | 0.952103 | 0.62718  | DOWN | 431.2672 | 431.2667 |
| 9774 | M175T27  | 1.031209 | 0.044337 | 0.061943 | 0.952135 | 0.627188 | UP   | 175.0753 | 175.0752 |
| 9775 | M399T30_ | 1.079315 | -0.11012 | -0.06193 | 0.952177 | 0.627199 | DOWN | 399.2212 | 399.2171 |



|      |          |          |          |          |          |          |      |          |          |
|------|----------|----------|----------|----------|----------|----------|------|----------|----------|
| 9776 | M397T17  | 1.046084 | -0.065   | -0.06065 | 0.953162 | 0.62744  | DOWN | 397.0334 | 397.0332 |
| 9777 | M332T24_ | 1.022078 | -0.0315  | -0.06165 | 0.953253 | 0.627463 | DOWN | 332.2303 | 332.2301 |
| 9778 | M459T24_ | 1.037468 | 0.053067 | 0.059975 | 0.954014 | 0.627649 | UP   | 459.3512 | 459.3506 |
| 9779 | M223T21  | 1.032442 | 0.046061 | 0.059525 | 0.954177 | 0.627689 | UP   | 223.1695 | 223.1689 |
| 9780 | M887T30  | 1.007781 | -0.01118 | -0.05967 | 0.954222 | 0.6277   | DOWN | 886.602  | 886.6008 |
| 9781 | M589T10  | 1.056579 | 0.079401 | 0.059069 | 0.954413 | 0.627747 | UP   | 588.9124 | 588.9115 |
| 9782 | M310T24  | 1.033512 | 0.047555 | 0.059267 | 0.954519 | 0.627773 | UP   | 310.2017 | 310.2012 |
| 9783 | M240T33  | 1.020485 | 0.029256 | 0.058763 | 0.954653 | 0.627806 | UP   | 240.2687 | 240.2682 |
| 9784 | M362T21  | 1.033987 | 0.048218 | 0.059096 | 0.954714 | 0.627821 | UP   | 362.2693 | 362.2689 |
| 9785 | M553T24_ | 1.035604 | -0.05047 | -0.05899 | 0.954849 | 0.627854 | DOWN | 553.2264 | 553.2254 |
| 9786 | M553T24_ | 1.035245 | 0.049972 | 0.058671 | 0.954874 | 0.62786  | UP   | 553.2265 | 553.2253 |
| 9787 | M322T19_ | 1.02736  | 0.038942 | 0.059307 | 0.954933 | 0.627874 | UP   | 322.238  | 322.2373 |
| 9788 | M430T20_ | 1.030608 | 0.043496 | 0.058409 | 0.954987 | 0.627888 | UP   | 430.2283 | 430.2275 |
| 9789 | M179T7_2 | 1.053755 | 0.075539 | 0.057635 | 0.955593 | 0.628036 | UP   | 179.0172 | 179.0168 |
| 9790 | M402T18_ | 1.033967 | 0.048191 | 0.056604 | 0.956251 | 0.628196 | UP   | 401.9935 | 401.9864 |
| 9791 | M526T27  | 1.034565 | 0.049025 | 0.056649 | 0.956453 | 0.628246 | UP   | 526.1498 | 526.1488 |
| 9792 | M349T24_ | 1.040281 | 0.056973 | 0.056701 | 0.956476 | 0.628252 | UP   | 349.3298 | 349.3292 |
| 9793 | M431T17_ | 1.041754 | -0.05902 | -0.05746 | 0.956539 | 0.628267 | DOWN | 431.0793 | 431.0792 |
| 9794 | M706T32_ | 1.044504 | 0.062818 | 0.056568 | 0.956602 | 0.628282 | UP   | 706.2341 | 706.233  |
| 9795 | M280T22  | 1.028307 | -0.04027 | -0.05618 | 0.956649 | 0.628294 | DOWN | 280.2486 | 280.2483 |
| 9796 | M257T19  | 1.031217 | -0.04435 | -0.05617 | 0.956738 | 0.628315 | DOWN | 257.0673 | 257.0668 |
| 9797 | M387T17  | 1.044534 | 0.06286  | 0.055543 | 0.957217 | 0.628432 | UP   | 387.0928 | 387.0926 |
| 9798 | M215T23  | 1.030398 | 0.043202 | 0.0555   | 0.95745  | 0.628489 | UP   | 215.1835 | 215.1831 |
| 9799 | M254T23  | 1.026775 | 0.03812  | 0.05578  | 0.957698 | 0.62855  | UP   | 254.1833 | 254.183  |
| 9800 | M598T30_ | 1.038417 | 0.054386 | 0.054793 | 0.957822 | 0.62858  | UP   | 597.817  | 597.8164 |
| 9801 | M645T10  | 1.043743 | -0.06177 | -0.05472 | 0.958066 | 0.628639 | DOWN | 645.4323 | 645.4321 |
| 9802 | M291T9_1 | 1.03632  | -0.05147 | -0.05401 | 0.958469 | 0.628738 | DOWN | 290.5908 | 290.5903 |
| 9803 | M296T28_ | 1.032717 | -0.04645 | -0.05384 | 0.958593 | 0.628768 | DOWN | 296.1971 | 296.1968 |
| 9804 | M267T26_ | 1.033211 | 0.047135 | 0.053943 | 0.95866  | 0.628784 | UP   | 267.2797 | 267.2793 |
| 9805 | M467T30_ | 1.039418 | -0.05578 | -0.05327 | 0.958923 | 0.628848 | DOWN | 467.3663 | 467.366  |
| 9806 | M791T10_ | 1.035275 | 0.050014 | 0.052925 | 0.959119 | 0.628896 | UP   | 791.4269 | 791.4266 |
| 9807 | M525T31_ | 1.032561 | -0.04623 | -0.05278 | 0.959206 | 0.628917 | DOWN | 524.8012 | 524.8003 |
| 9808 | M228T32_ | 1.025861 | -0.03683 | -0.05274 | 0.959452 | 0.628977 | DOWN | 228.204  | 228.2038 |
| 9809 | M331T17_ | 1.025489 | 0.036312 | 0.052452 | 0.959475 | 0.628982 | UP   | 331.2481 | 331.2477 |
| 9810 | M325T9   | 1.04344  | 0.061348 | 0.052808 | 0.959557 | 0.629002 | UP   | 324.6207 | 324.6205 |
| 9811 | M358T19  | 1.034743 | 0.049272 | 0.052654 | 0.959633 | 0.629021 | UP   | 357.9893 | 357.9892 |
| 9812 | M604T21  | 1.038662 | 0.054727 | 0.052143 | 0.95974  | 0.629047 | UP   | 604.1663 | 604.1658 |
| 9813 | M551T22_ | 1.042603 | -0.06019 | -0.05256 | 0.959824 | 0.629067 | DOWN | 551.1718 | 551.1713 |
| 9814 | M974T30  | 1.01433  | 0.020527 | 0.051835 | 0.959989 | 0.629107 | UP   | 973.6508 | 973.6504 |
| 9815 | M228T34  | 1.028545 | -0.04061 | -0.05168 | 0.960215 | 0.629162 | DOWN | 228.2322 | 228.2318 |
| 9816 | M787T21  | 1.04418  | 0.062371 | 0.051184 | 0.960435 | 0.629216 | UP   | 787.2613 | 787.2608 |
| 9817 | M583T20  | 1.031035 | -0.04409 | -0.05121 | 0.960678 | 0.629275 | DOWN | 583.1716 | 583.1709 |
| 9818 | M168T31  | 1.032735 | -0.04647 | -0.05044 | 0.961015 | 0.629356 | DOWN | 168.1019 | 168.1018 |
| 9819 | M415T32_ | 1.045204 | 0.063785 | 0.050767 | 0.961338 | 0.629435 | UP   | 414.6917 | 414.6915 |
| 9820 | M498T7   | 1.05148  | 0.072421 | 0.0501   | 0.961345 | 0.629437 | UP   | 498.3649 | 498.3639 |
| 9821 | M343T29_ | 1.043751 | -0.06178 | -0.05067 | 0.961483 | 0.62947  | DOWN | 343.1539 | 343.1442 |
| 9822 | M616T18  | 1.025942 | -0.03695 | -0.04929 | 0.961929 | 0.629578 | DOWN | 616.4279 | 616.4277 |

|      |          |          |          |          |          |          |      |          |          |
|------|----------|----------|----------|----------|----------|----------|------|----------|----------|
| 9823 | M552T24_ | 1.029124 | 0.041417 | 0.049306 | 0.962127 | 0.629626 | UP   | 552.2231 | 552.2219 |
| 9824 | M286T33_ | 1.029354 | -0.04174 | -0.04885 | 0.962254 | 0.629657 | DOWN | 286.2378 | 286.2374 |
| 9825 | M364T40_ | 1.033311 | -0.04727 | -0.04861 | 0.962425 | 0.629698 | DOWN | 364.3138 | 364.3073 |
| 9826 | M511T31  | 1.047393 | 0.066803 | 0.049238 | 0.962658 | 0.629755 | UP   | 511.1779 | 511.1776 |
| 9827 | M220T28  | 1.027942 | -0.03976 | -0.0482  | 0.962789 | 0.629787 | DOWN | 220.1661 | 220.166  |
| 9828 | M462T23_ | 1.024578 | 0.035029 | 0.048051 | 0.962868 | 0.629806 | UP   | 462.2836 | 462.283  |
| 9829 | M484T20_ | 1.028769 | 0.04092  | 0.048123 | 0.962988 | 0.629835 | UP   | 484.3943 | 484.3933 |
| 9830 | M752T35  | 1.028621 | -0.04071 | -0.04835 | 0.963156 | 0.629875 | DOWN | 751.6204 | 751.619  |
| 9831 | M675T27  | 1.031352 | 0.044536 | 0.047116 | 0.963829 | 0.630038 | UP   | 675.4729 | 675.4722 |
| 9832 | M229T22  | 1.016566 | 0.023704 | 0.046815 | 0.963884 | 0.630051 | UP   | 229.0729 | 229.0728 |
| 9833 | M1169T33 | 1.035024 | -0.04966 | -0.04683 | 0.964004 | 0.630081 | DOWN | 1168.541 | 1168.539 |
| 9834 | M469T26_ | 1.024165 | 0.034448 | 0.046621 | 0.96403  | 0.630087 | UP   | 469.312  | 469.3111 |
| 9835 | M321T38  | 1.016821 | 0.024065 | 0.046594 | 0.964068 | 0.630096 | UP   | 321.2062 | 321.2061 |
| 9836 | M406T22_ | 1.026161 | 0.037257 | 0.0465   | 0.964189 | 0.630125 | UP   | 406.1289 | 406.1281 |
| 9837 | M605T9   | 1.042974 | -0.0607  | -0.04646 | 0.964216 | 0.630132 | DOWN | 605.2402 | 605.2397 |
| 9838 | M263T22_ | 1.027494 | -0.03913 | -0.04654 | 0.964237 | 0.630137 | DOWN | 263.2219 | 263.2212 |
| 9839 | M461T27  | 1.025804 | 0.036755 | 0.046432 | 0.964304 | 0.630153 | UP   | 461.374  | 461.3731 |
| 9840 | M272T22  | 1.03238  | -0.04597 | -0.04684 | 0.964306 | 0.630154 | DOWN | 272.0949 | 272.0941 |
| 9841 | M651T21  | 1.032877 | -0.04667 | -0.0461  | 0.964439 | 0.630186 | DOWN | 651.4465 | 651.4462 |
| 9842 | M392T13_ | 1.052682 | 0.074069 | 0.045991 | 0.964566 | 0.630216 | UP   | 391.952  | 391.9517 |
| 9843 | M397T22_ | 1.025585 | 0.036447 | 0.045835 | 0.964876 | 0.630291 | UP   | 397.2587 | 397.2578 |
| 9844 | M583T18  | 1.04126  | 0.058331 | 0.045627 | 0.964966 | 0.630313 | UP   | 583.2219 | 583.2213 |
| 9845 | M452T9_2 | 1.024563 | -0.03501 | -0.04551 | 0.965067 | 0.630337 | DOWN | 452.1072 | 452.1053 |
| 9846 | M616T10_ | 1.034233 | 0.048561 | 0.045106 | 0.96514  | 0.630355 | UP   | 616.4544 | 616.4539 |
| 9847 | M392T26  | 1.014368 | 0.020581 | 0.045832 | 0.96514  | 0.630355 | UP   | 392.1607 | 392.1604 |
| 9848 | M592T22_ | 1.026516 | 0.037756 | 0.045302 | 0.96529  | 0.630391 | UP   | 592.0532 | 592.053  |
| 9849 | M299T16  | 1.033478 | -0.04751 | -0.04466 | 0.965601 | 0.630466 | DOWN | 299.1181 | 299.1178 |
| 9850 | M681T22  | 1.02381  | 0.033948 | 0.044398 | 0.965756 | 0.630504 | UP   | 681.4332 | 681.4318 |
| 9851 | M444T30_ | 1.022458 | -0.03204 | -0.04356 | 0.966323 | 0.63064  | DOWN | 444.3083 | 444.3078 |
| 9852 | M464T11_ | 1.044218 | 0.062423 | 0.043465 | 0.966415 | 0.630663 | UP   | 464.132  | 464.1305 |
| 9853 | M207T10_ | 1.037326 | 0.05287  | 0.04333  | 0.966581 | 0.630703 | UP   | 207.1234 | 207.123  |
| 9854 | M325T18  | 1.041601 | -0.0588  | -0.04318 | 0.966742 | 0.630741 | DOWN | 325.2781 | 325.278  |
| 9855 | M438T21  | 1.023229 | -0.03313 | -0.04317 | 0.966767 | 0.630747 | DOWN | 438.1972 | 438.1969 |
| 9856 | M272T32_ | 1.020594 | 0.029409 | 0.042973 | 0.966837 | 0.630764 | UP   | 272.1611 | 272.1607 |
| 9857 | M227T26  | 1.017734 | 0.025361 | 0.043221 | 0.966944 | 0.63079  | UP   | 227.0731 | 227.0726 |
| 9858 | M528T25  | 1.036933 | -0.05232 | -0.04248 | 0.967293 | 0.630874 | DOWN | 528.3744 | 528.3738 |
| 9859 | M477T23_ | 1.029628 | -0.04212 | -0.04235 | 0.967491 | 0.630922 | DOWN | 477.0309 | 477.0299 |
| 9860 | M283T13  | 1.040229 | 0.056901 | 0.041847 | 0.967841 | 0.631006 | UP   | 283.0089 | 283.0086 |
| 9861 | M554T27_ | 1.020254 | 0.028929 | 0.041824 | 0.96789  | 0.631018 | UP   | 554.0765 | 554.0757 |
| 9862 | M213T19_ | 1.019441 | -0.02778 | -0.04156 | 0.968164 | 0.631084 | DOWN | 213.185  | 213.1845 |
| 9863 | M623T31  | 1.030995 | -0.04404 | -0.04128 | 0.968184 | 0.631088 | DOWN | 623.2244 | 623.2243 |
| 9864 | M417T23_ | 1.017954 | 0.025672 | 0.040905 | 0.968657 | 0.631202 | UP   | 417.2182 | 417.2173 |
| 9865 | M224T11  | 1.026529 | 0.037774 | 0.040815 | 0.968975 | 0.631279 | UP   | 224.2125 | 224.212  |
| 9866 | M335T21_ | 1.019793 | -0.02828 | -0.0405  | 0.969024 | 0.63129  | DOWN | 335.1817 | 335.1814 |
| 9867 | M315T40  | 1.026243 | 0.037372 | 0.040216 | 0.969047 | 0.631296 | UP   | 315.2531 | 315.2525 |
| 9868 | M582T18  | 1.035757 | 0.050685 | 0.040231 | 0.96911  | 0.631311 | UP   | 582.2189 | 582.2179 |
| 9869 | M542T19_ | 1.016897 | 0.024173 | 0.03991  | 0.969146 | 0.63132  | UP   | 542.2882 | 542.2878 |

|      |          |          |          |          |          |          |      |          |          |
|------|----------|----------|----------|----------|----------|----------|------|----------|----------|
| 9870 | M305T24_ | 1.022798 | -0.03252 | -0.04    | 0.969354 | 0.631369 | DOWN | 305.2882 | 305.2876 |
| 9871 | M353T44_ | 1.009715 | 0.013948 | 0.039745 | 0.96948  | 0.6314   | UP   | 353.3415 | 353.3408 |
| 9872 | M510T22  | 1.033308 | -0.04727 | -0.03992 | 0.969513 | 0.631408 | DOWN | 510.145  | 510.1442 |
| 9873 | M231T2   | 1.022773 | -0.03249 | -0.03949 | 0.969522 | 0.63141  | DOWN | 230.8897 | 230.8894 |
| 9874 | M342T10_ | 1.02972  | -0.04225 | -0.0392  | 0.9698   | 0.631477 | DOWN | 341.8313 | 341.8306 |
| 9875 | M391T20  | 1.036262 | -0.05139 | -0.039   | 0.970238 | 0.631582 | DOWN | 391.14   | 391.1392 |
| 9876 | M304T24  | 1.021232 | -0.03031 | -0.03878 | 0.970345 | 0.631607 | DOWN | 304.2847 | 304.2842 |
| 9877 | M415T23_ | 1.018893 | -0.027   | -0.03829 | 0.970477 | 0.631639 | DOWN | 415.2118 | 415.2111 |
| 9878 | M259T27  | 1.01326  | -0.019   | -0.03863 | 0.970601 | 0.631669 | DOWN | 259.1654 | 259.165  |
| 9879 | M644T32  | 1.025013 | 0.035643 | 0.038032 | 0.97064  | 0.631678 | UP   | 644.2629 | 644.2611 |
| 9880 | M273T29_ | 1.019279 | 0.027549 | 0.037978 | 0.970843 | 0.631727 | UP   | 273.2426 | 273.2422 |
| 9881 | M281T30_ | 1.011185 | 0.016046 | 0.03725  | 0.971198 | 0.631812 | UP   | 281.295  | 281.2947 |
| 9882 | M348T15  | 1.016016 | 0.022924 | 0.037603 | 0.971367 | 0.631852 | UP   | 348.2147 | 348.2146 |
| 9883 | M724T22  | 1.019395 | 0.027713 | 0.03715  | 0.971391 | 0.631858 | UP   | 724.34   | 724.3382 |
| 9884 | M294T25  | 1.026447 | 0.037659 | 0.03729  | 0.971453 | 0.631873 | UP   | 294.2641 | 294.2638 |
| 9885 | M542T26  | 1.019776 | 0.028252 | 0.036806 | 0.971583 | 0.631904 | UP   | 542.3243 | 542.3234 |
| 9886 | M331T35_ | 1.019064 | 0.027244 | 0.036173 | 0.972094 | 0.632026 | UP   | 331.1569 | 331.1567 |
| 9887 | M469T27  | 1.022117 | 0.031561 | 0.035958 | 0.972277 | 0.63207  | UP   | 469.1996 | 469.199  |
| 9888 | M309T20_ | 1.022832 | 0.032569 | 0.036046 | 0.97228  | 0.632071 | UP   | 309.098  | 309.0978 |
| 9889 | M292T14  | 1.018796 | 0.026865 | 0.035792 | 0.972337 | 0.632084 | UP   | 292.1759 | 292.1753 |
| 9890 | M259T31  | 1.016244 | -0.02325 | -0.03576 | 0.972409 | 0.632102 | DOWN | 259.154  | 259.1538 |
| 9891 | M610T11_ | 1.026298 | 0.03745  | 0.035596 | 0.972533 | 0.632131 | UP   | 610.4032 | 610.4021 |
| 9892 | M384T24_ | 1.02121  | -0.03028 | -0.03579 | 0.972577 | 0.632142 | DOWN | 384.3586 | 384.3579 |
| 9893 | M296T28_ | 1.021323 | 0.030439 | 0.035509 | 0.972743 | 0.632181 | UP   | 296.2132 | 296.213  |
| 9894 | M153T19  | 1.01495  | 0.021408 | 0.034854 | 0.973083 | 0.632263 | UP   | 153.0481 | 153.048  |
| 9895 | M370T16  | 1.022512 | -0.03212 | -0.03486 | 0.973172 | 0.632284 | DOWN | 370.0265 | 370.0261 |
| 9896 | M352T10  | 1.035448 | 0.050255 | 0.034904 | 0.973209 | 0.632293 | UP   | 352.2541 | 352.2437 |
| 9897 | M553T22_ | 1.027953 | 0.039774 | 0.034875 | 0.973326 | 0.632321 | UP   | 553.1669 | 553.1658 |
| 9898 | M343T22_ | 1.019441 | 0.027778 | 0.034025 | 0.97382  | 0.632439 | UP   | 343.3323 | 343.3315 |
| 9899 | M210T9_2 | 1.012849 | -0.01842 | -0.03403 | 0.973852 | 0.632446 | DOWN | 210.1679 | 210.1676 |
| 9900 | M339T34  | 1.012822 | -0.01838 | -0.03373 | 0.973953 | 0.63247  | DOWN | 339.2895 | 339.289  |
| 9901 | M598T30_ | 1.01386  | 0.019858 | 0.033667 | 0.974008 | 0.632484 | UP   | 598.2664 | 598.2567 |
| 9902 | M665T11  | 1.028538 | 0.040596 | 0.033794 | 0.974019 | 0.632486 | UP   | 665.3904 | 665.3887 |
| 9903 | M227T22  | 1.016773 | -0.024   | -0.03382 | 0.974216 | 0.632533 | DOWN | 227.2008 | 227.2003 |
| 9904 | M672T30  | 1.019002 | -0.02716 | -0.03329 | 0.974328 | 0.63256  | DOWN | 672.2813 | 672.2809 |
| 9905 | M459T44  | 1.007728 | -0.01111 | -0.0336  | 0.974577 | 0.632619 | DOWN | 459.2656 | 459.2648 |
| 9906 | M287T13  | 1.03147  | -0.0447  | -0.03342 | 0.974679 | 0.632644 | DOWN | 287.0482 | 287.0476 |
| 9907 | M212T28  | 1.017093 | 0.024451 | 0.03246  | 0.975035 | 0.632729 | UP   | 212.2374 | 212.2369 |
| 9908 | M488T42_ | 1.008313 | 0.011943 | 0.032967 | 0.975134 | 0.632752 | UP   | 488.2691 | 488.2691 |
| 9909 | M488T44  | 1.005164 | 0.007431 | 0.031972 | 0.975451 | 0.632828 | UP   | 488.2694 | 488.2693 |
| 9910 | M208T18  | 1.017081 | 0.024435 | 0.031766 | 0.975561 | 0.632854 | UP   | 207.9886 | 207.9884 |
| 9911 | M453T16  | 1.014474 | -0.02073 | -0.03181 | 0.97557  | 0.632856 | DOWN | 453.3438 | 453.3355 |
| 9912 | M637T10_ | 1.024285 | -0.03462 | -0.03161 | 0.97563  | 0.63287  | DOWN | 637.4061 | 637.4029 |
| 9913 | M230T19  | 1.015761 | -0.02256 | -0.03094 | 0.976197 | 0.633005 | DOWN | 230.154  | 230.1535 |
| 9914 | M325T23_ | 1.011155 | 0.016004 | 0.03028  | 0.976586 | 0.633098 | UP   | 325.2391 | 325.2387 |
| 9915 | M206T30  | 1.017447 | -0.02495 | -0.03046 | 0.976605 | 0.633102 | DOWN | 206.0894 | 206.089  |
| 9916 | M594T27  | 1.019015 | 0.027175 | 0.029871 | 0.977205 | 0.633245 | UP   | 594.2496 | 594.2485 |

|      |          |          |          |          |          |          |      |          |          |
|------|----------|----------|----------|----------|----------|----------|------|----------|----------|
| 9917 | M1241T31 | 1.019845 | -0.02835 | -0.02949 | 0.977216 | 0.633248 | DOWN | 1240.561 | 1240.56  |
| 9918 | M385T20  | 1.014608 | 0.020922 | 0.029375 | 0.977377 | 0.633286 | UP   | 385.1676 | 385.1674 |
| 9919 | M455T27_ | 1.015588 | -0.02231 | -0.02897 | 0.97761  | 0.633341 | DOWN | 455.164  | 455.1636 |
| 9920 | M527T27  | 1.017845 | 0.025518 | 0.028642 | 0.977958 | 0.633424 | UP   | 527.1532 | 527.152  |
| 9921 | M354T29  | 1.021431 | 0.030591 | 0.028104 | 0.978416 | 0.633532 | UP   | 353.5927 | 353.5924 |
| 9922 | M583T34_ | 1.015072 | -0.02158 | -0.02783 | 0.978586 | 0.633573 | DOWN | 583.4683 | 583.4678 |
| 9923 | M164T2   | 1.031903 | 0.045307 | 0.028023 | 0.978657 | 0.63359  | UP   | 163.9764 | 163.9763 |
| 9924 | M476T23_ | 1.019424 | -0.02775 | -0.02779 | 0.978663 | 0.633591 | DOWN | 476.0276 | 476.0266 |
| 9925 | M650T21_ | 1.019408 | 0.027731 | 0.0272   | 0.978984 | 0.633667 | UP   | 650.4429 | 650.442  |
| 9926 | M312T23_ | 1.015841 | 0.022675 | 0.027292 | 0.97903  | 0.633678 | UP   | 312.0381 | 312.0376 |
| 9927 | M503T9_2 | 1.010064 | 0.014447 | 0.02709  | 0.979223 | 0.633724 | UP   | 503.3051 | 503.3027 |
| 9928 | M327T23_ | 1.010727 | 0.015393 | 0.026687 | 0.979373 | 0.63376  | UP   | 326.9952 | 326.9951 |
| 9929 | M298T22_ | 1.015065 | 0.021572 | 0.026907 | 0.979406 | 0.633767 | UP   | 298.2017 | 298.2012 |
| 9930 | M417T17_ | 1.019287 | 0.027561 | 0.027195 | 0.97943  | 0.633773 | UP   | 416.9934 | 416.9929 |
| 9931 | M438T33  | 1.011938 | -0.01712 | -0.02635 | 0.979623 | 0.633819 | DOWN | 438.1923 | 438.1918 |
| 9932 | M570T26  | 1.015789 | -0.0226  | -0.02638 | 0.979696 | 0.633836 | DOWN | 570.2334 | 570.2328 |
| 9933 | M410T9   | 1.022376 | 0.031926 | 0.026039 | 0.98001  | 0.63391  | UP   | 410.2353 | 410.2343 |
| 9934 | M260T23_ | 1.015692 | 0.022462 | 0.025956 | 0.980103 | 0.633932 | UP   | 260.1688 | 260.1682 |
| 9935 | M359T22_ | 1.013482 | -0.01932 | -0.02526 | 0.980516 | 0.63403  | DOWN | 359.3271 | 359.3264 |
| 9936 | M785T18  | 1.021203 | 0.03027  | 0.025337 | 0.980523 | 0.634032 | UP   | 785.2326 | 785.2323 |
| 9937 | M328T27_ | 1.015267 | 0.021859 | 0.025398 | 0.980542 | 0.634036 | UP   | 328.3001 | 328.2997 |
| 9938 | M469T22  | 1.019335 | 0.027629 | 0.024918 | 0.980927 | 0.634127 | UP   | 469.1184 | 469.118  |
| 9939 | M228T27  | 1.014743 | 0.021114 | 0.024768 | 0.980985 | 0.634141 | UP   | 228.1959 | 228.1954 |
| 9940 | M277T28_ | 1.01753  | -0.02507 | -0.02463 | 0.981138 | 0.634177 | DOWN | 277.0888 | 277.0884 |
| 9941 | M725T22  | 1.016085 | -0.02302 | -0.02411 | 0.981411 | 0.634242 | DOWN | 725.3437 | 725.343  |
| 9942 | M499T16  | 1.020606 | 0.029426 | 0.024072 | 0.9816   | 0.634287 | UP   | 499.1393 | 499.1392 |
| 9943 | M670T29  | 1.013269 | 0.019017 | 0.023739 | 0.981713 | 0.634313 | UP   | 670.2657 | 670.265  |
| 9944 | M650T11_ | 1.019354 | -0.02766 | -0.02382 | 0.981759 | 0.634324 | DOWN | 650.4194 | 650.4181 |
| 9945 | M343T18_ | 1.016646 | -0.02382 | -0.02369 | 0.981782 | 0.63433  | DOWN | 343.1574 | 343.1572 |
| 9946 | M552T11  | 1.016655 | 0.02383  | 0.023402 | 0.981943 | 0.634368 | UP   | 552.3627 | 552.3623 |
| 9947 | M535T21_ | 1.019177 | 0.027405 | 0.02321  | 0.982167 | 0.634421 | UP   | 535.0721 | 535.0711 |
| 9948 | M276T11  | 1.014736 | -0.0211  | -0.02252 | 0.982613 | 0.634526 | DOWN | 276.16   | 276.1592 |
| 9949 | M262T18  | 1.014319 | 0.020511 | 0.022426 | 0.982765 | 0.634562 | UP   | 262.0749 | 262.0746 |
| 9950 | M515T30_ | 1.002655 | -0.00382 | -0.02213 | 0.9829   | 0.634594 | DOWN | 515.3578 | 515.357  |
| 9951 | M463T10_ | 1.01067  | 0.015312 | 0.02207  | 0.982948 | 0.634605 | UP   | 463.1782 | 463.1769 |
| 9952 | M412T23_ | 1.013754 | 0.019708 | 0.022004 | 0.982999 | 0.634617 | UP   | 412.3272 | 412.3272 |
| 9953 | M386T11  | 1.015945 | 0.022822 | 0.022061 | 0.983007 | 0.634619 | UP   | 386.2025 | 386.2012 |
| 9954 | M232T22_ | 1.016896 | -0.02417 | -0.02202 | 0.983021 | 0.634622 | DOWN | 232.0716 | 232.0716 |
| 9955 | M341T32_ | 1.017256 | 0.024683 | 0.021774 | 0.983162 | 0.634655 | UP   | 340.7864 | 340.7859 |
| 9956 | M500T26  | 1.013356 | -0.01914 | -0.0214  | 0.983475 | 0.634729 | DOWN | 500.2773 | 500.2763 |
| 9957 | M399T44  | 1.007442 | 0.010697 | 0.021627 | 0.983579 | 0.634754 | UP   | 399.2133 | 399.2131 |
| 9958 | M554T22  | 1.016338 | 0.023381 | 0.021036 | 0.983906 | 0.634831 | UP   | 554.1703 | 554.1692 |
| 9959 | M528T32  | 1.010715 | 0.015377 | 0.020872 | 0.983946 | 0.63484  | UP   | 528.4017 | 528.4007 |
| 9960 | M619T31  | 1.011302 | 0.016214 | 0.020647 | 0.984038 | 0.634862 | UP   | 619.2492 | 619.2474 |
| 9961 | M596T11_ | 1.019576 | -0.02797 | -0.02065 | 0.984049 | 0.634864 | DOWN | 596.1954 | 596.1942 |
| 9962 | M308T26  | 1.014759 | -0.02114 | -0.02072 | 0.984196 | 0.634899 | DOWN | 308.1298 | 308.129  |
| 9963 | M241T32  | 1.006686 | 0.009614 | 0.020388 | 0.98426  | 0.634914 | UP   | 241.1799 | 241.1796 |

|       |          |          |          |          |          |          |      |          |          |
|-------|----------|----------|----------|----------|----------|----------|------|----------|----------|
| 9964  | M322T28  | 1.011799 | 0.016923 | 0.020399 | 0.984306 | 0.634925 | UP   | 322.2378 | 322.2373 |
| 9965  | M580T18  | 1.018105 | 0.025886 | 0.020392 | 0.984342 | 0.634933 | UP   | 580.2235 | 580.2225 |
| 9966  | M497T17  | 1.013535 | 0.019396 | 0.020523 | 0.984368 | 0.63494  | UP   | 497.0389 | 497.0382 |
| 9967  | M171T17  | 1.004862 | -0.007   | -0.02036 | 0.984382 | 0.634943 | DOWN | 171.138  | 171.1377 |
| 9968  | M407T22  | 1.011586 | -0.01662 | -0.01981 | 0.984743 | 0.635028 | DOWN | 407.1322 | 407.1313 |
| 9969  | M439T33  | 1.011382 | -0.01633 | -0.0196  | 0.984896 | 0.635064 | DOWN | 439.1891 | 439.1884 |
| 9970  | M584T18  | 1.014608 | 0.020922 | 0.019448 | 0.985079 | 0.635107 | UP   | 584.2178 | 584.2172 |
| 9971  | M1178T11 | 1.017468 | -0.02498 | -0.01936 | 0.985116 | 0.635116 | DOWN | 1177.536 | 1177.533 |
| 9972  | M623T18  | 1.017391 | 0.024874 | 0.019354 | 0.985136 | 0.63512  | UP   | 623.2455 | 623.2444 |
| 9973  | M539T25  | 1.019591 | -0.02799 | -0.01913 | 0.985203 | 0.635136 | DOWN | 539.4352 | 539.4341 |
| 9974  | M692T10  | 1.012333 | -0.01768 | -0.01891 | 0.985461 | 0.635197 | DOWN | 691.5068 | 691.5053 |
| 9975  | M847T22  | 1.015593 | 0.022322 | 0.018872 | 0.985526 | 0.635212 | UP   | 847.106  | 847.1058 |
| 9976  | M549T27  | 1.011191 | 0.01708  | 0.01854  | 0.985892 | 0.635298 | UP   | 549.2471 | 549.2465 |
| 9977  | M551T11  | 1.014164 | 0.020292 | 0.017969 | 0.986108 | 0.635349 | UP   | 551.1477 | 551.146  |
| 9978  | M499T11_ | 1.011468 | -0.01645 | -0.01819 | 0.986112 | 0.63535  | DOWN | 499.3574 | 499.3568 |
| 9979  | M316T17  | 1.012302 | 0.01764  | 0.018103 | 0.986122 | 0.635352 | UP   | 315.9835 | 315.983  |
| 9980  | M350T17  | 1.012309 | -0.01765 | -0.01741 | 0.98675  | 0.6355   | DOWN | 350.1052 | 350.1043 |
| 9981  | M306T24  | 1.00764  | 0.01098  | 0.017176 | 0.9868   | 0.635511 | UP   | 305.8313 | 305.831  |
| 9982  | M315T23_ | 1.009635 | -0.01383 | -0.01707 | 0.986899 | 0.635535 | DOWN | 315.328  | 315.3276 |
| 9983  | M471T22  | 1.013371 | -0.01916 | -0.01593 | 0.987814 | 0.635749 | DOWN | 471.1135 | 471.1127 |
| 9984  | M1156T30 | 1.009312 | 0.013372 | 0.015532 | 0.988046 | 0.635804 | UP   | 1155.528 | 1155.527 |
| 9985  | M637T27  | 1.009592 | -0.01377 | -0.01536 | 0.98821  | 0.635842 | DOWN | 637.271  | 637.2706 |
| 9986  | M534T7   | 1.017518 | 0.025054 | 0.015037 | 0.988381 | 0.635882 | UP   | 534.2872 | 534.2866 |
| 9987  | M620T25  | 1.00714  | 0.010264 | 0.015208 | 0.988479 | 0.635905 | UP   | 620.2923 | 620.2913 |
| 9988  | M513T22_ | 1.012559 | -0.01801 | -0.01505 | 0.988483 | 0.635906 | DOWN | 513.1433 | 513.1429 |
| 9989  | M591T23  | 1.009614 | -0.0138  | -0.01475 | 0.988737 | 0.635965 | DOWN | 590.9555 | 590.9549 |
| 9990  | M347T32_ | 1.008349 | 0.011995 | 0.014465 | 0.988879 | 0.635999 | UP   | 347.118  | 347.1174 |
| 9991  | M274T32_ | 1.014989 | -0.02146 | -0.01432 | 0.988973 | 0.636021 | DOWN | 274.2573 | 274.257  |
| 9992  | M456T9_1 | 1.00754  | 0.010838 | 0.013938 | 0.98925  | 0.636085 | UP   | 455.5919 | 455.5902 |
| 9993  | M610T29_ | 1.008817 | -0.01266 | -0.01343 | 0.989656 | 0.63618  | DOWN | 610.2593 | 610.2489 |
| 9994  | M552T24_ | 1.00786  | 0.011295 | 0.013363 | 0.989733 | 0.636198 | UP   | 552.2229 | 552.2217 |
| 9995  | M288T22_ | 1.006854 | 0.009855 | 0.013126 | 0.989852 | 0.636226 | UP   | 288.0851 | 288.0848 |
| 9996  | M563T24  | 1.021496 | -0.03068 | -0.01319 | 0.989962 | 0.636252 | DOWN | 563.123  | 563.1222 |
| 9997  | M464T23_ | 1.005554 | 0.00799  | 0.012923 | 0.990033 | 0.636269 | UP   | 464.2278 | 464.2274 |
| 9998  | M522T31_ | 1.005894 | -0.00848 | -0.01283 | 0.990093 | 0.636283 | DOWN | 522.3555 | 522.3547 |
| 9999  | M316T35  | 1.005938 | -0.00854 | -0.01283 | 0.990114 | 0.636288 | DOWN | 316.1782 | 316.1778 |
| 10000 | M341T24  | 1.00557  | 0.008014 | 0.012803 | 0.990149 | 0.636296 | UP   | 341.3165 | 341.3158 |
| 10001 | M379T31_ | 1.016058 | -0.02298 | -0.01267 | 0.990199 | 0.636307 | DOWN | 379.0729 | 379.0726 |
| 10002 | M239T21  | 1.00619  | 0.008903 | 0.012662 | 0.990208 | 0.63631  | UP   | 239.162  | 239.1614 |
| 10003 | M648T43_ | 1.003135 | -0.00452 | -0.01275 | 0.990373 | 0.636348 | DOWN | 647.9434 | 647.9426 |
| 10004 | M272T26  | 1.007614 | 0.010944 | 0.012423 | 0.990527 | 0.636384 | UP   | 272.0955 | 272.0953 |
| 10005 | M396T44  | 1.003769 | 0.005427 | 0.012233 | 0.990745 | 0.636435 | UP   | 396.2233 | 396.2224 |
| 10006 | M205T30  | 1.006532 | 0.009393 | 0.012033 | 0.990761 | 0.636439 | UP   | 205.086  | 205.0856 |
| 10007 | M578T10  | 1.009306 | -0.01336 | -0.01176 | 0.990972 | 0.636488 | DOWN | 577.921  | 577.9191 |
| 10008 | M335T30  | 1.005724 | -0.00824 | -0.01138 | 0.991206 | 0.636543 | DOWN | 335.1255 | 335.125  |
| 10009 | M549T31  | 1.008917 | 0.012808 | 0.011152 | 0.991406 | 0.636589 | UP   | 548.8091 | 548.8085 |
| 10010 | M379T31_ | 1.0053   | 0.007626 | 0.011012 | 0.991495 | 0.63661  | UP   | 379.2519 | 379.2516 |

|       |          |          |          |          |          |          |      |          |          |
|-------|----------|----------|----------|----------|----------|----------|------|----------|----------|
| 10011 | M494T28_ | 1.005114 | -0.00736 | -0.01087 | 0.99163  | 0.636642 | DOWN | 494.3243 | 494.3233 |
| 10012 | M219T28  | 1.004861 | -0.007   | -0.01085 | 0.991654 | 0.636647 | DOWN | 219.1381 | 219.1379 |
| 10013 | M292T35  | 1.0061   | 0.008774 | 0.010748 | 0.991738 | 0.636667 | UP   | 292.2848 | 292.2842 |
| 10014 | M650T21_ | 1.007311 | 0.010509 | 0.010375 | 0.991988 | 0.636725 | UP   | 650.443  | 650.4409 |
| 10015 | M401T27  | 1.006433 | 0.009251 | 0.010426 | 0.99199  | 0.636725 | UP   | 401.365  | 401.3642 |
| 10016 | M354T44  | 1.004544 | 0.006541 | 0.01058  | 0.992044 | 0.636738 | UP   | 354.1939 | 354.1933 |
| 10017 | M572T28  | 1.007182 | -0.01032 | -0.01034 | 0.992047 | 0.636739 | DOWN | 572.386  | 572.3856 |
| 10018 | M419T40  | 1.003811 | 0.005488 | 0.01018  | 0.992128 | 0.636758 | UP   | 419.3204 | 419.3199 |
| 10019 | M516T34  | 1.003403 | 0.004901 | 0.010041 | 0.992279 | 0.636793 | UP   | 516.3532 | 516.3525 |
| 10020 | M151T31_ | 1.004275 | 0.006154 | 0.009909 | 0.992346 | 0.636808 | UP   | 151.0275 | 151.0274 |
| 10021 | M223T43  | 1.002933 | 0.004225 | 0.009889 | 0.992353 | 0.63681  | UP   | 223.0636 | 223.0632 |
| 10022 | M416T19_ | 1.006745 | -0.0097  | -0.00991 | 0.992368 | 0.636814 | DOWN | 416.0474 | 416.0471 |
| 10023 | M689T37_ | 1.004554 | 0.006555 | 0.009407 | 0.992763 | 0.636906 | UP   | 689.2815 | 689.281  |
| 10024 | M299T11_ | 1.007488 | 0.010763 | 0.00916  | 0.992922 | 0.636943 | UP   | 299.1106 | 299.1102 |
| 10025 | M494T18_ | 1.003078 | 0.004434 | 0.009076 | 0.992981 | 0.636956 | UP   | 494.3099 | 494.3093 |
| 10026 | M597T30  | 1.006419 | -0.00923 | -0.00903 | 0.993036 | 0.636969 | DOWN | 597.3156 | 597.3146 |
| 10027 | M399T11_ | 1.007439 | 0.010692 | 0.008325 | 0.993608 | 0.637102 | UP   | 398.9944 | 398.9939 |
| 10028 | M449T24_ | 1.006809 | -0.00979 | -0.00826 | 0.993673 | 0.637118 | DOWN | 449.3742 | 449.374  |
| 10029 | M589T11_ | 1.004842 | -0.00697 | -0.00793 | 0.993895 | 0.637169 | DOWN | 589.4247 | 589.424  |
| 10030 | M543T7   | 1.008835 | -0.01269 | -0.00741 | 0.994273 | 0.637257 | DOWN | 543.3127 | 543.3121 |
| 10031 | M477T25  | 1.004481 | -0.00645 | -0.00743 | 0.994309 | 0.637265 | DOWN | 477.3112 | 477.3104 |
| 10032 | M528T44_ | 1.001182 | -0.0017  | -0.00716 | 0.99447  | 0.637303 | DOWN | 527.8899 | 527.8895 |
| 10033 | M708T35  | 1.005102 | -0.00734 | -0.00709 | 0.994607 | 0.637335 | DOWN | 707.5938 | 707.5925 |
| 10034 | M373T43  | 1.002227 | 0.00321  | 0.006765 | 0.99477  | 0.637373 | UP   | 373.098  | 373.0974 |
| 10035 | M802T23  | 1.007406 | -0.01064 | -0.00653 | 0.994977 | 0.637421 | DOWN | 801.5546 | 801.5542 |
| 10036 | M403T13  | 1.006492 | -0.00934 | -0.00635 | 0.995163 | 0.637464 | DOWN | 403.0843 | 403.0838 |
| 10037 | M527T17  | 1.007107 | -0.01022 | -0.00614 | 0.995302 | 0.637496 | DOWN | 527.1115 | 527.1111 |
| 10038 | M564T23_ | 1.006878 | -0.00989 | -0.00554 | 0.995714 | 0.637592 | DOWN | 563.9236 | 563.923  |
| 10039 | M597T36  | 1.002321 | -0.00335 | -0.00517 | 0.996007 | 0.63766  | DOWN | 597.3457 | 597.3452 |
| 10040 | M454T37  | 1.001812 | 0.002612 | 0.004742 | 0.996372 | 0.637744 | UP   | 454.4254 | 454.4247 |
| 10041 | M740T26  | 1.000927 | -0.00134 | -0.00467 | 0.996415 | 0.637754 | DOWN | 740.1974 | 740.1964 |
| 10042 | M462T27  | 1.002515 | 0.003624 | 0.004603 | 0.996468 | 0.637767 | UP   | 462.3772 | 462.3765 |
| 10043 | M522T32_ | 1.004265 | -0.00614 | -0.0046  | 0.996486 | 0.637771 | DOWN | 522.4254 | 522.4216 |
| 10044 | M453T9_3 | 1.001827 | -0.00263 | -0.00383 | 0.99705  | 0.637901 | DOWN | 452.8966 | 452.8953 |
| 10045 | M457T9_2 | 1.001687 | 0.002432 | 0.00313  | 0.997592 | 0.638027 | UP   | 456.6025 | 456.6008 |
| 10046 | M200T33_ | 1.001748 | -0.00252 | -0.0031  | 0.997613 | 0.638032 | DOWN | 200.1362 | 200.1358 |
| 10047 | M199T18_ | 1.001346 | -0.00194 | -0.00309 | 0.997628 | 0.638035 | DOWN | 199.0418 | 199.0418 |
| 10048 | M228T16_ | 1.001907 | -0.00275 | -0.0027  | 0.997918 | 0.638103 | DOWN | 228.196  | 228.1955 |
| 10049 | M273T32_ | 1.002507 | -0.00361 | -0.00237 | 0.99819  | 0.638165 | DOWN | 273.2357 | 273.2347 |
| 10050 | M390T22_ | 1.002048 | -0.00295 | -0.00227 | 0.998244 | 0.638178 | DOWN | 389.9861 | 389.9856 |
| 10051 | M172T23  | 1.001096 | -0.00158 | -0.002   | 0.998466 | 0.638229 | DOWN | 172.1696 | 172.1693 |
| 10052 | M528T29_ | 1.001196 | 0.001724 | 0.001858 | 0.998565 | 0.638252 | UP   | 528.3084 | 528.3072 |
| 10053 | M275T34  | 1.001059 | 0.001526 | 0.001835 | 0.998588 | 0.638258 | UP   | 275.2582 | 275.2579 |
| 10054 | M256T38  | 1.000758 | 0.001093 | 0.001766 | 0.998634 | 0.638268 | UP   | 256.2635 | 256.263  |
| 10055 | M379T30_ | 1.001696 | 0.002445 | 0.001784 | 0.998643 | 0.63827  | UP   | 379.0839 | 379.0835 |
| 10056 | M380T39_ | 1.001051 | -0.00152 | -0.00153 | 0.998821 | 0.638311 | DOWN | 380.2414 | 380.2407 |
| 10057 | M487T42  | 1.000127 | 0.000183 | 0.001009 | 0.999219 | 0.638403 | UP   | 487.1293 | 487.1281 |

|       |          |          |          |          |          |          |      |          |          |
|-------|----------|----------|----------|----------|----------|----------|------|----------|----------|
| 10058 | M265T9   | 1.001039 | -0.0015  | -0.00097 | 0.999256 | 0.638412 | DOWN | 265.0662 | 265.0628 |
| 10059 | M276T35  | 1.000505 | -0.00073 | -0.00086 | 0.999341 | 0.638432 | DOWN | 276.2615 | 276.261  |
| 10060 | M609T9   | 1.00068  | 0.000981 | 0.000812 | 0.999376 | 0.63844  | UP   | 609.3893 | 609.3874 |
| 10061 | M341T10_ | 1.000629 | 0.000907 | 0.00075  | 0.999433 | 0.638453 | UP   | 340.7519 | 340.7506 |
| 10062 | M303T10  | 1.000372 | 0.000536 | 0.000618 | 0.999522 | 0.638473 | UP   | 303.228  | 303.2277 |
| 10063 | M454T27_ | 1.000319 | -0.00046 | -0.00059 | 0.999547 | 0.638479 | DOWN | 454.172  | 454.1715 |
| 10064 | M757T18  | 1.000215 | -0.00031 | 0.0004   | 0.999693 | 0.638513 | DOWN | 757.238  | 757.2377 |
| 10065 | M357T30  | 1.000076 | 0.000109 | 0.000377 | 0.999709 | 0.638516 | UP   | 357.283  | 357.2824 |
| 10066 | M541T18  | 1.000323 | 0.000466 | 0.00036  | 0.999724 | 0.63852  | UP   | 541.1919 | 541.1916 |
| 10067 | M390T11  | 1.000284 | 0.000409 | 0.000346 | 0.999736 | 0.638523 | UP   | 390.1773 | 390.1769 |
| 10068 | M374T43  | 1.000139 | -0.0002  | -0.00031 | 0.999758 | 0.638528 | DOWN | 374.0974 | 374.0967 |

| mzmax    | rtmed    | rtmin    | rtmax    | npeaks | DMSO | 11oxoETE | maxint   | mean1    | sd1      |
|----------|----------|----------|----------|--------|------|----------|----------|----------|----------|
| 358.0996 | 16.71508 | 16.68717 | 16.74017 | 4      | 3    | 1        | 41967.57 | 379817.8 | 42190.47 |
| 407.1373 | 31.58267 | 31.57267 | 31.6005  | 3      | 3    | 0        | 22252.52 | 74635.88 | 9147.343 |
| 560.0807 | 31.32925 | 31.30467 | 31.37217 | 4      | 0    | 4        | 106097.1 | 79929.22 | 60185.99 |
| 584.9483 | 26.181   | 26.14917 | 26.21417 | 5      | 1    | 4        | 54450.72 | 93786.19 | 145642.2 |
| 308.8999 | 2.176733 | 2.119783 | 2.425817 | 7      | 4    | 3        | 206307.8 | 1507826  | 787540.2 |
| 327.0965 | 20.42567 | 20.3935  | 20.45367 | 4      | 3    | 1        | 49836.26 | 354783.4 | 90623.82 |
| 362.095  | 16.724   | 16.68717 | 16.73067 | 3      | 3    | 0        | 14564.04 | 90414.75 | 28272.6  |
| 172.977  | 2.120333 | 2.032667 | 2.175667 | 7      | 4    | 3        | 978123.3 | 5726957  | 1519336  |
| 335.0942 | 30.82075 | 30.74767 | 30.84933 | 4      | 1    | 3        | 57742.78 | 377174.5 | 80950.9  |
| 424.0413 | 19.34133 | 19.32817 | 19.36583 | 4      | 4    | 0        | 34684.41 | 123070.4 | 39170.22 |
| 492.3451 | 24.10575 | 23.9675  | 24.15    | 4      | 1    | 3        | 47568.53 | 370341.4 | 85852.15 |
| 197.1173 | 12.11403 | 12.10555 | 12.29612 | 3      | 0    | 3        | 186469.6 | 285031   | 124762.4 |
| 1005.496 | 43.58967 | 43.5575  | 43.68883 | 5      | 2    | 3        | 46069.23 | 54209.46 | 63730.05 |
| 172.9772 | 2.802033 | 2.7014   | 3.001233 | 5      | 1    | 4        | 934470.1 | 4521756  | 701451.8 |
| 192.008  | 2.78495  | 2.7296   | 2.806883 | 3      | 0    | 3        | 206169.4 | 2371887  | 798220.2 |
| 1150.807 | 43.573   | 43.57267 | 43.57467 | 3      | 0    | 3        | 45103.1  | 17925.81 | 20256.55 |
| 486.8265 | 29.6365  | 29.60833 | 29.712   | 3      | 3    | 0        | 38452.79 | 95509.03 | 16814.58 |
| 517.235  | 18.86433 | 18.775   | 18.87883 | 3      | 0    | 3        | 32187.47 | 24391.41 | 21266.89 |
| 378.1776 | 18.4175  | 18.38683 | 18.426   | 4      | 1    | 3        | 43838.67 | 262219.4 | 48873.19 |
| 360.0966 | 16.71117 | 16.67067 | 16.73067 | 4      | 4    | 0        | 24384.34 | 158741.6 | 61062.7  |
| 598.0861 | 42.03583 | 41.9805  | 42.07    | 3      | 3    | 0        | 27828.02 | 86793.4  | 28459.73 |
| 480.348  | 42.96475 | 42.90883 | 42.988   | 10     | 5    | 5        | 152317.9 | 1130088  | 121202.3 |
| 787.2692 | 43.61683 | 43.572   | 43.64667 | 7      | 2    | 5        | 208252.7 | 608631.5 | 864873.4 |
| 284.1639 | 2.785792 | 2.7201   | 3.009133 | 4      | 3    | 0        | 77892.82 | 1549218  | 617418.3 |
| 325.0997 | 20.43975 | 20.3965  | 20.55133 | 6      | 4    | 2        | 100186.6 | 709270.5 | 244862   |
| 708.18   | 30.96433 | 30.93717 | 31.06583 | 8      | 5    | 3        | 124570.3 | 962338.9 | 320528.2 |
| 390.967  | 43.59758 | 43.58717 | 43.63067 | 4      | 1    | 3        | 27177.19 | 28320.2  | 36806.27 |
| 322.2463 | 26.308   | 26.0605  | 26.586   | 5      | 1    | 4        | 82567.23 | 929898.8 | 238612.1 |
| 917.6019 | 43.602   | 43.572   | 43.63067 | 7      | 2    | 5        | 122706.7 | 144866   | 173826.3 |
| 1208.744 | 43.60167 | 43.54483 | 43.63067 | 7      | 2    | 5        | 114536   | 134912.9 | 183141.7 |
| 408.1554 | 35.54267 | 35.53    | 35.666   | 3      | 0    | 3        | 113764   | 1160774  | 396375.3 |
| 784.1782 | 29.12433 | 29.09583 | 29.1395  | 3      | 3    | 0        | 39576.88 | 212279.4 | 55424.03 |
| 191.1431 | 31.61992 | 31.55617 | 31.722   | 8      | 3    | 5        | 170304.4 | 711015.5 | 610734.9 |
| 362.0008 | 16.96092 | 16.93667 | 16.96917 | 6      | 5    | 1        | 67974.87 | 435911   | 164347.1 |
| 243.1231 | 10.94645 | 10.85507 | 11.09677 | 3      | 0    | 3        | 142742.3 | 36295.35 | 23645.99 |
| 224.0633 | 24.96183 | 24.89183 | 24.98883 | 5      | 4    | 1        | 20658.11 | 92955.81 | 16092.49 |
| 722.5062 | 32.83233 | 32.77633 | 32.87517 | 10     | 5    | 5        | 2517831  | 18108038 | 14472442 |
| 449.1561 | 28.75517 | 28.65183 | 28.87967 | 8      | 3    | 5        | 504237.3 | 5775995  | 4151374  |
| 466.1609 | 20.62517 | 20.3645  | 20.632   | 6      | 5    | 1        | 69368.63 | 491924.6 | 201874.2 |
| 333.2429 | 28.944   | 28.908   | 28.951   | 3      | 0    | 3        | 591018.3 | 56760.4  | 32268.23 |
| 385.1829 | 30.27067 | 30.25883 | 30.39033 | 4      | 1    | 3        | 30351.33 | 213946.4 | 46320.74 |
| 388.2447 | 30.03983 | 29.943   | 30.0755  | 8      | 3    | 5        | 64729.71 | 240526.5 | 100939.6 |
| 438.1868 | 38.8975  | 38.8755  | 38.9125  | 3      | 0    | 3        | 61293.86 | 413481.7 | 111874.6 |
| 278.1966 | 25.11067 | 25.06783 | 25.1385  | 4      | 1    | 3        | 58193.35 | 504914.6 | 182196.6 |
| 501.1788 | 21.903   | 21.7995  | 22.21683 | 5      | 1    | 4        | 113930   | 58628.59 | 42083.43 |
| 361.1906 | 43.61092 | 43.42583 | 43.649   | 4      | 3    | 1        | 44579.31 | 578747   | 200565.4 |



|          |          |          |          |    |   |   |          |          |          |
|----------|----------|----------|----------|----|---|---|----------|----------|----------|
| 661.4615 | 43.31525 | 43.293   | 43.3515  | 6  | 2 | 4 | 96307.02 | 214080.1 | 260794.1 |
| 646.4023 | 11.45768 | 11.42465 | 11.64007 | 4  | 0 | 4 | 76809.29 | 32179.11 | 47722.26 |
| 320.9743 | 16.94292 | 16.88917 | 17.002   | 10 | 5 | 5 | 195386.9 | 1381765  | 573538.5 |
| 524.1403 | 44.322   | 44.06467 | 44.337   | 5  | 1 | 3 | 138192.4 | 173075.4 | 315411   |
| 422.0427 | 19.35617 | 19.33033 | 19.37883 | 5  | 4 | 1 | 47680.39 | 226801.3 | 103196.9 |
| 590.4271 | 33.06233 | 32.98233 | 33.10267 | 10 | 5 | 5 | 4264278  | 16711299 | 14811922 |
| 498.1241 | 43.60817 | 43.53017 | 43.68883 | 7  | 2 | 5 | 1334442  | 5389326  | 8785553  |
| 284.2093 | 31.32908 | 31.32867 | 31.33233 | 4  | 0 | 4 | 68267.55 | 34199.13 | 21408.9  |
| 311.1672 | 43.59567 | 43.572   | 43.6025  | 8  | 3 | 5 | 333040.8 | 1751575  | 1721244  |
| 788.1743 | 29.12583 | 29.08283 | 29.1395  | 3  | 3 | 0 | 57999.3  | 171748.8 | 73671.79 |
| 201.0084 | 2.744025 | 2.7252   | 2.837    | 4  | 0 | 4 | 359439.7 | 2743001  | 265651.4 |
| 230.89   | 2.504067 | 2.471067 | 2.526517 | 3  | 0 | 3 | 160300.5 | 1279307  | 169902.9 |
| 263.0819 | 22.12067 | 22.08617 | 22.142   | 4  | 4 | 0 | 50170.38 | 239194   | 101878.1 |
| 635.4568 | 32.98558 | 32.908   | 33.02217 | 10 | 5 | 5 | 1488103  | 6015407  | 4997647  |
| 352.1963 | 43.58733 | 43.4175  | 43.60467 | 10 | 4 | 5 | 2475781  | 12867806 | 13634341 |
| 679.4833 | 32.90267 | 32.83483 | 32.94583 | 10 | 5 | 5 | 1219016  | 7079943  | 6066399  |
| 394.2236 | 43.58717 | 43.5575  | 43.60183 | 9  | 4 | 5 | 1591605  | 6931380  | 7270863  |
| 391.2958 | 37.03517 | 37.0065  | 37.06383 | 3  | 0 | 3 | 177570.9 | 2409842  | 416927.7 |
| 534.9294 | 25.69158 | 25.64467 | 25.71367 | 4  | 1 | 3 | 47963.7  | 49292.3  | 82096.68 |
| 179.1069 | 15.88578 | 15.85927 | 15.90992 | 4  | 0 | 4 | 172396.6 | 290832.7 | 72717.32 |
| 409.1175 | 20.62233 | 20.58467 | 20.686   | 5  | 4 | 1 | 61366.55 | 291378.5 | 128377.9 |
| 266.0744 | 22.10975 | 22.05267 | 22.136   | 6  | 4 | 2 | 167722.7 | 1084177  | 474345.8 |
| 634.4534 | 32.98775 | 32.93167 | 33.00717 | 10 | 5 | 5 | 4093137  | 20143375 | 17588626 |
| 351.1622 | 28.96917 | 28.93633 | 28.97417 | 4  | 0 | 4 | 69211.59 | 107877.3 | 26472.22 |
| 291.2322 | 33.13417 | 33.125   | 33.15717 | 3  | 0 | 3 | 177745.2 | 1197506  | 1006163  |
| 264.0755 | 22.11583 | 22.06433 | 22.1365  | 9  | 5 | 4 | 301385.7 | 1806063  | 828671.5 |
| 548.3802 | 36.18658 | 36.16633 | 36.2475  | 10 | 5 | 5 | 188995.8 | 1549775  | 557881.8 |
| 318.1931 | 21.66417 | 21.557   | 21.667   | 5  | 2 | 3 | 126793   | 1018699  | 271433.1 |
| 463.175  | 20.63733 | 20.5745  | 20.6425  | 3  | 3 | 0 | 43633.63 | 217438.3 | 98042.24 |
| 549.3835 | 36.18567 | 36.16633 | 36.2025  | 6  | 3 | 3 | 56282.9  | 353724.2 | 138505.4 |
| 420.0464 | 19.3495  | 19.326   | 19.37183 | 7  | 5 | 2 | 76418.6  | 481815   | 153941.7 |
| 300.144  | 30.96167 | 30.93633 | 31.07383 | 9  | 4 | 5 | 203196   | 1647804  | 680697.9 |
| 607.435  | 43.60167 | 43.578   | 43.6635  | 7  | 2 | 5 | 149444.4 | 523024.9 | 366947.4 |
| 514.2325 | 20.40733 | 20.3615  | 20.4155  | 5  | 5 | 0 | 53282.85 | 264270.8 | 129049.9 |
| 546.4006 | 33.139   | 33.09783 | 33.16417 | 10 | 5 | 5 | 3750511  | 13573231 | 12411569 |
| 383.2527 | 21.6285  | 21.4985  | 21.6545  | 3  | 0 | 3 | 61354.79 | 184289.9 | 272569.6 |
| 678.4798 | 32.90583 | 32.8495  | 32.94183 | 10 | 5 | 5 | 3265750  | 20727930 | 19074302 |
| 363.2171 | 22.51933 | 22.47367 | 22.5475  | 5  | 0 | 5 | 2156660  | 195417.3 | 42383.76 |
| 502.2285 | 44.85567 | 44.7795  | 44.97467 | 5  | 1 | 3 | 34481.48 | 70397.61 | 73336.57 |
| 602.2438 | 27.45517 | 27.441   | 27.472   | 5  | 4 | 1 | 91932.96 | 642922.9 | 319299.5 |
| 540.1542 | 43.61733 | 43.6045  | 43.64533 | 3  | 0 | 3 | 195853.6 | 638741.3 | 911621.6 |
| 556.2378 | 27.47158 | 27.45517 | 27.74617 | 4  | 3 | 1 | 60650.07 | 446121.4 | 217121.4 |
| 262.0787 | 22.11733 | 22.05267 | 22.14983 | 10 | 5 | 5 | 572594.9 | 3514571  | 1638851  |
| 683.4745 | 43.20433 | 43.15933 | 43.2475  | 4  | 1 | 3 | 100687.7 | 225990   | 264693   |
| 661.4532 | 32.88867 | 32.83483 | 32.93333 | 7  | 3 | 4 | 108199.5 | 541282.4 | 518887.3 |
| 425.1309 | 20.95283 | 20.817   | 21.0525  | 9  | 5 | 3 | 312464.8 | 1757353  | 777452.2 |
| 495.6922 | 42.79967 | 42.77383 | 42.88067 | 7  | 4 | 3 | 50593.75 | 424562.3 | 29730.18 |

|          |          |          |          |    |   |   |          |          |          |
|----------|----------|----------|----------|----|---|---|----------|----------|----------|
| 997.5055 | 43.58667 | 43.57283 | 43.61617 | 7  | 2 | 5 | 202614.8 | 426769.3 | 577117.4 |
| 353.1971 | 43.60167 | 43.578   | 43.61567 | 7  | 2 | 5 | 449025.9 | 2050244  | 2102144  |
| 452.1731 | 38.86367 | 38.85333 | 38.9125  | 3  | 0 | 3 | 125558.2 | 1066549  | 384068.3 |
| 290.2199 | 35.6295  | 35.56183 | 35.68083 | 4  | 0 | 4 | 93032.16 | 1526186  | 380030.6 |
| 627.2439 | 30.94733 | 30.93717 | 30.95817 | 3  | 3 | 0 | 58247.98 | 306485.3 | 148525.5 |
| 735.3207 | 43.60167 | 43.54333 | 43.65967 | 5  | 1 | 4 | 116888.5 | 276787.1 | 262234.3 |
| 597.1089 | 30.9075  | 30.90283 | 30.92267 | 3  | 0 | 3 | 40042.99 | 3355.022 | 7502.058 |
| 380.2074 | 32.23883 | 32.2365  | 32.2625  | 3  | 0 | 3 | 118067.6 | 1093232  | 421320.8 |
| 636.4599 | 32.989   | 32.95233 | 33.005   | 7  | 2 | 5 | 252472.6 | 1024429  | 891973.2 |
| 499.1867 | 5.733817 | 5.61735  | 5.923417 | 3  | 3 | 0 | 329018.5 | 3367285  | 1467348  |
| 775.2397 | 43.61617 | 43.563   | 43.61733 | 3  | 0 | 3 | 51245.54 | 83497.51 | 163736.4 |
| 591.4304 | 33.04725 | 32.99717 | 33.09183 | 10 | 5 | 5 | 1435609  | 4795074  | 3994428  |
| 411.116  | 20.62517 | 20.5745  | 20.91917 | 6  | 5 | 0 | 37266.16 | 166135.8 | 76422.98 |
| 918.5958 | 43.59567 | 43.578   | 43.61717 | 8  | 3 | 5 | 1262423  | 1736291  | 2369934  |
| 426.1343 | 20.988   | 20.94567 | 21.008   | 3  | 3 | 0 | 65874.25 | 282144.9 | 124299.7 |
| 300.1812 | 19.22708 | 19.205   | 19.247   | 4  | 0 | 4 | 94706.51 | 139567.6 | 51565.68 |
| 447.1676 | 29.559   | 29.52033 | 29.59333 | 4  | 0 | 4 | 54313.28 | 24525.66 | 7255.978 |
| 919.5988 | 43.60117 | 43.578   | 43.602   | 7  | 2 | 5 | 727096.9 | 1005664  | 1363185  |
| 211.1333 | 15.87585 | 15.85927 | 15.8805  | 5  | 0 | 5 | 487423.9 | 233155.5 | 81673.04 |
| 630.9691 | 28.7325  | 28.72767 | 28.84867 | 3  | 0 | 3 | 142332.7 | 657461   | 1373509  |
| 267.1597 | 17.2765  | 17.25317 | 17.31033 | 4  | 0 | 4 | 453868.2 | 312748.1 | 79972.22 |
| 708.36   | 43.58783 | 43.578   | 43.602   | 7  | 2 | 5 | 1096974  | 2219011  | 2847150  |
| 363.7902 | 2.58765  | 2.504067 | 2.749083 | 3  | 0 | 3 | 394781.5 | 277956.4 | 111554.6 |
| 391.1571 | 25.13117 | 25.12367 | 25.14167 | 3  | 0 | 3 | 568195.4 | 49536.95 | 18343.79 |
| 521.0767 | 31.34333 | 31.31517 | 31.36317 | 5  | 0 | 5 | 303624.7 | 14631.84 | 3835.324 |
| 608.4346 | 43.60167 | 43.563   | 43.6335  | 9  | 4 | 5 | 1535544  | 4690672  | 4746162  |
| 161.9611 | 2.849533 | 2.837    | 3.1623   | 4  | 1 | 3 | 132981   | 39315.09 | 30497.68 |
| 609.2576 | 30.95383 | 30.93717 | 30.96167 | 4  | 4 | 0 | 161204.5 | 913246.6 | 476315.2 |
| 174.9564 | 2.82195  | 2.733017 | 2.846317 | 3  | 0 | 3 | 64737.18 | 59787.75 | 42050.18 |
| 307.101  | 22.11417 | 22.03667 | 22.15117 | 8  | 5 | 3 | 189272.2 | 1204813  | 580939.2 |
| 391.2251 | 43.58875 | 43.578   | 43.61683 | 8  | 3 | 5 | 394580.9 | 1713389  | 1880589  |
| 296.2306 | 31.19525 | 31.18767 | 31.19817 | 4  | 0 | 4 | 69712.48 | 46479.41 | 34185.96 |
| 450.1659 | 29.55892 | 29.52033 | 29.59333 | 4  | 0 | 4 | 172899   | 253913.7 | 125438.4 |
| 709.3631 | 43.6025  | 43.563   | 43.63067 | 7  | 2 | 5 | 458362.6 | 961170.5 | 1232457  |
| 350.1776 | 39.85442 | 39.7855  | 39.89233 | 4  | 0 | 4 | 46735.97 | 596853   | 135364.8 |
| 229.1439 | 15.87585 | 15.85927 | 15.8953  | 5  | 0 | 5 | 810072.9 | 210214.6 | 102437.2 |
| 265.1439 | 15.41007 | 15.39463 | 15.43913 | 4  | 0 | 4 | 132726.1 | 90361.27 | 49563.58 |
| 609.438  | 43.59567 | 43.578   | 43.6025  | 8  | 3 | 5 | 484393.1 | 1582222  | 1570038  |
| 407.152  | 24.01367 | 24.00033 | 24.03283 | 5  | 0 | 5 | 1434914  | 75093.41 | 14398.03 |
| 561.998  | 32.11775 | 32.04317 | 32.146   | 4  | 1 | 3 | 40876.29 | 43693.19 | 77968.14 |
| 303.1052 | 22.11417 | 22.03667 | 22.1335  | 8  | 5 | 3 | 627086.8 | 3910626  | 1938010  |
| 427.1277 | 20.9435  | 20.8315  | 21.0525  | 6  | 5 | 1 | 100167.9 | 826011.7 | 398766.1 |
| 337.2382 | 20.59867 | 20.5825  | 20.65633 | 3  | 0 | 3 | 438054.3 | 510032.3 | 210511   |
| 410.9955 | 18.1595  | 18.1395  | 18.17383 | 3  | 3 | 0 | 36151.6  | 254111.1 | 136110.3 |
| 497.2687 | 21.01483 | 21.00583 | 21.07733 | 4  | 0 | 4 | 374352   | 63009.24 | 42826.67 |
| 408.2024 | 28.695   | 28.64283 | 28.79    | 3  | 0 | 3 | 77557.42 | 1119586  | 449374.2 |
| 985.4757 | 43.58783 | 43.563   | 43.61617 | 5  | 1 | 4 | 81594.56 | 62204.71 | 83799.86 |

|          |          |          |          |    |   |   |          |          |          |
|----------|----------|----------|----------|----|---|---|----------|----------|----------|
| 407.1206 | 20.62242 | 20.58967 | 20.65667 | 6  | 5 | 1 | 110318.3 | 611126.6 | 293764.1 |
| 595.422  | 43.77583 | 43.76917 | 43.8105  | 3  | 0 | 3 | 91537.7  | 191224.8 | 163939.9 |
| 712.3558 | 43.61617 | 43.5135  | 43.61683 | 5  | 2 | 3 | 83125.19 | 492596.2 | 152934.6 |
| 491.0818 | 25.13117 | 25.12733 | 25.14167 | 3  | 0 | 3 | 198049.5 | 3353.525 | 3321.765 |
| 347.131  | 29.52367 | 29.4915  | 29.53483 | 5  | 0 | 5 | 1010369  | 7212.499 | 6791.683 |
| 393.2205 | 43.58875 | 43.57217 | 43.60467 | 10 | 5 | 5 | 6962218  | 35294602 | 38574749 |
| 153.9484 | 27.85383 | 27.67667 | 28.26367 | 5  | 3 | 0 | 223738   | 1844198  | 907072.5 |
| 189.9924 | 2.821917 | 2.78495  | 2.868183 | 3  | 0 | 3 | 152322   | 165495.6 | 84217.12 |
| 399.3294 | 29.6965  | 29.47733 | 29.71233 | 4  | 4 | 0 | 27628410 | 1081781  | 2204919  |
| 584.3365 | 22.6955  | 22.6695  | 22.76083 | 5  | 2 | 3 | 61953.94 | 189336   | 66621.39 |
| 537.0878 | 25.77808 | 25.76133 | 25.80217 | 4  | 0 | 4 | 65090.75 | 8779.188 | 13790.01 |
| 606.2562 | 30.95767 | 30.93483 | 31.10217 | 10 | 5 | 5 | 913930.4 | 6162637  | 3369871  |
| 463.1715 | 32.77533 | 32.76167 | 32.838   | 5  | 1 | 4 | 468546   | 4323745  | 3919453  |
| 307.1635 | 19.41775 | 19.37867 | 19.56817 | 4  | 0 | 4 | 27918.46 | 44459.06 | 23019.4  |
| 324.2254 | 31.89883 | 31.88283 | 31.92733 | 3  | 0 | 3 | 66906.33 | 522751   | 191389.3 |
| 451.142  | 24.01533 | 24.00183 | 24.03283 | 5  | 0 | 5 | 2404995  | 11644.97 | 7340.126 |
| 580.2233 | 26.22483 | 26.18667 | 26.22667 | 3  | 3 | 0 | 44602.4  | 151883.8 | 83097.33 |
| 534.0883 | 29.52383 | 29.4915  | 29.53483 | 5  | 0 | 5 | 188633.7 | 4308.79  | 3190.964 |
| 373.1466 | 31.32867 | 31.301   | 31.36317 | 5  | 0 | 5 | 16227001 | 180435.4 | 335557.7 |
| 605.2625 | 30.96167 | 30.93717 | 31.0515  | 7  | 5 | 2 | 391919.7 | 2742028  | 1531819  |
| 706.1824 | 30.96483 | 30.93483 | 31.06583 | 10 | 5 | 5 | 153495.8 | 1196922  | 458951.2 |
| 690.4284 | 11.62902 | 11.57798 | 11.7604  | 5  | 1 | 4 | 52734.94 | 33103.44 | 44462.96 |
| 470.3329 | 31.71233 | 31.6825  | 31.73917 | 5  | 1 | 4 | 57624.3  | 596114.6 | 227132.5 |
| 442.1911 | 20.61358 | 20.58967 | 20.6525  | 4  | 4 | 0 | 46208.93 | 236157.3 | 104202.7 |
| 476.28   | 23.04817 | 23.0275  | 23.06    | 5  | 0 | 5 | 6406899  | 397972.2 | 183762.3 |
| 302.1969 | 17.26767 | 17.254   | 17.299   | 3  | 0 | 3 | 155742.8 | 347552.8 | 22301.72 |
| 335.2584 | 40.5775  | 40.5485  | 40.62867 | 4  | 0 | 4 | 391231.3 | 70953.53 | 13025.16 |
| 549.0876 | 29.56833 | 29.52033 | 29.59333 | 5  | 0 | 5 | 405277.8 | 5358.536 | 6295.634 |
| 535.0719 | 24.85125 | 24.815   | 24.86083 | 4  | 0 | 4 | 160161.2 | 13577.43 | 10281.1  |
| 181.0767 | 35.60108 | 35.55833 | 35.69567 | 4  | 0 | 4 | 58909.06 | 500295.2 | 71763.8  |
| 1214.737 | 43.578   | 43.55817 | 43.61617 | 5  | 1 | 4 | 47809.98 | 39777.31 | 52494.78 |
| 245.0134 | 37.873   | 37.8495  | 37.92383 | 8  | 5 | 3 | 28420.29 | 286464.3 | 74641.8  |
| 175.9768 | 2.837433 | 2.78495  | 2.85205  | 3  | 0 | 3 | 155471.1 | 299619.4 | 186091.1 |
| 465.1576 | 25.022   | 25.01033 | 25.0265  | 4  | 0 | 4 | 323137   | 76484.02 | 74570.22 |
| 604.2592 | 30.95017 | 30.93717 | 31.0515  | 9  | 5 | 4 | 1590737  | 11814172 | 6531130  |
| 378.0205 | 18.1585  | 18.124   | 18.17483 | 3  | 3 | 0 | 67211.2  | 318972.5 | 139351.3 |
| 213.1017 | 9.748108 | 9.61695  | 9.751083 | 4  | 3 | 1 | 1013096  | 390544.5 | 382975.8 |
| 595.0571 | 27.33642 | 27.31367 | 27.3695  | 4  | 0 | 4 | 159717.5 | 30724.89 | 36103.12 |
| 158.9738 | 2.781033 | 2.425817 | 2.837433 | 6  | 0 | 4 | 211769.4 | 885863.6 | 167003.1 |
| 497.1474 | 24.78533 | 24.74167 | 24.8095  | 5  | 0 | 5 | 565772.6 | 10781.19 | 9842.184 |
| 492.3772 | 44.33225 | 44.29217 | 44.38383 | 10 | 5 | 5 | 154627   | 1614798  | 190725.7 |
| 749.3866 | 43.60167 | 43.57283 | 43.61567 | 7  | 2 | 5 | 413040.5 | 859837.7 | 1071255  |
| 404.8165 | 2.504067 | 2.471067 | 2.56735  | 3  | 0 | 3 | 142381.2 | 130693.4 | 46380.57 |
| 375.1471 | 31.32867 | 31.301   | 31.36317 | 5  | 0 | 5 | 2224080  | 12959.47 | 13024.98 |
| 516.2304 | 20.38392 | 20.3615  | 20.40733 | 4  | 4 | 0 | 35044.04 | 139560.4 | 76831.5  |
| 362.1866 | 33.451   | 33.4485  | 33.486   | 3  | 0 | 3 | 81161.19 | 617260.5 | 183010.7 |
| 527.2795 | 21.11117 | 21.03467 | 21.149   | 3  | 0 | 3 | 591723.8 | 67330.56 | 27613.83 |

|          |          |          |          |    |   |   |          |          |          |
|----------|----------|----------|----------|----|---|---|----------|----------|----------|
| 202.082  | 23.7755  | 23.75067 | 23.79683 | 4  | 0 | 4 | 135292.2 | 35842.83 | 3334.435 |
| 374.1497 | 31.32867 | 31.301   | 31.36317 | 5  | 0 | 5 | 3924334  | 23161.24 | 48098.37 |
| 477.2834 | 23.04817 | 23.0275  | 23.06    | 5  | 0 | 5 | 2117865  | 60745.39 | 33839.08 |
| 349.1466 | 31.2025  | 31.17333 | 31.21283 | 4  | 0 | 4 | 179711.9 | 9462.689 | 7594.341 |
| 547.404  | 33.15    | 33.11033 | 33.16417 | 8  | 3 | 5 | 1215721  | 3473625  | 2936381  |
| 608.2554 | 30.94517 | 30.93417 | 31.06583 | 8  | 5 | 3 | 574695.3 | 3721622  | 2111060  |
| 381.2277 | 22.61883 | 22.59383 | 22.666   | 5  | 0 | 5 | 1091045  | 127374.4 | 61451.37 |
| 268.1629 | 17.185   | 16.97933 | 17.26767 | 4  | 0 | 3 | 50029.58 | 70569.44 | 36999.34 |
| 412.2509 | 43.58783 | 43.57267 | 43.60117 | 5  | 1 | 4 | 96275.03 | 389250.6 | 85406.05 |
| 550.0912 | 29.55892 | 29.52033 | 29.59333 | 4  | 0 | 4 | 103709.4 | 8206.316 | 5292.986 |
| 656.323  | 19.64042 | 19.61383 | 19.71217 | 4  | 0 | 4 | 871248.2 | 85685.57 | 49424.89 |
| 569.1138 | 28.9125  | 28.908   | 28.98033 | 3  | 0 | 3 | 64366.98 | 30468.74 | 38505.21 |
| 209.1175 | 14.23448 | 14.13205 | 14.26493 | 5  | 0 | 5 | 259145.8 | 172171.7 | 69064.75 |
| 476.2642 | 23.11333 | 23.08917 | 23.18183 | 3  | 3 | 0 | 6406899  | 136005.9 | 84939.15 |
| 265.1438 | 19.20767 | 19.205   | 19.2465  | 3  | 0 | 3 | 102220.7 | 37772.22 | 19690.81 |
| 401.2144 | 43.58767 | 43.55983 | 43.60467 | 10 | 5 | 5 | 928322.1 | 10879732 | 4319174  |
| 467.1732 | 24.20983 | 24.19517 | 24.20983 | 3  | 0 | 3 | 349407   | 53223.04 | 16819.44 |
| 656.323  | 19.99742 | 19.96633 | 20.12417 | 4  | 0 | 4 | 849878.2 | 65130.01 | 58009.14 |
| 469.1889 | 25.40208 | 25.38883 | 25.40783 | 4  | 0 | 4 | 319144.8 | 131715.9 | 47676.22 |
| 491.0822 | 25.76983 | 25.70633 | 25.78767 | 5  | 0 | 5 | 316648.3 | 6941.07  | 5718.751 |
| 303.1047 | 24.33533 | 24.29833 | 24.37483 | 4  | 0 | 4 | 31662.86 | 5282.766 | 7448.677 |
| 723.5096 | 32.83375 | 32.77633 | 32.86467 | 10 | 5 | 5 | 1056154  | 7385482  | 6250806  |
| 349.2379 | 27.29858 | 27.25683 | 27.34017 | 4  | 0 | 4 | 715095.1 | 185602   | 118376.3 |
| 348.1287 | 22.98967 | 22.90333 | 23.04483 | 5  | 0 | 5 | 119523.1 | 8394.354 | 15851.06 |
| 451.1781 | 30.92225 | 30.8885  | 30.95083 | 4  | 0 | 4 | 228227.5 | 75981.36 | 53421.86 |
| 223.064  | 24.95183 | 24.91533 | 24.99133 | 10 | 5 | 5 | 134719.1 | 1205773  | 288469.4 |
| 348.1344 | 29.52933 | 29.4915  | 29.53483 | 4  | 0 | 4 | 160098.4 | 5084.274 | 4661.077 |
| 640.3276 | 21.76967 | 21.69167 | 21.83617 | 5  | 0 | 5 | 1747828  | 24244.28 | 18216.53 |
| 305.1022 | 22.1125  | 22.06867 | 22.1365  | 9  | 5 | 4 | 339220.2 | 2009252  | 1060268  |
| 301.2168 | 31.32867 | 31.301   | 31.36317 | 5  | 0 | 5 | 6856479  | 1116655  | 1119872  |
| 452.1452 | 24.01533 | 24.00183 | 24.03283 | 5  | 0 | 5 | 536028.8 | 4037.518 | 5286.341 |
| 377.1424 | 31.32867 | 31.31517 | 31.3485  | 5  | 0 | 5 | 789271.7 | 36872.18 | 64949.18 |
| 532.1086 | 31.33083 | 31.32867 | 31.34333 | 4  | 0 | 4 | 87952.7  | 4493.74  | 3699.651 |
| 626.3122 | 18.64158 | 18.596   | 18.65583 | 4  | 0 | 4 | 281622   | 113225.7 | 74606.39 |
| 432.275  | 30.5885  | 30.562   | 30.60567 | 5  | 2 | 3 | 50200.01 | 305840.3 | 85813.55 |
| 361.2013 | 27.83383 | 27.82083 | 27.86817 | 3  | 0 | 3 | 334533.8 | 47473.53 | 14435.39 |
| 639.0135 | 31.32883 | 31.3185  | 31.36317 | 5  | 0 | 5 | 215369.7 | 3371.607 | 3743.934 |
| 813.5683 | 32.66767 | 32.627   | 32.715   | 5  | 1 | 4 | 29446.88 | 58278.94 | 69312.95 |
| 511.2841 | 24.00333 | 23.98317 | 24.03283 | 5  | 0 | 5 | 2380370  | 108715.8 | 51964.79 |
| 527.2792 | 20.80017 | 20.7735  | 20.83167 | 4  | 0 | 4 | 1208674  | 52195.86 | 27136.23 |
| 1149.804 | 43.58842 | 43.563   | 43.602   | 6  | 1 | 5 | 89068.61 | 28917.62 | 36159.63 |
| 219.8976 | 2.175667 | 2.092317 | 2.385283 | 5  | 5 | 0 | 51745.65 | 1209618  | 558952.7 |
| 405.1364 | 27.32333 | 27.3095  | 27.3695  | 4  | 0 | 4 | 212776.8 | 23281.49 | 22759.02 |
| 517.0815 | 31.33233 | 31.32867 | 31.36317 | 5  | 0 | 5 | 390450   | 5005.081 | 3075.74  |
| 363.126  | 26.45308 | 26.44317 | 26.47217 | 4  | 0 | 4 | 122176.5 | 15383.28 | 5808.54  |
| 592.4335 | 33.073   | 33.018   | 33.11267 | 7  | 3 | 4 | 228114   | 688067.4 | 699061.8 |
| 349.2378 | 31.55617 | 31.2565  | 31.63433 | 5  | 0 | 4 | 435760.8 | 152251.7 | 56748.68 |

|          |          |          |          |    |   |   |          |          |          |
|----------|----------|----------|----------|----|---|---|----------|----------|----------|
| 319.2272 | 31.32867 | 31.301   | 31.36317 | 5  | 0 | 5 | 38620884 | 165305.9 | 30563.62 |
| 641.3311 | 21.78433 | 21.70667 | 21.83617 | 5  | 0 | 5 | 549952.6 | 26602.06 | 29970.44 |
| 628.2374 | 30.94975 | 30.943   | 30.96417 | 4  | 4 | 0 | 110262.1 | 690961   | 410812.5 |
| 246.1855 | 32.58833 | 32.543   | 32.642   | 5  | 2 | 3 | 29195.95 | 169403.6 | 60196.12 |
| 727.5011 | 42.98033 | 42.95917 | 43.02667 | 3  | 0 | 3 | 65736.63 | 146869.5 | 167665.2 |
| 155.0029 | 2.772967 | 2.66885  | 2.85205  | 3  | 0 | 3 | 185816.3 | 1156278  | 127783.2 |
| 638.3126 | 20.629   | 20.56933 | 20.68767 | 3  | 0 | 3 | 346673.3 | 77676.57 | 54362.33 |
| 576.2278 | 26.21033 | 26.18667 | 26.23883 | 6  | 5 | 1 | 92471    | 505742.3 | 287608.2 |
| 319.2273 | 31.97483 | 31.94083 | 32.015   | 5  | 0 | 5 | 4873805  | 181318.3 | 66961.51 |
| 440.268  | 31.66092 | 31.63417 | 31.7265  | 6  | 5 | 1 | 70523.84 | 503809.8 | 244639.3 |
| 497.1476 | 26.58467 | 26.57533 | 26.6355  | 4  | 0 | 4 | 106616   | 13179.39 | 13506.25 |
| 493.0612 | 29.52017 | 29.4915  | 29.53483 | 5  | 0 | 5 | 205129.1 | 8717.728 | 5777.407 |
| 626.2766 | 26.86817 | 26.849   | 26.86817 | 3  | 3 | 0 | 35592.99 | 123384.3 | 58771.34 |
| 569.114  | 25.405   | 25.3585  | 25.41833 | 4  | 0 | 4 | 181644.2 | 5029.023 | 6550.872 |
| 532.0853 | 31.32192 | 31.30467 | 31.34333 | 4  | 0 | 4 | 133522.6 | 6775.884 | 5683.417 |
| 614.4847 | 31.43767 | 31.41417 | 31.48033 | 4  | 0 | 4 | 275943.3 | 244318.1 | 270791.4 |
| 533.0891 | 33.15733 | 33.11967 | 33.17183 | 3  | 0 | 3 | 52920.05 | 850.5983 | 1901.996 |
| 302.2201 | 31.3185  | 31.301   | 31.36317 | 7  | 2 | 5 | 1431705  | 232057.2 | 103031.4 |
| 763.1772 | 29.20017 | 29.2     | 29.22983 | 3  | 3 | 0 | 53218.53 | 185704.4 | 102862.7 |
| 656.3232 | 20.40883 | 20.34933 | 20.51283 | 3  | 0 | 3 | 311976   | 67943.79 | 58490.88 |
| 395.4931 | 43.56    | 43.51367 | 43.5875  | 4  | 0 | 4 | 33146.7  | 39314.14 | 55734.88 |
| 998.5081 | 43.602   | 43.53283 | 43.63217 | 7  | 2 | 5 | 113919.9 | 238518.9 | 290819   |
| 799.2651 | 31.37217 | 31.32867 | 31.40183 | 3  | 0 | 3 | 71024.31 | 1546.282 | 2117.521 |
| 159.9457 | 2.786917 | 2.7754   | 2.802033 | 3  | 0 | 3 | 89113.95 | 408809.3 | 59705.57 |
| 371.1513 | 31.32867 | 31.31517 | 31.36317 | 5  | 0 | 5 | 874910.9 | 237479.7 | 49180.89 |
| 489.0847 | 41.70342 | 41.67167 | 41.7295  | 10 | 5 | 5 | 45618.55 | 522610.5 | 135062.7 |
| 207.1018 | 10.19877 | 10.18735 | 10.33698 | 4  | 0 | 4 | 367192.4 | 262267   | 331985.3 |
| 397.2229 | 26.584   | 26.54567 | 26.62083 | 5  | 0 | 5 | 2018926  | 164295.9 | 79858.45 |
| 495.0774 | 31.19267 | 31.18767 | 31.19817 | 3  | 0 | 3 | 79537.98 | 4520.535 | 1285.888 |
| 605.0669 | 24.0315  | 24.00183 | 24.03283 | 4  | 0 | 4 | 53416    | 18200.33 | 38894.47 |
| 230.1472 | 15.87367 | 15.86547 | 15.87585 | 3  | 0 | 3 | 77820.26 | 21921.53 | 10168.2  |
| 320.2306 | 31.31433 | 31.301   | 31.36317 | 5  | 0 | 5 | 8576870  | 501904.1 | 201776.1 |
| 576.0988 | 24.853   | 24.84367 | 24.85917 | 5  | 0 | 5 | 125779.1 | 2725.111 | 3743.957 |
| 607.2585 | 30.94733 | 30.93717 | 30.99333 | 5  | 5 | 0 | 314323.8 | 1915922  | 1146956  |
| 556.326  | 19.77617 | 19.73133 | 19.887   | 5  | 2 | 3 | 47388.66 | 163783.1 | 37076.85 |
| 492.1687 | 26.598   | 26.556   | 26.6355  | 5  | 0 | 5 | 406016   | 37352.68 | 21122.5  |
| 317.2117 | 29.58317 | 29.50583 | 29.65167 | 5  | 1 | 4 | 358827.7 | 94670.51 | 16853.75 |
| 391.157  | 23.62667 | 23.616   | 23.63467 | 5  | 0 | 5 | 508044   | 51141.15 | 15921.04 |
| 440.2474 | 18.38    | 18.34433 | 18.402   | 5  | 0 | 5 | 418579   | 72307.08 | 49212.74 |
| 498.1508 | 24.79517 | 24.78283 | 24.82983 | 3  | 0 | 3 | 115765.3 | 8210.718 | 2273.889 |
| 430.1682 | 24.85883 | 24.8385  | 24.86083 | 5  | 0 | 5 | 342169   | 100783   | 21533.7  |
| 449.1265 | 27.333   | 27.3095  | 27.3695  | 5  | 0 | 5 | 376107.4 | 10183.14 | 10030.64 |
| 748.4857 | 40.49108 | 40.43883 | 40.5195  | 10 | 5 | 5 | 284536   | 2298829  | 744588.1 |
| 304.1086 | 22.09783 | 22.08617 | 22.1385  | 5  | 5 | 0 | 92155.38 | 325609.7 | 198337.4 |
| 627.3158 | 20.39383 | 20.32967 | 20.49967 | 4  | 0 | 4 | 164027.9 | 31382.59 | 17745.89 |
| 379.2121 | 29.5     | 29.46233 | 29.52017 | 4  | 0 | 4 | 451971.6 | 144064.7 | 74013.83 |
| 715.0087 | 24.02425 | 24.0165  | 24.03267 | 4  | 0 | 4 | 97102.59 | 2530.822 | 4286.321 |

|          |          |          |          |   |   |   |          |          |          |
|----------|----------|----------|----------|---|---|---|----------|----------|----------|
| 872.633  | 42.9225  | 42.905   | 42.98217 | 6 | 2 | 4 | 27445.73 | 75804.93 | 13059.03 |
| 258.8861 | 2.120333 | 2.06535  | 2.209433 | 7 | 4 | 3 | 213167.3 | 496879   | 122231.7 |
| 370.2957 | 33.17783 | 33.15733 | 33.21733 | 7 | 2 | 5 | 579968.1 | 2082819  | 1874022  |
| 558.1084 | 31.33092 | 31.301   | 31.34333 | 4 | 0 | 4 | 178329.6 | 9444.243 | 8581.183 |
| 285.1703 | 17.27458 | 17.26767 | 17.299   | 4 | 0 | 4 | 158895.4 | 257306.7 | 69168.79 |
| 309.0906 | 11.02872 | 10.87918 | 11.13185 | 6 | 0 | 5 | 267841.6 | 187257.2 | 224130.3 |
| 414.2286 | 29.875   | 29.79967 | 29.97    | 5 | 1 | 3 | 42097.12 | 162351.7 | 54618.2  |
| 379.1208 | 19.29417 | 19.29067 | 19.3055  | 3 | 0 | 3 | 30204    | 35545.84 | 46393    |
| 637.1152 | 23.798   | 23.76533 | 23.812   | 6 | 1 | 5 | 111852.5 | 85133.83 | 178147.1 |
| 478.2957 | 22.8565  | 22.82567 | 22.8605  | 5 | 0 | 5 | 1570075  | 309195.6 | 24315.8  |
| 263.8649 | 2.065542 | 2.0607   | 2.088633 | 4 | 0 | 4 | 61325.75 | 0        | 0        |
| 237.5826 | 24.78067 | 24.757   | 24.8295  | 3 | 0 | 3 | 190403.1 | 1579.88  | 2437.685 |
| 227.1282 | 14.2452  | 14.19148 | 14.25137 | 5 | 0 | 5 | 468255   | 388858.5 | 178419.6 |
| 322.0742 | 14.24215 | 14.23448 | 14.25975 | 3 | 0 | 3 | 132255.9 | 31277.27 | 25075.48 |
| 786.1749 | 29.111   | 29.10917 | 29.11167 | 3 | 3 | 0 | 55635.7  | 223576.6 | 127045.8 |
| 153.9483 | 28.8465  | 28.8055  | 28.9365  | 3 | 3 | 0 | 228164.5 | 4615606  | 2469840  |
| 275.201  | 29.52017 | 29.4915  | 29.52383 | 5 | 0 | 5 | 627526   | 97108.21 | 77433.15 |
| 597.0726 | 24.02883 | 24.00183 | 24.03283 | 5 | 0 | 5 | 1291231  | 9864.296 | 11606.75 |
| 405.1567 | 24.02458 | 24.01533 | 24.03283 | 4 | 0 | 4 | 69337.79 | 43915.89 | 17176.28 |
| 375.1621 | 33.17183 | 33.13417 | 33.17267 | 5 | 0 | 5 | 5562562  | 129582.5 | 75859.04 |
| 375.1623 | 30.44717 | 30.4275  | 30.45483 | 3 | 0 | 3 | 85135.76 | 53212.94 | 37370.11 |
| 519.077  | 31.96583 | 31.94083 | 32.0005  | 4 | 0 | 4 | 351682.9 | 53759.58 | 13528.43 |
| 398.9468 | 10.96525 | 10.83542 | 11.0617  | 3 | 0 | 3 | 193194.5 | 54595.7  | 79597.67 |
| 319.2272 | 31.66567 | 31.6555  | 31.67817 | 3 | 0 | 3 | 8536154  | 174373.4 | 57691.08 |
| 415.0479 | 23.57892 | 23.51717 | 23.60533 | 6 | 1 | 5 | 120302   | 245477.5 | 447415   |
| 453.1422 | 24.03033 | 24.00183 | 24.03283 | 5 | 0 | 5 | 262737.3 | 26759.84 | 28251.78 |
| 579.0619 | 24.97275 | 24.9495  | 24.99517 | 4 | 0 | 4 | 130836.2 | 10921.03 | 9330.318 |
| 626.3127 | 20.3745  | 20.3075  | 20.51283 | 5 | 0 | 5 | 506337.3 | 127889.6 | 92951.51 |
| 579.0622 | 26.10533 | 26.09383 | 26.13683 | 3 | 0 | 3 | 76188.17 | 6178.785 | 5816.34  |
| 1003.499 | 43.60183 | 43.5575  | 43.6045  | 4 | 1 | 3 | 94066.78 | 110555.6 | 174502.1 |
| 333.4142 | 37.02283 | 36.9765  | 37.16633 | 5 | 0 | 4 | 52705.96 | 0        | 0        |
| 469.1888 | 24.94967 | 24.9495  | 24.95417 | 3 | 0 | 3 | 348061.1 | 126273.6 | 89300.83 |
| 564.9915 | 29.491   | 29.49083 | 29.56833 | 3 | 0 | 3 | 32313.12 | 0        | 0        |
| 373.1466 | 31.97483 | 31.94083 | 32.0055  | 5 | 0 | 5 | 1536822  | 122106.3 | 198652.3 |
| 699.3391 | 31.36017 | 31.34333 | 31.37767 | 5 | 0 | 5 | 246921.5 | 6704.467 | 10737.54 |
| 439.142  | 24.32792 | 24.29833 | 24.32967 | 4 | 0 | 4 | 67740.33 | 21618.8  | 32744.4  |
| 498.2137 | 25.949   | 25.93917 | 26.00367 | 3 | 0 | 3 | 24621.44 | 2983.092 | 3070.36  |
| 667.023  | 29.52017 | 29.5055  | 29.52033 | 3 | 0 | 3 | 25982.01 | 819.7373 | 1832.988 |
| 638.3122 | 19.87417 | 19.80783 | 19.956   | 3 | 0 | 3 | 386011.2 | 122017.3 | 79113.1  |
| 612.3769 | 10.41382 | 10.36523 | 10.41965 | 4 | 0 | 4 | 4323769  | 26364.96 | 27551.06 |
| 597.073  | 26.58533 | 26.56017 | 26.6355  | 5 | 0 | 5 | 271489.1 | 17013.61 | 12375.46 |
| 347.6268 | 23.00417 | 22.96517 | 23.03067 | 5 | 0 | 5 | 341027.2 | 4035.162 | 3529.161 |
| 365.2331 | 20.37692 | 20.34933 | 20.49967 | 4 | 0 | 4 | 763530.9 | 80587.65 | 34962.38 |
| 349.2379 | 29.56833 | 29.52033 | 29.59333 | 5 | 0 | 5 | 4716766  | 71226.39 | 26931.18 |
| 600.0766 | 24.01817 | 24.0165  | 24.06217 | 3 | 0 | 3 | 31227.49 | 1970.148 | 1850.279 |
| 153.9484 | 29.94533 | 29.907   | 30.002   | 3 | 3 | 0 | 216360.3 | 2419613  | 1299160  |
| 595.0777 | 24.02883 | 24.01533 | 24.03283 | 5 | 0 | 5 | 134008.3 | 9066.698 | 8649.694 |

|          |          |          |          |    |   |   |          |          |          |
|----------|----------|----------|----------|----|---|---|----------|----------|----------|
| 382.2311 | 22.61883 | 22.60367 | 22.666   | 3  | 0 | 3 | 234784.1 | 164291.5 | 117472.6 |
| 553.3353 | 36.18533 | 36.16867 | 36.2175  | 5  | 5 | 0 | 82661.08 | 677898.6 | 403755.5 |
| 527.2796 | 20.36933 | 20.3345  | 20.49967 | 4  | 0 | 4 | 1595919  | 56930.05 | 13578.17 |
| 277.1146 | 10.23728 | 10.21668 | 10.38048 | 3  | 0 | 3 | 197029.1 | 74379.9  | 96116.61 |
| 454.2628 | 21.90983 | 21.831   | 21.96483 | 4  | 0 | 4 | 666405.9 | 3615286  | 2003919  |
| 1205.739 | 43.60167 | 43.578   | 43.674   | 7  | 2 | 5 | 370183.6 | 207133.6 | 400235.2 |
| 423.0558 | 25.50667 | 25.474   | 25.52567 | 5  | 0 | 5 | 75107.56 | 12390.13 | 14099.47 |
| 434.336  | 22.30408 | 22.24733 | 22.37683 | 4  | 3 | 1 | 32669.62 | 109553.7 | 38154.74 |
| 519.0769 | 31.32867 | 31.301   | 31.36317 | 5  | 0 | 5 | 3697735  | 70275.95 | 30385.77 |
| 474.1356 | 10.64867 | 10.63755 | 10.65117 | 3  | 3 | 0 | 147694.5 | 247923.6 | 149113.5 |
| 377.1626 | 33.17183 | 33.14883 | 33.1875  | 5  | 0 | 5 | 552707   | 141710.2 | 65716.11 |
| 153.9483 | 25.46983 | 25.37867 | 25.599   | 3  | 3 | 0 | 254669   | 4100797  | 2295625  |
| 451.1423 | 26.59167 | 26.57533 | 26.62083 | 4  | 0 | 4 | 220754.7 | 6664.195 | 4381.873 |
| 479.2991 | 22.8435  | 22.82567 | 22.87467 | 5  | 0 | 5 | 456885.1 | 41327.27 | 10983.58 |
| 494.0649 | 29.50917 | 29.5055  | 29.53483 | 3  | 0 | 3 | 44068.07 | 11847.41 | 22499.97 |
| 509.0565 | 27.8535  | 27.83383 | 27.867   | 3  | 0 | 3 | 24437.41 | 1916.136 | 4284.61  |
| 567.0982 | 23.76358 | 23.736   | 23.79683 | 4  | 0 | 4 | 283639.7 | 8513.417 | 8194.529 |
| 655.5    | 33.55383 | 33.49417 | 33.56017 | 3  | 0 | 3 | 37341.93 | 6878.133 | 4067.725 |
| 527.2795 | 20.05483 | 20.03117 | 20.20517 | 5  | 0 | 5 | 1958130  | 84149.22 | 78460.5  |
| 497.2687 | 18.4445  | 18.42417 | 18.4615  | 4  | 0 | 4 | 441729.8 | 37076.15 | 15963.87 |
| 502.3743 | 33.21817 | 33.17333 | 33.245   | 10 | 5 | 5 | 3203380  | 7610086  | 6789942  |
| 694.2471 | 21.78583 | 21.76967 | 21.82167 | 3  | 0 | 3 | 200073.9 | 4772.717 | 8097.842 |
| 375.1469 | 31.95683 | 31.94083 | 31.98967 | 3  | 0 | 3 | 185600.2 | 27249.93 | 14994.32 |
| 474.1582 | 26.091   | 26.07917 | 26.12217 | 3  | 0 | 3 | 84348.33 | 18675.68 | 21822.96 |
| 464.0824 | 25.51408 | 25.48883 | 25.52567 | 4  | 0 | 4 | 159946.4 | 50375.52 | 27341.28 |
| 301.2165 | 37.00533 | 36.97617 | 37.00783 | 5  | 0 | 5 | 6566271  | 486761.9 | 86263.03 |
| 394.2957 | 21.29983 | 21.20817 | 21.33583 | 5  | 0 | 5 | 156921.7 | 25064.5  | 24271.5  |
| 694.247  | 23.01692 | 22.98917 | 23.03067 | 4  | 0 | 4 | 301728.2 | 7383.309 | 9478.67  |
| 223.1696 | 25.16817 | 25.14167 | 25.18283 | 5  | 0 | 5 | 1049205  | 363266.8 | 273337.3 |
| 163.9767 | 2.810975 | 2.7296   | 2.91705  | 4  | 0 | 4 | 376306.7 | 1291271  | 646620.1 |
| 394.2048 | 29.695   | 29.54933 | 29.72433 | 5  | 1 | 4 | 62022    | 505866.7 | 188407.3 |
| 493.0977 | 26.92725 | 26.91267 | 26.9435  | 4  | 0 | 4 | 125809.7 | 11692.23 | 6931.934 |
| 365.233  | 20.03117 | 20.01633 | 20.14067 | 5  | 0 | 5 | 1003928  | 70916.53 | 25223.43 |
| 468.154  | 20.61367 | 20.58483 | 20.632   | 5  | 5 | 0 | 46482.57 | 267845.1 | 123638.4 |
| 409.1676 | 23.55433 | 23.54633 | 23.57583 | 5  | 0 | 5 | 390886.9 | 149518.3 | 3181.318 |
| 321.0788 | 23.7755  | 23.761   | 23.79683 | 4  | 0 | 4 | 110014.1 | 91164    | 61017.49 |
| 387.2262 | 9.69565  | 9.602367 | 9.748017 | 3  | 3 | 0 | 2.76E+08 | 92357371 | 1.28E+08 |
| 319.2272 | 30.61442 | 30.59083 | 30.63117 | 4  | 0 | 4 | 1549745  | 318726.9 | 71377.69 |
| 561.1069 | 31.3185  | 31.31433 | 31.36317 | 5  | 0 | 5 | 345661.4 | 33111.69 | 45495.07 |
| 222.5955 | 29.56633 | 29.50583 | 29.60783 | 4  | 0 | 4 | 199386.2 | 13316.81 | 26632.54 |
| 381.2278 | 21.96083 | 21.8625  | 21.96483 | 5  | 0 | 5 | 780368.4 | 196027.3 | 36205.22 |
| 640.3274 | 22.98967 | 22.9495  | 23.03067 | 5  | 0 | 5 | 3438336  | 23913.38 | 8685.513 |
| 596.2267 | 30.94517 | 30.93717 | 30.96417 | 4  | 4 | 0 | 158947.6 | 1129384  | 617687.3 |
| 528.2862 | 20.27783 | 20.05483 | 20.39883 | 6  | 0 | 4 | 410869.5 | 161950.5 | 122292.1 |
| 494.1692 | 26.59167 | 26.57533 | 26.6355  | 4  | 0 | 4 | 93431.85 | 5320.548 | 4370.944 |
| 786.2723 | 43.55817 | 43.54333 | 43.61617 | 5  | 1 | 4 | 174176.7 | 225561.8 | 356226.5 |
| 476.2851 | 23.82358 | 23.5705  | 23.86983 | 6  | 1 | 5 | 2282353  | 328027.9 | 206797.5 |

|          |          |          |          |    |   |   |          |          |          |
|----------|----------|----------|----------|----|---|---|----------|----------|----------|
| 479.2993 | 23.7295  | 23.68633 | 23.73667 | 4  | 0 | 4 | 181799.4 | 35069.55 | 20560.34 |
| 333.2428 | 37.59483 | 37.546   | 37.6065  | 5  | 0 | 5 | 15286255 | 116102.4 | 27634.97 |
| 408.124  | 20.62233 | 20.605   | 20.62817 | 3  | 3 | 0 | 32216.7  | 135110.5 | 61996.36 |
| 449.1498 | 24.00992 | 23.7885  | 24.03283 | 6  | 1 | 5 | 128409.7 | 51739.38 | 102334.7 |
| 547.0924 | 29.57883 | 29.54933 | 29.598   | 4  | 0 | 4 | 49242.26 | 2515.848 | 3665.484 |
| 393.173  | 26.65017 | 26.586   | 26.65383 | 3  | 0 | 3 | 164215   | 148458.3 | 63183.28 |
| 507.0546 | 41.70483 | 41.70333 | 41.74433 | 3  | 3 | 0 | 17223.83 | 132022.5 | 63098.16 |
| 297.0829 | 24.96008 | 24.91533 | 24.98883 | 8  | 4 | 4 | 84593.62 | 620378.5 | 162304.2 |
| 521.0924 | 33.15733 | 33.13983 | 33.17183 | 5  | 0 | 5 | 1538376  | 9747.253 | 7028.339 |
| 301.2166 | 37.59483 | 37.56117 | 37.6065  | 5  | 0 | 5 | 1347565  | 567433.9 | 173766.3 |
| 493.0976 | 27.3425  | 27.33933 | 27.37883 | 3  | 0 | 3 | 94792.25 | 10195.18 | 9972.067 |
| 535.0916 | 29.5275  | 29.477   | 29.53883 | 4  | 0 | 4 | 36209.13 | 5819.147 | 4778.079 |
| 513.2635 | 16.58867 | 16.54495 | 16.59778 | 3  | 0 | 3 | 91677.6  | 53882.83 | 39933.47 |
| 351.2173 | 26.57017 | 26.54567 | 26.62083 | 5  | 0 | 5 | 599795.9 | 91306.08 | 31699.17 |
| 511.2845 | 21.96867 | 21.94167 | 22.0505  | 4  | 0 | 4 | 1333720  | 126378.9 | 66375.49 |
| 167.0341 | 30.474   | 30.37583 | 30.50117 | 7  | 3 | 4 | 110609.5 | 920567.6 | 440794.8 |
| 321.1154 | 27.20558 | 27.17617 | 27.23733 | 4  | 0 | 4 | 139454   | 20932.5  | 10560.66 |
| 598.0761 | 26.58467 | 26.531   | 26.62083 | 4  | 0 | 4 | 69985.28 | 4811.776 | 8975.851 |
| 767.536  | 32.7595  | 32.7115  | 32.77617 | 10 | 5 | 5 | 811520.6 | 6027108  | 5569232  |
| 215.0072 | 21.69767 | 21.557   | 21.74217 | 8  | 5 | 3 | 108897.5 | 600263.3 | 335154.5 |
| 347.2221 | 28.89642 | 28.8675  | 28.951   | 4  | 0 | 4 | 884865.3 | 86338.25 | 29368.21 |
| 493.0823 | 25.78433 | 25.74717 | 25.78767 | 3  | 0 | 3 | 44429.02 | 2876.815 | 3939.734 |
| 313.0738 | 19.57633 | 19.51717 | 19.79067 | 6  | 1 | 4 | 127350.2 | 1466912  | 199133.4 |
| 766.5326 | 32.7595  | 32.69683 | 32.80283 | 10 | 5 | 5 | 2026858  | 15791902 | 14326495 |
| 399.2386 | 20.23875 | 20.22517 | 20.374   | 4  | 0 | 4 | 430558.6 | 102320.5 | 55538.63 |
| 213.0103 | 21.69983 | 21.6225  | 21.728   | 9  | 5 | 4 | 211655.8 | 1233030  | 690919.4 |
| 194.5862 | 37.00675 | 36.97717 | 37.02017 | 4  | 0 | 4 | 118203.1 | 1279.698 | 1752.569 |
| 202.0821 | 29.55892 | 29.50583 | 29.60783 | 4  | 0 | 4 | 113009.6 | 25374.24 | 12993.27 |
| 229.585  | 22.5335  | 22.5025  | 22.56233 | 3  | 0 | 3 | 153437.2 | 4155.675 | 3925.894 |
| 468.106  | 37.88    | 37.87833 | 37.91883 | 3  | 0 | 3 | 25559.72 | 116723.6 | 24663.44 |
| 598.0758 | 24.03033 | 24.0165  | 24.03283 | 5  | 0 | 5 | 338097.4 | 4562.529 | 5303.744 |
| 529.2951 | 21.06517 | 21.023   | 21.12033 | 5  | 0 | 5 | 708006.4 | 259898.5 | 232922.3 |
| 378.146  | 31.32333 | 31.301   | 31.35767 | 4  | 0 | 4 | 141072.3 | 9098.59  | 8935.293 |
| 363.2303 | 10.66553 | 10.65838 | 10.6789  | 3  | 3 | 0 | 1.13E+08 | 78650016 | 1.1E+08  |
| 381.228  | 20.54    | 20.51983 | 20.64567 | 5  | 0 | 5 | 903540.7 | 254149.9 | 117675.2 |
| 317.5783 | 31.31667 | 31.301   | 31.34333 | 4  | 0 | 4 | 181389.8 | 1197.248 | 1701.94  |
| 151.1118 | 31.32392 | 31.31433 | 31.34333 | 4  | 0 | 4 | 261141.4 | 210154.3 | 65082.77 |
| 498.2718 | 18.426   | 18.42417 | 18.4615  | 3  | 0 | 3 | 85807.16 | 70106.81 | 31529.78 |
| 471.1652 | 31.31833 | 31.31117 | 31.34983 | 3  | 3 | 0 | 216148.5 | 2768757  | 1832169  |
| 363.2174 | 20.22108 | 20.21633 | 20.374   | 4  | 0 | 4 | 546327.9 | 229249   | 139507.9 |
| 351.2534 | 30.92267 | 30.8885  | 30.949   | 5  | 0 | 5 | 1611230  | 26986.61 | 11331.04 |
| 302.2199 | 37.00533 | 36.97617 | 37.00783 | 5  | 0 | 5 | 1437042  | 448940.9 | 64796.96 |
| 481.1524 | 23.5785  | 23.574   | 23.5905  | 4  | 0 | 4 | 653700.4 | 129111.1 | 65839.77 |
| 177.0912 | 14.23088 | 14.14707 | 14.2452  | 4  | 0 | 4 | 141630.2 | 340462.7 | 108405.3 |
| 299.022  | 10.95091 | 10.85075 | 11.0617  | 4  | 0 | 4 | 424851.8 | 7230.572 | 9263.687 |
| 248.0632 | 18.1395  | 18.06983 | 18.1595  | 9  | 4 | 5 | 521730   | 3208503  | 1838883  |
| 724.5125 | 32.82967 | 32.791   | 32.87933 | 9  | 4 | 5 | 218038.4 | 1420405  | 1257607  |



|          |          |          |          |    |   |   |          |          |          |
|----------|----------|----------|----------|----|---|---|----------|----------|----------|
| 511.284  | 23.20917 | 23.167   | 23.23833 | 5  | 0 | 5 | 3340357  | 74204.23 | 54609.77 |
| 375.162  | 32.73967 | 32.72633 | 32.74717 | 4  | 0 | 4 | 1999631  | 91709.51 | 37334.32 |
| 244.1905 | 43.09467 | 43.09317 | 43.10583 | 3  | 3 | 0 | 60419.91 | 839085.6 | 90251.48 |
| 626.2405 | 30.95992 | 30.95217 | 30.96417 | 4  | 4 | 0 | 210762.4 | 1315440  | 886732.9 |
| 420.1812 | 43.59567 | 43.55567 | 43.61733 | 8  | 3 | 5 | 256354.2 | 1666726  | 1249033  |
| 749.4892 | 40.50225 | 40.4545  | 40.5195  | 10 | 5 | 5 | 100685.5 | 874607.1 | 306618.9 |
| 323.2585 | 35.49217 | 35.46467 | 35.53517 | 4  | 0 | 4 | 482913.8 | 130046.3 | 31338.26 |
| 512.2874 | 24.00333 | 23.968   | 24.03283 | 5  | 0 | 5 | 614310.4 | 224026.9 | 80464.31 |
| 641.3309 | 22.98967 | 22.9495  | 23.03067 | 5  | 0 | 5 | 1114484  | 67847.64 | 65998.47 |
| 151.1118 | 37.0055  | 36.99183 | 37.00783 | 4  | 0 | 4 | 516835.1 | 295229.9 | 46774.92 |
| 474.158  | 24.9765  | 24.96417 | 25.006   | 5  | 0 | 5 | 198674.4 | 33783.56 | 38445.06 |
| 503.1045 | 31.34333 | 31.301   | 31.36317 | 5  | 0 | 5 | 286668.4 | 29148.17 | 10765.25 |
| 354.2494 | 11.3074  | 11.22767 | 11.35    | 5  | 2 | 3 | 111972.8 | 201081.2 | 139871.2 |
| 321.2428 | 32.743   | 32.7115  | 32.74717 | 5  | 0 | 5 | 5784338  | 256854.2 | 211503.1 |
| 313.3011 | 23.517   | 23.3925  | 23.6795  | 5  | 3 | 0 | 41792996 | 12084247 | 17071783 |
| 351.2536 | 25.36025 | 25.34383 | 25.4035  | 4  | 0 | 4 | 908013.6 | 55011.93 | 32796.38 |
| 393.0999 | 33.52567 | 33.49617 | 33.5675  | 5  | 0 | 5 | 658614.9 | 41603.15 | 75690.25 |
| 762.1743 | 29.20692 | 29.2     | 29.215   | 4  | 4 | 0 | 99911.59 | 457884.2 | 262818.6 |
| 384.275  | 27.33642 | 27.31367 | 27.4135  | 4  | 0 | 4 | 178561.5 | 68656.08 | 67656.91 |
| 338.1418 | 22.635   | 22.59383 | 22.65117 | 5  | 0 | 5 | 244614.6 | 141049.6 | 199264   |
| 398.131  | 19.68208 | 19.67567 | 19.68767 | 6  | 5 | 1 | 176449   | 880733   | 527910.9 |
| 461.178  | 20.62517 | 20.58967 | 20.68567 | 6  | 4 | 2 | 103987.3 | 702252.9 | 392629.6 |
| 243.5551 | 31.35767 | 31.34617 | 31.3725  | 3  | 0 | 3 | 77828.06 | 1844.383 | 2665.931 |
| 431.2093 | 40.2665  | 40.24883 | 40.3155  | 7  | 2 | 5 | 40687.04 | 269597.4 | 112323   |
| 1155.791 | 43.59442 | 43.57467 | 43.6025  | 6  | 1 | 5 | 149434.5 | 201294.5 | 271471.7 |
| 955.0931 | 41.19283 | 41.178   | 41.22167 | 5  | 1 | 4 | 50568.69 | 39311.45 | 66949.68 |
| 331.2273 | 29.5495  | 29.50583 | 29.59333 | 3  | 0 | 3 | 355319.5 | 98348.06 | 11740.92 |
| 405.2101 | 43.6015  | 43.54783 | 43.61733 | 10 | 5 | 5 | 334041.4 | 3726902  | 1704924  |
| 493.1721 | 26.60942 | 26.57533 | 26.62717 | 4  | 0 | 4 | 78602.54 | 15421.08 | 10626.84 |
| 869.5892 | 43.63283 | 43.57383 | 43.6335  | 3  | 3 | 0 | 29225.01 | 68793.97 | 45386.73 |
| 333.2426 | 37.00533 | 36.96133 | 37.00783 | 5  | 0 | 5 | 75017856 | 89635.99 | 32022.79 |
| 574.4042 | 33.04058 | 33.007   | 33.11267 | 4  | 1 | 3 | 102838.7 | 573080.2 | 288943.4 |
| 223.5852 | 26.57092 | 26.54567 | 26.62083 | 4  | 0 | 4 | 121405   | 1933.502 | 2678.812 |
| 321.234  | 31.32867 | 31.301   | 31.3925  | 5  | 0 | 5 | 786230.5 | 216509.3 | 133223.8 |
| 320.5551 | 31.324   | 31.301   | 31.34333 | 4  | 0 | 4 | 63275.73 | 2195.725 | 4909.79  |
| 319.2273 | 25.13117 | 25.12367 | 25.14167 | 3  | 0 | 3 | 1187107  | 306725.2 | 276399.8 |
| 334.0815 | 37.00567 | 36.97517 | 37.02283 | 3  | 0 | 3 | 37641.58 | 570.473  | 1275.616 |
| 539.1507 | 43.6025  | 43.5135  | 43.67433 | 7  | 2 | 5 | 855631.6 | 2389718  | 3396516  |
| 194.0845 | 37.0055  | 36.96233 | 37.02283 | 4  | 0 | 4 | 460034   | 17913.36 | 13415.13 |
| 442.263  | 19.40817 | 19.33717 | 19.46583 | 5  | 0 | 5 | 161994.1 | 33775.02 | 23727.84 |
| 832.1101 | 30.922   | 30.91283 | 30.96167 | 3  | 3 | 0 | 29748.38 | 109251.9 | 68719.21 |
| 996.5078 | 43.58717 | 43.55817 | 43.6025  | 7  | 2 | 5 | 189435.4 | 212009   | 328333   |
| 750.4905 | 40.50833 | 40.50267 | 40.51733 | 4  | 4 | 0 | 28927.01 | 119755.2 | 50831.64 |
| 321.243  | 26.0485  | 26.02133 | 26.0605  | 3  | 0 | 3 | 378554   | 338672.9 | 333039.7 |
| 412.2335 | 27.332   | 27.29967 | 27.3695  | 5  | 0 | 5 | 399510.5 | 63095.49 | 30425.74 |
| 520.08   | 31.32867 | 31.30467 | 31.3485  | 5  | 0 | 5 | 846371.3 | 13410.17 | 11612.52 |
| 257.1903 | 35.60683 | 35.56183 | 35.68083 | 4  | 0 | 4 | 319624.1 | 143351.1 | 33813.11 |

|          |          |          |          |    |   |   |          |          |          |
|----------|----------|----------|----------|----|---|---|----------|----------|----------|
| 530.2986 | 21.06617 | 21.023   | 21.106   | 4  | 0 | 4 | 181172.7 | 61852.04 | 15560.74 |
| 277.2166 | 31.20233 | 31.17333 | 31.21283 | 4  | 0 | 4 | 294482.3 | 256755.8 | 70782.84 |
| 640.3275 | 23.75067 | 23.70833 | 23.75133 | 3  | 0 | 3 | 443398.9 | 30800.14 | 15783.17 |
| 607.2573 | 29.20683 | 29.18517 | 29.2755  | 6  | 5 | 1 | 176698.7 | 947595.9 | 601839.5 |
| 445.0105 | 18.155   | 18.1435  | 18.1595  | 3  | 3 | 0 | 33701.37 | 144996.2 | 75513.97 |
| 176.9845 | 2.389675 | 2.105717 | 2.535217 | 6  | 2 | 3 | 605254.5 | 1128455  | 1470244  |
| 293.2116 | 29.52367 | 29.477   | 29.5495  | 5  | 0 | 5 | 1672004  | 392518.5 | 315509   |
| 612.2642 | 30.822   | 30.80183 | 30.8325  | 3  | 3 | 0 | 35308.81 | 150850.2 | 99731.62 |
| 454.1456 | 24.03283 | 24.0165  | 24.0475  | 3  | 0 | 3 | 49239.24 | 2923.363 | 4776.423 |
| 384.2977 | 10.53356 | 10.4986  | 10.63728 | 6  | 4 | 2 | 512249.5 | 393619.8 | 286112.7 |
| 575.3132 | 29.15517 | 29.14067 | 29.199   | 3  | 3 | 0 | 289000.9 | 348940.8 | 508963.4 |
| 207.5902 | 31.31683 | 31.29983 | 31.32883 | 4  | 0 | 4 | 191084.5 | 1197.001 | 1641.215 |
| 411.0734 | 30.38417 | 30.33317 | 30.4565  | 4  | 1 | 3 | 72661.25 | 43056.93 | 56510.16 |
| 153.9484 | 27.25467 | 27.179   | 27.472   | 4  | 3 | 0 | 250061.2 | 3646629  | 2167231  |
| 459.1624 | 26.651   | 26.63517 | 26.68133 | 5  | 4 | 1 | 54121.82 | 229113.7 | 131255.2 |
| 683.9767 | 43.18883 | 43.17333 | 43.20367 | 5  | 1 | 4 | 59744.64 | 160630   | 211613.9 |
| 247.2058 | 33.17783 | 33.11033 | 33.1865  | 3  | 0 | 3 | 108418.8 | 653010.6 | 411839.6 |
| 195.0923 | 38.85333 | 38.8515  | 38.88283 | 3  | 0 | 3 | 120074.5 | 1944962  | 321644.4 |
| 321.2428 | 33.15733 | 33.13983 | 33.17267 | 5  | 0 | 5 | 22517034 | 224994.1 | 185049.1 |
| 363.2172 | 24.68775 | 24.66817 | 24.70717 | 4  | 0 | 4 | 1122921  | 279602.7 | 137961.7 |
| 214.5977 | 37.05733 | 37.00783 | 37.12517 | 4  | 0 | 4 | 111916.1 | 1330.576 | 1822.165 |
| 995.5044 | 43.60183 | 43.578   | 43.61617 | 6  | 1 | 5 | 350963.3 | 366482.9 | 542215.1 |
| 604.2382 | 26.86783 | 26.849   | 26.9065  | 6  | 5 | 1 | 53710.67 | 262888.7 | 173260.5 |
| 423.1832 | 28.94075 | 28.9125  | 28.96567 | 4  | 0 | 4 | 97988.35 | 88146.98 | 45342.53 |
| 379.158  | 33.17225 | 33.13983 | 33.1865  | 4  | 0 | 4 | 188230   | 227447.5 | 79841.34 |
| 351.2535 | 28.9185  | 28.89767 | 28.96567 | 4  | 0 | 4 | 527717.8 | 43146.53 | 41666.83 |
| 322.2462 | 33.15733 | 33.125   | 33.17267 | 5  | 0 | 5 | 4983411  | 1850493  | 584698.1 |
| 360.1262 | 25.41983 | 25.373   | 25.433   | 4  | 0 | 4 | 95483.69 | 24470.9  | 33879.96 |
| 320.095  | 21.87383 | 21.76833 | 21.9075  | 5  | 0 | 5 | 80513.82 | 2143.323 | 3401.134 |
| 334.246  | 37.00533 | 36.97617 | 37.00783 | 5  | 0 | 5 | 17762578 | 3094909  | 785064.9 |
| 467.1732 | 23.76617 | 23.761   | 23.79683 | 5  | 0 | 5 | 503387.5 | 80702.15 | 69983.15 |
| 416.1888 | 33.17183 | 33.13983 | 33.1875  | 5  | 0 | 5 | 1363125  | 173266.4 | 107948.9 |
| 1443.971 | 43.58783 | 43.58717 | 43.6045  | 5  | 1 | 4 | 193522.3 | 59031.97 | 92488.73 |
| 402.2176 | 43.59517 | 43.55983 | 43.6335  | 8  | 5 | 3 | 186150.5 | 1858655  | 919562.9 |
| 509.6988 | 42.7095  | 42.69833 | 42.7515  | 9  | 4 | 5 | 144921.5 | 1319074  | 176873.1 |
| 323.2586 | 35.09983 | 35.0405  | 35.103   | 5  | 0 | 5 | 2287033  | 112928.3 | 59674.86 |
| 414.1498 | 31.3185  | 31.301   | 31.35767 | 5  | 0 | 5 | 215525.1 | 3152.612 | 5330.495 |
| 335.0154 | 37.00533 | 36.9465  | 37.00783 | 5  | 0 | 5 | 290216.1 | 4637.676 | 6352.581 |
| 394.1032 | 33.52567 | 33.50617 | 33.5675  | 4  | 0 | 4 | 104766.2 | 7354.004 | 6419.17  |
| 513.2804 | 24.03283 | 24.018   | 24.046   | 3  | 0 | 3 | 78693.82 | 120689.4 | 82232.4  |
| 525.0463 | 23.38375 | 23.32317 | 23.4305  | 4  | 1 | 3 | 109215.7 | 371561.9 | 303850.4 |
| 386.2907 | 28.944   | 28.9125  | 28.98033 | 5  | 0 | 5 | 500191.4 | 88729.48 | 21390.72 |
| 485.1808 | 34.234   | 34.2135  | 34.24533 | 3  | 3 | 0 | 135807.5 | 2017815  | 1353058  |
| 331.484  | 37.00533 | 36.97617 | 37.00783 | 5  | 0 | 5 | 287215   | 677.9671 | 1515.981 |
| 360.188  | 43.61875 | 43.572   | 43.64517 | 10 | 5 | 5 | 355774.9 | 3760281  | 1908420  |
| 491.374  | 44.32567 | 44.307   | 44.3745  | 10 | 5 | 5 | 1064781  | 12288091 | 1719761  |
| 529.374  | 33.15767 | 33.11033 | 33.17183 | 7  | 2 | 5 | 466676.6 | 1416490  | 1244995  |

|          |          |          |          |   |   |   |          |          |          |
|----------|----------|----------|----------|---|---|---|----------|----------|----------|
| 497.2688 | 20.255   | 20.21583 | 20.403   | 5 | 0 | 5 | 876796.6 | 41573.66 | 13977.36 |
| 317.9077 | 31.32358 | 31.301   | 31.34333 | 4 | 0 | 4 | 63074.55 | 104074.9 | 226185.8 |
| 477.2833 | 23.85492 | 23.82083 | 23.88467 | 4 | 0 | 4 | 698432.9 | 95649.16 | 26630.83 |
| 509.0925 | 23.56717 | 23.56067 | 23.57583 | 3 | 0 | 3 | 81988.29 | 10991.35 | 15356.46 |
| 610.9973 | 29.52383 | 29.477   | 29.53483 | 3 | 0 | 3 | 51841.93 | 3302.21  | 3658.159 |
| 588.8696 | 25.6825  | 25.65733 | 25.70383 | 5 | 1 | 4 | 69717.72 | 60202.51 | 127913.1 |
| 609.0182 | 25.787   | 25.76133 | 25.8135  | 4 | 0 | 4 | 35913.14 | 6198.201 | 12315.07 |
| 522.2566 | 32.03558 | 31.91233 | 32.07183 | 4 | 4 | 0 | 484642.6 | 149101   | 89961.35 |
| 691.4638 | 29.862   | 29.82517 | 29.90083 | 7 | 5 | 2 | 56163.44 | 422039.2 | 63104.28 |
| 320.2306 | 31.95858 | 31.94083 | 32.0005  | 4 | 0 | 4 | 1062675  | 570773.4 | 178850.4 |
| 338.1779 | 40.97908 | 40.96717 | 41.04333 | 4 | 0 | 4 | 35021.02 | 423058.1 | 80442.41 |
| 271.0871 | 11.00447 | 10.92607 | 11.09358 | 6 | 4 | 2 | 1020826  | 1144292  | 1431846  |
| 291.0866 | 18.12517 | 18.0555  | 18.1585  | 7 | 4 | 3 | 237289.2 | 1307685  | 790231.1 |
| 303.2323 | 33.15733 | 33.13983 | 33.17267 | 5 | 0 | 5 | 4510815  | 311212.6 | 273303.2 |
| 277.2165 | 37.44467 | 37.41033 | 37.44717 | 4 | 0 | 4 | 317002.2 | 370035.2 | 52565.64 |
| 369.2204 | 10.43718 | 10.43703 | 10.51042 | 3 | 3 | 0 | 62583236 | 17038707 | 28068704 |
| 238.1121 | 22.12875 | 22.08617 | 22.15117 | 6 | 5 | 1 | 122153.2 | 506398.4 | 247463.1 |
| 574.1162 | 33.17183 | 33.09067 | 33.20117 | 3 | 0 | 3 | 61110.74 | 8881.487 | 10710.87 |
| 333.243  | 36.4255  | 36.407   | 36.45633 | 4 | 0 | 4 | 4054711  | 112422.6 | 39293.71 |
| 481.1524 | 22.5615  | 22.50167 | 22.57717 | 5 | 0 | 5 | 978518.4 | 132907.8 | 73445.8  |
| 456.1482 | 24.22483 | 24.1945  | 24.23933 | 3 | 0 | 3 | 32299.8  | 3097.971 | 4280.318 |
| 235.1695 | 31.3305  | 31.301   | 31.34333 | 4 | 0 | 4 | 206338.7 | 188843.6 | 17284.04 |
| 419.1522 | 31.3185  | 31.31433 | 31.34333 | 3 | 0 | 3 | 73015.26 | 82775.35 | 39834.46 |
| 329.1118 | 21.7065  | 21.651   | 21.728   | 6 | 5 | 1 | 82018.3  | 490643.4 | 277679.8 |
| 414.2492 | 24.01533 | 24.00183 | 24.0475  | 5 | 0 | 5 | 1495865  | 285918.1 | 47638.15 |
| 345.1359 | 29.53483 | 29.4915  | 29.55367 | 4 | 0 | 4 | 54258.24 | 48738.52 | 36088.55 |
| 224.173  | 25.1765  | 25.12683 | 25.21183 | 5 | 0 | 5 | 123847.5 | 7639.788 | 11753.05 |
| 628.3279 | 19.57358 | 19.5405  | 19.64167 | 4 | 0 | 4 | 101009.6 | 31712.3  | 14141.22 |
| 639.9499 | 43.44017 | 43.411   | 43.44117 | 5 | 1 | 4 | 43754.47 | 104728.8 | 143184.7 |
| 350.2413 | 29.56833 | 29.52033 | 29.59333 | 5 | 0 | 5 | 1156915  | 334832.6 | 193614.1 |
| 411.1503 | 24.02458 | 23.80217 | 24.04767 | 4 | 1 | 3 | 70562.05 | 37337.93 | 40237.24 |
| 523.0923 | 33.17917 | 33.125   | 33.1875  | 4 | 0 | 4 | 128079.1 | 6022.521 | 5834.96  |
| 562.1193 | 33.16333 | 33.13983 | 33.1875  | 5 | 0 | 5 | 1128644  | 13722.68 | 13463.44 |
| 208.5979 | 33.20117 | 33.13983 | 33.2025  | 3 | 0 | 3 | 166486.5 | 1038.057 | 2321.165 |
| 303.2322 | 38.88283 | 38.86367 | 38.88633 | 5 | 0 | 5 | 5676818  | 153005.2 | 46304.03 |
| 186.0747 | 27.22067 | 27.20017 | 27.34017 | 3 | 0 | 3 | 26997.08 | 8401.81  | 7390.782 |
| 673.5303 | 33.54675 | 33.501   | 33.59767 | 6 | 1 | 5 | 243242.1 | 156032   | 190272.6 |
| 638.0161 | 31.34333 | 31.32883 | 31.3485  | 5 | 0 | 5 | 167717.9 | 28191.87 | 27322    |
| 478.2957 | 23.723   | 23.69267 | 23.73667 | 5 | 0 | 5 | 750581.9 | 281826   | 112834.7 |
| 333.4562 | 36.99867 | 36.945   | 37.113   | 4 | 0 | 4 | 79594.95 | 0        | 0        |
| 331.8352 | 37.0055  | 36.97717 | 37.00783 | 4 | 0 | 4 | 122218.5 | 31726.43 | 67982.81 |
| 177.0911 | 37.006   | 36.99117 | 37.03783 | 4 | 0 | 4 | 283715.3 | 369176.8 | 54860.35 |
| 164.0424 | 33.52317 | 33.49617 | 33.5675  | 4 | 0 | 4 | 114916.6 | 17829.67 | 4751.364 |
| 277.6316 | 31.06583 | 30.97867 | 31.088   | 3 | 0 | 3 | 38198.66 | 40160.87 | 57529.66 |
| 381.2277 | 22.9685  | 22.95983 | 22.97417 | 3 | 0 | 3 | 734096.9 | 96902.63 | 57143.76 |
| 1446.976 | 43.58967 | 43.57267 | 43.64533 | 5 | 1 | 3 | 59349.98 | 49642.35 | 70241.74 |
| 551.0313 | 30.777   | 30.73283 | 30.80633 | 3 | 0 | 3 | 84874.8  | 133740.1 | 180699.1 |

|          |          |          |          |    |   |   |          |          |          |
|----------|----------|----------|----------|----|---|---|----------|----------|----------|
| 520.095  | 33.17183 | 33.13983 | 33.1875  | 4  | 0 | 4 | 81518.67 | 7409.639 | 8270.9   |
| 788.1904 | 30.25383 | 30.23533 | 30.26867 | 4  | 4 | 0 | 41453.97 | 180603.4 | 123064.6 |
| 321.243  | 27.37883 | 27.32817 | 27.38417 | 3  | 0 | 3 | 324210.7 | 462387.1 | 423200.9 |
| 561.1217 | 33.15583 | 33.11267 | 33.1875  | 4  | 0 | 4 | 41806.69 | 8242.966 | 5677.017 |
| 320.889  | 31.3095  | 31.301   | 31.34333 | 4  | 0 | 4 | 197171.8 | 91916.11 | 137873.5 |
| 391.1574 | 25.76983 | 25.70633 | 25.78633 | 5  | 0 | 5 | 853609.9 | 87956.87 | 47686.93 |
| 429.1264 | 20.959   | 20.77367 | 21.03617 | 6  | 5 | 1 | 69459.51 | 547618   | 220114.3 |
| 563.1037 | 31.30067 | 31.277   | 31.40117 | 4  | 0 | 3 | 68122.28 | 5263.231 | 5534.96  |
| 450.1298 | 27.32875 | 27.29967 | 27.3695  | 4  | 0 | 4 | 59288.36 | 2947.821 | 2875.505 |
| 289.0895 | 18.13383 | 18.06983 | 18.1595  | 10 | 5 | 5 | 435712   | 2535770  | 1549779  |
| 513.2999 | 24.32783 | 24.32783 | 24.328   | 3  | 0 | 3 | 90576.67 | 106065.7 | 30004.67 |
| 174.0689 | 29.522   | 29.4915  | 29.53483 | 4  | 0 | 4 | 37529.75 | 18016.33 | 11939    |
| 163.039  | 33.5305  | 33.49617 | 33.58317 | 7  | 2 | 5 | 1445403  | 161511.1 | 177270.6 |
| 250.0598 | 18.12933 | 18.09867 | 18.19983 | 10 | 5 | 5 | 301464.3 | 1659518  | 998831.7 |
| 334.6589 | 37.00675 | 36.97717 | 37.02017 | 4  | 0 | 4 | 125579.8 | 2347.863 | 2326.607 |
| 550.1196 | 23.58967 | 23.57583 | 23.62667 | 3  | 0 | 3 | 44735.96 | 6741.314 | 7178.964 |
| 458.3481 | 33.23642 | 33.19067 | 33.29117 | 10 | 5 | 5 | 2358471  | 5574883  | 5199680  |
| 523.3653 | 10.70066 | 10.63273 | 10.75237 | 8  | 3 | 5 | 2061107  | 2557974  | 3536135  |
| 398.2261 | 26.584   | 26.54117 | 26.62083 | 5  | 0 | 5 | 495032.5 | 179922.1 | 94499.59 |
| 207.1018 | 24.01533 | 24.00183 | 24.03283 | 5  | 0 | 5 | 1098498  | 113714   | 17879.38 |
| 495.8419 | 29.66617 | 29.66617 | 29.6815  | 4  | 3 | 1 | 113845.2 | 238750.4 | 130032.2 |
| 345.2065 | 22.53183 | 22.49    | 22.5335  | 3  | 0 | 3 | 316663.4 | 155806.6 | 71610.91 |
| 275.201  | 35.60683 | 35.56183 | 35.666   | 4  | 0 | 4 | 793535.3 | 73463.81 | 30703.88 |
| 586.2482 | 29.12433 | 29.111   | 29.12433 | 3  | 3 | 0 | 46023.76 | 123719.4 | 86009.77 |
| 642.3431 | 22.81258 | 22.73283 | 22.84617 | 4  | 0 | 4 | 364166.4 | 82823.6  | 47790.66 |
| 219.0573 | 16.18831 | 16.14437 | 16.22193 | 10 | 5 | 5 | 195509.3 | 202700.8 | 171587   |
| 335.2586 | 38.37    | 38.35433 | 38.403   | 4  | 0 | 4 | 5600287  | 122455.8 | 18510.26 |
| 443.0458 | 22.636   | 22.59383 | 22.67567 | 5  | 0 | 5 | 186376.5 | 31128.79 | 41798.89 |
| 471.0448 | 25.7215  | 25.67583 | 25.73    | 3  | 3 | 0 | 27711.46 | 61811.15 | 39635.88 |
| 309.1704 | 21.0345  | 20.96633 | 21.03783 | 5  | 0 | 5 | 225280.6 | 139902.2 | 58857.78 |
| 333.2428 | 30.4565  | 30.433   | 30.47117 | 4  | 0 | 4 | 1261835  | 64149.47 | 24358.33 |
| 305.0953 | 21.76967 | 21.6765  | 21.779   | 5  | 0 | 5 | 1214329  | 68720.52 | 50353.12 |
| 468.4232 | 39.77867 | 39.63983 | 39.816   | 3  | 0 | 3 | 4830146  | 22894558 | 9769332  |
| 153.9483 | 30.68117 | 30.679   | 30.71167 | 3  | 3 | 0 | 201788   | 2551239  | 1579206  |
| 217.1588 | 37.01408 | 36.97717 | 37.03467 | 4  | 0 | 4 | 177487   | 254204.9 | 100909.6 |
| 338.233  | 35.22017 | 35.09967 | 35.30933 | 5  | 2 | 3 | 61739.65 | 417787.2 | 141827   |
| 674.3335 | 19.50233 | 19.48167 | 19.58883 | 3  | 0 | 3 | 70498.28 | 2757.218 | 3362.953 |
| 355.2247 | 37.59692 | 37.56117 | 37.6065  | 4  | 0 | 4 | 673033.6 | 169001.4 | 68163.05 |
| 1156.795 | 43.60117 | 43.578   | 43.61617 | 7  | 2 | 5 | 119712.8 | 135787   | 185124.8 |
| 695.0196 | 29.56633 | 29.52033 | 29.60783 | 4  | 0 | 4 | 40970.94 | 2161.497 | 3200.27  |
| 414.173  | 31.6215  | 31.59783 | 31.656   | 5  | 0 | 5 | 988982.4 | 531739.3 | 150832.1 |
| 334.2462 | 37.58017 | 37.546   | 37.6065  | 5  | 0 | 5 | 3483673  | 3234466  | 695821.1 |
| 415.3252 | 33.2215  | 33.18917 | 33.251   | 7  | 2 | 5 | 263869.7 | 589850.4 | 442358.2 |
| 537.0873 | 23.62983 | 23.61883 | 23.64933 | 4  | 0 | 4 | 188988.3 | 37591.84 | 66634.36 |
| 335.2583 | 39.4495  | 39.384   | 39.46133 | 3  | 0 | 3 | 11023016 | 112452.6 | 39986.56 |
| 591.9384 | 22.943   | 22.938   | 23.03917 | 3  | 3 | 0 | 34713.45 | 97908.5  | 57784.9  |
| 414.3218 | 33.23417 | 33.19067 | 33.26167 | 9  | 4 | 5 | 1282188  | 2616534  | 2096630  |

|          |          |          |          |    |   |   |          |          |          |
|----------|----------|----------|----------|----|---|---|----------|----------|----------|
| 400.9368 | 10.39563 | 10.28922 | 10.42228 | 4  | 3 | 1 | 393538.8 | 391972.7 | 370754.3 |
| 289.2166 | 35.60683 | 35.56183 | 35.666   | 4  | 0 | 4 | 521731.1 | 288349.8 | 81140.38 |
| 516.1138 | 30.44917 | 30.442   | 30.4615  | 4  | 0 | 4 | 58252.61 | 0        | 0        |
| 331.2382 | 27.26092 | 27.17183 | 27.31083 | 8  | 2 | 4 | 288027.8 | 132694.6 | 72496.3  |
| 203.143  | 37.02017 | 36.99017 | 37.02283 | 3  | 0 | 3 | 69459.98 | 91185.35 | 18639.53 |
| 333.104  | 37.11908 | 37.02017 | 37.24    | 4  | 0 | 3 | 58256.73 | 3302.051 | 5683.368 |
| 352.2567 | 30.93633 | 30.8885  | 30.97867 | 5  | 0 | 5 | 320732.1 | 21485.58 | 29018.2  |
| 324.2618 | 35.07017 | 35.02733 | 35.103   | 4  | 0 | 4 | 480457   | 172472.9 | 152982.1 |
| 247.1696 | 30.22233 | 30.175   | 30.28133 | 4  | 0 | 4 | 276377.8 | 182592.2 | 82487.44 |
| 381.2278 | 24.53683 | 24.52033 | 24.56433 | 4  | 0 | 4 | 805451.6 | 155015.4 | 73719.27 |
| 379.212  | 28.66925 | 28.65783 | 28.717   | 4  | 0 | 4 | 565616.3 | 292055.7 | 110500.6 |
| 389.1416 | 22.32617 | 22.27817 | 22.35567 | 5  | 0 | 5 | 618591.5 | 185164.8 | 293190.8 |
| 151.1118 | 38.85333 | 38.826   | 38.9125  | 4  | 0 | 4 | 188646.2 | 515216.5 | 81307.35 |
| 942.6379 | 32.4985  | 32.44333 | 32.511   | 7  | 3 | 4 | 169859.2 | 992104.1 | 705440.7 |
| 413.0687 | 30.43283 | 30.33317 | 30.47117 | 8  | 3 | 5 | 1168382  | 1635671  | 3006688  |
| 373.1668 | 33.15725 | 33.125   | 33.1875  | 4  | 0 | 4 | 260574.1 | 200479.4 | 91995.31 |
| 883.162  | 41.193   | 41.16333 | 41.23617 | 7  | 2 | 5 | 342341.4 | 396706.6 | 497369.4 |
| 855.1675 | 41.18558 | 41.1485  | 41.26517 | 6  | 1 | 5 | 69623.85 | 48543.3  | 74367.51 |
| 493.2735 | 24.25417 | 24.23967 | 24.28383 | 5  | 0 | 5 | 180671.7 | 68049.52 | 12012.85 |
| 552.4385 | 43.60183 | 43.57267 | 43.6335  | 7  | 5 | 2 | 123056.4 | 907916.4 | 546141.1 |
| 1206.744 | 43.60167 | 43.5575  | 43.6025  | 7  | 2 | 5 | 245909.8 | 169499   | 285795   |
| 283.1545 | 19.21975 | 19.205   | 19.26167 | 4  | 0 | 4 | 289490.4 | 493993.3 | 66418.29 |
| 562.119  | 32.74533 | 32.7115  | 32.74717 | 3  | 0 | 3 | 253941.2 | 19209.47 | 18988.65 |
| 341.2092 | 31.32867 | 31.301   | 31.36317 | 5  | 0 | 5 | 1282351  | 285481.5 | 80347.64 |
| 470.1527 | 20.62233 | 20.5745  | 20.64767 | 3  | 3 | 0 | 30967.66 | 141860.7 | 73793.22 |
| 435.1677 | 37.00533 | 36.97717 | 37.00783 | 5  | 0 | 5 | 275802.1 | 97978.32 | 42462.04 |
| 207.1019 | 27.32333 | 27.3095  | 27.3695  | 4  | 0 | 4 | 101177.5 | 103398.9 | 17060.24 |
| 1040.732 | 44.16667 | 44.0945  | 44.21283 | 6  | 1 | 5 | 61007.63 | 85537.43 | 121169.8 |
| 271.9166 | 2.526517 | 2.471067 | 2.557617 | 3  | 0 | 3 | 104326.2 | 1066891  | 254818.6 |
| 332.4796 | 36.99142 | 36.97717 | 37.03467 | 4  | 0 | 4 | 67534.46 | 1630.691 | 2232.962 |
| 397.5714 | 32.12167 | 32.0415  | 32.2235  | 5  | 1 | 3 | 122669.9 | 162824.4 | 364086.4 |
| 553.4684 | 33.57317 | 33.536   | 33.62667 | 4  | 4 | 0 | 40443.79 | 253943.3 | 120837.3 |
| 362.1854 | 43.61217 | 43.58667 | 43.6335  | 10 | 5 | 5 | 159103.6 | 1729758  | 991423.7 |
| 403.2113 | 43.59483 | 43.572   | 43.60817 | 10 | 5 | 5 | 468430.6 | 5682216  | 2636296  |
| 642.3431 | 24.1805  | 24.15067 | 24.1945  | 3  | 0 | 3 | 131546.3 | 64373.52 | 50848.46 |
| 864.627  | 44.8415  | 44.78133 | 44.92467 | 4  | 1 | 3 | 31009.42 | 39306.98 | 34969.59 |
| 351.2535 | 31.40183 | 31.38583 | 31.44533 | 3  | 0 | 3 | 860776.1 | 57225.23 | 36464.15 |
| 321.2429 | 33.8615  | 33.82983 | 33.87667 | 4  | 0 | 4 | 1141843  | 159360.5 | 112832.1 |
| 416.1886 | 32.72983 | 32.70167 | 32.7325  | 3  | 0 | 3 | 161568.6 | 126788.4 | 39104.22 |
| 318.5882 | 28.58067 | 28.52667 | 28.64283 | 4  | 1 | 3 | 47629.36 | 39508.7  | 83904.48 |
| 336.803  | 2.5056   | 2.48605  | 2.51995  | 3  | 0 | 3 | 218829.5 | 3374.284 | 5050.527 |
| 307.2273 | 35.63967 | 35.56183 | 35.666   | 5  | 0 | 5 | 3051339  | 229741.1 | 98819.1  |
| 715.1777 | 30.95217 | 30.94733 | 30.95817 | 3  | 3 | 0 | 88845.04 | 504482.1 | 347970.9 |
| 400.1278 | 19.68183 | 19.67567 | 19.70183 | 5  | 5 | 0 | 95049.8  | 424686.4 | 286050.9 |
| 812.5654 | 32.67817 | 32.63767 | 32.734   | 8  | 3 | 5 | 127663.3 | 966196.2 | 806028.9 |
| 460.2779 | 43.2335  | 43.15933 | 43.26333 | 5  | 3 | 2 | 29631.64 | 170609.7 | 63763.07 |
| 375.162  | 33.5945  | 33.57067 | 33.597   | 4  | 0 | 4 | 703112.6 | 115086.7 | 38955.63 |

|          |          |          |          |    |   |   |          |          |          |
|----------|----------|----------|----------|----|---|---|----------|----------|----------|
| 177.0912 | 31.33092 | 31.301   | 31.35767 | 4  | 0 | 4 | 116933.1 | 300610   | 77543.74 |
| 374.15   | 31.97483 | 31.94083 | 32.173   | 5  | 1 | 4 | 289120.6 | 406930.9 | 93778.89 |
| 403.157  | 29.55367 | 29.5495  | 29.57867 | 3  | 0 | 3 | 96659.36 | 114344.4 | 61410.36 |
| 335.2495 | 37.00533 | 36.96133 | 37.00783 | 5  | 0 | 5 | 2305866  | 352367.7 | 84084.95 |
| 286.3109 | 33.01    | 32.9455  | 33.04317 | 8  | 4 | 4 | 32097.13 | 209245.9 | 82352.17 |
| 333.0559 | 37.12517 | 36.99117 | 37.143   | 3  | 0 | 3 | 45827.88 | 0        | 0        |
| 568.0979 | 31.33233 | 31.31433 | 31.6635  | 5  | 0 | 4 | 197045.2 | 234020.1 | 494817.6 |
| 355.2245 | 37.00533 | 36.97617 | 37.00783 | 5  | 0 | 5 | 3675107  | 204246.8 | 50342.02 |
| 179.1068 | 24.01733 | 24.01533 | 24.03267 | 4  | 0 | 4 | 250543.7 | 303220.3 | 43059.12 |
| 433.1674 | 37.00533 | 36.96133 | 37.00783 | 5  | 0 | 5 | 2869559  | 126714.7 | 43859.4  |
| 367.2486 | 22.01258 | 21.92583 | 22.03633 | 4  | 0 | 4 | 309799.7 | 291843.8 | 138321.2 |
| 447.8495 | 44.62175 | 44.58883 | 44.70217 | 10 | 5 | 5 | 150970.1 | 1460706  | 253712.9 |
| 258.8863 | 2.6521   | 2.450367 | 2.8541   | 4  | 1 | 3 | 213167.3 | 516611   | 223008.7 |
| 522.0957 | 33.1575  | 33.125   | 33.1865  | 4  | 0 | 4 | 320017.9 | 10707.03 | 7972.678 |
| 337.2377 | 23.58883 | 23.57517 | 23.60533 | 3  | 0 | 3 | 277992.3 | 391529.4 | 221093.8 |
| 854.5853 | 32.60175 | 32.57167 | 32.656   | 10 | 5 | 5 | 526948.3 | 4675246  | 3658295  |
| 217.1589 | 31.32358 | 31.31517 | 31.37217 | 4  | 0 | 4 | 116788   | 300910.9 | 99244.69 |
| 159.0454 | 37.014   | 36.96233 | 37.03467 | 4  | 0 | 4 | 95807.98 | 20636.95 | 14649.91 |
| 512.2874 | 23.20917 | 23.167   | 23.23833 | 5  | 0 | 5 | 829651.2 | 200483.9 | 118412.4 |
| 473.162  | 31.3345  | 31.31833 | 31.34217 | 3  | 3 | 0 | 117530.2 | 1491022  | 1090132  |
| 424.2057 | 22.1125  | 22.10083 | 22.159   | 3  | 3 | 0 | 82975.13 | 246660.4 | 176586   |
| 389.1623 | 25.76983 | 25.75883 | 25.776   | 3  | 0 | 3 | 54186.93 | 41712.73 | 15406.03 |
| 814.9334 | 26.57167 | 26.55617 | 26.65017 | 3  | 0 | 3 | 31854.36 | 4950.067 | 7373.399 |
| 284.2091 | 37.01333 | 37.00567 | 37.02283 | 4  | 0 | 4 | 76133.07 | 106172   | 20589.81 |
| 881.1671 | 41.19292 | 41.1485  | 41.23617 | 4  | 1 | 3 | 44847.63 | 19031.79 | 28162.9  |
| 349.2379 | 30.08617 | 30.0425  | 30.1135  | 5  | 0 | 5 | 2907616  | 97470.55 | 34725.29 |
| 661.963  | 43.31467 | 43.24833 | 43.33767 | 6  | 2 | 4 | 65395.71 | 154732.6 | 204660.4 |
| 578.2248 | 26.22192 | 26.209   | 26.24217 | 4  | 4 | 0 | 64154.2  | 241225   | 165805.9 |
| 417.1921 | 33.165   | 33.13983 | 33.1865  | 4  | 0 | 4 | 299351.5 | 123347.8 | 70928.63 |
| 303.2322 | 38.383   | 38.364   | 38.38883 | 3  | 0 | 3 | 458582.9 | 127711.5 | 10953.19 |
| 441.1341 | 31.322   | 31.30467 | 31.34333 | 4  | 0 | 4 | 147212.4 | 5332.113 | 3547.46  |
| 713.0104 | 42.94567 | 42.928   | 42.97367 | 10 | 5 | 5 | 118451.5 | 1102417  | 310726.5 |
| 630.2358 | 30.94008 | 30.91983 | 30.94733 | 4  | 4 | 0 | 68491.52 | 377193   | 272398.1 |
| 700.3425 | 31.34358 | 31.30467 | 31.37217 | 4  | 0 | 4 | 99378.39 | 10231.97 | 8606.302 |
| 336.2617 | 39.4495  | 39.39833 | 39.46133 | 3  | 0 | 3 | 2528626  | 131610.8 | 144433.4 |
| 336.0265 | 36.99875 | 36.99017 | 37.00783 | 4  | 0 | 4 | 62945.58 | 1391.212 | 1918.698 |
| 658.3388 | 20.61217 | 20.59867 | 20.7355  | 3  | 0 | 3 | 231057.5 | 14055.29 | 15723.35 |
| 293.0849 | 18.14192 | 18.11767 | 18.1585  | 4  | 3 | 1 | 156478.2 | 794178.2 | 482988.3 |
| 643.3464 | 22.83517 | 22.71733 | 22.87467 | 4  | 0 | 4 | 95091.98 | 21345.82 | 6836.815 |
| 319.5783 | 33.16458 | 33.13983 | 33.17267 | 4  | 0 | 4 | 86269.4  | 1907.933 | 3108.795 |
| 518.0792 | 31.32358 | 31.31517 | 31.37217 | 4  | 0 | 4 | 204348.2 | 5138.979 | 3193.271 |
| 280.0973 | 16.18831 | 16.14437 | 16.20643 | 10 | 5 | 5 | 999332.6 | 1045042  | 708424.2 |
| 310.2462 | 37.43567 | 37.42833 | 37.44717 | 4  | 0 | 4 | 155412.5 | 111137.8 | 54514.82 |
| 498.2721 | 20.255   | 20.24633 | 20.403   | 5  | 0 | 5 | 171100   | 45161.38 | 35951.75 |
| 596.0608 | 27.3245  | 27.31367 | 27.35483 | 3  | 0 | 3 | 44044.16 | 4881.6   | 6247.76  |
| 248.173  | 30.21925 | 30.16567 | 30.28133 | 4  | 0 | 4 | 37578.92 | 13006.16 | 10489.76 |
| 768.539  | 32.77258 | 32.69683 | 32.79833 | 8  | 3 | 5 | 186256.7 | 1401858  | 1166521  |

|          |          |          |          |    |   |   |          |          |          |
|----------|----------|----------|----------|----|---|---|----------|----------|----------|
| 441.3215 | 33.23017 | 33.17583 | 33.26167 | 7  | 2 | 5 | 676123.8 | 1244019  | 1117365  |
| 714.1742 | 30.94842 | 30.93717 | 30.95817 | 4  | 4 | 0 | 231604.7 | 1332416  | 957803   |
| 576.849  | 22.13383 | 22.07783 | 22.24567 | 6  | 1 | 5 | 248312.1 | 504132.2 | 781940.3 |
| 335.2583 | 38.87067 | 38.86367 | 38.88283 | 5  | 0 | 5 | 44755772 | 116764.4 | 37351.96 |
| 785.2689 | 43.58733 | 43.54783 | 43.63067 | 6  | 1 | 5 | 350590.9 | 479318.9 | 815358.2 |
| 389.1419 | 25.75517 | 25.71833 | 25.77333 | 3  | 0 | 3 | 229378.8 | 123941.4 | 118617   |
| 637.0127 | 31.34333 | 31.3185  | 31.37767 | 5  | 0 | 5 | 543899.3 | 11890.44 | 6978.271 |
| 342.2125 | 31.32358 | 31.301   | 31.32883 | 4  | 0 | 4 | 261598.6 | 28555.96 | 24585.01 |
| 390.17   | 37.03783 | 36.99017 | 37.04933 | 3  | 0 | 3 | 46332.55 | 541076.4 | 123679.4 |
| 764.1742 | 29.19992 | 29.11167 | 29.20017 | 4  | 4 | 0 | 79111.42 | 284397.4 | 212162.6 |
| 264.0686 | 21.76967 | 21.6765  | 21.779   | 5  | 0 | 5 | 1670903  | 71746.69 | 30854.37 |
| 437.1634 | 37.0055  | 36.96233 | 37.02283 | 4  | 0 | 4 | 103097.7 | 71852.17 | 49730.4  |
| 793.4441 | 33.69717 | 33.657   | 33.758   | 7  | 5 | 2 | 19624.1  | 103211.7 | 41833.52 |
| 293.1751 | 33.51333 | 33.18917 | 33.579   | 8  | 2 | 5 | 6189169  | 1226119  | 1311196  |
| 966.7224 | 44.33025 | 44.29217 | 44.344   | 10 | 5 | 5 | 260387.5 | 1809876  | 708267.9 |
| 405.982  | 18.14433 | 18.1395  | 18.189   | 3  | 3 | 0 | 32757.04 | 157504.8 | 99681.15 |
| 336.2617 | 38.87067 | 38.86367 | 38.88283 | 5  | 0 | 5 | 10498578 | 57604.55 | 56112.84 |
| 545.0939 | 31.3185  | 31.287   | 31.32883 | 3  | 0 | 3 | 55256.98 | 2541.543 | 4285.98  |
| 750.3902 | 43.59742 | 43.58783 | 43.61617 | 6  | 1 | 5 | 206149   | 686868   | 290008.4 |
| 621.2485 | 30.94733 | 30.93717 | 30.95817 | 3  | 3 | 0 | 108707.9 | 621748.2 | 460437.7 |
| 347.2223 | 25.06633 | 25.04083 | 25.08583 | 4  | 0 | 4 | 518289.8 | 173339.2 | 195548.8 |
| 453.6854 | 9.152767 | 9.132617 | 9.173283 | 4  | 1 | 3 | 1794072  | 4002312  | 1332789  |
| 447.3478 | 44.62175 | 44.58883 | 44.70217 | 10 | 5 | 5 | 346622.9 | 3708920  | 585645.4 |
| 365.2331 | 25.68617 | 25.66283 | 25.726   | 5  | 0 | 5 | 2194490  | 134161.1 | 55430.56 |
| 407.137  | 27.333   | 27.29967 | 27.38417 | 3  | 0 | 3 | 36141.14 | 13667.33 | 13175.22 |
| 309.2427 | 37.772   | 37.74233 | 37.78317 | 3  | 0 | 3 | 439895.9 | 139436.4 | 10941.98 |
| 778.549  | 42.60742 | 42.563   | 42.6505  | 10 | 5 | 5 | 110229.3 | 899671   | 288871.9 |
| 558.2342 | 27.56633 | 27.45517 | 27.72183 | 4  | 3 | 0 | 40741.47 | 215266.8 | 144684.2 |
| 167.0342 | 26.952   | 26.9435  | 26.99917 | 5  | 2 | 3 | 71601.49 | 588498.9 | 322913.2 |
| 303.2323 | 30.44717 | 30.42817 | 30.4565  | 3  | 0 | 3 | 154435.4 | 249624.4 | 190170.9 |
| 322.9204 | 33.17183 | 33.13983 | 33.1875  | 4  | 0 | 4 | 88488.02 | 38884.23 | 33085.99 |
| 400.3787 | 38.1825  | 38.13917 | 38.383   | 8  | 4 | 4 | 37828.96 | 458331.3 | 80176.12 |
| 810.5592 | 32.68192 | 32.6525  | 32.71783 | 10 | 5 | 5 | 1228654  | 10235233 | 8187096  |
| 475.1613 | 24.99133 | 24.98317 | 24.99517 | 3  | 0 | 3 | 39942.08 | 45266.62 | 26069.21 |
| 946.5596 | 43.6025  | 43.563   | 43.63067 | 7  | 2 | 5 | 91949.2  | 119495.8 | 129091.7 |
| 693.3668 | 31.31517 | 31.30467 | 31.34333 | 3  | 0 | 3 | 327224.2 | 18944.73 | 12948.58 |
| 349.1315 | 29.51467 | 29.4915  | 29.53483 | 4  | 0 | 4 | 106881.4 | 26387.14 | 38311.96 |
| 190.9877 | 2.85205  | 2.846317 | 2.85275  | 3  | 0 | 3 | 91112.48 | 200959.8 | 132065.4 |
| 524.1339 | 23.127   | 23.10367 | 23.21033 | 3  | 3 | 0 | 37472.95 | 81827.06 | 60516.15 |
| 686.9408 | 30.80617 | 30.74767 | 30.83517 | 4  | 1 | 3 | 63009.47 | 31189.75 | 69742.4  |
| 303.2321 | 39.46083 | 39.384   | 39.46133 | 3  | 0 | 3 | 1185091  | 164609.4 | 43670.91 |
| 486.1263 | 37.86158 | 37.83283 | 37.934   | 8  | 4 | 4 | 55044.48 | 655425.1 | 151383.3 |
| 348.1263 | 24.60733 | 24.586   | 24.62383 | 4  | 0 | 4 | 43639.46 | 6360.52  | 4703.26  |
| 179.1067 | 38.8865  | 38.86817 | 38.89767 | 4  | 0 | 4 | 582864.4 | 532770.7 | 73053.82 |
| 302.7395 | 36.99017 | 36.9765  | 37.00783 | 3  | 0 | 3 | 21546.45 | 0        | 0        |
| 407.152  | 35.61425 | 35.56183 | 35.666   | 4  | 0 | 4 | 141082.4 | 89356.22 | 35077.27 |
| 356.2279 | 37.0055  | 36.99183 | 37.00783 | 4  | 0 | 4 | 821060.5 | 82482.92 | 44689.05 |

|          |          |          |          |   |   |   |          |          |          |
|----------|----------|----------|----------|---|---|---|----------|----------|----------|
| 459.3514 | 33.249   | 33.20683 | 33.27383 | 7 | 2 | 5 | 603006.3 | 1104462  | 953419.3 |
| 504.1081 | 31.3435  | 31.30467 | 31.35783 | 3 | 0 | 3 | 82587.12 | 5731.908 | 7007.938 |
| 195.0847 | 36.99017 | 36.96233 | 37.02283 | 3 | 0 | 3 | 117699.2 | 1564025  | 189964.1 |
| 490.153  | 27.3635  | 27.3245  | 27.3695  | 3 | 0 | 3 | 29028.3  | 1237.729 | 1695.603 |
| 560.1034 | 31.66058 | 31.64017 | 31.94083 | 4 | 0 | 3 | 564301.5 | 57236.08 | 59566.59 |
| 534.2979 | 30.957   | 30.928   | 31.0515  | 6 | 5 | 1 | 111407.3 | 627353.2 | 365418.3 |
| 476.9239 | 22.13633 | 22.015   | 22.23133 | 8 | 2 | 5 | 481081.6 | 1270206  | 1756081  |
| 179.1068 | 33.17183 | 33.125   | 33.1875  | 4 | 0 | 4 | 368777.7 | 471314.2 | 27051.36 |
| 695.2505 | 23.01675 | 22.98967 | 23.03067 | 4 | 0 | 4 | 108120.3 | 7521.726 | 3743.505 |
| 649.4617 | 43.60183 | 43.578   | 43.63217 | 6 | 1 | 5 | 78988.93 | 141555   | 150028.8 |
| 301.2167 | 31.95858 | 31.94083 | 32.0005  | 4 | 0 | 4 | 840579.1 | 287248.8 | 54280.04 |
| 514.8616 | 16.2994  | 16.2228  | 16.31143 | 4 | 0 | 4 | 216521.8 | 573745   | 503134   |
| 410.2905 | 19.43767 | 19.3935  | 19.44267 | 3 | 0 | 3 | 47022.3  | 9206.084 | 11807.58 |
| 349.2015 | 26.07467 | 26.05033 | 26.07667 | 3 | 0 | 3 | 304532.3 | 79431.36 | 42411.18 |
| 590.9026 | 32.15417 | 32.044   | 32.2095  | 4 | 1 | 3 | 33491.86 | 36698.11 | 45829.65 |
| 780.0485 | 38.88283 | 38.86367 | 38.8975  | 3 | 0 | 3 | 53985.62 | 4007.292 | 5077.339 |
| 563.1226 | 33.16475 | 33.13983 | 33.17183 | 4 | 0 | 4 | 280810.8 | 6569.311 | 5250.657 |
| 246.5976 | 23.7785  | 23.76533 | 23.812   | 6 | 1 | 5 | 70494.53 | 51631.65 | 76447.62 |
| 331.2271 | 35.24283 | 35.15933 | 35.30933 | 4 | 0 | 4 | 269416.1 | 123456.2 | 45038.44 |
| 594.2297 | 30.95233 | 30.93717 | 30.96417 | 4 | 4 | 0 | 171787   | 1186680  | 896427.8 |
| 215.6056 | 38.88283 | 38.85333 | 38.88733 | 4 | 0 | 4 | 209650.2 | 2204.963 | 2139.911 |
| 608.2516 | 29.2135  | 29.18517 | 29.24733 | 7 | 5 | 2 | 333751.1 | 2021393  | 1313262  |
| 595.0779 | 26.57017 | 26.56017 | 26.62083 | 3 | 0 | 3 | 35291.7  | 5843.617 | 5728.935 |
| 491.1801 | 26.43658 | 26.39833 | 26.4595  | 4 | 1 | 3 | 44715.58 | 55722.44 | 67189.95 |
| 672.5265 | 33.55817 | 33.5305  | 33.58283 | 6 | 1 | 5 | 700486.4 | 597805   | 613479.5 |
| 246.0959 | 23.78483 | 23.76133 | 23.8115  | 7 | 2 | 5 | 317961.3 | 412862.2 | 587443.6 |
| 474.7109 | 31.31475 | 31.29983 | 31.3185  | 4 | 0 | 4 | 145511.7 | 26916.49 | 54839.68 |
| 350.1498 | 31.17383 | 31.1685  | 31.20183 | 4 | 0 | 4 | 36242.58 | 7271.854 | 10729.79 |
| 418.2806 | 21.91667 | 21.78383 | 21.93617 | 3 | 0 | 3 | 152831.2 | 138945.9 | 59475.06 |
| 736.9379 | 31.32933 | 31.31433 | 31.36317 | 5 | 0 | 5 | 425913.5 | 8140.874 | 7389.463 |
| 667.3327 | 43.59317 | 43.57267 | 43.6025  | 3 | 0 | 3 | 113862.8 | 235846.9 | 275199.5 |
| 337.0469 | 38.8755  | 38.86367 | 38.88283 | 4 | 0 | 4 | 160916.4 | 1137.167 | 1589.85  |
| 307.0631 | 19.08533 | 19.07017 | 19.10083 | 3 | 0 | 3 | 196889.9 | 11839.57 | 7026.602 |
| 489.0837 | 37.88033 | 37.8545  | 37.88767 | 4 | 4 | 0 | 41050.37 | 336321.4 | 201432.4 |
| 512.1641 | 10.68095 | 10.64782 | 10.75237 | 8 | 3 | 5 | 2919559  | 9122044  | 4750419  |
| 578.277  | 27.44817 | 27.43983 | 27.53083 | 5 | 4 | 1 | 88482.94 | 623992   | 295637.6 |
| 411.1836 | 21.04217 | 21.023   | 21.3215  | 4 | 0 | 3 | 378663.7 | 308545.4 | 144353.1 |
| 284.1578 | 19.20767 | 19.205   | 19.23183 | 3 | 0 | 3 | 33439.27 | 27931.38 | 8341.172 |
| 368.2606 | 22.035   | 21.94167 | 22.18317 | 3 | 0 | 3 | 70276.9  | 14801.17 | 18446.4  |
| 414.0723 | 30.41908 | 30.33317 | 30.44967 | 6 | 1 | 5 | 191337.5 | 238104.4 | 480181.7 |
| 779.0504 | 42.59267 | 42.54167 | 42.66483 | 5 | 2 | 3 | 57256.58 | 247172.4 | 72486.07 |
| 338.2694 | 33.1865  | 33.16333 | 33.2025  | 5 | 0 | 5 | 541648.7 | 62532.38 | 92534.85 |
| 363.2172 | 21.58658 | 21.45517 | 21.59583 | 4 | 0 | 4 | 531977.8 | 133054.8 | 26931.54 |
| 302.2197 | 37.59483 | 37.57683 | 37.599   | 3 | 0 | 3 | 280703.6 | 394511.6 | 53303.87 |
| 353.2692 | 26.11208 | 26.08517 | 26.15883 | 6 | 1 | 5 | 924353.8 | 222265.9 | 276582.5 |
| 764.0189 | 31.3185  | 31.31517 | 31.4155  | 3 | 0 | 3 | 73042.76 | 1799.884 | 4024.663 |
| 394.3318 | 38.88283 | 38.8755  | 38.88283 | 3 | 0 | 3 | 86072.13 | 20622.29 | 11974.89 |



|          |          |          |          |    |   |   |          |          |          |
|----------|----------|----------|----------|----|---|---|----------|----------|----------|
| 568.0697 | 24.01817 | 24.00033 | 24.0475  | 3  | 0 | 3 | 38737.02 | 7363.692 | 11861.2  |
| 826.0209 | 10.67418 | 10.6177  | 10.77118 | 4  | 0 | 4 | 188373.5 | 84300.62 | 152239.7 |
| 333.4837 | 38.8755  | 38.86367 | 38.88283 | 4  | 0 | 4 | 163445   | 1814.298 | 2601.888 |
| 336.2619 | 38.379   | 38.346   | 38.403   | 3  | 0 | 3 | 1384880  | 56248.23 | 41508.35 |
| 606.2545 | 29.20675 | 29.19917 | 29.3435  | 8  | 5 | 3 | 593204.3 | 3851239  | 2589362  |
| 898.6117 | 32.5555  | 32.5135  | 32.581   | 8  | 3 | 5 | 373275.3 | 2196482  | 1471909  |
| 281.0476 | 14.23448 | 14.17657 | 14.25975 | 5  | 0 | 5 | 777953.9 | 228432.6 | 349598.3 |
| 618.426  | 43.60183 | 43.54333 | 43.64517 | 10 | 5 | 5 | 394831.1 | 2520992  | 1603305  |
| 403.1208 | 25.40208 | 25.393   | 25.4035  | 4  | 0 | 4 | 307440.3 | 242081.8 | 514326.8 |
| 691.367  | 31.32867 | 31.301   | 31.37767 | 5  | 0 | 5 | 3872541  | 20250.23 | 8142.72  |
| 375.2473 | 31.31683 | 31.31433 | 31.34333 | 4  | 0 | 4 | 59741.7  | 72186.6  | 25488.48 |
| 725.5153 | 32.82717 | 32.75017 | 32.84417 | 4  | 1 | 3 | 50776.19 | 100989.8 | 110344.3 |
| 429.3003 | 41.739   | 41.67167 | 41.7745  | 10 | 5 | 5 | 146569.9 | 1493405  | 238106.6 |
| 483.1131 | 44.30692 | 44.29767 | 44.30717 | 4  | 1 | 3 | 36527.45 | 25631.82 | 42752.67 |
| 262.0867 | 23.03933 | 23.01867 | 23.06    | 4  | 0 | 4 | 154464.8 | 49615.83 | 24364.27 |
| 391.296  | 16.36978 | 16.3671  | 16.3784  | 3  | 0 | 3 | 209889.8 | 3229906  | 1212908  |
| 368.234  | 18.72258 | 18.70033 | 18.74317 | 4  | 0 | 4 | 421207.9 | 207756.7 | 77151.65 |
| 307.2273 | 36.433   | 36.407   | 36.48633 | 4  | 0 | 4 | 233207.5 | 183163.2 | 38060.19 |
| 514.1609 | 10.66473 | 10.57787 | 10.77118 | 7  | 4 | 3 | 1723674  | 5053854  | 2942907  |
| 551.4355 | 43.59758 | 43.58667 | 43.6335  | 10 | 5 | 5 | 394439.2 | 3099838  | 1828736  |
| 331.2272 | 30.47283 | 30.45867 | 30.51467 | 4  | 0 | 4 | 543172.9 | 271809.2 | 189770.2 |
| 332.1563 | 38.12092 | 38.09867 | 38.14517 | 4  | 4 | 0 | 56147.42 | 361597.8 | 193260   |
| 601.0682 | 24.018   | 24.00183 | 24.03283 | 3  | 0 | 3 | 46360.01 | 10899.42 | 17683.9  |
| 581.0982 | 37.04358 | 36.97717 | 37.065   | 4  | 0 | 4 | 60502.29 | 6466.949 | 8716.637 |
| 321.9003 | 31.30467 | 31.301   | 31.34333 | 3  | 0 | 3 | 35092.24 | 56118.5  | 44964.81 |
| 237.1851 | 33.1865  | 33.17183 | 33.1875  | 3  | 0 | 3 | 110514.7 | 212351.2 | 71199.24 |
| 349.2375 | 38.85333 | 38.8515  | 38.88283 | 3  | 0 | 3 | 97886.21 | 137625.3 | 47614.27 |
| 338.2691 | 38.8535  | 38.83883 | 38.86817 | 3  | 0 | 3 | 40789.11 | 16032.66 | 15034.87 |
| 314.7584 | 30.41683 | 30.34733 | 30.47133 | 7  | 3 | 4 | 41677.67 | 79935.76 | 84939.81 |
| 404.7867 | 10.38887 | 10.36155 | 10.41848 | 4  | 1 | 3 | 163515.6 | 219652.7 | 246672.7 |
| 323.2584 | 34.65483 | 34.6225  | 34.68933 | 4  | 0 | 4 | 300791.9 | 133149.5 | 79550.15 |
| 482.3615 | 32.00058 | 31.96717 | 32.044   | 8  | 5 | 3 | 484530.3 | 2471504  | 1505914  |
| 383.1469 | 31.34333 | 31.31433 | 31.36317 | 5  | 0 | 5 | 227853.4 | 33405.21 | 21097.76 |
| 1449.005 | 42.81533 | 42.747   | 42.88067 | 7  | 2 | 5 | 63869.59 | 126985   | 124762.8 |
| 519.0971 | 33.17183 | 33.125   | 33.1875  | 4  | 0 | 4 | 157166.8 | 132490.7 | 115118.8 |
| 562.8697 | 25.697   | 25.60383 | 25.71367 | 5  | 1 | 4 | 56349.14 | 39949.26 | 62422.57 |
| 335.2223 | 24.846   | 24.82983 | 24.85883 | 5  | 0 | 5 | 1175670  | 304752.1 | 266370   |
| 379.2121 | 24.879   | 24.74117 | 24.947   | 6  | 0 | 5 | 2246685  | 238552.3 | 56982.69 |
| 492.346  | 31.64017 | 31.627   | 31.689   | 5  | 2 | 3 | 53663.07 | 339460.9 | 137817.4 |
| 606.2346 | 26.86717 | 26.849   | 26.86817 | 3  | 3 | 0 | 25971.79 | 102223.3 | 74524.19 |
| 319.2271 | 23.62667 | 23.6005  | 23.63467 | 5  | 0 | 5 | 683228.1 | 373847.5 | 355542.1 |
| 778.0474 | 42.59817 | 42.576   | 42.63367 | 10 | 5 | 5 | 247919.5 | 2033844  | 690979.5 |
| 307.0744 | 13.68223 | 13.59352 | 13.73812 | 3  | 0 | 3 | 53389.14 | 32453.78 | 51559.16 |
| 485.3477 | 33.21575 | 33.184   | 33.2765  | 6  | 1 | 5 | 649286.6 | 1512901  | 1377532  |
| 565.2037 | 23.22025 | 23.20917 | 23.23833 | 4  | 0 | 4 | 96593.85 | 6170.653 | 5119.903 |
| 381.1487 | 31.34333 | 31.31517 | 31.36317 | 5  | 0 | 5 | 476595.9 | 111035.4 | 152555   |
| 415.2523 | 24.024   | 24.00183 | 24.03283 | 4  | 0 | 4 | 282828.8 | 51293.84 | 13007.52 |

|          |          |          |          |    |   |   |          |          |          |
|----------|----------|----------|----------|----|---|---|----------|----------|----------|
| 616.4289 | 43.60225 | 43.572   | 43.61833 | 10 | 5 | 5 | 774066.8 | 4891573  | 2922903  |
| 528.3021 | 43.6095  | 43.58967 | 43.71083 | 4  | 1 | 3 | 107654.4 | 2410147  | 590031.8 |
| 692.3703 | 31.32358 | 31.301   | 31.34333 | 4  | 0 | 4 | 1797282  | 169081.3 | 68868.66 |
| 606.2386 | 27.441   | 27.43983 | 27.45633 | 3  | 3 | 0 | 32820.15 | 153776.6 | 112331.4 |
| 708.8011 | 25.67808 | 25.65317 | 25.73317 | 4  | 1 | 3 | 50562.77 | 49432.17 | 108565.4 |
| 539.0303 | 33.51817 | 33.50617 | 33.5675  | 4  | 0 | 4 | 94278.18 | 16494.06 | 17458.52 |
| 522.0816 | 31.32392 | 31.29983 | 31.35767 | 4  | 0 | 4 | 93342.23 | 15549.23 | 10884.99 |
| 491.0817 | 41.71667 | 41.68767 | 41.74433 | 7  | 5 | 2 | 27482.09 | 282952   | 79395.74 |
| 372.1502 | 31.32883 | 31.31517 | 31.36317 | 5  | 0 | 5 | 266804.9 | 371227.8 | 396997   |
| 347.2583 | 38.515   | 38.51267 | 38.53    | 3  | 0 | 3 | 315303.9 | 38090.85 | 18335.11 |
| 480.6826 | 42.93242 | 42.88767 | 42.99867 | 10 | 5 | 5 | 119064.8 | 933259.2 | 246302.3 |
| 219.1744 | 38.88283 | 38.8755  | 38.8975  | 3  | 0 | 3 | 88859.31 | 44205.55 | 29300.26 |
| 199.6039 | 31.3185  | 31.25867 | 31.38667 | 3  | 0 | 3 | 69747.01 | 4753.435 | 3983.484 |
| 393.1729 | 26.9435  | 26.92167 | 26.94683 | 3  | 0 | 3 | 202989.9 | 160266.9 | 27351.38 |
| 374.1421 | 25.61867 | 25.577   | 25.64017 | 6  | 2 | 4 | 122185.3 | 233984.6 | 410040.4 |
| 445.2549 | 26.952   | 26.919   | 27.017   | 3  | 0 | 3 | 44917.97 | 119141.8 | 50886.82 |
| 294.1784 | 33.51083 | 33.49617 | 33.5675  | 5  | 0 | 5 | 1145677  | 272485.2 | 81594.96 |
| 747.1943 | 29.26633 | 29.2425  | 29.32917 | 4  | 1 | 3 | 113050.6 | 105542.5 | 121599.9 |
| 315.2322 | 37.01275 | 36.97717 | 37.02283 | 4  | 0 | 4 | 133549.8 | 319310.8 | 68845.7  |
| 264.873  | 2.504067 | 2.48605  | 2.526517 | 3  | 0 | 3 | 258773.5 | 39488.33 | 22007.62 |
| 627.3269 | 23.1515  | 23.136   | 23.23833 | 3  | 0 | 3 | 31672.54 | 15620.75 | 13436.16 |
| 347.2583 | 39.07675 | 39.05    | 39.10433 | 4  | 0 | 4 | 298523.6 | 54817.53 | 24852.46 |
| 243.1594 | 22.70417 | 22.70033 | 22.7235  | 3  | 0 | 3 | 52565.38 | 126090.6 | 73861.5  |
| 534.1252 | 33.1865  | 33.14233 | 33.1875  | 3  | 0 | 3 | 49971.24 | 3667.666 | 6360.329 |
| 339.2172 | 24.32967 | 24.29833 | 24.35767 | 5  | 0 | 5 | 503833.8 | 66378.49 | 19332.27 |
| 663.2295 | 25.726   | 25.71833 | 25.72967 | 3  | 0 | 3 | 44388.57 | 0        | 0        |
| 331.1107 | 21.71783 | 21.66433 | 21.744   | 4  | 4 | 0 | 61272.51 | 259827.6 | 155261.7 |
| 379.2121 | 26.10392 | 26.07917 | 26.13683 | 4  | 0 | 4 | 633563.4 | 143039.4 | 56724.48 |
| 328.2001 | 10.68362 | 10.63728 | 10.77118 | 7  | 4 | 3 | 192511   | 284165.1 | 137689   |
| 408.7878 | 2.648333 | 2.557617 | 2.806883 | 3  | 0 | 3 | 331231.6 | 519399.5 | 127329.8 |
| 786.2001 | 30.25317 | 30.23183 | 30.3055  | 5  | 4 | 1 | 34182.61 | 202712   | 98634.65 |
| 536.1036 | 31.20683 | 31.19783 | 31.216   | 3  | 0 | 3 | 68556.45 | 5704.643 | 4176.652 |
| 778.0326 | 37.01408 | 36.97717 | 37.03467 | 4  | 0 | 4 | 107721.1 | 2966.16  | 3039.431 |
| 304.2355 | 38.8755  | 38.86367 | 38.89767 | 4  | 0 | 4 | 1170846  | 1156306  | 207655.7 |
| 411.231  | 43.55983 | 43.5435  | 43.61617 | 5  | 2 | 3 | 84395.47 | 384153.1 | 95473.73 |
| 549.4021 | 43.87192 | 43.835   | 43.93067 | 10 | 5 | 5 | 352231   | 4062484  | 962005.6 |
| 597.3834 | 43.61092 | 43.58667 | 43.61833 | 4  | 4 | 0 | 81456.62 | 434673   | 310485.8 |
| 305.248  | 35.06333 | 35.0405  | 35.08833 | 4  | 0 | 4 | 612306.4 | 395615.2 | 317988.3 |
| 249.1488 | 23.76358 | 23.75067 | 23.7675  | 4  | 0 | 4 | 302213.3 | 56331.17 | 17403.69 |
| 284.1177 | 22.11725 | 22.05267 | 22.14983 | 10 | 5 | 5 | 133221.9 | 803879.7 | 444697.6 |
| 181.0497 | 33.5305  | 33.49617 | 33.58317 | 7  | 2 | 5 | 651265.9 | 159822.9 | 84273.2  |
| 519.3255 | 30.95217 | 30.943   | 31.0515  | 9  | 5 | 4 | 530510.8 | 3255652  | 2145176  |
| 604.2411 | 27.4605  | 27.441   | 27.51567 | 5  | 4 | 1 | 52792.11 | 363214.6 | 266080   |
| 352.2848 | 39.20167 | 39.172   | 39.25283 | 3  | 0 | 3 | 139285.6 | 18502.53 | 13958.3  |
| 335.6685 | 37.02017 | 37.00567 | 37.02283 | 3  | 0 | 3 | 30140.65 | 0        | 0        |
| 294.047  | 10.98168 | 10.83542 | 11.10782 | 8  | 2 | 5 | 613281.5 | 72891.17 | 75757.02 |
| 228.1313 | 14.2379  | 14.23448 | 14.2452  | 3  | 0 | 3 | 47583.2  | 15931.94 | 20024.39 |

|          |          |          |          |    |   |   |          |          |          |
|----------|----------|----------|----------|----|---|---|----------|----------|----------|
| 676.2372 | 29.20017 | 29.18517 | 29.215   | 3  | 3 | 0 | 50179.21 | 258004.8 | 177701.5 |
| 338.2696 | 33.5675  | 33.54533 | 33.578   | 5  | 0 | 5 | 301992.5 | 28060.4  | 25989.98 |
| 290.2484 | 35.39858 | 35.327   | 35.45783 | 4  | 1 | 3 | 83693.34 | 668020.3 | 316825.1 |
| 591.0072 | 31.32867 | 31.301   | 31.34333 | 3  | 0 | 3 | 288504.2 | 4322.349 | 2984.076 |
| 435.0273 | 30.9935  | 30.96517 | 31.07967 | 5  | 1 | 4 | 84931.86 | 90316.62 | 196867.9 |
| 345.1827 | 35.62117 | 35.54583 | 35.666   | 3  | 0 | 3 | 30439.82 | 230445.5 | 82832.45 |
| 420.2972 | 10.30393 | 10.22325 | 10.33708 | 4  | 1 | 3 | 182979.7 | 113964.3 | 99143.27 |
| 587.0652 | 31.29983 | 31.287   | 31.35767 | 3  | 0 | 3 | 75325.94 | 17894.96 | 17027.44 |
| 566.1151 | 33.16308 | 33.11267 | 33.17267 | 4  | 0 | 4 | 67656.36 | 2580.123 | 3539.881 |
| 403.3616 | 32.65208 | 32.5785  | 32.71783 | 8  | 4 | 4 | 29109.64 | 187717.4 | 46700.79 |
| 467.0459 | 27.22633 | 27.186   | 27.252   | 3  | 0 | 3 | 32400.06 | 3756.328 | 5559.935 |
| 649.0354 | 31.35767 | 31.32867 | 31.36017 | 3  | 0 | 3 | 93278.66 | 44995.92 | 88036.06 |
| 241.5733 | 23.01883 | 23.01867 | 23.04483 | 3  | 0 | 3 | 81552.59 | 17290.43 | 19357.88 |
| 377.1778 | 35.09983 | 35.02583 | 35.11583 | 5  | 0 | 5 | 1198610  | 130027.1 | 51263.16 |
| 151.1117 | 37.61417 | 37.59483 | 37.62133 | 3  | 0 | 3 | 103018.3 | 288423.6 | 54281.04 |
| 343.1208 | 22.64358 | 22.635   | 22.66167 | 4  | 0 | 4 | 79370.88 | 41178.41 | 13314.2  |
| 448.9289 | 22.13633 | 22.02933 | 22.24567 | 8  | 2 | 5 | 317233.7 | 703787.8 | 989801   |
| 433.1676 | 37.59333 | 37.56117 | 37.599   | 4  | 0 | 4 | 504564.5 | 137214.7 | 57327.38 |
| 503.3776 | 33.23017 | 33.16933 | 33.26167 | 7  | 2 | 5 | 963352.6 | 1978928  | 1753629  |
| 716.1728 | 30.93483 | 30.91983 | 30.943   | 4  | 4 | 0 | 218552.3 | 1040702  | 836187.4 |
| 491.1843 | 23.79408 | 23.73017 | 23.8115  | 8  | 3 | 5 | 671169.3 | 975321.3 | 1461716  |
| 738.9384 | 31.333   | 31.32867 | 31.37217 | 4  | 0 | 4 | 143219.9 | 8604.543 | 4627.509 |
| 333.8381 | 38.87183 | 38.86817 | 38.88283 | 4  | 0 | 4 | 73178.72 | 3726.906 | 4284.803 |
| 704.1856 | 30.95867 | 30.943   | 31.07383 | 10 | 5 | 5 | 282596.3 | 2173999  | 879534   |
| 425.0109 | 22.11867 | 22.11533 | 22.12267 | 3  | 3 | 0 | 30321.15 | 200244.8 | 74789.38 |
| 395.2071 | 20.715   | 20.7015  | 20.7515  | 5  | 0 | 5 | 117988   | 109915.9 | 103487.7 |
| 357.2402 | 38.88283 | 38.86367 | 38.88283 | 4  | 0 | 4 | 2081445  | 309795   | 109025.4 |
| 791.2922 | 31.32358 | 31.301   | 31.34333 | 4  | 0 | 4 | 2194621  | 2204.162 | 3026.749 |
| 335.0151 | 37.599   | 37.59483 | 37.6065  | 3  | 0 | 3 | 65897.43 | 6160.566 | 4665.329 |
| 603.2466 | 27.45633 | 27.45517 | 27.4565  | 3  | 3 | 0 | 24479.03 | 107223.3 | 78771.43 |
| 712.1862 | 30.957   | 30.922   | 31.04533 | 8  | 5 | 3 | 193700.1 | 1264098  | 747027.2 |
| 518.3224 | 30.95867 | 30.943   | 31.07383 | 10 | 5 | 5 | 2192101  | 14791693 | 9733446  |
| 387.0783 | 30.84733 | 30.74683 | 30.88867 | 9  | 4 | 5 | 659394.3 | 4673956  | 2532941  |
| 431.1715 | 24.8385  | 24.8285  | 24.86083 | 3  | 0 | 3 | 76759.99 | 33046.13 | 14545.61 |
| 308.2306 | 35.6465  | 35.56183 | 35.68083 | 5  | 0 | 5 | 679862.4 | 291351.4 | 85835.27 |
| 659.4783 | 34.7515  | 34.72933 | 34.786   | 4  | 3 | 1 | 269379.6 | 504062.2 | 241879.5 |
| 510.3183 | 29.22575 | 29.163   | 29.27183 | 6  | 2 | 4 | 89386.8  | 595480.8 | 283590.2 |
| 153.9484 | 31.63542 | 31.34883 | 31.72167 | 4  | 3 | 0 | 247786.2 | 5183317  | 3226605  |
| 631.2575 | 29.11767 | 29.09717 | 29.149   | 6  | 5 | 1 | 188871.8 | 696317.3 | 535451.8 |
| 333.243  | 38.67683 | 38.42133 | 38.85333 | 5  | 0 | 4 | 2229177  | 86325.73 | 19563.64 |
| 654.2555 | 29.22225 | 29.18433 | 29.23017 | 4  | 4 | 0 | 72158.48 | 317505.6 | 251713.7 |
| 1207.742 | 43.58783 | 43.53283 | 43.602   | 7  | 2 | 5 | 187176.6 | 244914.5 | 349113.8 |
| 884.1652 | 41.193   | 41.16333 | 41.23617 | 7  | 2 | 5 | 142821.5 | 158762.1 | 199984.4 |
| 387.2941 | 28.94333 | 28.92233 | 28.995   | 4  | 0 | 4 | 79257.44 | 80090.95 | 68386.25 |
| 427.9813 | 14.25975 | 14.23448 | 14.28628 | 3  | 0 | 3 | 28559.48 | 3301.643 | 4011.855 |
| 389.1415 | 24.853   | 24.815   | 24.86083 | 5  | 0 | 5 | 411606   | 93664.7  | 94738.34 |
| 376.1502 | 31.31917 | 31.31517 | 31.32883 | 5  | 0 | 5 | 396792.2 | 658340.6 | 249532   |

|          |          |          |          |    |   |   |          |          |          |
|----------|----------|----------|----------|----|---|---|----------|----------|----------|
| 695.363  | 31.32358 | 31.31517 | 31.34333 | 4  | 0 | 4 | 165058.9 | 13324.39 | 14020.31 |
| 471.1955 | 20.53883 | 20.47467 | 20.7355  | 4  | 1 | 3 | 134069.5 | 259460.9 | 159461.3 |
| 1445.973 | 43.60167 | 43.578   | 43.6025  | 6  | 1 | 5 | 100510.8 | 97415.96 | 133801.9 |
| 475.0871 | 33.1865  | 33.14283 | 33.21583 | 3  | 0 | 3 | 49764.63 | 9283.763 | 16467.05 |
| 486.3509 | 33.21133 | 33.15433 | 33.23667 | 4  | 1 | 3 | 159066.3 | 302510.1 | 165665.1 |
| 339.2538 | 21.03583 | 20.97717 | 21.0915  | 5  | 0 | 5 | 677388.1 | 36200.99 | 14904.84 |
| 598.4897 | 43.0185  | 42.98217 | 43.03883 | 8  | 4 | 4 | 53772.72 | 252291.5 | 96933.73 |
| 916.6002 | 43.58967 | 43.573   | 43.60167 | 7  | 2 | 5 | 167245.2 | 247194.1 | 231743.4 |
| 331.484  | 37.599   | 37.58017 | 37.6065  | 3  | 0 | 3 | 61703.8  | 912.7126 | 2040.888 |
| 161.0961 | 38.89767 | 38.88733 | 38.91233 | 3  | 0 | 3 | 147092   | 79531.97 | 11816.35 |
| 598.3622 | 9.36625  | 9.188017 | 9.387533 | 3  | 0 | 3 | 7642986  | 1672732  | 1458435  |
| 1054.775 | 44.03417 | 43.99667 | 44.04467 | 9  | 4 | 5 | 268279.1 | 1814664  | 822825.2 |
| 1361.956 | 43.08358 | 43.02517 | 43.10017 | 10 | 5 | 5 | 123955.3 | 523526   | 449633.2 |
| 855.5887 | 32.60833 | 32.571   | 32.65333 | 8  | 3 | 5 | 240861.3 | 2140906  | 1647071  |
| 512.2409 | 20.40917 | 20.3615  | 20.59983 | 6  | 5 | 1 | 91214.96 | 476813.4 | 282639.6 |
| 560.1036 | 31.32867 | 31.301   | 31.36317 | 5  | 0 | 5 | 1326447  | 79033.89 | 58428.14 |
| 305.545  | 23.19583 | 23.1585  | 23.20917 | 5  | 1 | 4 | 70208.33 | 63079.79 | 135829.4 |
| 579.0979 | 37.00658 | 36.97717 | 37.02017 | 4  | 0 | 4 | 544442.6 | 8152.464 | 2692.417 |
| 1000.504 | 43.58817 | 43.55817 | 43.61733 | 6  | 2 | 4 | 44597.86 | 73698.49 | 62867.08 |
| 551.1031 | 37.0215  | 36.97717 | 37.03517 | 4  | 0 | 4 | 121647.5 | 4203.965 | 2990.72  |
| 501.086  | 37.40483 | 37.40167 | 37.42333 | 3  | 3 | 0 | 30801.17 | 150140.2 | 112038.3 |
| 373.6481 | 31.32358 | 31.301   | 31.34333 | 4  | 0 | 4 | 150429.6 | 562.1375 | 1256.978 |
| 416.1736 | 31.61283 | 31.612   | 31.649   | 3  | 0 | 3 | 103566.8 | 124189.1 | 63746.14 |
| 217.5852 | 24.32783 | 24.29833 | 24.35767 | 3  | 0 | 3 | 35838.39 | 2601.303 | 3688.207 |
| 336.6875 | 38.87917 | 38.86817 | 38.88283 | 4  | 0 | 4 | 74960.09 | 1667.012 | 1626.623 |
| 336.2531 | 37.04375 | 37.00533 | 37.06583 | 4  | 0 | 4 | 80178.84 | 19239.26 | 6540.113 |
| 366.2475 | 10.67446 | 10.63357 | 10.77118 | 6  | 3 | 3 | 117862.5 | 257892.9 | 156908.7 |
| 636.0057 | 31.32867 | 31.30467 | 31.32883 | 3  | 0 | 3 | 91383.02 | 5000.713 | 3506.225 |
| 385.065  | 31.00858 | 30.93567 | 31.07967 | 4  | 1 | 3 | 106313.5 | 120216.5 | 257236.1 |
| 152.1151 | 36.99867 | 36.962   | 37.02283 | 4  | 0 | 4 | 63840.43 | 29571.33 | 13842.58 |
| 517.0506 | 37.45567 | 37.38067 | 37.47317 | 5  | 1 | 4 | 27403.28 | 48418.73 | 75765.9  |
| 364.2205 | 22.54708 | 22.49    | 22.54783 | 4  | 0 | 4 | 508439.7 | 756741.8 | 327389.7 |
| 1096.795 | 43.87933 | 43.8495  | 43.8995  | 10 | 5 | 5 | 1292830  | 8929329  | 4853770  |
| 335.2222 | 29.49083 | 29.448   | 29.49433 | 3  | 0 | 3 | 123320.1 | 165546.2 | 95719.3  |
| 335.2222 | 27.53083 | 27.50083 | 27.54533 | 3  | 0 | 3 | 196449.1 | 226075.5 | 53598.93 |
| 402.1267 | 19.68767 | 19.67567 | 19.69817 | 5  | 5 | 0 | 62584.59 | 242273.9 | 143883.2 |
| 213.1489 | 11.14173 | 10.90787 | 11.23985 | 7  | 1 | 4 | 507336.8 | 2160878  | 1607005  |
| 356.2277 | 37.59483 | 37.57683 | 37.599   | 3  | 0 | 3 | 153179.5 | 66188.43 | 28347.03 |
| 530.0936 | 25.79567 | 25.75517 | 25.80217 | 4  | 0 | 4 | 42977.94 | 5018.195 | 7649.751 |
| 595.2332 | 30.922   | 30.918   | 30.93483 | 3  | 3 | 0 | 60443.81 | 244080   | 197461.3 |
| 180.11   | 38.8925  | 38.88283 | 38.89783 | 4  | 0 | 4 | 50484.38 | 16023.6  | 10660.77 |
| 580.1009 | 37.0055  | 36.97717 | 37.05283 | 4  | 0 | 4 | 139609.7 | 3672.609 | 2270.68  |
| 376.1654 | 33.15717 | 33.13417 | 33.1875  | 5  | 0 | 5 | 1125076  | 932366   | 284110.8 |
| 367.2484 | 23.76683 | 23.736   | 23.776   | 4  | 0 | 4 | 333469.7 | 322843.8 | 159966.4 |
| 756.0342 | 42.71283 | 42.66967 | 42.74967 | 10 | 5 | 5 | 427366.9 | 3469592  | 1135816  |
| 323.2221 | 31.90025 | 31.854   | 31.92733 | 4  | 0 | 4 | 171088.6 | 261020.6 | 83811.58 |
| 243.091  | 22.09933 | 22.005   | 22.12267 | 6  | 5 | 1 | 74993.37 | 347790.9 | 164935.7 |

|          |          |          |          |   |   |   |          |          |          |
|----------|----------|----------|----------|---|---|---|----------|----------|----------|
| 436.3064 | 21.44267 | 21.3015  | 21.45483 | 4 | 1 | 3 | 45638.71 | 335320.5 | 151681.3 |
| 269.2116 | 25.52133 | 25.50317 | 25.54033 | 4 | 0 | 4 | 417799.8 | 522478.5 | 333619.5 |
| 378.1004 | 19.21417 | 19.205   | 19.247   | 5 | 0 | 5 | 562795.4 | 131775.5 | 216121.8 |
| 460.8919 | 16.68417 | 16.63233 | 16.70467 | 3 | 0 | 3 | 27424.56 | 6562.43  | 6676.779 |
| 514.0231 | 30.777   | 30.64783 | 30.80633 | 3 | 0 | 3 | 37264.04 | 16904.39 | 24946.12 |
| 258.5604 | 33.2025  | 33.17183 | 33.21583 | 3 | 0 | 3 | 51526.33 | 606.5451 | 1356.276 |
| 223.9803 | 4.112683 | 3.966233 | 4.149983 | 3 | 0 | 3 | 455257.8 | 203220.3 | 148955.4 |
| 655.4776 | 31.32358 | 31.301   | 31.34333 | 4 | 0 | 4 | 197386.3 | 616.9501 | 1379.542 |
| 212.0832 | 9.529058 | 9.5169   | 9.751083 | 4 | 1 | 3 | 12469113 | 281895.1 | 200400.5 |
| 241.2039 | 10.19342 | 9.993883 | 10.27863 | 4 | 0 | 4 | 327960.4 | 36221.26 | 18888.43 |
| 364.2852 | 31.33783 | 31.31517 | 31.38667 | 4 | 0 | 4 | 57749.84 | 41421.61 | 61523.12 |
| 490.3007 | 27.16267 | 26.87517 | 27.19583 | 6 | 0 | 5 | 165778   | 214865.8 | 36290.51 |
| 257.5525 | 31.35775 | 31.29083 | 31.61283 | 4 | 0 | 3 | 109929.4 | 3943.717 | 4650.629 |
| 802.5907 | 42.33633 | 42.28867 | 42.3545  | 5 | 3 | 2 | 24683.78 | 86169.16 | 34936.48 |
| 351.2534 | 33.811   | 33.8055  | 33.89167 | 5 | 1 | 4 | 442728.8 | 146097.8 | 113408.4 |
| 305.2117 | 30.25358 | 30.23267 | 30.296   | 4 | 0 | 4 | 112898.1 | 210954.2 | 120630.3 |
| 792.2953 | 31.32358 | 31.301   | 31.34333 | 4 | 0 | 4 | 886595.3 | 122239.2 | 151799.1 |
| 214.9173 | 2.26015  | 2.175667 | 2.349233 | 3 | 3 | 0 | 33736.02 | 786518.3 | 617064.4 |
| 607.0641 | 24.03267 | 24.03133 | 24.03283 | 3 | 0 | 3 | 32444.42 | 3885.782 | 7251.291 |
| 757.274  | 43.53283 | 43.48533 | 43.63067 | 5 | 1 | 4 | 119959.7 | 74508.64 | 51694.17 |
| 633.2523 | 29.11133 | 29.10917 | 29.15467 | 4 | 4 | 0 | 122835.9 | 366642.6 | 284419.9 |
| 337.265  | 38.8755  | 38.86367 | 38.88283 | 4 | 0 | 4 | 1176633  | 179160   | 70914.7  |
| 251.0602 | 18.1435  | 18.1395  | 18.1595  | 3 | 3 | 0 | 32357.6  | 131409.1 | 78405.18 |
| 492.1878 | 23.80017 | 23.76133 | 23.82633 | 7 | 2 | 5 | 147529.9 | 190077.8 | 280940.4 |
| 579.0977 | 37.599   | 37.59483 | 37.6065  | 3 | 0 | 3 | 96480.63 | 4588.683 | 5659.719 |
| 192.9857 | 20.78867 | 20.62817 | 20.833   | 3 | 3 | 0 | 301659.6 | 3557803  | 2559577  |
| 365.9958 | 16.95067 | 16.94917 | 17.002   | 3 | 3 | 0 | 29116.85 | 105037.8 | 63312.48 |
| 349.2015 | 25.40217 | 25.35767 | 25.43183 | 5 | 0 | 5 | 588601.1 | 100430.5 | 84092.02 |
| 689.3717 | 31.32358 | 31.31517 | 31.34333 | 4 | 0 | 4 | 214327.8 | 12066.76 | 10216.12 |
| 598.2251 | 30.95575 | 30.93717 | 30.97317 | 4 | 4 | 0 | 92816.97 | 498172.7 | 411124.1 |
| 441.2507 | 18.37283 | 18.35983 | 18.41683 | 4 | 0 | 4 | 83698.17 | 92892.37 | 38133.89 |
| 738.1753 | 29.111   | 29.08283 | 29.12433 | 3 | 3 | 0 | 37134.05 | 124777.6 | 68660.27 |
| 353.2329 | 27.28717 | 27.271   | 27.31083 | 3 | 0 | 3 | 68925.5  | 161635.4 | 22703.25 |
| 635.0176 | 31.31642 | 31.301   | 31.35767 | 4 | 0 | 4 | 119715   | 7057.563 | 10914.76 |
| 483.2292 | 38.61517 | 38.6095  | 38.62717 | 3 | 3 | 0 | 48953.45 | 218066.8 | 168986.9 |
| 225.0465 | 18.1585  | 18.124   | 18.1595  | 3 | 3 | 0 | 46819.43 | 241896   | 146970.1 |
| 249.1488 | 24.20233 | 24.16483 | 24.21    | 4 | 0 | 4 | 267550.7 | 48433.09 | 16039.78 |
| 654.4743 | 31.31642 | 31.301   | 31.34333 | 4 | 0 | 4 | 485896.4 | 0        | 0        |
| 378.1658 | 33.1575  | 33.13983 | 33.1865  | 4 | 0 | 4 | 107327.8 | 1860281  | 590043.2 |
| 1233.735 | 43.58817 | 43.573   | 43.602   | 4 | 0 | 4 | 82713.29 | 40435.43 | 67875.95 |
| 295.2273 | 31.18825 | 31.15917 | 31.19817 | 4 | 0 | 4 | 564262.4 | 1336767  | 315202.2 |
| 349.2377 | 30.893   | 30.8175  | 30.89367 | 3 | 0 | 3 | 300390.3 | 63905.28 | 40607.29 |
| 374.9706 | 11.09684 | 10.9623  | 11.12732 | 4 | 1 | 3 | 61423.39 | 154800.1 | 142822.5 |
| 578.1144 | 23.63333 | 23.58517 | 23.63467 | 3 | 0 | 3 | 121394.3 | 30932.85 | 47635.8  |
| 563.1256 | 36.999   | 36.99183 | 37.00567 | 4 | 0 | 4 | 103434.1 | 9408.087 | 3664.423 |
| 201.0466 | 20.77333 | 20.75867 | 20.77617 | 3 | 0 | 3 | 261017.5 | 780558.3 | 280768.5 |
| 468.1765 | 23.78017 | 23.76617 | 23.78217 | 3 | 0 | 3 | 101470   | 135192.4 | 71599.37 |

|          |          |          |          |    |   |   |          |          |          |
|----------|----------|----------|----------|----|---|---|----------|----------|----------|
| 1142.75  | 18.68583 | 18.67433 | 18.713   | 3  | 0 | 3 | 70007.53 | 39685.2  | 60130.43 |
| 772.5796 | 32.87917 | 32.85917 | 32.902   | 4  | 0 | 4 | 137923.3 | 300241.1 | 378257.9 |
| 807.6763 | 43.60283 | 43.60117 | 43.61717 | 5  | 4 | 1 | 165797   | 911603.8 | 658124.5 |
| 430.3894 | 37.28183 | 37.24533 | 37.51767 | 10 | 5 | 5 | 164218.6 | 1864240  | 273576.3 |
| 558.9993 | 30.41067 | 30.34733 | 30.4565  | 5  | 1 | 4 | 148260.6 | 222050.5 | 478871.4 |
| 340.2025 | 11.96353 | 11.94157 | 12.14663 | 4  | 0 | 4 | 3326933  | 112735.2 | 85156.29 |
| 599.0724 | 24.02408 | 24.00183 | 24.0475  | 4  | 0 | 4 | 114904.9 | 121190.1 | 166284.7 |
| 427.0623 | 25.68517 | 25.67417 | 25.697   | 4  | 1 | 3 | 48087.57 | 66212.76 | 124369.1 |
| 337.238  | 25.76133 | 25.72083 | 25.77333 | 5  | 0 | 5 | 636688.4 | 211378   | 95798.69 |
| 434.1707 | 37.0055  | 36.97717 | 37.00783 | 4  | 0 | 4 | 619932.3 | 680556.8 | 110055   |
| 303.1    | 21.7505  | 21.74033 | 21.77133 | 3  | 0 | 3 | 203048.9 | 975970.6 | 635183.4 |
| 406.1401 | 27.35433 | 27.333   | 27.3695  | 3  | 0 | 3 | 40624.29 | 21928.09 | 16943.26 |
| 910.2322 | 31.3185  | 31.301   | 31.32883 | 3  | 0 | 3 | 101928.7 | 4246.538 | 7264.248 |
| 384.2749 | 34.14967 | 34.12017 | 34.23067 | 4  | 0 | 4 | 480204   | 71536.83 | 39167.78 |
| 593.0228 | 33.16458 | 33.13983 | 33.1875  | 4  | 0 | 4 | 203074.2 | 1625.998 | 3635.842 |
| 184.9857 | 2.812242 | 2.628283 | 3.0323   | 4  | 0 | 3 | 624334.2 | 1010792  | 262780.6 |
| 790.1886 | 30.24258 | 30.23533 | 30.2605  | 4  | 4 | 0 | 34577.74 | 162634.7 | 136106.1 |
| 356.28   | 23.67442 | 23.66267 | 23.70833 | 4  | 0 | 4 | 102799.8 | 52200.8  | 62820.83 |
| 442.325  | 33.2355  | 33.2155  | 33.26167 | 7  | 2 | 5 | 149008.7 | 225943   | 187917.3 |
| 739.358  | 43.5875  | 43.54783 | 43.61617 | 7  | 2 | 5 | 110684   | 392060.2 | 370403.5 |
| 633.2726 | 30.24717 | 30.23533 | 30.2605  | 5  | 5 | 0 | 72826.92 | 364846.1 | 281028.2 |
| 619.4288 | 43.60267 | 43.52917 | 43.61717 | 6  | 4 | 2 | 133852.9 | 991606.5 | 656833.1 |
| 252.0586 | 18.12517 | 18.0175  | 18.1585  | 7  | 5 | 2 | 224939.9 | 972919.2 | 674923.3 |
| 1009.746 | 44.16825 | 44.14433 | 44.19833 | 10 | 5 | 5 | 830045.8 | 6244306  | 2957945  |
| 1444.973 | 43.60183 | 43.54783 | 43.61617 | 6  | 1 | 5 | 148355.4 | 68794.94 | 97044.65 |
| 288.1486 | 32.18492 | 32.12167 | 32.365   | 4  | 1 | 3 | 62892.07 | 69874.27 | 33692.26 |
| 448.2182 | 19.29075 | 19.25817 | 19.32017 | 4  | 1 | 3 | 29394.84 | 79868.74 | 49084.9  |
| 753.4411 | 40.5075  | 40.48667 | 40.52117 | 5  | 5 | 0 | 70116.25 | 469914.6 | 351037.5 |
| 437.1833 | 38.8865  | 38.86817 | 38.89767 | 4  | 0 | 4 | 119339.2 | 92713.18 | 64143.24 |
| 285.2217 | 33.17917 | 33.16933 | 33.2025  | 4  | 0 | 4 | 228862.3 | 382265.2 | 107141.3 |
| 560.1241 | 33.17183 | 33.17183 | 33.184   | 3  | 0 | 3 | 124413.5 | 44496.37 | 24181.27 |
| 371.2199 | 29.56833 | 29.52033 | 29.58383 | 5  | 0 | 5 | 490465.1 | 188493.4 | 66650.29 |
| 319.2274 | 33.09083 | 33.06617 | 33.09783 | 4  | 0 | 4 | 967980.2 | 266140.6 | 90366.17 |
| 265.0718 | 21.76967 | 21.6765  | 21.779   | 5  | 0 | 5 | 132462.4 | 30300.7  | 12698.28 |
| 740.2012 | 32.08817 | 32.07183 | 32.25117 | 5  | 4 | 1 | 93869.56 | 739063.5 | 601309.8 |
| 520.0725 | 25.60458 | 25.59033 | 25.67417 | 4  | 1 | 3 | 32836.77 | 20394.47 | 32836.8  |
| 789.2968 | 31.3185  | 31.301   | 31.34333 | 3  | 0 | 3 | 271255.7 | 768.2543 | 1717.869 |
| 323.0217 | 30.80633 | 30.7045  | 30.84933 | 5  | 1 | 4 | 130410.9 | 284010.1 | 593556.4 |
| 349.2377 | 32.50008 | 32.44333 | 32.55633 | 4  | 0 | 4 | 1107569  | 128236.2 | 53491.78 |
| 287.1567 | 22.70458 | 22.6485  | 22.73967 | 8  | 3 | 5 | 487301.5 | 232163   | 141498.1 |
| 651.3609 | 43.60167 | 43.57467 | 43.61567 | 5  | 2 | 3 | 57461.37 | 209882.7 | 135439.5 |
| 430.9183 | 22.136   | 22.015   | 22.21683 | 6  | 1 | 4 | 218240.5 | 651582.6 | 620049.4 |
| 323.2496 | 33.16458 | 33.13983 | 33.17267 | 4  | 0 | 4 | 336371.1 | 359146.2 | 250624.8 |
| 382.2314 | 20.55417 | 20.52533 | 20.64567 | 4  | 0 | 4 | 146393.4 | 143110.2 | 41939.09 |
| 568.4006 | 42.27675 | 42.2165  | 42.33383 | 10 | 5 | 5 | 64604.53 | 484168   | 111664   |
| 444.1471 | 23.46725 | 23.4595  | 23.48767 | 4  | 0 | 4 | 204445.2 | 7040.309 | 7688.945 |
| 426.2132 | 42.45383 | 42.3625  | 42.474   | 7  | 3 | 4 | 107655.3 | 1084583  | 338970.4 |

|          |          |          |          |    |   |   |          |          |          |
|----------|----------|----------|----------|----|---|---|----------|----------|----------|
| 309.2426 | 35.6055  | 35.59333 | 35.69567 | 3  | 0 | 3 | 103162   | 181598.5 | 33402.19 |
| 394.3067 | 38.89025 | 38.8755  | 38.91233 | 4  | 0 | 4 | 107297.5 | 21165.25 | 13453.12 |
| 337.0739 | 19.20767 | 19.19883 | 19.247   | 5  | 0 | 5 | 156005.7 | 51053.19 | 87138.03 |
| 541.1505 | 43.52908 | 43.499   | 43.60817 | 6  | 2 | 4 | 168047.2 | 1400807  | 1853546  |
| 337.074  | 15.44312 | 15.42228 | 15.45395 | 5  | 0 | 5 | 306839.4 | 29208.78 | 24241.12 |
| 520.9139 | 22.1215  | 22.00883 | 22.15067 | 5  | 1 | 4 | 74812.9  | 134805   | 259644.8 |
| 275.2371 | 38.80933 | 38.80933 | 38.826   | 3  | 0 | 3 | 160802.8 | 134216.6 | 94054.62 |
| 463.1419 | 29.75042 | 29.73883 | 29.78317 | 4  | 0 | 4 | 67921.27 | 42557.65 | 52793.76 |
| 712.5092 | 42.95908 | 42.91283 | 42.98033 | 10 | 5 | 5 | 421266.1 | 3811638  | 1253941  |
| 547.1446 | 43.55717 | 43.52583 | 43.64533 | 4  | 3 | 1 | 100310.9 | 622884.8 | 745913.6 |
| 579.9286 | 43.74525 | 43.7325  | 43.76567 | 10 | 5 | 5 | 2083540  | 25211852 | 5665525  |
| 312.1706 | 43.61617 | 43.6045  | 43.64667 | 3  | 0 | 3 | 45505.36 | 266091.6 | 243043.1 |
| 534.1011 | 33.1575  | 33.08083 | 33.1865  | 4  | 0 | 4 | 71529.44 | 6169.025 | 11859.02 |
| 352.2848 | 38.86075 | 38.83883 | 38.86817 | 4  | 0 | 4 | 255779.5 | 63825.88 | 77850.48 |
| 322.5833 | 33.17183 | 33.17183 | 33.17267 | 3  | 0 | 3 | 32638.37 | 694.2804 | 1552.458 |
| 486.9083 | 21.76125 | 21.5865  | 21.779   | 6  | 0 | 5 | 146153.2 | 3096.525 | 3851.234 |
| 496.1647 | 26.60517 | 26.54217 | 26.66483 | 3  | 0 | 3 | 40188.28 | 21162.63 | 19951.45 |
| 1360.953 | 43.07167 | 43.017   | 43.11483 | 9  | 4 | 5 | 177085.7 | 767084.6 | 552161.2 |
| 271.1543 | 33.20683 | 33.19867 | 33.27417 | 3  | 0 | 3 | 257931.5 | 1033260  | 357709.3 |
| 202.0821 | 27.271   | 27.17217 | 27.31783 | 5  | 2 | 3 | 62426.26 | 53669.74 | 35085.18 |
| 279.0931 | 16.64823 | 16.58927 | 16.70467 | 5  | 1 | 4 | 188840.4 | 446471.6 | 245402.1 |
| 285.2215 | 38.89017 | 38.8755  | 38.89767 | 4  | 0 | 4 | 301179.9 | 479443.8 | 74193.08 |
| 794.0794 | 8.753233 | 8.533633 | 8.7798   | 3  | 3 | 0 | 104688.4 | 108532.6 | 86532.59 |
| 409.5639 | 29.23025 | 29.155   | 29.373   | 4  | 1 | 3 | 102381.6 | 83757.87 | 182657   |
| 667.3668 | 31.26283 | 31.2445  | 31.2855  | 3  | 0 | 3 | 92105.98 | 14034.22 | 14683.31 |
| 564.1191 | 33.15733 | 33.125   | 33.1875  | 5  | 0 | 5 | 174140.8 | 14364.01 | 12058.74 |
| 415.1764 | 31.63067 | 31.612   | 31.63617 | 4  | 0 | 4 | 189744.7 | 258735   | 218155.4 |
| 665.9232 | 10.06564 | 9.93755  | 10.08655 | 4  | 1 | 3 | 243317.9 | 46444.38 | 72830.77 |
| 553.0823 | 35.5775  | 35.574   | 35.69567 | 3  | 0 | 3 | 33504.28 | 7412.771 | 5849.194 |
| 421.3295 | 30.57083 | 30.51467 | 30.59083 | 8  | 3 | 5 | 121555.3 | 227388.7 | 93855.8  |
| 377.1776 | 35.467   | 35.46467 | 35.51733 | 3  | 0 | 3 | 165626.8 | 138645.3 | 69851.44 |
| 590.2437 | 28.5445  | 28.51733 | 28.681   | 6  | 5 | 1 | 87166.03 | 375196   | 302969   |
| 674.2404 | 29.2075  | 29.16983 | 29.21517 | 4  | 4 | 0 | 101865.9 | 440995.7 | 356989.4 |
| 592.3857 | 22.8305  | 22.80367 | 22.89467 | 5  | 2 | 3 | 45518.29 | 68195.87 | 37423.32 |
| 799.5589 | 42.485   | 42.45883 | 42.5495  | 10 | 5 | 5 | 173498.7 | 1443775  | 536022.8 |
| 371.1985 | 37.0055  | 36.99183 | 37.00783 | 4  | 0 | 4 | 546366   | 273493.6 | 28238.02 |
| 441.2758 | 18.078   | 18.06983 | 18.08867 | 4  | 0 | 4 | 255483.8 | 17893.39 | 21934.98 |
| 494.1725 | 37.41983 | 37.40167 | 37.45383 | 3  | 3 | 0 | 24191.61 | 89031    | 72592.17 |
| 553.1038 | 37.014   | 36.99183 | 37.02017 | 4  | 0 | 4 | 64923.89 | 4134.499 | 4957.648 |
| 450.4308 | 42.52083 | 42.47367 | 42.6505  | 10 | 5 | 5 | 160358.6 | 868904.7 | 149638.9 |
| 187.0768 | 31.31917 | 31.301   | 31.34333 | 5  | 0 | 5 | 292014.5 | 222293.2 | 61019.43 |
| 416.2701 | 25.08583 | 25.05    | 25.0985  | 3  | 0 | 3 | 112421.6 | 152855.1 | 73046.49 |
| 435.183  | 38.87917 | 38.86817 | 38.89767 | 4  | 0 | 4 | 1336761  | 115384.7 | 43744.59 |
| 358.2436 | 38.88283 | 38.8755  | 38.88283 | 4  | 0 | 4 | 394205.6 | 291215   | 51255.29 |
| 322.2462 | 32.7385  | 32.72983 | 32.74717 | 4  | 0 | 4 | 1262832  | 1665315  | 524888.9 |
| 337.274  | 40.80075 | 40.7825  | 40.86067 | 4  | 0 | 4 | 238886.8 | 346794   | 62859.74 |
| 309.2428 | 37.43033 | 37.3955  | 37.446   | 4  | 0 | 4 | 877663.6 | 160300.1 | 26700.01 |

|          |          |          |          |   |   |   |          |          |          |
|----------|----------|----------|----------|---|---|---|----------|----------|----------|
| 527.071  | 31.336   | 31.3185  | 31.36317 | 4 | 0 | 4 | 310637.3 | 38684.53 | 68619.8  |
| 339.0898 | 17.28083 | 17.2395  | 17.3065  | 5 | 0 | 5 | 779396   | 125818.1 | 100114.9 |
| 381.2278 | 25.393   | 25.3875  | 25.433   | 3 | 0 | 3 | 472143.5 | 179928.3 | 83673.58 |
| 282.0507 | 14.23818 | 14.10212 | 14.25975 | 4 | 0 | 4 | 73447.38 | 51184.45 | 41729.03 |
| 409.999  | 21.77133 | 21.722   | 21.78433 | 5 | 0 | 5 | 1032530  | 190688.5 | 219909.8 |
| 1004.502 | 43.55983 | 43.54783 | 43.602   | 3 | 0 | 3 | 58300.49 | 103774.8 | 115754.3 |
| 437.1498 | 31.56117 | 31.55567 | 31.5705  | 3 | 0 | 3 | 32077.82 | 6821.408 | 8791.621 |
| 449.1624 | 27.23867 | 27.21433 | 27.2815  | 4 | 0 | 4 | 103120.9 | 360712   | 250797.8 |
| 373.2782 | 23.56133 | 23.56067 | 23.58883 | 3 | 0 | 3 | 41518.53 | 8725.833 | 6293.827 |
| 617.876  | 22.1655  | 22.09383 | 22.19217 | 3 | 0 | 3 | 85952.21 | 184067.2 | 341483   |
| 369.2641 | 24.96417 | 24.95417 | 24.97983 | 3 | 0 | 3 | 497845.7 | 74555.17 | 62580.33 |
| 593.8524 | 22.09383 | 22.03633 | 22.19417 | 3 | 0 | 3 | 43343.87 | 26917.07 | 47259.13 |
| 382.2496 | 21.62708 | 21.513   | 21.765   | 4 | 0 | 4 | 309244.2 | 176889   | 121554.5 |
| 420.5637 | 29.12633 | 29.10667 | 29.2115  | 5 | 1 | 4 | 66326.01 | 62126.32 | 136427.6 |
| 439.3361 | 44.63117 | 44.6035  | 44.66783 | 8 | 5 | 3 | 69264.52 | 589196.9 | 95047.31 |
| 352.2488 | 11.77789 | 11.76393 | 11.79172 | 4 | 1 | 3 | 63169.28 | 237429.8 | 141334.5 |
| 379.1783 | 35.06442 | 35.02733 | 35.09983 | 4 | 0 | 4 | 111505.7 | 229963.8 | 70289.23 |
| 392.8146 | 2.08755  | 2.062117 | 2.120333 | 3 | 3 | 0 | 39664.29 | 518981.7 | 224460.1 |
| 746.5909 | 44.97467 | 44.9735  | 44.97533 | 7 | 5 | 2 | 44488.41 | 145846.5 | 43328.89 |
| 448.3195 | 31.78383 | 31.73933 | 31.79367 | 5 | 2 | 3 | 72161.01 | 540099.6 | 171222   |
| 393.158  | 25.75517 | 25.74983 | 25.78767 | 3 | 0 | 3 | 82050.53 | 115858.1 | 34432.09 |
| 360.7036 | 37.02017 | 37.00567 | 37.02283 | 3 | 0 | 3 | 78550.23 | 0        | 0        |
| 447.7513 | 31.31483 | 31.28517 | 31.34617 | 4 | 0 | 4 | 131891.9 | 14461.22 | 20248.39 |
| 822.0737 | 42.38    | 42.34883 | 42.44883 | 9 | 4 | 5 | 91951.05 | 729790.6 | 278465.2 |
| 1405.982 | 42.96533 | 42.91283 | 42.9975  | 7 | 3 | 4 | 80018.26 | 267127   | 245948.5 |
| 261.9801 | 30.78433 | 30.474   | 30.84933 | 6 | 1 | 4 | 105781   | 179103   | 380898.1 |
| 630.2542 | 29.12433 | 29.09717 | 29.163   | 7 | 5 | 2 | 508101.5 | 2294708  | 1765807  |
| 293.2114 | 32.80367 | 32.78217 | 32.86433 | 4 | 0 | 4 | 895187.8 | 759108.7 | 665523.8 |
| 442.2795 | 18.08025 | 18.06483 | 18.08867 | 4 | 0 | 4 | 61706.14 | 8992.302 | 6791.922 |
| 366.3006 | 38.89025 | 38.86367 | 38.9125  | 4 | 0 | 4 | 105582.2 | 27884.46 | 16327.61 |
| 477.0883 | 29.52017 | 29.50583 | 29.53883 | 3 | 0 | 3 | 28914.02 | 4364.307 | 5351.437 |
| 471.375  | 9.20005  | 9.116917 | 9.243133 | 5 | 3 | 2 | 2326011  | 5272061  | 2790683  |
| 181.0865 | 10.78213 | 10.69263 | 11.0617  | 4 | 0 | 4 | 161306.1 | 296106.3 | 135473.3 |
| 309.0789 | 20.15375 | 20.1285  | 20.25267 | 4 | 0 | 4 | 165149.1 | 189839   | 125979.3 |
| 208.1051 | 24.02458 | 24.00033 | 24.03283 | 4 | 0 | 4 | 146397.3 | 12812.2  | 11645.29 |
| 393.137  | 29.49083 | 29.448   | 29.564   | 3 | 0 | 3 | 35927.01 | 8871.689 | 11370.32 |
| 414.2492 | 24.76583 | 24.757   | 24.76783 | 3 | 0 | 3 | 315465.3 | 382947.5 | 143765.6 |
| 247.6022 | 29.63192 | 29.57833 | 29.66617 | 6 | 2 | 4 | 125919.9 | 134268.6 | 258325.4 |
| 292.2852 | 28.22267 | 28.2065  | 28.235   | 3 | 3 | 0 | 723000.9 | 276788.5 | 173790.2 |
| 421.0624 | 30.45633 | 30.38217 | 30.48133 | 6 | 4 | 2 | 66127.63 | 294533.1 | 159755.9 |
| 369.1005 | 10.92227 | 10.86645 | 10.96525 | 3 | 0 | 3 | 417865.6 | 363052.6 | 601341.2 |
| 730.5692 | 35.54467 | 35.40133 | 35.56683 | 9 | 3 | 5 | 1351415  | 752034.2 | 856415.4 |
| 487.1182 | 23.03067 | 22.9965  | 23.048   | 7 | 2 | 5 | 583050.5 | 234963.4 | 354089.1 |
| 765.1759 | 29.2     | 29.19983 | 29.21517 | 3 | 3 | 0 | 32668.41 | 125585.2 | 89943.07 |
| 401.4011 | 10.39023 | 10.36242 | 10.51042 | 4 | 3 | 1 | 1899392  | 1741271  | 1482860  |
| 525.0147 | 30.81808 | 30.73283 | 30.84967 | 6 | 1 | 5 | 1784011  | 4292615  | 9231480  |
| 373.2142 | 38.8755  | 38.86367 | 38.9125  | 4 | 0 | 4 | 243943.7 | 148844.3 | 43627.44 |



|          |          |          |          |    |   |   |          |          |          |
|----------|----------|----------|----------|----|---|---|----------|----------|----------|
| 301.7054 | 38.8975  | 38.86367 | 38.89767 | 3  | 0 | 3 | 20072.64 | 0        | 0        |
| 299.7052 | 31.31517 | 31.31433 | 31.3185  | 3  | 0 | 3 | 29454.32 | 1273.864 | 2848.445 |
| 338.0978 | 29.13725 | 29.09733 | 29.24117 | 6  | 1 | 5 | 98058.32 | 155900.8 | 327693.2 |
| 431.3224 | 25.272   | 25.18283 | 25.36217 | 9  | 4 | 5 | 189330.5 | 537180.2 | 655335.7 |
| 377.8183 | 34.83392 | 34.7925  | 34.85783 | 4  | 3 | 1 | 57328.85 | 63740.04 | 38838.16 |
| 909.2279 | 31.3185  | 31.31517 | 31.35767 | 3  | 0 | 3 | 161762.8 | 4452.963 | 6172.347 |
| 351.0095 | 22.10083 | 22.08767 | 22.12267 | 3  | 3 | 0 | 34194.66 | 106559.6 | 73918.04 |
| 378.3007 | 37.00567 | 36.96133 | 37.02017 | 5  | 0 | 5 | 438225.8 | 84750.53 | 95921.21 |
| 180.0382 | 30.79183 | 30.474   | 30.87433 | 7  | 1 | 5 | 225634.6 | 329314.2 | 679697.3 |
| 485.1121 | 37.42017 | 37.40167 | 37.44067 | 5  | 4 | 1 | 68423.41 | 368612.2 | 253924.2 |
| 1274.906 | 43.32317 | 43.30783 | 43.3665  | 9  | 4 | 5 | 113437.1 | 542167.9 | 375837.2 |
| 650.9556 | 43.20217 | 43.159   | 43.24883 | 4  | 1 | 3 | 35015.63 | 168684   | 36183.8  |
| 343.2247 | 33.16333 | 33.13983 | 33.17267 | 5  | 0 | 5 | 787097.9 | 300118   | 179432.8 |
| 338.0583 | 38.88283 | 38.8755  | 38.8975  | 3  | 0 | 3 | 36859.93 | 3351.442 | 3618.979 |
| 635.2686 | 30.257   | 30.23533 | 30.29383 | 4  | 4 | 0 | 69902.52 | 271115.3 | 228429.7 |
| 846.558  | 19.7645  | 19.73783 | 19.77517 | 4  | 1 | 3 | 64291.98 | 98443.37 | 118251.4 |
| 319.9108 | 33.17183 | 33.15733 | 33.1875  | 3  | 0 | 3 | 38887.2  | 89062.5  | 173164.8 |
| 538.0233 | 30.777   | 30.73283 | 30.80633 | 3  | 0 | 3 | 105643.4 | 166387.4 | 355287.4 |
| 377.1776 | 32.34575 | 32.33217 | 32.36517 | 4  | 1 | 3 | 73531.26 | 69471.28 | 34096.98 |
| 325.1467 | 26.44417 | 26.41383 | 26.44767 | 3  | 0 | 3 | 34109.67 | 19177.74 | 7985.08  |
| 334.4792 | 38.88658 | 38.86817 | 38.89783 | 4  | 0 | 4 | 42019.56 | 678.6731 | 1517.559 |
| 335.2222 | 25.45408 | 25.40883 | 25.46683 | 4  | 1 | 3 | 469371.3 | 191731.6 | 36900.92 |
| 379.2314 | 29.163   | 29.1525  | 29.228   | 3  | 0 | 3 | 57753.64 | 155857.7 | 84064.6  |
| 365.2328 | 31.15033 | 31.13067 | 31.19817 | 3  | 0 | 3 | 189457.3 | 123858.2 | 61519.76 |
| 564.1345 | 35.05517 | 35.02733 | 35.11767 | 3  | 0 | 3 | 166749.9 | 5433.498 | 4056.803 |
| 341.2058 | 11.97147 | 11.95635 | 12.119   | 4  | 0 | 4 | 763578.8 | 169704.9 | 96910.18 |
| 479.3568 | 18.65625 | 18.62583 | 18.682   | 10 | 5 | 5 | 284929.4 | 548258.8 | 511576.3 |
| 617.2235 | 25.726   | 25.70417 | 25.75883 | 3  | 0 | 3 | 64514.48 | 6596.29  | 8910.03  |
| 953.548  | 43.649   | 43.61567 | 43.651   | 3  | 3 | 0 | 41059.89 | 140424.8 | 84749.77 |
| 800.5626 | 42.50233 | 42.45383 | 42.54683 | 7  | 3 | 4 | 75214.86 | 481154.1 | 166483.8 |
| 351.2263 | 21.273   | 21.24783 | 21.288   | 3  | 0 | 3 | 1464606  | 160296.4 | 30795.69 |
| 345.2065 | 29.77183 | 29.74017 | 29.8125  | 4  | 0 | 4 | 271615.7 | 204760.4 | 116156   |
| 323.131  | 25.50667 | 25.48867 | 25.52567 | 5  | 0 | 5 | 378605.3 | 677802.6 | 1055731  |
| 742.1889 | 32.08    | 32.05883 | 32.10167 | 4  | 4 | 0 | 97663.55 | 578291.3 | 510169.3 |
| 321.2431 | 26.64567 | 26.57117 | 26.973   | 8  | 2 | 5 | 523663.2 | 1379905  | 1671066  |
| 738.9535 | 33.16458 | 33.125   | 33.2025  | 4  | 0 | 4 | 257967.4 | 0        | 0        |
| 470.7528 | 10.69294 | 10.63273 | 10.77118 | 4  | 0 | 4 | 713476.3 | 192790.2 | 348816.5 |
| 707.5446 | 10.20803 | 10.14115 | 10.24237 | 8  | 4 | 4 | 348271.9 | 551731.9 | 600304.6 |
| 450.1444 | 24.00317 | 24.00183 | 24.03267 | 3  | 0 | 3 | 36558.89 | 1711.295 | 2358.813 |
| 632.2696 | 30.25883 | 30.23533 | 30.32083 | 7  | 5 | 2 | 309701.8 | 1442303  | 1127673  |
| 682.5052 | 37.02017 | 36.99183 | 37.02283 | 4  | 0 | 4 | 888537.8 | 59090.17 | 34265.99 |
| 385.1364 | 31.3185  | 31.29983 | 31.37767 | 5  | 0 | 5 | 187114.9 | 11287.93 | 11048.29 |
| 492.2807 | 43.61283 | 43.48033 | 43.72617 | 6  | 3 | 2 | 117003.6 | 1302942  | 541549   |
| 397.2952 | 33.219   | 33.20683 | 33.2765  | 7  | 2 | 5 | 451101.3 | 1123708  | 1019566  |
| 531.0666 | 31.3435  | 31.3185  | 31.35783 | 4  | 0 | 4 | 122013.3 | 4721.675 | 4726.578 |
| 1228.874 | 43.48525 | 43.4575  | 43.52483 | 10 | 5 | 5 | 644927.1 | 4082760  | 2418062  |
| 601.1043 | 21.88767 | 21.81517 | 21.92183 | 4  | 0 | 4 | 77600.28 | 58613.5  | 68437.26 |

|          |          |          |          |    |   |   |          |          |          |
|----------|----------|----------|----------|----|---|---|----------|----------|----------|
| 527.0144 | 30.7915  | 30.474   | 30.84967 | 6  | 1 | 4 | 193651.2 | 318845.3 | 654229.7 |
| 468.0043 | 14.22883 | 14.19772 | 14.2452  | 4  | 0 | 4 | 100996.8 | 13183.09 | 18293.65 |
| 380.2154 | 24.89608 | 24.86733 | 24.91983 | 4  | 0 | 4 | 467297.5 | 1167000  | 445439.4 |
| 527.2966 | 30.95117 | 30.94733 | 31.06583 | 6  | 5 | 1 | 428650   | 1690631  | 1439381  |
| 481.0167 | 42.91933 | 42.905   | 42.96933 | 5  | 3 | 2 | 46773.17 | 305832.6 | 89024.4  |
| 495.3578 | 42.818   | 42.77833 | 42.853   | 10 | 5 | 5 | 112275.3 | 1101967  | 133390.8 |
| 592.4613 | 43.58917 | 43.5415  | 43.60183 | 3  | 3 | 0 | 32788.05 | 141737.3 | 97664.96 |
| 287.8891 | 2.561783 | 2.410133 | 2.656033 | 5  | 2 | 3 | 3142514  | 889197.2 | 690976.9 |
| 373.1853 | 9.252367 | 9.193767 | 9.257833 | 4  | 1 | 3 | 18087742 | 34647583 | 25198821 |
| 683.5087 | 37.0215  | 36.99183 | 37.03467 | 4  | 0 | 4 | 377060.4 | 12820.33 | 6342.713 |
| 714.5378 | 42.65067 | 42.54167 | 42.67333 | 6  | 3 | 3 | 35124.54 | 156070   | 81662.13 |
| 287.8893 | 21.60467 | 21.50583 | 21.76833 | 5  | 2 | 3 | 6689400  | 76917256 | 1.04E+08 |
| 845.5547 | 19.7745  | 19.74833 | 19.86983 | 8  | 3 | 5 | 138300.3 | 309832.2 | 296035.6 |
| 731.5724 | 35.54467 | 35.4985  | 35.562   | 7  | 2 | 5 | 533842.6 | 266157   | 306716.8 |
| 398.2698 | 19.75908 | 19.74583 | 19.835   | 4  | 0 | 4 | 119750.4 | 37777.37 | 46687.27 |
| 409.066  | 29.228   | 29.2275  | 29.2755  | 3  | 0 | 3 | 59561.55 | 60742.81 | 114904.8 |
| 238.0529 | 16.62375 | 16.58317 | 16.66883 | 7  | 2 | 5 | 339340.5 | 175114.3 | 316968.3 |
| 597.2295 | 30.95725 | 30.90517 | 30.97317 | 4  | 4 | 0 | 56790.91 | 188472.6 | 158105.4 |
| 451.0256 | 21.7705  | 21.722   | 21.779   | 4  | 0 | 4 | 174418.4 | 9879.755 | 12601.66 |
| 526.1648 | 41.208   | 41.14833 | 41.25483 | 3  | 3 | 0 | 44989.96 | 97156.87 | 66678.71 |
| 943.6412 | 32.4835  | 32.43867 | 32.50617 | 7  | 3 | 4 | 97412.06 | 444606.2 | 316652.4 |
| 602.4435 | 43.60192 | 43.58667 | 43.63417 | 10 | 5 | 5 | 792401.4 | 8831983  | 1875066  |
| 426.9778 | 14.24293 | 14.22727 | 14.25975 | 4  | 0 | 4 | 199867.1 | 28046.83 | 45545.87 |
| 469.1    | 37.89583 | 37.82433 | 38.15683 | 10 | 5 | 4 | 37002.76 | 434280.1 | 121095   |
| 175.0755 | 24.01675 | 24.00183 | 24.0475  | 4  | 0 | 4 | 81524.48 | 69492.92 | 27825.13 |
| 465.0308 | 25.41017 | 25.3875  | 25.43733 | 4  | 0 | 4 | 47463    | 1966.866 | 2771.905 |
| 431.1719 | 37.00675 | 36.97717 | 37.02017 | 4  | 0 | 4 | 146491.3 | 142714.4 | 83513    |
| 529.1563 | 24.00333 | 24.00183 | 24.03283 | 3  | 0 | 3 | 45249.59 | 12619.77 | 5894.637 |
| 566.0414 | 30.82075 | 30.74683 | 30.86367 | 6  | 1 | 5 | 307830   | 537480.3 | 1189143  |
| 350.1985 | 43.60167 | 43.578   | 43.63217 | 7  | 2 | 5 | 130918.3 | 1202922  | 232328.7 |
| 515.3633 | 16.75408 | 16.69033 | 16.813   | 4  | 1 | 3 | 258375.2 | 1640793  | 1533911  |
| 272.9022 | 2.087617 | 2.032667 | 2.323083 | 5  | 1 | 4 | 104223   | 103563.4 | 231574.8 |
| 454.293  | 30.80117 | 30.78683 | 30.8205  | 4  | 4 | 0 | 162330.5 | 568900.9 | 216184.1 |
| 409.1681 | 20.59108 | 20.5545  | 20.6775  | 4  | 0 | 4 | 474631.4 | 176380.8 | 58648.78 |
| 467.1732 | 29.84142 | 29.81467 | 29.87917 | 4  | 0 | 4 | 65642.26 | 36665.18 | 12079.86 |
| 846.0557 | 10.41327 | 10.3949  | 10.49148 | 4  | 0 | 4 | 378226.1 | 199480.9 | 435983.5 |
| 581.1134 | 38.88283 | 38.8755  | 38.8975  | 3  | 0 | 3 | 293669.3 | 11086.2  | 12365.79 |
| 215.1796 | 35.62467 | 35.5775  | 35.68083 | 3  | 0 | 3 | 35433.39 | 458831.4 | 94518.28 |
| 403.9838 | 18.14433 | 18.124   | 18.1585  | 3  | 3 | 0 | 51201.65 | 300426.8 | 136800   |
| 996.7057 | 44.3555  | 44.31317 | 44.429   | 4  | 0 | 4 | 52794.79 | 71682.51 | 119959.5 |
| 1185.852 | 43.58817 | 43.57217 | 43.6235  | 10 | 5 | 5 | 595622.6 | 3764189  | 2160402  |
| 331.2273 | 33.35417 | 33.33533 | 33.3765  | 4  | 0 | 4 | 307113.1 | 169226.6 | 174478.9 |
| 360.2019 | 37.00783 | 37.00533 | 37.02017 | 3  | 0 | 3 | 226380.8 | 418388.3 | 66920.38 |
| 529.7954 | 30.94942 | 30.928   | 30.979   | 4  | 4 | 0 | 87236.37 | 207551.6 | 180138.9 |
| 925.4906 | 23.2155  | 23.20917 | 23.22367 | 3  | 0 | 3 | 52154.38 | 0        | 0        |
| 364.2848 | 37.02017 | 36.99183 | 37.03783 | 4  | 0 | 4 | 111532.6 | 180160.3 | 116471.3 |
| 592.2645 | 30.87583 | 30.84733 | 30.96167 | 3  | 3 | 0 | 45868.65 | 101437.9 | 66975.09 |

|          |          |          |          |    |   |   |          |          |          |
|----------|----------|----------|----------|----|---|---|----------|----------|----------|
| 381.1365 | 20.14317 | 20.10683 | 20.15467 | 5  | 2 | 3 | 52298.34 | 33346.75 | 39983.61 |
| 384.2749 | 24.20992 | 24.17967 | 24.22467 | 4  | 0 | 4 | 249202.3 | 127756.8 | 130392.3 |
| 377.1776 | 34.6225  | 34.62233 | 34.6745  | 3  | 0 | 3 | 117870.9 | 111298.8 | 37703.3  |
| 693.3829 | 33.14283 | 33.1275  | 33.15733 | 3  | 0 | 3 | 66685.56 | 14176.55 | 12724.67 |
| 478.3534 | 18.6675  | 18.62583 | 18.69367 | 10 | 5 | 5 | 1181596  | 2298419  | 2104983  |
| 298.0827 | 37.40483 | 37.38067 | 37.43867 | 5  | 3 | 2 | 29561.89 | 222814.2 | 116085.6 |
| 745.5878 | 44.9745  | 44.97217 | 44.97533 | 10 | 5 | 5 | 181752.4 | 778545.3 | 177646.5 |
| 265.1803 | 25.41983 | 25.40217 | 25.433   | 4  | 0 | 4 | 223610.8 | 335730.2 | 291259.6 |
| 382.1442 | 31.3185  | 31.31433 | 31.35767 | 3  | 0 | 3 | 106425.6 | 28519.69 | 12899.12 |
| 349.2378 | 23.95717 | 23.9425  | 23.959   | 4  | 0 | 4 | 687352.5 | 282318.9 | 132499.6 |
| 1318.932 | 43.19592 | 43.17383 | 43.23317 | 6  | 2 | 4 | 82675.01 | 324067.8 | 258892   |
| 593.2786 | 22.08575 | 22.005   | 22.12217 | 4  | 0 | 4 | 164575.4 | 32603.62 | 26389.26 |
| 523.1081 | 35.05783 | 35.02583 | 35.09983 | 4  | 0 | 4 | 126553.4 | 9875.168 | 4663.904 |
| 320.2308 | 25.75883 | 25.70633 | 25.77183 | 5  | 0 | 5 | 423479.5 | 400719.7 | 103672.7 |
| 586.8326 | 21.779   | 21.76967 | 21.78583 | 3  | 0 | 3 | 96521.89 | 5197.705 | 8438.522 |
| 307.0957 | 21.7705  | 21.64633 | 21.779   | 4  | 0 | 4 | 234363.7 | 70158.62 | 83613.79 |
| 470.02   | 15.8805  | 15.85927 | 15.89117 | 3  | 0 | 3 | 195870.1 | 10969.77 | 12411.77 |
| 666.4312 | 9.433342 | 9.33635  | 9.510633 | 6  | 2 | 4 | 2290246  | 898109.4 | 818506.9 |
| 393.1728 | 23.66267 | 23.6415  | 23.8565  | 5  | 1 | 4 | 131996.8 | 242801   | 280955.6 |
| 734.9426 | 31.35767 | 31.34333 | 31.37167 | 3  | 0 | 3 | 100676.1 | 7029.852 | 9564.155 |
| 581.1013 | 24.018   | 23.972   | 24.03283 | 3  | 0 | 3 | 42104.82 | 2220.978 | 2456.159 |
| 418.1891 | 33.17183 | 33.13417 | 33.1865  | 5  | 0 | 5 | 314788.9 | 473085.4 | 132077.6 |
| 310.2383 | 29.522   | 29.477   | 29.53483 | 4  | 0 | 4 | 92785.55 | 107392.7 | 95460.9  |
| 488.1217 | 23.03925 | 23.03067 | 23.048   | 4  | 0 | 4 | 100919.4 | 13380.7  | 27770.34 |
| 396.2382 | 38.471   | 38.46817 | 38.474   | 3  | 0 | 3 | 155850.4 | 1770045  | 516772.6 |
| 528.7957 | 30.94517 | 30.93717 | 30.9495  | 4  | 4 | 0 | 142033.3 | 492629.6 | 435349.2 |
| 390.0783 | 30.84633 | 30.8325  | 30.86767 | 3  | 3 | 0 | 49512.09 | 212923.7 | 124527.7 |
| 538.091  | 23.62667 | 23.60417 | 23.67883 | 3  | 0 | 3 | 38350.48 | 5472.054 | 5115.996 |
| 432.0148 | 25.696   | 25.68383 | 25.7215  | 4  | 4 | 0 | 33414.82 | 138529   | 112414.9 |
| 208.0695 | 30.80633 | 30.73283 | 30.84933 | 5  | 1 | 4 | 745341.8 | 1120795  | 2279122  |
| 540.4208 | 9.321717 | 9.22595  | 9.3496   | 5  | 3 | 2 | 2085840  | 1038360  | 880268.4 |
| 698.2407 | 29.1115  | 29.09383 | 29.1395  | 4  | 4 | 0 | 65759.34 | 178704.1 | 156678.9 |
| 201.1639 | 38.8755  | 38.86817 | 38.927   | 3  | 0 | 3 | 29087.01 | 2464.658 | 2288.286 |
| 959.6222 | 43.58967 | 43.57283 | 43.61733 | 3  | 0 | 3 | 52611.9  | 60342.36 | 84286.2  |
| 324.2615 | 35.56183 | 35.46467 | 35.666   | 3  | 0 | 3 | 244499.8 | 37078.31 | 31980.74 |
| 153.9483 | 29.42558 | 29.40817 | 29.63633 | 4  | 3 | 0 | 226711.8 | 3042145  | 2220138  |
| 330.6105 | 37.02017 | 37.00567 | 37.02283 | 3  | 0 | 3 | 25335.46 | 0        | 0        |
| 458.2498 | 35.116   | 35.09967 | 35.23533 | 3  | 0 | 3 | 100091   | 330870.1 | 70205.97 |
| 384.275  | 23.786   | 23.76533 | 23.79683 | 4  | 0 | 4 | 424006   | 51458.21 | 53319.66 |
| 452.3046 | 44.91517 | 44.8855  | 44.9735  | 7  | 4 | 3 | 26568.04 | 175624.5 | 59624.37 |
| 404.8163 | 2.065733 | 2.0466   | 2.18535  | 5  | 0 | 5 | 162553.9 | 0        | 0        |
| 371.1513 | 31.95683 | 31.95533 | 32.015   | 3  | 0 | 3 | 97181.33 | 206124.1 | 50065.37 |
| 399.4058 | 10.42227 | 10.38373 | 10.44485 | 9  | 5 | 4 | 1171839  | 2600449  | 2584705  |
| 1216.734 | 43.59317 | 43.57467 | 43.60167 | 3  | 0 | 3 | 41968.07 | 49593.11 | 65743.83 |
| 1404.979 | 42.96892 | 42.938   | 43.012   | 6  | 2 | 4 | 114982.9 | 414573.3 | 335775.8 |
| 639.0283 | 33.16458 | 33.13983 | 33.17267 | 4  | 0 | 4 | 266930.4 | 24142.43 | 18967.98 |
| 630.3078 | 30.83192 | 30.8065  | 30.93717 | 4  | 3 | 1 | 67929.29 | 348668.3 | 248505   |

|          |          |          |          |    |   |   |          |          |          |
|----------|----------|----------|----------|----|---|---|----------|----------|----------|
| 301.2165 | 38.67617 | 38.66767 | 38.67683 | 3  | 0 | 3 | 207641.4 | 375228   | 64343.17 |
| 690.496  | 43.081   | 43.05483 | 43.10017 | 10 | 5 | 5 | 567310.5 | 6374687  | 1457098  |
| 331.1737 | 30.42942 | 30.34733 | 30.51567 | 6  | 3 | 3 | 144994.1 | 207884.5 | 175353.4 |
| 390.1579 | 29.50558 | 29.46233 | 29.53883 | 4  | 0 | 4 | 27531.05 | 128505.8 | 45572.46 |
| 609.0182 | 31.34317 | 31.31433 | 31.36017 | 4  | 0 | 4 | 99088.84 | 3332.641 | 3265.298 |
| 838.5474 | 10.89825 | 10.86485 | 10.9188  | 3  | 0 | 3 | 139463.6 | 9718.352 | 17117.1  |
| 1061.513 | 31.31517 | 31.30467 | 31.34333 | 3  | 0 | 3 | 51577.68 | 0        | 0        |
| 362.1419 | 26.43183 | 26.39933 | 26.4595  | 4  | 0 | 4 | 47052.75 | 67911.9  | 72550.05 |
| 159.9691 | 2.353533 | 2.221533 | 2.413933 | 3  | 0 | 3 | 118330.9 | 0        | 0        |
| 683.0186 | 33.16325 | 33.14283 | 33.17183 | 4  | 0 | 4 | 65093.07 | 6730.514 | 2826.076 |
| 477.1873 | 34.29217 | 34.2135  | 34.46583 | 9  | 4 | 5 | 606117.5 | 6064733  | 4901760  |
| 367.221  | 14.03543 | 14.0132  | 14.10297 | 3  | 0 | 3 | 854426.8 | 831459.7 | 983719.6 |
| 443.0135 | 18.1435  | 18.1395  | 18.19    | 3  | 3 | 0 | 25773.79 | 168988.3 | 68074.2  |
| 315.1571 | 33.54042 | 33.49617 | 33.58317 | 6  | 1 | 5 | 585293.8 | 361207.2 | 60109.08 |
| 513.1677 | 10.7167  | 10.64867 | 10.77118 | 5  | 3 | 2 | 650434.4 | 1763322  | 1159394  |
| 378.209  | 44.32158 | 44.08533 | 44.3285  | 8  | 2 | 5 | 307092.8 | 1830905  | 376213.2 |
| 745.5378 | 19.16642 | 19.107   | 19.202   | 10 | 5 | 5 | 966540.8 | 2729511  | 2723533  |
| 436.1865 | 38.87917 | 38.86817 | 38.9125  | 4  | 0 | 4 | 210754.7 | 249883.3 | 83218.44 |
| 349.2377 | 34.80325 | 34.73567 | 34.85167 | 4  | 0 | 4 | 436528.5 | 141762   | 70873.73 |
| 411.9782 | 13.66793 | 13.59352 | 13.71072 | 3  | 0 | 3 | 53027.31 | 33009.21 | 44458.9  |
| 1052.769 | 44.02442 | 44.01133 | 44.0585  | 10 | 5 | 5 | 1513970  | 10701906 | 5239238  |
| 684.5115 | 37.03517 | 37.02283 | 37.04933 | 3  | 0 | 3 | 83231.17 | 15748.05 | 6355.909 |
| 459.0259 | 22.11867 | 22.08617 | 22.12267 | 3  | 3 | 0 | 37074.97 | 187455.4 | 161148.8 |
| 276.897  | 2.56735  | 2.4681   | 2.713283 | 3  | 0 | 3 | 261952.6 | 748192.5 | 233553.2 |
| 799.2863 | 31.3185  | 31.31517 | 31.34333 | 3  | 0 | 3 | 188751.3 | 765.06   | 1710.726 |
| 293.0732 | 20.74408 | 20.7015  | 20.77617 | 6  | 2 | 4 | 69000.72 | 78887    | 73274.06 |
| 528.0742 | 31.31433 | 31.30467 | 31.37217 | 3  | 0 | 3 | 67367.71 | 13616.18 | 14038.3  |
| 440.4469 | 35.147   | 35.0735  | 35.23533 | 5  | 3 | 1 | 16155809 | 20722990 | 29741710 |
| 346.6933 | 20.7515  | 20.7305  | 20.78767 | 4  | 1 | 3 | 46316.44 | 29444.11 | 33427.71 |
| 209.9646 | 3.79815  | 3.660433 | 4.112683 | 4  | 0 | 4 | 1438813  | 1311352  | 933853.5 |
| 668.9842 | 43.18117 | 43.168   | 43.21833 | 10 | 5 | 5 | 203238.6 | 2280885  | 409489.5 |
| 730.5685 | 42.51775 | 42.49767 | 42.545   | 8  | 5 | 3 | 65241.76 | 269640.5 | 154634.9 |
| 349.2108 | 28.4595  | 28.42583 | 28.48133 | 3  | 0 | 3 | 158264.8 | 119026.6 | 58696.86 |
| 668.9537 | 8.724867 | 8.479117 | 8.793333 | 3  | 3 | 0 | 53872.39 | 113372   | 96429.23 |
| 387.1937 | 23.00492 | 22.928   | 23.03917 | 10 | 5 | 5 | 1501490  | 2171131  | 1658550  |
| 599.3801 | 43.62017 | 43.60183 | 43.63033 | 3  | 3 | 0 | 35415.16 | 227363.6 | 188235   |
| 688.4638 | 37.02017 | 36.97717 | 37.02283 | 4  | 0 | 4 | 337723.4 | 98200.86 | 31133.88 |
| 908.6523 | 44.64767 | 44.60917 | 44.69967 | 3  | 0 | 3 | 35008.73 | 37333.05 | 56614.22 |
| 843.5855 | 42.2895  | 42.23283 | 42.33633 | 8  | 4 | 4 | 67809.44 | 414027.5 | 275986.2 |
| 856.5918 | 32.62625 | 32.55833 | 32.66933 | 4  | 1 | 3 | 64219.46 | 475408.6 | 427700.2 |
| 478.2952 | 29.03025 | 28.9805  | 29.06267 | 4  | 1 | 3 | 78553.13 | 366614.8 | 212998.9 |
| 1028.717 | 16.3082  | 16.26628 | 16.34058 | 3  | 0 | 3 | 82525.68 | 83368.66 | 66852.95 |
| 391.1419 | 24.853   | 24.84417 | 24.88917 | 3  | 0 | 3 | 53067.54 | 10324.44 | 11692.98 |
| 1316.926 | 43.20367 | 43.17417 | 43.21983 | 9  | 4 | 5 | 258858.8 | 1453102  | 1032747  |
| 694.3706 | 31.30467 | 31.301   | 31.34333 | 3  | 0 | 3 | 162406.7 | 94261.21 | 47727.16 |
| 399.4134 | 29.681   | 29.6215  | 29.72383 | 3  | 3 | 0 | 70507.63 | 51403.14 | 17629.19 |
| 704.1456 | 30.94733 | 30.922   | 30.97317 | 3  | 3 | 0 | 50346.63 | 172014.4 | 160220.8 |

|          |          |          |          |    |   |   |          |          |          |
|----------|----------|----------|----------|----|---|---|----------|----------|----------|
| 564.8706 | 17.45667 | 17.38367 | 17.67783 | 5  | 1 | 3 | 42099.38 | 62194.76 | 49539.39 |
| 289.8893 | 2.084592 | 2.01865  | 2.114383 | 4  | 0 | 4 | 389034.4 | 0        | 0        |
| 524.3685 | 10.70015 | 10.64782 | 10.75515 | 6  | 1 | 5 | 573734.9 | 584491   | 881988.1 |
| 811.5625 | 32.6815  | 32.6525  | 32.73083 | 10 | 5 | 5 | 558529.6 | 4189959  | 3778766  |
| 628.0705 | 23.03067 | 23.00383 | 23.048   | 3  | 0 | 3 | 98770.47 | 15041.3  | 17252.93 |
| 379.0844 | 30.84733 | 30.73283 | 30.88867 | 9  | 4 | 5 | 9730280  | 28971375 | 54386905 |
| 485.0195 | 17.28575 | 17.2395  | 17.299   | 4  | 0 | 4 | 158818.8 | 7321.762 | 12747.18 |
| 404.62   | 10.4129  | 10.37933 | 10.43838 | 8  | 4 | 4 | 649487.8 | 1106144  | 1015508  |
| 651.0277 | 37.0055  | 36.97717 | 37.02283 | 4  | 0 | 4 | 149908.8 | 8767.256 | 6109.55  |
| 808.679  | 43.61717 | 43.60283 | 43.62017 | 3  | 3 | 0 | 103980.4 | 431296.6 | 362428.3 |
| 632.2508 | 29.1255  | 29.09717 | 29.1395  | 5  | 5 | 0 | 287331.9 | 1034335  | 810169.9 |
| 379.1037 | 19.23317 | 19.17433 | 19.247   | 4  | 0 | 4 | 67210.91 | 41064.7  | 54238.51 |
| 1450.009 | 42.82033 | 42.8015  | 42.89517 | 5  | 1 | 4 | 52070.26 | 95215.71 | 93996.77 |
| 365.242  | 24.00033 | 23.9735  | 24.02883 | 3  | 0 | 3 | 373570.1 | 90018.04 | 17335.3  |
| 629.2958 | 29.21367 | 29.18517 | 29.26133 | 5  | 4 | 1 | 99210.64 | 520235.3 | 375978.1 |
| 406.3533 | 21.6805  | 21.5865  | 21.72217 | 6  | 2 | 4 | 46228.59 | 50866.75 | 63863.57 |
| 453.1762 | 33.17267 | 33.15733 | 33.1865  | 3  | 0 | 3 | 112520.1 | 108391   | 62536.33 |
| 334.1532 | 38.14517 | 38.11367 | 38.14567 | 3  | 3 | 0 | 990033.5 | 645381.5 | 715806.4 |
| 289.0889 | 15.90318 | 15.85218 | 15.9636  | 4  | 3 | 1 | 97188.06 | 498923.5 | 295206.2 |
| 705.9782 | 22.1075  | 22.04383 | 22.17967 | 5  | 1 | 4 | 74117.52 | 53377.7  | 74606.3  |
| 447.2817 | 28.1175  | 28.05933 | 28.14683 | 3  | 0 | 3 | 33703.82 | 42042.94 | 18449.05 |
| 283.0633 | 15.88023 | 15.84463 | 15.89117 | 5  | 0 | 5 | 1600283  | 1646891  | 1959064  |
| 801.5241 | 10.43678 | 10.37933 | 10.44    | 6  | 3 | 3 | 4460545  | 3923899  | 3761627  |
| 1184.848 | 43.60325 | 43.57217 | 43.6235  | 10 | 5 | 5 | 981532   | 6011426  | 3539322  |
| 695.3981 | 33.17183 | 33.13983 | 33.17267 | 4  | 0 | 4 | 1291013  | 28168.64 | 16819.37 |
| 634.2667 | 30.25217 | 30.23533 | 30.3055  | 7  | 5 | 2 | 170005.5 | 697811   | 586473.5 |
| 455.2909 | 21.30833 | 21.19517 | 21.3215  | 4  | 0 | 4 | 219209.1 | 135139.9 | 65104.13 |
| 246.9338 | 3.782567 | 3.7603   | 3.86135  | 3  | 0 | 3 | 292582.8 | 432393.1 | 305979.5 |
| 509.0785 | 21.708   | 21.54233 | 21.71283 | 3  | 0 | 3 | 64830.4  | 58866.25 | 96644.07 |
| 182.0529 | 33.52067 | 33.51067 | 33.58233 | 3  | 0 | 3 | 38349.39 | 30602.33 | 5324.574 |
| 395.1002 | 23.01883 | 22.9375  | 23.059   | 5  | 0 | 4 | 57799.5  | 8473.328 | 5857.627 |
| 530.8978 | 21.79333 | 21.64633 | 21.81517 | 3  | 0 | 3 | 40944.34 | 14793.62 | 25042.54 |
| 251.047  | 36.60933 | 36.57717 | 36.62667 | 10 | 5 | 5 | 163439.9 | 1187138  | 426858.9 |
| 338.2546 | 18.27792 | 18.20533 | 18.335   | 10 | 5 | 4 | 59099.78 | 79454.83 | 26601.93 |
| 1142.828 | 43.71783 | 43.6595  | 43.74517 | 10 | 5 | 5 | 236680.9 | 1632836  | 900549.1 |
| 1063.507 | 31.32358 | 31.301   | 31.34333 | 4  | 0 | 4 | 422098.1 | 1185.61  | 2651.106 |
| 473.0416 | 25.71258 | 25.68383 | 25.7215  | 4  | 4 | 0 | 35813.35 | 75656.15 | 63565.4  |
| 643.9093 | 10.00593 | 9.924317 | 10.03782 | 3  | 0 | 3 | 194387   | 48494.33 | 72757.17 |
| 676.2592 | 29.11875 | 29.10917 | 29.1395  | 4  | 4 | 0 | 92202.33 | 291726.2 | 258133.4 |
| 354.3006 | 40.77517 | 40.767   | 40.79633 | 3  | 0 | 3 | 100562.9 | 207687.7 | 79770.51 |
| 726.4458 | 10.36523 | 10.3514  | 10.39373 | 3  | 0 | 3 | 284110.9 | 11902.95 | 17659.11 |
| 186.9564 | 2.776217 | 2.684017 | 2.837    | 4  | 0 | 4 | 236607.7 | 561061.2 | 53608.95 |
| 535.1296 | 28.96567 | 28.916   | 29.03267 | 5  | 1 | 4 | 36586.69 | 27579.44 | 52713.55 |
| 1360.031 | 9.463983 | 9.3803   | 9.584433 | 7  | 4 | 3 | 15005332 | 8203650  | 5650770  |
| 350.2411 | 30.07367 | 30.0425  | 30.1055  | 3  | 0 | 3 | 665035.5 | 553626.7 | 279656.5 |
| 382.2593 | 35.43158 | 35.38883 | 35.48767 | 4  | 0 | 4 | 119317.8 | 24213.94 | 14241.37 |
| 350.2178 | 43.64667 | 43.50017 | 43.772   | 5  | 1 | 3 | 122486.6 | 1011401  | 350773.2 |

|          |          |          |          |    |   |   |          |          |          |
|----------|----------|----------|----------|----|---|---|----------|----------|----------|
| 404.2441 | 18.24408 | 18.2235  | 18.26283 | 4  | 0 | 4 | 41329.24 | 78590.67 | 48629.45 |
| 756.5356 | 42.71425 | 42.68533 | 42.766   | 10 | 5 | 5 | 191806.1 | 1469795  | 485575.1 |
| 505.1201 | 33.15725 | 33.13983 | 33.1875  | 4  | 0 | 4 | 207257.5 | 5084.18  | 5788.954 |
| 199.1694 | 24.24633 | 24.152   | 24.27317 | 4  | 3 | 1 | 490706.5 | 4049263  | 2510974  |
| 609.2634 | 29.20017 | 29.18433 | 29.27183 | 7  | 5 | 2 | 103786.9 | 582111.1 | 441637   |
| 767.2921 | 31.26283 | 31.2445  | 31.30033 | 3  | 0 | 3 | 63922.83 | 1887.471 | 2598.625 |
| 479.3122 | 20.84617 | 20.84117 | 20.87617 | 3  | 0 | 3 | 66343.38 | 14115.53 | 11309.54 |
| 378.0877 | 30.80633 | 30.48833 | 30.84933 | 7  | 2 | 4 | 208197   | 484441.5 | 803408.1 |
| 463.1419 | 27.3245  | 27.31783 | 27.3695  | 3  | 0 | 3 | 59831.47 | 73041.25 | 84551.65 |
| 582.1171 | 38.8975  | 38.8755  | 38.89767 | 3  | 0 | 3 | 75165.65 | 14350.98 | 26538.3  |
| 340.6191 | 20.36383 | 20.32967 | 20.43833 | 3  | 0 | 3 | 77712.78 | 6866.508 | 11288.82 |
| 625.2979 | 10.69325 | 10.6177  | 10.77118 | 3  | 0 | 3 | 446671.1 | 108439.5 | 195635.4 |
| 388.0823 | 30.83517 | 30.48633 | 30.874   | 7  | 3 | 3 | 98922.01 | 551871.7 | 373311.2 |
| 680.2328 | 20.40883 | 20.32967 | 20.51283 | 3  | 0 | 3 | 84874.38 | 18864.75 | 16893.06 |
| 703.4947 | 42.95017 | 42.92583 | 42.97367 | 10 | 5 | 5 | 95707.38 | 701407   | 289581.7 |
| 683.3098 | 29.953   | 29.951   | 29.96167 | 3  | 0 | 3 | 435466.8 | 16747.54 | 19156.47 |
| 964.7159 | 44.33025 | 44.29217 | 44.36817 | 10 | 5 | 5 | 1619445  | 12944863 | 5181723  |
| 796.3271 | 33.17183 | 33.125   | 33.1875  | 4  | 0 | 4 | 323752   | 3762.334 | 5694.262 |
| 1273.903 | 43.34417 | 43.2765  | 43.36683 | 10 | 5 | 5 | 297440.3 | 1801967  | 1269057  |
| 1317.93  | 43.20283 | 43.16967 | 43.2345  | 9  | 4 | 5 | 168791.3 | 982965.7 | 763020.8 |
| 409.1522 | 24.0145  | 23.82967 | 24.03283 | 8  | 2 | 5 | 182340.9 | 294142.4 | 336449.1 |
| 389.2555 | 18.153   | 18.13217 | 18.18483 | 4  | 0 | 4 | 73004.83 | 14277.17 | 3956.434 |
| 795.3232 | 33.17183 | 33.13983 | 33.1875  | 4  | 0 | 4 | 745226.9 | 3667.804 | 4349.94  |
| 294.6374 | 33.52067 | 33.49617 | 33.58233 | 3  | 0 | 3 | 23623.01 | 0        | 0        |
| 595.0956 | 27.22267 | 27.21433 | 27.2415  | 3  | 0 | 3 | 71594.31 | 16937.12 | 20603.34 |
| 342.0828 | 21.78433 | 21.76833 | 21.79333 | 3  | 0 | 3 | 67532.7  | 3955.675 | 7307.017 |
| 775.3203 | 31.3185  | 31.31517 | 31.34333 | 3  | 0 | 3 | 122284.9 | 2337.477 | 2160.402 |
| 362.1093 | 26.19933 | 26.16633 | 26.22483 | 4  | 1 | 3 | 46099.43 | 141872.8 | 140031.9 |
| 276.0944 | 25.69458 | 25.64683 | 25.705   | 8  | 5 | 3 | 366986.9 | 1432609  | 1265810  |
| 363.7899 | 2.11095  | 2.065733 | 2.23355  | 4  | 0 | 4 | 409539.3 | 0        | 0        |
| 821.572  | 42.37142 | 42.35    | 42.4345  | 10 | 5 | 5 | 120576.8 | 838445.8 | 366707.6 |
| 751.3867 | 43.58858 | 43.578   | 43.61733 | 6  | 1 | 5 | 109726.3 | 573125.3 | 562796.3 |
| 714.5377 | 30.8785  | 30.8175  | 30.91917 | 3  | 0 | 3 | 157078.4 | 189423.6 | 228554   |
| 472.0932 | 38.15375 | 38.1085  | 38.22217 | 6  | 1 | 5 | 79913.19 | 114744.6 | 237408.8 |
| 1039.494 | 43.59567 | 43.578   | 43.64667 | 4  | 0 | 4 | 86371.03 | 37216.88 | 68225.81 |
| 368.2803 | 36.472   | 36.47133 | 36.486   | 3  | 0 | 3 | 26706.26 | 2856.879 | 2860.83  |
| 680.4861 | 32.91833 | 32.85917 | 32.93283 | 7  | 2 | 5 | 236546.6 | 2040440  | 564960.4 |
| 690.9975 | 43.08425 | 43.034   | 43.1035  | 10 | 5 | 5 | 161845.8 | 1826433  | 423279.9 |
| 706.3646 | 43.6165  | 43.578   | 43.6195  | 6  | 1 | 5 | 146151.1 | 647532.6 | 170185.7 |
| 458.526  | 29.23517 | 29.20817 | 29.32917 | 6  | 1 | 5 | 251068   | 369747.8 | 823604.3 |
| 504.3578 | 42.69467 | 42.68533 | 42.69833 | 3  | 3 | 0 | 49832.16 | 285174.7 | 117286.9 |
| 202.9878 | 2.846317 | 2.821917 | 2.85275  | 3  | 0 | 3 | 116866.8 | 102978.1 | 93879.73 |
| 453.7299 | 2.11085  | 2.052283 | 2.194217 | 3  | 0 | 3 | 137928.6 | 0        | 0        |
| 610.2665 | 30.8195  | 30.80183 | 30.8445  | 4  | 4 | 0 | 70059.2  | 257605.4 | 215484.6 |
| 275.0989 | 20.773   | 20.716   | 20.8035  | 9  | 4 | 5 | 315349.4 | 474819.5 | 530102.4 |
| 430.6536 | 25.28183 | 25.19717 | 25.31933 | 9  | 4 | 5 | 459760.3 | 2396888  | 2187719  |
| 1230.881 | 43.48517 | 43.4575  | 43.51133 | 9  | 4 | 5 | 168274.5 | 920761.2 | 623439.1 |

|          |          |          |          |    |   |   |          |          |          |
|----------|----------|----------|----------|----|---|---|----------|----------|----------|
| 642.9506 | 30.81775 | 30.73283 | 30.84933 | 6  | 1 | 5 | 226843.2 | 410236.5 | 895744.6 |
| 396.2433 | 22.11867 | 22.08617 | 22.1355  | 6  | 4 | 2 | 189676.7 | 658496   | 497182.1 |
| 281.6049 | 28.45267 | 28.366   | 28.49317 | 3  | 0 | 3 | 33733.96 | 6394.937 | 9463.844 |
| 385.2783 | 34.16475 | 34.12017 | 34.18617 | 4  | 0 | 4 | 100275   | 37914.52 | 18106.28 |
| 484.1977 | 22.65533 | 22.636   | 22.67933 | 3  | 0 | 3 | 76090.88 | 14180.68 | 8731.624 |
| 451.1613 | 31.32358 | 31.301   | 31.34333 | 4  | 0 | 4 | 230823.3 | 127939.2 | 69674.9  |
| 531.1341 | 40.29683 | 40.27583 | 40.347   | 5  | 0 | 5 | 31025.62 | 52603.73 | 70149.79 |
| 891.4895 | 23.12017 | 23.11583 | 23.13583 | 3  | 0 | 3 | 122724.9 | 5990.141 | 9789.68  |
| 306.0987 | 21.78433 | 21.70667 | 21.79333 | 5  | 0 | 5 | 118778   | 106065.4 | 142523.1 |
| 506.8981 | 18.155   | 18.1235  | 18.1995  | 3  | 0 | 3 | 99048.46 | 272490.3 | 350438.3 |
| 675.3932 | 9.526183 | 9.47815  | 9.596683 | 8  | 5 | 3 | 8215519  | 11479763 | 9858401  |
| 558.4168 | 43.87933 | 43.84967 | 43.91483 | 10 | 5 | 5 | 597966.7 | 6628890  | 1473189  |
| 315.0854 | 29.78767 | 29.72433 | 29.83217 | 8  | 5 | 3 | 80741.2  | 650399.1 | 392226.3 |
| 687.4604 | 37.00658 | 36.97717 | 37.02017 | 4  | 0 | 4 | 785854.3 | 18339.4  | 17764.2  |
| 318.5739 | 31.30467 | 31.301   | 31.34333 | 3  | 0 | 3 | 36712.11 | 0        | 0        |
| 372.2231 | 29.56633 | 29.535   | 29.59333 | 4  | 0 | 4 | 98487.55 | 64422.59 | 38571.02 |
| 371.1984 | 37.61417 | 37.58017 | 37.62133 | 3  | 0 | 3 | 90752.15 | 327804.9 | 67003.76 |
| 416.1664 | 33.1635  | 33.15717 | 33.17183 | 4  | 0 | 4 | 121325.4 | 159096.7 | 101772.6 |
| 684.5351 | 12.71698 | 12.68423 | 12.75808 | 5  | 1 | 4 | 81235.92 | 78715.37 | 116919.9 |
| 324.1345 | 25.511   | 25.48883 | 25.52117 | 3  | 0 | 3 | 47081.02 | 68831.07 | 92083.92 |
| 601.942  | 43.60217 | 43.57217 | 43.6195  | 10 | 5 | 5 | 2205350  | 26961858 | 5934469  |
| 336.9937 | 18.1435  | 18.124   | 18.14433 | 3  | 3 | 0 | 18754.22 | 95033.64 | 70151.23 |
| 527.7976 | 30.9495  | 30.93717 | 31.07967 | 5  | 4 | 1 | 260137.6 | 875637.1 | 789313.1 |
| 412.178  | 31.61242 | 31.5775  | 31.6635  | 4  | 0 | 4 | 45750.32 | 66347.12 | 36921.29 |
| 670.5    | 12.93202 | 12.91803 | 12.94883 | 4  | 1 | 3 | 37816.32 | 24669.33 | 34655.52 |
| 747.3915 | 43.595   | 43.55817 | 43.646   | 4  | 1 | 3 | 57489.34 | 106552   | 39715.62 |
| 890.4861 | 23.12108 | 23.11583 | 23.13583 | 4  | 0 | 4 | 213879.7 | 21935.88 | 21560.79 |
| 458.3221 | 32.54    | 32.48833 | 32.57233 | 9  | 4 | 5 | 210793   | 1521003  | 1066294  |
| 307.227  | 34.91017 | 34.879   | 34.96283 | 3  | 0 | 3 | 465770.6 | 206432.6 | 33508.01 |
| 353.0817 | 29.6515  | 29.57833 | 29.66617 | 7  | 2 | 5 | 317717.6 | 497765.4 | 960272.3 |
| 350.2413 | 27.29117 | 27.25683 | 27.35483 | 4  | 0 | 4 | 112981.5 | 358968.5 | 160196.5 |
| 388.1971 | 23.006   | 22.943   | 23.048   | 9  | 4 | 5 | 226859.8 | 394383.2 | 255009.7 |
| 617.4364 | 43.60467 | 43.51367 | 43.85333 | 7  | 5 | 2 | 282362.2 | 1516490  | 958472.6 |
| 307.1109 | 22.60117 | 22.57133 | 22.62167 | 7  | 2 | 5 | 156907.2 | 243702.3 | 325839.4 |
| 383.0802 | 30.83517 | 30.74683 | 30.84933 | 7  | 2 | 5 | 362364.1 | 889482.4 | 1604240  |
| 629.8577 | 10.39362 | 10.38373 | 10.44485 | 4  | 1 | 3 | 1069519  | 332057.4 | 619589.9 |
| 993.5095 | 43.59475 | 43.55817 | 43.6045  | 4  | 0 | 4 | 68912.54 | 62854.52 | 68079.68 |
| 516.1598 | 10.69368 | 10.64867 | 10.78962 | 6  | 4 | 2 | 1236159  | 2674619  | 1818351  |
| 274.0532 | 30.80633 | 30.73283 | 30.84933 | 5  | 1 | 4 | 412401.4 | 992488.4 | 1986608  |
| 261.0832 | 20.75867 | 20.7015  | 20.78867 | 7  | 3 | 4 | 88370.94 | 114679.2 | 105709.3 |
| 347.2223 | 25.47683 | 25.43117 | 25.4815  | 3  | 0 | 3 | 561408.3 | 180015.6 | 247511.8 |
| 483.364  | 31.9825  | 31.97167 | 32.01183 | 3  | 3 | 0 | 92092.98 | 503811.2 | 307456.5 |
| 497.0197 | 30.80633 | 30.474   | 30.86367 | 7  | 1 | 5 | 278896.6 | 641438.9 | 1069151  |
| 361.7945 | 2.250933 | 2.032667 | 2.2699   | 4  | 0 | 4 | 67518.68 | 0        | 0        |
| 496.3677 | 30.97867 | 30.91283 | 31.13067 | 7  | 2 | 5 | 688093.3 | 2806037  | 2016404  |
| 246.8626 | 21.58458 | 21.57917 | 21.76833 | 4  | 1 | 3 | 1846506  | 23148059 | 33674704 |
| 224.0634 | 37.42    | 37.40483 | 37.44067 | 4  | 3 | 1 | 27377.89 | 181542.4 | 80352.03 |

|          |          |          |          |    |   |   |          |          |          |
|----------|----------|----------|----------|----|---|---|----------|----------|----------|
| 294.8839 | 2.749625 | 2.708217 | 2.837    | 4  | 0 | 4 | 167643.1 | 803400.3 | 157406.1 |
| 360.3478 | 28.23483 | 28.1905  | 28.23817 | 7  | 3 | 4 | 63561.15 | 95304.8  | 72674.05 |
| 797.3264 | 33.15767 | 33.1135  | 33.21583 | 3  | 0 | 3 | 93749.55 | 753.025  | 1683.815 |
| 542.4085 | 35.17633 | 35.14567 | 35.19067 | 3  | 0 | 3 | 79667.03 | 319490.2 | 209876   |
| 636.2642 | 30.24258 | 30.23533 | 30.2605  | 4  | 4 | 0 | 100078.2 | 418056.9 | 357704.9 |
| 248.0626 | 15.90162 | 15.85218 | 15.9636  | 4  | 3 | 1 | 132131.4 | 697522.4 | 534148.3 |
| 235.8702 | 2.207875 | 2.065733 | 2.292767 | 4  | 0 | 4 | 102496.4 | 0        | 0        |
| 411.0026 | 21.77133 | 21.76967 | 21.8075  | 3  | 0 | 3 | 97508.64 | 22976.55 | 24292.24 |
| 513.8889 | 44.17192 | 44.14433 | 44.21283 | 10 | 5 | 5 | 1038612  | 10511927 | 1909963  |
| 581.0775 | 22.5475  | 22.54667 | 22.562   | 3  | 0 | 3 | 390716.7 | 21823.36 | 22138.85 |
| 763.2105 | 32.14733 | 32.1315  | 32.22133 | 3  | 0 | 3 | 63869.29 | 12460.11 | 18987.58 |
| 577.1025 | 37.00533 | 36.9625  | 37.00567 | 3  | 0 | 3 | 72208.36 | 4567.676 | 3374.716 |
| 161.0961 | 33.17183 | 33.17183 | 33.17267 | 3  | 0 | 3 | 62335.45 | 91947.29 | 25978.29 |
| 464.3587 | 39.15875 | 39.10367 | 39.18333 | 10 | 5 | 5 | 481938.5 | 3537338  | 1033921  |
| 529.2934 | 30.94842 | 30.922   | 30.95817 | 4  | 4 | 0 | 133879.5 | 472482.2 | 389801.9 |
| 389.0753 | 30.84125 | 30.73283 | 30.90333 | 8  | 4 | 4 | 314807.8 | 2288002  | 1348655  |
| 1064.51  | 31.3185  | 31.301   | 31.34333 | 3  | 0 | 3 | 281476.9 | 0        | 0        |
| 555.2548 | 30.9425  | 30.86233 | 31.023   | 4  | 3 | 1 | 74205.86 | 186973.1 | 143588.4 |
| 333.1153 | 27.25733 | 27.20583 | 27.29617 | 4  | 0 | 4 | 41157.49 | 11410.25 | 8153.419 |
| 430.988  | 25.28633 | 25.19483 | 25.36783 | 9  | 4 | 5 | 338858.3 | 1914564  | 1686522  |
| 641.0442 | 35.042   | 35.0405  | 35.103   | 3  | 0 | 3 | 60737.79 | 1862.573 | 2840.754 |
| 609.2725 | 30.8295  | 30.8175  | 30.90517 | 3  | 3 | 0 | 84923.36 | 500619.9 | 398014   |
| 570.1135 | 33.17267 | 33.17183 | 33.1865  | 3  | 0 | 3 | 152435.8 | 12224.7  | 8071.43  |
| 651.8591 | 10.69328 | 10.67897 | 10.77118 | 4  | 1 | 3 | 614400.7 | 252990.6 | 508520.4 |
| 355.2217 | 15.18627 | 15.15077 | 15.2466  | 4  | 0 | 4 | 75374.88 | 54962.97 | 31143.97 |
| 757.3807 | 43.59142 | 43.54333 | 43.60167 | 6  | 2 | 4 | 70506.49 | 217473.9 | 154681.3 |
| 354.2183 | 15.22832 | 15.07047 | 15.34907 | 5  | 0 | 4 | 407056.4 | 203901.4 | 62445.51 |
| 291.7235 | 33.52067 | 33.49617 | 33.5675  | 3  | 0 | 3 | 23243.28 | 0        | 0        |
| 229.1953 | 35.6055  | 35.56183 | 35.6545  | 3  | 0 | 3 | 50268.8  | 33876.66 | 21003.95 |
| 675.3945 | 31.33092 | 31.287   | 31.35783 | 4  | 0 | 4 | 104386.5 | 15384.39 | 8777.862 |
| 332.9646 | 32.32733 | 32.2815  | 32.33717 | 3  | 0 | 3 | 727664.3 | 51782.15 | 71221.06 |
| 485.1663 | 24.03267 | 24.00183 | 24.03283 | 3  | 0 | 3 | 70540.3  | 39150.44 | 23504.03 |
| 383.9831 | 16.64823 | 16.60317 | 16.66883 | 5  | 1 | 4 | 218644.7 | 106216.5 | 215126   |
| 549.0874 | 32.68567 | 32.66767 | 32.70317 | 3  | 0 | 3 | 46874.48 | 6100.622 | 4101.492 |
| 651.9864 | 39.60417 | 39.54433 | 39.68433 | 3  | 0 | 3 | 88768.27 | 7003.928 | 4651.761 |
| 944.5863 | 11.28223 | 11.26468 | 11.28508 | 4  | 1 | 3 | 127670   | 28012.89 | 50235.14 |
| 489.6825 | 42.833   | 42.74767 | 42.88067 | 6  | 4 | 2 | 75191.55 | 452847.8 | 54409.55 |
| 725.006  | 42.833   | 42.79333 | 42.86617 | 10 | 5 | 5 | 65753.78 | 558794.4 | 116885   |
| 935.597  | 43.59625 | 43.51417 | 43.65983 | 6  | 1 | 5 | 68076.93 | 59229.69 | 63120.73 |
| 381.0848 | 30.84833 | 30.73283 | 31.15383 | 10 | 4 | 5 | 996600.1 | 2410850  | 4434972  |
| 319.1958 | 21.65942 | 21.54233 | 21.67933 | 4  | 1 | 3 | 90413.19 | 129882.7 | 72496.77 |
| 422.363  | 38.8755  | 38.83883 | 38.89767 | 4  | 0 | 4 | 80824.09 | 24201.68 | 19850.73 |
| 327.2242 | 21.50675 | 21.37017 | 21.54467 | 6  | 2 | 4 | 106665.9 | 159537.1 | 45017.45 |
| 417.9993 | 22.107   | 22.10083 | 22.11867 | 3  | 3 | 0 | 54263.84 | 317712.9 | 222266.3 |
| 734.5223 | 42.83025 | 42.79333 | 42.89517 | 10 | 5 | 5 | 266728   | 2385330  | 700628.4 |
| 600.4687 | 31.22958 | 31.11017 | 31.36317 | 4  | 0 | 3 | 909350.2 | 121139.9 | 116617.3 |
| 432.1967 | 31.30992 | 31.29983 | 31.34333 | 4  | 0 | 4 | 77702.69 | 92696.56 | 51835.36 |



|          |          |          |          |    |   |   |          |          |          |
|----------|----------|----------|----------|----|---|---|----------|----------|----------|
| 669.4972 | 12.94894 | 12.93428 | 13.00585 | 6  | 2 | 4 | 80411.1  | 104663.5 | 164934.3 |
| 439.9974 | 28.216   | 28.16133 | 28.37983 | 9  | 4 | 5 | 339951.8 | 916584.8 | 487794.4 |
| 373.1833 | 38.1125  | 38.09867 | 38.20067 | 7  | 5 | 2 | 156896.4 | 811599.8 | 634999.6 |
| 278.0908 | 25.69217 | 25.6535  | 25.7215  | 5  | 5 | 0 | 163644.1 | 686855.3 | 635804.3 |
| 361.2084 | 22.92433 | 22.87467 | 22.98167 | 6  | 2 | 4 | 81147.84 | 97218.97 | 101522.3 |
| 432.8897 | 32.327   | 32.31267 | 32.366   | 3  | 0 | 3 | 87411.42 | 69267.04 | 46908.65 |
| 711.3631 | 43.61617 | 43.58667 | 43.6315  | 5  | 2 | 3 | 82283.73 | 481079   | 477260.3 |
| 296.6485 | 30.98658 | 30.9495  | 31.07383 | 8  | 3 | 5 | 695906   | 1765123  | 3298119  |
| 357.1831 | 31.31433 | 31.27167 | 31.32883 | 5  | 1 | 4 | 130701.7 | 158906.8 | 32809.64 |
| 512.2764 | 11.12732 | 11.1232  | 11.218   | 3  | 0 | 3 | 4590028  | 58150.15 | 29739.78 |
| 342.9567 | 16.64823 | 16.58867 | 16.6535  | 3  | 0 | 3 | 46858.37 | 22760.51 | 41870.1  |
| 1010.749 | 44.16217 | 44.10967 | 44.19833 | 10 | 5 | 5 | 244857.7 | 1793837  | 868299.5 |
| 687.5135 | 43.1035  | 43.01317 | 43.11367 | 3  | 0 | 3 | 91171.02 | 33137.15 | 15681.29 |
| 483.0037 | 19.23183 | 19.205   | 19.247   | 3  | 0 | 3 | 97647.59 | 8516.883 | 13475.73 |
| 513.3873 | 44.16633 | 44.13983 | 44.19833 | 10 | 5 | 5 | 1593619  | 19074898 | 3528397  |
| 1186.854 | 43.61042 | 43.57217 | 43.65367 | 10 | 5 | 5 | 239753   | 1426533  | 827374.5 |
| 668.2278 | 29.11167 | 29.111   | 29.12433 | 3  | 3 | 0 | 73554.35 | 150412.5 | 141707.5 |
| 317.2478 | 38.88733 | 38.88283 | 38.9125  | 3  | 0 | 3 | 65471.61 | 203699.2 | 62961.69 |
| 1140.822 | 43.72867 | 43.69733 | 43.77583 | 10 | 5 | 5 | 1141655  | 8035682  | 4467750  |
| 325.1316 | 25.5195  | 25.47683 | 25.54033 | 4  | 0 | 4 | 49661.13 | 58068.47 | 32135.01 |
| 460.1424 | 39.342   | 39.298   | 39.372   | 3  | 0 | 3 | 23616.35 | 2889.951 | 4211.963 |
| 1141.825 | 43.73417 | 43.68183 | 43.74517 | 10 | 5 | 5 | 674610.5 | 4801614  | 2601809  |
| 273.0384 | 29.81575 | 29.74967 | 29.83217 | 4  | 3 | 1 | 29738.44 | 190451.1 | 130247.6 |
| 575.1609 | 38.66075 | 38.61933 | 38.76517 | 6  | 1 | 5 | 52620    | 31451.86 | 53041.05 |
| 403.6078 | 10.43703 | 10.37933 | 10.45412 | 9  | 4 | 5 | 3089801  | 6694975  | 8440946  |
| 960.6273 | 43.5875  | 43.55983 | 43.60167 | 3  | 0 | 3 | 52117.76 | 54842.7  | 41202.31 |
| 517.3112 | 27.47933 | 27.45517 | 27.74633 | 6  | 3 | 2 | 85327.97 | 368292.5 | 253764.5 |
| 500.1242 | 43.602   | 43.5135  | 43.64517 | 7  | 2 | 5 | 241064.2 | 2331781  | 3082643  |
| 484.3398 | 29.63717 | 29.6215  | 29.696   | 3  | 3 | 0 | 35232.64 | 278950.1 | 150228.1 |
| 560.3884 | 29.97    | 29.89017 | 29.98267 | 7  | 2 | 5 | 50415.75 | 456130.9 | 77709.21 |
| 380.0876 | 30.82783 | 30.73283 | 30.85933 | 6  | 1 | 5 | 2021548  | 4682815  | 9441271  |
| 629.9732 | 40.15783 | 39.9855  | 40.17    | 3  | 0 | 3 | 90878.41 | 4683.665 | 8525.945 |
| 656.4956 | 28.74767 | 28.74283 | 28.8485  | 5  | 1 | 4 | 125621.5 | 76315.37 | 104634.6 |
| 689.9129 | 9.490325 | 9.401867 | 9.537367 | 4  | 0 | 4 | 1023350  | 479787.7 | 626355.4 |
| 379.2314 | 28.52417 | 28.49317 | 28.59983 | 3  | 0 | 3 | 163539.1 | 130972.1 | 46889.36 |
| 298.1448 | 30.97967 | 30.93483 | 31.07383 | 7  | 2 | 5 | 172108   | 370881.1 | 535884.8 |
| 1098.802 | 43.87433 | 43.84967 | 43.9055  | 10 | 5 | 5 | 262769   | 1785877  | 949522.7 |
| 263.0989 | 20.77308 | 20.716   | 20.81767 | 10 | 5 | 5 | 1171615  | 2040128  | 2315813  |
| 779.517  | 29.79142 | 29.76983 | 29.88483 | 6  | 2 | 4 | 26532.61 | 108010.8 | 17059.76 |
| 922.6958 | 44.47667 | 44.44433 | 44.537   | 10 | 5 | 5 | 189943.2 | 1719842  | 669979.5 |
| 230.9912 | 29.80108 | 29.74583 | 29.81717 | 4  | 3 | 1 | 22755.13 | 122464.5 | 82614.11 |
| 440.9023 | 21.78583 | 21.78433 | 21.79333 | 3  | 0 | 3 | 67463.4  | 9269.485 | 12923.38 |
| 342.09   | 9.515567 | 9.49235  | 9.565117 | 7  | 4 | 3 | 2015078  | 2950031  | 2247593  |
| 552.3988 | 33.59183 | 33.579   | 33.64    | 6  | 2 | 4 | 278869.4 | 368603.1 | 302684.6 |
| 849.636  | 27.5205  | 27.446   | 27.63433 | 8  | 3 | 4 | 80259.63 | 398958   | 560670.5 |
| 291.0892 | 30.76233 | 30.74683 | 30.80633 | 3  | 0 | 3 | 72181.68 | 118359.1 | 248703.3 |
| 457.0292 | 22.11867 | 22.08617 | 22.12267 | 3  | 3 | 0 | 40599.95 | 161665.5 | 152316   |

|          |          |          |          |    |   |   |          |          |          |
|----------|----------|----------|----------|----|---|---|----------|----------|----------|
| 318.0427 | 30.79183 | 30.73283 | 30.86417 | 3  | 0 | 3 | 218088.8 | 429490.1 | 920277.2 |
| 332.1202 | 24.96125 | 24.91317 | 25.006   | 10 | 5 | 5 | 100177.6 | 511670.5 | 211328.1 |
| 345.6962 | 20.76583 | 20.7015  | 20.81833 | 8  | 3 | 5 | 122144.2 | 228887   | 281798.4 |
| 594.2385 | 28.52867 | 28.51733 | 28.58567 | 3  | 3 | 0 | 27129.63 | 93774.15 | 71055.59 |
| 899.6149 | 32.51575 | 32.4985  | 32.56617 | 8  | 3 | 5 | 184335.9 | 1149270  | 910335.7 |
| 1272.9   | 43.32267 | 43.30733 | 43.36733 | 9  | 4 | 5 | 408735.1 | 2584247  | 1705759  |
| 844.5892 | 42.30342 | 42.27217 | 42.33383 | 4  | 0 | 4 | 39924.26 | 113628.6 | 80917.53 |
| 680.2715 | 30.25383 | 30.23533 | 30.314   | 4  | 4 | 0 | 53381.34 | 206095.3 | 196270.5 |
| 432.1703 | 37.00517 | 36.97717 | 37.05283 | 4  | 0 | 4 | 81424.05 | 168016.1 | 56066.64 |
| 348.6991 | 20.76583 | 20.716   | 20.81833 | 8  | 3 | 5 | 120980.3 | 231087.5 | 279146.9 |
| 684.3132 | 29.953   | 29.93583 | 29.97683 | 3  | 0 | 3 | 189200.1 | 24300.9  | 12865.68 |
| 292.977  | 43.36717 | 43.2035  | 43.42633 | 7  | 3 | 4 | 23524.34 | 173503.5 | 50111.81 |
| 348.1962 | 20.77308 | 20.716   | 20.8035  | 10 | 5 | 5 | 18855412 | 45853699 | 51147375 |
| 659.4297 | 31.3185  | 31.301   | 31.34333 | 3  | 0 | 3 | 233264.9 | 19692.17 | 15364.63 |
| 331.1309 | 33.50617 | 33.49617 | 33.55283 | 3  | 0 | 3 | 72955.83 | 6427.665 | 6668.755 |
| 316.3214 | 27.96983 | 27.927   | 28.00933 | 10 | 5 | 5 | 2872416  | 9844492  | 5150249  |
| 280.0896 | 25.69217 | 25.6535  | 25.7215  | 5  | 5 | 0 | 132930.4 | 406133.4 | 357797.9 |
| 349.1467 | 27.19333 | 27.1805  | 27.20017 | 3  | 0 | 3 | 42738.45 | 63466.58 | 82247.58 |
| 308.0841 | 22.117   | 22.08317 | 22.12267 | 4  | 4 | 0 | 53647.39 | 130999.8 | 79937.98 |
| 506.1181 | 43.61842 | 43.5875  | 43.63067 | 6  | 2 | 4 | 104393.7 | 811071.9 | 834220.9 |
| 668.4524 | 8.724867 | 8.479117 | 8.780583 | 3  | 3 | 0 | 111460.1 | 251467.9 | 250062.9 |
| 651.485  | 39.62983 | 39.52983 | 39.69867 | 4  | 0 | 4 | 109659.4 | 18225.55 | 7328.751 |
| 637.3064 | 10.71445 | 10.6177  | 10.75237 | 4  | 0 | 4 | 326814.7 | 185212.5 | 310929.5 |
| 363.1725 | 36.6085  | 36.57717 | 36.633   | 9  | 4 | 5 | 52534.23 | 352147.5 | 144338.2 |
| 208.5712 | 30.80633 | 30.71867 | 30.835   | 5  | 1 | 4 | 150885.5 | 173966.8 | 361912   |
| 469.025  | 10.93657 | 10.85075 | 10.9508  | 3  | 0 | 3 | 117572.3 | 14424.69 | 22975.72 |
| 431.3929 | 37.27917 | 37.25233 | 37.51767 | 9  | 5 | 4 | 43455.15 | 382976.6 | 73762.16 |
| 675.3719 | 33.245   | 33.2155  | 33.24683 | 3  | 0 | 3 | 102548.4 | 24450.09 | 8594.547 |
| 458.9131 | 21.76967 | 21.75667 | 21.8075  | 3  | 0 | 3 | 64210.1  | 4848.654 | 4517.873 |
| 785.5827 | 43.2345  | 43.20367 | 43.248   | 5  | 1 | 4 | 16990.96 | 42303.95 | 19740.05 |
| 347.1927 | 20.77308 | 20.7015  | 20.8035  | 10 | 5 | 5 | 69825312 | 1.77E+08 | 1.95E+08 |
| 879.6726 | 44.61608 | 44.60317 | 44.66783 | 4  | 1 | 3 | 50764.69 | 242420.6 | 100464.3 |
| 451.4344 | 42.52617 | 42.4245  | 42.6505  | 9  | 4 | 5 | 48279.74 | 210234.5 | 58337.68 |
| 346.6111 | 30.99417 | 30.9935  | 31.07383 | 5  | 0 | 5 | 138108.4 | 256247.1 | 488116.2 |
| 297.6487 | 31.00858 | 30.97967 | 31.07383 | 6  | 2 | 4 | 132012.5 | 202528.1 | 328213.1 |
| 363.2174 | 25.72058 | 25.6755  | 25.74283 | 4  | 0 | 4 | 1140943  | 391658.8 | 293637.9 |
| 283.2059 | 37.00533 | 36.96133 | 37.02017 | 5  | 0 | 5 | 469494.9 | 1365363  | 144219.6 |
| 287.8975 | 2.076517 | 2.01865  | 2.316583 | 7  | 3 | 4 | 3304817  | 757259.5 | 433530.4 |
| 485.0213 | 22.928   | 22.92417 | 23.01033 | 3  | 3 | 0 | 64176    | 191309   | 174788.1 |
| 494.1404 | 30.96425 | 30.93717 | 31.088   | 8  | 5 | 3 | 42890.28 | 322788.2 | 166011.3 |
| 482.1545 | 37.42442 | 37.3955  | 37.47317 | 10 | 5 | 5 | 61575.7  | 465973.2 | 244309.9 |
| 262.0911 | 20.75867 | 20.7015  | 20.8035  | 8  | 3 | 5 | 247782.7 | 407805.2 | 469045.2 |
| 763.0435 | 29.6275  | 29.56383 | 29.66617 | 3  | 0 | 3 | 47776.64 | 27916.45 | 59786.23 |
| 445.6356 | 8.7119   | 8.479117 | 8.7677   | 4  | 3 | 1 | 124492.9 | 354012.2 | 295490.7 |
| 687.5398 | 38.87917 | 38.86817 | 38.89767 | 4  | 0 | 4 | 515262.8 | 95010.42 | 52028.8  |
| 686.5364 | 38.88283 | 38.8755  | 38.88283 | 4  | 0 | 4 | 1225143  | 301248.3 | 177790.9 |
| 577.3474 | 25.87667 | 25.83717 | 25.88817 | 3  | 0 | 3 | 152206.9 | 22290.58 | 7783.39  |

|          |          |          |          |    |   |   |          |          |          |
|----------|----------|----------|----------|----|---|---|----------|----------|----------|
| 319.2275 | 25.77083 | 25.70633 | 25.88233 | 6  | 1 | 5 | 2330220  | 627619.1 | 670702.5 |
| 447.1175 | 37.41567 | 37.36567 | 37.5325  | 7  | 4 | 3 | 43106.16 | 384810.4 | 168179.9 |
| 463.3031 | 33.2215  | 33.21583 | 33.22817 | 3  | 0 | 3 | 54232.14 | 213852.9 | 157114.3 |
| 479.274  | 21.273   | 21.1695  | 21.29    | 3  | 0 | 3 | 53360.98 | 21440.19 | 6561.02  |
| 582.2537 | 29.111   | 29.08117 | 29.1395  | 5  | 5 | 0 | 165719   | 758148.2 | 590634.9 |
| 470.3479 | 39.375   | 39.3505  | 39.446   | 6  | 2 | 4 | 76804.13 | 723415.6 | 375381.1 |
| 407.3166 | 9.733067 | 9.61695  | 9.76485  | 3  | 3 | 0 | 585548.9 | 442140.7 | 244408.4 |
| 707.5088 | 10.12648 | 10.06057 | 10.14968 | 8  | 4 | 4 | 880830.9 | 929735.3 | 1079201  |
| 283.2061 | 31.3185  | 31.301   | 31.36317 | 5  | 0 | 5 | 278219.3 | 627465.6 | 146875.1 |
| 380.101  | 19.22808 | 19.205   | 19.23233 | 4  | 0 | 4 | 64441.93 | 66541.57 | 100068.3 |
| 894.4967 | 31.31517 | 31.30033 | 31.33233 | 3  | 0 | 3 | 170151.8 | 25277.1  | 10380.62 |
| 384.283  | 29.85533 | 29.81883 | 29.94533 | 7  | 3 | 4 | 218862.6 | 97648.52 | 41106.64 |
| 474.1702 | 37.00567 | 36.99017 | 37.00783 | 3  | 0 | 3 | 42874.35 | 36089.01 | 13323.92 |
| 724.2199 | 10.73325 | 10.60262 | 10.75042 | 3  | 0 | 3 | 278828.4 | 83988.15 | 133960.1 |
| 523.1314 | 23.196   | 23.11933 | 23.22467 | 7  | 5 | 2 | 148961.6 | 623363.7 | 552902.6 |
| 372.202  | 37.0215  | 37.00567 | 37.2755  | 4  | 0 | 4 | 93288.87 | 185408   | 47651.54 |
| 599.107  | 33.15767 | 33.11267 | 33.17183 | 3  | 0 | 3 | 58224.46 | 35563.76 | 38692.62 |
| 742.8758 | 30.78433 | 30.47117 | 30.84967 | 6  | 1 | 4 | 243255.3 | 321784.7 | 714464.8 |
| 349.0779 | 20.773   | 20.716   | 20.8035  | 9  | 4 | 5 | 319926.8 | 560580   | 664879.1 |
| 349.1996 | 20.77308 | 20.716   | 20.8035  | 10 | 5 | 5 | 2284690  | 4806321  | 5535568  |
| 317.3248 | 27.98058 | 27.939   | 28.00933 | 10 | 5 | 5 | 550751.5 | 1564499  | 858426   |
| 379.1547 | 43.59142 | 43.57267 | 43.61567 | 8  | 3 | 5 | 180087.9 | 1281369  | 1182474  |
| 595.4569 | 9.60945  | 9.45735  | 9.662833 | 6  | 3 | 3 | 1635002  | 1185328  | 560874.3 |
| 638.1184 | 23.8115  | 23.76533 | 23.86583 | 3  | 0 | 3 | 28593.72 | 17794.68 | 35484.15 |
| 345.3228 | 20.773   | 20.716   | 20.8035  | 9  | 4 | 5 | 323287.9 | 584435   | 701670.2 |
| 420.0452 | 16.18852 | 16.18    | 16.20485 | 3  | 0 | 3 | 60616.21 | 22950.96 | 38011.12 |
| 641.0292 | 33.1645  | 33.11033 | 33.1875  | 4  | 0 | 4 | 177026   | 15390.74 | 8763.098 |
| 523.0193 | 30.74767 | 30.474   | 30.83517 | 5  | 1 | 4 | 220539.9 | 474797.6 | 998138.4 |
| 394.1085 | 29.637   | 29.593   | 29.66617 | 7  | 2 | 5 | 191687.8 | 285339.8 | 537771.2 |
| 323.1309 | 28.42408 | 28.38817 | 28.429   | 4  | 0 | 4 | 59440.1  | 132548.6 | 56272.79 |
| 513.1194 | 38.1425  | 38.13483 | 38.20767 | 5  | 1 | 4 | 52169.48 | 80351.18 | 163782.1 |
| 417.1949 | 36.99983 | 36.99017 | 37.04933 | 4  | 0 | 4 | 87765.61 | 174573.8 | 76378.23 |
| 697.3978 | 33.17183 | 33.15767 | 33.1865  | 3  | 0 | 3 | 120795.9 | 17326.16 | 7564.973 |
| 1097.799 | 43.8745  | 43.85333 | 43.91483 | 10 | 5 | 5 | 717702.8 | 5504245  | 3286716  |
| 361.1721 | 12.59151 | 12.55797 | 12.63313 | 4  | 1 | 3 | 60820.98 | 111828.8 | 167904.7 |
| 297.1866 | 10.6528  | 10.63273 | 10.73325 | 7  | 4 | 3 | 139523.3 | 224691   | 106112.3 |
| 737.2313 | 41.19333 | 41.1635  | 41.25083 | 10 | 5 | 5 | 1261193  | 2191816  | 1863130  |
| 529.0678 | 31.34333 | 31.30467 | 31.36317 | 5  | 0 | 5 | 130404.5 | 4533.933 | 4299.458 |
| 389.1626 | 37.01425 | 36.96233 | 37.065   | 4  | 0 | 4 | 58761.64 | 103707.5 | 17740.79 |
| 286.8919 | 2.089042 | 2.032667 | 2.114383 | 4  | 0 | 4 | 242055   | 0        | 0        |
| 333.9679 | 32.31267 | 32.2815  | 32.3515  | 3  | 0 | 3 | 104570.6 | 5708.965 | 5441.664 |
| 513.0877 | 21.75275 | 21.63133 | 21.77133 | 4  | 0 | 4 | 167476   | 11841.56 | 13574.61 |
| 363.217  | 23.59292 | 23.56067 | 23.60533 | 4  | 0 | 4 | 1027914  | 223911.5 | 122186   |
| 854.356  | 23.02967 | 23.01883 | 23.03067 | 3  | 0 | 3 | 82150.59 | 9126.183 | 9532.808 |
| 591.0994 | 31.37167 | 31.3185  | 31.37217 | 3  | 0 | 3 | 51432.34 | 5370.975 | 3457.615 |
| 306.892  | 2.124917 | 2.06535  | 2.302    | 3  | 0 | 3 | 56184.45 | 0        | 0        |
| 403.1803 | 37.98867 | 37.97967 | 38.00883 | 3  | 0 | 3 | 23879.47 | 144590.5 | 56903.43 |

|          |          |          |          |    |   |   |          |          |          |
|----------|----------|----------|----------|----|---|---|----------|----------|----------|
| 276.2044 | 29.522   | 29.4915  | 29.53483 | 4  | 0 | 4 | 84726.79 | 259299.8 | 96968.7  |
| 553.1185 | 38.8975  | 38.8755  | 38.89767 | 3  | 0 | 3 | 65497.38 | 5235.699 | 1495.076 |
| 412.0147 | 22.59633 | 22.57133 | 22.60683 | 7  | 2 | 5 | 194147.7 | 242018.4 | 378459.4 |
| 1009.154 | 31.33233 | 31.31433 | 31.35767 | 3  | 0 | 3 | 116231.7 | 2477.121 | 2293.69  |
| 697.3011 | 10.37652 | 10.36523 | 10.40805 | 3  | 0 | 3 | 505326.1 | 19563.9  | 37998.11 |
| 367.2483 | 29.84117 | 29.81467 | 29.88567 | 3  | 0 | 3 | 224213.7 | 168461.5 | 51017.61 |
| 293.1387 | 30.82783 | 30.74683 | 30.84967 | 4  | 1 | 3 | 94551.47 | 165617.6 | 293608.5 |
| 318.0428 | 14.64028 | 14.46898 | 14.7143  | 4  | 1 | 3 | 178183.5 | 348364.8 | 353920.1 |
| 1358.025 | 9.55075  | 9.444983 | 9.584433 | 7  | 4 | 3 | 43649380 | 28061948 | 20154254 |
| 590.8645 | 25.68758 | 25.64683 | 25.69883 | 6  | 1 | 5 | 211630.5 | 488509.2 | 1005788  |
| 415.069  | 30.4275  | 30.352   | 30.44967 | 5  | 1 | 4 | 77966.53 | 124935.4 | 222065.5 |
| 678.2747 | 30.238   | 30.23    | 30.24717 | 5  | 5 | 0 | 104875.9 | 383565.5 | 369048.7 |
| 379.0187 | 16.19252 | 16.17557 | 16.21732 | 6  | 1 | 5 | 212695.7 | 138087.5 | 234983.7 |
| 376.9992 | 22.12908 | 22.09383 | 22.1735  | 4  | 1 | 3 | 152867.5 | 246533.9 | 307556.2 |
| 171.9819 | 2.85725  | 2.837    | 3.1623   | 4  | 1 | 3 | 82415.06 | 99615.93 | 47148.02 |
| 709.9366 | 8.7523   | 8.497367 | 8.780433 | 3  | 3 | 0 | 725691.9 | 1112242  | 1159969  |
| 368.3525 | 42.5155  | 42.44383 | 42.60467 | 9  | 5 | 4 | 38721.7  | 178380.7 | 27495.71 |
| 515.3133 | 30.95017 | 30.943   | 31.03733 | 7  | 5 | 2 | 343150.5 | 1314042  | 1229995  |
| 477.8229 | 2.114383 | 2.105717 | 2.257733 | 5  | 1 | 4 | 668435.8 | 114110.8 | 255159.4 |
| 911.2285 | 31.31517 | 31.30467 | 31.34333 | 3  | 0 | 3 | 90388.06 | 662.7045 | 1481.852 |
| 699.3941 | 33.17267 | 33.15733 | 33.1865  | 3  | 0 | 3 | 56015.57 | 15273.8  | 12542.86 |
| 267.6473 | 30.97933 | 30.93717 | 31.06583 | 10 | 5 | 5 | 195840.3 | 1290952  | 558807.2 |
| 1215.734 | 43.60183 | 43.57267 | 43.6195  | 4  | 1 | 3 | 55281.34 | 86638.32 | 116031   |
| 369.2372 | 18.69983 | 18.6855  | 18.75817 | 3  | 0 | 3 | 82120.84 | 294941.4 | 59430.14 |
| 557.4137 | 43.87225 | 43.84967 | 43.9055  | 10 | 5 | 5 | 2811205  | 34829717 | 7268176  |
| 608.2698 | 30.822   | 30.80183 | 30.85917 | 5  | 5 | 0 | 118857.2 | 489293.1 | 380404.6 |
| 718.1692 | 30.94975 | 30.943   | 30.99367 | 4  | 4 | 0 | 87001.95 | 353266.2 | 365720.4 |
| 624.2942 | 10.72138 | 10.6177  | 10.75237 | 7  | 2 | 5 | 2906201  | 930060.4 | 1528428  |
| 529.0101 | 30.799   | 30.71867 | 30.84967 | 4  | 0 | 4 | 71526.34 | 97148.55 | 209080   |
| 404.2201 | 23.00492 | 22.943   | 23.048   | 10 | 5 | 5 | 927653.6 | 1236719  | 842046.4 |
| 691.4918 | 38.88283 | 38.8755  | 38.89767 | 4  | 0 | 4 | 401331.3 | 31146.91 | 11531.58 |
| 481.1565 | 37.42825 | 37.38067 | 37.46133 | 10 | 5 | 5 | 81416.35 | 655449.3 | 342870.2 |
| 341.0897 | 17.29567 | 17.2395  | 17.3065  | 5  | 0 | 5 | 93302.38 | 38705.26 | 60789.34 |
| 876.6632 | 44.61817 | 44.60317 | 44.68367 | 10 | 5 | 5 | 1454529  | 13261755 | 4349218  |
| 738.2347 | 41.20767 | 41.1635  | 41.23617 | 9  | 4 | 5 | 486136.1 | 779845.9 | 659851.6 |
| 274.0843 | 12.19882 | 11.94185 | 12.37677 | 10 | 2 | 5 | 84504.16 | 267537.6 | 134741.8 |
| 333.1528 | 23.58883 | 23.58183 | 23.616   | 3  | 0 | 3 | 46444.76 | 65299.33 | 53332.09 |
| 460.2655 | 36.4245  | 36.42317 | 36.47133 | 3  | 0 | 3 | 162264.3 | 325222.2 | 69301.32 |
| 755.5324 | 42.71775 | 42.68833 | 42.766   | 10 | 5 | 5 | 513274.6 | 4604634  | 1209248  |
| 307.1909 | 32.57767 | 32.50767 | 32.615   | 4  | 0 | 4 | 125203.6 | 159957.6 | 99325.48 |
| 628.2596 | 29.11167 | 29.10917 | 29.1395  | 5  | 4 | 1 | 202151.1 | 722990   | 485563.1 |
| 337.596  | 29.14692 | 29.1185  | 29.2115  | 6  | 1 | 5 | 368297.8 | 777273.7 | 1607703  |
| 360.5985 | 29.16633 | 29.14033 | 29.2115  | 4  | 1 | 3 | 88926.55 | 98905.59 | 212032   |
| 408.202  | 34.36767 | 34.357   | 34.4525  | 3  | 0 | 3 | 132227.6 | 1313636  | 457723.4 |
| 789.6145 | 37.431   | 37.3955  | 37.50733 | 7  | 2 | 5 | 945642.1 | 406303   | 426322   |
| 371.154  | 42.46833 | 42.45683 | 42.4845  | 3  | 3 | 0 | 23385.07 | 126387.7 | 47784.11 |
| 370.2133 | 11.2838  | 11.24202 | 11.48333 | 3  | 0 | 3 | 770166.3 | 455922.2 | 526637.7 |

|          |          |          |          |    |   |   |          |          |          |
|----------|----------|----------|----------|----|---|---|----------|----------|----------|
| 696.4014 | 33.17183 | 33.13983 | 33.17267 | 4  | 0 | 4 | 549288   | 190126.9 | 83603.58 |
| 509.0422 | 30.82075 | 30.74683 | 30.84933 | 6  | 2 | 4 | 355691.2 | 899105.9 | 1603804  |
| 378.1347 | 21.71017 | 21.5865  | 21.74217 | 8  | 3 | 5 | 101279.2 | 351431.4 | 318234   |
| 698.1908 | 30.98625 | 30.87583 | 31.088   | 8  | 3 | 5 | 303860.9 | 608123.1 | 1083818  |
| 492.2947 | 22.51875 | 22.49    | 22.55683 | 6  | 2 | 4 | 53082.29 | 256799.6 | 45957.03 |
| 349.2209 | 15.66412 | 15.61342 | 15.68465 | 6  | 3 | 3 | 355404.2 | 304900.1 | 248397.3 |
| 529.0868 | 33.17183 | 33.15433 | 33.21733 | 4  | 0 | 4 | 129960   | 6098.83  | 8032.81  |
| 381.154  | 20.75867 | 20.716   | 20.75867 | 4  | 0 | 4 | 142620.9 | 335568.5 | 275224.2 |
| 587.0925 | 37.02017 | 37.00567 | 37.03633 | 3  | 0 | 3 | 71211.72 | 4166.945 | 2624.296 |
| 334.9605 | 32.32733 | 32.2965  | 32.33717 | 3  | 0 | 3 | 119838.5 | 8166.498 | 15451.76 |
| 524.7088 | 42.60467 | 42.576   | 42.64467 | 10 | 5 | 5 | 113802.7 | 936294.1 | 118166.7 |
| 628.2934 | 29.22125 | 29.2     | 29.32917 | 10 | 5 | 5 | 320512.7 | 1944130  | 1422170  |
| 385.5638 | 31.00133 | 30.9645  | 31.088   | 6  | 1 | 5 | 138827.3 | 272055.5 | 598556.9 |
| 568.0411 | 30.79167 | 30.74683 | 30.80633 | 3  | 0 | 3 | 52982.71 | 42760.46 | 92135.42 |
| 416.2699 | 27.85058 | 27.83583 | 27.87783 | 4  | 0 | 4 | 242986.2 | 137854.5 | 25720.37 |
| 525.3805 | 23.34592 | 23.31433 | 23.44617 | 4  | 1 | 3 | 103897   | 343596.3 | 404459.4 |
| 763.298  | 31.32883 | 31.30467 | 31.32933 | 3  | 0 | 3 | 51797.04 | 720.5099 | 1611.109 |
| 964.7162 | 31.40108 | 31.37167 | 31.63033 | 4  | 1 | 3 | 129189   | 590579.2 | 733472.4 |
| 960.5988 | 9.6616   | 9.60445  | 9.69565  | 4  | 1 | 3 | 1548161  | 458891.1 | 774898.2 |
| 536.4036 | 44.01575 | 44.01133 | 44.0585  | 10 | 5 | 5 | 472495.1 | 4694013  | 950894.5 |
| 225.1123 | 24.03283 | 23.98683 | 24.0475  | 3  | 0 | 3 | 90585.66 | 234005.7 | 46240.92 |
| 564.2623 | 9.187083 | 9.101033 | 9.243133 | 3  | 3 | 0 | 971659.8 | 1865585  | 1796441  |
| 306.1044 | 12.99214 | 12.9761  | 13.05043 | 4  | 3 | 1 | 30254.32 | 91449.98 | 66548.41 |
| 372.101  | 37.40867 | 37.38983 | 37.4255  | 4  | 3 | 1 | 52152.06 | 328013   | 201137.8 |
| 289.6405 | 28.6265  | 28.56767 | 28.65783 | 4  | 1 | 3 | 61822.54 | 83589.03 | 151311.5 |
| 150.0269 | 17.1305  | 17.02267 | 17.2135  | 7  | 3 | 4 | 58180.52 | 138746.4 | 157743.8 |
| 788.6111 | 37.46183 | 37.3955  | 37.515   | 8  | 3 | 5 | 2213516  | 1014293  | 1014601  |
| 289.9752 | 30.74767 | 30.71867 | 30.80633 | 3  | 0 | 3 | 46185.27 | 63006.45 | 126593.6 |
| 701.5639 | 9.529583 | 9.365883 | 9.6817   | 3  | 3 | 0 | 9802120  | 4713830  | 5269852  |
| 366.2364 | 25.69983 | 25.66133 | 25.7115  | 4  | 0 | 4 | 428808   | 598550.1 | 101449.6 |
| 1229.877 | 43.48967 | 43.4575  | 43.51517 | 10 | 5 | 5 | 423861   | 2717870  | 1669423  |
| 737.941  | 31.34333 | 31.3185  | 31.35767 | 3  | 0 | 3 | 148513.4 | 762.03   | 1703.951 |
| 380.3161 | 38.89092 | 38.86817 | 38.9125  | 4  | 0 | 4 | 356537.4 | 77806.84 | 33751.85 |
| 451.1629 | 29.57867 | 29.50583 | 29.62233 | 3  | 0 | 3 | 78198.37 | 197601.9 | 178968.9 |
| 622.4645 | 38.08575 | 38.01717 | 38.193   | 4  | 0 | 4 | 117779.7 | 10806.47 | 9713.299 |
| 399.9366 | 10.40915 | 10.34782 | 10.43838 | 9  | 4 | 5 | 628628.1 | 1358637  | 1769047  |
| 200.0007 | 21.708   | 21.57183 | 21.7275  | 6  | 2 | 4 | 146082.5 | 715502.6 | 556263.7 |
| 499.349  | 30.96483 | 30.9495  | 31.06583 | 8  | 4 | 4 | 175125   | 1112562  | 570828.9 |
| 562.833  | 18.1235  | 18.00283 | 18.24933 | 5  | 1 | 4 | 216486.7 | 733444   | 998458.4 |
| 576.3444 | 25.88967 | 25.83717 | 25.90367 | 4  | 0 | 4 | 445832.6 | 214599.3 | 81903.35 |
| 524.0312 | 19.22808 | 19.21983 | 19.247   | 4  | 0 | 4 | 173922.4 | 28253.96 | 35178.67 |
| 299.3143 | 29.73917 | 29.73883 | 29.74017 | 3  | 0 | 3 | 106827.9 | 422481.2 | 249198.9 |
| 522.1929 | 10.68033 | 10.56983 | 10.76447 | 6  | 3 | 3 | 892166.6 | 909545.7 | 816593.5 |
| 377.0891 | 30.80633 | 30.73283 | 30.85933 | 5  | 0 | 5 | 547844.2 | 1465884  | 2901898  |
| 528.2937 | 30.94942 | 30.93567 | 30.96417 | 4  | 4 | 0 | 214418.8 | 752965   | 575703   |
| 648.4408 | 29.883   | 29.8495  | 29.907   | 7  | 4 | 3 | 38550.44 | 180794   | 40108.96 |
| 319.1178 | 25.683   | 25.63267 | 25.7215  | 7  | 5 | 2 | 250424.3 | 944601.2 | 916083.1 |

|          |          |          |          |    |   |   |          |          |          |
|----------|----------|----------|----------|----|---|---|----------|----------|----------|
| 391.1044 | 33.52517 | 33.50617 | 33.55283 | 3  | 0 | 3 | 33212.04 | 15368.06 | 21863.95 |
| 297.1471 | 30.97967 | 30.94733 | 31.07383 | 9  | 4 | 5 | 429539.5 | 1197647  | 1665136  |
| 548.8543 | 22.1365  | 22.1235  | 22.17817 | 3  | 0 | 3 | 69906.23 | 48596.74 | 97396.22 |
| 693.2041 | 22.04908 | 21.94167 | 22.079   | 4  | 0 | 4 | 99302.81 | 10693.88 | 14797.33 |
| 683.5323 | 12.72986 | 12.64    | 12.80027 | 8  | 3 | 5 | 437257.1 | 663579.8 | 1046822  |
| 205.0162 | 10.55712 | 10.27938 | 10.73325 | 4  | 1 | 3 | 988641   | 92575.27 | 135682.8 |
| 683.3098 | 31.23258 | 31.21233 | 31.24533 | 4  | 0 | 4 | 1580014  | 10137.09 | 8261.977 |
| 747.5444 | 18.65033 | 18.61117 | 18.6665  | 4  | 1 | 3 | 94980.98 | 169391   | 198710.8 |
| 444.3325 | 29.96483 | 29.951   | 29.9815  | 10 | 5 | 5 | 592170.4 | 5699224  | 1164429  |
| 700.2562 | 30.24533 | 30.23533 | 30.25317 | 3  | 3 | 0 | 53230.61 | 188902.5 | 199647   |
| 347.1093 | 31.00825 | 30.92183 | 31.088   | 6  | 1 | 5 | 173875.1 | 247342.1 | 509825.1 |
| 765.5897 | 9.52075  | 9.48745  | 9.571    | 5  | 1 | 4 | 1789763  | 755904.3 | 804134   |
| 261.0795 | 10.55548 | 10.25657 | 10.7506  | 9  | 4 | 4 | 5842353  | 835095.2 | 1309275  |
| 404.9939 | 21.708   | 21.557   | 21.7285  | 7  | 2 | 5 | 172605.7 | 201555.7 | 342239.2 |
| 417.1035 | 17.254   | 17.01433 | 17.29567 | 3  | 0 | 3 | 150827.1 | 5362.029 | 1865.475 |
| 965.7193 | 44.32567 | 44.29217 | 44.35267 | 10 | 5 | 5 | 794476.7 | 6581953  | 2349650  |
| 469.339  | 9.122908 | 8.9037   | 9.134267 | 6  | 5 | 1 | 2632593  | 9182646  | 6262358  |
| 482.0216 | 22.98608 | 22.938   | 23.01033 | 8  | 5 | 3 | 517977.1 | 1937644  | 1844681  |
| 418.2438 | 44.16567 | 44.04533 | 44.21283 | 4  | 3 | 1 | 68709.75 | 533641.7 | 144741.5 |
| 655.3125 | 30.24033 | 30.23183 | 30.32083 | 4  | 3 | 1 | 66414.73 | 233606.6 | 218770.3 |
| 379.2046 | 40.97617 | 40.93683 | 41.013   | 8  | 3 | 5 | 94343.98 | 532188.9 | 350501.5 |
| 642.307  | 16.29685 | 16.28187 | 16.32    | 3  | 0 | 3 | 44265.75 | 23548.33 | 6979.481 |
| 522.1571 | 10.68843 | 10.66397 | 10.77118 | 4  | 1 | 3 | 892166.6 | 1709399  | 1165679  |
| 626.3233 | 23.17983 | 23.167   | 23.181   | 3  | 0 | 3 | 74559.42 | 97795.67 | 74890.5  |
| 601.4404 | 43.60175 | 43.57217 | 43.6235  | 10 | 5 | 5 | 3243903  | 41668516 | 8844085  |
| 802.5276 | 10.4252  | 10.33325 | 10.45178 | 8  | 4 | 4 | 2313716  | 1601567  | 1609065  |
| 484.0187 | 22.97683 | 22.928   | 23.0335  | 7  | 5 | 2 | 252488.2 | 1080032  | 1028462  |
| 565.8572 | 18.13833 | 18.13217 | 18.16983 | 3  | 0 | 3 | 60929.3  | 78437.32 | 129239.2 |
| 337.6972 | 38.88283 | 38.8515  | 38.89767 | 3  | 0 | 3 | 19354.77 | 829.3783 | 1854.546 |
| 182.9919 | 19.01083 | 18.84883 | 19.14183 | 3  | 3 | 0 | 3800324  | 35456543 | 62261986 |
| 480.3604 | 18.63933 | 18.61083 | 18.65967 | 4  | 0 | 4 | 33097.41 | 39583.36 | 42126.17 |
| 350.0896 | 20.75867 | 20.716   | 20.78767 | 6  | 2 | 4 | 79319.97 | 109303.7 | 143120   |
| 623.2909 | 10.70767 | 10.6177  | 10.75237 | 7  | 3 | 4 | 8887913  | 3301190  | 5683438  |
| 431.842  | 10.74918 | 10.69342 | 10.8219  | 5  | 2 | 3 | 518753.1 | 533749.5 | 704444.3 |
| 641.414  | 10.88626 | 10.86975 | 10.8934  | 4  | 1 | 3 | 223073   | 315544.7 | 270837.5 |
| 369.013  | 24.97817 | 24.96417 | 24.99133 | 4  | 0 | 4 | 45392.62 | 91675.72 | 171983.5 |
| 250.0592 | 15.92938 | 15.85218 | 15.93323 | 3  | 3 | 0 | 85157.05 | 348756   | 265999.7 |
| 596.0615 | 8.753233 | 8.51555  | 8.7798   | 3  | 3 | 0 | 739725.9 | 570862   | 616985.8 |
| 901.5631 | 11.16608 | 11.09153 | 11.17027 | 3  | 0 | 3 | 83014.3  | 14903.85 | 24176.06 |
| 424.4064 | 38.09142 | 38.06833 | 38.25133 | 8  | 3 | 5 | 48623.69 | 134927.8 | 135596.8 |
| 270.1018 | 18.124   | 18.07617 | 18.17483 | 7  | 4 | 3 | 100536.3 | 593576.9 | 304959.4 |
| 346.1093 | 31.00833 | 30.9645  | 31.07383 | 6  | 1 | 5 | 539138.6 | 1134903  | 2481156  |
| 673.2503 | 32.07333 | 32.0285  | 32.10233 | 3  | 0 | 3 | 69491.64 | 27875.42 | 15324.43 |
| 478.1617 | 10.77118 | 10.68362 | 10.77882 | 3  | 0 | 3 | 224715.5 | 299471.3 | 402527.1 |
| 645.968  | 43.31567 | 43.30733 | 43.36633 | 10 | 5 | 5 | 1829500  | 24682327 | 6006729  |
| 838.3641 | 10.62083 | 10.599   | 10.69392 | 5  | 2 | 3 | 520924.8 | 457360.1 | 905884.1 |
| 710.0794 | 8.7458   | 8.497367 | 8.794383 | 4  | 4 | 0 | 530750   | 1051216  | 1133631  |

|          |          |          |          |    |   |   |          |          |          |
|----------|----------|----------|----------|----|---|---|----------|----------|----------|
| 303.2237 | 31.3305  | 31.31517 | 31.34333 | 4  | 0 | 4 | 157021.6 | 235499.7 | 162259.8 |
| 349.596  | 29.2135  | 29.19917 | 29.32917 | 7  | 2 | 5 | 1547331  | 2711141  | 5703916  |
| 515.8146 | 30.9495  | 30.93717 | 31.0515  | 5  | 4 | 1 | 173325.7 | 646057   | 635299.4 |
| 681.003  | 31.33725 | 31.25867 | 31.37217 | 4  | 0 | 4 | 108037.2 | 20629.18 | 10999.87 |
| 340.0928 | 17.28575 | 17.254   | 17.299   | 4  | 0 | 4 | 109915.6 | 91908.41 | 167644.4 |
| 616.0656 | 23.187   | 23.181   | 23.1945  | 5  | 1 | 4 | 119972.8 | 174726.6 | 339986.5 |
| 419.998  | 22.11867 | 22.07167 | 22.1385  | 3  | 3 | 0 | 42263.37 | 170649.3 | 164275.1 |
| 281.0667 | 7.43585  | 7.316867 | 7.523667 | 3  | 3 | 0 | 539707.1 | 5117765  | 4744100  |
| 422.2065 | 22.10167 | 22.08617 | 22.14467 | 4  | 4 | 0 | 161420.7 | 382230.7 | 321031.7 |
| 486.017  | 22.97108 | 22.938   | 23.01033 | 6  | 5 | 1 | 154667.1 | 589285.2 | 585885   |
| 328.2492 | 17.50883 | 17.48667 | 17.53233 | 4  | 3 | 1 | 32687.53 | 74618.68 | 55714.16 |
| 714.9878 | 23.19508 | 23.181   | 23.2015  | 4  | 1 | 3 | 52378.73 | 66080.32 | 124499.8 |
| 430.1682 | 29.47617 | 29.448   | 29.50567 | 3  | 0 | 3 | 36546.1  | 67920.16 | 25648.74 |
| 683.3097 | 28.5355  | 28.53167 | 28.55283 | 3  | 0 | 3 | 386376.2 | 9139.3   | 6239.299 |
| 375.1801 | 38.12733 | 38.1125  | 38.21533 | 7  | 5 | 2 | 87320.23 | 468317.2 | 408394.6 |
| 267.1593 | 23.75067 | 23.74617 | 23.76617 | 3  | 0 | 3 | 174222.7 | 648306.1 | 499670.8 |
| 428.9935 | 15.87031 | 15.84463 | 15.89117 | 4  | 0 | 4 | 418355   | 194425.3 | 344492.3 |
| 524.949  | 16.19243 | 16.17295 | 16.23457 | 4  | 1 | 3 | 60673.13 | 22008.06 | 42863.82 |
| 674.2274 | 30.78442 | 30.71867 | 30.84967 | 4  | 0 | 4 | 75924.4  | 64688.83 | 140451   |
| 403.2096 | 22.53183 | 22.50633 | 22.5335  | 3  | 0 | 3 | 479830.9 | 120667.5 | 85097.91 |
| 674.4016 | 9.526183 | 9.460417 | 9.596683 | 8  | 5 | 3 | 27010112 | 34528719 | 29974153 |
| 644.2267 | 29.20683 | 29.19983 | 29.21517 | 4  | 4 | 0 | 86209.84 | 357245.2 | 380547.9 |
| 386.0422 | 9.699692 | 9.65795  | 9.751083 | 6  | 3 | 3 | 230516.6 | 113752   | 127914   |
| 361.2015 | 29.1535  | 29.064   | 29.18433 | 5  | 0 | 5 | 543949.6 | 1608985  | 1455909  |
| 584.9812 | 23.84758 | 23.79717 | 23.86983 | 4  | 1 | 3 | 41919.64 | 41111.44 | 80462.91 |
| 733.5191 | 42.82975 | 42.79333 | 42.8675  | 10 | 5 | 5 | 822660.5 | 7606359  | 2733674  |
| 357.3006 | 38.66833 | 38.6095  | 38.76517 | 10 | 5 | 5 | 99605.91 | 662285.6 | 381922.4 |
| 417.2735 | 25.0985  | 25.06483 | 25.101   | 3  | 0 | 3 | 39837.16 | 18363.69 | 18830.75 |
| 475.2357 | 38.67092 | 38.63517 | 38.7505  | 8  | 3 | 5 | 160338.4 | 302997   | 235594.4 |
| 757.3469 | 29.07158 | 29.05867 | 29.12267 | 4  | 0 | 4 | 1688498  | 2675.435 | 3666.586 |
| 736.9585 | 33.184   | 33.15733 | 33.21583 | 3  | 0 | 3 | 63652.57 | 4038.14  | 7386.671 |
| 227.1951 | 9.222183 | 9.116917 | 9.294367 | 5  | 4 | 1 | 14438665 | 3488892  | 5399238  |
| 204.1386 | 11.92745 | 11.89885 | 12.0772  | 4  | 0 | 4 | 148998.2 | 120972.3 | 88734.25 |
| 224.1002 | 17.13283 | 17.02267 | 17.19717 | 10 | 5 | 5 | 564614.9 | 1750457  | 1799011  |
| 746.5415 | 18.66192 | 18.61117 | 18.691   | 6  | 3 | 3 | 348838.3 | 884761.8 | 934019.7 |
| 258.9604 | 4.054217 | 4.039533 | 4.12145  | 3  | 0 | 3 | 1736134  | 4151289  | 5004112  |
| 462.9445 | 25.67708 | 25.64683 | 25.70383 | 6  | 1 | 5 | 205759.6 | 467612.1 | 995988.5 |
| 723.2163 | 10.72897 | 10.60262 | 10.77118 | 4  | 0 | 4 | 987310.4 | 246734.8 | 485984.5 |
| 296.1469 | 30.96483 | 30.93717 | 31.07383 | 10 | 5 | 5 | 2723328  | 7337547  | 13464850 |
| 478.0289 | 22.15117 | 22.02083 | 22.26017 | 5  | 1 | 4 | 163906.7 | 200062.6 | 338763.7 |
| 710.2234 | 8.7523   | 8.51555  | 8.780433 | 3  | 3 | 0 | 546640.9 | 824338.6 | 887411.2 |
| 830.622  | 34.79267 | 34.73667 | 34.82933 | 6  | 1 | 5 | 121045.6 | 248007.5 | 319511.7 |
| 462.908  | 18.13833 | 18.03083 | 18.158   | 7  | 3 | 4 | 445077.6 | 1639453  | 2186539  |
| 511.1193 | 38.13108 | 38.1085  | 38.21533 | 6  | 1 | 5 | 314291.3 | 459526.5 | 1003578  |
| 420.1845 | 33.17958 | 33.13983 | 33.1865  | 4  | 0 | 4 | 109130.4 | 384694.5 | 118936.6 |
| 495.0407 | 24.59283 | 24.56467 | 24.646   | 4  | 1 | 3 | 36323.31 | 22129.68 | 34313.47 |
| 394.2875 | 23.376   | 23.34067 | 23.4065  | 4  | 1 | 3 | 91216.61 | 273966.1 | 282854.6 |

|          |          |          |          |    |   |   |          |          |          |
|----------|----------|----------|----------|----|---|---|----------|----------|----------|
| 531.3522 | 36.17083 | 36.16867 | 36.18533 | 3  | 3 | 0 | 20244.15 | 88981.62 | 43969.91 |
| 686.5209 | 38.61342 | 38.59433 | 38.631   | 4  | 3 | 1 | 1225143  | 1157711  | 758847.5 |
| 420.0875 | 30.80633 | 30.74683 | 30.84967 | 5  | 1 | 4 | 136597.2 | 406463.9 | 481053.8 |
| 294.081  | 20.76583 | 20.716   | 20.81833 | 8  | 3 | 5 | 353036.1 | 459280.2 | 535872.1 |
| 589.08   | 33.17183 | 33.17183 | 33.2025  | 3  | 0 | 3 | 79232.17 | 3363.861 | 2619.104 |
| 793.3282 | 33.17183 | 33.15733 | 33.1875  | 3  | 0 | 3 | 92414.92 | 860.7534 | 1924.703 |
| 355.1464 | 28.22208 | 28.21967 | 28.235   | 4  | 3 | 1 | 47909.66 | 236482.1 | 173020.5 |
| 1726.744 | 9.44975  | 9.43065  | 9.55075  | 3  | 0 | 3 | 7933632  | 2452011  | 4411350  |
| 656.2542 | 29.20017 | 29.18433 | 29.24433 | 4  | 4 | 0 | 59630.86 | 188097.6 | 189169.4 |
| 176.3732 | 17.10633 | 17.06583 | 17.14583 | 4  | 0 | 4 | 19899.21 | 21612.45 | 29948.9  |
| 509.407  | 10.41965 | 10.335   | 10.42607 | 5  | 2 | 3 | 240772.3 | 146309.7 | 143987.1 |
| 712.0076 | 42.9495  | 42.92583 | 42.984   | 10 | 5 | 5 | 979003.3 | 10059559 | 2841728  |
| 1008.743 | 44.16633 | 44.159   | 44.19833 | 10 | 5 | 5 | 1574674  | 12098035 | 6370893  |
| 643.9533 | 30.777   | 30.77517 | 30.82067 | 3  | 0 | 3 | 78644.76 | 72668.3  | 162491.3 |
| 422.7763 | 21.9755  | 21.87817 | 22.01283 | 5  | 3 | 2 | 88861.12 | 215691.5 | 299571.7 |
| 223.0639 | 37.42442 | 37.38067 | 37.48783 | 10 | 5 | 5 | 237823   | 1980150  | 915278.8 |
| 461.0243 | 22.12267 | 22.10083 | 22.1335  | 3  | 3 | 0 | 24445.43 | 110838.8 | 114270   |
| 428.1749 | 43.57217 | 43.57083 | 43.58917 | 3  | 3 | 0 | 66921.56 | 802655.4 | 242470.3 |
| 465.3621 | 39.15892 | 39.09017 | 39.18333 | 10 | 5 | 5 | 100008.5 | 744725.2 | 227967   |
| 692.4951 | 38.88283 | 38.8755  | 38.9125  | 3  | 0 | 3 | 194035.3 | 124344.9 | 54083.4  |
| 361.596  | 29.14083 | 29.11167 | 29.2115  | 7  | 2 | 5 | 600496.8 | 1337504  | 2716544  |
| 354.8021 | 35.24375 | 35.23483 | 35.25267 | 6  | 4 | 2 | 139502.4 | 110569.3 | 49443.78 |
| 397.2926 | 38.64067 | 38.62283 | 38.7505  | 7  | 4 | 3 | 87924.27 | 400792   | 346006.1 |
| 488.2696 | 44.75533 | 44.56633 | 44.97533 | 6  | 3 | 0 | 41994.14 | 525971.5 | 127438.2 |
| 866.8961 | 22.129   | 22.02933 | 22.17817 | 4  | 1 | 3 | 69416.82 | 57141.15 | 91981.61 |
| 186.9924 | 2.143425 | 2.11085  | 2.269767 | 4  | 0 | 4 | 250828.3 | 0        | 0        |
| 685.6978 | 9.546583 | 9.4881   | 9.596683 | 8  | 5 | 3 | 8240264  | 14879683 | 13953607 |
| 459.1392 | 39.37183 | 39.28383 | 39.372   | 3  | 0 | 3 | 101831.1 | 106551.5 | 66598.4  |
| 364.306  | 37.03467 | 37.01317 | 37.05017 | 5  | 2 | 3 | 44644.89 | 140603.1 | 107207.9 |
| 486.374  | 10.87166 | 10.78832 | 10.93685 | 6  | 3 | 3 | 157501.3 | 75311.53 | 81008.08 |
| 531.4922 | 29.23742 | 29.21333 | 29.32917 | 4  | 0 | 4 | 60701.79 | 73557.17 | 164478.8 |
| 398.5611 | 31.00108 | 30.9645  | 31.06583 | 6  | 1 | 5 | 102648.6 | 196628.3 | 439674.2 |
| 562.1907 | 26.12933 | 26.09583 | 26.13067 | 3  | 3 | 0 | 47466.46 | 113796.1 | 102909.5 |
| 348.2177 | 15.64867 | 15.5109  | 15.72248 | 10 | 5 | 5 | 1609029  | 2024217  | 1757732  |
| 443.2387 | 10.66402 | 10.43412 | 10.7264  | 7  | 2 | 3 | 353180.4 | 340711.2 | 340824.8 |
| 297.1151 | 22.62033 | 22.5785  | 22.66167 | 5  | 0 | 5 | 146471.1 | 278693.3 | 187390.4 |
| 527.1259 | 23.11883 | 23.11333 | 23.22467 | 4  | 4 | 0 | 65073.6  | 156833.8 | 143214.3 |
| 464.722  | 2.06535  | 2.052283 | 2.114383 | 3  | 0 | 3 | 247088.1 | 12154.71 | 7090.497 |
| 424.2344 | 13.68192 | 13.62433 | 13.71107 | 5  | 3 | 2 | 443812.3 | 192622.3 | 214009.6 |
| 661.233  | 30.799   | 30.74683 | 30.82083 | 4  | 0 | 4 | 59420.15 | 31843.8  | 59361.88 |
| 470.0929 | 38.13875 | 38.1085  | 38.20067 | 6  | 1 | 5 | 594354.4 | 871258.2 | 1839859  |
| 258.1936 | 35.59483 | 35.55833 | 35.666   | 3  | 0 | 3 | 41669.51 | 115507.2 | 47256.99 |
| 284.0667 | 15.86547 | 15.84463 | 15.89117 | 5  | 0 | 5 | 167511   | 150999.2 | 194725.2 |
| 681.0184 | 10.36968 | 10.22325 | 10.3949  | 7  | 3 | 4 | 1536976  | 1185761  | 1161255  |
| 371.1016 | 37.42108 | 37.38067 | 37.47667 | 8  | 4 | 4 | 270587.5 | 2129577  | 1329751  |
| 461.8507 | 44.5095  | 44.50417 | 44.52133 | 3  | 0 | 3 | 40821.73 | 171845.2 | 65134.9  |
| 391.074  | 30.84433 | 30.74767 | 30.90333 | 7  | 3 | 4 | 253719.5 | 1300829  | 890151.3 |



|          |          |          |          |    |   |   |          |          |          |
|----------|----------|----------|----------|----|---|---|----------|----------|----------|
| 527.1032 | 15.87585 | 15.84463 | 15.8953  | 3  | 0 | 3 | 105703.6 | 7355.854 | 9863.264 |
| 514.2921 | 10.20952 | 10.08757 | 10.24568 | 3  | 0 | 3 | 725677.8 | 89040.08 | 115475   |
| 710.3598 | 43.60117 | 43.578   | 43.61683 | 7  | 2 | 5 | 232011.3 | 1530654  | 1439118  |
| 327.2363 | 31.277   | 31.10967 | 31.31433 | 5  | 3 | 2 | 124685.3 | 274110.4 | 222420.8 |
| 342.2094 | 12.00145 | 11.9422  | 12.1328  | 3  | 0 | 3 | 51453.4  | 19920.2  | 14160.82 |
| 304.7704 | 38.88283 | 38.8755  | 38.89767 | 3  | 0 | 3 | 19876.25 | 18845.21 | 11439.06 |
| 1359.028 | 9.489492 | 9.3803   | 9.584433 | 8  | 5 | 3 | 33728276 | 22378833 | 18888779 |
| 183.0617 | 14.44424 | 14.38968 | 14.56693 | 4  | 1 | 3 | 51849.95 | 473770.7 | 199553.3 |
| 401.2538 | 21.903   | 21.7995  | 21.92183 | 3  | 0 | 3 | 252472.7 | 1295636  | 693330.6 |
| 705.1873 | 30.9495  | 30.90333 | 31.06583 | 5  | 4 | 1 | 90761.8  | 511199.2 | 291540.4 |
| 658.4898 | 34.31067 | 34.27467 | 34.385   | 10 | 5 | 5 | 320190.9 | 1386984  | 664552.4 |
| 432.2574 | 23.19575 | 23.08917 | 23.25283 | 4  | 3 | 1 | 223199.1 | 482101.6 | 303321.9 |
| 866.3588 | 10.68129 | 10.64867 | 10.77118 | 6  | 2 | 4 | 856045.2 | 641410.3 | 714177.2 |
| 435.1406 | 26.15833 | 26.05033 | 26.353   | 5  | 1 | 4 | 216917.7 | 2450491  | 1634971  |
| 1053.772 | 44.01533 | 44       | 44.0585  | 10 | 5 | 5 | 809410.6 | 5974760  | 3109337  |
| 346.0781 | 10.97798 | 10.85052 | 11.11307 | 5  | 0 | 4 | 203890.8 | 30445.22 | 28234.66 |
| 306.119  | 30.80633 | 30.73283 | 30.84933 | 5  | 1 | 4 | 692410.3 | 672149   | 1372809  |
| 878.6694 | 44.62592 | 44.6035  | 44.669   | 10 | 5 | 5 | 201283.8 | 1514655  | 575494.7 |
| 391.1782 | 28.43525 | 28.41817 | 28.45267 | 6  | 2 | 4 | 130900.7 | 192811.3 | 306196.8 |
| 325.1061 | 21.08142 | 20.89033 | 21.14683 | 6  | 4 | 2 | 119154   | 724580.6 | 410832.7 |
| 633.8214 | 31.33233 | 31.301   | 31.35767 | 3  | 0 | 3 | 85487.7  | 609.7731 | 1363.494 |
| 346.3182 | 20.75867 | 20.716   | 20.78767 | 7  | 2 | 5 | 87080.09 | 146641.1 | 103627.7 |
| 398.9421 | 10.42832 | 10.36523 | 10.45412 | 8  | 4 | 4 | 3167270  | 6935971  | 8637088  |
| 447.1604 | 28.87867 | 28.86317 | 28.929   | 6  | 1 | 4 | 73824.83 | 116325.8 | 74657.17 |
| 591.2012 | 25.49633 | 25.43117 | 25.52117 | 5  | 1 | 4 | 43052.45 | 30830.8  | 36133.29 |
| 498.9166 | 30.95867 | 30.943   | 31.07383 | 10 | 5 | 5 | 70819.66 | 590889.1 | 247784.2 |
| 390.1368 | 24.594   | 24.5315  | 24.6095  | 7  | 2 | 5 | 108816   | 204150.2 | 335694.6 |
| 499.176  | 29.6515  | 29.57833 | 29.6815  | 9  | 4 | 5 | 2589408  | 5574978  | 10348861 |
| 681.3563 | 8.753233 | 8.51555  | 8.76595  | 3  | 3 | 0 | 687814.4 | 553908.1 | 601159.5 |
| 682.5283 | 12.71693 | 12.65432 | 12.78712 | 8  | 3 | 5 | 1127175  | 1967720  | 2675005  |
| 301.056  | 21.76967 | 21.75283 | 21.79333 | 3  | 0 | 3 | 108262.2 | 57113.91 | 48343.56 |
| 455.1377 | 24.018   | 24.00183 | 24.03283 | 3  | 0 | 3 | 91520.63 | 182041.4 | 389551.6 |
| 646.1101 | 29.62975 | 29.57833 | 29.66617 | 4  | 1 | 3 | 100124.3 | 105466.3 | 214338.6 |
| 266.0841 | 22.60933 | 22.57133 | 22.631   | 7  | 2 | 5 | 266478.3 | 342336.9 | 423147.4 |
| 645.4663 | 43.32267 | 43.30733 | 43.36633 | 10 | 5 | 5 | 2685988  | 36330921 | 8310098  |
| 651.4711 | 10.88625 | 10.81963 | 10.95503 | 8  | 3 | 5 | 162406.1 | 135679   | 174685.4 |
| 753.4739 | 10.26495 | 10.24568 | 10.30798 | 3  | 0 | 3 | 85304.84 | 35092.22 | 45194.71 |
| 287.6337 | 29.12592 | 29.09717 | 29.24117 | 8  | 3 | 5 | 1296262  | 3672693  | 6162153  |
| 334.2461 | 36.4085  | 36.407   | 36.47133 | 3  | 0 | 3 | 1001137  | 3678857  | 998365.7 |
| 430.3036 | 41.71667 | 41.67167 | 41.774   | 9  | 5 | 4 | 35677.31 | 340407   | 43946.03 |
| 163.6439 | 9.562183 | 9.500283 | 9.577667 | 4  | 3 | 1 | 529457.8 | 796383.5 | 434949.2 |
| 1213.734 | 43.56058 | 43.5435  | 43.58967 | 4  | 0 | 4 | 77251.22 | 74476.21 | 103375.3 |
| 524.3744 | 42.60617 | 42.58533 | 42.66483 | 10 | 5 | 5 | 149241.1 | 1153188  | 199773.4 |
| 554.257  | 30.96417 | 30.93717 | 31.06583 | 7  | 4 | 3 | 104131.2 | 375670.3 | 196415   |
| 375.1317 | 32.43958 | 32.37967 | 32.4985  | 4  | 1 | 3 | 71730.68 | 70079.61 | 102043.9 |
| 550.351  | 33.70683 | 33.68233 | 33.811   | 6  | 3 | 3 | 68178.05 | 414875.2 | 228394.8 |
| 645.1069 | 29.64233 | 29.57833 | 29.66683 | 7  | 2 | 5 | 385549   | 650121   | 1354134  |

|          |          |          |          |    |   |   |          |          |          |
|----------|----------|----------|----------|----|---|---|----------|----------|----------|
| 373.1723 | 31.35783 | 31.30033 | 31.38783 | 3  | 0 | 3 | 227593.9 | 24064.37 | 7039.21  |
| 716.5172 | 27.005   | 26.9415  | 27.0465  | 6  | 2 | 4 | 51627.54 | 195736.1 | 245331.4 |
| 537.3021 | 9.243133 | 9.101033 | 9.460417 | 7  | 5 | 1 | 6790317  | 19457878 | 11267983 |
| 264.1022 | 20.77308 | 20.716   | 20.8035  | 8  | 3 | 5 | 154619.5 | 255155.7 | 293650.6 |
| 483.0038 | 15.41258 | 15.40755 | 15.46852 | 3  | 0 | 3 | 56007.36 | 8653.921 | 9030.44  |
| 1143.831 | 43.73267 | 43.70317 | 43.76917 | 7  | 2 | 5 | 73583.34 | 338618   | 208290.5 |
| 285.8936 | 2.152425 | 2.032667 | 2.1715   | 4  | 0 | 4 | 427921.8 | 0        | 0        |
| 961.6025 | 9.63195  | 9.591083 | 9.69125  | 3  | 0 | 3 | 510513.8 | 149706.9 | 212038.8 |
| 294.2147 | 32.79633 | 32.76633 | 32.86433 | 4  | 0 | 4 | 151919.8 | 268751.4 | 111851.6 |
| 607.4582 | 38.37433 | 38.2305  | 38.54817 | 5  | 2 | 3 | 155911.3 | 1007733  | 1107426  |
| 746.5413 | 19.15817 | 19.13767 | 19.2175  | 8  | 3 | 5 | 454209.9 | 1150679  | 1162400  |
| 684.3135 | 31.24492 | 31.21233 | 31.24883 | 4  | 0 | 4 | 640169.7 | 25886.21 | 18717.81 |
| 705.4885 | 43.0845  | 43.017   | 43.13017 | 5  | 1 | 4 | 68788.8  | 204589.7 | 222898.9 |
| 420.2097 | 22.1015  | 22.005   | 22.12267 | 5  | 4 | 1 | 244481.5 | 721472.2 | 603383.5 |
| 640.0317 | 33.17958 | 33.11033 | 33.1865  | 4  | 0 | 4 | 85795.26 | 91900.87 | 123142.2 |
| 385.2784 | 27.333   | 27.29967 | 27.42817 | 3  | 0 | 3 | 73835.19 | 45370.9  | 31198.03 |
| 758.3502 | 29.07875 | 29.05867 | 29.10767 | 4  | 0 | 4 | 744888.3 | 78937.65 | 38898.78 |
| 366.2182 | 14.03543 | 14.0132  | 14.04275 | 3  | 0 | 3 | 3282855  | 110955   | 52602.94 |
| 368.9725 | 21.78433 | 21.70667 | 21.79333 | 5  | 0 | 5 | 161631   | 199480.8 | 242674.7 |
| 249.11   | 14.23448 | 14.08735 | 14.2452  | 3  | 0 | 3 | 151786.7 | 74941.19 | 60141.47 |
| 464.1302 | 37.42333 | 37.3955  | 37.6275  | 11 | 5 | 5 | 162655.9 | 1217789  | 563012.9 |
| 365.1892 | 38.13017 | 38.08367 | 38.20067 | 9  | 4 | 5 | 1109704  | 2729592  | 4320629  |
| 457.5185 | 26.8915  | 26.834   | 26.92167 | 6  | 2 | 4 | 38396.04 | 31654.77 | 43452.04 |
| 701.3547 | 33.15717 | 33.14283 | 33.15733 | 3  | 0 | 3 | 92093.98 | 19688.16 | 14098.99 |
| 778.2582 | 41.19317 | 41.1635  | 41.25083 | 9  | 4 | 5 | 424456.3 | 652970.4 | 566224.9 |
| 410.3094 | 10.53443 | 10.4986  | 10.5518  | 4  | 3 | 1 | 104572   | 69137.09 | 53092.16 |
| 921.6928 | 44.46975 | 44.455   | 44.537   | 10 | 5 | 5 | 754316.3 | 6489394  | 2583990  |
| 541.1556 | 21.75275 | 21.61633 | 21.75667 | 4  | 0 | 4 | 417858.3 | 9482.748 | 11878.53 |
| 349.0899 | 26.90858 | 26.8555  | 26.93683 | 6  | 2 | 4 | 59926.85 | 60998.63 | 80597.37 |
| 440.1713 | 9.693383 | 9.61695  | 9.76485  | 6  | 4 | 2 | 775910.6 | 754162.6 | 773532.5 |
| 367.2216 | 17.52083 | 17.51667 | 17.529   | 3  | 0 | 3 | 2071053  | 565977.9 | 551057.2 |
| 580.4301 | 43.74425 | 43.7325  | 43.76567 | 10 | 5 | 5 | 746574.3 | 8207387  | 2501339  |
| 493.7839 | 30.96483 | 30.93717 | 31.07383 | 10 | 5 | 5 | 78951.59 | 596307.8 | 258230.8 |
| 403.1382 | 10.41965 | 10.37933 | 10.65043 | 9  | 3 | 5 | 1147380  | 3250114  | 2648957  |
| 406.2034 | 19.59592 | 19.56817 | 19.65933 | 4  | 0 | 4 | 8340602  | 253647.3 | 89235.66 |
| 345.1118 | 30.99417 | 30.93567 | 31.0515  | 5  | 1 | 4 | 61432.52 | 97508.85 | 95225.38 |
| 487.1631 | 15.48917 | 15.47945 | 15.5424  | 3  | 0 | 3 | 39421.95 | 17908.38 | 12671.06 |
| 621.2952 | 10.67863 | 10.6177  | 10.75237 | 4  | 0 | 4 | 406344.9 | 247810   | 327282.4 |
| 290.0925 | 18.16667 | 18.124   | 18.18667 | 4  | 4 | 0 | 46399.13 | 178858.6 | 140265.6 |
| 366.2184 | 17.51875 | 17.50183 | 17.529   | 4  | 0 | 4 | 8418950  | 132986.2 | 61190.93 |
| 591.2992 | 25.68433 | 25.66133 | 25.74283 | 4  | 0 | 4 | 88913.97 | 101016.3 | 106059.5 |
| 304.2357 | 33.15733 | 33.13983 | 33.17267 | 5  | 0 | 5 | 1020245  | 2176709  | 1394048  |
| 757.3468 | 26.42033 | 26.36383 | 26.42867 | 3  | 0 | 3 | 284503.4 | 9795.562 | 7019.605 |
| 549.0022 | 38.15417 | 38.09733 | 38.22217 | 5  | 1 | 4 | 66552.77 | 91376.93 | 188044.3 |
| 405.2235 | 23.0335  | 22.943   | 23.045   | 7  | 3 | 4 | 151581.4 | 161421.1 | 162956.1 |
| 576.3444 | 28.35917 | 28.1615  | 28.3805  | 4  | 1 | 3 | 182613.3 | 248603   | 74112.25 |
| 977.44   | 10.72183 | 10.69263 | 10.7264  | 3  | 0 | 3 | 781408.8 | 61114.44 | 100099.3 |

|          |          |          |          |    |   |   |          |          |          |
|----------|----------|----------|----------|----|---|---|----------|----------|----------|
| 519.0064 | 38.13883 | 38.07783 | 38.21533 | 6  | 1 | 5 | 80750.38 | 67065.93 | 144188.8 |
| 333.028  | 36.9765  | 36.94767 | 37.02017 | 3  | 0 | 3 | 70502.88 | 0        | 0        |
| 320.2063 | 34.00967 | 33.938   | 34.05133 | 5  | 3 | 2 | 143983.5 | 932914.4 | 597113.1 |
| 544.9257 | 11.18841 | 11.10733 | 11.19912 | 4  | 0 | 4 | 65573.88 | 35340.37 | 55224.88 |
| 178.0583 | 17.14017 | 17.0515  | 17.1685  | 10 | 5 | 5 | 462621.1 | 1829724  | 1920556  |
| 288.1598 | 22.71733 | 22.70883 | 22.76917 | 4  | 0 | 4 | 71302.45 | 108901.4 | 26802.05 |
| 777.5457 | 42.59867 | 42.56083 | 42.66267 | 10 | 5 | 5 | 317431.7 | 2528760  | 967275.1 |
| 684.6834 | 9.526183 | 9.473767 | 9.596683 | 8  | 5 | 3 | 26083428 | 36400899 | 30232704 |
| 437.0025 | 22.136   | 22.02083 | 22.201   | 7  | 2 | 5 | 438944.8 | 846625.9 | 1206439  |
| 402.1972 | 10.45228 | 10.37973 | 10.4545  | 3  | 3 | 0 | 1678136  | 2217976  | 3019545  |
| 691.4988 | 43.09325 | 43.034   | 43.14367 | 6  | 3 | 3 | 49779.85 | 298043.1 | 127222.2 |
| 420.5107 | 26.24575 | 26.22483 | 26.28967 | 4  | 1 | 3 | 56327.84 | 67462.12 | 130105   |
| 299.6336 | 29.21433 | 29.18517 | 29.32917 | 10 | 5 | 5 | 6056262  | 10818958 | 18146922 |
| 467.1026 | 37.88033 | 37.8545  | 37.92033 | 8  | 5 | 3 | 67057.78 | 816632.6 | 213380.5 |
| 725.3628 | 43.63475 | 43.57267 | 43.721   | 4  | 0 | 4 | 55474.5  | 77698.27 | 54309.39 |
| 418.2435 | 44.50358 | 44.37867 | 44.6265  | 6  | 3 | 1 | 61033.36 | 628175.4 | 154458.4 |
| 646.4695 | 43.32258 | 43.2925  | 43.3515  | 10 | 5 | 5 | 747225.4 | 9803762  | 2463005  |
| 352.1844 | 22.06083 | 21.98917 | 22.06833 | 6  | 3 | 3 | 82699.88 | 375590.7 | 172207.7 |
| 786.5952 | 38.61317 | 38.5275  | 38.63283 | 3  | 0 | 3 | 29270.97 | 57620.7  | 66277.57 |
| 315.1231 | 23.59108 | 23.517   | 23.60533 | 8  | 3 | 5 | 121725.8 | 477008.8 | 414348.5 |
| 446.9335 | 22.12583 | 22.06433 | 22.15117 | 4  | 1 | 3 | 53822.14 | 119604   | 190685.5 |
| 324.1602 | 9.483542 | 9.43065  | 9.537367 | 4  | 1 | 3 | 2337850  | 1417214  | 2538715  |
| 300.1352 | 29.22083 | 29.19333 | 29.32917 | 8  | 3 | 5 | 1908342  | 3200406  | 5637600  |
| 500.1794 | 29.64417 | 29.57833 | 29.65167 | 7  | 2 | 5 | 503019.9 | 863244.3 | 1617151  |
| 1231.884 | 43.48517 | 43.44217 | 43.4995  | 3  | 0 | 3 | 61021.71 | 189668.5 | 137341.6 |
| 310.3302 | 35.154   | 35.14667 | 35.16167 | 4  | 3 | 1 | 19709.27 | 73131.13 | 54681.08 |
| 1383.987 | 9.44975  | 9.416233 | 9.537367 | 3  | 0 | 3 | 2867053  | 310273.2 | 681870.6 |
| 499.3684 | 8.8937   | 8.7127   | 9.003317 | 7  | 4 | 3 | 477688   | 1236473  | 968130   |
| 561.2639 | 9.215108 | 9.101033 | 9.26485  | 6  | 4 | 2 | 6601506  | 13803945 | 13631036 |
| 744.5844 | 44.974   | 44.94483 | 44.97533 | 10 | 5 | 5 | 465347.4 | 1984328  | 550412.1 |
| 379.1246 | 20.58967 | 20.411   | 20.63733 | 5  | 4 | 1 | 79378.44 | 327844.1 | 202752.6 |
| 566.2033 | 28.34867 | 28.32983 | 28.3815  | 3  | 3 | 0 | 103807.7 | 314595.8 | 319604.9 |
| 300.9925 | 23.26842 | 23.26017 | 23.32667 | 4  | 1 | 3 | 92193.47 | 90886.79 | 124421.8 |
| 539.9719 | 26.42033 | 26.36383 | 26.44317 | 3  | 0 | 3 | 153564.5 | 64728.57 | 83285.75 |
| 563.261  | 9.212583 | 9.101033 | 9.254883 | 5  | 3 | 2 | 3892002  | 7584961  | 7616831  |
| 1457.948 | 9.537367 | 9.506667 | 9.577883 | 3  | 0 | 3 | 3828002  | 1138636  | 893718.4 |
| 846.6534 | 39.22433 | 39.10883 | 39.3475  | 8  | 3 | 5 | 2521738  | 724895.2 | 794115.3 |
| 999.5015 | 43.58667 | 43.54783 | 43.64667 | 5  | 1 | 4 | 62845.96 | 130175.6 | 170415.2 |
| 554.1057 | 35.08833 | 35.07    | 35.1605  | 3  | 0 | 3 | 37444.28 | 3775.1   | 3513.315 |
| 716.326  | 41.25083 | 41.1635  | 41.267   | 5  | 3 | 2 | 34637.04 | 46121.25 | 32462.2  |
| 725.2108 | 32.2365  | 32.14983 | 32.26967 | 3  | 0 | 3 | 94945.91 | 77308.18 | 136855.2 |
| 278.8971 | 2.302    | 2.052283 | 2.307933 | 3  | 0 | 3 | 91167.83 | 0        | 0        |
| 828.2583 | 8.7393   | 8.497367 | 8.822367 | 3  | 3 | 0 | 382988.1 | 776372   | 850527.1 |
| 754.4447 | 40.49467 | 40.44783 | 40.5075  | 4  | 4 | 0 | 34883.49 | 194058.9 | 121415.9 |
| 407.2066 | 19.59592 | 19.56817 | 19.65933 | 4  | 0 | 4 | 2404246  | 69941.27 | 66276.62 |
| 407.656  | 41.178   | 41.16317 | 41.23617 | 7  | 2 | 5 | 103452   | 103257.9 | 128301.9 |
| 401.1644 | 20.61958 | 20.56783 | 20.66967 | 6  | 4 | 2 | 110233   | 807645.2 | 475752.3 |

|          |          |          |          |    |   |   |          |          |          |
|----------|----------|----------|----------|----|---|---|----------|----------|----------|
| 557.9153 | 43.87958 | 43.85333 | 43.8995  | 10 | 5 | 5 | 1782848  | 21289151 | 4292965  |
| 801.2826 | 31.31517 | 31.30467 | 31.34333 | 3  | 0 | 3 | 98936.87 | 1041.843 | 2329.633 |
| 385.0474 | 9.684133 | 9.657717 | 9.751083 | 7  | 4 | 3 | 1037568  | 1027809  | 1157716  |
| 350.0976 | 29.24233 | 29.2135  | 29.32917 | 7  | 2 | 5 | 377456.2 | 755496.4 | 1624864  |
| 407.218  | 29.70967 | 29.66633 | 29.71    | 3  | 0 | 3 | 52441.99 | 34021.5  | 16487.27 |
| 321.1164 | 25.68733 | 25.64267 | 25.705   | 8  | 5 | 3 | 184304.5 | 641893.9 | 644957.1 |
| 377.0056 | 7.46635  | 7.26375  | 7.521283 | 4  | 3 | 1 | 1116442  | 10924702 | 10171597 |
| 381.1216 | 20.5745  | 20.42583 | 20.60717 | 3  | 3 | 0 | 39412.07 | 183962.4 | 128543.6 |
| 1099.805 | 43.84742 | 43.81967 | 43.8705  | 4  | 1 | 3 | 74901.45 | 348849.8 | 226078   |
| 265.1951 | 37.02875 | 37.0065  | 37.03517 | 4  | 0 | 4 | 65301.46 | 143662.7 | 26241.95 |
| 389.4707 | 9.671275 | 9.61695  | 9.71975  | 6  | 4 | 2 | 1015109  | 1184886  | 885501.7 |
| 565.1412 | 38.8755  | 38.85333 | 38.89767 | 3  | 0 | 3 | 53649.96 | 5252.405 | 2085.023 |
| 422.0838 | 19.1455  | 19.12517 | 19.203   | 5  | 1 | 4 | 87474.26 | 44075.53 | 65990.27 |
| 562.9613 | 32.13375 | 32.10667 | 32.173   | 4  | 1 | 3 | 38884.39 | 35086.37 | 78455.5  |
| 464.8478 | 33.879   | 33.862   | 33.92083 | 4  | 1 | 3 | 58934.24 | 66036.48 | 41525.02 |
| 286.1114 | 19.17433 | 19.1455  | 19.203   | 3  | 0 | 3 | 71225.95 | 32426.94 | 29735.89 |
| 412.1762 | 15.21732 | 15.20077 | 15.27622 | 5  | 2 | 3 | 54160.56 | 142703.9 | 168967.9 |
| 349.7092 | 20.76733 | 20.7015  | 20.7735  | 3  | 0 | 3 | 35374.75 | 27801.87 | 31701.19 |
| 747.0193 | 42.71217 | 42.67433 | 42.7805  | 5  | 2 | 3 | 47603.48 | 255796.9 | 90231.15 |
| 490.1166 | 29.69517 | 29.66633 | 29.72467 | 3  | 0 | 3 | 84759.41 | 15244.64 | 26349.19 |
| 382.088  | 30.78433 | 30.71867 | 30.86417 | 4  | 0 | 4 | 159397.4 | 345072   | 635063.8 |
| 459.1933 | 25.30742 | 25.28967 | 25.327   | 4  | 0 | 4 | 8007511  | 241988.1 | 85508.26 |
| 847.6567 | 39.23217 | 39.18383 | 39.2825  | 7  | 2 | 5 | 1247334  | 336277.7 | 399715.9 |
| 295.0886 | 20.716   | 20.59983 | 20.74417 | 3  | 0 | 3 | 52374.29 | 82930.34 | 55457.56 |
| 536.349  | 26.11683 | 26.09383 | 26.13383 | 3  | 0 | 3 | 9934112  | 170906.6 | 63733.18 |
| 615.0621 | 23.181   | 23.167   | 23.20917 | 7  | 2 | 5 | 423817.7 | 787454.3 | 1547580  |
| 536.0749 | 24.631   | 24.594   | 24.86733 | 5  | 1 | 3 | 32709.69 | 26803.7  | 57630.49 |
| 1724.238 | 9.468883 | 9.43065  | 9.55075  | 4  | 1 | 3 | 16783470 | 4099590  | 7453514  |
| 355.204  | 27.65683 | 27.62417 | 27.67733 | 4  | 0 | 4 | 45979.8  | 100314.9 | 57375.54 |
| 1275.91  | 43.31525 | 43.23317 | 43.33683 | 4  | 1 | 3 | 40412.01 | 77238.3  | 66931.04 |
| 498.3463 | 30.96483 | 30.93717 | 31.07383 | 10 | 5 | 5 | 2061373  | 16367498 | 7142236  |
| 470.2512 | 10.71462 | 10.63273 | 10.76935 | 6  | 1 | 5 | 1137443  | 623599.1 | 716209.9 |
| 524.0175 | 30.777   | 30.474   | 30.83517 | 5  | 1 | 4 | 203696.8 | 374338.9 | 837047.3 |
| 525.1273 | 23.11333 | 23.10367 | 23.196   | 3  | 3 | 0 | 106020.7 | 290810   | 304009.4 |
| 572.0933 | 31.34617 | 31.34333 | 31.35783 | 3  | 0 | 3 | 68102.7  | 4592.176 | 6005.714 |
| 510.3557 | 33.44417 | 33.3705  | 33.6115  | 9  | 5 | 4 | 540058.4 | 3784863  | 2448135  |
| 199.1693 | 24.8845  | 24.83167 | 24.93233 | 3  | 3 | 0 | 478440.7 | 3355999  | 2419870  |
| 464.8147 | 29.67375 | 29.66617 | 29.71233 | 4  | 3 | 1 | 70358.48 | 229688.9 | 159933.9 |
| 490.9394 | 25.67708 | 25.64833 | 25.69883 | 6  | 1 | 5 | 359003   | 885030.6 | 1926676  |
| 416.1874 | 29.33158 | 29.313   | 29.38767 | 4  | 0 | 4 | 1325297  | 99856.16 | 70279.84 |
| 856.5331 | 11.05106 | 10.9623  | 11.0843  | 4  | 1 | 3 | 149175.6 | 102520.3 | 150949.7 |
| 707.1825 | 30.96167 | 30.928   | 30.96417 | 3  | 3 | 0 | 67565.17 | 350796.8 | 215620   |
| 654.3091 | 30.24858 | 30.238   | 30.33317 | 8  | 5 | 3 | 203620.2 | 867204.6 | 804369.8 |
| 535.4005 | 44.02058 | 43.99683 | 44.04317 | 10 | 5 | 5 | 2274359  | 27300046 | 5505635  |
| 484.0725 | 11.09472 | 10.9623  | 11.14915 | 4  | 0 | 4 | 109730.8 | 8809.473 | 12624.58 |
| 423.1589 | 10.40133 | 10.37652 | 10.42227 | 4  | 0 | 4 | 2.48E+08 | 8.09E+08 | 9.1E+08  |
| 471.0963 | 38.1275  | 38.1085  | 38.20067 | 5  | 1 | 4 | 99285.54 | 148252.1 | 275670.5 |

|          |          |          |          |    |   |   |          |          |          |
|----------|----------|----------|----------|----|---|---|----------|----------|----------|
| 307.152  | 17.299   | 17.2395  | 17.31033 | 3  | 0 | 3 | 51452.2  | 70088.31 | 30785.11 |
| 297.0828 | 37.42442 | 37.3955  | 37.47317 | 10 | 5 | 5 | 172867.5 | 1540002  | 740341.5 |
| 562.2658 | 9.187083 | 9.101033 | 9.243133 | 3  | 3 | 0 | 1809505  | 3133633  | 3282529  |
| 554.0596 | 42.39517 | 42.36383 | 42.42017 | 7  | 4 | 3 | 70112.93 | 693808.1 | 127067   |
| 431.1986 | 20.26167 | 20.246   | 20.599   | 5  | 1 | 4 | 2554592  | 137943.9 | 224164.3 |
| 789.4307 | 9.550042 | 9.515    | 9.596683 | 4  | 3 | 1 | 2520102  | 3216483  | 2129504  |
| 200.4222 | 2.14115  | 2.045917 | 2.18535  | 3  | 0 | 3 | 57468.17 | 0        | 0        |
| 470.5261 | 29.15575 | 29.14033 | 29.2115  | 6  | 1 | 5 | 128780.5 | 156885.3 | 338274   |
| 487.0203 | 22.943   | 22.938   | 23.01033 | 3  | 3 | 0 | 39501.11 | 89066.6  | 90112.94 |
| 349.2109 | 21.473   | 21.38433 | 21.49317 | 3  | 0 | 3 | 276191.4 | 60960.83 | 17440.9  |
| 782.1962 | 30.25525 | 30.23    | 30.26683 | 4  | 3 | 1 | 55526.61 | 210749.1 | 177325.9 |
| 298.6359 | 29.23517 | 29.19333 | 29.31467 | 6  | 1 | 5 | 306694.6 | 464925.5 | 853867.6 |
| 345.1773 | 20.15033 | 20.10567 | 20.25267 | 5  | 2 | 3 | 142601.8 | 264208.6 | 232561   |
| 327.6486 | 32.20633 | 32.146   | 32.20817 | 3  | 0 | 3 | 49697.01 | 36204.92 | 52953.96 |
| 255.5825 | 23.181   | 23.167   | 23.19583 | 7  | 2 | 5 | 267396.3 | 542406.6 | 875182.3 |
| 1724.739 | 9.487708 | 9.43065  | 9.584433 | 6  | 3 | 3 | 34531536 | 6753436  | 11776168 |
| 386.0627 | 29.24233 | 29.19917 | 29.3435  | 5  | 1 | 4 | 93060.66 | 116100.4 | 252758.2 |
| 322.2857 | 23.00417 | 22.9685  | 23.035   | 5  | 1 | 4 | 49878.87 | 47747.48 | 77313.3  |
| 334.1302 | 10.99651 | 10.89338 | 11.14915 | 4  | 1 | 3 | 101608.4 | 102458.5 | 101355.1 |
| 535.9021 | 44.03    | 44.01133 | 44.0585  | 10 | 5 | 5 | 1364052  | 16349940 | 3254380  |
| 639.2992 | 26.06483 | 26.02683 | 26.08883 | 3  | 0 | 3 | 186723.5 | 11145.89 | 5347.601 |
| 267.1958 | 27.20558 | 27.191   | 27.252   | 4  | 0 | 4 | 5944670  | 26722632 | 29156623 |
| 436.7272 | 2.100667 | 2.06535  | 2.2699   | 3  | 0 | 3 | 96214.73 | 0        | 0        |
| 483.0247 | 22.943   | 22.938   | 23.02483 | 3  | 3 | 0 | 117230   | 391083.4 | 395140   |
| 554.758  | 30.957   | 30.9325  | 31.07967 | 4  | 3 | 1 | 78318.76 | 226886.4 | 189288.5 |
| 471.9452 | 22.136   | 22.09383 | 22.1735  | 5  | 1 | 4 | 110559.3 | 350129.2 | 573892.5 |
| 537.3521 | 26.4245  | 26.36383 | 26.45817 | 4  | 0 | 4 | 13778590 | 8613.668 | 8574.694 |
| 624.4566 | 43.45533 | 43.44033 | 43.4725  | 10 | 5 | 5 | 817954.2 | 9857917  | 2300355  |
| 396.5636 | 29.163   | 29.12633 | 29.19683 | 5  | 0 | 5 | 83546.39 | 131534.6 | 270218.5 |
| 683.3752 | 19.912   | 19.89267 | 20.02417 | 3  | 0 | 3 | 185015.9 | 12318.3  | 10040.63 |
| 297.019  | 29.6275  | 29.57833 | 29.65167 | 5  | 1 | 4 | 58509.82 | 106136.7 | 207169   |
| 230.0239 | 22.034   | 22.022   | 22.07867 | 3  | 0 | 3 | 260023.1 | 245578.1 | 256668.1 |
| 877.6664 | 44.62175 | 44.58833 | 44.70217 | 10 | 5 | 5 | 676449.9 | 6132135  | 2196849  |
| 565.258  | 9.187083 | 9.101033 | 9.243133 | 3  | 3 | 0 | 2284965  | 4457110  | 4670506  |
| 385.5612 | 29.2425  | 29.22317 | 29.32917 | 6  | 1 | 5 | 272918.7 | 442478.7 | 962102.8 |
| 357.2756 | 13.0467  | 13.02208 | 13.12258 | 6  | 3 | 3 | 39613.93 | 77342.93 | 40779.18 |
| 1725.24  | 9.460417 | 9.3803   | 9.55075  | 5  | 2 | 3 | 40498600 | 7569728  | 13697269 |
| 324.2902 | 12.49137 | 12.45115 | 12.50232 | 6  | 2 | 4 | 78957.44 | 108758   | 131375.4 |
| 321.2129 | 33.28867 | 33.08433 | 33.30617 | 5  | 0 | 4 | 729206.4 | 144721   | 114734.7 |
| 442.9919 | 22.9815  | 22.928   | 23.01033 | 5  | 5 | 0 | 94774.13 | 307435.9 | 320684.4 |
| 310.636  | 29.14717 | 29.1185  | 29.2115  | 6  | 1 | 5 | 146523   | 242037.6 | 410294   |
| 719.7916 | 10.66473 | 10.63273 | 10.77118 | 7  | 2 | 5 | 504079.6 | 561589.8 | 583295.6 |
| 294.2243 | 28.1175  | 28.02967 | 28.208   | 5  | 1 | 4 | 21724404 | 96542732 | 1.09E+08 |
| 813.2223 | 22.9685  | 22.94583 | 22.97483 | 3  | 0 | 3 | 75383.09 | 1855.179 | 4148.307 |
| 354.1368 | 26.346   | 26.28233 | 26.35667 | 5  | 0 | 5 | 50712.19 | 110521.9 | 158262   |
| 317.0673 | 28.10267 | 28.02967 | 28.1905  | 3  | 0 | 3 | 35878.41 | 86891.19 | 57900.93 |
| 464.9084 | 18.12033 | 18.00167 | 18.22    | 7  | 2 | 4 | 179984.5 | 644240.9 | 764173.9 |

|          |          |          |          |    |   |   |          |          |          |
|----------|----------|----------|----------|----|---|---|----------|----------|----------|
| 496.4211 | 37.82175 | 37.794   | 37.8535  | 4  | 3 | 1 | 77436.26 | 286086.2 | 88175.92 |
| 463.8066 | 2.11085  | 2.052283 | 2.114383 | 3  | 0 | 3 | 566682.2 | 0        | 0        |
| 513.2799 | 11.17266 | 11.1232  | 11.27893 | 4  | 1 | 3 | 1325386  | 33557.68 | 27254.31 |
| 275.6336 | 30.98217 | 30.94733 | 31.07383 | 9  | 4 | 5 | 1046047  | 2500089  | 4835522  |
| 628.3547 | 10.37991 | 10.36155 | 10.41848 | 6  | 1 | 5 | 4930913  | 1694045  | 2526342  |
| 473.1631 | 33.125   | 33.10517 | 33.17183 | 3  | 0 | 3 | 54768.4  | 574556.4 | 318232.4 |
| 382.2227 | 33.42333 | 33.4195  | 33.43533 | 3  | 0 | 3 | 189709.8 | 275134.3 | 116757.8 |
| 564.2072 | 28.34517 | 28.31117 | 28.48133 | 7  | 5 | 2 | 147576.2 | 597494.5 | 619025.1 |
| 374.2714 | 28.92183 | 28.907   | 28.95917 | 9  | 4 | 5 | 119250.6 | 299739.6 | 307058.5 |
| 783.3319 | 27.939   | 27.91167 | 27.95433 | 3  | 0 | 3 | 373318.3 | 3410.476 | 4714.612 |
| 220.0394 | 2.7754   | 2.767483 | 2.85205  | 3  | 0 | 3 | 483598.4 | 334128.6 | 60187.54 |
| 644.951  | 30.74767 | 30.48833 | 30.84967 | 5  | 1 | 4 | 127542.4 | 298231.3 | 635831.2 |
| 249.0659 | 18.15675 | 18.0745  | 18.17483 | 4  | 4 | 0 | 40271.52 | 174359.6 | 130918.9 |
| 646.9279 | 38.13875 | 38.09733 | 38.21533 | 4  | 1 | 3 | 88271.63 | 45688.77 | 93830.51 |
| 388.1403 | 42.48817 | 42.44567 | 42.636   | 3  | 0 | 3 | 54797.9  | 3250.831 | 3519.865 |
| 467.1155 | 22.74792 | 22.73233 | 22.81333 | 4  | 1 | 3 | 75561.92 | 33437.13 | 45525.25 |
| 317.1209 | 25.689   | 25.64683 | 25.7215  | 7  | 5 | 2 | 525201.3 | 2066429  | 1970933  |
| 288.1353 | 29.14033 | 29.1185  | 29.2115  | 7  | 2 | 5 | 352530   | 919141.6 | 1569796  |
| 408.5637 | 29.257   | 29.228   | 29.32917 | 5  | 1 | 4 | 248846.4 | 217075.5 | 484087.6 |
| 391.2962 | 13.83905 | 13.76993 | 13.93213 | 10 | 5 | 5 | 1827784  | 5455174  | 6275006  |
| 370.5482 | 26.2395  | 26.22317 | 26.30383 | 5  | 1 | 4 | 99646.44 | 101853.5 | 208852.8 |
| 345.0457 | 12.02803 | 12.01362 | 12.23855 | 3  | 0 | 3 | 98319.64 | 7857.049 | 11471.14 |
| 351.0981 | 29.228   | 29.21333 | 29.29983 | 5  | 1 | 4 | 86166.62 | 175432.7 | 242000.6 |
| 304.6293 | 29.21367 | 29.18517 | 29.26133 | 7  | 4 | 3 | 152338.4 | 570314.7 | 526135.5 |
| 359.0614 | 14.2308  | 14.19772 | 14.2638  | 3  | 0 | 3 | 432930.9 | 36041.25 | 66587.05 |
| 489.362  | 29.98858 | 29.951   | 30.01183 | 10 | 5 | 5 | 250758.5 | 2509529  | 520876.1 |
| 250.0866 | 39.433   | 39.34067 | 39.45417 | 10 | 5 | 5 | 85395.05 | 770895.1 | 224109.4 |
| 268.1992 | 27.2235  | 27.20017 | 27.252   | 4  | 0 | 4 | 784367.8 | 2442856  | 2717410  |
| 223.097  | 17.13325 | 17.02267 | 17.19717 | 10 | 5 | 5 | 3982680  | 18609098 | 18424713 |
| 696.3665 | 31.3185  | 31.31517 | 31.32883 | 3  | 0 | 3 | 66496    | 78388.21 | 20365.78 |
| 595.4074 | 10.00425 | 9.93755  | 10.02258 | 5  | 3 | 2 | 892753.5 | 237751.1 | 243762.9 |
| 177.0549 | 17.14017 | 17.03717 | 17.19717 | 10 | 5 | 5 | 4284314  | 22751080 | 22335327 |
| 580.9315 | 43.73517 | 43.68867 | 43.76917 | 10 | 5 | 5 | 172584   | 1717825  | 371330.1 |
| 434.3845 | 26.34067 | 26.308   | 26.374   | 5  | 2 | 3 | 35733.41 | 46410.75 | 39730.88 |
| 579.427  | 43.738   | 43.7325  | 43.76917 | 10 | 5 | 5 | 3180776  | 39482142 | 10778975 |
| 571.9169 | 43.74333 | 43.71783 | 43.78433 | 9  | 5 | 4 | 140049.2 | 1254560  | 244349.5 |
| 621.5703 | 8.76595  | 8.51555  | 8.808367 | 3  | 3 | 0 | 454695.8 | 568591.5 | 683267.9 |
| 392.2994 | 13.83913 | 13.77598 | 13.91533 | 8  | 4 | 4 | 383372   | 1003978  | 1155499  |
| 655.2785 | 27.67733 | 27.66933 | 27.74317 | 3  | 0 | 3 | 117812.3 | 13147.13 | 8998.479 |
| 579.1184 | 38.88283 | 38.85333 | 38.91067 | 3  | 0 | 3 | 38649.26 | 1864.126 | 2552.84  |
| 469.0616 | 25.52875 | 25.49183 | 25.5365  | 4  | 0 | 4 | 57948.38 | 65842.72 | 134008.9 |
| 598.4534 | 30.56958 | 30.562   | 30.57583 | 4  | 1 | 3 | 39916.15 | 42964.45 | 56913.18 |
| 867.3626 | 10.65001 | 10.63273 | 10.66922 | 4  | 0 | 4 | 472216.5 | 351468.4 | 371202.2 |
| 967.7268 | 44.33667 | 44.27733 | 44.65617 | 8  | 3 | 4 | 57196.09 | 329975.9 | 171415.1 |
| 434.9133 | 18.15833 | 18.047   | 18.19067 | 6  | 2 | 4 | 308234.4 | 943057.7 | 1293268  |
| 491.2992 | 27.15533 | 27.05833 | 27.186   | 4  | 0 | 4 | 54815.73 | 30905.58 | 6698.434 |
| 383.1563 | 33.15733 | 33.13983 | 33.1865  | 3  | 0 | 3 | 149312.2 | 220892   | 127733.1 |

|          |          |          |          |    |   |   |          |          |          |
|----------|----------|----------|----------|----|---|---|----------|----------|----------|
| 460.1965 | 25.30192 | 25.28633 | 25.34183 | 4  | 0 | 4 | 2379173  | 37269.14 | 13405.87 |
| 748.2071 | 30.90067 | 30.86367 | 30.9455  | 4  | 1 | 3 | 54660.73 | 63050.95 | 79105.37 |
| 610.3864 | 24.52925 | 24.50683 | 24.56467 | 4  | 0 | 4 | 3349872  | 44187.99 | 22672.4  |
| 184.0735 | 30.96558 | 30.943   | 31.2865  | 8  | 5 | 2 | 186906.9 | 1684410  | 1024574  |
| 321.2279 | 18.28908 | 18.268   | 18.3265  | 8  | 4 | 4 | 62630.25 | 128748   | 76572.08 |
| 437.2732 | 19.80267 | 19.77133 | 19.81917 | 3  | 3 | 0 | 192505.6 | 690350.4 | 802229   |
| 363.1877 | 20.84625 | 20.82183 | 20.8615  | 4  | 0 | 4 | 176041.1 | 177283.7 | 71786.41 |
| 424.3094 | 44.91508 | 44.669   | 44.97467 | 10 | 5 | 5 | 59824.35 | 678887.6 | 155191.3 |
| 156.9949 | 21.69342 | 21.54233 | 21.7275  | 4  | 1 | 3 | 42649.42 | 76700.88 | 97070.34 |
| 254.9651 | 4.083433 | 3.980533 | 4.168433 | 3  | 0 | 3 | 1048819  | 1881065  | 2311249  |
| 472.3403 | 29.64442 | 29.56383 | 29.66617 | 4  | 3 | 1 | 56352.93 | 259007.6 | 131416.9 |
| 560.9031 | 28.92183 | 28.8925  | 29.064   | 9  | 4 | 5 | 224913.1 | 500558.5 | 429553   |
| 688.5427 | 38.8975  | 38.8755  | 38.89767 | 3  | 0 | 3 | 140823.8 | 104352.1 | 29449.16 |
| 744.8759 | 30.79183 | 30.79167 | 30.86417 | 3  | 0 | 3 | 76567.09 | 115401.6 | 254157.9 |
| 255.1571 | 17.05383 | 17.01983 | 17.06667 | 5  | 3 | 2 | 130000.2 | 487516.3 | 211635.4 |
| 589.3897 | 43.60117 | 43.563   | 43.6335  | 9  | 4 | 5 | 238450.5 | 921005.8 | 926475.8 |
| 334.0742 | 24.6015  | 24.57683 | 24.61617 | 4  | 1 | 3 | 48959.93 | 39349.91 | 75873.64 |
| 422.3998 | 38.07642 | 38.0535  | 38.25133 | 10 | 5 | 5 | 1419247  | 7583565  | 5747682  |
| 417.2734 | 27.87783 | 27.83583 | 27.89383 | 3  | 0 | 3 | 64719.97 | 15821.76 | 10981.77 |
| 745.5379 | 18.69017 | 18.641   | 18.69367 | 7  | 5 | 2 | 888355.7 | 2109601  | 2243287  |
| 436.3089 | 32.615   | 32.54567 | 32.656   | 9  | 4 | 5 | 202202.6 | 1638436  | 978020.4 |
| 418.1318 | 26.297   | 26.23883 | 26.34133 | 7  | 2 | 5 | 178983.8 | 286832.2 | 459880.3 |
| 759.355  | 29.05867 | 29.0215  | 29.0645  | 3  | 0 | 3 | 112974.7 | 20854.54 | 9587.756 |
| 827.9251 | 8.75955  | 8.497367 | 8.808367 | 4  | 4 | 0 | 259980   | 469882.2 | 535571.7 |
| 430.2076 | 43.61033 | 43.578   | 43.63067 | 4  | 1 | 3 | 90726.21 | 615072.2 | 149844.4 |
| 311.6337 | 29.12633 | 29.111   | 29.2115  | 9  | 4 | 5 | 2246805  | 6273730  | 10419027 |
| 235.0693 | 23.17025 | 23.10367 | 23.19433 | 8  | 3 | 5 | 647625.4 | 1333122  | 2063954  |
| 534.2408 | 23.58533 | 23.56067 | 23.6005  | 4  | 0 | 4 | 4459598  | 7402.759 | 8317.396 |
| 318.1381 | 30.23533 | 30.23033 | 30.24433 | 3  | 3 | 0 | 22376.34 | 50549.06 | 55031.13 |
| 394.1624 | 26.353   | 26.31167 | 26.37133 | 5  | 2 | 3 | 61530.3  | 317999.5 | 113522.5 |
| 888.6634 | 36.61667 | 36.49917 | 36.73167 | 7  | 2 | 3 | 95217.32 | 168251.2 | 214481.8 |
| 504.1307 | 10.7167  | 10.6789  | 10.76465 | 3  | 3 | 0 | 392321.3 | 580802.7 | 367092.4 |
| 828.4158 | 9.700183 | 9.65795  | 9.7372   | 5  | 1 | 4 | 3697476  | 403704.1 | 758298.5 |
| 800.0604 | 42.5005  | 42.45383 | 42.5495  | 9  | 4 | 5 | 168907.5 | 1274120  | 510252.7 |
| 376.0847 | 17.0075  | 16.97933 | 17.03183 | 3  | 0 | 3 | 35411.12 | 9360.273 | 8357.707 |
| 451.3284 | 8.933233 | 8.78305  | 9.028917 | 5  | 3 | 2 | 3729873  | 15368501 | 13212964 |
| 384.5637 | 31.00133 | 30.979   | 31.07383 | 6  | 1 | 5 | 310874   | 709068.4 | 1573165  |
| 287.8893 | 17.78083 | 17.327   | 17.9575  | 8  | 4 | 2 | 5212865  | 33302748 | 56230988 |
| 306.6207 | 30.82067 | 30.74683 | 30.84933 | 5  | 1 | 4 | 233959.1 | 197521.9 | 373773.5 |
| 480.3024 | 22.85933 | 22.84267 | 22.87467 | 3  | 0 | 3 | 58302.48 | 115964.7 | 67144.82 |
| 784.3355 | 27.939   | 27.927   | 27.95433 | 3  | 0 | 3 | 175085.4 | 2101.028 | 3021.091 |
| 515.2564 | 9.187083 | 9.101033 | 9.231383 | 3  | 3 | 0 | 1491274  | 3060880  | 2824941  |
| 652.2938 | 29.1255  | 29.09717 | 29.22633 | 9  | 5 | 4 | 266938.6 | 1048606  | 923261.5 |
| 675.4209 | 9.526183 | 9.463983 | 9.596683 | 8  | 5 | 3 | 10710675 | 16904851 | 15926936 |
| 384.9164 | 8.7936   | 8.551733 | 8.8441   | 5  | 4 | 1 | 87801.87 | 196922.3 | 117518.8 |
| 675.3459 | 32.80083 | 32.7855  | 32.80717 | 3  | 0 | 3 | 42969.24 | 13660.9  | 6294.373 |
| 727.3902 | 21.00667 | 20.98867 | 21.0485  | 3  | 0 | 3 | 54910.08 | 6894.158 | 5137.976 |

|          |          |          |          |    |   |   |          |          |          |
|----------|----------|----------|----------|----|---|---|----------|----------|----------|
| 526.0179 | 30.777   | 30.48833 | 30.83517 | 5  | 1 | 4 | 328236.9 | 889607.8 | 1940058  |
| 435.148  | 9.173983 | 9.0693   | 9.21955  | 3  | 3 | 0 | 596786.5 | 907345.1 | 1014821  |
| 576.0992 | 22.36267 | 22.31133 | 22.38517 | 3  | 0 | 3 | 82783.15 | 39148.39 | 51783.99 |
| 833.6404 | 44.79192 | 44.76633 | 44.876   | 10 | 5 | 5 | 643014.9 | 5492470  | 1528698  |
| 422.1113 | 30.777   | 30.51683 | 30.83517 | 5  | 1 | 4 | 121105.6 | 347954.6 | 629729.2 |
| 946.0427 | 30.97975 | 30.93567 | 31.0825  | 4  | 1 | 3 | 59904.81 | 59097    | 132144.9 |
| 196.1123 | 11.66581 | 11.64133 | 11.74457 | 4  | 1 | 3 | 64459.46 | 130836.3 | 168094.8 |
| 790.59   | 36.89933 | 36.8225  | 36.932   | 5  | 2 | 3 | 485582   | 1071442  | 766027.4 |
| 235.5709 | 23.18142 | 23.16633 | 23.1945  | 6  | 2 | 4 | 156377.7 | 241739.5 | 426464.5 |
| 500.578  | 30.99333 | 30.93717 | 31.0595  | 7  | 4 | 3 | 46540.01 | 298425.6 | 184283.9 |
| 452.8504 | 40.9585  | 40.89067 | 40.97017 | 3  | 0 | 3 | 278782.3 | 66716.73 | 64390.33 |
| 1385.486 | 9.460417 | 9.013033 | 9.584433 | 9  | 4 | 4 | 83615648 | 23090682 | 40142449 |
| 1386.488 | 9.463983 | 9.365883 | 9.584433 | 7  | 4 | 3 | 44607660 | 11743631 | 20665514 |
| 726.9096 | 31.31433 | 31.301   | 31.34333 | 3  | 0 | 3 | 110056.8 | 2965.039 | 6630.029 |
| 290.2152 | 33.5255  | 33.434   | 33.59367 | 5  | 2 | 3 | 91959.5  | 643650.9 | 465030.1 |
| 740.8812 | 30.79142 | 30.73283 | 30.8785  | 4  | 0 | 4 | 55427.92 | 48022.82 | 107382.3 |
| 246.8624 | 2.535217 | 2.471067 | 2.665583 | 5  | 0 | 5 | 1250749  | 354138.2 | 128017.8 |
| 700.1866 | 31.00133 | 30.95017 | 31.07383 | 6  | 1 | 5 | 102214.3 | 201062.9 | 375185.4 |
| 568.2019 | 28.34517 | 28.33317 | 28.36683 | 3  | 3 | 0 | 66210.9  | 190291   | 211509.6 |
| 838.8645 | 18.13517 | 18.047   | 18.16983 | 4  | 0 | 4 | 57570.76 | 56703.07 | 95703.81 |
| 368.1973 | 13.79017 | 13.76793 | 13.79247 | 3  | 0 | 3 | 187297.1 | 145352.5 | 118015.1 |
| 630.2758 | 32.102   | 32.05883 | 32.17667 | 8  | 5 | 3 | 675667.8 | 3973284  | 4206751  |
| 410.2344 | 20.21583 | 20.19533 | 20.35917 | 3  | 0 | 3 | 285619.7 | 279997   | 181251   |
| 1725.741 | 9.455083 | 9.43065  | 9.55075  | 4  | 1 | 3 | 28583514 | 5445674  | 8154879  |
| 317.2118 | 25.73867 | 25.7145  | 25.76983 | 4  | 1 | 3 | 411575.8 | 829813.8 | 757392.2 |
| 708.5487 | 10.20198 | 9.970683 | 10.22823 | 7  | 3 | 4 | 146187.3 | 182838.2 | 180433.3 |
| 447.0092 | 18.17383 | 18.1395  | 18.17483 | 3  | 3 | 0 | 21199.24 | 71645.96 | 45147.66 |
| 364.798  | 2.40765  | 2.269767 | 2.535217 | 4  | 0 | 4 | 292890.1 | 17278.21 | 7034.181 |
| 460.3428 | 31.61592 | 31.54817 | 31.749   | 6  | 3 | 3 | 36346.7  | 170070.2 | 106726.3 |
| 652.196  | 25.949   | 25.92467 | 25.975   | 3  | 0 | 3 | 76794.05 | 4821.962 | 7018.105 |
| 647.2652 | 32.08783 | 32.07183 | 32.117   | 3  | 3 | 0 | 82987.73 | 367927.9 | 438319.6 |
| 564.389  | 32.798   | 32.68217 | 32.88433 | 5  | 1 | 4 | 119198.8 | 202883.9 | 62799.63 |
| 466.1258 | 37.41983 | 37.38683 | 37.43867 | 3  | 3 | 0 | 25491.32 | 127100.2 | 74804.42 |
| 759.3409 | 29.074   | 29.0645  | 29.09233 | 3  | 0 | 3 | 91231.69 | 9565.934 | 15150.98 |
| 779.2617 | 41.19308 | 41.16333 | 41.25083 | 8  | 3 | 5 | 159140.6 | 219396.1 | 188986.6 |
| 340.1172 | 9.549717 | 9.50195  | 9.59295  | 4  | 3 | 1 | 8987527  | 1327177  | 608592.6 |
| 693.4032 | 33.17183 | 33.17183 | 33.23217 | 3  | 0 | 3 | 72414.86 | 17920.65 | 7899.897 |
| 378.2184 | 17.24242 | 17.23833 | 17.25317 | 4  | 0 | 4 | 6315743  | 459399.1 | 154970.7 |
| 401.0309 | 18.09983 | 17.97233 | 18.14683 | 4  | 1 | 3 | 56160.79 | 126983.5 | 167162.4 |
| 432.2019 | 20.26167 | 20.255   | 20.3885  | 3  | 0 | 3 | 662624.4 | 68069.37 | 51060.69 |
| 411.168  | 23.55933 | 23.54633 | 23.56133 | 3  | 0 | 3 | 56570.94 | 40466.37 | 24697.74 |
| 397.5607 | 29.14083 | 29.12067 | 29.22633 | 5  | 1 | 4 | 95463.11 | 152891.7 | 326103.1 |
| 397.7889 | 10.41907 | 10.40455 | 10.45412 | 6  | 2 | 4 | 172087.8 | 320752.9 | 387342.7 |
| 350.6037 | 30.89283 | 30.84933 | 30.95983 | 5  | 1 | 4 | 190667.7 | 335117.2 | 733192.4 |
| 447.2575 | 23.1315  | 23.10367 | 23.18183 | 6  | 4 | 2 | 56272.1  | 271457.4 | 184270.5 |
| 177.7406 | 17.11983 | 17.03717 | 17.1305  | 3  | 0 | 3 | 19610.85 | 10888.02 | 15816.91 |
| 945.5566 | 43.60167 | 43.57467 | 43.646   | 7  | 2 | 5 | 133347.6 | 230319.2 | 298310   |



|          |          |          |          |    |   |   |          |          |          |
|----------|----------|----------|----------|----|---|---|----------|----------|----------|
| 1055.778 | 44.01917 | 43.99683 | 44.119   | 5  | 1 | 4 | 82549.29 | 396665.2 | 199362   |
| 740.5528 | 43.38133 | 43.37083 | 43.39717 | 5  | 4 | 1 | 41851.18 | 334132   | 81250.41 |
| 375.2539 | 25.70417 | 25.70083 | 25.801   | 3  | 0 | 3 | 75524.45 | 15018.12 | 31216.64 |
| 604.2931 | 29.1255  | 29.09717 | 29.163   | 7  | 5 | 2 | 189494   | 640492.7 | 603334.6 |
| 536.3487 | 26.43175 | 26.36383 | 26.45817 | 4  | 0 | 4 | 37467436 | 232251.7 | 95277.38 |
| 361.2174 | 10.67933 | 10.62815 | 10.75237 | 8  | 4 | 4 | 454235.1 | 1706365  | 1945199  |
| 270.2149 | 25.50667 | 25.50317 | 25.5215  | 3  | 0 | 3 | 53340.1  | 62896.67 | 74779.15 |
| 510.3725 | 32.25108 | 32.2365  | 32.283   | 6  | 2 | 4 | 118172.8 | 327398.1 | 151651.9 |
| 347.1308 | 13.02205 | 12.9761  | 13.06607 | 3  | 3 | 0 | 40561.79 | 133760.2 | 107647.7 |
| 558.2533 | 30.95517 | 30.9495  | 30.96167 | 4  | 4 | 0 | 64671.11 | 225075.9 | 220684.1 |
| 847.6851 | 10.18593 | 9.946617 | 10.24898 | 6  | 1 | 5 | 304797.6 | 87065.64 | 74788.85 |
| 659.4931 | 34.32025 | 34.25933 | 34.371   | 10 | 5 | 5 | 109751.1 | 450500.1 | 270126.8 |
| 433.2837 | 8.87615  | 8.659567 | 8.919083 | 3  | 3 | 0 | 147206.2 | 456162.7 | 401660   |
| 345.1519 | 32.1595  | 32.13533 | 32.175   | 6  | 4 | 2 | 352373.2 | 1591337  | 1612741  |
| 324.5983 | 30.9935  | 30.96517 | 31.088   | 5  | 1 | 4 | 44613.87 | 72491    | 159448.9 |
| 384.7724 | 8.57005  | 8.5321   | 8.668683 | 5  | 3 | 2 | 221073.8 | 1493942  | 915242.7 |
| 640.9556 | 30.80633 | 30.73283 | 30.82083 | 3  | 0 | 3 | 58629.59 | 50429.32 | 112763.4 |
| 1384.985 | 9.460417 | 9.3803   | 9.64025  | 7  | 2 | 4 | 46696188 | 13519880 | 24229433 |
| 516.3323 | 42.63017 | 42.57867 | 42.6495  | 6  | 3 | 3 | 36895.97 | 126801.3 | 50694.59 |
| 632.2728 | 32.10017 | 32.05883 | 32.19133 | 7  | 5 | 2 | 372483.6 | 2028688  | 2196959  |
| 331.0309 | 10.87884 | 10.74052 | 10.9508  | 4  | 0 | 4 | 781463.3 | 63796.06 | 64563.44 |
| 195.0921 | 10.95518 | 10.86645 | 11.00872 | 3  | 0 | 3 | 8495932  | 2582815  | 2807143  |
| 916.5738 | 9.57085  | 9.5169   | 9.584867 | 4  | 1 | 3 | 1588549  | 836057.8 | 1230768  |
| 561.405  | 28.94    | 28.8925  | 29.0175  | 8  | 5 | 3 | 156813.6 | 341722.5 | 297012.6 |
| 349.2163 | 9.529408 | 9.444983 | 9.5571   | 6  | 2 | 4 | 2993107  | 2374526  | 2788453  |
| 485.0928 | 21.765   | 21.63133 | 21.76967 | 3  | 0 | 3 | 82470.27 | 20314.93 | 28823.19 |
| 454.3893 | 35.18292 | 35.1325  | 35.21983 | 6  | 1 | 5 | 160171   | 179426.9 | 340542.8 |
| 1386.989 | 9.489492 | 9.416233 | 9.5558   | 6  | 3 | 3 | 21398732 | 5995921  | 10889073 |
| 594.0919 | 28.03317 | 28.0155  | 28.07317 | 3  | 0 | 3 | 52658.27 | 3704.599 | 3729.283 |
| 444.9906 | 22.99133 | 22.928   | 23.02483 | 3  | 3 | 0 | 55897.57 | 165130.7 | 181783.7 |
| 327.5648 | 26.13592 | 26.12217 | 26.23333 | 4  | 1 | 3 | 40454.88 | 11585.75 | 25906.52 |
| 658.4478 | 34.71883 | 34.6085  | 34.74033 | 5  | 2 | 3 | 44614.57 | 236010.6 | 31155.25 |
| 752.8931 | 22.76842 | 22.73267 | 22.80117 | 4  | 1 | 3 | 69397.55 | 32008.06 | 64291.7  |
| 664.4303 | 38.0665  | 38.0225  | 38.1425  | 4  | 4 | 0 | 27581.54 | 116437.5 | 96027.35 |
| 1384.487 | 9.474117 | 9.43065  | 9.577883 | 5  | 1 | 4 | 4674204  | 1349600  | 2404492  |
| 711.506  | 42.95017 | 42.92583 | 42.99867 | 10 | 5 | 5 | 1272575  | 13736425 | 4033920  |
| 755.1296 | 9.537367 | 9.534967 | 9.560017 | 3  | 0 | 3 | 2659740  | 524718.7 | 916344.5 |
| 366.1354 | 25.31417 | 25.28633 | 25.327   | 3  | 0 | 3 | 812282.1 | 11917.48 | 12689.28 |
| 746.968  | 10.01907 | 9.9111   | 10.03047 | 6  | 2 | 4 | 545951   | 202527.6 | 332026.9 |
| 611.3899 | 24.51533 | 24.50683 | 24.54767 | 4  | 0 | 4 | 1276233  | 14606.74 | 9673.716 |
| 446.1194 | 37.43483 | 37.36567 | 37.50283 | 7  | 4 | 3 | 58128.97 | 521686.7 | 293012.2 |
| 668.2457 | 30.238   | 30.23533 | 30.24533 | 3  | 3 | 0 | 59030.21 | 190611.9 | 232101.1 |
| 558.3499 | 11.13852 | 11.1232  | 11.26877 | 3  | 0 | 3 | 193181.4 | 67014.07 | 79377.06 |
| 505.059  | 41.73483 | 41.58467 | 41.76183 | 7  | 5 | 2 | 25784.04 | 195450.6 | 153641.4 |
| 705.5736 | 11.60939 | 11.60367 | 11.62902 | 4  | 1 | 3 | 89928.33 | 41943.51 | 55357.99 |
| 284.0989 | 15.84883 | 15.81567 | 15.90678 | 4  | 1 | 3 | 33870.5  | 61903.52 | 94389.64 |
| 289.1802 | 33.2885  | 33.26167 | 33.28867 | 3  | 0 | 3 | 81120.03 | 334600.1 | 247066.6 |

|          |          |          |          |    |   |   |          |          |          |
|----------|----------|----------|----------|----|---|---|----------|----------|----------|
| 387.1429 | 41.193   | 41.178   | 41.23617 | 7  | 3 | 4 | 145198.7 | 159025.3 | 170183.3 |
| 503.9347 | 18.155   | 18.10567 | 18.22    | 5  | 1 | 4 | 92005.49 | 308053.3 | 428225.9 |
| 518.3381 | 24.38808 | 24.37383 | 24.66167 | 4  | 0 | 3 | 3622459  | 153316.1 | 36486.14 |
| 311.5417 | 30.41683 | 30.34733 | 30.4565  | 7  | 3 | 4 | 42617.6  | 80992.84 | 77403.03 |
| 448.0354 | 32.20817 | 32.107   | 32.2365  | 3  | 0 | 3 | 91654.68 | 102442.6 | 229068.5 |
| 452.9796 | 17.14817 | 17.08033 | 17.1685  | 5  | 1 | 4 | 71449.91 | 111437.1 | 219242.8 |
| 650.466  | 43.61275 | 43.57267 | 43.64917 | 4  | 1 | 3 | 31779.81 | 35525.36 | 37096.32 |
| 305.6287 | 29.20683 | 29.18517 | 29.286   | 6  | 5 | 1 | 100062   | 335355.5 | 327679.5 |
| 251.0707 | 27.44817 | 27.32817 | 27.472   | 5  | 2 | 3 | 51189.24 | 198704.3 | 132570   |
| 201.0467 | 16.19033 | 16.16553 | 16.2049  | 7  | 2 | 5 | 231862.7 | 1698312  | 1534946  |
| 294.215  | 29.52367 | 29.477   | 29.53883 | 5  | 0 | 5 | 258459.4 | 669194.7 | 638057.5 |
| 503.2677 | 44.00667 | 43.98483 | 44.04317 | 5  | 1 | 4 | 39386.69 | 116617.3 | 24554.42 |
| 848.5162 | 9.982717 | 9.924317 | 9.991583 | 3  | 0 | 3 | 373898.4 | 112763.6 | 176910.1 |
| 438.2393 | 12.27682 | 12.25707 | 12.39008 | 4  | 0 | 4 | 15282463 | 84483.03 | 60953.62 |
| 540.0474 | 30.77708 | 30.74683 | 30.82083 | 4  | 0 | 4 | 61486.4  | 105822   | 228274.1 |
| 1045.233 | 9.482133 | 9.444983 | 9.599283 | 6  | 3 | 3 | 20702920 | 8352070  | 14959433 |
| 634.2708 | 32.087   | 32.05883 | 32.1315  | 5  | 5 | 0 | 237375.3 | 1199154  | 1321310  |
| 539.3845 | 42.49317 | 42.46683 | 42.5495  | 10 | 5 | 5 | 92900.56 | 785029.9 | 116896.4 |
| 379.2217 | 17.24925 | 17.225   | 17.25317 | 4  | 0 | 4 | 1563747  | 58053.88 | 31884.45 |
| 276.2042 | 35.616   | 35.574   | 35.666   | 4  | 0 | 4 | 132123.1 | 455549.1 | 86839.86 |
| 558.4732 | 33.71692 | 33.6795  | 33.82533 | 10 | 5 | 5 | 124478.8 | 493523.4 | 290927.3 |
| 502.3482 | 32.40933 | 32.34217 | 32.44333 | 7  | 2 | 5 | 162273.2 | 1114126  | 556566.7 |
| 508.9415 | 32.11825 | 32.07267 | 32.146   | 4  | 1 | 3 | 78379.05 | 48410.43 | 108249   |
| 307.119  | 30.828   | 30.71867 | 30.86367 | 4  | 1 | 3 | 98297.77 | 47588.41 | 96904.39 |
| 405.3118 | 15.49358 | 15.4711  | 15.51292 | 6  | 2 | 4 | 58585.3  | 128410.6 | 135522.4 |
| 162.9737 | 3.963658 | 3.78935  | 4.054217 | 4  | 3 | 1 | 396388   | 3724115  | 4281763  |
| 532.3851 | 29.98208 | 29.951   | 29.992   | 10 | 5 | 5 | 1705277  | 17685120 | 3533682  |
| 720.7834 | 10.66703 | 10.61858 | 10.77118 | 6  | 1 | 5 | 215330.4 | 191910.7 | 302711.2 |
| 487.084  | 32.15042 | 32.10233 | 32.21717 | 4  | 1 | 3 | 36094.5  | 42185.91 | 76522.2  |
| 350.2234 | 17.56633 | 17.5605  | 17.57467 | 3  | 0 | 3 | 2379348  | 308976.5 | 114180.5 |
| 609.0329 | 10.00425 | 9.9505   | 10.04445 | 5  | 3 | 2 | 436559.6 | 161431.6 | 222433.6 |
| 487.1884 | 19.95667 | 19.95417 | 20.05783 | 3  | 0 | 3 | 520509.3 | 65846.07 | 27347.68 |
| 440.9953 | 22.96783 | 22.943   | 23.02483 | 5  | 5 | 0 | 169536   | 648464.3 | 601110   |
| 312.0299 | 29.19475 | 29.17833 | 29.2705  | 6  | 1 | 5 | 92438.62 | 244995.6 | 424321.1 |
| 345.2402 | 35.042   | 35.02583 | 35.08833 | 3  | 0 | 3 | 97769.34 | 223136.5 | 88414.41 |
| 535.2439 | 23.58533 | 23.56067 | 23.6005  | 4  | 0 | 4 | 1652251  | 11611.97 | 6528.468 |
| 290.6282 | 29.23517 | 29.19917 | 29.31467 | 6  | 2 | 4 | 282774.2 | 513487.3 | 1019556  |
| 362.9837 | 18.15242 | 18.10567 | 18.19067 | 6  | 2 | 4 | 237945   | 596795.2 | 891113.2 |
| 456.2944 | 21.3145  | 21.18233 | 21.3215  | 3  | 0 | 3 | 58064.64 | 27914.36 | 5501.829 |
| 442.2493 | 21.43067 | 21.37017 | 21.46383 | 3  | 0 | 3 | 75924.55 | 46904.06 | 33343.3  |
| 550.328  | 23.34425 | 23.3375  | 23.369   | 4  | 0 | 4 | 2903430  | 263443.5 | 139557.4 |
| 1387.489 | 9.4622   | 9.416233 | 9.537367 | 4  | 1 | 3 | 10491251 | 2984663  | 4664596  |
| 1048.233 | 9.455275 | 9.43065  | 9.537367 | 4  | 1 | 3 | 18190100 | 6730663  | 8857544  |
| 653.2969 | 29.111   | 29.09717 | 29.1395  | 5  | 5 | 0 | 100989   | 283648.2 | 307653.1 |
| 591.263  | 30.94733 | 30.922   | 31.06583 | 7  | 5 | 2 | 183042.8 | 941170.1 | 822195.5 |
| 340.1058 | 32.13617 | 32.07333 | 32.19133 | 3  | 0 | 3 | 86448.99 | 117468   | 242747.7 |
| 333.3194 | 37.04267 | 36.93267 | 37.14033 | 4  | 0 | 4 | 231556.5 | 171014.5 | 126468.6 |

|          |          |          |          |    |   |   |          |          |          |
|----------|----------|----------|----------|----|---|---|----------|----------|----------|
| 264.8729 | 2.109508 | 2.004783 | 2.26245  | 4  | 0 | 4 | 261927.3 | 0        | 0        |
| 684.5211 | 38.77433 | 38.76517 | 38.78    | 3  | 0 | 3 | 31609.41 | 16972.2  | 6666.769 |
| 472.1711 | 33.134   | 33.10517 | 33.1865  | 4  | 0 | 4 | 188135.7 | 190622.4 | 119746.7 |
| 441.2323 | 10.66594 | 10.58428 | 10.75237 | 10 | 5 | 5 | 10942902 | 17198879 | 27734707 |
| 415.2334 | 23.1955  | 23.08917 | 23.196   | 5  | 3 | 2 | 9654633  | 3501893  | 4348475  |
| 830.55   | 31.55667 | 31.542   | 31.586   | 6  | 3 | 3 | 73775.68 | 222065.8 | 184995.1 |
| 456.25   | 9.866317 | 9.845267 | 9.869583 | 3  | 0 | 3 | 455790.1 | 450871.4 | 622853.7 |
| 910.462  | 32.07183 | 32.05883 | 32.10267 | 3  | 3 | 0 | 67070.98 | 292607.8 | 361885.4 |
| 300.6448 | 30.90725 | 30.80183 | 30.95983 | 10 | 5 | 5 | 649291.4 | 1793754  | 3172751  |
| 544.3046 | 20.01958 | 20.00517 | 20.0975  | 4  | 3 | 1 | 45509.99 | 135196.6 | 87649.77 |
| 368.2339 | 12.99368 | 12.9347  | 13.06838 | 3  | 0 | 3 | 4133082  | 285762.2 | 283216.3 |
| 585.273  | 32.05883 | 32.05683 | 32.10267 | 3  | 3 | 0 | 88135.13 | 506988.4 | 569461.2 |
| 218.8674 | 2.229775 | 2.045917 | 2.4681   | 4  | 0 | 3 | 144634.9 | 0        | 0        |
| 318.064  | 28.05833 | 28.02967 | 28.176   | 3  | 0 | 3 | 31381.86 | 19218.33 | 29365.88 |
| 330.5008 | 28.21825 | 28.14683 | 28.26817 | 4  | 0 | 4 | 186484.2 | 479722   | 203776.3 |
| 498.3649 | 8.894167 | 8.7127   | 8.9755   | 7  | 5 | 2 | 2153199  | 5557524  | 4370876  |
| 920.5985 | 43.58875 | 43.563   | 43.602   | 8  | 3 | 5 | 289202.3 | 995191.4 | 1248152  |
| 576.369  | 8.767808 | 8.551733 | 8.85675  | 4  | 3 | 1 | 64474.86 | 162206   | 192678.7 |
| 402.7926 | 34.05633 | 34.0315  | 34.083   | 6  | 2 | 4 | 53254.07 | 41047.02 | 46431.31 |
| 542.0421 | 30.777   | 30.74683 | 30.7775  | 3  | 0 | 3 | 38295.57 | 30247.15 | 67634.68 |
| 1385.987 | 9.515    | 9.3803   | 9.64025  | 9  | 4 | 4 | 71058184 | 20774003 | 36316952 |
| 422.5611 | 29.24267 | 29.2275  | 29.3435  | 5  | 1 | 4 | 123955.8 | 103370.2 | 220913.4 |
| 454.4561 | 9.20005  | 9.048233 | 9.322017 | 7  | 2 | 4 | 3118812  | 2648386  | 2139326  |
| 203.1645 | 22.09    | 22.00767 | 22.12217 | 6  | 2 | 4 | 143126.4 | 241025   | 249117   |
| 664.1961 | 26.40683 | 26.36383 | 26.42867 | 3  | 0 | 3 | 76727.18 | 4206.514 | 3461.671 |
| 368.2254 | 17.52083 | 17.51667 | 17.529   | 3  | 0 | 3 | 177255.4 | 113684.2 | 54388.83 |
| 512.0189 | 22.99308 | 22.97683 | 23.01883 | 4  | 1 | 3 | 135650.3 | 62415.62 | 87516.33 |
| 652.2948 | 24.38867 | 24.34267 | 24.40483 | 3  | 0 | 3 | 54469.91 | 6761.692 | 4002.183 |
| 551.0782 | 31.32883 | 31.301   | 31.34333 | 3  | 0 | 3 | 175743.5 | 4752     | 4387.886 |
| 524.3349 | 32.59317 | 32.5745  | 32.66733 | 4  | 3 | 1 | 72631.38 | 392021   | 293997.2 |
| 364.1577 | 25.50492 | 25.40633 | 25.52567 | 6  | 1 | 5 | 148048.8 | 437667.1 | 218205.5 |
| 848.6589 | 39.243   | 39.12383 | 39.294   | 6  | 1 | 5 | 289371.3 | 44318.7  | 64403.67 |
| 514.317  | 23.19433 | 23.09983 | 23.22467 | 9  | 5 | 4 | 91932.16 | 522024.9 | 334813.7 |
| 376.1213 | 27.22633 | 27.186   | 27.30167 | 5  | 1 | 4 | 25733.28 | 32934.74 | 47039.02 |
| 283.0486 | 14.20512 | 14.13205 | 14.2452  | 3  | 0 | 3 | 40255.32 | 56510.17 | 47673.94 |
| 333.1022 | 22.12717 | 22.04383 | 22.15067 | 5  | 2 | 3 | 112245.5 | 119208.6 | 160008.3 |
| 185.0517 | 20.773   | 20.7305  | 20.78783 | 7  | 2 | 5 | 145772.5 | 297758.4 | 178402.3 |
| 547.0017 | 38.13875 | 38.1085  | 38.21533 | 6  | 1 | 5 | 135033.7 | 153961.6 | 328652.7 |
| 551.3312 | 23.344   | 23.3375  | 23.35433 | 3  | 0 | 3 | 947427.4 | 49890.61 | 21377.42 |
| 367.1895 | 38.12117 | 38.08367 | 38.21533 | 8  | 3 | 5 | 151471.3 | 606909.6 | 562657.4 |
| 472.3355 | 29.999   | 29.97167 | 30.10267 | 9  | 4 | 5 | 55460.32 | 376456.6 | 76108.94 |
| 515.1368 | 23.17692 | 23.10367 | 23.20917 | 10 | 5 | 5 | 2039539  | 5091977  | 8395926  |
| 459.0275 | 29.257   | 29.21333 | 29.32917 | 5  | 1 | 4 | 151953.1 | 148939.1 | 331115.2 |
| 668.4827 | 43.2015  | 43.1835  | 43.21983 | 10 | 5 | 5 | 658038.3 | 8836660  | 2511601  |
| 445.0831 | 18.11917 | 18.08867 | 18.155   | 4  | 1 | 3 | 87341.05 | 327567.8 | 223016.7 |
| 509.3207 | 22.47083 | 22.4575  | 22.5025  | 3  | 0 | 3 | 372574.3 | 46105.79 | 21288.34 |
| 388.254  | 8.7936   | 8.533633 | 8.8189   | 3  | 3 | 0 | 208312.1 | 1064229  | 1038436  |

|          |          |          |          |    |   |   |          |          |          |
|----------|----------|----------|----------|----|---|---|----------|----------|----------|
| 481.817  | 2.100092 | 2.08055  | 2.316883 | 4  | 1 | 3 | 1118396  | 131523.3 | 294095   |
| 550.2773 | 28.48908 | 28.43983 | 28.52317 | 4  | 1 | 3 | 40178.2  | 127646.6 | 38853.95 |
| 470.3641 | 44.47483 | 44.44017 | 44.54117 | 9  | 5 | 4 | 77167.74 | 872700   | 132776.5 |
| 483.1686 | 18.9225  | 18.8935  | 18.92333 | 3  | 0 | 3 | 175114.3 | 291150.9 | 425539.6 |
| 575.0329 | 43.4695  | 43.4555  | 43.64533 | 3  | 0 | 3 | 225385.8 | 203994.6 | 346167.9 |
| 316.0639 | 26.30525 | 26.22433 | 26.3655  | 6  | 1 | 4 | 59368.26 | 50910.4  | 90787.66 |
| 465.1279 | 37.4255  | 37.38067 | 37.47667 | 9  | 5 | 4 | 109349.5 | 911744.5 | 414102.3 |
| 403.1798 | 31.32192 | 31.31433 | 31.33233 | 4  | 0 | 4 | 66927.75 | 144859.8 | 61804.87 |
| 401.1643 | 20.97783 | 20.94567 | 21.03617 | 4  | 4 | 0 | 117695.8 | 827247.5 | 384272.8 |
| 324.2075 | 12.52312 | 12.42927 | 12.58605 | 3  | 0 | 3 | 190264.3 | 138975.1 | 49433.57 |
| 505.2352 | 21.64283 | 21.513   | 21.66917 | 3  | 0 | 3 | 71975.46 | 19627.2  | 6823.496 |
| 681.5199 | 9.526183 | 9.459367 | 9.596683 | 8  | 5 | 3 | 6.31E+08 | 1.06E+09 | 1.02E+09 |
| 746.2286 | 41.20067 | 41.16317 | 41.27983 | 6  | 5 | 1 | 137318.6 | 513651.2 | 552103.1 |
| 414.0306 | 25.67917 | 25.64683 | 25.7215  | 8  | 3 | 5 | 3425371  | 8488732  | 18519471 |
| 710.3661 | 8.725467 | 8.497367 | 8.766417 | 3  | 3 | 0 | 380059.5 | 456136.3 | 558460.9 |
| 818.4543 | 34.85817 | 34.82517 | 34.9395  | 3  | 3 | 0 | 25701.89 | 85289.39 | 48976.38 |
| 428.2701 | 27.069   | 27.0585  | 27.08883 | 4  | 0 | 4 | 1227147  | 74668.08 | 61636.74 |
| 702.5371 | 37.06383 | 37.04317 | 37.173   | 5  | 2 | 3 | 831194.8 | 1363278  | 937231.3 |
| 926.5899 | 43.58717 | 43.573   | 43.63033 | 5  | 2 | 3 | 65153.58 | 190132.3 | 144979.8 |
| 424.2236 | 13.62485 | 13.56747 | 13.642   | 3  | 0 | 3 | 443812.3 | 439165.8 | 578693.6 |
| 329.3248 | 41.85308 | 41.81767 | 41.91867 | 6  | 3 | 3 | 75149.21 | 360691.5 | 337947.4 |
| 412.815  | 9.748967 | 9.63195  | 9.77715  | 5  | 2 | 3 | 872417.1 | 145821.5 | 193142.2 |
| 475.1267 | 19.8525  | 19.83067 | 19.939   | 3  | 0 | 3 | 354030.2 | 12838.97 | 18758.02 |
| 277.6125 | 28.3975  | 28.35217 | 28.50817 | 6  | 2 | 4 | 51641.89 | 37031.8  | 52098.1  |
| 624.3293 | 16.93083 | 16.9215  | 16.94717 | 3  | 0 | 3 | 399025.1 | 21396.43 | 8638.38  |
| 481.8711 | 42.545   | 42.47767 | 42.59017 | 3  | 0 | 3 | 356853.1 | 81015.53 | 92332.39 |
| 289.6315 | 29.14467 | 29.08283 | 29.2115  | 6  | 2 | 4 | 73817.15 | 139146.2 | 240570.6 |
| 920.6895 | 44.46967 | 44.45517 | 44.537   | 10 | 5 | 5 | 1623154  | 13639021 | 6494043  |
| 599.231  | 26.9065  | 26.89817 | 26.922   | 3  | 0 | 3 | 109870.8 | 16498.6  | 16247.1  |
| 289.1147 | 20.773   | 20.7305  | 20.78767 | 7  | 2 | 5 | 106748   | 102182.2 | 104605.1 |
| 419.1352 | 28.13233 | 28.05933 | 28.16133 | 5  | 2 | 3 | 56739.27 | 83458.04 | 102653.7 |
| 417.1907 | 29.33083 | 29.32783 | 29.34667 | 3  | 0 | 3 | 370920.6 | 111421.5 | 46153.29 |
| 538.3554 | 26.42033 | 26.10283 | 26.45817 | 5  | 0 | 4 | 2489314  | 10302.11 | 6443.673 |
| 618.4682 | 13.86532 | 13.76062 | 13.93213 | 8  | 4 | 4 | 201801.1 | 563839.4 | 554656.1 |
| 610.9399 | 22.99008 | 22.9685  | 23.01883 | 4  | 1 | 3 | 221191.3 | 137287.7 | 220837.6 |
| 625.3692 | 21.586   | 21.513   | 21.62517 | 3  | 0 | 3 | 364238.3 | 25621.72 | 7841.735 |
| 377.1783 | 38.09867 | 38.08417 | 38.11483 | 3  | 3 | 0 | 52776.82 | 306257.4 | 208963.5 |
| 784.5795 | 43.2345  | 43.21833 | 43.26283 | 5  | 2 | 3 | 34363.5  | 269565.3 | 87263.95 |
| 321.1793 | 23.75133 | 23.74617 | 23.7695  | 3  | 0 | 3 | 519503.2 | 174221.6 | 153751.9 |
| 642.2296 | 29.20683 | 29.19983 | 29.23017 | 4  | 4 | 0 | 104240.2 | 480434.1 | 397952   |
| 318.7921 | 2.114383 | 2.08055  | 2.16115  | 3  | 0 | 3 | 424597.2 | 0        | 0        |
| 350.2028 | 20.75867 | 20.7015  | 20.77333 | 7  | 2 | 5 | 116317.8 | 253173.1 | 94099.75 |
| 459.2    | 11.0085  | 10.97327 | 11.1665  | 9  | 4 | 5 | 148360.8 | 280444.1 | 308231.9 |
| 378.2544 | 26.56017 | 26.556   | 26.58533 | 3  | 0 | 3 | 300617.6 | 52946.32 | 68457.82 |
| 610.4432 | 43.60225 | 43.5575  | 43.64917 | 8  | 2 | 5 | 83080.49 | 219582.6 | 70149.98 |
| 1157.796 | 43.60117 | 43.58783 | 43.64517 | 5  | 2 | 3 | 58259.01 | 94006.38 | 168787.9 |
| 298.1332 | 25.68275 | 25.59917 | 25.7215  | 8  | 5 | 3 | 96095.4  | 366130.8 | 397471.1 |

|          |          |          |          |    |   |   |          |          |          |
|----------|----------|----------|----------|----|---|---|----------|----------|----------|
| 333.0679 | 37.0065  | 36.99267 | 37.03517 | 3  | 0 | 3 | 123914.6 | 2623.181 | 5865.611 |
| 432.0327 | 32.12658 | 32.0875  | 32.18783 | 4  | 1 | 3 | 79153.27 | 31015.14 | 66036.87 |
| 514.8919 | 44.16958 | 44.12483 | 44.21283 | 6  | 3 | 3 | 60935.26 | 598807.9 | 126105.8 |
| 387.2303 | 32.09025 | 32.04317 | 32.11683 | 4  | 0 | 4 | 151481.1 | 240835.6 | 187020.9 |
| 277.8106 | 30.85433 | 30.73283 | 30.88867 | 10 | 5 | 5 | 289540.5 | 1127262  | 1000971  |
| 395.1643 | 36.99142 | 36.97617 | 37.00783 | 4  | 0 | 4 | 975982.3 | 155234.2 | 82140.02 |
| 635.2662 | 26.40683 | 26.36383 | 26.4725  | 3  | 0 | 3 | 145680.3 | 32659.37 | 17297.43 |
| 351.2363 | 17.54583 | 17.38367 | 17.57467 | 5  | 1 | 4 | 555901.8 | 86114.12 | 9402.548 |
| 283.9969 | 9.540167 | 9.444983 | 9.64025  | 8  | 4 | 3 | 1276465  | 3701140  | 2683990  |
| 338.2414 | 25.77875 | 25.76133 | 25.801   | 4  | 0 | 4 | 90431.34 | 135578.5 | 61384.02 |
| 348.2075 | 21.473   | 21.37017 | 21.49317 | 3  | 0 | 3 | 1376970  | 612819.2 | 304509.8 |
| 389.0032 | 18.148   | 18.11817 | 18.19983 | 4  | 1 | 3 | 58792.64 | 96885.44 | 101140.6 |
| 1047.233 | 9.482133 | 9.43065  | 9.5558   | 6  | 3 | 3 | 1.38E+08 | 49489023 | 83203965 |
| 509.0561 | 26.01842 | 25.99217 | 26.0485  | 4  | 0 | 4 | 33509.29 | 31301.05 | 53806.96 |
| 693.4996 | 38.8755  | 38.85333 | 38.927   | 3  | 0 | 3 | 52295.72 | 11570.72 | 10027.87 |
| 519.3428 | 24.40133 | 24.37383 | 24.67683 | 5  | 0 | 4 | 1289312  | 72312.14 | 39226.7  |
| 378.1087 | 28.13217 | 28.05933 | 28.16133 | 5  | 2 | 3 | 89451.21 | 150400.5 | 203502.7 |
| 744.191  | 29.22075 | 29.16983 | 29.32917 | 8  | 3 | 5 | 1842437  | 4321439  | 7799969  |
| 563.8346 | 18.19017 | 18.18233 | 18.21483 | 3  | 0 | 3 | 43902.06 | 67701.15 | 102801.1 |
| 713.3491 | 31.3185  | 31.31433 | 31.32933 | 3  | 0 | 3 | 72857.73 | 6198.103 | 7130.589 |
| 610.3958 | 23.66267 | 23.6485  | 23.7235  | 5  | 2 | 3 | 118385.5 | 83191.06 | 102278.2 |
| 459.059  | 19.43283 | 19.316   | 19.43767 | 4  | 1 | 3 | 71490.08 | 21417.05 | 34103.78 |
| 720.1911 | 29.12633 | 29.08283 | 29.2115  | 7  | 2 | 5 | 533425.8 | 1441833  | 2395165  |
| 886.1274 | 29.14717 | 29.10367 | 29.22633 | 6  | 1 | 5 | 98061.73 | 168985.4 | 317272.6 |
| 734.0209 | 42.82975 | 42.79333 | 42.86617 | 10 | 5 | 5 | 648205.3 | 5930369  | 1809574  |
| 525.1389 | 41.27983 | 41.223   | 41.50217 | 3  | 0 | 3 | 172529.7 | 423614.2 | 265225.3 |
| 478.326  | 12.20198 | 12.15812 | 12.23855 | 7  | 3 | 4 | 62270.09 | 116978   | 93104.23 |
| 498.2966 | 12.10555 | 12.07067 | 12.22863 | 3  | 0 | 3 | 988990.9 | 28650.96 | 13335.08 |
| 263.0801 | 10.73325 | 10.55748 | 10.77893 | 3  | 0 | 3 | 193780.7 | 123736   | 75107.16 |
| 438.3697 | 12.7426  | 12.69693 | 12.85362 | 9  | 4 | 5 | 175351.3 | 234342.9 | 257653.7 |
| 276.1353 | 31.0085  | 30.96417 | 31.07383 | 7  | 2 | 5 | 235837   | 602983.9 | 905265.1 |
| 611.2785 | 9.548692 | 9.534967 | 9.626317 | 4  | 1 | 3 | 2613905  | 659077.1 | 973533.4 |
| 345.1176 | 19.97067 | 19.9635  | 20.09133 | 4  | 0 | 4 | 2112408  | 36680.87 | 22225.53 |
| 621.3203 | 8.711883 | 8.497367 | 8.794383 | 5  | 4 | 0 | 229181.4 | 409055.1 | 486863.1 |
| 1022.759 | 33.22183 | 33.18917 | 33.2765  | 4  | 1 | 3 | 100227.9 | 454704.2 | 574392.9 |
| 262.0732 | 21.779   | 21.75667 | 21.78433 | 3  | 0 | 3 | 69457.84 | 122947.3 | 61344.07 |
| 485.1832 | 27.14667 | 27.142   | 27.1805  | 3  | 0 | 3 | 122354   | 58223    | 33318.44 |
| 624.3656 | 21.586   | 21.4985  | 21.6105  | 3  | 0 | 3 | 1073360  | 159637.2 | 102767   |
| 532.7617 | 26.42033 | 26.36383 | 26.44317 | 3  | 0 | 3 | 163904.8 | 9535.26  | 4456.814 |
| 429.2733 | 27.07883 | 27.07317 | 27.08883 | 3  | 0 | 3 | 375576.1 | 15756.21 | 11370.63 |
| 474.9283 | 22.13625 | 22.09383 | 22.20633 | 4  | 0 | 4 | 94356.62 | 275556.7 | 469420.6 |
| 331.5959 | 29.80517 | 29.78167 | 29.88483 | 5  | 1 | 4 | 116275   | 220312.3 | 465330.2 |
| 496.3643 | 15.68955 | 15.5742  | 15.69923 | 5  | 1 | 4 | 59447.37 | 138928.9 | 125581.5 |
| 574.2357 | 24.85917 | 24.853   | 24.88917 | 3  | 0 | 3 | 480300.9 | 11988.91 | 14728.16 |
| 286.2249 | 38.90575 | 38.88283 | 38.92717 | 4  | 0 | 4 | 58341.53 | 176381   | 47010.11 |
| 683.643  | 9.526183 | 9.473767 | 9.596683 | 8  | 5 | 3 | 10494681 | 18063703 | 15470440 |
| 387.0784 | 30.48833 | 30.38217 | 30.51183 | 5  | 3 | 2 | 644861.1 | 3015727  | 3226418  |

|          |          |          |          |    |   |   |          |          |          |
|----------|----------|----------|----------|----|---|---|----------|----------|----------|
| 620.438  | 29.91892 | 29.89017 | 29.9285  | 10 | 5 | 5 | 2545462  | 25838814 | 4987790  |
| 631.2782 | 32.08725 | 32.05883 | 32.14633 | 4  | 4 | 0 | 186743.3 | 963625.1 | 1117021  |
| 281.6336 | 29.80333 | 29.76467 | 29.88483 | 7  | 2 | 5 | 386074   | 983416.9 | 1827971  |
| 790.6173 | 37.39983 | 37.38033 | 37.50283 | 5  | 0 | 5 | 236874.6 | 308208.3 | 106361.4 |
| 483.3177 | 9.15355  | 8.817733 | 9.236417 | 5  | 2 | 3 | 2343883  | 622410.8 | 476435.2 |
| 282.1353 | 29.8005  | 29.79033 | 29.91383 | 6  | 2 | 4 | 93490.84 | 183803.6 | 347329   |
| 535.3363 | 24.22833 | 24.16583 | 24.34483 | 5  | 2 | 3 | 232555.9 | 92319.04 | 96057.72 |
| 904.695  | 40.942   | 40.92133 | 40.95333 | 6  | 1 | 5 | 2683361  | 1065291  | 972990.1 |
| 271.0268 | 10.97963 | 10.83542 | 11.0617  | 3  | 0 | 3 | 127798.7 | 114418.9 | 176611.6 |
| 278.08   | 30.84967 | 30.73283 | 30.87583 | 9  | 5 | 4 | 122125.5 | 429017.5 | 417376.8 |
| 376.9514 | 30.78433 | 30.73283 | 30.83517 | 4  | 0 | 4 | 46650.39 | 113121.9 | 119586.9 |
| 316.6289 | 29.1255  | 29.111   | 29.163   | 5  | 4 | 1 | 79808.12 | 287605.2 | 273273.1 |
| 657.237  | 30.80633 | 30.474   | 30.861   | 7  | 2 | 4 | 1090278  | 1839696  | 3761103  |
| 430.2864 | 24.58308 | 24.5795  | 24.59133 | 4  | 0 | 4 | 2025540  | 93584.42 | 40281.94 |
| 414.1998 | 23.18817 | 23.17283 | 23.21    | 6  | 2 | 4 | 64086.87 | 227736.7 | 122940.6 |
| 621.444  | 8.7393   | 8.51555  | 8.76595  | 3  | 3 | 0 | 471346.3 | 625689.4 | 799643.4 |
| 257.9715 | 22.80408 | 22.76083 | 22.85067 | 10 | 5 | 5 | 1648834  | 3486086  | 3717404  |
| 1047.734 | 9.4622   | 9.3803   | 9.537367 | 6  | 3 | 3 | 50266404 | 19724974 | 32625451 |
| 689.9946 | 43.06933 | 43.034   | 43.10017 | 10 | 5 | 5 | 1276025  | 16512335 | 5045718  |
| 394.3344 | 18.92383 | 18.849   | 18.96767 | 3  | 0 | 3 | 13436735 | 51533716 | 49224068 |
| 599.3815 | 9.909908 | 9.895317 | 9.946383 | 4  | 1 | 3 | 345744.1 | 252257   | 255638.4 |
| 333.3916 | 37.05025 | 36.87067 | 37.06767 | 4  | 0 | 3 | 132847   | 522.7448 | 1168.893 |
| 905.6982 | 40.94383 | 40.87517 | 40.9675  | 5  | 0 | 5 | 1349124  | 474538.5 | 465976.7 |
| 661.5055 | 9.514858 | 9.253383 | 9.804217 | 10 | 4 | 4 | 12044148 | 15473586 | 15738406 |
| 583.4686 | 32.49567 | 32.41583 | 32.52367 | 4  | 1 | 3 | 37848.32 | 30778.62 | 38900.44 |
| 1046.231 | 9.515    | 9.43065  | 9.584433 | 7  | 4 | 3 | 3.39E+08 | 1.24E+08 | 2.27E+08 |
| 279.1389 | 22.123   | 22.08617 | 22.14467 | 4  | 4 | 0 | 59882.46 | 183131.5 | 82638.7  |
| 1011.751 | 44.15917 | 44.11483 | 44.2395  | 7  | 3 | 4 | 63339.52 | 362003.2 | 207285.2 |
| 499.2248 | 19.985   | 19.97167 | 20.10783 | 3  | 0 | 3 | 1451498  | 57935.88 | 29815.44 |
| 340.394  | 42.47675 | 42.43917 | 42.60733 | 10 | 5 | 5 | 70825.41 | 554359.3 | 129876.4 |
| 680.5162 | 9.515    | 9.459367 | 9.596683 | 9  | 5 | 4 | 2.97E+09 | 4.96E+09 | 4.45E+09 |
| 335.2059 | 38.86817 | 38.83883 | 38.88283 | 3  | 0 | 3 | 189314.1 | 166913   | 43951.41 |
| 320.27   | 23.01883 | 22.97417 | 23.04967 | 5  | 1 | 4 | 57952.72 | 69369.17 | 138426.8 |
| 742.1958 | 29.228   | 29.19917 | 29.31467 | 7  | 2 | 5 | 202381   | 429710.2 | 765682.4 |
| 779.204  | 30.24533 | 30.22083 | 30.33617 | 5  | 3 | 2 | 53573.07 | 183928.4 | 180928.2 |
| 693.2427 | 10.70767 | 10.70707 | 10.712   | 3  | 0 | 3 | 1106515  | 57798.11 | 75280.59 |
| 439.2426 | 12.2627  | 12.24235 | 12.39008 | 4  | 0 | 4 | 4272432  | 50325.07 | 34420.27 |
| 385.3312 | 43.993   | 43.92083 | 44.0145  | 4  | 3 | 1 | 146857.7 | 706244.6 | 743377.1 |
| 933.6478 | 9.391017 | 9.101033 | 9.460417 | 6  | 2 | 4 | 25417462 | 5613838  | 7247262  |
| 1045.73  | 9.518825 | 9.43065  | 9.584433 | 8  | 5 | 3 | 2.65E+08 | 1.07E+08 | 1.83E+08 |
| 316.0636 | 28.1175  | 28.04433 | 28.16133 | 5  | 1 | 4 | 261041.7 | 492026.3 | 683537.8 |
| 652.2564 | 32.08075 | 32.05683 | 32.11667 | 4  | 4 | 0 | 170284.3 | 911862.9 | 1182827  |
| 362.0977 | 29.14467 | 29.1255  | 29.2115  | 6  | 1 | 5 | 235065.4 | 418289.8 | 855976.9 |
| 351.0575 | 3.972267 | 3.83525  | 4.042867 | 3  | 3 | 0 | 453108   | 7907657  | 10258715 |
| 1046.732 | 9.518825 | 9.43065  | 9.584433 | 8  | 5 | 3 | 2.42E+08 | 97154891 | 1.67E+08 |
| 461.8654 | 40.99983 | 40.98783 | 41.02817 | 3  | 0 | 3 | 265842   | 36029.14 | 25568.1  |
| 456.3451 | 12.1935  | 12.05465 | 12.39008 | 9  | 4 | 5 | 240979.6 | 576528.5 | 458306.8 |

|          |          |          |          |    |   |   |          |          |          |
|----------|----------|----------|----------|----|---|---|----------|----------|----------|
| 682.5243 | 9.546583 | 9.459367 | 9.596683 | 8  | 5 | 3 | 1.14E+08 | 1.04E+08 | 1.43E+08 |
| 258.6342 | 9.250667 | 9.101033 | 9.3081   | 5  | 4 | 1 | 1759520  | 3454256  | 3115457  |
| 318.2432 | 33.0405  | 32.97333 | 33.073   | 7  | 3 | 4 | 169289.1 | 1303981  | 669827.5 |
| 481.3391 | 9.799517 | 9.736067 | 9.848417 | 6  | 4 | 2 | 3171211  | 166150.5 | 69932.9  |
| 312.1353 | 29.12992 | 29.1255  | 29.2115  | 8  | 3 | 5 | 732223.3 | 1971265  | 3371772  |
| 617.4351 | 33.381   | 33.34    | 33.45267 | 7  | 4 | 3 | 282057.3 | 893636   | 881305.5 |
| 333.1751 | 10.01235 | 9.957467 | 10.05848 | 5  | 2 | 3 | 694779.6 | 234836.2 | 403035.5 |
| 333.4686 | 37.03783 | 36.93267 | 37.15533 | 3  | 0 | 3 | 54283.64 | 0        | 0        |
| 500.4012 | 29.5065  | 29.46233 | 29.54667 | 5  | 3 | 2 | 102018.9 | 114054.4 | 88593.01 |
| 343.175  | 13.82272 | 13.79633 | 13.98347 | 6  | 1 | 4 | 1188370  | 359643.4 | 358058.7 |
| 487.1296 | 37.8495  | 37.82733 | 37.93167 | 5  | 4 | 1 | 17240.56 | 70496.24 | 30130.99 |
| 677.3612 | 33.76533 | 33.7395  | 33.77733 | 3  | 0 | 3 | 33893.61 | 33208.16 | 27211.02 |
| 372.3116 | 28.22867 | 28.20033 | 28.24967 | 7  | 2 | 5 | 153284.9 | 943974.8 | 383038.7 |
| 1044.732 | 9.463983 | 9.43065  | 9.55075  | 5  | 2 | 3 | 13662828 | 4297941  | 7984951  |
| 484.1291 | 37.88917 | 37.8495  | 37.91883 | 10 | 5 | 5 | 87901.57 | 1107860  | 261368.4 |
| 425.3233 | 44.001   | 44       | 44.0145  | 3  | 3 | 0 | 100014.6 | 490926.6 | 546411.2 |
| 572.3127 | 12.63313 | 12.6302  | 12.73457 | 3  | 0 | 3 | 88071.63 | 16751.42 | 15475.57 |
| 497.1808 | 29.6365  | 29.57833 | 29.65167 | 7  | 2 | 5 | 118565.5 | 256276.4 | 402235.3 |
| 295.1492 | 31.01592 | 30.95017 | 31.07383 | 6  | 1 | 5 | 149479.2 | 354022.8 | 588654.4 |
| 516.1401 | 23.181   | 23.11833 | 23.20917 | 8  | 3 | 5 | 501046.7 | 1107943  | 1915911  |
| 362.1057 | 25.79883 | 25.72967 | 25.83017 | 5  | 1 | 4 | 175099.5 | 176314.2 | 351468   |
| 406.2855 | 31.4745  | 31.47167 | 31.5245  | 3  | 0 | 3 | 179305.7 | 108795.9 | 50001.05 |
| 279.0938 | 16.18315 | 16.14437 | 16.22193 | 10 | 5 | 5 | 4099297  | 7879691  | 5059012  |
| 727.5011 | 33.10567 | 33.04867 | 33.14283 | 6  | 3 | 3 | 73309.7  | 93133.26 | 112144.6 |
| 350.2232 | 21.253   | 21.1695  | 21.27833 | 4  | 0 | 4 | 6124667  | 208684   | 129520.9 |
| 562.2744 | 25.4315  | 25.37233 | 25.49633 | 4  | 0 | 4 | 393657.3 | 171316.4 | 64296.74 |
| 679.5133 | 9.515    | 9.459367 | 9.596683 | 9  | 5 | 4 | 7.47E+09 | 1.21E+10 | 1.1E+10  |
| 180.9515 | 3.801067 | 3.73085  | 4.024283 | 3  | 0 | 3 | 629177.6 | 288642.9 | 414136.8 |
| 396.1624 | 33.29142 | 33.25783 | 33.32083 | 6  | 2 | 4 | 183452.4 | 1302539  | 597146.2 |
| 336.8027 | 2.070625 | 2.032667 | 2.16115  | 4  | 0 | 4 | 246606   | 0        | 0        |
| 285.1862 | 10.70767 | 10.63273 | 10.75237 | 5  | 1 | 4 | 225799.5 | 495783.4 | 447374.2 |
| 708.4906 | 29.85583 | 29.82967 | 29.87017 | 10 | 5 | 5 | 2240124  | 21975880 | 4066627  |
| 585.1925 | 23.30442 | 23.26717 | 23.3685  | 6  | 1 | 5 | 78672.83 | 93672.7  | 204579.8 |
| 461.1777 | 24.26317 | 24.185   | 24.33283 | 5  | 5 | 0 | 87851.95 | 264409.8 | 297316.6 |
| 474.2852 | 23.128   | 23.09983 | 23.22367 | 6  | 4 | 2 | 44441.47 | 218092.1 | 142160.4 |
| 313.6924 | 8.930617 | 8.695117 | 8.96155  | 4  | 4 | 0 | 207015.8 | 281312.8 | 216713.3 |
| 348.5984 | 29.23517 | 29.19333 | 29.31467 | 6  | 1 | 5 | 151167.2 | 290250.1 | 610625.2 |
| 501.1761 | 29.64025 | 29.57833 | 29.71067 | 8  | 3 | 5 | 201728.2 | 497524.7 | 802376   |
| 768.9808 | 10.06338 | 9.93755  | 10.07255 | 5  | 1 | 4 | 612829.4 | 269474.2 | 424872.5 |
| 224.0633 | 31.553   | 31.47167 | 31.6325  | 5  | 3 | 2 | 57438.62 | 198181.5 | 128820.9 |
| 480.1576 | 37.42442 | 37.38067 | 37.47317 | 10 | 5 | 5 | 361430.3 | 2991485  | 1468068  |
| 651.3572 | 10.71447 | 10.67897 | 10.75237 | 4  | 1 | 3 | 907340.6 | 1461505  | 1513322  |
| 473.1351 | 10.66553 | 10.63755 | 10.77118 | 5  | 4 | 1 | 699641.6 | 1394542  | 1351095  |
| 474.2125 | 14.33282 | 14.33212 | 14.35518 | 3  | 0 | 3 | 469778.1 | 815884.3 | 1457839  |
| 471.1676 | 33.13367 | 33.09067 | 33.2025  | 4  | 0 | 4 | 750787.6 | 1012443  | 558429.6 |
| 923.6989 | 44.47233 | 44.40883 | 44.49933 | 6  | 3 | 3 | 47638.53 | 265015.7 | 166516.9 |
| 584.2697 | 32.10167 | 32.07183 | 32.19133 | 5  | 4 | 1 | 431889.1 | 2429224  | 2642965  |

|          |          |          |          |    |   |   |          |          |          |
|----------|----------|----------|----------|----|---|---|----------|----------|----------|
| 323.4929 | 25.2765  | 25.2255  | 25.351   | 8  | 5 | 3 | 220688.2 | 921564   | 1202713  |
| 339.0742 | 15.42778 | 15.39283 | 15.45395 | 3  | 0 | 3 | 38606.03 | 56859.27 | 31935.18 |
| 446.2543 | 23.17692 | 23.10367 | 23.21    | 10 | 5 | 5 | 260317.5 | 1201355  | 788771.9 |
| 723.2097 | 32.1315  | 31.94183 | 32.20817 | 7  | 3 | 4 | 633209.6 | 1279348  | 2734403  |
| 259.9672 | 22.81358 | 22.76083 | 22.85733 | 8  | 4 | 4 | 166072   | 277518.8 | 293462.4 |
| 517.9505 | 22.12183 | 22.10867 | 22.16383 | 4  | 0 | 4 | 123225.8 | 374240.4 | 616742.4 |
| 792.439  | 33.68133 | 33.64533 | 33.757   | 10 | 5 | 5 | 55642.84 | 310405.3 | 131543.8 |
| 453.2605 | 18.54583 | 18.52133 | 18.56483 | 10 | 5 | 5 | 92320.73 | 278163.3 | 194393.6 |
| 416.0515 | 23.598   | 23.51717 | 23.66217 | 4  | 1 | 3 | 24872.15 | 32738.68 | 35965.43 |
| 304.2276 | 26.53817 | 26.48717 | 26.5875  | 4  | 1 | 3 | 40111.23 | 282412.2 | 142671.3 |
| 1030.257 | 9.441208 | 9.416233 | 9.537367 | 4  | 1 | 3 | 3183364  | 918267.5 | 1342877  |
| 392.0362 | 22.11867 | 22.08617 | 22.12267 | 3  | 3 | 0 | 52335.28 | 212157.7 | 110382.3 |
| 454.2241 | 21.85833 | 21.78383 | 21.88833 | 3  | 0 | 3 | 162689.5 | 28395.36 | 20669.7  |
| 613.0668 | 23.19075 | 23.16617 | 23.20917 | 4  | 0 | 4 | 45085.61 | 77801.11 | 143386.2 |
| 554.8994 | 28.00933 | 27.927   | 28.10383 | 5  | 1 | 4 | 46151.26 | 77955.43 | 55338.12 |
| 415.2464 | 21.57592 | 21.484   | 21.59667 | 4  | 3 | 1 | 5357479  | 799702.9 | 1023952  |
| 659.4682 | 43.20367 | 43.1835  | 43.2345  | 10 | 5 | 5 | 174739.5 | 1998290  | 543688   |
| 1493.032 | 42.73017 | 42.70617 | 42.7805  | 3  | 0 | 3 | 36830.27 | 72380.41 | 79899.7  |
| 682.2697 | 30.23183 | 30.22083 | 30.2605  | 3  | 3 | 0 | 36476.44 | 94330.06 | 99958.09 |
| 511.015  | 22.98525 | 22.9685  | 23.01883 | 6  | 2 | 4 | 922846.6 | 440981.4 | 619821.1 |
| 355.1098 | 31.77267 | 31.72517 | 31.868   | 5  | 1 | 4 | 77168.3  | 452761.6 | 351888.5 |
| 413.1963 | 23.181   | 23.10367 | 23.20917 | 9  | 4 | 5 | 262394.2 | 847667.1 | 1073630  |
| 717.0373 | 29.64692 | 29.57833 | 29.66617 | 4  | 1 | 3 | 72781.44 | 101362.7 | 204238   |
| 638.0212 | 33.1865  | 33.11033 | 33.1875  | 4  | 0 | 4 | 67247.05 | 69546.22 | 106456.9 |
| 325.5959 | 31.00108 | 30.979   | 31.07383 | 6  | 1 | 5 | 557249.5 | 1124742  | 2471577  |
| 780.1974 | 30.2605  | 30.22083 | 30.29    | 5  | 3 | 2 | 63571.4  | 292698.2 | 260762.5 |
| 667.4807 | 11.89058 | 11.82627 | 11.91327 | 6  | 3 | 3 | 110841.9 | 146141.4 | 193183.6 |
| 467.3487 | 17.14667 | 17.13017 | 17.20933 | 4  | 3 | 1 | 27761.01 | 97960.37 | 50291.47 |
| 628.8563 | 10.39228 | 10.34782 | 10.41848 | 4  | 1 | 3 | 16478637 | 1394894  | 2402251  |
| 827.0049 | 9.946733 | 9.845267 | 10.01642 | 4  | 1 | 3 | 351405.9 | 76845.89 | 108433   |
| 488.1918 | 19.95667 | 19.95417 | 20.00717 | 3  | 0 | 3 | 117947.9 | 20397.07 | 11689.81 |
| 431.2892 | 24.586   | 24.58017 | 24.59133 | 3  | 0 | 3 | 568631.6 | 57176.58 | 55170.02 |
| 268.3003 | 37.35267 | 37.30567 | 37.51767 | 8  | 4 | 4 | 27025.61 | 121692.9 | 43971.83 |
| 228.2325 | 10.06529 | 9.876817 | 10.10067 | 6  | 3 | 2 | 282063.3 | 447147.5 | 476413.7 |
| 328.5728 | 28.429   | 28.37133 | 28.47817 | 5  | 1 | 4 | 143955.1 | 87346.49 | 173839.6 |
| 299.6336 | 28.50125 | 28.48367 | 28.58283 | 6  | 2 | 4 | 904889.8 | 2527353  | 3973140  |
| 656.1382 | 28.3805  | 28.35217 | 28.47817 | 5  | 2 | 3 | 148548.8 | 162281.3 | 225174   |
| 449.162  | 29.98375 | 29.8685  | 30.1055  | 4  | 1 | 3 | 374763.4 | 1965171  | 2252815  |
| 436.2701 | 19.81275 | 19.78683 | 19.939   | 8  | 5 | 3 | 861538.9 | 3263592  | 4090738  |
| 292.629  | 29.111   | 29.08117 | 29.11167 | 3  | 3 | 0 | 52022.8  | 177400.5 | 192887.8 |
| 276.8968 | 2.10335  | 2.054783 | 2.323083 | 8  | 5 | 3 | 251068   | 693358.4 | 156523.7 |
| 550.0748 | 31.32867 | 31.301   | 31.35767 | 3  | 0 | 3 | 718055.1 | 7665.007 | 2938.362 |
| 339.2525 | 9.349892 | 9.317883 | 9.547767 | 4  | 1 | 3 | 2221487  | 2723735  | 1280814  |
| 396.1753 | 25.82975 | 25.81917 | 25.8665  | 4  | 3 | 1 | 104280.1 | 480168   | 287628.6 |
| 416.9028 | 18.15242 | 18.01617 | 18.18483 | 6  | 2 | 4 | 263895   | 859501.8 | 1140772  |
| 555.2873 | 26.71133 | 26.70683 | 26.74017 | 3  | 0 | 3 | 319672.9 | 71721.87 | 42998.09 |
| 384.5822 | 8.78185  | 8.551733 | 8.85025  | 6  | 4 | 2 | 166665.4 | 367144.1 | 205247.6 |



|          |          |          |          |    |   |   |          |          |          |
|----------|----------|----------|----------|----|---|---|----------|----------|----------|
| 705.4768 | 9.4881   | 9.460417 | 9.5558   | 5  | 2 | 3 | 37482976 | 25997559 | 37439904 |
| 220.1992 | 22.1715  | 22.15883 | 22.18783 | 3  | 3 | 0 | 53734.7  | 176024.6 | 197648.3 |
| 341.1404 | 27.26708 | 27.186   | 27.28717 | 4  | 0 | 4 | 644364.8 | 47558    | 56918.4  |
| 722.2066 | 32.11892 | 32.059   | 32.20817 | 8  | 3 | 5 | 2030718  | 4525528  | 9091108  |
| 290.6102 | 28.4045  | 28.37133 | 28.46317 | 6  | 2 | 4 | 192080.8 | 226328.6 | 324689.1 |
| 519.1963 | 10.70763 | 10.4628  | 10.77118 | 4  | 1 | 3 | 512751.8 | 734953   | 836627.2 |
| 377.1052 | 26.30483 | 26.23333 | 26.34133 | 6  | 2 | 4 | 140496.8 | 210089.5 | 321282.3 |
| 462.9078 | 15.90678 | 15.84463 | 15.9394  | 5  | 1 | 4 | 168608.4 | 400335   | 784216.3 |
| 457.3382 | 8.767942 | 8.51555  | 8.8189   | 4  | 3 | 1 | 136291.6 | 476570.6 | 385667.6 |
| 446.5263 | 29.15083 | 29.12633 | 29.2115  | 4  | 0 | 4 | 87691.77 | 137148.8 | 297303.6 |
| 353.2423 | 19.27483 | 19.26017 | 19.30533 | 3  | 0 | 3 | 492019.7 | 87898.22 | 29166.46 |
| 412.0352 | 25.68033 | 25.64833 | 25.69883 | 6  | 1 | 5 | 384423.4 | 816379.3 | 1790197  |
| 849.018  | 9.991583 | 9.924317 | 9.992333 | 3  | 0 | 3 | 204208.3 | 126031.8 | 219860.9 |
| 444.9339 | 25.67642 | 25.66767 | 25.70383 | 6  | 1 | 5 | 143534.5 | 315885.9 | 692559   |
| 1180.73  | 9.899967 | 9.88085  | 9.91985  | 3  | 0 | 3 | 138274.2 | 77030.03 | 125306   |
| 773.5011 | 9.652592 | 9.188017 | 9.7372   | 10 | 3 | 4 | 12283450 | 2680248  | 3047625  |
| 630.2752 | 10.79328 | 10.7931  | 10.79782 | 3  | 0 | 3 | 423436.4 | 79172.63 | 129322.5 |
| 284.1291 | 26.23908 | 26.22317 | 26.31783 | 4  | 1 | 3 | 36483.14 | 51028.19 | 76940.51 |
| 378.228  | 28.53733 | 28.49317 | 28.59983 | 4  | 0 | 4 | 284825.1 | 1109094  | 355969.7 |
| 524.4467 | 34.44192 | 34.424   | 34.48167 | 8  | 3 | 5 | 384387.6 | 801477.3 | 813308.1 |
| 493.1466 | 30.95767 | 30.93717 | 31.07383 | 10 | 5 | 5 | 168213.7 | 1447253  | 650076.3 |
| 364.2386 | 24.00033 | 23.9735  | 24.02883 | 3  | 0 | 3 | 1645691  | 492173.3 | 141057.2 |
| 658.2405 | 30.79167 | 30.474   | 30.84967 | 6  | 1 | 4 | 374895   | 614482.7 | 1191597  |
| 278.6101 | 28.39517 | 28.36533 | 28.47817 | 7  | 2 | 5 | 917114.3 | 1453902  | 1997363  |
| 324.2253 | 19.01833 | 19.01117 | 19.02667 | 4  | 3 | 1 | 25976.23 | 128503.9 | 51673.93 |
| 310.192  | 14.90429 | 14.8622  | 14.92368 | 4  | 0 | 4 | 2203271  | 9669.577 | 8655.717 |
| 680.015  | 10.36217 | 10.1353  | 10.38373 | 8  | 3 | 5 | 12273537 | 17322505 | 21015832 |
| 395.1158 | 24.594   | 24.5795  | 24.61633 | 5  | 1 | 4 | 64578.04 | 104925   | 180192.3 |
| 673.2874 | 22.11533 | 22.1125  | 22.11583 | 3  | 3 | 0 | 122081.7 | 224195.5 | 285363.4 |
| 681.0705 | 8.7798   | 8.533633 | 8.808367 | 3  | 3 | 0 | 863315.1 | 1099633  | 1458489  |
| 709.4942 | 29.85917 | 29.82967 | 29.88483 | 10 | 5 | 5 | 893939.4 | 8077116  | 1644613  |
| 558.9183 | 43.88533 | 43.84967 | 43.946   | 10 | 5 | 5 | 180866.9 | 1513520  | 324270.1 |
| 617.1126 | 29.6515  | 29.593   | 29.695   | 5  | 1 | 4 | 58993.92 | 67972.79 | 137546.9 |
| 440.3319 | 28.23817 | 28.1175  | 28.3175  | 9  | 4 | 5 | 371682   | 1011302  | 406450.8 |
| 513.1415 | 23.181   | 23.1585  | 23.20917 | 5  | 1 | 4 | 88332.87 | 212447   | 350901.7 |
| 749.5836 | 12.39623 | 12.35018 | 12.50992 | 8  | 3 | 5 | 86641.1  | 174575.3 | 162046.1 |
| 362.7447 | 9.520758 | 9.4881   | 9.584433 | 4  | 3 | 1 | 2816470  | 4751536  | 4816275  |
| 310.0742 | 21.75667 | 21.6765  | 21.79333 | 5  | 0 | 5 | 127785.7 | 135516.2 | 166362.7 |
| 266.0928 | 12.74887 | 12.51493 | 12.85362 | 3  | 0 | 3 | 2093116  | 91610.13 | 51533.3  |
| 433.2606 | 23.1955  | 23.08917 | 23.196   | 3  | 3 | 0 | 88512.08 | 95783.17 | 77648.23 |
| 499.5651 | 30.9505  | 30.93717 | 31.07383 | 10 | 5 | 5 | 170733.6 | 1440646  | 649312   |
| 478.2708 | 21.2615  | 21.1695  | 21.2875  | 3  | 0 | 3 | 147834.4 | 265405.2 | 131187.3 |
| 537.3524 | 22.25817 | 22.21317 | 22.2965  | 3  | 0 | 3 | 490447   | 12885.42 | 14463.15 |
| 349.2254 | 27.52233 | 27.48933 | 27.547   | 5  | 3 | 2 | 363178.2 | 156900.3 | 154046.1 |
| 199.1696 | 25.609   | 25.56083 | 25.93383 | 7  | 3 | 3 | 188115.8 | 2377877  | 990972.9 |
| 267.211  | 33.17267 | 33.17183 | 33.2155  | 3  | 0 | 3 | 42786.48 | 306844.2 | 64499.47 |
| 1140.553 | 10.64958 | 10.599   | 10.77118 | 5  | 2 | 3 | 1192238  | 777876.9 | 649791.9 |

|          |          |          |          |    |   |   |          |          |          |
|----------|----------|----------|----------|----|---|---|----------|----------|----------|
| 212.151  | 9.2651   | 9.168467 | 9.44975  | 3  | 0 | 3 | 41591636 | 36614.77 | 49451.79 |
| 281.166  | 30.83517 | 30.73283 | 30.90333 | 9  | 5 | 4 | 668046.4 | 2806507  | 2142928  |
| 265.1087 | 25.31417 | 25.30067 | 25.327   | 3  | 0 | 3 | 196811.2 | 68391.38 | 20361.74 |
| 320.176  | 23.76358 | 23.736   | 23.7695  | 4  | 0 | 4 | 2492518  | 420616.8 | 110958.5 |
| 862.1267 | 29.23517 | 29.16333 | 29.3435  | 6  | 1 | 5 | 190604.8 | 362851.8 | 755615.8 |
| 589.2607 | 26.42033 | 26.36383 | 26.42867 | 3  | 0 | 3 | 100002.9 | 51000.02 | 37366.72 |
| 463.1312 | 37.42442 | 37.38067 | 37.47317 | 10 | 5 | 5 | 593994.6 | 5587697  | 2557330  |
| 614.4485 | 34.93642 | 34.89567 | 35.009   | 8  | 4 | 4 | 113892.2 | 1266705  | 408810.2 |
| 405.1231 | 25.39825 | 25.3875  | 25.63817 | 4  | 1 | 3 | 25967.58 | 22307.46 | 36039.75 |
| 324.1625 | 38.12883 | 38.09867 | 38.20067 | 8  | 3 | 5 | 498063.9 | 1435115  | 1339937  |
| 514.1989 | 10.39262 | 10.37652 | 10.52447 | 7  | 2 | 5 | 452910.4 | 349523.6 | 351928.5 |
| 588.2064 | 28.36417 | 28.34517 | 28.36683 | 3  | 3 | 0 | 68049.04 | 169774   | 211538.4 |
| 397.3038 | 34.11558 | 33.88533 | 34.148   | 8  | 3 | 5 | 799310.4 | 1202989  | 1271541  |
| 461.3636 | 40.97833 | 40.9675  | 40.985   | 4  | 0 | 4 | 545738.4 | 154560.5 | 125534.9 |
| 592.8651 | 25.66442 | 25.62383 | 25.68617 | 4  | 1 | 3 | 47043.91 | 62611.07 | 136239.9 |
| 563.2395 | 19.897   | 19.89267 | 20.00717 | 3  | 0 | 3 | 329598.3 | 16583.56 | 19523.5  |
| 757.0373 | 42.7135  | 42.68233 | 42.77283 | 9  | 4 | 5 | 71847.1  | 424366.8 | 149079.1 |
| 296.1468 | 30.0325  | 30.01333 | 30.11717 | 5  | 2 | 3 | 778796.8 | 2167008  | 3996027  |
| 586.2658 | 32.08008 | 32.07183 | 32.117   | 4  | 4 | 0 | 246278.4 | 1307096  | 1457688  |
| 434.3277 | 25.911   | 25.8365  | 25.94617 | 5  | 2 | 3 | 97012.73 | 377722.7 | 350956.4 |
| 491.8757 | 44.322   | 44.307   | 44.36817 | 10 | 5 | 5 | 607012.6 | 6470778  | 1757680  |
| 438.2492 | 10.81963 | 10.68362 | 10.95503 | 3  | 0 | 3 | 7804329  | 113754.3 | 107248.6 |
| 774.5951 | 42.36933 | 42.3625  | 42.41167 | 7  | 3 | 4 | 60798.43 | 221998.1 | 129559.9 |
| 568.0138 | 19.15833 | 19.1455  | 19.18817 | 3  | 0 | 3 | 62692.5  | 21661.58 | 46715.65 |
| 794.4145 | 8.753233 | 8.533633 | 8.822367 | 3  | 3 | 0 | 492558.6 | 750490   | 1016933  |
| 355.204  | 32.09017 | 32.04317 | 32.146   | 4  | 0 | 4 | 137541.6 | 237078.8 | 215779.1 |
| 405.1954 | 33.15    | 33.11033 | 33.15767 | 4  | 0 | 4 | 57091.12 | 76206.03 | 35599.65 |
| 357.8964 | 22.80117 | 22.76083 | 22.84267 | 5  | 1 | 4 | 106078.9 | 124163.8 | 223094.5 |
| 532.3175 | 25.22833 | 25.19717 | 25.23667 | 3  | 0 | 3 | 400168.1 | 203199.9 | 93235.41 |
| 227.0642 | 14.83018 | 14.78792 | 14.83058 | 3  | 0 | 3 | 135889.2 | 354280   | 199569.1 |
| 359.1898 | 33.1865  | 33.17267 | 33.20117 | 3  | 0 | 3 | 140157.8 | 433401.4 | 172451.2 |
| 521.4069 | 11.73803 | 11.70048 | 11.93567 | 8  | 4 | 4 | 3175945  | 10594482 | 10071175 |
| 198.958  | 22.82667 | 22.77517 | 22.84267 | 7  | 3 | 4 | 146241.5 | 291752.6 | 333669.6 |
| 434.5259 | 30.99383 | 30.96517 | 31.06583 | 6  | 1 | 5 | 202151.8 | 490990.6 | 1090698  |
| 793.6024 | 10.55375 | 10.46653 | 10.66922 | 7  | 2 | 5 | 437432.8 | 498964.7 | 460768.3 |
| 361.0773 | 15.8805  | 15.85927 | 15.89132 | 3  | 0 | 3 | 1086393  | 40752.68 | 62467.3  |
| 313.1643 | 30.41742 | 30.24367 | 30.54583 | 6  | 3 | 2 | 155775.6 | 160735.9 | 95245.44 |
| 347.1395 | 20.76592 | 20.715   | 20.7735  | 4  | 1 | 3 | 241030.1 | 234818.6 | 282407.2 |
| 497.3437 | 30.95767 | 30.93717 | 31.07383 | 10 | 5 | 5 | 12147315 | 1.11E+08 | 44316998 |
| 499.2999 | 12.10555 | 12.07067 | 12.22863 | 3  | 0 | 3 | 284966   | 23039.54 | 19422.98 |
| 286.0745 | 15.87585 | 15.85152 | 15.93562 | 5  | 2 | 3 | 61206.75 | 119472   | 176970.9 |
| 561.0166 | 27.19383 | 27.1935  | 27.22933 | 3  | 3 | 0 | 80085.48 | 232104.8 | 278205.7 |
| 271.1519 | 9.278167 | 9.257833 | 9.44975  | 3  | 0 | 3 | 746349.6 | 507944.7 | 854168   |
| 346.1208 | 19.97167 | 19.96967 | 20.09133 | 3  | 0 | 3 | 424602   | 23581.43 | 21899.41 |
| 393.1001 | 30.76225 | 30.48833 | 30.82067 | 4  | 1 | 3 | 95439.44 | 210525   | 353469.9 |
| 320.219  | 22.76783 | 22.70033 | 22.79867 | 7  | 3 | 4 | 86201.62 | 367664.4 | 307070.6 |
| 279.2262 | 30.806   | 30.39767 | 30.96417 | 9  | 2 | 4 | 16886970 | 50633630 | 60940840 |

|          |          |          |          |    |   |   |          |          |          |
|----------|----------|----------|----------|----|---|---|----------|----------|----------|
| 292.6074 | 30.543   | 30.5025  | 30.59083 | 5  | 1 | 4 | 81410.29 | 126898.3 | 243663.4 |
| 243.1382 | 31.6095  | 31.55617 | 31.69017 | 6  | 3 | 3 | 122698.2 | 426570.9 | 330056.5 |
| 628.9997 | 33.17267 | 33.13983 | 33.1865  | 3  | 0 | 3 | 154734.9 | 17333.49 | 16235.42 |
| 442.1715 | 23.19067 | 23.181   | 23.1945  | 4  | 1 | 3 | 84017.52 | 91003.97 | 119769.5 |
| 705.9777 | 9.4872   | 9.444983 | 9.584433 | 6  | 3 | 3 | 45169668 | 28760714 | 42940516 |
| 377.0893 | 12.72005 | 12.68802 | 12.80027 | 3  | 0 | 3 | 579586.3 | 32660.82 | 55082.36 |
| 473.209  | 14.34685 | 14.31912 | 14.35518 | 3  | 0 | 3 | 1463575  | 119815.7 | 213882.1 |
| 455.0573 | 25.6825  | 25.64683 | 25.70383 | 7  | 2 | 5 | 1562739  | 3613626  | 7863288  |
| 379.2123 | 44.32483 | 44.30683 | 44.337   | 4  | 0 | 4 | 65641.45 | 396248.4 | 172283.2 |
| 380.2801 | 24.93467 | 24.815   | 24.97667 | 7  | 2 | 5 | 546147   | 483066.9 | 556232.4 |
| 454.3172 | 18.54183 | 18.50633 | 18.5775  | 7  | 2 | 5 | 271145   | 1375181  | 1471603  |
| 521.385  | 38.88183 | 38.79533 | 39.001   | 8  | 5 | 3 | 137818.3 | 347503.7 | 363327.9 |
| 534.3331 | 24.66417 | 24.6535  | 24.67683 | 3  | 0 | 3 | 515098.3 | 184673.2 | 52141.03 |
| 794.4603 | 26.89817 | 26.85967 | 26.92167 | 3  | 0 | 3 | 88688.64 | 45736.57 | 20590.23 |
| 490.886  | 42.51833 | 42.50633 | 42.61617 | 3  | 0 | 3 | 451598.3 | 82422.05 | 92390.43 |
| 238.2282 | 12.18742 | 12.14343 | 12.36342 | 9  | 4 | 5 | 127210.2 | 339790.9 | 493037.8 |
| 485.9605 | 25.693   | 25.68617 | 25.69883 | 4  | 1 | 3 | 78704.5  | 184042.1 | 400886   |
| 659.2359 | 30.75458 | 30.5025  | 30.84967 | 4  | 1 | 3 | 110716.7 | 112944.1 | 224545.4 |
| 573.3254 | 42.8965  | 42.88067 | 43.02433 | 3  | 0 | 3 | 20622.61 | 84977.14 | 25468.81 |
| 326.0938 | 10.69557 | 10.64958 | 10.7506  | 4  | 1 | 3 | 831301.3 | 356233.8 | 511434.3 |
| 562.2356 | 22.93017 | 22.922   | 22.93417 | 3  | 0 | 3 | 418435   | 5639.133 | 7908.966 |
| 180.0384 | 17.1345  | 17.0515  | 17.23417 | 7  | 2 | 5 | 219107.9 | 417235.9 | 674524.4 |
| 1387.991 | 9.49235  | 9.473767 | 9.55075  | 3  | 0 | 3 | 4068321  | 1235917  | 1987588  |
| 220.0313 | 10.99628 | 10.92607 | 11.1221  | 4  | 3 | 1 | 2089817  | 2288979  | 2893014  |
| 348.2074 | 28.46133 | 28.41083 | 28.46717 | 4  | 0 | 4 | 863158.3 | 625540.1 | 80346.47 |
| 309.2277 | 9.848533 | 9.80805  | 9.932383 | 6  | 4 | 2 | 1355723  | 2068459  | 2688028  |
| 572.1598 | 10.64991 | 10.58428 | 10.712   | 4  | 1 | 3 | 777762.1 | 97285.25 | 178879.1 |
| 288.6414 | 32.12167 | 32.07183 | 32.20817 | 9  | 4 | 5 | 2765936  | 11386969 | 22224081 |
| 933.1465 | 9.416233 | 9.08515  | 9.5025   | 7  | 3 | 4 | 41545156 | 8789957  | 12683620 |
| 381.2694 | 16.91642 | 16.8785  | 17.01133 | 4  | 1 | 3 | 49249.18 | 64328.77 | 75606.44 |
| 366.7981 | 2.124233 | 2.032667 | 2.257733 | 4  | 0 | 4 | 237645.8 | 0        | 0        |
| 184.0059 | 20.43792 | 20.4255  | 20.56367 | 6  | 2 | 4 | 336233.6 | 1120590  | 1368165  |
| 330.1718 | 12.08832 | 12.07067 | 12.21482 | 4  | 0 | 4 | 20230956 | 86819.91 | 46400.86 |
| 747.5761 | 12.3989  | 12.35018 | 12.50992 | 9  | 4 | 5 | 897166.4 | 2645863  | 2704335  |
| 490.3845 | 42.53333 | 42.5035  | 42.54567 | 5  | 0 | 5 | 830773.8 | 339300.9 | 103617.8 |
| 539.0498 | 42.48583 | 42.439   | 42.53233 | 8  | 4 | 4 | 102236.8 | 880743   | 88668.23 |
| 454.2751 | 9.278583 | 9.2349   | 9.3081   | 3  | 3 | 0 | 6.64E+08 | 43572043 | 74087772 |
| 304.1252 | 32.16033 | 32.07333 | 32.16117 | 5  | 4 | 1 | 140818   | 503884.1 | 617281.7 |
| 423.4031 | 38.08333 | 38.0385  | 38.25133 | 10 | 5 | 5 | 372444.6 | 1915211  | 1522218  |
| 381.7715 | 14.66884 | 14.5922  | 14.79963 | 6  | 4 | 2 | 240810.5 | 361357.3 | 337266.9 |
| 478.401  | 18.887   | 18.8655  | 18.92333 | 6  | 3 | 3 | 298701.1 | 848627.1 | 690442.2 |
| 385.2146 | 31.03033 | 30.9885  | 31.06667 | 4  | 0 | 4 | 120063.2 | 467806.5 | 226401.8 |
| 517.2535 | 9.187083 | 9.101033 | 9.231383 | 3  | 3 | 0 | 1024329  | 1632779  | 1673789  |
| 488.2471 | 25.71342 | 25.6755  | 25.77767 | 4  | 1 | 3 | 48575.24 | 34673.87 | 59826.27 |
| 458.3243 | 29.63683 | 29.593   | 29.66617 | 4  | 3 | 1 | 40488.29 | 157291.3 | 70751.29 |
| 458.2446 | 21.473   | 21.37017 | 21.49317 | 3  | 0 | 3 | 216923.2 | 29497.52 | 18166.58 |
| 357.2429 | 36.15033 | 36.11267 | 36.15783 | 3  | 0 | 3 | 32293.84 | 197518.2 | 84478.24 |

|          |          |          |          |    |   |   |          |          |          |
|----------|----------|----------|----------|----|---|---|----------|----------|----------|
| 348.1556 | 28.23433 | 28.20833 | 28.23633 | 5  | 2 | 3 | 818561.7 | 549385.6 | 224556   |
| 598.4184 | 9.321717 | 9.291267 | 9.3379   | 5  | 2 | 3 | 4667683  | 1469734  | 1001913  |
| 165.0548 | 26.293   | 26.22433 | 26.32633 | 5  | 2 | 3 | 32251.39 | 176698.4 | 19279.49 |
| 780.4081 | 9.565117 | 9.52075  | 9.596683 | 5  | 4 | 1 | 31669024 | 5802862  | 9420443  |
| 490.9757 | 32.13283 | 32.10233 | 32.14983 | 6  | 1 | 5 | 123403.6 | 304771.8 | 667936.5 |
| 322.192  | 14.26585 | 14.2638  | 14.28625 | 5  | 1 | 4 | 18170708 | 496822.1 | 414437.6 |
| 621.5156 | 9.928175 | 9.881933 | 9.9629   | 8  | 4 | 4 | 884757.3 | 864024.6 | 904155.6 |
| 335.2782 | 16.30746 | 16.29342 | 16.32602 | 4  | 1 | 3 | 128055.7 | 119968.8 | 157982.2 |
| 342.1719 | 13.80373 | 13.79017 | 13.81968 | 4  | 0 | 4 | 5018240  | 20051.32 | 17838.57 |
| 758.3506 | 26.42033 | 26.36383 | 26.42867 | 3  | 0 | 3 | 128834.7 | 41583.02 | 24185.4  |
| 583.4113 | 42.1605  | 41.99083 | 42.24467 | 8  | 3 | 5 | 40847.51 | 211344   | 124587.3 |
| 311.5803 | 26.25267 | 26.15833 | 26.31783 | 7  | 2 | 5 | 93025.72 | 146832.3 | 298884.9 |
| 794.2472 | 8.753233 | 8.533633 | 8.808367 | 3  | 3 | 0 | 355127.2 | 505605.3 | 709690   |
| 1726.243 | 9.455083 | 9.401867 | 9.55075  | 4  | 1 | 3 | 20096828 | 3916241  | 6442753  |
| 266.2121 | 14.79466 | 14.7437  | 14.81522 | 4  | 1 | 3 | 44712.89 | 111938   | 51608.66 |
| 332.2307 | 27.2355  | 27.2285  | 27.272   | 3  | 0 | 3 | 57349.19 | 229662.6 | 65273.85 |
| 617.465  | 13.86349 | 13.77598 | 13.91533 | 10 | 5 | 5 | 495281.5 | 1813276  | 1819920  |
| 570.4583 | 37.45567 | 37.41983 | 37.5325  | 5  | 2 | 3 | 760423.3 | 1070179  | 845565.6 |
| 482.1724 | 9.71525  | 9.6609   | 9.7788   | 5  | 2 | 3 | 1177523  | 317630.7 | 216860.3 |
| 500.2281 | 19.9865  | 19.96967 | 20.10783 | 3  | 0 | 3 | 477833.3 | 7119.995 | 5064.022 |
| 715.3206 | 41.19283 | 41.16317 | 41.23617 | 9  | 5 | 4 | 105818.2 | 303197.3 | 144576.6 |
| 588.3035 | 29.22967 | 29.16983 | 29.23017 | 3  | 3 | 0 | 97602.73 | 199042.3 | 186160.4 |
| 328.297  | 9.834067 | 9.503117 | 9.932383 | 8  | 4 | 4 | 143237.9 | 206392.3 | 214829   |
| 289.139  | 28.5705  | 28.5565  | 28.67283 | 7  | 2 | 5 | 242962.3 | 551084.5 | 921833.1 |
| 519.3419 | 26.43417 | 26.36383 | 26.44317 | 3  | 0 | 3 | 262520.4 | 124946.7 | 103993   |
| 458.8236 | 32.53417 | 32.527   | 32.57233 | 5  | 1 | 4 | 117147.9 | 694058.7 | 475078.2 |
| 656.2521 | 32.146   | 32.07333 | 32.14633 | 3  | 3 | 0 | 66564.66 | 306287.8 | 404017.5 |
| 477.3415 | 20.27583 | 20.27567 | 20.41717 | 3  | 0 | 3 | 23806.95 | 30882.12 | 25282.68 |
| 552.0904 | 33.16458 | 33.13983 | 33.1875  | 4  | 0 | 4 | 463001.3 | 24302.05 | 11944.8  |
| 562.2359 | 19.908   | 19.897   | 20.02417 | 3  | 0 | 3 | 1048421  | 13528.48 | 17908.67 |
| 840.1426 | 32.12167 | 31.99733 | 32.22133 | 5  | 1 | 4 | 212967.8 | 389850   | 863476.4 |
| 623.9551 | 43.45533 | 43.43333 | 43.49533 | 10 | 5 | 5 | 2166070  | 27447372 | 5321811  |
| 636.404  | 9.987517 | 9.730617 | 10.03782 | 9  | 4 | 2 | 3172247  | 2066153  | 2400605  |
| 455.1986 | 19.88217 | 19.846   | 19.956   | 3  | 0 | 3 | 587212.4 | 118707   | 67584.16 |
| 747.222  | 41.20067 | 41.1485  | 41.23733 | 8  | 5 | 3 | 191088.7 | 770439.5 | 860821.5 |
| 518.9706 | 32.12842 | 32.0875  | 32.1605  | 6  | 1 | 5 | 246580.6 | 551311.3 | 1117499  |
| 769.0322 | 42.636   | 42.5855  | 42.67333 | 5  | 1 | 4 | 25799.75 | 75014.92 | 14755.55 |
| 634.4373 | 39.3695  | 39.3575  | 39.38733 | 3  | 0 | 3 | 291741.1 | 184903.5 | 70567.3  |
| 329.2091 | 35.60858 | 35.574   | 35.666   | 4  | 0 | 4 | 205826.2 | 581129.5 | 301713.5 |
| 514.2703 | 18.83467 | 18.83417 | 18.863   | 3  | 0 | 3 | 116400.3 | 57335.83 | 18730.59 |
| 166.9858 | 32.29767 | 32.26633 | 32.366   | 3  | 0 | 3 | 75497.2  | 819974   | 329478.3 |
| 415.0339 | 25.67708 | 25.64683 | 25.69883 | 6  | 1 | 5 | 455799.3 | 893835.2 | 1951581  |
| 658.1672 | 20.4115  | 20.382   | 20.45217 | 5  | 3 | 2 | 91921.84 | 318060.8 | 332848.7 |
| 242.1836 | 24.312   | 24.272   | 24.33283 | 4  | 3 | 1 | 42348.66 | 120338.6 | 145813   |
| 352.2853 | 13.87932 | 13.82233 | 13.9023  | 7  | 3 | 4 | 397028.5 | 881840.7 | 1189295  |
| 1037.743 | 9.525517 | 9.444983 | 9.64025  | 8  | 3 | 4 | 7168234  | 6333575  | 4634141  |
| 471.0282 | 29.1535  | 29.1255  | 29.2115  | 5  | 1 | 4 | 66382.89 | 67828.19 | 149879.2 |

|          |          |          |          |    |   |   |          |          |          |
|----------|----------|----------|----------|----|---|---|----------|----------|----------|
| 598.4536 | 26.44767 | 26.39317 | 26.52817 | 3  | 0 | 3 | 75933.63 | 36552.47 | 47246.64 |
| 908.6926 | 9.976267 | 9.8483   | 10.05848 | 6  | 1 | 3 | 386470.1 | 49192.55 | 76942.53 |
| 338.034  | 16.94233 | 16.92183 | 16.98567 | 7  | 5 | 2 | 37556.57 | 206645.1 | 89250.58 |
| 818.6219 | 42.199   | 42.1755  | 42.23333 | 4  | 1 | 3 | 36261.58 | 147160.7 | 78332.75 |
| 171.5901 | 28.23817 | 28.20567 | 28.264   | 5  | 2 | 3 | 64284.95 | 128736.4 | 226804.9 |
| 900.5585 | 11.15233 | 11.15068 | 11.18453 | 4  | 1 | 3 | 192499.1 | 85085.34 | 138011.4 |
| 345.9767 | 18.10408 | 17.98717 | 18.18483 | 4  | 1 | 3 | 87640.48 | 250734.9 | 287030.1 |
| 331.1309 | 23.03725 | 22.98917 | 23.09183 | 4  | 0 | 4 | 55302.25 | 64113.27 | 51619.74 |
| 632.261  | 22.11417 | 22.08617 | 22.136   | 4  | 3 | 1 | 260067   | 705544.8 | 874557   |
| 261.0958 | 5.652267 | 5.545033 | 5.76675  | 3  | 3 | 0 | 5567205  | 45760510 | 37169339 |
| 258.9747 | 22.81158 | 22.76083 | 22.82667 | 6  | 2 | 4 | 109978.8 | 156749.4 | 174447.7 |
| 395.1641 | 37.56533 | 37.486   | 37.59183 | 3  | 0 | 3 | 165863.5 | 140015.1 | 73336.81 |
| 288.1502 | 10.88871 | 10.86645 | 11.00872 | 4  | 0 | 4 | 56501080 | 556556.9 | 524125.7 |
| 704.5705 | 11.59961 | 11.5826  | 11.61482 | 6  | 3 | 3 | 193709.4 | 204817   | 288936.1 |
| 707.4759 | 9.500283 | 9.444983 | 9.584433 | 7  | 4 | 3 | 3.61E+08 | 2.76E+08 | 4.67E+08 |
| 921.5995 | 43.58875 | 43.5865  | 43.60167 | 8  | 3 | 5 | 141593.6 | 492286.3 | 672548.4 |
| 373.004  | 25.67292 | 25.64833 | 25.69883 | 6  | 1 | 5 | 564633.3 | 1354849  | 2949945  |
| 446.2906 | 21.38933 | 21.3015  | 21.4365  | 4  | 0 | 4 | 241190.2 | 104593   | 12534.19 |
| 390.1668 | 21.43608 | 21.31517 | 21.4795  | 6  | 4 | 2 | 176321   | 678951.2 | 746695.9 |
| 556.3046 | 31.56117 | 31.53817 | 31.61283 | 5  | 2 | 3 | 162411   | 564410.6 | 443525.7 |
| 259.8937 | 2.052283 | 2.0466   | 2.087617 | 3  | 0 | 3 | 222374.9 | 0        | 0        |
| 406.1388 | 31.56117 | 31.49917 | 31.61533 | 9  | 4 | 5 | 79297.57 | 452372.1 | 230529.3 |
| 259.6321 | 9.219458 | 9.101033 | 9.254883 | 4  | 3 | 1 | 881617.8 | 1796757  | 1685418  |
| 804.4904 | 9.905517 | 9.88085  | 9.96035  | 5  | 2 | 3 | 461204.8 | 232221.2 | 369909.5 |
| 307.2275 | 18.95317 | 18.93983 | 18.98183 | 3  | 0 | 3 | 223362.1 | 172337   | 88166.88 |
| 678.0435 | 9.537367 | 9.401867 | 9.572217 | 5  | 2 | 3 | 7749340  | 1530055  | 931924.6 |
| 416.1411 | 23.74567 | 23.73217 | 23.84167 | 5  | 5 | 0 | 98000.58 | 254545.5 | 317342.5 |
| 457.3622 | 12.21495 | 12.18742 | 12.3231  | 10 | 5 | 5 | 1810313  | 4707613  | 6134940  |
| 906.6748 | 29.561   | 29.43333 | 29.74967 | 7  | 2 | 4 | 168038.4 | 941557.5 | 1117314  |
| 456.3588 | 12.20066 | 12.17893 | 12.33633 | 10 | 5 | 5 | 6000076  | 17906018 | 21573757 |
| 291.0858 | 15.91033 | 15.85218 | 15.9483  | 3  | 3 | 0 | 45521.75 | 206678.9 | 179886.6 |
| 512.1225 | 38.15292 | 38.1125  | 38.21533 | 4  | 1 | 3 | 63402.92 | 86514.04 | 168073.1 |
| 489.3046 | 8.78305  | 8.690483 | 8.9587   | 3  | 3 | 0 | 2113755  | 12282882 | 9970063  |
| 489.2041 | 12.8356  | 12.78932 | 12.89353 | 3  | 0 | 3 | 1100269  | 143355.9 | 275562.9 |
| 286.636  | 29.163   | 29.1255  | 29.21267 | 5  | 1 | 4 | 76923.77 | 123212.5 | 230565.3 |
| 534.3329 | 23.29133 | 23.2845  | 23.29617 | 3  | 0 | 3 | 1279756  | 179550.6 | 87160.87 |
| 340.1615 | 32.15417 | 32.07267 | 32.19083 | 6  | 2 | 4 | 56817.43 | 426887.6 | 228007.9 |
| 351.2386 | 11.89957 | 11.84163 | 11.97495 | 7  | 3 | 4 | 157608.7 | 461121.9 | 540039.3 |
| 241.1915 | 10.40915 | 10.33325 | 10.43838 | 9  | 4 | 5 | 934732.9 | 2229609  | 2164347  |
| 599.4041 | 9.467675 | 9.321433 | 9.822867 | 8  | 3 | 4 | 3944809  | 5787779  | 3654759  |
| 411.1389 | 33.16458 | 33.15433 | 33.17267 | 4  | 0 | 4 | 469412.2 | 18263.69 | 8188.525 |
| 509.2579 | 10.69325 | 10.63273 | 10.70707 | 3  | 0 | 3 | 288680.2 | 136053.3 | 215996.3 |
| 403.342  | 44.00383 | 43.982   | 44.04317 | 10 | 5 | 5 | 1209669  | 6750599  | 7361915  |
| 324.8766 | 3.50025  | 3.418867 | 3.77065  | 4  | 0 | 3 | 1838008  | 65287.74 | 23509.8  |
| 484.788  | 8.8659   | 8.677417 | 8.9755   | 5  | 3 | 2 | 160835.3 | 258606   | 217731.1 |
| 316.1603 | 33.5085  | 33.49617 | 33.55283 | 4  | 0 | 4 | 76822.3  | 218953.8 | 55993.27 |
| 185.1286 | 22.50125 | 22.45817 | 22.53283 | 4  | 1 | 3 | 31787.45 | 111365.2 | 51436.23 |

|          |          |          |          |    |   |   |          |          |          |
|----------|----------|----------|----------|----|---|---|----------|----------|----------|
| 453.0556 | 19.36892 | 19.32383 | 19.3775  | 4  | 1 | 3 | 38525.89 | 47569.49 | 55638.78 |
| 429.121  | 18.775   | 18.7595  | 18.80333 | 3  | 0 | 3 | 1061905  | 143146.5 | 100039   |
| 746.5638 | 36.96217 | 36.93783 | 37.06767 | 6  | 2 | 4 | 703343.8 | 1349504  | 1033482  |
| 400.3062 | 29.88567 | 29.56383 | 29.92167 | 11 | 5 | 5 | 283273.8 | 2318704  | 438947   |
| 846.6827 | 10.22917 | 9.946617 | 10.25657 | 9  | 4 | 5 | 602366.1 | 315659.5 | 403524.5 |
| 441.1823 | 23.6005  | 23.58183 | 23.6035  | 3  | 0 | 3 | 620068.4 | 221316.6 | 86546.51 |
| 422.2444 | 12.43634 | 12.39998 | 12.53633 | 4  | 0 | 4 | 4555109  | 74426.94 | 51991.71 |
| 386.0356 | 25.69158 | 25.68417 | 25.70383 | 4  | 1 | 3 | 50469.98 | 108498.1 | 236119.3 |
| 708.9738 | 9.515    | 9.173283 | 9.56285  | 7  | 2 | 4 | 26055734 | 13999049 | 21909895 |
| 518.3382 | 26.4245  | 26.3785  | 26.43    | 4  | 0 | 4 | 829670.4 | 544836.3 | 476830.3 |
| 453.0619 | 25.67708 | 25.64683 | 25.69883 | 6  | 1 | 5 | 149262.8 | 306941   | 673027.7 |
| 612.3929 | 24.5255  | 24.50683 | 24.56217 | 3  | 0 | 3 | 219508.9 | 45577.65 | 22033.77 |
| 543.0268 | 30.39617 | 30.3515  | 30.4275  | 3  | 0 | 3 | 49177.68 | 35052.7  | 67161.53 |
| 355.1671 | 12.72567 | 12.70077 | 12.84028 | 4  | 0 | 4 | 1910316  | 33405.78 | 19668.05 |
| 654.2533 | 32.08817 | 32.05883 | 32.11667 | 3  | 3 | 0 | 134300.6 | 523842.1 | 671177.2 |
| 835.5848 | 34.06117 | 33.9945  | 34.12667 | 6  | 3 | 3 | 95149.7  | 184498.1 | 86305.85 |
| 356.1889 | 32.10367 | 32.07333 | 32.14983 | 6  | 1 | 5 | 49809.7  | 96855.52 | 155326.7 |
| 460.2701 | 21.49267 | 21.47617 | 21.52233 | 8  | 5 | 3 | 342741.6 | 472096.5 | 234009.2 |
| 507.3293 | 33.17783 | 33.15433 | 33.2025  | 3  | 0 | 3 | 51010.15 | 264742.2 | 133884.8 |
| 338.5961 | 29.12633 | 29.06817 | 29.2115  | 5  | 1 | 4 | 89805.79 | 189939.4 | 362048.5 |
| 534.3333 | 24.31467 | 24.3145  | 24.34267 | 3  | 0 | 3 | 766634.7 | 189773   | 57553.16 |
| 423.1386 | 37.00675 | 36.97717 | 37.02017 | 4  | 0 | 4 | 765195.9 | 7924.047 | 3425.399 |
| 406.7227 | 30.89883 | 30.89217 | 30.9325  | 4  | 4 | 0 | 134098.3 | 355495.5 | 472268.2 |
| 442.2355 | 10.67149 | 10.6177  | 10.75237 | 8  | 3 | 5 | 2825232  | 4032958  | 5815134  |
| 774.9633 | 30.94733 | 30.93483 | 30.95217 | 3  | 3 | 0 | 100256.9 | 177588.3 | 246178.7 |
| 804.0982 | 31.00142 | 30.99333 | 31.0595  | 4  | 1 | 3 | 159600.1 | 48429.14 | 103057.3 |
| 305.152  | 20.6845  | 20.67083 | 20.71717 | 3  | 0 | 3 | 3599422  | 107886.3 | 76175.35 |
| 323.022  | 17.15642 | 17.0515  | 17.2135  | 10 | 5 | 5 | 3164099  | 8195953  | 15152649 |
| 607.3249 | 33.52067 | 33.51067 | 33.55283 | 3  | 0 | 3 | 100245   | 47720.96 | 43637.68 |
| 542.1933 | 10.40144 | 10.36523 | 10.43838 | 8  | 3 | 5 | 1574789  | 776719.3 | 885207.8 |
| 282.1313 | 26.22417 | 26.173   | 26.30383 | 8  | 3 | 5 | 593708.3 | 1452456  | 2168991  |
| 326.0981 | 27.03508 | 27.014   | 27.05417 | 6  | 3 | 3 | 423832.9 | 1427045  | 1787746  |
| 323.1953 | 14.27142 | 14.26493 | 14.293   | 5  | 1 | 4 | 3873493  | 52995.52 | 32044.96 |
| 563.239  | 22.93417 | 22.922   | 22.95983 | 3  | 0 | 3 | 126087.7 | 12349.16 | 13006.36 |
| 670.5108 | 42.8225  | 42.78533 | 42.83517 | 7  | 3 | 4 | 38632.52 | 190451.6 | 58442.51 |
| 1869.235 | 9.515    | 9.473767 | 9.537367 | 5  | 2 | 3 | 5852235  | 1697473  | 2515153  |
| 445.9705 | 8.711442 | 8.4609   | 8.742017 | 4  | 4 | 0 | 89149.63 | 238644.1 | 188787.9 |
| 481.0928 | 32.13233 | 32.07267 | 32.146   | 6  | 1 | 5 | 77073.32 | 162364   | 346594.7 |
| 571.4154 | 43.738   | 43.68867 | 43.77583 | 10 | 5 | 5 | 437981.3 | 4130632  | 974000.1 |
| 253.1952 | 25.89617 | 25.8365  | 25.90267 | 5  | 2 | 3 | 78942.33 | 307432.3 | 275260.2 |
| 469.361  | 44.47425 | 44.45483 | 44.52517 | 10 | 5 | 5 | 624124.2 | 7392992  | 1170164  |
| 444.0622 | 32.14542 | 32.0875  | 32.1605  | 6  | 1 | 5 | 125676.6 | 277719.2 | 562516.4 |
| 315.6309 | 29.12633 | 29.10917 | 29.15467 | 7  | 5 | 2 | 166208.4 | 571192.6 | 551017.7 |
| 768.7859 | 25.67692 | 25.61833 | 25.7185  | 6  | 1 | 5 | 49588.66 | 69617.79 | 137846.8 |
| 420.3689 | 44.00417 | 43.97383 | 44.01633 | 6  | 3 | 3 | 105155.3 | 498703.1 | 606531.1 |
| 440.0446 | 22.15017 | 22.02933 | 22.201   | 6  | 2 | 4 | 79833.8  | 200378.1 | 269545.2 |
| 706.4741 | 9.515    | 9.186383 | 9.584433 | 9  | 5 | 3 | 7.15E+08 | 5.69E+08 | 9.1E+08  |

|          |          |          |          |    |   |   |          |          |          |
|----------|----------|----------|----------|----|---|---|----------|----------|----------|
| 626.9844 | 31.32933 | 31.31433 | 31.34333 | 3  | 0 | 3 | 195702.8 | 8221.304 | 3614.652 |
| 468.9519 | 17.14583 | 17.0515  | 17.18383 | 5  | 1 | 4 | 376636.2 | 738887.9 | 1582393  |
| 427.1053 | 17.71217 | 17.70317 | 17.72083 | 3  | 0 | 3 | 342505.9 | 62186.61 | 107621.5 |
| 618.8956 | 32.15417 | 32.12167 | 32.1605  | 4  | 1 | 3 | 117158.4 | 306716.6 | 674969.5 |
| 416.9023 | 15.90842 | 15.89132 | 15.92517 | 4  | 1 | 3 | 214540.2 | 191870.9 | 346769.5 |
| 687.289  | 9.537367 | 9.502483 | 9.596683 | 5  | 3 | 2 | 1606211  | 2182438  | 1982560  |
| 404.3014 | 24.12208 | 24.06017 | 24.13617 | 4  | 1 | 3 | 88166.69 | 266465.5 | 252437.2 |
| 721.1943 | 29.12633 | 29.1185  | 29.24117 | 7  | 2 | 5 | 175809.5 | 400455.8 | 762113.7 |
| 526.9869 | 19.15833 | 19.1455  | 19.18817 | 3  | 0 | 3 | 69571.91 | 35155.05 | 67463.4  |
| 570.4288 | 35.80883 | 35.67983 | 35.85367 | 4  | 3 | 0 | 37207.82 | 125954.6 | 95565.72 |
| 373.5614 | 29.11867 | 29.094   | 29.2115  | 4  | 1 | 3 | 57943.72 | 43126.1  | 93829.23 |
| 332.5955 | 26.25567 | 26.21033 | 26.28967 | 3  | 0 | 3 | 35481.3  | 40219.08 | 74722.93 |
| 338.2234 | 15.76693 | 15.76425 | 15.79215 | 3  | 0 | 3 | 704330.8 | 74890.21 | 40736.07 |
| 681.4818 | 43.07642 | 43.03983 | 43.101   | 10 | 5 | 5 | 131463.5 | 1377259  | 267373.1 |
| 221.1057 | 28.1615  | 28.07417 | 28.17683 | 5  | 3 | 2 | 4398399  | 2382452  | 3425772  |
| 560.0104 | 18.10617 | 18.07167 | 18.155   | 6  | 2 | 4 | 81393.95 | 171315.7 | 211540.4 |
| 679.6787 | 9.456067 | 9.446567 | 9.572217 | 3  | 3 | 0 | 18891242 | 4397300  | 5049679  |
| 366.2545 | 22.15317 | 22.10033 | 22.209   | 3  | 0 | 3 | 1054593  | 6321.42  | 4775.197 |
| 401.2647 | 10.42096 | 10.37933 | 10.5262  | 10 | 4 | 5 | 7.09E+08 | 2.11E+09 | 2.82E+09 |
| 368.2649 | 11.89553 | 11.84163 | 11.97157 | 6  | 2 | 4 | 195010   | 493448.1 | 588529.5 |
| 303.2321 | 37.00567 | 36.8225  | 37.02017 | 5  | 1 | 4 | 136082.2 | 444396.9 | 445752.6 |
| 282.63   | 18.775   | 18.71483 | 18.80333 | 3  | 0 | 3 | 132240.2 | 5187.417 | 6833.042 |
| 397.8054 | 34.14267 | 34.11267 | 34.148   | 6  | 2 | 4 | 295027.7 | 415280.9 | 461503.4 |
| 453.1581 | 20.55417 | 20.52533 | 20.65633 | 4  | 0 | 4 | 7742535  | 32485250 | 42462769 |
| 469.347  | 11.74298 | 11.68558 | 11.94995 | 7  | 3 | 4 | 214303.8 | 603295.7 | 514935.6 |
| 331.1752 | 12.0954  | 12.07067 | 12.21482 | 4  | 0 | 4 | 4308330  | 41122.04 | 17620.71 |
| 443.0792 | 29.32283 | 29.28967 | 29.38917 | 4  | 1 | 3 | 528437.7 | 1093552  | 1969146  |
| 667.9812 | 43.19625 | 43.168   | 43.23283 | 10 | 5 | 5 | 1678031  | 23068229 | 7267297  |
| 219.0995 | 12.09603 | 11.82735 | 12.17275 | 4  | 0 | 3 | 52296.02 | 67574.45 | 45330.92 |
| 620.2459 | 32.10167 | 32.05883 | 32.146   | 3  | 3 | 0 | 218905   | 1040711  | 1463436  |
| 345.2076 | 10.66614 | 10.58428 | 10.77118 | 10 | 5 | 5 | 630168.4 | 1939221  | 2466443  |
| 963.7402 | 42.55092 | 42.50633 | 42.563   | 6  | 1 | 5 | 1308586  | 293140.5 | 342279.3 |
| 747.5444 | 19.15917 | 19.13767 | 19.199   | 8  | 3 | 5 | 100921.3 | 240565.3 | 260543.3 |
| 293.6367 | 32.08    | 32.04433 | 32.12933 | 6  | 5 | 1 | 137697.8 | 716278.4 | 754535.2 |
| 779.4407 | 9.547767 | 9.4881   | 9.6125   | 9  | 5 | 4 | 89968072 | 56899734 | 87214939 |
| 522.4099 | 12.05893 | 11.94995 | 12.09955 | 6  | 2 | 4 | 248430.1 | 75771.27 | 103189.4 |
| 736.4713 | 10.26946 | 10.19577 | 10.27938 | 4  | 0 | 4 | 115425.6 | 62777.46 | 72658.81 |
| 351.594  | 29.24267 | 29.2135  | 29.31467 | 6  | 2 | 4 | 126168   | 189742.6 | 390272.2 |
| 342.1439 | 19.39867 | 19.3775  | 19.42283 | 3  | 0 | 3 | 215148.5 | 26733.73 | 30643.52 |
| 314.1472 | 30.44908 | 30.33317 | 30.4965  | 10 | 5 | 5 | 2515230  | 8748256  | 6207834  |
| 962.737  | 42.54625 | 42.49183 | 42.747   | 8  | 2 | 5 | 2555352  | 549946   | 563775.7 |
| 463.1716 | 31.45342 | 31.31833 | 31.63033 | 10 | 5 | 5 | 803267.3 | 11008224 | 14275346 |
| 287.6437 | 32.12167 | 32.08783 | 32.17767 | 5  | 1 | 4 | 184332.3 | 469357.4 | 956522.8 |
| 831.6256 | 34.74725 | 34.72133 | 34.76067 | 4  | 1 | 3 | 61740.32 | 53004.06 | 68558.81 |
| 801.4338 | 22.845   | 22.78167 | 22.88    | 3  | 3 | 0 | 115194.7 | 383005.7 | 544162   |
| 199.1888 | 21.66425 | 21.557   | 21.67117 | 4  | 3 | 1 | 129057.7 | 968831.5 | 589598.5 |
| 258.1324 | 9.199792 | 9.101033 | 9.280533 | 8  | 5 | 3 | 9136076  | 19190818 | 15070816 |

|          |          |          |          |    |   |   |          |          |          |
|----------|----------|----------|----------|----|---|---|----------|----------|----------|
| 749.2203 | 41.21525 | 41.193   | 41.23967 | 4  | 3 | 1 | 120059.2 | 427117.7 | 509271   |
| 443.241  | 24.10667 | 24.08017 | 24.13883 | 5  | 2 | 3 | 50824.36 | 229549.3 | 161494.4 |
| 347.186  | 11.27073 | 11.24588 | 11.31883 | 5  | 3 | 2 | 87137.02 | 245517   | 249244.8 |
| 384.0042 | 18.12192 | 18.03083 | 18.155   | 6  | 2 | 4 | 732609.6 | 2676516  | 3535066  |
| 260.1309 | 9.215108 | 9.101033 | 9.280533 | 6  | 4 | 2 | 3851679  | 6327032  | 5876015  |
| 617.852  | 10.01747 | 9.981967 | 10.05848 | 6  | 3 | 3 | 107928.5 | 156225.4 | 233226.3 |
| 540.24   | 28.34867 | 28.34517 | 28.396   | 3  | 3 | 0 | 65315.62 | 147226.3 | 201010.7 |
| 595.409  | 10.85758 | 10.81753 | 10.88395 | 6  | 2 | 4 | 538679.8 | 772163.1 | 874304.9 |
| 706.9753 | 9.500675 | 9.444983 | 9.584433 | 6  | 3 | 3 | 6.05E+08 | 5.37E+08 | 7.92E+08 |
| 668.5126 | 11.13852 | 11.13642 | 11.14323 | 5  | 2 | 3 | 137632.2 | 127334.3 | 236373.6 |
| 541.0097 | 30.82067 | 30.777   | 30.84967 | 3  | 0 | 3 | 53725.35 | 78342.96 | 159716.1 |
| 388.1323 | 38.74817 | 38.72117 | 38.775   | 5  | 2 | 3 | 209036.5 | 138594   | 263811.9 |
| 780.4438 | 9.5558   | 9.4881   | 9.6125   | 7  | 4 | 3 | 31669024 | 21985766 | 33180824 |
| 289.1538 | 10.88161 | 10.86645 | 11.00872 | 4  | 0 | 4 | 11776681 | 96860.23 | 65196.29 |
| 872.5475 | 9.506567 | 9.459367 | 9.52075  | 4  | 0 | 4 | 2141019  | 1512823  | 1541206  |
| 496.3402 | 30.95767 | 30.93717 | 31.07383 | 10 | 5 | 5 | 43917796 | 4.08E+08 | 1.64E+08 |
| 580.422  | 19.94733 | 19.92333 | 20.0745  | 9  | 4 | 5 | 119178.8 | 241174   | 385199.1 |
| 206.5879 | 27.19583 | 27.15783 | 27.2815  | 3  | 0 | 3 | 20244.28 | 22403.48 | 29443.82 |
| 375.1832 | 34.71883 | 34.70717 | 34.73417 | 5  | 2 | 3 | 113043.6 | 361455.8 | 391030.1 |
| 306.2572 | 22.98833 | 22.98383 | 23.048   | 3  | 0 | 3 | 43257760 | 1.58E+08 | 1.69E+08 |
| 498.1786 | 29.6515  | 29.56383 | 29.65167 | 5  | 2 | 3 | 56204.98 | 80630.35 | 145468.2 |
| 440.2466 | 12.26254 | 12.24235 | 12.39008 | 4  | 0 | 4 | 597382.5 | 16943.64 | 14633.58 |
| 697.443  | 9.321717 | 9.291267 | 9.349817 | 5  | 2 | 3 | 980833.5 | 591415.5 | 705372.4 |
| 429.226  | 10.40805 | 10.34782 | 10.47002 | 5  | 2 | 3 | 6938484  | 3733017  | 6207125  |
| 371.1836 | 29.6295  | 29.57867 | 29.65167 | 4  | 1 | 3 | 105125.9 | 106594.1 | 40156.46 |
| 429.2235 | 28.89767 | 28.894   | 28.92183 | 3  | 0 | 3 | 36955.65 | 24127.89 | 12968.43 |
| 832.637  | 44.78242 | 44.76633 | 44.86    | 10 | 5 | 5 | 1509687  | 12633145 | 3669999  |
| 262.1805 | 25.85725 | 25.8365  | 25.887   | 6  | 3 | 3 | 99133.96 | 404348.9 | 297390.2 |
| 271.2828 | 24.66592 | 24.61433 | 24.67567 | 6  | 3 | 3 | 212444.4 | 222164.4 | 214905.2 |
| 367.7218 | 9.537367 | 9.4881   | 9.596683 | 9  | 5 | 4 | 4.66E+08 | 5.75E+08 | 9.45E+08 |
| 248.0219 | 17.1045  | 17.00833 | 17.1765  | 4  | 1 | 3 | 54611.66 | 99158.9  | 147692.4 |
| 488.1035 | 28.21967 | 28.2065  | 28.2495  | 5  | 1 | 4 | 100837   | 206032   | 394808.9 |
| 478.4012 | 11.08713 | 10.97798 | 11.20103 | 10 | 5 | 5 | 1481993  | 2253153  | 3031397  |
| 494.0328 | 28.6485  | 28.59783 | 28.67317 | 4  | 1 | 3 | 67839.73 | 64582.88 | 119433.1 |
| 303.2174 | 34.21983 | 34.10617 | 34.25717 | 5  | 3 | 2 | 336463.5 | 1220910  | 1564863  |
| 863.131  | 29.25183 | 29.21333 | 29.3435  | 4  | 0 | 4 | 91998.02 | 126040.2 | 278020.2 |
| 769.1948 | 29.14033 | 29.08283 | 29.22633 | 7  | 2 | 5 | 276321.1 | 746742.2 | 1187380  |
| 447.5338 | 32.12167 | 32.07333 | 32.2235  | 5  | 1 | 4 | 171933.3 | 485265.9 | 1085087  |
| 280.1913 | 27.32075 | 27.186   | 27.36317 | 6  | 3 | 3 | 93967.16 | 331582.5 | 279708.3 |
| 338.089  | 16.813   | 16.79183 | 16.84533 | 3  | 0 | 3 | 305415.3 | 137497.4 | 205258.4 |
| 681.2139 | 8.766517 | 8.533633 | 8.808367 | 4  | 4 | 0 | 775876.4 | 1165233  | 1670321  |
| 519.9072 | 44.05583 | 44.02433 | 44.10967 | 5  | 0 | 5 | 785903.7 | 139887.1 | 146242.8 |
| 543.4301 | 31.68633 | 31.66867 | 31.704   | 7  | 2 | 5 | 229239.9 | 160481.2 | 173949.7 |
| 236.2226 | 22.19467 | 22.18783 | 22.209   | 4  | 3 | 1 | 105230.9 | 465137.9 | 519215   |
| 866.1003 | 42.18092 | 42.09333 | 42.25983 | 6  | 3 | 3 | 38971.07 | 195719.2 | 113819   |
| 735.2362 | 41.193   | 41.14833 | 41.25083 | 5  | 1 | 4 | 65147.01 | 95989.66 | 54307.18 |
| 901.4499 | 10.38153 | 10.37652 | 10.39378 | 4  | 1 | 3 | 1542187  | 961045.8 | 1771163  |



|          |          |          |          |    |   |   |          |          |          |
|----------|----------|----------|----------|----|---|---|----------|----------|----------|
| 336.2211 | 43.572   | 43.52883 | 43.60167 | 7  | 5 | 2 | 242436.9 | 1320464  | 709008.1 |
| 519.4055 | 44.07925 | 44.04017 | 44.10967 | 4  | 0 | 4 | 1299569  | 423856.8 | 270764.3 |
| 312.2328 | 12.68983 | 12.66875 | 12.78712 | 10 | 5 | 5 | 593354.1 | 1845089  | 2311410  |
| 350.88   | 9.500283 | 9.463983 | 9.537367 | 5  | 2 | 3 | 7979815  | 1684645  | 2308879  |
| 603.2103 | 22.31867 | 22.29433 | 22.35567 | 3  | 0 | 3 | 379777.4 | 24985.85 | 21639.65 |
| 453.8437 | 10.54903 | 10.25248 | 10.58333 | 9  | 5 | 4 | 2176946  | 2021313  | 2375039  |
| 589.2307 | 24.01533 | 23.9985  | 24.01817 | 3  | 0 | 3 | 332580.1 | 15245.91 | 19601.21 |
| 442.1857 | 23.58183 | 23.574   | 23.58517 | 3  | 0 | 3 | 136364   | 59752.17 | 21358.11 |
| 745.2255 | 41.1935  | 41.1485  | 41.25083 | 9  | 5 | 4 | 331616   | 1500787  | 1595350  |
| 381.2699 | 14.6373  | 14.51372 | 14.78443 | 7  | 3 | 4 | 470372.3 | 992076.1 | 887611.4 |
| 564.2519 | 18.775   | 18.7595  | 18.81833 | 3  | 0 | 3 | 468344.3 | 95190.15 | 48785.4  |
| 500.349  | 10.22048 | 9.970683 | 10.27065 | 8  | 3 | 5 | 122320.9 | 144452   | 136842.2 |
| 454.3686 | 29.7245  | 29.7105  | 29.76983 | 8  | 3 | 5 | 479865.9 | 914047   | 942397.7 |
| 509.1176 | 21.76967 | 21.765   | 21.77133 | 3  | 0 | 3 | 69865.76 | 37289.01 | 54197.75 |
| 584.3282 | 43.61042 | 43.58783 | 43.6635  | 4  | 3 | 1 | 104682   | 2214377  | 987199.7 |
| 228.1959 | 43.09708 | 43.084   | 43.12883 | 10 | 5 | 5 | 103719.5 | 1257412  | 186275.1 |
| 340.3215 | 38.06875 | 38.0535  | 38.25133 | 10 | 5 | 5 | 486925.6 | 2254901  | 1745308  |
| 700.1289 | 26.13683 | 26.06517 | 26.21917 | 5  | 2 | 3 | 58667.74 | 63029.49 | 96583.5  |
| 341.2447 | 10.42819 | 10.37933 | 10.55263 | 8  | 3 | 5 | 641743.5 | 1428820  | 819705.6 |
| 679.4081 | 9.579008 | 9.387317 | 9.722833 | 4  | 3 | 1 | 26321044 | 34999144 | 65972149 |
| 228.1959 | 42.2435  | 42.21617 | 42.25767 | 5  | 2 | 3 | 59984.68 | 696461.3 | 90027.17 |
| 551.3233 | 25.84783 | 25.80817 | 25.87367 | 3  | 0 | 3 | 231708.1 | 111786.8 | 45239.94 |
| 230.0937 | 10.40585 | 10.36523 | 10.4628  | 6  | 2 | 4 | 2633499  | 2049054  | 3900304  |
| 571.8779 | 18.69475 | 18.65533 | 18.77817 | 8  | 3 | 5 | 173199.9 | 362757.8 | 573978.3 |
| 542.1588 | 21.74217 | 21.74033 | 21.765   | 3  | 0 | 3 | 104381   | 2598.548 | 4374.882 |
| 509.0483 | 31.32883 | 31.31433 | 31.32933 | 3  | 0 | 3 | 288659.2 | 24044.83 | 49117.53 |
| 356.1511 | 14.11633 | 14.11493 | 14.11725 | 3  | 0 | 3 | 1147975  | 68362.39 | 85213.42 |
| 193.0861 | 24.03283 | 24.00183 | 24.0475  | 3  | 0 | 3 | 99006.09 | 248127.9 | 49031.5  |
| 568.1304 | 15.85927 | 15.84472 | 15.8953  | 3  | 0 | 3 | 41558.41 | 9824.4   | 17727.37 |
| 538.4008 | 12.16294 | 12.1357  | 12.29612 | 10 | 5 | 5 | 704228.5 | 1874895  | 2487454  |
| 988.6105 | 11.40008 | 11.38157 | 11.41437 | 3  | 0 | 3 | 66655.75 | 56613.05 | 83588.81 |
| 721.2598 | 41.19333 | 41.178   | 41.23617 | 8  | 4 | 4 | 196866.2 | 868409.4 | 907369.4 |
| 311.1954 | 14.8892  | 14.8622  | 14.90458 | 3  | 0 | 3 | 445418.6 | 84519.23 | 33227.14 |
| 932.6445 | 9.36625  | 9.101033 | 9.446567 | 7  | 3 | 4 | 38904676 | 7883024  | 11936159 |
| 352.2487 | 19.2755  | 19.26433 | 19.4025  | 5  | 1 | 4 | 2102118  | 1018487  | 772149.9 |
| 229.5977 | 10.41571 | 10.33325 | 10.4628  | 8  | 2 | 5 | 889766.2 | 1023498  | 1809480  |
| 397.9991 | 19.47875 | 19.43133 | 19.57683 | 4  | 1 | 3 | 43893.2  | 91304.61 | 159493.1 |
| 259.1309 | 9.210858 | 9.101033 | 9.280533 | 6  | 4 | 2 | 4998536  | 9293393  | 8245464  |
| 526.8871 | 44.023   | 43.99667 | 44.04317 | 10 | 5 | 5 | 600397.8 | 7130225  | 1861266  |
| 686.3648 | 31.31433 | 31.301   | 31.33233 | 3  | 0 | 3 | 72477.44 | 52908.08 | 20081.65 |
| 576.4114 | 29.95225 | 29.9205  | 29.97217 | 10 | 5 | 5 | 2382633  | 24086270 | 4404109  |
| 483.4525 | 31.69833 | 31.649   | 31.72517 | 5  | 2 | 3 | 40100.97 | 90970.27 | 97061.31 |
| 324.0252 | 17.14717 | 17.06583 | 17.23417 | 6  | 2 | 4 | 343181.9 | 814644.8 | 1466515  |
| 369.5996 | 28.0435  | 27.927   | 28.13083 | 9  | 4 | 5 | 116860.3 | 553703.5 | 534558.5 |
| 434.7803 | 8.699883 | 8.479117 | 8.780583 | 5  | 3 | 2 | 119540.6 | 445704.9 | 332201.3 |
| 419.1273 | 26.92883 | 26.87617 | 26.95533 | 5  | 2 | 3 | 46086.98 | 76220.59 | 83691.97 |
| 456.202  | 19.8525  | 19.846   | 19.99017 | 3  | 0 | 3 | 151841.5 | 44489.45 | 24097.67 |

|          |          |          |          |    |   |   |          |          |          |
|----------|----------|----------|----------|----|---|---|----------|----------|----------|
| 498.4003 | 31.7265  | 31.70967 | 31.75817 | 9  | 4 | 5 | 897881.7 | 1144386  | 1201772  |
| 829.3509 | 10.69325 | 10.6408  | 10.7506  | 5  | 2 | 3 | 601672.9 | 788542.5 | 1072083  |
| 463.1747 | 24.267   | 24.2465  | 24.272   | 3  | 3 | 0 | 48863.48 | 120870.8 | 158068.6 |
| 316.6385 | 30.24533 | 30.23183 | 30.31867 | 9  | 5 | 4 | 141801.2 | 422176.5 | 428098.3 |
| 274.6358 | 30.99417 | 30.93567 | 31.088   | 5  | 1 | 4 | 71406.2  | 95759.97 | 208560.9 |
| 374.2914 | 12.38836 | 12.3356  | 12.444   | 8  | 4 | 4 | 259490.3 | 763844   | 681635.8 |
| 574.412  | 33.53817 | 33.5255  | 33.5635  | 5  | 2 | 3 | 104609.7 | 320931.1 | 193063.8 |
| 621.3944 | 9.935108 | 9.871633 | 9.977267 | 4  | 0 | 4 | 250608.9 | 174092.3 | 179814.7 |
| 529.3822 | 33.65567 | 33.56633 | 33.71167 | 8  | 5 | 3 | 821790.6 | 2563105  | 2763967  |
| 173.2615 | 9.473767 | 9.460417 | 9.537367 | 5  | 1 | 3 | 3320147  | 914300.6 | 895989.3 |
| 306.1219 | 32.175   | 32.161   | 32.20567 | 3  | 3 | 0 | 80641.24 | 246629.6 | 339293.5 |
| 468.8607 | 12.73435 | 12.65595 | 12.84028 | 3  | 0 | 3 | 38022.75 | 67264.21 | 145841.4 |
| 704.5701 | 20.31383 | 20.28117 | 20.45917 | 6  | 1 | 5 | 93910.41 | 153027.8 | 146534.8 |
| 613.2617 | 10.70731 | 10.6177  | 10.77118 | 4  | 1 | 3 | 960402.9 | 502672.2 | 687642.5 |
| 246.8622 | 2.093533 | 2.01865  | 2.14135  | 4  | 0 | 4 | 1406310  | 0        | 0        |
| 298.3108 | 28.59783 | 28.58517 | 28.65183 | 7  | 3 | 4 | 210720.1 | 205250.7 | 183285.2 |
| 622.2429 | 32.10925 | 32.07333 | 32.1315  | 4  | 4 | 0 | 195139.4 | 847719.4 | 1213026  |
| 335.0186 | 26.65017 | 26.64117 | 26.65383 | 3  | 0 | 3 | 56490.49 | 59990.02 | 82219.5  |
| 404.2433 | 29.70317 | 29.68083 | 29.97433 | 4  | 3 | 1 | 35944.05 | 129145.6 | 44356.09 |
| 445.1571 | 37.02283 | 37.00567 | 37.03517 | 3  | 0 | 3 | 52093.35 | 88190.45 | 43155.03 |
| 396.3593 | 11.03672 | 10.9623  | 11.1144  | 8  | 3 | 5 | 1068417  | 2515616  | 3002493  |
| 376.3143 | 38.65433 | 38.59433 | 38.7505  | 9  | 5 | 4 | 148620.2 | 1079386  | 638489.8 |
| 686.162  | 31.00108 | 30.9645  | 31.07383 | 6  | 1 | 5 | 669593.4 | 430338.2 | 861836.7 |
| 470.2656 | 10.12773 | 9.970683 | 10.23408 | 3  | 0 | 3 | 236068.8 | 60641.19 | 29214.39 |
| 559.4767 | 33.72817 | 33.6645  | 33.8395  | 7  | 2 | 5 | 42838.16 | 115388.1 | 93087.77 |
| 474.6725 | 42.92583 | 42.91283 | 42.97367 | 5  | 4 | 1 | 60083.79 | 470431.6 | 161427.4 |
| 330.2499 | 28.183   | 28.16133 | 28.22333 | 5  | 0 | 5 | 190845.1 | 699862.1 | 226013.7 |
| 345.3199 | 34.401   | 34.3555  | 34.424   | 5  | 3 | 2 | 20473.3  | 97057.29 | 59401.44 |
| 757.1996 | 29.25925 | 29.257   | 29.32917 | 4  | 1 | 3 | 69986.16 | 134288.7 | 118973.1 |
| 836.3501 | 10.65798 | 10.64867 | 10.7167  | 4  | 3 | 1 | 900021.6 | 1068066  | 1083595  |
| 313.1438 | 30.44583 | 30.34733 | 30.4965  | 10 | 5 | 5 | 12753119 | 47253842 | 33188047 |
| 315.1207 | 30.7775  | 30.7045  | 30.893   | 5  | 1 | 4 | 38280.53 | 75627.11 | 46813.19 |
| 331.1558 | 13.16914 | 13.13913 | 13.21922 | 4  | 0 | 4 | 2566301  | 44883.11 | 26556.83 |
| 281.0514 | 37.41983 | 37.3955  | 37.43867 | 7  | 5 | 2 | 46655.53 | 378781.4 | 206479.8 |
| 323.2497 | 32.734   | 32.72983 | 32.76167 | 3  | 0 | 3 | 88107.62 | 346220   | 148152.5 |
| 538.3004 | 9.204633 | 9.101033 | 9.432667 | 6  | 5 | 1 | 1435685  | 3766805  | 2960493  |
| 298.3109 | 29.759   | 29.71617 | 29.7875  | 8  | 3 | 5 | 296098.4 | 257914.4 | 226137.1 |
| 207.0799 | 26.31175 | 26.23883 | 26.32633 | 4  | 1 | 3 | 59173.18 | 97797.96 | 42875.03 |
| 462.3588 | 9.346017 | 9.050317 | 9.460417 | 12 | 4 | 4 | 17987484 | 1949448  | 1003379  |
| 450.1577 | 37.01275 | 36.99183 | 37.02283 | 4  | 0 | 4 | 96021.16 | 350673.5 | 93073.08 |
| 252.1273 | 25.68392 | 25.63817 | 25.7215  | 4  | 4 | 0 | 92201.71 | 246032   | 295563.7 |
| 334.2747 | 16.3274  | 16.25987 | 16.38455 | 8  | 3 | 5 | 808377.3 | 1005352  | 1218555  |
| 425.1351 | 37.00783 | 36.97717 | 37.03467 | 3  | 0 | 3 | 206807.1 | 18729.14 | 14922.22 |
| 277.6023 | 26.14433 | 26.11083 | 26.205   | 6  | 2 | 4 | 312849.4 | 311970   | 422698.5 |
| 676.1535 | 26.23875 | 26.18667 | 26.28233 | 4  | 3 | 1 | 79247.23 | 215895.7 | 256667.3 |
| 336.9295 | 27.67292 | 27.63083 | 27.705   | 6  | 2 | 4 | 208803.6 | 1317862  | 657184.6 |
| 712.1774 | 32.13617 | 32.07333 | 32.20633 | 5  | 1 | 4 | 403189.3 | 377580.9 | 782761.3 |

|          |          |          |          |    |   |   |          |          |          |
|----------|----------|----------|----------|----|---|---|----------|----------|----------|
| 351.197  | 43.60225 | 43.57467 | 43.64517 | 10 | 5 | 5 | 106121.2 | 835650.5 | 558700.1 |
| 363.272  | 10.68373 | 10.63728 | 10.806   | 7  | 4 | 3 | 408623   | 837277.9 | 804899.3 |
| 499.2345 | 11.7754  | 11.72863 | 11.92125 | 3  | 0 | 3 | 2792834  | 37190.56 | 17532.6  |
| 835.0206 | 10.2073  | 10.18403 | 10.21925 | 5  | 2 | 3 | 292918.2 | 109727.9 | 175031.2 |
| 455.3778 | 31.74858 | 31.72517 | 31.77883 | 6  | 2 | 4 | 157371.3 | 223425.4 | 262942.2 |
| 324.2173 | 30.84733 | 30.74683 | 30.88867 | 9  | 4 | 5 | 313999.8 | 2377368  | 1008290  |
| 748.2257 | 41.22167 | 41.16317 | 41.22267 | 5  | 4 | 1 | 87117.37 | 322526.3 | 409925.6 |
| 509.1665 | 29.66617 | 29.57833 | 29.66617 | 5  | 4 | 1 | 69414.64 | 356263.1 | 271746   |
| 224.2012 | 13.48747 | 13.44668 | 13.56747 | 5  | 2 | 3 | 61565.23 | 48710.33 | 38577.99 |
| 331.7574 | 9.534967 | 9.474117 | 9.596683 | 7  | 4 | 3 | 3968869  | 7936290  | 6939637  |
| 462.8516 | 9.392917 | 9.351383 | 9.446567 | 7  | 4 | 3 | 11081822 | 3983802  | 6691142  |
| 338.6038 | 32.11417 | 32.0415  | 32.2235  | 6  | 1 | 5 | 727208.9 | 2666054  | 5910827  |
| 768.1912 | 29.13717 | 29.08283 | 29.2115  | 8  | 3 | 5 | 844742.9 | 2198551  | 3698308  |
| 233.2113 | 33.06183 | 32.99183 | 33.177   | 7  | 2 | 5 | 174343.6 | 234686.2 | 241704.5 |
| 779.5842 | 34.14117 | 34.12717 | 34.148   | 5  | 2 | 3 | 144364.5 | 147384   | 170216.5 |
| 674.5073 | 31.54242 | 31.277   | 31.63033 | 8  | 2 | 5 | 516991   | 298662.7 | 304857.7 |
| 406.3076 | 11.85697 | 11.81297 | 12.02113 | 7  | 2 | 5 | 47175.23 | 112184.3 | 112311.4 |
| 788.2477 | 41.1935  | 41.193   | 41.23733 | 3  | 3 | 0 | 41951.04 | 135468.7 | 185487.5 |
| 393.3114 | 38.8515  | 38.54817 | 39.003   | 5  | 1 | 4 | 50133.41 | 102077   | 29944.38 |
| 314.3424 | 35.44533 | 35.42017 | 35.45717 | 5  | 3 | 2 | 146265.7 | 486330.4 | 621756.2 |
| 320.2437 | 24.22367 | 24.17417 | 24.27317 | 7  | 4 | 3 | 1300986  | 5893238  | 7368553  |
| 270.2796 | 24.64667 | 24.61433 | 24.67567 | 9  | 4 | 5 | 1407896  | 2119871  | 2002519  |
| 732.5485 | 23.8115  | 23.68333 | 23.8955  | 9  | 4 | 5 | 406064.2 | 1852278  | 2430737  |
| 525.45   | 34.44825 | 34.41283 | 34.49633 | 8  | 3 | 5 | 125711.1 | 247679.6 | 234993.5 |
| 219.1747 | 14.98303 | 14.9334  | 15.00973 | 7  | 3 | 4 | 1626991  | 2507680  | 2463124  |
| 440.0662 | 32.12842 | 32.0875  | 32.1605  | 6  | 1 | 5 | 133682.3 | 354483.7 | 787870.5 |
| 490.2073 | 12.86173 | 12.8356  | 12.89353 | 3  | 0 | 3 | 329959.3 | 45455.46 | 82821.8  |
| 469.2453 | 12.29735 | 12.25648 | 12.40345 | 3  | 0 | 3 | 262716.5 | 26122.27 | 15256.18 |
| 708.191  | 29.80517 | 29.76717 | 30.01333 | 9  | 3 | 5 | 212709.6 | 447780.3 | 762176.3 |
| 411.2477 | 11.7754  | 11.77155 | 11.92125 | 3  | 0 | 3 | 811232.4 | 53986.91 | 45968.21 |
| 924.6989 | 9.41895  | 9.33635  | 9.435533 | 5  | 1 | 4 | 1965016  | 342075.2 | 518290.6 |
| 413.2304 | 29.66617 | 29.6075  | 29.7725  | 9  | 4 | 5 | 300790.8 | 391402.8 | 535123.5 |
| 532.3178 | 22.39467 | 22.35967 | 22.42883 | 3  | 0 | 3 | 663660.4 | 110413.1 | 50450.09 |
| 376.7048 | 9.541492 | 9.49235  | 9.571    | 4  | 1 | 3 | 4580800  | 794247.6 | 1137253  |
| 251.9415 | 10.16835 | 10.08757 | 10.24568 | 3  | 0 | 3 | 662100.1 | 311397.1 | 564751.3 |
| 220.1097 | 10.40232 | 10.34782 | 10.44485 | 8  | 5 | 3 | 931374.9 | 1740394  | 2046470  |
| 306.1244 | 21.2435  | 21.0945  | 21.24783 | 3  | 0 | 3 | 832671.6 | 15097.3  | 13716.82 |
| 623.5313 | 11.5928  | 11.5891  | 11.62663 | 5  | 2 | 3 | 152033.1 | 160305.1 | 222374.2 |
| 454.3743 | 31.74583 | 31.72517 | 31.77267 | 9  | 4 | 5 | 760446.3 | 1277388  | 1443787  |
| 438.7879 | 17.76617 | 17.7355  | 17.7955  | 5  | 2 | 3 | 45755.47 | 48830.88 | 56066.97 |
| 397.1626 | 36.99875 | 36.97617 | 37.00783 | 4  | 0 | 4 | 401448.7 | 354216.3 | 181000.4 |
| 342.1089 | 9.469283 | 9.444983 | 9.537367 | 4  | 1 | 3 | 3251472  | 3955876  | 4482972  |
| 213.0779 | 22.75808 | 22.71833 | 22.78383 | 6  | 2 | 4 | 212457.4 | 410479.8 | 248966.2 |
| 614.4843 | 37.31517 | 37.2845  | 37.4135  | 6  | 3 | 3 | 956162   | 1416282  | 1310158  |
| 497.2091 | 21.0525  | 20.98867 | 21.06317 | 3  | 0 | 3 | 106682   | 62517.39 | 35946.01 |
| 300.6337 | 29.22083 | 29.2     | 29.31467 | 8  | 3 | 5 | 929043.1 | 1845122  | 2751653  |
| 451.018  | 25.68617 | 25.63267 | 25.71367 | 5  | 1 | 4 | 115793.9 | 150097.8 | 311520.6 |

|          |          |          |          |    |   |   |          |          |          |
|----------|----------|----------|----------|----|---|---|----------|----------|----------|
| 483.2756 | 23.2845  | 23.23833 | 23.3065  | 3  | 0 | 3 | 172921.1 | 110728.9 | 37447.81 |
| 287.0867 | 10.70263 | 10.60262 | 10.806   | 6  | 2 | 4 | 1213186  | 951298.6 | 1565822  |
| 825.5872 | 9.88495  | 9.832067 | 9.904433 | 5  | 1 | 4 | 845463.8 | 252660.3 | 452881   |
| 374.1656 | 33.15717 | 33.125   | 33.17267 | 3  | 0 | 3 | 100076.4 | 424212.4 | 119429.2 |
| 584.4387 | 9.044033 | 8.937917 | 9.128283 | 4  | 3 | 1 | 373357.8 | 588285.8 | 426872.5 |
| 553.8956 | 28.05133 | 27.98483 | 28.15283 | 10 | 5 | 5 | 179699.3 | 783278.7 | 433707.7 |
| 521.0927 | 23.85492 | 23.85083 | 23.87117 | 4  | 1 | 3 | 50409.2  | 58255.82 | 101008.1 |
| 508.3174 | 22.47083 | 22.4575  | 22.5025  | 3  | 0 | 3 | 1270194  | 229461.8 | 129446.2 |
| 338.2538 | 23.58233 | 23.5705  | 23.60417 | 4  | 1 | 3 | 48590.7  | 113451.4 | 33839.98 |
| 418.1383 | 23.772   | 23.74567 | 23.816   | 3  | 3 | 0 | 59771.55 | 96258.46 | 131702.5 |
| 494.3486 | 17.27867 | 17.254   | 17.308   | 9  | 4 | 5 | 226244.9 | 491855.7 | 440485.1 |
| 694.9257 | 9.709225 | 9.617883 | 9.751083 | 6  | 2 | 4 | 1391627  | 396848   | 616445.8 |
| 724.355  | 43.59125 | 43.57283 | 43.61617 | 4  | 0 | 4 | 80510.66 | 389053.7 | 93294.59 |
| 423.8441 | 10.19385 | 9.970683 | 10.25657 | 10 | 5 | 5 | 1262929  | 1071890  | 1045516  |
| 161.1541 | 10.69263 | 10.63273 | 10.75237 | 5  | 1 | 4 | 286041.1 | 307064.4 | 569093.5 |
| 409.1233 | 31.32867 | 31.301   | 31.34333 | 3  | 0 | 3 | 869552.1 | 52159.84 | 13805.51 |
| 702.9953 | 26.21033 | 26.181   | 26.2615  | 3  | 0 | 3 | 77179.79 | 161240.2 | 182205.6 |
| 275.1274 | 27.47483 | 27.446   | 27.546   | 6  | 2 | 4 | 492799.7 | 1716543  | 2283988  |
| 992.5447 | 37.54583 | 37.516   | 37.58383 | 7  | 5 | 2 | 23179.76 | 98213.29 | 27986.98 |
| 445.1206 | 37.42333 | 37.38067 | 37.47667 | 9  | 5 | 4 | 253799.6 | 2326950  | 1070909  |
| 460.2603 | 15.21587 | 15.2128  | 15.29097 | 3  | 0 | 3 | 518779.5 | 42971.09 | 26886.03 |
| 455.2449 | 14.7864  | 14.77317 | 14.83018 | 3  | 0 | 3 | 416528.5 | 40417.22 | 33216.81 |
| 523.4134 | 11.74128 | 11.68558 | 12.0558  | 9  | 3 | 5 | 106411.8 | 267488.3 | 272697   |
| 730.1811 | 29.06817 | 29.06633 | 29.111   | 3  | 3 | 0 | 73886.78 | 181789.4 | 211689.8 |
| 432.3437 | 10.82177 | 10.76538 | 10.83615 | 5  | 2 | 3 | 301770.3 | 167514   | 233277.1 |
| 736.2342 | 41.22267 | 41.208   | 41.29617 | 5  | 3 | 2 | 57259.15 | 114206.8 | 77604.18 |
| 328.3214 | 41.87783 | 41.84333 | 41.93283 | 9  | 4 | 5 | 406859.4 | 2290885  | 2104569  |
| 613.3881 | 12.08498 | 12.07067 | 12.08525 | 3  | 0 | 3 | 49274.31 | 35452.1  | 24239.84 |
| 701.4947 | 6.36855  | 6.223433 | 6.557917 | 4  | 3 | 1 | 7107768  | 25196238 | 35083939 |
| 624.9581 | 43.44817 | 43.42633 | 43.48533 | 10 | 5 | 5 | 214362.3 | 2335173  | 657039.6 |
| 724.2068 | 32.11917 | 32.07333 | 32.35    | 8  | 2 | 5 | 296995.6 | 677304.9 | 1106383  |
| 204.2365 | 30.79708 | 30.73283 | 30.83517 | 6  | 2 | 4 | 29460.28 | 46928.65 | 63219.67 |
| 680.9798 | 43.07642 | 43.04117 | 43.101   | 10 | 5 | 5 | 183556.8 | 1922767  | 366727.7 |
| 631.4832 | 31.60208 | 31.58383 | 31.63033 | 6  | 2 | 4 | 179789.4 | 62633.15 | 74113.3  |
| 675.5094 | 31.53467 | 31.47917 | 31.56267 | 4  | 1 | 3 | 139747.7 | 66826.56 | 75748.1  |
| 414.2646 | 10.08033 | 10.019   | 10.12338 | 6  | 3 | 3 | 712297.2 | 324090.8 | 258965.5 |
| 249.1635 | 8.65725  | 8.332483 | 8.780433 | 7  | 4 | 3 | 22824746 | 3.74E+08 | 2.37E+08 |
| 526.2404 | 36.44792 | 36.407   | 36.47433 | 4  | 1 | 3 | 128968   | 100770.6 | 93708.51 |
| 372.3477 | 36.71583 | 36.70767 | 36.76867 | 6  | 3 | 3 | 462315.9 | 2072221  | 2462996  |
| 476.961  | 10.95098 | 10.85075 | 10.96525 | 3  | 0 | 3 | 155916   | 19373.79 | 35027.1  |
| 356.1703 | 12.74887 | 12.71698 | 12.84028 | 3  | 0 | 3 | 399543.3 | 23664.69 | 22340.41 |
| 223.0638 | 31.564   | 31.48483 | 31.6035  | 10 | 5 | 5 | 444292.1 | 2436887  | 1339314  |
| 152.0068 | 30.79167 | 30.73283 | 30.8785  | 4  | 0 | 4 | 132033.7 | 163531.8 | 212628.8 |
| 494.3483 | 14.22727 | 14.1769  | 14.25112 | 7  | 2 | 5 | 67879.4  | 117843.2 | 77250.64 |
| 294.1604 | 10.14115 | 10.01733 | 10.2045  | 3  | 0 | 3 | 2051309  | 96861.34 | 112086.5 |
| 219.1746 | 13.15054 | 13.09513 | 13.44572 | 12 | 5 | 5 | 7835867  | 13484646 | 12333189 |
| 392.3458 | 40.75217 | 40.70033 | 40.815   | 6  | 2 | 4 | 39689.58 | 298865.9 | 187988.7 |

|          |          |          |          |    |   |   |          |          |          |
|----------|----------|----------|----------|----|---|---|----------|----------|----------|
| 615.2916 | 21.12583 | 21.023   | 21.13433 | 3  | 0 | 3 | 223153.5 | 30302.78 | 8430.517 |
| 244.2639 | 21.22617 | 21.15667 | 21.27833 | 5  | 2 | 3 | 358978.1 | 682849   | 608757.6 |
| 346.1142 | 25.67708 | 25.6535  | 25.69883 | 6  | 2 | 4 | 161606.8 | 226840.4 | 409949.7 |
| 605.0086 | 18.07392 | 18.0555  | 18.155   | 4  | 1 | 3 | 119575.5 | 267627.9 | 357208.5 |
| 408.283  | 36.5905  | 36.56483 | 36.68117 | 5  | 2 | 3 | 43079.84 | 225773.3 | 118863.7 |
| 281.1108 | 18.12517 | 17.98817 | 18.18667 | 5  | 3 | 2 | 10582468 | 1019307  | 1202226  |
| 281.5289 | 30.80633 | 30.73283 | 30.83517 | 5  | 1 | 4 | 54053.09 | 117590   | 136954.3 |
| 528.3226 | 24.37483 | 24.37383 | 24.3865  | 3  | 0 | 3 | 377196.8 | 269243.4 | 150950.3 |
| 734.2997 | 23.70117 | 23.67733 | 23.73667 | 3  | 0 | 3 | 74443.71 | 8485.652 | 7850.562 |
| 578.3699 | 18.472   | 18.448   | 18.486   | 8  | 4 | 4 | 326448.6 | 482991.6 | 500999.8 |
| 228.2324 | 15.99058 | 15.9643  | 16.0048  | 4  | 1 | 3 | 4163520  | 16695991 | 21751894 |
| 345.9391 | 30.99967 | 30.9075  | 31.0515  | 8  | 4 | 4 | 528879   | 1148062  | 446260.4 |
| 696.3543 | 41.1935  | 41.1635  | 41.25083 | 9  | 4 | 5 | 98551.34 | 601079.9 | 513284   |
| 935.4995 | 10.65101 | 10.63273 | 10.67828 | 4  | 1 | 3 | 1997645  | 1521822  | 2733173  |
| 745.1953 | 29.228   | 29.15567 | 29.31467 | 9  | 3 | 5 | 581665.3 | 1416936  | 2591803  |
| 660.4332 | 31.3185  | 31.301   | 31.34333 | 3  | 0 | 3 | 116239.6 | 77202.56 | 43463.33 |
| 191.0403 | 7.553808 | 7.49685  | 7.613967 | 4  | 3 | 1 | 1111340  | 9101823  | 7241735  |
| 335.2267 | 38.88283 | 38.8755  | 38.94183 | 3  | 0 | 3 | 490588.6 | 106570   | 28469.44 |
| 1020.779 | 44.04692 | 44.0115  | 44.08533 | 8  | 3 | 5 | 2471175  | 352479.6 | 389114.4 |
| 463.3431 | 33.87608 | 33.80817 | 33.924   | 10 | 5 | 5 | 1292839  | 3376317  | 3734963  |
| 608.3711 | 21.4025  | 21.31517 | 21.4345  | 3  | 0 | 3 | 480570.8 | 114516.7 | 46122.3  |
| 360.1827 | 15.12756 | 15.08945 | 15.18693 | 4  | 0 | 4 | 857197.4 | 146939   | 71553.44 |
| 498.4905 | 37.446   | 37.40167 | 37.57683 | 9  | 5 | 4 | 80588.54 | 567291.6 | 354281.9 |
| 1021.782 | 44.04317 | 44.03733 | 44.11483 | 5  | 0 | 5 | 1378046  | 218840.3 | 264169.4 |
| 403.1354 | 26.17858 | 26.14117 | 26.22817 | 10 | 5 | 5 | 256388.6 | 1712356  | 1759249  |
| 536.3495 | 22.27483 | 22.22933 | 22.2965  | 4  | 0 | 4 | 1537297  | 236050   | 86072.5  |
| 554.4485 | 33.85467 | 33.81483 | 33.89017 | 6  | 2 | 4 | 69294.89 | 157501.1 | 145458.7 |
| 668.3484 | 41.193   | 41.16317 | 41.23733 | 5  | 2 | 3 | 147863.3 | 897074.8 | 670639.6 |
| 515.1368 | 23.88067 | 23.86867 | 23.9     | 3  | 0 | 3 | 193850.5 | 421782.6 | 813555.9 |
| 337.1779 | 26.65942 | 26.62017 | 26.68133 | 6  | 3 | 3 | 97007.89 | 297950.9 | 305569.5 |
| 468.3439 | 11.74298 | 11.71578 | 11.93567 | 9  | 4 | 5 | 910712.6 | 2864482  | 2528096  |
| 622.5278 | 11.6028  | 11.58718 | 11.73068 | 8  | 3 | 5 | 461717.3 | 487138.3 | 658458.5 |
| 289.143  | 32.11925 | 32.0855  | 32.19283 | 8  | 3 | 5 | 919088.7 | 3145558  | 6213566  |
| 413.1358 | 33.17183 | 33.125   | 33.1875  | 3  | 0 | 3 | 102333.9 | 15674.82 | 15770.82 |
| 471.1373 | 10.68753 | 10.63755 | 10.82177 | 5  | 4 | 1 | 1186570  | 2313374  | 2511651  |
| 396.0746 | 30.777   | 30.48833 | 30.84967 | 5  | 1 | 4 | 111870   | 325397.6 | 527037.9 |
| 550.3872 | 36.67767 | 36.63717 | 36.932   | 9  | 4 | 5 | 162108.6 | 987520.1 | 854326.9 |
| 828.5199 | 9.464458 | 9.392917 | 9.529483 | 4  | 1 | 3 | 1646849  | 1276254  | 1834117  |
| 720.2113 | 32.13575 | 32.08783 | 32.19283 | 6  | 1 | 5 | 219555.4 | 509444.3 | 838885.8 |
| 587.4249 | 38.52533 | 38.48417 | 38.6405  | 9  | 4 | 5 | 87631.7  | 259474.8 | 253602.7 |
| 447.0152 | 16.937   | 16.893   | 16.94617 | 5  | 1 | 4 | 130554.4 | 153085.8 | 301546.5 |
| 381.5876 | 18.70075 | 18.67017 | 18.80417 | 8  | 3 | 5 | 168197.3 | 297018.6 | 455274   |
| 454.2633 | 23.73683 | 23.71617 | 23.76617 | 4  | 0 | 4 | 3987138  | 11206826 | 15480726 |
| 601.372  | 33.49617 | 33.47733 | 33.50883 | 3  | 0 | 3 | 38238.08 | 35196.69 | 42926.28 |
| 347.1487 | 32.16075 | 32.13133 | 32.18933 | 6  | 5 | 1 | 154711.7 | 595807.1 | 773912.5 |
| 538.3508 | 33.90533 | 33.77783 | 34.03617 | 7  | 4 | 3 | 52477.54 | 226204.9 | 182006.5 |
| 194.5696 | 31.542   | 31.5415  | 31.63433 | 3  | 0 | 3 | 84949.75 | 23305.39 | 43623.28 |

|          |          |          |          |    |   |   |          |          |          |
|----------|----------|----------|----------|----|---|---|----------|----------|----------|
| 326.0977 | 31.01592 | 30.9645  | 31.07383 | 6  | 1 | 5 | 118606.3 | 243806.1 | 531027.6 |
| 412.306  | 31.41708 | 31.37217 | 31.46433 | 10 | 5 | 5 | 569420.4 | 2502678  | 1864891  |
| 465.2954 | 19.763   | 19.73783 | 19.86983 | 3  | 0 | 3 | 193960.6 | 40587.22 | 19138.6  |
| 280.2637 | 39.17867 | 39.11717 | 39.20817 | 3  | 0 | 3 | 32484.21 | 50362.02 | 51799.74 |
| 372.2749 | 23.56733 | 23.55217 | 23.57583 | 4  | 0 | 4 | 187787.2 | 630480.5 | 121303.3 |
| 361.2018 | 10.5154  | 10.34868 | 10.66922 | 6  | 4 | 2 | 855385.1 | 1029582  | 797592.9 |
| 642.4057 | 43.60325 | 43.58733 | 43.75867 | 4  | 3 | 0 | 66861.73 | 317187.6 | 270895.2 |
| 312.6415 | 30.25883 | 30.23183 | 30.36167 | 9  | 4 | 5 | 1987587  | 5105247  | 9556943  |
| 279.1363 | 30.88333 | 30.763   | 30.93717 | 4  | 1 | 3 | 725386.6 | 1718870  | 1592824  |
| 401.0358 | 17.14125 | 17.02267 | 17.19167 | 4  | 1 | 3 | 251650.7 | 149561   | 277905.7 |
| 223.0641 | 15.66928 | 15.5829  | 15.6839  | 5  | 2 | 3 | 96514.8  | 856305.3 | 485800.4 |
| 403.1571 | 32.69683 | 32.66933 | 32.69867 | 3  | 0 | 3 | 65584.8  | 205431.8 | 44412.12 |
| 394.8866 | 32.32425 | 32.23883 | 32.365   | 6  | 1 | 5 | 2019795  | 20093.13 | 41556.76 |
| 826.5031 | 9.938475 | 9.858417 | 9.948533 | 4  | 1 | 3 | 377835.9 | 190500.1 | 294360.9 |
| 394.3682 | 33.51475 | 33.4565  | 33.5395  | 8  | 3 | 5 | 83610.45 | 206695.7 | 199876.6 |
| 750.224  | 41.20783 | 41.1935  | 41.25217 | 3  | 3 | 0 | 48910.93 | 144950.6 | 189606.4 |
| 509.1239 | 38.11967 | 38.0895  | 38.22983 | 4  | 1 | 3 | 33239.2  | 39785.16 | 73286.43 |
| 440.4103 | 38.79033 | 38.77633 | 38.899   | 7  | 4 | 3 | 101240.6 | 346636.8 | 198610.3 |
| 884.5965 | 29.72925 | 29.70933 | 29.76817 | 10 | 5 | 5 | 227558.9 | 2154752  | 417677   |
| 441.8316 | 33.96275 | 33.869   | 33.99433 | 10 | 5 | 5 | 616826.9 | 1334079  | 1460528  |
| 301.0764 | 16.20485 | 16.1947  | 16.21947 | 3  | 0 | 3 | 114968.2 | 103171.3 | 82681.71 |
| 731.1336 | 10.67897 | 10.62147 | 10.78962 | 7  | 3 | 4 | 476873.9 | 747294.3 | 977007.2 |
| 503.1719 | 29.6395  | 29.57833 | 29.65167 | 6  | 2 | 4 | 89191.82 | 183964.5 | 316772.6 |
| 425.2633 | 13.91909 | 13.91268 | 13.9571  | 4  | 0 | 4 | 1387157  | 25546.16 | 22015.23 |
| 332.1498 | 23.58183 | 23.50217 | 23.60533 | 9  | 4 | 5 | 127070.3 | 537707.8 | 475443.4 |
| 375.3111 | 38.65258 | 38.6095  | 38.76517 | 10 | 5 | 5 | 681227.8 | 5863517  | 3264938  |
| 667.4796 | 43.20267 | 43.1835  | 43.21833 | 10 | 5 | 5 | 2289691  | 32942513 | 8626126  |
| 681.5009 | 10.46588 | 10.36523 | 10.49625 | 6  | 3 | 3 | 1502916  | 2860041  | 2508503  |
| 508.0721 | 23.84017 | 23.83583 | 23.85583 | 5  | 1 | 4 | 83748.94 | 127525.9 | 273456.1 |
| 516.3227 | 24.61633 | 24.6095  | 24.6205  | 3  | 0 | 3 | 270597.4 | 103563.5 | 29297.56 |
| 746.2065 | 30.89133 | 30.84933 | 30.9455  | 6  | 1 | 5 | 362846.2 | 758560.1 | 1596550  |
| 291.2517 | 14.93588 | 14.91862 | 15.01628 | 7  | 3 | 4 | 103277.7 | 233241.2 | 262666.1 |
| 303.6307 | 29.21517 | 29.18517 | 29.31467 | 9  | 5 | 4 | 276234.6 | 1165907  | 1142116  |
| 505.2351 | 16.32922 | 16.31667 | 16.3492  | 3  | 0 | 3 | 523783   | 37778.47 | 49784.36 |
| 436.1713 | 37.00642 | 36.94767 | 37.03517 | 4  | 0 | 4 | 56031.41 | 170178.8 | 36261.19 |
| 574.8535 | 22.10767 | 22.09383 | 22.20633 | 3  | 0 | 3 | 67177.6  | 160973.2 | 315471.4 |
| 341.7675 | 12.71343 | 12.65432 | 12.78712 | 9  | 4 | 5 | 648144.1 | 1401246  | 1702820  |
| 464.2917 | 19.763   | 19.73783 | 19.8525  | 3  | 0 | 3 | 762450   | 152312.7 | 82141.15 |
| 495.1517 | 10.68843 | 10.6177  | 10.7931  | 6  | 2 | 4 | 955194.6 | 1027813  | 1899689  |
| 786.2523 | 41.21517 | 41.1935  | 41.23617 | 4  | 3 | 1 | 96388.45 | 331262.2 | 389133.8 |
| 1038.747 | 9.482133 | 9.444983 | 9.584433 | 6  | 3 | 3 | 5456949  | 7052401  | 6843093  |
| 567.4154 | 30.24533 | 30.24433 | 30.25    | 3  | 3 | 0 | 25248.89 | 64179.77 | 79552.54 |
| 430.2226 | 10.39097 | 10.34782 | 10.44485 | 7  | 2 | 5 | 1417309  | 1217575  | 1839279  |
| 219.0315 | 2.090058 | 2.004783 | 2.338217 | 4  | 0 | 4 | 207955.7 | 0        | 0        |
| 261.6178 | 26.23142 | 26.12917 | 26.30383 | 8  | 2 | 5 | 204722.7 | 375008.3 | 592230   |
| 478.2344 | 12.39988 | 12.32825 | 12.49625 | 3  | 0 | 3 | 348189.6 | 8317.033 | 9218.848 |
| 497.4191 | 32.19942 | 32.16167 | 32.26167 | 4  | 1 | 3 | 101044.2 | 43974.35 | 36724.09 |

|          |          |          |          |    |   |   |          |          |          |
|----------|----------|----------|----------|----|---|---|----------|----------|----------|
| 418.0252 | 19.4445  | 19.423   | 19.46717 | 4  | 1 | 3 | 84266.44 | 38560.44 | 67250.97 |
| 350.2692 | 37.0055  | 36.96233 | 37.00783 | 4  | 0 | 4 | 214351.5 | 622098.3 | 562552.5 |
| 473.0592 | 32.13533 | 32.0875  | 32.1585  | 5  | 1 | 4 | 186506.4 | 159059.7 | 309566.7 |
| 469.1312 | 23.19067 | 23.16617 | 23.21033 | 6  | 2 | 4 | 94268.99 | 171122.4 | 301516.5 |
| 766.619  | 10.08869 | 10.08285 | 10.1147  | 4  | 1 | 3 | 168150.9 | 159260.5 | 286680.7 |
| 483.0882 | 32.146   | 32.07267 | 32.20367 | 7  | 2 | 5 | 810512.8 | 1987616  | 4246963  |
| 297.0829 | 31.56475 | 31.48483 | 31.58833 | 10 | 5 | 5 | 405954.3 | 2204031  | 1247720  |
| 646.9711 | 43.31542 | 43.27817 | 43.3665  | 10 | 5 | 5 | 211001.2 | 2461115  | 719995   |
| 507.4913 | 30.99417 | 30.97967 | 31.0085  | 3  | 0 | 3 | 80192.38 | 130444.4 | 284306.7 |
| 542.4267 | 31.69658 | 31.66867 | 31.719   | 8  | 3 | 5 | 987243.9 | 800586.5 | 855573.7 |
| 441.0417 | 22.11492 | 22.02367 | 22.21567 | 10 | 4 | 5 | 2406071  | 8064664  | 15596154 |
| 366.2233 | 9.553275 | 9.4881   | 9.626317 | 8  | 5 | 3 | 63957780 | 86906442 | 1.35E+08 |
| 756.1802 | 29.228   | 29.15483 | 29.2755  | 7  | 5 | 2 | 114045.2 | 544508.4 | 471669.6 |
| 408.3687 | 40.75467 | 40.73017 | 40.8145  | 8  | 3 | 5 | 116691   | 457529.1 | 307524.8 |
| 441.3299 | 33.9625  | 33.8905  | 33.99433 | 10 | 5 | 5 | 1318942  | 3186109  | 3512624  |
| 704.1668 | 27.459   | 27.441   | 27.47783 | 4  | 3 | 1 | 89564.03 | 457398.1 | 560767.8 |
| 600.2978 | 26.57117 | 26.56017 | 26.58533 | 3  | 0 | 3 | 262961.8 | 195903   | 93786.05 |
| 377.0893 | 14.56693 | 14.54208 | 14.6224  | 3  | 0 | 3 | 417086   | 17918.47 | 28635.04 |
| 579.2936 | 30.474   | 30.34733 | 30.50117 | 5  | 3 | 2 | 4444218  | 18779185 | 24402619 |
| 586.4532 | 31.644   | 31.6035  | 31.69533 | 11 | 5 | 5 | 700326.6 | 531626.6 | 602493.6 |
| 384.1824 | 13.10817 | 13.08047 | 13.15022 | 3  | 0 | 3 | 990503.9 | 29849.98 | 22601.63 |
| 452.3614 | 9.544758 | 9.49235  | 9.6125   | 8  | 5 | 3 | 6643725  | 16606700 | 11560627 |
| 779.1847 | 29.1255  | 29.11167 | 29.15567 | 3  | 3 | 0 | 65937.55 | 129966.6 | 141993.2 |
| 590.9915 | 32.40367 | 32.37967 | 32.4975  | 3  | 0 | 3 | 60192    | 49898.02 | 106177.3 |
| 737.4362 | 9.45735  | 9.278167 | 9.563383 | 3  | 0 | 3 | 1599709  | 437197.3 | 590269   |
| 552.0724 | 31.34333 | 31.32933 | 31.35767 | 3  | 0 | 3 | 201654.9 | 64575.74 | 31625.21 |
| 411.3055 | 34.05167 | 34.02067 | 34.24883 | 8  | 3 | 4 | 240742.9 | 465673   | 521886.2 |
| 636.311  | 23.5225  | 23.477   | 23.54467 | 3  | 0 | 3 | 158091.4 | 88711.36 | 56293.12 |
| 334.2461 | 38.67683 | 38.67617 | 38.68117 | 3  | 0 | 3 | 458140.5 | 2655238  | 535726.6 |
| 273.1832 | 32.41583 | 32.39533 | 32.51217 | 5  | 1 | 4 | 11536834 | 27133055 | 40073441 |
| 353.2887 | 13.87414 | 13.8378  | 13.88765 | 6  | 2 | 4 | 75138.61 | 135317.5 | 174531.1 |
| 419.8186 | 34.03867 | 33.95183 | 34.07833 | 10 | 5 | 5 | 596381.6 | 1014376  | 1153941  |
| 342.1918 | 21.41742 | 21.31517 | 21.44917 | 8  | 3 | 5 | 6242794  | 22662489 | 34602726 |
| 488.9441 | 25.6825  | 25.66283 | 25.71367 | 5  | 1 | 4 | 67418.2  | 148722.9 | 318357.4 |
| 388.7905 | 34.13417 | 34.08883 | 34.14333 | 9  | 4 | 5 | 349570.6 | 757351.9 | 878184.1 |
| 420.2285 | 11.61943 | 11.61482 | 11.7604  | 3  | 0 | 3 | 3247506  | 23919    | 20065.25 |
| 758.6617 | 9.529483 | 9.506667 | 9.626317 | 5  | 1 | 3 | 17378666 | 1035552  | 1103341  |
| 374.6058 | 28.92183 | 28.8925  | 29.01733 | 7  | 3 | 4 | 98064.74 | 178272   | 204786.9 |
| 502.9269 | 18.155   | 18.153   | 18.21917 | 3  | 0 | 3 | 70644.26 | 281935.3 | 336359.7 |
| 879.4919 | 9.180183 | 9.08515  | 9.266617 | 6  | 3 | 3 | 18035672 | 3165383  | 3983160  |
| 473.1105 | 14.07078 | 14.06243 | 14.13205 | 3  | 0 | 3 | 147354.2 | 18005.02 | 30493.95 |
| 479.822  | 2.114383 | 2.0466   | 2.126033 | 3  | 0 | 3 | 201001.5 | 0        | 0        |
| 634.4536 | 29.37533 | 29.283   | 29.4335  | 3  | 0 | 3 | 44747.37 | 30890.56 | 19020.16 |
| 419.3168 | 34.04242 | 34.03583 | 34.07833 | 6  | 2 | 4 | 1189175  | 3968100  | 3044983  |
| 292.6384 | 32.10483 | 32.07183 | 32.2235  | 8  | 4 | 4 | 253791.2 | 1328955  | 1304401  |
| 762.559  | 31.42833 | 31.416   | 31.44933 | 5  | 2 | 3 | 205494.6 | 79115.15 | 81961.85 |
| 568.735  | 42.28267 | 42.22867 | 42.34817 | 6  | 2 | 4 | 56654.8  | 458225   | 76009.52 |

|          |          |          |          |    |   |   |          |          |          |
|----------|----------|----------|----------|----|---|---|----------|----------|----------|
| 592.3755 | 22.40983 | 22.39217 | 22.42883 | 3  | 0 | 3 | 558707.5 | 67203.93 | 25984.14 |
| 624.2685 | 29.17717 | 29.09717 | 29.2115  | 5  | 2 | 3 | 81648.97 | 214927.2 | 188701.1 |
| 707.9769 | 9.518825 | 9.444983 | 9.584433 | 6  | 3 | 3 | 1.52E+08 | 1.36E+08 | 2.45E+08 |
| 398.0197 | 22.10083 | 22.00883 | 22.21567 | 9  | 3 | 5 | 763568.2 | 2299356  | 4467505  |
| 588.2645 | 32.10967 | 32.10167 | 32.144   | 4  | 4 | 0 | 128860   | 761854.6 | 976390.4 |
| 244.2638 | 23.18817 | 23.15183 | 23.24467 | 10 | 5 | 5 | 1605952  | 3288742  | 2846723  |
| 848.418  | 41.19317 | 41.16333 | 41.23617 | 3  | 0 | 3 | 55304.26 | 32942.6  | 32856.53 |
| 336.2607 | 27.66333 | 27.45633 | 27.7845  | 11 | 5 | 5 | 1025040  | 5946384  | 6074111  |
| 213.1026 | 14.97753 | 14.9342  | 14.98237 | 3  | 0 | 3 | 2023261  | 395363.7 | 218158.7 |
| 267.096  | 12.85362 | 12.76328 | 12.85795 | 3  | 0 | 3 | 319306.3 | 234202.9 | 311233.5 |
| 337.1457 | 18.1235  | 18.06983 | 18.14    | 3  | 0 | 3 | 830713.7 | 33138.69 | 23403.93 |
| 750.1688 | 26.8875  | 26.849   | 26.89733 | 4  | 3 | 1 | 55463.88 | 123527.9 | 157104.3 |
| 530.9586 | 25.689   | 25.64683 | 25.71517 | 5  | 1 | 4 | 45975.77 | 85519.75 | 177010.1 |
| 454.1617 | 20.54117 | 20.54    | 20.66717 | 3  | 0 | 3 | 1733153  | 3283039  | 4281038  |
| 705.4888 | 33.18    | 33.15733 | 33.21733 | 4  | 1 | 3 | 89441.23 | 159861.9 | 182448   |
| 593.3413 | 30.25883 | 30.23533 | 30.32083 | 7  | 5 | 2 | 244112.2 | 803446.5 | 975527.6 |
| 495.0233 | 42.84725 | 42.8015  | 42.88067 | 10 | 5 | 5 | 167681.3 | 1636239  | 371942.3 |
| 382.3681 | 36.93333 | 36.90833 | 37.12783 | 10 | 5 | 5 | 133170.6 | 441461.8 | 348266.4 |
| 339.6039 | 32.13617 | 32.07083 | 32.20817 | 5  | 1 | 4 | 235615.5 | 678794.5 | 1420138  |
| 529.3606 | 10.1728  | 10.12773 | 10.1894  | 5  | 1 | 4 | 76763.91 | 91507.25 | 92310.07 |
| 558.0881 | 25.90925 | 25.89617 | 25.9325  | 6  | 2 | 4 | 148579.3 | 343021   | 692187.5 |
| 308.2705 | 9.184917 | 9.101033 | 9.294367 | 6  | 4 | 2 | 1254912  | 2310639  | 1645924  |
| 320.2438 | 24.856   | 24.83167 | 24.88917 | 9  | 5 | 4 | 2084117  | 8401420  | 10875910 |
| 383.0561 | 19.588   | 19.54383 | 19.67717 | 6  | 2 | 4 | 57490.26 | 67311.92 | 109474.1 |
| 748.5798 | 12.3989  | 12.3356  | 12.50992 | 9  | 4 | 5 | 393380.6 | 1174230  | 1117341  |
| 267.0795 | 13.63873 | 13.44543 | 13.76545 | 12 | 5 | 5 | 1535486  | 6134807  | 10172184 |
| 413.1927 | 18.64592 | 18.6355  | 18.67533 | 4  | 3 | 1 | 392900.2 | 561186.5 | 820556.8 |
| 460.0732 | 22.1235  | 22.10767 | 22.14983 | 3  | 0 | 3 | 54759.99 | 48638.22 | 70115.05 |
| 508.1659 | 10.66922 | 10.56983 | 10.77118 | 9  | 4 | 5 | 1365760  | 2769701  | 4100165  |
| 522.4102 | 11.72784 | 11.68558 | 11.7652  | 8  | 4 | 4 | 983063.4 | 2776332  | 2605792  |
| 289.1542 | 27.14608 | 27.11983 | 27.20883 | 4  | 3 | 1 | 123875.5 | 495886   | 486355.6 |
| 665.4215 | 10.0778  | 10.05612 | 10.10067 | 5  | 2 | 3 | 153598.1 | 99965.99 | 149327.3 |
| 373.1401 | 21.44717 | 21.3425  | 21.46    | 5  | 3 | 2 | 192130.8 | 619847.9 | 796742.4 |
| 245.2675 | 22.08983 | 22.005   | 22.1215  | 6  | 3 | 3 | 212783.2 | 332191.5 | 265154.7 |
| 470.3595 | 15.2318  | 15.15705 | 15.31638 | 9  | 4 | 5 | 138720.7 | 572088.2 | 545944.2 |
| 506.4326 | 16.64479 | 16.5765  | 16.68333 | 6  | 2 | 4 | 52857.87 | 97199.93 | 97889.11 |
| 279.0857 | 30.83533 | 30.82083 | 30.84967 | 3  | 0 | 3 | 766936.2 | 1838210  | 1840499  |
| 305.5697 | 28.429   | 28.38633 | 28.46717 | 4  | 1 | 3 | 88104.45 | 55913.49 | 61008.45 |
| 381.1257 | 32.51217 | 32.41883 | 32.56617 | 7  | 4 | 3 | 184102.6 | 597751.8 | 739367.3 |
| 551.3955 | 33.5855  | 33.50783 | 33.64    | 9  | 4 | 5 | 602585.8 | 2050904  | 2150729  |
| 510.4004 | 37.93167 | 37.88767 | 38.01767 | 9  | 4 | 5 | 82863.13 | 316062.4 | 308049   |
| 1187.857 | 43.59542 | 43.4705  | 43.63067 | 6  | 2 | 3 | 71931.08 | 257657.8 | 219584.4 |
| 543.2145 | 11.68208 | 11.65747 | 11.83458 | 3  | 0 | 3 | 1162806  | 20360.91 | 23706.5  |
| 377.1052 | 28.1375  | 28.04433 | 28.162   | 7  | 2 | 5 | 620561.4 | 1631192  | 2390274  |
| 442.0617 | 32.1285  | 32.0875  | 32.146   | 6  | 1 | 5 | 1434928  | 4118144  | 9009566  |
| 259.1099 | 20.6845  | 20.67083 | 20.69783 | 3  | 0 | 3 | 470261.3 | 18236.95 | 8380.078 |
| 671.8691 | 9.54735  | 9.444983 | 9.596683 | 6  | 4 | 2 | 1628938  | 1763341  | 854221   |



|          |          |          |          |    |   |   |          |          |          |
|----------|----------|----------|----------|----|---|---|----------|----------|----------|
| 536.2472 | 23.58883 | 23.58183 | 23.6005  | 3  | 0 | 3 | 237005.6 | 338986   | 44453.58 |
| 349.1527 | 28.23083 | 28.20517 | 28.23817 | 5  | 1 | 4 | 127577.7 | 112878.3 | 129199   |
| 340.6017 | 32.11483 | 32.10233 | 32.19283 | 5  | 1 | 4 | 67199.45 | 208756.5 | 445740.3 |
| 291.072  | 22.13133 | 22.03667 | 22.1365  | 6  | 2 | 4 | 1235374  | 2540522  | 3445832  |
| 357.1852 | 19.35817 | 19.32383 | 19.3935  | 6  | 4 | 2 | 54613.38 | 270080   | 132546.4 |
| 778.1823 | 29.12492 | 29.09717 | 29.13483 | 6  | 4 | 2 | 120861.6 | 349520.2 | 365019.4 |
| 496.4155 | 32.20417 | 32.17667 | 32.2655  | 7  | 3 | 4 | 294262.9 | 196044.4 | 175900.9 |
| 568.3384 | 30.84325 | 30.81667 | 30.95983 | 6  | 4 | 2 | 364388.8 | 1264059  | 1469006  |
| 331.1554 | 9.47815  | 9.341517 | 9.537367 | 3  | 0 | 3 | 2563771  | 435522.1 | 493304.7 |
| 362.5961 | 29.14083 | 29.09717 | 29.2115  | 7  | 2 | 5 | 166903.4 | 315205.4 | 630604.1 |
| 696.1906 | 30.01767 | 30.01333 | 30.11717 | 5  | 2 | 3 | 708407.3 | 1398289  | 2662927  |
| 320.1907 | 22.14442 | 22.05267 | 22.201   | 6  | 3 | 3 | 100832   | 339113.4 | 209985.9 |
| 752.5172 | 29.82258 | 29.79967 | 29.84117 | 10 | 5 | 5 | 1849694  | 17260445 | 3413462  |
| 350.596  | 29.228   | 29.18433 | 29.31467 | 7  | 2 | 5 | 295674.1 | 736982.8 | 1459919  |
| 728.6147 | 9.455275 | 9.43065  | 9.537367 | 4  | 1 | 3 | 3919133  | 1458897  | 2987122  |
| 579.3734 | 18.46142 | 18.448   | 18.4845  | 6  | 3 | 3 | 87985.36 | 130786.9 | 152096.3 |
| 531.9662 | 25.68433 | 25.64683 | 25.71367 | 6  | 1 | 5 | 110876.9 | 228751   | 485089.8 |
| 507.871  | 33.72867 | 33.64533 | 33.78267 | 10 | 5 | 5 | 514237.2 | 1447042  | 1651792  |
| 208.8911 | 6.810033 | 6.614583 | 6.8313   | 3  | 3 | 0 | 865278.9 | 9266517  | 11157229 |
| 292.2641 | 17.884   | 17.88083 | 17.94167 | 5  | 2 | 3 | 166044.6 | 163876.5 | 179793.4 |
| 349.1479 | 32.175   | 32.144   | 32.19283 | 5  | 4 | 1 | 96123.66 | 325491.4 | 430133   |
| 689.4929 | 43.06883 | 43.05483 | 43.08617 | 10 | 5 | 5 | 1675717  | 23023080 | 6841965  |
| 791.5282 | 21.04308 | 20.96633 | 21.0505  | 4  | 1 | 3 | 42237.36 | 37352.04 | 43589.57 |
| 346.2381 | 32.708   | 32.62083 | 32.73083 | 7  | 3 | 4 | 106294   | 607787.3 | 438045   |
| 906.7013 | 40.97875 | 40.82    | 41.07417 | 4  | 0 | 3 | 349867.3 | 57222.14 | 68607.69 |
| 992.6792 | 30.9415  | 30.922   | 31.088   | 8  | 5 | 3 | 904155.4 | 2289692  | 2879506  |
| 878.5452 | 10.29373 | 10.26028 | 10.30798 | 3  | 0 | 3 | 200575   | 74460.15 | 106352.3 |
| 951.4604 | 10.77893 | 10.76447 | 10.78352 | 3  | 0 | 3 | 456661.3 | 221084.2 | 441176.9 |
| 444.2653 | 20.15467 | 20.13567 | 20.28383 | 3  | 0 | 3 | 208470   | 80314.56 | 12826.42 |
| 518.1865 | 10.69302 | 10.65117 | 10.77118 | 6  | 3 | 3 | 1646393  | 3317654  | 5805132  |
| 391.0026 | 21.711   | 21.63667 | 21.71283 | 3  | 0 | 3 | 1088444  | 4330525  | 5879141  |
| 456.0606 | 25.67708 | 25.63383 | 25.69883 | 6  | 1 | 5 | 243771.2 | 463191   | 1013362  |
| 718.5324 | 31.49383 | 31.48483 | 31.50383 | 7  | 2 | 5 | 331587.2 | 211800.1 | 202905.9 |
| 378.2646 | 21.52242 | 21.39833 | 21.53317 | 6  | 2 | 4 | 83499.55 | 129774.9 | 179345.8 |
| 324.0897 | 16.43977 | 16.38258 | 16.67783 | 4  | 1 | 3 | 266004.2 | 515857.3 | 848893.9 |
| 424.2599 | 13.91351 | 13.90905 | 13.9424  | 4  | 0 | 4 | 5002027  | 87810.52 | 87373.06 |
| 909.6573 | 33.877   | 33.8725  | 33.924   | 7  | 3 | 4 | 838142.9 | 1214351  | 1384099  |
| 316.1761 | 20.029   | 19.99067 | 20.09067 | 4  | 1 | 3 | 52622.36 | 184187.7 | 167522.8 |
| 513.2946 | 25.86233 | 25.82283 | 25.87367 | 3  | 0 | 3 | 73749.45 | 34582.67 | 12332.79 |
| 196.0954 | 10.9696  | 10.86645 | 11.00872 | 3  | 0 | 3 | 1251096  | 218211.8 | 213183   |
| 552.4508 | 9.536167 | 9.460417 | 9.64025  | 8  | 4 | 3 | 4542652  | 10409451 | 9669416  |
| 595.9236 | 33.44417 | 33.40167 | 33.51067 | 9  | 5 | 4 | 219099.9 | 662391.1 | 691587.4 |
| 213.1787 | 9.515    | 9.473767 | 9.596683 | 9  | 5 | 4 | 6159599  | 15095140 | 11725811 |
| 397.2014 | 31.49383 | 31.41417 | 31.55583 | 5  | 2 | 3 | 72228.1  | 438978.7 | 271640.1 |
| 481.3482 | 32.28017 | 32.21783 | 32.39533 | 7  | 4 | 3 | 125937.8 | 584037   | 588942.5 |
| 372.0203 | 22.14467 | 22.09383 | 22.16517 | 5  | 1 | 4 | 125340.4 | 357815.8 | 531185.8 |
| 530.3854 | 33.692   | 33.65567 | 33.71167 | 5  | 2 | 3 | 125979.2 | 404080.1 | 345340.5 |

|          |          |          |          |    |   |   |          |          |          |
|----------|----------|----------|----------|----|---|---|----------|----------|----------|
| 227.1762 | 9.474117 | 9.187083 | 9.537367 | 7  | 4 | 3 | 19232762 | 56825374 | 39292669 |
| 654.3327 | 43.58    | 43.55567 | 43.6355  | 4  | 3 | 1 | 1438270  | 2992303  | 2875405  |
| 337.1579 | 32.146   | 32.0875  | 32.176   | 10 | 5 | 5 | 2680178  | 8539386  | 15503024 |
| 709.6698 | 9.4622   | 9.43065  | 9.537367 | 4  | 1 | 3 | 5323020  | 995754.5 | 1698250  |
| 821.6043 | 34.03867 | 33.98233 | 34.07833 | 10 | 5 | 5 | 2235264  | 3621041  | 4027072  |
| 229.0753 | 18.11417 | 18.08433 | 18.17483 | 8  | 5 | 3 | 62226.18 | 353340.8 | 183287.6 |
| 529.1299 | 23.94433 | 23.929   | 23.95733 | 3  | 0 | 3 | 158376.4 | 17100.96 | 30983.12 |
| 505.2358 | 19.18817 | 19.13767 | 19.19083 | 3  | 0 | 3 | 216521.5 | 13647.66 | 10425.16 |
| 735.1653 | 29.24233 | 29.228   | 29.35833 | 3  | 0 | 3 | 149471.3 | 62836.65 | 108840.9 |
| 385.121  | 32.52517 | 32.4985  | 32.55117 | 3  | 3 | 0 | 59975.44 | 159734.5 | 229360.2 |
| 550.1314 | 22.136   | 22.03667 | 22.1715  | 5  | 2 | 3 | 88191.59 | 104505.3 | 145204.2 |
| 175.5348 | 15.5826  | 15.5246  | 15.64342 | 4  | 1 | 3 | 51685.19 | 138593.6 | 235335.9 |
| 615.574  | 9.547417 | 9.537367 | 9.6125   | 4  | 1 | 3 | 1950894  | 756039.6 | 1607514  |
| 391.3421 | 40.7595  | 40.73017 | 40.83    | 10 | 5 | 5 | 107561.4 | 511679.6 | 395944.1 |
| 397.3626 | 11.02708 | 10.95727 | 11.04087 | 7  | 3 | 4 | 192654.5 | 455556.2 | 582339.5 |
| 279.2092 | 30.81158 | 30.74767 | 30.89283 | 6  | 2 | 4 | 57593264 | 1.21E+08 | 1.85E+08 |
| 525.1222 | 32.116   | 32.05783 | 32.146   | 4  | 1 | 3 | 96285.8  | 343348.3 | 357100.4 |
| 480.9106 | 25.6925  | 25.65317 | 25.7185  | 4  | 1 | 3 | 117897.4 | 54064.09 | 115457   |
| 371.307  | 10.4129  | 10.37933 | 10.43838 | 6  | 2 | 4 | 286737.4 | 874394.5 | 738771   |
| 337.606  | 32.18525 | 32.05633 | 32.2235  | 4  | 1 | 3 | 87982.89 | 237064.8 | 523359.2 |
| 499.4037 | 31.7265  | 31.711   | 31.749   | 7  | 2 | 5 | 200639.9 | 249630.4 | 282772   |
| 534.3496 | 9.322017 | 9.30105  | 9.337217 | 7  | 3 | 4 | 3848828  | 2173055  | 2215455  |
| 234.0468 | 13.71351 | 13.62433 | 13.76397 | 4  | 3 | 1 | 176755.5 | 1040257  | 876116.5 |
| 327.2366 | 14.81522 | 14.77322 | 14.92205 | 9  | 4 | 5 | 84521.53 | 250593.8 | 240188.3 |
| 453.1269 | 9.22575  | 9.10085  | 9.266617 | 7  | 3 | 3 | 5767404  | 4688882  | 3550280  |
| 820.6009 | 34.03867 | 33.967   | 34.07833 | 10 | 5 | 5 | 4878584  | 9005021  | 9966416  |
| 485.356  | 33.803   | 33.7375  | 33.94483 | 9  | 5 | 4 | 1104508  | 3231045  | 3728635  |
| 331.8518 | 9.475958 | 9.460417 | 9.537367 | 4  | 1 | 3 | 5848358  | 1420300  | 2783975  |
| 772.3576 | 22.29183 | 22.28917 | 22.31933 | 3  | 3 | 0 | 243171.5 | 785080.3 | 1172941  |
| 409.1756 | 23.0165  | 22.95767 | 23.05333 | 7  | 3 | 4 | 107315.6 | 110317.3 | 92478.63 |
| 270.0257 | 13.36306 | 13.22485 | 13.51647 | 10 | 5 | 5 | 336217.1 | 1267426  | 1487358  |
| 460.3428 | 21.51942 | 21.38433 | 21.54467 | 8  | 3 | 5 | 342741.6 | 842060.9 | 892919.7 |
| 506.2553 | 9.168508 | 9.161067 | 9.231383 | 4  | 3 | 1 | 1907762  | 1024492  | 535078.5 |
| 410.0821 | 30.80633 | 30.74683 | 30.83517 | 3  | 0 | 3 | 239524.7 | 69138.07 | 118611.8 |
| 364.2029 | 15.02162 | 15.01275 | 15.08275 | 3  | 0 | 3 | 298495.5 | 231795.4 | 129621.1 |
| 229.1952 | 26.05033 | 26.048   | 26.12933 | 5  | 3 | 2 | 122866.4 | 423691.9 | 501995.5 |
| 702.9413 | 9.898067 | 9.793617 | 9.946383 | 6  | 2 | 4 | 501643.2 | 241733.9 | 343556.2 |
| 455.2294 | 12.72005 | 12.70247 | 12.78712 | 3  | 0 | 3 | 255291.5 | 24375.88 | 17061.93 |
| 317.1152 | 30.48758 | 30.41067 | 30.52683 | 4  | 3 | 1 | 977622.3 | 5155618  | 5647119  |
| 754.1822 | 29.2135  | 29.16983 | 29.2865  | 7  | 4 | 3 | 139626.8 | 645700   | 566358.1 |
| 564.2511 | 21.657   | 21.557   | 21.68367 | 3  | 0 | 3 | 350881.8 | 142235.4 | 80748.31 |
| 357.1547 | 14.11493 | 14.10308 | 14.17657 | 3  | 0 | 3 | 216615.3 | 39320.75 | 21360.26 |
| 533.3211 | 22.39467 | 22.37583 | 22.44367 | 3  | 0 | 3 | 208399.3 | 62002.92 | 29977.55 |
| 312.0299 | 30.9935  | 30.9495  | 31.06583 | 7  | 2 | 5 | 163369.3 | 382986.9 | 779597.6 |
| 278.2695 | 28.21433 | 28.1905  | 28.235   | 4  | 3 | 1 | 63200.89 | 223980.1 | 253265.6 |
| 312.2175 | 11.48663 | 11.42127 | 11.73068 | 8  | 4 | 4 | 535116.3 | 2133587  | 2030611  |
| 445.3181 | 20.12067 | 20.10683 | 20.28383 | 7  | 3 | 4 | 317516.8 | 391540   | 549029.3 |

|          |          |          |          |    |   |   |          |          |          |
|----------|----------|----------|----------|----|---|---|----------|----------|----------|
| 403.2709 | 10.42227 | 10.37933 | 10.45412 | 9  | 4 | 5 | 22248046 | 68201906 | 89352212 |
| 441.1615 | 37.02083 | 37.00533 | 37.02283 | 4  | 0 | 4 | 139863.6 | 332928.3 | 190928.1 |
| 219.1746 | 30.51792 | 30.4895  | 30.56083 | 6  | 2 | 4 | 375711   | 547020.6 | 466007.1 |
| 622.2815 | 32.11692 | 32.08783 | 32.20817 | 10 | 5 | 5 | 1269444  | 2726507  | 3725610  |
| 470.3427 | 8.979458 | 8.87615  | 9.163733 | 4  | 3 | 0 | 608940.6 | 1440495  | 1322767  |
| 551.8972 | 33.58317 | 33.57067 | 33.64    | 7  | 3 | 4 | 365806.1 | 1061845  | 1129940  |
| 366.1926 | 38.12175 | 38.08367 | 38.21533 | 8  | 3 | 5 | 191469.3 | 614894.1 | 529068.6 |
| 349.168  | 9.507758 | 9.444983 | 9.571    | 4  | 1 | 3 | 4523168  | 2120951  | 2681920  |
| 865.6309 | 33.965   | 33.906   | 33.99433 | 9  | 4 | 5 | 1328808  | 2179232  | 2468387  |
| 953.6838 | 33.80283 | 33.7845  | 33.8535  | 8  | 3 | 5 | 453945.7 | 682313.5 | 844929.4 |
| 345.6045 | 30.99592 | 30.893   | 31.03517 | 10 | 5 | 5 | 711917.7 | 2121758  | 731962.4 |
| 344.1921 | 16.41072 | 16.39732 | 16.4223  | 6  | 3 | 3 | 52291.4  | 123102.6 | 75360.66 |
| 552.2613 | 26.22483 | 26.21033 | 26.24233 | 5  | 5 | 0 | 51754.45 | 172049.7 | 139234.5 |
| 271.2828 | 23.31067 | 23.27267 | 23.325   | 5  | 2 | 3 | 146039.7 | 162862.1 | 163584.8 |
| 1131.852 | 10.12634 | 10.04878 | 10.1429  | 6  | 3 | 3 | 1300039  | 589251.7 | 884532.7 |
| 566.3228 | 29.21508 | 29.19917 | 29.29983 | 10 | 5 | 5 | 1586684  | 7208358  | 7989097  |
| 746.4661 | 10.01772 | 9.897017 | 10.03782 | 7  | 3 | 4 | 790626.7 | 410242.4 | 683911.4 |
| 285.1828 | 28.23633 | 28.20717 | 28.24967 | 5  | 3 | 2 | 83872.75 | 218604.1 | 251412.4 |
| 631.451  | 38.31458 | 38.277   | 38.427   | 6  | 2 | 4 | 48690.84 | 171964.1 | 131233.3 |
| 468.8454 | 39.17392 | 39.12233 | 39.223   | 4  | 1 | 3 | 64864.6  | 169917.5 | 179417.3 |
| 215.511  | 9.537367 | 9.52075  | 9.545617 | 3  | 0 | 3 | 2170453  | 678654   | 1364737  |
| 649.4506 | 34.39725 | 34.36367 | 34.408   | 4  | 1 | 3 | 110253.9 | 153653.5 | 114348.1 |
| 435.526  | 31.0085  | 30.99333 | 31.088   | 5  | 1 | 4 | 117119   | 189543.7 | 423832.7 |
| 520.9713 | 32.12658 | 32.07267 | 32.1585  | 6  | 1 | 5 | 95270.91 | 248554.7 | 508878.9 |
| 630.4799 | 31.58375 | 31.56967 | 31.63033 | 8  | 3 | 5 | 557461.8 | 402751.9 | 434314.8 |
| 776.5747 | 34.11558 | 34.06667 | 34.148   | 10 | 5 | 5 | 8673830  | 16057132 | 17673804 |
| 485.8578 | 33.79783 | 33.70233 | 33.8535  | 10 | 5 | 5 | 561420.2 | 1489827  | 1648790  |
| 200.2375 | 21.50483 | 21.4125  | 21.551   | 4  | 1 | 3 | 81595.36 | 108164.4 | 72424    |
| 304.8915 | 2.091658 | 2.052283 | 2.159217 | 8  | 5 | 3 | 212897.7 | 783659.5 | 323654.9 |
| 369.0556 | 30.76242 | 30.73283 | 30.80633 | 4  | 1 | 3 | 1053188  | 425348.7 | 674840.9 |
| 534.2558 | 22.30758 | 22.22933 | 22.349   | 6  | 2 | 4 | 46986.25 | 162384.9 | 64160.14 |
| 442.3331 | 33.96083 | 33.93567 | 33.99433 | 5  | 2 | 3 | 144816.7 | 343086.6 | 321508.3 |
| 491.943  | 25.66883 | 25.64683 | 25.689   | 4  | 1 | 3 | 52985.18 | 91082.87 | 195328.4 |
| 435.3684 | 40.66    | 40.64033 | 40.72183 | 10 | 5 | 5 | 126344.3 | 402735.7 | 340913.9 |
| 330.5085 | 9.469283 | 9.444983 | 9.537367 | 4  | 1 | 3 | 3259342  | 567005   | 1137844  |
| 600.4234 | 9.6081   | 9.5879   | 9.64025  | 7  | 3 | 4 | 3069214  | 2496591  | 1759870  |
| 732.1496 | 10.69534 | 10.64867 | 10.75042 | 4  | 1 | 3 | 176979.2 | 265469.1 | 317075.4 |
| 483.6464 | 8.894167 | 8.765467 | 8.9587   | 3  | 3 | 0 | 165769.1 | 286585.6 | 274102.9 |
| 614.4849 | 36.28558 | 36.26167 | 36.32783 | 6  | 3 | 3 | 442645.3 | 2764683  | 2689110  |
| 374.6649 | 9.526042 | 9.460417 | 9.537367 | 4  | 1 | 3 | 2770131  | 2856179  | 4469625  |
| 864.6275 | 33.9625  | 33.8995  | 33.99433 | 10 | 5 | 5 | 2817812  | 5224461  | 5950943  |
| 170.005  | 9.482133 | 9.3803   | 9.596683 | 8  | 5 | 3 | 16385483 | 12211859 | 14106566 |
| 357.2403 | 38.379   | 38.32433 | 38.38883 | 3  | 0 | 3 | 178462   | 289999.3 | 103644.6 |
| 642.5158 | 42.83833 | 42.82033 | 42.87467 | 6  | 2 | 4 | 45401.96 | 320597.8 | 100857.8 |
| 392.1783 | 18.15675 | 18.1035  | 18.1595  | 4  | 4 | 0 | 134176   | 373462.9 | 365889.2 |
| 543.3983 | 38.76458 | 38.733   | 38.86817 | 8  | 4 | 4 | 162223.6 | 318778.9 | 329651.5 |
| 713.5128 | 43.0025  | 42.96817 | 43.02783 | 3  | 0 | 3 | 38389    | 223776.2 | 65261.97 |

|          |          |          |          |    |   |   |          |          |          |
|----------|----------|----------|----------|----|---|---|----------|----------|----------|
| 336.2079 | 18.094   | 18.06983 | 18.09483 | 3  | 0 | 3 | 1700274  | 595044.6 | 295049.2 |
| 291.6309 | 29.11867 | 29.07883 | 29.17717 | 6  | 4 | 2 | 138099.9 | 487041.7 | 489854   |
| 591.326  | 29.1395  | 29.11083 | 29.2115  | 9  | 5 | 4 | 374347.5 | 1141175  | 1378556  |
| 548.9003 | 43.879   | 43.8635  | 43.91483 | 10 | 5 | 5 | 615891.3 | 7776348  | 2293974  |
| 283.2829 | 39.47517 | 39.42633 | 39.52017 | 6  | 2 | 4 | 110659.6 | 644523.5 | 477066.7 |
| 481.3738 | 31.7265  | 31.69683 | 31.752   | 7  | 3 | 4 | 199904.1 | 218160.1 | 272835.4 |
| 702.1441 | 28.39717 | 28.36683 | 28.47817 | 6  | 2 | 4 | 218820.4 | 367988.5 | 498436.1 |
| 332.1592 | 13.1941  | 13.13913 | 13.21922 | 3  | 0 | 3 | 558080.1 | 136605.1 | 51251.74 |
| 768.4794 | 10.05975 | 10.05278 | 10.07255 | 4  | 1 | 3 | 571886.6 | 324902.9 | 538155.6 |
| 455.3719 | 29.73867 | 29.70133 | 29.76983 | 8  | 3 | 5 | 124403.5 | 255355.2 | 251383.1 |
| 248.9484 | 30.79083 | 30.74767 | 30.83517 | 4  | 0 | 4 | 88209.31 | 292172   | 575121.7 |
| 583.9441 | 22.996   | 22.98967 | 23.012   | 5  | 2 | 3 | 91811.72 | 334784.1 | 395681.7 |
| 636.4004 | 32.34217 | 32.29083 | 32.41583 | 5  | 2 | 3 | 54915.86 | 333825.8 | 183255.3 |
| 910.6606 | 33.90133 | 33.87667 | 33.924   | 7  | 3 | 4 | 198787.2 | 291225.7 | 382647.4 |
| 567.3263 | 29.21517 | 29.19917 | 29.31467 | 9  | 5 | 4 | 453489.8 | 1874284  | 2092956  |
| 908.6539 | 33.87683 | 33.8235  | 33.924   | 10 | 5 | 5 | 1667095  | 2768482  | 3174950  |
| 468.6936 | 10.67897 | 10.63528 | 10.7506  | 5  | 2 | 3 | 2746346  | 1566267  | 2955533  |
| 408.2289 | 12.92212 | 12.86173 | 12.98715 | 3  | 0 | 3 | 766295.5 | 222240.1 | 193752.9 |
| 507.3693 | 33.73242 | 33.657   | 33.78267 | 10 | 5 | 5 | 962381.9 | 3141614  | 3425310  |
| 252.2326 | 16.08674 | 16.02958 | 16.10027 | 8  | 3 | 5 | 111377.3 | 209942.4 | 202977.3 |
| 596.9448 | 30.76233 | 30.474   | 30.84967 | 5  | 1 | 4 | 132073.6 | 277406.4 | 606456.5 |
| 826.5912 | 9.888083 | 9.866317 | 9.918383 | 4  | 1 | 3 | 496746.6 | 202370.9 | 408862.5 |
| 244.2641 | 22.09275 | 22.02083 | 22.1355  | 10 | 5 | 5 | 1562017  | 3423776  | 2905435  |
| 336.5952 | 27.68017 | 27.62417 | 27.75583 | 10 | 5 | 5 | 662846.6 | 3823633  | 3870750  |
| 376.2125 | 16.72167 | 16.70383 | 16.743   | 3  | 3 | 0 | 876335.4 | 2763749  | 4094857  |
| 530.3223 | 29.78817 | 29.75533 | 29.87017 | 5  | 3 | 2 | 128063.5 | 507220.7 | 521459.1 |
| 420.1111 | 21.417   | 21.32883 | 21.46383 | 6  | 2 | 4 | 6239457  | 20509146 | 33078922 |
| 396.168  | 36.96133 | 36.94767 | 37.00783 | 3  | 0 | 3 | 178187.5 | 1349364  | 419092.2 |
| 497.3846 | 9.791017 | 9.7252   | 9.792833 | 3  | 0 | 3 | 196195.6 | 70272.85 | 132231.4 |
| 302.2331 | 27.67733 | 27.61717 | 27.707   | 5  | 2 | 3 | 44497.2  | 246409.5 | 110258.2 |
| 418.1319 | 28.12433 | 28.05933 | 28.162   | 7  | 2 | 5 | 300276.1 | 736319.4 | 1034406  |
| 672.4129 | 9.6609   | 9.6396   | 9.70935  | 5  | 2 | 3 | 1980775  | 692793.9 | 992693   |
| 498.4018 | 9.175408 | 8.988167 | 9.26485  | 4  | 3 | 1 | 731454.4 | 1836368  | 1147157  |
| 399.0922 | 22.77342 | 22.7225  | 22.80117 | 4  | 4 | 0 | 84038.62 | 247811   | 289113.4 |
| 321.2469 | 24.88633 | 24.81683 | 24.89    | 4  | 3 | 1 | 343529.3 | 1151611  | 1527881  |
| 455.3455 | 39.25692 | 39.1935  | 39.342   | 8  | 4 | 4 | 208727.7 | 335680.2 | 314052.2 |
| 378.2644 | 30.84733 | 30.79183 | 30.88867 | 5  | 3 | 2 | 67980.27 | 632839   | 416063   |
| 996.7065 | 33.7245  | 33.68233 | 33.78267 | 9  | 4 | 5 | 595880.3 | 757995   | 956675.5 |
| 623.2976 | 32.12658 | 32.07333 | 32.20817 | 8  | 4 | 4 | 290261.6 | 695815.8 | 972676.8 |
| 728.1854 | 29.11767 | 29.08283 | 29.163   | 6  | 4 | 2 | 134300.2 | 496808.8 | 500665.6 |
| 781.2004 | 30.24433 | 30.20633 | 30.24533 | 3  | 3 | 0 | 36892.54 | 110097.5 | 125372.4 |
| 414.1864 | 18.636   | 18.626   | 18.67533 | 5  | 3 | 2 | 722526.9 | 873150.8 | 1253615  |
| 561.9066 | 28.89692 | 28.818   | 29.04817 | 6  | 3 | 3 | 69524.91 | 79488.66 | 89847.48 |
| 362.37   | 37.33983 | 37.2845  | 37.5325  | 7  | 3 | 4 | 18649.01 | 69876.39 | 16430.53 |
| 215.6901 | 9.518825 | 9.460417 | 9.537367 | 4  | 1 | 3 | 7058330  | 2031274  | 4012068  |
| 606.3088 | 32.11667 | 32.05883 | 32.19283 | 9  | 5 | 4 | 614879.3 | 3390273  | 4057057  |
| 592.3385 | 30.26683 | 30.23533 | 30.36167 | 9  | 5 | 4 | 847485.4 | 2895953  | 3398561  |

|          |          |          |          |    |   |   |          |          |          |
|----------|----------|----------|----------|----|---|---|----------|----------|----------|
| 511.3588 | 33.43    | 33.35533 | 33.54917 | 7  | 5 | 2 | 127795.8 | 803465.9 | 542856.1 |
| 463.8447 | 33.8915  | 33.82983 | 33.98133 | 10 | 4 | 5 | 571703.9 | 1517894  | 1730162  |
| 777.578  | 34.11908 | 34.05983 | 34.148   | 10 | 5 | 5 | 3700886  | 6449763  | 7144762  |
| 387.2505 | 9.657833 | 9.188017 | 9.7372   | 10 | 4 | 5 | 2.76E+08 | 6.03E+08 | 5.66E+08 |
| 207.0047 | 22.81925 | 22.76683 | 22.845   | 6  | 2 | 4 | 34188.96 | 53959.87 | 43507.53 |
| 472.8692 | 13.28545 | 13.23695 | 13.35967 | 3  | 0 | 3 | 99556.02 | 320590.6 | 683007.8 |
| 556.0126 | 30.75525 | 30.48833 | 30.83517 | 6  | 1 | 4 | 424321.7 | 109303.9 | 229703.7 |
| 401.1546 | 10.4163  | 10.36242 | 10.44485 | 4  | 3 | 1 | 6503439  | 7929669  | 10373230 |
| 445.0285 | 25.68617 | 25.64683 | 25.69883 | 5  | 1 | 4 | 292975.6 | 184821.1 | 380781.3 |
| 288.6134 | 25.67167 | 25.66133 | 25.697   | 3  | 0 | 3 | 48220.53 | 28088.83 | 62808.54 |
| 289.6416 | 32.13383 | 32.10167 | 32.17767 | 8  | 3 | 5 | 473640.9 | 1929292  | 2943796  |
| 234.1622 | 23.86342 | 23.77933 | 23.89933 | 8  | 5 | 3 | 613866.6 | 2317830  | 2900725  |
| 343.1535 | 22.107   | 22.079   | 22.13033 | 5  | 2 | 3 | 114437.8 | 154569.9 | 87281.43 |
| 561.1617 | 22.11867 | 22.10083 | 22.16383 | 6  | 3 | 3 | 217560.9 | 781543.5 | 978320.1 |
| 476.1368 | 9.460417 | 9.43065  | 9.7455   | 5  | 1 | 4 | 7398723  | 634558.9 | 1346196  |
| 330.6683 | 9.469283 | 9.444983 | 9.537367 | 4  | 1 | 3 | 5674760  | 1254103  | 2108329  |
| 866.6342 | 33.965   | 33.94983 | 33.99433 | 7  | 3 | 4 | 327939.3 | 521644.5 | 629916.3 |
| 486.3591 | 33.83283 | 33.78767 | 33.8755  | 6  | 3 | 3 | 132493.5 | 415627.8 | 399908.1 |
| 279.2322 | 28.88383 | 28.86333 | 28.92233 | 3  | 0 | 3 | 178349   | 1051945  | 234279.1 |
| 473.8293 | 29.68883 | 29.6215  | 29.74233 | 10 | 5 | 5 | 78729.1  | 386609.7 | 187599.5 |
| 338.1874 | 15.9387  | 15.93788 | 15.98288 | 3  | 0 | 3 | 130934.1 | 57721.33 | 34455.65 |
| 616.4645 | 19.48642 | 19.43133 | 19.58883 | 8  | 3 | 5 | 222927.2 | 1675452  | 1886114  |
| 529.3262 | 24.37483 | 24.372   | 24.38867 | 3  | 0 | 3 | 120496.5 | 57311.71 | 36209.82 |
| 324.3161 | 9.483542 | 9.444983 | 9.537367 | 4  | 1 | 3 | 1766359  | 1412509  | 2970078  |
| 564.3076 | 26.88367 | 26.85383 | 26.93283 | 7  | 4 | 3 | 117114.7 | 332690.2 | 347067.7 |
| 318.2069 | 17.07583 | 17.0515  | 17.09983 | 5  | 2 | 3 | 49761.25 | 370215.8 | 177449.6 |
| 340.121  | 18.47133 | 18.38933 | 18.58117 | 7  | 2 | 5 | 90134.62 | 173000.4 | 191853.6 |
| 333.6106 | 9.515567 | 9.47815  | 9.545617 | 5  | 2 | 3 | 13347642 | 3178855  | 5623667  |
| 173.3905 | 9.463983 | 9.444983 | 9.537367 | 3  | 0 | 3 | 1964503  | 1539167  | 2230156  |
| 357.1122 | 27.252   | 27.20017 | 27.27283 | 5  | 2 | 3 | 52428.81 | 140563.2 | 116578.2 |
| 434.3636 | 29.14083 | 29.094   | 29.18517 | 6  | 3 | 3 | 110557.1 | 120321.5 | 114645.3 |
| 730.3356 | 22.2675  | 22.18833 | 22.33417 | 4  | 3 | 1 | 927363.9 | 2966275  | 4709418  |
| 309.3268 | 35.16842 | 35.14667 | 35.20567 | 8  | 4 | 4 | 103872   | 578900.6 | 387210.3 |
| 464.2051 | 9.4622   | 9.416233 | 9.537367 | 4  | 1 | 3 | 1793104  | 736035.4 | 1428549  |
| 905.686  | 9.817433 | 9.591833 | 9.862433 | 7  | 3 | 3 | 9435741  | 10475641 | 13826736 |
| 499.8736 | 39.03317 | 38.95917 | 39.08967 | 5  | 2 | 3 | 92951.28 | 180668.6 | 193982.9 |
| 630.5069 | 40.145   | 40.07883 | 40.17467 | 6  | 3 | 3 | 318349.5 | 230206.6 | 128833   |
| 265.2359 | 13.13328 | 13.09513 | 13.17767 | 8  | 3 | 5 | 742855.4 | 916656.7 | 818572.3 |
| 656.0167 | 9.4622   | 9.416233 | 9.537367 | 4  | 1 | 3 | 6329733  | 1001335  | 1675386  |
| 478.489  | 9.463983 | 9.416233 | 9.537367 | 3  | 0 | 3 | 4643954  | 225987   | 491258.4 |
| 735.0718 | 9.448158 | 9.416233 | 9.537367 | 4  | 1 | 3 | 6504113  | 887723.7 | 1460708  |
| 1005.609 | 9.21455  | 9.101033 | 9.266617 | 5  | 2 | 3 | 6872832  | 1883063  | 2042076  |
| 520.395  | 10.99405 | 10.9416  | 11.1144  | 9  | 4 | 5 | 173640.7 | 300309.3 | 359905.3 |
| 159.5249 | 17.12658 | 16.97633 | 17.2145  | 6  | 1 | 5 | 86811.75 | 179356.5 | 295239.8 |
| 678.5129 | 9.48745  | 9.2722   | 9.751083 | 9  | 3 | 4 | 1.83E+08 | 23728529 | 36364459 |
| 283.0701 | 4.353917 | 4.2154   | 4.41305  | 3  | 3 | 0 | 3251329  | 1.35E+08 | 2.11E+08 |
| 500.2384 | 11.7754  | 11.74298 | 11.92125 | 3  | 0 | 3 | 829444.8 | 12144.07 | 9979.838 |

|          |          |          |          |    |   |   |          |          |          |
|----------|----------|----------|----------|----|---|---|----------|----------|----------|
| 532.2565 | 31.3185  | 31.301   | 31.32883 | 3  | 0 | 3 | 52485.29 | 60484.78 | 20165.72 |
| 220.178  | 13.11878 | 13.09513 | 13.1243  | 6  | 3 | 3 | 1327971  | 1889589  | 1732086  |
| 865.5983 | 42.19625 | 42.10933 | 42.22883 | 4  | 1 | 3 | 51568.42 | 240827.6 | 127153.8 |
| 716.354  | 43.60158 | 43.55817 | 43.6645  | 8  | 3 | 5 | 83566.54 | 368757.4 | 210629.4 |
| 368.7225 | 9.546583 | 9.4881   | 9.584433 | 8  | 5 | 3 | 79949816 | 1.02E+08 | 1.48E+08 |
| 265.1955 | 31.324   | 31.301   | 31.37217 | 4  | 0 | 4 | 49579.02 | 146407.9 | 66797.45 |
| 732.5482 | 34.20883 | 34.152   | 34.2315  | 10 | 5 | 5 | 13103915 | 26080960 | 28313189 |
| 287.8893 | 18.47633 | 18.38883 | 18.61717 | 5  | 3 | 1 | 7600234  | 58932008 | 90096420 |
| 822.6074 | 34.03867 | 34.02717 | 34.07833 | 8  | 3 | 5 | 550264.3 | 834393.5 | 955972.3 |
| 573.9105 | 33.50883 | 33.43183 | 33.58283 | 9  | 4 | 5 | 308784.2 | 859446.9 | 926331.1 |
| 626.2754 | 22.12717 | 22.03667 | 22.15067 | 5  | 2 | 3 | 356800   | 748253.6 | 901653.7 |
| 485.3422 | 9.988417 | 9.93755  | 10.00747 | 7  | 4 | 3 | 348423.2 | 371581.7 | 433562.5 |
| 487.0832 | 26.16692 | 26.1375  | 26.18083 | 6  | 2 | 4 | 88836.13 | 105847.5 | 158985.5 |
| 236.1594 | 23.88408 | 23.79267 | 23.9295  | 6  | 3 | 3 | 160011.3 | 527585.9 | 663720.2 |
| 307.0494 | 17.14067 | 17.0745  | 17.1785  | 4  | 1 | 3 | 33164.68 | 101657.5 | 98338.6  |
| 804.9919 | 9.902742 | 9.895317 | 9.946383 | 4  | 1 | 3 | 384360.8 | 207101.3 | 349716   |
| 499.1878 | 22.51683 | 22.50633 | 22.54667 | 3  | 0 | 3 | 200594.2 | 56769.53 | 24334.17 |
| 1852.103 | 9.507758 | 9.460417 | 9.545617 | 4  | 1 | 3 | 4515107  | 647701.5 | 1391875  |
| 165.9781 | 22.81183 | 22.74667 | 22.82667 | 3  | 0 | 3 | 49606.05 | 57787.17 | 38169.98 |
| 292.0753 | 22.13133 | 22.05267 | 22.136   | 4  | 1 | 3 | 103934.3 | 150927.3 | 186316.6 |
| 485.0882 | 32.12117 | 32.07267 | 32.146   | 6  | 1 | 5 | 88128    | 234964.3 | 442033.4 |
| 685.7516 | 9.4622   | 9.43065  | 9.537367 | 4  | 1 | 3 | 16813316 | 13668897 | 14835111 |
| 441.1701 | 9.643992 | 9.43065  | 9.7055   | 8  | 3 | 3 | 62000760 | 81697701 | 1.37E+08 |
| 464.9083 | 15.88828 | 15.85965 | 15.95405 | 5  | 1 | 4 | 61464.93 | 135533.4 | 265700.9 |
| 412.8078 | 31.42133 | 31.37217 | 31.45333 | 10 | 5 | 5 | 301824.9 | 1010295  | 679504.6 |
| 942.492  | 41.2075  | 41.14833 | 41.26683 | 4  | 3 | 1 | 38156.12 | 90026.57 | 58226.36 |
| 587.457  | 31.64183 | 31.62617 | 31.66567 | 5  | 2 | 3 | 192728.9 | 132701.5 | 160018.4 |
| 667.2932 | 22.11583 | 22.05267 | 22.16383 | 5  | 2 | 3 | 168397.1 | 436602.9 | 586019.8 |
| 305.0876 | 25.67292 | 25.66133 | 25.6825  | 4  | 1 | 3 | 115956.3 | 220328.3 | 377991.1 |
| 564.0626 | 28.10267 | 28.05933 | 28.14683 | 3  | 0 | 3 | 43368.63 | 52010.97 | 97560.24 |
| 597.1198 | 24.35967 | 24.31317 | 24.38717 | 4  | 1 | 3 | 61512.2  | 66319.77 | 110592.6 |
| 264.2326 | 13.13351 | 13.09513 | 13.20888 | 10 | 5 | 5 | 4044303  | 6964035  | 6384611  |
| 778.2012 | 30.26283 | 30.23533 | 30.33617 | 7  | 4 | 3 | 124735   | 562278   | 502488.1 |
| 1010.498 | 9.448158 | 9.416233 | 9.537367 | 4  | 1 | 3 | 2193726  | 572141.5 | 1279347  |
| 867.1906 | 41.2005  | 41.1485  | 41.2225  | 6  | 3 | 3 | 47442.96 | 84713.81 | 79211.94 |
| 469.3874 | 30.53508 | 30.50483 | 30.57533 | 8  | 3 | 5 | 1702238  | 2167646  | 1966221  |
| 470.3906 | 30.53017 | 30.50483 | 30.57533 | 6  | 3 | 3 | 218861.7 | 234930.6 | 208809.4 |
| 411.8032 | 34.23067 | 34.19083 | 34.27683 | 7  | 3 | 4 | 61396.22 | 111253.6 | 124844.1 |
| 656.9134 | 9.4622   | 9.444983 | 9.537367 | 4  | 1 | 3 | 12845569 | 2133706  | 4582870  |
| 465.3383 | 9.4622   | 9.416233 | 9.537367 | 4  | 1 | 3 | 1991879  | 1627391  | 1398324  |
| 781.2634 | 31.32358 | 31.301   | 31.34333 | 4  | 0 | 4 | 905187.3 | 3501.997 | 3301.526 |
| 594.2824 | 22.06333 | 22.005   | 22.079   | 3  | 0 | 3 | 52274.08 | 51217.67 | 33499.92 |
| 550.0475 | 32.87817 | 32.80567 | 32.94583 | 3  | 0 | 3 | 37929.86 | 65375.01 | 69363.89 |
| 592.927  | 43.59542 | 43.572   | 43.63417 | 10 | 5 | 5 | 588926.6 | 6184632  | 1387724  |
| 237.1137 | 12.10555 | 12.05648 | 12.21482 | 3  | 0 | 3 | 396364.7 | 333467.3 | 222654.1 |
| 365.1712 | 18.62067 | 18.596   | 18.646   | 6  | 3 | 3 | 455483.7 | 775457.2 | 939298.4 |
| 299.0794 | 31.57083 | 31.49983 | 31.60233 | 5  | 4 | 1 | 40380.68 | 163179.1 | 91094.73 |

|          |          |          |          |    |   |   |          |          |          |
|----------|----------|----------|----------|----|---|---|----------|----------|----------|
| 503.8872 | 27.664   | 27.609   | 27.8035  | 10 | 5 | 5 | 2063124  | 12578419 | 11648199 |
| 187.0753 | 31.65433 | 31.61217 | 31.69017 | 4  | 3 | 1 | 73462.51 | 273172.9 | 189901.8 |
| 734.4374 | 9.537367 | 9.444983 | 9.563383 | 3  | 0 | 3 | 18647486 | 15549108 | 27506045 |
| 468.3839 | 30.541   | 30.50483 | 30.61833 | 9  | 4 | 5 | 5104972  | 7385036  | 6706851  |
| 470.3711 | 9.20005  | 9.101033 | 9.280533 | 7  | 5 | 2 | 8624914  | 18483491 | 14356133 |
| 373.9835 | 13.7406  | 13.44552 | 13.75475 | 5  | 1 | 3 | 91946.67 | 242994.4 | 412781.6 |
| 576.2756 | 32.102   | 32.04183 | 32.20817 | 10 | 5 | 5 | 3633779  | 12705473 | 17285256 |
| 415.281  | 11.18192 | 11.13748 | 11.33565 | 9  | 4 | 5 | 187249.4 | 499803   | 586570.5 |
| 590.323  | 29.1395  | 29.111   | 29.22633 | 9  | 5 | 4 | 1514938  | 4183844  | 5046906  |
| 565.4115 | 38.63917 | 38.59683 | 38.7505  | 7  | 3 | 4 | 105842   | 373734.9 | 292744.3 |
| 526.2771 | 21.95658 | 21.84667 | 21.991   | 4  | 1 | 3 | 68935.86 | 250776   | 116339.9 |
| 410.348  | 31.75125 | 31.72517 | 31.81633 | 10 | 5 | 5 | 673990.4 | 1359223  | 1537170  |
| 302.1448 | 30.44833 | 30.34733 | 30.51617 | 6  | 2 | 4 | 795246.9 | 4417042  | 5120624  |
| 697.1939 | 30.98783 | 30.90517 | 31.07383 | 8  | 3 | 5 | 658019.6 | 1647707  | 3422918  |
| 1104.669 | 10.68129 | 10.599   | 10.77118 | 6  | 3 | 3 | 8055949  | 4948646  | 6256672  |
| 937.6891 | 39.13883 | 39.12233 | 39.223   | 5  | 2 | 3 | 124759.6 | 179180.6 | 238487.8 |
| 411.1204 | 31.301   | 31.29083 | 31.32867 | 3  | 0 | 3 | 211806.3 | 80725.92 | 30648.15 |
| 703.1474 | 28.42917 | 28.36683 | 28.46717 | 4  | 1 | 3 | 66455.27 | 75755.03 | 98783.73 |
| 413.2968 | 9.86295  | 9.73415  | 9.918383 | 10 | 5 | 4 | 3721798  | 2440305  | 3970346  |
| 444.2347 | 30.51467 | 30.5045  | 30.52    | 3  | 0 | 3 | 54901.84 | 79945.45 | 27728.78 |
| 297.6283 | 26.88483 | 26.834   | 26.919   | 5  | 2 | 3 | 34352.25 | 43969.2  | 61633.73 |
| 410.3117 | 27.546   | 27.51533 | 27.648   | 3  | 0 | 3 | 95959.87 | 227015.1 | 246702.1 |
| 734.5546 | 34.2125  | 34.1365  | 34.2315  | 9  | 4 | 5 | 1350434  | 1929927  | 2132666  |
| 410.8035 | 34.039   | 34.00583 | 34.06433 | 9  | 4 | 5 | 568283.3 | 1481094  | 1699561  |
| 290.2485 | 14.93581 | 14.89205 | 15.00128 | 8  | 3 | 5 | 682462.7 | 2019297  | 1949985  |
| 291.1301 | 29.25175 | 29.228   | 29.28517 | 4  | 1 | 3 | 103513.8 | 147083.8 | 245747.7 |
| 372.3307 | 25.19767 | 25.14933 | 25.24533 | 5  | 2 | 3 | 45064.5  | 218562.2 | 120706   |
| 339.301  | 30.36667 | 30.35117 | 30.4455  | 5  | 3 | 2 | 174058.9 | 255185.9 | 174539.3 |
| 302.1331 | 29.24733 | 29.19917 | 29.31467 | 3  | 0 | 3 | 113372.5 | 130354   | 215291.9 |
| 753.5206 | 29.82258 | 29.79967 | 29.834   | 10 | 5 | 5 | 681369.9 | 6533665  | 1174345  |
| 282.633  | 26.23842 | 26.202   | 26.31783 | 6  | 2 | 4 | 148466.5 | 314032.2 | 485460.2 |
| 368.4171 | 9.522017 | 9.460417 | 9.545617 | 4  | 1 | 3 | 7208776  | 2052886  | 4056983  |
| 542.323  | 29.12633 | 29.09717 | 29.22633 | 9  | 5 | 4 | 833925.4 | 2480435  | 3026945  |
| 379.1874 | 18.8655  | 18.849   | 18.8805  | 7  | 4 | 3 | 192178.4 | 327212.7 | 210075.8 |
| 415.0884 | 19.205   | 19.2025  | 19.22433 | 3  | 0 | 3 | 60655.29 | 74363.2  | 90377.53 |
| 754.6476 | 9.53435  | 9.52075  | 9.6125   | 4  | 1 | 3 | 3661837  | 1142291  | 2372442  |
| 517.0613 | 25.9055  | 25.90167 | 25.9325  | 5  | 1 | 4 | 82372.63 | 140164   | 283023.9 |
| 392.3166 | 22.888   | 22.85933 | 22.93817 | 4  | 1 | 3 | 60079.66 | 462630.3 | 184298.7 |
| 499.372  | 39.00217 | 38.98067 | 39.10433 | 6  | 2 | 4 | 189171.6 | 417123   | 367183.5 |
| 292.2642 | 15.70459 | 15.67685 | 15.77112 | 6  | 2 | 4 | 280850.5 | 249516.3 | 252532.1 |
| 556.177  | 10.72897 | 10.62815 | 10.75515 | 4  | 1 | 3 | 277206.2 | 260255.6 | 464967.2 |
| 336.2076 | 13.43883 | 13.40492 | 13.48825 | 3  | 0 | 3 | 655228.9 | 327581.5 | 168396.5 |
| 402.2681 | 10.42227 | 10.36523 | 10.45412 | 9  | 4 | 5 | 1.62E+08 | 5.11E+08 | 6.28E+08 |
| 332.1785 | 12.10555 | 12.09918 | 12.21482 | 3  | 0 | 3 | 387932.1 | 112794.4 | 43211.32 |
| 317.6367 | 30.23533 | 30.21567 | 30.2605  | 3  | 3 | 0 | 67542.27 | 181295.4 | 221385.2 |
| 469.9552 | 17.14917 | 17.06583 | 17.1765  | 3  | 0 | 3 | 57591.22 | 94994.79 | 184841.3 |
| 636.4795 | 39.8315  | 39.8055  | 39.89233 | 5  | 2 | 3 | 139058.3 | 1170881  | 1303454  |

|          |          |          |          |    |   |   |          |          |          |
|----------|----------|----------|----------|----|---|---|----------|----------|----------|
| 344.2996 | 20.14467 | 20.103   | 20.3295  | 8  | 3 | 5 | 57263.2  | 147458.5 | 135427.5 |
| 731.3391 | 22.26017 | 22.21783 | 22.28967 | 3  | 3 | 0 | 380271.1 | 1150930  | 1866668  |
| 1132.855 | 10.11891 | 10.03768 | 10.1429  | 6  | 4 | 2 | 732904.5 | 380053   | 564879.2 |
| 991.6753 | 30.95083 | 30.93483 | 31.07383 | 9  | 5 | 4 | 1745811  | 4547354  | 5942693  |
| 790.5905 | 35.84433 | 35.82833 | 35.87767 | 6  | 2 | 4 | 277230.3 | 2111080  | 1713257  |
| 323.2421 | 25.24242 | 25.16817 | 25.30433 | 8  | 4 | 4 | 311136.9 | 1485077  | 1662049  |
| 313.2361 | 12.67882 | 12.64    | 12.82703 | 8  | 3 | 5 | 95994.2  | 276258.8 | 341982.2 |
| 182.0391 | 21.67925 | 21.5865  | 21.69633 | 4  | 1 | 3 | 49258.65 | 266156   | 234158.8 |
| 332.0986 | 22.13158 | 22.03667 | 22.14983 | 6  | 2 | 4 | 1106299  | 2315325  | 3126214  |
| 315.0932 | 24.93975 | 24.92217 | 25.0185  | 4  | 3 | 1 | 33313.48 | 103809.2 | 45847.74 |
| 1847.875 | 9.47815  | 9.416233 | 9.537367 | 3  | 0 | 3 | 3108912  | 300342.4 | 671586.1 |
| 325.3218 | 37.43775 | 37.40167 | 37.63617 | 10 | 5 | 5 | 90743.55 | 602272.5 | 362412.1 |
| 609.4383 | 38.41667 | 38.38267 | 38.53    | 6  | 3 | 3 | 73226.5  | 214697.9 | 165676.1 |
| 779.4037 | 9.5376   | 9.427233 | 9.584433 | 6  | 4 | 2 | 89968072 | 4626237  | 2676441  |
| 442.2904 | 8.913742 | 8.730367 | 8.9755   | 8  | 5 | 3 | 772307.8 | 1901757  | 1792921  |
| 636.1078 | 26.43675 | 26.416   | 26.474   | 4  | 1 | 3 | 53288.49 | 64201.77 | 88047.44 |
| 509.9781 | 17.14917 | 17.08033 | 17.161   | 3  | 0 | 3 | 46682.66 | 52433.73 | 115444.1 |
| 529.8842 | 33.64317 | 33.59667 | 33.71167 | 10 | 5 | 5 | 420508.7 | 1326815  | 1445462  |
| 452.3948 | 40.65108 | 40.62483 | 40.70633 | 10 | 5 | 5 | 411137.8 | 1081317  | 688309.1 |
| 340.2206 | 24.33633 | 24.31317 | 24.35767 | 4  | 0 | 4 | 80664.69 | 176163.8 | 93461.23 |
| 777.1888 | 29.11133 | 29.09583 | 29.13483 | 4  | 3 | 1 | 85650.4  | 189160.7 | 184443.4 |
| 834.6434 | 44.79867 | 44.76633 | 44.876   | 10 | 5 | 5 | 176996.3 | 1329666  | 364970.7 |
| 332.2594 | 9.508475 | 9.401867 | 9.572217 | 4  | 3 | 1 | 2268338  | 1027165  | 1047050  |
| 411.3515 | 31.74583 | 31.7245  | 31.78267 | 7  | 3 | 4 | 107536.5 | 208641.1 | 260715.9 |
| 639.9503 | 33.29833 | 33.2885  | 33.39433 | 6  | 2 | 4 | 141876   | 411035.2 | 424016.2 |
| 702.5375 | 34.12717 | 34.083   | 34.13417 | 5  | 2 | 3 | 585335.3 | 6645870  | 7214767  |
| 203.1433 | 13.12258 | 13.10973 | 13.13668 | 5  | 3 | 2 | 254132.1 | 404130.1 | 250827.7 |
| 583.377  | 8.917533 | 8.747883 | 8.96825  | 3  | 3 | 0 | 588209.1 | 1055685  | 1504631  |
| 463.0343 | 22.99917 | 22.938   | 23.01867 | 7  | 5 | 2 | 126090.2 | 454383   | 517176.5 |
| 247.2062 | 26.08983 | 25.99033 | 26.10283 | 5  | 2 | 3 | 143866.5 | 666445.3 | 622156.5 |
| 386.3996 | 42.79975 | 42.719   | 42.99867 | 6  | 2 | 4 | 20101.63 | 125303.9 | 36687.3  |
| 778.5811 | 34.137   | 34.10417 | 34.148   | 8  | 3 | 5 | 892355.3 | 1364985  | 1517655  |
| 383.122  | 32.52517 | 32.5135  | 32.55117 | 3  | 3 | 0 | 92343.3  | 303817.5 | 384767.7 |
| 687.3296 | 18.58858 | 18.56617 | 18.6065  | 4  | 3 | 1 | 495351.3 | 1812126  | 2995330  |
| 480.4085 | 19.68958 | 19.68733 | 19.8     | 4  | 1 | 3 | 34527.52 | 46479.68 | 52293.37 |
| 737.2664 | 9.463983 | 9.416233 | 9.537367 | 3  | 0 | 3 | 4792515  | 501806.3 | 857797.4 |
| 733.5516 | 34.20933 | 34.152   | 34.2315  | 10 | 5 | 5 | 5257362  | 10101677 | 11126348 |
| 387.7221 | 9.537367 | 9.4881   | 9.584433 | 9  | 5 | 4 | 9699433  | 8887341  | 13138607 |
| 270.2794 | 23.31133 | 23.27267 | 23.3685  | 9  | 4 | 5 | 1064678  | 1401519  | 1315460  |
| 734.1621 | 29.24233 | 29.228   | 29.31467 | 5  | 1 | 4 | 624089.6 | 255256.6 | 398598.3 |
| 419.2908 | 20.86083 | 20.817   | 20.91867 | 5  | 2 | 3 | 71193.74 | 548192.8 | 177609.6 |
| 419.2046 | 26.58467 | 26.531   | 26.62083 | 4  | 0 | 4 | 80365.2  | 72003.69 | 33440.18 |
| 401.2989 | 10.436   | 10.41848 | 10.47928 | 4  | 0 | 4 | 5.96E+08 | 2.01E+09 | 1.82E+09 |
| 456.4053 | 35.16892 | 35.147   | 35.20517 | 4  | 1 | 3 | 47121.95 | 61821.78 | 54610.58 |
| 426.1946 | 24.136   | 24.12    | 24.16567 | 5  | 1 | 4 | 63345.38 | 271425.3 | 92852.46 |
| 412.1893 | 18.63767 | 18.62583 | 18.67533 | 7  | 4 | 3 | 2179990  | 3223591  | 4935380  |
| 667.3384 | 10.02349 | 9.9897   | 10.04445 | 6  | 3 | 3 | 9542765  | 4066459  | 7373820  |



|          |          |          |          |    |   |   |          |          |          |
|----------|----------|----------|----------|----|---|---|----------|----------|----------|
| 539.4044 | 12.1581  | 12.14913 | 12.18558 | 6  | 2 | 4 | 217240.2 | 594763.1 | 698152.9 |
| 634.2603 | 9.4622   | 9.43065  | 9.537367 | 4  | 1 | 3 | 3825713  | 2654165  | 5683552  |
| 395.8901 | 32.31267 | 32.2815  | 32.366   | 3  | 0 | 3 | 256553.4 | 4243.162 | 2578.861 |
| 954.6864 | 33.81767 | 33.80033 | 33.8535  | 5  | 2 | 3 | 150633.4 | 163652.4 | 212170   |
| 677.4998 | 9.4101   | 9.317883 | 9.591083 | 6  | 3 | 2 | 75162128 | 20839723 | 15673262 |
| 280.2277 | 11.97556 | 11.95348 | 12.119   | 8  | 3 | 5 | 757318.6 | 938506.4 | 1023684  |
| 615.9287 | 9.52075  | 9.5169   | 9.537367 | 3  | 0 | 3 | 2521847  | 1159382  | 2279572  |
| 263.3479 | 9.4622   | 9.416233 | 9.537367 | 4  | 1 | 3 | 5394014  | 610001.3 | 1334511  |
| 581.4254 | 19.93283 | 19.92233 | 20.09133 | 5  | 1 | 4 | 40168.91 | 56767.06 | 97556.16 |
| 415.2545 | 8.910642 | 8.677417 | 8.95155  | 4  | 3 | 1 | 386451.1 | 1140497  | 1315297  |
| 262.9801 | 9.4622   | 9.43065  | 9.537367 | 4  | 1 | 3 | 5497257  | 617267.2 | 1293215  |
| 952.68   | 33.80058 | 33.74783 | 33.8535  | 10 | 5 | 5 | 1023343  | 1487464  | 1743490  |
| 833.3501 | 10.67225 | 10.63755 | 10.77118 | 8  | 4 | 4 | 3642456  | 4375116  | 4569598  |
| 344.3164 | 27.05917 | 27       | 27.08917 | 5  | 2 | 3 | 1514619  | 3967990  | 6210237  |
| 1040.733 | 33.66942 | 33.6305  | 33.71167 | 6  | 2 | 4 | 308334.8 | 392965.3 | 525609.2 |
| 782.9788 | 9.862483 | 9.8518   | 9.932383 | 5  | 2 | 3 | 485132.2 | 264562.5 | 415769.1 |
| 602.9448 | 43.60225 | 43.55683 | 43.6235  | 10 | 5 | 5 | 184504.7 | 2221707  | 662220.8 |
| 341.1164 | 8.699883 | 8.608267 | 8.751467 | 3  | 0 | 3 | 3191425  | 546405.5 | 892762.5 |
| 388.1786 | 23.94433 | 23.836   | 23.9735  | 7  | 2 | 5 | 832736.9 | 205364.5 | 166545.4 |
| 616.4278 | 10.02258 | 9.981967 | 10.05848 | 5  | 2 | 3 | 852024.9 | 319831.9 | 337866.5 |
| 1761.086 | 9.469283 | 9.444983 | 9.537367 | 4  | 1 | 3 | 6834538  | 1457196  | 2880974  |
| 163.0755 | 12.93302 | 12.84737 | 13.10903 | 8  | 4 | 4 | 2995055  | 3703868  | 3107053  |
| 373.2862 | 13.83593 | 13.76062 | 13.85498 | 6  | 2 | 4 | 59404.53 | 121145.8 | 134678.4 |
| 668.3415 | 10.01235 | 9.9637   | 10.04445 | 7  | 3 | 4 | 2881833  | 1108336  | 2047138  |
| 565.9133 | 38.64808 | 38.612   | 38.7505  | 6  | 2 | 4 | 81935.73 | 161756.1 | 145601.4 |
| 366.0301 | 9.511783 | 9.460417 | 9.537367 | 4  | 1 | 3 | 6954658  | 2018265  | 4170409  |
| 227.064  | 21.30217 | 21.19517 | 21.304   | 3  | 0 | 3 | 1474394  | 380019.3 | 76190.73 |
| 1084.426 | 9.4622   | 9.416233 | 9.537367 | 4  | 1 | 3 | 3055420  | 1038821  | 2232698  |
| 782.4769 | 9.880883 | 9.866317 | 9.904433 | 4  | 1 | 3 | 674044.3 | 351842.1 | 438307.9 |
| 360.3629 | 37.34508 | 37.32033 | 37.50283 | 10 | 5 | 5 | 599242.9 | 6239163  | 1217809  |
| 774.0744 | 28.429   | 28.39517 | 28.52317 | 5  | 1 | 4 | 111246.6 | 97622.83 | 173735.4 |
| 652.6772 | 9.4622   | 9.444983 | 9.537367 | 4  | 1 | 3 | 16417399 | 2359827  | 5036786  |
| 577.0323 | 10.24898 | 10.12493 | 10.25657 | 5  | 3 | 2 | 179218.5 | 68590.36 | 80700.08 |
| 479.1083 | 22.10717 | 22.08617 | 22.136   | 4  | 3 | 1 | 94912.41 | 206098.5 | 260251.2 |
| 516.9426 | 22.108   | 22.06867 | 22.14983 | 4  | 0 | 4 | 71309.76 | 249808.5 | 329054.3 |
| 553.445  | 33.85075 | 33.81483 | 33.887   | 8  | 3 | 5 | 480271.9 | 1072105  | 1155357  |
| 1004.599 | 9.4622   | 9.416233 | 9.537367 | 4  | 1 | 3 | 4349877  | 1251206  | 2711825  |
| 278.104  | 26.15183 | 26.12217 | 26.205   | 3  | 0 | 3 | 76016.49 | 81966.38 | 76198.42 |
| 756.3044 | 9.53435  | 9.52075  | 9.626317 | 4  | 1 | 3 | 9381849  | 3370859  | 6723312  |
| 797.5472 | 29.79267 | 29.76983 | 29.80333 | 10 | 5 | 5 | 494283.1 | 3985490  | 550318.2 |
| 298.2383 | 21.44917 | 21.40183 | 21.47633 | 5  | 2 | 3 | 55193.35 | 220343   | 263982.7 |
| 432.1692 | 24.8385  | 24.8165  | 24.8735  | 3  | 0 | 3 | 240579.7 | 520012.5 | 595822.8 |
| 404.0017 | 25.68558 | 25.67167 | 25.69883 | 4  | 1 | 3 | 133900.8 | 64399.9  | 136752.4 |
| 702.4981 | 6.39755  | 6.026783 | 6.557917 | 6  | 3 | 2 | 2990669  | 15789896 | 25567922 |
| 425.3347 | 44.76708 | 44.73667 | 44.88683 | 10 | 5 | 5 | 91262.02 | 862647.1 | 127510.4 |
| 424.8474 | 10.21668 | 9.9231   | 10.25052 | 5  | 1 | 4 | 196059.8 | 72277.54 | 87940.91 |
| 434.1706 | 37.59183 | 37.58017 | 37.61417 | 3  | 0 | 3 | 124259.5 | 874145.3 | 140461.7 |

|          |          |          |          |    |   |   |          |          |          |
|----------|----------|----------|----------|----|---|---|----------|----------|----------|
| 408.2287 | 10.98405 | 10.86645 | 11.00872 | 3  | 0 | 3 | 1478621  | 131191.6 | 96497.24 |
| 281.5758 | 9.455275 | 9.43065  | 9.537367 | 4  | 1 | 3 | 5390541  | 569996.8 | 1181718  |
| 350.4518 | 9.469283 | 9.444983 | 9.537367 | 4  | 1 | 3 | 3325039  | 1289822  | 1664682  |
| 735.5569 | 34.2135  | 34.18617 | 34.2315  | 5  | 2 | 3 | 180568.9 | 284781.7 | 336199.4 |
| 498.9944 | 9.455275 | 9.43065  | 9.537367 | 4  | 1 | 3 | 6156472  | 598896.6 | 1291032  |
| 936.6852 | 39.12783 | 39.094   | 39.223   | 8  | 3 | 5 | 278944.5 | 443470.6 | 536786.7 |
| 330.8287 | 9.47815  | 9.444983 | 9.537367 | 3  | 0 | 3 | 7498111  | 2566022  | 5557244  |
| 760.4501 | 9.53435  | 9.506667 | 9.626317 | 4  | 1 | 3 | 4901124  | 2169831  | 3574856  |
| 458.0145 | 9.463983 | 9.416233 | 9.537367 | 3  | 0 | 3 | 3050365  | 213518.2 | 454573.4 |
| 219.1747 | 16.35523 | 16.29342 | 16.41442 | 5  | 2 | 3 | 692387.3 | 1865379  | 2206070  |
| 215.943  | 9.548692 | 9.52075  | 9.598583 | 4  | 1 | 3 | 2724454  | 999942.9 | 870760.4 |
| 442.3475 | 10.03412 | 9.982717 | 10.06057 | 5  | 3 | 2 | 176215.8 | 218901.7 | 249718.6 |
| 325.1661 | 38.1675  | 38.09733 | 38.21533 | 4  | 1 | 3 | 68145.7  | 329893.2 | 50237.73 |
| 260.5818 | 18.10333 | 18.06167 | 18.158   | 5  | 2 | 3 | 78028.33 | 115935.1 | 156334.4 |
| 543.3262 | 29.11083 | 29.09717 | 29.1395  | 5  | 5 | 0 | 220832.2 | 532563.4 | 697576.4 |
| 416.0103 | 22.10083 | 22.04967 | 22.21683 | 9  | 4 | 4 | 57199.86 | 353210.3 | 186158.2 |
| 653.1222 | 9.463983 | 9.444983 | 9.64025  | 5  | 1 | 3 | 20096896 | 2998905  | 6337016  |
| 331.6506 | 9.4622   | 9.444983 | 9.537367 | 4  | 1 | 3 | 6786822  | 1596441  | 3043172  |
| 480.107  | 26.4435  | 26.42867 | 26.45933 | 5  | 2 | 3 | 126499.9 | 214097.1 | 291528.9 |
| 1667.22  | 9.541492 | 9.49235  | 9.6125   | 4  | 1 | 3 | 6693976  | 1596009  | 3230818  |
| 1085.762 | 33.59408 | 33.56383 | 33.64    | 4  | 1 | 3 | 114725.8 | 81939.57 | 134218   |
| 280.1759 | 24.41067 | 24.3575  | 24.452   | 6  | 2 | 4 | 264850   | 1210025  | 1155860  |
| 475.977  | 9.455083 | 9.43065  | 9.537367 | 4  | 1 | 3 | 8799526  | 826706.5 | 1688779  |
| 570.9136 | 43.738   | 43.71783 | 43.7605  | 10 | 5 | 5 | 639878.5 | 7259158  | 1522581  |
| 433.3327 | 39.41408 | 39.384   | 39.47567 | 4  | 1 | 3 | 228919.8 | 400824.7 | 210924.8 |
| 277.1286 | 11.47946 | 11.44367 | 11.65552 | 4  | 0 | 4 | 266868.6 | 342664.9 | 351180.4 |
| 301.6314 | 29.21367 | 29.19333 | 29.32917 | 7  | 2 | 5 | 274872.6 | 664401.1 | 1025523  |
| 1089.974 | 9.460417 | 9.416233 | 9.654    | 5  | 1 | 3 | 4315333  | 1099578  | 2458730  |
| 499.7901 | 9.463983 | 9.43065  | 9.537367 | 3  | 0 | 3 | 5591359  | 574600.4 | 1150756  |
| 727.4361 | 10.66553 | 10.599   | 10.77118 | 9  | 5 | 4 | 14198064 | 26724232 | 34251363 |
| 507.0366 | 22.76783 | 22.71633 | 22.80117 | 5  | 1 | 4 | 99392.6  | 101470.7 | 168201.6 |
| 554.3974 | 27.9995  | 27.942   | 28.13683 | 9  | 4 | 5 | 120844.1 | 521798.1 | 310016.4 |
| 700.522  | 40.13642 | 40.0945  | 40.17767 | 6  | 3 | 3 | 30193.69 | 102464.5 | 84598.6  |
| 384.1798 | 22.107   | 22.079   | 22.1365  | 3  | 0 | 3 | 86068.08 | 99825.17 | 116844.8 |
| 275.037  | 28.12492 | 28.04433 | 28.16133 | 4  | 1 | 3 | 56575.83 | 113708.2 | 176828.9 |
| 814.1267 | 31.00133 | 30.95017 | 31.07383 | 6  | 1 | 5 | 208494.2 | 564343.7 | 1197502  |
| 417.3238 | 9.178658 | 9.101033 | 9.280533 | 6  | 4 | 2 | 1502633  | 3331279  | 2260370  |
| 322.9714 | 16.95833 | 16.92767 | 16.97633 | 7  | 5 | 2 | 3164099  | 656691.2 | 319798.6 |
| 676.8031 | 9.4622   | 9.444983 | 9.537367 | 4  | 1 | 3 | 6999619  | 3991500  | 8185994  |
| 466.1765 | 19.817   | 19.79067 | 20.02417 | 5  | 4 | 1 | 37969.59 | 117198   | 117465.3 |
| 373.1311 | 32.48275 | 32.37967 | 32.56617 | 8  | 3 | 5 | 1765971  | 3706273  | 7349639  |
| 423.0044 | 21.72217 | 21.69833 | 21.72567 | 3  | 0 | 3 | 41255.83 | 35386.89 | 56819.24 |
| 331.5101 | 9.463983 | 9.444983 | 9.537367 | 3  | 0 | 3 | 15410211 | 3352471  | 7114413  |
| 282.1031 | 21.70225 | 21.69333 | 21.78583 | 4  | 1 | 3 | 37477.54 | 75641    | 80893.5  |
| 636.5072 | 10.43532 | 10.35103 | 10.45412 | 8  | 3 | 5 | 3755239  | 2714047  | 3986658  |
| 492.9396 | 25.68033 | 25.64833 | 25.69883 | 6  | 1 | 5 | 187424   | 412128.8 | 902637.1 |
| 218.0603 | 21.68167 | 21.57183 | 21.6935  | 3  | 0 | 3 | 31213.14 | 56850.44 | 13652.9  |

|          |          |          |          |    |   |   |          |          |          |
|----------|----------|----------|----------|----|---|---|----------|----------|----------|
| 615.0302 | 17.20683 | 17.1625  | 17.2395  | 7  | 3 | 4 | 41119.52 | 124844.4 | 120704   |
| 266.22   | 26.08342 | 26.01917 | 26.17833 | 10 | 5 | 5 | 415954.8 | 1607488  | 1956898  |
| 396.885  | 32.32733 | 32.2965  | 32.3515  | 3  | 0 | 3 | 1174344  | 9993.832 | 14331.85 |
| 356.4745 | 9.483125 | 9.460417 | 9.537367 | 4  | 1 | 3 | 5826139  | 1775854  | 2836422  |
| 458.1831 | 20.64967 | 20.57667 | 20.76733 | 6  | 3 | 3 | 944519.5 | 964850.8 | 1128259  |
| 439.0462 | 22.1365  | 22.05267 | 22.1715  | 7  | 2 | 5 | 232258.8 | 836720.2 | 1319381  |
| 389.2923 | 34.13    | 34.11217 | 34.162   | 6  | 2 | 4 | 123113.2 | 280702.1 | 299608.1 |
| 427.3046 | 11.2544  | 11.14327 | 11.31892 | 9  | 4 | 5 | 292049.8 | 599855   | 668188.6 |
| 285.032  | 23.1945  | 23.1585  | 23.22367 | 5  | 1 | 4 | 62895.23 | 87588.86 | 107373.6 |
| 339.1054 | 32.12167 | 32.05633 | 32.20817 | 5  | 1 | 4 | 225232.8 | 893080.3 | 1314879  |
| 504.3889 | 27.66675 | 27.609   | 27.81933 | 10 | 5 | 5 | 1295683  | 7703388  | 6754642  |
| 279.1118 | 28.40525 | 28.35633 | 28.49317 | 6  | 2 | 4 | 215905.8 | 488001.9 | 309286.6 |
| 350.1025 | 9.507758 | 9.460417 | 9.545617 | 4  | 1 | 3 | 7135573  | 1536788  | 2943426  |
| 564.2513 | 24.42    | 24.41817 | 24.44517 | 3  | 0 | 3 | 221338.2 | 199677.3 | 95821.71 |
| 600.4084 | 9.457567 | 9.373117 | 9.584867 | 6  | 2 | 3 | 1130895  | 1970074  | 1660604  |
| 342.978  | 15.87564 | 15.75735 | 15.98467 | 4  | 0 | 3 | 33989.69 | 39482.94 | 78586.59 |
| 224.096  | 18.14925 | 18.08867 | 18.2155  | 6  | 4 | 2 | 73477.42 | 346048.9 | 245444.5 |
| 656.4647 | 9.500675 | 9.444983 | 9.5571   | 4  | 1 | 3 | 10684544 | 2615390  | 5469047  |
| 527.3888 | 44.01717 | 43.982   | 44.0715  | 10 | 5 | 5 | 327428.9 | 3898448  | 817242.7 |
| 585.9423 | 22.99133 | 22.928   | 23.01033 | 3  | 3 | 0 | 100153.9 | 320054.4 | 389427.9 |
| 477.1589 | 10.67382 | 10.56983 | 10.77118 | 6  | 2 | 4 | 1068995  | 1417425  | 2750450  |
| 521.0846 | 27.17867 | 27.16517 | 27.22933 | 5  | 3 | 2 | 91165.71 | 277066.8 | 406640   |
| 341.4747 | 9.537367 | 9.47815  | 9.5571   | 5  | 2 | 3 | 12252747 | 2970154  | 5076406  |
| 290.6393 | 32.12117 | 32.08783 | 32.20817 | 7  | 2 | 5 | 169844.1 | 630886.1 | 988813   |
| 1675.946 | 9.541492 | 9.506667 | 9.6125   | 4  | 1 | 3 | 4880974  | 1352797  | 2966796  |
| 621.4413 | 29.92258 | 29.90533 | 29.93117 | 10 | 5 | 5 | 861020.4 | 8432033  | 1703004  |
| 659.5496 | 9.463983 | 9.444983 | 9.537367 | 5  | 2 | 3 | 25244304 | 24651591 | 38615244 |
| 347.0906 | 16.92833 | 16.8745  | 16.96167 | 8  | 3 | 5 | 804414.4 | 1243291  | 2092949  |
| 386.9835 | 21.74033 | 21.72217 | 21.80067 | 3  | 0 | 3 | 502832.2 | 1091511  | 1529319  |
| 441.7886 | 8.904467 | 8.730367 | 8.9755   | 9  | 5 | 4 | 1562544  | 4341427  | 3908836  |
| 997.7101 | 33.73617 | 33.7135  | 33.78267 | 6  | 2 | 4 | 262281.5 | 382848.6 | 498311.4 |
| 216.4547 | 9.537367 | 9.460417 | 9.6125   | 5  | 1 | 3 | 3936344  | 1052236  | 1907262  |
| 535.0314 | 22.753   | 22.70183 | 22.78383 | 7  | 2 | 5 | 588561.4 | 843475   | 1291041  |
| 696.1909 | 30.97317 | 30.93483 | 31.07383 | 9  | 4 | 5 | 2170459  | 6219983  | 12296704 |
| 394.1471 | 25.9055  | 25.887   | 25.9325  | 5  | 1 | 4 | 79810.59 | 205898   | 263205.7 |
| 324.1987 | 14.26493 | 14.25112 | 14.2742  | 3  | 0 | 3 | 322918.8 | 122750.7 | 106487.2 |
| 636.9782 | 9.534967 | 9.43065  | 9.537367 | 3  | 0 | 3 | 1884859  | 1344388  | 2897019  |
| 445.1951 | 30.78433 | 30.73283 | 30.84967 | 4  | 0 | 4 | 147572.8 | 115555.8 | 181915   |
| 499.199  | 29.373   | 29.33233 | 29.37533 | 3  | 0 | 3 | 1481821  | 610243.2 | 1037100  |
| 331.158  | 10.75042 | 10.68362 | 10.77893 | 5  | 1 | 4 | 1535401  | 453340.6 | 595643.7 |
| 424.1738 | 13.28594 | 13.25417 | 13.31607 | 4  | 3 | 1 | 370918.5 | 1216352  | 1885819  |
| 429.7839 | 23.39817 | 23.325   | 23.42017 | 5  | 2 | 3 | 103969.6 | 243005.7 | 232042.7 |
| 342.2694 | 12.71521 | 12.66875 | 12.78712 | 8  | 3 | 5 | 222959.8 | 525115.3 | 613678   |
| 391.141  | 22.42883 | 22.37683 | 22.459   | 5  | 2 | 3 | 68854.96 | 123634.1 | 162210.4 |
| 652.2596 | 29.2135  | 29.18517 | 29.22983 | 5  | 5 | 0 | 123027.3 | 611554.5 | 475819.4 |
| 496.421  | 40.54367 | 40.52083 | 40.59767 | 10 | 5 | 5 | 980308   | 1810807  | 1121228  |
| 456.5373 | 9.463983 | 9.416233 | 9.537367 | 3  | 0 | 3 | 5588518  | 672459   | 1438272  |

|          |          |          |          |    |   |   |          |          |          |
|----------|----------|----------|----------|----|---|---|----------|----------|----------|
| 438.134  | 30.82067 | 30.74683 | 30.84933 | 5  | 1 | 4 | 71416.35 | 247158.1 | 281392.4 |
| 304.0974 | 21.708   | 21.5865  | 21.74217 | 6  | 2 | 4 | 85424.04 | 279877.1 | 365819   |
| 338.4467 | 9.55075  | 9.47815  | 9.584433 | 7  | 4 | 3 | 3313802  | 5863335  | 8587127  |
| 477.8982 | 9.448158 | 9.416233 | 9.537367 | 4  | 1 | 3 | 13417115 | 1193058  | 2617318  |
| 702.1694 | 27.4565  | 27.43983 | 27.54433 | 5  | 4 | 1 | 157565.6 | 867803.5 | 1105635  |
| 422.2369 | 20.51167 | 20.496   | 20.59983 | 3  | 0 | 3 | 58378.18 | 211473.4 | 90218.81 |
| 702.558  | 9.455275 | 9.351467 | 9.537367 | 6  | 3 | 3 | 4.56E+08 | 1.09E+08 | 95124948 |
| 622.4901 | 17.20733 | 17.1625  | 17.21933 | 5  | 4 | 1 | 94337.62 | 276937.4 | 220459   |
| 1050.572 | 9.455083 | 9.416233 | 9.537367 | 4  | 1 | 3 | 8236144  | 743501.5 | 1573624  |
| 367.8225 | 9.533425 | 9.47815  | 9.545617 | 4  | 1 | 3 | 16900270 | 1139783  | 1364801  |
| 437.3844 | 21.70067 | 21.5865  | 21.74217 | 6  | 3 | 3 | 170950   | 234028.9 | 304407.2 |
| 461.3463 | 21.51333 | 21.39833 | 21.54467 | 6  | 2 | 4 | 89633.7  | 223179.4 | 203103   |
| 158.9741 | 21.6875  | 21.57183 | 21.7275  | 8  | 4 | 4 | 239445.3 | 1182098  | 1159659  |
| 281.5057 | 9.4622   | 9.43065  | 9.537367 | 4  | 1 | 3 | 6653781  | 765308.5 | 1561586  |
| 540.4473 | 40.40867 | 40.3865  | 40.4725  | 10 | 5 | 5 | 2161735  | 3272154  | 2040640  |
| 709.4748 | 9.507367 | 9.43065  | 9.596683 | 4  | 1 | 3 | 9970813  | 10326386 | 15942203 |
| 418.2032 | 19.6915  | 19.689   | 19.74733 | 3  | 0 | 3 | 246686.8 | 224267.6 | 70259.58 |
| 611.0579 | 9.527133 | 9.506667 | 9.6125   | 4  | 1 | 3 | 4007836  | 1340990  | 2726499  |
| 464.9193 | 9.455083 | 9.416233 | 9.537367 | 4  | 1 | 3 | 2734662  | 789913.8 | 1727818  |
| 374.7932 | 12.39623 | 12.3356  | 12.42868 | 6  | 2 | 4 | 123020.9 | 322844.1 | 267632.8 |
| 688.5217 | 34.29833 | 34.24933 | 34.31533 | 10 | 5 | 5 | 15671298 | 30252715 | 32670718 |
| 657.8662 | 9.500675 | 9.460417 | 9.545617 | 4  | 1 | 3 | 4157276  | 648665.6 | 1409160  |
| 369.9342 | 28.04383 | 27.999   | 28.07317 | 7  | 3 | 4 | 110386.5 | 323156.6 | 308845   |
| 520.8689 | 33.65567 | 33.62283 | 33.6975  | 7  | 3 | 4 | 187067.4 | 585689.6 | 656437.5 |
| 217.9901 | 30.51467 | 30.48833 | 30.79183 | 5  | 2 | 3 | 112695.5 | 290741.8 | 589907.3 |
| 703.4426 | 9.899967 | 9.88085  | 9.91985  | 3  | 0 | 3 | 212185.4 | 101784.8 | 141515.2 |
| 609.9078 | 10.05278 | 9.9637   | 10.05612 | 3  | 0 | 3 | 46179.35 | 33037.48 | 58929.23 |
| 622.4036 | 9.419225 | 9.279067 | 9.529483 | 6  | 2 | 3 | 4886721  | 2158092  | 2836619  |
| 870.53   | 32.0735  | 32.02983 | 32.08683 | 3  | 3 | 0 | 102054.6 | 334902.3 | 546511.4 |
| 617.937  | 33.39117 | 33.37667 | 33.45267 | 7  | 3 | 4 | 154928.8 | 552358.8 | 562212.3 |
| 1765.029 | 9.531333 | 9.47815  | 9.537367 | 3  | 0 | 3 | 3513265  | 410265.5 | 917381.6 |
| 506.9183 | 21.67867 | 21.65233 | 21.74217 | 5  | 2 | 3 | 48464.12 | 55515.13 | 72431.28 |
| 1084.759 | 33.58958 | 33.55283 | 33.64917 | 6  | 2 | 4 | 200765.4 | 194846.2 | 283457.6 |
| 321.0464 | 9.891217 | 9.805333 | 9.932383 | 5  | 2 | 3 | 1035527  | 711633.3 | 1141502  |
| 313.6317 | 29.13992 | 29.1255  | 29.22633 | 6  | 2 | 4 | 154007.8 | 306259.3 | 497648   |
| 375.1373 | 22.64733 | 22.61983 | 22.65117 | 3  | 0 | 3 | 81305.46 | 41171.1  | 47216.47 |
| 461.3494 | 44.46625 | 44.44833 | 44.5095  | 10 | 5 | 5 | 121563.4 | 1267307  | 209272   |
| 766.1694 | 29.21517 | 29.2     | 29.22983 | 3  | 3 | 0 | 105503.5 | 250091.8 | 212881.1 |
| 536.3127 | 21.93133 | 21.8625  | 21.991   | 3  | 0 | 3 | 408691.8 | 243435.6 | 112420.4 |
| 724.9545 | 9.957467 | 9.858417 | 9.977267 | 5  | 1 | 4 | 530486.6 | 262726.8 | 417690.4 |
| 614.7109 | 9.52075  | 9.5169   | 9.537367 | 3  | 0 | 3 | 6915688  | 3294657  | 6941713  |
| 219.196  | 22.18708 | 22.18317 | 22.20867 | 6  | 4 | 2 | 501455   | 2512576  | 2766417  |
| 655.9626 | 9.500675 | 9.444983 | 9.6125   | 4  | 1 | 3 | 36300968 | 5806951  | 12324112 |
| 387.152  | 33.42683 | 33.14283 | 33.5045  | 9  | 3 | 5 | 525040.8 | 1332283  | 2688286  |
| 408.1601 | 19.70183 | 19.68183 | 19.8     | 5  | 3 | 2 | 220245.5 | 349111.5 | 328662.1 |
| 624.242  | 32.11667 | 32.04433 | 32.146   | 3  | 3 | 0 | 98905.42 | 356520.5 | 594647.3 |
| 633.4605 | 9.995367 | 9.93755  | 10.09068 | 7  | 5 | 2 | 837119.3 | 1461238  | 2235013  |

|          |          |          |          |    |   |   |          |          |          |
|----------|----------|----------|----------|----|---|---|----------|----------|----------|
| 758.1763 | 9.531333 | 9.52075  | 9.537367 | 3  | 0 | 3 | 2565142  | 937903.5 | 1929567  |
| 848.6329 | 39.38783 | 39.3505  | 39.47567 | 10 | 5 | 5 | 861882.2 | 1333410  | 1325050  |
| 256.0268 | 32.46458 | 32.39533 | 32.52517 | 6  | 2 | 4 | 258965.8 | 502280.4 | 1061523  |
| 707.9338 | 9.55645  | 9.471017 | 9.57335  | 4  | 3 | 0 | 3202103  | 5217359  | 7220808  |
| 457.0892 | 9.4622   | 9.416233 | 9.537367 | 4  | 1 | 3 | 6280554  | 641756.7 | 1349846  |
| 301.1353 | 29.238   | 29.21333 | 29.31467 | 7  | 2 | 5 | 218406.6 | 491874.4 | 715532   |
| 1672.077 | 9.497417 | 9.460417 | 9.537367 | 4  | 1 | 3 | 16025868 | 5359772  | 10969810 |
| 370.2429 | 10.41965 | 10.36523 | 10.46653 | 9  | 5 | 4 | 14890412 | 42975447 | 63575814 |
| 440.957  | 17.13542 | 17.11983 | 17.161   | 4  | 1 | 3 | 70563.92 | 100087.2 | 207739.7 |
| 289.1354 | 29.13483 | 29.11083 | 29.2115  | 5  | 1 | 4 | 93404.1  | 96447.95 | 154684.6 |
| 245.2671 | 23.18183 | 23.15183 | 23.22917 | 9  | 4 | 5 | 224755   | 343184.7 | 324085.8 |
| 704.8548 | 9.4622   | 9.444983 | 9.537367 | 4  | 1 | 3 | 20323856 | 3572028  | 7330113  |
| 760.1516 | 9.504625 | 9.460417 | 9.537367 | 4  | 1 | 3 | 7712194  | 3012614  | 6164730  |
| 537.1689 | 10.6177  | 10.58085 | 10.8219  | 5  | 1 | 3 | 186077.3 | 134631.3 | 142354.2 |
| 664.4643 | 29.88975 | 29.86    | 29.92167 | 10 | 5 | 5 | 2655114  | 26603685 | 6054772  |
| 784.4935 | 9.395833 | 9.257833 | 9.4564   | 7  | 4 | 3 | 5997772  | 2021232  | 3549000  |
| 1769.473 | 9.4881   | 9.460417 | 9.626317 | 5  | 1 | 3 | 14150111 | 2999317  | 6513683  |
| 709.1941 | 29.82467 | 29.78317 | 29.89933 | 4  | 0 | 4 | 59566.63 | 86344    | 157968.4 |
| 658.4898 | 33.85125 | 33.803   | 33.924   | 4  | 0 | 4 | 360762.5 | 3069332  | 3155787  |
| 519.9514 | 22.13642 | 22.09383 | 22.17817 | 4  | 0 | 4 | 65689.47 | 219227.6 | 300150.3 |
| 458.3657 | 12.20298 | 12.16393 | 12.2447  | 8  | 4 | 4 | 184516.6 | 440858.7 | 592843.3 |
| 834.5803 | 34.05858 | 34.02883 | 34.09767 | 6  | 2 | 4 | 161545.1 | 2123275  | 1919825  |
| 1025.741 | 38.92083 | 38.88083 | 39.001   | 4  | 1 | 3 | 65346.09 | 44960.2  | 69957.61 |
| 1773.688 | 9.537367 | 9.49235  | 9.545617 | 3  | 0 | 3 | 5750607  | 1153820  | 2544093  |
| 775.5988 | 42.38783 | 42.346   | 42.40583 | 3  | 0 | 3 | 22100.24 | 62938.7  | 35755.93 |
| 226.1804 | 15.64112 | 15.62787 | 15.65998 | 3  | 0 | 3 | 682547.3 | 4125344  | 4228238  |
| 757.4818 | 9.531333 | 9.506667 | 9.626317 | 5  | 2 | 3 | 20095418 | 7687860  | 15353814 |
| 348.1073 | 31.02683 | 30.99333 | 31.0665  | 4  | 1 | 3 | 64720.8  | 72507.3  | 162131.2 |
| 413.2306 | 21.023   | 20.9775  | 21.0485  | 6  | 3 | 3 | 584357.3 | 172615.8 | 146962.3 |
| 581.9468 | 22.99525 | 22.928   | 23.01883 | 8  | 4 | 4 | 195399   | 747666.4 | 814167.7 |
| 552.4416 | 33.85767 | 33.81483 | 33.89017 | 8  | 3 | 5 | 1343079  | 3310505  | 3625742  |
| 736.7334 | 9.463983 | 9.416233 | 9.537367 | 3  | 0 | 3 | 4821760  | 1005843  | 2094028  |
| 708.6021 | 9.463983 | 9.444983 | 9.537367 | 3  | 0 | 3 | 25183682 | 4865914  | 10477467 |
| 463.9123 | 18.12867 | 18.1235  | 18.2155  | 4  | 1 | 3 | 54483.57 | 106250   | 152332.7 |
| 457.2341 | 9.463983 | 9.43065  | 9.537367 | 3  | 0 | 3 | 7362192  | 1323601  | 2131011  |
| 683.9766 | 33.2105  | 33.15733 | 33.26167 | 6  | 2 | 4 | 137516.8 | 175012.2 | 195266.6 |
| 538.3859 | 12.04162 | 12.01037 | 12.21482 | 10 | 5 | 5 | 305357.8 | 930363   | 1011583  |
| 318.7573 | 10.43532 | 10.29972 | 10.45412 | 6  | 2 | 4 | 645005.1 | 442890.7 | 738297.2 |
| 613.344  | 9.529058 | 9.5169   | 9.6125   | 4  | 1 | 3 | 3439249  | 1577324  | 3156864  |
| 400.0146 | 15.8953  | 15.88828 | 15.90678 | 3  | 0 | 3 | 62641.18 | 153011.2 | 292343.4 |
| 772.4125 | 9.55075  | 9.4881   | 9.751083 | 5  | 2 | 3 | 5081191  | 2449891  | 3436071  |
| 267.2072 | 17.8545  | 17.79417 | 17.8785  | 7  | 3 | 4 | 49570.11 | 167772.3 | 90889.32 |
| 759.8444 | 9.52075  | 9.5169   | 9.537367 | 3  | 0 | 3 | 7131891  | 3283322  | 6983969  |
| 652.2335 | 9.4622   | 9.43065  | 9.537367 | 4  | 1 | 3 | 9427950  | 1691789  | 3401965  |
| 372.3474 | 33.47767 | 33.46617 | 33.58283 | 7  | 3 | 4 | 44735.05 | 383503.7 | 162366.4 |
| 593.0075 | 28.25317 | 28.23433 | 28.264   | 3  | 0 | 3 | 39674.98 | 47490.82 | 96144.55 |
| 499.398  | 29.50558 | 29.46233 | 29.54667 | 8  | 3 | 5 | 772108.4 | 1008259  | 1052097  |

|          |          |          |          |    |   |   |          |          |          |
|----------|----------|----------|----------|----|---|---|----------|----------|----------|
| 522.2592 | 26.122   | 26.09583 | 26.14917 | 4  | 4 | 0 | 71592.74 | 174697   | 195373.6 |
| 850.6392 | 39.39858 | 39.384   | 39.46083 | 4  | 1 | 3 | 120530.1 | 101725.8 | 123775.9 |
| 331.9925 | 9.4622   | 9.43065  | 9.537367 | 4  | 1 | 3 | 5684075  | 1177369  | 2326488  |
| 417.0286 | 22.95133 | 22.922   | 22.996   | 5  | 4 | 1 | 104570.8 | 287199.5 | 321164.8 |
| 655.5151 | 9.4622   | 9.444983 | 9.537367 | 4  | 1 | 3 | 29441664 | 5506080  | 11636619 |
| 634.7377 | 9.4622   | 9.444983 | 9.537367 | 4  | 1 | 3 | 6311675  | 3479516  | 7503764  |
| 350.6259 | 9.5169   | 9.47815  | 9.537367 | 3  | 0 | 3 | 3533001  | 962342.5 | 2081806  |
| 595.422  | 33.44708 | 33.40167 | 33.52517 | 8  | 4 | 4 | 348567.9 | 1230346  | 1293999  |
| 477.5888 | 9.44975  | 9.43065  | 9.64025  | 5  | 1 | 3 | 11868138 | 1251810  | 2657880  |
| 808.5647 | 34.16675 | 34.09767 | 34.21367 | 4  | 1 | 3 | 115779.3 | 39904.87 | 64372.97 |
| 879.3674 | 9.55075  | 9.473767 | 9.5776   | 3  | 0 | 3 | 3219237  | 2089362  | 4314616  |
| 524.1305 | 22.12717 | 22.08617 | 22.15117 | 5  | 3 | 2 | 196033.7 | 560328.7 | 711252.5 |
| 397.2858 | 9.96035  | 9.858417 | 10.1894  | 7  | 3 | 4 | 666084   | 359669.4 | 600651.9 |
| 728.0891 | 9.4622   | 9.444983 | 9.537367 | 4  | 1 | 3 | 5337241  | 3153901  | 6739643  |
| 271.0033 | 17.9355  | 17.855   | 17.97517 | 9  | 4 | 5 | 314990.2 | 923236.3 | 1141924  |
| 363.6038 | 30.28425 | 30.24433 | 30.36167 | 6  | 2 | 4 | 148280   | 280117.6 | 592547.1 |
| 365.087  | 30.79175 | 30.73283 | 30.84967 | 4  | 0 | 4 | 71960.57 | 177458.4 | 120079.8 |
| 376.2125 | 13.11618 | 13.0931  | 13.15867 | 4  | 3 | 1 | 4979607  | 9942187  | 17176515 |
| 523.4207 | 40.4015  | 40.37867 | 40.45683 | 9  | 4 | 5 | 272472.2 | 445133   | 314471.8 |
| 565.1573 | 22.11867 | 22.08617 | 22.142   | 4  | 3 | 1 | 118708.6 | 279333.3 | 340726.8 |
| 496.1686 | 22.11867 | 22.005   | 22.12717 | 6  | 3 | 3 | 161403   | 380781.7 | 444688.7 |
| 710.6779 | 9.507758 | 9.460417 | 9.545617 | 4  | 1 | 3 | 2730031  | 466273   | 715665   |
| 892.6591 | 39.26317 | 39.22933 | 39.342   | 8  | 3 | 5 | 463473.3 | 795087.3 | 829007   |
| 1671.075 | 9.537367 | 9.506667 | 9.545617 | 3  | 0 | 3 | 1923600  | 694526.2 | 1461092  |
| 432.1841 | 25.7585  | 25.7355  | 25.78633 | 4  | 0 | 4 | 173866.5 | 333645.9 | 530337.8 |
| 512.2912 | 25.86233 | 25.80817 | 25.87367 | 3  | 0 | 3 | 233913.9 | 217504.9 | 80418.14 |
| 281.4358 | 9.463983 | 9.416233 | 9.537367 | 3  | 0 | 3 | 4783468  | 477250   | 966078.6 |
| 759.2658 | 9.534967 | 9.5169   | 9.537367 | 3  | 0 | 3 | 2054126  | 889273.1 | 1932253  |
| 577.2787 | 32.10167 | 32.02667 | 32.20817 | 9  | 4 | 5 | 915271.4 | 2994882  | 4232239  |
| 321.2427 | 34.8375  | 34.807   | 34.88117 | 3  | 0 | 3 | 1440925  | 430530   | 181295.6 |
| 1038.246 | 9.489492 | 9.3803   | 9.584433 | 6  | 3 | 3 | 11614154 | 12389318 | 14512163 |
| 738.952  | 9.768258 | 9.7121   | 9.820633 | 4  | 1 | 3 | 977093.9 | 411378.1 | 677287.3 |
| 348.2631 | 9.382483 | 9.17955  | 9.532583 | 6  | 3 | 3 | 1158816  | 1306011  | 458110.4 |
| 747.2096 | 30.89283 | 30.84933 | 30.9455  | 5  | 1 | 4 | 128440.5 | 243452.9 | 510148.2 |
| 498.3559 | 29.64442 | 29.57833 | 29.66617 | 4  | 3 | 1 | 2463547  | 211883   | 201222   |
| 885.5998 | 29.72617 | 29.696   | 29.76817 | 10 | 5 | 5 | 107405.7 | 941398.4 | 152358.7 |
| 383.2978 | 9.540275 | 9.5025   | 9.598583 | 6  | 2 | 4 | 4387129  | 2676139  | 3335005  |
| 388.2296 | 9.560458 | 9.47815  | 9.61695  | 6  | 4 | 2 | 5497543  | 1983919  | 2468432  |
| 395.2165 | 9.173633 | 9.0532   | 9.2529   | 8  | 5 | 3 | 4907945  | 17240250 | 16363873 |
| 653.6212 | 9.463983 | 9.444983 | 9.64025  | 5  | 1 | 3 | 40711468 | 6713196  | 13446955 |
| 1968.231 | 9.515    | 9.473767 | 9.6125   | 5  | 2 | 3 | 24894048 | 11975363 | 11279791 |
| 804.6062 | 39.5225  | 39.49717 | 39.60933 | 10 | 5 | 5 | 1834862  | 2251494  | 1999949  |
| 250.2169 | 12.60123 | 12.58263 | 12.66212 | 7  | 3 | 4 | 505680.2 | 290486.1 | 273802.4 |
| 471.3704 | 12.72837 | 12.69882 | 12.7723  | 7  | 3 | 4 | 90202.46 | 159204.1 | 235201.5 |
| 173.1327 | 29.52017 | 29.477   | 29.53883 | 4  | 0 | 4 | 26573.75 | 175048.1 | 45499.89 |
| 552.3434 | 22.67933 | 22.65533 | 22.73233 | 3  | 0 | 3 | 411371.8 | 188701.9 | 111624.4 |
| 364.3425 | 40.78792 | 40.76017 | 40.86067 | 8  | 3 | 5 | 90721.43 | 504669.8 | 388866.1 |

|          |          |          |          |    |   |   |          |          |          |
|----------|----------|----------|----------|----|---|---|----------|----------|----------|
| 431.328  | 26.53283 | 26.48717 | 26.55617 | 5  | 1 | 4 | 69865.16 | 74790.4  | 108002.7 |
| 357.3353 | 9.500675 | 9.459367 | 9.64025  | 4  | 1 | 3 | 5903368  | 1332155  | 2366409  |
| 338.2162 | 10.42902 | 10.36523 | 10.54073 | 8  | 4 | 4 | 1336881  | 3520009  | 4118197  |
| 426.8229 | 35.042   | 34.99983 | 35.21983 | 8  | 3 | 5 | 88856.55 | 447756.5 | 271176.1 |
| 1105.672 | 10.67897 | 10.63273 | 10.77118 | 7  | 2 | 5 | 5483192  | 3393298  | 4124206  |
| 776.1856 | 29.14083 | 29.08283 | 29.17717 | 7  | 5 | 2 | 190802.8 | 703698.1 | 717400.1 |
| 485.2762 | 17.06    | 17.04867 | 17.08567 | 3  | 3 | 0 | 285860.7 | 727292.6 | 1199720  |
| 771.21   | 30.26683 | 30.24533 | 30.36167 | 7  | 2 | 5 | 279722   | 658747.4 | 1292440  |
| 647.2081 | 30.799   | 30.73283 | 30.84967 | 4  | 0 | 4 | 394314.5 | 86748.23 | 146217.3 |
| 730.9049 | 9.4622   | 9.444983 | 9.537367 | 4  | 1 | 3 | 9700003  | 5140658  | 10771083 |
| 769.558  | 12.39568 | 12.3356  | 12.444   | 8  | 4 | 4 | 144516.8 | 284655.2 | 329941.6 |
| 614.2041 | 9.53435  | 9.506667 | 9.626317 | 4  | 1 | 3 | 8156139  | 3559254  | 7116717  |
| 980.7117 | 39.01667 | 38.95917 | 39.08967 | 5  | 2 | 3 | 175992.6 | 242198.7 | 301133.9 |
| 472.3999 | 35.17592 | 35.147   | 35.235   | 8  | 3 | 5 | 115306.8 | 504605.9 | 334071.3 |
| 735.0078 | 9.463983 | 9.416233 | 9.537367 | 3  | 0 | 3 | 9616309  | 1268719  | 2676300  |
| 427.0256 | 15.89132 | 15.80385 | 15.92517 | 7  | 3 | 4 | 404630.7 | 1225063  | 2313963  |
| 746.5639 | 34.96533 | 34.92467 | 35.00867 | 6  | 2 | 4 | 849202.7 | 12777153 | 12991722 |
| 774.4968 | 9.671517 | 9.61695  | 9.71975  | 5  | 3 | 2 | 5220522  | 1077532  | 1729807  |
| 216.2284 | 9.52075  | 9.502483 | 9.537367 | 3  | 0 | 3 | 9188429  | 4606560  | 9658921  |
| 759.388  | 20.15867 | 20.13583 | 20.31433 | 5  | 3 | 2 | 560134.3 | 1351832  | 2168271  |
| 477.8603 | 39.13083 | 39.05983 | 39.223   | 5  | 2 | 3 | 92169.8  | 169734.2 | 142251   |
| 289.608  | 10.68843 | 10.63528 | 10.76465 | 4  | 1 | 3 | 688919.4 | 1211780  | 1814644  |
| 538.0464 | 30.77658 | 30.48833 | 30.82083 | 4  | 1 | 3 | 90708.01 | 204568   | 435940.2 |
| 1010.022 | 9.4622   | 9.416233 | 9.537367 | 4  | 1 | 3 | 3069576  | 1112616  | 2401868  |
| 761.031  | 9.537367 | 9.534967 | 9.560017 | 3  | 0 | 3 | 2147809  | 1193158  | 2513147  |
| 383.2046 | 31.08133 | 31.00267 | 31.12567 | 9  | 5 | 4 | 571869.8 | 2037045  | 2597666  |
| 859.5705 | 21.264   | 21.15667 | 21.28167 | 9  | 4 | 5 | 137971.3 | 335573.8 | 513950.9 |
| 526.8826 | 10.10657 | 9.9907   | 10.1429  | 7  | 3 | 4 | 420320.2 | 213738.5 | 377570.9 |
| 357.057  | 9.507758 | 9.444983 | 9.64025  | 4  | 1 | 3 | 6837124  | 1686983  | 2792241  |
| 464.422  | 18.75133 | 18.73317 | 18.77533 | 5  | 2 | 3 | 42017.4  | 53060.13 | 67587.59 |
| 683.2487 | 9.4622   | 9.444983 | 9.537367 | 4  | 1 | 3 | 9813224  | 5506531  | 11374940 |
| 1024.738 | 38.92667 | 38.89583 | 39.001   | 4  | 1 | 3 | 103632.8 | 127092.1 | 168387.7 |
| 659.4931 | 28.22033 | 28.13217 | 28.3175  | 9  | 4 | 5 | 316567.7 | 1343391  | 558960.1 |
| 537.3178 | 38.61517 | 38.6035  | 38.63167 | 7  | 4 | 3 | 416639.2 | 448060.6 | 393304.9 |
| 437.3478 | 31.74858 | 31.7245  | 31.77267 | 8  | 3 | 5 | 291072.2 | 563960.1 | 505813.3 |
| 602.2914 | 33.46308 | 33.38417 | 33.58283 | 4  | 1 | 3 | 48471.3  | 352815.1 | 97932.41 |
| 287.2012 | 26.56325 | 26.47217 | 26.5875  | 6  | 3 | 3 | 267926.8 | 1091846  | 990826   |
| 609.7954 | 10.6797  | 10.62083 | 10.72138 | 5  | 1 | 3 | 494791.5 | 336279.1 | 550771.2 |
| 1044.321 | 9.460417 | 9.43065  | 9.64025  | 5  | 1 | 3 | 28049092 | 3238353  | 7078755  |
| 484.3328 | 28.564   | 28.5135  | 28.74767 | 7  | 4 | 3 | 106965.9 | 377712.1 | 283443.5 |
| 432.1837 | 23.64933 | 23.61883 | 23.66267 | 3  | 0 | 3 | 8566479  | 13889990 | 17173626 |
| 632.0211 | 10.86477 | 10.81753 | 10.93685 | 9  | 4 | 5 | 611282.9 | 971426.2 | 1481645  |
| 440.3588 | 24.40133 | 24.33983 | 24.40717 | 5  | 3 | 2 | 52403.16 | 183989.3 | 322453.8 |
| 689.525  | 34.301   | 34.24933 | 34.31533 | 10 | 5 | 5 | 6175629  | 10954332 | 12000779 |
| 442.1735 | 9.65795  | 9.188017 | 9.7372   | 9  | 3 | 5 | 13243194 | 14055665 | 24336173 |
| 1004.625 | 9.675942 | 9.644783 | 9.7372   | 4  | 1 | 3 | 1108914  | 722667.4 | 1247853  |
| 760.1779 | 30.27592 | 30.25217 | 30.36167 | 4  | 1 | 3 | 216917.8 | 127542.1 | 235105.8 |

|          |          |          |          |    |   |   |          |          |          |
|----------|----------|----------|----------|----|---|---|----------|----------|----------|
| 457.3067 | 27.45733 | 27.4245  | 27.47783 | 5  | 3 | 2 | 139789.3 | 81918.25 | 61756.68 |
| 490.038  | 9.460417 | 9.43065  | 9.64025  | 5  | 1 | 3 | 8828032  | 2427676  | 5298912  |
| 269.1909 | 10.69564 | 10.64867 | 10.77893 | 6  | 2 | 4 | 238008.5 | 708389.3 | 537625   |
| 639.4486 | 33.32317 | 33.296   | 33.3795  | 9  | 4 | 5 | 221956.7 | 702007.9 | 725694.8 |
| 587.5079 | 38.12892 | 38.11483 | 38.28783 | 4  | 3 | 1 | 30882.16 | 149508.9 | 131587.7 |
| 790.4927 | 10.10657 | 10.08285 | 10.1147  | 5  | 2 | 3 | 607514.3 | 258492.6 | 444153.1 |
| 327.1969 | 10.66787 | 10.58428 | 10.75237 | 9  | 4 | 5 | 946739.1 | 3155449  | 3689095  |
| 491.32   | 8.905742 | 8.690483 | 9.031133 | 6  | 4 | 2 | 13794502 | 57689346 | 71626995 |
| 508.3723 | 33.7435  | 33.728   | 33.78267 | 6  | 2 | 4 | 168129.3 | 342309.9 | 386690.3 |
| 313.6491 | 32.714   | 32.68583 | 32.84617 | 7  | 2 | 5 | 179769.7 | 409988.4 | 866787   |
| 404.3454 | 44.0005  | 43.982   | 44.05567 | 8  | 5 | 3 | 298862   | 1432147  | 1656846  |
| 657.1421 | 28.45267 | 28.40983 | 28.50817 | 3  | 0 | 3 | 43128.45 | 35059.57 | 52875.47 |
| 907.6785 | 29.55367 | 29.485   | 29.66617 | 5  | 2 | 3 | 74246.63 | 419042.7 | 521724   |
| 629.2969 | 31.45892 | 31.40183 | 31.4795  | 4  | 3 | 1 | 34554.59 | 115643.6 | 100999.2 |
| 661.9635 | 33.23417 | 33.19183 | 33.32083 | 7  | 3 | 4 | 119690.8 | 289866.4 | 331813.4 |
| 1668.217 | 9.515    | 9.460417 | 9.537367 | 5  | 2 | 3 | 42392296 | 12086992 | 24869840 |
| 750.7871 | 23.00492 | 22.97417 | 23.01883 | 4  | 1 | 3 | 84366.44 | 134565.8 | 287117.8 |
| 479.4045 | 11.09358 | 11.00948 | 11.20103 | 9  | 5 | 4 | 319798.6 | 549389.9 | 734011.4 |
| 288.2901 | 23.01975 | 22.97683 | 23.0335  | 10 | 5 | 5 | 2241093  | 8191932  | 7759140  |
| 981.7151 | 39.01208 | 38.9865  | 39.10433 | 6  | 2 | 4 | 102928.2 | 87157.98 | 144942.1 |
| 459.2801 | 8.972633 | 8.800333 | 9.04085  | 4  | 3 | 1 | 637901   | 1268504  | 1500744  |
| 672.8957 | 9.4622   | 9.43065  | 9.537367 | 4  | 1 | 3 | 4630151  | 2765146  | 5080965  |
| 389.2306 | 34.176   | 34.1715  | 34.23067 | 3  | 0 | 3 | 44229.04 | 37278.47 | 11038.98 |
| 457.3789 | 9.455275 | 9.416233 | 9.537367 | 4  | 1 | 3 | 5388793  | 673934.7 | 1434794  |
| 479.3944 | 40.5475  | 40.502   | 40.59767 | 9  | 4 | 5 | 190943.5 | 468519.4 | 318507.3 |
| 663.9675 | 18.11933 | 18.08867 | 18.16983 | 4  | 1 | 3 | 50515.86 | 46819.35 | 82341.52 |
| 770.2065 | 30.27267 | 30.25217 | 30.34733 | 8  | 3 | 5 | 775746.8 | 1927693  | 3797760  |
| 497.4247 | 40.53983 | 40.53267 | 40.5895  | 7  | 3 | 4 | 257628.3 | 406707   | 294145.6 |
| 362.6038 | 30.26633 | 30.24533 | 30.34733 | 7  | 2 | 5 | 630289.6 | 1290298  | 2807989  |
| 490.6517 | 9.4622   | 9.416233 | 9.537367 | 4  | 1 | 3 | 2973881  | 945967.5 | 2091223  |
| 650.487  | 9.892558 | 9.852767 | 9.932383 | 8  | 4 | 4 | 211569.8 | 248515.3 | 297605.1 |
| 542.8822 | 33.60467 | 33.57067 | 33.64    | 7  | 3 | 4 | 124392.7 | 388874   | 428240.7 |
| 654.0672 | 9.455275 | 9.444983 | 9.537367 | 4  | 1 | 3 | 49754420 | 9155909  | 18980956 |
| 654.5671 | 9.455275 | 9.444983 | 9.537367 | 4  | 1 | 3 | 46624092 | 8699942  | 17977448 |
| 432.8176 | 33.9645  | 33.7995  | 33.99433 | 9  | 4 | 5 | 585113.6 | 1618012  | 1813967  |
| 507.1702 | 29.65167 | 29.593   | 29.681   | 8  | 5 | 3 | 140930.9 | 651742.4 | 538721   |
| 445.1738 | 38.8755  | 38.82383 | 38.88283 | 3  | 0 | 3 | 39258.57 | 57234.98 | 29412.46 |
| 849.6362 | 39.387   | 39.36267 | 39.47567 | 9  | 4 | 5 | 383048.1 | 546231.3 | 574253.2 |
| 281.069  | 15.88591 | 15.85927 | 15.98467 | 4  | 0 | 3 | 1952199  | 8588277  | 12476749 |
| 790.9941 | 10.10978 | 10.08522 | 10.1147  | 4  | 1 | 3 | 432629.1 | 235340.3 | 395788   |
| 1042.416 | 9.460417 | 9.416233 | 9.64025  | 5  | 1 | 3 | 11262805 | 1105566  | 2169289  |
| 488.6539 | 9.4622   | 9.416233 | 9.537367 | 4  | 1 | 3 | 3310752  | 1360376  | 1918653  |
| 635.4771 | 10.77888 | 10.69405 | 10.81205 | 6  | 3 | 3 | 152664.5 | 221984.6 | 250427.2 |
| 369.7197 | 9.541233 | 9.48745  | 9.626317 | 9  | 5 | 4 | 20027472 | 29933149 | 47560591 |
| 733.4341 | 9.5393   | 9.4881   | 9.584433 | 6  | 3 | 3 | 49433932 | 48557205 | 89568727 |
| 760.3901 | 17.79417 | 17.76767 | 17.81067 | 5  | 3 | 2 | 1043897  | 3188290  | 5397178  |
| 806.6128 | 39.51625 | 39.50583 | 39.60933 | 6  | 2 | 4 | 178503.3 | 165511.7 | 174824.7 |



|          |          |          |          |    |   |   |          |          |          |
|----------|----------|----------|----------|----|---|---|----------|----------|----------|
| 844.0869 | 42.261   | 42.2435  | 42.33    | 7  | 3 | 4 | 72529.02 | 424650.9 | 219156.9 |
| 439.1789 | 38.87183 | 38.80933 | 38.8975  | 4  | 0 | 4 | 40110.93 | 111396.2 | 34725.73 |
| 350.0812 | 9.4622   | 9.43065  | 9.537367 | 4  | 1 | 3 | 8894988  | 2107981  | 4233123  |
| 443.333  | 10.61111 | 10.51342 | 10.66402 | 6  | 4 | 2 | 174719.6 | 185333   | 237323.8 |
| 294.2434 | 12.79559 | 12.77303 | 12.89353 | 8  | 3 | 5 | 622739.1 | 955191.1 | 1012484  |
| 319.2729 | 8.98005  | 8.817733 | 9.031133 | 7  | 5 | 2 | 1249322  | 1630658  | 2120930  |
| 620.5121 | 9.948267 | 9.911233 | 9.9629   | 6  | 3 | 3 | 3260245  | 3572042  | 4430707  |
| 515.1375 | 19.75175 | 19.73317 | 19.77517 | 4  | 1 | 3 | 60885.98 | 48175.72 | 96847.26 |
| 366.4263 | 9.475958 | 9.460417 | 9.537367 | 4  | 1 | 3 | 29565742 | 8289931  | 16709538 |
| 694.5329 | 9.777783 | 9.73415  | 9.808167 | 9  | 5 | 4 | 708230.6 | 1278438  | 1681257  |
| 653.176  | 9.463983 | 9.444983 | 9.64025  | 5  | 1 | 3 | 25258182 | 4678959  | 9636277  |
| 420.1321 | 28.14283 | 28.04433 | 28.162   | 6  | 2 | 4 | 59987.84 | 124113.9 | 157820.9 |
| 1758.104 | 9.527133 | 9.506667 | 9.626317 | 4  | 1 | 3 | 2431428  | 2103078  | 4509386  |
| 288.6338 | 29.12592 | 29.05083 | 29.22633 | 8  | 3 | 5 | 236796.8 | 542951.2 | 828779.3 |
| 525.185  | 10.70767 | 10.66397 | 10.75237 | 5  | 2 | 3 | 513961.6 | 979871.8 | 1219244  |
| 759.3874 | 17.79542 | 17.7835  | 17.80417 | 6  | 3 | 3 | 2324178  | 7203480  | 12108947 |
| 606.4394 | 43.58967 | 43.563   | 43.63067 | 5  | 1 | 4 | 76143.86 | 297105.2 | 114038.6 |
| 349.9069 | 9.500675 | 9.460417 | 9.545617 | 4  | 1 | 3 | 13964573 | 3153064  | 6652242  |
| 1120.682 | 9.4402   | 9.209683 | 9.654    | 8  | 2 | 5 | 52659400 | 21151538 | 40884280 |
| 704.3557 | 9.463983 | 9.43065  | 9.537367 | 3  | 0 | 3 | 24748478 | 5640668  | 11234085 |
| 805.6097 | 39.52083 | 39.4815  | 39.60933 | 9  | 4 | 5 | 718615.8 | 921600   | 871766.6 |
| 459.5264 | 29.24233 | 29.228   | 29.29983 | 5  | 1 | 4 | 139557.3 | 196217.7 | 423916.1 |
| 455.8475 | 39.268   | 39.2555  | 39.327   | 5  | 1 | 4 | 87582.8  | 125555.1 | 142801.2 |
| 431.2919 | 21.25508 | 21.15667 | 21.28517 | 4  | 1 | 3 | 52522.63 | 58712.48 | 81675.01 |
| 1043.821 | 9.455083 | 9.43065  | 9.537367 | 4  | 1 | 3 | 22922362 | 2522460  | 5498198  |
| 374.1346 | 32.45725 | 32.37967 | 32.52517 | 6  | 2 | 4 | 222300.5 | 459397.3 | 904444.6 |
| 348.2255 | 28.894   | 28.8675  | 28.951   | 5  | 0 | 5 | 212769.7 | 634452.9 | 218442.8 |
| 709.6085 | 9.4622   | 9.416233 | 9.537367 | 4  | 1 | 3 | 11841486 | 2090712  | 4491638  |
| 343.5769 | 16.72233 | 16.67383 | 16.95267 | 7  | 2 | 5 | 422350.9 | 2729516  | 3975916  |
| 216.0487 | 9.515    | 9.49235  | 9.626317 | 5  | 2 | 3 | 19851158 | 8228310  | 16739263 |
| 686.768  | 9.4622   | 9.43065  | 9.537367 | 4  | 1 | 3 | 5326132  | 3418198  | 7330007  |
| 308.2073 | 28.162   | 28.02967 | 28.191   | 5  | 2 | 3 | 320453.1 | 1136718  | 1182292  |
| 598.4533 | 37.6575  | 37.622   | 37.78317 | 10 | 5 | 5 | 245598.8 | 1085043  | 1131913  |
| 1656.719 | 9.507758 | 9.444983 | 9.626317 | 4  | 1 | 3 | 23722328 | 7206065  | 14683282 |
| 331.831  | 9.4622   | 9.444983 | 9.537367 | 4  | 1 | 3 | 5270137  | 4373179  | 3016239  |
| 378.5351 | 28.39517 | 28.368   | 28.50817 | 5  | 1 | 4 | 101178.8 | 52129.71 | 116565.6 |
| 378.24   | 9.47815  | 9.444983 | 9.626317 | 5  | 1 | 3 | 8095666  | 4148375  | 4616266  |
| 489.2651 | 9.537367 | 9.44975  | 9.620217 | 7  | 2 | 3 | 7978670  | 4861537  | 4229632  |
| 407.2911 | 17.60433 | 17.60433 | 17.60433 | 3  | 0 | 3 | 142883.8 | 290722.8 | 372886.4 |
| 332.0936 | 26.24075 | 26.173   | 26.31783 | 6  | 1 | 5 | 108514.9 | 221039.5 | 403455   |
| 479.4044 | 19.69017 | 19.66067 | 19.7825  | 9  | 4 | 5 | 277316.1 | 695646.4 | 679970.9 |
| 609.9896 | 9.537367 | 9.506667 | 9.560017 | 3  | 0 | 3 | 2372175  | 513580.2 | 1118785  |
| 510.0334 | 42.70625 | 42.68083 | 42.77283 | 10 | 5 | 5 | 119611.1 | 1142134  | 280900.9 |
| 708.5122 | 10.12622 | 10.052   | 10.15928 | 8  | 5 | 3 | 308878.6 | 324973.2 | 405274.4 |
| 283.1192 | 28.9745  | 28.929   | 28.98033 | 4  | 1 | 3 | 34997.8  | 119692.3 | 63169.05 |
| 685.3503 | 20.22517 | 20.20567 | 20.374   | 7  | 3 | 4 | 84683.01 | 206727.8 | 222121   |
| 305.2392 | 33.15725 | 33.15433 | 33.17267 | 4  | 0 | 4 | 480272   | 1237144  | 1520324  |

|          |          |          |          |    |   |   |          |          |          |
|----------|----------|----------|----------|----|---|---|----------|----------|----------|
| 391.1092 | 31.5645  | 31.48483 | 31.6005  | 10 | 5 | 5 | 158279.3 | 926021.6 | 505193.7 |
| 993.6797 | 30.93717 | 30.92133 | 31.0515  | 5  | 4 | 1 | 251254.5 | 565108.4 | 840363.9 |
| 659.9947 | 28.20567 | 28.14683 | 28.30183 | 7  | 3 | 4 | 285759.7 | 1036675  | 312671.3 |
| 599.4565 | 37.68333 | 37.631   | 37.78317 | 7  | 3 | 4 | 67223.53 | 283570.3 | 303666.1 |
| 658.4133 | 9.827958 | 9.7192   | 9.862433 | 4  | 3 | 1 | 849137.6 | 331860.9 | 449095.2 |
| 349.7112 | 9.4622   | 9.43065  | 9.537367 | 4  | 1 | 3 | 7086600  | 2013221  | 2793660  |
| 756.4886 | 11.22369 | 11.20932 | 11.22767 | 4  | 1 | 3 | 257286.8 | 178156.4 | 302033.6 |
| 760.5798 | 39.6695  | 39.63867 | 39.7435  | 10 | 5 | 5 | 3091612  | 3931427  | 3150540  |
| 551.2353 | 9.231383 | 9.079183 | 9.322017 | 7  | 4 | 3 | 1600379  | 2660601  | 3126259  |
| 602.376  | 11.30655 | 11.2838  | 11.31382 | 5  | 1 | 4 | 58472.34 | 91777.92 | 116763.9 |
| 782.2671 | 31.30767 | 31.29083 | 31.32883 | 4  | 0 | 4 | 470127.4 | 0        | 0        |
| 1986.07  | 9.523167 | 9.49235  | 9.537367 | 4  | 1 | 3 | 1769747  | 860306.8 | 892503.1 |
| 442.3382 | 11.77848 | 11.75558 | 11.99272 | 7  | 3 | 4 | 152169.6 | 659273.7 | 969831.2 |
| 686.288  | 9.4622   | 9.43065  | 9.537367 | 4  | 1 | 3 | 6714019  | 3979047  | 8416896  |
| 540.1797 | 29.62975 | 29.57833 | 29.66683 | 4  | 1 | 3 | 73049.63 | 53907.22 | 98069.18 |
| 377.744  | 9.537367 | 9.47815  | 9.545617 | 3  | 0 | 3 | 2023710  | 1330365  | 2158742  |
| 216.5002 | 9.536167 | 9.5169   | 9.6125   | 4  | 1 | 3 | 4922117  | 1465152  | 2829270  |
| 316.1648 | 9.534967 | 9.5169   | 9.537367 | 3  | 0 | 3 | 1989762  | 1712535  | 3107153  |
| 433.8339 | 39.384   | 39.3355  | 39.47567 | 5  | 2 | 3 | 103676.4 | 142342.7 | 71893.75 |
| 439.175  | 9.677742 | 9.43065  | 9.71975  | 6  | 1 | 4 | 2799799  | 3262885  | 4784226  |
| 363.092  | 10.61858 | 10.55978 | 10.74918 | 3  | 3 | 0 | 251384.5 | 247001.6 | 271451.5 |
| 637.5108 | 10.44323 | 10.36803 | 10.49713 | 6  | 3 | 3 | 1426928  | 829924.6 | 1471783  |
| 1119.679 | 9.455083 | 9.365883 | 9.654    | 8  | 3 | 4 | 90741856 | 35188353 | 68073950 |
| 253.4106 | 13.1116  | 13.09522 | 13.17963 | 4  | 1 | 3 | 18540.84 | 37156.68 | 46578.49 |
| 980.527  | 41.23733 | 41.22267 | 41.2675  | 3  | 3 | 0 | 43914.46 | 129911.5 | 159824   |
| 476.4109 | 9.448158 | 9.43065  | 9.537367 | 4  | 1 | 3 | 16145844 | 2249651  | 4294160  |
| 647.504  | 34.38008 | 34.36367 | 34.408   | 6  | 3 | 3 | 190459.7 | 208780.7 | 124896.7 |
| 1122.685 | 9.425808 | 9.33635  | 9.460417 | 4  | 1 | 3 | 8492306  | 2434925  | 4019612  |
| 498.3947 | 29.50725 | 29.46233 | 29.54667 | 8  | 3 | 5 | 2463547  | 3563434  | 3650136  |
| 386.3418 | 23.59067 | 23.561   | 23.63467 | 5  | 3 | 2 | 773254.8 | 699308.6 | 735006.3 |
| 824.3464 | 10.64867 | 10.58428 | 10.7167  | 5  | 3 | 2 | 577409.8 | 333665.9 | 316912.9 |
| 731.3801 | 9.4622   | 9.43065  | 9.577883 | 4  | 1 | 3 | 8097409  | 4940075  | 9219710  |
| 356.6759 | 9.507758 | 9.444983 | 9.64025  | 4  | 1 | 3 | 8231875  | 2171322  | 3292240  |
| 187.0418 | 21.68017 | 21.557   | 21.71283 | 6  | 2 | 4 | 112368.1 | 270561.2 | 132349.3 |
| 893.6622 | 39.25833 | 39.22933 | 39.342   | 7  | 2 | 5 | 201444.1 | 345477.3 | 389836.5 |
| 327.3014 | 26.72583 | 26.70883 | 26.7595  | 6  | 3 | 3 | 43432.81 | 179880.6 | 138534.7 |
| 416.2151 | 24.54242 | 24.38983 | 24.646   | 4  | 3 | 1 | 451510.2 | 2627145  | 2906608  |
| 357.8981 | 9.47815  | 9.459367 | 9.537367 | 3  | 0 | 3 | 6118426  | 1639283  | 3264769  |
| 468.1917 | 10.64343 | 10.63273 | 10.67897 | 4  | 1 | 3 | 4894972  | 5228957  | 9819990  |
| 301.1415 | 30.47117 | 30.34733 | 30.51183 | 7  | 3 | 4 | 4917737  | 28987249 | 31971050 |
| 423.2805 | 19.79    | 19.75333 | 19.887   | 9  | 4 | 5 | 328707.1 | 1171422  | 1678736  |
| 467.1681 | 17.1345  | 17.03717 | 17.1625  | 5  | 2 | 3 | 118880.6 | 181453.6 | 319709.3 |
| 573.4085 | 33.511   | 33.447   | 33.56833 | 9  | 5 | 4 | 468882.5 | 1589152  | 1694816  |
| 1981.074 | 9.496575 | 9.473767 | 9.537367 | 4  | 1 | 3 | 6206128  | 3907320  | 4607673  |
| 427.8064 | 11.25389 | 11.21977 | 11.27073 | 6  | 2 | 4 | 143704.5 | 258996.9 | 320204.1 |
| 443.3159 | 43.46283 | 43.41083 | 43.4785  | 4  | 3 | 1 | 50008.21 | 215051   | 125439.8 |
| 839.3709 | 10.69328 | 10.67897 | 10.77118 | 4  | 1 | 3 | 862990.9 | 1488529  | 2563708  |

|          |          |          |          |    |   |   |          |          |          |
|----------|----------|----------|----------|----|---|---|----------|----------|----------|
| 1765.271 | 9.469283 | 9.444983 | 9.537367 | 4  | 1 | 3 | 16320946 | 3882230  | 8215710  |
| 573.3394 | 30.61667 | 30.56033 | 30.64267 | 7  | 3 | 4 | 84562.73 | 350405.9 | 287647.9 |
| 682.1752 | 28.58517 | 28.54167 | 28.67283 | 7  | 2 | 5 | 141119.2 | 387219.3 | 582979.4 |
| 377.2157 | 13.0931  | 13.08017 | 13.13715 | 3  | 3 | 0 | 1004085  | 1826144  | 3247520  |
| 1006.875 | 9.455083 | 9.43065  | 9.537367 | 4  | 1 | 3 | 7685295  | 2025701  | 4169518  |
| 499.2367 | 17.67042 | 17.64817 | 17.7365  | 4  | 1 | 3 | 56585.29 | 94063.65 | 119354.7 |
| 295.0268 | 21.40783 | 21.31517 | 21.4785  | 3  | 0 | 3 | 66292.91 | 195291.6 | 250317   |
| 520.135  | 22.11583 | 22.05267 | 22.1365  | 7  | 3 | 4 | 384920.1 | 1504214  | 1891904  |
| 331.1693 | 9.500675 | 9.460417 | 9.545617 | 4  | 1 | 3 | 18185620 | 5060411  | 7782624  |
| 395.7648 | 21.47633 | 21.3425  | 21.49983 | 5  | 2 | 3 | 104516   | 230195.8 | 251933.2 |
| 715.5217 | 34.2135  | 34.16617 | 34.24533 | 9  | 4 | 5 | 230971.2 | 497912   | 610779.7 |
| 650.8617 | 22.98917 | 22.97417 | 23.01883 | 7  | 2 | 5 | 342382.3 | 702445.8 | 1408574  |
| 478.4011 | 19.68833 | 19.66067 | 19.7825  | 10 | 5 | 5 | 1152485  | 2900928  | 2770709  |
| 471.3782 | 15.88777 | 15.82902 | 15.91743 | 6  | 2 | 4 | 37723.3  | 68909.85 | 73205.11 |
| 404.1161 | 21.96992 | 21.87817 | 21.979   | 4  | 1 | 3 | 97064.2  | 240247.8 | 327578.9 |
| 515.2059 | 10.38857 | 10.3514  | 10.40805 | 4  | 1 | 3 | 1395015  | 1099344  | 1546804  |
| 559.997  | 32.143   | 32.05867 | 32.1605  | 6  | 1 | 5 | 67963.74 | 145194.6 | 316719.6 |
| 473.4034 | 35.17517 | 35.103   | 35.19117 | 5  | 1 | 4 | 44888.41 | 69479.24 | 68358.42 |
| 1085.917 | 9.455083 | 9.43065  | 9.537367 | 4  | 1 | 3 | 7487823  | 2040234  | 4493127  |
| 350.2338 | 9.515    | 9.460417 | 9.608783 | 5  | 3 | 2 | 2715915  | 1629288  | 1213240  |
| 546.3858 | 28.19183 | 28.11883 | 28.2065  | 5  | 3 | 2 | 131100.6 | 333796.5 | 518533.9 |
| 451.7173 | 30.37042 | 30.36167 | 30.38367 | 4  | 1 | 3 | 156066.7 | 153068.5 | 326244.3 |
| 1004.127 | 9.4622   | 9.416233 | 9.537367 | 4  | 1 | 3 | 3540519  | 1193902  | 2495362  |
| 363.9906 | 21.6895  | 21.62317 | 21.69833 | 6  | 2 | 4 | 100690.6 | 107382.1 | 174332.9 |
| 512.4102 | 30.28883 | 30.2745  | 30.32317 | 8  | 3 | 5 | 652502.6 | 733283.1 | 717522.6 |
| 696.5201 | 9.2651   | 9.050317 | 9.444983 | 7  | 3 | 3 | 2002797  | 1972056  | 2337084  |
| 673.827  | 9.500675 | 9.43065  | 9.543383 | 4  | 1 | 3 | 10223439 | 5485443  | 11874920 |
| 330.8483 | 9.497658 | 9.460417 | 9.537367 | 4  | 1 | 3 | 8628539  | 1969059  | 4222252  |
| 390.1114 | 31.56475 | 31.48483 | 31.6005  | 10 | 5 | 5 | 222209   | 1328137  | 709298.2 |
| 633.8347 | 9.469283 | 9.43065  | 9.537367 | 4  | 1 | 3 | 3355433  | 2009432  | 4256317  |
| 1660.539 | 9.504742 | 9.460417 | 9.537367 | 4  | 1 | 3 | 57030628 | 18611970 | 36258222 |
| 1084.954 | 9.455275 | 9.416233 | 9.537367 | 4  | 1 | 3 | 2097201  | 716440.1 | 1582803  |
| 473.2776 | 23.07317 | 23.0335  | 23.07517 | 3  | 0 | 3 | 25324.52 | 38965.98 | 53570.49 |
| 489.4252 | 9.460417 | 9.43065  | 9.64025  | 5  | 1 | 3 | 10484446 | 2914112  | 6339594  |
| 1007.736 | 9.460417 | 9.43065  | 9.64025  | 5  | 1 | 3 | 7449043  | 2211085  | 4190493  |
| 602.2567 | 29.19958 | 29.16983 | 29.31467 | 6  | 3 | 3 | 172554.9 | 609617.4 | 522254.1 |
| 818.5857 | 39.51333 | 39.48567 | 39.62433 | 3  | 0 | 3 | 32067.61 | 186524.2 | 44123.25 |
| 330.1704 | 30.44908 | 30.34733 | 30.4965  | 10 | 5 | 5 | 700706.4 | 1596317  | 1519466  |
| 1008.684 | 9.455083 | 9.416233 | 9.537367 | 4  | 1 | 3 | 6807187  | 1891429  | 4140950  |
| 1581.49  | 9.483058 | 9.460417 | 9.537367 | 4  | 1 | 3 | 5980645  | 5266870  | 11077807 |
| 703.6014 | 9.500283 | 9.444983 | 9.626317 | 5  | 2 | 3 | 42763556 | 28755908 | 40437446 |
| 346.2107 | 10.68163 | 10.62147 | 10.77118 | 6  | 2 | 4 | 134870.4 | 308893.9 | 334157.6 |
| 349.5371 | 9.490442 | 9.460417 | 9.537367 | 4  | 1 | 3 | 11635583 | 3439235  | 6621969  |
| 360.3828 | 9.5646   | 9.444983 | 9.626317 | 4  | 1 | 3 | 1466279  | 504999.2 | 892996.8 |
| 309.1268 | 25.68575 | 25.64683 | 25.7215  | 10 | 5 | 5 | 5731003  | 16348507 | 29427883 |
| 489.8774 | 9.460417 | 9.43065  | 9.64025  | 5  | 1 | 3 | 6800483  | 1878833  | 4005649  |
| 426.2311 | 22.17483 | 22.10033 | 22.1945  | 6  | 2 | 4 | 440985   | 1597809  | 1780168  |

|          |          |          |          |    |   |   |          |          |          |
|----------|----------|----------|----------|----|---|---|----------|----------|----------|
| 1761.978 | 9.541492 | 9.47815  | 9.64025  | 4  | 1 | 3 | 5756483  | 1149311  | 2449678  |
| 683.7253 | 9.4622   | 9.43065  | 9.537367 | 4  | 1 | 3 | 8475489  | 4951751  | 9383148  |
| 347.1522 | 28.22033 | 28.183   | 28.23483 | 7  | 2 | 5 | 665507.5 | 2197693  | 3581865  |
| 457.3042 | 29.66633 | 29.56383 | 29.70933 | 4  | 3 | 1 | 30430.33 | 130863.6 | 112299.7 |
| 385.2616 | 23.2995  | 23.28683 | 23.326   | 3  | 0 | 3 | 50808040 | 1.87E+08 | 1.84E+08 |
| 554.427  | 37.7985  | 37.73517 | 37.8885  | 10 | 5 | 5 | 132903.9 | 711214.1 | 741249.8 |
| 495.0874 | 18.64542 | 18.64083 | 18.66783 | 6  | 2 | 4 | 1508844  | 4398125  | 7424663  |
| 359.9962 | 9.483542 | 9.43065  | 9.537367 | 4  | 1 | 3 | 2806697  | 2308221  | 4327307  |
| 289.2935 | 23.01783 | 22.98717 | 23.0335  | 10 | 5 | 5 | 347557.9 | 1055950  | 1041559  |
| 675.4772 | 38.14917 | 38.0825  | 38.28067 | 4  | 1 | 3 | 31716.18 | 66014.94 | 52414.77 |
| 740.4666 | 9.240408 | 9.064433 | 9.392917 | 6  | 2 | 3 | 3188456  | 1906277  | 3275793  |
| 1766.166 | 9.531333 | 9.47815  | 9.537367 | 3  | 0 | 3 | 5170435  | 1072813  | 2332881  |
| 1121.683 | 9.438608 | 9.365883 | 9.617883 | 6  | 2 | 4 | 20797886 | 11032762 | 21624076 |
| 401.0185 | 22.1365  | 22.05267 | 22.18633 | 7  | 2 | 5 | 720298.9 | 2839418  | 4661291  |
| 501.3402 | 35.74642 | 35.71617 | 35.785   | 4  | 1 | 3 | 40766.98 | 218091.7 | 167096.4 |
| 301.6439 | 30.956   | 30.78683 | 31.12217 | 10 | 5 | 3 | 111518.5 | 229371.3 | 236108   |
| 216.0951 | 9.522017 | 9.460417 | 9.545617 | 4  | 1 | 3 | 7877437  | 2664540  | 4965341  |
| 388.2537 | 9.657717 | 9.188017 | 9.7372   | 11 | 4 | 5 | 58917056 | 1.2E+08  | 1.19E+08 |
| 291.0894 | 11.70939 | 11.68208 | 11.8781  | 4  | 1 | 3 | 133538.8 | 248645.1 | 468470.5 |
| 513.4136 | 30.30625 | 30.2745  | 30.338   | 6  | 3 | 3 | 197721   | 225814.3 | 222736.6 |
| 364.83   | 10.68877 | 10.63755 | 10.77118 | 8  | 4 | 4 | 190077.1 | 726287.5 | 863172.3 |
| 432.2808 | 8.879017 | 8.677417 | 8.9437   | 6  | 3 | 3 | 819533.1 | 2331992  | 2965490  |
| 374.3634 | 35.49167 | 35.4655  | 35.5595  | 5  | 3 | 2 | 240313.3 | 677019.3 | 1185124  |
| 882.5701 | 8.903733 | 8.7127   | 8.919083 | 5  | 3 | 2 | 928017.8 | 2072245  | 3135530  |
| 340.156  | 12.46995 | 12.32698 | 12.72132 | 5  | 0 | 3 | 327135.4 | 107551.9 | 64274.45 |
| 922.5907 | 43.578   | 43.55983 | 43.65967 | 7  | 2 | 5 | 92076.02 | 231417   | 301687.5 |
| 1767.252 | 9.504742 | 9.460417 | 9.537367 | 4  | 1 | 3 | 13326297 | 3221019  | 6831087  |
| 358.0904 | 9.490225 | 9.460417 | 9.537367 | 4  | 1 | 3 | 5072353  | 3992789  | 8230398  |
| 318.1497 | 18.11192 | 18.05717 | 18.1585  | 4  | 3 | 1 | 1254357  | 2286571  | 4591643  |
| 324.5882 | 27.463   | 27.44267 | 27.53083 | 7  | 2 | 5 | 548844.8 | 1800469  | 2503189  |
| 393.322  | 31.75125 | 31.7105  | 31.80183 | 10 | 5 | 5 | 403895.7 | 851088.8 | 1045175  |
| 258.2795 | 28.08783 | 28.07333 | 28.15283 | 7  | 4 | 3 | 203144.9 | 107423   | 31562.86 |
| 753.1886 | 29.228   | 29.18433 | 29.26133 | 6  | 4 | 2 | 102473.2 | 373692.8 | 363768.7 |
| 1087.943 | 9.460417 | 9.43065  | 9.64025  | 5  | 1 | 3 | 8858634  | 2347699  | 5067212  |
| 457.7873 | 9.463983 | 9.416233 | 9.537367 | 3  | 0 | 3 | 3073789  | 963306.5 | 1963892  |
| 633.0351 | 10.86477 | 10.78832 | 10.93685 | 7  | 2 | 5 | 213110.8 | 299198.9 | 438580.6 |
| 679.5128 | 16.95067 | 16.68417 | 17.1305  | 5  | 1 | 3 | 4613109  | 31040236 | 37022940 |
| 265.8862 | 8.969375 | 8.78305  | 9.0047   | 4  | 3 | 1 | 226265.4 | 322187.7 | 328130.3 |
| 690.5278 | 34.29483 | 34.24417 | 34.31533 | 10 | 5 | 5 | 1436534  | 2011376  | 2252289  |
| 229.3316 | 9.525933 | 9.460417 | 9.537367 | 4  | 1 | 3 | 9265071  | 3110790  | 6486975  |
| 641.4499 | 11.60209 | 11.56378 | 11.61237 | 4  | 1 | 3 | 40379.47 | 58353.98 | 69017.32 |
| 1736.392 | 9.483058 | 9.460417 | 9.537367 | 4  | 1 | 3 | 5595497  | 3760204  | 7984418  |
| 339.6979 | 9.503675 | 9.43065  | 9.537367 | 4  | 1 | 3 | 2693825  | 2207612  | 2075967  |
| 1005.929 | 9.460417 | 9.43065  | 9.64025  | 5  | 1 | 3 | 8295465  | 2379797  | 5202686  |
| 387.6818 | 9.552117 | 9.43065  | 9.65795  | 4  | 1 | 3 | 18613256 | 6115970  | 6403639  |
| 499.1948 | 10.40111 | 10.34782 | 10.44835 | 6  | 2 | 4 | 1931722  | 2245653  | 3257814  |
| 368.0176 | 9.515    | 9.460417 | 9.545617 | 5  | 2 | 3 | 28970814 | 7776086  | 15427556 |

|          |          |          |          |    |   |   |          |          |          |
|----------|----------|----------|----------|----|---|---|----------|----------|----------|
| 380.1979 | 10.33698 | 10.27485 | 10.366   | 3  | 0 | 3 | 13759126 | 96881.96 | 52059.23 |
| 675.8091 | 9.4622   | 9.444983 | 9.537367 | 4  | 1 | 3 | 20400728 | 9104004  | 19015527 |
| 340.4069 | 9.526183 | 9.463983 | 9.584433 | 6  | 3 | 3 | 30606504 | 15431064 | 17421558 |
| 729.7277 | 9.4622   | 9.43065  | 9.537367 | 4  | 1 | 3 | 10479551 | 4293239  | 9132016  |
| 502.3083 | 21.45883 | 21.42667 | 21.49317 | 3  | 0 | 3 | 152484.5 | 108129.5 | 22435.26 |
| 378.5679 | 9.507758 | 9.43065  | 9.6125   | 4  | 1 | 3 | 5670584  | 1857555  | 3428903  |
| 780.9289 | 20.66967 | 20.61367 | 20.89033 | 5  | 2 | 3 | 66208.41 | 104905   | 182257.4 |
| 1860.83  | 9.527133 | 9.506667 | 9.626317 | 4  | 1 | 3 | 3291570  | 1826932  | 3860263  |
| 533.3884 | 29.97558 | 29.951   | 29.9975  | 10 | 5 | 5 | 467543.1 | 4799775  | 1002013  |
| 450.123  | 37.88    | 37.87833 | 37.96417 | 3  | 0 | 3 | 436607.8 | 2551.498 | 2367.624 |
| 716.5533 | 39.80525 | 39.77517 | 39.87733 | 10 | 5 | 5 | 4495489  | 5070646  | 3849615  |
| 482.3999 | 31.04    | 30.96583 | 31.1715  | 8  | 3 | 5 | 1904726  | 2592926  | 3147071  |
| 315.1509 | 30.442   | 30.33317 | 30.48    | 9  | 4 | 5 | 169112.9 | 476616.4 | 323879.8 |
| 413.7985 | 9.845483 | 9.7252   | 9.918383 | 11 | 5 | 4 | 1783049  | 1200179  | 1759994  |
| 178.9463 | 16.36023 | 16.14432 | 16.45722 | 3  | 0 | 3 | 2747539  | 9250356  | 12420461 |
| 652.7322 | 9.455275 | 9.43065  | 9.537367 | 4  | 1 | 3 | 10519308 | 1338312  | 2857983  |
| 453.3986 | 40.66217 | 40.63783 | 40.73733 | 7  | 2 | 5 | 81347.89 | 189463.5 | 145419.3 |
| 350.241  | 32.51183 | 32.4595  | 32.571   | 3  | 0 | 3 | 217319   | 1067208  | 391055.7 |
| 381.922  | 18.68742 | 18.65283 | 18.7195  | 6  | 1 | 5 | 118271.3 | 202362.8 | 320782.9 |
| 801.4094 | 20.08067 | 20.07783 | 20.28383 | 5  | 3 | 2 | 974573.5 | 3507789  | 6183160  |
| 519.3916 | 10.9813  | 10.9416  | 11.1144  | 9  | 4 | 5 | 601328.6 | 1267821  | 1433644  |
| 615.4178 | 9.537367 | 9.5169   | 9.549217 | 3  | 0 | 3 | 1583323  | 831778.6 | 1736891  |
| 253.1074 | 27.68242 | 27.55883 | 27.731   | 4  | 3 | 1 | 44134.3  | 218324   | 140728.8 |
| 216.3023 | 9.527133 | 9.506667 | 9.571    | 4  | 1 | 3 | 8113924  | 3483255  | 6837898  |
| 761.5831 | 39.65433 | 39.63817 | 39.75833 | 10 | 5 | 5 | 1335830  | 1481202  | 1214859  |
| 357.0351 | 9.531333 | 9.2572   | 9.7252   | 5  | 1 | 3 | 16661766 | 4115558  | 8587119  |
| 597.044  | 22.12717 | 22.08617 | 22.15067 | 5  | 3 | 2 | 115642.4 | 474068.2 | 591751.1 |
| 245.1515 | 25.14183 | 25.14167 | 25.18283 | 3  | 0 | 3 | 85575.23 | 70812.21 | 73931.47 |
| 764.5382 | 34.2315  | 34.2275  | 34.25717 | 4  | 1 | 3 | 165890.9 | 84200.97 | 110238.6 |
| 1106.784 | 28.0385  | 27.91133 | 28.07333 | 3  | 3 | 0 | 37113.68 | 71025.97 | 33151.52 |
| 612.134  | 9.52075  | 9.5169   | 9.537367 | 3  | 0 | 3 | 9245518  | 4791613  | 9958966  |
| 1041.917 | 9.493558 | 9.446567 | 9.545617 | 4  | 1 | 3 | 9187547  | 757975.3 | 1694884  |
| 585.4019 | 10.11463 | 10.04548 | 10.15697 | 4  | 3 | 1 | 186563.4 | 116056   | 131099.7 |
| 347.2223 | 13.00733 | 12.97645 | 13.06513 | 8  | 5 | 3 | 377735.9 | 1543772  | 1427544  |
| 600.2755 | 30.8785  | 30.81667 | 31.1685  | 9  | 3 | 5 | 954114.3 | 2776244  | 3827849  |
| 303.8837 | 2.101633 | 2.062117 | 2.1455   | 6  | 5 | 1 | 247870.6 | 1517916  | 436590.6 |
| 357.4168 | 9.527133 | 9.47815  | 9.598583 | 4  | 1 | 3 | 14184905 | 2938044  | 6172888  |
| 660.4642 | 9.463983 | 9.444983 | 9.537367 | 5  | 2 | 3 | 61148396 | 42009715 | 72323448 |
| 655.0135 | 9.463983 | 9.444983 | 9.537367 | 3  | 0 | 3 | 57467004 | 13836159 | 29469502 |
| 319.2459 | 31.30467 | 31.301   | 31.31433 | 3  | 0 | 3 | 14845450 | 129432.9 | 28350.38 |
| 378.9431 | 31.34883 | 31.257   | 31.3885  | 3  | 3 | 0 | 89783.14 | 258091.9 | 110794.9 |
| 263.0402 | 13.67426 | 13.43332 | 13.76545 | 8  | 1 | 5 | 907340.8 | 1931420  | 3469721  |
| 725.4295 | 10.67828 | 10.599   | 10.77118 | 9  | 5 | 4 | 1.2E+08  | 2.46E+08 | 3.2E+08  |
| 1674.055 | 9.541492 | 9.49235  | 9.626317 | 4  | 1 | 3 | 3963021  | 985189.1 | 1980703  |
| 541.4508 | 40.39875 | 40.36367 | 40.45683 | 10 | 5 | 5 | 637705.1 | 869282.4 | 559543.5 |
| 522.1314 | 22.119   | 22.05267 | 22.15067 | 6  | 3 | 3 | 282480.9 | 735781.8 | 937254.9 |
| 490.1987 | 9.455083 | 9.43065  | 9.537367 | 4  | 1 | 3 | 7263449  | 2243082  | 4479358  |

|          |          |          |          |    |   |   |          |          |          |
|----------|----------|----------|----------|----|---|---|----------|----------|----------|
| 563.3136 | 29.18475 | 29.16983 | 29.23333 | 4  | 3 | 1 | 277082.2 | 628447.9 | 883693.2 |
| 632.6608 | 9.511617 | 9.460417 | 9.537367 | 4  | 1 | 3 | 2525537  | 2266955  | 4532382  |
| 837.3454 | 10.69112 | 10.64867 | 10.75237 | 4  | 3 | 1 | 1075318  | 1191259  | 1234622  |
| 755.8211 | 9.541492 | 9.506667 | 9.626317 | 4  | 1 | 3 | 8209820  | 3287981  | 6749752  |
| 447.077  | 28.20833 | 28.20033 | 28.23483 | 5  | 1 | 4 | 66187.73 | 187661.3 | 249850.5 |
| 612.9063 | 9.541492 | 9.534967 | 9.6125   | 4  | 1 | 3 | 1571437  | 573021.4 | 1132916  |
| 229.7248 | 9.534967 | 9.43065  | 9.537367 | 3  | 0 | 3 | 4665217  | 1637440  | 3430914  |
| 419.2182 | 13.34403 | 13.25417 | 13.38155 | 9  | 5 | 4 | 1894742  | 5844674  | 10057169 |
| 613.1226 | 9.53435  | 9.49235  | 9.626317 | 4  | 1 | 3 | 3693804  | 1360549  | 2835020  |
| 400.0151 | 22.12808 | 22.06867 | 22.18633 | 10 | 5 | 5 | 6467700  | 28488754 | 44832957 |
| 752.1855 | 29.21358 | 29.19333 | 29.26133 | 8  | 5 | 3 | 230832.9 | 1350661  | 1157443  |
| 676.4146 | 9.515    | 9.463983 | 9.57815  | 7  | 4 | 3 | 3546780  | 8283568  | 10026985 |
| 677.2557 | 9.531333 | 9.52075  | 9.537367 | 3  | 0 | 3 | 3575354  | 1807728  | 3064235  |
| 758.9678 | 9.504625 | 9.460417 | 9.537367 | 4  | 1 | 3 | 8829443  | 3968056  | 7632129  |
| 218.0904 | 25.90633 | 25.86733 | 25.9325  | 6  | 2 | 4 | 58969.29 | 174794.5 | 166557.1 |
| 233.0263 | 28.15483 | 28.05933 | 28.162   | 5  | 1 | 4 | 41051.67 | 52151.56 | 65337.16 |
| 324.5881 | 27.81208 | 27.765   | 27.85217 | 4  | 1 | 3 | 313586   | 990947.5 | 1413580  |
| 684.2018 | 9.4622   | 9.416233 | 9.537367 | 4  | 1 | 3 | 5008101  | 2799327  | 5686269  |
| 377.9557 | 9.537367 | 9.47815  | 9.545617 | 3  | 0 | 3 | 5865251  | 1120095  | 2266216  |
| 1961.282 | 9.496575 | 9.473767 | 9.537367 | 4  | 1 | 3 | 9614491  | 6023423  | 6916539  |
| 726.433  | 10.66922 | 10.599   | 10.77118 | 9  | 5 | 4 | 53536892 | 1.13E+08 | 1.46E+08 |
| 644.4953 | 34.38867 | 34.33583 | 34.401   | 10 | 5 | 5 | 20143634 | 32230874 | 34905630 |
| 281.2389 | 9.4622   | 9.416233 | 9.537367 | 4  | 1 | 3 | 7234955  | 1477292  | 2317405  |
| 525.3999 | 31.704   | 31.69833 | 31.722   | 5  | 2 | 3 | 134658.9 | 71763.35 | 81856.47 |
| 378.3714 | 9.455275 | 9.43065  | 9.537367 | 4  | 1 | 3 | 7021023  | 1586213  | 3219179  |
| 598.3189 | 30.26683 | 30.24533 | 30.33317 | 5  | 2 | 3 | 64412.1  | 206207.8 | 121266.8 |
| 1106.675 | 10.67191 | 10.66397 | 10.70088 | 6  | 3 | 3 | 2158395  | 1280359  | 1624318  |
| 1741.552 | 9.490225 | 9.460417 | 9.537367 | 4  | 1 | 3 | 12452665 | 10060938 | 21241758 |
| 363.9264 | 13.3176  | 13.25127 | 13.34403 | 3  | 0 | 3 | 183093.4 | 426933   | 821893.2 |
| 391.0574 | 17.60433 | 17.5895  | 17.60533 | 7  | 4 | 3 | 107154.5 | 472577.5 | 474821.9 |
| 612.2652 | 9.536167 | 9.5169   | 9.6125   | 4  | 1 | 3 | 1574519  | 535324.9 | 1028355  |
| 331.4896 | 9.500675 | 9.444983 | 9.6125   | 4  | 1 | 3 | 6444467  | 2235967  | 4558025  |
| 1663.377 | 9.5169   | 9.47815  | 9.537367 | 3  | 0 | 3 | 18435374 | 7338061  | 15059841 |
| 270.2123 | 28.235   | 28.21967 | 28.2495  | 5  | 3 | 2 | 109248.8 | 370925.5 | 474097.5 |
| 405.2278 | 14.3585  | 14.32238 | 14.45953 | 8  | 3 | 5 | 173853.5 | 848790.5 | 821334.3 |
| 584.4737 | 40.26883 | 40.24883 | 40.30817 | 10 | 5 | 5 | 3700244  | 5153206  | 3370479  |
| 761.3372 | 9.541492 | 9.52075  | 9.598583 | 4  | 1 | 3 | 2778504  | 1617191  | 2898180  |
| 341.9401 | 9.469283 | 9.43065  | 9.537367 | 4  | 1 | 3 | 4073082  | 2851415  | 6135965  |
| 672.5267 | 39.95192 | 39.92767 | 40.02617 | 10 | 5 | 5 | 5387120  | 5929581  | 4105267  |
| 242.1755 | 10.42108 | 10.36523 | 10.45412 | 10 | 5 | 5 | 26777338 | 75901193 | 1.02E+08 |
| 350.0591 | 9.463983 | 9.444983 | 9.537367 | 3  | 0 | 3 | 5653222  | 2165538  | 4360896  |
| 395.5852 | 17.59992 | 17.5895  | 17.60533 | 8  | 4 | 4 | 114177.9 | 461093.8 | 468716.6 |
| 717.5566 | 39.81758 | 39.77517 | 39.87733 | 10 | 5 | 5 | 1804084  | 1835557  | 1355610  |
| 251.0252 | 11.0511  | 10.9623  | 11.11307 | 6  | 2 | 4 | 307566.6 | 399989.2 | 659578.3 |
| 443.1496 | 33.17183 | 33.15433 | 33.1875  | 4  | 0 | 4 | 189423.2 | 272686.6 | 180869.7 |
| 613.8507 | 9.515    | 9.460417 | 9.545617 | 5  | 2 | 3 | 17382820 | 5903235  | 12141186 |
| 483.3624 | 44.32183 | 44.30133 | 44.3745  | 10 | 5 | 5 | 192896.2 | 2232444  | 583792.2 |

|          |          |          |          |    |   |   |          |          |          |
|----------|----------|----------|----------|----|---|---|----------|----------|----------|
| 490.1767 | 26.4435  | 26.41383 | 26.474   | 5  | 2 | 3 | 206070   | 320715   | 427969.7 |
| 459.1803 | 10.41848 | 10.34782 | 10.46817 | 5  | 2 | 3 | 636332.4 | 1039313  | 1628836  |
| 587.9266 | 38.56117 | 38.47583 | 38.64733 | 7  | 3 | 4 | 53560.75 | 156843.2 | 144950.4 |
| 287.9883 | 8.690483 | 8.56485  | 8.79455  | 5  | 2 | 3 | 243707.1 | 313958.6 | 248865.9 |
| 217.0162 | 21.69767 | 21.57183 | 21.7275  | 10 | 5 | 5 | 739081.8 | 2108197  | 2146586  |
| 326.596  | 30.99383 | 30.979   | 31.07383 | 6  | 1 | 5 | 143211.2 | 313262   | 670646   |
| 370.2594 | 12.34048 | 12.25188 | 12.46995 | 6  | 3 | 3 | 149009.4 | 557345.8 | 521988.9 |
| 349.7324 | 9.500675 | 9.460417 | 9.545617 | 4  | 1 | 3 | 16890804 | 4184964  | 8073444  |
| 609.106  | 20.65483 | 20.55917 | 20.68567 | 5  | 2 | 3 | 106770.4 | 584203.2 | 709995.4 |
| 454.8297 | 33.88617 | 33.86017 | 33.924   | 8  | 3 | 5 | 505436.2 | 1505070  | 1659505  |
| 272.2952 | 27.15375 | 27.149   | 27.1935  | 6  | 3 | 3 | 528435.2 | 694864.2 | 619502.3 |
| 318.3011 | 26.23883 | 26.14367 | 26.28967 | 5  | 1 | 4 | 38543.34 | 103281.1 | 85120.74 |
| 673.8834 | 9.463983 | 9.444983 | 9.64025  | 5  | 1 | 3 | 11587702 | 5227508  | 10907498 |
| 598.26   | 29.21425 | 29.19333 | 29.31467 | 10 | 5 | 5 | 5734784  | 19198509 | 25588201 |
| 439.1345 | 29.56833 | 29.5495  | 29.62233 | 3  | 0 | 3 | 203567.3 | 9734.861 | 5979.346 |
| 1745.479 | 9.504625 | 9.460417 | 9.537367 | 4  | 1 | 3 | 5053205  | 3968995  | 8383066  |
| 408.1473 | 23.83067 | 23.73983 | 23.85583 | 9  | 4 | 5 | 643370.2 | 1593854  | 2607740  |
| 454.0252 | 19.56592 | 19.50067 | 19.79067 | 6  | 2 | 3 | 204387.9 | 473570.9 | 853485.4 |
| 410.3384 | 9.970325 | 9.93755  | 10.0025  | 8  | 4 | 4 | 3581594  | 4980213  | 6204607  |
| 373.7717 | 21.47325 | 21.35633 | 21.5575  | 6  | 3 | 3 | 123848.5 | 253285.3 | 309467.4 |
| 366.8231 | 9.4881   | 9.460417 | 9.537367 | 5  | 2 | 3 | 71056640 | 22198060 | 44110950 |
| 442.0451 | 22.1215  | 22.05267 | 22.18633 | 7  | 2 | 5 | 301391.8 | 1130016  | 1840175  |
| 235.1696 | 27.269   | 27.186   | 27.28717 | 7  | 2 | 5 | 208588.3 | 874170.6 | 715841.3 |
| 555.2921 | 30.37158 | 30.35267 | 30.476   | 6  | 3 | 3 | 86402.36 | 314167.5 | 319699.2 |
| 680.9354 | 9.532583 | 9.49235  | 9.618033 | 5  | 3 | 2 | 11158957 | 10026333 | 10461574 |
| 724.4528 | 9.94255  | 9.930567 | 9.988417 | 5  | 2 | 3 | 910282.9 | 388385   | 634578   |
| 341.3246 | 35.16167 | 35.13233 | 35.20567 | 9  | 5 | 4 | 117350   | 380645.2 | 307283.3 |
| 260.2053 | 10.42096 | 10.34782 | 10.45412 | 8  | 4 | 4 | 3722170  | 10445615 | 12073984 |
| 336.3112 | 28.43575 | 28.41667 | 28.45367 | 6  | 3 | 3 | 185185.8 | 252459.6 | 161051.8 |
| 686.2303 | 9.4622   | 9.444983 | 9.537367 | 4  | 1 | 3 | 9805482  | 4753290  | 9893992  |
| 488.8136 | 9.4622   | 9.416233 | 9.537367 | 4  | 1 | 3 | 4648382  | 1671918  | 3477573  |
| 338.5943 | 9.504742 | 9.460417 | 9.537367 | 4  | 1 | 3 | 4136066  | 3118991  | 6604787  |
| 254.2483 | 17.91433 | 17.88083 | 17.9575  | 7  | 3 | 4 | 136018.1 | 163964.1 | 187097.2 |
| 484.339  | 9.972942 | 9.90985  | 10.00977 | 8  | 4 | 4 | 1652692  | 2029935  | 2341196  |
| 486.2038 | 9.463983 | 9.416233 | 9.537367 | 3  | 0 | 3 | 1601465  | 723973.8 | 1104414  |
| 1568.361 | 9.537367 | 9.47815  | 9.545617 | 3  | 0 | 3 | 5828682  | 2043698  | 4481113  |
| 348.5882 | 26.869   | 26.79817 | 26.919   | 7  | 2 | 5 | 196190.8 | 426322.4 | 607007.6 |
| 425.1541 | 38.8755  | 38.86817 | 38.88733 | 4  | 0 | 4 | 160412.1 | 245492.3 | 121481.7 |
| 623.4534 | 43.45542 | 43.44017 | 43.48533 | 10 | 5 | 5 | 3145184  | 41741954 | 11463186 |
| 312.1811 | 11.91315 | 11.89148 | 12.0772  | 8  | 3 | 5 | 208564   | 590469.6 | 806624.4 |
| 669.3512 | 41.20783 | 41.17833 | 41.23733 | 3  | 3 | 0 | 50012.48 | 239866.5 | 206789.8 |
| 691.5304 | 34.30942 | 34.27767 | 34.31533 | 6  | 2 | 4 | 199040.3 | 285083   | 252249.3 |
| 342.2758 | 10.1429  | 10.0411  | 10.17218 | 7  | 4 | 3 | 246741.6 | 382370.6 | 411687.3 |
| 257.0883 | 22.11458 | 22.0845  | 22.142   | 6  | 2 | 4 | 80606.1  | 344904.8 | 330511.4 |
| 645.4988 | 34.39317 | 34.33583 | 34.401   | 10 | 5 | 5 | 7536764  | 10724277 | 11759187 |
| 349.363  | 9.497658 | 9.460417 | 9.537367 | 4  | 1 | 3 | 14868867 | 3427927  | 6455440  |
| 728.6759 | 9.4622   | 9.444983 | 9.537367 | 4  | 1 | 3 | 20163410 | 9334083  | 19513682 |

|          |          |          |          |    |   |   |          |          |          |
|----------|----------|----------|----------|----|---|---|----------|----------|----------|
| 1764.188 | 9.527133 | 9.47815  | 9.6125   | 4  | 1 | 3 | 5982793  | 1350735  | 2935787  |
| 464.7711 | 9.455083 | 9.416233 | 9.537367 | 4  | 1 | 3 | 3584767  | 1230040  | 2568828  |
| 696.4396 | 9.321717 | 9.2866   | 9.349817 | 5  | 2 | 3 | 3816763  | 2684669  | 3510191  |
| 269.2091 | 28.21783 | 28.1925  | 28.24967 | 10 | 5 | 5 | 945383   | 4025986  | 4986228  |
| 512.2697 | 44.85983 | 44.83033 | 44.96    | 3  | 3 | 0 | 52136.89 | 466359.6 | 206694.8 |
| 574.3383 | 30.8485  | 30.74683 | 30.90333 | 8  | 4 | 4 | 909626   | 3124431  | 3224502  |
| 688.9754 | 22.1215  | 22.03667 | 22.18633 | 7  | 2 | 5 | 280875.7 | 684978.4 | 1237795  |
| 613.9814 | 9.531333 | 9.506667 | 9.537367 | 3  | 0 | 3 | 3220761  | 768245.5 | 1538786  |
| 198.1855 | 21.66425 | 21.557   | 21.6935  | 10 | 5 | 5 | 1162018  | 4766225  | 5859050  |
| 268.1    | 25.68575 | 25.63817 | 25.705   | 10 | 5 | 5 | 4794315  | 12398702 | 22985079 |
| 203.3944 | 9.515    | 9.460417 | 9.537367 | 5  | 2 | 3 | 3484497  | 3020369  | 2849748  |
| 674.817  | 9.4622   | 9.444983 | 9.537367 | 4  | 1 | 3 | 23524802 | 10792599 | 22170084 |
| 680.1384 | 28.3815  | 28.353   | 28.45267 | 5  | 2 | 3 | 83449.13 | 107588.7 | 148059.2 |
| 506.3964 | 15.5315  | 15.4711  | 15.60238 | 10 | 5 | 5 | 116712.2 | 450487.5 | 480007.5 |
| 535.0593 | 28.62875 | 28.613   | 28.6385  | 4  | 1 | 3 | 47319.51 | 47169.17 | 80087.38 |
| 671.4951 | 34.3045  | 34.24417 | 34.31533 | 9  | 5 | 4 | 424407.4 | 854326.3 | 959343.7 |
| 229.1417 | 9.515567 | 9.415217 | 9.537367 | 5  | 1 | 3 | 3603338  | 3010131  | 5825329  |
| 428.0459 | 28.96717 | 28.95033 | 28.97417 | 6  | 1 | 5 | 420594.8 | 641798.1 | 1327078  |
| 338.1613 | 32.13775 | 32.0875  | 32.20367 | 8  | 3 | 5 | 391834.1 | 1209714  | 1968432  |
| 1650.974 | 9.541492 | 9.47815  | 9.626317 | 4  | 1 | 3 | 13328043 | 4212807  | 8228885  |
| 470.2805 | 23.0275  | 23.01433 | 23.0335  | 3  | 0 | 3 | 640455.9 | 353418.9 | 201493.5 |
| 203.1279 | 12.0813  | 11.91327 | 12.26893 | 6  | 1 | 4 | 69702.81 | 193773   | 108273.9 |
| 356.244  | 24.32058 | 24.31317 | 24.34483 | 4  | 0 | 4 | 131258.5 | 256183.1 | 295411.6 |
| 454.8519 | 13.3597  | 13.28902 | 13.43433 | 4  | 1 | 3 | 103225.7 | 148097.1 | 217825.4 |
| 730.3151 | 9.4622   | 9.444983 | 9.537367 | 4  | 1 | 3 | 18773222 | 8807881  | 18380360 |
| 451.1604 | 9.67135  | 9.61695  | 9.7788   | 7  | 3 | 4 | 1191511  | 1544794  | 1328679  |
| 453.1081 | 9.227467 | 9.132617 | 9.290367 | 6  | 4 | 2 | 3471858  | 1817610  | 872589.4 |
| 273.1101 | 24.681   | 24.66817 | 24.75017 | 7  | 4 | 3 | 310764.4 | 921679.4 | 1447939  |
| 197.1537 | 24.03283 | 24.0235  | 24.07917 | 5  | 3 | 2 | 264286.3 | 1523445  | 1309019  |
| 1647.187 | 9.53435  | 9.506667 | 9.6125   | 4  | 1 | 3 | 5466832  | 2261950  | 4781760  |
| 757.7865 | 9.527133 | 9.506667 | 9.6125   | 4  | 1 | 3 | 4549180  | 2225522  | 4033192  |
| 574.26   | 29.12592 | 29.08283 | 29.24117 | 10 | 5 | 5 | 1408811  | 5448025  | 6964732  |
| 256.5826 | 23.17983 | 23.17283 | 23.17983 | 3  | 0 | 3 | 45477.09 | 64374.69 | 88341.08 |
| 585.4771 | 40.26775 | 40.23333 | 40.3155  | 10 | 5 | 5 | 1253182  | 1437896  | 872817.2 |
| 628.5002 | 40.11417 | 40.08033 | 40.17467 | 10 | 5 | 5 | 5156001  | 6210874  | 4464025  |
| 783.4797 | 9.8483   | 9.837283 | 9.869583 | 3  | 0 | 3 | 246074.3 | 161061.1 | 230925.6 |
| 438.8344 | 44.61833 | 44.58867 | 44.71883 | 10 | 5 | 5 | 126700   | 1589685  | 192615   |
| 312.6337 | 29.13333 | 29.09583 | 29.2115  | 8  | 3 | 5 | 374330.1 | 958343.6 | 1446991  |
| 179.1069 | 17.64808 | 17.5895  | 17.71217 | 6  | 2 | 4 | 129792.7 | 1007525  | 610498.9 |
| 673.5301 | 39.94992 | 39.93783 | 40.02617 | 10 | 5 | 5 | 2087888  | 1962613  | 1398444  |
| 514.3904 | 44.16633 | 44.15133 | 44.22817 | 10 | 5 | 5 | 258751.5 | 3151517  | 800558.3 |
| 272.1859 | 8.851508 | 8.641617 | 8.96155  | 6  | 3 | 3 | 977535.9 | 5560688  | 5257693  |
| 562.3568 | 10.10057 | 10.07575 | 10.19303 | 5  | 3 | 2 | 227931.5 | 84722.03 | 73429.51 |
| 357.2368 | 9.507758 | 9.446567 | 9.545617 | 4  | 1 | 3 | 11179987 | 3548363  | 5050161  |
| 735.0238 | 42.84458 | 42.81633 | 42.87517 | 10 | 5 | 5 | 100968.9 | 745670.3 | 266385.1 |
| 560.3135 | 32.11667 | 32.087   | 32.19133 | 5  | 4 | 1 | 164305.1 | 537093.6 | 760752.3 |
| 729.789  | 9.4622   | 9.444983 | 9.537367 | 4  | 1 | 3 | 23033556 | 10685694 | 22522325 |



|          |          |          |          |    |   |   |          |          |          |
|----------|----------|----------|----------|----|---|---|----------|----------|----------|
| 646.5017 | 34.38275 | 34.33583 | 34.408   | 10 | 5 | 5 | 1646626  | 1715150  | 1900401  |
| 380.133  | 11.8809  | 11.83687 | 11.89957 | 4  | 1 | 3 | 41355.14 | 55966.4  | 66282.95 |
| 521.8869 | 38.934   | 38.85367 | 38.98633 | 5  | 2 | 3 | 81856.48 | 204710.3 | 210312.5 |
| 483.4031 | 31.03683 | 30.9515  | 31.12467 | 7  | 3 | 4 | 675662.6 | 752764.6 | 968355.2 |
| 554.4422 | 38.66333 | 38.6465  | 38.83867 | 10 | 5 | 5 | 1379550  | 7238626  | 4404788  |
| 516.3079 | 27.50175 | 27.425   | 27.9555  | 14 | 5 | 4 | 352087   | 1715928  | 1226495  |
| 505.1861 | 10.40169 | 10.36523 | 10.51155 | 6  | 1 | 4 | 731809.6 | 940663.9 | 1227011  |
| 242.2482 | 18.41408 | 18.402   | 18.47583 | 4  | 1 | 3 | 69992.53 | 83617.43 | 54369.16 |
| 376.3106 | 9.483058 | 9.460417 | 9.537367 | 4  | 1 | 3 | 12344853 | 10451631 | 20850059 |
| 412.3789 | 30.54317 | 30.52833 | 30.58883 | 10 | 5 | 5 | 1733094  | 3528101  | 3106533  |
| 369.1729 | 29.68667 | 29.593   | 29.71    | 7  | 2 | 5 | 176843.2 | 793923.9 | 1036311  |
| 480.041  | 25.75858 | 25.71517 | 25.83683 | 4  | 1 | 3 | 67243.68 | 60564.55 | 118910.4 |
| 599.2633 | 29.21342 | 29.19917 | 29.31467 | 10 | 5 | 5 | 1716716  | 5441141  | 7594147  |
| 340.9718 | 9.496575 | 9.473767 | 9.537367 | 4  | 1 | 3 | 30295320 | 18727597 | 21892226 |
| 496.4302 | 30.99233 | 30.84933 | 31.07383 | 4  | 3 | 1 | 645164.6 | 643006.4 | 687646.7 |
| 685.2727 | 9.4622   | 9.43065  | 9.537367 | 4  | 1 | 3 | 20277038 | 9091641  | 19176652 |
| 662.3881 | 9.469283 | 9.3968   | 9.537367 | 6  | 2 | 4 | 6717332  | 7237916  | 11984672 |
| 226.0687 | 23.24017 | 23.2015  | 23.24467 | 3  | 0 | 3 | 27578.37 | 50563.62 | 60964.82 |
| 1045.32  | 9.455083 | 9.416233 | 9.537367 | 4  | 1 | 3 | 10232122 | 1131182  | 2317649  |
| 298.6259 | 26.87017 | 26.81367 | 26.919   | 7  | 2 | 5 | 579556.7 | 1674478  | 2300587  |
| 888.1424 | 30.27992 | 30.251   | 30.36167 | 6  | 1 | 5 | 107010   | 184986.1 | 407843.1 |
| 216.5288 | 9.536167 | 9.5169   | 9.626317 | 4  | 1 | 3 | 3472939  | 1491887  | 2888979  |
| 311.6439 | 30.293   | 30.2375  | 30.36167 | 5  | 1 | 4 | 124675.6 | 223165.4 | 429678.9 |
| 367.6276 | 9.494192 | 9.47815  | 9.537367 | 4  | 1 | 3 | 71611016 | 24286160 | 48558074 |
| 741.3564 | 43.59883 | 43.58783 | 43.63067 | 4  | 1 | 3 | 49554.16 | 174237.9 | 162461.2 |
| 606.096  | 10.74336 | 10.6177  | 10.75237 | 4  | 1 | 3 | 544774.2 | 742853.4 | 1377836  |
| 757.3026 | 9.527133 | 9.506667 | 9.626317 | 4  | 1 | 3 | 3564350  | 1576895  | 3122987  |
| 736.1358 | 9.4622   | 9.416233 | 9.537367 | 4  | 1 | 3 | 11327567 | 2409050  | 5063758  |
| 632.4762 | 12.23346 | 12.1935  | 12.2605  | 4  | 1 | 3 | 30396.17 | 38461.89 | 37978.55 |
| 358.4562 | 9.483058 | 9.460417 | 9.537367 | 4  | 1 | 3 | 12621834 | 10664166 | 20756065 |
| 842.1224 | 30.03717 | 30.00717 | 30.1315  | 6  | 1 | 5 | 76943.64 | 125125.7 | 271527.6 |
| 615.4255 | 10.00425 | 9.805633 | 10.04445 | 9  | 4 | 5 | 7288646  | 3647956  | 4562960  |
| 346.1849 | 16.17548 | 16.12965 | 16.27868 | 5  | 2 | 3 | 34585.18 | 172898.7 | 53615.97 |
| 173.3296 | 9.455275 | 9.416233 | 9.537367 | 4  | 1 | 3 | 2362647  | 1051584  | 1014001  |
| 173.1538 | 14.47827 | 14.41085 | 14.5962  | 6  | 3 | 3 | 47234.73 | 123787.1 | 124660.9 |
| 212.0827 | 10.4086  | 10.34782 | 10.47727 | 6  | 2 | 4 | 6540952  | 1955892  | 3265912  |
| 625.4185 | 10.21408 | 10.16835 | 10.25657 | 5  | 3 | 2 | 125770.2 | 123307.8 | 145417.3 |
| 676.2879 | 9.4622   | 9.444983 | 9.537367 | 4  | 1 | 3 | 6359531  | 3253184  | 6949846  |
| 476.8437 | 33.78817 | 33.70233 | 33.8535  | 9  | 4 | 5 | 409611.5 | 1176136  | 1297328  |
| 612.9912 | 9.506667 | 9.502483 | 9.537367 | 3  | 0 | 3 | 19677836 | 11621814 | 23597540 |
| 735.5389 | 9.463983 | 9.43065  | 9.537367 | 3  | 0 | 3 | 6764993  | 1803735  | 2937991  |
| 760.4637 | 9.819583 | 9.7121   | 9.848417 | 5  | 1 | 4 | 1089803  | 609757.6 | 819287.2 |
| 204.1197 | 9.5169   | 9.506667 | 9.598583 | 5  | 2 | 3 | 3731135  | 3034674  | 2699188  |
| 600.469  | 34.47067 | 34.42783 | 34.50133 | 10 | 5 | 5 | 20806182 | 30407209 | 32992031 |
| 756.9974 | 9.529058 | 9.5169   | 9.6125   | 4  | 1 | 3 | 7241562  | 4441754  | 9360291  |
| 673.3606 | 9.4622   | 9.444983 | 9.537367 | 4  | 1 | 3 | 8053823  | 5588396  | 10521316 |
| 595.8294 | 9.511617 | 9.460417 | 9.537367 | 4  | 1 | 3 | 3378733  | 3376267  | 7221239  |

|          |          |          |          |    |   |   |          |          |          |
|----------|----------|----------|----------|----|---|---|----------|----------|----------|
| 371.9832 | 13.72523 | 13.43332 | 13.76748 | 9  | 3 | 4 | 1533404  | 5646495  | 11356343 |
| 477.3587 | 39.15417 | 39.07883 | 39.223   | 8  | 3 | 5 | 197390.5 | 428236   | 432016   |
| 380.3375 | 34.79667 | 34.7655  | 34.82567 | 10 | 5 | 5 | 2441557  | 3950029  | 4241433  |
| 762.586  | 39.68267 | 39.60733 | 39.7435  | 8  | 3 | 5 | 286228.4 | 281764.9 | 272549.7 |
| 932.1837 | 41.20025 | 41.16317 | 41.23617 | 8  | 3 | 5 | 52561.19 | 89821.66 | 80854.3  |
| 306.1553 | 20.6845  | 20.67083 | 20.71717 | 3  | 0 | 3 | 532061.4 | 359920.1 | 212377.8 |
| 496.3815 | 9.792833 | 9.7758   | 9.834667 | 5  | 2 | 3 | 1301227  | 474904.1 | 736568.9 |
| 1884.919 | 9.517875 | 9.43065  | 9.537367 | 4  | 1 | 3 | 2886651  | 2670105  | 3236736  |
| 230.1907 | 11.93628 | 11.90973 | 12.10498 | 9  | 4 | 5 | 308599.9 | 863083.4 | 952331.2 |
| 658.549  | 9.463983 | 9.459367 | 9.537367 | 5  | 2 | 3 | 80144904 | 55838922 | 99537133 |
| 695.5357 | 9.79045  | 9.52075  | 9.848417 | 5  | 2 | 3 | 701164.7 | 207649.4 | 109302.9 |
| 279.6102 | 28.3815  | 28.35633 | 28.49317 | 5  | 2 | 3 | 88524.1  | 129338   | 158675.1 |
| 601.4372 | 30.39558 | 30.38133 | 30.4265  | 8  | 3 | 5 | 405831.7 | 800383.7 | 898088.4 |
| 607.1092 | 20.64267 | 20.62233 | 20.7015  | 7  | 3 | 4 | 229458   | 1147582  | 1279889  |
| 488.2698 | 41.342   | 41.31117 | 41.40883 | 3  | 3 | 0 | 39193.67 | 517878.5 | 251265.7 |
| 348.2145 | 31.32133 | 31.2855  | 31.34983 | 4  | 3 | 1 | 117678.3 | 521576.9 | 419052.4 |
| 1976.1   | 9.47815  | 9.460417 | 9.537367 | 5  | 2 | 3 | 17715382 | 11378980 | 14253341 |
| 359.3715 | 35.131   | 35.10167 | 35.19067 | 5  | 3 | 2 | 144674.8 | 395410.7 | 698446.6 |
| 372.3266 | 23.89008 | 23.83917 | 23.9305  | 6  | 2 | 4 | 167680.1 | 747544.5 | 593566.2 |
| 333.5893 | 32.12167 | 32.07333 | 32.17767 | 3  | 0 | 3 | 143037.7 | 68042.95 | 152148.7 |
| 533.321  | 25.23667 | 25.19717 | 25.2575  | 3  | 0 | 3 | 117502   | 182333.8 | 175948.2 |
| 686.7125 | 9.537367 | 9.463983 | 9.69125  | 5  | 1 | 3 | 4126443  | 3347323  | 5184357  |
| 350.2773 | 9.47815  | 9.43065  | 9.537367 | 3  | 0 | 3 | 5570098  | 2891699  | 6034029  |
| 728.2186 | 29.2135  | 29.16983 | 29.26133 | 5  | 3 | 2 | 85358.95 | 393220   | 319113.3 |
| 675.7629 | 9.4622   | 9.444983 | 9.537367 | 4  | 1 | 3 | 9839196  | 5233817  | 10391295 |
| 571.5076 | 30.35967 | 30.336   | 30.44717 | 9  | 5 | 4 | 135521.9 | 408877.9 | 334315.9 |
| 481.8056 | 9.192183 | 9.116917 | 9.2529   | 7  | 5 | 2 | 24079586 | 15290420 | 24811817 |
| 265.2166 | 26.08342 | 26.01917 | 26.13067 | 10 | 5 | 5 | 2199013  | 10430143 | 12137697 |
| 210.1574 | 22.32275 | 22.22933 | 22.33283 | 6  | 3 | 3 | 79756.78 | 301012.4 | 315491.3 |
| 702.9928 | 42.95033 | 42.928   | 42.988   | 10 | 5 | 5 | 129679.9 | 1211109  | 302247.3 |
| 718.5594 | 39.8315  | 39.7855  | 39.87733 | 7  | 2 | 5 | 370613.7 | 333173.1 | 282926.3 |
| 439.3464 | 32.32117 | 32.2815  | 32.35533 | 7  | 3 | 4 | 92030.35 | 246263.3 | 260350.6 |
| 420.2215 | 13.30844 | 13.25417 | 13.34655 | 4  | 3 | 1 | 398057.2 | 1221405  | 2226569  |
| 634.1989 | 20.397   | 20.3965  | 20.42283 | 3  | 3 | 0 | 27264.72 | 40358.33 | 39208.89 |
| 420.3474 | 37.00675 | 37.00533 | 37.0215  | 4  | 0 | 4 | 110206.3 | 1045368  | 261918.9 |
| 489.3476 | 42.84217 | 42.78533 | 42.8965  | 6  | 3 | 3 | 72527.19 | 575930.6 | 92149.94 |
| 637.9563 | 43.307   | 43.29233 | 43.3525  | 9  | 4 | 5 | 98903.17 | 903580.2 | 209683.9 |
| 389.101  | 22.73983 | 22.70783 | 22.78383 | 9  | 4 | 5 | 3107405  | 6842686  | 9256580  |
| 413.3822 | 30.54533 | 30.52833 | 30.5875  | 10 | 5 | 5 | 430358.3 | 714002.4 | 636850.7 |
| 601.4725 | 34.47067 | 34.41283 | 34.49417 | 10 | 5 | 5 | 7160821  | 9330215  | 10222795 |
| 443.0791 | 28.78033 | 28.67283 | 28.931   | 5  | 1 | 4 | 528437.7 | 1768947  | 3019085  |
| 738.2018 | 32.07292 | 32.05683 | 32.20817 | 6  | 4 | 2 | 90261.68 | 714336   | 438244.8 |
| 675.2948 | 9.4622   | 9.444983 | 9.537367 | 4  | 1 | 3 | 7813594  | 4480694  | 9183956  |
| 677.5152 | 9.518825 | 9.444983 | 9.626317 | 6  | 2 | 4 | 75162128 | 34458993 | 27581628 |
| 1664.371 | 9.531333 | 9.47815  | 9.537367 | 3  | 0 | 3 | 66039820 | 28183519 | 57073859 |
| 545.3417 | 32.1315  | 32.05883 | 32.19283 | 9  | 5 | 4 | 1006492  | 3778166  | 5771735  |
| 382.7884 | 12.68813 | 12.64055 | 12.71523 | 4  | 1 | 3 | 67327.48 | 130690.8 | 105420.2 |

|          |          |          |          |    |   |   |          |          |          |
|----------|----------|----------|----------|----|---|---|----------|----------|----------|
| 303.6476 | 29.12492 | 29.09583 | 29.2115  | 8  | 4 | 4 | 92115.51 | 450900.8 | 348463.2 |
| 455.3354 | 20.44375 | 20.411   | 20.57583 | 6  | 3 | 3 | 69638.66 | 233963.3 | 199502   |
| 676.2657 | 41.22267 | 41.19317 | 41.23733 | 5  | 4 | 1 | 48543.05 | 211889.7 | 209568.6 |
| 320.2304 | 23.61883 | 23.6005  | 23.633   | 3  | 0 | 3 | 1280662  | 340075.5 | 82271.51 |
| 422.1267 | 22.46783 | 22.44983 | 22.4765  | 5  | 2 | 3 | 699208.9 | 1950967  | 3119225  |
| 514.8616 | 16.7075  | 16.62717 | 16.91433 | 11 | 3 | 5 | 422321   | 2191704  | 2809016  |
| 443.2776 | 29.563   | 29.4915  | 29.60667 | 6  | 3 | 3 | 109293.1 | 188091.3 | 140775.8 |
| 449.1714 | 9.209233 | 9.101033 | 9.47815  | 8  | 4 | 3 | 1341585  | 3068084  | 2222025  |
| 489.1473 | 29.6275  | 29.5065  | 29.66617 | 7  | 2 | 4 | 460243.6 | 151539.6 | 237507.6 |
| 681.4421 | 21       | 20.95533 | 21.03417 | 6  | 2 | 4 | 94623.06 | 178061.7 | 298353   |
| 1973.177 | 9.51595  | 9.463983 | 9.537367 | 4  | 1 | 3 | 59649560 | 34454612 | 47158840 |
| 694.1956 | 31.00133 | 30.9645  | 31.07383 | 6  | 1 | 5 | 263503.6 | 717078.7 | 1148220  |
| 368.6214 | 9.541492 | 9.47815  | 9.626317 | 4  | 1 | 3 | 16767605 | 4880165  | 9588309  |
| 386.5685 | 30.979   | 30.8785  | 31.06583 | 5  | 1 | 4 | 60418.39 | 84255.42 | 179663.6 |
| 367.2697 | 10.52054 | 10.49603 | 10.56858 | 4  | 3 | 1 | 346633.2 | 728306.5 | 830656.9 |
| 325.1782 | 33.49667 | 33.4485  | 33.519   | 5  | 3 | 2 | 56953.74 | 202943.7 | 195237.1 |
| 383.255  | 10.4144  | 10.34782 | 10.45412 | 8  | 4 | 4 | 3040013  | 8629941  | 10376285 |
| 732.1974 | 32.087   | 31.98583 | 32.17667 | 5  | 3 | 2 | 117692   | 806089.2 | 565531.3 |
| 216.1225 | 9.531333 | 9.506667 | 9.537367 | 3  | 0 | 3 | 7055435  | 4264335  | 8470752  |
| 386.9754 | 19.40817 | 19.33867 | 19.43767 | 3  | 0 | 3 | 40521.1  | 52898.14 | 85015.11 |
| 244.0938 | 9.722833 | 9.275233 | 9.822817 | 7  | 2 | 4 | 756516.3 | 204644.2 | 219001.4 |
| 643.1123 | 29.64433 | 29.593   | 29.6515  | 4  | 1 | 3 | 53518.45 | 64825.71 | 132538.5 |
| 674.5331 | 39.97717 | 39.91717 | 40.03083 | 9  | 5 | 4 | 428636.7 | 280799   | 247102   |
| 556.4425 | 34.56683 | 34.51967 | 34.58567 | 10 | 5 | 5 | 18369768 | 25961628 | 27896644 |
| 633.1884 | 22.49367 | 22.42483 | 22.58667 | 5  | 2 | 3 | 48420.43 | 64386.81 | 78519.86 |
| 709.1056 | 9.541492 | 9.463983 | 9.5571   | 4  | 1 | 3 | 20122700 | 4680875  | 10031556 |
| 272.0948 | 19.43283 | 19.41683 | 19.45233 | 4  | 1 | 3 | 138855.5 | 194135.5 | 184815.7 |
| 646.4745 | 26.07917 | 26.02683 | 26.1195  | 3  | 0 | 3 | 404077.8 | 28515.46 | 54176.3  |
| 525.0434 | 42.58783 | 42.545   | 42.621   | 5  | 2 | 3 | 50870.35 | 367189.1 | 85495.08 |
| 1988.129 | 9.47815  | 9.473767 | 9.537367 | 5  | 2 | 3 | 16212394 | 12459172 | 15586874 |
| 277.1415 | 16.69833 | 16.66133 | 16.74017 | 9  | 5 | 4 | 511259.2 | 2135983  | 2901586  |
| 473.3418 | 9.394375 | 9.33635  | 9.432667 | 6  | 2 | 4 | 1429394  | 1297339  | 1603372  |
| 378.0442 | 9.5169   | 9.47815  | 9.537367 | 3  | 0 | 3 | 13602851 | 4752522  | 9950642  |
| 497.4874 | 37.43358 | 37.3955  | 37.6065  | 10 | 5 | 5 | 674142.2 | 4881143  | 2872485  |
| 778.4089 | 9.5571   | 9.529583 | 9.57815  | 3  | 3 | 0 | 4768429  | 3860436  | 4818155  |
| 339.5525 | 9.515    | 9.473767 | 9.6125   | 5  | 2 | 3 | 30067016 | 19757341 | 23782287 |
| 623.9797 | 17.20733 | 17.1625  | 17.25317 | 7  | 3 | 4 | 45683.73 | 138219   | 136768.5 |
| 630.675  | 9.506667 | 9.460417 | 9.626317 | 5  | 1 | 3 | 2463431  | 2559061  | 5402273  |
| 683.4751 | 33.19075 | 33.17867 | 33.2765  | 6  | 2 | 4 | 119384.9 | 307134.7 | 337233.1 |
| 211.1096 | 27.14317 | 27.08717 | 27.1935  | 9  | 4 | 5 | 460419.6 | 2088728  | 2311051  |
| 612.7694 | 9.5169   | 9.49235  | 9.537367 | 3  | 0 | 3 | 7793925  | 4190402  | 8533852  |
| 690.5013 | 26.08217 | 26.05    | 26.16233 | 4  | 1 | 3 | 300930.7 | 33746.03 | 39464.59 |
| 710.4709 | 9.537367 | 9.444983 | 9.584433 | 5  | 3 | 2 | 9817900  | 13284874 | 9820518  |
| 656.6414 | 9.4881   | 9.47815  | 9.537367 | 3  | 0 | 3 | 4650310  | 7317080  | 10673920 |
| 684.3067 | 9.4622   | 9.444983 | 9.537367 | 4  | 1 | 3 | 8081662  | 4836151  | 8626004  |
| 376.1766 | 23.776   | 23.71433 | 23.84167 | 7  | 3 | 4 | 46556.96 | 290651.9 | 159099.6 |
| 792.3994 | 10.66473 | 10.64782 | 10.72217 | 5  | 1 | 4 | 1983203  | 1942559  | 3871718  |

|          |          |          |          |    |   |   |          |          |          |
|----------|----------|----------|----------|----|---|---|----------|----------|----------|
| 332.2798 | 33.46467 | 33.40883 | 33.49667 | 5  | 2 | 3 | 164883.4 | 1535622  | 992000.4 |
| 230.2481 | 22.94567 | 22.91333 | 22.96717 | 9  | 4 | 5 | 2018052  | 343310.2 | 324495.5 |
| 421.2431 | 8.932258 | 8.730367 | 8.989483 | 4  | 3 | 1 | 365662.5 | 1067539  | 1328183  |
| 661.4249 | 9.463983 | 9.444983 | 9.537367 | 5  | 2 | 3 | 23369136 | 19901863 | 33451813 |
| 380.2801 | 18.36667 | 18.34517 | 18.40417 | 5  | 3 | 2 | 57750.61 | 134544.3 | 145007.5 |
| 369.2391 | 10.41848 | 10.34782 | 10.45412 | 9  | 5 | 4 | 75111736 | 2.48E+08 | 2.95E+08 |
| 602.4484 | 26.02    | 25.99783 | 26.06233 | 4  | 1 | 3 | 425229.1 | 56589.73 | 41222.42 |
| 378.1004 | 28.64275 | 28.59783 | 28.6585  | 6  | 2 | 4 | 103854.6 | 181770.2 | 276421.6 |
| 247.0631 | 21.69392 | 21.557   | 21.71567 | 8  | 3 | 5 | 434089.5 | 1039661  | 1316736  |
| 387.1373 | 23.13583 | 23.108   | 23.16517 | 5  | 1 | 4 | 68846.5  | 109033.7 | 123387.1 |
| 636.9815 | 39.86192 | 39.83333 | 39.89233 | 4  | 1 | 3 | 107598.3 | 833508.6 | 966148.5 |
| 611.4739 | 40.09817 | 40.08033 | 40.17467 | 6  | 2 | 4 | 260207.6 | 268984.5 | 163763.7 |
| 695.1938 | 30.99417 | 30.95017 | 31.06583 | 4  | 1 | 3 | 91067.22 | 183105.3 | 299601.8 |
| 543.8998 | 38.76    | 38.71333 | 38.83867 | 7  | 2 | 5 | 73439.32 | 189369.2 | 183269.9 |
| 365.1363 | 29.3845  | 29.28517 | 29.41067 | 6  | 4 | 2 | 1122773  | 5976931  | 5173933  |
| 922.6331 | 31.71233 | 31.70133 | 31.73933 | 5  | 2 | 3 | 47416.32 | 89806.71 | 132416.8 |
| 281.231  | 11.96602 | 11.94875 | 11.9864  | 5  | 2 | 3 | 91857.16 | 141762.4 | 95502.02 |
| 630.4163 | 43.61733 | 43.59317 | 43.65967 | 5  | 2 | 3 | 57683.75 | 193543.9 | 141535.7 |
| 412.1575 | 25.90217 | 25.838   | 25.947   | 6  | 2 | 4 | 132922.8 | 382036.7 | 545017.7 |
| 328.2876 | 9.173983 | 9.08515  | 9.239033 | 3  | 3 | 0 | 686728.3 | 1106746  | 1177913  |
| 492.3235 | 8.9587   | 8.78305  | 9.045083 | 3  | 3 | 0 | 3580335  | 13799688 | 18143216 |
| 349.8847 | 9.47815  | 9.43065  | 9.537367 | 3  | 0 | 3 | 7910464  | 3343566  | 7077270  |
| 791.4957 | 10.09471 | 10.05612 | 10.1429  | 4  | 1 | 3 | 189510.6 | 94530.03 | 155043.4 |
| 335.2438 | 24.9255  | 24.907   | 24.97667 | 5  | 2 | 3 | 361855.7 | 224688.1 | 274281.9 |
| 382.3167 | 25.60033 | 25.49183 | 25.62817 | 5  | 2 | 3 | 171200.1 | 85343.8  | 104597   |
| 1041.737 | 33.67683 | 33.62667 | 33.71167 | 6  | 2 | 4 | 172411.3 | 194674.7 | 262555.8 |
| 445.1651 | 9.7055   | 9.67135  | 9.71525  | 3  | 0 | 3 | 2766779  | 2925420  | 4171919  |
| 356.6541 | 9.47815  | 9.43065  | 9.537367 | 3  | 0 | 3 | 6994423  | 3491611  | 6052271  |
| 575.3416 | 30.86367 | 30.74683 | 30.918   | 9  | 5 | 4 | 302694.5 | 918673.4 | 913271.1 |
| 597.2689 | 30.96342 | 30.943   | 31.07383 | 10 | 5 | 5 | 1278332  | 4707384  | 6012700  |
| 156.8142 | 9.527133 | 9.47815  | 9.626317 | 4  | 1 | 3 | 4170797  | 1308902  | 2657311  |
| 629.5036 | 40.12375 | 40.09417 | 40.17467 | 10 | 5 | 5 | 1744469  | 1966047  | 1321852  |
| 276.6338 | 31.02317 | 30.96517 | 31.07383 | 5  | 0 | 5 | 109278.3 | 167915   | 296066.8 |
| 336.3112 | 34.75625 | 34.72033 | 34.77633 | 10 | 5 | 5 | 1728268  | 6023772  | 6556598  |
| 340.0521 | 9.51595  | 9.47815  | 9.537367 | 4  | 1 | 3 | 12231854 | 7785634  | 9342535  |
| 617.4679 | 19.49117 | 19.4725  | 19.58883 | 5  | 2 | 3 | 66910.77 | 476497   | 552561.2 |
| 566.4329 | 18.27833 | 18.24317 | 18.302   | 9  | 4 | 5 | 131570.9 | 396345.4 | 442986.6 |
| 452.1818 | 30.90817 | 30.90283 | 30.95083 | 3  | 0 | 3 | 76208.35 | 439954.9 | 256942.2 |
| 488.3588 | 30.00108 | 29.951   | 30.02683 | 10 | 5 | 5 | 1089573  | 11535107 | 2538802  |
| 338.2178 | 13.90905 | 13.782   | 13.99862 | 5  | 1 | 4 | 163509.1 | 417929.1 | 294367.6 |
| 584.2512 | 29.10917 | 29.0515  | 29.111   | 5  | 5 | 0 | 232993.2 | 390369.2 | 336759.8 |
| 191.1644 | 11.41238 | 11.39283 | 11.42893 | 4  | 1 | 3 | 279266.9 | 861751.3 | 1019139  |
| 484.3905 | 17.47217 | 17.429   | 17.48617 | 9  | 4 | 5 | 204719.5 | 547550.6 | 592945.8 |
| 469.8627 | 44.46975 | 44.4595  | 44.52517 | 10 | 5 | 5 | 329893.6 | 3623598  | 623975.7 |
| 348.094  | 16.929   | 16.8785  | 16.99233 | 5  | 1 | 4 | 79614.54 | 91202.91 | 154248.8 |
| 365.8273 | 9.557483 | 9.531333 | 9.626317 | 4  | 1 | 3 | 4955698  | 1307823  | 2640838  |
| 402.1918 | 13.331   | 13.25417 | 13.37348 | 5  | 2 | 3 | 1075564  | 2806525  | 5262756  |

|          |          |          |          |    |   |   |          |          |          |
|----------|----------|----------|----------|----|---|---|----------|----------|----------|
| 590.1551 | 22.1115  | 22.03667 | 22.136   | 4  | 1 | 3 | 91814.88 | 166218.9 | 226104.8 |
| 385.238  | 37.53517 | 37.51583 | 37.56533 | 4  | 0 | 4 | 135640   | 599039.7 | 308982.5 |
| 512.4161 | 34.6415  | 34.59883 | 34.66683 | 10 | 5 | 5 | 13062260 | 19536185 | 21116755 |
| 229.7758 | 9.536167 | 9.5169   | 9.626317 | 4  | 1 | 3 | 8872668  | 3851809  | 8035625  |
| 216.7546 | 9.541492 | 9.534967 | 9.598583 | 4  | 1 | 3 | 1890454  | 487668.7 | 969835.3 |
| 373.1169 | 31.34333 | 31.29983 | 31.34617 | 3  | 0 | 3 | 13358825 | 87724.42 | 171823.4 |
| 584.4456 | 34.482   | 34.4745  | 34.4965  | 7  | 3 | 4 | 383140.2 | 355511.1 | 422486.8 |
| 340.1558 | 23.58183 | 23.53    | 23.6005  | 3  | 0 | 3 | 199874.5 | 244650.9 | 134066.5 |
| 359.7644 | 9.015492 | 8.9037   | 9.114417 | 6  | 4 | 2 | 826535.8 | 1329695  | 1658827  |
| 1585.052 | 9.514858 | 9.460417 | 9.545617 | 4  | 1 | 3 | 10298957 | 8877437  | 19574703 |
| 186.5541 | 21.43108 | 21.37017 | 21.47633 | 6  | 2 | 4 | 56709.45 | 100788.7 | 132551.1 |
| 229.579  | 9.534967 | 9.502483 | 9.537367 | 3  | 0 | 3 | 7935500  | 4315074  | 9143155  |
| 357.8144 | 9.462358 | 9.416233 | 9.537367 | 4  | 1 | 3 | 3176788  | 813833.9 | 1547655  |
| 192.0079 | 2.346808 | 2.302    | 2.3724   | 4  | 3 | 1 | 164188.7 | 1559368  | 1578018  |
| 398.2903 | 27.64267 | 27.57883 | 27.65667 | 4  | 1 | 3 | 44875.26 | 105025.1 | 103622   |
| 958.4867 | 41.20025 | 41.16317 | 41.23733 | 4  | 3 | 1 | 36799.07 | 148772.7 | 158046.5 |
| 552.4017 | 15.06512 | 15.01448 | 15.15037 | 10 | 5 | 5 | 80099.21 | 332579.8 | 367858.8 |
| 544.3381 | 32.11692 | 32.05883 | 32.20817 | 10 | 5 | 5 | 3533829  | 15333898 | 22949398 |
| 484.092  | 32.11925 | 32.0875  | 32.14983 | 6  | 1 | 5 | 122862.8 | 293911   | 628180.2 |
| 468.273  | 19.89583 | 19.89117 | 20.09133 | 6  | 2 | 4 | 98054.78 | 287863   | 256508.7 |
| 273.628  | 27.472   | 27.44817 | 27.56117 | 5  | 1 | 4 | 121666.6 | 320759.4 | 439921.8 |
| 499.1642 | 23.17983 | 23.11333 | 23.22467 | 7  | 5 | 2 | 86265.13 | 246495.6 | 265799.1 |
| 325.2015 | 24.83525 | 24.631   | 24.88817 | 4  | 3 | 1 | 506048.3 | 1118862  | 2045672  |
| 517.3724 | 39.32733 | 39.31233 | 39.349   | 5  | 3 | 2 | 67243.98 | 130942.1 | 108427.7 |
| 884.3744 | 32.13042 | 32.10267 | 32.16117 | 4  | 3 | 1 | 89018.48 | 240313.9 | 340215.8 |
| 481.0461 | 21.67933 | 21.57183 | 21.75667 | 3  | 0 | 3 | 97186.98 | 64831.86 | 69665.31 |
| 156.7032 | 9.47815  | 9.43065  | 9.537367 | 3  | 0 | 3 | 2544600  | 595043.2 | 1259057  |
| 460.3088 | 33.966   | 33.91533 | 34.00917 | 7  | 3 | 4 | 52805.96 | 344963.7 | 166852.4 |
| 790.5243 | 21.05067 | 20.9775  | 21.06283 | 5  | 2 | 3 | 100927.6 | 171849.9 | 195424   |
| 557.4459 | 34.56825 | 34.51967 | 34.5815  | 10 | 5 | 5 | 5708622  | 7412773  | 8144550  |
| 1993.15  | 9.518825 | 9.515    | 9.537367 | 4  | 1 | 3 | 4968202  | 2416619  | 2708315  |
| 357.9948 | 9.47815  | 9.444983 | 9.537367 | 3  | 0 | 3 | 4091074  | 1242703  | 2666180  |
| 296.1859 | 30.80633 | 30.74683 | 30.86417 | 5  | 1 | 4 | 88559.62 | 215462.8 | 230631.6 |
| 1044.82  | 9.498892 | 9.44975  | 9.545617 | 4  | 1 | 3 | 20134140 | 2364746  | 5194392  |
| 632.4165 | 43.6045  | 43.54783 | 43.64667 | 7  | 3 | 4 | 113246.9 | 402835.4 | 416610.6 |
| 326.2335 | 14.80558 | 14.77352 | 14.92205 | 10 | 5 | 5 | 445880.4 | 2370205  | 2313703  |
| 655.5001 | 39.96733 | 39.92767 | 40.02617 | 6  | 2 | 4 | 206878.6 | 184820.6 | 104047.3 |
| 805.2189 | 41.19292 | 41.16317 | 41.25083 | 6  | 2 | 4 | 39667.83 | 97683.53 | 90702.89 |
| 429.0665 | 38.14617 | 38.093   | 38.18617 | 6  | 1 | 5 | 75434.84 | 131186.1 | 155616.8 |
| 602.4752 | 34.48225 | 34.46183 | 34.49417 | 10 | 5 | 5 | 1429844  | 1311004  | 1553428  |
| 1654.774 | 9.531333 | 9.47815  | 9.537367 | 3  | 0 | 3 | 15249836 | 6821350  | 13686626 |
| 599.3144 | 19.01383 | 19.00017 | 19.041   | 3  | 0 | 3 | 187725.4 | 214514.2 | 326852.9 |
| 390.9939 | 16.91758 | 16.9035  | 16.96167 | 6  | 2 | 4 | 2433478  | 1687663  | 3047016  |
| 705.6681 | 9.489217 | 9.444983 | 9.537367 | 4  | 1 | 3 | 3130460  | 3766188  | 5464567  |
| 375.4866 | 9.475958 | 9.460417 | 9.537367 | 4  | 1 | 3 | 23782822 | 17897004 | 36457868 |
| 374.1056 | 26.953   | 26.9415  | 26.99883 | 7  | 2 | 5 | 150854.7 | 449663.8 | 536582.8 |
| 339.1583 | 32.146   | 32.0875  | 32.19083 | 9  | 4 | 5 | 424882.1 | 1437616  | 2056767  |

|          |          |          |          |    |   |   |          |          |          |
|----------|----------|----------|----------|----|---|---|----------|----------|----------|
| 607.467  | 23.353   | 23.26583 | 23.3835  | 9  | 4 | 5 | 157888.3 | 607272   | 656357.8 |
| 578.4375 | 36.6275  | 36.57717 | 36.74517 | 6  | 2 | 4 | 135408.6 | 1337550  | 1130050  |
| 364.3142 | 34.79217 | 34.7515  | 34.82567 | 10 | 5 | 5 | 572346.8 | 983327.1 | 1114386  |
| 301.1298 | 18.06042 | 18.03083 | 18.1675  | 4  | 1 | 3 | 46861.8  | 131386.6 | 129688.1 |
| 468.3899 | 34.71467 | 34.67217 | 34.7335  | 10 | 5 | 5 | 9124292  | 12959166 | 13996949 |
| 453.2604 | 21.158   | 21.07017 | 21.17767 | 8  | 3 | 5 | 7550797  | 5128197  | 9325507  |
| 629.1346 | 29.63967 | 29.593   | 29.65167 | 6  | 2 | 4 | 79052.16 | 131580.2 | 193413.7 |
| 413.0468 | 22.13833 | 22.1365  | 22.14983 | 3  | 0 | 3 | 112016.4 | 225492.5 | 302580   |
| 277.1803 | 26.31033 | 26.23883 | 26.369   | 10 | 5 | 5 | 1375167  | 5338883  | 5476010  |
| 704.6578 | 9.489217 | 9.444983 | 9.537367 | 4  | 1 | 3 | 9076915  | 10567593 | 15965215 |
| 399.1785 | 11.28508 | 11.25705 | 11.30973 | 5  | 3 | 2 | 1645745  | 3422434  | 6489109  |
| 566.2619 | 9.173983 | 9.08515  | 9.231383 | 3  | 3 | 0 | 1276842  | 1459824  | 523158.2 |
| 216.3202 | 9.522017 | 9.474117 | 9.545617 | 4  | 1 | 3 | 4341745  | 2403531  | 4426675  |
| 335.1725 | 9.994792 | 9.93755  | 10.05848 | 6  | 2 | 4 | 355901.8 | 380088.6 | 640907.2 |
| 630.4582 | 29.96892 | 29.94433 | 30.01567 | 4  | 1 | 3 | 32582.71 | 56161.31 | 50921.8  |
| 543.1582 | 10.61336 | 10.59335 | 10.77882 | 4  | 1 | 3 | 670187.9 | 774122.9 | 1214273  |
| 567.4472 | 40.26525 | 40.22217 | 40.30817 | 6  | 2 | 4 | 279830.9 | 397591.1 | 256851.5 |
| 315.1632 | 43.58767 | 43.5575  | 43.63283 | 6  | 2 | 4 | 44146    | 326695.3 | 187824.5 |
| 340.261  | 9.5558   | 9.474117 | 9.869583 | 11 | 5 | 4 | 8.66E+08 | 1.7E+09  | 1.77E+09 |
| 413.0336 | 25.69158 | 25.64833 | 25.70383 | 6  | 1 | 5 | 156693.8 | 355174.5 | 746289.9 |
| 445.1829 | 33.29417 | 33.23383 | 33.296   | 5  | 5 | 0 | 241857.9 | 638163.6 | 1201720  |
| 670.4605 | 43.2335  | 43.21833 | 43.26267 | 5  | 2 | 3 | 26980.88 | 88830.45 | 46953.65 |
| 526.4775 | 30.19683 | 30.17217 | 30.27583 | 5  | 3 | 2 | 42383.81 | 174337.9 | 144413.4 |
| 660.2914 | 41.19333 | 41.16333 | 41.25083 | 10 | 5 | 5 | 397780.6 | 2008875  | 1494899  |
| 699.4907 | 9.562833 | 9.4856   | 9.7372   | 6  | 4 | 2 | 5301749  | 5157089  | 3752897  |
| 596.2657 | 30.96467 | 30.943   | 31.07383 | 10 | 5 | 5 | 5010493  | 19499798 | 24077933 |
| 652.9682 | 22.7625  | 22.71833 | 22.79867 | 4  | 1 | 3 | 46868.71 | 42332.16 | 69731.08 |
| 352.0616 | 22.10667 | 22.05267 | 22.13033 | 4  | 3 | 1 | 76645.91 | 204983.3 | 216397.6 |
| 451.9359 | 16.95033 | 16.84967 | 16.96167 | 4  | 1 | 3 | 37932.5  | 50689.2  | 97116.49 |
| 526.3809 | 10.07624 | 10.00045 | 10.1429  | 6  | 3 | 3 | 700992.3 | 386477.6 | 608854.1 |
| 369.4236 | 9.476383 | 9.416233 | 9.537367 | 4  | 1 | 3 | 1551595  | 1282610  | 2407372  |
| 358.3684 | 35.11675 | 35.08833 | 35.1745  | 10 | 5 | 5 | 672197.4 | 2043410  | 3432679  |
| 706.9493 | 18.09117 | 18.05967 | 18.155   | 5  | 1 | 4 | 61720.36 | 101585.6 | 174899.8 |
| 708.0393 | 9.4622   | 9.444983 | 9.537367 | 4  | 1 | 3 | 51429832 | 40650349 | 58359608 |
| 596.2656 | 30.03717 | 30.01333 | 30.1315  | 6  | 2 | 4 | 1509025  | 4404098  | 5506710  |
| 488.9737 | 9.4622   | 9.416233 | 9.537367 | 4  | 1 | 3 | 3734022  | 1036536  | 2109369  |
| 438.3335 | 11.38218 | 11.35277 | 11.41203 | 4  | 1 | 3 | 50051.84 | 91737.41 | 71649.77 |
| 347.316  | 40.78925 | 40.73417 | 40.84067 | 6  | 3 | 3 | 61229.37 | 384781   | 301010.4 |
| 290.9479 | 8.65725  | 8.56485  | 8.839167 | 3  | 0 | 3 | 1844808  | 502875.5 | 613768   |
| 514.3955 | 25.92017 | 25.8955  | 25.9855  | 5  | 2 | 3 | 506703.6 | 42440.92 | 58673.33 |
| 239.1758 | 27.05917 | 27       | 27.08533 | 7  | 3 | 4 | 74032.9  | 362741.8 | 294870.6 |
| 627.4688 | 34.38817 | 34.325   | 34.408   | 10 | 5 | 5 | 795259.1 | 1414015  | 1660838  |
| 768.2114 | 30.27817 | 30.24433 | 30.34733 | 5  | 1 | 4 | 92664.61 | 214244.9 | 358870   |
| 816.1269 | 31.03758 | 31.0085  | 31.07383 | 4  | 0 | 4 | 66398.27 | 113684.4 | 189182.7 |
| 216.4823 | 9.52075  | 9.43065  | 9.537367 | 3  | 0 | 3 | 3496339  | 2572083  | 5237708  |
| 1592.211 | 9.541492 | 9.52075  | 9.6125   | 4  | 1 | 3 | 3199406  | 2852992  | 5967588  |
| 338.2625 | 9.490317 | 9.460417 | 9.537367 | 4  | 1 | 3 | 1907670  | 1426091  | 2891809  |

|          |          |          |          |    |   |   |          |          |          |
|----------|----------|----------|----------|----|---|---|----------|----------|----------|
| 613.4182 | 10.0083  | 9.93755  | 10.04445 | 8  | 4 | 4 | 1.11E+08 | 74203172 | 90627468 |
| 1959.278 | 9.496575 | 9.473767 | 9.537367 | 4  | 1 | 3 | 5590877  | 3285843  | 4317973  |
| 907.6893 | 9.832067 | 9.806167 | 9.862433 | 7  | 3 | 4 | 831552.2 | 1162240  | 1456107  |
| 381.3408 | 34.7995  | 34.7655  | 34.82567 | 8  | 3 | 5 | 460538.1 | 662174.9 | 677004.5 |
| 551.8406 | 18.19942 | 18.13833 | 18.24483 | 4  | 0 | 4 | 44674.32 | 93784.62 | 129939.6 |
| 241.1801 | 24.34267 | 24.28833 | 24.35767 | 5  | 3 | 2 | 433248.7 | 1581253  | 1788077  |
| 699.5269 | 39.80917 | 39.75883 | 39.87733 | 4  | 1 | 3 | 113232   | 91141.31 | 71292.24 |
| 389.8217 | 9.266617 | 8.8523   | 9.364433 | 7  | 3 | 4 | 1783567  | 1828951  | 2744270  |
| 420.8971 | 13.75177 | 13.711   | 13.78467 | 3  | 0 | 3 | 68851.77 | 190689.8 | 404677.5 |
| 489.5856 | 9.455083 | 9.416233 | 9.537367 | 4  | 1 | 3 | 8444640  | 2968028  | 6524473  |
| 577.4149 | 29.95408 | 29.9205  | 29.97217 | 10 | 5 | 5 | 742281.8 | 7141903  | 1614621  |
| 216.0851 | 29.87075 | 29.81467 | 29.9265  | 4  | 1 | 3 | 34660.5  | 71025.03 | 95705.86 |
| 513.4194 | 34.6415  | 34.58067 | 34.6825  | 10 | 5 | 5 | 3718956  | 5044069  | 5584015  |
| 430.2449 | 9.48745  | 9.31395  | 9.52075  | 5  | 2 | 3 | 2725543  | 4280272  | 5164616  |
| 389.2549 | 8.920267 | 8.690483 | 9.188017 | 8  | 5 | 3 | 4068902  | 1371790  | 1052015  |
| 281.1389 | 21.49783 | 21.37017 | 21.52233 | 6  | 3 | 3 | 200840.1 | 462702.4 | 336098   |
| 728.3642 | 10.87198 | 10.85052 | 10.93685 | 4  | 1 | 3 | 636619.9 | 653309.7 | 1189120  |
| 666.4708 | 29.8875  | 29.85533 | 29.90167 | 10 | 5 | 5 | 152264.3 | 1564314  | 344314.9 |
| 505.8771 | 44.182   | 44.14433 | 44.22817 | 7  | 4 | 3 | 89717.04 | 906743.6 | 56845.7  |
| 583.4423 | 34.46683 | 34.41633 | 34.48983 | 9  | 4 | 5 | 1447315  | 2071068  | 2305774  |
| 216.2748 | 9.5169   | 9.49235  | 9.537367 | 3  | 0 | 3 | 8584370  | 4952826  | 10131031 |
| 441.0647 | 32.12508 | 32.088   | 32.1605  | 6  | 1 | 5 | 58294.55 | 143752.4 | 299013.2 |
| 177.0088 | 19.35933 | 19.309   | 19.43083 | 5  | 2 | 3 | 75354.97 | 191829   | 229511.9 |
| 452.3319 | 8.946467 | 8.78305  | 9.14945  | 5  | 3 | 2 | 959930.3 | 3224096  | 3384594  |
| 599.4194 | 9.626008 | 9.577667 | 9.654    | 6  | 2 | 4 | 10732341 | 8920702  | 9693845  |
| 518.4048 | 31.01317 | 30.9075  | 31.10333 | 10 | 5 | 5 | 624816.3 | 2570281  | 1566036  |
| 529.2764 | 28.11733 | 28.103   | 28.20567 | 5  | 3 | 2 | 97060.51 | 259610.7 | 303445.6 |
| 252.1316 | 24.71383 | 24.66817 | 24.73533 | 7  | 3 | 4 | 141909   | 519201.4 | 614219.4 |
| 582.4733 | 43.0915  | 43.05483 | 43.26217 | 10 | 5 | 5 | 130932.7 | 872478.8 | 70781.24 |
| 227.0481 | 22.76317 | 22.73267 | 22.7825  | 5  | 2 | 3 | 77162.31 | 56803.02 | 62308.94 |
| 562.26   | 29.78242 | 29.76983 | 29.88483 | 8  | 3 | 5 | 302623.7 | 1024320  | 1223113  |
| 221.1176 | 26.31033 | 26.23883 | 26.369   | 10 | 5 | 5 | 2145795  | 8721537  | 8914973  |
| 728.4389 | 10.67897 | 10.58428 | 10.77118 | 9  | 4 | 5 | 2032174  | 3469977  | 4677816  |
| 658.5113 | 36.20942 | 36.15767 | 36.22733 | 4  | 1 | 3 | 431306.8 | 3029129  | 2891570  |
| 791.5944 | 25.78433 | 25.77183 | 25.822   | 7  | 3 | 4 | 106362.9 | 855253.2 | 1073024  |
| 424.3637 | 34.7655  | 34.73383 | 34.78    | 10 | 5 | 5 | 5807577  | 9179040  | 9958890  |
| 524.277  | 28.3815  | 28.2795  | 28.46717 | 7  | 5 | 2 | 288887.8 | 815374.6 | 1267198  |
| 363.3109 | 34.79217 | 34.764   | 34.82567 | 10 | 5 | 5 | 2867844  | 6164464  | 6706470  |
| 661.2953 | 41.20042 | 41.178   | 41.22267 | 8  | 5 | 3 | 62996.89 | 237948.1 | 184163.4 |
| 705.4137 | 9.537367 | 9.460417 | 9.64025  | 5  | 1 | 3 | 62149192 | 11473446 | 24207793 |
| 628.4726 | 34.39008 | 34.38167 | 34.408   | 6  | 2 | 4 | 240992.5 | 243013.8 | 295462.4 |
| 259.202  | 10.41848 | 10.36523 | 10.45412 | 9  | 4 | 5 | 28076110 | 83223026 | 1.07E+08 |
| 655.242  | 30.76958 | 30.48833 | 30.84967 | 4  | 1 | 3 | 74475.55 | 90481.45 | 202322.7 |
| 251.1862 | 9.30105  | 9.17955  | 9.415217 | 5  | 1 | 3 | 1536326  | 677181.6 | 489472.3 |
| 267.1753 | 10.67863 | 10.63273 | 10.77118 | 6  | 1 | 5 | 203294.6 | 775758.5 | 705263.8 |
| 546.4636 | 22.459   | 22.40867 | 22.4765  | 9  | 4 | 5 | 187100.2 | 715344.7 | 728018.9 |
| 621.4273 | 43.63283 | 43.60467 | 43.6335  | 3  | 3 | 0 | 103261.1 | 680986.7 | 251010.5 |

|          |          |          |          |    |   |   |          |          |          |
|----------|----------|----------|----------|----|---|---|----------|----------|----------|
| 514.3504 | 10.79319 | 10.71577 | 10.9188  | 10 | 5 | 5 | 1399137  | 2051005  | 2804940  |
| 308.1897 | 38.11367 | 38.08417 | 38.19117 | 3  | 3 | 0 | 31739.08 | 169487.4 | 120117.8 |
| 590.3929 | 43.61617 | 43.60117 | 43.6195  | 5  | 1 | 4 | 105249.4 | 607614.4 | 246884.2 |
| 531.2744 | 40.20283 | 40.01267 | 40.2525  | 7  | 2 | 4 | 181935.4 | 1580434  | 1848056  |
| 212.4985 | 9.522017 | 9.460417 | 9.545617 | 4  | 1 | 3 | 2466760  | 2215429  | 4463093  |
| 471.5339 | 30.27992 | 30.24433 | 30.32083 | 4  | 1 | 3 | 140852.7 | 194266   | 434392.1 |
| 333.1252 | 9.47815  | 9.473767 | 9.537367 | 5  | 2 | 3 | 32299340 | 27421111 | 44009713 |
| 488.1971 | 10.73468 | 10.64867 | 10.79782 | 6  | 2 | 4 | 718154.3 | 2257837  | 1325176  |
| 710.4972 | 29.85242 | 29.83967 | 29.871   | 10 | 5 | 5 | 175427.5 | 1602460  | 286882.7 |
| 375.8983 | 9.475958 | 9.460417 | 9.537367 | 4  | 1 | 3 | 26834598 | 20764080 | 40930991 |
| 410.7025 | 10.63273 | 10.55548 | 10.75237 | 7  | 2 | 4 | 295487.8 | 302038.7 | 450555.2 |
| 656.6855 | 9.515    | 9.444983 | 9.584867 | 5  | 2 | 3 | 13733852 | 12753914 | 21260592 |
| 214.5803 | 10.68814 | 10.60902 | 10.75237 | 6  | 1 | 5 | 471124   | 574041.4 | 746689.7 |
| 212.1366 | 15.85238 | 15.82188 | 15.895   | 4  | 0 | 4 | 843577.6 | 15116.77 | 6811.624 |
| 563.8153 | 29.21392 | 29.16983 | 29.24733 | 4  | 3 | 1 | 172073.5 | 348377.9 | 569510.9 |
| 448.0697 | 18.6185  | 18.58133 | 18.63767 | 8  | 3 | 5 | 1097730  | 3101912  | 5185080  |
| 268.6256 | 28.583   | 28.5565  | 28.67283 | 6  | 2 | 4 | 89146.38 | 187676   | 342117.1 |
| 420.2832 | 24.91983 | 24.87683 | 24.947   | 7  | 3 | 4 | 124168.5 | 482754   | 350467.4 |
| 680.4387 | 20.99133 | 20.96633 | 21.01983 | 5  | 1 | 4 | 246449.1 | 587081.9 | 824694   |
| 225.1895 | 9.511617 | 9.460417 | 9.537367 | 4  | 1 | 3 | 2276385  | 1859993  | 3216601  |
| 343.2409 | 19.15933 | 19.12883 | 19.23467 | 5  | 2 | 3 | 263343   | 947633.9 | 1152055  |
| 539.4158 | 34.56717 | 34.50733 | 34.85617 | 11 | 5 | 5 | 1926992  | 3047895  | 3424318  |
| 606.4635 | 23.34267 | 23.271   | 23.3835  | 10 | 5 | 5 | 369683.8 | 1728637  | 1852215  |
| 435.2048 | 28.958   | 28.94617 | 29.0025  | 6  | 2 | 4 | 88664.18 | 236870.5 | 294090.7 |
| 366.3218 | 31.73375 | 31.711   | 31.78083 | 10 | 5 | 5 | 297950.3 | 842375.5 | 978634.9 |
| 815.1304 | 31.02333 | 30.9645  | 31.07383 | 6  | 1 | 5 | 83371.48 | 171636.1 | 358520.9 |
| 783.3893 | 9.527133 | 9.506667 | 9.6125   | 4  | 1 | 3 | 5883604  | 7274268  | 12586903 |
| 382.2266 | 43.60467 | 43.58733 | 43.63033 | 3  | 3 | 0 | 74215.89 | 1127742  | 259895.5 |
| 469.3932 | 34.71833 | 34.67217 | 34.7335  | 10 | 5 | 5 | 2429896  | 2943042  | 3263459  |
| 332.4386 | 9.47815  | 9.473767 | 9.537367 | 5  | 2 | 3 | 17411582 | 17038082 | 27045568 |
| 407.3249 | 23.28167 | 23.22467 | 23.32617 | 5  | 4 | 1 | 105512.7 | 279184.4 | 338142.8 |
| 705.9138 | 9.537367 | 9.463983 | 9.545617 | 3  | 0 | 3 | 50761064 | 10976053 | 22963129 |
| 618.4386 | 33.39917 | 33.3665  | 33.46717 | 5  | 2 | 3 | 68791.74 | 218689.2 | 94270.1  |
| 226.217  | 12.89718 | 12.87568 | 13.00055 | 8  | 3 | 5 | 589460.8 | 577746.9 | 191935.3 |
| 563.2637 | 29.80892 | 29.78167 | 29.89933 | 6  | 2 | 4 | 77046.48 | 201095.9 | 227225.1 |
| 635.6431 | 9.497658 | 9.460417 | 9.537367 | 4  | 1 | 3 | 4136990  | 2392058  | 5107345  |
| 229.5281 | 9.534967 | 9.502483 | 9.537367 | 3  | 0 | 3 | 10348502 | 6337077  | 12987390 |
| 215.8693 | 9.522017 | 9.502483 | 9.5571   | 4  | 1 | 3 | 17431844 | 12565830 | 26605241 |
| 678.2537 | 9.565158 | 9.506667 | 9.64025  | 4  | 1 | 3 | 7764884  | 3785366  | 4986612  |
| 318.1188 | 30.84067 | 30.73283 | 30.89783 | 8  | 5 | 3 | 169056.9 | 1315837  | 1383650  |
| 296.1312 | 32.146   | 32.0875  | 32.19083 | 9  | 4 | 5 | 1720376  | 5170784  | 10053369 |
| 236.0696 | 23.18767 | 23.14433 | 23.196   | 6  | 2 | 4 | 62768.4  | 110509.6 | 127001.8 |
| 425.3669 | 34.76917 | 34.73383 | 34.78    | 9  | 4 | 5 | 1374347  | 1733908  | 1897039  |
| 320.1766 | 18.22633 | 18.21417 | 18.24483 | 3  | 0 | 3 | 273459.3 | 266315.9 | 128675.7 |
| 396.2276 | 9.18575  | 9.0532   | 9.253383 | 4  | 3 | 1 | 758011.9 | 2103258  | 2111424  |
| 344.9726 | 21.6935  | 21.4985  | 21.7275  | 7  | 2 | 5 | 87801.93 | 214271.7 | 281484.8 |
| 518.1934 | 10.37933 | 10.34782 | 10.43838 | 7  | 4 | 2 | 1160027  | 1992628  | 2951266  |



|          |          |          |          |    |   |   |          |          |          |
|----------|----------|----------|----------|----|---|---|----------|----------|----------|
| 429.7266 | 10.3949  | 10.37933 | 10.42227 | 5  | 1 | 4 | 1615651  | 1599210  | 2503358  |
| 558.4218 | 25.99217 | 25.95383 | 26.01533 | 5  | 2 | 3 | 549383.6 | 77796.65 | 99805.13 |
| 700.4467 | 9.463983 | 9.444983 | 9.537367 | 5  | 2 | 3 | 99919864 | 72617024 | 1.19E+08 |
| 677.0049 | 9.537367 | 9.531333 | 9.549217 | 3  | 0 | 3 | 5972538  | 2030400  | 3678450  |
| 358.8488 | 9.47815  | 9.460417 | 9.537367 | 5  | 2 | 3 | 26789204 | 20886807 | 40836026 |
| 443.0653 | 32.13575 | 32.05783 | 32.1605  | 6  | 1 | 5 | 237357.1 | 561507.6 | 1145774  |
| 719.4064 | 17.22208 | 17.1625  | 17.25317 | 8  | 3 | 5 | 190600.9 | 443218.5 | 722783.5 |
| 817.6267 | 7.179683 | 7.1138   | 7.220567 | 4  | 1 | 3 | 411073.8 | 124688.6 | 199102.3 |
| 614.4217 | 10.0083  | 9.93755  | 10.04445 | 8  | 4 | 4 | 39065608 | 24389459 | 30326548 |
| 593.9303 | 43.60167 | 43.55567 | 43.649   | 10 | 5 | 5 | 159049.5 | 1180164  | 354576.3 |
| 364.6021 | 30.26683 | 30.24433 | 30.30783 | 5  | 1 | 4 | 57609.18 | 87849.07 | 187032.4 |
| 795.6446 | 7.179683 | 7.09035  | 7.220567 | 4  | 1 | 3 | 247862.7 | 113908.6 | 185252.3 |
| 303.2489 | 38.85333 | 38.8515  | 38.89767 | 3  | 0 | 3 | 1776226  | 45128.86 | 13541.6  |
| 914.4607 | 41.22258 | 41.20717 | 41.2825  | 4  | 3 | 1 | 57031.25 | 240365   | 251241.4 |
| 313.6414 | 30.27292 | 30.24533 | 30.36167 | 8  | 3 | 5 | 293817.1 | 703375.1 | 1171313  |
| 306.2433 | 13.18253 | 13.15378 | 13.22525 | 6  | 3 | 3 | 223132.3 | 364463.2 | 154937.8 |
| 389.0244 | 9.697525 | 9.671033 | 9.76485  | 8  | 4 | 4 | 493316   | 469392.3 | 559960.5 |
| 239.1282 | 12.96948 | 12.84737 | 13.10903 | 10 | 5 | 5 | 7640791  | 7294649  | 7205547  |
| 454.1713 | 23.1945  | 23.10367 | 23.22367 | 7  | 3 | 4 | 101623.1 | 383991   | 349785.4 |
| 228.2689 | 22.39133 | 22.327   | 22.43817 | 9  | 4 | 5 | 510279.9 | 174732   | 136946.5 |
| 327.5938 | 31.00867 | 30.9645  | 31.09567 | 5  | 1 | 3 | 64074.36 | 82807.95 | 174581.3 |
| 203.8872 | 9.51595  | 9.49235  | 9.537367 | 4  | 1 | 3 | 4749754  | 4945483  | 4740249  |
| 347.9957 | 9.47815  | 9.473767 | 9.537367 | 5  | 2 | 3 | 36933784 | 31359570 | 50365781 |
| 415.181  | 15.29115 | 15.205   | 15.30375 | 3  | 3 | 0 | 321380.6 | 826519.7 | 1511855  |
| 729.8376 | 19.369   | 19.33867 | 19.37883 | 4  | 1 | 3 | 38206.14 | 31310.21 | 60116.92 |
| 358.8579 | 9.475958 | 9.460417 | 9.537367 | 4  | 1 | 3 | 9746555  | 8707543  | 17765771 |
| 496.3926 | 34.6415  | 34.63533 | 34.658   | 8  | 3 | 5 | 640430.5 | 867848.7 | 991082.6 |
| 823.6104 | 34.04908 | 33.9905  | 34.07833 | 6  | 2 | 4 | 90584.27 | 126693.4 | 158064.8 |
| 342.2981 | 9.483542 | 9.444983 | 9.537367 | 4  | 1 | 3 | 1890865  | 2090718  | 3306380  |
| 411.2077 | 22.119   | 22.03667 | 22.136   | 8  | 4 | 4 | 817779.3 | 2061286  | 2433862  |
| 543.3888 | 11.72863 | 11.68558 | 11.92125 | 7  | 3 | 4 | 1204140  | 2220839  | 2497775  |
| 549.1282 | 22.12592 | 22.03667 | 22.14983 | 6  | 2 | 4 | 360402.8 | 773486.3 | 1092513  |
| 426.37   | 34.74983 | 34.73667 | 34.77783 | 3  | 0 | 3 | 103908   | 93039.13 | 110132.2 |
| 335.2224 | 14.8621  | 14.8097  | 14.96778 | 9  | 4 | 5 | 383457.9 | 2074897  | 1992498  |
| 629.4717 | 40.12467 | 40.04767 | 40.12633 | 3  | 0 | 3 | 1744469  | 2053328  | 1258780  |
| 457.9291 | 18.135   | 18.03217 | 18.18483 | 4  | 0 | 4 | 113970.1 | 463633.7 | 718280.8 |
| 374.2277 | 9.541233 | 9.395833 | 9.819583 | 7  | 2 | 3 | 4304748  | 7304393  | 10838305 |
| 461.1961 | 15.68959 | 15.61248 | 15.71387 | 6  | 3 | 3 | 899277.8 | 2409965  | 4562058  |
| 657.6383 | 9.463983 | 9.444983 | 9.537367 | 5  | 2 | 3 | 41516608 | 31129257 | 55882962 |
| 462.039  | 21.16017 | 21.149   | 21.17    | 4  | 1 | 3 | 38061.91 | 37362.97 | 46833.72 |
| 461.2658 | 22.33283 | 22.27717 | 22.38517 | 9  | 4 | 5 | 125439.3 | 510737.3 | 530577.8 |
| 478.9243 | 22.14467 | 22.03667 | 22.201   | 7  | 2 | 5 | 172047.1 | 834102.9 | 1182540  |
| 1871.116 | 9.49235  | 9.460417 | 9.537367 | 5  | 2 | 3 | 7482528  | 8997332  | 13717432 |
| 726.8276 | 34.2275  | 34.19083 | 34.2315  | 5  | 2 | 3 | 58590.19 | 46579.94 | 63790.69 |
| 575.343  | 30.25    | 30.23    | 30.48633 | 3  | 3 | 0 | 101116.7 | 261842.9 | 486860.3 |
| 433.5184 | 27.516   | 27.41117 | 27.77533 | 7  | 1 | 5 | 129476.7 | 444395   | 657900.1 |
| 371.0087 | 25.693   | 25.68617 | 25.69883 | 4  | 1 | 3 | 62192.63 | 126441   | 250065.5 |

|          |          |          |          |    |   |   |          |          |          |
|----------|----------|----------|----------|----|---|---|----------|----------|----------|
| 439.3172 | 13.06491 | 13.0354  | 13.17767 | 8  | 3 | 5 | 64172.49 | 219990.3 | 227446.5 |
| 448.8921 | 13.70376 | 13.63635 | 13.76397 | 6  | 2 | 4 | 108497.6 | 510125.5 | 1062824  |
| 350.2685 | 9.4622   | 9.116917 | 9.545617 | 6  | 3 | 3 | 9480323  | 3250511  | 5104273  |
| 553.3123 | 32.11658 | 32.11483 | 32.117   | 4  | 4 | 0 | 493835   | 1180536  | 2262088  |
| 245.0839 | 21.69533 | 21.57183 | 21.7275  | 8  | 3 | 5 | 310770.7 | 923858.6 | 1046853  |
| 479.8068 | 9.189283 | 9.101033 | 9.266617 | 6  | 3 | 3 | 9098724  | 5585325  | 5624070  |
| 432.2025 | 11.90403 | 11.87143 | 12.06333 | 10 | 5 | 5 | 1316158  | 4438217  | 6032084  |
| 675.4824 | 9.870633 | 9.858417 | 9.91985  | 6  | 3 | 3 | 560421.9 | 992963.7 | 1126164  |
| 517.9029 | 31.03117 | 30.93633 | 31.094   | 9  | 5 | 4 | 1178055  | 4504246  | 2312442  |
| 359.6187 | 9.500283 | 9.460417 | 9.545617 | 5  | 2 | 3 | 9282675  | 8437775  | 16528183 |
| 290.0515 | 11.05192 | 10.83542 | 11.1144  | 5  | 1 | 4 | 1409562  | 3024531  | 5395581  |
| 699.3998 | 9.482133 | 9.444983 | 9.537367 | 4  | 1 | 3 | 43406192 | 35382998 | 57359873 |
| 754.2337 | 30.25967 | 30.23533 | 30.3055  | 4  | 3 | 1 | 36129.73 | 133628.6 | 137497.4 |
| 712.5184 | 9.463983 | 9.416233 | 9.5558   | 5  | 2 | 3 | 5602392  | 4637617  | 3891889  |
| 280.1628 | 30.8495  | 30.73283 | 30.88867 | 10 | 5 | 5 | 11361287 | 61901564 | 44628868 |
| 367.4307 | 9.476383 | 9.43065  | 9.537367 | 4  | 1 | 3 | 6936412  | 2940972  | 4818476  |
| 468.0664 | 21.69333 | 21.67933 | 21.7275  | 5  | 3 | 2 | 90528.68 | 367682.2 | 440046   |
| 539.4175 | 9.291417 | 9.210417 | 9.3496   | 7  | 3 | 4 | 4253009  | 4854403  | 4087856  |
| 558.088  | 24.34283 | 24.238   | 24.35717 | 7  | 2 | 5 | 229075.8 | 536925.3 | 965082.7 |
| 342.6825 | 10.87918 | 10.86477 | 10.93685 | 5  | 1 | 4 | 553140.1 | 602504.7 | 1006595  |
| 156.9252 | 9.5169   | 9.49235  | 9.537367 | 3  | 0 | 3 | 3358888  | 1559335  | 3263647  |
| 401.0349 | 32.13283 | 32.07267 | 32.14983 | 6  | 1 | 5 | 217154.8 | 557442.9 | 1228080  |
| 511.3591 | 32.48992 | 32.43117 | 32.60533 | 4  | 3 | 1 | 106981.8 | 671092   | 537189.1 |
| 818.6301 | 7.179767 | 7.138117 | 7.235117 | 4  | 1 | 3 | 165816.3 | 45018.08 | 78072.63 |
| 641.2698 | 22.11558 | 22.02083 | 22.14983 | 6  | 3 | 3 | 276088.2 | 815815.7 | 1086760  |
| 1584.13  | 9.518825 | 9.460417 | 9.537367 | 4  | 1 | 3 | 2955017  | 2527982  | 5311009  |
| 545.3824 | 28.19175 | 28.11883 | 28.20567 | 6  | 3 | 3 | 512731.4 | 1161278  | 1934053  |
| 627.295  | 32.71783 | 32.6565  | 32.84617 | 5  | 2 | 3 | 78984.66 | 148494.3 | 248158.6 |
| 359.9924 | 22.12233 | 22.10767 | 22.14983 | 4  | 0 | 4 | 95966.48 | 263157.3 | 416567.6 |
| 479.306  | 9.236417 | 9.168467 | 9.266783 | 5  | 2 | 3 | 14227487 | 8840033  | 13924747 |
| 481.3753 | 9.77065  | 9.480383 | 9.817433 | 8  | 4 | 4 | 622601.7 | 916942.1 | 1220696  |
| 217.1803 | 21.13817 | 21.04633 | 21.15517 | 7  | 3 | 4 | 582984.4 | 2297188  | 1861654  |
| 562.9608 | 21.15267 | 21.12367 | 21.16317 | 5  | 2 | 3 | 113361.7 | 249133.7 | 356281.6 |
| 249.0248 | 11.06623 | 11.02277 | 11.09677 | 5  | 1 | 4 | 4174555  | 10468299 | 19761896 |
| 430.293  | 29.65167 | 29.593   | 29.66617 | 4  | 3 | 1 | 54156.2  | 222099.8 | 103945.2 |
| 628.4402 | 43.3445  | 43.30783 | 43.4255  | 4  | 1 | 3 | 52841.21 | 451127.4 | 99562.23 |
| 792.8997 | 10.67828 | 10.66922 | 10.67897 | 3  | 0 | 3 | 1262444  | 1164931  | 2376220  |
| 637.5389 | 7.23515  | 7.161867 | 7.281467 | 4  | 1 | 3 | 214541.8 | 59027.16 | 95142.1  |
| 243.1788 | 10.40915 | 10.0411  | 10.45412 | 13 | 5 | 5 | 3312814  | 10194930 | 11932920 |
| 389.1122 | 31.5575  | 31.48483 | 31.6035  | 10 | 5 | 5 | 1194670  | 7454485  | 3818819  |
| 312.1654 | 32.5195  | 32.38817 | 32.61133 | 4  | 3 | 1 | 50335.24 | 158822.6 | 237197.6 |
| 567.2086 | 30.2555  | 30.23533 | 30.33317 | 6  | 3 | 3 | 31403.1  | 124199.9 | 121951.6 |
| 340.2902 | 9.45735  | 9.43065  | 9.685033 | 5  | 1 | 3 | 6.52E+08 | 6.39E+08 | 1.3E+09  |
| 177.0549 | 24.70783 | 24.66817 | 24.75017 | 7  | 3 | 4 | 427846.1 | 2240437  | 2256097  |
| 305.2116 | 31.91467 | 31.86833 | 31.92733 | 4  | 0 | 4 | 179638.7 | 677377.1 | 701354.8 |
| 172.5947 | 9.463983 | 9.459367 | 9.537367 | 5  | 2 | 3 | 8584303  | 11793045 | 16803560 |
| 294.2069 | 26.31033 | 26.23883 | 26.369   | 10 | 5 | 5 | 2120741  | 8914563  | 9337438  |

|          |          |          |          |    |   |   |          |          |          |
|----------|----------|----------|----------|----|---|---|----------|----------|----------|
| 390.1045 | 22.753   | 22.71633 | 22.78383 | 7  | 2 | 5 | 433173.1 | 708313.6 | 927755.5 |
| 300.1264 | 18.12142 | 18.04133 | 18.18667 | 10 | 4 | 5 | 400756.7 | 1209375  | 2147188  |
| 693.529  | 9.777783 | 9.738317 | 9.822817 | 9  | 5 | 4 | 2155579  | 3830042  | 4965679  |
| 693.4948 | 9.49235  | 9.471017 | 9.5558   | 5  | 3 | 2 | 18348826 | 11035643 | 8860055  |
| 337.2129 | 10.41907 | 10.37933 | 10.46653 | 8  | 4 | 4 | 7680092  | 25354067 | 30327875 |
| 290.1392 | 28.58517 | 28.54167 | 28.68783 | 5  | 2 | 3 | 38426.06 | 62547.89 | 105237.7 |
| 522.0548 | 13.02587 | 12.99103 | 13.05092 | 4  | 1 | 3 | 244444.5 | 205890.1 | 430944.3 |
| 342.1918 | 15.45593 | 15.44312 | 15.49818 | 8  | 3 | 5 | 47397.56 | 291254.9 | 178177.1 |
| 521.1598 | 10.65784 | 10.62195 | 10.78962 | 4  | 1 | 3 | 228623.7 | 704264.2 | 564738.7 |
| 512.3357 | 27.23967 | 27.22267 | 27.31367 | 7  | 3 | 4 | 102314.9 | 301414.4 | 142125.8 |
| 567.9337 | 10.08161 | 10.02378 | 10.14968 | 6  | 4 | 2 | 486127.3 | 671849.5 | 750964.1 |
| 456.1876 | 10.38373 | 10.33325 | 10.41848 | 5  | 2 | 3 | 1381782  | 1668256  | 3096290  |
| 698.4883 | 9.489492 | 9.186383 | 9.584433 | 8  | 3 | 3 | 20025566 | 38785170 | 45489966 |
| 737.4162 | 41.21533 | 41.17817 | 41.27017 | 4  | 4 | 0 | 40745.68 | 116468.3 | 140842.4 |
| 330.236  | 31.59733 | 31.51383 | 31.64483 | 5  | 3 | 2 | 44426.28 | 120771   | 95917.05 |
| 282.1946 | 10.86485 | 10.80215 | 10.95503 | 7  | 3 | 4 | 438888.4 | 500675.9 | 669206.6 |
| 380.2772 | 34.13283 | 34.11217 | 34.1575  | 5  | 2 | 3 | 73183.91 | 147526.5 | 155764.6 |
| 754.2005 | 30.819   | 30.81667 | 30.93717 | 4  | 3 | 1 | 57914.56 | 173498.4 | 146946.9 |
| 318.8512 | 19.36225 | 19.32383 | 19.37367 | 6  | 2 | 4 | 33689.66 | 117176.9 | 96299.85 |
| 667.3384 | 9.250667 | 9.101033 | 9.257833 | 5  | 2 | 3 | 7035255  | 4583453  | 7676432  |
| 359.4215 | 9.476383 | 9.43065  | 9.537367 | 4  | 1 | 3 | 2856334  | 3045110  | 3991655  |
| 168.0747 | 21.15267 | 21.082   | 21.44917 | 7  | 2 | 4 | 76428.69 | 112275.3 | 128711.5 |
| 623.8028 | 10.86477 | 10.81753 | 10.93685 | 7  | 3 | 4 | 249028.3 | 411283.6 | 618099.9 |
| 454.3381 | 26.55617 | 26.51633 | 26.577   | 5  | 2 | 3 | 464851.1 | 675852.4 | 690069.9 |
| 331.2558 | 9.537367 | 9.488017 | 9.866317 | 9  | 5 | 3 | 14445776 | 35097155 | 43218747 |
| 504.8905 | 27.67592 | 27.61883 | 27.83517 | 10 | 5 | 5 | 410209.2 | 2048306  | 1935716  |
| 375.8794 | 9.475958 | 9.460417 | 9.537367 | 4  | 1 | 3 | 9494899  | 9968003  | 16978676 |
| 629.441  | 10.86477 | 10.80383 | 10.93685 | 9  | 4 | 5 | 12228073 | 20998128 | 30043064 |
| 504.0233 | 42.72867 | 42.65433 | 42.75867 | 5  | 2 | 3 | 59097.34 | 534690.2 | 128926.7 |
| 642.4798 | 37.54142 | 37.49183 | 37.63617 | 10 | 5 | 5 | 250228   | 1322588  | 1339888  |
| 211.1695 | 25.04083 | 25.02783 | 25.12283 | 5  | 2 | 3 | 446329.9 | 3852363  | 5502352  |
| 196.0928 | 22.37017 | 22.27817 | 22.38517 | 7  | 2 | 5 | 128006   | 255245.5 | 366834.2 |
| 555.4455 | 38.66925 | 38.64067 | 38.86817 | 10 | 5 | 5 | 480916.5 | 2202784  | 1360572  |
| 694.4975 | 9.44975  | 9.394733 | 9.537367 | 5  | 2 | 3 | 5222444  | 3165830  | 1433242  |
| 314.3058 | 29.96358 | 29.93583 | 30.01183 | 10 | 5 | 5 | 752593.8 | 3608233  | 2206108  |
| 596.2647 | 29.21375 | 29.19917 | 29.31467 | 4  | 1 | 3 | 251308.8 | 926042.3 | 964677.3 |
| 409.3067 | 11.27315 | 11.26468 | 11.54758 | 7  | 3 | 4 | 233513.1 | 778629.8 | 794389.5 |
| 326.2635 | 9.537367 | 9.50195  | 9.584433 | 7  | 5 | 2 | 3457727  | 4255951  | 4909676  |
| 377.3303 | 9.504742 | 9.460417 | 9.537367 | 4  | 1 | 3 | 3008494  | 2287358  | 4466742  |
| 357.2172 | 9.314158 | 8.991783 | 9.5558   | 8  | 2 | 5 | 3246562  | 2507012  | 2714338  |
| 632.7019 | 9.529058 | 9.460417 | 9.545617 | 4  | 1 | 3 | 3493202  | 3430734  | 7126626  |
| 279.1594 | 30.8495  | 30.73283 | 30.88867 | 10 | 5 | 5 | 62928832 | 3.5E+08  | 2.45E+08 |
| 490.326  | 11.74213 | 11.68558 | 11.79652 | 6  | 3 | 3 | 263795.4 | 515215.4 | 534297.9 |
| 236.1649 | 20.97717 | 20.93367 | 21.00683 | 5  | 3 | 2 | 76041.5  | 283679.2 | 346464.6 |
| 274.6257 | 27.77533 | 27.765   | 27.84883 | 5  | 1 | 4 | 984992.7 | 4224951  | 5748258  |
| 414.178  | 15.27613 | 15.21587 | 15.37675 | 9  | 5 | 4 | 1723958  | 5140922  | 9413046  |
| 603.4775 | 34.48867 | 34.46633 | 34.49683 | 4  | 1 | 3 | 139938.7 | 123732.8 | 155843.3 |

|          |          |          |          |    |   |   |          |          |          |
|----------|----------|----------|----------|----|---|---|----------|----------|----------|
| 452.3666 | 34.70333 | 34.69    | 34.72917 | 9  | 5 | 4 | 690645.2 | 1009562  | 1166522  |
| 459.2014 | 12.19923 | 12.18742 | 12.22837 | 3  | 0 | 3 | 31219.79 | 49742.11 | 32143.61 |
| 376.935  | 9.514858 | 9.446567 | 9.545617 | 4  | 1 | 3 | 5813956  | 4444633  | 8532105  |
| 470.3964 | 34.71475 | 34.704   | 34.74033 | 6  | 2 | 4 | 248174.6 | 284242.9 | 172111.9 |
| 753.3809 | 43.5725  | 43.4875  | 43.646   | 4  | 1 | 3 | 39741.09 | 121750.7 | 97589.63 |
| 576.0586 | 22.768   | 22.66833 | 22.79867 | 6  | 1 | 4 | 92821.02 | 117099.5 | 167938.4 |
| 658.593  | 9.463983 | 9.444983 | 9.537367 | 5  | 2 | 3 | 46743408 | 37446639 | 66468521 |
| 679.6088 | 9.488017 | 9.421367 | 9.596683 | 5  | 3 | 2 | 42496660 | 23639854 | 21450997 |
| 224.0999 | 30.49325 | 30.36167 | 30.5025  | 6  | 3 | 3 | 87426.73 | 355988.8 | 422012.1 |
| 340.2491 | 18.30483 | 18.25767 | 18.336   | 3  | 0 | 3 | 30746.81 | 156848.8 | 33667.47 |
| 358.9884 | 22.11875 | 22.05267 | 22.201   | 8  | 3 | 5 | 1116606  | 4568501  | 7768691  |
| 1983.128 | 9.47815  | 9.460417 | 9.537367 | 5  | 2 | 3 | 43519864 | 23145752 | 33546289 |
| 319.2847 | 34.75625 | 34.7185  | 34.77633 | 10 | 5 | 5 | 1469671  | 6516088  | 7164999  |
| 395.3274 | 21.36517 | 21.27433 | 21.39333 | 7  | 3 | 4 | 59094.13 | 141721.9 | 149040.4 |
| 558.4488 | 34.57    | 34.55133 | 34.58567 | 7  | 3 | 4 | 1054267  | 1438960  | 728098.7 |
| 554.394  | 42.3715  | 42.34217 | 42.39517 | 4  | 1 | 3 | 43005.07 | 278761.7 | 31903.6  |
| 594.2704 | 30.96517 | 30.928   | 31.07383 | 9  | 4 | 5 | 254957.7 | 883111.8 | 1127749  |
| 487.3593 | 29.64442 | 29.54933 | 29.66617 | 4  | 3 | 1 | 35233.32 | 114108.2 | 136485.8 |
| 357.1557 | 9.469283 | 9.43065  | 9.537367 | 4  | 1 | 3 | 3435494  | 2276010  | 2698508  |
| 280.1053 | 27.446   | 27.29967 | 27.463   | 5  | 2 | 3 | 48330.14 | 172843.2 | 170114.8 |
| 1588.624 | 9.53435  | 9.49235  | 9.6125   | 4  | 1 | 3 | 6895061  | 7390595  | 15817335 |
| 1966.203 | 9.474117 | 9.463983 | 9.537367 | 5  | 2 | 3 | 24628690 | 18075084 | 24220178 |
| 443.0314 | 31.51733 | 31.4425  | 31.53917 | 5  | 1 | 4 | 51495.67 | 116681   | 237896.6 |
| 400.3429 | 32.98008 | 32.93317 | 33.05117 | 8  | 3 | 5 | 92277.82 | 595657.9 | 257124.2 |
| 490.2911 | 26.21033 | 26.18667 | 26.27567 | 9  | 5 | 4 | 187863.2 | 648771   | 714514   |
| 686.5062 | 37.40408 | 37.37167 | 37.50733 | 10 | 5 | 5 | 222072.8 | 1239232  | 1304709  |
| 350.2176 | 44.44433 | 44.344   | 44.57383 | 5  | 1 | 3 | 56307.27 | 616064.5 | 208273.4 |
| 629.0754 | 19.57533 | 19.50067 | 19.5915  | 5  | 2 | 3 | 72142.27 | 113966.1 | 224459.1 |
| 567.4317 | 10.11443 | 9.828633 | 10.1429  | 9  | 5 | 4 | 3061560  | 3585455  | 4808342  |
| 457.1848 | 10.38171 | 10.36242 | 10.43652 | 6  | 2 | 4 | 1815574  | 2949756  | 4367992  |
| 278.0463 | 19.35933 | 19.32383 | 19.46583 | 5  | 3 | 2 | 70556.32 | 211017.7 | 272651.5 |
| 362.2699 | 19.15833 | 19.12233 | 19.20017 | 7  | 2 | 5 | 58384.38 | 111178.4 | 89714.16 |
| 607.3601 | 25.04083 | 24.9975  | 25.06317 | 7  | 4 | 3 | 262958.6 | 613222.8 | 761712.2 |
| 333.1949 | 10.84885 | 10.81963 | 10.88395 | 8  | 4 | 4 | 415436.8 | 376511.9 | 467781.7 |
| 699.5332 | 9.2143   | 9.116917 | 9.44975  | 8  | 4 | 3 | 5658264  | 2086161  | 1910499  |
| 1041.69  | 30.89133 | 30.87817 | 31.00883 | 4  | 3 | 1 | 321869.3 | 738186.2 | 1166189  |
| 462.3776 | 29.63717 | 29.59167 | 29.70967 | 5  | 2 | 3 | 192972.9 | 785459.1 | 791221.4 |
| 496.4841 | 37.43358 | 37.40167 | 37.6065  | 10 | 5 | 5 | 1928272  | 16529007 | 9264770  |
| 274.6372 | 9.212325 | 9.135433 | 9.236417 | 6  | 4 | 2 | 1695225  | 1444339  | 1524397  |
| 659.288  | 41.19333 | 41.16333 | 41.23617 | 10 | 5 | 5 | 1128994  | 6337218  | 4828571  |
| 540.408  | 12.14353 | 12.14225 | 12.18558 | 3  | 0 | 3 | 44952.9  | 58871.41 | 72729.71 |
| 203.5584 | 9.51595  | 9.49235  | 9.537367 | 4  | 1 | 3 | 9250196  | 8874436  | 9833627  |
| 282.2797 | 13.54925 | 13.51812 | 13.55272 | 5  | 2 | 3 | 49772.85 | 120334.2 | 154706.4 |
| 378.6562 | 9.47815  | 9.416233 | 9.537367 | 3  | 0 | 3 | 3147961  | 2404772  | 3859954  |
| 603.1461 | 23.89883 | 23.86133 | 23.91067 | 6  | 1 | 5 | 140289.6 | 296826.7 | 653994.9 |
| 391.998  | 16.929   | 16.8745  | 16.94617 | 5  | 1 | 4 | 299539.3 | 179803.3 | 351169.5 |
| 460.9129 | 18.13525 | 18.09117 | 18.155   | 4  | 0 | 4 | 90729.69 | 393693.3 | 570375.7 |

|          |          |          |          |    |   |   |          |          |          |
|----------|----------|----------|----------|----|---|---|----------|----------|----------|
| 420.2383 | 10.37933 | 10.17218 | 10.45178 | 5  | 3 | 2 | 989244.4 | 1070883  | 1170563  |
| 471.6516 | 10.38173 | 10.22325 | 10.40528 | 4  | 1 | 3 | 378965   | 324680.4 | 478451.3 |
| 376.9156 | 17.44658 | 17.35267 | 17.5305  | 4  | 1 | 3 | 68269.06 | 173018.4 | 276491.6 |
| 637.4549 | 43.30792 | 43.29333 | 43.33733 | 10 | 5 | 5 | 246491.2 | 2651070  | 667754.9 |
| 621.4874 | 16.53952 | 16.47292 | 16.58867 | 10 | 5 | 5 | 411712.3 | 1758110  | 1485743  |
| 566.4286 | 10.11443 | 9.819583 | 10.1429  | 9  | 5 | 3 | 11108357 | 16512099 | 20827736 |
| 369.4817 | 9.49235  | 9.444983 | 9.64025  | 5  | 1 | 3 | 3253661  | 1476864  | 3114561  |
| 540.4189 | 34.56633 | 34.51967 | 34.5725  | 8  | 4 | 4 | 526425.4 | 690542.5 | 788494.2 |
| 373.0986 | 37.41033 | 37.38683 | 37.43067 | 5  | 2 | 3 | 33485.17 | 196303.2 | 133548.6 |
| 554.166  | 10.69564 | 10.59208 | 10.76105 | 4  | 1 | 3 | 296048.3 | 466760.1 | 649423.7 |
| 564.1645 | 21.68167 | 21.64967 | 21.7275  | 5  | 2 | 3 | 70477.34 | 51281.26 | 64448.43 |
| 395.0793 | 19.40083 | 19.29933 | 19.53217 | 6  | 2 | 3 | 370367.1 | 558876   | 831224.1 |
| 610.8428 | 9.541492 | 9.506667 | 9.6125   | 4  | 1 | 3 | 4974211  | 2762278  | 5802740  |
| 630.4442 | 10.84934 | 10.7482  | 10.9188  | 10 | 5 | 5 | 1449569  | 1862200  | 2469446  |
| 229.163  | 10.40063 | 10.37933 | 10.45412 | 6  | 3 | 3 | 350085.6 | 1025631  | 1112256  |
| 310.2439 | 16.54567 | 16.5303  | 16.58867 | 5  | 1 | 4 | 143284.1 | 606437.7 | 571433.2 |
| 478.179  | 9.463983 | 9.416233 | 9.537367 | 3  | 0 | 3 | 4195552  | 1713756  | 3634838  |
| 1052.227 | 9.551242 | 9.500283 | 9.584433 | 4  | 3 | 1 | 4842742  | 2180576  | 2621958  |
| 239.128  | 12.3485  | 12.28567 | 12.48778 | 5  | 2 | 3 | 1666489  | 3738637  | 2717817  |
| 379.0899 | 9.531333 | 9.47815  | 9.537367 | 3  | 0 | 3 | 3048943  | 1157394  | 2370444  |
| 451.3634 | 34.70933 | 34.68767 | 34.72933 | 10 | 5 | 5 | 2927967  | 5048688  | 5633730  |
| 245.084  | 25.68433 | 25.63817 | 25.69883 | 8  | 3 | 5 | 341405.1 | 746849.2 | 1289918  |
| 600.118  | 24.34275 | 24.2525  | 24.35717 | 6  | 2 | 4 | 112717.8 | 192639.5 | 350043.8 |
| 708.5412 | 9.537367 | 9.463983 | 9.545617 | 3  | 0 | 3 | 31226942 | 10874820 | 13652782 |
| 387.1058 | 22.75058 | 22.73267 | 22.79867 | 6  | 1 | 5 | 155054.8 | 261637.6 | 350778.7 |
| 568.4503 | 40.229   | 40.1915  | 40.30817 | 4  | 1 | 3 | 88234.26 | 70462.87 | 37653.16 |
| 395.2697 | 14.405   | 14.39035 | 14.50623 | 5  | 3 | 2 | 130177.5 | 415747.8 | 304646   |
| 227.6778 | 9.537367 | 9.5025   | 9.572217 | 7  | 4 | 3 | 2872272  | 7846029  | 8256412  |
| 481.305  | 9.218233 | 9.08515  | 9.266617 | 6  | 4 | 2 | 78155256 | 53164527 | 88398016 |
| 227.1805 | 10.41965 | 10.37933 | 10.45412 | 7  | 3 | 4 | 4037273  | 14920438 | 18736286 |
| 840.3765 | 10.72183 | 10.70707 | 10.78962 | 3  | 0 | 3 | 346701.2 | 637275.6 | 1156111  |
| 716.4411 | 9.7556   | 9.6898   | 9.948533 | 6  | 2 | 3 | 1657294  | 870472.6 | 1426952  |
| 429.0259 | 15.89132 | 15.83598 | 15.9229  | 5  | 2 | 3 | 418355   | 177391.6 | 338576.2 |
| 458.2999 | 29.63683 | 29.56383 | 29.65133 | 4  | 3 | 1 | 43794.9  | 170028.2 | 108167.9 |
| 695.3599 | 41.209   | 41.1485  | 41.25083 | 7  | 4 | 3 | 94088.69 | 385709.7 | 344272.6 |
| 488.1234 | 41.7035  | 41.6285  | 41.7295  | 9  | 5 | 4 | 33414.47 | 261654.7 | 99313.76 |
| 594.273  | 9.236417 | 9.101033 | 9.2529   | 7  | 4 | 2 | 3345234  | 3301810  | 2179323  |
| 596.3358 | 30.45767 | 30.4265  | 30.53333 | 6  | 3 | 3 | 92386.3  | 427281.3 | 298197.9 |
| 621.3731 | 7.114742 | 6.846833 | 7.210433 | 6  | 1 | 3 | 178900.5 | 200800.9 | 270704.8 |
| 891.4212 | 10.38515 | 10.366   | 10.39378 | 4  | 0 | 4 | 590654.6 | 549116.9 | 923966.1 |
| 375.593  | 9.514858 | 9.460417 | 9.545617 | 4  | 1 | 3 | 4041767  | 3475039  | 6655587  |
| 675.2626 | 41.20775 | 41.16333 | 41.25083 | 10 | 5 | 5 | 149023.7 | 688734.8 | 618752.4 |
| 422.9867 | 18.14992 | 18.0455  | 18.16983 | 6  | 2 | 4 | 903878.6 | 2677446  | 3627163  |
| 772.222  | 32.741   | 32.693   | 32.84617 | 5  | 1 | 4 | 94164.69 | 185609.7 | 403933.7 |
| 547.9945 | 18.6225  | 18.59617 | 18.6355  | 5  | 2 | 3 | 390477.8 | 957748.2 | 1667639  |
| 225.0324 | 20.44525 | 20.411   | 20.464   | 6  | 2 | 4 | 302584.5 | 635598.6 | 871200.9 |
| 718.1957 | 29.13992 | 29.1255  | 29.163   | 4  | 1 | 3 | 66802.79 | 154037.9 | 253795.1 |

|          |          |          |          |    |   |   |          |          |          |
|----------|----------|----------|----------|----|---|---|----------|----------|----------|
| 566.2781 | 9.199533 | 9.08515  | 9.236417 | 5  | 3 | 2 | 1276842  | 1737536  | 721750.3 |
| 786.0956 | 26.26767 | 26.2395  | 26.36    | 4  | 1 | 3 | 35483.81 | 64122.11 | 89303.21 |
| 401.0119 | 10.4029  | 10.37933 | 10.45238 | 4  | 1 | 3 | 606330.6 | 1065082  | 576136.4 |
| 759.5481 | 34.13283 | 34.12717 | 34.162   | 5  | 2 | 3 | 146784.6 | 310159.9 | 359486.6 |
| 452.8002 | 9.4622   | 9.184033 | 9.537367 | 6  | 3 | 3 | 27478704 | 11086559 | 21697379 |
| 998.7139 | 33.728   | 33.69983 | 33.78267 | 5  | 2 | 3 | 93289.29 | 79813.7  | 118295.1 |
| 335.2963 | 38.824   | 38.78717 | 38.82417 | 3  | 0 | 3 | 32713464 | 52006.31 | 18687.46 |
| 183.1575 | 10.39333 | 10.36242 | 10.43838 | 6  | 3 | 3 | 287000.6 | 681498.5 | 685253.3 |
| 698.5278 | 9.208    | 9.116917 | 9.266783 | 9  | 5 | 4 | 32267210 | 13633242 | 11787814 |
| 599.115  | 24.34283 | 24.238   | 24.35717 | 7  | 2 | 5 | 361514.8 | 847978.6 | 1503802  |
| 973.4492 | 10.70953 | 10.67897 | 10.72217 | 4  | 1 | 3 | 1667699  | 1713383  | 3279646  |
| 547.3485 | 11.64327 | 11.63278 | 11.65528 | 3  | 0 | 3 | 71479.19 | 64077.97 | 87140.18 |
| 631.9526 | 38.32842 | 38.30067 | 38.41733 | 4  | 1 | 3 | 35147.98 | 108376.9 | 93680.63 |
| 434.2747 | 44.69533 | 44.64133 | 44.78567 | 4  | 3 | 1 | 49229.59 | 433778.9 | 83943.72 |
| 622.4443 | 29.92408 | 29.875   | 29.9365  | 10 | 5 | 5 | 179025   | 1309603  | 241024.6 |
| 389.7191 | 9.5667   | 9.529583 | 9.584433 | 6  | 4 | 2 | 5493325  | 6877456  | 8940740  |
| 314.7226 | 10.86485 | 10.80383 | 10.93685 | 9  | 4 | 5 | 1416855  | 2052538  | 2912541  |
| 658.9663 | 43.18975 | 43.17117 | 43.21833 | 10 | 5 | 5 | 250621.6 | 2918391  | 816621.6 |
| 781.4434 | 9.523983 | 9.506667 | 9.577883 | 3  | 0 | 3 | 6475157  | 7333980  | 9230412  |
| 348.7732 | 9.059967 | 8.9037   | 9.10085  | 6  | 5 | 1 | 1745911  | 3213285  | 2386407  |
| 358.4739 | 9.475958 | 9.460417 | 9.537367 | 4  | 1 | 3 | 11310082 | 10859703 | 21183051 |
| 696.5395 | 9.051367 | 8.9037   | 9.10085  | 5  | 4 | 1 | 1525328  | 2014202  | 2028998  |
| 340.7623 | 9.546583 | 9.473767 | 9.596683 | 8  | 5 | 3 | 3.68E+08 | 1.06E+09 | 1.38E+09 |
| 519.0613 | 32.43642 | 32.37967 | 32.527   | 4  | 1 | 3 | 303998.4 | 459275.6 | 820980.7 |
| 557.2164 | 28.40133 | 28.3145  | 28.49317 | 7  | 3 | 4 | 205395.5 | 485820.4 | 696281   |
| 340.6161 | 9.537367 | 9.463983 | 9.584433 | 5  | 2 | 3 | 73905976 | 45641202 | 60773236 |
| 539.1622 | 10.69325 | 10.5386  | 10.76465 | 7  | 1 | 5 | 1324896  | 1754025  | 3276406  |
| 533.3444 | 29.72733 | 29.71    | 29.755   | 5  | 2 | 3 | 55395.24 | 193804.6 | 145718.1 |
| 367.3236 | 9.5169   | 9.47815  | 9.537367 | 3  | 0 | 3 | 32806072 | 18411132 | 33287771 |
| 495.3895 | 34.6415  | 34.5835  | 34.65967 | 10 | 5 | 5 | 2492678  | 4241579  | 4825337  |
| 434.9128 | 15.89132 | 15.85152 | 15.9229  | 5  | 1 | 4 | 100627.4 | 355392   | 626993.2 |
| 475.916  | 22.136   | 22.10867 | 22.24517 | 4  | 1 | 3 | 65848.96 | 194877.9 | 315013.6 |
| 575.2634 | 29.12592 | 29.08283 | 29.2115  | 8  | 3 | 5 | 290137.7 | 1255824  | 1572266  |
| 986.6642 | 32.39467 | 32.342   | 32.42733 | 5  | 1 | 3 | 92482.14 | 510387.2 | 380002.3 |
| 331.2121 | 38.72092 | 38.6875  | 38.72133 | 4  | 1 | 3 | 30329.26 | 156695.2 | 96315.97 |
| 664.4561 | 9.416233 | 9.186383 | 9.463983 | 3  | 0 | 3 | 3.41E+08 | 1180646  | 1643032  |
| 477.8412 | 33.79433 | 33.74017 | 33.8055  | 4  | 1 | 3 | 367017.7 | 599984.4 | 702970.8 |
| 658.4748 | 34.76183 | 34.72033 | 34.78367 | 9  | 5 | 4 | 721358.2 | 1585026  | 564613   |
| 369.164  | 13.47472 | 13.4494  | 13.52492 | 5  | 2 | 3 | 95314.29 | 165028.4 | 91532.17 |
| 375.4678 | 9.490225 | 9.460417 | 9.537367 | 4  | 1 | 3 | 3745742  | 5266854  | 8119580  |
| 541.3292 | 32.11592 | 32.08683 | 32.17667 | 4  | 3 | 1 | 391792.9 | 937879.8 | 1753063  |
| 326.163  | 38.193   | 38.12733 | 38.21533 | 3  | 0 | 3 | 27019.58 | 52555.99 | 29725.34 |
| 493.3835 | 14.0943  | 14.08735 | 14.1612  | 3  | 0 | 3 | 68431.7  | 286265.5 | 291304.1 |
| 620.484  | 17.20708 | 17.17867 | 17.25317 | 10 | 5 | 5 | 4245543  | 20245591 | 16187437 |
| 458.0568 | 32.146   | 32.10267 | 32.21717 | 5  | 2 | 3 | 32239.48 | 64855.43 | 64004.57 |
| 450.1091 | 26.44417 | 26.44317 | 26.45817 | 4  | 1 | 3 | 41163.39 | 43816.26 | 59053.37 |
| 343.2963 | 20.14092 | 20.103   | 20.31433 | 10 | 5 | 5 | 347393.8 | 1226045  | 990302.1 |

|          |          |          |          |    |   |   |          |          |          |
|----------|----------|----------|----------|----|---|---|----------|----------|----------|
| 298.0824 | 31.578   | 31.49983 | 31.61533 | 8  | 5 | 3 | 57238.89 | 258978   | 173123   |
| 411.9995 | 21.78433 | 21.73733 | 21.79333 | 3  | 0 | 3 | 55140.56 | 99443.69 | 129665.1 |
| 697.5436 | 7.272717 | 7.207417 | 7.307117 | 4  | 1 | 3 | 233396.6 | 69691.59 | 127925.6 |
| 372.2386 | 12.62077 | 12.53962 | 12.80027 | 8  | 3 | 5 | 65627.33 | 285339.7 | 145861.4 |
| 343.1887 | 16.41836 | 16.39732 | 16.46763 | 10 | 5 | 5 | 492635.3 | 1075317  | 855406.2 |
| 268.1757 | 27.14608 | 27.08717 | 27.2075  | 10 | 5 | 5 | 784367.8 | 3106411  | 3576848  |
| 498.8561 | 33.739   | 33.6945  | 33.78267 | 8  | 3 | 5 | 258778.6 | 958495.8 | 1085319  |
| 328.2853 | 13.78332 | 13.76062 | 13.88168 | 10 | 5 | 5 | 211317.2 | 821662.3 | 1009284  |
| 282.0791 | 15.32177 | 15.29043 | 15.37997 | 5  | 1 | 4 | 77541.87 | 248268.4 | 321458.2 |
| 406.2957 | 12.62075 | 12.5832  | 12.66212 | 6  | 2 | 4 | 98491.16 | 166772.3 | 234826.4 |
| 562.3702 | 25.02683 | 24.9975  | 25.053   | 7  | 4 | 3 | 118135.2 | 226130.3 | 256368.4 |
| 348.3461 | 9.47815  | 9.460417 | 9.537367 | 5  | 2 | 3 | 15144683 | 15073806 | 23465621 |
| 290.1062 | 10.66333 | 10.60657 | 10.74052 | 4  | 1 | 3 | 882546.9 | 683514.5 | 979691   |
| 256.1628 | 18.83667 | 18.80483 | 18.87783 | 5  | 3 | 2 | 385793.6 | 584343.1 | 909907.4 |
| 524.3711 | 34.956   | 34.91917 | 34.973   | 4  | 4 | 0 | 73701.15 | 475685.4 | 340628   |
| 376.2917 | 9.475958 | 9.460417 | 9.537367 | 4  | 1 | 3 | 11184688 | 10679528 | 21358331 |
| 339.2323 | 32.012   | 31.92633 | 32.0445  | 5  | 2 | 3 | 230425.6 | 405222.3 | 343294.2 |
| 342.1497 | 22.09733 | 22.005   | 22.12217 | 8  | 3 | 5 | 899616.3 | 1723143  | 2275101  |
| 309.2623 | 13.3869  | 13.36052 | 13.44572 | 8  | 3 | 5 | 380077.8 | 1452239  | 1851047  |
| 228.1599 | 9.671033 | 9.61695  | 9.751083 | 5  | 4 | 1 | 3084372  | 8221309  | 5472746  |
| 491.3252 | 9.340625 | 9.1639   | 9.460417 | 6  | 3 | 3 | 2462467  | 2178204  | 2227406  |
| 411.3196 | 39.52558 | 39.5005  | 39.60933 | 4  | 1 | 3 | 128214.2 | 292300.8 | 55876.59 |
| 439.0263 | 25.705   | 25.66867 | 25.70833 | 3  | 3 | 0 | 41776.84 | 93339.41 | 134509.9 |
| 407.3371 | 34.7655  | 34.73383 | 34.78    | 10 | 5 | 5 | 2629601  | 5323799  | 5976455  |
| 668.1595 | 26.23142 | 26.173   | 26.31783 | 8  | 3 | 5 | 329770.2 | 931135.3 | 1284714  |
| 734.197  | 32.10017 | 32.01533 | 32.19133 | 7  | 5 | 2 | 98139.44 | 639679.6 | 596985.2 |
| 359.3423 | 9.469283 | 9.43065  | 9.537367 | 4  | 1 | 3 | 4112276  | 4057681  | 6317872  |
| 320.2881 | 34.76183 | 34.72233 | 34.792   | 9  | 4 | 5 | 246323.6 | 943296.8 | 1056222  |
| 454.06   | 25.689   | 25.65733 | 25.69883 | 5  | 1 | 4 | 59224.89 | 98658.72 | 195414   |
| 499.1774 | 23.708   | 23.6545  | 23.76133 | 3  | 3 | 0 | 108880.8 | 226927.1 | 392528.6 |
| 554.4652 | 10.39209 | 10.335   | 10.40915 | 6  | 3 | 3 | 631381.2 | 667227.9 | 1021722  |
| 315.3092 | 29.96983 | 29.93583 | 30.01183 | 10 | 5 | 5 | 118189.8 | 512932.3 | 289893.3 |
| 218.0194 | 21.67625 | 21.54233 | 21.71283 | 4  | 1 | 3 | 33531.02 | 66670.3  | 61793.82 |
| 385.3827 | 23.26833 | 23.17983 | 23.31333 | 5  | 3 | 2 | 666728.9 | 616120.1 | 395370.8 |
| 232.0503 | 21.68025 | 21.57183 | 21.71283 | 8  | 2 | 4 | 81883.94 | 205394.1 | 111504.9 |
| 350.2048 | 25.405   | 25.402   | 25.44767 | 4  | 0 | 4 | 115916   | 276849.3 | 133864.5 |
| 1131.424 | 9.463983 | 9.43065  | 9.537367 | 5  | 2 | 3 | 25188752 | 11164442 | 22169534 |
| 452.4116 | 9.2076   | 9.08515  | 9.280533 | 3  | 3 | 0 | 5256000  | 6443022  | 8013956  |
| 468.2248 | 11.51077 | 11.50172 | 11.55333 | 5  | 2 | 3 | 869232.3 | 1703645  | 3435481  |
| 423.7822 | 19.78192 | 19.75333 | 19.8525  | 8  | 3 | 5 | 146176.3 | 546416.9 | 792962.9 |
| 316.6139 | 9.541492 | 9.52075  | 9.6125   | 4  | 1 | 3 | 1456479  | 1351307  | 2954350  |
| 431.116  | 11.28363 | 11.27452 | 11.30973 | 6  | 2 | 4 | 2567421  | 4430327  | 9458385  |
| 638.2822 | 22.15367 | 22.06867 | 22.1655  | 6  | 2 | 4 | 476526.8 | 1294769  | 1719060  |
| 485.2174 | 10.40915 | 10.34782 | 10.48317 | 7  | 3 | 4 | 1337678  | 3225633  | 3761706  |
| 535.0716 | 17.01583 | 16.76583 | 17.08467 | 7  | 2 | 4 | 326867.7 | 416875.7 | 858330.2 |
| 316.2853 | 29.68083 | 29.492   | 29.712   | 7  | 4 | 3 | 121213.3 | 713940.4 | 685616.5 |
| 203.7227 | 9.51595  | 9.49235  | 9.537367 | 4  | 1 | 3 | 11048391 | 10541549 | 12043764 |

|          |          |          |          |    |   |   |          |          |          |
|----------|----------|----------|----------|----|---|---|----------|----------|----------|
| 439.2623 | 23.282   | 23.25383 | 23.3685  | 7  | 2 | 5 | 116823.8 | 260281.1 | 423405.1 |
| 417.9212 | 8.894167 | 8.695117 | 8.94765  | 7  | 5 | 2 | 215732   | 331176.2 | 245928.3 |
| 381.2908 | 10.08522 | 10.0679  | 10.12338 | 5  | 2 | 3 | 1496934  | 2871623  | 4517426  |
| 402.0691 | 10.38859 | 10.34715 | 10.49363 | 4  | 1 | 3 | 497392.5 | 675848.7 | 373099   |
| 643.4833 | 37.5525  | 37.51017 | 37.64467 | 7  | 3 | 4 | 88112.22 | 388519   | 421733.9 |
| 658.9482 | 18.14683 | 18.10567 | 18.16983 | 3  | 0 | 3 | 79360.2  | 183903.1 | 339212.5 |
| 583.477  | 43.09683 | 43.05483 | 43.21833 | 8  | 4 | 4 | 53846.25 | 267910.2 | 34054.91 |
| 378.3218 | 41.6255  | 41.58467 | 41.6585  | 7  | 3 | 4 | 50707.75 | 179431.6 | 210271.5 |
| 365.8496 | 9.47815  | 9.444983 | 9.537367 | 3  | 0 | 3 | 2871940  | 1537524  | 3145019  |
| 327.3008 | 23.4715  | 23.42917 | 23.55433 | 7  | 2 | 5 | 87500.58 | 238474.3 | 441588.3 |
| 339.1932 | 25.85433 | 25.8365  | 25.89617 | 3  | 3 | 0 | 171114.9 | 368856.9 | 662625.2 |
| 542.1608 | 10.69548 | 10.58085 | 10.77118 | 6  | 1 | 4 | 6840150  | 10374377 | 20038112 |
| 291.1813 | 28.14717 | 28.02967 | 28.22367 | 7  | 3 | 4 | 426270.8 | 1394331  | 1787583  |
| 338.9468 | 9.577667 | 9.416233 | 9.677167 | 5  | 1 | 3 | 1969901  | 1090940  | 1359421  |
| 390.173  | 31.18333 | 31.17333 | 31.19267 | 4  | 0 | 4 | 59411.05 | 260229.9 | 96006.54 |
| 702.5371 | 36.06033 | 36.0345  | 36.11267 | 6  | 3 | 3 | 463084.3 | 3147757  | 2947401  |
| 705.9897 | 33.17183 | 33.125   | 33.2025  | 3  | 0 | 3 | 56881.57 | 106592.9 | 115529   |
| 729.2007 | 9.490442 | 9.460417 | 9.537367 | 4  | 1 | 3 | 16323820 | 7567823  | 16176468 |
| 307.1314 | 25.68033 | 25.64683 | 25.69883 | 8  | 3 | 5 | 297682.4 | 707831.2 | 1385585  |
| 354.0766 | 21.44175 | 21.3015  | 21.4785  | 8  | 4 | 4 | 193635.5 | 177218.3 | 203233   |
| 341.2638 | 9.546583 | 9.47815  | 9.596683 | 8  | 5 | 3 | 79542464 | 2.3E+08  | 3.03E+08 |
| 332.1652 | 21.69342 | 21.57183 | 21.7275  | 6  | 2 | 4 | 179768.8 | 410579.2 | 292966.3 |
| 554.2727 | 9.217975 | 9.101033 | 9.254883 | 8  | 5 | 3 | 17934818 | 16799466 | 23011717 |
| 306.2641 | 35.07433 | 34.99633 | 35.147   | 5  | 2 | 3 | 38236.72 | 157765.4 | 76681.64 |
| 332.7974 | 9.47815  | 9.473767 | 9.537367 | 5  | 2 | 3 | 11464046 | 14032169 | 21414485 |
| 212.2516 | 9.522017 | 9.460417 | 9.545617 | 4  | 1 | 3 | 5898831  | 6532425  | 13152764 |
| 301.2376 | 37.69383 | 37.65333 | 37.72433 | 6  | 3 | 3 | 428797.2 | 478003.8 | 151944.6 |
| 333.1    | 17.01717 | 16.9865  | 17.05383 | 5  | 1 | 4 | 185931.8 | 337248.9 | 674103.7 |
| 457.2153 | 23.88067 | 23.77683 | 23.88533 | 7  | 2 | 5 | 755171.9 | 1861516  | 3272283  |
| 413.2368 | 27.20067 | 27.11533 | 27.3695  | 11 | 5 | 5 | 286117.7 | 378814.3 | 328385.8 |
| 329.3166 | 23.48042 | 23.4305  | 23.53733 | 4  | 1 | 3 | 55891.3  | 101555.4 | 215160.6 |
| 336.0535 | 21.44    | 21.31517 | 21.4785  | 5  | 1 | 4 | 68753.44 | 196849.3 | 265427.2 |
| 791.6203 | 44.97317 | 44.85567 | 44.97533 | 5  | 4 | 1 | 30628.51 | 80491.47 | 18170.15 |
| 276.9893 | 9.51595  | 9.47815  | 9.537367 | 4  | 1 | 3 | 5090838  | 3082713  | 3919621  |
| 447.3112 | 30.14117 | 30.0755  | 30.26133 | 6  | 3 | 3 | 82182.95 | 347908   | 331533.6 |
| 367.2037 | 39.19333 | 39.13083 | 39.20833 | 3  | 0 | 3 | 63051.36 | 184454.9 | 62097.92 |
| 503.1898 | 10.40805 | 10.37933 | 10.44485 | 5  | 1 | 4 | 2328529  | 3442616  | 5222507  |
| 730.7899 | 9.4622   | 9.43065  | 9.537367 | 4  | 1 | 3 | 3693813  | 2085546  | 3962889  |
| 277.0562 | 15.86077 | 15.83023 | 15.89552 | 7  | 2 | 5 | 802414.4 | 1905103  | 3153580  |
| 360.1934 | 9.504742 | 9.460417 | 9.537367 | 4  | 1 | 3 | 5418009  | 5726606  | 6898354  |
| 374.2754 | 19.15833 | 19.12233 | 19.2145  | 9  | 4 | 5 | 403961.4 | 972177.7 | 1288675  |
| 285.7429 | 8.6286   | 8.332483 | 8.636933 | 5  | 3 | 2 | 382177.9 | 933155.5 | 1267251  |
| 337.3144 | 34.75783 | 34.72233 | 34.78    | 9  | 4 | 5 | 272861.8 | 923392.5 | 1024467  |
| 602.2187 | 28.39517 | 28.35217 | 28.48133 | 5  | 2 | 3 | 58736.43 | 104871   | 136791   |
| 359.0905 | 22.76842 | 22.74667 | 22.80117 | 4  | 1 | 3 | 54687.55 | 61492.35 | 79556.65 |
| 322.0376 | 12.88377 | 12.64055 | 12.94688 | 6  | 1 | 3 | 51815.31 | 142405.5 | 270053.1 |
| 344.3165 | 32.09525 | 32.05867 | 32.1175  | 10 | 5 | 5 | 289396.3 | 1091126  | 1068680  |



|          |          |          |          |    |   |   |          |          |          |
|----------|----------|----------|----------|----|---|---|----------|----------|----------|
| 310.1301 | 25.67708 | 25.64683 | 25.69883 | 8  | 3 | 5 | 1001973  | 2053638  | 3929969  |
| 458.2192 | 23.87825 | 23.84617 | 23.89933 | 6  | 1 | 5 | 160029.3 | 347481.6 | 615931.4 |
| 807.4701 | 9.897642 | 9.891217 | 9.932383 | 4  | 1 | 3 | 204164.4 | 160002.9 | 216847.4 |
| 320.2225 | 24.0625  | 23.9955  | 24.077   | 5  | 2 | 3 | 639536.8 | 350932   | 130699.5 |
| 457.0573 | 25.6825  | 25.64683 | 25.71367 | 7  | 2 | 5 | 171936.6 | 419246.6 | 831896   |
| 395.1282 | 18.93883 | 18.90983 | 18.95317 | 9  | 4 | 5 | 102360   | 420989.5 | 428099   |
| 834.3537 | 10.66922 | 10.63728 | 10.77118 | 7  | 3 | 4 | 1486345  | 1525289  | 1772313  |
| 721.4482 | 22.58917 | 22.57133 | 22.60567 | 4  | 1 | 3 | 52949.09 | 60877.81 | 106659   |
| 1006.402 | 9.531333 | 9.44975  | 9.64025  | 5  | 1 | 3 | 10283960 | 2895809  | 6274599  |
| 515.3199 | 23.10367 | 23.05067 | 23.196   | 3  | 3 | 0 | 37220.98 | 126273.5 | 100134   |
| 314.221  | 10.86477 | 10.80383 | 10.95503 | 9  | 4 | 5 | 4436113  | 6899103  | 9867276  |
| 755.5261 | 29.81942 | 29.79967 | 29.84117 | 6  | 2 | 4 | 32058.28 | 183291.6 | 43350.49 |
| 902.4602 | 41.208   | 41.20783 | 41.25083 | 5  | 3 | 2 | 55025.91 | 241258.2 | 239105.1 |
| 698.3304 | 43.60183 | 43.54783 | 43.6195  | 6  | 1 | 5 | 68478.8  | 166603.2 | 187019.5 |
| 492.3802 | 14.10532 | 14.03807 | 14.19172 | 8  | 4 | 4 | 243634.9 | 1227898  | 1196939  |
| 792.6    | 10.5964  | 10.4685  | 10.6408  | 8  | 5 | 3 | 1494452  | 1678448  | 1761155  |
| 790.4513 | 9.534967 | 9.257833 | 9.537367 | 3  | 0 | 3 | 1183552  | 1539923  | 1476441  |
| 351.0894 | 30.78442 | 30.74683 | 30.84933 | 4  | 1 | 3 | 100349.6 | 407971.7 | 243078.8 |
| 620.484  | 16.53952 | 16.47292 | 16.58867 | 10 | 5 | 5 | 2513296  | 12060944 | 9607037  |
| 553.2096 | 24.165   | 24.16483 | 24.19517 | 3  | 0 | 3 | 230631   | 918574.6 | 1000243  |
| 270.3157 | 32.58817 | 32.54567 | 32.61267 | 9  | 5 | 4 | 50159.32 | 456786.9 | 92045.49 |
| 291.2297 | 29.71692 | 29.57867 | 29.7875  | 8  | 4 | 4 | 146891.9 | 801671.3 | 918272.2 |
| 278.8071 | 30.76233 | 30.74683 | 30.79183 | 3  | 0 | 3 | 65012.6  | 156734   | 170723.7 |
| 266.1731 | 13.00762 | 12.9761  | 13.06513 | 9  | 5 | 4 | 867909.1 | 3124273  | 4298170  |
| 419.127  | 28.64333 | 28.58283 | 28.65833 | 5  | 2 | 3 | 51597.08 | 95666.71 | 120807.7 |
| 486.1263 | 41.70083 | 41.65733 | 41.7295  | 10 | 5 | 5 | 218441.8 | 2493105  | 367202   |
| 516.3692 | 39.3475  | 39.298   | 39.37317 | 9  | 4 | 5 | 230085.1 | 516806.1 | 377410.9 |
| 503.171  | 10.6978  | 10.61352 | 10.77118 | 4  | 3 | 1 | 480586.1 | 1288626  | 2194072  |
| 477.1214 | 11.28918 | 11.24107 | 11.29943 | 7  | 3 | 4 | 6847650  | 13245933 | 28547224 |
| 272.186  | 25.22183 | 25.156   | 25.227   | 5  | 2 | 3 | 237211.1 | 843686   | 1102917  |
| 201.0083 | 2.231583 | 2.004783 | 2.440967 | 11 | 5 | 5 | 359439.7 | 3991886  | 1617706  |
| 348.363  | 9.489217 | 9.473767 | 9.537367 | 4  | 1 | 3 | 17410656 | 18061881 | 28157965 |
| 294.207  | 11.51052 | 11.4717  | 11.73068 | 7  | 3 | 4 | 109753.4 | 509402.5 | 501848.9 |
| 339.0533 | 12.9152  | 12.83015 | 13.10903 | 7  | 2 | 5 | 4316565  | 3227837  | 5383857  |
| 212.4719 | 9.483542 | 9.444983 | 9.537367 | 4  | 1 | 3 | 2605026  | 2692050  | 5527779  |
| 226.1804 | 20.53067 | 20.4835  | 20.538   | 5  | 2 | 3 | 105949.4 | 406377.8 | 580751.1 |
| 220.1781 | 10.09795 | 10.07062 | 10.13852 | 5  | 2 | 3 | 108040.3 | 171553.8 | 247403.9 |
| 574.3376 | 30.284   | 30.24533 | 30.50117 | 5  | 3 | 1 | 1104393  | 2133679  | 4188900  |
| 430.0256 | 25.69217 | 25.63267 | 25.7215  | 5  | 3 | 2 | 31429.08 | 186548.1 | 108786.3 |
| 582.2286 | 29.48392 | 29.45417 | 29.57867 | 6  | 2 | 4 | 116687.5 | 183061.2 | 240732.9 |
| 520.0361 | 26.97558 | 26.927   | 26.99883 | 6  | 2 | 4 | 57705.22 | 156693.4 | 211830.3 |
| 587.3183 | 11.47827 | 11.44367 | 11.52992 | 5  | 2 | 3 | 110581.1 | 101756.5 | 108839.5 |
| 289.2129 | 25.9355  | 25.88233 | 25.976   | 5  | 3 | 2 | 50391.29 | 120106.6 | 88288.1  |
| 541.8302 | 32.14658 | 32.117   | 32.439   | 4  | 3 | 1 | 225794.2 | 514974.6 | 986928.5 |
| 693.795  | 34.31167 | 34.27767 | 34.31933 | 5  | 2 | 3 | 63214.08 | 63297.49 | 77963.83 |
| 390.1368 | 22.4205  | 22.35967 | 22.459   | 7  | 2 | 5 | 321649.5 | 988201.9 | 1330184  |
| 301.1466 | 28.22883 | 28.191   | 28.23633 | 6  | 2 | 4 | 97214.85 | 257923.2 | 372065.4 |

|          |          |          |          |    |   |   |          |          |          |
|----------|----------|----------|----------|----|---|---|----------|----------|----------|
| 173.0963 | 16.86433 | 16.77733 | 16.89817 | 6  | 3 | 3 | 95504.5  | 404891.4 | 209081.4 |
| 353.2087 | 30.25    | 30.24433 | 30.2755  | 3  | 3 | 0 | 34723.16 | 125526.7 | 119148.2 |
| 1141.561 | 10.66402 | 10.6063  | 10.66922 | 7  | 3 | 4 | 3056310  | 4830991  | 8736259  |
| 408.3403 | 34.764   | 34.73667 | 34.792   | 9  | 4 | 5 | 587877.6 | 1004243  | 1059378  |
| 485.1326 | 41.70083 | 41.64883 | 41.7455  | 10 | 5 | 5 | 76471.6  | 849335.3 | 153217.6 |
| 614.9403 | 43.45583 | 43.4175  | 43.48533 | 10 | 5 | 5 | 503320.6 | 5170070  | 1370516  |
| 1578.101 | 9.537367 | 9.49235  | 9.545617 | 3  | 0 | 3 | 2452720  | 2563824  | 5351344  |
| 524.4243 | 40.36033 | 40.34183 | 40.47117 | 3  | 0 | 3 | 68358.38 | 105357.2 | 88179.13 |
| 561.3668 | 25.04367 | 24.9975  | 25.06317 | 7  | 4 | 3 | 343291.1 | 785179.4 | 921861.4 |
| 373.1311 | 32.88867 | 32.87817 | 32.9635  | 5  | 1 | 4 | 369529.4 | 1233624  | 2036917  |
| 471.3629 | 15.246   | 15.14128 | 15.27635 | 6  | 2 | 4 | 43985.41 | 104502.5 | 119922   |
| 398.5688 | 30.29    | 30.24433 | 30.36167 | 5  | 1 | 4 | 113141.9 | 202843.9 | 446093.3 |
| 234.1145 | 14.77343 | 14.73133 | 14.80373 | 7  | 3 | 4 | 99143.01 | 317314.3 | 405733.8 |
| 867.6365 | 33.9905  | 33.9655  | 34.03883 | 5  | 1 | 4 | 78877.04 | 62711.04 | 75960.72 |
| 659.9226 | 32.13233 | 32.0925  | 32.146   | 4  | 1 | 3 | 55157.55 | 76986.37 | 164394.6 |
| 1749.798 | 9.502483 | 9.47815  | 9.537367 | 3  | 0 | 3 | 23383768 | 24045355 | 49787898 |
| 536.9051 | 44.02875 | 43.96733 | 44.0585  | 10 | 5 | 5 | 109157.5 | 1031009  | 221942.7 |
| 611.7939 | 10.70244 | 10.69325 | 10.70807 | 4  | 1 | 3 | 1161684  | 1258554  | 2365783  |
| 424.8053 | 34.07392 | 33.98017 | 34.09767 | 4  | 1 | 3 | 40772.16 | 120527.9 | 137985.2 |
| 554.1973 | 26.14725 | 26.09583 | 26.205   | 8  | 4 | 4 | 262199.1 | 575615.6 | 735938.5 |
| 427.2458 | 38.09417 | 38.0685  | 38.12717 | 6  | 3 | 3 | 72765.54 | 284678.8 | 301052.4 |
| 379.2385 | 39.43308 | 39.35517 | 39.46667 | 10 | 5 | 5 | 140924.3 | 1636828  | 472965.7 |
| 218.1835 | 21.12033 | 21.04633 | 21.15267 | 3  | 0 | 3 | 48490.05 | 140592.5 | 101786.1 |
| 345.32   | 32.08017 | 32.063   | 32.08817 | 4  | 3 | 1 | 52987.69 | 142228.2 | 199217.1 |
| 317.1054 | 21.13642 | 21.05833 | 21.162   | 10 | 5 | 5 | 4886245  | 16514272 | 22733727 |
| 240.1316 | 12.9034  | 12.83283 | 13.0366  | 7  | 3 | 4 | 1032975  | 733459.2 | 702228.6 |
| 405.2731 | 8.788633 | 8.51555  | 8.881833 | 4  | 3 | 1 | 106356.4 | 181652.7 | 158090.5 |
| 701.9707 | 18.09117 | 18.05967 | 18.14    | 3  | 0 | 3 | 46819.51 | 61439.21 | 98504.19 |
| 1978.143 | 9.5169   | 9.463983 | 9.571    | 5  | 2 | 3 | 68635512 | 56123155 | 85096273 |
| 394.1808 | 9.648633 | 9.55075  | 9.654717 | 3  | 0 | 3 | 3689619  | 4551394  | 8001196  |
| 1581.652 | 9.541492 | 9.49235  | 9.6125   | 4  | 1 | 3 | 3878571  | 3789040  | 8468430  |
| 567.2856 | 9.225483 | 9.173283 | 9.2529   | 4  | 1 | 3 | 3304993  | 2394412  | 3907393  |
| 586.5049 | 38.14325 | 38.115   | 38.36833 | 10 | 5 | 5 | 70959.59 | 522864.4 | 343655.7 |
| 621.4874 | 17.20708 | 17.17867 | 17.2395  | 10 | 5 | 5 | 688463.9 | 3169420  | 2604372  |
| 607.4809 | 11.05533 | 10.9623  | 11.0843  | 7  | 3 | 4 | 190267.2 | 213177.2 | 264314.7 |
| 573.4004 | 33.05775 | 33.03667 | 33.12767 | 4  | 1 | 3 | 1097258  | 3469450  | 4416831  |
| 306.2434 | 9.961883 | 9.924533 | 10.00747 | 4  | 1 | 3 | 546495.6 | 1259663  | 1009038  |
| 411.3419 | 9.968133 | 9.93755  | 10.0025  | 7  | 3 | 4 | 692071.1 | 899636.6 | 1154860  |
| 153.5325 | 25.03692 | 24.96417 | 25.0795  | 4  | 1 | 3 | 175317.7 | 143330.8 | 309263   |
| 295.1876 | 33.52567 | 33.463   | 33.7715  | 5  | 1 | 4 | 96217.66 | 696375.6 | 1149756  |
| 923.6958 | 9.429067 | 9.351383 | 9.44975  | 5  | 1 | 4 | 4074464  | 1695791  | 3111514  |
| 570.3198 | 28.2215  | 28.16133 | 28.264   | 5  | 3 | 2 | 70010.54 | 257057.8 | 200295.5 |
| 595.0078 | 9.511617 | 9.460417 | 9.537367 | 4  | 1 | 3 | 2845660  | 2889184  | 6226929  |
| 649.241  | 32.16142 | 32.0855  | 32.23883 | 4  | 1 | 3 | 178004.2 | 143638.4 | 293689.8 |
| 635.4755 | 11.56863 | 11.52713 | 11.59793 | 6  | 3 | 3 | 69955.37 | 144515.9 | 183239   |
| 980.6744 | 33.66675 | 33.641   | 33.68317 | 4  | 1 | 3 | 42038.38 | 150258.3 | 178888.9 |
| 480.8051 | 9.20005  | 9.101033 | 9.2529   | 7  | 5 | 2 | 1.47E+08 | 1.15E+08 | 1.88E+08 |

|          |          |          |          |    |   |   |          |          |          |
|----------|----------|----------|----------|----|---|---|----------|----------|----------|
| 347.2505 | 20.77025 | 20.687   | 20.84633 | 6  | 2 | 3 | 37003700 | 15862204 | 20714322 |
| 464.3462 | 33.90517 | 33.86183 | 33.93567 | 6  | 2 | 4 | 156843   | 537264   | 234978.9 |
| 350.2985 | 31.73617 | 31.6825  | 31.77883 | 6  | 2 | 4 | 86452.23 | 197366.6 | 219907.2 |
| 690.4999 | 9.460417 | 9.394733 | 9.547767 | 5  | 2 | 3 | 5691304  | 5113679  | 7542363  |
| 298.2077 | 10.87885 | 10.732   | 10.95503 | 10 | 5 | 5 | 1120080  | 1355538  | 2081913  |
| 343.1786 | 10.86473 | 10.80383 | 11.00872 | 7  | 2 | 5 | 668539.7 | 780552.8 | 1219946  |
| 217.1437 | 16.97667 | 16.93267 | 17.0075  | 6  | 3 | 3 | 46450.59 | 260443.2 | 153091.3 |
| 262.1326 | 8.959583 | 8.933233 | 9.022867 | 3  | 0 | 3 | 384555.3 | 278001.7 | 312266.2 |
| 322.8998 | 13.33215 | 13.23695 | 13.3587  | 3  | 0 | 3 | 169934.1 | 455854.9 | 825798.4 |
| 402.3581 | 32.63958 | 32.6175  | 32.68567 | 10 | 5 | 5 | 133308.7 | 1123415  | 165769.7 |
| 892.5447 | 31.07758 | 31.06583 | 31.10817 | 4  | 1 | 3 | 58972.25 | 161564.4 | 146289.4 |
| 387.1618 | 37.00567 | 37.00533 | 37.00783 | 3  | 0 | 3 | 52907.67 | 262651.8 | 138442.8 |
| 347.2628 | 9.489217 | 9.473767 | 9.537367 | 4  | 1 | 3 | 12444496 | 14751063 | 21906852 |
| 384.2584 | 10.39097 | 10.34782 | 10.44485 | 9  | 4 | 5 | 512249.5 | 1252731  | 1674934  |
| 406.2312 | 14.35027 | 14.3004  | 14.37585 | 6  | 2 | 4 | 42316.49 | 172710.4 | 129479.3 |
| 402.0669 | 22.98383 | 22.938   | 23.01033 | 5  | 4 | 1 | 145518.8 | 474784.2 | 688344.1 |
| 746.5276 | 34.37592 | 34.32917 | 34.41517 | 10 | 5 | 5 | 136109.2 | 1887671  | 451282   |
| 295.2386 | 11.13748 | 11.063   | 11.23492 | 7  | 3 | 4 | 160381   | 828601.8 | 858843.7 |
| 473.2102 | 17.193   | 17.16283 | 17.2105  | 5  | 3 | 2 | 185620.2 | 428137.7 | 747640   |
| 310.7457 | 17.22942 | 17.19167 | 17.254   | 6  | 2 | 4 | 115080.8 | 433999.4 | 426249.6 |
| 836.596  | 28.76083 | 28.74433 | 28.778   | 7  | 3 | 4 | 147737.2 | 432174.8 | 531749.6 |
| 371.1357 | 32.44567 | 32.40367 | 32.4975  | 5  | 1 | 4 | 363779   | 1123566  | 1858081  |
| 544.3921 | 11.72454 | 11.68558 | 11.7652  | 6  | 3 | 3 | 337234.2 | 585995.5 | 645064.7 |
| 549.2475 | 28.1615  | 28.07367 | 28.1635  | 3  | 0 | 3 | 81344.7  | 287558.4 | 379416.9 |
| 203.9549 | 9.526183 | 9.49235  | 9.545617 | 4  | 1 | 3 | 8483615  | 8374861  | 9475793  |
| 372.987  | 13.71142 | 13.46225 | 13.76748 | 8  | 1 | 4 | 134253.8 | 358786.3 | 710578   |
| 675.5099 | 21.76617 | 21.63133 | 21.8135  | 5  | 2 | 3 | 94596.78 | 665209.8 | 756101.3 |
| 226.1804 | 25.00125 | 24.9495  | 25.03533 | 8  | 3 | 5 | 220354.9 | 615655.1 | 941603.4 |
| 241.0498 | 27.18625 | 27.17617 | 27.24383 | 4  | 3 | 1 | 461970.3 | 2044592  | 3286478  |
| 461.9004 | 18.1645  | 18.153   | 18.18483 | 3  | 0 | 3 | 70478.58 | 376445.6 | 465892.8 |
| 373.2722 | 19.16675 | 19.12233 | 19.202   | 10 | 5 | 5 | 3584367  | 11684164 | 14086636 |
| 1748.539 | 9.497525 | 9.460417 | 9.537367 | 4  | 1 | 3 | 4397373  | 3279032  | 7073543  |
| 564.2958 | 35.00117 | 34.92267 | 35.01667 | 5  | 2 | 3 | 133806.1 | 606560.4 | 551808.8 |
| 365.2905 | 21.52233 | 21.39833 | 21.5665  | 7  | 3 | 4 | 235479.5 | 1279668  | 1697174  |
| 533.0363 | 22.78625 | 22.77183 | 22.79867 | 4  | 1 | 3 | 60853.71 | 69387.99 | 111731.5 |
| 317.2445 | 12.68802 | 12.6559  | 12.7294  | 5  | 2 | 3 | 53258.99 | 137949.7 | 167789   |
| 293.2478 | 33.635   | 33.6115  | 33.66833 | 5  | 1 | 4 | 244805.6 | 1471963  | 1530388  |
| 681.3547 | 10.86479 | 10.84945 | 10.88395 | 4  | 1 | 3 | 457157.7 | 488794.6 | 960002.6 |
| 347.6122 | 9.500283 | 9.474117 | 9.537367 | 5  | 2 | 3 | 3347448  | 6669550  | 7711013  |
| 508.9138 | 21.6935  | 21.5865  | 21.71283 | 7  | 2 | 5 | 290091.6 | 704843.9 | 975283.4 |
| 619.4805 | 16.54495 | 16.51863 | 16.58867 | 9  | 4 | 5 | 6363728  | 33999964 | 26591013 |
| 357.5377 | 9.47815  | 9.43065  | 9.537367 | 3  | 0 | 3 | 3505725  | 1679548  | 3297714  |
| 247.0961 | 23.79483 | 23.761   | 23.79717 | 5  | 2 | 3 | 78272.8  | 93939.95 | 91194.48 |
| 624.2757 | 30.26658 | 30.23533 | 30.36167 | 10 | 5 | 5 | 2345662  | 7641386  | 10780626 |
| 373.3144 | 28.23483 | 28.19167 | 28.2685  | 5  | 3 | 2 | 35434.07 | 108865.9 | 106458.7 |
| 392.3372 | 38.6465  | 38.5785  | 38.78    | 7  | 5 | 2 | 38842.23 | 246017.7 | 195947.8 |
| 342.1808 | 10.87912 | 10.80383 | 10.93685 | 7  | 2 | 5 | 1915451  | 2275522  | 3966367  |

|          |          |          |          |    |   |   |          |          |          |
|----------|----------|----------|----------|----|---|---|----------|----------|----------|
| 443.2394 | 36.4395  | 36.4245  | 36.47133 | 3  | 0 | 3 | 34270.84 | 204152.5 | 125982.7 |
| 244.2276 | 24.48092 | 24.428   | 24.52033 | 8  | 3 | 5 | 137875.2 | 585306.2 | 591190.2 |
| 791.8984 | 10.67828 | 10.63273 | 10.77118 | 5  | 0 | 5 | 3465570  | 3621105  | 7362903  |
| 727.5652 | 9.490442 | 9.460417 | 9.537367 | 4  | 1 | 3 | 6649760  | 4707914  | 10109410 |
| 840.5701 | 29.75333 | 29.73817 | 29.77283 | 10 | 5 | 5 | 461270.9 | 4538898  | 652601.1 |
| 426.3132 | 44.42375 | 44.39583 | 44.51433 | 10 | 5 | 5 | 254811.5 | 999978.4 | 1505550  |
| 675.3407 | 9.500675 | 9.460417 | 9.545617 | 4  | 1 | 3 | 16813878 | 7596765  | 16355351 |
| 413.0098 | 13.71818 | 13.46225 | 13.76748 | 6  | 1 | 4 | 331821.2 | 1178945  | 2303025  |
| 230.1753 | 11.95501 | 11.9344  | 12.119   | 4  | 1 | 3 | 373172.2 | 1063282  | 684966   |
| 466.2287 | 12.42266 | 12.39998 | 12.49147 | 6  | 2 | 4 | 36298.95 | 107857.3 | 83430.33 |
| 366.1395 | 28.81542 | 28.7945  | 28.8925  | 4  | 3 | 1 | 419516.6 | 2114784  | 2943578  |
| 419.8153 | 32.798   | 32.78083 | 32.90917 | 7  | 5 | 2 | 141229.1 | 299463.9 | 253890.7 |
| 456.1681 | 20.65617 | 20.628   | 20.7015  | 5  | 2 | 3 | 199965.9 | 552780.9 | 468439.7 |
| 551.2681 | 22.31133 | 22.27467 | 22.37667 | 7  | 2 | 4 | 83418.67 | 261034.9 | 300414.3 |
| 267.1959 | 26.38392 | 26.346   | 26.43017 | 4  | 1 | 3 | 1248788  | 3785448  | 4805784  |
| 449.1734 | 26.654   | 26.65017 | 26.66483 | 5  | 2 | 3 | 39866.55 | 139121.9 | 154503   |
| 642.2473 | 29.1035  | 29.08283 | 29.163   | 4  | 3 | 1 | 96693.31 | 313433.5 | 301934.8 |
| 472.3582 | 8.892067 | 8.677417 | 8.96155  | 8  | 5 | 3 | 4313406  | 9438930  | 9608016  |
| 228.2323 | 32.342   | 32.327   | 32.364   | 7  | 3 | 4 | 278137.5 | 1249715  | 1391630  |
| 399.2032 | 29.72467 | 29.65167 | 29.74183 | 5  | 4 | 1 | 37519060 | 1209718  | 2199136  |
| 213.2409 | 27.926   | 27.89667 | 28.00783 | 7  | 3 | 4 | 61389.24 | 266549.2 | 138500   |
| 754.5234 | 29.82675 | 29.81067 | 29.834   | 10 | 5 | 5 | 155240.5 | 1474992  | 260211.2 |
| 581.2437 | 41.21517 | 41.193   | 41.25083 | 4  | 3 | 1 | 74081.79 | 366908.3 | 189830.9 |
| 341.2331 | 22.82567 | 22.81183 | 22.8565  | 3  | 0 | 3 | 189718.6 | 209312.9 | 75190.44 |
| 347.629  | 9.489217 | 9.473767 | 9.537367 | 4  | 1 | 3 | 32576156 | 30851223 | 50019488 |
| 791.3969 | 10.67222 | 10.66402 | 10.68362 | 4  | 1 | 3 | 3292430  | 3687477  | 7485380  |
| 310.1656 | 10.17194 | 10.03047 | 10.2073  | 6  | 2 | 3 | 223102.7 | 252144.6 | 321994   |
| 426.2909 | 39.729   | 39.67933 | 39.79133 | 5  | 3 | 2 | 28048.59 | 152824.1 | 110681.6 |
| 684.2595 | 9.500675 | 9.460417 | 9.545617 | 4  | 1 | 3 | 23132794 | 10534949 | 21718797 |
| 357.2316 | 37.00658 | 36.94767 | 37.04933 | 4  | 0 | 4 | 75494.94 | 309232.1 | 102976   |
| 328.1577 | 25.66767 | 25.63817 | 25.70383 | 7  | 2 | 5 | 129435   | 317637.4 | 466668.9 |
| 568.444  | 9.121875 | 8.988167 | 9.172217 | 8  | 5 | 3 | 311329.4 | 1089266  | 798281.7 |
| 314.184  | 15.64528 | 15.57568 | 15.70415 | 5  | 2 | 3 | 37682.15 | 79789.92 | 98274.99 |
| 514.4223 | 34.64367 | 34.63667 | 34.65967 | 7  | 3 | 4 | 554863.2 | 898983.9 | 442615   |
| 518.9066 | 30.99808 | 30.90417 | 31.083   | 4  | 1 | 3 | 218377.1 | 686559.8 | 426536.8 |
| 341.1182 | 9.526183 | 9.463983 | 9.545617 | 4  | 1 | 3 | 30909148 | 19243093 | 24656826 |
| 332.1118 | 9.500283 | 9.460417 | 9.545617 | 5  | 2 | 3 | 4841616  | 6531692  | 9655751  |
| 834.6164 | 34.786   | 34.76917 | 34.82217 | 5  | 2 | 3 | 444699.6 | 4179716  | 3847465  |
| 622.2604 | 29.12592 | 29.09717 | 29.22633 | 10 | 5 | 5 | 2572096  | 9766185  | 12476658 |
| 381.1733 | 35.042   | 35.02583 | 35.08833 | 3  | 0 | 3 | 41380.66 | 224267   | 99400.08 |
| 285.1028 | 13.65492 | 13.52028 | 13.76545 | 7  | 4 | 3 | 251362.3 | 1068986  | 959880.3 |
| 478.3534 | 16.18897 | 16.11055 | 16.22193 | 10 | 5 | 5 | 916881.4 | 2924825  | 3308754  |
| 361.6167 | 10.67574 | 10.63273 | 10.75237 | 8  | 3 | 5 | 207401.5 | 806046.7 | 825785.9 |
| 261.1102 | 12.96893 | 12.83283 | 13.1078  | 10 | 5 | 4 | 8100210  | 7492807  | 9141669  |
| 376.0048 | 9.497525 | 9.460417 | 9.537367 | 4  | 1 | 3 | 10234521 | 7823171  | 15417801 |
| 730.5323 | 37.28483 | 37.25233 | 37.3985  | 10 | 5 | 5 | 178880.2 | 977874.1 | 983434.6 |
| 372.9675 | 21.69433 | 21.67933 | 21.7275  | 5  | 2 | 3 | 91543.88 | 260832.8 | 356921.4 |

|          |          |          |          |    |   |   |          |          |          |
|----------|----------|----------|----------|----|---|---|----------|----------|----------|
| 362.2981 | 30.65783 | 30.61667 | 30.70933 | 9  | 4 | 5 | 1717123  | 4088389  | 3610394  |
| 412.0051 | 22.12717 | 22.08717 | 22.16383 | 7  | 3 | 4 | 197282.2 | 966733.7 | 1031134  |
| 461.3744 | 29.62208 | 29.57683 | 29.70967 | 10 | 5 | 5 | 827395.8 | 3311619  | 3539504  |
| 656.089  | 23.876   | 23.83917 | 23.915   | 4  | 1 | 3 | 38153.74 | 42185.88 | 91899.79 |
| 468.2036 | 26.973   | 26.95617 | 27.01333 | 5  | 2 | 3 | 39098.64 | 179098.5 | 105973.7 |
| 606.4275 | 43.441   | 43.39683 | 43.4555  | 3  | 0 | 3 | 64147.76 | 329576.8 | 78908.67 |
| 695.7821 | 41.208   | 41.1485  | 41.25083 | 5  | 1 | 4 | 167615.3 | 63568.08 | 57569.13 |
| 428.0796 | 16.19133 | 16.17295 | 16.20503 | 5  | 1 | 4 | 127686.8 | 269650.8 | 484624.1 |
| 445.2214 | 10.84825 | 10.79637 | 11.07932 | 7  | 3 | 3 | 689726.1 | 1504693  | 1645497  |
| 245.1864 | 9.693142 | 9.602367 | 9.751083 | 6  | 3 | 3 | 2536385  | 3661662  | 2925500  |
| 464.0134 | 18.13217 | 18.089   | 18.18483 | 5  | 2 | 3 | 217135   | 619099.5 | 865229.9 |
| 577.3686 | 9.862483 | 9.817433 | 9.8904   | 5  | 2 | 3 | 406099.5 | 260919.7 | 345805.7 |
| 386.2177 | 31.235   | 31.00267 | 31.32617 | 7  | 2 | 4 | 83473.62 | 337381.2 | 374619.6 |
| 392.2282 | 43.62383 | 43.563   | 43.66167 | 6  | 1 | 5 | 340583.5 | 5722073  | 1560411  |
| 242.0689 | 15.85511 | 15.77802 | 15.88447 | 6  | 3 | 3 | 77110.87 | 243328.4 | 314156.6 |
| 261.0527 | 17.1625  | 17.03717 | 17.16383 | 5  | 2 | 3 | 53318.58 | 167260.9 | 131020.8 |
| 314.6409 | 30.26517 | 30.10267 | 30.34733 | 6  | 1 | 4 | 96992.59 | 230342.8 | 385808.4 |
| 628.1852 | 26.13392 | 26.11083 | 26.17883 | 8  | 4 | 4 | 348460.6 | 306044.4 | 223313.6 |
| 251.1281 | 24.69717 | 24.666   | 24.75017 | 9  | 4 | 5 | 1028537  | 5088054  | 5807151  |
| 225.0607 | 37.408   | 37.40167 | 37.41567 | 3  | 3 | 0 | 21800.6  | 166979   | 90944.76 |
| 269.1033 | 25.6825  | 25.64683 | 25.69883 | 7  | 2 | 5 | 513072.2 | 1266494  | 2293819  |
| 281.0455 | 22.0905  | 22.03667 | 22.1355  | 6  | 3 | 3 | 112362.9 | 430908.5 | 445071.1 |
| 438.3697 | 18.93842 | 18.90933 | 18.96767 | 10 | 5 | 5 | 594025   | 828482.9 | 659596.2 |
| 601.3717 | 11.29562 | 11.27393 | 11.30345 | 4  | 3 | 1 | 90058.77 | 282760.1 | 310964.7 |
| 349.2952 | 31.75125 | 31.69683 | 31.80133 | 10 | 5 | 5 | 506263.7 | 1434300  | 1713657  |
| 340.9078 | 9.527133 | 9.47815  | 9.598583 | 6  | 3 | 3 | 7347867  | 5217430  | 6674364  |
| 315.1095 | 9.8518   | 9.73415  | 9.91985  | 5  | 2 | 3 | 72453.74 | 130186.6 | 116704.9 |
| 372.7684 | 21.47717 | 21.35633 | 21.52367 | 9  | 5 | 4 | 1568012  | 3970086  | 4299229  |
| 299.1274 | 26.8765  | 26.85467 | 26.919   | 6  | 2 | 4 | 133982.7 | 434047.5 | 468284.2 |
| 347.2223 | 12.51305 | 12.49515 | 12.57518 | 8  | 4 | 4 | 440094.3 | 1915602  | 2173599  |
| 355.2238 | 9.687417 | 9.602367 | 9.7372   | 7  | 4 | 3 | 7930093  | 17216912 | 18318770 |
| 516.3756 | 11.1597  | 11.1221  | 11.18453 | 4  | 1 | 3 | 56611.81 | 92348.54 | 125947.8 |
| 504.9549 | 28.95267 | 28.9425  | 28.96567 | 4  | 1 | 3 | 44289.43 | 69176.25 | 130831.9 |
| 457.5746 | 9.209233 | 9.101033 | 9.280533 | 6  | 4 | 2 | 1063271  | 2208369  | 1647759  |
| 1049.729 | 9.500283 | 9.460417 | 9.5641   | 5  | 2 | 3 | 3634057  | 2689044  | 3141675  |
| 284.9905 | 23.00792 | 22.97417 | 23.01883 | 6  | 1 | 5 | 179106.3 | 462262.8 | 825661.1 |
| 276.7289 | 9.526183 | 9.474117 | 9.584433 | 8  | 5 | 3 | 58955140 | 1.99E+08 | 2.53E+08 |
| 314.2891 | 26.083   | 26.03483 | 26.11333 | 6  | 3 | 3 | 46520.84 | 150361.4 | 144538.6 |
| 470.3433 | 10.69263 | 10.63273 | 10.77118 | 5  | 1 | 4 | 635953.5 | 561426.1 | 792371.8 |
| 536.0678 | 22.44833 | 22.406   | 22.46783 | 5  | 2 | 3 | 43800.19 | 65132.23 | 89186.87 |
| 506.3608 | 33.2655  | 33.204   | 33.3615  | 5  | 3 | 2 | 105824.6 | 580249.6 | 714561.6 |
| 339.1534 | 14.78127 | 14.72912 | 14.90665 | 10 | 5 | 5 | 2680776  | 10321414 | 12918888 |
| 480.3038 | 9.186383 | 9.101033 | 9.2529   | 7  | 5 | 2 | 2.61E+08 | 2.09E+08 | 3.41E+08 |
| 653.4659 | 38.25808 | 38.20667 | 38.37433 | 6  | 2 | 4 | 44272.17 | 149933.4 | 137912   |
| 430.2229 | 23.18842 | 23.17983 | 23.19583 | 4  | 0 | 4 | 52004.34 | 100658.1 | 70432.41 |
| 355.2385 | 12.20061 | 12.18762 | 12.25337 | 6  | 2 | 4 | 59983.79 | 125897.5 | 139986.9 |
| 295.2102 | 26.31033 | 26.23883 | 26.38283 | 10 | 5 | 5 | 374874   | 1430979  | 1541946  |

|          |          |          |          |    |   |   |          |          |          |
|----------|----------|----------|----------|----|---|---|----------|----------|----------|
| 200.1002 | 18.11917 | 18.02683 | 18.155   | 6  | 3 | 3 | 66972.44 | 370897.6 | 390695.3 |
| 389.1825 | 14.27528 | 14.2308  | 14.30768 | 7  | 3 | 4 | 195615.2 | 535422.1 | 972905.5 |
| 304.2638 | 34.63417 | 34.5945  | 34.6865  | 6  | 3 | 3 | 65933.03 | 367812.9 | 305871   |
| 639.7725 | 34.39625 | 34.37217 | 34.46733 | 6  | 2 | 4 | 76594.57 | 73176.7  | 97915.1  |
| 327.15   | 25.689   | 25.63817 | 25.7215  | 9  | 5 | 4 | 291659.6 | 946765.3 | 1320370  |
| 594.3548 | 32.715   | 32.64817 | 32.71567 | 3  | 3 | 0 | 150651.9 | 418757.8 | 736239.4 |
| 246.1031 | 28.22058 | 28.20033 | 28.235   | 6  | 2 | 4 | 24545.3  | 123093.9 | 86410.93 |
| 586.3576 | 42.69367 | 42.67967 | 42.75683 | 5  | 2 | 3 | 38979.5  | 96818.03 | 63910.2  |
| 442.5631 | 35.16167 | 35.147   | 35.21983 | 9  | 4 | 5 | 46077.29 | 155479.4 | 132477.2 |
| 511.2364 | 20.43833 | 20.4255  | 20.464   | 5  | 2 | 3 | 264880.9 | 576990.2 | 895209.2 |
| 465.1743 | 20.62283 | 20.58967 | 20.63733 | 4  | 4 | 0 | 52876.53 | 151150.6 | 91074.56 |
| 337.7054 | 17.2215  | 17.18383 | 17.25317 | 7  | 2 | 5 | 368178.6 | 698553.7 | 1016766  |
| 598.3519 | 31.64117 | 31.61217 | 31.65933 | 5  | 3 | 2 | 131496.9 | 363678.9 | 439892.2 |
| 452.2082 | 28.6525  | 28.6415  | 28.6675  | 3  | 0 | 3 | 122819.8 | 615059.7 | 218385.5 |
| 687.5099 | 37.42058 | 37.38983 | 37.5325  | 8  | 4 | 4 | 84445.43 | 412179   | 444352.5 |
| 502.1168 | 13.338   | 13.3133  | 13.38837 | 4  | 1 | 3 | 1078788  | 2479403  | 5445154  |
| 425.8364 | 44.80183 | 44.76767 | 44.86    | 8  | 4 | 4 | 52843.05 | 341554.3 | 75873.21 |
| 659.5056 | 9.463983 | 9.459367 | 9.537367 | 5  | 2 | 3 | 91729304 | 63001096 | 1.12E+08 |
| 680.4975 | 10.45783 | 10.36523 | 10.51178 | 8  | 4 | 4 | 7800815  | 12238510 | 11012667 |
| 759.3785 | 43.60925 | 43.54283 | 43.67883 | 6  | 3 | 3 | 44875.24 | 139632.4 | 59049.39 |
| 499.3424 | 39.99442 | 39.95467 | 40.0335  | 8  | 3 | 5 | 102199   | 233078.9 | 87941.47 |
| 511.9115 | 9.136833 | 9.037133 | 9.231383 | 5  | 3 | 2 | 2005413  | 1516825  | 1528326  |
| 196.1051 | 21.444   | 21.31517 | 21.473   | 9  | 4 | 5 | 179858   | 568685.5 | 561647.7 |
| 513.3454 | 26.87383 | 26.8395  | 26.89133 | 4  | 3 | 1 | 32300.82 | 90646.31 | 70816.16 |
| 409.0023 | 21.79333 | 21.76967 | 21.80067 | 3  | 0 | 3 | 147561.7 | 322531.7 | 452245.3 |
| 496.3847 | 35.76225 | 35.73217 | 35.80017 | 10 | 5 | 5 | 835671.3 | 3982648  | 4386147  |
| 261.0788 | 21.708   | 21.57183 | 21.7275  | 7  | 2 | 5 | 231895.4 | 789809.3 | 908366.3 |
| 327.1149 | 21.70367 | 21.67933 | 21.728   | 5  | 5 | 0 | 393474.3 | 953672.6 | 563787.3 |
| 365.2244 | 10.67574 | 10.63755 | 10.77118 | 8  | 4 | 4 | 2867880  | 11572538 | 10239181 |
| 671.2258 | 29.21267 | 29.199   | 29.29983 | 5  | 1 | 4 | 173497.4 | 330987.5 | 496632.4 |
| 466.3741 | 38.02233 | 37.96317 | 38.08317 | 5  | 2 | 3 | 48400.94 | 202149.6 | 174950.1 |
| 484.1293 | 41.70842 | 41.64283 | 41.7295  | 10 | 5 | 5 | 371808.8 | 4177264  | 527910.6 |
| 463.0356 | 21.13833 | 21.11167 | 21.15517 | 5  | 2 | 3 | 157175.5 | 323882   | 481100   |
| 553.7253 | 42.37883 | 42.35783 | 42.44883 | 9  | 4 | 5 | 84935.84 | 734227.3 | 76860.75 |
| 660.4967 | 28.23483 | 28.08833 | 28.29917 | 7  | 3 | 4 | 110864.6 | 277275   | 156139.1 |
| 498.3642 | 29.37375 | 29.358   | 29.38833 | 6  | 2 | 4 | 1489778  | 427819.9 | 415711.8 |
| 547.2998 | 29.18117 | 29.14083 | 29.215   | 6  | 5 | 1 | 187322   | 563589.6 | 615216.4 |
| 306.1969 | 17.93017 | 17.911   | 17.942   | 3  | 0 | 3 | 251018.1 | 293744.8 | 197469.2 |
| 401.0637 | 22.979   | 22.943   | 23.01883 | 10 | 5 | 5 | 933500.8 | 2957031  | 4287531  |
| 383.1765 | 22.1075  | 22.005   | 22.12217 | 7  | 2 | 5 | 369098.8 | 850985.6 | 922398.3 |
| 227.0983 | 10.40873 | 10.36523 | 10.5262  | 8  | 2 | 5 | 3085512  | 3430835  | 6831549  |
| 295.1    | 24.8905  | 24.88817 | 24.89633 | 3  | 0 | 3 | 27227.96 | 72884.32 | 41662.9  |
| 425.2448 | 20.469   | 20.43733 | 20.62317 | 7  | 3 | 4 | 77375.45 | 144503.1 | 113607   |
| 393.2646 | 25.71367 | 25.66133 | 25.726   | 3  | 0 | 3 | 77939.52 | 183344.6 | 152373.9 |
| 648.8669 | 22.9745  | 22.9375  | 23.0335  | 5  | 1 | 4 | 74298.51 | 92915.11 | 165257.4 |
| 638.458  | 43.33933 | 43.24817 | 43.36683 | 7  | 3 | 4 | 28592.51 | 99844.57 | 43940.26 |
| 585.3544 | 42.70692 | 42.66483 | 42.74367 | 10 | 5 | 5 | 119729.5 | 352778.8 | 337485.8 |

|          |          |          |          |    |   |   |          |          |          |
|----------|----------|----------|----------|----|---|---|----------|----------|----------|
| 495.3523 | 17.282   | 17.26633 | 17.31133 | 6  | 2 | 4 | 75696.15 | 98007.38 | 136177.7 |
| 376.8306 | 9.514858 | 9.460417 | 9.545617 | 4  | 1 | 3 | 5409509  | 4683430  | 8748381  |
| 324.1457 | 28.95583 | 28.9125  | 28.96567 | 4  | 1 | 3 | 51090.44 | 105750.1 | 162070.6 |
| 501.0907 | 38.15017 | 38.1125  | 38.20067 | 5  | 1 | 4 | 57657.15 | 114228   | 235902.2 |
| 567.0451 | 30.777   | 30.5025  | 30.86417 | 5  | 1 | 4 | 110733.1 | 179090.2 | 393755.2 |
| 504.0623 | 21.1345  | 21.11167 | 21.15517 | 6  | 2 | 4 | 155113   | 353865.6 | 532728.4 |
| 345.1776 | 10.86437 | 10.80383 | 10.95503 | 6  | 3 | 3 | 362152.2 | 449530.9 | 545844.2 |
| 404.1471 | 10.40732 | 10.34715 | 10.45412 | 9  | 5 | 4 | 252745.3 | 632483   | 837237.5 |
| 205.0862 | 30.84833 | 30.73283 | 30.90333 | 10 | 5 | 5 | 6775726  | 44127692 | 34506586 |
| 362.983  | 21.69708 | 21.57183 | 21.71283 | 8  | 3 | 5 | 862439.1 | 2740735  | 3786556  |
| 793.5728 | 28.77533 | 28.7595  | 28.78033 | 7  | 3 | 4 | 124223.1 | 387658.2 | 475876.8 |
| 507.9058 | 21.67283 | 21.57183 | 21.7275  | 6  | 2 | 4 | 80475.39 | 239544.7 | 368987   |
| 405.0299 | 21.6935  | 21.54233 | 21.7275  | 7  | 2 | 5 | 296048.4 | 790876.3 | 1087786  |
| 391.0575 | 18.9385  | 18.90983 | 18.967   | 9  | 4 | 5 | 201930   | 1040473  | 1084018  |
| 252.2438 | 13.13119 | 13.09513 | 13.21922 | 10 | 5 | 5 | 5244764  | 26954990 | 30255311 |
| 654.9697 | 9.4622   | 9.43065  | 9.537367 | 4  | 1 | 3 | 2712737  | 2376079  | 4026050  |
| 203.7903 | 9.515    | 9.474117 | 9.545617 | 5  | 2 | 3 | 7278672  | 7913896  | 9405281  |
| 479.0093 | 26.96717 | 26.9415  | 27.01333 | 5  | 1 | 4 | 46990.51 | 67049.11 | 99684.77 |
| 403.1213 | 15.64528 | 15.55007 | 15.6926  | 9  | 4 | 5 | 185804.8 | 481868.6 | 912003   |
| 546.343  | 42.62292 | 42.57867 | 42.6445  | 10 | 5 | 5 | 122560.1 | 604707.7 | 401330.6 |
| 458.0569 | 20.43833 | 20.4115  | 20.56367 | 7  | 2 | 5 | 1074632  | 2634558  | 4101293  |
| 574.9559 | 22.99133 | 22.97417 | 23.01883 | 7  | 2 | 5 | 512828.3 | 1085368  | 1981167  |
| 313.1219 | 22.09458 | 21.9715  | 22.15067 | 4  | 1 | 3 | 348613.5 | 1391475  | 1318107  |
| 950.5984 | 43.62483 | 43.54783 | 43.649   | 8  | 4 | 4 | 61025.71 | 288499.6 | 77325.01 |
| 466.3172 | 15.80095 | 15.72362 | 15.90278 | 9  | 5 | 4 | 107243.7 | 403307.1 | 354780.7 |
| 345.9801 | 21.69633 | 21.67117 | 21.74217 | 5  | 1 | 4 | 80758.58 | 214605.9 | 296715.8 |
| 363.205  | 10.70644 | 10.62313 | 10.74668 | 6  | 3 | 3 | 99791560 | 60551523 | 1.08E+08 |
| 657.5939 | 9.482133 | 9.444983 | 9.537367 | 4  | 1 | 3 | 41516608 | 36117649 | 61458931 |
| 348.1467 | 9.5169   | 9.47815  | 9.626317 | 5  | 2 | 3 | 13200376 | 10271779 | 15355015 |
| 233.1111 | 11.70632 | 11.65528 | 11.93567 | 9  | 4 | 5 | 1319523  | 7040266  | 9242161  |
| 333.4692 | 9.515    | 9.474117 | 9.545617 | 5  | 2 | 3 | 12462712 | 13101276 | 20988882 |
| 348.7219 | 9.489217 | 9.349817 | 9.537367 | 6  | 3 | 3 | 5006343  | 7190404  | 11558100 |
| 469.0723 | 28.95767 | 28.88383 | 28.98033 | 5  | 1 | 4 | 147792.9 | 272643.5 | 516913.8 |
| 394.9554 | 11.06755 | 10.83542 | 11.13185 | 6  | 1 | 5 | 1751799  | 2927814  | 6126226  |
| 366.1819 | 9.5558   | 9.446567 | 9.845267 | 7  | 2 | 4 | 11553229 | 2427586  | 982077.9 |
| 533.9668 | 25.69067 | 25.64833 | 25.70383 | 6  | 1 | 5 | 64986.23 | 134082.3 | 285381.9 |
| 441.3119 | 11.50424 | 11.50023 | 11.5393  | 4  | 1 | 3 | 114719.2 | 168079.7 | 214876.2 |
| 313.2207 | 11.49257 | 11.48197 | 11.73068 | 5  | 2 | 3 | 71345.09 | 292670.3 | 237244.4 |
| 366.7236 | 9.55145  | 9.5025   | 9.584433 | 6  | 3 | 3 | 42365004 | 77434320 | 1.12E+08 |
| 698.9902 | 9.533475 | 9.444983 | 9.584433 | 8  | 5 | 3 | 14951906 | 31149205 | 39442356 |
| 648.1246 | 10.41003 | 10.37933 | 10.44485 | 4  | 1 | 3 | 760956.1 | 685500.7 | 1481145  |
| 485.2675 | 23.28158 | 23.25833 | 23.32917 | 6  | 2 | 4 | 101748.6 | 234815.4 | 331503.4 |
| 580.4235 | 9.85235  | 9.822817 | 9.876417 | 5  | 2 | 3 | 310350   | 303614.3 | 341615.2 |
| 218.6624 | 9.55215  | 9.500283 | 9.633383 | 3  | 3 | 0 | 754194.6 | 518222.5 | 445191   |
| 596.412  | 10.88867 | 10.84842 | 10.90023 | 6  | 2 | 4 | 248691   | 204487   | 330285.5 |
| 606.9616 | 22.76242 | 22.74667 | 22.78383 | 4  | 1 | 3 | 45533.17 | 66498.64 | 108463   |
| 300.1263 | 26.17467 | 26.15183 | 26.18083 | 6  | 2 | 4 | 89237.83 | 178205.3 | 267328.7 |

|          |          |          |          |    |   |   |          |          |          |
|----------|----------|----------|----------|----|---|---|----------|----------|----------|
| 401.7526 | 12.39613 | 12.36512 | 12.44293 | 4  | 1 | 3 | 70403.52 | 158495.5 | 222381.8 |
| 325.0222 | 17.13392 | 17.0515  | 17.2145  | 6  | 2 | 4 | 201806.9 | 661532.5 | 464124.9 |
| 904.373  | 10.67897 | 10.64782 | 10.77118 | 5  | 0 | 5 | 1768852  | 2353748  | 4505651  |
| 376.2603 | 19.74308 | 19.71067 | 19.8     | 10 | 5 | 5 | 692019.3 | 2583932  | 3349241  |
| 216.1751 | 11.02708 | 10.97798 | 11.1665  | 7  | 2 | 5 | 260088.4 | 847738.6 | 976399.5 |
| 720.512  | 34.32017 | 34.26183 | 34.32917 | 4  | 1 | 3 | 145295.9 | 131911   | 147419.4 |
| 373.2722 | 18.682   | 18.61117 | 18.7065  | 7  | 4 | 3 | 1591264  | 4406781  | 5730702  |
| 495.1806 | 23.783   | 23.76533 | 23.82633 | 4  | 1 | 3 | 37198.94 | 61564.89 | 80386.99 |
| 517.3713 | 34.63667 | 34.6005  | 34.658   | 5  | 2 | 3 | 104058.9 | 129448.2 | 147921.2 |
| 623.2636 | 29.12633 | 29.09717 | 29.22633 | 9  | 4 | 5 | 739773.8 | 2750943  | 3552903  |
| 485.0683 | 13.02208 | 12.91827 | 13.12275 | 7  | 2 | 4 | 263528.8 | 353602.4 | 755733   |
| 356.1135 | 18.91    | 18.8935  | 18.9245  | 5  | 3 | 2 | 41176.87 | 108304.6 | 117366.6 |
| 498.3918 | 35.81233 | 35.748   | 35.87433 | 5  | 2 | 3 | 27200.31 | 48767.6  | 32251.12 |
| 601.2788 | 30.862   | 30.8175  | 30.9455  | 8  | 3 | 5 | 266214.4 | 731140.5 | 1065195  |
| 924.6482 | 28.73167 | 28.6585  | 28.74767 | 5  | 2 | 3 | 39131.39 | 47984.34 | 66440.98 |
| 408.2945 | 9.806167 | 9.7192   | 9.862433 | 7  | 5 | 2 | 215021.9 | 324198.6 | 445516.3 |
| 522.3261 | 32.10258 | 31.96183 | 32.2365  | 4  | 1 | 3 | 511736.4 | 1625775  | 1257117  |
| 903.3697 | 10.67897 | 10.67828 | 10.77118 | 3  | 0 | 3 | 3986139  | 5463483  | 10566244 |
| 705.58   | 32.16225 | 32.11683 | 32.23267 | 6  | 3 | 3 | 130712.7 | 186132.8 | 155834.6 |
| 308.28   | 35.3085  | 35.21983 | 35.39833 | 5  | 2 | 3 | 19503.27 | 37096.43 | 47545.01 |
| 1971.141 | 9.515    | 9.463983 | 9.5571   | 5  | 2 | 3 | 28737290 | 24773726 | 39893021 |
| 434.2748 | 44.04983 | 43.89533 | 44.14967 | 4  | 3 | 1 | 47363.38 | 511158.7 | 126876   |
| 395.3182 | 17.59608 | 17.5895  | 17.6205  | 10 | 5 | 5 | 808286.2 | 3277539  | 3167788  |
| 301.2934 | 36.218   | 36.19983 | 36.34183 | 7  | 4 | 3 | 67241.48 | 341588.8 | 216682.7 |
| 376.1091 | 9.531333 | 9.49235  | 9.537367 | 3  | 0 | 3 | 2355145  | 2385100  | 4880477  |
| 576.7771 | 32.1265  | 32.0855  | 32.17667 | 4  | 1 | 3 | 432163.9 | 510574.5 | 1036971  |
| 345.3111 | 23.48733 | 23.473   | 23.5315  | 4  | 3 | 1 | 45528.07 | 188631.9 | 205268.5 |
| 439.3731 | 18.9245  | 18.89467 | 18.95317 | 5  | 3 | 2 | 127647.8 | 136752.8 | 107069.4 |
| 341.3248 | 38.08417 | 38.0535  | 38.25133 | 9  | 4 | 5 | 89315.22 | 466489.3 | 270797.6 |
| 342.4671 | 9.519    | 9.460417 | 9.537367 | 4  | 1 | 3 | 1826378  | 1176862  | 2349109  |
| 166.986  | 22.79675 | 22.77517 | 22.84267 | 6  | 2 | 4 | 80482.84 | 679570.6 | 519832.5 |
| 465.0336 | 11.07286 | 10.93657 | 11.12732 | 4  | 1 | 3 | 884197.3 | 840236.1 | 1826088  |
| 333.2071 | 9.25415  | 9.168467 | 9.31395  | 6  | 3 | 3 | 2045830  | 1779672  | 1833346  |
| 798.5499 | 29.79317 | 29.76983 | 29.81883 | 10 | 5 | 5 | 110239.6 | 944058.6 | 165012.1 |
| 186.1854 | 21.25233 | 21.1695  | 21.32917 | 7  | 3 | 4 | 97657.49 | 376885.5 | 457106.9 |
| 333.8136 | 9.503675 | 9.473767 | 9.537367 | 4  | 1 | 3 | 3107043  | 4670424  | 6377311  |
| 628.4378 | 10.85045 | 10.81753 | 10.93685 | 9  | 4 | 5 | 58662696 | 1.13E+08 | 1.57E+08 |
| 424.3064 | 13.37198 | 13.3346  | 13.45013 | 9  | 5 | 4 | 86146.55 | 238488.3 | 205351.5 |
| 452.3586 | 36.10167 | 36.09517 | 36.12783 | 9  | 4 | 5 | 352725.3 | 1719781  | 1850309  |
| 588.4332 | 23.30983 | 23.2975  | 23.344   | 6  | 2 | 4 | 199764.6 | 204872.2 | 243543.8 |
| 308.259  | 13.38471 | 13.34987 | 13.4342  | 10 | 5 | 5 | 2041384  | 9842120  | 11833221 |
| 269.0798 | 13.711   | 13.5054  | 13.76397 | 7  | 2 | 4 | 292681.7 | 1220810  | 1749993  |
| 504.874  | 44.17233 | 44.14433 | 44.21417 | 10 | 5 | 5 | 513290.5 | 6431171  | 1050859  |
| 569.4609 | 40.67733 | 40.64033 | 40.8995  | 10 | 5 | 5 | 318475.1 | 2220095  | 1294103  |
| 477.3694 | 20.78867 | 20.75867 | 20.83167 | 7  | 4 | 3 | 66818.55 | 143683.5 | 129375.1 |
| 344.1315 | 24.32058 | 24.28833 | 24.34483 | 6  | 2 | 4 | 38504.91 | 73930.86 | 99178.18 |
| 387.007  | 21.6935  | 21.54233 | 21.7275  | 7  | 2 | 5 | 647697   | 2021258  | 2815045  |



|          |          |          |          |    |   |   |          |          |          |
|----------|----------|----------|----------|----|---|---|----------|----------|----------|
| 395.5852 | 18.93867 | 18.90983 | 18.967   | 10 | 5 | 5 | 200875.6 | 1023264  | 1065160  |
| 546.1801 | 14.34685 | 14.3453  | 14.46363 | 5  | 1 | 3 | 53049.73 | 82095.48 | 163197.9 |
| 298.7094 | 10.86479 | 10.78073 | 10.89825 | 6  | 2 | 4 | 351220.7 | 350058.6 | 466782.9 |
| 484.8023 | 9.218233 | 9.101033 | 9.280533 | 6  | 4 | 2 | 4600449  | 4753025  | 7639170  |
| 235.1067 | 14.78242 | 14.74247 | 14.80298 | 4  | 1 | 3 | 32635.52 | 86399.83 | 99293.46 |
| 603.4113 | 29.92525 | 29.90167 | 29.93833 | 10 | 5 | 5 | 144547.2 | 1293599  | 153343.4 |
| 555.4301 | 37.82775 | 37.79533 | 37.886   | 6  | 3 | 3 | 49849.48 | 168575.4 | 189800.9 |
| 303.1485 | 21.70175 | 21.557   | 21.7275  | 10 | 5 | 5 | 203048.9 | 1305123  | 895612.6 |
| 379.1295 | 11.9015  | 11.8806  | 12.0492  | 9  | 4 | 5 | 210646.4 | 502224.3 | 704367.3 |
| 394.315  | 17.6005  | 17.5895  | 17.63133 | 10 | 5 | 5 | 6811685  | 36062767 | 32988945 |
| 476.3599 | 28.33667 | 28.283   | 28.35633 | 5  | 2 | 3 | 43718.91 | 93639.6  | 86157.37 |
| 286.2019 | 18.87883 | 18.86433 | 18.98183 | 3  | 0 | 3 | 89722.29 | 437449   | 397721.6 |
| 754.4823 | 9.65795  | 9.541233 | 9.70935  | 5  | 2 | 3 | 1170516  | 1230780  | 1597292  |
| 408.2099 | 19.61483 | 19.56817 | 19.67717 | 3  | 0 | 3 | 266396.2 | 711743.2 | 264772.6 |
| 500.1544 | 18.26325 | 18.2285  | 18.311   | 8  | 4 | 4 | 114750.8 | 268318.8 | 296423.2 |
| 559.0235 | 18.10567 | 18.089   | 18.16983 | 5  | 2 | 3 | 135185.7 | 294996   | 465564.4 |
| 226.0528 | 13.711   | 13.44777 | 13.76748 | 13 | 5 | 5 | 2532958  | 10162459 | 16831279 |
| 229.0962 | 10.40768 | 10.34782 | 10.44835 | 8  | 3 | 5 | 5878593  | 10480069 | 15763885 |
| 1737.45  | 9.541492 | 9.534967 | 9.6125   | 4  | 1 | 3 | 2590873  | 2859824  | 6161415  |
| 331.2311 | 23.78292 | 23.73983 | 23.8565  | 8  | 4 | 4 | 192063.2 | 484486.1 | 651309.4 |
| 345.1728 | 28.43317 | 28.42433 | 28.46717 | 5  | 1 | 4 | 111118.1 | 329095.9 | 208344.5 |
| 262.1197 | 26.23875 | 26.22817 | 26.28967 | 4  | 1 | 3 | 45660.72 | 78645.38 | 98436.83 |
| 1748.729 | 9.483058 | 9.460417 | 9.537367 | 4  | 1 | 3 | 4052328  | 4894654  | 10338355 |
| 472.9648 | 32.14108 | 32.07267 | 32.1585  | 6  | 1 | 5 | 79847.52 | 162624.1 | 359167.9 |
| 224.6209 | 18.9385  | 18.9085  | 18.967   | 5  | 1 | 4 | 103276.4 | 222549.8 | 304556.3 |
| 482.8029 | 9.218233 | 9.14945  | 9.387317 | 6  | 3 | 3 | 4906257  | 4046000  | 7492528  |
| 570.4661 | 40.68508 | 40.6315  | 40.79783 | 8  | 4 | 4 | 51253.47 | 260404.7 | 202280.9 |
| 396.9979 | 21.711   | 21.69333 | 21.7285  | 5  | 3 | 2 | 82547.44 | 368076.6 | 437007.9 |
| 648.9763 | 15.63703 | 15.61625 | 15.68465 | 4  | 1 | 3 | 44576.54 | 74367.09 | 154671.7 |
| 317.2119 | 14.8621  | 14.81905 | 15.01392 | 5  | 4 | 1 | 95646.45 | 458608.5 | 481329.4 |
| 428.2245 | 10.4086  | 10.34782 | 10.44485 | 8  | 3 | 5 | 23686772 | 36312752 | 61032551 |
| 703.1185 | 18.09467 | 18.047   | 18.16983 | 6  | 2 | 4 | 99873.94 | 166925.8 | 229367.8 |
| 182.1542 | 10.41965 | 10.37933 | 10.45412 | 7  | 3 | 4 | 3179416  | 12641437 | 12029935 |
| 158.1541 | 14.65399 | 14.51855 | 14.81483 | 8  | 3 | 5 | 176172.6 | 1545664  | 928748.5 |
| 417.0302 | 21.13833 | 21.05833 | 21.15517 | 7  | 2 | 5 | 959155.2 | 2427281  | 3681413  |
| 710.1383 | 28.36908 | 28.3175  | 28.46717 | 6  | 4 | 2 | 85476.97 | 184523.4 | 262838.8 |
| 398.827  | 7.179683 | 7.09035  | 7.235117 | 4  | 1 | 3 | 992167.1 | 318003.7 | 424959.4 |
| 625.2791 | 30.26283 | 30.23533 | 30.34733 | 9  | 4 | 5 | 723018.4 | 2221712  | 3208196  |
| 341.1494 | 14.77322 | 14.69997 | 14.80373 | 7  | 2 | 5 | 94613.98 | 242345.4 | 338163.2 |
| 369.6084 | 9.47815  | 9.416233 | 9.537367 | 3  | 0 | 3 | 2785678  | 1370088  | 2723778  |
| 393.3117 | 17.59608 | 17.57483 | 17.63133 | 10 | 5 | 5 | 26635426 | 1.46E+08 | 1.33E+08 |
| 424.2877 | 9.875217 | 9.763    | 9.904433 | 6  | 3 | 3 | 229413.4 | 236264.5 | 400742.6 |
| 419.0456 | 21.69667 | 21.557   | 21.7275  | 8  | 3 | 5 | 2268065  | 7039376  | 9691496  |
| 452.7406 | 9.239033 | 9.08515  | 9.290367 | 3  | 3 | 0 | 1190565  | 1290524  | 827980   |
| 266.1047 | 25.67992 | 25.6535  | 25.69883 | 8  | 3 | 5 | 243964   | 491853.9 | 974252.5 |
| 651.8648 | 23.006   | 22.9745  | 23.048   | 5  | 1 | 4 | 106181.3 | 141716.8 | 268680.5 |
| 722.1919 | 29.14033 | 29.05367 | 29.2115  | 7  | 2 | 5 | 93577.1  | 195882.7 | 365058.8 |

|          |          |          |          |    |   |   |          |          |          |
|----------|----------|----------|----------|----|---|---|----------|----------|----------|
| 333.9552 | 9.518825 | 9.49235  | 9.545617 | 4  | 1 | 3 | 4770708  | 4115777  | 5517205  |
| 647.4425 | 21.52967 | 21.45517 | 21.53517 | 5  | 3 | 2 | 50236.03 | 67284.83 | 75392.91 |
| 347.3216 | 20.715   | 20.7015  | 20.75867 | 3  | 0 | 3 | 126494   | 135204.9 | 172081.2 |
| 554.2301 | 18.38758 | 18.352   | 18.42417 | 8  | 4 | 4 | 76060.76 | 210493.4 | 241797.9 |
| 546.0088 | 26.875   | 26.849   | 26.9065  | 4  | 3 | 1 | 23022.53 | 46697.5  | 51711.87 |
| 373.7739 | 19.16675 | 19.12233 | 19.199   | 10 | 5 | 5 | 1638144  | 5377561  | 6619931  |
| 313.2501 | 10.71058 | 10.63273 | 10.75237 | 8  | 3 | 5 | 362416.7 | 753832.2 | 916037.2 |
| 215.1645 | 21.48708 | 21.35633 | 21.5225  | 6  | 2 | 4 | 268651.2 | 1673265  | 773423.2 |
| 389.3203 | 9.013883 | 8.8523   | 9.0728   | 5  | 4 | 1 | 378186.1 | 732555.4 | 596670.5 |
| 620.265  | 29.14083 | 29.09717 | 29.24117 | 7  | 2 | 5 | 220407.1 | 776694.6 | 850452.6 |
| 669.4859 | 43.18125 | 43.15933 | 43.24567 | 6  | 4 | 2 | 52469.18 | 433686.8 | 179746.7 |
| 331.1883 | 25.5945  | 25.54667 | 25.627   | 5  | 3 | 2 | 192442.5 | 430851.3 | 815123.2 |
| 277.2305 | 9.532875 | 9.423983 | 9.596683 | 8  | 5 | 3 | 21082480 | 60281922 | 78803306 |
| 305.2518 | 33.46175 | 33.40883 | 33.5045  | 10 | 5 | 5 | 369939.3 | 1703054  | 1721714  |
| 479.3571 | 16.1777  | 16.0967  | 16.22193 | 10 | 5 | 5 | 225371.6 | 732045.4 | 820502.5 |
| 669.1634 | 26.23183 | 26.21717 | 26.30383 | 6  | 2 | 4 | 85851.16 | 196672.3 | 264127.7 |
| 674.5065 | 21.77517 | 21.66133 | 21.83617 | 8  | 3 | 5 | 283695.6 | 2165652  | 2381959  |
| 228.1597 | 10.42227 | 10.37933 | 10.45412 | 7  | 3 | 4 | 3736589  | 15445339 | 14468833 |
| 394.1787 | 25.84833 | 25.80217 | 25.88133 | 8  | 4 | 4 | 279330.9 | 906049.3 | 1100665  |
| 209.154  | 22.3295  | 22.22933 | 22.349   | 10 | 5 | 5 | 657553   | 3573477  | 3395975  |
| 529.3165 | 42.61967 | 42.59017 | 42.63867 | 9  | 4 | 5 | 93649.21 | 309205.2 | 179439.6 |
| 400.0632 | 15.37968 | 15.33533 | 15.3949  | 5  | 2 | 3 | 54762.93 | 159730.6 | 211063.5 |
| 369.2925 | 9.476383 | 9.401867 | 9.537367 | 4  | 1 | 3 | 5410326  | 3337055  | 4681210  |
| 615.9434 | 43.44733 | 43.41733 | 43.49983 | 7  | 5 | 2 | 122942.6 | 1102630  | 249599.7 |
| 596.4257 | 33.46175 | 33.43633 | 33.52067 | 6  | 2 | 4 | 76964.37 | 241577.3 | 211363.7 |
| 309.2177 | 10.43465 | 10.36523 | 10.4545  | 4  | 1 | 3 | 532162.8 | 1536950  | 1357639  |
| 413.1264 | 23.85575 | 23.8245  | 23.87067 | 4  | 1 | 3 | 47750.1  | 70693.64 | 138613.9 |
| 267.2514 | 17.59258 | 17.58967 | 17.60433 | 4  | 3 | 1 | 141587.1 | 557598.2 | 535498.3 |
| 377.349  | 9.537367 | 9.49235  | 9.545617 | 3  | 0 | 3 | 3067076  | 3888262  | 7924859  |
| 371.1309 | 29.75783 | 29.75333 | 29.78317 | 4  | 0 | 4 | 321544.1 | 942812.4 | 1705293  |
| 334.1724 | 10.01852 | 9.9637   | 10.05848 | 6  | 3 | 3 | 3733154  | 5240886  | 9115588  |
| 246.0553 | 21.6935  | 21.57183 | 21.7275  | 7  | 2 | 5 | 216972   | 636970.5 | 748525.3 |
| 587.297  | 29.15542 | 29.11083 | 29.21933 | 4  | 3 | 1 | 254913.7 | 443010.9 | 691251.3 |
| 384.3228 | 11.77673 | 11.7146  | 11.94995 | 6  | 2 | 4 | 47980.32 | 112490.7 | 155576.5 |
| 668.4977 | 11.08221 | 11.06503 | 11.20103 | 4  | 1 | 3 | 165232.9 | 170155.1 | 264128.7 |
| 441.1851 | 33.30317 | 33.279   | 33.30867 | 5  | 2 | 3 | 40526.05 | 209080.1 | 119303.6 |
| 857.364  | 10.65585 | 10.62083 | 10.69392 | 4  | 1 | 3 | 3248772  | 4435239  | 8407989  |
| 204.0319 | 29.19125 | 29.16967 | 29.26133 | 4  | 1 | 3 | 74214.27 | 152023   | 302974   |
| 530.9341 | 19.55517 | 19.51717 | 19.599   | 5  | 1 | 4 | 95168.46 | 212207   | 419056.1 |
| 240.2326 | 20.15075 | 20.088   | 20.3295  | 8  | 3 | 5 | 90795.16 | 298538.6 | 247662.5 |
| 301.1594 | 24.20217 | 24.16583 | 24.25417 | 6  | 2 | 4 | 64416.88 | 291973.1 | 239746.8 |
| 285.0664 | 15.86298 | 15.83023 | 15.89117 | 6  | 1 | 5 | 152656.7 | 505598.4 | 556512.9 |
| 586.2369 | 31.00142 | 30.93717 | 31.07383 | 8  | 3 | 5 | 628236.2 | 884122.9 | 695461.1 |
| 420.7308 | 10.41965 | 10.36523 | 10.45412 | 9  | 4 | 5 | 978369.3 | 2967695  | 3977200  |
| 636.9531 | 43.31525 | 43.29333 | 43.36633 | 10 | 5 | 5 | 351344.6 | 4026728  | 919821.2 |
| 328.9159 | 21.62892 | 21.32033 | 21.9075  | 6  | 2 | 3 | 1329745  | 14080817 | 21814380 |
| 860.5738 | 21.25683 | 21.15667 | 21.27833 | 6  | 1 | 5 | 88626.13 | 189524.1 | 297113.6 |

|          |          |          |          |    |   |   |          |          |          |
|----------|----------|----------|----------|----|---|---|----------|----------|----------|
| 394.5379 | 23.39883 | 23.3875  | 23.463   | 4  | 0 | 4 | 68383.15 | 103914.3 | 152207.9 |
| 568.4576 | 40.67733 | 40.64033 | 40.91433 | 10 | 5 | 5 | 949149.6 | 7106186  | 4022503  |
| 683.2262 | 29.19475 | 29.18433 | 29.2705  | 4  | 1 | 3 | 90445.37 | 168034   | 295136.2 |
| 408.0092 | 22.12875 | 22.03667 | 22.15067 | 10 | 5 | 5 | 479258.1 | 2870831  | 3156179  |
| 429.2603 | 10.11792 | 10.08285 | 10.1405  | 4  | 1 | 3 | 254823.3 | 213536.1 | 165519.3 |
| 499.3054 | 9.2349   | 9.17955  | 9.446567 | 5  | 3 | 2 | 1218905  | 965783.4 | 1167208  |
| 390.978  | 21.6935  | 21.57183 | 21.714   | 7  | 2 | 5 | 1521565  | 5313758  | 7243622  |
| 337.2036 | 17.2135  | 17.17867 | 17.25317 | 8  | 3 | 5 | 953720.5 | 2353414  | 3423778  |
| 249.2066 | 14.5167  | 14.45605 | 14.67673 | 10 | 5 | 5 | 1204521  | 7503992  | 9298287  |
| 216.1598 | 10.09563 | 10.00593 | 10.2073  | 6  | 3 | 2 | 320146.6 | 926011.7 | 851260.1 |
| 573.9527 | 22.99258 | 22.943   | 23.01883 | 8  | 3 | 5 | 1860763  | 5088462  | 9503981  |
| 344.9727 | 18.13833 | 18.03083 | 18.1585  | 7  | 3 | 4 | 1342393  | 6507854  | 9775736  |
| 410.006  | 22.12492 | 22.03667 | 22.1365  | 10 | 5 | 5 | 260824.4 | 1322933  | 1484275  |
| 373.2701 | 21.47633 | 21.3425  | 21.53933 | 9  | 5 | 4 | 662122.8 | 1821111  | 2137138  |
| 922.6335 | 21.2905  | 21.20817 | 21.317   | 5  | 2 | 3 | 93076.01 | 268920.5 | 351226.5 |
| 500.9006 | 10.71478 | 10.63273 | 10.77118 | 4  | 1 | 3 | 158290.3 | 302455.9 | 594505.3 |
| 510.3558 | 32.48717 | 32.4095  | 32.60467 | 8  | 5 | 3 | 430323.9 | 2994514  | 2441589  |
| 635.2009 | 18.101   | 18.0455  | 18.13517 | 4  | 1 | 3 | 55659.32 | 67647.28 | 97624.07 |
| 613.2551 | 30.95083 | 30.928   | 31.0515  | 7  | 5 | 2 | 93938.32 | 603955.6 | 358016.9 |
| 338.2331 | 33.53808 | 33.49617 | 33.5675  | 4  | 0 | 4 | 98255.47 | 241771.6 | 123543.7 |
| 376.1246 | 13.0223  | 12.99103 | 13.06513 | 5  | 1 | 4 | 819255.3 | 969907.2 | 1566962  |
| 246.0216 | 12.67053 | 12.5098  | 12.84028 | 10 | 4 | 5 | 1091989  | 4068486  | 6834424  |
| 1740.301 | 9.5169   | 9.49235  | 9.537367 | 3  | 0 | 3 | 2141402  | 2129679  | 4469177  |
| 389.1289 | 28.644   | 28.59783 | 28.6585  | 5  | 2 | 3 | 104454.1 | 233030.6 | 198655.6 |
| 407.291  | 18.95317 | 18.90983 | 18.967   | 8  | 3 | 5 | 146630.9 | 631235.6 | 832349.7 |
| 273.1895 | 16.68525 | 16.64683 | 16.74017 | 10 | 5 | 5 | 481862.6 | 2910422  | 3045980  |
| 332.4544 | 9.500283 | 9.460417 | 9.545617 | 5  | 2 | 3 | 15321826 | 14598691 | 23769561 |
| 269.1906 | 14.52393 | 14.24182 | 14.66112 | 16 | 5 | 5 | 436825.8 | 1922500  | 2294760  |
| 371.1836 | 21.04283 | 20.9775  | 21.0525  | 7  | 4 | 3 | 187448.6 | 278308.3 | 230937.6 |
| 379.1313 | 18.26283 | 18.24317 | 18.563   | 5  | 2 | 3 | 44868.47 | 66307.98 | 83233.6  |
| 189.0213 | 11.04059 | 10.85075 | 11.14915 | 8  | 3 | 5 | 561688.2 | 1777164  | 3447904  |
| 301.274  | 34.658   | 34.594   | 34.704   | 5  | 1 | 4 | 112718.1 | 269926.8 | 327560.7 |
| 387.0191 | 28.96167 | 28.92233 | 28.97633 | 4  | 1 | 3 | 47949.09 | 78415.74 | 170804.5 |
| 538.6776 | 26.86775 | 26.849   | 26.89133 | 4  | 3 | 1 | 18922.81 | 43710.96 | 46856.1  |
| 376.3003 | 27.8535  | 27.76383 | 27.9155  | 7  | 3 | 4 | 310077.9 | 1757509  | 1965428  |
| 658.372  | 9.251833 | 9.192183 | 9.44975  | 5  | 2 | 3 | 1774079  | 927450.2 | 1414570  |
| 413.31   | 31.43025 | 31.34333 | 31.48083 | 6  | 3 | 3 | 80290.25 | 171702.3 | 115457.8 |
| 880.6227 | 28.7495  | 28.73167 | 28.7775  | 5  | 2 | 3 | 70381.2  | 167143.4 | 216398.5 |
| 383.1409 | 36.1875  | 36.134   | 36.218   | 5  | 2 | 3 | 199529.2 | 1229704  | 1954234  |
| 567.2263 | 26.23908 | 26.1715  | 26.2675  | 4  | 3 | 1 | 67336.6  | 125119.2 | 174081.9 |
| 499.0508 | 20.657   | 20.6415  | 20.687   | 5  | 2 | 3 | 120667.3 | 273918.2 | 410475.3 |
| 482.3013 | 9.225483 | 9.08515  | 9.363733 | 6  | 2 | 4 | 10300113 | 8343883  | 13103757 |
| 685.3499 | 22.62817 | 22.4645  | 22.64733 | 4  | 1 | 3 | 110442   | 357931.6 | 497874.6 |
| 453.3264 | 27.92467 | 27.83733 | 27.95633 | 5  | 2 | 3 | 1332496  | 1528642  | 1744948  |
| 289.2571 | 23.93742 | 23.83983 | 23.98317 | 8  | 4 | 4 | 122266.6 | 202444.7 | 218811.3 |
| 332.9225 | 9.515808 | 9.47815  | 9.537367 | 4  | 1 | 3 | 6853559  | 7514153  | 11844215 |
| 770.5621 | 12.38565 | 12.33628 | 12.41443 | 5  | 2 | 3 | 55441.79 | 99075.15 | 107245.3 |

|          |          |          |          |    |   |   |          |          |          |
|----------|----------|----------|----------|----|---|---|----------|----------|----------|
| 581.2165 | 28.39517 | 28.37133 | 28.46317 | 5  | 2 | 3 | 68638.66 | 143492.7 | 178075.6 |
| 557.2653 | 9.2114   | 9.173983 | 9.280533 | 6  | 4 | 2 | 1347993  | 1423991  | 1467479  |
| 534.9657 | 20.43792 | 20.4255  | 20.49367 | 6  | 2 | 4 | 144547.3 | 329204   | 549212.8 |
| 219.9487 | 9.529058 | 9.502483 | 9.5571   | 4  | 1 | 3 | 2893962  | 3412450  | 7197814  |
| 246.651  | 9.238783 | 9.08515  | 9.2529   | 7  | 4 | 3 | 1748283  | 6115477  | 5073057  |
| 242.2119 | 20.56133 | 20.52883 | 20.68767 | 7  | 5 | 2 | 184395.9 | 626990.5 | 657296.8 |
| 389.1997 | 10.97798 | 10.85045 | 11.06623 | 5  | 1 | 3 | 542703   | 572625.1 | 1116472  |
| 612.2525 | 32.10467 | 32.08817 | 32.2235  | 6  | 3 | 3 | 423719.3 | 1029258  | 823739.3 |
| 511.3232 | 19.99217 | 19.96167 | 20.14067 | 5  | 3 | 2 | 51635.86 | 152374.3 | 154205.4 |
| 272.2952 | 28.25142 | 28.2135  | 28.2795  | 10 | 5 | 5 | 447487.8 | 1362733  | 605128.5 |
| 1142.565 | 10.66473 | 10.64867 | 10.6797  | 5  | 2 | 3 | 2254435  | 3187351  | 6079189  |
| 375.3013 | 17.60433 | 17.5895  | 17.63133 | 10 | 5 | 5 | 880620.7 | 4142700  | 4063411  |
| 647.1209 | 10.3978  | 10.37933 | 10.41848 | 5  | 1 | 4 | 2773430  | 3141319  | 6393794  |
| 790.554  | 34.20133 | 34.14267 | 34.24883 | 9  | 4 | 5 | 329226.6 | 2998166  | 3628753  |
| 411.3226 | 17.0625  | 17.02633 | 17.09267 | 4  | 3 | 1 | 51559.35 | 143759.2 | 138552.5 |
| 211.1097 | 26.5595  | 26.50167 | 26.61917 | 6  | 2 | 4 | 201711.1 | 869037.9 | 728766.7 |
| 562.6909 | 10.19122 | 10.07575 | 10.20198 | 4  | 1 | 3 | 213009.4 | 89620.02 | 145265.9 |
| 453.2614 | 9.2265   | 9.0532   | 9.279383 | 4  | 3 | 1 | 2.39E+09 | 1.89E+09 | 2.59E+09 |
| 416.0307 | 25.68617 | 25.63383 | 25.70833 | 7  | 2 | 5 | 234663.7 | 580443.8 | 1105383  |
| 541.4528 | 9.741367 | 9.704283 | 9.7788   | 7  | 4 | 3 | 1400749  | 1541660  | 2451707  |
| 548.301  | 40.16725 | 39.89267 | 40.23667 | 10 | 4 | 3 | 264256.8 | 1866733  | 2461896  |
| 627.4346 | 10.85045 | 10.81753 | 10.95503 | 9  | 4 | 5 | 1.6E+08  | 3.13E+08 | 4.29E+08 |
| 858.1178 | 30.97867 | 30.95083 | 31.10817 | 5  | 1 | 4 | 73777.87 | 129143.2 | 281252.2 |
| 247.0252 | 12.73136 | 12.4807  | 12.84028 | 6  | 2 | 3 | 81927.96 | 217861.9 | 376566.3 |
| 403.0021 | 18.12825 | 18.0175  | 18.17383 | 10 | 5 | 5 | 235572.8 | 1305413  | 1352559  |
| 858.3671 | 10.67222 | 10.60262 | 10.712   | 4  | 1 | 3 | 1464619  | 1968363  | 4010706  |
| 767.4621 | 41.2005  | 41.16333 | 41.25083 | 8  | 4 | 4 | 52085.18 | 228420.9 | 184788.2 |
| 431.0217 | 18.13833 | 18.0455  | 18.189   | 7  | 2 | 5 | 85760.09 | 341031.6 | 457575.1 |
| 697.5243 | 9.226017 | 9.116917 | 9.416233 | 9  | 5 | 3 | 87547840 | 38588643 | 33404847 |
| 451.3145 | 29.73275 | 29.696   | 29.75333 | 10 | 5 | 5 | 126005.7 | 1189085  | 366991.8 |
| 376.4174 | 9.507758 | 9.460417 | 9.545617 | 4  | 1 | 3 | 11498689 | 8826523  | 17360562 |
| 744.4552 | 23.87467 | 23.824   | 23.90083 | 6  | 3 | 3 | 44457.73 | 110078.6 | 161754.7 |
| 360.1811 | 29.37383 | 29.26133 | 29.4255  | 9  | 4 | 5 | 1129047  | 5171387  | 4663867  |
| 343.308  | 9.537367 | 9.47815  | 9.572217 | 7  | 4 | 3 | 16159346 | 52373750 | 57216241 |
| 631.8036 | 9.526042 | 9.460417 | 9.537367 | 4  | 1 | 3 | 5909978  | 6118593  | 12355759 |
| 389.2559 | 9.6753   | 9.459367 | 9.751083 | 9  | 4 | 4 | 7761280  | 6814477  | 4659604  |
| 768.2296 | 41.20783 | 41.178   | 41.25083 | 5  | 3 | 2 | 68474.52 | 80456.85 | 99370.9  |
| 611.2929 | 10.66438 | 10.599   | 10.69782 | 6  | 2 | 4 | 4327006  | 4406934  | 9326918  |
| 356.993  | 22.13033 | 22.10867 | 22.14983 | 5  | 1 | 4 | 124577.8 | 379242.9 | 597431.1 |
| 380.2097 | 44.32617 | 44.30717 | 44.34617 | 7  | 3 | 4 | 131583.3 | 1684291  | 1402895  |
| 671.7276 | 29.23042 | 29.21333 | 29.2705  | 4  | 1 | 3 | 109374.5 | 171689.4 | 349889.5 |
| 485.3264 | 42.68233 | 42.636   | 42.72583 | 7  | 3 | 4 | 87356.93 | 305804.3 | 152631.1 |
| 792.5697 | 28.77483 | 28.72767 | 28.78033 | 9  | 4 | 5 | 278848.8 | 1043925  | 1236854  |
| 257.2476 | 34.67583 | 34.65083 | 34.71883 | 4  | 1 | 3 | 171026.4 | 582304.9 | 501224.1 |
| 485.3937 | 17.46525 | 17.4525  | 17.501   | 6  | 3 | 3 | 60194.06 | 136593.2 | 154106.8 |
| 528.2731 | 28.11742 | 28.05717 | 28.19083 | 10 | 5 | 5 | 301575.3 | 1108170  | 1237671  |
| 573.3652 | 30.27317 | 30.23533 | 30.352   | 9  | 5 | 4 | 106564.7 | 459934.8 | 430172.1 |

|          |          |          |          |    |   |   |          |          |          |
|----------|----------|----------|----------|----|---|---|----------|----------|----------|
| 239.0719 | 18.128   | 18.0555  | 18.1585  | 8  | 3 | 5 | 139967.7 | 1137328  | 529384   |
| 744.5304 | 21.48483 | 21.35633 | 21.52367 | 9  | 5 | 4 | 473757.7 | 1618015  | 1586775  |
| 417.03   | 20.43633 | 20.4115  | 20.45217 | 4  | 1 | 3 | 306133.9 | 662463.6 | 1069748  |
| 297.2401 | 34.691   | 34.67217 | 34.72917 | 8  | 5 | 3 | 493192.1 | 1539901  | 2607130  |
| 1116.607 | 10.67828 | 10.64782 | 10.712   | 5  | 1 | 4 | 1613474  | 1553634  | 3084307  |
| 606.2625 | 21.34592 | 21.288   | 21.41983 | 4  | 0 | 3 | 24957.28 | 39344.21 | 23449.2  |
| 790.5914 | 25.773   | 25.72083 | 25.8205  | 9  | 4 | 5 | 283633   | 2355563  | 2809802  |
| 199.1696 | 21.13642 | 21.05833 | 21.16083 | 8  | 4 | 4 | 859119.3 | 5123945  | 3079721  |
| 460.2697 | 23.17633 | 23.09983 | 23.21    | 10 | 5 | 5 | 814948.9 | 4463011  | 3050836  |
| 706.3294 | 26.74958 | 26.70683 | 26.79683 | 8  | 3 | 5 | 65136.8  | 220739.3 | 228604.8 |
| 298.1889 | 15.79183 | 15.76323 | 15.80702 | 4  | 1 | 3 | 32262.43 | 81803.28 | 90673.79 |
| 158.9737 | 2.08755  | 2.0466   | 2.167917 | 9  | 5 | 4 | 276249.8 | 881641   | 195796.6 |
| 369.2187 | 9.55075  | 9.4881   | 9.584433 | 9  | 5 | 4 | 60167972 | 1.24E+08 | 2.11E+08 |
| 505.3756 | 44.17192 | 44.1365  | 44.19833 | 10 | 5 | 5 | 295380.3 | 3204819  | 809044.5 |
| 319.1135 | 30.82083 | 30.48633 | 30.86767 | 7  | 3 | 3 | 76409.9  | 309345.7 | 303362.1 |
| 876.3795 | 32.127   | 32.11483 | 32.16417 | 6  | 1 | 5 | 353751.2 | 689496.3 | 1403291  |
| 404.2732 | 10.41377 | 10.36523 | 10.45082 | 6  | 2 | 4 | 1107960  | 3272426  | 4073162  |
| 377.1167 | 20.4375  | 20.4235  | 20.55133 | 7  | 2 | 5 | 1224428  | 4619307  | 6956640  |
| 764.1781 | 31.017   | 30.9645  | 31.06583 | 5  | 1 | 4 | 88976.74 | 155400.8 | 282836.8 |
| 480.1465 | 10.7321  | 10.6408  | 10.77882 | 5  | 2 | 3 | 149246.6 | 276283.4 | 156398.6 |
| 823.6059 | 31.41483 | 31.38667 | 31.46433 | 10 | 5 | 5 | 384020.7 | 1807077  | 917937.3 |
| 367.2206 | 9.55075  | 9.4881   | 9.584433 | 9  | 5 | 4 | 1.03E+09 | 2.42E+09 | 4.05E+09 |
| 255.1596 | 18.82283 | 18.80433 | 18.87783 | 6  | 3 | 3 | 2549356  | 5489460  | 8450406  |
| 453.896  | 9.4622   | 9.321717 | 9.537367 | 6  | 2 | 3 | 27126134 | 15689369 | 31423331 |
| 549.9038 | 43.87892 | 43.85333 | 43.91483 | 10 | 5 | 5 | 138272.4 | 1288627  | 253685.8 |
| 763.4685 | 9.563383 | 9.432667 | 9.626317 | 7  | 4 | 2 | 2166288  | 4569548  | 2391513  |
| 553.2695 | 9.186383 | 9.101033 | 9.2866   | 9  | 5 | 4 | 67945264 | 75871409 | 1.04E+08 |
| 340.1567 | 14.78127 | 14.72912 | 14.89145 | 10 | 5 | 5 | 549257.8 | 1747774  | 2398463  |
| 589.2507 | 10.75237 | 10.63528 | 10.7931  | 5  | 1 | 3 | 293347.6 | 252673.7 | 442249.6 |
| 376.3047 | 17.60433 | 17.5955  | 17.6205  | 4  | 1 | 3 | 197143   | 784219.5 | 758602.5 |
| 555.3549 | 9.7758   | 9.748017 | 9.834667 | 5  | 3 | 2 | 496243.1 | 309398   | 510001.4 |
| 417.0502 | 21.67933 | 21.557   | 21.7275  | 7  | 2 | 5 | 233489.2 | 599856.1 | 815646   |
| 443.3278 | 12.39328 | 12.35693 | 12.42927 | 6  | 2 | 4 | 46763.94 | 82415.33 | 126367.8 |
| 388.1296 | 26.63917 | 26.612   | 26.65017 | 5  | 2 | 3 | 33473.17 | 46037.21 | 52662.47 |
| 219.7644 | 9.511617 | 9.460417 | 9.537367 | 4  | 1 | 3 | 3453597  | 4624197  | 9927698  |
| 187.112  | 26.654   | 26.62717 | 26.67933 | 5  | 2 | 3 | 69680.98 | 325146.2 | 152968.6 |
| 210.2049 | 10.0792  | 9.934217 | 10.18403 | 9  | 5 | 3 | 873443.1 | 1794592  | 2447438  |
| 295.1108 | 18.77675 | 18.73683 | 18.83383 | 6  | 3 | 3 | 208753.3 | 811428.7 | 947942.9 |
| 223.0967 | 30.48567 | 30.36167 | 30.50117 | 7  | 3 | 4 | 1002519  | 4640124  | 5346669  |
| 462.1809 | 20.64767 | 20.58967 | 20.66767 | 3  | 3 | 0 | 31481.37 | 146312.3 | 74252.94 |
| 508.2669 | 9.199533 | 9.101033 | 9.2529   | 7  | 5 | 2 | 4754834  | 7163912  | 10747570 |
| 568.3906 | 32.5055  | 32.36383 | 32.52517 | 6  | 3 | 3 | 415965.5 | 997506.8 | 1759488  |
| 703.553  | 9.482133 | 9.444983 | 9.537367 | 4  | 1 | 3 | 52450568 | 46149081 | 76625276 |
| 332.8723 | 9.232742 | 9.1639   | 9.31395  | 6  | 4 | 2 | 3568840  | 3116778  | 3273215  |
| 364.2215 | 10.66553 | 10.63755 | 10.77118 | 9  | 4 | 5 | 29258146 | 1.31E+08 | 1.37E+08 |
| 449.0359 | 22.12267 | 22.05267 | 22.15117 | 9  | 5 | 4 | 226528.2 | 1212892  | 1321617  |
| 713.4823 | 35.33133 | 35.2805  | 35.339   | 4  | 1 | 3 | 58518.79 | 135397.6 | 162416   |

|          |          |          |          |    |   |   |          |          |          |
|----------|----------|----------|----------|----|---|---|----------|----------|----------|
| 324.2174 | 30.48583 | 30.36167 | 30.51617 | 5  | 4 | 1 | 316991.8 | 2423624  | 2005414  |
| 438.3429 | 32.32075 | 32.2815  | 32.3405  | 10 | 5 | 5 | 398250.3 | 1622195  | 1746081  |
| 309.1861 | 10.66473 | 10.58428 | 10.75237 | 9  | 4 | 5 | 311392.4 | 1232926  | 1541211  |
| 649.2709 | 34.39883 | 34.379   | 34.408   | 5  | 2 | 3 | 81705.93 | 97653.5  | 100858.9 |
| 336.0902 | 20.464   | 20.4255  | 20.55133 | 7  | 2 | 5 | 765391   | 2547912  | 3893847  |
| 758.5639 | 42.50633 | 42.46683 | 42.53083 | 5  | 2 | 3 | 28544.2  | 130425.3 | 84938.83 |
| 300.2046 | 25.90167 | 25.85367 | 25.92017 | 7  | 4 | 3 | 219685.5 | 513443.9 | 642395.6 |
| 349.2745 | 9.068567 | 8.9037   | 9.10085  | 3  | 3 | 0 | 2490855  | 1931409  | 1317596  |
| 363.218  | 10.66787 | 10.63755 | 10.77118 | 9  | 4 | 5 | 1.26E+08 | 5.72E+08 | 6.02E+08 |
| 195.1019 | 21.45217 | 21.31517 | 21.47633 | 10 | 5 | 5 | 1629969  | 8071316  | 7932810  |
| 458.0567 | 21.12917 | 21.09667 | 21.1485  | 6  | 2 | 4 | 548986.7 | 1523998  | 2209654  |
| 253.2471 | 13.13351 | 13.09513 | 13.21922 | 10 | 5 | 5 | 891510.8 | 3881910  | 4509659  |
| 186.9562 | 2.120333 | 2.062117 | 2.23355  | 5  | 3 | 2 | 143440.5 | 395920.3 | 376475.9 |
| 227.0958 | 14.90458 | 14.87452 | 14.92368 | 5  | 1 | 4 | 135889.2 | 316383.1 | 182016.6 |
| 570.5039 | 30.37033 | 30.35267 | 30.433   | 10 | 5 | 5 | 1072092  | 3280066  | 2648989  |
| 695.0231 | 42.83033 | 42.7515  | 42.939   | 4  | 1 | 3 | 87586.32 | 592318.1 | 632711.9 |
| 848.6328 | 27.54592 | 27.47433 | 27.59133 | 8  | 3 | 5 | 176166.4 | 1487405  | 1723056  |
| 326.9389 | 13.34265 | 13.22265 | 13.34552 | 5  | 1 | 4 | 655021.9 | 2804586  | 5243767  |
| 323.1421 | 28.96575 | 28.95033 | 28.97417 | 6  | 2 | 4 | 496599.6 | 1254990  | 1904721  |
| 774.5585 | 37.18408 | 37.14667 | 37.29367 | 8  | 3 | 5 | 120293.8 | 683171.9 | 672671.8 |
| 524.4219 | 19.84883 | 19.83067 | 19.973   | 9  | 4 | 5 | 179311.5 | 566094.2 | 656972   |
| 444.0408 | 13.02587 | 12.94742 | 13.12275 | 6  | 2 | 4 | 618973.7 | 807985.3 | 1734899  |
| 426.9987 | 15.84472 | 15.84463 | 15.8805  | 3  | 0 | 3 | 404630.7 | 1028664  | 1958608  |
| 602.4409 | 30.387   | 30.36683 | 30.4265  | 8  | 3 | 5 | 124084.3 | 301262.6 | 279735.2 |
| 574.9191 | 32.10983 | 32.09217 | 32.17567 | 4  | 1 | 3 | 82773.45 | 167143.7 | 133853.7 |
| 550.4056 | 10.04334 | 10.02258 | 10.1147  | 6  | 3 | 3 | 107392.1 | 107636.6 | 146950.8 |
| 660.9434 | 18.128   | 18.09117 | 18.16983 | 6  | 2 | 4 | 269851.8 | 917285.9 | 1577075  |
| 454.2652 | 43.60308 | 43.43333 | 43.646   | 6  | 3 | 3 | 175751.8 | 3223955  | 1651989  |
| 551.2742 | 9.225117 | 9.0693   | 9.2722   | 7  | 4 | 3 | 3298439  | 3069658  | 3660243  |
| 384.5532 | 26.88283 | 26.84083 | 26.919   | 5  | 2 | 3 | 45999.29 | 51647.8  | 87424.76 |
| 356.2273 | 9.7175   | 9.671033 | 9.751083 | 6  | 3 | 3 | 1071065  | 1791325  | 1671727  |
| 461.1474 | 31.0665  | 31.00267 | 31.09517 | 5  | 1 | 4 | 112215.6 | 218073.2 | 299942.3 |
| 482.8607 | 44.32892 | 44.30683 | 44.36817 | 10 | 5 | 5 | 372071.1 | 4611959  | 1274985  |
| 493.2365 | 17.60425 | 17.58967 | 17.6205  | 6  | 2 | 4 | 672965.1 | 1701579  | 2550598  |
| 172.723  | 9.463983 | 9.394733 | 9.654717 | 7  | 3 | 4 | 5344785  | 6242544  | 9754871  |
| 280.2641 | 25.86008 | 25.8215  | 25.88917 | 6  | 3 | 3 | 250587.8 | 727896.4 | 909987.9 |
| 311.186  | 20.20567 | 20.16467 | 20.3445  | 7  | 4 | 3 | 368517.5 | 2018272  | 1644590  |
| 1115.104 | 10.67828 | 10.66473 | 10.77118 | 5  | 1 | 4 | 5389360  | 5530896  | 11309488 |
| 416.1395 | 20.94433 | 20.84833 | 21.01983 | 5  | 1 | 4 | 103819   | 396621.4 | 458332.3 |
| 525.4746 | 30.19167 | 30.16417 | 30.23267 | 9  | 5 | 4 | 132732.7 | 672206.9 | 500792   |
| 273.1854 | 30.45083 | 30.36167 | 30.51183 | 10 | 5 | 5 | 567513.4 | 1887965  | 2017103  |
| 697.3566 | 41.20783 | 41.16317 | 41.2225  | 3  | 3 | 0 | 42333.64 | 201638.7 | 129920.4 |
| 407.2796 | 36.59825 | 36.59217 | 36.62033 | 8  | 4 | 4 | 164332.2 | 848698.2 | 788964.3 |
| 338.7802 | 9.490583 | 9.444983 | 9.537367 | 4  | 1 | 3 | 1659112  | 2877581  | 2864175  |
| 769.4115 | 9.540167 | 9.488017 | 9.584433 | 8  | 5 | 3 | 70697992 | 93039429 | 1.48E+08 |
| 278.0595 | 18.13217 | 18.089   | 18.1725  | 5  | 2 | 3 | 164478   | 375760.9 | 518560.6 |
| 554.2183 | 28.40933 | 28.35217 | 28.49317 | 4  | 1 | 3 | 45339.31 | 83720.92 | 114062.5 |

|          |          |          |          |    |   |   |          |          |          |
|----------|----------|----------|----------|----|---|---|----------|----------|----------|
| 340.2851 | 35.06333 | 35.0405  | 35.08833 | 4  | 0 | 4 | 525649.7 | 2397150  | 1830473  |
| 540.4265 | 36.30017 | 36.29117 | 36.45567 | 10 | 5 | 5 | 1916046  | 10376017 | 5495825  |
| 341.1528 | 26.16058 | 26.14117 | 26.17883 | 6  | 2 | 4 | 212185.9 | 629525.5 | 499845.4 |
| 614.2822 | 30.45967 | 30.36167 | 30.52683 | 7  | 4 | 3 | 220725.5 | 820479.6 | 969489   |
| 459.2743 | 43.2335  | 43.15933 | 43.26167 | 7  | 3 | 4 | 111420.8 | 407321.9 | 253384.5 |
| 310.1466 | 35.1615  | 35.15933 | 35.2055  | 5  | 2 | 3 | 45533.45 | 111655.9 | 171314.7 |
| 363.3111 | 39.56008 | 39.48567 | 39.57967 | 10 | 5 | 5 | 1783725  | 10044949 | 9938535  |
| 414.3009 | 30.25917 | 30.24717 | 30.296   | 3  | 0 | 3 | 26637.78 | 62705.01 | 33498.43 |
| 1043.706 | 32.11692 | 32.0855  | 32.20817 | 6  | 3 | 3 | 992408.3 | 2027228  | 3872642  |
| 376.5216 | 9.541492 | 9.49235  | 9.5571   | 4  | 1 | 3 | 5100994  | 5484749  | 11301168 |
| 562.1193 | 23.88408 | 23.8565  | 23.89183 | 6  | 1 | 5 | 171813.9 | 445230.9 | 966586   |
| 311.2948 | 37.4995  | 37.43483 | 37.53033 | 4  | 3 | 1 | 330318.7 | 3401639  | 3405578  |
| 493.1845 | 23.786   | 23.7675  | 23.8115  | 6  | 2 | 4 | 92957.13 | 243528.2 | 320980.2 |
| 818.585  | 37.06383 | 37.0115  | 37.173   | 9  | 4 | 5 | 70428.27 | 349818.4 | 346961   |
| 295.1883 | 32.97683 | 32.86217 | 33.01367 | 7  | 4 | 3 | 665952.4 | 2716923  | 3663498  |
| 358.5801 | 9.483058 | 9.460417 | 9.537367 | 4  | 1 | 3 | 2227541  | 1861975  | 3232308  |
| 608.4743 | 43.86233 | 43.83483 | 43.91333 | 6  | 3 | 3 | 44110.69 | 266202.1 | 82431.94 |
| 426.1367 | 24.03467 | 24.03033 | 24.0625  | 5  | 1 | 4 | 72398.11 | 172086.6 | 328684.7 |
| 391.5075 | 18.93883 | 18.90983 | 18.967   | 9  | 4 | 5 | 79465.78 | 415175   | 415619.4 |
| 941.6711 | 30.29333 | 30.25917 | 30.41917 | 4  | 1 | 3 | 41714.5  | 65104.33 | 14299.9  |
| 222.1209 | 26.308   | 26.23333 | 26.369   | 9  | 4 | 5 | 287384.3 | 904469.2 | 980314.4 |
| 471.2079 | 20.65033 | 20.61683 | 20.9775  | 8  | 3 | 4 | 386486.2 | 386980.3 | 397090.7 |
| 444.1473 | 15.63077 | 15.61248 | 15.65558 | 4  | 1 | 3 | 93992.23 | 270548.1 | 432765.2 |
| 455.1845 | 10.40118 | 10.34782 | 10.42227 | 8  | 4 | 4 | 9204637  | 13848514 | 24958061 |
| 275.6258 | 27.76567 | 27.76017 | 27.83733 | 3  | 0 | 3 | 179324.6 | 575547.9 | 772795.8 |
| 643.2951 | 19.70183 | 19.67333 | 19.765   | 5  | 2 | 3 | 301115.8 | 634954.2 | 1127937  |
| 365.1364 | 28.84267 | 28.70283 | 28.9245  | 10 | 5 | 5 | 1873907  | 11816314 | 15950582 |
| 433.2059 | 11.9058  | 11.88455 | 12.0492  | 7  | 2 | 5 | 254718.4 | 942445.3 | 1145904  |
| 653.4167 | 9.2651   | 9.1639   | 9.3081   | 5  | 3 | 2 | 1303860  | 1411516  | 1308629  |
| 341.1537 | 32.13958 | 32.0875  | 32.19083 | 8  | 3 | 5 | 149352.6 | 542195.8 | 667876.2 |
| 358.0043 | 18.10333 | 18.03083 | 18.13833 | 5  | 1 | 4 | 188319.3 | 554744   | 675768.2 |
| 245.0475 | 21.66425 | 21.557   | 21.71567 | 4  | 3 | 1 | 79853.73 | 198473.5 | 221077   |
| 259.0999 | 18.12058 | 17.985   | 18.1725  | 8  | 3 | 4 | 164458.6 | 517629.8 | 738790.8 |
| 381.2985 | 32.326   | 32.283   | 32.36517 | 6  | 2 | 4 | 189448.6 | 663716.7 | 932206.7 |
| 814.3054 | 22.11867 | 22.05267 | 22.14983 | 6  | 2 | 4 | 320773.4 | 525516.4 | 823550.3 |
| 287.9091 | 13.32787 | 13.23695 | 13.34552 | 5  | 1 | 4 | 543132.6 | 3699654  | 3839087  |
| 623.4504 | 10.03463 | 9.9637   | 10.04445 | 5  | 2 | 3 | 359179.4 | 699069.9 | 792177.3 |
| 613.2782 | 30.45808 | 30.37583 | 30.511   | 8  | 4 | 4 | 621311   | 2370051  | 2960287  |
| 392.0522 | 18.93867 | 18.89467 | 18.95317 | 8  | 3 | 5 | 52702.9  | 215101.6 | 239999.6 |
| 327.0176 | 17.14917 | 17.0515  | 17.18383 | 5  | 1 | 4 | 59602.68 | 221018.6 | 94205.49 |
| 427.026  | 18.13833 | 18.06983 | 18.16983 | 9  | 4 | 5 | 1918917  | 10761915 | 15907506 |
| 419.0302 | 21.13642 | 21.082   | 21.15517 | 4  | 1 | 3 | 86844.66 | 192408.2 | 317688.7 |
| 600.331  | 22.75225 | 22.71633 | 22.78383 | 6  | 3 | 3 | 777059.9 | 1541621  | 2837509  |
| 254.0156 | 12.69562 | 12.59692 | 12.7257  | 4  | 4 | 0 | 72664.71 | 276470.5 | 220175.7 |
| 477.334  | 9.226217 | 9.08515  | 9.435533 | 6  | 4 | 2 | 53569320 | 1.87E+08 | 2.71E+08 |
| 387.0028 | 18.13833 | 18.10567 | 18.158   | 7  | 3 | 4 | 830401.6 | 3625040  | 5411178  |
| 777.4453 | 9.519625 | 9.502483 | 9.55075  | 4  | 0 | 4 | 3382082  | 7934360  | 7888684  |

|          |          |          |          |    |   |   |          |          |          |
|----------|----------|----------|----------|----|---|---|----------|----------|----------|
| 534.3915 | 29.9815  | 29.95767 | 30.002   | 8  | 4 | 4 | 70723.92 | 553834.2 | 108455.6 |
| 567.3873 | 32.5055  | 32.37967 | 32.53617 | 8  | 4 | 4 | 1373112  | 3456616  | 6188934  |
| 521.0965 | 18.10342 | 18.07617 | 18.158   | 6  | 2 | 4 | 683899.3 | 1588101  | 2314896  |
| 228.0531 | 13.72558 | 13.46017 | 13.75177 | 6  | 1 | 3 | 91733.8  | 255727.7 | 419579.5 |
| 304.6553 | 30.2645  | 30.25217 | 30.34733 | 9  | 5 | 4 | 103387.3 | 339950.1 | 345122.3 |
| 556.2129 | 28.37133 | 28.335   | 28.47817 | 9  | 4 | 5 | 1025202  | 2493016  | 3194317  |
| 936.6485 | 33.78792 | 33.76533 | 33.811   | 8  | 3 | 5 | 127120   | 547306.1 | 656757.3 |
| 562.3746 | 22.54708 | 22.49    | 22.57533 | 10 | 5 | 5 | 2443230  | 7633270  | 9689909  |
| 494.9351 | 25.689   | 25.67733 | 25.69883 | 5  | 1 | 4 | 48462.96 | 105573.6 | 234510.8 |
| 301.9971 | 13.30095 | 13.18293 | 13.37392 | 4  | 1 | 3 | 121955.1 | 385976.9 | 660573.6 |
| 532.9264 | 22.99625 | 22.87217 | 23.01883 | 8  | 2 | 5 | 375718.2 | 860471.4 | 1660259  |
| 199.097  | 18.13975 | 18.01233 | 18.1595  | 10 | 5 | 5 | 1094679  | 6820513  | 7251489  |
| 322.2594 | 19.52583 | 19.50233 | 19.541   | 7  | 3 | 4 | 130174.9 | 355940.9 | 465786.5 |
| 474.0277 | 22.98233 | 22.943   | 23.01883 | 10 | 5 | 5 | 5450367  | 18556075 | 26909380 |
| 280.518  | 30.8495  | 30.73283 | 30.89783 | 10 | 5 | 5 | 272470.1 | 1349876  | 1333753  |
| 586.9087 | 33.48858 | 33.42917 | 33.52067 | 4  | 1 | 3 | 60476.76 | 161304.2 | 197202.7 |
| 385.9994 | 18.1415  | 18.06983 | 18.18483 | 10 | 5 | 5 | 6183412  | 38878363 | 56687061 |
| 420.0494 | 21.67933 | 21.60133 | 21.7275  | 7  | 2 | 5 | 254087.5 | 614268.3 | 845841.9 |
| 676.3881 | 9.558733 | 9.44975  | 9.565117 | 5  | 3 | 2 | 2395755  | 3250793  | 4528934  |
| 420.3325 | 39.74742 | 39.64917 | 39.77817 | 10 | 5 | 5 | 586418.4 | 4737980  | 2243129  |
| 451.0871 | 28.95767 | 28.95033 | 28.97417 | 3  | 0 | 3 | 37032.1  | 76275.05 | 93721.57 |
| 304.2486 | 33.46175 | 33.40883 | 33.5045  | 10 | 5 | 5 | 2289282  | 13062413 | 12469298 |
| 454.1421 | 9.121667 | 9.100467 | 9.243133 | 3  | 3 | 0 | 2521205  | 2068584  | 3426545  |
| 254.0842 | 18.76033 | 18.73683 | 18.81833 | 5  | 2 | 3 | 162614.9 | 695321.5 | 850052.9 |
| 322.2955 | 31.63525 | 31.59783 | 31.6595  | 8  | 4 | 4 | 264079.6 | 1152812  | 1222889  |
| 421.3071 | 22.0495  | 21.81517 | 22.1075  | 7  | 3 | 4 | 143129.7 | 380270.4 | 513066.9 |
| 266.2483 | 17.6005  | 17.5895  | 17.63133 | 10 | 5 | 5 | 1024655  | 4809557  | 4670982  |
| 228.5981 | 10.43778 | 10.36523 | 10.7506  | 10 | 4 | 5 | 10322009 | 17442305 | 33188800 |
| 364.3062 | 39.99683 | 39.95183 | 40.015   | 5  | 3 | 2 | 424064.6 | 1921246  | 2015040  |
| 582.4225 | 24.37483 | 24.32533 | 24.45017 | 6  | 2 | 4 | 104384.7 | 629238.9 | 772115   |
| 348.218  | 20.54    | 20.48283 | 21.00683 | 11 | 5 | 4 | 815565.9 | 859674.6 | 805825.4 |
| 711.9716 | 9.540167 | 9.460417 | 9.584433 | 4  | 3 | 1 | 3304031  | 5398929  | 3856464  |
| 205.0161 | 21.69383 | 21.5865  | 21.7275  | 6  | 2 | 4 | 149974.7 | 479838.3 | 578620.7 |
| 609.9392 | 38.51958 | 38.4235  | 38.5445  | 4  | 0 | 4 | 47937.37 | 107118.9 | 100441.9 |
| 382.3169 | 21.51508 | 21.4125  | 21.53717 | 6  | 1 | 5 | 233998.2 | 1407931  | 1866412  |
| 378.3301 | 37.95933 | 37.8165  | 38.08317 | 3  | 0 | 3 | 25608.37 | 40302.44 | 46408.58 |
| 165.0548 | 28.14717 | 28.10267 | 28.1765  | 5  | 3 | 2 | 53564.48 | 230148   | 83864.97 |
| 402.2904 | 34.06033 | 34.05067 | 34.06833 | 5  | 2 | 3 | 99174.95 | 294873.9 | 196784.7 |
| 559.385  | 29.947   | 29.9205  | 29.97683 | 10 | 5 | 5 | 158863   | 1637479  | 216422.8 |
| 546.4638 | 20.04883 | 20.04033 | 20.20517 | 5  | 2 | 3 | 87168.17 | 207879.2 | 236479   |
| 631.2593 | 10.70707 | 10.63273 | 10.75237 | 5  | 0 | 5 | 923271.1 | 1548072  | 1970426  |
| 256.1629 | 16.69    | 16.65583 | 16.724   | 10 | 5 | 5 | 481412.5 | 2733869  | 2909140  |
| 356.2076 | 32.07333 | 32.05783 | 32.1315  | 3  | 0 | 3 | 49809.7  | 83069.83 | 132506.9 |
| 430.2881 | 21.25817 | 21.1695  | 21.29767 | 9  | 4 | 5 | 299813.1 | 763274.7 | 1243787  |
| 468.1369 | 18.14    | 18.01233 | 18.16117 | 7  | 3 | 4 | 97708.5  | 311661.5 | 389826.6 |
| 696.1347 | 9.500283 | 9.473767 | 9.5558   | 7  | 3 | 4 | 5285952  | 15890134 | 22801377 |
| 398.3253 | 7.210433 | 7.09035  | 7.271517 | 5  | 2 | 3 | 2194792  | 803916.1 | 1481289  |



|          |          |          |          |    |   |   |          |          |          |
|----------|----------|----------|----------|----|---|---|----------|----------|----------|
| 500.104  | 18.08433 | 18.07167 | 18.17383 | 5  | 2 | 3 | 202650.5 | 283406.8 | 358821.9 |
| 974.4517 | 10.69325 | 10.67828 | 10.74052 | 3  | 0 | 3 | 1002619  | 1229952  | 2452141  |
| 394.2495 | 20.47867 | 20.47467 | 20.59983 | 3  | 0 | 3 | 102181.6 | 164418.5 | 117737.7 |
| 337.2035 | 16.53952 | 16.53025 | 16.58867 | 6  | 2 | 4 | 501289.7 | 1271722  | 1636981  |
| 619.4806 | 17.20708 | 17.1625  | 17.25317 | 10 | 5 | 5 | 10762998 | 59843289 | 42574284 |
| 835.5844 | 31.81283 | 31.805   | 31.84417 | 7  | 3 | 4 | 102066.9 | 388661.5 | 468561.5 |
| 571.9575 | 22.99133 | 22.9685  | 23.01883 | 7  | 2 | 5 | 250951.9 | 485063.4 | 902506.3 |
| 385.4871 | 9.684133 | 9.61695  | 9.751083 | 9  | 5 | 4 | 494811.2 | 645798.6 | 569690.4 |
| 446.0573 | 32.13233 | 32.044   | 32.17517 | 4  | 1 | 3 | 42381.29 | 107397.1 | 128715.3 |
| 330.1157 | 26.96967 | 26.94683 | 26.99917 | 5  | 2 | 3 | 32253.6  | 75020.93 | 109330.6 |
| 793.1017 | 10.60532 | 10.43785 | 10.66553 | 8  | 5 | 3 | 1259571  | 1290931  | 1390353  |
| 332.7813 | 9.518825 | 9.47815  | 9.545617 | 4  | 1 | 3 | 36812772 | 34939242 | 57062587 |
| 340.2604 | 10.95518 | 10.87913 | 10.99405 | 3  | 0 | 3 | 2932208  | 6783635  | 5423475  |
| 384.0037 | 15.90692 | 15.83023 | 15.92517 | 5  | 1 | 4 | 174146   | 693545.7 | 1374885  |
| 446.0567 | 26.18158 | 26.16633 | 26.19367 | 4  | 1 | 3 | 52885.76 | 127986.4 | 82838.47 |
| 325.2016 | 25.25508 | 25.21    | 25.28633 | 6  | 2 | 4 | 287547.1 | 1478404  | 1336096  |
| 610.2907 | 10.67897 | 10.63273 | 10.75237 | 7  | 2 | 5 | 12118991 | 17774585 | 35442623 |
| 246.0821 | 17.11925 | 17.0515  | 17.1625  | 6  | 3 | 3 | 115526   | 430604.1 | 450353.2 |
| 580.2131 | 28.39517 | 28.34517 | 28.46317 | 7  | 3 | 4 | 280015.3 | 696307   | 930851.8 |
| 515.0122 | 18.11767 | 18.1035  | 18.18667 | 5  | 2 | 3 | 185257.3 | 491496.3 | 851007.8 |
| 513.9921 | 32.13533 | 32.0295  | 32.173   | 5  | 1 | 4 | 60131.34 | 94146.6  | 207584.5 |
| 373.7244 | 9.537367 | 9.47815  | 9.584433 | 9  | 5 | 4 | 14308447 | 22452663 | 22387673 |
| 335.1625 | 32.1255  | 32.0875  | 32.14983 | 6  | 1 | 5 | 146859.6 | 505512.5 | 525439.6 |
| 262.0165 | 11.5731  | 11.3126  | 11.71572 | 4  | 0 | 3 | 52899.14 | 107537.4 | 186866.9 |
| 713.462  | 43.42567 | 43.29183 | 43.4645  | 7  | 4 | 3 | 79154.48 | 358633.7 | 350199.8 |
| 224.0202 | 15.55713 | 15.40755 | 15.66645 | 9  | 4 | 5 | 156707.9 | 1190363  | 1281438  |
| 262.1134 | 12.97667 | 12.85795 | 13.0366  | 6  | 4 | 2 | 1151637  | 1044324  | 1276783  |
| 702.4991 | 9.5025   | 9.463983 | 9.596683 | 9  | 5 | 4 | 8.63E+08 | 2.09E+09 | 2.79E+09 |
| 500.3799 | 13.97497 | 13.82875 | 14.06478 | 6  | 1 | 4 | 107936.6 | 784848.2 | 909592.7 |
| 380.2285 | 43.60467 | 43.55817 | 43.64533 | 5  | 1 | 4 | 243420.8 | 5265720  | 1037939  |
| 608.2659 | 29.79417 | 29.77283 | 29.89933 | 6  | 2 | 4 | 101219.4 | 312572.4 | 220677.3 |
| 315.572  | 19.36883 | 19.32383 | 19.38567 | 6  | 2 | 4 | 34808.08 | 97035.37 | 128504.9 |
| 311.1624 | 32.4975  | 32.37967 | 32.53617 | 9  | 5 | 4 | 425666.9 | 1197243  | 1880582  |
| 296.1915 | 32.51217 | 32.39533 | 32.54567 | 9  | 5 | 4 | 719875.1 | 2113177  | 3424961  |
| 314.6495 | 32.74017 | 32.678   | 32.894   | 4  | 1 | 3 | 28125.78 | 38623.22 | 62932.7  |
| 282.2797 | 15.29043 | 15.23665 | 15.37675 | 9  | 4 | 5 | 252573.5 | 1154821  | 1409889  |
| 647.0228 | 33.17183 | 33.15433 | 33.21583 | 3  | 0 | 3 | 74494.8  | 561749.4 | 116642.5 |
| 295.2469 | 12.78497 | 12.77257 | 12.8356  | 5  | 2 | 3 | 90192.33 | 159615.6 | 128407.3 |
| 539.1015 | 22.10733 | 22.05267 | 22.12717 | 4  | 1 | 3 | 104799.1 | 248199.7 | 289827.2 |
| 852.6406 | 35.04083 | 35.002   | 35.12933 | 9  | 5 | 4 | 66051.64 | 483453.6 | 270722.3 |
| 178.9463 | 15.27613 | 15.21732 | 15.48917 | 3  | 0 | 3 | 4687924  | 13686903 | 19212759 |
| 540.4494 | 9.733967 | 9.6898   | 9.7788   | 9  | 5 | 4 | 5215849  | 5892793  | 9142968  |
| 599.3272 | 22.75433 | 22.70783 | 22.78383 | 9  | 5 | 4 | 2739620  | 5982210  | 11254820 |
| 353.0097 | 16.95508 | 16.893   | 16.99967 | 6  | 3 | 3 | 52981.73 | 162689   | 228604.2 |
| 639.2633 | 29.215   | 29.2     | 29.26    | 5  | 4 | 1 | 112523.3 | 391941   | 483521.9 |
| 312.2176 | 20.7285  | 20.7015  | 20.74433 | 4  | 1 | 3 | 119504.9 | 316671.5 | 229493   |
| 383.2123 | 9.517242 | 9.49235  | 9.5558   | 4  | 1 | 3 | 6446816  | 13832128 | 18486190 |

|          |          |          |          |    |   |   |          |          |          |
|----------|----------|----------|----------|----|---|---|----------|----------|----------|
| 666.297  | 22.1215  | 22.1015  | 22.1365  | 5  | 2 | 3 | 338259.8 | 638951.2 | 972528.8 |
| 456.1883 | 24.32308 | 24.2525  | 24.40183 | 6  | 2 | 3 | 56882.42 | 158760.7 | 179257.8 |
| 436.9136 | 18.1655  | 18.10883 | 18.20533 | 4  | 1 | 3 | 43663.54 | 103079.7 | 154740.3 |
| 226.0879 | 26.65017 | 26.601   | 26.67933 | 7  | 2 | 5 | 246446.1 | 569042.3 | 759449.7 |
| 517.133  | 27.16925 | 27.12633 | 27.215   | 10 | 5 | 5 | 1056122  | 3531982  | 4864259  |
| 453.1678 | 23.17692 | 23.09983 | 23.21    | 10 | 5 | 5 | 451196.6 | 1809142  | 1583952  |
| 430.9154 | 16.9135  | 16.86417 | 16.96167 | 4  | 1 | 3 | 37672.11 | 128034.7 | 49094.66 |
| 196.5219 | 19.3495  | 19.25617 | 19.38317 | 5  | 2 | 3 | 44056.55 | 122713   | 71640.88 |
| 358.7172 | 9.537367 | 9.4881   | 9.837617 | 9  | 4 | 4 | 15325971 | 33581257 | 57179539 |
| 395.2265 | 11.28918 | 11.24107 | 11.29943 | 5  | 3 | 2 | 987508.8 | 2005190  | 3888357  |
| 440.5262 | 29.8025  | 29.76717 | 29.827   | 4  | 1 | 3 | 34350.73 | 51028.97 | 109624.1 |
| 316.2123 | 8.76     | 8.551733 | 8.905933 | 6  | 4 | 2 | 4286361  | 42202595 | 23015424 |
| 305.239  | 38.8975  | 38.86367 | 38.927   | 3  | 0 | 3 | 367428.8 | 1072473  | 1261620  |
| 502.1933 | 10.40118 | 10.34782 | 10.42227 | 8  | 4 | 4 | 10631235 | 14651934 | 28692137 |
| 377.1163 | 19.5845  | 19.54683 | 19.61483 | 3  | 0 | 3 | 155895.2 | 570400   | 867726.4 |
| 572.3796 | 18.71283 | 18.67017 | 18.73683 | 8  | 3 | 5 | 94266.48 | 258460.3 | 419955   |
| 645.0078 | 31.34333 | 31.31433 | 31.36017 | 3  | 0 | 3 | 149651.7 | 509437.5 | 1117399  |
| 534.2555 | 18.92383 | 18.86433 | 18.93883 | 9  | 5 | 4 | 88201.04 | 295989   | 308704.3 |
| 781.6428 | 9.522017 | 9.460417 | 9.545617 | 4  | 1 | 3 | 2624521  | 2462297  | 5302456  |
| 738.4274 | 41.19317 | 41.16333 | 41.25083 | 9  | 4 | 5 | 202905.9 | 1123365  | 713495.3 |
| 813.3015 | 22.12592 | 22.03667 | 22.14983 | 6  | 2 | 4 | 666589.4 | 1340265  | 2034126  |
| 720.4092 | 17.2225  | 17.153   | 17.2395  | 5  | 1 | 4 | 82361.16 | 168942.1 | 271299.7 |
| 359.7362 | 9.519925 | 9.474117 | 9.596683 | 8  | 5 | 3 | 11409418 | 31331056 | 29535747 |
| 766.1962 | 29.149   | 29.1255  | 29.2115  | 5  | 1 | 4 | 105503.5 | 348756.7 | 309428.7 |
| 256.0036 | 31.00108 | 30.96383 | 31.0595  | 4  | 1 | 3 | 47520.32 | 78336.05 | 158337.4 |
| 230.0238 | 21.68167 | 21.66517 | 21.71567 | 5  | 3 | 2 | 178853.8 | 508279.2 | 623837.7 |
| 268.083  | 30.80633 | 30.7045  | 30.8525  | 9  | 4 | 5 | 413564.8 | 1840184  | 1741754  |
| 363.5942 | 29.1535  | 29.14083 | 29.19117 | 3  | 0 | 3 | 70392.52 | 76465.01 | 167441.2 |
| 277.7319 | 9.5571   | 9.500283 | 9.572217 | 5  | 3 | 2 | 2714047  | 5319997  | 5265328  |
| 473.3451 | 34.70975 | 34.68833 | 34.71883 | 6  | 2 | 4 | 231529.4 | 270446.5 | 267895.2 |
| 376.3984 | 9.490217 | 9.460417 | 9.537367 | 4  | 1 | 3 | 4361030  | 3797340  | 6231835  |
| 296.1941 | 23.80217 | 23.73983 | 23.84167 | 5  | 4 | 1 | 153596.5 | 489970.3 | 626331.3 |
| 326.1608 | 42.44225 | 42.37333 | 42.51133 | 8  | 4 | 4 | 81622.36 | 523567.1 | 447469.7 |
| 472.0324 | 22.99917 | 22.97417 | 23.01883 | 7  | 2 | 5 | 254243.9 | 739687.5 | 1120988  |
| 461.2688 | 36.4245  | 36.407   | 36.47133 | 3  | 0 | 3 | 27834.39 | 81546.58 | 25704.33 |
| 658.2378 | 29.14083 | 29.09717 | 29.2115  | 5  | 3 | 2 | 229042.2 | 247945.1 | 383165.5 |
| 327.1997 | 23.11458 | 23.0165  | 23.12483 | 6  | 2 | 4 | 106095.5 | 380566.7 | 333652.8 |
| 739.4313 | 41.20783 | 41.13333 | 41.23733 | 8  | 4 | 4 | 88922.98 | 403192.7 | 298163.6 |
| 327.1321 | 22.75375 | 22.70783 | 22.78383 | 8  | 4 | 4 | 322523.3 | 1046861  | 1319472  |
| 819.4775 | 29.64442 | 29.57833 | 29.681   | 4  | 3 | 1 | 388402.5 | 810624.6 | 1616199  |
| 377.8245 | 9.47815  | 9.444983 | 9.537367 | 3  | 0 | 3 | 8012770  | 6513543  | 13784157 |
| 338.2241 | 37.53517 | 37.4705  | 37.56533 | 4  | 0 | 4 | 53170.06 | 314413.9 | 119700.4 |
| 428.7261 | 10.40805 | 10.34782 | 10.44485 | 7  | 2 | 5 | 10463512 | 15908693 | 26851504 |
| 333.1738 | 16.68817 | 16.66133 | 16.69967 | 6  | 2 | 4 | 271709.7 | 515929   | 640104.9 |
| 330.2148 | 32.70317 | 32.6365  | 32.73083 | 7  | 3 | 4 | 165755.4 | 809385.7 | 856779.1 |
| 233.1112 | 14.78578 | 14.71445 | 15.08275 | 11 | 5 | 5 | 971573.3 | 4002544  | 5296407  |
| 598.7615 | 29.21333 | 29.15517 | 29.29983 | 6  | 2 | 4 | 352279.1 | 825153.5 | 1448854  |

|          |          |          |          |    |   |   |          |          |          |
|----------|----------|----------|----------|----|---|---|----------|----------|----------|
| 267.1724 | 27.13167 | 27.08717 | 27.19183 | 10 | 5 | 5 | 5944670  | 30333796 | 35369184 |
| 703.1762 | 22.142   | 22.05267 | 22.15067 | 5  | 2 | 3 | 329717.2 | 764405.7 | 1056727  |
| 298.1316 | 32.13917 | 32.0875  | 32.1585  | 6  | 1 | 5 | 87462.5  | 211696.1 | 357582.2 |
| 282.1156 | 28.97267 | 28.95033 | 28.98033 | 7  | 2 | 5 | 286893.9 | 667543   | 1110936  |
| 282.2797 | 39.465   | 39.223   | 39.54983 | 11 | 5 | 5 | 634989.9 | 4803665  | 5064234  |
| 441.3443 | 10.03438 | 9.94255  | 10.05278 | 6  | 4 | 2 | 1279509  | 1956534  | 2877758  |
| 497.3882 | 35.75383 | 35.72383 | 35.785   | 9  | 4 | 5 | 194469.1 | 895932.3 | 1010749  |
| 395.0011 | 21.708   | 21.6855  | 21.72567 | 7  | 3 | 4 | 132809.6 | 731042.4 | 857552.2 |
| 250.2098 | 14.53196 | 14.46898 | 14.58152 | 8  | 3 | 5 | 125597.4 | 710195.6 | 804901.3 |
| 212.4264 | 9.52075  | 9.502483 | 9.537367 | 3  | 0 | 3 | 3654970  | 5271600  | 10797267 |
| 371.0634 | 31.32358 | 31.301   | 31.34333 | 4  | 0 | 4 | 447311.3 | 1150830  | 2057549  |
| 491.3616 | 29.02458 | 29.00517 | 29.1375  | 8  | 4 | 4 | 106338.1 | 487698.2 | 569419.8 |
| 274.6258 | 26.67458 | 26.63917 | 26.98233 | 8  | 2 | 4 | 376285.1 | 1472487  | 2237431  |
| 443.1702 | 9.678275 | 9.435533 | 9.939067 | 8  | 3 | 3 | 8942006  | 13889329 | 23381581 |
| 350.7553 | 21.8135  | 21.64633 | 21.83617 | 5  | 2 | 3 | 53993.04 | 98422.01 | 145054   |
| 608.3638 | 25.04083 | 24.9975  | 25.06317 | 5  | 2 | 3 | 90986.55 | 255307.7 | 189352   |
| 202.1074 | 8.821183 | 8.730367 | 8.94765  | 5  | 3 | 2 | 128026.2 | 596431.6 | 435764.5 |
| 316.1995 | 14.02403 | 13.91735 | 14.144   | 8  | 4 | 4 | 139005.2 | 578418   | 651208.9 |
| 305.269  | 31.63417 | 31.612   | 31.6625  | 9  | 5 | 4 | 341077.9 | 1404318  | 1516679  |
| 491.3287 | 11.73803 | 11.72045 | 11.74298 | 4  | 1 | 3 | 66390.22 | 139236.9 | 108614.2 |
| 257.0597 | 11.06731 | 10.85075 | 11.09677 | 6  | 3 | 3 | 175509.3 | 581668.8 | 960670   |
| 539.4031 | 12.04908 | 12.0203  | 12.2138  | 8  | 4 | 4 | 92373.57 | 264452.3 | 258252   |
| 626.2914 | 32.72958 | 32.708   | 32.83033 | 8  | 3 | 5 | 214146.4 | 748529.9 | 880349.7 |
| 332.472  | 21.01067 | 20.9345  | 21.03617 | 6  | 3 | 3 | 35630.29 | 87411.55 | 113549.1 |
| 355.2262 | 19.806   | 19.79    | 19.887   | 4  | 1 | 3 | 25768.12 | 90665.18 | 69813.05 |
| 570.2719 | 9.221592 | 9.163733 | 9.266617 | 6  | 4 | 2 | 1370913  | 1442098  | 1404388  |
| 505.3793 | 30.4565  | 30.41283 | 30.48633 | 7  | 3 | 4 | 160515.6 | 284243.9 | 358929.5 |
| 361.3301 | 19.29067 | 19.27917 | 19.30917 | 7  | 3 | 4 | 65549.62 | 160449.2 | 189881.6 |
| 428.3529 | 31.61592 | 31.542   | 31.70567 | 6  | 3 | 3 | 89679.63 | 303049.7 | 349323.2 |
| 610.2483 | 29.2075  | 29.06817 | 29.24117 | 6  | 4 | 2 | 161062.2 | 705718.9 | 520672.5 |
| 638.4103 | 43.60183 | 43.57217 | 43.62017 | 3  | 3 | 0 | 67094.35 | 562616.3 | 138998.3 |
| 660.9778 | 20.64217 | 20.58467 | 20.7515  | 5  | 2 | 3 | 56801.18 | 96630.81 | 124564.2 |
| 488.1735 | 13.02823 | 13.00105 | 13.05133 | 4  | 1 | 3 | 311976   | 783716   | 1564608  |
| 506.1667 | 14.00334 | 13.97622 | 14.04275 | 4  | 1 | 3 | 179828.1 | 459200.4 | 846827.2 |
| 396.5972 | 18.93842 | 18.90983 | 18.967   | 8  | 3 | 5 | 53317.31 | 205404.9 | 237317.5 |
| 295.1908 | 23.82683 | 23.71633 | 23.85583 | 9  | 5 | 4 | 1087342  | 4020838  | 4520582  |
| 672.5026 | 34.30692 | 34.13417 | 34.32567 | 6  | 1 | 4 | 125310.7 | 212925.2 | 245513.5 |
| 452.1721 | 26.65383 | 26.601   | 26.67933 | 7  | 2 | 5 | 171732.3 | 1046083  | 466981.6 |
| 371.3273 | 25.17525 | 25.14933 | 25.26    | 10 | 5 | 5 | 142274.7 | 496365.7 | 445134   |
| 626.2837 | 30.29    | 30.18683 | 30.31867 | 5  | 2 | 3 | 72461.55 | 177263.7 | 80427.88 |
| 544.0617 | 19.6915  | 19.6445  | 19.7185  | 7  | 3 | 4 | 176613.7 | 386796.4 | 643029.3 |
| 730.2009 | 32.1095  | 32.05683 | 32.20633 | 10 | 5 | 5 | 206836   | 1563675  | 1151254  |
| 515.137  | 21.50583 | 21.48717 | 21.52233 | 6  | 2 | 4 | 888472.2 | 1422787  | 1968422  |
| 593.3884 | 10.09363 | 10.04878 | 10.1429  | 4  | 3 | 1 | 4499735  | 6322947  | 10084728 |
| 254.2486 | 11.13961 | 11.12325 | 11.16482 | 6  | 2 | 4 | 67230.69 | 109798   | 145423   |
| 712.4793 | 35.329   | 35.29567 | 35.3705  | 9  | 5 | 4 | 148529.9 | 353703   | 431885.4 |
| 611.2366 | 10.72217 | 10.68362 | 11.01127 | 7  | 2 | 4 | 9182726  | 14080757 | 29662405 |

|          |          |          |          |    |   |   |          |          |          |
|----------|----------|----------|----------|----|---|---|----------|----------|----------|
| 624.7976 | 10.87202 | 10.86477 | 10.88395 | 4  | 1 | 3 | 91029.77 | 77081.32 | 145700.4 |
| 562.1233 | 18.12917 | 18.09117 | 18.158   | 4  | 1 | 3 | 113857.9 | 271469.5 | 403001.6 |
| 564.8953 | 33.50775 | 33.3915  | 33.58283 | 6  | 3 | 3 | 94525.83 | 268978.4 | 317689.6 |
| 396.2668 | 21.45825 | 21.35633 | 21.52233 | 4  | 1 | 3 | 59007.29 | 111807.4 | 122672   |
| 339.1014 | 28.6435  | 28.598   | 28.66667 | 4  | 1 | 3 | 40678.58 | 137221.8 | 65519.57 |
| 267.2517 | 18.93842 | 18.92367 | 18.96767 | 10 | 5 | 5 | 305139.4 | 1346753  | 1330905  |
| 317.1054 | 20.43833 | 20.4115  | 20.56367 | 7  | 3 | 4 | 3593566  | 12195920 | 17025758 |
| 400.3213 | 33.99575 | 33.966   | 34.02433 | 6  | 3 | 3 | 350437.4 | 1564313  | 2161763  |
| 486.3564 | 29.62508 | 29.57833 | 29.68167 | 8  | 4 | 4 | 152466.3 | 638104.5 | 640015.2 |
| 610.7923 | 10.67149 | 10.62815 | 10.75237 | 8  | 3 | 5 | 8498367  | 12798566 | 26522134 |
| 408.9885 | 21.68942 | 21.66433 | 21.71283 | 6  | 2 | 4 | 212224   | 653401.6 | 911310.5 |
| 322.2859 | 14.49297 | 14.2379  | 14.5373  | 7  | 2 | 4 | 378937.2 | 1441530  | 1801269  |
| 272.1864 | 18.11942 | 18.02683 | 18.1595  | 10 | 5 | 5 | 1387225  | 8277715  | 9091958  |
| 658.469  | 23.17983 | 23.133   | 23.196   | 7  | 3 | 4 | 240264.6 | 323014.9 | 441345.7 |
| 368.2251 | 9.5571   | 9.4881   | 9.85235  | 9  | 4 | 4 | 2.65E+08 | 5.55E+08 | 1E+09    |
| 330.2279 | 23.82875 | 23.71633 | 23.85583 | 10 | 5 | 5 | 1131115  | 3551321  | 4435204  |
| 563.1617 | 21.69392 | 21.57183 | 21.7275  | 6  | 2 | 4 | 314194.1 | 466922.5 | 640595.9 |
| 380.3375 | 39.55608 | 39.48567 | 39.60733 | 8  | 4 | 4 | 192448.9 | 912025.4 | 909444.2 |
| 730.4631 | 40.65242 | 40.62583 | 40.67817 | 6  | 3 | 3 | 27627.77 | 182761.4 | 96290.82 |
| 341.7658 | 9.5558   | 9.47815  | 9.617567 | 7  | 4 | 3 | 8457062  | 12603560 | 11548035 |
| 372.2747 | 24.05183 | 24.04667 | 24.109   | 3  | 3 | 0 | 250080.9 | 1066826  | 803382.2 |
| 1577.025 | 9.522017 | 9.473767 | 9.5571   | 4  | 1 | 3 | 2462352  | 3671015  | 7903727  |
| 358.2155 | 9.553275 | 9.4881   | 9.584433 | 8  | 5 | 3 | 43105568 | 99045285 | 1.71E+08 |
| 299.626  | 26.86958 | 26.849   | 26.919   | 6  | 2 | 4 | 82456.78 | 193291   | 260247.3 |
| 352.1211 | 20.941   | 20.905   | 21.00533 | 6  | 2 | 4 | 100382.6 | 184303.3 | 287368.1 |
| 394.2316 | 8.905375 | 8.7127   | 8.9755   | 4  | 3 | 1 | 1149008  | 2033173  | 2944837  |
| 382.2943 | 10.08403 | 10.0041  | 10.12872 | 6  | 2 | 4 | 334570.9 | 680501.2 | 899788.5 |
| 540.4111 | 35.46825 | 35.42017 | 35.50117 | 10 | 5 | 5 | 1567479  | 8458013  | 9466656  |
| 306.275  | 22.98833 | 22.97483 | 23.0585  | 3  | 0 | 3 | 43257760 | 1.58E+08 | 1.69E+08 |
| 382.311  | 39.5105  | 39.4565  | 39.53067 | 6  | 3 | 3 | 419130   | 1369940  | 2306548  |
| 515.1367 | 22.76108 | 22.74667 | 22.77767 | 4  | 1 | 3 | 385889.6 | 1150793  | 1662817  |
| 765.4312 | 24.84417 | 24.824   | 24.86083 | 3  | 0 | 3 | 39351.51 | 42372.95 | 61602.82 |
| 1107.117 | 10.66553 | 10.6177  | 10.67828 | 5  | 2 | 3 | 856601.3 | 709395.8 | 1252056  |
| 261.1101 | 12.30735 | 12.2709  | 12.4731  | 5  | 2 | 3 | 2400115  | 4028668  | 4451991  |
| 312.1811 | 15.02647 | 14.97753 | 15.09133 | 7  | 3 | 4 | 85720.8  | 326539.5 | 421720.4 |
| 365.1868 | 9.534967 | 9.4881   | 9.5558   | 5  | 1 | 4 | 5470685  | 7672262  | 12682530 |
| 376.2141 | 16.969   | 16.96183 | 17.00117 | 4  | 1 | 3 | 75308.92 | 322250.9 | 151805.1 |
| 615.1673 | 25.95217 | 25.931   | 25.976   | 4  | 1 | 3 | 47177.92 | 67821.54 | 123224.6 |
| 285.2217 | 36.78467 | 36.77217 | 36.8095  | 7  | 3 | 4 | 199443.3 | 2531681  | 2858909  |
| 185.081  | 31.07333 | 30.97417 | 31.1105  | 4  | 1 | 3 | 59644.81 | 361223.8 | 130634.3 |
| 343.7013 | 8.82215  | 8.58785  | 8.919867 | 6  | 4 | 2 | 120811.7 | 277228.5 | 301848.3 |
| 746.1916 | 29.228   | 29.16333 | 29.32917 | 6  | 1 | 5 | 242915.7 | 658943.5 | 1086879  |
| 451.0325 | 22.09967 | 22.08617 | 22.1215  | 6  | 3 | 3 | 109272.8 | 464636.7 | 524096   |
| 642.4337 | 16.60609 | 16.55567 | 16.63332 | 6  | 2 | 4 | 42403.87 | 113864.5 | 72641.02 |
| 525.4253 | 19.85025 | 19.83417 | 19.99017 | 6  | 2 | 4 | 58366.55 | 156027.4 | 179958.3 |
| 1116.105 | 10.66922 | 10.599   | 10.77118 | 5  | 1 | 4 | 3509467  | 3411177  | 7027440  |
| 474.2601 | 23.1115  | 23.09983 | 23.1535  | 4  | 4 | 0 | 36808.92 | 139053.3 | 63071.05 |

|          |          |          |          |    |   |   |          |          |          |
|----------|----------|----------|----------|----|---|---|----------|----------|----------|
| 568.2343 | 26.22575 | 26.173   | 26.30383 | 10 | 5 | 5 | 791422.7 | 2673786  | 3277646  |
| 440.41   | 35.16183 | 35.147   | 35.21983 | 10 | 5 | 5 | 28469580 | 1.36E+08 | 90968249 |
| 766.4588 | 41.20783 | 41.178   | 41.23617 | 9  | 4 | 5 | 130980.9 | 643527.3 | 441670.7 |
| 732.9074 | 26.66483 | 26.59933 | 26.69733 | 7  | 2 | 4 | 73192.36 | 114559.4 | 163632   |
| 937.6523 | 33.79542 | 33.77133 | 33.81983 | 6  | 3 | 3 | 63505.11 | 238574.7 | 303158.3 |
| 385.0021 | 15.8805  | 15.85927 | 15.92517 | 5  | 1 | 4 | 74311.55 | 278477.5 | 521143.7 |
| 390.137  | 27.35433 | 27.271   | 27.3885  | 6  | 2 | 4 | 88602.58 | 274299.5 | 332073.3 |
| 348.2344 | 11.64615 | 11.62662 | 11.6697  | 5  | 3 | 2 | 133051.7 | 322823.6 | 383366.6 |
| 445.259  | 33.54    | 33.50883 | 33.54917 | 5  | 3 | 2 | 119360.4 | 471178.9 | 670858.2 |
| 512.4339 | 34.61558 | 34.5525  | 34.63667 | 4  | 1 | 3 | 2728252  | 5566403  | 8214481  |
| 354.0064 | 22.98917 | 22.96517 | 23.01883 | 7  | 2 | 5 | 234822.4 | 657501   | 984321.5 |
| 420.1108 | 15.466   | 15.45395 | 15.48917 | 3  | 0 | 3 | 55629.02 | 119785.5 | 194922   |
| 315.0796 | 19.35933 | 19.29933 | 19.37867 | 5  | 2 | 3 | 70925.19 | 158816.8 | 250154.4 |
| 433.3321 | 22.28942 | 22.262   | 22.37033 | 8  | 3 | 5 | 113780.2 | 457648   | 394567.3 |
| 253.1953 | 20.98083 | 20.935   | 21.00683 | 6  | 3 | 3 | 161632.7 | 601747.3 | 619626.3 |
| 341.7325 | 9.52075  | 9.472433 | 9.55215  | 5  | 2 | 3 | 1693465  | 2900466  | 3834018  |
| 622.2713 | 22.13158 | 22.05267 | 22.14983 | 6  | 2 | 4 | 729781.9 | 1481212  | 2032661  |
| 314.0147 | 15.59293 | 15.48072 | 15.65342 | 4  | 1 | 3 | 60563.04 | 194318.5 | 367839.4 |
| 371.2583 | 44.9745  | 44.91517 | 44.975   | 7  | 4 | 3 | 232784.5 | 932414.6 | 844794.1 |
| 598.3883 | 33.96525 | 33.935   | 34.07833 | 6  | 3 | 3 | 59829.52 | 167141.8 | 230103.2 |
| 662.9923 | 21.02133 | 21.0085  | 21.0485  | 3  | 0 | 3 | 129478.8 | 525266.8 | 707740   |
| 414.0305 | 22.30383 | 22.26717 | 22.349   | 5  | 2 | 3 | 648631.3 | 2589460  | 3709539  |
| 311.2699 | 13.09522 | 13.06597 | 13.15133 | 7  | 3 | 4 | 72951.46 | 190200.3 | 221809.3 |
| 500.1925 | 10.37793 | 10.34782 | 10.44485 | 6  | 1 | 5 | 1020025  | 1680520  | 2212681  |
| 283.07   | 7.6215   | 7.261583 | 7.720817 | 5  | 3 | 1 | 5107805  | 1.14E+08 | 90126244 |
| 212.0373 | 11.05192 | 10.86645 | 11.0843  | 9  | 4 | 5 | 4646645  | 20568458 | 36310267 |
| 478.4009 | 16.98467 | 16.96683 | 17.00833 | 6  | 3 | 3 | 86417.13 | 259246.7 | 268350.5 |
| 416.0095 | 14.56161 | 14.44873 | 14.62537 | 4  | 1 | 3 | 71632.88 | 186339.1 | 342772.8 |
| 184.0735 | 30.0325  | 30.00317 | 30.146   | 7  | 3 | 4 | 184991.4 | 1218306  | 847107.6 |
| 415.2121 | 24.6     | 24.53833 | 24.63833 | 8  | 4 | 4 | 1819705  | 10420972 | 11273612 |
| 603.4158 | 21.37625 | 21.3015  | 21.42217 | 6  | 3 | 3 | 53910.5  | 95387.99 | 128325.5 |
| 467.361  | 9.472467 | 9.2866   | 9.515567 | 6  | 3 | 3 | 1351488  | 1879617  | 1944514  |
| 424.9986 | 17.28058 | 17.196   | 17.3295  | 4  | 1 | 3 | 84515.41 | 215044.1 | 350204.6 |
| 309.0911 | 21.76967 | 21.66133 | 21.8075  | 3  | 0 | 3 | 170849   | 727624   | 884840.7 |
| 306.2724 | 31.62867 | 31.59783 | 31.66567 | 5  | 2 | 3 | 50504.2  | 158449.7 | 179255.2 |
| 559.138  | 16.92925 | 16.9075  | 16.94367 | 4  | 1 | 3 | 67520.89 | 135495   | 239171.5 |
| 389.0073 | 21.67933 | 21.57183 | 21.7275  | 6  | 2 | 4 | 154775.1 | 506082.1 | 681160.1 |
| 437.2653 | 23.80075 | 23.75067 | 23.812   | 6  | 2 | 4 | 156676.6 | 393611   | 636362.3 |
| 612.2398 | 10.71462 | 10.69325 | 10.75515 | 4  | 1 | 3 | 2226975  | 3693969  | 7483418  |
| 792.2669 | 28.96867 | 28.95917 | 28.9805  | 6  | 3 | 3 | 105335.8 | 462357.3 | 545985.9 |
| 526.3953 | 32.24633 | 32.2195  | 32.28017 | 10 | 5 | 5 | 1579999  | 6558274  | 7411107  |
| 429.3188 | 34.77183 | 34.73667 | 34.81033 | 7  | 3 | 4 | 369837.4 | 392881.8 | 433162.7 |
| 453.9315 | 16.9465  | 16.89217 | 16.97683 | 8  | 3 | 5 | 383735   | 1172724  | 2401051  |
| 329.2443 | 10.26028 | 10.00747 | 10.30878 | 5  | 1 | 3 | 161511.7 | 266638.2 | 350071   |
| 200.0917 | 9.496317 | 9.473767 | 9.537367 | 4  | 1 | 3 | 2611595  | 3035071  | 4960188  |
| 266.2483 | 18.93883 | 18.90983 | 18.967   | 10 | 5 | 5 | 2072256  | 10317891 | 10064396 |
| 348.7842 | 27.272   | 27.26683 | 27.316   | 5  | 2 | 3 | 88649.54 | 217367   | 283115.5 |

|          |          |          |          |    |   |   |          |          |          |
|----------|----------|----------|----------|----|---|---|----------|----------|----------|
| 371.1311 | 21.0525  | 21.0505  | 21.07733 | 3  | 0 | 3 | 1064780  | 4160900  | 4594954  |
| 634.2487 | 29.228   | 29.08283 | 29.31467 | 11 | 5 | 4 | 388063.9 | 522088.5 | 419464.4 |
| 665.4677 | 29.88433 | 29.86    | 29.92167 | 10 | 5 | 5 | 935688.3 | 9323053  | 2203990  |
| 748.1864 | 29.228   | 29.2135  | 29.29983 | 5  | 1 | 4 | 98844.89 | 234149   | 426263.5 |
| 790.5902 | 34.879   | 34.8415  | 34.91717 | 7  | 3 | 4 | 627122.4 | 6819805  | 6632282  |
| 425.2051 | 9.6753   | 9.602367 | 9.7372   | 9  | 5 | 4 | 5685549  | 3912176  | 4639833  |
| 331.1887 | 9.531333 | 9.463983 | 9.537367 | 3  | 0 | 3 | 6773055  | 7208595  | 11595625 |
| 332.1945 | 15.64082 | 15.59763 | 15.7074  | 10 | 5 | 5 | 339787   | 1732368  | 1574516  |
| 348.29   | 33.33767 | 33.32417 | 33.3555  | 5  | 3 | 2 | 97488.06 | 451744   | 534715.8 |
| 949.595  | 43.62317 | 43.53283 | 43.6355  | 10 | 5 | 5 | 142422.1 | 1304313  | 258595.1 |
| 272.1862 | 16.69558 | 16.65583 | 16.724   | 10 | 5 | 5 | 3335095  | 23471256 | 23771067 |
| 277.0563 | 18.12058 | 18.08433 | 18.1585  | 8  | 3 | 5 | 2044588  | 7151626  | 9661538  |
| 452.3144 | 27.35433 | 27.33233 | 27.374   | 5  | 4 | 1 | 96709.02 | 324881.5 | 317824.7 |
| 355.0414 | 15.62983 | 15.5829  | 15.68498 | 4  | 1 | 3 | 86819.53 | 321342.4 | 642755   |
| 334.6742 | 10.02349 | 9.9637   | 10.04445 | 6  | 2 | 4 | 939792.4 | 1493568  | 2605608  |
| 501.19   | 10.40768 | 10.37933 | 10.43838 | 8  | 3 | 5 | 47714160 | 76235780 | 1.37E+08 |
| 399.2511 | 29.64058 | 29.57833 | 29.68167 | 10 | 5 | 5 | 47707200 | 2.11E+08 | 1.88E+08 |
| 1112.68  | 29.17008 | 29.14083 | 29.28517 | 6  | 3 | 3 | 398962.3 | 624122.8 | 1041466  |
| 172.1698 | 19.41808 | 19.4025  | 19.48333 | 10 | 5 | 5 | 378628.7 | 1110245  | 1049453  |
| 325.0899 | 27.472   | 27.4605  | 27.52983 | 5  | 2 | 3 | 140043.4 | 543805.8 | 628388.8 |
| 299.0821 | 22.10083 | 22.07917 | 22.1385  | 5  | 3 | 2 | 1376647  | 5200845  | 7026530  |
| 255.0682 | 11.06992 | 10.8821  | 11.28918 | 9  | 3 | 5 | 496426.8 | 1789361  | 2976709  |
| 490.3228 | 9.26545  | 9.1639   | 9.322017 | 6  | 3 | 3 | 2323096  | 2586764  | 1596145  |
| 1111.631 | 10.66553 | 10.64867 | 10.69263 | 5  | 2 | 3 | 2618626  | 2302297  | 3042686  |
| 482.369  | 32.29433 | 32.26967 | 32.32267 | 8  | 3 | 5 | 688556.9 | 3026154  | 3355366  |
| 375.3015 | 18.93883 | 18.90983 | 18.967   | 10 | 5 | 5 | 1970210  | 10375606 | 10195141 |
| 312.0899 | 16.9865  | 16.965   | 17.0075  | 5  | 2 | 3 | 114324.6 | 445916   | 784868.9 |
| 331.0845 | 21.99225 | 21.8625  | 22.034   | 4  | 0 | 4 | 49441.17 | 102889.8 | 131864.6 |
| 240.0686 | 15.89645 | 15.7262  | 15.939   | 11 | 5 | 5 | 2827419  | 15639596 | 26078487 |
| 624.2007 | 28.39117 | 28.3815  | 28.48133 | 5  | 3 | 2 | 67716.76 | 155628.5 | 257153.4 |
| 311.3791 | 16.95033 | 16.893   | 16.96167 | 4  | 1 | 3 | 27101.86 | 57090.34 | 113890.5 |
| 485.3711 | 10.86477 | 10.76473 | 10.93685 | 9  | 5 | 4 | 445516.8 | 764502.4 | 1095317  |
| 215.0572 | 18.094   | 18.07617 | 18.12517 | 3  | 0 | 3 | 59982.56 | 273689.2 | 79744.58 |
| 283.2387 | 12.10948 | 12.06322 | 12.13527 | 6  | 3 | 3 | 53418.13 | 119485.3 | 122039.6 |
| 219.1748 | 10.0997  | 10.0778  | 10.12872 | 5  | 2 | 3 | 1124067  | 2254872  | 3312348  |
| 303.181  | 22.542   | 22.48433 | 22.55217 | 5  | 3 | 2 | 55734.05 | 188973.4 | 180082.8 |
| 322.0547 | 22.66567 | 22.60367 | 22.70883 | 7  | 4 | 3 | 78608.53 | 295719.6 | 317798.3 |
| 780.2586 | 41.208   | 41.193   | 41.25217 | 7  | 4 | 3 | 115905.7 | 257195.2 | 212694.6 |
| 282.0986 | 15.85185 | 15.74115 | 15.95042 | 8  | 3 | 4 | 222715.1 | 906991.7 | 1638965  |
| 313.1805 | 15.63063 | 15.59763 | 15.6926  | 9  | 4 | 5 | 196141.8 | 717348.5 | 932390.4 |
| 1114.602 | 10.66922 | 10.66397 | 10.77118 | 7  | 3 | 4 | 4647543  | 4282527  | 9047165  |
| 507.2634 | 9.187083 | 8.904467 | 9.2529   | 9  | 5 | 4 | 26401334 | 37044389 | 54545770 |
| 387.2538 | 44.65717 | 44.5865  | 44.70333 | 8  | 3 | 4 | 400408.1 | 456425.2 | 342118.5 |
| 733.5518 | 23.83917 | 23.7675  | 23.86133 | 7  | 3 | 4 | 177793.8 | 902700.1 | 1069451  |
| 363.6114 | 32.72633 | 32.693   | 32.84617 | 5  | 1 | 4 | 62256.95 | 109841.2 | 242347.7 |
| 244.2276 | 12.87255 | 12.84582 | 12.9364  | 7  | 3 | 4 | 255798.8 | 592135   | 428997.8 |
| 774.1836 | 22.98917 | 22.943   | 23.01883 | 7  | 3 | 4 | 1186037  | 2544960  | 3909666  |

|          |          |          |          |    |   |   |          |          |          |
|----------|----------|----------|----------|----|---|---|----------|----------|----------|
| 338.8086 | 9.50875  | 9.463983 | 9.565117 | 6  | 2 | 4 | 1659112  | 3252303  | 4675103  |
| 731.5361 | 37.314   | 37.26917 | 37.39983 | 7  | 3 | 4 | 75109.13 | 343462.2 | 374176.2 |
| 358.132  | 20.43792 | 20.4255  | 20.56367 | 6  | 2 | 4 | 268744.4 | 727289.7 | 982200.6 |
| 429.3013 | 29.76767 | 29.74033 | 29.78817 | 10 | 5 | 5 | 142120.6 | 1250325  | 414707.6 |
| 695.1782 | 27.4675  | 27.45867 | 27.54433 | 6  | 2 | 4 | 229387.4 | 924202.6 | 1247029  |
| 790.6169 | 44.95917 | 44.90083 | 44.97467 | 10 | 5 | 5 | 98739.48 | 809798   | 206108.3 |
| 717.4902 | 9.3496   | 9.272433 | 9.602367 | 7  | 3 | 3 | 16234672 | 8468790  | 9975300  |
| 566.9302 | 10.11891 | 10.02378 | 10.17413 | 8  | 5 | 3 | 8488522  | 11256364 | 14190411 |
| 614.4845 | 35.26567 | 35.2495  | 35.3105  | 7  | 3 | 4 | 894204.8 | 10813928 | 11098055 |
| 441.4135 | 35.16183 | 35.147   | 35.21983 | 10 | 5 | 5 | 8542213  | 40051118 | 27297113 |
| 575.2971 | 29.18083 | 29.16983 | 29.228   | 4  | 3 | 1 | 294622.1 | 744582.3 | 1161666  |
| 207.08   | 29.51983 | 29.419   | 29.53567 | 6  | 2 | 4 | 466951.2 | 1217539  | 2320677  |
| 270.9424 | 30.42225 | 30.29017 | 30.44967 | 4  | 1 | 3 | 112817.7 | 170216.7 | 318181.6 |
| 583.1198 | 33.30233 | 33.2885  | 33.32083 | 5  | 1 | 4 | 189351.8 | 474801.8 | 1024363  |
| 383.3471 | 10.06267 | 9.78225  | 10.08522 | 4  | 1 | 3 | 102594.7 | 163303   | 194449.7 |
| 342.32   | 31.0515  | 30.93633 | 31.16467 | 7  | 3 | 4 | 283683.5 | 3443486  | 2234925  |
| 489.2055 | 19.893   | 19.8625  | 19.956   | 5  | 1 | 4 | 46646.23 | 82584.67 | 112544.4 |
| 383.8125 | 10.08403 | 9.9637   | 10.1147  | 8  | 4 | 4 | 1034459  | 990961.5 | 1687236  |
| 381.2355 | 30.777   | 30.73283 | 30.83517 | 4  | 0 | 4 | 46652.39 | 188659.8 | 87091.66 |
| 415.2122 | 21.496   | 21.39833 | 21.52233 | 10 | 5 | 5 | 5357479  | 16012642 | 14095463 |
| 893.6259 | 33.93158 | 33.92033 | 33.938   | 8  | 3 | 5 | 166726.2 | 707246.1 | 866121.7 |
| 1292.639 | 41.20783 | 41.16333 | 41.23617 | 9  | 5 | 4 | 562475.3 | 1398147  | 1921401  |
| 206.0896 | 30.848   | 30.73283 | 30.88867 | 10 | 5 | 5 | 919056.6 | 5422027  | 5243483  |
| 437.3414 | 9.178    | 9.101033 | 9.280533 | 7  | 5 | 2 | 2794980  | 7676315  | 5362659  |
| 385.9992 | 15.90618 | 15.80118 | 15.93323 | 8  | 4 | 4 | 2067142  | 8522417  | 16685267 |
| 453.3622 | 36.11283 | 36.06767 | 36.13    | 7  | 3 | 4 | 74903.11 | 246782.1 | 288516.3 |
| 279.0679 | 30.73358 | 30.67617 | 30.8325  | 4  | 1 | 3 | 766936.2 | 2123758  | 2480447  |
| 371.2275 | 8.7798   | 8.551733 | 8.83155  | 3  | 3 | 0 | 3918797  | 885060.1 | 892779.4 |
| 256.1912 | 17.43792 | 17.31183 | 17.50383 | 10 | 5 | 5 | 210247.1 | 1446673  | 1479290  |
| 531.2917 | 30.4955  | 30.47117 | 30.59083 | 9  | 5 | 4 | 320169.3 | 1155650  | 1251168  |
| 441.1    | 25.98183 | 25.949   | 26.04517 | 6  | 2 | 4 | 56894.76 | 127791.6 | 221596.6 |
| 1176.7   | 9.445533 | 9.3968   | 9.463983 | 4  | 1 | 3 | 12451402 | 11130237 | 22537147 |
| 923.5936 | 43.60158 | 43.59317 | 43.61617 | 4  | 1 | 3 | 63213.34 | 174329.4 | 237592.8 |
| 315.217  | 28.916   | 28.8075  | 28.9365  | 5  | 2 | 3 | 45591.45 | 192391.3 | 113305.6 |
| 343.9755 | 18.09967 | 18.0455  | 18.153   | 4  | 1 | 3 | 63766.78 | 173779.1 | 241409.2 |
| 247.1657 | 16.93758 | 16.88917 | 16.96917 | 10 | 5 | 5 | 1071609  | 6066747  | 5172776  |
| 640.4525 | 33.32758 | 33.279   | 33.42333 | 6  | 3 | 3 | 82282.61 | 94085.99 | 104602.9 |
| 325.5883 | 27.46742 | 27.427   | 27.53083 | 6  | 2 | 4 | 114480.4 | 449179.5 | 617719.3 |
| 560.0881 | 25.91917 | 25.91633 | 25.926   | 4  | 1 | 3 | 37688.83 | 67070.48 | 112694.8 |
| 266.233  | 14.53727 | 14.49833 | 14.69188 | 7  | 3 | 4 | 92758.02 | 464809.4 | 467124.2 |
| 321.264  | 25.44892 | 25.40883 | 25.47683 | 6  | 2 | 4 | 203853.1 | 242047.9 | 300315.9 |
| 239.0311 | 14.07078 | 13.81973 | 14.20757 | 11 | 3 | 5 | 200834.9 | 980775.4 | 1020070  |
| 569.2378 | 26.23933 | 26.15833 | 26.30383 | 8  | 3 | 5 | 180316.3 | 542469   | 672874.2 |
| 319.0792 | 27.27075 | 27.17183 | 27.28633 | 6  | 3 | 3 | 166608.7 | 783800.5 | 801478.6 |
| 385.0374 | 26.879   | 26.80717 | 26.92883 | 5  | 2 | 3 | 51525.05 | 102131.7 | 163878.4 |
| 622.5193 | 9.967367 | 9.917283 | 9.988417 | 4  | 3 | 1 | 151796.6 | 154904.5 | 235569.3 |
| 469.3403 | 10.69392 | 10.6177  | 10.77118 | 7  | 3 | 4 | 1104059  | 1710960  | 2030786  |

|          |          |          |          |    |   |   |          |          |          |
|----------|----------|----------|----------|----|---|---|----------|----------|----------|
| 669.9574 | 43.21692 | 43.15883 | 43.2185  | 4  | 3 | 1 | 43511.09 | 255741   | 87390.95 |
| 696.9019 | 9.71975  | 9.6609   | 9.7372   | 5  | 2 | 3 | 596545.7 | 565539.9 | 1106922  |
| 388.9826 | 21.70217 | 21.67933 | 21.7285  | 6  | 2 | 4 | 145497.2 | 485783.2 | 665698   |
| 310.2073 | 33.488   | 33.40883 | 33.534   | 6  | 3 | 3 | 84847.69 | 290067.3 | 351342.8 |
| 343.2596 | 31.30775 | 31.216   | 31.373   | 10 | 5 | 5 | 810024.4 | 2717623  | 2605866  |
| 878.4042 | 30.21808 | 30.11717 | 30.23533 | 8  | 3 | 5 | 49535.27 | 185612.4 | 200554   |
| 418.0265 | 25.68983 | 25.65733 | 25.69883 | 5  | 1 | 4 | 84294.02 | 184219.9 | 402503.5 |
| 282.4684 | 18.11767 | 18.09117 | 18.158   | 5  | 2 | 3 | 46008.23 | 153621.8 | 233324.1 |
| 395.128  | 16.6685  | 16.64683 | 16.73567 | 5  | 2 | 3 | 58412.89 | 261073.2 | 327577.3 |
| 586.2599 | 29.18433 | 29.14083 | 29.25583 | 6  | 2 | 4 | 234723.2 | 587644.4 | 704691.9 |
| 531.3318 | 38.75033 | 38.70017 | 38.81317 | 5  | 3 | 2 | 27214.32 | 57834.42 | 35742.6  |
| 512.2699 | 43.57083 | 43.4645  | 43.7415  | 3  | 3 | 0 | 80389.24 | 1386406  | 365811.9 |
| 297.1856 | 15.75743 | 15.6928  | 15.81567 | 10 | 5 | 5 | 160944.1 | 681973.5 | 606890   |
| 257.0349 | 11.063   | 10.9623  | 11.0701  | 5  | 2 | 3 | 2740472  | 2512583  | 5258074  |
| 318.083  | 18.13075 | 18.06983 | 18.16983 | 8  | 3 | 5 | 1254357  | 4356248  | 5814255  |
| 294.2361 | 20.071   | 20.0255  | 20.18917 | 6  | 2 | 4 | 132748.2 | 254399.8 | 321589.3 |
| 291.2324 | 24.48167 | 24.428   | 24.50533 | 5  | 3 | 2 | 125512.2 | 581145   | 672926.3 |
| 340.7929 | 9.515    | 9.412217 | 9.654    | 5  | 2 | 3 | 2.57E+08 | 46065425 | 55802273 |
| 530.2882 | 30.49833 | 30.47117 | 30.59083 | 10 | 5 | 5 | 1236095  | 4850853  | 5298229  |
| 408.3324 | 36.50467 | 36.50083 | 36.531   | 7  | 3 | 4 | 106906.2 | 588097.2 | 414577.6 |
| 394.3434 | 9.70325  | 9.65795  | 9.718267 | 4  | 1 | 3 | 587293.1 | 793198.2 | 1158868  |
| 198.1491 | 10.10742 | 9.993883 | 10.25052 | 6  | 2 | 3 | 677893.9 | 2528052  | 2823388  |
| 271.9004 | 32.4975  | 32.39533 | 32.55117 | 7  | 3 | 4 | 121854   | 455820.9 | 239127.6 |
| 690.5043 | 10.36217 | 10.1353  | 10.42607 | 8  | 3 | 5 | 1470175  | 1387930  | 1488793  |
| 547.467  | 22.45817 | 22.4105  | 22.49083 | 9  | 4 | 5 | 81123.48 | 226725.6 | 237320.6 |
| 364.9803 | 9.47815  | 9.444983 | 9.537367 | 3  | 0 | 3 | 3889489  | 2239984  | 4433433  |
| 1290.632 | 41.19333 | 41.16333 | 41.23617 | 10 | 5 | 5 | 2025389  | 5421656  | 7611439  |
| 435.3587 | 28.56767 | 28.483   | 28.59617 | 7  | 3 | 4 | 120293   | 516062.3 | 647404   |
| 760.187  | 29.228   | 29.2     | 29.26133 | 6  | 4 | 2 | 77131.28 | 427179.9 | 163717.4 |
| 449.6983 | 10.67897 | 10.599   | 10.75237 | 7  | 2 | 5 | 5506596  | 9966526  | 20179753 |
| 245.0789 | 17.14017 | 17.03717 | 17.19717 | 10 | 5 | 5 | 1139736  | 5597955  | 6273738  |
| 544.3797 | 11.22369 | 11.20932 | 11.22767 | 4  | 1 | 3 | 40875.54 | 91880.88 | 96743.07 |
| 452.3292 | 20.40942 | 20.3965  | 20.588   | 6  | 3 | 3 | 66717.27 | 269763.1 | 242262.9 |
| 567.4366 | 18.26283 | 18.253   | 18.302   | 5  | 2 | 3 | 53387.54 | 124564.2 | 147555.6 |
| 320.2226 | 15.37911 | 15.36078 | 15.39463 | 4  | 1 | 3 | 33745.62 | 131394   | 72193.45 |
| 397.9892 | 18.1395  | 18.08867 | 18.1585  | 5  | 3 | 2 | 174764.3 | 1022236  | 1019816  |
| 281.0953 | 15.90863 | 15.80118 | 15.9483  | 10 | 5 | 5 | 1952199  | 11019216 | 18067671 |
| 739.1969 | 32.12658 | 32.10233 | 32.19133 | 6  | 2 | 4 | 85636.22 | 235972.6 | 196503.3 |
| 358.2957 | 24.882   | 24.8735  | 24.91983 | 5  | 1 | 4 | 85657.91 | 364849.8 | 449539.4 |
| 523.1062 | 29.11617 | 29.08083 | 29.1255  | 4  | 3 | 1 | 34199.59 | 85097.69 | 114088.1 |
| 405.301  | 28.7755  | 28.7495  | 28.7945  | 5  | 2 | 3 | 72899.66 | 223805.9 | 212692.7 |
| 498.1245 | 18.10333 | 18.047   | 18.14    | 4  | 1 | 3 | 121290.2 | 310184.8 | 500761.7 |
| 305.7366 | 23.027   | 22.97417 | 23.06783 | 6  | 2 | 4 | 44135.07 | 107914.6 | 134658.1 |
| 552.0622 | 18.43225 | 18.38883 | 18.47767 | 6  | 2 | 4 | 81913.63 | 242358   | 383607.4 |
| 1291.636 | 41.19333 | 41.178   | 41.23617 | 10 | 5 | 5 | 1464723  | 3931489  | 5603922  |
| 280.6552 | 32.10983 | 32.05883 | 32.17667 | 6  | 4 | 2 | 188512.7 | 1089076  | 1064627  |
| 315.1962 | 14.02533 | 13.93198 | 14.11172 | 10 | 5 | 5 | 811194.5 | 3978433  | 4486382  |



|          |          |          |          |    |   |   |          |          |          |
|----------|----------|----------|----------|----|---|---|----------|----------|----------|
| 1064.678 | 29.17    | 29.14083 | 29.21933 | 4  | 3 | 1 | 217678.2 | 372960.6 | 690147.7 |
| 749.5466 | 28.7875  | 28.75783 | 28.795   | 8  | 4 | 4 | 229983.9 | 953942.2 | 1149017  |
| 834.5803 | 31.82667 | 31.81083 | 31.85467 | 9  | 4 | 5 | 237882.8 | 1058074  | 1197485  |
| 686.5212 | 38.21483 | 38.1115  | 38.35367 | 4  | 1 | 3 | 73622.11 | 492648.6 | 105382.2 |
| 429.6423 | 23.18175 | 23.09983 | 23.21    | 10 | 5 | 5 | 61303.02 | 244402.5 | 240115.7 |
| 486.2985 | 9.20005  | 9.101033 | 9.266783 | 5  | 3 | 2 | 4345875  | 3024347  | 4989630  |
| 739.2316 | 41.22283 | 41.193   | 41.26683 | 7  | 4 | 3 | 143701.9 | 359686   | 307760.1 |
| 433.001  | 22.98233 | 22.938   | 23.01883 | 10 | 5 | 5 | 3628233  | 12091067 | 18041003 |
| 267.1033 | 25.66967 | 25.6535  | 25.69883 | 6  | 2 | 4 | 72708.3  | 221175.9 | 174124.7 |
| 743.8786 | 30.74758 | 30.474   | 30.80633 | 4  | 1 | 3 | 75760.62 | 133187.8 | 289909.6 |
| 289.1063 | 10.66473 | 10.58428 | 10.76465 | 7  | 2 | 5 | 2570570  | 6153078  | 11777973 |
| 400.2546 | 29.64058 | 29.57833 | 29.68167 | 10 | 5 | 5 | 9824407  | 42838321 | 38438455 |
| 660.2528 | 30.27317 | 30.23533 | 30.36167 | 7  | 3 | 4 | 209147.1 | 281154.7 | 291449.6 |
| 517.1783 | 10.6638  | 10.59208 | 10.75237 | 8  | 4 | 4 | 483010.2 | 1313854  | 1370352  |
| 510.163  | 10.72198 | 10.6177  | 10.77118 | 4  | 1 | 3 | 235834.3 | 302003.9 | 486430.8 |
| 516.1296 | 27.16158 | 27.12967 | 27.215   | 10 | 5 | 5 | 3556674  | 12945232 | 17135313 |
| 488.9462 | 22.06392 | 22.00883 | 22.1365  | 4  | 1 | 3 | 46754.18 | 168477.5 | 197586.7 |
| 1135.676 | 29.12633 | 29.111   | 29.2705  | 5  | 3 | 2 | 255013.1 | 327939.8 | 586571.4 |
| 798.5086 | 9.71975  | 9.685033 | 9.7372   | 5  | 3 | 2 | 964801.8 | 838903.2 | 1461945  |
| 271.6126 | 10.68883 | 10.58428 | 10.75237 | 8  | 3 | 5 | 1066448  | 2408656  | 4339224  |
| 304.7409 | 23.048   | 22.97417 | 23.073   | 9  | 4 | 5 | 181103.8 | 762482.5 | 887697.8 |
| 544.4063 | 23.19125 | 23.0745  | 23.22367 | 6  | 3 | 3 | 212063.1 | 259471.8 | 323312.1 |
| 524.3336 | 17.64233 | 17.63367 | 17.65867 | 4  | 3 | 1 | 53547.16 | 136258.6 | 131361.9 |
| 332.28   | 39.58658 | 39.5005  | 39.606   | 6  | 2 | 4 | 113949   | 907825   | 300638.5 |
| 556.0726 | 26.65383 | 26.586   | 26.6795  | 7  | 2 | 5 | 262768.6 | 748759.4 | 1022146  |
| 285.2907 | 20.26667 | 20.2315  | 20.403   | 5  | 2 | 3 | 31365.24 | 57767.81 | 68507.17 |
| 331.1911 | 15.64102 | 15.59763 | 15.7074  | 10 | 5 | 5 | 1940737  | 10905346 | 9418044  |
| 810.3147 | 23.12017 | 23.09333 | 23.13033 | 5  | 2 | 3 | 149525.1 | 378113.4 | 636095.8 |
| 724.4116 | 41.20767 | 41.16333 | 41.23617 | 9  | 4 | 5 | 320530.1 | 1655738  | 1119308  |
| 395.3202 | 32.2625  | 32.2235  | 32.29083 | 5  | 2 | 3 | 53009.72 | 112773.1 | 124531   |
| 468.9977 | 42.95933 | 42.89083 | 42.988   | 4  | 0 | 4 | 20718.35 | 80927.34 | 12112.47 |
| 212.1649 | 11.11091 | 11.08068 | 11.28568 | 6  | 1 | 5 | 145722.6 | 427465.7 | 459153.2 |
| 613.1312 | 26.99883 | 26.952   | 27.04417 | 5  | 2 | 3 | 36524.51 | 85568.79 | 114128.9 |
| 710.9728 | 9.537367 | 9.43065  | 9.584433 | 7  | 4 | 3 | 6334846  | 11923906 | 9308514  |
| 301.2015 | 25.92817 | 25.87667 | 26.0005  | 7  | 3 | 4 | 191976.8 | 577877.1 | 657494.3 |
| 317.2052 | 19.36892 | 19.32383 | 19.4025  | 10 | 5 | 5 | 9021395  | 38716831 | 43781353 |
| 435.1735 | 25.90825 | 25.90167 | 25.947   | 6  | 2 | 4 | 87194.28 | 245182   | 340239.3 |
| 696.5397 | 7.281467 | 7.184817 | 7.3246   | 5  | 2 | 3 | 694149.6 | 353132   | 688764.4 |
| 878.6074 | 21.20083 | 21.1315  | 21.24967 | 5  | 2 | 3 | 138499.8 | 491736.9 | 564117   |
| 631.0982 | 10.85758 | 10.80383 | 10.93685 | 8  | 3 | 5 | 245564.9 | 416046.5 | 643790   |
| 234.1144 | 11.75985 | 11.65528 | 11.92125 | 7  | 4 | 3 | 137568   | 514172.9 | 745424   |
| 279.1912 | 30.805   | 30.48833 | 30.93717 | 8  | 4 | 3 | 47162904 | 24943406 | 54801229 |
| 514.1404 | 22.119   | 22.04967 | 22.16383 | 8  | 3 | 5 | 533274.7 | 1677164  | 2276398  |
| 604.0958 | 10.76465 | 10.70767 | 10.77882 | 5  | 2 | 3 | 1967187  | 4246329  | 8536849  |
| 296.1363 | 26.99325 | 26.95617 | 27.045   | 6  | 2 | 4 | 61127.36 | 169857.3 | 233602.7 |
| 702.5008 | 34.5665  | 34.51967 | 34.58817 | 5  | 3 | 2 | 615775   | 4694583  | 6436973  |
| 432.2025 | 15.0387  | 14.98237 | 15.1654  | 10 | 5 | 5 | 1868250  | 8493478  | 10489036 |

|          |          |          |          |    |   |   |          |          |          |
|----------|----------|----------|----------|----|---|---|----------|----------|----------|
| 520.2368 | 15.83088 | 15.78005 | 15.90278 | 7  | 2 | 5 | 97366.24 | 241876.9 | 450886.2 |
| 461.2731 | 23.17283 | 23.09983 | 23.22367 | 9  | 5 | 4 | 210125.9 | 1019619  | 678434.2 |
| 294.2281 | 17.66533 | 17.63367 | 17.71    | 10 | 5 | 5 | 84626.19 | 411369.6 | 194430.3 |
| 195.1382 | 16.70425 | 16.65583 | 16.74017 | 8  | 5 | 3 | 312088.5 | 2115102  | 1899161  |
| 402.2876 | 10.42228 | 10.31842 | 10.62195 | 5  | 2 | 3 | 1.33E+08 | 1.19E+08 | 1.44E+08 |
| 432.2388 | 21.50183 | 21.39833 | 21.52233 | 8  | 4 | 4 | 3822915  | 9698412  | 8203117  |
| 394.2231 | 11.28632 | 11.21035 | 11.38502 | 10 | 5 | 5 | 4656883  | 9909036  | 19106142 |
| 572.0672 | 15.62175 | 15.61248 | 15.65558 | 5  | 1 | 4 | 211073.9 | 578252.8 | 1159279  |
| 244.2275 | 21.02542 | 21.00017 | 21.05067 | 4  | 3 | 1 | 663089.3 | 2120215  | 2298300  |
| 624.2626 | 42.62267 | 42.59017 | 42.636   | 3  | 0 | 3 | 36525.14 | 139643.7 | 23274.41 |
| 345.1816 | 16.17522 | 16.14437 | 16.22193 | 10 | 5 | 5 | 213568.9 | 848538.6 | 692677.2 |
| 762.9413 | 9.822817 | 9.777783 | 9.862433 | 5  | 2 | 3 | 231244.7 | 307269.6 | 474331.8 |
| 786.1966 | 9.52075  | 9.5169   | 9.537367 | 3  | 0 | 3 | 1293356  | 1637323  | 3192218  |
| 285.9122 | 13.32273 | 13.18458 | 13.34552 | 6  | 2 | 4 | 504035.2 | 2037034  | 3688373  |
| 295.1882 | 32.5     | 32.37967 | 32.53617 | 10 | 5 | 5 | 4165952  | 15518530 | 22457921 |
| 397.406  | 29.637   | 29.57833 | 29.6815  | 9  | 5 | 4 | 72990.04 | 286420.1 | 285091.7 |
| 455.3317 | 10.03463 | 10.02378 | 10.33698 | 5  | 3 | 2 | 969985.7 | 1908784  | 2319447  |
| 283.2831 | 15.28328 | 15.2308  | 15.30603 | 4  | 1 | 3 | 36761.09 | 150066.9 | 155170.8 |
| 897.4181 | 25.6135  | 25.5895  | 25.64467 | 7  | 3 | 4 | 176463   | 503654.8 | 667743.3 |
| 328.2127 | 27.64233 | 27.54433 | 27.69233 | 6  | 2 | 4 | 44277.75 | 217246.1 | 220371.9 |
| 1111.675 | 29.18442 | 29.15517 | 29.2705  | 6  | 3 | 3 | 682725.1 | 1065138  | 1764212  |
| 565.4217 | 29.11133 | 29.11083 | 29.22633 | 4  | 3 | 1 | 44407.08 | 118112   | 134183.5 |
| 743.1956 | 29.24733 | 29.198   | 29.2705  | 3  | 0 | 3 | 100126.6 | 202474   | 332380.1 |
| 310.7595 | 9.952725 | 9.915283 | 9.988417 | 6  | 3 | 3 | 128057.5 | 148431.7 | 210765.1 |
| 371.1891 | 22.12217 | 22.05267 | 22.14983 | 7  | 3 | 4 | 310606   | 612270.4 | 801278   |
| 425.0305 | 18.10567 | 18.089   | 18.16983 | 5  | 1 | 4 | 201016.4 | 988200.2 | 1390023  |
| 437.1626 | 17.18508 | 17.1775  | 17.196   | 4  | 1 | 3 | 319706.2 | 939261.5 | 1616185  |
| 456.1943 | 15.00965 | 14.922   | 15.0897  | 9  | 4 | 5 | 144172.7 | 472636.3 | 659969   |
| 301.217  | 18.113   | 18.11017 | 18.14967 | 3  | 0 | 3 | 70282.7  | 274933.2 | 149630.7 |
| 842.5764 | 29.75617 | 29.72467 | 29.77283 | 6  | 3 | 3 | 55212.75 | 458672.5 | 69395.06 |
| 775.1872 | 22.99133 | 22.928   | 23.01883 | 7  | 3 | 4 | 488477.4 | 1077792  | 1679027  |
| 518.3248 | 27.088   | 27.06833 | 27.15783 | 9  | 5 | 4 | 724580.6 | 4509186  | 4162134  |
| 352.106  | 16.68717 | 16.64683 | 16.70467 | 7  | 3 | 4 | 152256.1 | 762283.7 | 959502.7 |
| 736.2111 | 29.215   | 29.2     | 29.25767 | 4  | 4 | 0 | 232535.4 | 251219.1 | 125421.2 |
| 287.2221 | 33.46175 | 33.40883 | 33.5045  | 10 | 5 | 5 | 1502642  | 9300451  | 8975853  |
| 538.3209 | 42.67542 | 42.57867 | 42.76333 | 6  | 3 | 3 | 558876.5 | 1351460  | 725562.8 |
| 255.1596 | 16.69    | 16.65583 | 16.724   | 10 | 5 | 5 | 3277117  | 22605568 | 22714965 |
| 349.1103 | 27.3695  | 27.28533 | 27.40283 | 5  | 2 | 3 | 45770.96 | 115219.7 | 169339.5 |
| 341.6823 | 10.85763 | 10.80215 | 10.93685 | 8  | 3 | 5 | 4680428  | 7161297  | 12627301 |
| 227.056  | 13.67483 | 13.46135 | 13.78467 | 8  | 2 | 4 | 208670.2 | 715141   | 1037079  |
| 454.599  | 9.195542 | 9.101033 | 9.280533 | 4  | 3 | 1 | 1573036  | 1498128  | 792810.7 |
| 395.318  | 18.93867 | 18.90983 | 18.967   | 10 | 5 | 5 | 1601073  | 8083606  | 8115614  |
| 183.0364 | 20.75867 | 20.629   | 20.80217 | 5  | 1 | 3 | 4158220  | 7479495  | 11539059 |
| 554.2884 | 30.3745  | 30.34033 | 30.4615  | 9  | 5 | 4 | 341397.9 | 1221373  | 1323667  |
| 555.3221 | 19.76117 | 19.725   | 19.887   | 8  | 3 | 5 | 165658   | 475999.1 | 533918.5 |
| 569.5008 | 30.37033 | 30.32533 | 30.433   | 10 | 5 | 5 | 3509073  | 10828521 | 8558629  |
| 352.306  | 34.66817 | 34.5805  | 34.6865  | 5  | 2 | 3 | 33468.91 | 127540.4 | 152191.8 |

|          |          |          |          |    |   |   |          |          |          |
|----------|----------|----------|----------|----|---|---|----------|----------|----------|
| 351.2591 | 19.54383 | 19.49117 | 19.56167 | 9  | 4 | 5 | 249072.9 | 437602.6 | 668745.3 |
| 331.1578 | 25.967   | 25.92817 | 26.00483 | 6  | 2 | 4 | 46016.35 | 108184.7 | 128312.2 |
| 356.2291 | 22.37775 | 22.27817 | 22.4     | 6  | 2 | 4 | 43340.78 | 93494.05 | 107659.1 |
| 559.0913 | 24.32792 | 24.22367 | 24.34267 | 6  | 2 | 4 | 60619.34 | 105195.7 | 186658.5 |
| 289.2377 | 35.07917 | 35.0125  | 35.11767 | 6  | 2 | 4 | 57579.39 | 350703.1 | 195699.4 |
| 387.9993 | 15.90678 | 15.81567 | 15.95405 | 5  | 1 | 4 | 100243   | 413718.6 | 689264   |
| 184.1698 | 15.13518 | 15.1133  | 15.25612 | 8  | 3 | 5 | 101441.7 | 517006   | 589517.3 |
| 358.1319 | 21.12367 | 21.11167 | 21.15517 | 5  | 2 | 3 | 205872.5 | 527019.4 | 702772.9 |
| 182.1545 | 9.565117 | 9.444983 | 9.596683 | 5  | 2 | 3 | 2759037  | 10281486 | 9054546  |
| 283.1315 | 26.22817 | 26.173   | 26.30383 | 7  | 2 | 5 | 135766.6 | 258213.4 | 202528.7 |
| 151.0755 | 25.78725 | 25.71833 | 25.822   | 6  | 3 | 3 | 117588.2 | 375170.5 | 254969.4 |
| 333.2662 | 9.518825 | 9.47815  | 9.545617 | 4  | 1 | 3 | 15462685 | 14420572 | 23286425 |
| 358.2018 | 30.43342 | 30.34733 | 30.48133 | 8  | 3 | 5 | 99718.73 | 370454.2 | 188987   |
| 312.9797 | 22.97467 | 22.928   | 23.01883 | 10 | 5 | 5 | 2273202  | 7500981  | 11447479 |
| 292.155  | 10.12157 | 9.970683 | 10.1405  | 4  | 1 | 3 | 130511.6 | 328140.5 | 402488.4 |
| 167.0705 | 21.4455  | 21.3015  | 21.4785  | 9  | 4 | 5 | 377128.2 | 1692032  | 1533035  |
| 516.9762 | 32.107   | 32.0875  | 32.19283 | 5  | 1 | 4 | 43576.64 | 71356.96 | 134582.5 |
| 464.6716 | 30.91467 | 30.8925  | 30.9515  | 4  | 1 | 3 | 569303.4 | 985148.2 | 2106210  |
| 433.2421 | 21.50383 | 21.46017 | 21.52233 | 7  | 4 | 3 | 975835.8 | 2075203  | 1764877  |
| 583.2395 | 22.136   | 22.1015  | 22.14983 | 5  | 2 | 3 | 1013603  | 2094827  | 3241087  |
| 332.3163 | 23.3125  | 23.25133 | 23.326   | 6  | 2 | 4 | 79008.98 | 121230.6 | 105342   |
| 482.0203 | 20.45217 | 20.4115  | 20.47867 | 5  | 2 | 3 | 536829.6 | 1652895  | 2801929  |
| 542.0928 | 33.29417 | 33.22817 | 33.32083 | 5  | 1 | 4 | 136962.5 | 334498.6 | 725353.8 |
| 400.4023 | 10.39901 | 10.34715 | 10.4545  | 6  | 1 | 5 | 412484.4 | 729651.7 | 794587.8 |
| 592.8936 | 10.14666 | 10.0312  | 10.15697 | 4  | 1 | 3 | 195221.6 | 192550.1 | 295580.7 |
| 279.1596 | 26.984   | 26.94683 | 26.99883 | 5  | 2 | 3 | 257509.7 | 1971011  | 642101.7 |
| 325.1916 | 11.37145 | 11.298   | 11.42132 | 5  | 1 | 4 | 77444.83 | 125114.8 | 106965   |
| 348.5142 | 9.518825 | 9.47815  | 9.545617 | 4  | 1 | 3 | 15358108 | 13356582 | 21389443 |
| 297.1345 | 32.144   | 32.07267 | 32.175   | 7  | 2 | 5 | 236135.3 | 607178   | 962599.2 |
| 541.4299 | 36.30717 | 36.29117 | 36.45567 | 10 | 5 | 5 | 595418.5 | 3043729  | 1699792  |
| 511.1651 | 29.66617 | 29.593   | 29.695   | 5  | 4 | 1 | 49509.15 | 191445.1 | 171566.9 |
| 302.2695 | 25.3755  | 25.32617 | 25.43733 | 8  | 5 | 3 | 531406.1 | 1340049  | 2128024  |
| 819.5598 | 10.60902 | 10.55748 | 10.63617 | 5  | 2 | 3 | 394850.9 | 317299.3 | 505268.6 |
| 389.2693 | 30.50875 | 30.48583 | 30.597   | 6  | 3 | 3 | 57746.02 | 171493.7 | 198123.4 |
| 273.2985 | 28.23633 | 28.168   | 28.27067 | 7  | 5 | 2 | 68789.55 | 150004.6 | 89055.32 |
| 217.1048 | 7.130092 | 6.861183 | 7.270233 | 6  | 3 | 2 | 722770.7 | 7540946  | 5440006  |
| 658.3451 | 41.23733 | 41.178   | 41.23783 | 5  | 3 | 2 | 43903.18 | 107866   | 81499.09 |
| 341.1807 | 10.85052 | 10.80215 | 10.93685 | 9  | 4 | 5 | 11946241 | 21412244 | 37387943 |
| 491.2997 | 9.193308 | 9.101033 | 9.266617 | 8  | 5 | 3 | 20680220 | 71561822 | 65980629 |
| 416.8215 | 44.80508 | 44.78667 | 44.97217 | 6  | 2 | 4 | 49551.02 | 420855.1 | 97511.2  |
| 570.422  | 32.18933 | 32.16233 | 32.2205  | 10 | 5 | 5 | 2387648  | 10663707 | 12112661 |
| 394.3148 | 18.93867 | 18.90983 | 18.967   | 10 | 5 | 5 | 13436735 | 75649723 | 72512136 |
| 541.1574 | 10.7167  | 10.64958 | 10.75237 | 7  | 3 | 4 | 26237608 | 62301114 | 1.29E+08 |
| 498.1246 | 11.05848 | 10.86645 | 11.13185 | 4  | 1 | 3 | 191412.9 | 368859.6 | 754198.4 |
| 576.2939 | 29.18433 | 29.1255  | 29.18517 | 3  | 3 | 0 | 177339   | 267254.1 | 382864.7 |
| 475.0308 | 22.98383 | 22.928   | 23.01883 | 9  | 4 | 5 | 1310105  | 4148910  | 6309802  |
| 918.602  | 31.469   | 31.4335  | 31.51383 | 6  | 3 | 3 | 41478.32 | 67842.12 | 47686.94 |

|          |          |          |          |    |   |   |          |          |          |
|----------|----------|----------|----------|----|---|---|----------|----------|----------|
| 530.84   | 16.95933 | 16.929   | 16.96783 | 4  | 1 | 3 | 129967.9 | 408451.4 | 858126.7 |
| 317.1365 | 19.51717 | 19.3355  | 19.53167 | 9  | 5 | 3 | 351762.8 | 1793242  | 2336973  |
| 651.105  | 10.69338 | 10.63273 | 10.77118 | 4  | 1 | 3 | 289894.8 | 309449.7 | 602150.2 |
| 605.1479 | 22.99367 | 22.9685  | 23.01883 | 6  | 2 | 4 | 161415.8 | 520973.8 | 721756.9 |
| 511.4095 | 9.14945  | 8.823117 | 9.231383 | 9  | 5 | 2 | 3627413  | 3265644  | 3384202  |
| 430.168  | 14.84508 | 14.83243 | 14.87695 | 3  | 0 | 3 | 76045.46 | 224677.1 | 388942.8 |
| 243.2318 | 23.764   | 23.69233 | 23.80217 | 4  | 4 | 0 | 57695.68 | 256387.9 | 375115.6 |
| 285.2542 | 15.55714 | 15.53405 | 15.6324  | 10 | 5 | 5 | 355732.4 | 1192033  | 1509031  |
| 572.2448 | 27.09533 | 27.03167 | 27.135   | 4  | 1 | 3 | 72603.71 | 273270.2 | 366426.5 |
| 741.2272 | 41.17825 | 41.1335  | 41.23617 | 6  | 2 | 4 | 55686.36 | 131220.2 | 100871.6 |
| 186.5667 | 29.5     | 29.432   | 29.58383 | 8  | 2 | 5 | 547675.6 | 1417012  | 2915018  |
| 1115.605 | 10.67828 | 10.66473 | 10.77118 | 5  | 1 | 4 | 4872741  | 5504328  | 11234087 |
| 527.3987 | 32.24275 | 32.2235  | 32.28017 | 10 | 5 | 5 | 346229.6 | 1522088  | 1810425  |
| 530.3813 | 10.95068 | 10.91052 | 10.98405 | 7  | 3 | 4 | 120449.1 | 275108   | 250832   |
| 402.291  | 28.717   | 28.68767 | 28.71933 | 5  | 2 | 3 | 66567.24 | 219560.9 | 177040.4 |
| 717.4703 | 9.489217 | 9.3803   | 9.596683 | 8  | 5 | 3 | 38287736 | 80875712 | 97749056 |
| 685.3911 | 8.802525 | 8.58785  | 8.86925  | 4  | 3 | 1 | 102049.3 | 154003   | 203707.6 |
| 318.2085 | 19.36892 | 19.32383 | 19.41817 | 10 | 5 | 5 | 1769582  | 7368894  | 8585502  |
| 368.2119 | 18.09383 | 18.06167 | 18.1585  | 6  | 2 | 4 | 74272.2  | 255483.1 | 236605   |
| 340.1407 | 13.0153  | 12.93312 | 13.05092 | 5  | 2 | 3 | 157423.1 | 242214   | 433689.6 |
| 594.8936 | 9.405933 | 9.36625  | 9.43065  | 4  | 1 | 3 | 3700989  | 2979014  | 4019253  |
| 468.3692 | 20.12425 | 20.07783 | 20.3295  | 4  | 3 | 1 | 54861.14 | 150085.4 | 192659.9 |
| 552.4171 | 12.59692 | 12.55463 | 12.6188  | 5  | 2 | 3 | 39477.41 | 82852.53 | 102704.1 |
| 745.5338 | 21.47717 | 21.35633 | 21.50867 | 7  | 4 | 3 | 238672.8 | 661591.2 | 677450.1 |
| 315.1963 | 14.57787 | 14.55197 | 14.67673 | 5  | 2 | 3 | 271624.5 | 1471584  | 1752140  |
| 212.1649 | 15.1499  | 15.10643 | 15.25612 | 10 | 5 | 5 | 247864.9 | 1254682  | 1404902  |
| 396.1305 | 19.7045  | 19.522   | 19.74033 | 5  | 2 | 3 | 40365.63 | 119354.1 | 169128.2 |
| 472.3042 | 20.4135  | 20.3615  | 20.59983 | 8  | 5 | 3 | 137834   | 479162.8 | 462982.4 |
| 680.2178 | 30.9645  | 30.95817 | 31.07967 | 5  | 4 | 1 | 51422.59 | 251512.9 | 113011.8 |
| 269.2479 | 30.54367 | 30.44717 | 30.55967 | 5  | 2 | 3 | 265113.8 | 2012886  | 1251870  |
| 412.2331 | 23.48783 | 23.399   | 23.48867 | 3  | 3 | 0 | 67182.48 | 204424.3 | 262087.2 |
| 312.1615 | 22.74708 | 22.70783 | 22.78383 | 10 | 5 | 5 | 652828.1 | 1888444  | 2874064  |
| 623.8912 | 10.84331 | 10.7482  | 10.93685 | 8  | 3 | 5 | 224268.6 | 289003   | 431707.4 |
| 310.2439 | 17.2135  | 17.17867 | 17.254   | 9  | 4 | 5 | 366846.4 | 1459806  | 1499584  |
| 334.4787 | 8.699883 | 8.4609   | 8.7677   | 5  | 3 | 2 | 170737.9 | 406845.9 | 492300.8 |
| 659.9702 | 43.20167 | 43.1435  | 43.23317 | 9  | 5 | 4 | 76509.98 | 658102.7 | 132107.4 |
| 239.1644 | 17.43833 | 17.35567 | 17.46833 | 8  | 4 | 4 | 340856.6 | 2690257  | 2684789  |
| 337.1051 | 23.58183 | 23.49167 | 23.61983 | 9  | 4 | 5 | 509009.7 | 1477559  | 2037168  |
| 782.1514 | 9.511617 | 9.474117 | 9.537367 | 4  | 1 | 3 | 3475942  | 5637687  | 12368070 |
| 848.5967 | 36.69575 | 36.65217 | 36.74517 | 4  | 1 | 3 | 20692.41 | 60833.9  | 14103.86 |
| 853.6036 | 11.26257 | 11.2505  | 11.29537 | 4  | 1 | 3 | 143647.5 | 141516.9 | 206891.8 |
| 385.0024 | 18.13833 | 18.07617 | 18.16983 | 7  | 3 | 4 | 296673.2 | 1523765  | 2182022  |
| 350.7087 | 9.081967 | 8.954783 | 9.142017 | 3  | 3 | 0 | 219654.3 | 309062.4 | 367973   |
| 790.5539 | 31.88425 | 31.86833 | 31.90567 | 10 | 5 | 5 | 665544.8 | 2931729  | 3313914  |
| 688.1604 | 31.023   | 30.92133 | 31.07383 | 4  | 1 | 3 | 181308.3 | 363506.2 | 191341.4 |
| 515.354  | 10.79319 | 10.7553  | 10.82177 | 6  | 3 | 3 | 268697.1 | 479397.3 | 663422   |
| 892.6222 | 33.92558 | 33.869   | 33.95083 | 10 | 5 | 5 | 341117.8 | 1627853  | 1974945  |

|          |          |          |          |    |   |   |          |          |          |
|----------|----------|----------|----------|----|---|---|----------|----------|----------|
| 555.0227 | 27.17867 | 27.11533 | 27.20067 | 5  | 2 | 3 | 99641.23 | 323445   | 441588.8 |
| 459.2472 | 23.78017 | 23.68533 | 23.79717 | 9  | 5 | 4 | 622034.8 | 1465391  | 2699593  |
| 841.5734 | 29.75917 | 29.74033 | 29.80217 | 10 | 5 | 5 | 188061.9 | 2108042  | 425202.4 |
| 725.415  | 41.19317 | 41.13233 | 41.23617 | 10 | 5 | 5 | 127389.7 | 572825.9 | 476449.5 |
| 360.2443 | 22.3475  | 22.31083 | 22.37883 | 5  | 2 | 3 | 62877.96 | 310890.9 | 202262.5 |
| 249.1829 | 21.54983 | 21.484   | 21.58117 | 5  | 2 | 3 | 135273.4 | 619946.9 | 704557.1 |
| 416.2156 | 21.49983 | 21.39833 | 21.52233 | 9  | 5 | 4 | 1372133  | 3591529  | 3192961  |
| 344.1578 | 29.34433 | 29.24733 | 29.38067 | 7  | 3 | 4 | 338475.3 | 1941223  | 1802107  |
| 317.231  | 25.90217 | 25.8205  | 25.9325  | 8  | 4 | 4 | 186765.5 | 522508.4 | 715723.5 |
| 393.3116 | 18.939   | 18.90983 | 18.967   | 10 | 5 | 5 | 51547500 | 2.99E+08 | 2.85E+08 |
| 275.2373 | 28.55267 | 28.49833 | 28.59983 | 6  | 3 | 3 | 115168.8 | 422977   | 381569.6 |
| 593.8918 | 9.43065  | 9.186383 | 9.55075  | 7  | 2 | 4 | 31969794 | 34448120 | 58959462 |
| 376.3048 | 18.93883 | 18.90983 | 18.95317 | 10 | 5 | 5 | 425364.5 | 2039393  | 2044690  |
| 480.3091 | 31.15833 | 31.07283 | 31.2445  | 4  | 1 | 3 | 137138.1 | 764623.8 | 566941.3 |
| 698.9691 | 9.510517 | 9.473767 | 9.537367 | 4  | 1 | 3 | 12897901 | 20564819 | 29056118 |
| 334.2748 | 19.49408 | 19.46033 | 19.5185  | 8  | 3 | 5 | 518378.8 | 1388727  | 1697526  |
| 207.1857 | 24.586   | 24.57617 | 24.61617 | 5  | 2 | 3 | 37177.57 | 131488.6 | 112271.6 |
| 411.239  | 9.663817 | 9.365883 | 9.76485  | 6  | 5 | 0 | 2236736  | 2756938  | 3039475  |
| 433.3192 | 34.068   | 33.84567 | 34.11217 | 9  | 3 | 5 | 306647.6 | 977349.2 | 1265281  |
| 1063.675 | 29.17742 | 29.15517 | 29.2705  | 6  | 3 | 3 | 434937.9 | 726591.5 | 1240137  |
| 228.0447 | 21.69342 | 21.57183 | 21.74217 | 8  | 3 | 5 | 197734.3 | 652667.3 | 791944.4 |
| 268.0633 | 11.8806  | 11.84128 | 12.02113 | 5  | 2 | 3 | 550556.3 | 1588616  | 3116131  |
| 298.1106 | 13.0223  | 12.96243 | 13.12275 | 9  | 4 | 5 | 1699880  | 2993805  | 4926876  |
| 563.378  | 22.54725 | 22.49    | 22.57533 | 10 | 5 | 5 | 864353.1 | 2308066  | 3128455  |
| 375.0072 | 18.1585  | 17.9835  | 18.1995  | 5  | 1 | 3 | 107450.5 | 439842.4 | 436944.1 |
| 432.3426 | 39.25567 | 39.20833 | 39.2825  | 4  | 0 | 4 | 211086.9 | 990730.5 | 222448.9 |
| 520.3331 | 9.068567 | 8.92085  | 9.114417 | 7  | 5 | 2 | 3816972  | 6611098  | 6461450  |
| 307.2487 | 18.30492 | 18.25767 | 18.34183 | 10 | 5 | 5 | 1187707  | 6727012  | 8259773  |
| 643.4694 | 17.237   | 17.22383 | 17.254   | 3  | 0 | 3 | 51398.95 | 92902.94 | 85732.83 |
| 314.281  | 9.329158 | 9.08515  | 9.377433 | 6  | 3 | 3 | 1549968  | 2752925  | 2680688  |
| 415.0348 | 21.15208 | 21.13817 | 21.17683 | 4  | 0 | 4 | 93719.13 | 237915.4 | 274825.4 |
| 437.2074 | 29.65433 | 29.57833 | 29.712   | 8  | 5 | 3 | 107487.5 | 566246.9 | 481551.3 |
| 391.9519 | 12.75845 | 12.71343 | 12.84028 | 5  | 1 | 4 | 402314.2 | 1046634  | 2248033  |
| 736.1601 | 29.24258 | 29.19917 | 29.31467 | 4  | 1 | 3 | 232535.4 | 207568.6 | 53140.15 |
| 1087.676 | 29.18517 | 29.16983 | 29.23333 | 5  | 3 | 2 | 771673.3 | 1790452  | 3016928  |
| 928.623  | 29.68158 | 29.66617 | 29.72733 | 10 | 5 | 5 | 97714.05 | 936811.5 | 193099.9 |
| 360.7673 | 9.185883 | 8.9037   | 9.2529   | 4  | 3 | 1 | 1186962  | 1887877  | 3248035  |
| 183.0217 | 21.43525 | 21.31517 | 21.46383 | 6  | 2 | 4 | 2757988  | 3490717  | 2667919  |
| 507.1735 | 10.70398 | 10.63273 | 10.78962 | 8  | 3 | 5 | 839092.6 | 2077406  | 3405514  |
| 434.8768 | 10.99405 | 10.85075 | 11.09677 | 3  | 0 | 3 | 104788.7 | 189274.3 | 364778.9 |
| 352.3582 | 22.37025 | 22.31083 | 22.3935  | 6  | 2 | 4 | 43227.82 | 91017.01 | 122760.3 |
| 225.6128 | 9.531333 | 9.52075  | 9.537367 | 3  | 0 | 3 | 4753363  | 3589508  | 7261580  |
| 295.1755 | 9.49235  | 9.473767 | 9.5558   | 5  | 2 | 3 | 1952050  | 2564132  | 3572626  |
| 339.1372 | 13.03677 | 12.96243 | 13.12275 | 9  | 4 | 5 | 1490349  | 2655004  | 4393812  |
| 393.2869 | 19.73675 | 19.71067 | 19.8     | 8  | 4 | 4 | 590501.6 | 2099839  | 2662558  |
| 238.0731 | 15.86583 | 15.80735 | 15.89132 | 5  | 1 | 4 | 150422.9 | 590579.2 | 953807.8 |
| 253.064  | 11.05917 | 10.8821  | 11.1144  | 8  | 3 | 5 | 2408659  | 10068122 | 17337755 |

|          |          |          |          |    |   |   |          |          |          |
|----------|----------|----------|----------|----|---|---|----------|----------|----------|
| 334.2384 | 20.97267 | 20.846   | 21.0485  | 11 | 5 | 5 | 9403262  | 49964644 | 43529426 |
| 533.0232 | 18.12058 | 18.07617 | 18.158   | 6  | 2 | 4 | 265554.5 | 636560.6 | 1113132  |
| 350.0827 | 19.35375 | 19.30917 | 19.37883 | 6  | 4 | 2 | 43377.07 | 204221.5 | 146273   |
| 341.6097 | 29.25708 | 29.199   | 29.2755  | 4  | 1 | 3 | 71841.88 | 209856.8 | 252233.9 |
| 533.0088 | 30.777   | 30.474   | 30.84967 | 6  | 1 | 4 | 236032.6 | 598817.7 | 955407.7 |
| 562.3758 | 19.18383 | 19.1455  | 19.20017 | 5  | 2 | 3 | 39611.48 | 83314.54 | 114209.1 |
| 412.1575 | 24.34283 | 24.267   | 24.3575  | 7  | 2 | 5 | 232322.9 | 708335.6 | 955394   |
| 494.1001 | 18.13192 | 18.089   | 18.21483 | 6  | 3 | 3 | 167819.4 | 485084.2 | 738405   |
| 554.3083 | 25.47575 | 25.43583 | 25.51083 | 8  | 3 | 5 | 344627.8 | 775114.1 | 1402125  |
| 389.023  | 22.10392 | 22.08717 | 22.14433 | 6  | 2 | 4 | 70041.05 | 229707.9 | 260118.5 |
| 399.0181 | 22.14983 | 22.05267 | 22.201   | 7  | 2 | 5 | 276878.6 | 1286205  | 1812733  |
| 715.3347 | 33.728   | 33.68233 | 33.75883 | 5  | 3 | 2 | 54551.82 | 128775.4 | 175402.8 |
| 444.0772 | 28.015   | 28.01383 | 28.02867 | 5  | 2 | 3 | 47298.73 | 109944.4 | 166042.8 |
| 848.5959 | 34.07067 | 34.00583 | 34.083   | 10 | 5 | 5 | 889944   | 4234952  | 5124139  |
| 442.3895 | 34.5655  | 34.51167 | 34.58683 | 7  | 5 | 2 | 23651.02 | 94625.29 | 50637.72 |
| 464.249  | 43.63033 | 43.57217 | 43.7805  | 5  | 3 | 1 | 86947.38 | 1456665  | 695710.7 |
| 373.2933 | 33.92083 | 33.89583 | 33.936   | 5  | 2 | 3 | 88468.64 | 268816.9 | 369207.3 |
| 191.1644 | 11.70925 | 11.57727 | 11.89242 | 8  | 3 | 4 | 453837.5 | 1070598  | 983678.5 |
| 312.9801 | 16.94642 | 16.87717 | 16.98567 | 10 | 5 | 5 | 6782609  | 28524010 | 47705725 |
| 392.2074 | 11.91279 | 11.8855  | 12.119   | 6  | 1 | 5 | 115358.1 | 477209.7 | 469206.8 |
| 418.3166 | 40.31183 | 40.25067 | 40.3475  | 7  | 3 | 4 | 691619.2 | 3632358  | 3981463  |
| 811.3806 | 23.72775 | 23.6145  | 23.7675  | 6  | 4 | 2 | 111979   | 308040.7 | 393493.3 |
| 1088.679 | 29.18433 | 29.16983 | 29.31467 | 6  | 3 | 3 | 456745.3 | 1042575  | 1704497  |
| 614.4486 | 32.1255  | 32.10233 | 32.16117 | 10 | 5 | 5 | 2801236  | 12392431 | 14296904 |
| 342.301  | 17.53842 | 17.529   | 17.5895  | 6  | 2 | 4 | 99849.16 | 319443.5 | 385603.5 |
| 411.0084 | 22.10083 | 22.03867 | 22.13033 | 3  | 3 | 0 | 50145.46 | 88708.18 | 121146.1 |
| 594.2961 | 10.70276 | 10.65043 | 10.77118 | 4  | 1 | 3 | 308252.9 | 445297.4 | 758055.7 |
| 234.2149 | 24.944   | 24.86167 | 24.97667 | 5  | 2 | 3 | 48675.68 | 137933   | 179855.5 |
| 284.1862 | 16.47208 | 16.40767 | 16.51398 | 8  | 4 | 4 | 78295.99 | 468625.8 | 442960   |
| 500.3797 | 23.0705  | 22.98717 | 23.09017 | 6  | 3 | 3 | 137213.8 | 258268.5 | 302873.4 |
| 254.2504 | 13.11545 | 13.09522 | 13.16655 | 7  | 3 | 4 | 38899.13 | 130522.3 | 143830.1 |
| 494.2404 | 17.60433 | 17.58967 | 17.6205  | 5  | 1 | 4 | 128643.1 | 351039.2 | 509130.4 |
| 517.1369 | 23.18175 | 23.10367 | 23.196   | 8  | 3 | 5 | 299537   | 882587.4 | 1227570  |
| 570.4584 | 36.412   | 36.36867 | 36.472   | 5  | 2 | 3 | 386178.1 | 3029064  | 3202669  |
| 406.132  | 18.42417 | 18.38883 | 18.45433 | 7  | 3 | 4 | 329329.8 | 1349545  | 1859769  |
| 484.3005 | 9.20005  | 9.101033 | 9.236417 | 5  | 3 | 2 | 13339558 | 10168299 | 17360969 |
| 170.1654 | 13.13668 | 13.10962 | 13.23298 | 9  | 4 | 5 | 163140.4 | 565534.2 | 692846.7 |
| 824.6095 | 31.41058 | 31.37217 | 31.46433 | 10 | 5 | 5 | 164556.5 | 836539   | 430217.1 |
| 389.9945 | 15.9387  | 15.86012 | 15.95405 | 3  | 0 | 3 | 37007.51 | 98848.95 | 156514.8 |
| 322.2859 | 18.967   | 18.9085  | 18.98483 | 9  | 4 | 5 | 311404.9 | 1135213  | 1295659  |
| 280.1628 | 30.47117 | 30.34733 | 30.50117 | 7  | 2 | 5 | 11766427 | 50849477 | 64442295 |
| 549.3044 | 40.2055  | 40.0165  | 40.23733 | 6  | 4 | 2 | 100758   | 580914.8 | 678082.3 |
| 545.173  | 10.68608 | 10.63273 | 10.75237 | 6  | 2 | 4 | 437746.8 | 1090354  | 1785855  |
| 291.1998 | 10.02258 | 9.93755  | 10.049   | 5  | 2 | 3 | 179038.2 | 145754.5 | 171358.2 |
| 590.0532 | 22.13317 | 22.05267 | 22.14983 | 6  | 2 | 4 | 171233.8 | 382035.1 | 689934.3 |
| 151.1482 | 21.54983 | 21.44083 | 21.6105  | 7  | 3 | 4 | 75294.49 | 423601   | 394413.4 |
| 495.8897 | 31.19783 | 31.13967 | 31.2305  | 3  | 0 | 3 | 87926.27 | 129414.2 | 62248.62 |

|          |          |          |          |    |   |   |          |          |          |
|----------|----------|----------|----------|----|---|---|----------|----------|----------|
| 211.1525 | 10.41965 | 10.3514  | 10.45412 | 7  | 2 | 5 | 2868243  | 10062187 | 8745494  |
| 418.2593 | 22.58292 | 22.26717 | 22.70883 | 6  | 2 | 3 | 135911.2 | 568558.7 | 118926.7 |
| 351.2497 | 8.6514   | 8.3878   | 8.66985  | 5  | 2 | 3 | 304343   | 862990.4 | 1067821  |
| 549.4021 | 10.07062 | 10.01772 | 10.08285 | 7  | 4 | 3 | 281459.3 | 556336.1 | 784456.8 |
| 557.0762 | 26.653   | 26.626   | 26.699   | 6  | 2 | 4 | 75278.73 | 130580   | 193881.1 |
| 659.5142 | 35.1325  | 35.09967 | 35.19117 | 5  | 2 | 3 | 319740.8 | 3255974  | 3368573  |
| 565.2087 | 29.12633 | 29.11083 | 29.18217 | 5  | 2 | 3 | 63851.19 | 173963.5 | 178013.4 |
| 354.0066 | 16.943   | 16.88917 | 16.98567 | 10 | 5 | 5 | 2432645  | 9684114  | 16264611 |
| 404.139  | 26.17883 | 26.1145  | 26.22817 | 5  | 1 | 4 | 42868.18 | 201003.9 | 136429.5 |
| 1106.616 | 10.66397 | 10.64782 | 10.66922 | 5  | 2 | 3 | 847254   | 587631.4 | 932449.2 |
| 426.1371 | 15.66027 | 15.61342 | 15.7074  | 9  | 4 | 5 | 390446.3 | 1250345  | 2143625  |
| 250.238  | 24.93467 | 24.86333 | 24.94967 | 7  | 3 | 4 | 185274.6 | 537786.5 | 755796.9 |
| 242.0841 | 21.14367 | 21.10917 | 21.15517 | 4  | 1 | 3 | 54328    | 115026.8 | 160645   |
| 450.1666 | 27.24158 | 27.208   | 27.35483 | 4  | 0 | 3 | 30859.67 | 92987.44 | 49473.69 |
| 366.1367 | 11.48274 | 11.45732 | 11.7007  | 4  | 1 | 3 | 141651.9 | 437128.8 | 646411.6 |
| 770.1917 | 29.12633 | 29.08283 | 29.163   | 5  | 2 | 3 | 135309.2 | 315800.5 | 465520.4 |
| 531.0404 | 15.64528 | 15.59717 | 15.65558 | 5  | 1 | 4 | 212553.4 | 625666.1 | 1253817  |
| 538.3494 | 26.99883 | 26.97067 | 27.03083 | 9  | 5 | 4 | 135375.3 | 483493.5 | 465413.8 |
| 228.0959 | 10.3978  | 10.33325 | 10.44835 | 9  | 5 | 4 | 47839612 | 93813134 | 1.64E+08 |
| 470.1997 | 26.65233 | 26.60517 | 26.6795  | 6  | 2 | 4 | 52111.79 | 88544.06 | 116796   |
| 575.2677 | 30.93633 | 30.8925  | 31.017   | 5  | 1 | 4 | 191694.3 | 671590   | 638286.3 |
| 359.0892 | 24.5985  | 24.56467 | 24.66767 | 4  | 1 | 3 | 47569.8  | 138172.6 | 172697.6 |
| 437.1891 | 33.28425 | 33.25783 | 33.32083 | 8  | 3 | 5 | 758107.5 | 2359439  | 3812438  |
| 277.2163 | 29.95333 | 29.90533 | 29.95983 | 4  | 3 | 1 | 413743.7 | 1430731  | 738576.8 |
| 412.7672 | 23.18183 | 23.09983 | 23.20917 | 9  | 4 | 5 | 43642.38 | 197258   | 174249.7 |
| 362.2431 | 9.541233 | 9.474117 | 9.572217 | 5  | 5 | 0 | 7426318  | 13167087 | 15178846 |
| 543.3763 | 11.20929 | 11.17687 | 11.30227 | 8  | 3 | 5 | 144566   | 480088.7 | 423396.6 |
| 348.1807 | 35.08083 | 35.02583 | 35.1035  | 6  | 3 | 3 | 52449.4  | 454250.5 | 317761.3 |
| 376.3135 | 34.3555  | 34.33717 | 34.4685  | 7  | 3 | 4 | 1083883  | 2640385  | 1226063  |
| 271.087  | 22.12067 | 22.107   | 22.1735  | 8  | 5 | 3 | 95055.2  | 221919.3 | 151716.6 |
| 625.2696 | 22.12592 | 22.05267 | 22.14983 | 6  | 2 | 4 | 2150009  | 4370504  | 6790164  |
| 304.2641 | 16.34058 | 16.30098 | 16.39957 | 5  | 2 | 3 | 252813   | 780729.5 | 1039365  |
| 333.91   | 16.93567 | 16.893   | 16.96167 | 4  | 1 | 3 | 66002.53 | 167700.8 | 304581.3 |
| 530.1451 | 31.6715  | 31.56967 | 31.69283 | 7  | 3 | 4 | 138014.7 | 427192.1 | 629534.3 |
| 291.1958 | 35.76767 | 35.66867 | 35.785   | 5  | 2 | 3 | 39128.91 | 227192.3 | 67501.7  |
| 268.0827 | 13.73812 | 13.63752 | 13.76748 | 5  | 1 | 4 | 143863.2 | 517960.2 | 848530.2 |
| 658.4749 | 32.07258 | 32.04317 | 32.08817 | 10 | 5 | 5 | 2504934  | 12019342 | 14026893 |
| 543.1385 | 22.11867 | 22.03667 | 22.14983 | 6  | 2 | 4 | 267728.4 | 794741.8 | 1145812  |
| 546.4637 | 21.769   | 21.64633 | 21.77133 | 5  | 2 | 3 | 108186.3 | 329034.4 | 337819.4 |
| 415.2119 | 23.54475 | 23.4435  | 23.56717 | 6  | 4 | 2 | 3328445  | 14511438 | 16627772 |
| 558.4223 | 16.89217 | 16.84967 | 16.9155  | 7  | 2 | 5 | 138728.4 | 1343283  | 1487759  |
| 279.1595 | 30.47117 | 30.34733 | 30.50117 | 7  | 2 | 5 | 65211452 | 2.85E+08 | 3.58E+08 |
| 362.7998 | 31.13633 | 31.08133 | 31.48817 | 11 | 5 | 5 | 2318621  | 5693407  | 5960259  |
| 491.3026 | 8.745408 | 8.4531   | 8.85025  | 4  | 3 | 1 | 4555565  | 15473002 | 21726772 |
| 389.9951 | 18.13525 | 18.07617 | 18.18483 | 6  | 2 | 4 | 149227.7 | 790650.9 | 1058092  |
| 851.6378 | 35.04025 | 35.0145  | 35.15933 | 10 | 5 | 5 | 126488.6 | 991375.7 | 490174.3 |
| 418.0337 | 21.1455  | 21.13467 | 21.15517 | 4  | 1 | 3 | 103832.1 | 235427.3 | 347513.7 |

|          |          |          |          |    |   |   |          |          |          |
|----------|----------|----------|----------|----|---|---|----------|----------|----------|
| 537.3174 | 42.67667 | 42.59283 | 42.73217 | 8  | 5 | 3 | 1832895  | 4204300  | 2958148  |
| 541.4145 | 35.47067 | 35.42017 | 35.5025  | 9  | 4 | 5 | 444201   | 2185815  | 2490033  |
| 672.4933 | 10.86473 | 10.806   | 10.87913 | 5  | 2 | 3 | 643809.4 | 822191.6 | 1342166  |
| 465.3427 | 32.29125 | 32.26967 | 32.32533 | 8  | 3 | 5 | 142632.3 | 488788.7 | 541315.5 |
| 925.2808 | 10.68993 | 10.63273 | 10.75237 | 6  | 2 | 4 | 993352.6 | 2178019  | 4425699  |
| 430.7897 | 21.25975 | 21.1695  | 21.2755  | 8  | 3 | 5 | 185139.1 | 391233   | 650975.4 |
| 287.0819 | 21.68633 | 21.5865  | 21.7275  | 6  | 2 | 4 | 375906.9 | 1626329  | 1633914  |
| 350.1063 | 31.00867 | 30.979   | 31.06583 | 5  | 2 | 3 | 103761   | 173471.3 | 269526.3 |
| 633.0612 | 34.96208 | 34.9395  | 34.99983 | 4  | 1 | 3 | 23931.05 | 82809.56 | 85153.57 |
| 621.2699 | 29.14417 | 29.1255  | 29.18433 | 6  | 2 | 4 | 57996.71 | 115612.3 | 164233.6 |
| 313.1921 | 14.55006 | 14.46363 | 14.59203 | 6  | 2 | 4 | 61817.25 | 137127.4 | 160252.6 |
| 332.2226 | 14.02423 | 13.96152 | 14.0592  | 4  | 1 | 3 | 127242.4 | 745677.7 | 581667.6 |
| 474.298  | 38.61817 | 38.61683 | 38.62683 | 3  | 0 | 3 | 78896.63 | 177024.3 | 28458.41 |
| 511.1812 | 10.40768 | 10.37973 | 10.66553 | 8  | 4 | 4 | 572519.6 | 828624.4 | 809370.7 |
| 431.1159 | 15.65998 | 15.59003 | 15.68465 | 7  | 3 | 4 | 128049.5 | 433459.6 | 812976.8 |
| 294.207  | 14.80298 | 14.76275 | 14.90665 | 7  | 3 | 4 | 101397.8 | 541871.3 | 494550   |
| 328.9358 | 13.34403 | 13.22265 | 13.35967 | 7  | 3 | 4 | 431019.6 | 1695331  | 3034167  |
| 285.0788 | 19.57117 | 19.515   | 19.58533 | 7  | 3 | 4 | 110557.6 | 470314   | 598963.2 |
| 499.9367 | 16.96    | 16.893   | 16.96783 | 6  | 2 | 4 | 196265.3 | 585811.1 | 1221704  |
| 369.2714 | 9.52155  | 9.4881   | 9.5558   | 4  | 1 | 3 | 5410326  | 8494028  | 13319160 |
| 401.29   | 40.31083 | 40.26633 | 40.363   | 8  | 4 | 4 | 521417.9 | 2578664  | 2895238  |
| 426.3945 | 32.88858 | 32.85867 | 32.94183 | 8  | 3 | 5 | 95111.09 | 305592.5 | 311322.7 |
| 327.2855 | 9.187083 | 8.9705   | 9.460417 | 9  | 5 | 3 | 11750120 | 27779533 | 20437661 |
| 592.2398 | 28.533   | 28.5135  | 28.571   | 3  | 3 | 0 | 52774.25 | 204747.7 | 176660.7 |
| 646.4805 | 25.24067 | 25.109   | 25.3595  | 7  | 2 | 4 | 160778.3 | 799452.2 | 879682.4 |
| 526.2936 | 29.064   | 29.01    | 29.12267 | 5  | 2 | 3 | 680286.8 | 2551797  | 2563007  |
| 834.5809 | 21.082   | 21.04633 | 21.12583 | 5  | 2 | 3 | 169350.7 | 780954.1 | 855454.2 |
| 602.4121 | 21.39517 | 21.31517 | 21.4365  | 9  | 4 | 5 | 181426.6 | 496533.1 | 595921.1 |
| 217.1803 | 20.43817 | 20.3965  | 20.56367 | 7  | 3 | 4 | 513114.7 | 2251602  | 1526748  |
| 496.364  | 19.93558 | 19.9225  | 20.05783 | 10 | 5 | 5 | 406118.8 | 1276844  | 1341561  |
| 593.3902 | 9.391058 | 9.186383 | 9.460417 | 6  | 2 | 4 | 47056296 | 54234980 | 96316542 |
| 431.0057 | 22.99025 | 22.98083 | 23.01883 | 6  | 2 | 4 | 149605.3 | 445507.2 | 701903.4 |
| 280.2638 | 35.68933 | 35.67817 | 35.714   | 9  | 4 | 5 | 176293.5 | 694769.9 | 809721.5 |
| 239.1281 | 24.59625 | 24.5315  | 24.60883 | 6  | 2 | 4 | 335756   | 1769690  | 996668.1 |
| 433.1317 | 14.54815 | 14.27835 | 14.61573 | 9  | 3 | 5 | 1176753  | 4647381  | 8169235  |
| 384.5565 | 27.50967 | 27.44283 | 27.52983 | 4  | 0 | 4 | 40895.29 | 105232.6 | 152115.1 |
| 514.3597 | 21.06517 | 21.02017 | 21.08183 | 5  | 2 | 3 | 111590.6 | 415084   | 476352.4 |
| 718.5217 | 7.281467 | 7.207417 | 7.29805  | 5  | 2 | 3 | 468090   | 328510.5 | 329824.9 |
| 406.8399 | 9.6661   | 9.3228   | 9.751083 | 6  | 3 | 2 | 719981.4 | 583029.8 | 652470.9 |
| 665.2934 | 22.12592 | 22.05267 | 22.14983 | 6  | 2 | 4 | 935619.3 | 2079139  | 3186419  |
| 398.1659 | 37.00783 | 36.99183 | 37.03467 | 3  | 0 | 3 | 91129.93 | 448732.1 | 141124.9 |
| 209.1653 | 9.187083 | 8.904467 | 9.280533 | 7  | 4 | 3 | 7204398  | 21864044 | 14729499 |
| 519.139  | 42.74367 | 42.67717 | 42.74867 | 5  | 2 | 3 | 76028.9  | 524178.7 | 216706.9 |
| 505.3141 | 28.79    | 28.76083 | 28.81017 | 5  | 2 | 3 | 33989.05 | 85352.15 | 77716.84 |
| 242.0532 | 22.98233 | 22.928   | 23.0335  | 10 | 5 | 5 | 656698.4 | 2333484  | 2709768  |
| 630.7653 | 16.943   | 16.9215  | 16.97683 | 4  | 1 | 3 | 73670.29 | 181824.5 | 385917.1 |
| 724.5932 | 30.65475 | 30.61667 | 30.66617 | 6  | 3 | 3 | 838465.6 | 1712030  | 1219878  |



|          |          |          |          |    |   |   |          |          |          |
|----------|----------|----------|----------|----|---|---|----------|----------|----------|
| 305.2116 | 33.0595  | 33.05117 | 33.1135  | 4  | 0 | 4 | 720965.9 | 2663993  | 3489162  |
| 615.4419 | 43.45942 | 43.44017 | 43.50017 | 10 | 5 | 5 | 303605.5 | 3448148  | 925628.2 |
| 441.1276 | 13.20193 | 13.16952 | 13.22683 | 7  | 4 | 3 | 87700.32 | 321822.4 | 349942.3 |
| 896.4157 | 25.60925 | 25.57583 | 25.64467 | 10 | 5 | 5 | 437016.5 | 1222899  | 1598597  |
| 771.4081 | 9.534967 | 9.488017 | 9.57335  | 5  | 2 | 3 | 16703601 | 28803763 | 42171787 |
| 536.3716 | 34.3025  | 34.234   | 34.41283 | 8  | 4 | 4 | 318958.6 | 1936298  | 1374105  |
| 286.1081 | 14.67448 | 14.62222 | 14.79963 | 10 | 5 | 5 | 1606935  | 11765704 | 11462507 |
| 470.3751 | 15.87836 | 15.82778 | 15.92422 | 8  | 3 | 5 | 204644   | 389981   | 492700.2 |
| 314.2696 | 26.81708 | 26.77933 | 26.87017 | 4  | 1 | 3 | 69020.21 | 374196.3 | 352383.2 |
| 255.0706 | 19.23467 | 19.21983 | 19.24367 | 5  | 3 | 2 | 43291.44 | 143125.4 | 91573.26 |
| 359.807  | 9.527133 | 9.47815  | 9.543383 | 4  | 1 | 3 | 6542891  | 8886630  | 17490855 |
| 457.1977 | 15.0017  | 14.96548 | 15.02647 | 4  | 1 | 3 | 41112.88 | 75130.76 | 73913.49 |
| 434.3317 | 23.17983 | 23.10367 | 23.19433 | 5  | 2 | 3 | 29098.52 | 100325.4 | 72063.05 |
| 313.9835 | 16.93092 | 16.893   | 16.97683 | 8  | 3 | 5 | 965423.8 | 3405901  | 5987859  |
| 413.2781 | 13.84645 | 13.79135 | 13.8838  | 6  | 2 | 4 | 178572.7 | 555865.2 | 654744   |
| 311.1581 | 22.74633 | 22.70783 | 22.78383 | 10 | 5 | 5 | 4835268  | 17208709 | 24026031 |
| 356.1978 | 28.11783 | 28.04433 | 28.14683 | 5  | 2 | 3 | 47753.85 | 106456   | 132222.6 |
| 224.1192 | 18.9245  | 18.90983 | 18.96767 | 7  | 2 | 5 | 437606.3 | 1573165  | 2068667  |
| 682.3643 | 41.193   | 41.16333 | 41.25083 | 9  | 5 | 4 | 194644.4 | 1336812  | 977473.6 |
| 351.1738 | 35.19083 | 35.14433 | 35.22067 | 7  | 2 | 5 | 101540.1 | 354478.2 | 432066.9 |
| 375.9857 | 9.52075  | 9.473767 | 9.537367 | 3  | 0 | 3 | 8180356  | 9666365  | 19441616 |
| 504.3062 | 28.3985  | 28.34867 | 28.52867 | 9  | 5 | 4 | 206971.8 | 588342.6 | 771922.2 |
| 319.201  | 19.36417 | 19.32383 | 19.39583 | 9  | 4 | 5 | 360313.2 | 1181228  | 1362140  |
| 503.2434 | 20.42283 | 20.382   | 20.59983 | 5  | 2 | 3 | 82968.3  | 80688.46 | 92933.89 |
| 484.9183 | 22.07917 | 21.7505  | 22.136   | 7  | 3 | 4 | 70912.45 | 127055.5 | 99281.23 |
| 244.2639 | 25.61292 | 25.577   | 25.62817 | 6  | 3 | 3 | 48106.96 | 111448   | 119628.3 |
| 370.2595 | 13.5386  | 13.45678 | 13.58083 | 6  | 3 | 3 | 160649.8 | 769091   | 683315.5 |
| 395.9904 | 18.153   | 18.1035  | 18.16983 | 9  | 5 | 4 | 237408.6 | 1305205  | 1389411  |
| 365.3095 | 39.98342 | 39.89267 | 39.99683 | 6  | 2 | 4 | 68785.63 | 308221.2 | 238188.2 |
| 530.9937 | 32.1315  | 32.07333 | 32.13533 | 3  | 0 | 3 | 59836.91 | 77442.5  | 167983.8 |
| 506.1704 | 10.69325 | 10.58428 | 10.77118 | 7  | 3 | 4 | 4388379  | 12266457 | 21450786 |
| 556.4493 | 38.66917 | 38.61683 | 38.77433 | 7  | 3 | 4 | 65191.48 | 270581.7 | 141436.5 |
| 387.126  | 26.63917 | 26.601   | 26.69383 | 7  | 2 | 5 | 160455.5 | 578188.6 | 763739.3 |
| 622.8988 | 10.84151 | 10.7482  | 10.9188  | 10 | 5 | 5 | 628137.7 | 975251.7 | 1445818  |
| 330.9566 | 13.7406  | 13.6964  | 13.782   | 5  | 1 | 4 | 310703.4 | 1026589  | 2038663  |
| 350.1056 | 18.83467 | 18.7745  | 18.87783 | 7  | 3 | 4 | 1867043  | 3315205  | 6920330  |
| 476.3375 | 20.29067 | 20.28117 | 20.43133 | 5  | 1 | 4 | 90536.16 | 350051.8 | 155084.5 |
| 350.2333 | 14.55197 | 14.48403 | 14.66112 | 9  | 4 | 5 | 461813.4 | 3072440  | 2937700  |
| 833.4755 | 9.395833 | 9.337217 | 9.543383 | 5  | 3 | 2 | 737920.2 | 567001.3 | 629752.3 |
| 1007.772 | 27.649   | 27.40283 | 27.76167 | 8  | 3 | 4 | 186722.8 | 1465286  | 1409946  |
| 437.7399 | 35.17592 | 35.147   | 35.21983 | 10 | 5 | 5 | 104791.3 | 461954.5 | 406734.3 |
| 224.2189 | 15.63067 | 15.62647 | 15.67423 | 3  | 0 | 3 | 27227.17 | 107649.7 | 119589.3 |
| 300.2902 | 36.23975 | 36.19983 | 36.3255  | 10 | 5 | 5 | 391015.8 | 2484828  | 1494453  |
| 410.3382 | 18.93917 | 18.90983 | 18.98183 | 9  | 4 | 5 | 247065.2 | 1034999  | 955592.8 |
| 287.1115 | 22.48925 | 22.4575  | 22.542   | 6  | 3 | 3 | 48123.78 | 209009.2 | 90663.94 |
| 730.1387 | 30.51367 | 30.45967 | 30.562   | 5  | 1 | 4 | 84175.46 | 112593.2 | 223482.5 |
| 702.5375 | 35.07    | 35.03033 | 35.09983 | 7  | 3 | 4 | 1031589  | 10803749 | 11459796 |

|          |          |          |          |    |   |   |          |          |          |
|----------|----------|----------|----------|----|---|---|----------|----------|----------|
| 407.2914 | 9.778292 | 9.7121   | 9.925233 | 8  | 5 | 2 | 878199.1 | 1957344  | 1934331  |
| 504.9551 | 11.05848 | 10.8821  | 11.1144  | 4  | 1 | 3 | 101724.6 | 160501.5 | 349610.3 |
| 363.194  | 38.14633 | 38.093   | 38.22217 | 6  | 1 | 5 | 62420.97 | 228074.9 | 81423.58 |
| 734.9819 | 22.15117 | 22.1215  | 22.17817 | 3  | 0 | 3 | 72152.34 | 163547   | 305387.9 |
| 322.0252 | 17.14583 | 17.06583 | 17.16383 | 3  | 0 | 3 | 65456.35 | 166647   | 121070.1 |
| 645.4772 | 25.24708 | 25.168   | 25.33417 | 10 | 5 | 5 | 555852.5 | 2863659  | 3333908  |
| 436.2545 | 43.61692 | 43.57467 | 43.651   | 4  | 1 | 3 | 208316   | 3990879  | 827946.8 |
| 402.259  | 29.63942 | 29.57833 | 29.6805  | 6  | 3 | 3 | 109179.5 | 278051.5 | 192499.4 |
| 559.3896 | 21.24083 | 21.1695  | 21.28517 | 5  | 2 | 3 | 41946.66 | 73835.35 | 101987.6 |
| 371.299  | 33.17417 | 33.13983 | 33.222   | 5  | 2 | 3 | 212517.4 | 4036321  | 3127940  |
| 748.5434 | 28.79    | 28.75783 | 28.795   | 9  | 4 | 5 | 603058.4 | 2749928  | 3253669  |
| 316.2277 | 25.88608 | 25.80817 | 25.9325  | 10 | 5 | 5 | 1052256  | 3495059  | 4662851  |
| 442.4167 | 35.16858 | 35.14667 | 35.235   | 10 | 5 | 5 | 1206488  | 4926964  | 3715471  |
| 454.8491 | 9.91125  | 9.837283 | 10.08655 | 8  | 2 | 4 | 653945.6 | 815330.7 | 1060850  |
| 386.3811 | 23.25558 | 23.23817 | 23.31067 | 4  | 1 | 3 | 207372   | 425909.2 | 482373   |
| 214.09   | 15.63641 | 15.51292 | 15.78272 | 10 | 4 | 5 | 353210.3 | 2071444  | 984238.4 |
| 239.184  | 25.78433 | 25.71833 | 25.822   | 5  | 3 | 2 | 67667.81 | 255005.4 | 164469.9 |
| 746.5276 | 31.94242 | 31.92633 | 31.9765  | 10 | 5 | 5 | 1365376  | 5970686  | 6853265  |
| 235.1268 | 19.36892 | 19.32383 | 19.41817 | 10 | 5 | 5 | 814010   | 2911653  | 3437799  |
| 571.4981 | 29.111   | 29.09717 | 29.22633 | 5  | 3 | 2 | 64636.02 | 158986.6 | 183287.8 |
| 271.1141 | 10.72183 | 10.6177  | 10.76105 | 7  | 2 | 5 | 1672518  | 4062623  | 6778881  |
| 360.1812 | 28.795   | 28.66667 | 28.95133 | 9  | 3 | 5 | 935872.6 | 8886824  | 11890434 |
| 892.42   | 27.53033 | 27.4865  | 27.59083 | 4  | 1 | 3 | 38198.13 | 87097.01 | 107939.7 |
| 553.0031 | 19.35092 | 19.28517 | 19.37217 | 8  | 3 | 5 | 304734.1 | 923832   | 1495537  |
| 564.3815 | 22.54783 | 22.47367 | 22.58667 | 9  | 4 | 5 | 124787.4 | 290741.3 | 390578.7 |
| 591.3093 | 10.63273 | 10.59208 | 10.77118 | 5  | 1 | 4 | 621035.1 | 436620.7 | 635199.7 |
| 515.0458 | 26.63983 | 26.601   | 26.67933 | 7  | 2 | 5 | 193729.9 | 632186.7 | 855589.5 |
| 335.2448 | 9.208883 | 9.101033 | 9.266617 | 6  | 4 | 2 | 1273394  | 2895030  | 2165393  |
| 302.2694 | 24.21    | 24.195   | 24.29617 | 5  | 2 | 3 | 115263.1 | 854500.3 | 978036.2 |
| 163.0755 | 29.36933 | 29.2755  | 29.41    | 8  | 4 | 4 | 2158859  | 14088854 | 11833721 |
| 315.1099 | 20.44333 | 20.4255  | 20.6345  | 6  | 2 | 4 | 169596.5 | 457777   | 623456.9 |
| 493.2613 | 23.29708 | 23.26583 | 23.32617 | 4  | 4 | 0 | 36490.58 | 86541.44 | 67021.92 |
| 270.151  | 16.928   | 16.89817 | 16.94617 | 6  | 3 | 3 | 65461.16 | 160177.2 | 202822.1 |
| 421.3163 | 32.32075 | 32.2815  | 32.35533 | 6  | 3 | 3 | 92659.53 | 369932.9 | 343423.9 |
| 559.0913 | 20.93317 | 20.599   | 20.99367 | 7  | 2 | 4 | 440549.4 | 2832628  | 4229269  |
| 344.9725 | 15.89331 | 15.85927 | 15.90558 | 6  | 2 | 4 | 313801.9 | 1368800  | 2696268  |
| 290.8895 | 2.165333 | 2.004783 | 2.440967 | 9  | 5 | 3 | 175102.7 | 1294988  | 576677.6 |
| 572.3358 | 30.57367 | 30.56033 | 30.66183 | 10 | 5 | 5 | 269947.8 | 1240987  | 1177745  |
| 429.0263 | 18.153   | 18.089   | 18.1585  | 7  | 3 | 4 | 203811.9 | 1108514  | 1450500  |
| 466.025  | 17.28083 | 17.2105  | 17.3295  | 5  | 1 | 4 | 112328.2 | 382028.1 | 758871.9 |
| 681.9836 | 43.10142 | 42.97317 | 43.174   | 6  | 3 | 3 | 65840.43 | 386466.5 | 207194.7 |
| 910.43   | 28.94408 | 28.8675  | 28.98033 | 4  | 1 | 3 | 60411.64 | 133409.9 | 185968.5 |
| 493.2977 | 9.197542 | 9.101033 | 9.21955  | 4  | 3 | 1 | 974094.2 | 3092096  | 2620389  |
| 458.1644 | 10.70767 | 10.63273 | 10.75237 | 5  | 1 | 4 | 373832.9 | 958249.3 | 1557964  |
| 217.0525 | 15.87836 | 15.78665 | 15.90692 | 8  | 3 | 5 | 188906.7 | 1022984  | 1440489  |
| 478.1895 | 24.49217 | 24.41317 | 24.50533 | 6  | 2 | 4 | 67377.23 | 172918.3 | 252876.5 |
| 274.2535 | 19.42292 | 19.41317 | 19.46583 | 8  | 3 | 5 | 159611.2 | 470448.6 | 548217.1 |

|          |          |          |          |    |   |   |          |          |          |
|----------|----------|----------|----------|----|---|---|----------|----------|----------|
| 315.1099 | 21.13817 | 21.07017 | 21.17    | 7  | 2 | 5 | 239218.4 | 696854.8 | 977170.4 |
| 387.9996 | 18.1435  | 18.089   | 18.16983 | 7  | 3 | 4 | 395167.8 | 2267221  | 2971659  |
| 342.2434 | 25.14167 | 25.1035  | 25.18283 | 5  | 2 | 3 | 64764.88 | 184599.6 | 232110.5 |
| 584.0775 | 13.22147 | 13.1811  | 13.23695 | 4  | 1 | 3 | 76263.09 | 164972.2 | 342404.2 |
| 376.3137 | 34.8445  | 34.80733 | 34.952   | 10 | 5 | 5 | 2565517  | 7476249  | 3427014  |
| 425.7852 | 10.41382 | 10.39345 | 10.45412 | 8  | 3 | 5 | 927162.8 | 3512390  | 4076958  |
| 363.188  | 12.76533 | 12.70247 | 12.80665 | 4  | 1 | 3 | 123726.3 | 539037.8 | 479325   |
| 314.2387 | 28.43133 | 28.40317 | 28.44683 | 6  | 3 | 3 | 120777   | 391422.2 | 505909.4 |
| 395.1002 | 33.51817 | 33.50617 | 33.58233 | 4  | 0 | 4 | 56365.76 | 171045.3 | 193948.5 |
| 349.1937 | 9.506667 | 9.43065  | 9.537367 | 3  | 0 | 3 | 2661689  | 6274046  | 7332991  |
| 393.2419 | 18.9985  | 18.96767 | 19.0115  | 3  | 0 | 3 | 186111.3 | 521661.8 | 514843   |
| 394.3167 | 32.28383 | 32.23883 | 32.30833 | 10 | 5 | 5 | 177379.9 | 821206   | 903554.1 |
| 213.0405 | 11.07457 | 10.8821  | 11.09513 | 6  | 2 | 4 | 336979.2 | 1044353  | 1963066  |
| 376.8155 | 34.841   | 34.80733 | 34.952   | 10 | 5 | 5 | 1283225  | 3284962  | 1550028  |
| 288.2541 | 22.327   | 22.08617 | 22.51933 | 11 | 5 | 4 | 1489740  | 2345608  | 1722664  |
| 410.2353 | 9.6609   | 9.61695  | 9.7372   | 5  | 3 | 2 | 33974288 | 55810763 | 62281378 |
| 396.9459 | 29.64058 | 29.57833 | 29.6665  | 10 | 5 | 5 | 135649.9 | 730753.8 | 665954.7 |
| 335.2417 | 20.988   | 20.846   | 21.03617 | 11 | 5 | 5 | 2084760  | 10156679 | 9236335  |
| 597.4706 | 9.055217 | 8.9037   | 9.089017 | 5  | 4 | 1 | 648473.1 | 942419.8 | 799311.6 |
| 582.2498 | 28.56208 | 28.50517 | 28.67283 | 10 | 5 | 5 | 317681.8 | 1281947  | 1573103  |
| 412.9045 | 16.973   | 16.893   | 16.98333 | 5  | 1 | 4 | 100312.2 | 274287   | 553255.8 |
| 458.9108 | 16.95233 | 16.9075  | 16.98333 | 7  | 2 | 5 | 295840.3 | 961806.1 | 1993833  |
| 276.2176 | 21.769   | 21.69167 | 21.82167 | 7  | 3 | 4 | 73313.17 | 361961.7 | 249218.6 |
| 457.0983 | 30.79167 | 30.74683 | 30.82083 | 3  | 0 | 3 | 100730.7 | 494142.5 | 152710.2 |
| 493.2366 | 18.946   | 18.90983 | 18.96767 | 8  | 3 | 5 | 1188634  | 3422273  | 4657846  |
| 549.3157 | 32.1315  | 32.10017 | 32.19283 | 7  | 3 | 4 | 1498563  | 3260787  | 4210036  |
| 513.1667 | 17.97217 | 17.91433 | 17.99933 | 7  | 3 | 4 | 73019.66 | 156272.4 | 163705.4 |
| 324.2753 | 18.31425 | 18.27233 | 18.35017 | 8  | 4 | 4 | 229977.4 | 1106575  | 1416979  |
| 537.3748 | 34.29217 | 34.234   | 34.44067 | 7  | 4 | 3 | 82911.84 | 411221.7 | 316313   |
| 469.2564 | 18.13625 | 18.04133 | 18.14683 | 4  | 1 | 3 | 104988.2 | 279630.1 | 362113.2 |
| 314.3057 | 38.91133 | 38.87283 | 38.94433 | 4  | 3 | 1 | 53220.34 | 383468.6 | 343547.9 |
| 297.1857 | 14.02048 | 13.93198 | 14.11172 | 9  | 4 | 5 | 105308.6 | 398049.8 | 509266.9 |
| 461.1479 | 10.67897 | 10.64782 | 10.77118 | 5  | 2 | 3 | 521892.8 | 1248745  | 2073791  |
| 391.1013 | 22.753   | 22.71833 | 22.79233 | 7  | 2 | 5 | 161421   | 437129.1 | 544245.3 |
| 335.1123 | 19.34483 | 19.326   | 19.37867 | 7  | 3 | 4 | 116761.6 | 481389.2 | 551912.4 |
| 632.9821 | 26.6545  | 26.65017 | 26.67933 | 6  | 2 | 4 | 109573.5 | 264180.3 | 361883.7 |
| 676.4856 | 9.905517 | 9.858417 | 9.918383 | 5  | 2 | 3 | 209815   | 381476.5 | 496990.6 |
| 517.1373 | 21.51408 | 21.48933 | 21.52233 | 4  | 1 | 3 | 134911.8 | 226467.3 | 320173   |
| 523.8027 | 29.14083 | 29.111   | 29.22633 | 7  | 3 | 4 | 84485.27 | 294708.4 | 307477.9 |
| 578.3779 | 9.415217 | 9.387533 | 9.474117 | 5  | 2 | 3 | 1989298  | 2211082  | 2589778  |
| 465.6727 | 43.07333 | 43.01    | 43.101   | 8  | 4 | 4 | 59010.23 | 459461.3 | 89345.55 |
| 850.6022 | 34.07483 | 34.068   | 34.083   | 7  | 3 | 4 | 102931.3 | 392912.9 | 505198.1 |
| 151.0325 | 11.69103 | 11.6697  | 11.72923 | 3  | 0 | 3 | 130478.4 | 678613   | 778563   |
| 683.3678 | 41.1935  | 41.14883 | 41.25083 | 9  | 5 | 4 | 82591.2  | 380306.1 | 358917.3 |
| 166.0865 | 14.67755 | 14.62222 | 14.78443 | 10 | 5 | 5 | 625385   | 4454213  | 4631995  |
| 545.1538 | 10.65043 | 10.63273 | 10.69263 | 3  | 0 | 3 | 536001.8 | 1162811  | 1804380  |
| 450.1999 | 10.69086 | 10.63273 | 10.75237 | 6  | 2 | 4 | 3196782  | 5058633  | 9839523  |

|          |          |          |          |    |   |   |          |          |          |
|----------|----------|----------|----------|----|---|---|----------|----------|----------|
| 849.5992 | 34.07067 | 34.00583 | 34.08933 | 10 | 5 | 5 | 376021.9 | 1830397  | 2263638  |
| 476.174  | 19.83067 | 19.78817 | 19.939   | 7  | 2 | 5 | 206527.3 | 505349.4 | 809858.3 |
| 303.1967 | 10.68849 | 10.63273 | 10.75237 | 8  | 3 | 5 | 701741.1 | 2597481  | 3463035  |
| 352.0111 | 16.93967 | 16.87717 | 16.97683 | 8  | 3 | 5 | 108608.3 | 338335.6 | 634053.3 |
| 433.2058 | 15.04007 | 14.98237 | 15.1654  | 10 | 5 | 5 | 406346.3 | 1673146  | 2112382  |
| 521.3363 | 9.084708 | 8.92085  | 9.2572   | 6  | 4 | 1 | 775076.7 | 1371751  | 1278024  |
| 212.2967 | 9.537367 | 9.52075  | 9.545617 | 3  | 0 | 3 | 5898831  | 9152041  | 18896058 |
| 407.1056 | 17.25867 | 17.2395  | 17.28367 | 4  | 1 | 3 | 36239.32 | 91753.24 | 171857.8 |
| 603.3421 | 8.848567 | 8.641617 | 8.989483 | 3  | 3 | 0 | 95814.09 | 241480.7 | 258527.9 |
| 492.3033 | 9.210858 | 9.101033 | 9.280533 | 6  | 4 | 2 | 4195275  | 14635525 | 12154623 |
| 313.2855 | 26.07042 | 26.02683 | 26.09767 | 10 | 5 | 5 | 361338.9 | 1164718  | 1163217  |
| 723.5899 | 30.662   | 30.61667 | 30.71367 | 8  | 4 | 4 | 1851327  | 4210431  | 3100215  |
| 729.3667 | 20.64217 | 20.61367 | 20.71717 | 5  | 2 | 3 | 137059.2 | 342527   | 471043.5 |
| 286.2575 | 15.56165 | 15.55713 | 15.5829  | 4  | 1 | 3 | 41995.78 | 112042.9 | 136775.5 |
| 483.1447 | 19.57992 | 19.54383 | 19.65933 | 8  | 3 | 5 | 403311.7 | 1029679  | 1557718  |
| 347.2796 | 33.01367 | 32.9965  | 33.082   | 5  | 3 | 2 | 124020.9 | 324567.8 | 459756.3 |
| 511.9766 | 19.33717 | 19.28517 | 19.37867 | 7  | 2 | 5 | 303182.1 | 823809.5 | 1359672  |
| 280.5181 | 30.47117 | 30.34733 | 30.48583 | 5  | 2 | 3 | 233851.7 | 961542   | 1265316  |
| 335.2782 | 19.49483 | 19.48167 | 19.536   | 6  | 3 | 3 | 98419.92 | 211515.1 | 254245.7 |
| 652.5009 | 43.71275 | 43.69117 | 43.73267 | 6  | 2 | 4 | 57752.05 | 399496.5 | 135304.9 |
| 1034.801 | 30.96567 | 30.9325  | 31.13867 | 10 | 5 | 4 | 358414.9 | 1337883  | 274227.7 |
| 422.2364 | 29.6515  | 29.55367 | 29.681   | 7  | 3 | 4 | 235951.7 | 1099067  | 1012901  |
| 301.2166 | 33.02217 | 32.989   | 33.073   | 9  | 5 | 4 | 633566.8 | 3005423  | 3478014  |
| 413.2189 | 22.119   | 22.05267 | 22.14983 | 6  | 2 | 4 | 421040   | 1059436  | 1375846  |
| 313.9831 | 22.98917 | 22.97417 | 23.00417 | 7  | 2 | 5 | 295770.1 | 753559.6 | 1151697  |
| 421.3358 | 39.74258 | 39.66433 | 39.79133 | 10 | 5 | 5 | 119661.2 | 914156.5 | 418961   |
| 415.1745 | 23.19817 | 23.181   | 23.20917 | 3  | 0 | 3 | 13005713 | 29426399 | 31012432 |
| 339.9403 | 17.72183 | 17.61917 | 17.7365  | 5  | 2 | 3 | 46467.55 | 198034   | 207069.8 |
| 665.5006 | 41.40775 | 41.252   | 41.50483 | 6  | 2 | 3 | 114655.8 | 1266637  | 650834.4 |
| 354.2642 | 23.38158 | 23.2955  | 23.41283 | 6  | 4 | 2 | 455732.7 | 2252563  | 2849802  |
| 624.2665 | 22.1215  | 22.03667 | 22.14983 | 8  | 3 | 5 | 6406509  | 14459962 | 22234200 |
| 392.2701 | 29.07117 | 29.03567 | 29.08867 | 4  | 0 | 4 | 155046.7 | 615088.8 | 105014.4 |
| 490.1717 | 20.7015  | 20.61367 | 20.97767 | 7  | 2 | 3 | 847240   | 2562260  | 3556695  |
| 409.3363 | 36.51967 | 36.50117 | 36.55267 | 5  | 2 | 3 | 22708    | 65756.38 | 35229.47 |
| 244.6325 | 18.93883 | 18.92367 | 18.967   | 7  | 2 | 5 | 171744.1 | 511836.6 | 702907.8 |
| 373.2343 | 9.173633 | 9.0693   | 9.2529   | 8  | 5 | 3 | 18087742 | 54527293 | 44233805 |
| 556.2905 | 26.72533 | 26.70683 | 26.7255  | 3  | 0 | 3 | 103477.7 | 237156.9 | 134767.2 |
| 1006.769 | 27.637   | 27.48767 | 27.83517 | 11 | 5 | 5 | 349800   | 2623245  | 2598726  |
| 279.102  | 27.446   | 27.31367 | 27.50333 | 9  | 5 | 4 | 281108.3 | 1256037  | 1403568  |
| 348.2257 | 12.52748 | 12.50047 | 12.68145 | 4  | 1 | 3 | 83913.79 | 349019.5 | 339463.3 |
| 401.5765 | 29.63675 | 29.57833 | 29.68167 | 10 | 5 | 5 | 135714.3 | 715857.8 | 662416.7 |
| 510.437  | 43.29183 | 43.24817 | 43.3375  | 7  | 3 | 4 | 29991.84 | 160038.4 | 50616.61 |
| 650.2529 | 43.35233 | 43.32217 | 43.39683 | 4  | 1 | 3 | 12895.16 | 49676.67 | 5080.456 |
| 261.1812 | 22.80408 | 22.70033 | 22.85733 | 6  | 2 | 3 | 49779.52 | 130461.6 | 112557.2 |
| 779.3501 | 10.67863 | 10.66922 | 10.72217 | 4  | 1 | 3 | 818167.5 | 1710108  | 3059975  |
| 371.2464 | 10.43412 | 10.36523 | 10.45412 | 9  | 4 | 5 | 824302.3 | 2685563  | 2745406  |
| 361.0712 | 24.92217 | 24.846   | 24.95883 | 5  | 2 | 3 | 66200.56 | 315716.6 | 385955.6 |

|          |          |          |          |    |   |   |          |          |          |
|----------|----------|----------|----------|----|---|---|----------|----------|----------|
| 402.2073 | 18.09608 | 18.06983 | 18.1585  | 6  | 3 | 3 | 311272.4 | 395555.6 | 493713.5 |
| 221.0882 | 9.68585  | 9.657717 | 9.7372   | 8  | 4 | 4 | 7086041  | 5655365  | 9336426  |
| 516.913  | 29.12633 | 29.09717 | 29.22633 | 7  | 3 | 4 | 86942.56 | 298328.9 | 301425.3 |
| 659.4784 | 32.05875 | 32.04317 | 32.08817 | 10 | 5 | 5 | 797617.1 | 3683885  | 4330692  |
| 200.2445 | 9.515808 | 9.49235  | 9.537367 | 4  | 1 | 3 | 4787066  | 6412945  | 9918102  |
| 554.1763 | 42.74217 | 42.67917 | 42.7635  | 10 | 5 | 5 | 1138356  | 8449315  | 4036358  |
| 279.6474 | 29.11183 | 29.11083 | 29.149   | 5  | 3 | 2 | 75293.27 | 274418.3 | 293425.7 |
| 898.4657 | 41.21525 | 41.17833 | 41.25083 | 6  | 4 | 2 | 53455.94 | 226854.5 | 197846.6 |
| 499.1911 | 10.70707 | 10.63273 | 10.77118 | 5  | 1 | 4 | 185149.4 | 276826.2 | 486070.3 |
| 284.2588 | 35.356   | 35.26533 | 35.36733 | 5  | 3 | 2 | 53661.24 | 205005.1 | 205153.5 |
| 596.2505 | 27.48225 | 27.4605  | 27.54433 | 6  | 3 | 3 | 102972.4 | 543220.4 | 496501   |
| 377.2636 | 19.72808 | 19.71183 | 19.8175  | 8  | 4 | 4 | 133183.8 | 440820.1 | 572624.2 |
| 328.2488 | 30.10033 | 30.001   | 30.12383 | 6  | 2 | 4 | 65309.26 | 247591.6 | 244544.7 |
| 552.2661 | 15.89845 | 15.8809  | 15.9483  | 8  | 3 | 5 | 67229.24 | 276732.7 | 197617.3 |
| 426.0287 | 18.10625 | 18.0455  | 18.155   | 4  | 1 | 3 | 68476.71 | 281733.3 | 420210.7 |
| 702.5013 | 31.99908 | 31.982   | 32.03    | 10 | 5 | 5 | 1914875  | 9345439  | 10812530 |
| 411.0942 | 31.51092 | 31.47917 | 31.57267 | 4  | 4 | 0 | 113650.6 | 122970.3 | 68496.85 |
| 287.1114 | 14.67017 | 14.57787 | 14.79963 | 9  | 4 | 5 | 246780.5 | 1347730  | 1416151  |
| 645.979  | 25.24417 | 25.1385  | 25.33417 | 10 | 5 | 4 | 439280.6 | 2258459  | 2698469  |
| 417.312  | 24.53683 | 24.502   | 24.5795  | 6  | 2 | 4 | 77475.68 | 156189.5 | 284775   |
| 381.0536 | 14.68502 | 14.65523 | 14.71322 | 5  | 1 | 4 | 143422   | 485099.9 | 855594.2 |
| 521.2845 | 27.48667 | 27.475   | 27.53083 | 5  | 2 | 3 | 226823.1 | 739063.7 | 1034769  |
| 453.1842 | 24.34267 | 24.2465  | 24.35717 | 9  | 4 | 5 | 1330743  | 4655575  | 6521712  |
| 361.0715 | 27.14675 | 26.84917 | 27.20067 | 10 | 3 | 5 | 509320.9 | 2093680  | 3079740  |
| 511.4344 | 33.3325  | 33.30233 | 33.37067 | 7  | 3 | 4 | 208500.1 | 513135.4 | 431060   |
| 324.0357 | 12.72863 | 12.72005 | 12.7294  | 4  | 1 | 3 | 133533.9 | 330323.7 | 604547   |
| 660.4813 | 32.05867 | 32.04317 | 32.08817 | 7  | 3 | 4 | 156077.1 | 595463.2 | 726589.6 |
| 555.1674 | 22.1215  | 22.05267 | 22.14983 | 8  | 3 | 5 | 350941.3 | 1263582  | 1724393  |
| 461.2805 | 22.89483 | 22.82617 | 22.92417 | 8  | 3 | 5 | 273666.5 | 785295.7 | 957322   |
| 491.1751 | 20.65667 | 20.61367 | 20.74433 | 5  | 2 | 3 | 179030.8 | 706394.9 | 945060.6 |
| 334.2461 | 30.4435  | 30.433   | 30.47117 | 3  | 0 | 3 | 222983.4 | 1615186  | 743930.5 |
| 482.2655 | 7.091367 | 7.04415  | 7.112467 | 5  | 2 | 3 | 673698.9 | 668267.2 | 1273223  |
| 508.3765 | 33.06792 | 32.98233 | 33.23217 | 10 | 5 | 5 | 750555.8 | 4384451  | 4442857  |
| 549.8173 | 32.117   | 32.10017 | 32.19283 | 7  | 3 | 4 | 786118.2 | 1858891  | 2444453  |
| 367.2966 | 13.45343 | 13.41623 | 13.50592 | 6  | 3 | 3 | 44037.92 | 145466.4 | 175432.8 |
| 241.0718 | 15.87604 | 15.80118 | 16.16075 | 8  | 3 | 4 | 269695.1 | 1280396  | 1922802  |
| 408.9706 | 13.6964  | 13.41887 | 13.76545 | 7  | 2 | 4 | 499748.9 | 1556559  | 3366791  |
| 233.0474 | 21.69342 | 21.57183 | 21.7275  | 6  | 2 | 4 | 111434.7 | 572074   | 642743.6 |
| 388.3941 | 41.71667 | 41.68367 | 41.7745  | 9  | 5 | 4 | 41820.15 | 321046.1 | 75098.01 |
| 290.1894 | 8.722833 | 8.4609   | 8.822367 | 7  | 5 | 2 | 318242.3 | 892151.5 | 886546.7 |
| 842.9673 | 29.19917 | 29.16983 | 29.32917 | 5  | 2 | 3 | 153683.3 | 369717.9 | 534406.6 |
| 473.0197 | 22.9685  | 22.938   | 23.01033 | 5  | 3 | 2 | 146911.5 | 452893.4 | 607520.9 |
| 424.25   | 10.41965 | 10.36523 | 10.45412 | 9  | 4 | 5 | 56377488 | 1.84E+08 | 2.92E+08 |
| 532.3275 | 42.35    | 42.3245  | 42.37433 | 7  | 3 | 4 | 40572.42 | 201886.3 | 66488.59 |
| 695.5102 | 9.275633 | 9.17955  | 9.394733 | 6  | 3 | 3 | 4590543  | 7423606  | 7760772  |
| 483.328  | 28.56208 | 28.5135  | 28.67283 | 10 | 5 | 5 | 1037658  | 4790062  | 4369482  |
| 355.0101 | 16.93567 | 16.87717 | 16.96683 | 8  | 3 | 5 | 348285.1 | 1230534  | 2158794  |

|          |          |          |          |    |   |   |          |          |          |
|----------|----------|----------|----------|----|---|---|----------|----------|----------|
| 402.3414 | 21.41017 | 21.3425  | 21.50817 | 5  | 2 | 3 | 67623.02 | 213231.7 | 145260.6 |
| 571.4253 | 32.1895  | 32.16233 | 32.20567 | 9  | 4 | 5 | 693518.6 | 2840195  | 3371644  |
| 625.9307 | 43.42633 | 43.411   | 43.47067 | 5  | 3 | 2 | 40821.05 | 343517.8 | 143805.2 |
| 332.2227 | 26.65392 | 26.601   | 26.68133 | 10 | 5 | 5 | 568423.7 | 2078788  | 2372391  |
| 467.1636 | 15.64528 | 15.59763 | 15.6775  | 9  | 4 | 5 | 360372.7 | 1159389  | 1975058  |
| 624.2813 | 32.13142 | 32.10017 | 32.19283 | 6  | 3 | 3 | 230157   | 1064229  | 924781.7 |
| 299.2011 | 25.88817 | 25.83717 | 25.9325  | 9  | 5 | 4 | 1132526  | 3892547  | 5040141  |
| 433.8207 | 34.03158 | 33.99417 | 34.07483 | 6  | 3 | 3 | 133814.4 | 389687.4 | 528623.8 |
| 277.8107 | 30.474   | 30.34733 | 30.50117 | 5  | 3 | 2 | 240761.9 | 1009726  | 1310103  |
| 518.1402 | 23.181   | 23.13517 | 23.20917 | 5  | 2 | 3 | 75688.61 | 166713.8 | 235446.8 |
| 486.8077 | 9.186383 | 9.101033 | 9.266617 | 5  | 3 | 2 | 1743293  | 2073558  | 2197753  |
| 428.1111 | 22.4695  | 22.4575  | 22.55683 | 5  | 3 | 2 | 76242.81 | 224573.3 | 288398.3 |
| 541.4302 | 28.19167 | 28.13367 | 28.20567 | 7  | 3 | 4 | 249125.3 | 881525.5 | 1150323  |
| 240.0687 | 18.12375 | 18.04133 | 18.1595  | 10 | 5 | 5 | 16038013 | 77255750 | 1.06E+08 |
| 344.3164 | 34.38275 | 34.35283 | 34.45467 | 10 | 5 | 5 | 124232.4 | 757440.6 | 353001.6 |
| 626.4845 | 42.9675  | 42.939   | 43.05417 | 9  | 4 | 5 | 34623.45 | 173949.7 | 109109.3 |
| 537.1493 | 42.74733 | 42.67917 | 42.75883 | 8  | 5 | 3 | 50430.3  | 241204.7 | 169029.9 |
| 301.1045 | 22.1355  | 22.06867 | 22.15067 | 7  | 2 | 5 | 176287.9 | 598150.5 | 721572.4 |
| 336.1058 | 27.26383 | 27.186   | 27.28633 | 8  | 4 | 4 | 124244.9 | 580082.6 | 634615.7 |
| 573.3752 | 32.71533 | 32.6605  | 32.84617 | 10 | 5 | 5 | 1097258  | 4696818  | 5073479  |
| 464.0139 | 15.84518 | 15.80735 | 15.8805  | 4  | 1 | 3 | 95814.44 | 199239   | 268077.4 |
| 401.1093 | 29.637   | 29.57833 | 29.6815  | 9  | 4 | 5 | 79837.4  | 294295.8 | 289981.1 |
| 494.9576 | 16.95833 | 16.8785  | 16.98333 | 5  | 1 | 4 | 62633.72 | 155307.2 | 315418.8 |
| 775.5621 | 37.215   | 37.13367 | 37.27867 | 5  | 2 | 3 | 55183.06 | 245414   | 278716   |
| 547.8016 | 29.12633 | 29.09717 | 29.19683 | 5  | 2 | 3 | 71320.23 | 151401.7 | 215077.8 |
| 303.2324 | 23.83625 | 23.79267 | 23.87067 | 4  | 3 | 1 | 97391.63 | 429791.6 | 452098.7 |
| 468.3455 | 29.54667 | 29.52117 | 29.68067 | 7  | 5 | 2 | 53606    | 246807.9 | 117149.9 |
| 458.3675 | 22.56267 | 22.51233 | 22.61883 | 4  | 3 | 1 | 80588.15 | 447209.9 | 559967.3 |
| 312.2902 | 33.50017 | 33.481   | 33.54867 | 4  | 1 | 3 | 26146.06 | 90065.16 | 81277.13 |
| 546.8769 | 32.30083 | 32.2335  | 32.3515  | 5  | 2 | 3 | 78549.02 | 188447.5 | 141109.7 |
| 297.0732 | 22.92325 | 22.87467 | 22.96717 | 6  | 3 | 3 | 84783.67 | 351503.8 | 356403.1 |
| 387.0026 | 15.89552 | 15.81567 | 15.9394  | 5  | 1 | 4 | 162356.4 | 641436.5 | 1270373  |
| 238.9929 | 18.12058 | 18.1035  | 18.155   | 6  | 2 | 4 | 54082.73 | 245972.2 | 351229.4 |
| 310.9847 | 16.92833 | 16.89217 | 16.96683 | 8  | 3 | 5 | 329329.9 | 1162286  | 2076555  |
| 584.2216 | 27.52983 | 27.48667 | 27.53083 | 3  | 0 | 3 | 100437.1 | 139178.8 | 178260   |
| 496.8853 | 27.49267 | 27.4605  | 27.52983 | 5  | 3 | 2 | 26006.47 | 88555.78 | 98794.8  |
| 704.5168 | 28.79167 | 28.77283 | 28.809   | 10 | 5 | 5 | 1338453  | 6254892  | 7372696  |
| 434.0043 | 22.99525 | 22.928   | 23.01883 | 8  | 3 | 5 | 723075.4 | 2171846  | 3326126  |
| 527.2967 | 29.0205  | 29.01    | 29.0365  | 3  | 3 | 0 | 180627.4 | 587704.4 | 631129.5 |
| 593.4288 | 43.59433 | 43.57083 | 43.6235  | 10 | 5 | 5 | 389054   | 3977537  | 1293550  |
| 480.3456 | 28.3815  | 28.32717 | 28.50817 | 9  | 5 | 4 | 135768.2 | 806743.1 | 876027.9 |
| 289.274  | 37.8105  | 37.782   | 37.8885  | 7  | 3 | 4 | 510951.3 | 2759685  | 2881997  |
| 429.8031 | 29.75333 | 29.73817 | 29.7875  | 9  | 5 | 4 | 71266.85 | 460791   | 140097.4 |
| 278.1837 | 26.308   | 26.24733 | 26.369   | 9  | 4 | 5 | 214657.2 | 875509   | 647708.2 |
| 257.0715 | 18.1325  | 18.05717 | 18.19    | 9  | 5 | 4 | 373824.3 | 681200.7 | 919130.2 |
| 472.1081 | 34.70642 | 34.679   | 34.7435  | 4  | 1 | 3 | 43530.14 | 87211.52 | 169873.3 |
| 393.1406 | 19.70183 | 19.67333 | 19.7825  | 5  | 2 | 3 | 170016.7 | 485868.5 | 674656.5 |

|          |          |          |          |    |   |   |          |          |          |
|----------|----------|----------|----------|----|---|---|----------|----------|----------|
| 432.2466 | 10.43996 | 10.33325 | 10.4813  | 4  | 3 | 1 | 1495657  | 928505.7 | 797794.1 |
| 241.0499 | 22.97467 | 22.928   | 23.01883 | 10 | 5 | 5 | 4316619  | 22169480 | 27010770 |
| 428.0479 | 11.06757 | 10.7506  | 11.1144  | 6  | 2 | 3 | 1057541  | 2470103  | 5378829  |
| 437.2364 | 8.864275 | 8.641617 | 8.933833 | 6  | 3 | 3 | 1500736  | 6285084  | 6875588  |
| 350.1419 | 27.843   | 27.808   | 27.86817 | 6  | 2 | 4 | 67356.8  | 164696.6 | 225629.5 |
| 211.1121 | 25.00658 | 24.96417 | 25.04833 | 8  | 3 | 5 | 1788077  | 4081488  | 5618131  |
| 814.5543 | 36.78883 | 36.71217 | 36.8375  | 4  | 1 | 3 | 17892.11 | 45988.93 | 36739.33 |
| 533.1299 | 18.1435  | 18.089   | 18.16983 | 5  | 2 | 3 | 101398.9 | 350635   | 473380   |
| 394.2901 | 19.73783 | 19.70183 | 19.8     | 7  | 2 | 5 | 116533.3 | 377914.4 | 459265.4 |
| 321.9772 | 16.98033 | 16.95067 | 17.018   | 3  | 3 | 0 | 65456.35 | 163244.5 | 118563.3 |
| 356.2801 | 29.78242 | 29.755   | 29.80333 | 10 | 5 | 5 | 214405.5 | 1794406  | 428657.8 |
| 395.2209 | 43.59567 | 43.563   | 43.6335  | 10 | 5 | 5 | 2577247  | 20120012 | 19856148 |
| 454.4358 | 9.166275 | 9.048233 | 9.322017 | 6  | 3 | 3 | 15560891 | 5313836  | 5730799  |
| 377.3083 | 18.95317 | 18.90867 | 18.98233 | 7  | 3 | 4 | 49900.08 | 110599.4 | 107686.6 |
| 447.0715 | 30.763   | 30.50117 | 30.84633 | 5  | 1 | 3 | 61179.5  | 206780.1 | 174619.4 |
| 467.3234 | 9.188767 | 9.116917 | 9.294367 | 6  | 4 | 2 | 2846876  | 4996588  | 3096948  |
| 526.2918 | 7.224617 | 7.138117 | 7.244283 | 5  | 2 | 3 | 918001.9 | 811599   | 1394143  |
| 303.1258 | 28.01417 | 27.98517 | 28.02867 | 6  | 2 | 4 | 83897.32 | 235721.4 | 340006.1 |
| 310.2092 | 30.86767 | 30.7045  | 31.15383 | 9  | 5 | 4 | 105904.2 | 572379.1 | 330801   |
| 1110.628 | 10.67828 | 10.64867 | 10.77118 | 7  | 3 | 4 | 7714763  | 7590593  | 10354297 |
| 540.4268 | 28.19167 | 28.1485  | 28.20567 | 7  | 3 | 4 | 809426.9 | 3101497  | 4029011  |
| 417.0178 | 22.1145  | 22.06867 | 22.1735  | 10 | 5 | 5 | 186119.4 | 800133.1 | 882313.7 |
| 469.164  | 15.66027 | 15.59763 | 15.6926  | 9  | 4 | 5 | 174110.5 | 689166.2 | 987711.2 |
| 313.2698 | 23.495   | 23.3835  | 23.597   | 6  | 2 | 3 | 41792996 | 26797814 | 37147713 |
| 443.1048 | 35.17592 | 35.13233 | 35.21983 | 10 | 5 | 5 | 103630.6 | 455875.2 | 403967.5 |
| 703.5048 | 31.99892 | 31.9845  | 32.04183 | 10 | 5 | 5 | 714504.7 | 3086298  | 3642996  |
| 936.9746 | 18.10333 | 18.047   | 18.16983 | 3  | 0 | 3 | 57867.11 | 85473.85 | 127757.5 |
| 377.3171 | 34.8405  | 34.80733 | 35.1145  | 11 | 5 | 5 | 307491.9 | 650793.4 | 344611.1 |
| 461.8577 | 9.26545  | 9.09275  | 9.325783 | 6  | 4 | 2 | 2062797  | 1671274  | 1950143  |
| 334.2341 | 22.75442 | 22.71633 | 22.78383 | 10 | 5 | 5 | 283878.4 | 1216751  | 1388852  |
| 585.4407 | 35.20667 | 35.15933 | 35.23583 | 10 | 5 | 5 | 948929.8 | 4669882  | 5487967  |
| 587.3396 | 7.464433 | 7.425917 | 7.47935  | 4  | 1 | 3 | 1181405  | 903430.1 | 1937723  |
| 589.086  | 25.68433 | 25.64683 | 25.70383 | 4  | 1 | 3 | 81647.59 | 107086.6 | 232718.8 |
| 226.1999 | 15.64116 | 15.58673 | 15.72248 | 10 | 5 | 5 | 784108.3 | 5321401  | 5776516  |
| 619.207  | 18.11058 | 18.06983 | 18.155   | 6  | 2 | 4 | 288254.3 | 522119.9 | 833018   |
| 612.4691 | 40.693   | 40.64233 | 40.71517 | 4  | 1 | 3 | 22367.19 | 79860.81 | 71699.7  |
| 327.2648 | 12.55797 | 12.52555 | 12.58962 | 5  | 2 | 3 | 29501.97 | 92413.92 | 72026.94 |
| 973.4867 | 41.20783 | 41.178   | 41.23617 | 5  | 3 | 2 | 421014.3 | 745463.4 | 1276576  |
| 385.367  | 23.26733 | 23.17283 | 23.40183 | 7  | 3 | 3 | 666728.9 | 885834.9 | 634265.8 |
| 273.2213 | 23.37067 | 23.2955  | 23.3925  | 3  | 3 | 0 | 90558.34 | 292526.4 | 265412.2 |
| 569.013  | 18.13608 | 18.089   | 18.158   | 6  | 3 | 3 | 97345.69 | 368954.5 | 512242.9 |
| 615.452  | 32.1315  | 32.10233 | 32.4835  | 11 | 5 | 5 | 816202.5 | 3551706  | 4316008  |
| 652.4133 | 9.26865  | 9.1639   | 9.302183 | 8  | 4 | 4 | 5338044  | 5777221  | 4756763  |
| 269.086  | 27.8825  | 27.749   | 27.93117 | 8  | 4 | 4 | 130259.6 | 512958.5 | 505770.6 |
| 476.2569 | 9.44975  | 9.2433   | 9.537367 | 5  | 1 | 3 | 31505746 | 24440327 | 29090955 |
| 418.3319 | 28.58517 | 28.483   | 28.60983 | 5  | 3 | 2 | 180311.1 | 1011850  | 1067725  |
| 519.9015 | 32.10167 | 32.08783 | 32.17667 | 5  | 3 | 2 | 72942.23 | 299174.5 | 401097   |

|          |          |          |          |    |   |   |          |          |          |
|----------|----------|----------|----------|----|---|---|----------|----------|----------|
| 384.1838 | 15.85185 | 15.84463 | 15.90992 | 6  | 3 | 3 | 158279.8 | 512528.1 | 967611.8 |
| 284.2951 | 43.79917 | 43.76917 | 43.818   | 10 | 5 | 5 | 123814.5 | 1119502  | 347020.2 |
| 346.1762 | 10.84825 | 10.81753 | 10.86477 | 3  | 3 | 0 | 106009.7 | 166005.2 | 193284.1 |
| 460.0487 | 22.50833 | 22.441   | 22.52717 | 7  | 2 | 5 | 172095.1 | 487320.8 | 706295.3 |
| 274.1891 | 30.441   | 30.36167 | 30.51183 | 6  | 3 | 3 | 79395.49 | 352276.9 | 212258.3 |
| 509.38   | 33.05817 | 32.97683 | 33.21733 | 9  | 5 | 4 | 190143.6 | 999517.6 | 1027877  |
| 510.4009 | 20.64217 | 20.605   | 20.7355  | 9  | 4 | 5 | 182818   | 564543.4 | 585601   |
| 299.1624 | 29.64058 | 29.57833 | 29.68167 | 10 | 5 | 5 | 2051206  | 9647034  | 9386404  |
| 580.2972 | 30.8495  | 30.73283 | 31.088   | 14 | 5 | 5 | 1716941  | 8490878  | 8142113  |
| 476.1346 | 23.86883 | 23.80833 | 23.90083 | 6  | 3 | 3 | 76315.98 | 226105.5 | 305983.2 |
| 347.2679 | 9.7801   | 9.730617 | 9.834667 | 6  | 4 | 2 | 297283.9 | 590775.2 | 689036.7 |
| 238.0734 | 18.1315  | 18.0555  | 18.1595  | 10 | 5 | 5 | 889591   | 3708143  | 5472195  |
| 455.1134 | 17.67508 | 17.663   | 17.70717 | 8  | 3 | 5 | 291892.1 | 899207   | 1328249  |
| 336.2256 | 24.84417 | 24.80033 | 24.853   | 5  | 0 | 5 | 211360.5 | 848043.7 | 281980   |
| 548.4685 | 28.1905  | 28.17683 | 28.235   | 5  | 2 | 3 | 91612.8  | 98344.75 | 117381.5 |
| 443.2392 | 33.463   | 33.43817 | 33.50883 | 3  | 0 | 3 | 51296.1  | 283433.5 | 213159.6 |
| 475.3256 | 9.199533 | 9.101033 | 9.266617 | 7  | 5 | 2 | 1.36E+09 | 6.2E+09  | 5.98E+09 |
| 934.4982 | 10.66553 | 10.58428 | 10.77118 | 7  | 3 | 4 | 12371830 | 14716843 | 31650383 |
| 432.2385 | 24.58358 | 24.53833 | 24.631   | 4  | 3 | 1 | 1581111  | 7155412  | 7291396  |
| 492.3522 | 6.723817 | 6.609117 | 6.754383 | 4  | 1 | 3 | 130371.6 | 276438.7 | 546594.5 |
| 282.1665 | 30.74758 | 30.48833 | 30.80633 | 4  | 1 | 3 | 59664.38 | 160245.3 | 187535.7 |
| 633.0396 | 22.12217 | 22.1215  | 22.1355  | 3  | 0 | 3 | 96227.87 | 193194.2 | 286997.6 |
| 629.3855 | 26.654   | 26.63517 | 26.67933 | 5  | 2 | 3 | 139348.3 | 319320.8 | 456603   |
| 320.1313 | 31.06625 | 31.017   | 31.11333 | 6  | 2 | 4 | 118094.7 | 261079.6 | 508939.9 |
| 497.2361 | 7.091367 | 6.947317 | 7.138183 | 5  | 2 | 3 | 321696.9 | 330893.4 | 511449.2 |
| 375.2172 | 9.311775 | 9.304633 | 9.48745  | 4  | 1 | 3 | 2829714  | 5762191  | 6411427  |
| 747.5311 | 31.94025 | 31.92633 | 31.9665  | 10 | 5 | 5 | 503445.7 | 2121911  | 2500067  |
| 356.9926 | 19.34483 | 19.28517 | 19.37867 | 5  | 2 | 3 | 87868.8  | 272906.1 | 398000.9 |
| 790.5547 | 20.30983 | 20.24633 | 20.47283 | 7  | 3 | 4 | 234038.8 | 658932.7 | 699858.1 |
| 507.4718 | 10.73577 | 10.63273 | 10.77118 | 5  | 1 | 4 | 157181.2 | 319122   | 676478.4 |
| 270.6125 | 10.68801 | 10.58428 | 10.75237 | 10 | 5 | 5 | 5721799  | 17336382 | 31372806 |
| 173.0963 | 11.38005 | 11.13642 | 11.56305 | 7  | 3 | 3 | 112566.8 | 348505.9 | 347724.8 |
| 540.0779 | 20.65617 | 20.61367 | 20.7265  | 7  | 2 | 5 | 1183898  | 3387939  | 4858406  |
| 715.4752 | 9.479858 | 9.3803   | 9.4881   | 4  | 3 | 1 | 6005557  | 8664446  | 8945257  |
| 225.1966 | 15.64753 | 15.6121  | 15.72248 | 10 | 5 | 5 | 5471225  | 44004711 | 44912138 |
| 629.9123 | 19.34483 | 19.31383 | 19.36417 | 5  | 2 | 3 | 77381.88 | 180501.8 | 327956.3 |
| 268.0828 | 27.8825  | 27.76383 | 27.94633 | 10 | 5 | 5 | 1309642  | 5446625  | 5990821  |
| 251.1282 | 14.95883 | 14.87973 | 15.07448 | 8  | 4 | 4 | 224434.2 | 1350819  | 1131966  |
| 432.3573 | 9.201983 | 9.101033 | 9.290367 | 4  | 3 | 1 | 1852071  | 2261525  | 2123502  |
| 166.0407 | 21.43333 | 21.42217 | 21.45483 | 4  | 1 | 3 | 30376.27 | 84536.21 | 83446.43 |
| 336.2749 | 33.7715  | 33.71167 | 33.78817 | 7  | 3 | 4 | 91943.38 | 402041.5 | 454671.3 |
| 451.2075 | 19.5725  | 19.561   | 19.64167 | 5  | 3 | 2 | 115560.4 | 292985.8 | 382985.9 |
| 719.4168 | 9.730617 | 9.6898   | 9.7482   | 3  | 0 | 3 | 316269   | 377976.4 | 590511   |
| 416.2157 | 19.75742 | 19.7335  | 19.8175  | 6  | 2 | 4 | 68631.69 | 149805.9 | 85482.55 |
| 295.2273 | 25.50067 | 25.47417 | 25.54083 | 5  | 2 | 3 | 295549.2 | 2136487  | 2778785  |
| 733.2353 | 21.07967 | 21.05233 | 21.106   | 5  | 2 | 3 | 238215.8 | 288627.6 | 456118.2 |
| 312.1264 | 21.05058 | 21.03767 | 21.106   | 6  | 2 | 4 | 141038.5 | 550917.1 | 730396.1 |



|          |          |          |          |    |   |   |          |          |          |
|----------|----------|----------|----------|----|---|---|----------|----------|----------|
| 451.8162 | 29.73867 | 29.71067 | 29.75333 | 6  | 3 | 3 | 74802.3  | 557482.6 | 186755.4 |
| 369.2197 | 32.06817 | 32.04317 | 32.146   | 4  | 0 | 4 | 61882.47 | 207133.4 | 78701.22 |
| 548.0724 | 20.628   | 20.61367 | 20.6525  | 3  | 3 | 0 | 73725.92 | 205654.7 | 231766.7 |
| 550.2598 | 30.95867 | 30.91283 | 31.07383 | 10 | 5 | 5 | 1124028  | 2555499  | 4668365  |
| 804.5695 | 34.21683 | 34.183   | 34.25717 | 10 | 5 | 5 | 2168182  | 10617816 | 12909857 |
| 354.2644 | 24.48167 | 24.41317 | 24.49083 | 5  | 3 | 2 | 611422.9 | 2376177  | 2830401  |
| 234.1129 | 16.16553 | 16.14437 | 16.1881  | 5  | 2 | 3 | 51896.55 | 266392.2 | 182185.6 |
| 878.6079 | 31.77767 | 31.74583 | 31.89733 | 10 | 4 | 5 | 84606.62 | 393345.8 | 436889.4 |
| 805.5729 | 34.22942 | 34.173   | 34.25717 | 10 | 5 | 5 | 908044.1 | 4254121  | 5227036  |
| 365.1659 | 9.53435  | 9.47815  | 9.5571   | 4  | 1 | 3 | 5470685  | 5932258  | 8555627  |
| 440.3587 | 28.76167 | 28.75417 | 28.78417 | 10 | 5 | 5 | 4268443  | 20090880 | 22501316 |
| 548.1302 | 17.54583 | 17.50183 | 17.60417 | 7  | 3 | 4 | 97919.8  | 244944.2 | 331319.9 |
| 445.3359 | 29.964   | 29.90533 | 29.98683 | 10 | 5 | 5 | 145597.8 | 1190001  | 313359.7 |
| 300.1657 | 29.6365  | 29.593   | 29.681   | 9  | 4 | 5 | 272803.7 | 871198.4 | 813822.1 |
| 293.1097 | 16.589   | 16.58317 | 16.60673 | 5  | 2 | 3 | 44874.69 | 176774.8 | 129837.3 |
| 341.2439 | 30.45567 | 30.36167 | 30.50017 | 4  | 1 | 3 | 55125.18 | 250677.8 | 64587.98 |
| 401.194  | 17.67975 | 17.6625  | 17.71    | 10 | 5 | 5 | 615042.9 | 2880154  | 2626416  |
| 487.3421 | 41.44733 | 41.4245  | 41.49817 | 8  | 3 | 5 | 47040.52 | 186054.2 | 126252.6 |
| 382.2058 | 23.791   | 23.66117 | 23.82633 | 7  | 3 | 4 | 196811.7 | 386231.4 | 607451.4 |
| 248.1689 | 16.93758 | 16.893   | 16.957   | 8  | 3 | 5 | 81707.45 | 424914.3 | 371326.7 |
| 557.1732 | 42.73675 | 42.6495  | 42.7635  | 10 | 5 | 5 | 76224.08 | 258546.5 | 226166.1 |
| 455.3324 | 33.94033 | 33.84033 | 33.95033 | 8  | 4 | 4 | 250734.8 | 944798.9 | 1255899  |
| 889.1457 | 30.29975 | 30.24433 | 30.39767 | 4  | 1 | 3 | 45270.52 | 62832.41 | 137247.5 |
| 243.0884 | 9.7455   | 9.696633 | 9.834667 | 7  | 4 | 3 | 932576   | 2727628  | 2744420  |
| 330.9903 | 16.92767 | 16.86417 | 16.96683 | 5  | 2 | 3 | 96271.84 | 203446.7 | 140915.7 |
| 315.1747 | 34.64883 | 34.5525  | 34.67233 | 8  | 4 | 4 | 459168.3 | 1481285  | 1784493  |
| 1035.804 | 30.93483 | 30.91917 | 31.03733 | 9  | 4 | 5 | 252818.9 | 820612.7 | 360119.3 |
| 791.558  | 31.8845  | 31.86833 | 31.921   | 9  | 4 | 5 | 257603.7 | 1140418  | 1313031  |
| 498.0491 | 13.73948 | 13.68192 | 13.83137 | 8  | 3 | 5 | 281082.7 | 845793   | 1717855  |
| 244.1912 | 15.14996 | 15.09967 | 15.25612 | 10 | 5 | 5 | 449462.7 | 3006572  | 2911370  |
| 705.5203 | 28.79167 | 28.77283 | 28.81017 | 10 | 5 | 5 | 522100.9 | 2030840  | 2446391  |
| 434.1354 | 14.53248 | 14.51855 | 14.55197 | 4  | 1 | 3 | 198343.6 | 866028.3 | 1633724  |
| 373.2204 | 11.89736 | 11.85592 | 11.9864  | 6  | 2 | 4 | 846874.1 | 2737070  | 3307109  |
| 415.3172 | 25.935   | 25.8955  | 25.976   | 10 | 5 | 5 | 893720   | 3220405  | 3674107  |
| 584.4374 | 35.20583 | 35.15933 | 35.23583 | 10 | 5 | 5 | 2955600  | 16811951 | 19205369 |
| 692.1799 | 27.53    | 27.44817 | 28.07317 | 10 | 2 | 4 | 90578.7  | 338190.1 | 453569.5 |
| 528.4111 | 28.80783 | 28.78783 | 28.82533 | 10 | 5 | 5 | 4736406  | 22890777 | 26115503 |
| 432.2051 | 10.68813 | 10.56983 | 10.77118 | 8  | 4 | 4 | 2094675  | 4046070  | 8203974  |
| 451.5492 | 9.193308 | 9.101033 | 9.280533 | 8  | 5 | 3 | 3842527  | 8449586  | 5429456  |
| 517.0614 | 20.94833 | 20.89033 | 20.99083 | 5  | 2 | 3 | 400713   | 2082863  | 2906208  |
| 555.2691 | 9.187083 | 9.116917 | 9.2529   | 7  | 5 | 2 | 3064920  | 5114554  | 5207725  |
| 550.7612 | 30.97967 | 30.9495  | 31.07383 | 6  | 2 | 4 | 550853.4 | 889437.8 | 1689858  |
| 361.3662 | 37.34408 | 37.32033 | 37.48783 | 10 | 5 | 5 | 134038   | 1358024  | 273460.2 |
| 320.2306 | 25.13117 | 25.12733 | 25.14167 | 3  | 0 | 3 | 1318426  | 2259379  | 2574601  |
| 512.395  | 31.89817 | 31.8845  | 31.94283 | 9  | 4 | 5 | 132211.5 | 581507.8 | 537033.3 |
| 412.2156 | 22.1215  | 22.05267 | 22.14983 | 8  | 3 | 5 | 2319062  | 6350403  | 9045921  |
| 315.1363 | 28.13117 | 28.04433 | 28.1765  | 8  | 4 | 4 | 162032.3 | 653466   | 724359.3 |

|          |          |          |          |    |   |   |          |          |          |
|----------|----------|----------|----------|----|---|---|----------|----------|----------|
| 776.4542 | 40.65942 | 40.6315  | 40.672   | 6  | 4 | 2 | 34657.23 | 175014.9 | 92814.55 |
| 484.3848 | 28.79292 | 28.77283 | 28.81533 | 10 | 5 | 5 | 4707948  | 23289637 | 26231993 |
| 407.2256 | 8.991775 | 8.92085  | 9.142017 | 4  | 3 | 1 | 499888.8 | 1442646  | 1940163  |
| 246.1493 | 9.187083 | 9.101033 | 9.266617 | 7  | 5 | 2 | 7157084  | 30840211 | 24238751 |
| 493.3067 | 17.58967 | 17.55117 | 17.619   | 9  | 4 | 5 | 226131.8 | 884075.5 | 1010648  |
| 627.4497 | 9.915283 | 9.88085  | 9.91985  | 3  | 0 | 3 | 757558.1 | 328065.5 | 415897.1 |
| 616.4641 | 28.81208 | 28.78783 | 28.82533 | 10 | 5 | 5 | 3157889  | 14997790 | 17451824 |
| 877.3828 | 32.13192 | 32.11483 | 32.151   | 4  | 1 | 3 | 219442.2 | 278107.8 | 600801.9 |
| 747.5326 | 34.34017 | 34.148   | 34.3985  | 7  | 3 | 4 | 44850.08 | 493758.7 | 140606.2 |
| 933.4961 | 10.67828 | 10.62815 | 10.77118 | 7  | 3 | 4 | 15163837 | 17636720 | 37166664 |
| 362.2981 | 31.13233 | 31.08133 | 31.172   | 10 | 5 | 5 | 4640603  | 14397061 | 14315235 |
| 423.2469 | 6.401875 | 6.223433 | 6.54365  | 4  | 3 | 1 | 14883742 | 12886422 | 20071104 |
| 585.4015 | 13.12235 | 13.09522 | 13.16097 | 4  | 4 | 0 | 40713.05 | 70108.9  | 87244.81 |
| 288.2537 | 23.93408 | 23.81117 | 23.9735  | 10 | 5 | 5 | 935473.8 | 1960355  | 1803713  |
| 538.0824 | 20.6415  | 20.61367 | 20.7015  | 5  | 1 | 4 | 130592.9 | 306796.9 | 445162.8 |
| 346.1471 | 33.9485  | 33.91533 | 33.9655  | 6  | 2 | 4 | 126211.1 | 290322.5 | 543998.5 |
| 340.3213 | 35.16183 | 35.147   | 35.21983 | 10 | 5 | 5 | 661451.9 | 2612492  | 1970492  |
| 320.2042 | 19.36708 | 19.33467 | 19.40017 | 6  | 2 | 4 | 55441.36 | 233636   | 49364.66 |
| 351.761  | 19.5215  | 19.46717 | 19.5535  | 6  | 1 | 5 | 98911.24 | 177268.5 | 241941.9 |
| 453.8483 | 9.82     | 9.155983 | 10.05278 | 14 | 4 | 5 | 16053604 | 24903443 | 35032084 |
| 483.3729 | 32.30608 | 32.26967 | 32.32533 | 8  | 3 | 5 | 148985.6 | 645250.3 | 761238.2 |
| 519.1327 | 23.18808 | 23.17283 | 23.1955  | 6  | 2 | 4 | 109554   | 355566.8 | 380255.2 |
| 307.2127 | 10.0083  | 9.9505   | 10.04445 | 8  | 4 | 4 | 1706156  | 2741589  | 3985551  |
| 634.9975 | 20.65617 | 20.64217 | 20.7015  | 3  | 0 | 3 | 272965.2 | 945698.2 | 1333524  |
| 392.169  | 25.13117 | 24.87367 | 25.14167 | 3  | 0 | 3 | 88162.64 | 644930.2 | 259180.5 |
| 313.2166 | 30.25883 | 30.22083 | 30.2755  | 5  | 3 | 2 | 204851.2 | 871464.7 | 816160.4 |
| 227.2008 | 35.45583 | 35.42017 | 35.5025  | 5  | 1 | 4 | 328095.8 | 2251943  | 2206236  |
| 206.1667 | 31.62867 | 31.5415  | 31.69017 | 8  | 3 | 5 | 75230.95 | 306038.2 | 316935.5 |
| 516.1361 | 22.12217 | 22.1125  | 22.14983 | 5  | 2 | 3 | 165961.3 | 572441.5 | 795796.5 |
| 618.3495 | 27.36067 | 27.33933 | 27.43167 | 4  | 1 | 3 | 50094.09 | 264447.9 | 114268.3 |
| 972.9851 | 41.208   | 41.207   | 41.23617 | 5  | 3 | 2 | 649869.3 | 1328844  | 2235617  |
| 599.1151 | 21.03583 | 21.02167 | 21.07733 | 5  | 1 | 4 | 519096.3 | 2303501  | 3274690  |
| 478.1869 | 18.18142 | 18.113   | 18.189   | 4  | 3 | 1 | 70268.71 | 160312.5 | 178739.1 |
| 298.2747 | 15.99013 | 15.94805 | 16.039   | 9  | 4 | 5 | 164028.4 | 659010.7 | 749604.6 |
| 347.7796 | 9.531333 | 9.49235  | 9.5571   | 5  | 2 | 3 | 5024112  | 7815895  | 12503898 |
| 539.3667 | 29.5495  | 29.30117 | 29.6225  | 7  | 3 | 2 | 36973.81 | 207852.3 | 106342.6 |
| 294.1145 | 22.12217 | 22.05267 | 22.15067 | 7  | 3 | 4 | 211442.2 | 815978.1 | 1023489  |
| 746.5281 | 20.1785  | 20.16467 | 20.3445  | 4  | 1 | 3 | 234555   | 845453.4 | 896760   |
| 182.962  | 2.179775 | 2.108667 | 2.383717 | 8  | 5 | 3 | 115690.8 | 1270446  | 764029.5 |
| 380.295  | 32.342   | 32.322   | 32.36517 | 9  | 5 | 4 | 700452.6 | 2651489  | 3920581  |
| 495.3282 | 26.66483 | 26.63917 | 26.96717 | 8  | 4 | 3 | 725074.9 | 5244013  | 5432331  |
| 342.9772 | 18.11767 | 18.05983 | 18.155   | 5  | 1 | 4 | 114000.3 | 552205.3 | 812408.9 |
| 330.9566 | 13.4618  | 13.43072 | 13.46398 | 4  | 1 | 3 | 330096.9 | 706097.1 | 1428949  |
| 687.2711 | 30.26892 | 30.24533 | 30.32083 | 4  | 3 | 1 | 35442.21 | 121416.3 | 143010.4 |
| 315.9487 | 23.486   | 23.44383 | 23.53733 | 7  | 3 | 4 | 38380.54 | 165673.6 | 198357.3 |
| 437.1839 | 22.37383 | 22.29433 | 22.3935  | 6  | 2 | 4 | 220046.9 | 609517.6 | 831324.6 |
| 482.3247 | 27.59008 | 27.56233 | 27.6755  | 6  | 3 | 3 | 595142.7 | 3824261  | 3047254  |

|          |          |          |          |    |   |   |          |          |          |
|----------|----------|----------|----------|----|---|---|----------|----------|----------|
| 331.0998 | 26.74042 | 26.66117 | 26.7905  | 10 | 5 | 5 | 244975.9 | 914630.5 | 979116.5 |
| 797.4392 | 10.87198 | 10.81963 | 10.87918 | 4  | 1 | 3 | 343091.4 | 330653.6 | 672356.8 |
| 346.8969 | 9.515    | 9.474117 | 9.545617 | 5  | 2 | 3 | 2606252  | 4279425  | 5797419  |
| 429.1561 | 26.66483 | 26.63517 | 26.69383 | 5  | 2 | 3 | 40683.91 | 72606.82 | 75693.67 |
| 279.7327 | 18.11767 | 18.09117 | 18.158   | 5  | 2 | 3 | 44758.96 | 175420.6 | 269866.8 |
| 331.3291 | 9.455275 | 9.43065  | 9.537367 | 4  | 1 | 3 | 8850917  | 9255841  | 12507541 |
| 617.081  | 25.68617 | 25.64683 | 25.69883 | 5  | 1 | 4 | 262029.3 | 447174.6 | 992136.6 |
| 438.1971 | 23.1945  | 23.10367 | 23.22467 | 9  | 5 | 4 | 390076   | 1429276  | 1794226  |
| 433.2023 | 10.69325 | 10.64867 | 10.75237 | 7  | 3 | 4 | 714677.2 | 1449976  | 2650425  |
| 572.4375 | 28.81767 | 28.78783 | 28.82533 | 10 | 5 | 5 | 4093514  | 19836892 | 22852924 |
| 344.2629 | 31.30117 | 31.18767 | 31.34983 | 7  | 3 | 4 | 146012.5 | 410517.8 | 415715.1 |
| 268.2276 | 29.12417 | 29.064   | 29.16967 | 6  | 3 | 3 | 158295.1 | 686492.9 | 835741.5 |
| 549.3751 | 33.42433 | 33.34    | 33.55383 | 7  | 4 | 3 | 152546.8 | 706425.1 | 759167.2 |
| 735.4075 | 7.464433 | 7.40945  | 7.4933   | 4  | 1 | 3 | 1391667  | 1394406  | 2988379  |
| 470.2869 | 18.8525  | 18.57733 | 18.89383 | 7  | 3 | 4 | 85614.84 | 176687.3 | 86943.27 |
| 556.4141 | 28.8225  | 28.778   | 28.83717 | 7  | 3 | 4 | 106532.3 | 437783.2 | 512296.4 |
| 234.0717 | 23.17283 | 23.16617 | 23.22367 | 3  | 0 | 3 | 40865.48 | 70172    | 45368.55 |
| 313.3667 | 23.45817 | 23.40183 | 23.49167 | 5  | 2 | 3 | 237988.4 | 541903.8 | 709978.1 |
| 271.1694 | 23.53658 | 23.47267 | 23.56117 | 4  | 3 | 1 | 129715.7 | 965322.4 | 740827.2 |
| 245.175  | 27.63333 | 27.50083 | 27.68517 | 7  | 3 | 4 | 140704.9 | 501667.1 | 507751.9 |
| 374.2124 | 34.4775  | 34.39883 | 34.51567 | 6  | 2 | 4 | 141536   | 738542.9 | 481841.5 |
| 282.0987 | 18.13892 | 18.0555  | 18.1595  | 10 | 5 | 5 | 1490385  | 7146413  | 10082616 |
| 404.011  | 22.1365  | 22.02083 | 22.201   | 7  | 2 | 5 | 188370.7 | 632133   | 889425.5 |
| 393.9935 | 18.1395  | 18.07617 | 18.1725  | 9  | 5 | 4 | 438148   | 2802228  | 2917260  |
| 662.4967 | 28.80783 | 28.77283 | 28.823   | 8  | 3 | 5 | 132797.7 | 495607.7 | 622260.7 |
| 311.2701 | 18.50633 | 18.49033 | 18.51683 | 7  | 3 | 4 | 49724.26 | 101561.9 | 88884.3  |
| 197.0808 | 40.32533 | 40.26633 | 40.34167 | 5  | 2 | 3 | 67957.42 | 597418.7 | 151953.7 |
| 333.2261 | 26.66483 | 26.62017 | 26.68133 | 7  | 3 | 4 | 90587.25 | 325927.2 | 372330.9 |
| 576.0989 | 14.9039  | 14.86205 | 14.95307 | 3  | 0 | 3 | 42028.06 | 96766.66 | 210772.7 |
| 343.1994 | 8.821183 | 8.58785  | 8.919867 | 7  | 4 | 3 | 428505.8 | 1126138  | 1018075  |
| 300.2441 | 18.43258 | 18.38883 | 18.49033 | 8  | 3 | 5 | 113546.7 | 371720   | 353562.8 |
| 455.2951 | 23.78558 | 23.68533 | 23.812   | 10 | 5 | 5 | 1029820  | 2694950  | 4412313  |
| 497.3674 | 19.94108 | 19.91983 | 20.0745  | 8  | 3 | 5 | 130184.6 | 304238.6 | 336604.9 |
| 357.9691 | 11.07922 | 10.72217 | 11.12732 | 7  | 1 | 5 | 2036579  | 7022582  | 14729885 |
| 972.4841 | 41.19317 | 41.1925  | 41.23617 | 7  | 4 | 3 | 590854.8 | 1129241  | 1876514  |
| 597.4426 | 31.51625 | 31.50283 | 31.63033 | 6  | 2 | 4 | 216353   | 514974.9 | 701520   |
| 367.6003 | 9.47815  | 9.473767 | 9.537367 | 3  | 0 | 3 | 26325242 | 30852667 | 61652349 |
| 291.6473 | 29.21517 | 29.2     | 29.32917 | 9  | 5 | 4 | 185058.7 | 869078.1 | 825387.1 |
| 355.1944 | 28.1345  | 28.05933 | 28.17633 | 8  | 3 | 5 | 229825.2 | 866816.4 | 995239.3 |
| 443.4203 | 35.16842 | 35.131   | 35.235   | 8  | 4 | 4 | 71006.7  | 197941.3 | 145029   |
| 526.8514 | 32.117   | 32.07083 | 32.20817 | 5  | 3 | 2 | 61898.56 | 290462.5 | 391252.1 |
| 329.2115 | 32.69692 | 32.62083 | 32.74567 | 10 | 5 | 5 | 854857.4 | 4346118  | 5160066  |
| 406.8822 | 11.03735 | 10.83542 | 11.1144  | 3  | 0 | 3 | 74055.98 | 157992.1 | 330696.6 |
| 407.4    | 30.1495  | 30.07333 | 30.1695  | 7  | 3 | 4 | 67812.53 | 205679.9 | 252332   |
| 227.5977 | 10.3978  | 10.34782 | 10.41848 | 5  | 2 | 3 | 972873.9 | 1710208  | 2811676  |
| 272.6104 | 10.75027 | 10.599   | 10.75237 | 5  | 2 | 3 | 344431.8 | 743296.1 | 1200804  |
| 376.3428 | 28.34667 | 28.3045  | 28.38817 | 6  | 2 | 4 | 65799.2  | 237855.4 | 199592.3 |

|          |          |          |          |    |   |   |          |          |          |
|----------|----------|----------|----------|----|---|---|----------|----------|----------|
| 285.1855 | 24.01533 | 23.93533 | 24.06217 | 7  | 3 | 4 | 373546.7 | 1967608  | 2202265  |
| 486.1142 | 27.909   | 27.85217 | 27.94167 | 7  | 3 | 4 | 75442.29 | 296622.9 | 340348   |
| 217.0527 | 18.13892 | 18.0555  | 18.1595  | 10 | 5 | 5 | 1268051  | 6259161  | 8400773  |
| 529.4145 | 28.80783 | 28.78783 | 28.823   | 10 | 5 | 5 | 1280947  | 6003953  | 7056318  |
| 402.1974 | 17.66317 | 17.64233 | 17.71217 | 9  | 4 | 5 | 94128.6  | 361661.1 | 291503.6 |
| 541.0809 | 20.65642 | 20.628   | 20.71383 | 6  | 2 | 4 | 247922.1 | 698719.6 | 1032123  |
| 385.0115 | 21.67933 | 21.66517 | 21.7275  | 5  | 2 | 3 | 69279.96 | 181332   | 254958.4 |
| 633.0725 | 9.5169   | 9.506667 | 9.537367 | 3  | 0 | 3 | 2622263  | 4632169  | 9981714  |
| 401.3097 | 29.90525 | 29.86    | 29.91383 | 8  | 4 | 4 | 128005.8 | 504817   | 214887.1 |
| 353.3417 | 42.8835  | 42.7805  | 42.92583 | 10 | 5 | 5 | 191461.1 | 2476627  | 933678.4 |
| 383.1567 | 23.28875 | 23.25383 | 23.353   | 10 | 5 | 5 | 202023.3 | 917989.3 | 1008803  |
| 913.2275 | 22.1215  | 22.03667 | 22.1365  | 5  | 1 | 4 | 189776.3 | 361436.3 | 629609.8 |
| 581.4325 | 29.11083 | 29.07917 | 29.1375  | 8  | 4 | 4 | 98671.77 | 356061.2 | 359571.1 |
| 199.1694 | 33.46117 | 33.40883 | 33.5045  | 9  | 4 | 5 | 2463178  | 16221096 | 14000402 |
| 561.0185 | 18.13292 | 18.089   | 18.1585  | 8  | 3 | 5 | 771259.1 | 2681826  | 4325468  |
| 562.0209 | 18.13233 | 18.07617 | 18.155   | 4  | 1 | 3 | 132930.9 | 483348.9 | 764246.6 |
| 584.1231 | 33.306   | 33.2885  | 33.32083 | 4  | 1 | 3 | 59513.73 | 130040.5 | 253244.8 |
| 348.3112 | 23.59425 | 23.50217 | 23.63333 | 10 | 5 | 5 | 395985.7 | 1065222  | 1367630  |
| 469.314  | 39.16367 | 39.07683 | 39.22517 | 9  | 4 | 5 | 65883.3  | 399978.1 | 204792.3 |
| 307.7146 | 10.02687 | 9.957467 | 10.0476  | 9  | 4 | 4 | 518448.3 | 742830.1 | 1153657  |
| 481.8741 | 27.96158 | 27.883   | 28.06933 | 8  | 4 | 4 | 112632.8 | 417245.4 | 435767.7 |
| 200.4708 | 9.522017 | 9.500283 | 9.545617 | 4  | 1 | 3 | 3832861  | 4945269  | 7698347  |
| 273.2063 | 32.49733 | 32.37967 | 32.53617 | 10 | 5 | 5 | 13022801 | 73947279 | 74703609 |
| 508.3467 | 23.44217 | 23.38433 | 23.46133 | 7  | 4 | 3 | 94124.98 | 456561.7 | 371208.9 |
| 561.0547 | 22.136   | 22.05267 | 22.14983 | 7  | 2 | 5 | 251016.8 | 559854.3 | 985078.6 |
| 584.2081 | 30.53608 | 30.48633 | 30.59083 | 6  | 2 | 4 | 64772.88 | 184079.2 | 259692.8 |
| 335.0582 | 23.91067 | 23.80967 | 23.9295  | 3  | 0 | 3 | 35185.54 | 78002.72 | 101329.3 |
| 231.1595 | 22.04908 | 21.92583 | 22.2915  | 10 | 4 | 5 | 307535.1 | 1824739  | 1393204  |
| 409.3077 | 10.56941 | 10.48317 | 10.63528 | 8  | 5 | 3 | 481507   | 1017906  | 908967   |
| 288.2254 | 33.47033 | 33.40633 | 33.5045  | 10 | 5 | 5 | 233273.6 | 1202705  | 1211557  |
| 307.5386 | 23.03933 | 22.97417 | 23.074   | 8  | 3 | 5 | 69378.01 | 286396.9 | 343960.2 |
| 660.4905 | 28.80467 | 28.78783 | 28.823   | 10 | 5 | 5 | 2241289  | 10193235 | 12117907 |
| 341.1374 | 13.03677 | 12.97682 | 13.10903 | 7  | 2 | 5 | 237842   | 486677.5 | 657630.3 |
| 309.1265 | 24.66167 | 24.63833 | 24.683   | 3  | 0 | 3 | 329428.8 | 1616540  | 2501991  |
| 547.3495 | 29.2135  | 29.18433 | 29.29983 | 9  | 4 | 5 | 196148.4 | 1078133  | 905836.9 |
| 347.2311 | 11.65072 | 11.62662 | 11.66192 | 6  | 3 | 3 | 941772.4 | 2108456  | 3301566  |
| 679.513  | 16.32723 | 16.1361  | 16.42825 | 4  | 0 | 3 | 9385317  | 17470513 | 13002469 |
| 497.3437 | 30.01767 | 30.00117 | 30.1315  | 9  | 5 | 4 | 2823494  | 19348119 | 10624139 |
| 176.0086 | 19.35233 | 19.29933 | 19.37867 | 7  | 2 | 5 | 560860.3 | 2115656  | 2886141  |
| 508.4673 | 29.7105  | 29.68667 | 29.75267 | 5  | 2 | 3 | 43839.1  | 114848.1 | 97569.96 |
| 351.2723 | 36.99117 | 36.94733 | 37.00533 | 3  | 0 | 3 | 47541.24 | 213239.7 | 64133.02 |
| 471.3071 | 14.36816 | 14.34647 | 14.40448 | 6  | 1 | 5 | 135320.3 | 516761.5 | 709582.7 |
| 483.2035 | 29.64433 | 29.593   | 29.66617 | 8  | 5 | 3 | 124559.1 | 384836   | 341629.3 |
| 553.2272 | 18.39892 | 18.35717 | 18.42267 | 10 | 5 | 5 | 535889.1 | 2557835  | 2786189  |
| 874.5754 | 31.51383 | 31.47067 | 31.532   | 3  | 0 | 3 | 42113.04 | 176737   | 121232.3 |
| 480.0407 | 19.90767 | 19.889   | 19.93883 | 5  | 1 | 4 | 171005.6 | 353453.1 | 783837.3 |
| 402.1187 | 23.50767 | 23.4585  | 23.54633 | 7  | 3 | 4 | 98586.77 | 349676.1 | 434830.6 |

|          |          |          |          |    |   |   |          |          |          |
|----------|----------|----------|----------|----|---|---|----------|----------|----------|
| 727.3604 | 10.87912 | 10.80383 | 10.93685 | 9  | 4 | 5 | 1373583  | 1844037  | 3673861  |
| 481.2621 | 7.096917 | 6.9714   | 7.112467 | 5  | 2 | 3 | 3739611  | 4424177  | 8013585  |
| 445.0975 | 21.69433 | 21.67867 | 21.711   | 5  | 2 | 3 | 110609   | 457221.6 | 253315.7 |
| 452.2495 | 43.61733 | 43.57467 | 43.64533 | 3  | 0 | 3 | 179623.5 | 3753978  | 736282.7 |
| 494.24   | 18.93883 | 18.89467 | 18.967   | 7  | 2 | 5 | 221925   | 679768.7 | 923209   |
| 413.055  | 19.341   | 19.29933 | 19.37867 | 6  | 2 | 4 | 233535   | 704244.9 | 980038.8 |
| 784.6297 | 9.529058 | 9.502483 | 9.6125   | 4  | 1 | 3 | 3743059  | 5764372  | 12454000 |
| 200.0372 | 21.711   | 21.52767 | 21.74217 | 5  | 1 | 4 | 86491.41 | 255673   | 300288.3 |
| 241.1777 | 21.70392 | 21.5865  | 21.74217 | 8  | 3 | 5 | 361724.5 | 599996.5 | 530461.1 |
| 474.6576 | 32.11583 | 32.05783 | 32.17667 | 4  | 1 | 3 | 109726.7 | 172506.1 | 382130   |
| 359.1673 | 29.2135  | 29.19917 | 29.32917 | 5  | 1 | 4 | 110665.1 | 192747.1 | 149205.6 |
| 401.2573 | 29.637   | 29.57833 | 29.69667 | 9  | 4 | 5 | 1440955  | 3995502  | 4142792  |
| 452.3347 | 44.45967 | 44.39033 | 44.52517 | 4  | 1 | 3 | 38541.69 | 271764.3 | 84178.28 |
| 454.1875 | 24.34283 | 24.2525  | 24.35717 | 7  | 2 | 5 | 323468.8 | 946446.8 | 1304541  |
| 934.4386 | 29.1255  | 29.08083 | 29.149   | 5  | 3 | 2 | 61687.39 | 125013.3 | 140857.7 |
| 1109.624 | 10.67828 | 10.599   | 10.70088 | 7  | 4 | 3 | 11483904 | 11442614 | 16649248 |
| 726.9305 | 9.957467 | 9.90985  | 9.988417 | 5  | 2 | 3 | 307507.8 | 227870.3 | 327704   |
| 574.4439 | 28.82083 | 28.79333 | 28.82533 | 7  | 3 | 4 | 177009.6 | 678254   | 804242.9 |
| 200.1729 | 21.13833 | 21.05833 | 21.15517 | 5  | 2 | 3 | 97215.13 | 420122.2 | 235843.8 |
| 334.109  | 19.35375 | 19.32383 | 19.37867 | 10 | 5 | 5 | 1099891  | 4510156  | 5332612  |
| 558.0882 | 20.9775  | 20.687   | 21.01983 | 7  | 2 | 4 | 1907916  | 12280824 | 16678466 |
| 353.2629 | 21.63983 | 21.52767 | 21.70933 | 5  | 2 | 3 | 46755.63 | 57877.66 | 74253.88 |
| 432.3038 | 18.90108 | 18.84967 | 18.96767 | 6  | 2 | 4 | 66851.94 | 134737.4 | 93427.79 |
| 309.2039 | 33.47767 | 33.39433 | 33.511   | 9  | 4 | 5 | 614542.6 | 2518393  | 3243804  |
| 248.3592 | 28.235   | 28.20833 | 28.2495  | 5  | 2 | 3 | 21722.16 | 89292.09 | 107579.9 |
| 293.1967 | 10.49603 | 10.4685  | 10.58333 | 5  | 3 | 2 | 642078.8 | 1659631  | 2393869  |
| 406.1319 | 21.02133 | 20.96633 | 21.0525  | 9  | 4 | 5 | 657685.9 | 2149615  | 3182274  |
| 478.3298 | 30.97175 | 30.922   | 31.03733 | 4  | 3 | 1 | 231306.8 | 907593.2 | 468948.7 |
| 431.0334 | 25.6755  | 25.63383 | 25.70383 | 7  | 2 | 5 | 69705.76 | 288941.7 | 296604.1 |
| 350.2331 | 14.0132  | 13.96163 | 14.11172 | 7  | 4 | 3 | 366985   | 2300629  | 2190998  |
| 701.4481 | 9.50125  | 9.412217 | 9.596683 | 6  | 2 | 4 | 52564908 | 65038034 | 1.04E+08 |
| 330.2432 | 30.26133 | 30.24367 | 30.29067 | 7  | 3 | 4 | 104473   | 538502.9 | 477951.9 |
| 781.1995 | 29.17717 | 29.14083 | 29.2115  | 3  | 0 | 3 | 43379.55 | 101318   | 99300.2  |
| 387.5475 | 23.28183 | 23.25383 | 23.353   | 10 | 5 | 5 | 194972.1 | 903465.9 | 992229.4 |
| 464.1464 | 10.69782 | 10.59015 | 10.77118 | 9  | 4 | 5 | 2453186  | 6724736  | 12275996 |
| 644.462  | 10.86473 | 10.81455 | 10.89825 | 5  | 2 | 3 | 276340.9 | 410192.6 | 502149   |
| 552.2238 | 18.39542 | 18.35717 | 18.41967 | 10 | 5 | 5 | 1989274  | 9459350  | 10244978 |
| 354.3011 | 35.25267 | 35.23467 | 35.42017 | 9  | 5 | 4 | 120966.6 | 354517.8 | 187999.6 |
| 750.5496 | 28.7925  | 28.7755  | 28.795   | 5  | 2 | 3 | 57345.26 | 192640.5 | 236208.5 |
| 758.5639 | 25.80633 | 25.79083 | 25.8335  | 4  | 3 | 1 | 105009   | 301997.1 | 392294.2 |
| 498.8038 | 9.236842 | 9.15355  | 9.325783 | 6  | 4 | 2 | 2053501  | 2055858  | 2206785  |
| 440.2241 | 10.41848 | 10.335   | 10.45412 | 7  | 3 | 4 | 863380.7 | 2460374  | 2748305  |
| 423.2941 | 10.38529 | 10.30387 | 10.47928 | 4  | 1 | 3 | 8252499  | 9653479  | 16124249 |
| 266.2205 | 8.9587   | 8.800333 | 8.99255  | 3  | 3 | 0 | 109808.7 | 84810.99 | 92087.31 |
| 308.2225 | 28.14683 | 28.05933 | 28.20033 | 9  | 5 | 4 | 232683.1 | 1074860  | 1183305  |
| 734.3614 | 26.44767 | 26.39933 | 26.509   | 7  | 3 | 4 | 71969.05 | 256696.5 | 260742.4 |
| 326.1054 | 15.22385 | 15.20227 | 15.2466  | 4  | 1 | 3 | 86774.1  | 276117.1 | 453082.6 |

|          |          |          |          |    |   |   |          |          |          |
|----------|----------|----------|----------|----|---|---|----------|----------|----------|
| 492.103  | 18.10883 | 18.09117 | 18.1585  | 7  | 3 | 4 | 359120.9 | 1093700  | 1565744  |
| 328.2639 | 34.0535  | 34.03117 | 34.06033 | 5  | 2 | 3 | 46380.32 | 170526.2 | 236685   |
| 447.1702 | 10.65827 | 10.63728 | 10.75237 | 6  | 4 | 2 | 548877.8 | 1178797  | 1145187  |
| 628.5111 | 29.54667 | 29.47633 | 29.60783 | 5  | 2 | 3 | 41074.65 | 145781.4 | 183968.6 |
| 388.1504 | 33.4195  | 33.40633 | 33.50417 | 5  | 1 | 4 | 73173.63 | 340171.6 | 239510.4 |
| 320.2956 | 21.1995  | 21.119   | 21.23533 | 7  | 3 | 4 | 60616.28 | 192187.7 | 210811   |
| 933.9974 | 10.66738 | 10.62815 | 10.77118 | 6  | 2 | 4 | 16857752 | 21007714 | 44455434 |
| 434.8583 | 23.16975 | 23.09983 | 23.20917 | 10 | 5 | 5 | 61550.08 | 250662.8 | 235160.4 |
| 457.0224 | 13.73958 | 13.71057 | 13.76793 | 4  | 1 | 3 | 70669.9  | 193278.1 | 358475.3 |
| 370.1506 | 42.45883 | 42.3625  | 42.52617 | 9  | 5 | 4 | 115827.5 | 750808.7 | 654828   |
| 484.1482 | 19.58708 | 19.57683 | 19.6     | 4  | 1 | 3 | 76219.46 | 135782.5 | 208026.3 |
| 435.0205 | 18.13117 | 18.047   | 18.1595  | 8  | 5 | 3 | 145002.3 | 822487.6 | 914543.2 |
| 308.2952 | 31.64442 | 31.59733 | 31.7145  | 6  | 3 | 3 | 495728.4 | 2533229  | 3067072  |
| 370.2163 | 9.52075  | 9.48745  | 9.5558   | 5  | 1 | 4 | 4252813  | 11924388 | 13025376 |
| 393.1325 | 16.68233 | 16.64683 | 16.72017 | 8  | 3 | 5 | 144382.1 | 790702.4 | 991616.1 |
| 666.248  | 29.21083 | 29.19917 | 29.31467 | 8  | 3 | 5 | 154091.8 | 818218.1 | 879677.7 |
| 442.329  | 10.61707 | 10.52882 | 10.64958 | 8  | 4 | 4 | 1044053  | 2132416  | 2676488  |
| 201.2045 | 26.18083 | 26.14117 | 26.19367 | 7  | 3 | 4 | 97403.16 | 277848.9 | 332513.2 |
| 333.1365 | 24.92608 | 24.90433 | 24.944   | 4  | 1 | 3 | 50156.09 | 132312.3 | 122056.5 |
| 233.8527 | 9.52075  | 9.444983 | 9.537367 | 3  | 0 | 3 | 2619291  | 1866939  | 3968855  |
| 241.0525 | 21.77133 | 21.76967 | 21.779   | 3  | 0 | 3 | 101464.9 | 364531.6 | 239834.2 |
| 642.4662 | 16.54502 | 16.50318 | 16.58867 | 8  | 3 | 5 | 182553.4 | 660809.5 | 599933.3 |
| 240.196  | 23.36492 | 23.31033 | 23.3995  | 6  | 4 | 2 | 66343.7  | 282226.9 | 238579.1 |
| 362.2778 | 28.3815  | 28.34517 | 28.46717 | 5  | 3 | 2 | 73811.88 | 242924.2 | 262792.7 |
| 336.2537 | 30.33342 | 30.29383 | 30.34    | 4  | 3 | 1 | 83330.82 | 300743.5 | 325312.7 |
| 571.8673 | 16.97433 | 16.87017 | 16.99883 | 4  | 1 | 3 | 72582.34 | 124626.5 | 262158.2 |
| 241.1519 | 18.12083 | 18.09117 | 18.155   | 6  | 2 | 4 | 54498.67 | 273501.8 | 253810.2 |
| 171.1381 | 17.678   | 17.66633 | 17.70317 | 5  | 3 | 2 | 125596.5 | 1333372  | 355653.7 |
| 661.4939 | 28.8075  | 28.77283 | 28.823   | 9  | 4 | 5 | 719414   | 3181430  | 3758518  |
| 270.0786 | 27.88    | 27.7785  | 27.96167 | 7  | 3 | 4 | 81407.4  | 280844.3 | 324168.1 |
| 796.5437 | 29.79733 | 29.76983 | 29.812   | 10 | 5 | 5 | 1054211  | 10878340 | 2290861  |
| 350.2904 | 34.4805  | 34.39883 | 34.50133 | 7  | 3 | 4 | 95226.26 | 404054.5 | 400536.8 |
| 354.2397 | 9.192183 | 9.101033 | 9.266617 | 7  | 5 | 2 | 2501318  | 5078255  | 3639390  |
| 346.0743 | 14.96628 | 14.95053 | 14.97883 | 6  | 1 | 5 | 137250.2 | 471521   | 840155.6 |
| 338.2036 | 17.22258 | 17.2045  | 17.26767 | 6  | 2 | 4 | 135427   | 337114.4 | 338461.7 |
| 240.0151 | 17.73342 | 17.60433 | 17.789   | 10 | 5 | 5 | 387755   | 2655159  | 2781638  |
| 570.9316 | 17.98717 | 17.91433 | 18.03433 | 7  | 3 | 4 | 279451.7 | 1089551  | 1610340  |
| 485.3881 | 28.79175 | 28.77283 | 28.8075  | 10 | 5 | 5 | 1294944  | 5590128  | 6498244  |
| 473.3277 | 29.696   | 29.63633 | 29.72533 | 10 | 5 | 5 | 115689.5 | 943245.1 | 247506.4 |
| 322.2859 | 17.531   | 17.48717 | 17.564   | 7  | 3 | 4 | 284115   | 1082262  | 1263920  |
| 332.2227 | 21.14992 | 21.0945  | 21.192   | 6  | 3 | 3 | 63745.97 | 340986.8 | 205116.8 |
| 254.1356 | 9.193308 | 9.101033 | 9.2529   | 8  | 5 | 3 | 2.02E+08 | 4.05E+08 | 6.27E+08 |
| 163.0755 | 27.27067 | 27.20017 | 27.31367 | 7  | 3 | 4 | 403728.1 | 3036366  | 2478234  |
| 396.3324 | 28.69658 | 28.67617 | 28.70417 | 10 | 5 | 5 | 3883046  | 19867798 | 22061644 |
| 622.2803 | 30.26683 | 30.23033 | 30.36167 | 5  | 2 | 3 | 102141.5 | 416116.6 | 362635.1 |
| 606.4639 | 22.666   | 22.65217 | 22.70433 | 5  | 2 | 3 | 206336.3 | 738264.6 | 830843   |
| 294.1706 | 15.04007 | 15.00692 | 15.1654  | 8  | 4 | 4 | 101716.7 | 379596   | 435710.1 |

|          |          |          |          |    |   |   |          |          |          |
|----------|----------|----------|----------|----|---|---|----------|----------|----------|
| 468.3892 | 31.94283 | 31.907   | 31.95667 | 3  | 3 | 0 | 112978.5 | 890698.5 | 568692.2 |
| 357.1365 | 17.72133 | 17.67367 | 17.7365  | 8  | 3 | 5 | 290132.6 | 814198.5 | 1162761  |
| 618.2478 | 30.96917 | 30.93717 | 31.07383 | 10 | 5 | 5 | 186520.2 | 1138280  | 823690.7 |
| 502.1124 | 22.1365  | 22.11583 | 22.17967 | 5  | 2 | 3 | 140382.6 | 327723   | 516232.9 |
| 573.441  | 28.81758 | 28.78417 | 28.82533 | 10 | 5 | 5 | 1293687  | 5585804  | 6622646  |
| 224.0735 | 21.149   | 21.1235  | 21.18467 | 3  | 0 | 3 | 35563.67 | 108890.6 | 111332.9 |
| 469.2362 | 25.94208 | 25.9055  | 25.976   | 6  | 2 | 4 | 82063.2  | 234788.8 | 307884.3 |
| 438.3792 | 35.59092 | 35.55833 | 35.60933 | 6  | 3 | 3 | 387508.4 | 4586045  | 5229334  |
| 523.1607 | 10.69158 | 10.57912 | 10.7931  | 6  | 0 | 5 | 288230   | 616435.8 | 835052.6 |
| 601.0439 | 17.67025 | 17.6485  | 17.71217 | 4  | 1 | 3 | 50112.18 | 96467.33 | 154652.5 |
| 172.1333 | 33.8725  | 33.84717 | 33.88167 | 5  | 2 | 3 | 171679.7 | 561766.7 | 752556.7 |
| 437.1938 | 23.17692 | 23.10367 | 23.22467 | 10 | 5 | 5 | 1984845  | 6756551  | 8214812  |
| 396.2191 | 7.408425 | 7.352633 | 7.421633 | 4  | 1 | 3 | 378389.3 | 346125.9 | 692476.1 |
| 753.893  | 10.68129 | 10.63273 | 10.77118 | 6  | 1 | 5 | 4292802  | 5962522  | 11833104 |
| 337.3582 | 35.20567 | 35.15933 | 35.22067 | 6  | 3 | 3 | 26367.41 | 87264.64 | 85773.71 |
| 345.1365 | 31.97867 | 31.95533 | 31.98583 | 4  | 1 | 3 | 46609.28 | 112733.9 | 135534.8 |
| 256.8506 | 8.577575 | 8.545983 | 8.668683 | 4  | 3 | 1 | 471204.9 | 949896.5 | 230106.1 |
| 269.248  | 29.69633 | 29.60783 | 29.75717 | 10 | 5 | 5 | 3025370  | 20226198 | 19808625 |
| 343.1545 | 29.345   | 29.24733 | 29.39583 | 7  | 4 | 3 | 1770584  | 12002671 | 11299387 |
| 332.3315 | 32.77925 | 32.741   | 32.82017 | 10 | 5 | 5 | 5568119  | 38544987 | 20668405 |
| 256.2637 | 36.60042 | 36.57717 | 36.64933 | 8  | 3 | 5 | 507620.8 | 2101912  | 2182895  |
| 511.4844 | 36.26933 | 36.21617 | 36.37617 | 8  | 4 | 4 | 25131.68 | 123069   | 107268.9 |
| 385.2928 | 34.792   | 34.7655  | 34.81033 | 6  | 2 | 4 | 155816.4 | 299246   | 323749.2 |
| 343.133  | 13.03291 | 12.99103 | 13.07942 | 4  | 1 | 3 | 82509.49 | 153721.7 | 212676.7 |
| 224.119  | 17.58967 | 17.5815  | 17.6205  | 6  | 2 | 4 | 289935.5 | 949074.8 | 1194930  |
| 556.1731 | 42.74217 | 42.67917 | 42.7635  | 10 | 5 | 5 | 273631.6 | 1731182  | 985329.6 |
| 687.5103 | 21.41975 | 21.32883 | 21.43217 | 6  | 3 | 3 | 91075.78 | 182414.7 | 216399.2 |
| 258.0793 | 18.11625 | 18.06167 | 18.1585  | 8  | 3 | 5 | 522790.6 | 2579975  | 3382197  |
| 253.0877 | 22.11875 | 22.05267 | 22.14983 | 8  | 3 | 5 | 197476.9 | 915521.8 | 1002924  |
| 793.2705 | 28.98917 | 28.979   | 29.00517 | 7  | 3 | 4 | 62305.33 | 192334.8 | 231035.5 |
| 433.3295 | 36.51617 | 36.48817 | 36.54983 | 5  | 3 | 2 | 85780.91 | 189148.6 | 81356.21 |
| 522.229  | 26.242   | 26.18667 | 26.30383 | 5  | 2 | 3 | 64489.28 | 109299   | 148271.3 |
| 270.3159 | 26.1955  | 26.1375  | 26.24233 | 9  | 5 | 4 | 561401.2 | 1272370  | 2410573  |
| 535.072  | 20.64917 | 20.628   | 20.67267 | 4  | 1 | 3 | 443749.3 | 1478664  | 2178067  |
| 549.0585 | 29.228   | 29.18517 | 29.32917 | 7  | 3 | 4 | 48909.04 | 213008.5 | 222597.4 |
| 550.0813 | 30.84933 | 30.80267 | 30.9455  | 5  | 3 | 2 | 29221.45 | 89576.64 | 114892.9 |
| 352.3063 | 28.61208 | 28.59217 | 28.61483 | 10 | 5 | 5 | 2236161  | 11587269 | 12781230 |
| 367.2749 | 12.15684 | 12.12773 | 12.28258 | 8  | 3 | 5 | 63761.03 | 213925.5 | 273432   |
| 659.4781 | 19.89117 | 19.86017 | 19.89467 | 3  | 3 | 0 | 48934.67 | 121270.2 | 155865.4 |
| 551.7615 | 31.01917 | 30.93633 | 31.07967 | 4  | 1 | 3 | 152550.6 | 181186.4 | 356556.8 |
| 332.096  | 9.515    | 9.444983 | 9.537367 | 5  | 2 | 3 | 2798573  | 5497404  | 7273997  |
| 214.0377 | 11.06623 | 11.00837 | 11.25197 | 7  | 2 | 4 | 206781.5 | 683137.8 | 1126258  |
| 492.2798 | 44.06858 | 43.88017 | 44.13467 | 4  | 3 | 0 | 73051.48 | 579203.1 | 217299   |
| 330.5803 | 32.77958 | 32.76067 | 32.82017 | 6  | 3 | 3 | 20085.7  | 93375.15 | 77471.9  |
| 167.0899 | 14.66947 | 14.6373  | 14.71452 | 6  | 2 | 4 | 42462.71 | 285160.1 | 166256.5 |
| 381.3119 | 18.59642 | 18.55183 | 18.6225  | 6  | 2 | 4 | 118366.2 | 356249.9 | 364677.9 |
| 586.4435 | 35.20575 | 35.14433 | 35.2955  | 8  | 4 | 4 | 137785   | 619818.4 | 747326.9 |

|          |          |          |          |    |   |   |          |          |          |
|----------|----------|----------|----------|----|---|---|----------|----------|----------|
| 659.4722 | 23.17983 | 23.16267 | 23.19433 | 5  | 2 | 3 | 93791.48 | 139596.3 | 187952   |
| 395.2922 | 10.72091 | 10.66322 | 10.78962 | 8  | 3 | 5 | 407515.6 | 1042803  | 1352689  |
| 226.1919 | 9.217975 | 9.08515  | 9.266617 | 6  | 4 | 2 | 7467735  | 16900591 | 12391970 |
| 398.2195 | 43.60167 | 43.55983 | 43.64817 | 8  | 3 | 5 | 183777   | 1606232  | 707146.8 |
| 519.1326 | 21.5225  | 21.50817 | 21.53517 | 3  | 0 | 3 | 65307.13 | 91941.1  | 47690.83 |
| 572.4287 | 32.17592 | 32.1585  | 32.21817 | 6  | 2 | 4 | 106916   | 465701.4 | 325082.9 |
| 326.1966 | 23.08233 | 23.03067 | 23.12483 | 10 | 5 | 5 | 783976.4 | 3255399  | 3583160  |
| 912.2889 | 28.27817 | 28.23083 | 28.29333 | 5  | 2 | 3 | 56276.48 | 187676   | 237270.7 |
| 564.4291 | 29.13292 | 29.111   | 29.22633 | 10 | 5 | 5 | 142323.6 | 491499.2 | 495412   |
| 806.5766 | 34.22525 | 34.2125  | 34.25717 | 8  | 3 | 5 | 215281.5 | 924674.6 | 1174068  |
| 364.2698 | 29.34508 | 29.2755  | 29.3745  | 6  | 2 | 4 | 63757.49 | 236385.4 | 240173.4 |
| 313.2373 | 28.42533 | 28.14683 | 28.439   | 9  | 4 | 4 | 789217.1 | 3248425  | 4497361  |
| 415.2892 | 21.689   | 21.57183 | 21.72217 | 4  | 1 | 3 | 35637.2  | 94927.06 | 71024.56 |
| 475.8494 | 33.17867 | 33.13983 | 33.2515  | 7  | 3 | 4 | 52898.3  | 184101.4 | 203828.2 |
| 466.3749 | 20.46908 | 20.44917 | 20.59983 | 8  | 3 | 5 | 148457.6 | 450055.5 | 480112.7 |
| 357.9913 | 22.1365  | 22.1215  | 22.14983 | 3  | 0 | 3 | 74673.97 | 179178.5 | 263159.4 |
| 330.1741 | 16.36868 | 16.34268 | 16.37577 | 6  | 3 | 3 | 86410.5  | 282613.4 | 301009.1 |
| 323.2988 | 31.6215  | 31.58383 | 31.67417 | 5  | 2 | 3 | 47224.89 | 164245.6 | 112619.4 |
| 432.2026 | 17.27333 | 17.2395  | 17.327   | 10 | 5 | 5 | 2913778  | 13620131 | 14636502 |
| 380.2955 | 25.801   | 25.72083 | 25.80717 | 9  | 4 | 5 | 499004.3 | 1562861  | 1895599  |
| 669.2748 | 30.26    | 30.23533 | 30.36167 | 8  | 5 | 3 | 85923.72 | 309770.7 | 341195.2 |
| 310.1104 | 23.25383 | 23.24017 | 23.26717 | 5  | 1 | 4 | 111739   | 195349.6 | 309416.3 |
| 457.1706 | 9.199533 | 9.101033 | 9.266617 | 7  | 5 | 2 | 3711263  | 8297133  | 5462508  |
| 639.4532 | 9.463983 | 9.43065  | 9.537367 | 5  | 2 | 3 | 19004494 | 17396997 | 34025964 |
| 368.0076 | 27.88842 | 27.76383 | 27.89667 | 4  | 1 | 3 | 36984.86 | 68724.11 | 97108.85 |
| 333.1406 | 9.503675 | 9.444983 | 9.537367 | 4  | 1 | 3 | 29234076 | 24760499 | 49697150 |
| 416.3207 | 25.935   | 25.89767 | 25.9615  | 8  | 4 | 4 | 196353.5 | 514298.8 | 586040.5 |
| 398.1152 | 22.97417 | 22.938   | 23.01033 | 7  | 4 | 3 | 275332.8 | 671013.6 | 892869.2 |
| 344.2954 | 26.7405  | 26.669   | 26.79067 | 8  | 4 | 4 | 225972.1 | 1114506  | 1303285  |
| 1050.231 | 9.526183 | 9.460417 | 9.64025  | 6  | 3 | 2 | 5457578  | 3889528  | 3311892  |
| 792.5607 | 31.8835  | 31.8555  | 31.91233 | 5  | 2 | 3 | 63312.77 | 216072.8 | 268985.2 |
| 385.1102 | 15.68943 | 15.65882 | 15.71387 | 5  | 1 | 4 | 98228.48 | 266948.9 | 436530.1 |
| 436.3379 | 9.21175  | 9.101033 | 9.280533 | 8  | 5 | 2 | 37248004 | 92474698 | 66563251 |
| 283.9968 | 9.206367 | 9.101033 | 9.254883 | 4  | 3 | 1 | 1256422  | 4188864  | 1824365  |
| 934.9993 | 10.66513 | 10.61352 | 10.77118 | 8  | 3 | 5 | 6226709  | 7723626  | 16040816 |
| 703.5024 | 9.500283 | 9.463983 | 9.584433 | 9  | 5 | 4 | 1.89E+08 | 4.55E+08 | 6.22E+08 |
| 235.0633 | 18.12058 | 18.07617 | 18.1585  | 8  | 3 | 5 | 294319.8 | 1277450  | 1650578  |
| 482.3246 | 28.56208 | 28.51733 | 28.67283 | 10 | 5 | 5 | 3978530  | 21334760 | 17996739 |
| 271.2061 | 20.96275 | 20.89867 | 21.03417 | 10 | 5 | 5 | 573225.8 | 2727534  | 2910439  |
| 686.5067 | 21.41392 | 21.32883 | 21.4795  | 8  | 4 | 4 | 286093.4 | 642658.9 | 727582   |
| 253.138  | 9.199533 | 9.15355  | 9.2529   | 7  | 4 | 3 | 12546882 | 22716819 | 36412438 |
| 274.0955 | 22.12617 | 22.05267 | 22.15067 | 8  | 3 | 5 | 166374.3 | 635062.2 | 829357.2 |
| 299.1063 | 18.07167 | 18.0555  | 18.11817 | 5  | 2 | 3 | 201932.7 | 1344289  | 800815.6 |
| 503.0894 | 32.43083 | 32.40367 | 32.5285  | 5  | 1 | 4 | 67132.23 | 204452.4 | 361703.3 |
| 460.8476 | 44.47225 | 44.43883 | 44.52517 | 10 | 5 | 5 | 231867.2 | 3021082  | 708233.4 |
| 616.4546 | 32.144   | 32.0875  | 32.16033 | 5  | 2 | 3 | 139606.9 | 486496.8 | 644932.4 |
| 455.4296 | 37.44717 | 37.38533 | 37.50067 | 5  | 3 | 2 | 30517.43 | 77018.54 | 53684.12 |



|          |          |          |          |    |   |   |          |          |          |
|----------|----------|----------|----------|----|---|---|----------|----------|----------|
| 570.3472 | 29.13992 | 29.11167 | 29.22633 | 10 | 5 | 5 | 2360107  | 8200768  | 8130116  |
| 323.8627 | 8.862433 | 8.695117 | 8.906683 | 5  | 4 | 1 | 242310.8 | 306033.6 | 312529.6 |
| 234.0853 | 15.683   | 15.62787 | 15.68943 | 6  | 2 | 4 | 130008   | 404568.5 | 394992.2 |
| 302.2196 | 33.06283 | 33.04317 | 33.0685  | 3  | 3 | 0 | 102387.1 | 538655.3 | 436724.9 |
| 283.1495 | 30.27817 | 30.228   | 30.336   | 5  | 2 | 3 | 80716.47 | 287119.2 | 280878.8 |
| 255.1045 | 32.13283 | 32.07333 | 32.14983 | 6  | 1 | 5 | 166203.2 | 535591.2 | 685288.3 |
| 692.4683 | 29.8685  | 29.83217 | 29.887   | 5  | 3 | 2 | 25567.36 | 88744.42 | 17685.4  |
| 236.0565 | 27.888   | 27.76383 | 27.93117 | 10 | 5 | 5 | 642592.8 | 2842109  | 3226158  |
| 486.391  | 28.80608 | 28.79    | 28.81017 | 6  | 3 | 3 | 135463.3 | 459587.7 | 564707.9 |
| 704.5076 | 32.00233 | 31.98567 | 32.04183 | 8  | 3 | 5 | 147571.8 | 553965.3 | 644455.5 |
| 412.0518 | 19.34483 | 19.29933 | 19.364   | 9  | 4 | 5 | 1653607  | 6160722  | 8524031  |
| 384.348  | 25.782   | 25.70633 | 25.8205  | 10 | 5 | 5 | 479061.8 | 1290258  | 1550044  |
| 427.154  | 9.190992 | 9.0532   | 9.257833 | 8  | 5 | 3 | 9054193  | 9880376  | 15024464 |
| 475.3476 | 33.2055  | 33.13417 | 33.2765  | 9  | 5 | 4 | 134151.5 | 396143.9 | 405225.9 |
| 477.7399 | 9.209542 | 9.101033 | 9.2529   | 6  | 4 | 2 | 2042857  | 9639008  | 10226621 |
| 480.3091 | 31.97667 | 31.937   | 32.05783 | 8  | 5 | 3 | 305358.3 | 1438772  | 1752493  |
| 233.1536 | 35.23483 | 35.09967 | 35.25017 | 5  | 2 | 3 | 86759.76 | 439035.5 | 429675.7 |
| 311.1272 | 25.67167 | 25.6535  | 25.7215  | 9  | 4 | 5 | 1161651  | 3348614  | 4813575  |
| 610.7617 | 29.18375 | 29.15517 | 29.2705  | 6  | 2 | 4 | 301795.1 | 537829.1 | 935759.9 |
| 593.217  | 10.40805 | 10.34782 | 10.46653 | 7  | 3 | 4 | 1811284  | 3136308  | 6195094  |
| 417.6785 | 23.181   | 23.11833 | 23.20917 | 9  | 4 | 5 | 43690.7  | 178729.7 | 186612.4 |
| 707.537  | 9.463983 | 9.444983 | 9.64025  | 5  | 1 | 3 | 87666480 | 1.08E+08 | 2.03E+08 |
| 410.1476 | 23.8245  | 23.74567 | 23.98833 | 7  | 3 | 4 | 85913.79 | 262080.6 | 319209.1 |
| 433.704  | 10.70767 | 10.61352 | 10.7363  | 7  | 2 | 5 | 346792.5 | 550509.3 | 963062   |
| 226.1803 | 31.124   | 31.09517 | 31.21283 | 7  | 3 | 3 | 42331.44 | 150709.4 | 133008.5 |
| 380.1527 | 15.51133 | 15.48555 | 15.56615 | 6  | 2 | 4 | 134780.4 | 546503.7 | 246794.4 |
| 678.203  | 27.48583 | 27.44817 | 27.74617 | 5  | 3 | 1 | 51473.16 | 151664.1 | 191767.4 |
| 294.068  | 18.1415  | 18.08433 | 18.14433 | 4  | 3 | 1 | 66607.18 | 246330.1 | 107345.8 |
| 265.2571 | 28.20608 | 28.17683 | 28.232   | 10 | 5 | 5 | 700685.3 | 3180958  | 3715379  |
| 712.0117 | 9.4622   | 9.401867 | 9.537367 | 4  | 1 | 3 | 3304031  | 3578176  | 3840198  |
| 525.1379 | 32.117   | 32.087   | 32.19283 | 9  | 5 | 4 | 96285.8  | 493836.5 | 563107.3 |
| 486.3543 | 9.791017 | 9.730617 | 9.8518   | 7  | 3 | 4 | 592611.4 | 1338248  | 1449030  |
| 340.3213 | 31.14183 | 31.09583 | 31.1955  | 7  | 3 | 4 | 111404.7 | 238480.3 | 211388.6 |
| 518.3744 | 44.04017 | 44.004   | 44.08933 | 7  | 3 | 4 | 70768.02 | 462148.4 | 95376.96 |
| 589.0497 | 22.136   | 22.05267 | 22.14983 | 7  | 2 | 5 | 726946.6 | 2409625  | 3880203  |
| 729.4752 | 9.547767 | 9.416233 | 9.5558   | 5  | 1 | 4 | 3323371  | 3388661  | 5853831  |
| 311.0943 | 17.13083 | 17.105   | 17.18383 | 4  | 1 | 3 | 91701.73 | 299731.3 | 278197.9 |
| 232.163  | 21.99908 | 21.92583 | 22.0495  | 4  | 1 | 3 | 35756.79 | 90494.12 | 26814.82 |
| 401.2876 | 28.70325 | 28.69817 | 28.71783 | 8  | 3 | 5 | 324895.5 | 1271435  | 1350032  |
| 274.0509 | 21.67933 | 21.557   | 21.711   | 3  | 0 | 3 | 35313.84 | 103407.7 | 88682.62 |
| 182.0722 | 21.4365  | 21.35633 | 21.4785  | 7  | 2 | 5 | 106801.3 | 247459.3 | 316603.5 |
| 415.048  | 17.0165  | 16.965   | 17.08467 | 4  | 1 | 3 | 78240.15 | 147249.3 | 200258.8 |
| 964.4406 | 31.65633 | 31.58383 | 31.70567 | 8  | 3 | 5 | 132591.5 | 435765.8 | 550721   |
| 581.3002 | 30.89833 | 30.74683 | 31.05317 | 10 | 5 | 4 | 224878.3 | 1154874  | 910930.2 |
| 761.1814 | 29.2215  | 29.20017 | 29.27167 | 6  | 3 | 3 | 79080.67 | 223811.4 | 198710.8 |
| 314.1295 | 9.88495  | 9.88085  | 10.00593 | 3  | 0 | 3 | 57071.04 | 83293.29 | 98962.07 |
| 325.1399 | 23.76533 | 23.66983 | 23.812   | 11 | 5 | 5 | 403656.8 | 949798.4 | 1524549  |

|          |          |          |          |    |   |   |          |          |          |
|----------|----------|----------|----------|----|---|---|----------|----------|----------|
| 253.2645 | 25.03817 | 25.01267 | 25.07083 | 5  | 2 | 3 | 94299.91 | 264966.3 | 328325.2 |
| 196.5713 | 16.69025 | 16.63858 | 16.72233 | 6  | 2 | 4 | 90141.53 | 278326.2 | 375783.7 |
| 473.3076 | 20.40192 | 20.335   | 20.588   | 6  | 2 | 3 | 36081.35 | 74277.52 | 70345.77 |
| 245.1945 | 15.15585 | 15.12537 | 15.27123 | 7  | 3 | 4 | 54382.67 | 236975.7 | 240940.1 |
| 413.1635 | 25.481   | 25.3875  | 25.49183 | 5  | 1 | 4 | 84983.79 | 177859.9 | 104974.8 |
| 456.3538 | 22.90917 | 22.79633 | 22.93083 | 7  | 3 | 4 | 101352.6 | 247100.3 | 292623.8 |
| 383.2796 | 29.8975  | 29.86    | 29.93983 | 7  | 2 | 5 | 86447.49 | 832210.7 | 147472.8 |
| 383.1764 | 18.1215  | 18.06983 | 18.1595  | 10 | 5 | 5 | 1650765  | 2579971  | 3431942  |
| 507.3432 | 23.43567 | 23.38433 | 23.44817 | 8  | 4 | 4 | 364402.2 | 1618693  | 1735680  |
| 255.2108 | 37.01483 | 36.99117 | 37.08017 | 4  | 0 | 4 | 53696.39 | 655024.1 | 79920.6  |
| 981.4715 | 10.64958 | 10.6177  | 10.77118 | 5  | 1 | 4 | 431374.5 | 574608.7 | 1178763  |
| 775.4505 | 40.66017 | 40.62667 | 40.681   | 8  | 5 | 3 | 81947.77 | 583387.8 | 199393.1 |
| 252.913  | 22.136   | 22.1015  | 22.14983 | 5  | 2 | 3 | 67898.98 | 173760.1 | 245411.7 |
| 580.2729 | 32.12933 | 32.02967 | 32.17667 | 5  | 3 | 2 | 91163.71 | 379647.6 | 194199.2 |
| 271.0997 | 20.4375  | 20.411   | 20.56367 | 7  | 2 | 5 | 280716.8 | 936687.4 | 1093665  |
| 184.0735 | 28.48308 | 28.42183 | 28.568   | 6  | 3 | 3 | 234293.3 | 884092.2 | 912957   |
| 410.142  | 26.652   | 26.601   | 26.67933 | 8  | 3 | 5 | 331274.9 | 1162449  | 1555319  |
| 199.0732 | 29.65158 | 29.593   | 29.6815  | 10 | 5 | 5 | 357467.4 | 1504049  | 1493636  |
| 355.9727 | 11.06577 | 10.83542 | 11.1144  | 5  | 1 | 4 | 180083.7 | 545914.2 | 1104528  |
| 643.2594 | 29.21367 | 29.18517 | 29.2705  | 9  | 4 | 5 | 189375   | 860414.5 | 843852.6 |
| 509.3691 | 32.2465  | 32.22133 | 32.26167 | 7  | 3 | 4 | 234043.8 | 805623.4 | 931126.1 |
| 397.2932 | 32.37983 | 32.30083 | 32.408   | 7  | 3 | 4 | 389811   | 1500308  | 2004468  |
| 730.5334 | 21.48483 | 21.39833 | 21.551   | 5  | 3 | 2 | 195059.7 | 394462   | 474611   |
| 1187.57  | 10.70765 | 10.63617 | 10.77118 | 4  | 1 | 3 | 326192.5 | 227020.8 | 470634.4 |
| 509.2639 | 9.186383 | 9.08515  | 9.2529   | 7  | 5 | 2 | 2884157  | 6181143  | 7799926  |
| 370.1287 | 34.02142 | 33.97483 | 34.06833 | 8  | 3 | 5 | 82952.88 | 274853.5 | 442923.8 |
| 274.6257 | 27.46175 | 27.427   | 27.53083 | 8  | 3 | 5 | 1695671  | 9129966  | 12595863 |
| 369.2428 | 38.33    | 38.277   | 38.3635  | 7  | 4 | 3 | 130463.3 | 446809.7 | 372544.7 |
| 249.234  | 28.2065  | 28.1765  | 28.2495  | 7  | 3 | 4 | 45446.05 | 191348.9 | 189576.2 |
| 690.2481 | 29.14075 | 29.09717 | 29.19683 | 6  | 3 | 3 | 146038.3 | 429437.8 | 561620.1 |
| 402.2934 | 40.32683 | 40.25067 | 40.363   | 7  | 3 | 4 | 106010.2 | 580793.1 | 504763.3 |
| 599.0784 | 27.882   | 27.808   | 27.89517 | 5  | 2 | 3 | 477824   | 1595240  | 2166985  |
| 556.2966 | 44.76833 | 44.62467 | 44.975   | 6  | 1 | 3 | 72177.18 | 809491.8 | 180321.9 |
| 717.0065 | 25.67167 | 25.66133 | 25.689   | 5  | 1 | 4 | 118291.8 | 217850   | 482675.1 |
| 525.2884 | 7.224617 | 7.161867 | 7.244283 | 5  | 2 | 3 | 3913134  | 4634851  | 7921799  |
| 326.2773 | 33.12417 | 33.06983 | 33.15883 | 6  | 2 | 4 | 232495.5 | 1862256  | 2003270  |
| 488.2698 | 41.79517 | 41.6295  | 42.046   | 5  | 3 | 0 | 39550.68 | 536805   | 320835.4 |
| 377.2694 | 20.97917 | 20.91933 | 21.02167 | 7  | 3 | 4 | 99077.25 | 611770.1 | 646914   |
| 434.2121 | 33.20117 | 33.17183 | 33.2025  | 3  | 0 | 3 | 60834.06 | 298156.9 | 70400.98 |
| 502.4038 | 9.2647   | 9.1639   | 9.463983 | 6  | 4 | 1 | 2200867  | 2127716  | 2765188  |
| 724.5628 | 9.482133 | 9.444983 | 9.537367 | 4  | 1 | 3 | 47795164 | 39585245 | 70118686 |
| 362.1058 | 18.57433 | 18.55817 | 18.60767 | 6  | 2 | 4 | 72100.57 | 167046.9 | 257249.5 |
| 399.9976 | 22.6695  | 22.60467 | 22.6955  | 7  | 2 | 5 | 235484.3 | 793287.9 | 1164785  |
| 318.1089 | 20.43792 | 20.4255  | 20.55133 | 6  | 2 | 4 | 446293.7 | 1474793  | 1620374  |
| 167.9937 | 27.8825  | 27.76383 | 27.94633 | 10 | 5 | 5 | 1013597  | 4983540  | 5637135  |
| 723.4614 | 9.482133 | 9.444983 | 9.537367 | 4  | 1 | 3 | 41395744 | 35159202 | 62712185 |
| 163.1331 | 22.363   | 22.29433 | 22.37033 | 6  | 2 | 4 | 140420   | 883371.7 | 545895.6 |

|          |          |          |          |    |   |   |          |          |          |
|----------|----------|----------|----------|----|---|---|----------|----------|----------|
| 275.1606 | 19.713   | 19.666   | 19.74733 | 8  | 4 | 4 | 229651.3 | 745374.1 | 1022497  |
| 420.3478 | 27.07583 | 27.045   | 27.1     | 5  | 2 | 3 | 55989.73 | 268821   | 116989   |
| 327.2169 | 40.31183 | 40.25067 | 40.363   | 7  | 3 | 4 | 602773.1 | 3252763  | 3314150  |
| 457.1799 | 24.33042 | 24.2525  | 24.35967 | 6  | 2 | 4 | 87921.95 | 355576.8 | 342604   |
| 492.0773 | 33.95033 | 33.938   | 33.9655  | 5  | 1 | 4 | 93937.61 | 170885.5 | 380704.6 |
| 210.1606 | 10.41382 | 10.36523 | 10.45412 | 10 | 4 | 5 | 24150638 | 85949057 | 90985491 |
| 752.3902 | 43.573   | 43.55817 | 43.65367 | 5  | 1 | 4 | 62783.09 | 264132.1 | 117292.8 |
| 455.3329 | 27.11617 | 27.10417 | 27.20017 | 7  | 4 | 3 | 60484.16 | 272272.5 | 212747.7 |
| 274.2097 | 32.49733 | 32.37967 | 32.53617 | 10 | 5 | 5 | 2143186  | 11865403 | 12343271 |
| 253.1955 | 30.186   | 30.14533 | 30.23533 | 4  | 3 | 1 | 61114.38 | 338974   | 285625.4 |
| 363.997  | 16.94917 | 16.93417 | 16.98567 | 3  | 3 | 0 | 35735.86 | 217999   | 106338.2 |
| 617.4676 | 28.81308 | 28.78783 | 28.83117 | 10 | 5 | 5 | 985790.9 | 4465981  | 5308573  |
| 828.3601 | 10.66438 | 10.6177  | 10.78962 | 6  | 2 | 4 | 1031795  | 1898095  | 3483138  |
| 265.1002 | 21.13833 | 21.11167 | 21.16733 | 5  | 2 | 3 | 58626.76 | 103523.1 | 92409.33 |
| 322.9791 | 10.97298 | 10.81963 | 11.0085  | 3  | 0 | 3 | 96334.61 | 275637.4 | 490552   |
| 460.1972 | 34.27167 | 34.20383 | 34.29217 | 5  | 2 | 3 | 32895.73 | 129804.9 | 138578.1 |
| 226.5896 | 26.654   | 26.626   | 26.67933 | 5  | 2 | 3 | 45342.29 | 101897.4 | 137504   |
| 217.9903 | 10.07062 | 9.911233 | 10.0778  | 5  | 2 | 3 | 2181965  | 4755113  | 9661684  |
| 329.2326 | 31.57583 | 31.4565  | 31.644   | 7  | 3 | 4 | 239363.1 | 969553.9 | 734868.9 |
| 641.4626 | 16.54502 | 16.48962 | 16.58867 | 10 | 5 | 5 | 585800.4 | 2063122  | 1803940  |
| 200.173  | 20.43833 | 20.411   | 20.53867 | 5  | 2 | 3 | 78456.23 | 320526.4 | 160261.4 |
| 461.2879 | 28.76167 | 28.76083 | 28.76633 | 4  | 1 | 3 | 35623.48 | 115075   | 107248.3 |
| 274.053  | 19.3495  | 19.28517 | 19.364   | 5  | 2 | 3 | 62595.29 | 160263   | 252367   |
| 456.319  | 12.23491 | 12.17783 | 12.25648 | 4  | 1 | 3 | 240979.6 | 576090   | 268063.4 |
| 297.9785 | 30.415   | 30.36167 | 30.49533 | 4  | 1 | 3 | 97559.03 | 152758.2 | 314339.9 |
| 600.2681 | 29.21333 | 29.17833 | 29.29983 | 5  | 1 | 4 | 153858.1 | 611829.5 | 387357   |
| 585.2611 | 29.11875 | 29.066   | 29.16967 | 4  | 4 | 0 | 61539.94 | 121360.5 | 58365.23 |
| 568.4578 | 34.82767 | 34.80733 | 34.8435  | 4  | 3 | 1 | 35464.91 | 46442.37 | 30875.16 |
| 316.1943 | 23.02467 | 22.95767 | 23.048   | 6  | 3 | 3 | 131641   | 352592.4 | 499697.7 |
| 210.1497 | 9.215108 | 9.08515  | 9.432667 | 6  | 4 | 2 | 24741416 | 98949204 | 93996230 |
| 451.1687 | 26.64692 | 26.601   | 26.68133 | 8  | 3 | 5 | 891880.7 | 3278213  | 4300502  |
| 236.1731 | 27.26683 | 27.211   | 27.28717 | 5  | 2 | 3 | 25396.99 | 72725.83 | 77718.93 |
| 456.1581 | 9.193308 | 9.101033 | 9.280533 | 8  | 5 | 3 | 14031081 | 33076589 | 21975646 |
| 501.4019 | 19.74542 | 19.7225  | 19.887   | 10 | 5 | 5 | 4993251  | 20081064 | 21956016 |
| 319.1058 | 20.43058 | 20.411   | 20.53867 | 6  | 3 | 3 | 185682.7 | 603591.3 | 786209.2 |
| 441.362  | 28.76167 | 28.74283 | 28.78417 | 10 | 5 | 5 | 1003809  | 4338072  | 5050970  |
| 472.2153 | 20.64217 | 20.61367 | 20.77617 | 7  | 2 | 5 | 214737.5 | 692283.8 | 925654.2 |
| 216.1387 | 15.8511  | 15.81567 | 15.93323 | 8  | 5 | 3 | 91876.84 | 399615.2 | 357473.3 |
| 269.1476 | 16.93158 | 16.88917 | 16.96917 | 10 | 5 | 5 | 659263.6 | 3045580  | 3494973  |
| 502.9054 | 9.194167 | 9.116917 | 9.302183 | 4  | 4 | 0 | 1309755  | 1421496  | 1689433  |
| 458.1914 | 14.99495 | 14.96272 | 15.01173 | 5  | 1 | 4 | 49850.73 | 106032   | 175262.5 |
| 382.296  | 23.29908 | 23.28083 | 23.33983 | 4  | 1 | 3 | 35918.48 | 93018.59 | 108410.2 |
| 692.2631 | 30.26683 | 30.25    | 30.33317 | 6  | 3 | 3 | 95652.41 | 335853.1 | 366892.5 |
| 380.2953 | 23.13275 | 23.10367 | 23.1535  | 6  | 3 | 3 | 56839.45 | 159581.1 | 188678.8 |
| 272.2095 | 20.9775  | 20.94433 | 21.03417 | 5  | 2 | 3 | 74300.02 | 376275.1 | 342353.1 |
| 484.1087 | 15.88583 | 15.84463 | 15.92058 | 6  | 2 | 4 | 217126.3 | 685746.7 | 1473133  |
| 500.2042 | 24.75925 | 24.69583 | 24.78533 | 6  | 2 | 4 | 61170.18 | 239327.4 | 291730.6 |

|          |          |          |          |    |   |   |          |          |          |
|----------|----------|----------|----------|----|---|---|----------|----------|----------|
| 646.4387 | 21.5295  | 21.44083 | 21.56533 | 8  | 3 | 5 | 118714.5 | 391535.6 | 480033.4 |
| 305.2692 | 28.11767 | 28.04433 | 28.16133 | 10 | 5 | 5 | 410893.7 | 1556914  | 1879506  |
| 333.1705 | 22.05833 | 21.98917 | 22.09317 | 5  | 3 | 2 | 83916.5  | 187125.8 | 199950.4 |
| 541.3737 | 10.97941 | 10.92607 | 10.99405 | 6  | 2 | 4 | 105470.1 | 244360.6 | 293287   |
| 161.0598 | 23.88467 | 23.83983 | 23.93767 | 9  | 4 | 5 | 134521.6 | 609817.5 | 674074.2 |
| 255.2322 | 27.51833 | 27.39967 | 27.56233 | 7  | 3 | 4 | 395621.6 | 2835517  | 2624272  |
| 569.3148 | 7.364667 | 7.352633 | 7.393067 | 5  | 2 | 3 | 3948260  | 4955885  | 8532271  |
| 176.5104 | 19.34175 | 19.326   | 19.3495  | 6  | 2 | 4 | 61542    | 177433.3 | 250548   |
| 456.0771 | 13.711   | 13.44777 | 13.76545 | 7  | 1 | 4 | 227381.6 | 593907.8 | 1287702  |
| 306.3328 | 22.99917 | 22.97417 | 23.09333 | 5  | 2 | 3 | 42455224 | 94484181 | 1.61E+08 |
| 785.182  | 29.11083 | 29.09583 | 29.12433 | 5  | 4 | 1 | 48675.7  | 100670.3 | 78811.04 |
| 221.1541 | 25.79267 | 25.71517 | 25.83717 | 10 | 5 | 5 | 1498988  | 6737509  | 6120089  |
| 308.2519 | 18.2975  | 18.27233 | 18.335   | 7  | 2 | 5 | 141310.1 | 767287.7 | 978352.1 |
| 232.1698 | 31.76333 | 31.62617 | 31.8165  | 8  | 4 | 4 | 108973.9 | 444822.4 | 436256.7 |
| 389.589  | 8.90875  | 8.730367 | 8.980533 | 7  | 4 | 3 | 446180.8 | 982459.7 | 520172.2 |
| 543.0439 | 22.13708 | 22.03667 | 22.16383 | 6  | 1 | 5 | 150903.1 | 331604   | 507465.3 |
| 559.408  | 16.44117 | 16.42682 | 16.49523 | 5  | 2 | 3 | 39251.82 | 61918.38 | 89956.3  |
| 162.0996 | 28.10917 | 28.05933 | 28.14683 | 3  | 0 | 3 | 40059.64 | 106631.4 | 106090.6 |
| 535.0381 | 32.9305  | 32.91833 | 32.94183 | 3  | 0 | 3 | 46333.77 | 111843.3 | 128470.2 |
| 519.5963 | 32.10233 | 32.07183 | 32.19283 | 9  | 5 | 4 | 94017.59 | 498769.1 | 554838.4 |
| 526.3129 | 24.5785  | 24.50433 | 24.635   | 6  | 3 | 3 | 79685.85 | 352465.1 | 312110.8 |
| 325.3217 | 31.40483 | 31.35767 | 31.47067 | 10 | 5 | 5 | 823385.3 | 5205984  | 5419779  |
| 652.9479 | 27.17583 | 27.14367 | 27.208   | 6  | 2 | 4 | 107811.9 | 310934.9 | 454566.3 |
| 724.5121 | 9.482133 | 9.444983 | 9.537367 | 4  | 1 | 3 | 38670888 | 33019818 | 59571798 |
| 428.9394 | 12.52435 | 12.50022 | 12.74887 | 4  | 1 | 3 | 157357.7 | 579564.8 | 957310.8 |
| 307.8524 | 23.04517 | 22.97417 | 23.074   | 9  | 4 | 5 | 177761.3 | 868666.4 | 768959.6 |
| 340.1395 | 29.34942 | 29.30383 | 29.41867 | 6  | 4 | 2 | 165653.8 | 317213.9 | 331463.5 |
| 960.4547 | 10.70994 | 10.63528 | 10.77118 | 4  | 0 | 4 | 494759.6 | 472079.9 | 902655.9 |
| 325.1436 | 28.04383 | 27.926   | 28.07333 | 5  | 3 | 2 | 74532.11 | 321032.3 | 318755.6 |
| 313.1801 | 37.713   | 37.6765  | 37.7365  | 5  | 3 | 2 | 85331.11 | 337834.7 | 119827.6 |
| 662.9925 | 20.65667 | 20.65617 | 20.687   | 3  | 0 | 3 | 166374.8 | 697777.7 | 979668.7 |
| 216.0192 | 21.70958 | 21.63433 | 21.75667 | 4  | 1 | 3 | 53044.08 | 153378   | 152914.5 |
| 453.6045 | 9.187083 | 9.135433 | 9.322017 | 3  | 3 | 0 | 5971598  | 6498340  | 7565476  |
| 251.0685 | 11.0508  | 10.89807 | 11.13185 | 5  | 2 | 3 | 106086.3 | 390075.4 | 561682.7 |
| 444.1172 | 35.14717 | 35.147   | 35.20483 | 5  | 2 | 3 | 31963.86 | 85152.55 | 96409.55 |
| 654.2469 | 10.85052 | 10.83477 | 10.87918 | 5  | 2 | 3 | 284171.3 | 294338.9 | 503723.8 |
| 379.187  | 26.44483 | 26.41383 | 26.47767 | 7  | 4 | 3 | 214268.9 | 512644.5 | 597519.1 |
| 316.9413 | 11.0656  | 10.83542 | 11.09677 | 4  | 1 | 3 | 385615.4 | 1381765  | 2699987  |
| 770.9575 | 10.06564 | 10.04143 | 10.07255 | 4  | 1 | 3 | 194059   | 155243.6 | 221237   |
| 392.1375 | 19.68733 | 19.67333 | 19.8     | 9  | 4 | 5 | 1000885  | 3376609  | 4816113  |
| 194.0095 | 30.79183 | 30.67617 | 30.83717 | 9  | 4 | 5 | 265510.5 | 1556691  | 1490380  |
| 423.1757 | 17.663   | 17.60433 | 17.67783 | 5  | 3 | 2 | 50875.1  | 122199.7 | 96902.83 |
| 397.1117 | 22.98233 | 22.938   | 23.01883 | 10 | 5 | 5 | 2941447  | 12235366 | 14250021 |
| 618.4703 | 28.81933 | 28.79017 | 28.8375  | 7  | 3 | 4 | 162056.5 | 624422.7 | 754398.4 |
| 572.9448 | 16.68417 | 16.67583 | 16.72017 | 5  | 1 | 4 | 92717.79 | 220523.3 | 429008.1 |
| 461.3742 | 28.63342 | 28.52083 | 28.681   | 10 | 5 | 5 | 1694157  | 13083000 | 14128952 |
| 420.2752 | 12.41884 | 12.37127 | 12.54948 | 8  | 3 | 5 | 189062.4 | 709304.3 | 769289.5 |

|          |          |          |          |    |   |   |          |          |          |
|----------|----------|----------|----------|----|---|---|----------|----------|----------|
| 291.2534 | 28.42717 | 28.3955  | 28.439   | 10 | 5 | 5 | 6118279  | 32502226 | 35604125 |
| 748.4155 | 10.67828 | 10.599   | 10.77118 | 9  | 5 | 4 | 7989954  | 12535547 | 18671235 |
| 319.2483 | 33.757   | 33.726   | 33.7735  | 5  | 2 | 3 | 44171.76 | 204365.5 | 100638.5 |
| 426.0211 | 25.69217 | 25.61933 | 25.7115  | 7  | 2 | 5 | 83877.32 | 242489.4 | 359164   |
| 333.0968 | 26.74017 | 26.6765  | 26.78117 | 9  | 4 | 5 | 142085.1 | 497678.6 | 544825.1 |
| 175.0644 | 19.5535  | 19.515   | 19.58533 | 7  | 2 | 5 | 133520.6 | 431693.1 | 545027.7 |
| 563.0187 | 18.13833 | 18.09117 | 18.1585  | 7  | 3 | 4 | 232817.4 | 787340.9 | 1145850  |
| 604.4142 | 29.907   | 29.875   | 29.92583 | 7  | 5 | 2 | 60893.73 | 361208.9 | 89031.12 |
| 313.1052 | 19.4745  | 19.428   | 19.52583 | 5  | 2 | 3 | 111106.3 | 291499   | 145876.5 |
| 394.1327 | 19.7045  | 19.67333 | 19.74733 | 8  | 3 | 5 | 347399.6 | 1069547  | 1569436  |
| 822.1203 | 30.98692 | 30.95017 | 31.0515  | 4  | 1 | 3 | 77732.96 | 200733.2 | 355010   |
| 219.1747 | 19.87817 | 19.87483 | 19.99017 | 5  | 2 | 3 | 614038.4 | 2819520  | 3543388  |
| 162.9736 | 5.600083 | 5.545033 | 5.737783 | 3  | 3 | 0 | 221800.7 | 1879470  | 618822.2 |
| 569.4762 | 9.574775 | 9.500283 | 9.792867 | 4  | 4 | 0 | 735056.4 | 1056952  | 1151436  |
| 394.3111 | 28.1615  | 28.12433 | 28.19167 | 7  | 3 | 4 | 58893.26 | 276029.1 | 312265.1 |
| 597.0805 | 27.87992 | 27.76383 | 27.9155  | 8  | 3 | 5 | 999885.5 | 3349135  | 4556213  |
| 166.0946 | 25.8135  | 25.71833 | 25.85433 | 5  | 3 | 2 | 31815.27 | 82518.36 | 72307.49 |
| 786.5233 | 31.59083 | 31.55767 | 31.63033 | 8  | 4 | 4 | 64700.57 | 350226.2 | 226617.2 |
| 398.0832 | 13.00105 | 12.90555 | 13.10817 | 5  | 1 | 3 | 28828.48 | 54006.85 | 54857.86 |
| 446.2242 | 16.4716  | 16.47097 | 16.50995 | 4  | 1 | 3 | 37902.13 | 118295.3 | 76195.22 |
| 542.4331 | 36.30758 | 36.29117 | 36.45567 | 10 | 5 | 5 | 82204.09 | 378229.7 | 218696.6 |
| 405.1961 | 39.38667 | 39.298   | 39.40183 | 3  | 0 | 3 | 22012.97 | 45938.48 | 22629.62 |
| 476.3287 | 9.186758 | 9.101033 | 9.266617 | 6  | 4 | 2 | 3.85E+08 | 1.76E+09 | 1.65E+09 |
| 163.1331 | 10.07312 | 9.631183 | 10.12338 | 8  | 2 | 4 | 187583.1 | 387914.8 | 395055.6 |
| 493.1584 | 10.36339 | 10.3514  | 10.42227 | 4  | 0 | 4 | 4752101  | 6707785  | 10798472 |
| 760.5432 | 34.39342 | 34.35167 | 34.41517 | 10 | 5 | 5 | 3906721  | 20192082 | 24337585 |
| 318.0829 | 15.89132 | 15.80118 | 15.91033 | 5  | 2 | 3 | 1003744  | 1615609  | 1828562  |
| 392.0924 | 30.80625 | 30.761   | 30.87583 | 4  | 1 | 3 | 70557.71 | 204604.1 | 276137.6 |
| 537.346  | 26.98583 | 26.922   | 27.05917 | 10 | 5 | 5 | 372449.1 | 1774054  | 1638873  |
| 304.0669 | 13.5054  | 13.43332 | 13.73835 | 5  | 1 | 3 | 398875.7 | 1407747  | 2658810  |
| 355.0846 | 23.72183 | 23.70667 | 23.75267 | 3  | 0 | 3 | 52183.06 | 187686.9 | 188986.7 |
| 177.08   | 21.1365  | 21.05833 | 21.17    | 6  | 2 | 4 | 177943.2 | 531839.7 | 335279.1 |
| 435.194  | 33.284   | 33.24683 | 33.31783 | 4  | 1 | 3 | 35825.1  | 121176.2 | 130856.1 |
| 430.317  | 20.19108 | 20.15467 | 20.35917 | 8  | 4 | 4 | 91215.68 | 312325.1 | 324350.1 |
| 393.21   | 8.786833 | 8.51555  | 8.864233 | 6  | 3 | 3 | 1070590  | 4678909  | 4696011  |
| 510.2857 | 10.2133  | 10.12773 | 10.23408 | 5  | 2 | 3 | 110663.8 | 212765.8 | 275521.9 |
| 269.1905 | 26.58533 | 26.47217 | 26.60417 | 6  | 3 | 3 | 125431.7 | 954437.8 | 949391.7 |
| 403.103  | 13.73835 | 13.71057 | 13.78467 | 5  | 2 | 3 | 56538.12 | 174027.3 | 166717.9 |
| 330.2124 | 35.58967 | 35.5775  | 35.666   | 3  | 0 | 3 | 39253.21 | 183448.2 | 42369.15 |
| 353.2653 | 37.70433 | 37.66133 | 37.721   | 5  | 2 | 3 | 78397.55 | 206563.7 | 82139.98 |
| 277.1288 | 11.17027 | 11.16608 | 11.18192 | 3  | 0 | 3 | 172413.2 | 365151.4 | 464321.6 |
| 492.2805 | 42.988   | 42.83033 | 43.27817 | 7  | 3 | 2 | 49586.93 | 573703.6 | 171546.1 |
| 472.8197 | 9.192183 | 9.101033 | 9.280533 | 7  | 5 | 2 | 6826406  | 8737784  | 9838927  |
| 879.6107 | 31.76825 | 31.74583 | 31.81    | 6  | 2 | 4 | 43468.3  | 149330.5 | 186160.3 |
| 502.9645 | 22.142   | 22.03667 | 22.1655  | 5  | 1 | 4 | 60862.76 | 181390.3 | 270440.5 |
| 459.0529 | 25.69158 | 25.6755  | 25.71367 | 4  | 0 | 4 | 79125.35 | 119433.2 | 251080.4 |
| 415.2123 | 19.74583 | 19.727   | 19.835   | 7  | 4 | 3 | 217892.3 | 973821.4 | 749703.5 |

|          |          |          |          |    |   |   |          |          |          |
|----------|----------|----------|----------|----|---|---|----------|----------|----------|
| 428.0294 | 18.13925 | 18.1035  | 18.189   | 6  | 2 | 4 | 213346.7 | 1069801  | 1599417  |
| 305.1202 | 33.94567 | 33.90033 | 33.9655  | 6  | 2 | 4 | 125275.9 | 292172.9 | 569377.8 |
| 397.3358 | 28.70233 | 28.69183 | 28.72133 | 10 | 5 | 5 | 865173.1 | 3938120  | 4518381  |
| 356.3167 | 20.58017 | 20.544   | 20.66717 | 9  | 4 | 5 | 139449.8 | 507765.5 | 583272.8 |
| 330.2341 | 18.32133 | 18.23833 | 18.3815  | 5  | 2 | 3 | 75800.67 | 276685.3 | 379543.9 |
| 290.2328 | 32.49733 | 32.37967 | 32.53617 | 10 | 5 | 5 | 1152823  | 5395966  | 6145948  |
| 572.4015 | 17.6205  | 17.60433 | 17.67767 | 5  | 1 | 4 | 101525.3 | 920586.7 | 1033940  |
| 241.072  | 18.1315  | 18.0555  | 18.1595  | 10 | 5 | 5 | 1545404  | 7846444  | 10543833 |
| 305.1711 | 16.53956 | 16.5011  | 16.589   | 4  | 3 | 1 | 31181.08 | 74487.25 | 54990.2  |
| 570.4581 | 35.371   | 35.33783 | 35.4005  | 6  | 2 | 4 | 855244.7 | 9274904  | 9984855  |
| 312.98   | 27.17975 | 27.12967 | 27.22267 | 6  | 2 | 4 | 58499.94 | 122299   | 190360.5 |
| 329.2689 | 40.27933 | 40.21933 | 40.2965  | 5  | 2 | 3 | 66400.63 | 316636   | 320404.5 |
| 724.5929 | 31.13233 | 31.0805  | 31.18367 | 10 | 5 | 5 | 1312508  | 3777091  | 3548298  |
| 303.2172 | 17.711   | 17.70633 | 17.74283 | 10 | 5 | 5 | 172516.3 | 718082.5 | 624287.5 |
| 240.1657 | 20.453   | 20.411   | 20.55133 | 5  | 2 | 3 | 62388.96 | 254738.6 | 207216.4 |
| 318.0427 | 30.4565  | 30.38217 | 30.48833 | 5  | 2 | 3 | 365486.4 | 1008458  | 2097512  |
| 694.1751 | 27.4655  | 27.427   | 27.53083 | 8  | 3 | 5 | 741310.3 | 3347728  | 4492831  |
| 393.337  | 18.92317 | 18.89467 | 19.02567 | 6  | 2 | 4 | 43555916 | 52613999 | 61917331 |
| 360.3267 | 19.29067 | 19.2755  | 19.30533 | 9  | 4 | 5 | 243658.5 | 947799.9 | 1079100  |
| 499.8548 | 33.7205  | 33.71467 | 33.726   | 3  | 0 | 3 | 54044.79 | 179539.2 | 209272.3 |
| 412.9986 | 19.54367 | 19.4575  | 19.63    | 6  | 2 | 4 | 86580.83 | 247692.1 | 467748.7 |
| 711.5002 | 29.87742 | 29.8495  | 29.91617 | 6  | 3 | 3 | 40384.99 | 163796.1 | 52110.11 |
| 252.1319 | 14.95072 | 14.93573 | 14.97753 | 5  | 1 | 4 | 28026.38 | 81716.75 | 87500.96 |
| 559.0914 | 25.92308 | 25.91817 | 25.94567 | 4  | 1 | 3 | 48947.45 | 79923.49 | 159829.8 |
| 205.0861 | 41.70892 | 41.634   | 41.73483 | 8  | 3 | 5 | 94454.38 | 1311449  | 404482.2 |
| 485.298  | 9.199792 | 9.101033 | 9.243133 | 4  | 3 | 1 | 5435859  | 5966889  | 7621005  |
| 277.2014 | 17.68642 | 17.63367 | 17.71    | 10 | 5 | 5 | 94037.2  | 558462.5 | 288673.2 |
| 427.1245 | 19.70183 | 19.67333 | 19.8     | 5  | 2 | 3 | 323038.7 | 793478.4 | 1283375  |
| 357.2616 | 28.61283 | 28.59867 | 28.62833 | 10 | 5 | 5 | 361471.4 | 1264595  | 1648769  |
| 425.2748 | 10.41202 | 10.36557 | 10.45178 | 5  | 3 | 2 | 5389078  | 8419903  | 15234841 |
| 155.0027 | 2.180517 | 2.06435  | 2.377483 | 8  | 5 | 3 | 185816.3 | 1590386  | 820474.5 |
| 462.3584 | 20.84367 | 20.80517 | 20.86083 | 10 | 5 | 5 | 4829135  | 18251416 | 21693157 |
| 466.3298 | 21.844   | 21.7995  | 21.93617 | 9  | 4 | 5 | 145313.3 | 609744.3 | 535093.1 |
| 222.1574 | 25.78833 | 25.71517 | 25.8205  | 8  | 4 | 4 | 185061.9 | 651361.9 | 608696   |
| 373.2589 | 36.66717 | 36.66433 | 36.69483 | 7  | 3 | 4 | 157300   | 701849.3 | 552159.2 |
| 276.6339 | 9.182542 | 9.101033 | 9.243133 | 4  | 4 | 0 | 1732510  | 3272326  | 4478043  |
| 257.2671 | 23.6645  | 23.64933 | 23.70667 | 5  | 2 | 3 | 52575.45 | 147089.4 | 181026.7 |
| 518.8754 | 44.01725 | 43.99667 | 44.03417 | 4  | 1 | 3 | 47820.55 | 279251.6 | 67171.53 |
| 421.3435 | 23.74467 | 23.72033 | 23.79483 | 6  | 2 | 4 | 128998.4 | 252342.3 | 256185.6 |
| 399.2702 | 29.67367 | 29.6215  | 29.72567 | 4  | 3 | 1 | 41978420 | 57499804 | 1.23E+08 |
| 163.0755 | 28.86417 | 28.67283 | 28.98683 | 12 | 5 | 5 | 1875958  | 21978219 | 26215301 |
| 511.4229 | 15.85152 | 15.74832 | 15.91817 | 7  | 3 | 4 | 88722.57 | 183830.3 | 264568.6 |
| 515.4174 | 22.43183 | 22.39567 | 22.473   | 6  | 3 | 3 | 50011.73 | 149359.8 | 149423.1 |
| 558.3857 | 21.23192 | 21.15667 | 21.264   | 8  | 3 | 5 | 148785   | 569212   | 688664.2 |
| 496.3607 | 44.17967 | 44.15917 | 44.25667 | 7  | 4 | 3 | 52060.79 | 515564.5 | 174781.8 |
| 434.2749 | 44.37108 | 44.31617 | 44.4925  | 4  | 3 | 1 | 53554.96 | 488024.4 | 82715.08 |
| 287.7543 | 22.73833 | 22.71633 | 22.78383 | 7  | 3 | 4 | 50496.07 | 176630.1 | 257277.6 |

|          |          |          |          |    |   |   |          |          |          |
|----------|----------|----------|----------|----|---|---|----------|----------|----------|
| 572.3625 | 30.26775 | 30.23533 | 30.36167 | 10 | 5 | 5 | 1205732  | 5697120  | 5013570  |
| 489.3399 | 28.8075  | 28.80467 | 28.81017 | 5  | 2 | 3 | 67328.36 | 212119.8 | 247501.8 |
| 445.2206 | 16.47748 | 16.44078 | 16.51398 | 10 | 5 | 5 | 202424.8 | 874498.9 | 761760.4 |
| 290.2485 | 19.76525 | 19.74833 | 19.86983 | 8  | 3 | 5 | 102392.1 | 525657.1 | 302798.2 |
| 433.2059 | 17.27333 | 17.2395  | 17.327   | 10 | 5 | 5 | 656406.5 | 2856482  | 3144587  |
| 287.0636 | 10.40814 | 10.36523 | 10.43652 | 4  | 1 | 3 | 690977.5 | 861116.1 | 1660731  |
| 548.0451 | 29.20675 | 29.18433 | 29.32917 | 10 | 5 | 5 | 168424.6 | 896114.4 | 775842.1 |
| 654.3885 | 41.1335  | 41.10383 | 41.25483 | 5  | 2 | 3 | 421720   | 1226112  | 1213342  |
| 490.3655 | 29.98683 | 29.92967 | 30.05683 | 7  | 4 | 3 | 35571.51 | 212104.5 | 48280.98 |
| 335.2797 | 28.6105  | 28.58283 | 28.61483 | 10 | 5 | 5 | 4315863  | 22630299 | 24866930 |
| 340.9551 | 9.518825 | 9.444983 | 9.549217 | 4  | 1 | 3 | 11542694 | 13302510 | 22139590 |
| 667.2602 | 29.11858 | 29.08083 | 29.16833 | 6  | 4 | 2 | 164317.4 | 339577.7 | 393099.6 |
| 572.929  | 17.95667 | 17.855   | 18.004   | 4  | 1 | 3 | 129271.1 | 382379.4 | 583281.4 |
| 694.1748 | 27.77533 | 27.7505  | 28.07333 | 7  | 2 | 4 | 473433   | 2053591  | 2773673  |
| 654.8346 | 41.19317 | 41.1635  | 41.23617 | 9  | 5 | 4 | 459512   | 1365180  | 1792300  |
| 471.1795 | 14.0009  | 13.96152 | 14.05753 | 7  | 2 | 5 | 178562.3 | 559839.5 | 1041179  |
| 334.099  | 22.13175 | 22.03667 | 22.14983 | 4  | 1 | 3 | 121071   | 352878.4 | 484260.7 |
| 358.9394 | 9.49235  | 9.401867 | 9.537367 | 3  | 0 | 3 | 9746555  | 8830173  | 18038255 |
| 359.2051 | 25.99525 | 25.947   | 26.04517 | 8  | 4 | 4 | 289331.7 | 1038465  | 1207632  |
| 387.1046 | 23.282   | 23.25383 | 23.3375  | 9  | 4 | 5 | 85557.59 | 356330.2 | 390662.5 |
| 436.3063 | 25.18233 | 25.11233 | 25.23083 | 9  | 4 | 5 | 124615   | 622340.1 | 508897.2 |
| 650.4942 | 41.20783 | 41.1635  | 41.23617 | 7  | 3 | 4 | 41702.66 | 189837.2 | 120767.6 |
| 233.5986 | 9.537367 | 9.534967 | 9.545617 | 3  | 0 | 3 | 3383500  | 2746997  | 5831568  |
| 465.3817 | 26.238   | 26.18667 | 26.33183 | 5  | 3 | 2 | 22718.25 | 78266.19 | 81104.65 |
| 237.1851 | 31.716   | 31.58383 | 31.78267 | 7  | 3 | 4 | 522090.6 | 1773717  | 1699137  |
| 407.2965 | 11.45451 | 11.31883 | 11.65552 | 8  | 4 | 4 | 448681.1 | 1475979  | 1997682  |
| 281.0955 | 18.13892 | 18.0555  | 18.17483 | 10 | 5 | 5 | 12732430 | 69828043 | 90362305 |
| 306.3099 | 23.022   | 22.99917 | 23.06267 | 4  | 1 | 3 | 43257760 | 1.5E+08  | 1.9E+08  |
| 422.2488 | 17.81475 | 17.76617 | 17.85483 | 6  | 2 | 4 | 52160.71 | 266367   | 127257.2 |
| 273.2063 | 32.95233 | 32.87817 | 32.99867 | 9  | 4 | 5 | 2647254  | 19488968 | 17622164 |
| 480.3447 | 32.36175 | 32.21783 | 32.55467 | 10 | 5 | 5 | 582592.3 | 2909418  | 2779656  |
| 391.2385 | 34.49483 | 34.385   | 34.51567 | 5  | 2 | 3 | 36945.3  | 158437.3 | 142679.5 |
| 423.3321 | 28.76258 | 28.75417 | 28.78417 | 10 | 5 | 5 | 1989163  | 10733022 | 12260850 |
| 443.0418 | 22.12567 | 22.05267 | 22.1715  | 8  | 3 | 5 | 284261.6 | 1308887  | 1786765  |
| 404.2362 | 35.0285  | 34.91017 | 35.044   | 5  | 3 | 2 | 34943.25 | 307950.9 | 104724.7 |
| 424.358  | 19.44267 | 19.418   | 19.48333 | 7  | 3 | 4 | 81158.4  | 187613.5 | 226758   |
| 219.1746 | 11.94053 | 11.9344  | 11.95635 | 4  | 1 | 3 | 1099178  | 3479350  | 5258863  |
| 825.3556 | 10.68813 | 10.599   | 10.77118 | 8  | 4 | 4 | 24049278 | 55782901 | 1.14E+08 |
| 293.1391 | 23.39058 | 23.3445  | 23.41417 | 4  | 1 | 3 | 26407.25 | 62580.78 | 50418.26 |
| 742.1755 | 26.87017 | 26.81367 | 26.919   | 7  | 2 | 5 | 203472.9 | 722272.7 | 981019.6 |
| 825.612  | 31.44883 | 31.39017 | 31.45333 | 5  | 5 | 0 | 47932.76 | 156042.9 | 75795.64 |
| 523.3845 | 35.47067 | 35.42017 | 35.49033 | 7  | 3 | 4 | 57748.55 | 289529.4 | 353243.3 |
| 503.4086 | 19.75275 | 19.74033 | 19.887   | 8  | 4 | 4 | 142197.2 | 442596.1 | 493161.6 |
| 225.0608 | 31.58517 | 31.50383 | 31.61533 | 4  | 3 | 1 | 31890.53 | 105412.2 | 30807.36 |
| 427.1401 | 15.67018 | 15.54255 | 15.6747  | 5  | 1 | 4 | 66476.49 | 210015.9 | 378834.9 |
| 286.0742 | 18.13833 | 18.07617 | 18.158   | 7  | 3 | 4 | 269880.2 | 1231181  | 1651718  |
| 392.116  | 17.5455  | 17.50183 | 17.5815  | 6  | 2 | 4 | 196633   | 624481.7 | 1086036  |

|          |          |          |          |    |   |   |          |          |          |
|----------|----------|----------|----------|----|---|---|----------|----------|----------|
| 306.2919 | 23.0335  | 22.728   | 23.06783 | 11 | 5 | 5 | 43257760 | 2.28E+08 | 2.43E+08 |
| 335.2224 | 16.0231  | 15.9643  | 16.039   | 6  | 4 | 2 | 453648.2 | 1653100  | 1692560  |
| 258.0802 | 22.119   | 22.04233 | 22.14983 | 8  | 3 | 5 | 362281.8 | 1263196  | 1665052  |
| 378.0978 | 25.02808 | 24.99383 | 25.07817 | 8  | 4 | 4 | 302801.4 | 1034204  | 1424581  |
| 725.616  | 9.482133 | 9.444983 | 9.537367 | 4  | 1 | 3 | 45763580 | 37984489 | 68113907 |
| 552.2709 | 9.178    | 9.101033 | 9.26485  | 5  | 4 | 1 | 2775028  | 6274760  | 2220576  |
| 235.1219 | 25.93025 | 25.91633 | 25.9615  | 4  | 1 | 3 | 37975.58 | 88198.61 | 71898.85 |
| 544.3404 | 29.20675 | 29.16983 | 29.31467 | 10 | 5 | 5 | 40659568 | 3.03E+08 | 2.79E+08 |
| 359.2152 | 9.537367 | 9.3803   | 9.63195  | 5  | 1 | 3 | 29429998 | 76854254 | 95430546 |
| 157.0837 | 5.744642 | 5.50905  | 5.820367 | 4  | 3 | 0 | 526484.4 | 5142803  | 5844636  |
| 555.176  | 42.73592 | 42.67917 | 42.7635  | 10 | 5 | 5 | 456097.9 | 2621937  | 1635176  |
| 684.6552 | 9.515    | 9.473767 | 9.57815  | 7  | 3 | 4 | 5473177  | 12951192 | 9730880  |
| 350.2408 | 34.7655  | 34.74983 | 34.8665  | 3  | 0 | 3 | 79273.85 | 491726.8 | 164349.3 |
| 320.0922 | 18.12142 | 18.09117 | 18.14367 | 6  | 2 | 4 | 168230.4 | 506040.3 | 669740.4 |
| 286.1889 | 24.853   | 24.83133 | 24.88917 | 7  | 3 | 4 | 123214.5 | 416311.6 | 524160.4 |
| 582.2959 | 29.215   | 29.16967 | 29.23017 | 5  | 5 | 0 | 58947.73 | 220578.9 | 184853.4 |
| 714.5381 | 25.82192 | 25.74983 | 25.88917 | 8  | 4 | 4 | 200670.7 | 528134.5 | 682061.1 |
| 749.4186 | 10.69263 | 10.64867 | 10.78962 | 7  | 3 | 4 | 1757487  | 2618583  | 3403985  |
| 587.3045 | 21.07242 | 21.0115  | 21.0915  | 6  | 2 | 4 | 1110755  | 1999338  | 2758817  |
| 503.122  | 12.42175 | 12.35715 | 12.4731  | 3  | 0 | 3 | 31034.78 | 68237.88 | 99998.86 |
| 631.4475 | 10.86975 | 10.86473 | 10.89347 | 3  | 0 | 3 | 142112   | 121269.7 | 218162.3 |
| 777.6974 | 15.46852 | 15.41618 | 15.48337 | 7  | 2 | 5 | 86772.97 | 331392.2 | 439728.2 |
| 413.3165 | 32.36517 | 32.31667 | 32.4155  | 8  | 4 | 4 | 336825.3 | 1238185  | 1782120  |
| 384.2961 | 23.10517 | 23.05983 | 23.13583 | 9  | 4 | 5 | 239528.5 | 947960.5 | 1064130  |
| 552.0623 | 21.02875 | 20.93383 | 21.0485  | 6  | 2 | 4 | 140987.9 | 328935.4 | 515306.2 |
| 254.637  | 9.199533 | 9.101033 | 9.2529   | 9  | 5 | 4 | 61610144 | 1.16E+08 | 1.83E+08 |
| 365.6834 | 9.534167 | 9.4881   | 9.5558   | 4  | 1 | 3 | 3793524  | 4338708  | 7463091  |
| 283.1359 | 38.14225 | 38.093   | 38.22983 | 6  | 1 | 5 | 57589.89 | 262379.4 | 96085.95 |
| 318.1087 | 21.13817 | 21.05833 | 21.17    | 7  | 2 | 5 | 878343.1 | 2120338  | 2173673  |
| 400.8448 | 10.43611 | 10.3779  | 10.52207 | 4  | 1 | 3 | 376626.5 | 670226   | 721772.1 |
| 366.1004 | 20.28483 | 20.28083 | 20.29067 | 5  | 2 | 3 | 76765.23 | 252801.6 | 288987.4 |
| 512.3881 | 28.80817 | 28.77283 | 28.823   | 9  | 4 | 5 | 178092.6 | 821890.9 | 987528.8 |
| 445.0373 | 22.11158 | 22.03667 | 22.14983 | 6  | 1 | 5 | 105290   | 416462.1 | 545381.1 |
| 288.2425 | 11.20343 | 11.02648 | 11.21608 | 6  | 2 | 4 | 131841.2 | 425222   | 440169.4 |
| 279.1439 | 30.80633 | 30.784   | 30.84967 | 3  | 0 | 3 | 770746.3 | 2271934  | 2107655  |
| 250.1609 | 6.193717 | 5.9699   | 6.371333 | 5  | 3 | 2 | 5259234  | 64111019 | 56221711 |
| 538.4317 | 43.27758 | 43.248   | 43.30783 | 4  | 1 | 3 | 21488.71 | 86713.84 | 35882.06 |
| 529.1434 | 22.11417 | 22.03667 | 22.14983 | 8  | 3 | 5 | 209902   | 932417.3 | 1203594  |
| 316.2278 | 30.12017 | 30.02733 | 30.13367 | 7  | 3 | 4 | 160063   | 644840.8 | 715297.9 |
| 321.2906 | 23.10367 | 23.0875  | 23.1535  | 5  | 3 | 2 | 50046.84 | 122485.7 | 150863.6 |
| 747.5208 | 42.71042 | 42.636   | 42.74967 | 6  | 2 | 4 | 35877.07 | 158568.2 | 63806.81 |
| 526.4376 | 23.6865  | 23.6715  | 23.707   | 6  | 2 | 4 | 48487.19 | 152235.3 | 198338.7 |
| 175.5563 | 16.69283 | 16.63858 | 16.70467 | 5  | 2 | 3 | 29339.52 | 60998.48 | 81277.01 |
| 548.2442 | 28.08833 | 28.07333 | 28.1785  | 5  | 2 | 3 | 394645.8 | 1836648  | 2347235  |
| 236.1647 | 29.7555  | 29.69567 | 29.79767 | 4  | 1 | 3 | 56459.95 | 163920.6 | 166650.2 |
| 572.3716 | 32.71533 | 32.646   | 32.83033 | 10 | 5 | 5 | 3125222  | 15436991 | 16128114 |
| 459.3216 | 32.50425 | 32.4595  | 32.55117 | 8  | 3 | 5 | 159408.2 | 676958   | 783383.8 |



|          |          |          |          |    |   |   |          |          |          |
|----------|----------|----------|----------|----|---|---|----------|----------|----------|
| 810.3776 | 23.74767 | 23.639   | 23.79683 | 9  | 4 | 5 | 230064.2 | 858861   | 1058286  |
| 460.0568 | 20.44133 | 20.4115  | 20.47867 | 4  | 1 | 3 | 127110.3 | 330911.5 | 479595.5 |
| 466.3289 | 10.93871 | 10.91052 | 10.9508  | 6  | 2 | 4 | 76198.19 | 111136.2 | 97712.14 |
| 894.6292 | 33.92717 | 33.90133 | 33.98017 | 6  | 2 | 4 | 38140.51 | 142070.7 | 181610.5 |
| 402.337  | 23.81375 | 23.72383 | 23.8255  | 6  | 3 | 3 | 241169.8 | 1420777  | 1691417  |
| 228.1035 | 24.49708 | 24.48167 | 24.50533 | 4  | 1 | 3 | 42166.9  | 87482.31 | 149384.5 |
| 913.2925 | 28.27817 | 28.25117 | 28.29367 | 5  | 2 | 3 | 29171.97 | 79957.51 | 98704.49 |
| 354.2857 | 22.36908 | 22.29433 | 22.38517 | 10 | 5 | 5 | 9685774  | 43467251 | 47087302 |
| 319.1609 | 43.6335  | 43.58917 | 43.64817 | 3  | 3 | 0 | 39070.96 | 542529.6 | 119686.4 |
| 363.2381 | 8.853533 | 8.747883 | 8.90875  | 5  | 2 | 3 | 310006.3 | 305403.5 | 301702.4 |
| 599.1155 | 20.6555  | 20.62233 | 20.7265  | 8  | 3 | 5 | 2126713  | 8164113  | 11406770 |
| 541.6663 | 29.21342 | 29.18433 | 29.31467 | 6  | 3 | 3 | 46304.41 | 216028.2 | 208723.2 |
| 718.4742 | 9.500283 | 9.473767 | 9.596683 | 9  | 5 | 4 | 12517078 | 30691204 | 32763287 |
| 815.3272 | 10.70767 | 10.63273 | 10.75237 | 7  | 2 | 5 | 2486614  | 6778553  | 11915666 |
| 454.3729 | 9.206217 | 9.132617 | 9.2938   | 4  | 3 | 1 | 21079678 | 19600771 | 20666201 |
| 315.2243 | 10.87195 | 10.83142 | 10.93685 | 4  | 1 | 3 | 168967   | 251733.3 | 332402.4 |
| 570.3185 | 7.3759   | 7.352633 | 7.378933 | 5  | 2 | 3 | 833287.6 | 1086265  | 1897805  |
| 482.2651 | 8.955617 | 8.78305  | 9.275233 | 6  | 3 | 3 | 417074.3 | 797892.5 | 866118.2 |
| 274.2745 | 24.646   | 24.56567 | 24.683   | 9  | 4 | 5 | 174867.8 | 596949.8 | 660617.3 |
| 219.1961 | 10.95827 | 10.82627 | 11.20103 | 8  | 4 | 4 | 250585.7 | 669396.6 | 778865.8 |
| 1142.063 | 10.67446 | 10.66473 | 10.69263 | 4  | 1 | 3 | 1086135  | 1070973  | 2383057  |
| 257.267  | 36.61017 | 36.57717 | 36.63333 | 5  | 2 | 3 | 59921.47 | 232499.4 | 266077.7 |
| 450.5554 | 9.199533 | 9.101033 | 9.280533 | 9  | 5 | 4 | 14179035 | 33214222 | 22274999 |
| 416.6898 | 32.13083 | 32.10233 | 32.13233 | 4  | 1 | 3 | 148938.1 | 252625.4 | 553388.4 |
| 485.3333 | 9.134867 | 8.92085  | 9.178    | 5  | 3 | 2 | 2791413  | 3106510  | 3181963  |
| 467.3583 | 28.79292 | 28.77283 | 28.81533 | 10 | 5 | 5 | 1458865  | 6843500  | 7937267  |
| 451.0504 | 33.96258 | 33.924   | 33.98017 | 4  | 1 | 3 | 41901.59 | 80585.89 | 178449.1 |
| 343.0166 | 22.11567 | 22.06867 | 22.17817 | 10 | 5 | 5 | 94581.92 | 584376.6 | 549246.4 |
| 305.0504 | 23.04517 | 22.97417 | 23.06783 | 7  | 3 | 4 | 70821.07 | 305950.9 | 353132.8 |
| 346.2535 | 22.385   | 22.29433 | 22.43817 | 5  | 2 | 3 | 601791.5 | 3273747  | 3406754  |
| 475.0068 | 42.97408 | 42.928   | 43.0025  | 4  | 1 | 3 | 61865    | 351260.2 | 95192.25 |
| 298.2463 | 26.85267 | 26.76533 | 26.8685  | 7  | 3 | 4 | 109047.6 | 583581.9 | 663898.9 |
| 386.2695 | 38.32192 | 38.29233 | 38.3375  | 8  | 3 | 5 | 254516.8 | 794877.9 | 718794   |
| 581.1046 | 20.64217 | 20.628   | 20.687   | 5  | 2 | 3 | 98107.94 | 230820.9 | 331969   |
| 316.9759 | 22.9905  | 22.97417 | 23.01433 | 6  | 2 | 4 | 83866.1  | 331294.7 | 413445.8 |
| 424.3354 | 28.76367 | 28.74283 | 28.77533 | 10 | 5 | 5 | 451107.6 | 2062944  | 2402871  |
| 378.1812 | 35.07092 | 35.0405  | 35.103   | 4  | 0 | 4 | 198378.4 | 1525383  | 439550.6 |
| 351.0531 | 14.95307 | 14.92117 | 14.99768 | 5  | 1 | 4 | 92338.09 | 263789   | 479005.4 |
| 177.1123 | 28.77017 | 28.7325  | 28.7945  | 6  | 2 | 4 | 99742.88 | 662451.2 | 472084.3 |
| 307.294  | 23.046   | 22.97417 | 23.06783 | 10 | 5 | 5 | 9277092  | 47153169 | 50676209 |
| 470.1823 | 14.02387 | 13.991   | 14.06243 | 4  | 1 | 3 | 99523.48 | 246433.1 | 470122.3 |
| 282.142  | 23.17983 | 23.10367 | 23.20917 | 9  | 4 | 5 | 86186.24 | 370736.7 | 304486.1 |
| 544.3314 | 26.87017 | 26.79817 | 26.919   | 9  | 4 | 5 | 192483.2 | 776123.6 | 635468   |
| 584.303  | 29.18433 | 29.14083 | 29.24117 | 5  | 2 | 3 | 240499.8 | 741623.1 | 626614.1 |
| 343.1208 | 16.76283 | 16.7435  | 16.78133 | 5  | 1 | 4 | 95037.3  | 224888.8 | 336336   |
| 285.1857 | 22.09017 | 22.005   | 22.107   | 8  | 4 | 4 | 583890.6 | 1859486  | 1945617  |
| 706.5233 | 28.80508 | 28.78783 | 28.823   | 8  | 3 | 5 | 92658.63 | 361217   | 465085.1 |

|          |          |          |          |    |   |   |          |          |          |
|----------|----------|----------|----------|----|---|---|----------|----------|----------|
| 328.2641 | 31.95133 | 31.88283 | 31.97133 | 7  | 3 | 4 | 205491.5 | 814157.5 | 1007749  |
| 461.3503 | 23.4305  | 23.38433 | 23.46133 | 9  | 5 | 4 | 841230.1 | 3775753  | 4149757  |
| 310.2101 | 25.61258 | 25.53183 | 25.63    | 8  | 4 | 4 | 458919.3 | 1401226  | 1739521  |
| 316.9304 | 17.9705  | 17.87    | 18.0795  | 7  | 3 | 4 | 550332.1 | 2397315  | 3665525  |
| 405.1004 | 22.04383 | 22.005   | 22.06467 | 5  | 2 | 3 | 69783.72 | 136297.4 | 206797.8 |
| 329.0002 | 18.1585  | 18.0745  | 18.19983 | 7  | 4 | 3 | 106086.1 | 439846.7 | 373605.4 |
| 511.1429 | 22.13925 | 22.03667 | 22.15067 | 6  | 2 | 4 | 281047.3 | 861219.4 | 1209189  |
| 363.3015 | 31.13325 | 30.87817 | 31.1955  | 12 | 5 | 5 | 452937.5 | 1123088  | 1284199  |
| 261.2427 | 31.5405  | 31.49917 | 31.58833 | 10 | 5 | 5 | 895027.4 | 3937796  | 4395569  |
| 341.2883 | 35.06517 | 35.0405  | 35.09983 | 4  | 0 | 4 | 93017.78 | 613489.6 | 195097.8 |
| 309.1263 | 23.0335  | 22.92367 | 23.06    | 5  | 2 | 3 | 824082.5 | 5428311  | 9152452  |
| 319.1211 | 10.9938  | 10.85052 | 11.20103 | 5  | 1 | 4 | 745624.8 | 2087879  | 3361066  |
| 363.1116 | 30.40333 | 30.25217 | 30.51683 | 6  | 3 | 3 | 219372.5 | 1102723  | 1246790  |
| 218.139  | 16.79567 | 16.73383 | 16.844   | 8  | 3 | 5 | 227100.5 | 1388752  | 1343224  |
| 476.3727 | 7.436833 | 7.40945  | 7.521283 | 4  | 1 | 3 | 2824868  | 2118523  | 2894644  |
| 547.3468 | 42.621   | 42.58783 | 42.6495  | 7  | 3 | 4 | 41577.89 | 206299.7 | 131793.2 |
| 385.2742 | 28.385   | 28.33317 | 28.47817 | 8  | 4 | 4 | 104032.4 | 353457.7 | 416754.4 |
| 491.3277 | 23.77808 | 23.76617 | 23.79683 | 6  | 2 | 4 | 54045.01 | 170680.5 | 183793.3 |
| 578.4179 | 29.95658 | 29.9205  | 29.97433 | 10 | 5 | 5 | 98961.38 | 983915.5 | 255315.9 |
| 397.2361 | 27.54075 | 27.4865  | 27.59317 | 8  | 4 | 4 | 60629.49 | 297268   | 261983.3 |
| 297.0827 | 42.74367 | 42.69367 | 42.75433 | 9  | 4 | 5 | 74383.79 | 523464.2 | 280907   |
| 342.2281 | 24.60117 | 24.535   | 24.63833 | 7  | 2 | 5 | 176599.8 | 615588.5 | 765916.2 |
| 355.9891 | 19.3495  | 19.29933 | 19.37217 | 9  | 4 | 5 | 988646.8 | 3868102  | 5453300  |
| 513.3987 | 31.89617 | 31.841   | 31.95133 | 6  | 3 | 3 | 43125.95 | 109295.6 | 122560.1 |
| 496.331  | 27.45867 | 27.43983 | 27.53083 | 9  | 4 | 5 | 502159.8 | 3030291  | 2996852  |
| 313.1343 | 22.10242 | 22.05267 | 22.1365  | 10 | 5 | 5 | 348613.5 | 1919500  | 1397336  |
| 451.1684 | 23.181   | 23.17983 | 23.20917 | 5  | 1 | 4 | 42406.17 | 68640.9  | 97785.12 |
| 363.2584 | 10.69508 | 10.6035  | 10.86473 | 5  | 2 | 3 | 1.26E+08 | 2.61E+08 | 4.24E+08 |
| 256.6349 | 9.186383 | 9.15355  | 9.2529   | 5  | 2 | 3 | 2780633  | 3987638  | 5606738  |
| 400.8321 | 10.45238 | 10.35103 | 10.4628  | 3  | 0 | 3 | 455364.3 | 819901.6 | 755458.4 |
| 830.3544 | 10.69345 | 10.6177  | 10.75237 | 4  | 1 | 3 | 316570.6 | 631504.7 | 1157075  |
| 301.2081 | 20.64217 | 20.599   | 20.7355  | 7  | 3 | 4 | 79623.71 | 302495.7 | 250704.6 |
| 279.1001 | 18.13833 | 18.06983 | 18.158   | 9  | 4 | 5 | 703132.7 | 3333036  | 4325022  |
| 608.3869 | 9.203767 | 9.101033 | 9.2529   | 8  | 5 | 3 | 5653461  | 7777460  | 5421267  |
| 398.7935 | 11.4726  | 11.39747 | 11.64007 | 7  | 4 | 3 | 280635.9 | 865532   | 1206097  |
| 370.0271 | 18.12375 | 18.0745  | 18.1585  | 8  | 4 | 4 | 147303.6 | 787178   | 693547   |
| 184.1699 | 18.21758 | 18.1645  | 18.24417 | 6  | 4 | 2 | 96558.14 | 368387.8 | 359030.6 |
| 205.9723 | 19.3495  | 19.32383 | 19.364   | 5  | 2 | 3 | 50446.55 | 164661.7 | 233457.5 |
| 488.1739 | 12.50022 | 12.4807  | 12.68145 | 5  | 1 | 4 | 265626.2 | 775748.8 | 1547347  |
| 256.0848 | 22.11725 | 22.03667 | 22.14983 | 10 | 5 | 5 | 1004007  | 4085814  | 5359144  |
| 319.1059 | 21.13833 | 21.05833 | 21.17    | 7  | 2 | 5 | 248749.2 | 876822.2 | 1087616  |
| 233.2114 | 24.92267 | 24.87683 | 24.94967 | 10 | 5 | 5 | 488268.6 | 1769223  | 2151671  |
| 324.97   | 16.957   | 16.84733 | 16.98783 | 7  | 5 | 1 | 201806.9 | 390050.6 | 207055.5 |
| 532.1972 | 21.2755  | 21.22133 | 21.32917 | 5  | 2 | 3 | 42050.73 | 96613.27 | 112559.2 |
| 300.1103 | 22.13317 | 22.06867 | 22.15117 | 6  | 2 | 4 | 139027.7 | 530072.7 | 660877.4 |
| 1179.538 | 10.67828 | 10.64782 | 10.74052 | 3  | 0 | 3 | 442368.9 | 732152   | 1087890  |
| 295.1545 | 19.54033 | 19.52933 | 19.5465  | 5  | 4 | 1 | 172236.9 | 856929.1 | 770107.8 |

|          |          |          |          |    |   |   |          |          |          |
|----------|----------|----------|----------|----|---|---|----------|----------|----------|
| 412.1577 | 20.985   | 20.94567 | 21.32917 | 10 | 4 | 5 | 2907602  | 18978786 | 24905909 |
| 621.4607 | 11.06503 | 10.95727 | 11.0843  | 7  | 3 | 4 | 102270.2 | 159024.9 | 202152.4 |
| 541.175  | 25.6825  | 25.66133 | 25.69883 | 5  | 1 | 4 | 300668.5 | 473076.4 | 1022105  |
| 222.075  | 28.16133 | 28.05933 | 28.176   | 7  | 3 | 4 | 129324   | 388192.4 | 372224.6 |
| 273.1154 | 22.12717 | 22.11583 | 22.14983 | 5  | 2 | 3 | 127417.1 | 430841.5 | 523009   |
| 396.1083 | 22.98233 | 22.943   | 23.01883 | 10 | 5 | 5 | 12642668 | 55854600 | 61326330 |
| 244.2063 | 12.60474 | 12.5681  | 12.73457 | 8  | 4 | 4 | 504933   | 1242555  | 1906195  |
| 415.6898 | 32.12658 | 32.11483 | 32.16417 | 6  | 1 | 5 | 627995.7 | 1105867  | 2424660  |
| 348.8823 | 9.537367 | 9.47815  | 9.560017 | 5  | 2 | 3 | 6807139  | 9331899  | 15542938 |
| 583.2573 | 29.09583 | 29.08283 | 29.16983 | 3  | 3 | 0 | 1108293  | 1546001  | 3134005  |
| 384.1516 | 23.28142 | 23.25383 | 23.31433 | 6  | 2 | 4 | 53951.1  | 174389.4 | 195524.1 |
| 422.3479 | 19.03317 | 19.01383 | 19.10083 | 4  | 1 | 3 | 62105.71 | 118935   | 85964.88 |
| 571.2708 | 10.53752 | 10.52038 | 10.65043 | 6  | 2 | 3 | 2787133  | 2376548  | 4323234  |
| 683.5258 | 9.591083 | 9.48745  | 9.9111   | 5  | 1 | 3 | 9246927  | 10884639 | 11379665 |
| 179.9938 | 17.735   | 17.54583 | 17.75183 | 8  | 4 | 4 | 132261.3 | 868798   | 957249   |
| 838.625  | 32.79425 | 32.741   | 32.84617 | 10 | 5 | 5 | 123242.4 | 284918.7 | 290338.8 |
| 223.0055 | 12.7426  | 12.5098  | 12.84028 | 5  | 1 | 3 | 94688.79 | 270885.3 | 353223.2 |
| 356.0069 | 22.99917 | 22.97417 | 23.01883 | 5  | 2 | 3 | 74238.35 | 189705.2 | 260325   |
| 597.3854 | 10.08485 | 10.02378 | 10.1429  | 4  | 3 | 1 | 123274.3 | 116502.7 | 80918.57 |
| 504.17   | 10.67897 | 10.63273 | 10.75237 | 9  | 4 | 5 | 45635312 | 1.56E+08 | 2.9E+08  |
| 435.2495 | 26.4285  | 26.40217 | 26.5035  | 5  | 2 | 3 | 78323.55 | 190176   | 212610.3 |
| 415.2464 | 19.81933 | 19.802   | 19.939   | 7  | 3 | 4 | 186117.5 | 651992.5 | 478602.4 |
| 229.1438 | 14.49297 | 14.39572 | 14.5705  | 7  | 2 | 5 | 302494   | 2826066  | 2716332  |
| 214.2534 | 22.12983 | 22.03667 | 22.17    | 9  | 4 | 5 | 271494.1 | 982389.6 | 1003542  |
| 298.2746 | 24.5265  | 24.45033 | 24.59417 | 7  | 3 | 4 | 104670.3 | 364386.9 | 432360.7 |
| 522.3469 | 29.1325  | 29.09717 | 29.22633 | 10 | 5 | 5 | 968979.8 | 3494062  | 3538738  |
| 729.458  | 40.65875 | 40.61117 | 40.681   | 8  | 5 | 3 | 78773.71 | 541239.2 | 209412.1 |
| 381.1478 | 26.22483 | 26.16633 | 26.238   | 7  | 2 | 5 | 171006.7 | 940565.6 | 1255054  |
| 759.0533 | 18.10458 | 18.10333 | 18.155   | 4  | 1 | 3 | 238039.1 | 653696.9 | 1169532  |
| 315.1789 | 10.41245 | 10.27417 | 10.65043 | 6  | 4 | 1 | 1578711  | 5505159  | 8432031  |
| 292.2568 | 28.42583 | 28.3955  | 28.45267 | 10 | 5 | 5 | 1040214  | 5161076  | 5879507  |
| 348.1218 | 31.63183 | 31.61217 | 31.67417 | 4  | 3 | 1 | 64116.54 | 154916.3 | 197680.4 |
| 265.084  | 13.6958  | 13.60817 | 13.73812 | 4  | 1 | 3 | 74092.71 | 399699.1 | 673964.3 |
| 453.1844 | 20.64342 | 20.58967 | 20.7355  | 10 | 5 | 5 | 7742535  | 35240521 | 46066162 |
| 906.6859 | 9.899992 | 9.817433 | 10.049   | 8  | 2 | 4 | 2927112  | 4954320  | 6556675  |
| 398.4064 | 22.98917 | 22.943   | 23.01033 | 5  | 2 | 3 | 47432.77 | 134090.8 | 214066.7 |
| 316.3216 | 27.02833 | 27.01267 | 27.05417 | 6  | 3 | 3 | 837314.6 | 2506517  | 3154728  |
| 286.0942 | 18.11767 | 18.07617 | 18.18483 | 5  | 2 | 3 | 190880.8 | 626059.1 | 823340.8 |
| 752.2183 | 29.12583 | 29.096   | 29.18217 | 5  | 3 | 2 | 149582.7 | 239177.6 | 180349.8 |
| 467.1999 | 26.98317 | 26.95617 | 27.01333 | 6  | 2 | 4 | 149572.8 | 555056.9 | 694674   |
| 761.5466 | 34.39317 | 34.35167 | 34.401   | 10 | 5 | 5 | 1676809  | 7938163  | 9782803  |
| 655.4422 | 10.0024  | 9.960633 | 10.03782 | 5  | 2 | 3 | 374760.7 | 630743   | 1018055  |
| 700.428  | 23.82317 | 23.7885  | 23.84167 | 6  | 2 | 4 | 36475.41 | 138376.5 | 90257    |
| 1069.492 | 28.77508 | 28.70233 | 28.78    | 6  | 3 | 3 | 82291.08 | 276335   | 329192.6 |
| 381.2025 | 23.78558 | 23.66983 | 23.8115  | 10 | 5 | 5 | 956807.7 | 2471021  | 4009072  |
| 506.3253 | 27.02783 | 27       | 27.08717 | 8  | 4 | 4 | 70124.36 | 414880.3 | 325253.4 |
| 993.4725 | 10.6858  | 10.66922 | 10.69392 | 4  | 1 | 3 | 336830.5 | 495246.7 | 1012193  |

|          |          |          |          |    |   |   |          |          |          |
|----------|----------|----------|----------|----|---|---|----------|----------|----------|
| 423.2466 | 10.41848 | 10.34782 | 10.45412 | 9  | 4 | 5 | 2.48E+08 | 9.94E+08 | 1.27E+09 |
| 440.219  | 30.84933 | 30.83167 | 30.8645  | 5  | 1 | 4 | 143704.9 | 283291.7 | 385137   |
| 199.1697 | 20.42825 | 20.3965  | 20.56367 | 8  | 4 | 4 | 688177.1 | 4961397  | 1641308  |
| 254.6275 | 10.02141 | 9.9637   | 10.03463 | 4  | 1 | 3 | 261661.5 | 548834.3 | 786128.2 |
| 807.5783 | 34.228   | 34.21783 | 34.2455  | 5  | 2 | 3 | 52078.29 | 110532   | 189559.4 |
| 332.1864 | 16.28672 | 16.24337 | 16.32    | 4  | 3 | 1 | 34113.27 | 186333.3 | 77993.99 |
| 628.464  | 34.97842 | 34.92267 | 35.009   | 10 | 5 | 5 | 5028156  | 26371002 | 31465717 |
| 454.2918 | 23.7825  | 23.66983 | 23.8115  | 10 | 5 | 5 | 3987138  | 11791705 | 17833845 |
| 429.0497 | 28.96367 | 28.908   | 28.98767 | 4  | 1 | 3 | 47992.41 | 56188.11 | 113974.7 |
| 355.2891 | 22.36908 | 22.29433 | 22.38517 | 10 | 5 | 5 | 1820470  | 7515761  | 8452231  |
| 716.5168 | 34.57133 | 34.535   | 34.58683 | 10 | 5 | 5 | 5215443  | 27029980 | 32449989 |
| 712.902  | 19.69233 | 19.67567 | 19.7165  | 4  | 1 | 3 | 64254.73 | 110623.2 | 226222.6 |
| 673.2487 | 27.72633 | 27.71967 | 27.74633 | 6  | 3 | 3 | 89790.35 | 551659.1 | 609713.4 |
| 639.3128 | 41.19333 | 41.178   | 41.23617 | 10 | 5 | 5 | 297718.5 | 1620596  | 1143839  |
| 488.1556 | 26.65017 | 26.63917 | 26.69383 | 5  | 2 | 3 | 42826.95 | 81964.85 | 105140.5 |
| 360.3308 | 22.38925 | 22.327   | 22.4055  | 6  | 2 | 4 | 63707.4  | 195265.1 | 188708   |
| 543.3949 | 26.65383 | 26.63517 | 26.66483 | 5  | 2 | 3 | 56496.2  | 158005.2 | 198472.5 |
| 233.1751 | 17.03717 | 16.97933 | 17.06667 | 10 | 5 | 5 | 224654.4 | 1344402  | 838084.6 |
| 224.2124 | 23.046   | 22.97417 | 23.07817 | 10 | 5 | 5 | 714823.2 | 3217914  | 3548658  |
| 581.1987 | 25.67708 | 25.63383 | 25.69883 | 6  | 1 | 5 | 520381.7 | 891189.9 | 1977478  |
| 752.4434 | 41.208   | 41.11967 | 41.23617 | 7  | 3 | 4 | 101995.6 | 361159.3 | 177623.3 |
| 161.0809 | 32.50483 | 32.37967 | 32.54    | 10 | 5 | 5 | 950828.9 | 5073066  | 5314778  |
| 424.3455 | 10.23778 | 9.946617 | 10.25657 | 8  | 3 | 5 | 1409688  | 968517.5 | 1155891  |
| 187.1118 | 35.58967 | 35.53    | 35.65117 | 3  | 0 | 3 | 40870.07 | 362161.3 | 57191.29 |
| 644.2658 | 28.498   | 28.492   | 28.568   | 5  | 2 | 3 | 101474   | 343604.4 | 343498.6 |
| 366.148  | 15.59958 | 15.57163 | 15.65882 | 4  | 1 | 3 | 73662.09 | 312092   | 424467.4 |
| 241.2721 | 32.79183 | 32.741   | 32.835   | 7  | 3 | 4 | 46676.54 | 184773.3 | 115631.8 |
| 576.3905 | 24.74217 | 24.73033 | 24.79483 | 9  | 4 | 5 | 159974.5 | 448931.1 | 623905   |
| 245.1303 | 9.2076   | 9.178    | 9.2529   | 5  | 3 | 2 | 7537442  | 14634977 | 20682043 |
| 381.2989 | 25.801   | 25.76133 | 25.82183 | 7  | 3 | 4 | 111994.8 | 320253.2 | 386799.6 |
| 518.3196 | 36.595   | 36.535   | 36.71167 | 5  | 3 | 2 | 29717.09 | 148572.2 | 70264.88 |
| 595.3754 | 22.77183 | 22.71633 | 22.7825  | 5  | 2 | 3 | 99583.22 | 209469.6 | 354317.4 |
| 311.0908 | 11.05192 | 10.97798 | 11.1665  | 3  | 0 | 3 | 119257   | 482246.1 | 419719.5 |
| 672.4902 | 34.7655  | 34.72133 | 34.786   | 10 | 5 | 5 | 6027859  | 30442513 | 36328318 |
| 276.1026 | 18.09833 | 18.04133 | 18.1585  | 4  | 3 | 1 | 94201.13 | 228761.7 | 240886   |
| 298.1148 | 22.12617 | 22.05267 | 22.15067 | 8  | 3 | 5 | 368700.8 | 1636678  | 2092346  |
| 525.8381 | 32.11683 | 32.05683 | 32.19283 | 10 | 5 | 5 | 232528   | 1292855  | 1403344  |
| 463.3616 | 20.84367 | 20.82067 | 20.86083 | 10 | 5 | 5 | 1471289  | 4986990  | 6141414  |
| 228.1598 | 9.186383 | 9.08515  | 9.243133 | 5  | 3 | 2 | 1573944  | 5457661  | 3393743  |
| 283.0956 | 15.87101 | 15.81567 | 15.90692 | 8  | 3 | 5 | 300591.9 | 1738681  | 2120789  |
| 568.3194 | 29.13283 | 29.04817 | 29.21517 | 4  | 3 | 0 | 37330252 | 52129954 | 71983520 |
| 434.2089 | 17.29183 | 17.22267 | 17.30967 | 5  | 2 | 3 | 62749.23 | 204020.7 | 106886.2 |
| 314.342  | 37.63942 | 37.6125  | 37.71217 | 6  | 4 | 2 | 20361.05 | 149498   | 40301.03 |
| 371.2173 | 9.532875 | 9.473767 | 9.584433 | 8  | 5 | 3 | 19308994 | 65287745 | 39950857 |
| 383.3718 | 36.93217 | 36.91383 | 37.065   | 5  | 3 | 2 | 31776.65 | 71883.56 | 61022.38 |
| 381.2517 | 20.69375 | 20.65667 | 20.7355  | 4  | 1 | 3 | 78103.05 | 191024.3 | 235675.8 |
| 373.2378 | 41.76    | 41.686   | 41.777   | 9  | 4 | 5 | 32236.8  | 302335.8 | 44445.8  |

|          |          |          |          |    |   |   |          |          |          |
|----------|----------|----------|----------|----|---|---|----------|----------|----------|
| 360.1323 | 21.14133 | 21.13467 | 21.17    | 5  | 3 | 2 | 96527.73 | 232462.8 | 310694.3 |
| 483.3914 | 18.42267 | 18.374   | 18.47633 | 9  | 4 | 5 | 158369.3 | 583302.8 | 621558.8 |
| 442.3444 | 10.79546 | 10.7246  | 10.82042 | 8  | 4 | 4 | 764975   | 1236032  | 2003852  |
| 702.1786 | 22.13133 | 22.05267 | 22.1365  | 6  | 2 | 4 | 427415.8 | 748571.3 | 1146524  |
| 264.1048 | 19.55083 | 19.51717 | 19.58533 | 4  | 1 | 3 | 91055.75 | 340540.4 | 482925.7 |
| 498.3795 | 30.63583 | 30.63167 | 30.7045  | 4  | 3 | 1 | 112391.6 | 493164.9 | 412705   |
| 299.1186 | 18.12058 | 18.03217 | 18.1595  | 10 | 5 | 5 | 1342007  | 3996512  | 4462836  |
| 293.6454 | 22.13158 | 22.03667 | 22.14983 | 6  | 2 | 4 | 56994.73 | 205485.7 | 293693.7 |
| 321.1013 | 21.13092 | 21.07017 | 21.17    | 6  | 2 | 4 | 104715.2 | 270216.8 | 354828.7 |
| 336.23   | 9.199533 | 9.101033 | 9.515567 | 9  | 5 | 3 | 14940275 | 37583774 | 28151554 |
| 829.6105 | 43.0995  | 43.02783 | 43.10017 | 3  | 0 | 3 | 15203.76 | 44542.96 | 18185.23 |
| 299.3506 | 30.7775  | 30.7485  | 30.874   | 7  | 4 | 3 | 249997.8 | 381935.7 | 349021.7 |
| 269.2479 | 31.138   | 31.03117 | 31.15433 | 4  | 1 | 3 | 219920.1 | 2323504  | 1623081  |
| 723.5898 | 31.12525 | 31.08133 | 31.172   | 10 | 5 | 5 | 3108831  | 8998554  | 8511891  |
| 328.082  | 27.18292 | 27.11533 | 27.22933 | 8  | 3 | 5 | 92562.55 | 375775.5 | 373502.9 |
| 435.3345 | 9.187083 | 9.101033 | 9.280533 | 7  | 5 | 2 | 1.49E+08 | 3.85E+08 | 2.74E+08 |
| 677.9472 | 18.1235  | 18.00283 | 18.19983 | 5  | 1 | 4 | 74526.96 | 163577.2 | 255131.1 |
| 571.8018 | 29.19917 | 29.16983 | 29.29983 | 7  | 3 | 4 | 878429   | 2866386  | 3860513  |
| 356.293  | 22.35883 | 22.27817 | 22.3935  | 6  | 3 | 3 | 74814.59 | 177073.5 | 194616.3 |
| 528.1571 | 26.91183 | 26.84583 | 26.94067 | 6  | 3 | 3 | 100128.9 | 372153.8 | 458761.8 |
| 398.306  | 27.22325 | 27.1775  | 27.25833 | 8  | 4 | 4 | 243390.5 | 838705.8 | 923864.2 |
| 525.3648 | 32.117   | 32.08783 | 32.19133 | 7  | 4 | 3 | 294093.6 | 1191958  | 1404618  |
| 540.1718 | 25.67708 | 25.64683 | 25.69883 | 6  | 1 | 5 | 1408177  | 2421366  | 5303446  |
| 275.2566 | 19.45233 | 19.44267 | 19.48333 | 3  | 0 | 3 | 23658.41 | 38266.01 | 42031.69 |
| 586.7619 | 29.21267 | 29.18433 | 29.24117 | 5  | 1 | 4 | 165567.4 | 340106.3 | 564949   |
| 200.1727 | 33.48075 | 33.40883 | 33.5045  | 8  | 4 | 4 | 326845.8 | 1779699  | 1620427  |
| 377.1966 | 24.97383 | 24.93717 | 25.02533 | 10 | 5 | 5 | 251140.6 | 933176.7 | 1219281  |
| 502.4053 | 19.74658 | 19.7225  | 19.887   | 10 | 5 | 5 | 1278260  | 5116959  | 5734844  |
| 752.6242 | 34.82767 | 34.82217 | 34.88117 | 7  | 4 | 3 | 685893.3 | 2358302  | 1197020  |
| 333.3348 | 32.7825  | 32.741   | 32.835   | 10 | 5 | 5 | 1366301  | 9191383  | 5084975  |
| 632.1727 | 9.529058 | 9.474117 | 9.545617 | 4  | 1 | 3 | 1648478  | 2213059  | 4601155  |
| 482.0566 | 24.34375 | 24.267   | 24.35767 | 6  | 2 | 4 | 79590.11 | 241433   | 365101.2 |
| 641.4628 | 17.20567 | 17.18383 | 17.2395  | 10 | 5 | 5 | 578843.4 | 2691357  | 2338369  |
| 288.2902 | 21.96133 | 21.87817 | 21.99517 | 10 | 5 | 5 | 1936710  | 7502269  | 8140715  |
| 382.3435 | 10.05089 | 10.02378 | 10.12338 | 8  | 5 | 3 | 508257.4 | 1075269  | 1843511  |
| 554.3136 | 19.795   | 19.745   | 19.90433 | 4  | 1 | 3 | 110176   | 171303.8 | 188157.8 |
| 247.1785 | 15.62142 | 15.57163 | 15.66007 | 7  | 3 | 4 | 109780.2 | 645870   | 785999.3 |
| 379.3059 | 28.70025 | 28.67617 | 28.70567 | 10 | 5 | 5 | 2811520  | 15326154 | 17107715 |
| 427.1871 | 16.638   | 16.59617 | 16.67783 | 9  | 4 | 5 | 166517.7 | 637909.2 | 689891   |
| 295.1958 | 8.917533 | 8.7127   | 8.989483 | 9  | 5 | 4 | 1022326  | 2330023  | 1909175  |
| 753.3919 | 10.66922 | 10.62815 | 10.77118 | 7  | 3 | 4 | 10898045 | 16409516 | 34244420 |
| 564.3598 | 9.1345   | 9.020933 | 9.184033 | 8  | 5 | 3 | 4973090  | 8224873  | 6557631  |
| 401.1161 | 10.33661 | 10.30387 | 10.42227 | 4  | 1 | 3 | 956570.8 | 1766528  | 2004409  |
| 554.007  | 19.3495  | 19.32383 | 19.40817 | 5  | 2 | 3 | 73250.45 | 137189.8 | 237111.9 |
| 299.1835 | 17.67367 | 17.63367 | 17.7365  | 9  | 5 | 4 | 90356.48 | 390078.4 | 341040.3 |
| 493.1776 | 10.68373 | 10.62147 | 10.806   | 5  | 4 | 1 | 213981.9 | 346933.1 | 248819.2 |
| 571.35   | 29.14033 | 29.09583 | 29.16983 | 7  | 4 | 3 | 526645   | 536145.1 | 475956.4 |

|          |          |          |          |    |   |   |          |          |          |
|----------|----------|----------|----------|----|---|---|----------|----------|----------|
| 299.2014 | 29.55367 | 29.50583 | 29.56833 | 3  | 0 | 3 | 1910557  | 6888074  | 7216414  |
| 590.8086 | 10.60763 | 10.56983 | 10.77118 | 7  | 2 | 4 | 1270804  | 1137822  | 1997281  |
| 299.107  | 22.12467 | 22.05267 | 22.14983 | 10 | 5 | 5 | 1376647  | 6293951  | 8122727  |
| 752.3895 | 10.67897 | 10.599   | 10.77118 | 7  | 3 | 4 | 20265508 | 29931454 | 62792710 |
| 369.1255 | 34.03325 | 33.989   | 34.083   | 8  | 3 | 5 | 444232.7 | 1828074  | 2456371  |
| 365.3895 | 39.83133 | 39.729   | 39.9665  | 7  | 3 | 4 | 33195.93 | 105994.4 | 95469.85 |
| 717.5201 | 34.57133 | 34.52267 | 34.58683 | 10 | 5 | 5 | 2066831  | 9928949  | 12236980 |
| 456.3532 | 9.210858 | 9.101033 | 9.266617 | 8  | 4 | 4 | 9033667  | 18869342 | 13673390 |
| 361.2742 | 28.3815  | 28.32717 | 28.47817 | 9  | 5 | 4 | 342434.4 | 1248075  | 1477657  |
| 316.1995 | 26.64758 | 26.61617 | 26.68133 | 10 | 5 | 5 | 770940.6 | 3016785  | 3417663  |
| 701.4959 | 9.525517 | 9.463983 | 9.596683 | 8  | 5 | 3 | 2.05E+09 | 6.3E+09  | 9.59E+09 |
| 548.3714 | 33.42067 | 33.32533 | 33.79317 | 9  | 4 | 4 | 541244.8 | 2756825  | 2847283  |
| 311.7182 | 23.50233 | 23.42917 | 23.58517 | 10 | 5 | 5 | 182352.8 | 1111162  | 1236739  |
| 419.2797 | 24.90892 | 24.87683 | 24.94967 | 10 | 5 | 5 | 473927.7 | 1708353  | 2048467  |
| 548.2442 | 27.76017 | 27.731   | 27.84883 | 7  | 2 | 5 | 1037833  | 4852780  | 6125467  |
| 417.1366 | 20.9615  | 20.93383 | 21.03417 | 10 | 5 | 5 | 3674343  | 25830311 | 34095937 |
| 619.2595 | 10.65813 | 10.56337 | 10.73325 | 6  | 2 | 4 | 503241.9 | 805674.5 | 1607946  |
| 165.0913 | 25.79883 | 25.71833 | 25.83717 | 7  | 4 | 3 | 467235.4 | 2153148  | 1713000  |
| 601.0371 | 18.141   | 18.05717 | 18.16983 | 4  | 1 | 3 | 68747    | 180383.2 | 255729.8 |
| 496.3403 | 30.0245  | 30.00317 | 30.1315  | 10 | 5 | 5 | 10375080 | 73908189 | 40272724 |
| 327.0089 | 20.09758 | 20.04883 | 20.23717 | 8  | 4 | 4 | 242441.9 | 1752053  | 1313730  |
| 202.1802 | 8.690483 | 8.51555  | 8.69725  | 3  | 3 | 0 | 4230425  | 39080657 | 34930375 |
| 347.2212 | 20.74483 | 20.72933 | 20.84833 | 5  | 2 | 3 | 69825312 | 66328131 | 1.34E+08 |
| 375.2108 | 16.968   | 16.937   | 16.99633 | 10 | 5 | 5 | 307307.5 | 1125877  | 1292188  |
| 567.9104 | 31.31508 | 31.16467 | 31.33367 | 4  | 3 | 0 | 92627.73 | 449165.1 | 281924.5 |
| 643.4637 | 28.80858 | 28.78783 | 28.83383 | 8  | 3 | 5 | 87367.09 | 316660   | 387407.1 |
| 454.023  | 13.89312 | 13.8347  | 13.94133 | 6  | 1 | 5 | 148678.5 | 570057.2 | 1018253  |
| 418.2434 | 43.69433 | 43.51133 | 43.80233 | 5  | 3 | 0 | 69037.09 | 630993.8 | 224718.2 |
| 291.2361 | 32.5135  | 32.37967 | 32.53617 | 5  | 3 | 2 | 171372.9 | 619698.4 | 728571.8 |
| 360.2567 | 9.197192 | 9.116917 | 9.266783 | 6  | 4 | 2 | 3673167  | 6229264  | 9070584  |
| 415.2119 | 23.86883 | 23.77933 | 23.9     | 8  | 4 | 4 | 1249443  | 6046128  | 5731853  |
| 396.2513 | 24.97383 | 24.91317 | 24.98317 | 7  | 4 | 3 | 218022.3 | 501431.6 | 774898.2 |
| 464.3649 | 20.84617 | 20.80517 | 20.86083 | 9  | 4 | 5 | 152437.7 | 460414.4 | 580797.3 |
| 213.0577 | 22.13033 | 22.06867 | 22.15067 | 7  | 3 | 4 | 216746.8 | 660405.5 | 746103.4 |
| 380.1985 | 36.58258 | 36.57717 | 36.64183 | 4  | 3 | 1 | 124570.3 | 471754.6 | 499987.7 |
| 300.29   | 35.16125 | 35.147   | 35.19067 | 6  | 3 | 3 | 133945.3 | 654578.3 | 428441.7 |
| 253.6372 | 9.196992 | 9.116917 | 9.257833 | 8  | 5 | 3 | 3849627  | 7879525  | 10558335 |
| 380.2438 | 23.15033 | 23.13033 | 23.1515  | 4  | 0 | 4 | 82114.14 | 526734.4 | 288588.3 |
| 500.0488 | 13.73298 | 13.6964  | 13.76748 | 4  | 1 | 3 | 47058.1  | 144783   | 247958.9 |
| 198.1855 | 13.02208 | 12.97645 | 13.06513 | 7  | 3 | 4 | 205994   | 448278.2 | 469900.4 |
| 1068.489 | 28.78417 | 28.7325  | 28.816   | 9  | 5 | 4 | 144005.7 | 595529.1 | 633265.1 |
| 389.1417 | 21.00667 | 20.96383 | 21.0485  | 7  | 4 | 3 | 496533.2 | 2633691  | 3511058  |
| 255.6372 | 9.217975 | 9.15355  | 9.278583 | 8  | 4 | 4 | 8147538  | 13137490 | 19554519 |
| 655.3083 | 41.1335  | 41.1185  | 41.33767 | 5  | 2 | 3 | 3849134  | 13991373 | 13126152 |
| 299.2012 | 21.03583 | 20.9615  | 21.0915  | 9  | 4 | 5 | 992722.5 | 5049211  | 5092099  |
| 468.3616 | 28.79333 | 28.77483 | 28.8625  | 9  | 4 | 5 | 319261.7 | 1379918  | 1633734  |
| 573.5303 | 30.24875 | 30.23533 | 30.34733 | 6  | 3 | 3 | 30087.74 | 112267.8 | 122453.9 |

|          |          |          |          |    |   |   |          |          |          |
|----------|----------|----------|----------|----|---|---|----------|----------|----------|
| 278.1909 | 11.7002  | 11.6697  | 11.89242 | 7  | 2 | 5 | 147873   | 524456.6 | 485552.8 |
| 410.1238 | 27.79158 | 27.73433 | 27.83883 | 8  | 4 | 4 | 129004   | 631460.9 | 650718.6 |
| 453.3747 | 9.14945  | 8.98005  | 9.584867 | 7  | 3 | 2 | 77027776 | 46007186 | 39303209 |
| 317.1154 | 30.84833 | 30.74683 | 30.88867 | 10 | 5 | 5 | 1264917  | 7901293  | 5834697  |
| 349.1217 | 19.5465  | 19.50067 | 19.64533 | 7  | 2 | 5 | 104104.8 | 339341.9 | 498514.8 |
| 422.2905 | 39.53083 | 39.471   | 39.59083 | 4  | 1 | 3 | 57140.27 | 403829.5 | 139633.7 |
| 524.3621 | 32.10967 | 32.07183 | 32.20817 | 10 | 5 | 5 | 3106364  | 17231546 | 18318927 |
| 621.275  | 32.10267 | 31.942   | 32.26833 | 9  | 3 | 4 | 184909   | 1014774  | 1103447  |
| 338.1084 | 23.56967 | 23.4875  | 23.58417 | 5  | 3 | 2 | 82729.63 | 196175.9 | 274475.7 |
| 396.3265 | 30.34833 | 30.33317 | 30.3545  | 4  | 1 | 3 | 41745.45 | 119321.1 | 94700.1  |
| 229.2164 | 28.76475 | 28.69817 | 28.78033 | 8  | 4 | 4 | 131963.8 | 697791.5 | 756335.2 |
| 278.2693 | 31.52108 | 31.49917 | 31.58767 | 8  | 4 | 4 | 381162.3 | 1666642  | 1820632  |
| 541.2625 | 7.235117 | 7.161867 | 7.244283 | 5  | 2 | 3 | 387739.4 | 487989.2 | 860980.7 |
| 357.2904 | 18.95217 | 18.9245  | 19.02667 | 5  | 2 | 3 | 50377.09 | 128148.4 | 111381.3 |
| 476.2552 | 19.9865  | 19.985   | 20.10783 | 3  | 0 | 3 | 146308.4 | 524633.6 | 534226.7 |
| 701.1758 | 22.13133 | 22.03667 | 22.1365  | 6  | 2 | 4 | 1122086  | 2400229  | 3794878  |
| 748.5338 | 31.94217 | 31.92633 | 31.9665  | 6  | 3 | 3 | 96860.98 | 413525.5 | 515529.1 |
| 573.4171 | 43.58733 | 43.527   | 43.63283 | 3  | 3 | 0 | 62985.41 | 225663.4 | 58140.26 |
| 827.3597 | 10.67897 | 10.63273 | 10.77118 | 7  | 3 | 4 | 2746051  | 6182306  | 11935919 |
| 542.6686 | 30.84733 | 30.806   | 30.95983 | 5  | 3 | 2 | 30329.85 | 100108.6 | 119617.4 |
| 396.2901 | 32.37983 | 32.31667 | 32.408   | 10 | 5 | 5 | 1481691  | 6223031  | 8081367  |
| 357.0102 | 16.95158 | 16.9075  | 16.96683 | 6  | 3 | 3 | 66576.31 | 171576.9 | 209326.6 |
| 826.3586 | 10.67863 | 10.58428 | 10.75237 | 8  | 4 | 4 | 12230486 | 26718464 | 54103658 |
| 291.2536 | 19.47867 | 19.4575  | 19.5185  | 8  | 3 | 5 | 99544.52 | 501558.3 | 421013.7 |
| 241.056  | 19.6185  | 19.58717 | 19.64167 | 9  | 4 | 5 | 208114.6 | 886167.1 | 910359.4 |
| 425.2877 | 39.74383 | 39.66433 | 39.80883 | 9  | 5 | 4 | 144056.1 | 886644.4 | 514830.6 |
| 460.3429 | 23.19433 | 23.17283 | 23.22467 | 5  | 2 | 3 | 512856   | 809418.9 | 897988   |
| 611.4074 | 11.02411 | 10.97327 | 11.08012 | 6  | 3 | 3 | 156278.6 | 446353.3 | 569597.3 |
| 293.0147 | 9.225117 | 9.065617 | 9.3075   | 5  | 1 | 3 | 6440379  | 8652645  | 14967831 |
| 399.1261 | 20.65483 | 20.605   | 20.7265  | 9  | 4 | 5 | 986068.2 | 3665196  | 4896457  |
| 157.0837 | 6.116867 | 5.9699   | 6.344883 | 4  | 3 | 1 | 744719.6 | 3767812  | 3431419  |
| 379.2963 | 22.55683 | 22.48433 | 22.57717 | 5  | 2 | 3 | 50923.49 | 140375.3 | 115164.2 |
| 463.1432 | 10.69325 | 10.54903 | 10.77118 | 9  | 3 | 5 | 12277923 | 37287696 | 67845301 |
| 246.1336 | 9.222183 | 9.160333 | 9.297233 | 5  | 2 | 3 | 3531968  | 6094922  | 3667009  |
| 285.0915 | 15.89331 | 15.85218 | 15.92058 | 8  | 3 | 5 | 91542.8  | 492506.4 | 633501.3 |
| 472.9294 | 9.1803   | 8.85025  | 9.266617 | 6  | 4 | 1 | 2026694  | 9369905  | 9534965  |
| 377.25   | 17.54567 | 17.414   | 17.55933 | 3  | 0 | 3 | 53251.84 | 151761.7 | 127522.8 |
| 312.1814 | 17.27442 | 17.2395  | 17.3235  | 8  | 4 | 4 | 128003   | 539182.8 | 606832.9 |
| 641.522  | 31.4795  | 31.43467 | 31.52733 | 5  | 3 | 2 | 50713.99 | 210017.2 | 223112.6 |
| 530.3247 | 31.88283 | 31.847   | 31.93083 | 7  | 4 | 3 | 186058.3 | 597554.7 | 776657.5 |
| 501.1118 | 18.11767 | 18.0555  | 18.1585  | 9  | 4 | 5 | 288328.9 | 1212723  | 1428798  |
| 296.5881 | 22.13133 | 22.03667 | 22.1365  | 6  | 2 | 4 | 58153.41 | 196456.3 | 285685   |
| 484.1092 | 18.13833 | 18.06983 | 18.158   | 9  | 4 | 5 | 7113638  | 26562388 | 42138335 |
| 407.7984 | 11.47543 | 11.33502 | 11.50023 | 6  | 3 | 3 | 195206.2 | 698247.7 | 868657.8 |
| 331.0027 | 20.08267 | 20.06317 | 20.11383 | 5  | 2 | 3 | 70065.83 | 372086.6 | 257672.7 |
| 393.9932 | 15.88558 | 15.82215 | 15.90692 | 4  | 1 | 3 | 82095.25 | 375632   | 443042.2 |
| 594.3764 | 33.71317 | 33.64183 | 33.7715  | 3  | 3 | 0 | 34159.21 | 142040.9 | 136201.9 |

|          |          |          |          |    |   |   |          |          |          |
|----------|----------|----------|----------|----|---|---|----------|----------|----------|
| 366.8447 | 9.504625 | 9.460417 | 9.537367 | 4  | 1 | 3 | 9569030  | 9675892  | 15433824 |
| 265.1915 | 14.84613 | 14.79143 | 14.90665 | 8  | 3 | 5 | 49753.39 | 211160.7 | 250528   |
| 384.3143 | 10.09275 | 10.03412 | 10.1147  | 6  | 3 | 3 | 318447.7 | 335251.7 | 587924.3 |
| 347.2567 | 21.88367 | 21.87383 | 21.889   | 5  | 3 | 2 | 456041.3 | 2267996  | 2408163  |
| 510.3197 | 19.99158 | 19.9375  | 20.15683 | 8  | 4 | 4 | 168465.5 | 789796.8 | 676603.8 |
| 350.2176 | 43.03133 | 42.66967 | 43.0855  | 7  | 1 | 3 | 42618.79 | 461821.6 | 103069.2 |
| 399.3586 | 27.29892 | 27.25033 | 27.34783 | 10 | 5 | 5 | 3411088  | 14638017 | 15989593 |
| 314.1058 | 25.68575 | 25.63383 | 25.71367 | 6  | 1 | 5 | 100750.2 | 252913.1 | 306051.3 |
| 332.3165 | 27.64408 | 27.594   | 27.67517 | 8  | 4 | 4 | 1269660  | 3490778  | 5223154  |
| 525.1358 | 18.128   | 18.06983 | 18.1585  | 8  | 3 | 5 | 1799054  | 6268969  | 10137889 |
| 431.3751 | 24.61133 | 24.57617 | 24.63383 | 10 | 5 | 5 | 2298208  | 11362758 | 13098472 |
| 224.2379 | 16.49343 | 16.46872 | 16.53408 | 4  | 1 | 3 | 26310.89 | 39095.05 | 48767.55 |
| 238.1607 | 9.181633 | 9.101033 | 9.2529   | 6  | 3 | 3 | 2491263  | 7700913  | 10366841 |
| 377.2902 | 32.2765  | 32.23883 | 32.31033 | 8  | 3 | 5 | 125013.5 | 484255.4 | 543763.8 |
| 715.511  | 9.791017 | 9.7455   | 9.808167 | 7  | 4 | 3 | 837795.5 | 1670981  | 2627320  |
| 439.7171 | 30.85667 | 30.83133 | 30.8645  | 6  | 2 | 4 | 241973.7 | 404294.7 | 836976.2 |
| 392.3164 | 37.00658 | 36.93267 | 37.02017 | 4  | 0 | 4 | 99856.42 | 919118.9 | 145603.5 |
| 341.2666 | 34.76183 | 34.73667 | 34.77183 | 7  | 3 | 4 | 189553.1 | 823673.8 | 788643.3 |
| 831.413  | 9.5169   | 9.472433 | 9.549217 | 3  | 0 | 3 | 2437549  | 3965151  | 7602468  |
| 505.1731 | 10.68777 | 10.63273 | 10.75237 | 8  | 4 | 4 | 12961649 | 42270875 | 80853325 |
| 453.3539 | 9.199792 | 8.881033 | 9.2866   | 10 | 5 | 5 | 4.59E+09 | 1.1E+10  | 8.03E+09 |
| 353.146  | 15.5205  | 15.48072 | 15.60238 | 10 | 5 | 5 | 131551.9 | 575439.2 | 387747.1 |
| 310.21   | 27.50133 | 27.38533 | 27.547   | 9  | 4 | 5 | 84636.7  | 367205.5 | 382391.1 |
| 561.3694 | 33.966   | 33.93033 | 33.995   | 9  | 5 | 4 | 405742.5 | 2434686  | 2191714  |
| 375.2155 | 22.34083 | 22.262   | 22.3935  | 5  | 2 | 3 | 53987.2  | 143015.4 | 138533.1 |
| 472.3753 | 20.18008 | 20.16367 | 20.35917 | 8  | 4 | 4 | 154561.4 | 530754.5 | 590633.9 |
| 375.7212 | 9.3198   | 9.266617 | 9.547767 | 6  | 2 | 4 | 1202434  | 1723329  | 2331770  |
| 238.0524 | 27.8655  | 27.7785  | 27.91233 | 6  | 2 | 4 | 41763.36 | 146131.7 | 184236   |
| 173.1731 | 23.49417 | 23.44383 | 23.55217 | 8  | 4 | 4 | 101971.5 | 401405.3 | 455274.9 |
| 402.0152 | 22.12592 | 22.06867 | 22.201   | 8  | 3 | 5 | 347734.1 | 2003468  | 2761529  |
| 555.0038 | 19.35933 | 19.28517 | 19.37883 | 5  | 2 | 3 | 63762    | 140490   | 209181.1 |
| 314.9375 | 23.50233 | 23.42917 | 23.6005  | 10 | 5 | 5 | 178219.3 | 1077370  | 1203122  |
| 374.0208 | 22.13633 | 22.09383 | 22.16383 | 4  | 0 | 4 | 64719.38 | 138998.5 | 193761.9 |
| 245.1945 | 13.02219 | 12.9761  | 13.12275 | 10 | 5 | 5 | 437517.6 | 1498664  | 1533807  |
| 197.1539 | 20.18342 | 20.15683 | 20.29917 | 4  | 1 | 3 | 157524.3 | 1051920  | 883899.8 |
| 752.8911 | 10.67828 | 10.62815 | 10.77118 | 7  | 3 | 4 | 18554856 | 28892055 | 60526456 |
| 259.1656 | 29.9975  | 29.93583 | 30.02217 | 3  | 0 | 3 | 191741.3 | 504150.7 | 608059.3 |
| 332.2133 | 9.871867 | 9.845267 | 9.899967 | 4  | 1 | 3 | 665112.9 | 1703443  | 2687911  |
| 598.2083 | 22.50667 | 22.4695  | 22.55683 | 6  | 3 | 3 | 48722.53 | 144867.2 | 168455.2 |
| 488.1049 | 18.12142 | 18.089   | 18.20117 | 6  | 2 | 4 | 123541   | 372103.1 | 638519   |
| 360.2743 | 23.73808 | 23.6485  | 23.83067 | 6  | 1 | 5 | 364571.5 | 2224772  | 2389140  |
| 263.6844 | 8.646958 | 8.3878   | 8.657033 | 6  | 4 | 2 | 357565.7 | 845409.7 | 1237447  |
| 378.2129 | 9.50195  | 9.44975  | 9.577667 | 5  | 2 | 3 | 4501321  | 10131397 | 16590939 |
| 308.28   | 28.42483 | 28.3955  | 28.45267 | 10 | 5 | 5 | 4310498  | 23368582 | 26425967 |
| 166.0865 | 22.52058 | 22.4575  | 22.542   | 6  | 3 | 3 | 65404.56 | 217911.4 | 235511.9 |
| 402.2073 | 22.1075  | 22.107   | 22.15117 | 3  | 0 | 3 | 80922.57 | 136824.5 | 62300.57 |
| 367.3325 | 29.7425  | 29.72533 | 29.76817 | 9  | 5 | 4 | 108717.4 | 444597.7 | 456112.6 |



|          |          |          |          |    |   |   |          |          |          |
|----------|----------|----------|----------|----|---|---|----------|----------|----------|
| 428.9233 | 22.16517 | 22.1215  | 22.1655  | 3  | 0 | 3 | 50077.66 | 98418.82 | 119943.5 |
| 280.1549 | 24.85883 | 24.8165  | 24.903   | 7  | 3 | 4 | 43058.33 | 166154.6 | 110455   |
| 814.5907 | 11.46403 | 11.35    | 11.65552 | 9  | 4 | 5 | 888704.3 | 3333005  | 4309658  |
| 648.177  | 20.42417 | 20.397   | 20.51167 | 6  | 2 | 4 | 109069.7 | 246450.8 | 387984.5 |
| 300.2046 | 20.63708 | 20.605   | 20.7355  | 10 | 5 | 5 | 990174.2 | 4957477  | 5206806  |
| 268.2637 | 25.11808 | 25.09317 | 25.13417 | 4  | 3 | 1 | 46975.29 | 224993.8 | 237389.1 |
| 415.2461 | 19.17483 | 19.168   | 19.24833 | 10 | 5 | 5 | 135069.1 | 509540.1 | 440346.4 |
| 388.5594 | 23.295   | 23.25383 | 23.31433 | 7  | 3 | 4 | 50934.57 | 170289.4 | 205585.9 |
| 451.1888 | 24.33283 | 24.28167 | 24.34483 | 5  | 2 | 3 | 69008.01 | 192577.4 | 241881.9 |
| 305.2884 | 22.76783 | 22.73733 | 22.79233 | 9  | 4 | 5 | 995404.4 | 2700074  | 3580497  |
| 559.4474 | 31.62058 | 31.59733 | 31.66967 | 8  | 3 | 5 | 187127.7 | 767033.3 | 748684.9 |
| 837.6215 | 32.79567 | 32.75733 | 32.835   | 9  | 5 | 4 | 197929.5 | 676932   | 661566.6 |
| 312.127  | 19.3515  | 19.31383 | 19.364   | 10 | 5 | 5 | 491016.1 | 1744234  | 2111937  |
| 357.3117 | 24.07917 | 23.96717 | 24.1065  | 5  | 3 | 2 | 44341.6  | 142744.3 | 160972.4 |
| 312.1307 | 25.67175 | 25.623   | 25.70383 | 8  | 3 | 5 | 139944   | 308694.5 | 453828.7 |
| 365.2336 | 10.0792  | 10.07575 | 10.10067 | 5  | 3 | 2 | 158565.5 | 291861.5 | 316138.9 |
| 599.4379 | 28.81375 | 28.78783 | 28.82533 | 8  | 3 | 5 | 189464.9 | 797745.1 | 957196.8 |
| 237.1853 | 18.866   | 18.80433 | 18.9235  | 7  | 3 | 4 | 312742.8 | 2391330  | 2368632  |
| 1082.505 | 31.89417 | 31.78233 | 31.927   | 5  | 2 | 3 | 78220.58 | 249457.8 | 323502.9 |
| 242.2846 | 13.65305 | 13.56747 | 13.69718 | 8  | 3 | 5 | 545598.3 | 2647262  | 4171372  |
| 673.4936 | 34.76325 | 34.72133 | 34.77783 | 10 | 5 | 5 | 2275381  | 10511191 | 12927074 |
| 518.9083 | 32.12117 | 32.07183 | 32.20817 | 9  | 4 | 5 | 237227   | 1288505  | 1400176  |
| 300.126  | 15.88568 | 15.84463 | 15.9229  | 4  | 1 | 3 | 96703.4  | 572605.5 | 854629.5 |
| 439.0159 | 18.14125 | 18.10333 | 18.20117 | 4  | 3 | 1 | 71360.86 | 257407   | 268506.7 |
| 401.2892 | 10.40886 | 10.32773 | 10.66397 | 8  | 3 | 4 | 4.76E+08 | 5.12E+08 | 9.19E+08 |
| 358.0024 | 16.9445  | 16.893   | 16.98333 | 8  | 3 | 5 | 122938.9 | 627993.4 | 758654.8 |
| 657.3422 | 41.19308 | 41.1635  | 41.23733 | 10 | 5 | 5 | 266498.8 | 1478755  | 1107864  |
| 269.1573 | 30.3165  | 30.24367 | 30.336   | 5  | 2 | 3 | 236546.8 | 341121   | 264427.3 |
| 226.1806 | 13.01485 | 12.9761  | 13.12275 | 10 | 5 | 5 | 2264658  | 8953255  | 9138493  |
| 280.2639 | 31.3345  | 31.27067 | 31.34333 | 5  | 3 | 2 | 80736.05 | 330194.6 | 345224.4 |
| 482.3772 | 31.73917 | 31.71233 | 31.75367 | 3  | 0 | 3 | 59858.79 | 98096.16 | 58489.63 |
| 236.1249 | 9.21955  | 9.163733 | 9.3063   | 7  | 4 | 3 | 7055262  | 11862644 | 18770856 |
| 569.4073 | 11.0333  | 10.9416  | 11.04118 | 8  | 4 | 4 | 1143988  | 3743240  | 4626230  |
| 314.142  | 22.107   | 22.05267 | 22.14983 | 9  | 4 | 5 | 450975.5 | 1470827  | 1995853  |
| 432.7064 | 10.70088 | 10.63273 | 10.77118 | 9  | 4 | 5 | 1032668  | 2088416  | 3807066  |
| 555.4108 | 28.80467 | 28.7685  | 28.82533 | 10 | 5 | 5 | 442314.4 | 1798045  | 2144454  |
| 485.1122 | 15.90678 | 15.80118 | 15.90992 | 3  | 0 | 3 | 41176.86 | 74761.41 | 159183.7 |
| 359.2198 | 25.76358 | 25.74717 | 25.78767 | 4  | 0 | 4 | 159706.7 | 211958.5 | 262702.8 |
| 1008.777 | 27.67475 | 27.637   | 27.73917 | 4  | 1 | 3 | 81147.52 | 441361.7 | 436866.6 |
| 443.1257 | 13.2128  | 13.13668 | 13.3172  | 7  | 3 | 4 | 105286.5 | 361458.1 | 379443.8 |
| 326.1421 | 19.3935  | 19.37867 | 19.41317 | 3  | 0 | 3 | 66975.73 | 109449.3 | 155887.9 |
| 336.283  | 28.61117 | 28.59867 | 28.61483 | 10 | 5 | 5 | 819066.4 | 3996171  | 4588317  |
| 482.1138 | 18.128   | 18.08433 | 18.158   | 8  | 3 | 5 | 835399.9 | 2673331  | 4294726  |
| 595.2681 | 30.84933 | 30.50117 | 31.06583 | 11 | 4 | 5 | 211022.9 | 1088540  | 504534.7 |
| 662.9439 | 18.14683 | 18.03217 | 18.16983 | 3  | 0 | 3 | 58787.14 | 136692.6 | 240115.7 |
| 387.2115 | 31.0515  | 31.017   | 31.08133 | 3  | 0 | 3 | 64675.83 | 160468.7 | 64755.06 |
| 792.2676 | 25.74175 | 25.71833 | 25.7875  | 8  | 4 | 4 | 168150.3 | 619461.7 | 730551.3 |

|          |          |          |          |    |   |   |          |          |          |
|----------|----------|----------|----------|----|---|---|----------|----------|----------|
| 587.0546 | 22.14317 | 22.1015  | 22.15067 | 4  | 1 | 3 | 142552.3 | 401670.1 | 660856.2 |
| 596.2445 | 26.87017 | 26.81367 | 26.919   | 9  | 4 | 5 | 606445.8 | 2233523  | 2815286  |
| 241.2165 | 25.45725 | 25.424   | 25.51083 | 6  | 3 | 3 | 377072.2 | 2980410  | 3152582  |
| 425.2529 | 10.42227 | 10.36557 | 10.45412 | 9  | 5 | 4 | 5477887  | 19868686 | 29199371 |
| 657.4451 | 34.71883 | 34.5945  | 34.747   | 7  | 3 | 4 | 89726.2  | 439320.4 | 522480   |
| 560.088  | 20.9775  | 20.87517 | 21.01983 | 5  | 2 | 3 | 162609.9 | 823336.2 | 1121800  |
| 474.1579 | 14.5373  | 14.25975 | 14.6458  | 9  | 3 | 4 | 287941.4 | 1059091  | 2051158  |
| 437.1937 | 24.56133 | 24.53833 | 24.631   | 3  | 3 | 0 | 451878.7 | 1549751  | 2027803  |
| 751.8949 | 10.69302 | 10.66553 | 10.77118 | 4  | 1 | 3 | 1062283  | 1349814  | 2689228  |
| 650.4534 | 43.16658 | 43.15433 | 43.2035  | 6  | 2 | 4 | 44750.52 | 239323   | 74554.32 |
| 264.2538 | 28.20583 | 28.185   | 28.22033 | 10 | 5 | 5 | 4575885  | 23231177 | 26062582 |
| 326.2329 | 31.30775 | 31.19267 | 31.3345  | 8  | 4 | 4 | 389970.5 | 1838466  | 1851361  |
| 393.2794 | 18.88133 | 18.879   | 19.0115  | 5  | 2 | 3 | 51179404 | 68401774 | 1.07E+08 |
| 369.3845 | 35.10183 | 35.04083 | 35.1745  | 10 | 5 | 5 | 52385.81 | 387267.4 | 109914.9 |
| 269.6148 | 10.73577 | 10.6177  | 10.75237 | 5  | 1 | 4 | 324485.3 | 706341   | 1176081  |
| 499.3587 | 33.692   | 33.58283 | 33.811   | 6  | 2 | 3 | 94715.8  | 277691.7 | 301901.8 |
| 267.1724 | 26.54708 | 26.50167 | 26.63533 | 6  | 3 | 3 | 1459260  | 7588907  | 7559916  |
| 192.1385 | 13.51873 | 13.34575 | 13.62822 | 11 | 4 | 5 | 379415.9 | 3104610  | 3376339  |
| 294.2068 | 28.14233 | 28.04433 | 28.16833 | 10 | 5 | 5 | 21724404 | 1.2E+08  | 1.26E+08 |
| 240.175  | 12.24061 | 12.19923 | 12.24983 | 4  | 1 | 3 | 50213.77 | 128771.8 | 220866.7 |
| 198.1494 | 15.54664 | 15.51557 | 15.60127 | 8  | 3 | 5 | 133998.3 | 445707.8 | 636495.8 |
| 688.5117 | 37.49233 | 37.38983 | 37.5325  | 4  | 1 | 3 | 20570.47 | 68857.62 | 16459.7  |
| 268.1781 | 24.83908 | 24.80167 | 24.8845  | 6  | 3 | 3 | 47996.79 | 148561.7 | 179173.6 |
| 414.7092 | 30.9075  | 30.90517 | 30.93717 | 6  | 2 | 4 | 1251125  | 2755649  | 5134009  |
| 451.1782 | 21.69633 | 21.67117 | 21.71283 | 5  | 1 | 4 | 80170.92 | 241123.7 | 326129.9 |
| 441.0876 | 18.11767 | 18.09117 | 18.18667 | 5  | 2 | 3 | 143379.9 | 335840.5 | 655819.4 |
| 965.4436 | 31.6215  | 31.56967 | 31.704   | 5  | 2 | 3 | 58035.37 | 147096.6 | 186150.5 |
| 308.095  | 19.5555  | 19.50067 | 19.58883 | 8  | 3 | 5 | 787083.7 | 3196781  | 4604961  |
| 227.677  | 9.173983 | 9.08515  | 9.2076   | 3  | 3 | 0 | 3793146  | 4976592  | 5145427  |
| 287.72   | 9.513933 | 9.473767 | 9.63445  | 6  | 3 | 3 | 6048924  | 13642976 | 21077946 |
| 329.3247 | 36.63425 | 36.63267 | 36.63717 | 4  | 1 | 3 | 35653.7  | 209981   | 228657.3 |
| 601.1149 | 24.33867 | 24.2525  | 24.372   | 6  | 2 | 4 | 53949.44 | 117595.7 | 166557.2 |
| 226.2168 | 24.54067 | 24.49983 | 24.57133 | 7  | 3 | 4 | 60929.66 | 228522.4 | 260198   |
| 328.2202 | 40.32683 | 40.25067 | 40.363   | 7  | 3 | 4 | 107833.6 | 506771.1 | 545179.7 |
| 267.1747 | 24.83883 | 24.8165  | 24.8845  | 9  | 4 | 5 | 340779.4 | 1350624  | 1632908  |
| 380.2437 | 29.75333 | 29.74017 | 29.8125  | 3  | 0 | 3 | 222855.3 | 1086241  | 554182.8 |
| 788.6109 | 44.95842 | 44.90333 | 44.97467 | 10 | 5 | 5 | 1309647  | 8604541  | 2041100  |
| 758.2419 | 18.11058 | 18.09117 | 18.14    | 4  | 1 | 3 | 105865.3 | 207932   | 357903.4 |
| 699.1807 | 22.11733 | 22.03667 | 22.136   | 6  | 2 | 4 | 184031   | 352202.4 | 582503.8 |
| 646.1719 | 30.41683 | 30.37583 | 30.45083 | 9  | 5 | 4 | 223370.2 | 1027392  | 1161458  |
| 463.0512 | 25.697   | 25.6755  | 25.70083 | 7  | 3 | 4 | 140498.3 | 386719.1 | 594265.2 |
| 311.9993 | 19.335   | 19.29933 | 19.364   | 5  | 2 | 3 | 96736.52 | 289692.4 | 424260.4 |
| 588.3077 | 21.07833 | 21.0115  | 21.11117 | 6  | 2 | 4 | 353002   | 583077.3 | 772192   |
| 259.1907 | 39.57967 | 39.51517 | 39.606   | 5  | 2 | 3 | 234672.3 | 929169.6 | 970232.7 |
| 484.395  | 18.4095  | 18.40333 | 18.47633 | 5  | 2 | 3 | 53096.19 | 96536.55 | 115469.9 |
| 702.0486 | 9.5169   | 9.33635  | 9.537367 | 3  | 0 | 3 | 5789342  | 3890277  | 6159200  |
| 244.1912 | 13.01485 | 12.9761  | 13.12275 | 10 | 5 | 5 | 3135695  | 14218671 | 13984231 |

|          |          |          |          |    |   |   |          |          |          |
|----------|----------|----------|----------|----|---|---|----------|----------|----------|
| 928.5876 | 43.59758 | 43.58717 | 43.61567 | 4  | 1 | 3 | 48653.81 | 129957.4 | 97768.36 |
| 569.0698 | 42.24767 | 42.21783 | 42.28867 | 5  | 2 | 3 | 32580.31 | 176705.3 | 36144.52 |
| 369.204  | 28.9115  | 28.8075  | 28.98033 | 4  | 0 | 4 | 57535.85 | 176697.6 | 59570.39 |
| 577.2847 | 10.73325 | 10.6177  | 10.75042 | 3  | 0 | 3 | 308238.5 | 456273.2 | 910828.2 |
| 1143.566 | 10.67222 | 10.66402 | 10.712   | 4  | 1 | 3 | 870970.6 | 1328366  | 2595171  |
| 406.3321 | 37.03467 | 37.0215  | 37.06767 | 3  | 0 | 3 | 41868.73 | 193695.9 | 86028.38 |
| 570.3414 | 28.1545  | 28.11533 | 28.25317 | 6  | 3 | 3 | 41936.56 | 210669.3 | 61433.68 |
| 323.2223 | 19.02592 | 19.01083 | 19.05567 | 8  | 4 | 4 | 143387.5 | 744159.6 | 567237.2 |
| 656.3391 | 41.19333 | 41.16333 | 41.23733 | 10 | 5 | 5 | 2314547  | 14010900 | 10690400 |
| 255.2111 | 33.07075 | 33.007   | 33.07733 | 4  | 3 | 1 | 63798.68 | 466365.4 | 260208.7 |
| 372.2494 | 8.905617 | 8.7127   | 8.955867 | 4  | 3 | 1 | 1127348  | 1332909  | 1508202  |
| 280.2451 | 30.84092 | 30.74683 | 30.87583 | 8  | 4 | 4 | 1307636  | 3326658  | 6246078  |
| 545.3438 | 29.20675 | 29.16983 | 29.31467 | 10 | 5 | 5 | 12896786 | 88508556 | 82590319 |
| 511.3845 | 28.81175 | 28.803   | 28.82533 | 10 | 5 | 5 | 853168.5 | 3776642  | 4431039  |
| 253.1801 | 23.063   | 23.01583 | 23.08217 | 7  | 3 | 4 | 307228.3 | 1734305  | 1420208  |
| 878.643  | 34.70633 | 34.679   | 34.75783 | 6  | 2 | 4 | 311616.3 | 4853400  | 5912637  |
| 666.2304 | 29.11167 | 29.10917 | 29.12583 | 3  | 3 | 0 | 118192.1 | 430899.2 | 436192.4 |
| 317.2118 | 20.97917 | 20.96383 | 21.03617 | 5  | 3 | 2 | 359911.4 | 1979246  | 2314798  |
| 361.2227 | 31.08933 | 31.00267 | 31.12567 | 10 | 5 | 5 | 843733.2 | 4323231  | 4157625  |
| 906.6378 | 25.21217 | 25.14933 | 25.24283 | 5  | 3 | 2 | 126062.8 | 432241.8 | 612267   |
| 551.1411 | 43.57275 | 43.41083 | 43.61617 | 6  | 1 | 5 | 54814.79 | 286378   | 284120.6 |
| 348.1102 | 16.6925  | 16.65362 | 16.72017 | 6  | 2 | 4 | 65064.97 | 246489.4 | 371788.8 |
| 535.2742 | 18.08158 | 18.04267 | 18.155   | 6  | 2 | 4 | 168284.2 | 361904.6 | 583194.8 |
| 419.3637 | 27.62083 | 27.57883 | 27.67517 | 10 | 5 | 5 | 1193161  | 5395542  | 5861778  |
| 438.2398 | 8.8715   | 8.659567 | 8.94765  | 4  | 3 | 1 | 302238.7 | 786284.8 | 880655.7 |
| 415.1412 | 20.9775  | 20.93383 | 21.01983 | 7  | 2 | 5 | 204116.8 | 1117300  | 1467466  |
| 397.2858 | 15.5127  | 15.48555 | 15.51307 | 5  | 2 | 3 | 79194.37 | 179718   | 208881.7 |
| 762.5492 | 34.385   | 34.35167 | 34.408   | 9  | 4 | 5 | 367569.1 | 1624869  | 2025240  |
| 184.0735 | 29.17708 | 29.15567 | 29.21933 | 6  | 3 | 3 | 275868.1 | 1332203  | 1265479  |
| 365.1054 | 22.39133 | 22.34083 | 22.41483 | 5  | 2 | 3 | 76340.35 | 213190.3 | 307309.5 |
| 379.1685 | 11.64735 | 11.62662 | 11.81957 | 5  | 2 | 3 | 699865.4 | 817327.4 | 1623692  |
| 373.2151 | 9.55075  | 9.488017 | 9.584433 | 7  | 5 | 2 | 6851500  | 22585258 | 18459302 |
| 717.3313 | 10.86485 | 10.81963 | 10.88395 | 5  | 1 | 4 | 552520.8 | 741787.4 | 1225211  |
| 195.1229 | 28.6145  | 28.60983 | 28.6295  | 5  | 2 | 3 | 325443.3 | 2603390  | 1208429  |
| 294.1707 | 17.2765  | 17.2395  | 17.2935  | 7  | 4 | 3 | 175145.8 | 600364.6 | 651775.6 |
| 600.1193 | 20.64217 | 20.628   | 20.7265  | 7  | 2 | 5 | 603130.2 | 2127845  | 2923443  |
| 510.3468 | 29.78817 | 29.76717 | 29.89933 | 7  | 4 | 3 | 128644   | 633083.8 | 437560.9 |
| 333.3197 | 28.53283 | 28.5015  | 28.553   | 10 | 5 | 5 | 359534.9 | 1720556  | 1403961  |
| 527.2969 | 28.3805  | 28.32983 | 28.47817 | 9  | 5 | 4 | 516312.7 | 1825933  | 2295703  |
| 588.4217 | 11.02217 | 10.95727 | 11.0556  | 9  | 5 | 4 | 1771549  | 5891450  | 7177114  |
| 468.1667 | 15.64568 | 15.6059  | 15.65998 | 5  | 1 | 4 | 92064.29 | 263651.6 | 404909.9 |
| 331.2486 | 19.95667 | 19.9375  | 20.09133 | 7  | 3 | 4 | 109584.9 | 537115.5 | 611762.8 |
| 309.2066 | 31.15383 | 31.04533 | 31.18883 | 5  | 2 | 3 | 163270.4 | 826171.1 | 661449.6 |
| 270.2795 | 38.76517 | 38.718   | 38.80817 | 9  | 5 | 4 | 731822.3 | 2655805  | 2234607  |
| 599.2223 | 18.1035  | 18.06983 | 18.155   | 7  | 3 | 4 | 219905.6 | 638432.1 | 779860.6 |
| 403.233  | 35.02933 | 34.908   | 35.04317 | 7  | 3 | 4 | 183310   | 1295817  | 796246.7 |
| 559.8018 | 29.18433 | 29.111   | 29.2705  | 7  | 3 | 4 | 340616.6 | 968338.7 | 1317904  |

|          |          |          |          |    |   |   |          |          |          |
|----------|----------|----------|----------|----|---|---|----------|----------|----------|
| 309.2066 | 27.50225 | 27.38533 | 27.547   | 10 | 5 | 5 | 612453.6 | 2949090  | 3111431  |
| 303.1045 | 30.86433 | 30.84583 | 30.87817 | 4  | 1 | 3 | 94082.39 | 276007.6 | 319916.2 |
| 193.1954 | 20.378   | 20.33083 | 20.51283 | 8  | 4 | 4 | 79629.9  | 346545.8 | 323409.9 |
| 335.183  | 23.78708 | 23.74567 | 23.855   | 4  | 3 | 1 | 134619.8 | 364024.9 | 575475   |
| 310.1654 | 30.80633 | 30.74683 | 30.83517 | 3  | 0 | 3 | 88097.78 | 654839.5 | 264386.8 |
| 334.3381 | 32.79183 | 32.741   | 32.8405  | 10 | 5 | 5 | 119333.1 | 700149.5 | 377176.4 |
| 464.3145 | 20.35467 | 20.30983 | 20.52567 | 8  | 3 | 5 | 145157.4 | 571510.9 | 550805   |
| 228.2325 | 29.68083 | 29.6275  | 29.74033 | 7  | 3 | 4 | 63294.34 | 285489.2 | 281452.1 |
| 274.2097 | 32.96433 | 32.86217 | 32.99867 | 8  | 4 | 4 | 426215.9 | 2792885  | 2600975  |
| 305.1865 | 23.91433 | 23.8555  | 23.959   | 7  | 3 | 4 | 49639.04 | 162258.1 | 166877.9 |
| 575.9527 | 22.9965  | 22.97417 | 23.01883 | 7  | 2 | 5 | 276763.6 | 942716.6 | 1351524  |
| 299.2013 | 20.63708 | 20.58967 | 20.7355  | 10 | 5 | 5 | 5196160  | 28323452 | 29452300 |
| 704.5059 | 9.489217 | 9.3803   | 9.677167 | 8  | 4 | 3 | 17500046 | 51994891 | 82482863 |
| 289.2529 | 33.77133 | 33.749   | 33.7735  | 5  | 2 | 3 | 109139.1 | 591918.5 | 608061.8 |
| 574.3787 | 32.72067 | 32.64617 | 32.84617 | 8  | 4 | 4 | 160857.9 | 574737.3 | 638792.2 |
| 547.1342 | 22.1075  | 22.06867 | 22.136   | 5  | 2 | 3 | 49216.29 | 77920.61 | 86759.77 |
| 742.4964 | 31.63417 | 31.60233 | 31.67483 | 7  | 5 | 2 | 63425.58 | 296219.2 | 259616.2 |
| 382.3436 | 19.96317 | 19.94033 | 20.09133 | 7  | 3 | 4 | 58792.79 | 193904.1 | 221421.6 |
| 199.133  | 32.9465  | 32.86217 | 32.99867 | 9  | 5 | 4 | 986767.1 | 5935485  | 5418641  |
| 371.1015 | 42.73592 | 42.67917 | 42.7635  | 10 | 5 | 5 | 773343.6 | 5783234  | 2651816  |
| 370.2959 | 25.57767 | 25.54667 | 25.59917 | 7  | 3 | 4 | 155718.5 | 544594.7 | 541696.4 |
| 569.3441 | 29.13267 | 29.11167 | 29.22633 | 10 | 5 | 5 | 12482910 | 49760459 | 46212366 |
| 440.3359 | 27.3255  | 27.27983 | 27.36317 | 7  | 3 | 4 | 110016.1 | 391381.5 | 422296.7 |
| 329.0687 | 14.5143  | 14.41903 | 14.65548 | 7  | 2 | 4 | 258217.2 | 1329683  | 2489416  |
| 553.3953 | 32.1895  | 32.16233 | 32.22167 | 9  | 4 | 5 | 237218.1 | 932630.4 | 1120252  |
| 407.1352 | 18.43167 | 18.36533 | 18.48633 | 3  | 0 | 3 | 65837.58 | 168961.8 | 237008.5 |
| 283.1753 | 34.70542 | 34.56833 | 34.72917 | 4  | 3 | 1 | 301683.4 | 1816394  | 883804.5 |
| 541.4699 | 26.68017 | 26.64117 | 26.7235  | 7  | 3 | 4 | 55959.57 | 199810.5 | 193473.9 |
| 270.2068 | 24.94908 | 24.91983 | 25.006   | 6  | 3 | 3 | 99991.85 | 324339.6 | 338029.9 |
| 360.9884 | 22.06433 | 22.05267 | 22.12217 | 3  | 0 | 3 | 66674.9  | 249804.7 | 330406.2 |
| 718.523  | 34.5725  | 34.535   | 34.604   | 9  | 4 | 5 | 416854.5 | 1875883  | 2353661  |
| 458.3958 | 19.04017 | 19.0115  | 19.086   | 7  | 3 | 4 | 73375.32 | 175474.7 | 185495.6 |
| 358.2018 | 26.0025  | 25.949   | 26.03217 | 10 | 5 | 5 | 1396912  | 5955452  | 6911567  |
| 893.341  | 10.64838 | 10.61352 | 10.67897 | 4  | 1 | 3 | 1032751  | 1731833  | 3212033  |
| 719.5256 | 34.57083 | 34.53717 | 34.60117 | 7  | 3 | 4 | 60449.89 | 225967.2 | 318446.3 |
| 399.2602 | 8.925958 | 8.730367 | 9.0047   | 4  | 3 | 1 | 594265.1 | 704085.9 | 555045.7 |
| 328.1213 | 15.95405 | 15.63063 | 16.00043 | 7  | 2 | 3 | 1027273  | 6985537  | 10179904 |
| 327.0962 | 21.1285  | 21.1045  | 21.14683 | 4  | 4 | 0 | 75513.74 | 508816.2 | 284874.9 |
| 629.4675 | 34.98433 | 34.92267 | 35.009   | 10 | 5 | 5 | 1699464  | 8531454  | 10437827 |
| 972.6493 | 29.65117 | 29.535   | 29.68667 | 9  | 5 | 3 | 58212.7  | 257190.9 | 79014.72 |
| 460.1645 | 10.6487  | 10.60657 | 10.77118 | 4  | 1 | 3 | 153974   | 336863.9 | 432127.8 |
| 550.4042 | 43.85208 | 43.82333 | 43.8905  | 4  | 1 | 3 | 48467.01 | 191032.7 | 38391.92 |
| 380.3092 | 28.70233 | 28.68267 | 28.70933 | 10 | 5 | 5 | 600797.2 | 2838189  | 3285529  |
| 315.1959 | 38.376   | 38.3675  | 38.45983 | 5  | 3 | 2 | 45508.54 | 288341.1 | 112815.3 |
| 587.4182 | 11.03025 | 10.9416  | 11.1665  | 9  | 4 | 5 | 5104820  | 18479220 | 22531062 |
| 334.7297 | 8.7119   | 8.479117 | 8.754817 | 4  | 3 | 1 | 161675.6 | 237409.5 | 256617.2 |
| 275.1414 | 27.17183 | 27.11983 | 27.1805  | 3  | 0 | 3 | 29369.83 | 68369.13 | 76249.35 |

|          |          |          |          |    |   |   |          |          |          |
|----------|----------|----------|----------|----|---|---|----------|----------|----------|
| 635.2518 | 29.15467 | 29.08283 | 29.29983 | 5  | 3 | 2 | 116930.7 | 160109.6 | 110839.5 |
| 596.2342 | 32.13383 | 32.0875  | 32.14983 | 6  | 1 | 5 | 299452.6 | 514610.5 | 1129355  |
| 641.2648 | 30.80433 | 30.74683 | 30.86417 | 4  | 1 | 3 | 64677.03 | 146060.6 | 171785.1 |
| 577.3939 | 24.7515  | 24.726   | 24.79483 | 5  | 2 | 3 | 54563.26 | 121261.5 | 172810.8 |
| 150.0268 | 30.84108 | 30.71867 | 30.90333 | 10 | 5 | 5 | 519288.4 | 3417493  | 3982177  |
| 221.1176 | 28.14617 | 28.04433 | 28.16833 | 10 | 5 | 5 | 8016686  | 48540493 | 49874985 |
| 520.9504 | 18.14683 | 18.1235  | 18.22983 | 3  | 0 | 3 | 32809.51 | 135160.6 | 147312.8 |
| 356.0071 | 16.93567 | 16.893   | 16.96167 | 8  | 3 | 5 | 394412.9 | 1907579  | 2388324  |
| 548.3624 | 30.84783 | 30.8325  | 30.95983 | 10 | 5 | 5 | 353216.3 | 1890947  | 1622413  |
| 674.4968 | 34.77433 | 34.73567 | 34.792   | 10 | 5 | 5 | 411253.2 | 1793042  | 2272948  |
| 413.1611 | 20.98525 | 20.95533 | 21.0485  | 6  | 2 | 4 | 688937.4 | 3717622  | 4893408  |
| 295.2103 | 28.14233 | 28.04433 | 28.1765  | 10 | 5 | 5 | 4156781  | 22426270 | 23866292 |
| 551.2631 | 31.05217 | 30.90517 | 31.11633 | 5  | 2 | 3 | 317407.7 | 507963.1 | 926467.4 |
| 421.2784 | 12.3941  | 12.37127 | 12.42385 | 5  | 3 | 2 | 54024.98 | 114799.1 | 130978.3 |
| 1837.517 | 9.483058 | 9.460417 | 9.537367 | 4  | 1 | 3 | 9491711  | 10022808 | 20355077 |
| 620.1759 | 22.35567 | 22.262   | 22.37883 | 7  | 3 | 4 | 83717.77 | 227238.4 | 260288.5 |
| 544.3165 | 7.450158 | 7.441983 | 7.535167 | 4  | 1 | 3 | 401395.8 | 422073.5 | 829036.9 |
| 420.1294 | 13.75314 | 13.69598 | 13.80607 | 6  | 2 | 4 | 71358.05 | 348089   | 357942.4 |
| 646.2661 | 29.21333 | 29.16983 | 29.32917 | 7  | 3 | 4 | 134902.6 | 542617.3 | 559511.8 |
| 185.0963 | 19.55567 | 19.50233 | 19.58883 | 7  | 3 | 4 | 55044.96 | 366668.8 | 200558.9 |
| 196.0696 | 16.6925  | 16.6415  | 16.72033 | 8  | 3 | 5 | 419936.8 | 2128661  | 2820025  |
| 315.1962 | 26.64692 | 26.601   | 26.68133 | 10 | 5 | 5 | 3688107  | 16020359 | 17245661 |
| 289.2378 | 33.36183 | 33.30233 | 33.38417 | 5  | 2 | 3 | 93513.7  | 505467   | 355376   |
| 367.7578 | 9.5169   | 9.337217 | 9.577667 | 5  | 1 | 3 | 4857129  | 4220643  | 8303255  |
| 1186.161 | 28.9205  | 28.8525  | 28.9805  | 6  | 2 | 4 | 52398.9  | 160061.4 | 210478.5 |
| 209.2085 | 10.07678 | 9.9907   | 10.18403 | 6  | 3 | 3 | 6980993  | 27098689 | 39915721 |
| 540.6732 | 29.21425 | 29.18433 | 29.31467 | 10 | 5 | 5 | 161739.4 | 899756.9 | 769407.4 |
| 323.5282 | 8.87615  | 8.677417 | 8.919867 | 7  | 4 | 3 | 417008.8 | 804158   | 587524.6 |
| 365.1415 | 26.06317 | 26.01917 | 26.11683 | 5  | 2 | 3 | 129478.4 | 298272.8 | 512608.8 |
| 557.1627 | 22.15117 | 22.1125  | 22.17967 | 5  | 2 | 3 | 143210   | 341452.2 | 489472.1 |
| 374.2377 | 9.178    | 9.0693   | 9.239033 | 7  | 5 | 2 | 3085700  | 7917722  | 7687383  |
| 577.9482 | 23.004   | 22.97417 | 23.02483 | 6  | 2 | 4 | 102188.8 | 249292.4 | 419396.1 |
| 402.5883 | 29.6365  | 29.57833 | 29.65167 | 5  | 3 | 2 | 31987.72 | 95404.83 | 107160.8 |
| 349.2014 | 33.94758 | 33.89583 | 33.988   | 6  | 2 | 4 | 45221.31 | 224675.9 | 172043.3 |
| 471.317  | 10.36155 | 10.22325 | 10.37953 | 5  | 2 | 3 | 608831.8 | 706489.9 | 1061006  |
| 454.0521 | 32.1775  | 32.05867 | 32.26167 | 6  | 3 | 3 | 32885.15 | 63672.77 | 102467.3 |
| 423.1126 | 43.37025 | 43.26217 | 43.402   | 10 | 5 | 5 | 88174.66 | 1000038  | 232505.2 |
| 458.1634 | 20.63708 | 20.58967 | 20.7265  | 10 | 5 | 5 | 2475825  | 9864400  | 13011919 |
| 485.1125 | 18.128   | 18.0555  | 18.158   | 8  | 3 | 5 | 1559945  | 4986630  | 8279503  |
| 650.4658 | 41.19333 | 41.16317 | 41.23733 | 10 | 5 | 5 | 51261    | 248653.7 | 209899.4 |
| 368.2801 | 22.85933 | 22.845   | 22.89467 | 5  | 2 | 3 | 55199.01 | 139188.5 | 155224.6 |
| 679.5127 | 15.50173 | 15.37532 | 15.59742 | 4  | 1 | 3 | 3041151  | 18903740 | 14562098 |
| 598.2652 | 30.96467 | 30.943   | 31.07383 | 10 | 5 | 5 | 311396.3 | 1660599  | 1098113  |
| 533.222  | 10.72138 | 10.70767 | 10.77308 | 5  | 1 | 4 | 2755051  | 7133515  | 14319971 |
| 565.3634 | 9.151067 | 9.004633 | 9.2493   | 7  | 5 | 2 | 1118681  | 1655624  | 1040048  |
| 454.3298 | 27.11592 | 27.063   | 27.20017 | 10 | 5 | 5 | 345442.8 | 1483442  | 1251326  |
| 725.5967 | 31.14183 | 31.08133 | 31.172   | 7  | 4 | 3 | 260241.9 | 769398.2 | 688722.1 |

|          |          |          |          |    |   |   |          |          |          |
|----------|----------|----------|----------|----|---|---|----------|----------|----------|
| 225.08   | 15.63075 | 15.61248 | 15.64528 | 6  | 1 | 5 | 167414.1 | 517105.3 | 620811.4 |
| 266.1391 | 22.93883 | 22.889   | 22.98967 | 6  | 2 | 4 | 68679.42 | 292635.5 | 279720.9 |
| 323.2892 | 17.51508 | 17.4725  | 17.56    | 4  | 1 | 3 | 69666.23 | 149430.3 | 184276.5 |
| 393.3809 | 18.9315  | 18.83817 | 19.04167 | 6  | 2 | 4 | 169821   | 449789.3 | 584984.5 |
| 559.4076 | 18.822   | 18.81617 | 18.89383 | 7  | 4 | 3 | 86481.02 | 272176.3 | 255920.8 |
| 443.0828 | 18.12092 | 18.08433 | 18.17383 | 8  | 3 | 5 | 1428535  | 4411799  | 7274008  |
| 567.4107 | 35.22    | 35.15933 | 35.25083 | 7  | 3 | 4 | 110770.1 | 428261.5 | 539948.4 |
| 426.9341 | 20.09908 | 20.06783 | 20.11383 | 4  | 1 | 3 | 38024.57 | 91655.12 | 182255.2 |
| 284.3316 | 32.9765  | 32.91833 | 33.02017 | 9  | 4 | 5 | 53980.72 | 339709.3 | 76778.68 |
| 763.5264 | 26.789   | 26.7375  | 26.8115  | 5  | 2 | 3 | 29731.41 | 76035.82 | 91916.17 |
| 655.4638 | 34.76917 | 34.73567 | 34.7925  | 5  | 2 | 3 | 110825.8 | 399920.3 | 534403.4 |
| 274.0529 | 30.38875 | 30.34733 | 30.474   | 4  | 1 | 3 | 522751.5 | 1250186  | 2584799  |
| 326.9392 | 12.93202 | 12.91803 | 13.00747 | 4  | 1 | 3 | 659021.4 | 2597850  | 4863355  |
| 503.2968 | 28.37133 | 28.32717 | 28.47817 | 9  | 5 | 4 | 1676845  | 6826730  | 8380334  |
| 571.0341 | 16.93417 | 16.9035  | 16.96167 | 7  | 3 | 4 | 409575.5 | 1026159  | 1907476  |
| 497.5299 | 27.45958 | 27.44817 | 27.53083 | 6  | 3 | 3 | 50883.8  | 266936.9 | 247946.1 |
| 401.3574 | 20.50958 | 20.498   | 20.64567 | 6  | 2 | 4 | 50206.43 | 139137.1 | 164081.4 |
| 315.1957 | 23.8845  | 23.81117 | 23.9305  | 3  | 3 | 0 | 192516.8 | 689571.2 | 833908.9 |
| 523.1403 | 18.13633 | 18.09117 | 18.189   | 6  | 3 | 3 | 200637.5 | 548366.1 | 961782.5 |
| 630.4703 | 34.97983 | 34.77183 | 35.009   | 10 | 4 | 5 | 301167.4 | 1292355  | 1629048  |
| 660.5076 | 9.47815  | 9.173283 | 9.537367 | 5  | 1 | 3 | 55537848 | 39836585 | 79444047 |
| 312.3629 | 37.82933 | 37.782   | 37.98867 | 9  | 5 | 4 | 30850.33 | 203906.2 | 44789.42 |
| 297.1116 | 22.12808 | 22.05267 | 22.14983 | 10 | 5 | 5 | 3717592  | 17546120 | 22449300 |
| 326.3785 | 35.01625 | 34.998   | 35.07    | 10 | 5 | 5 | 1190509  | 5076866  | 2821873  |
| 259.1907 | 29.50567 | 29.40433 | 29.56183 | 7  | 3 | 4 | 485433.8 | 2066368  | 2286051  |
| 236.13   | 19.36233 | 19.32383 | 19.38567 | 6  | 2 | 4 | 79983.3  | 259752.4 | 253144   |
| 444.3396 | 9.833883 | 9.804217 | 9.869583 | 5  | 2 | 3 | 309654.7 | 397918.1 | 523363.8 |
| 495.3281 | 27.45958 | 27.427   | 27.53083 | 10 | 5 | 5 | 3844509  | 29225429 | 29684482 |
| 372.2902 | 33.93033 | 33.869   | 33.938   | 9  | 5 | 4 | 406545.2 | 1354951  | 1926716  |
| 524.3017 | 30.9645  | 30.9325  | 31.07383 | 7  | 4 | 3 | 328601.2 | 899854   | 898138.5 |
| 309.2834 | 28.42175 | 28.3955  | 28.45267 | 10 | 5 | 5 | 772272.6 | 3571750  | 4297190  |
| 394.2746 | 30.61733 | 30.543   | 30.63583 | 7  | 3 | 4 | 86297.35 | 331927.7 | 339077.2 |
| 411.3419 | 18.95317 | 18.92483 | 18.967   | 6  | 3 | 3 | 57585.99 | 173542.2 | 170735.8 |
| 483.3913 | 20.487   | 20.46167 | 20.6345  | 10 | 5 | 5 | 479547.9 | 1998540  | 2174705  |
| 553.0224 | 27.17158 | 27.1105  | 27.20067 | 8  | 3 | 5 | 1174609  | 4098959  | 5798217  |
| 697.4642 | 9.904433 | 9.866317 | 9.948533 | 5  | 2 | 3 | 302669.6 | 325941.8 | 513125.9 |
| 330.0047 | 27.89517 | 27.76383 | 27.94633 | 7  | 3 | 4 | 492842.3 | 1737995  | 2354835  |
| 385.3427 | 23.28875 | 23.23917 | 23.353   | 10 | 5 | 5 | 51862636 | 2.7E+08  | 2.76E+08 |
| 318.2642 | 32.41883 | 32.39533 | 32.46033 | 3  | 0 | 3 | 101362.7 | 602195   | 471004.8 |
| 483.3436 | 15.81155 | 15.72362 | 15.90278 | 10 | 5 | 5 | 90422.16 | 313669.8 | 274470.6 |
| 554.0259 | 27.17767 | 27.12967 | 27.208   | 6  | 2 | 4 | 296894.8 | 1054192  | 1505068  |
| 457.0598 | 20.43792 | 20.397   | 20.464   | 4  | 1 | 3 | 41499.54 | 90810.99 | 127251.5 |
| 400.1295 | 20.64217 | 20.61367 | 20.687   | 6  | 3 | 3 | 171327.3 | 565312.1 | 770195.9 |
| 301.1591 | 31.11008 | 31.04533 | 31.1565  | 8  | 3 | 5 | 341634.8 | 1406349  | 1563978  |
| 333.2765 | 36.6405  | 36.60717 | 36.82833 | 5  | 4 | 1 | 135896.8 | 544407.9 | 695774.7 |
| 376.2853 | 28.13233 | 28.04433 | 28.176   | 7  | 3 | 4 | 71622.04 | 280487.1 | 259285.2 |
| 524.3877 | 35.44525 | 35.38883 | 35.47267 | 4  | 1 | 3 | 23363.78 | 76405.73 | 79058.27 |

|          |          |          |          |    |   |   |          |          |          |
|----------|----------|----------|----------|----|---|---|----------|----------|----------|
| 812.0798 | 22.99025 | 22.97417 | 23.01883 | 6  | 2 | 4 | 348519.9 | 985578.9 | 1339154  |
| 691.006  | 10.36155 | 10.20952 | 10.38373 | 7  | 3 | 4 | 851890.3 | 1479018  | 1872769  |
| 256.1334 | 9.186383 | 9.101033 | 9.254883 | 9  | 5 | 4 | 11656182 | 22523681 | 33085835 |
| 297.243  | 26.8375  | 26.76533 | 26.88367 | 9  | 4 | 5 | 706197.7 | 4442323  | 4640878  |
| 813.5872 | 11.48481 | 11.38147 | 11.67042 | 10 | 5 | 5 | 1914611  | 7896307  | 9726915  |
| 816.3299 | 10.6783  | 10.599   | 10.75237 | 8  | 4 | 4 | 1175947  | 2330660  | 4259486  |
| 341.5827 | 9.483542 | 9.43065  | 9.537367 | 4  | 1 | 3 | 2030895  | 3900244  | 4572293  |
| 353.3096 | 28.60858 | 28.58283 | 28.6295  | 10 | 5 | 5 | 419885.8 | 1983224  | 2319720  |
| 657.1328 | 18.10333 | 18.07617 | 18.14    | 4  | 1 | 3 | 100873.3 | 205542.5 | 335957.3 |
| 728.3636 | 20.66375 | 20.61367 | 20.7355  | 6  | 2 | 4 | 320442.4 | 804405   | 1023254  |
| 236.6267 | 9.186383 | 9.15355  | 9.2529   | 5  | 2 | 3 | 1907719  | 2461584  | 3689097  |
| 361.2856 | 27.22325 | 27.17183 | 27.24383 | 6  | 3 | 3 | 60166.68 | 246625.2 | 240201.9 |
| 529.4331 | 24.124   | 24.066   | 24.1805  | 5  | 2 | 3 | 63926.09 | 173098.1 | 219142.6 |
| 270.2067 | 12.96105 | 12.85795 | 13.00802 | 5  | 3 | 2 | 43015.25 | 132839.7 | 129610.9 |
| 289.2935 | 21.95883 | 21.87817 | 21.9935  | 8  | 4 | 4 | 313526.3 | 987191.6 | 1097644  |
| 411.3257 | 31.5875  | 31.5775  | 31.69017 | 4  | 1 | 3 | 35193.05 | 146386.8 | 116936.5 |
| 494.7781 | 30.96717 | 30.96417 | 30.97633 | 3  | 3 | 0 | 31241.38 | 75627.24 | 50193.28 |
| 298.3472 | 30.79542 | 30.74683 | 30.85917 | 10 | 5 | 5 | 1216259  | 2482938  | 2472111  |
| 308.0902 | 14.65217 | 14.63045 | 14.69875 | 7  | 3 | 4 | 102373.8 | 589743.4 | 735625.7 |
| 983.4558 | 27.22267 | 27.186   | 27.25533 | 7  | 3 | 4 | 96948.08 | 289488.4 | 299233.1 |
| 275.2131 | 32.4975  | 32.37967 | 32.53617 | 7  | 3 | 4 | 119039.9 | 451268.2 | 468868.1 |
| 321.6741 | 11.03635 | 11.00837 | 11.04118 | 5  | 2 | 3 | 147789.9 | 371983.9 | 643124.7 |
| 270.2513 | 29.69533 | 29.59333 | 29.74033 | 9  | 4 | 5 | 580869.5 | 3210204  | 3354709  |
| 479.3585 | 35.76317 | 35.748   | 35.80017 | 6  | 2 | 4 | 36111.02 | 133546.5 | 160408.6 |
| 328.2125 | 19.276   | 19.258   | 19.53217 | 5  | 3 | 2 | 234092.5 | 1285495  | 1222035  |
| 309.2067 | 25.61342 | 25.54033 | 25.6385  | 10 | 5 | 5 | 2431900  | 9842847  | 11886385 |
| 631.4725 | 34.95583 | 34.896   | 34.99983 | 6  | 2 | 3 | 50821.24 | 146554.1 | 194962.6 |
| 560.4508 | 31.63033 | 31.59733 | 31.66967 | 5  | 2 | 3 | 74070.1  | 274947   | 225186.4 |
| 277.1804 | 28.13858 | 28.05933 | 28.20033 | 10 | 5 | 5 | 1164543  | 6695466  | 6938286  |
| 579.0212 | 22.1215  | 22.09783 | 22.1355  | 5  | 2 | 3 | 135681.5 | 323299.9 | 497771.6 |
| 630.444  | 20.10992 | 20.01083 | 20.23717 | 8  | 2 | 5 | 121316.7 | 1290926  | 1452929  |
| 378.1518 | 9.537367 | 9.47815  | 9.545617 | 3  | 0 | 3 | 7767808  | 9443314  | 15567422 |
| 244.0099 | 22.65025 | 22.60467 | 22.69    | 8  | 4 | 4 | 97163.25 | 325752.7 | 319216.5 |
| 415.2119 | 23.17692 | 23.10367 | 23.20917 | 10 | 5 | 5 | 13005713 | 72621239 | 58409247 |
| 583.2534 | 28.58517 | 28.5565  | 28.65783 | 5  | 2 | 3 | 82495.36 | 300051.5 | 361734.1 |
| 332.2227 | 14.55019 | 14.53727 | 14.57152 | 4  | 1 | 3 | 122551.5 | 776175.1 | 719707.4 |
| 493.3069 | 19.937   | 19.91883 | 20.05783 | 5  | 1 | 4 | 41692.97 | 132203.5 | 140850.7 |
| 642.4662 | 17.20708 | 17.17867 | 17.25317 | 10 | 5 | 5 | 191301.4 | 889832.4 | 805150.6 |
| 513.1797 | 10.41531 | 10.39262 | 10.45082 | 4  | 3 | 1 | 368288.6 | 785690.5 | 674062.9 |
| 411.2195 | 36.63517 | 36.6005  | 36.68217 | 5  | 2 | 3 | 40976.37 | 186465.4 | 124959.2 |
| 462.3536 | 23.4275  | 23.399   | 23.44783 | 7  | 4 | 3 | 229951.8 | 901918.8 | 1004589  |
| 255.2639 | 22.1355  | 22.11583 | 22.1365  | 5  | 2 | 3 | 61754.71 | 180870.2 | 265930.2 |
| 950.6642 | 25.24225 | 25.17983 | 25.28967 | 4  | 1 | 3 | 70104.64 | 216125.5 | 298523.2 |
| 301.1629 | 10.03431 | 9.90985  | 10.14115 | 4  | 1 | 3 | 571537.7 | 1210010  | 1522790  |
| 174.149  | 11.90233 | 11.82847 | 11.92673 | 4  | 1 | 3 | 30106.01 | 69909.74 | 82545.64 |
| 687.5439 | 25.609   | 25.51417 | 25.65733 | 7  | 4 | 3 | 283711.2 | 1009242  | 1193590  |
| 249.1853 | 27.36608 | 27.271   | 27.42483 | 8  | 3 | 5 | 682857.3 | 3259918  | 3576229  |

|          |          |          |          |    |   |   |          |          |          |
|----------|----------|----------|----------|----|---|---|----------|----------|----------|
| 386.3461 | 23.28875 | 23.23917 | 23.353   | 10 | 5 | 5 | 12999051 | 65419050 | 67254094 |
| 770.4151 | 9.547492 | 9.47815  | 9.5571   | 6  | 3 | 3 | 25918224 | 50143860 | 91513837 |
| 697.1263 | 9.4881   | 9.3803   | 9.55075  | 5  | 2 | 3 | 4555505  | 6294364  | 10484989 |
| 444.2138 | 16.64746 | 16.60533 | 16.6685  | 10 | 5 | 5 | 231522.1 | 818364.9 | 840562   |
| 329.0059 | 20.09017 | 20.04883 | 20.22117 | 8  | 4 | 4 | 260808.1 | 1598105  | 1096429  |
| 428.1528 | 26.654   | 26.62717 | 26.68133 | 7  | 3 | 4 | 163094.7 | 659884.7 | 724886.5 |
| 700.3987 | 9.482133 | 9.444983 | 9.537367 | 4  | 1 | 3 | 97153144 | 67737010 | 1.35E+08 |
| 584.261  | 23.707   | 23.67733 | 23.70833 | 3  | 0 | 3 | 43199.72 | 158661   | 76395.47 |
| 422.2908 | 38.09842 | 38.0475  | 38.12717 | 8  | 4 | 4 | 135899   | 744510.6 | 591704.8 |
| 453.1843 | 21.02017 | 20.97867 | 21.06283 | 5  | 2 | 3 | 3600955  | 22821469 | 30234854 |
| 371.1311 | 20.63708 | 20.58967 | 20.7355  | 10 | 5 | 5 | 2271697  | 8917454  | 11738295 |
| 583.1978 | 25.66467 | 25.62817 | 25.689   | 4  | 1 | 3 | 80585.17 | 121263.3 | 253483.5 |
| 630.4437 | 29.345   | 29.29983 | 29.37383 | 5  | 2 | 3 | 45618.77 | 173518.6 | 183583.2 |
| 360.0047 | 18.10883 | 18.047   | 18.16117 | 5  | 1 | 4 | 68566.82 | 292631.6 | 353675.8 |
| 313.1677 | 43.60817 | 43.55817 | 43.63283 | 7  | 3 | 4 | 131827.8 | 863077.5 | 716809.3 |
| 256.2638 | 23.6495  | 23.57567 | 23.69233 | 10 | 5 | 5 | 366440.8 | 1346608  | 1549331  |
| 348.7308 | 9.515    | 9.43065  | 9.537367 | 5  | 2 | 3 | 2839960  | 5304828  | 6688950  |
| 530.4174 | 28.81408 | 28.78783 | 28.82533 | 8  | 3 | 5 | 160292.3 | 681792.2 | 799446.3 |
| 454.1876 | 20.999   | 20.95283 | 21.06283 | 8  | 3 | 5 | 946732.1 | 5301807  | 7118234  |
| 443.1584 | 37.02017 | 36.99267 | 37.04933 | 3  | 0 | 3 | 68852.8  | 360444.1 | 220743.4 |
| 271.9163 | 2.091    | 2.032667 | 2.134067 | 7  | 4 | 3 | 117960.2 | 718917.4 | 465708.1 |
| 304.3003 | 27.94117 | 27.88167 | 28.02533 | 10 | 5 | 5 | 6468487  | 35274156 | 31766958 |
| 250.1886 | 27.3695  | 27.271   | 27.42483 | 5  | 2 | 3 | 96578.54 | 349040.6 | 368379.7 |
| 521.3438 | 28.29492 | 28.2685  | 28.395   | 6  | 3 | 3 | 873207.6 | 4111715  | 4094409  |
| 658.2347 | 41.20767 | 41.16333 | 41.25083 | 9  | 5 | 4 | 48808.96 | 243916.5 | 224969.2 |
| 227.2008 | 32.2565  | 32.20817 | 32.28917 | 10 | 5 | 5 | 999581.8 | 6673348  | 6807908  |
| 739.1947 | 25.62758 | 25.59233 | 25.6595  | 8  | 4 | 4 | 112537.6 | 433535   | 520696.2 |
| 464.3288 | 9.192183 | 9.101033 | 9.266617 | 5  | 3 | 2 | 1890011  | 3479175  | 4438571  |
| 523.3593 | 32.11683 | 32.07333 | 32.20817 | 10 | 5 | 5 | 16759946 | 1.05E+08 | 1.02E+08 |
| 255.196  | 18.8525  | 18.79    | 18.93733 | 9  | 4 | 5 | 608879.6 | 4948318  | 4095744  |
| 322.2461 | 33.85492 | 33.84033 | 33.86767 | 4  | 0 | 4 | 230029.7 | 1532242  | 416773.1 |
| 548.2441 | 27.45958 | 27.427   | 27.53083 | 10 | 5 | 5 | 1609769  | 7376051  | 9373234  |
| 238.1885 | 25.79258 | 25.4595  | 25.83717 | 10 | 5 | 5 | 634558.3 | 2312608  | 2242851  |
| 356.3353 | 31.10333 | 31.06667 | 31.11333 | 5  | 3 | 2 | 56148.07 | 289564.5 | 182855.8 |
| 494.3609 | 30.679   | 30.5885  | 30.8175  | 7  | 4 | 3 | 73191.34 | 276140.4 | 272280.3 |
| 688.4861 | 22.31083 | 22.26733 | 22.49083 | 5  | 1 | 3 | 105060.9 | 988977   | 1156186  |
| 489.3805 | 24.10525 | 24.06283 | 24.12133 | 8  | 3 | 5 | 241073.5 | 975571.7 | 1171342  |
| 308.8634 | 23.01967 | 22.98833 | 23.06783 | 6  | 2 | 4 | 67417.54 | 211543.7 | 38481.95 |
| 302.7505 | 23.666   | 23.635   | 23.707   | 5  | 2 | 3 | 29905.92 | 87097.29 | 101527.5 |
| 643.4834 | 21.3125  | 21.2555  | 21.344   | 5  | 3 | 2 | 73937.84 | 200334.8 | 260912.7 |
| 411.2149 | 19.55667 | 19.54033 | 19.65933 | 6  | 3 | 3 | 40429.72 | 137142.1 | 121451.2 |
| 343.2599 | 11.09468 | 11.05533 | 11.31892 | 7  | 3 | 4 | 223733.7 | 927229   | 720548.6 |
| 367.1882 | 10.39373 | 10.36523 | 10.43838 | 5  | 2 | 3 | 5110987  | 8620459  | 13910563 |
| 395.1409 | 33.50758 | 33.45    | 33.51917 | 4  | 3 | 1 | 56365.76 | 175292   | 214437.1 |
| 294.1381 | 32.13617 | 32.0735  | 32.16417 | 7  | 2 | 5 | 67469.02 | 223150.4 | 299648.2 |
| 351.1812 | 22.06567 | 21.98917 | 22.0925  | 10 | 5 | 5 | 410057.5 | 1618901  | 1689505  |
| 247.1736 | 14.56677 | 14.4543  | 14.66978 | 5  | 3 | 2 | 43001.86 | 246345.6 | 276260.3 |



|          |          |          |          |    |   |   |          |          |          |
|----------|----------|----------|----------|----|---|---|----------|----------|----------|
| 544.3406 | 29.96725 | 29.91617 | 30.146   | 4  | 1 | 3 | 1239200  | 4680466  | 3475908  |
| 369.7769 | 9.534967 | 9.4881   | 9.5641   | 5  | 1 | 4 | 2507556  | 3306849  | 6062095  |
| 455.1846 | 20.98483 | 20.94567 | 21.0485  | 6  | 3 | 3 | 1913860  | 10658600 | 13474146 |
| 491.1612 | 10.4086  | 10.36523 | 10.41965 | 6  | 1 | 5 | 16825948 | 28541334 | 44897368 |
| 447.2934 | 11.7851  | 11.71578 | 11.85133 | 6  | 2 | 4 | 161871.3 | 910690.1 | 995903.1 |
| 552.2237 | 21.73208 | 21.60133 | 21.754   | 10 | 5 | 5 | 568760   | 2653561  | 2725764  |
| 454.3379 | 29.3745  | 29.34667 | 29.393   | 5  | 2 | 3 | 237503   | 666508.8 | 340682.7 |
| 291.1835 | 22.74817 | 22.70417 | 22.79867 | 7  | 3 | 4 | 68468.12 | 213238.8 | 211985.6 |
| 526.1393 | 18.11767 | 18.04133 | 18.158   | 7  | 2 | 5 | 389958   | 1176102  | 1905078  |
| 655.3361 | 41.19333 | 41.16333 | 41.23617 | 10 | 5 | 5 | 11137387 | 69359617 | 48198505 |
| 534.3431 | 43.41858 | 43.36733 | 43.43333 | 6  | 3 | 3 | 43372.74 | 240269.9 | 159335.6 |
| 256.2637 | 32.62967 | 32.574   | 32.6565  | 7  | 3 | 4 | 149622   | 569850.6 | 682612.4 |
| 546.3466 | 29.21342 | 29.19333 | 29.31467 | 10 | 5 | 5 | 2305064  | 13353053 | 12010727 |
| 208.0795 | 11.119   | 11.02605 | 11.27893 | 4  | 3 | 1 | 54693    | 53167.39 | 32817.22 |
| 191.1068 | 25.98917 | 25.9325  | 26.01533 | 5  | 2 | 3 | 82356.61 | 433048.7 | 377605.5 |
| 542.3909 | 26.63983 | 26.601   | 26.66583 | 9  | 4 | 5 | 222621.7 | 803770.4 | 945167.2 |
| 345.2068 | 17.14517 | 17.10717 | 17.18083 | 5  | 3 | 2 | 156119.1 | 617598.4 | 660520.2 |
| 468.3523 | 20.4155  | 20.3765  | 20.588   | 9  | 5 | 4 | 118280.6 | 385125.3 | 395784.6 |
| 286.2746 | 29.7105  | 29.60783 | 29.74033 | 7  | 3 | 4 | 242411.6 | 1553314  | 1499315  |
| 295.6771 | 28.14233 | 28.04433 | 28.1765  | 8  | 3 | 5 | 76279.28 | 373384.4 | 423325.9 |
| 495.0408 | 19.71183 | 19.63017 | 19.74033 | 6  | 2 | 4 | 301013.8 | 778580   | 1681662  |
| 472.3638 | 29.89533 | 29.87917 | 29.95767 | 5  | 1 | 4 | 60137.57 | 311592.2 | 192471.6 |
| 592.2986 | 10.69263 | 10.56983 | 10.77118 | 7  | 3 | 4 | 8381423  | 12626273 | 27059594 |
| 583.8018 | 29.16983 | 29.15517 | 29.2705  | 7  | 3 | 4 | 607566.4 | 1725829  | 2301379  |
| 542.3907 | 29.359   | 29.33233 | 29.36467 | 6  | 3 | 3 | 109226.2 | 234060.5 | 309579   |
| 743.1789 | 26.88283 | 26.84017 | 26.919   | 7  | 2 | 5 | 71258.88 | 203393.3 | 276105.5 |
| 396.3324 | 34.15708 | 34.09217 | 34.16183 | 4  | 1 | 3 | 39196.84 | 161076.9 | 112024.8 |
| 249.1853 | 26.45883 | 26.3845  | 26.5405  | 6  | 3 | 3 | 350540.1 | 1785246  | 1739405  |
| 237.1852 | 25.12975 | 25.06783 | 25.1385  | 8  | 4 | 4 | 965493.9 | 2227991  | 2064938  |
| 294.8836 | 2.148567 | 2.08755  | 2.24535  | 5  | 3 | 2 | 182952.9 | 640576.6 | 622153.5 |
| 200.0835 | 30.777   | 30.71867 | 30.79183 | 3  | 0 | 3 | 60934.34 | 180698.7 | 164739.8 |
| 239.1623 | 20.44175 | 20.40683 | 20.56367 | 10 | 5 | 5 | 698946.2 | 3369724  | 2927772  |
| 157.0837 | 6.972383 | 6.601917 | 7.2078   | 7  | 4 | 2 | 1063915  | 12702168 | 22413602 |
| 252.1057 | 23.53733 | 23.4595  | 23.57583 | 7  | 3 | 4 | 79639.17 | 283705   | 317096.8 |
| 721.4188 | 20.4375  | 20.411   | 20.56367 | 5  | 2 | 3 | 84885.56 | 212826.3 | 283617   |
| 627.5093 | 10.86975 | 10.86473 | 10.9188  | 3  | 0 | 3 | 2836735  | 1955147  | 3195809  |
| 905.6833 | 9.187083 | 9.101033 | 9.319483 | 5  | 3 | 2 | 6736834  | 4192747  | 6794402  |
| 747.5672 | 34.952   | 34.9395  | 34.95867 | 5  | 2 | 3 | 324549.8 | 5780673  | 8125855  |
| 295.1908 | 24.59133 | 24.5315  | 24.62383 | 7  | 3 | 4 | 357614.5 | 1495936  | 1339864  |
| 638.3032 | 19.14875 | 19.09167 | 19.17367 | 10 | 5 | 5 | 116733.5 | 483610.9 | 445527.4 |
| 297.2069 | 18.14717 | 18.09867 | 18.21483 | 5  | 2 | 3 | 120463.2 | 758229.5 | 665913   |
| 211.1697 | 15.99818 | 15.92467 | 16.07195 | 4  | 3 | 1 | 348863.7 | 3372327  | 3795538  |
| 355.3324 | 31.11017 | 31.09517 | 31.14133 | 9  | 5 | 4 | 273911.1 | 1655390  | 1244997  |
| 426.3582 | 33.94983 | 33.91533 | 33.99433 | 7  | 3 | 4 | 82638.59 | 599747.9 | 453197.3 |
| 427.1242 | 22.42967 | 22.37583 | 22.44833 | 3  | 0 | 3 | 63424.66 | 131072.6 | 189928.9 |
| 431.2046 | 10.68129 | 10.599   | 10.75237 | 8  | 4 | 4 | 7802204  | 19825285 | 39762402 |
| 702.1146 | 9.537367 | 9.473767 | 9.59295  | 3  | 0 | 3 | 1356789  | 1452988  | 1370906  |

|          |          |          |          |    |   |   |          |          |          |
|----------|----------|----------|----------|----|---|---|----------|----------|----------|
| 516.3618 | 29.98758 | 29.93983 | 29.99667 | 8  | 4 | 4 | 58957.57 | 482685.6 | 75688.61 |
| 652.1722 | 20.44917 | 20.3965  | 20.51167 | 5  | 2 | 3 | 107596.2 | 275002.4 | 374244.9 |
| 557.3031 | 12.43629 | 12.26405 | 12.50992 | 4  | 1 | 3 | 254017.5 | 520822.2 | 1076209  |
| 225.4213 | 9.537367 | 9.534967 | 9.545617 | 3  | 0 | 3 | 5461584  | 5103191  | 10382751 |
| 255.136  | 9.182542 | 9.101033 | 9.2529   | 8  | 5 | 3 | 37120424 | 67243655 | 99999296 |
| 316.9759 | 16.943   | 16.893   | 16.96783 | 8  | 3 | 5 | 256277.1 | 1155608  | 1453825  |
| 498.355  | 10.9508  | 10.91052 | 11.0617  | 9  | 4 | 5 | 312687.1 | 886069.4 | 973951.7 |
| 543.2405 | 9.193217 | 9.08515  | 9.2529   | 8  | 5 | 3 | 41129296 | 60422974 | 1.08E+08 |
| 496.0358 | 16.68517 | 16.63858 | 16.715   | 6  | 2 | 4 | 246707.6 | 867155   | 1599972  |
| 461.0931 | 18.11058 | 18.07617 | 18.16983 | 4  | 1 | 3 | 88062.19 | 214932.5 | 411014.5 |
| 272.1919 | 14.48628 | 14.4441  | 14.61075 | 5  | 2 | 3 | 71724.23 | 452981.9 | 521073.6 |
| 384.3476 | 35.15392 | 35.11767 | 35.17633 | 4  | 1 | 3 | 51171.22 | 207100.4 | 125026   |
| 465.3365 | 26.4735  | 26.416   | 26.5035  | 5  | 2 | 3 | 30636.12 | 89854.69 | 81159.62 |
| 507.2456 | 20.4375  | 20.3965  | 20.588   | 7  | 3 | 4 | 111389.8 | 346579.8 | 441029.1 |
| 292.1912 | 21.008   | 20.93367 | 21.04283 | 5  | 3 | 2 | 64061.73 | 169825.5 | 53464.25 |
| 690.4652 | 21.66417 | 21.57183 | 21.69633 | 7  | 3 | 4 | 109894.1 | 258343.4 | 325873.8 |
| 534.3564 | 31.21283 | 31.1955  | 31.553   | 5  | 3 | 1 | 82965.52 | 528297.9 | 396945.8 |
| 485.37   | 9.231217 | 9.132617 | 9.280533 | 8  | 5 | 2 | 5170667  | 6894849  | 6272691  |
| 902.4688 | 32.10233 | 32.0735  | 32.14733 | 5  | 2 | 3 | 116134   | 480928.8 | 472065.5 |
| 235.1905 | 13.66915 | 13.50832 | 13.73937 | 5  | 2 | 3 | 32771.14 | 260050.1 | 120543.2 |
| 288.1669 | 11.72017 | 11.68558 | 11.72705 | 5  | 2 | 3 | 150031.9 | 302551.9 | 296868.2 |
| 594.3718 | 22.73833 | 22.71633 | 22.79867 | 7  | 3 | 4 | 439495.5 | 950751.2 | 1666435  |
| 271.2828 | 38.75325 | 38.733   | 38.7795  | 6  | 4 | 2 | 121581.1 | 341602.9 | 292870.8 |
| 359.2586 | 26.13067 | 26.0805  | 26.205   | 7  | 4 | 3 | 101353.2 | 279671.4 | 295464.2 |
| 692.4592 | 33.31783 | 33.29417 | 33.33533 | 6  | 2 | 4 | 247757.2 | 2326238  | 2329941  |
| 624.7773 | 30.27317 | 30.2605  | 30.34733 | 5  | 2 | 3 | 82028.44 | 119323.7 | 200415.5 |
| 760.0563 | 18.10342 | 18.07617 | 18.14    | 4  | 1 | 3 | 96230.37 | 193346.2 | 336028.8 |
| 368.3527 | 39.70683 | 39.6695  | 39.922   | 10 | 5 | 5 | 73116.95 | 500952.3 | 250770.1 |
| 492.3092 | 26.32733 | 26.30517 | 26.40217 | 9  | 5 | 4 | 237858.8 | 1022746  | 1029172  |
| 378.3161 | 28.08075 | 28.018   | 28.11733 | 6  | 2 | 4 | 74509.45 | 371012.4 | 419610.7 |
| 654.3327 | 41.19333 | 41.16333 | 41.23617 | 10 | 5 | 5 | 30295118 | 1.9E+08  | 1.3E+08  |
| 400.362  | 27.31225 | 27.25033 | 27.3635  | 10 | 5 | 5 | 817585.6 | 3173530  | 3524986  |
| 472.3329 | 9.2076   | 9.101033 | 9.3228   | 7  | 5 | 2 | 4007591  | 15015441 | 19737887 |
| 340.285  | 31.55567 | 31.47383 | 31.63033 | 9  | 5 | 4 | 328322.6 | 933817.5 | 1045325  |
| 414.9912 | 18.1585  | 18.1395  | 18.17483 | 3  | 3 | 0 | 43139.31 | 155390.7 | 107177.3 |
| 714.1752 | 32.16492 | 32.0855  | 32.22133 | 4  | 1 | 3 | 150341.8 | 494286.3 | 318329.7 |
| 927.6649 | 9.83015  | 9.807617 | 9.862433 | 6  | 3 | 3 | 4134444  | 5014294  | 7685774  |
| 562.373  | 33.965   | 33.93567 | 33.995   | 9  | 4 | 5 | 131685   | 830061.6 | 711262.2 |
| 426.2773 | 8.793992 | 8.551733 | 8.892017 | 6  | 4 | 2 | 242108.8 | 501690.2 | 367735.3 |
| 182.1539 | 9.173983 | 9.08515  | 9.243133 | 3  | 3 | 0 | 2444396  | 6548616  | 4847422  |
| 517.3163 | 36.62    | 36.59217 | 36.68117 | 8  | 3 | 5 | 87979.99 | 425872.3 | 321451   |
| 450.9778 | 14.96775 | 14.93573 | 14.9924  | 5  | 1 | 4 | 89641.52 | 257823.9 | 551402.9 |
| 450.0561 | 32.14983 | 32.088   | 32.21817 | 7  | 2 | 5 | 106333.3 | 293537   | 478753.1 |
| 278.1214 | 20.79108 | 20.75867 | 20.8175  | 6  | 2 | 4 | 52290.89 | 146903.7 | 175030.7 |
| 417.2188 | 21.52033 | 21.47633 | 21.551   | 5  | 2 | 3 | 99870.17 | 255380.1 | 224480.9 |
| 481.2619 | 8.972633 | 8.78305  | 9.031133 | 8  | 4 | 4 | 1906368  | 4981632  | 5307019  |
| 403.2961 | 22.46875 | 22.42483 | 22.4975  | 8  | 3 | 5 | 671256.4 | 1566680  | 2547839  |

|          |          |          |          |    |   |   |          |          |          |
|----------|----------|----------|----------|----|---|---|----------|----------|----------|
| 647.1756 | 30.41183 | 30.36167 | 30.4275  | 7  | 3 | 4 | 93381.93 | 385033   | 454480.1 |
| 811.0764 | 22.98917 | 22.928   | 23.01883 | 7  | 3 | 4 | 703906.4 | 2198171  | 2985600  |
| 351.275  | 22.48867 | 22.4575  | 22.51933 | 5  | 2 | 3 | 58274.46 | 150786.6 | 181083.1 |
| 571.3001 | 29.19917 | 29.16983 | 29.28517 | 7  | 3 | 4 | 1390981  | 4838005  | 6291128  |
| 273.1682 | 9.321717 | 9.210417 | 9.427233 | 7  | 2 | 4 | 7266538  | 14170953 | 21656345 |
| 416.2969 | 18.93867 | 18.90983 | 18.96767 | 10 | 5 | 5 | 1412853  | 4731609  | 6071852  |
| 418.1401 | 20.97258 | 20.91917 | 21.01983 | 8  | 3 | 5 | 781531.2 | 4930960  | 6518464  |
| 522.3559 | 32.11683 | 32.07183 | 32.20817 | 10 | 5 | 5 | 56350200 | 3.61E+08 | 3.44E+08 |
| 416.2154 | 23.17633 | 23.10367 | 23.20917 | 10 | 5 | 5 | 3512601  | 18418999 | 15015077 |
| 385.2928 | 39.54983 | 39.48567 | 39.56533 | 5  | 2 | 3 | 42318.99 | 172057.7 | 161106.3 |
| 233.2267 | 29.68083 | 29.57867 | 29.72383 | 5  | 2 | 3 | 91219.73 | 526532.2 | 435475.3 |
| 570.3557 | 31.54008 | 31.48917 | 31.586   | 4  | 3 | 1 | 1664152  | 8390689  | 8424403  |
| 455.3502 | 9.193308 | 9.101033 | 9.280533 | 8  | 5 | 3 | 2.06E+08 | 4.55E+08 | 3.35E+08 |
| 321.1724 | 11.02247 | 10.97798 | 11.04118 | 6  | 2 | 4 | 463205.1 | 1227450  | 2061678  |
| 674.4702 | 26.7375  | 26.6765  | 26.7595  | 9  | 4 | 5 | 191939.2 | 732750.6 | 869724.8 |
| 410.3113 | 29.38767 | 29.33233 | 29.395   | 5  | 3 | 2 | 60060.87 | 187289.8 | 235697.5 |
| 354.1497 | 15.52753 | 15.48072 | 15.57203 | 5  | 3 | 2 | 31303.75 | 86100.06 | 60358.45 |
| 326.325  | 31.41492 | 31.35767 | 31.4565  | 8  | 4 | 4 | 145696.5 | 845758.8 | 897862.4 |
| 420.3671 | 27.62083 | 27.594   | 27.708   | 10 | 5 | 5 | 320248.1 | 1178894  | 1301454  |
| 409.2015 | 10.57492 | 10.55548 | 10.62195 | 6  | 2 | 4 | 4964292  | 4956205  | 7834997  |
| 207.0319 | 11.06623 | 10.86645 | 11.07922 | 3  | 0 | 3 | 64465.84 | 193509.6 | 288697.5 |
| 570.38   | 28.1455  | 28.04433 | 28.16133 | 9  | 4 | 5 | 1453378  | 4819812  | 6429443  |
| 308.2974 | 23.04808 | 22.97417 | 23.074   | 10 | 5 | 5 | 838757.2 | 3670459  | 4058850  |
| 191.1069 | 16.85267 | 16.73383 | 16.8995  | 9  | 4 | 5 | 220386.9 | 1771160  | 1755542  |
| 302.7654 | 27.94067 | 27.88167 | 28.00783 | 7  | 3 | 4 | 24519.75 | 96520.86 | 79774.43 |
| 427.0076 | 22.11867 | 22.107   | 22.12983 | 3  | 3 | 0 | 38631.33 | 187642.9 | 110762.4 |
| 469.3284 | 9.804217 | 9.763    | 9.806633 | 3  | 3 | 0 | 198812.2 | 448027.5 | 561287.2 |
| 475.8278 | 9.837283 | 9.763683 | 9.862433 | 5  | 3 | 2 | 1241518  | 1455579  | 2295887  |
| 288.2812 | 25.0265  | 24.9975  | 25.053   | 5  | 2 | 3 | 52263.59 | 133066.4 | 155810.8 |
| 743.2222 | 25.68575 | 25.64683 | 25.71517 | 4  | 1 | 3 | 128044.7 | 139894.7 | 312814.1 |
| 718.4966 | 26.74417 | 26.69167 | 26.78117 | 9  | 4 | 5 | 132676.3 | 484815.3 | 581582.8 |
| 455.8284 | 33.93425 | 33.93033 | 34.03617 | 4  | 1 | 3 | 138547.5 | 432765.8 | 571438.7 |
| 948.5913 | 43.61592 | 43.53283 | 43.6335  | 10 | 5 | 5 | 288094.9 | 2518629  | 461318   |
| 408.1363 | 22.51733 | 22.441   | 22.56233 | 7  | 3 | 4 | 77198.14 | 228500.7 | 253056.8 |
| 233.0786 | 10.12311 | 9.932383 | 10.14115 | 4  | 3 | 1 | 324032.4 | 757989   | 1382705  |
| 288.6884 | 8.7798   | 8.533633 | 8.8441   | 5  | 3 | 2 | 193038.7 | 216067.2 | 303026.5 |
| 583.0763 | 42.144   | 42.12433 | 42.21883 | 5  | 3 | 2 | 44762.85 | 362121.5 | 69613.51 |
| 452.3224 | 27.94067 | 27.85217 | 27.97717 | 7  | 3 | 4 | 201307.4 | 1203473  | 842559.4 |
| 503.1794 | 10.73612 | 10.64782 | 10.80753 | 5  | 2 | 3 | 480586.1 | 1138125  | 1925922  |
| 400.3542 | 20.51158 | 20.48283 | 20.64567 | 10 | 5 | 5 | 209242.8 | 759507.6 | 783119.2 |
| 193.1386 | 8.88125  | 8.7127   | 8.9755   | 6  | 2 | 4 | 251385.6 | 526470.8 | 327580.4 |
| 537.005  | 30.80633 | 30.74767 | 30.83533 | 3  | 0 | 3 | 103667.5 | 438020.6 | 763306.4 |
| 500.3711 | 29.62267 | 29.57833 | 29.681   | 5  | 3 | 2 | 102018.9 | 324549.2 | 297855.9 |
| 340.6815 | 10.87918 | 10.87913 | 10.92662 | 3  | 0 | 3 | 199642.4 | 250382.1 | 391500   |
| 284.0779 | 19.76008 | 19.744   | 19.8525  | 10 | 5 | 5 | 128184.9 | 587555.8 | 616932.3 |
| 519.0335 | 42.59217 | 42.578   | 42.65883 | 4  | 3 | 1 | 41943.16 | 255079.5 | 51810.83 |
| 519.3281 | 27.1075  | 27.08917 | 27.15783 | 6  | 3 | 3 | 153470.7 | 722880.6 | 613930.7 |

|          |          |          |          |    |   |   |          |          |          |
|----------|----------|----------|----------|----|---|---|----------|----------|----------|
| 709.1827 | 30.95817 | 30.90517 | 30.96717 | 3  | 3 | 0 | 62426.09 | 229008.4 | 99382.85 |
| 371.719  | 9.5393   | 9.473767 | 9.596683 | 8  | 5 | 3 | 7689798  | 25818275 | 21395266 |
| 475.3361 | 7.4501   | 7.3532   | 7.670483 | 7  | 2 | 4 | 1.74E+09 | 6.48E+09 | 1.2E+10  |
| 452.2779 | 26.52583 | 26.49467 | 26.56233 | 4  | 3 | 1 | 77221.93 | 255533.1 | 225918.1 |
| 526.2935 | 28.36908 | 28.32717 | 28.47817 | 10 | 5 | 5 | 1917333  | 7346471  | 8975476  |
| 494.3247 | 27.45958 | 27.427   | 27.53083 | 10 | 5 | 5 | 14321549 | 1.11E+08 | 1.12E+08 |
| 473.3783 | 20.18733 | 20.16467 | 20.374   | 5  | 2 | 3 | 35468.43 | 107787   | 127021.3 |
| 439.222  | 10.41848 | 10.33325 | 10.65043 | 11 | 5 | 5 | 4785167  | 15654271 | 20638717 |
| 706.3298 | 23.13667 | 23.08917 | 23.20917 | 7  | 3 | 4 | 81061.95 | 196101.9 | 204133   |
| 453.8664 | 9.445533 | 9.168467 | 9.47815  | 4  | 1 | 3 | 4187805  | 4918070  | 7323192  |
| 214.1804 | 23.28875 | 23.25383 | 23.353   | 10 | 5 | 5 | 3687449  | 18356928 | 18795199 |
| 491.3426 | 28.3465  | 28.32217 | 28.39117 | 4  | 3 | 1 | 40214.89 | 85643.58 | 48223.56 |
| 227.1838 | 13.02208 | 12.97682 | 13.12275 | 9  | 4 | 5 | 287819.6 | 1197164  | 838803.7 |
| 527.4178 | 20.305   | 20.29517 | 20.49967 | 5  | 2 | 3 | 49696.61 | 102279.5 | 125313.6 |
| 673.1436 | 32.13283 | 32.088   | 32.146   | 4  | 1 | 3 | 99764.3  | 145608.4 | 323824.4 |
| 302.0688 | 22.64983 | 22.57133 | 22.68083 | 7  | 3 | 4 | 66364.48 | 251793.8 | 261800.8 |
| 776.4544 | 32.13425 | 32.12933 | 32.176   | 8  | 3 | 5 | 553463.6 | 1599961  | 2174782  |
| 300.7007 | 8.868067 | 8.677417 | 8.96155  | 9  | 5 | 4 | 748106.9 | 2252091  | 1811661  |
| 213.6802 | 9.512733 | 9.44975  | 9.572217 | 6  | 3 | 3 | 1712042  | 3533202  | 3623305  |
| 285.0666 | 18.11592 | 18.05717 | 18.19983 | 8  | 4 | 4 | 987920.8 | 2871385  | 5469806  |
| 412.1578 | 20.64217 | 20.61367 | 20.7355  | 5  | 2 | 3 | 3829608  | 16252597 | 21306937 |
| 224.0574 | 13.60817 | 13.46225 | 13.76545 | 5  | 2 | 3 | 124295.8 | 691186   | 1115910  |
| 340.0274 | 14.68537 | 14.6596  | 14.71452 | 5  | 1 | 4 | 77371.05 | 272116.3 | 475810   |
| 415.1209 | 26.64758 | 26.63517 | 26.67933 | 6  | 2 | 4 | 115789.5 | 402419.7 | 493101.9 |
| 451.1891 | 20.64217 | 20.628   | 20.74433 | 7  | 3 | 4 | 413776.7 | 1728066  | 2246770  |
| 369.185  | 38.13483 | 38.1125  | 38.21533 | 7  | 2 | 5 | 82583.85 | 342368.3 | 242130.7 |
| 203.626  | 9.51595  | 9.506667 | 9.537367 | 4  | 1 | 3 | 4590520  | 7199209  | 9410077  |
| 688.211  | 30.94008 | 30.91983 | 30.96167 | 4  | 4 | 0 | 181308.3 | 515874.9 | 239610.9 |
| 348.1882 | 16.15892 | 16.1215  | 16.20503 | 7  | 3 | 4 | 91734.34 | 457022.3 | 354103.6 |
| 497.1842 | 21.68783 | 21.57183 | 21.72217 | 6  | 1 | 5 | 113415   | 343771.6 | 416353.3 |
| 305.8466 | 27.92492 | 27.88133 | 27.96933 | 6  | 2 | 4 | 22898.09 | 65748.23 | 82465.81 |
| 426.3218 | 35.055   | 35.02933 | 35.32417 | 11 | 5 | 5 | 210760.3 | 852389.8 | 665437.5 |
| 408.1238 | 27.12692 | 27.07317 | 27.17217 | 6  | 2 | 4 | 306431.7 | 679711.3 | 1053501  |
| 299.111  | 11.49257 | 11.43633 | 11.5928  | 5  | 3 | 2 | 210322.9 | 361350.1 | 535666.8 |
| 274.5216 | 32.4975  | 32.37967 | 32.53617 | 7  | 3 | 4 | 51181.04 | 232747.3 | 287562.8 |
| 498.3644 | 26.60617 | 26.54567 | 26.6345  | 9  | 4 | 5 | 130567.8 | 482116.9 | 587336.9 |
| 392.2082 | 11.29537 | 11.28345 | 11.51602 | 5  | 1 | 4 | 148664.9 | 591326.4 | 468320.4 |
| 478.3488 | 9.188767 | 9.101033 | 9.459367 | 8  | 5 | 3 | 4030053  | 18756165 | 20551536 |
| 552.4168 | 16.98783 | 16.9155  | 16.991   | 3  | 0 | 3 | 33694.94 | 59419.2  | 63949.72 |
| 353.1732 | 15.64568 | 15.59763 | 15.7074  | 9  | 5 | 4 | 98442.76 | 521770.1 | 541909.5 |
| 302.1393 | 26.91167 | 26.8155  | 26.9455  | 6  | 3 | 3 | 46699.85 | 136612.3 | 147214   |
| 613.3423 | 9.177425 | 9.116917 | 9.2529   | 6  | 3 | 3 | 2595968  | 5645947  | 7774569  |
| 464.3352 | 9.82     | 9.503117 | 9.862433 | 10 | 5 | 5 | 6084281  | 10252308 | 16662099 |
| 525.2883 | 9.0414   | 8.9037   | 9.100467 | 5  | 4 | 1 | 2937071  | 6713062  | 7629354  |
| 270.1004 | 25.68433 | 25.63383 | 25.69883 | 8  | 3 | 5 | 256187.8 | 662442.4 | 1048975  |
| 280.0987 | 18.1235  | 18.089   | 18.158   | 7  | 3 | 4 | 124171.9 | 526613.3 | 607456   |
| 474.2813 | 33.86    | 33.76867 | 33.877   | 6  | 3 | 3 | 108836.2 | 509856   | 447129.3 |

|          |          |          |          |    |   |   |          |          |          |
|----------|----------|----------|----------|----|---|---|----------|----------|----------|
| 344.311  | 9.550108 | 9.463983 | 9.584433 | 6  | 3 | 3 | 3023892  | 7631605  | 8357026  |
| 650.1013 | 10.7506  | 10.60763 | 10.80753 | 5  | 1 | 3 | 1242477  | 1960776  | 4099868  |
| 271.0752 | 13.66674 | 13.44668 | 13.75177 | 6  | 1 | 4 | 92887.38 | 603953.4 | 888083.8 |
| 842.5348 | 9.777783 | 9.76325  | 9.805317 | 5  | 2 | 3 | 327286.6 | 354214.5 | 661097   |
| 672.2459 | 25.716   | 25.66283 | 25.73317 | 10 | 5 | 5 | 524309.9 | 2219366  | 2490165  |
| 227.201  | 21.16317 | 21.08233 | 21.19667 | 5  | 2 | 3 | 504673.3 | 2966158  | 2618740  |
| 497.4073 | 20.3935  | 20.353   | 20.52567 | 5  | 2 | 3 | 50655.61 | 161724.3 | 191717   |
| 369.9879 | 13.6964  | 13.49057 | 13.76545 | 5  | 1 | 3 | 162788.1 | 804195.5 | 1738235  |
| 368.2799 | 25.16542 | 25.14933 | 25.18617 | 4  | 3 | 1 | 80211.01 | 262596.3 | 360429   |
| 326.2811 | 9.236417 | 9.101033 | 9.565117 | 9  | 5 | 2 | 66844236 | 1.71E+08 | 1.26E+08 |
| 385.1531 | 33.15717 | 33.125   | 33.15733 | 3  | 0 | 3 | 94977.73 | 552273.4 | 430534.1 |
| 672.2454 | 27.73108 | 27.66933 | 27.7375  | 8  | 4 | 4 | 256690.5 | 1634660  | 1784876  |
| 292.1924 | 8.894433 | 8.730367 | 8.96155  | 7  | 4 | 3 | 799704.3 | 1148732  | 980657   |
| 592.7987 | 10.68095 | 10.599   | 10.75237 | 8  | 3 | 5 | 3686336  | 7189307  | 14697505 |
| 750.0979 | 20.45075 | 20.397   | 20.51167 | 4  | 1 | 3 | 69311.41 | 167689.3 | 260242.5 |
| 356.2285 | 28.71833 | 28.681   | 28.74433 | 4  | 3 | 1 | 49491    | 147381.8 | 134528.7 |
| 203.107  | 28.14617 | 28.05933 | 28.16833 | 10 | 5 | 5 | 1429078  | 8785383  | 9157289  |
| 454.1878 | 20.64217 | 20.58967 | 20.7355  | 9  | 4 | 5 | 2128861  | 8738618  | 11624251 |
| 367.0974 | 27.13417 | 27.08717 | 27.15767 | 6  | 2 | 4 | 370167.2 | 840300.9 | 1353144  |
| 559.3002 | 29.18317 | 29.14083 | 29.2705  | 7  | 3 | 4 | 585998.6 | 1763875  | 2276516  |
| 432.2385 | 23.17633 | 23.10367 | 23.20917 | 10 | 5 | 5 | 18036434 | 93779460 | 76170862 |
| 642.4801 | 21.3395  | 21.261   | 21.39333 | 8  | 3 | 5 | 244315.5 | 890377.6 | 1128171  |
| 777.4579 | 32.13192 | 32.12167 | 32.146   | 6  | 2 | 4 | 243711.8 | 630511.4 | 866722.3 |
| 421.2331 | 29.65158 | 29.57833 | 29.6665  | 10 | 5 | 5 | 1385753  | 6966602  | 6822063  |
| 339.3017 | 20.496   | 20.469   | 20.6345  | 5  | 2 | 3 | 37880.36 | 105482.1 | 120866.5 |
| 381.3119 | 29.941   | 29.90933 | 29.97217 | 9  | 5 | 4 | 87238.06 | 434084.4 | 408015.7 |
| 535.3387 | 16.47889 | 16.44078 | 16.49852 | 8  | 3 | 5 | 197720   | 930650.3 | 836899.8 |
| 412.143  | 23.84167 | 23.7885  | 23.87067 | 5  | 2 | 3 | 58474.41 | 106814.3 | 142397.3 |
| 929.6711 | 9.835583 | 9.823017 | 9.862433 | 4  | 1 | 3 | 506887.2 | 600082   | 943841   |
| 366.2858 | 26.293   | 26.23883 | 26.32733 | 5  | 2 | 3 | 44742.23 | 69561.69 | 89408.93 |
| 454.9346 | 16.94367 | 16.8785  | 16.97683 | 3  | 0 | 3 | 55007.23 | 118237.1 | 241796.8 |
| 449.0789 | 21.69708 | 21.57183 | 21.74217 | 8  | 3 | 5 | 93583.41 | 330333.4 | 377773.7 |
| 371.0312 | 27.882   | 27.81883 | 27.89517 | 5  | 2 | 3 | 205048.3 | 664071   | 893124.1 |
| 499.1509 | 18.27833 | 18.2235  | 18.302   | 9  | 5 | 4 | 394080   | 1539825  | 1665296  |
| 416.1888 | 23.88208 | 23.8565  | 23.88533 | 6  | 1 | 5 | 262612.8 | 1357787  | 1313788  |
| 747.4119 | 10.67897 | 10.62147 | 10.77118 | 9  | 4 | 5 | 17492666 | 33378019 | 46749818 |
| 483.3515 | 24.25417 | 24.12583 | 24.28383 | 7  | 3 | 4 | 85305.88 | 340324.2 | 417251   |
| 510.4309 | 33.34133 | 33.2945  | 33.37067 | 8  | 3 | 5 | 721783.7 | 2169010  | 2287641  |
| 483.1116 | 18.1005  | 18.089   | 18.158   | 6  | 3 | 3 | 259894.3 | 730144   | 1234357  |
| 597.2478 | 26.86917 | 26.81367 | 26.919   | 8  | 3 | 5 | 172828   | 565152   | 737853.3 |
| 408.1325 | 21.02792 | 20.98867 | 21.0505  | 4  | 1 | 3 | 123705.1 | 339950.7 | 488860.5 |
| 565.014  | 18.10333 | 18.07617 | 18.155   | 4  | 1 | 3 | 87635.1  | 210529.7 | 341827.4 |
| 433.3151 | 20.43342 | 20.3965  | 20.59983 | 8  | 3 | 5 | 102176.4 | 425452.5 | 413165.5 |
| 809.384  | 10.69325 | 10.64867 | 10.75237 | 7  | 3 | 4 | 806737.2 | 1258758  | 976827   |
| 286.2381 | 30.21917 | 30.11917 | 30.25217 | 5  | 2 | 3 | 51192.68 | 212627.9 | 127655.2 |
| 377.089  | 30.40383 | 30.36167 | 30.48833 | 4  | 1 | 3 | 581311.6 | 1561116  | 3208467  |
| 352.27   | 24.95242 | 24.907   | 24.97983 | 8  | 4 | 4 | 339170   | 1221481  | 1896256  |

|          |          |          |          |    |   |   |          |          |          |
|----------|----------|----------|----------|----|---|---|----------|----------|----------|
| 344.1052 | 27.20108 | 27.11533 | 27.22933 | 6  | 3 | 3 | 67855.27 | 175860.3 | 191157.8 |
| 397.2161 | 43.59542 | 43.57217 | 43.61617 | 10 | 5 | 5 | 999530.3 | 7588210  | 7932238  |
| 473.325  | 9.152625 | 9.004633 | 9.250667 | 4  | 3 | 1 | 1382317  | 4892354  | 5765276  |
| 319.2272 | 28.70358 | 28.63667 | 28.73267 | 4  | 3 | 1 | 394740.9 | 1573324  | 1885951  |
| 251.1259 | 14.4294  | 14.40428 | 14.50782 | 5  | 2 | 3 | 213945.3 | 1146215  | 1575980  |
| 393.8302 | 22.9685  | 22.95767 | 23.01033 | 5  | 3 | 2 | 47364.34 | 130778.5 | 191335.3 |
| 369.1359 | 20.65483 | 20.62817 | 20.687   | 5  | 2 | 3 | 115913.8 | 375464.5 | 473231.3 |
| 550.3173 | 32.12417 | 32.10017 | 32.2235  | 6  | 3 | 3 | 353484.8 | 718590.2 | 639672.3 |
| 222.1209 | 28.14217 | 28.05933 | 28.16833 | 10 | 5 | 5 | 1160817  | 6426304  | 6848164  |
| 249.1853 | 26.81917 | 26.77933 | 26.87017 | 5  | 2 | 3 | 701371.1 | 2437319  | 3438721  |
| 425.3014 | 10.42169 | 10.3779  | 10.45412 | 6  | 3 | 3 | 3471129  | 6890886  | 13654537 |
| 401.3381 | 21.404   | 21.3425  | 21.49367 | 10 | 5 | 5 | 279846.6 | 972342.8 | 1089789  |
| 248.2012 | 27.637   | 27.61883 | 27.6465  | 5  | 2 | 3 | 36090.55 | 114525.1 | 128622.4 |
| 293.0391 | 28.16133 | 28.05933 | 28.162   | 6  | 3 | 3 | 35348.3  | 141548.6 | 175471.1 |
| 542.0567 | 21.72567 | 21.708   | 21.7505  | 5  | 2 | 3 | 101284.8 | 287152.7 | 402422.9 |
| 279.115  | 30.76792 | 30.69017 | 30.8785  | 4  | 1 | 3 | 766936.2 | 1640367  | 2230070  |
| 896.4375 | 10.68813 | 10.67897 | 10.69392 | 4  | 1 | 3 | 4416022  | 7872332  | 16313442 |
| 200.2012 | 26.16958 | 26.1     | 26.21033 | 10 | 5 | 5 | 1195901  | 3401690  | 4076613  |
| 414.3011 | 20.42042 | 20.3615  | 20.588   | 10 | 5 | 5 | 364845.3 | 1500399  | 1450076  |
| 240.1211 | 16.79533 | 16.69033 | 16.82267 | 7  | 3 | 4 | 130437   | 737139   | 847453.7 |
| 520.3405 | 28.29283 | 28.24783 | 28.38817 | 9  | 4 | 5 | 3248128  | 16332498 | 15963615 |
| 195.1383 | 11.18057 | 11.04118 | 11.51602 | 9  | 4 | 5 | 460770.8 | 4553597  | 5560414  |
| 585.4965 | 30.16133 | 30.12883 | 30.24717 | 10 | 5 | 5 | 265620.7 | 1302982  | 1019670  |
| 521.3441 | 29.12492 | 29.09717 | 29.22633 | 10 | 5 | 5 | 6422739  | 27662310 | 25176835 |
| 351.0997 | 30.45633 | 30.36683 | 30.52667 | 8  | 5 | 3 | 284234.1 | 1239077  | 747253.8 |
| 335.1673 | 40.69183 | 40.65783 | 40.71283 | 6  | 2 | 4 | 43976.58 | 364271.9 | 164911.1 |
| 649.417  | 10.85045 | 10.81753 | 10.95503 | 9  | 4 | 5 | 77138200 | 1.13E+08 | 1.75E+08 |
| 469.3281 | 19.70317 | 19.67617 | 19.8175  | 10 | 5 | 5 | 263837.8 | 913755.2 | 1009211  |
| 432.3783 | 24.5995  | 24.56467 | 24.63383 | 10 | 5 | 5 | 578426.5 | 2768105  | 3247324  |
| 895.4342 | 10.69263 | 10.6789  | 10.69392 | 5  | 2 | 3 | 8323920  | 15787520 | 32778812 |
| 315.1598 | 16.28199 | 16.24337 | 16.30538 | 8  | 3 | 5 | 71767.56 | 296756.8 | 278344   |
| 252.1597 | 31.31433 | 31.216   | 31.32617 | 7  | 3 | 4 | 112028.2 | 318006.5 | 306061.6 |
| 436.2574 | 26.45208 | 26.41383 | 26.47833 | 8  | 5 | 3 | 1304169  | 3791915  | 4735676  |
| 610.4534 | 29.347   | 29.32983 | 29.41717 | 4  | 1 | 3 | 42808.32 | 208736.7 | 235237.8 |
| 647.4379 | 29.88525 | 29.871   | 29.90883 | 10 | 5 | 5 | 96981.51 | 820084.4 | 160657.8 |
| 352.2207 | 26.57092 | 26.531   | 26.62083 | 4  | 0 | 4 | 122082.5 | 554802.6 | 230786.2 |
| 273.1153 | 32.13042 | 32.0295  | 32.14983 | 6  | 1 | 5 | 60725.8  | 162667   | 243001   |
| 407.1354 | 21.02133 | 20.96633 | 21.03783 | 5  | 1 | 4 | 88614.27 | 332691.5 | 468415.1 |
| 278.0672 | 29.63642 | 29.52033 | 29.66617 | 8  | 4 | 4 | 224669.8 | 967284.3 | 1037071  |
| 586.4168 | 29.34733 | 29.33233 | 29.3605  | 5  | 2 | 3 | 72848.1  | 244468   | 277620.6 |
| 242.2845 | 27.472   | 27.42867 | 27.58117 | 9  | 4 | 5 | 245128.7 | 968825.3 | 873304.9 |
| 651.4236 | 10.8426  | 10.78832 | 10.86975 | 8  | 4 | 4 | 4729004  | 6165779  | 9608283  |
| 316.285  | 22.762   | 22.67817 | 22.79733 | 6  | 2 | 4 | 67973.95 | 250874.5 | 267444.9 |
| 229.1995 | 15.95405 | 15.75162 | 16.07195 | 7  | 2 | 3 | 378024.8 | 3518980  | 4726805  |
| 389.2522 | 10.55748 | 10.5346  | 10.56898 | 5  | 2 | 3 | 1091974  | 4643426  | 5716803  |
| 593.0456 | 22.1355  | 22.12217 | 22.1715  | 5  | 2 | 3 | 96126.89 | 245659.4 | 391652.3 |
| 423.2719 | 40.30983 | 40.25067 | 40.3475  | 7  | 3 | 4 | 92607.23 | 473478   | 459346.5 |

|          |          |          |          |    |   |   |          |          |          |
|----------|----------|----------|----------|----|---|---|----------|----------|----------|
| 364.1835 | 43.602   | 43.53283 | 43.6335  | 7  | 4 | 3 | 130256.2 | 1215510  | 495272.3 |
| 743.5173 | 34.39567 | 34.34333 | 34.408   | 5  | 2 | 3 | 65559.53 | 193359.4 | 279028.7 |
| 259.1656 | 22.75367 | 22.70783 | 22.78383 | 10 | 5 | 5 | 5471250  | 26817752 | 29536486 |
| 498.119  | 26.63917 | 26.531   | 26.68133 | 7  | 3 | 4 | 124392.7 | 509666.2 | 605489.6 |
| 459.1669 | 20.65367 | 20.61367 | 20.7265  | 8  | 3 | 5 | 502896.7 | 1964400  | 2505668  |
| 231.1941 | 11.93243 | 11.89515 | 11.97157 | 4  | 1 | 3 | 71955.63 | 96732.54 | 54268    |
| 498.3792 | 31.47383 | 31.435   | 31.51383 | 9  | 5 | 4 | 274258.7 | 1445847  | 1354753  |
| 571.3834 | 28.14717 | 28.04433 | 28.1765  | 7  | 3 | 4 | 523805.8 | 1599037  | 2165958  |
| 433.2419 | 23.17692 | 23.10367 | 23.20917 | 10 | 5 | 5 | 4732030  | 24369280 | 20118974 |
| 325.2016 | 26.278   | 26.205   | 26.297   | 5  | 2 | 3 | 160493.7 | 885029.6 | 647463.1 |
| 570.3185 | 9.121117 | 9.004633 | 9.169933 | 5  | 3 | 2 | 613131.6 | 1354590  | 1387346  |
| 384.0428 | 22.13475 | 22.0845  | 22.14983 | 10 | 5 | 5 | 150326.8 | 782259.2 | 719859.2 |
| 650.1726 | 20.42575 | 20.39183 | 20.588   | 8  | 3 | 5 | 998011.4 | 2983700  | 4286351  |
| 241.1802 | 16.81675 | 16.76283 | 16.8325  | 6  | 2 | 4 | 170693.5 | 1011564  | 863332.3 |
| 533.2577 | 18.06167 | 18.05717 | 18.11017 | 5  | 2 | 3 | 120855   | 281059.9 | 407580.6 |
| 336.2454 | 20.95983 | 20.91433 | 21.03617 | 6  | 4 | 2 | 128718.3 | 731624.9 | 487253.6 |
| 371.2048 | 12.33628 | 12.32863 | 12.48778 | 5  | 2 | 3 | 138351.4 | 514848.1 | 474672.9 |
| 414.1935 | 33.17183 | 33.15433 | 33.1875  | 4  | 0 | 4 | 66634.61 | 485372.6 | 173326.9 |
| 270.1493 | 26.308   | 26.24733 | 26.32633 | 5  | 2 | 3 | 45042.3  | 116458.6 | 146507   |
| 520.3407 | 29.12492 | 29.09717 | 29.22633 | 10 | 5 | 5 | 21993160 | 98697403 | 88400593 |
| 348.3266 | 24.06133 | 24.0165  | 24.1045  | 8  | 3 | 5 | 526818.1 | 1898681  | 2550290  |
| 666.3951 | 10.87913 | 10.81753 | 10.88395 | 5  | 2 | 3 | 343473.2 | 276960.5 | 420638   |
| 568.3406 | 28.49058 | 28.43717 | 28.568   | 6  | 3 | 3 | 3907616  | 19479737 | 20053290 |
| 436.0048 | 22.99133 | 22.96    | 23.02483 | 5  | 2 | 3 | 63189.14 | 192523.2 | 253545.7 |
| 349.7673 | 9.208    | 9.116917 | 9.278583 | 7  | 5 | 2 | 5402321  | 8959651  | 6868584  |
| 455.0094 | 16.6885  | 16.62375 | 16.7075  | 6  | 2 | 4 | 177748   | 562561.2 | 1066420  |
| 520.3636 | 40.4365  | 40.39167 | 40.45683 | 10 | 5 | 5 | 181110.3 | 1053444  | 750763   |
| 284.0991 | 18.13833 | 18.089   | 18.1585  | 7  | 3 | 4 | 243314.5 | 1105168  | 1364653  |
| 524.3712 | 35.92342 | 35.90967 | 35.966   | 4  | 3 | 1 | 213583.4 | 505003.8 | 372626   |
| 597.4218 | 32.13617 | 32.10233 | 32.14633 | 7  | 3 | 4 | 186676.7 | 658981.9 | 818739.2 |
| 223.1241 | 28.15425 | 28.02967 | 28.176   | 6  | 3 | 3 | 53280.29 | 187892.1 | 99184.88 |
| 348.9672 | 13.71118 | 13.66637 | 13.75177 | 4  | 1 | 3 | 94267.79 | 338827.3 | 667564.9 |
| 292.7477 | 28.13942 | 28.04433 | 28.1765  | 8  | 3 | 5 | 87032.61 | 400879   | 441496   |
| 417.1922 | 23.88408 | 23.82683 | 23.9     | 4  | 1 | 3 | 51481.96 | 106649.4 | 102383.3 |
| 403.3058 | 39.73183 | 39.64917 | 39.80883 | 9  | 5 | 4 | 63690.57 | 476677   | 233862.3 |
| 801.1011 | 22.12567 | 22.05267 | 22.15117 | 6  | 2 | 4 | 297247.5 | 637555.8 | 1168570  |
| 745.1659 | 22.13033 | 22.09783 | 22.1365  | 5  | 2 | 3 | 104708.6 | 196344.4 | 320599.5 |
| 474.606  | 7.507108 | 7.458333 | 7.6215   | 4  | 1 | 3 | 508347.8 | 458176.6 | 639044.8 |
| 446.1456 | 20.7295  | 20.68167 | 20.76733 | 7  | 4 | 3 | 74379.3  | 268263.5 | 250309.5 |
| 571.3595 | 30.26258 | 30.23533 | 30.36167 | 10 | 5 | 5 | 6243880  | 35185090 | 28861221 |
| 241.1781 | 10.9623  | 10.8406  | 11.0843  | 9  | 3 | 4 | 878840.3 | 2191707  | 1805438  |
| 391.2961 | 15.52753 | 15.49798 | 15.55728 | 5  | 2 | 3 | 348033   | 3571541  | 2231298  |
| 659.1287 | 18.1035  | 18.0555  | 18.1585  | 7  | 3 | 4 | 630792.3 | 1679380  | 2935858  |
| 451.3257 | 20.41717 | 20.3615  | 20.588   | 10 | 5 | 5 | 810300.6 | 3266387  | 3199745  |
| 283.0959 | 18.13117 | 18.0555  | 18.1595  | 10 | 5 | 5 | 2482765  | 14279743 | 16832232 |
| 385.1878 | 18.13058 | 18.09117 | 18.155   | 6  | 3 | 3 | 211793.3 | 775591.3 | 915432.7 |
| 620.4242 | 43.60467 | 43.5875  | 43.6335  | 5  | 4 | 1 | 245861.8 | 1635150  | 790069.4 |

|          |          |          |          |    |   |   |          |          |          |
|----------|----------|----------|----------|----|---|---|----------|----------|----------|
| 258.0599 | 19.35067 | 19.30917 | 19.3935  | 7  | 3 | 4 | 90477.72 | 365748.6 | 369636.3 |
| 566.4233 | 30.26775 | 30.23533 | 30.34733 | 8  | 4 | 4 | 66448.8  | 331465.6 | 294585.1 |
| 612.3193 | 20.91967 | 20.85167 | 21.0485  | 5  | 3 | 2 | 83588.09 | 410970.7 | 381397.2 |
| 479.0273 | 23.006   | 22.96    | 23.01883 | 5  | 2 | 3 | 58428.47 | 127138.2 | 177633.5 |
| 306.2512 | 35.02733 | 35.02583 | 35.11767 | 3  | 0 | 3 | 122730   | 603135.4 | 633836.9 |
| 299.1622 | 26.32633 | 26.23883 | 26.38467 | 7  | 4 | 3 | 99469.02 | 283962.6 | 327763.8 |
| 440.1528 | 20.64917 | 20.62817 | 20.687   | 4  | 1 | 3 | 91418.74 | 317167.9 | 332122.8 |
| 586.4173 | 26.68017 | 26.61617 | 26.70833 | 9  | 4 | 5 | 225584   | 988730.9 | 1175153  |
| 416.1915 | 32.11483 | 32.0875  | 32.13233 | 5  | 1 | 4 | 214944.4 | 507380.1 | 810906.5 |
| 267.973  | 19.33775 | 19.29933 | 19.35933 | 6  | 2 | 4 | 200229.4 | 662624.3 | 946162.9 |
| 672.8699 | 16.68867 | 16.66283 | 16.72017 | 4  | 1 | 3 | 56739.71 | 146298.4 | 322527.2 |
| 614.3464 | 9.186383 | 9.1237   | 9.211383 | 5  | 2 | 3 | 724217.8 | 1072295  | 1424239  |
| 815.5936 | 11.49065 | 11.47827 | 11.9058  | 6  | 2 | 3 | 231607.8 | 841221.5 | 979136.8 |
| 398.3272 | 29.48492 | 29.4335  | 29.75333 | 8  | 3 | 4 | 76604.53 | 409074.2 | 327746.6 |
| 522.4388 | 10.04445 | 10.00425 | 10.06338 | 5  | 3 | 2 | 211890.3 | 569227.6 | 909848.3 |
| 378.228  | 29.18217 | 29.149   | 29.228   | 3  | 0 | 3 | 252807.3 | 2265156  | 745656.6 |
| 823.3598 | 10.67897 | 10.599   | 10.75237 | 6  | 2 | 4 | 1054706  | 2725354  | 5390195  |
| 306.3006 | 37.82467 | 37.782   | 37.90067 | 6  | 2 | 4 | 417150.8 | 2286874  | 2334755  |
| 281.1387 | 23.17633 | 23.10367 | 23.20917 | 10 | 5 | 5 | 638290.9 | 3109027  | 2410082  |
| 295.1112 | 22.12492 | 22.05267 | 22.14983 | 10 | 5 | 5 | 18367640 | 76614253 | 1.03E+08 |
| 208.1698 | 12.99297 | 12.9617  | 13.06513 | 7  | 3 | 4 | 116436.9 | 304600.8 | 321449.7 |
| 715.5408 | 25.83742 | 25.80617 | 25.84783 | 4  | 3 | 1 | 71152.95 | 161003.3 | 219478.7 |
| 457.3641 | 22.60683 | 22.48433 | 22.6455  | 9  | 4 | 5 | 302802   | 2743811  | 3089388  |
| 275.6259 | 27.47642 | 27.45867 | 27.546   | 6  | 2 | 4 | 247933.4 | 1457632  | 1963797  |
| 331.0159 | 17.161   | 17.11867 | 17.18083 | 5  | 4 | 1 | 59475.43 | 295130.4 | 147126.4 |
| 651.1758 | 20.44917 | 20.411   | 20.59983 | 7  | 2 | 5 | 274083.1 | 776018.7 | 1109191  |
| 209.1539 | 18.45367 | 18.43167 | 18.50167 | 7  | 3 | 4 | 275924.5 | 1380142  | 1156124  |
| 254.248  | 33.89108 | 33.82933 | 33.90133 | 6  | 4 | 2 | 163398.5 | 754481.4 | 867570.2 |
| 604.1492 | 23.85617 | 23.83917 | 23.88067 | 4  | 1 | 3 | 40608.2  | 68761.56 | 149963.1 |
| 550.3881 | 25.27117 | 25.19483 | 25.30433 | 5  | 2 | 3 | 91012.19 | 259847.7 | 350447.5 |
| 445.3139 | 28.76483 | 28.74617 | 28.97633 | 7  | 2 | 4 | 144325.3 | 528979.5 | 623907   |
| 260.6395 | 9.196767 | 9.101033 | 9.250667 | 6  | 5 | 1 | 1080307  | 2563894  | 2166920  |
| 383.593  | 23.282   | 23.25383 | 23.3685  | 9  | 4 | 5 | 89039.97 | 393882.8 | 432443.6 |
| 456.188  | 20.98442 | 20.963   | 21.0485  | 6  | 2 | 4 | 444036.7 | 2326807  | 2970350  |
| 582.4587 | 25.78433 | 25.779   | 25.8335  | 3  | 0 | 3 | 153060.5 | 429231.7 | 551792.9 |
| 339.2017 | 17.196   | 17.19467 | 17.2225  | 3  | 0 | 3 | 44741.93 | 93971.72 | 105940.7 |
| 504.2417 | 20.42242 | 20.3615  | 20.588   | 10 | 5 | 5 | 2351062  | 9115061  | 11668699 |
| 451.3305 | 9.186383 | 9.163733 | 9.446567 | 5  | 3 | 2 | 7513665  | 6417183  | 7687044  |
| 372.101  | 42.74125 | 42.67917 | 42.7635  | 10 | 5 | 5 | 159278   | 1088228  | 542581.6 |
| 405.2638 | 38.10258 | 38.0825  | 38.12717 | 6  | 3 | 3 | 89977.19 | 522931.9 | 447365.3 |
| 208.0793 | 21.02017 | 20.95533 | 21.05783 | 9  | 4 | 5 | 141017.9 | 507228.1 | 564143.4 |
| 597.1198 | 20.64242 | 20.628   | 20.7015  | 6  | 2 | 4 | 218868.3 | 860977.1 | 1241519  |
| 727.5271 | 23.45133 | 23.34133 | 23.62017 | 6  | 3 | 2 | 1271331  | 881550.4 | 1306237  |
| 314.9805 | 16.943   | 16.893   | 16.96167 | 10 | 5 | 5 | 797019.2 | 3888312  | 5051694  |
| 695.5585 | 27.29342 | 27.2355  | 27.36317 | 6  | 2 | 4 | 93129.61 | 390962.1 | 515297.7 |
| 285.1855 | 24.83867 | 24.81333 | 24.88817 | 8  | 4 | 4 | 769987.6 | 3109079  | 3983984  |
| 284.2953 | 27.44817 | 27.42817 | 27.4705  | 5  | 3 | 2 | 60560.72 | 252893.5 | 249014.8 |



|          |          |          |          |    |   |   |          |          |          |
|----------|----------|----------|----------|----|---|---|----------|----------|----------|
| 296.1945 | 19.81717 | 19.802   | 19.92167 | 6  | 3 | 3 | 80143.95 | 318747   | 338375.4 |
| 254.0844 | 22.12492 | 22.05267 | 22.14983 | 10 | 5 | 5 | 17334626 | 70157325 | 95778275 |
| 304.285  | 22.77583 | 22.73733 | 22.79817 | 10 | 5 | 5 | 5382024  | 17190587 | 21079996 |
| 336.1291 | 30.442   | 30.31867 | 30.4965  | 9  | 5 | 4 | 141942.7 | 639047.4 | 492201.9 |
| 409.2325 | 9.637333 | 9.188017 | 9.7372   | 10 | 5 | 4 | 1.72E+08 | 2.83E+08 | 3.21E+08 |
| 687.5435 | 26.3195  | 26.30383 | 26.59167 | 6  | 3 | 1 | 147886.5 | 593874.6 | 624117.2 |
| 569.315  | 9.134567 | 9.004633 | 9.183583 | 6  | 4 | 2 | 3096576  | 6461649  | 8386774  |
| 305.3036 | 27.94117 | 27.88167 | 28.02533 | 10 | 5 | 5 | 1534640  | 7597421  | 7137646  |
| 630.4437 | 26.70933 | 26.631   | 26.73767 | 9  | 4 | 5 | 246640.3 | 949578   | 1107955  |
| 170.1541 | 22.385   | 22.327   | 22.40867 | 7  | 3 | 4 | 98360.02 | 355149.5 | 368436.6 |
| 464.0459 | 27.85242 | 27.84883 | 27.86817 | 4  | 1 | 3 | 36214.54 | 39425.33 | 63391.48 |
| 232.0928 | 10.43838 | 10.34782 | 10.4628  | 7  | 4 | 3 | 604976.7 | 1309038  | 1193577  |
| 657.3686 | 9.251833 | 9.178    | 9.294367 | 5  | 3 | 2 | 2008288  | 3773792  | 5884812  |
| 191.1796 | 21.54467 | 21.44083 | 21.59583 | 5  | 1 | 4 | 251691.2 | 1391929  | 1353846  |
| 413.161  | 25.90625 | 25.89117 | 25.9325  | 4  | 1 | 3 | 40217.19 | 112569.2 | 68990.12 |
| 427.1786 | 15.87585 | 15.84463 | 15.90992 | 3  | 0 | 3 | 50167.69 | 102124.1 | 118905.5 |
| 687.3361 | 21.00675 | 20.94917 | 21.03417 | 6  | 2 | 4 | 840655.8 | 4026833  | 5430539  |
| 470.3157 | 26.23342 | 26.18667 | 26.31783 | 8  | 4 | 4 | 181748.7 | 556452.8 | 429969.5 |
| 319.1913 | 18.42483 | 17.95883 | 18.45067 | 8  | 4 | 3 | 87707.19 | 300119.2 | 206949.9 |
| 910.4381 | 29.228   | 29.19917 | 29.28517 | 5  | 2 | 3 | 72629.22 | 206641   | 224960.9 |
| 432.3118 | 20.41275 | 20.3615  | 20.59983 | 10 | 5 | 5 | 450562.3 | 1952657  | 1878844  |
| 286.1079 | 22.50142 | 22.441   | 22.542   | 10 | 5 | 5 | 408356.9 | 1492981  | 1619290  |
| 672.2267 | 29.22325 | 29.199   | 29.29983 | 4  | 1 | 3 | 109751.8 | 179093.2 | 321654.7 |
| 317.2035 | 26.66483 | 26.62017 | 26.66583 | 5  | 3 | 2 | 43789.37 | 159438.3 | 164546.1 |
| 428.0096 | 15.26123 | 15.2609  | 15.36515 | 3  | 0 | 3 | 44575.11 | 89438.64 | 166238.6 |
| 279.2945 | 30.74042 | 30.52917 | 30.7775  | 4  | 0 | 3 | 88080.58 | 229609.1 | 226361.1 |
| 235.063  | 15.90272 | 15.89132 | 15.95433 | 4  | 1 | 3 | 54274.42 | 196058.7 | 290912.7 |
| 347.8172 | 2.076517 | 2.054783 | 2.092317 | 5  | 4 | 1 | 49899.09 | 472154   | 210556   |
| 529.3125 | 29.47033 | 29.45583 | 29.57867 | 9  | 5 | 4 | 178407   | 636336.9 | 684696.2 |
| 310.2872 | 28.42825 | 28.40983 | 28.47467 | 6  | 2 | 4 | 41069.08 | 115232.5 | 155433   |
| 321.0791 | 25.77808 | 25.71833 | 25.822   | 4  | 1 | 3 | 184766.1 | 639536.7 | 452486.8 |
| 306.2028 | 22.75583 | 22.70783 | 23.06417 | 12 | 5 | 5 | 954757.3 | 3122935  | 4596751  |
| 161.0963 | 28.14717 | 28.04433 | 28.1615  | 9  | 4 | 5 | 479294.1 | 2532792  | 2612248  |
| 244.0645 | 18.13833 | 18.089   | 18.1585  | 7  | 3 | 4 | 242656.3 | 1033503  | 1260295  |
| 368.8913 | 9.52075  | 9.444983 | 9.537367 | 3  | 0 | 3 | 3069976  | 3408276  | 5381499  |
| 363.112  | 30.85533 | 30.73283 | 30.88867 | 8  | 4 | 4 | 217818.5 | 1397428  | 968268.3 |
| 167.9937 | 30.41183 | 30.31867 | 30.47133 | 6  | 2 | 4 | 144693   | 810960.9 | 813685.1 |
| 713.1811 | 30.97317 | 30.94733 | 31.0515  | 7  | 4 | 3 | 93664.15 | 543243.4 | 415981.1 |
| 462.3775 | 28.64308 | 28.52867 | 28.68783 | 8  | 3 | 5 | 431330.2 | 3410518  | 3670603  |
| 329.2306 | 18.32133 | 18.2975  | 18.36533 | 7  | 3 | 4 | 657035.9 | 2703140  | 4027566  |
| 302.1605 | 22.155   | 22.05267 | 22.19417 | 8  | 3 | 5 | 359540.4 | 1481609  | 1530176  |
| 331.21   | 9.80475  | 9.63195  | 9.932383 | 6  | 1 | 3 | 8941157  | 10629374 | 16867521 |
| 268.1    | 22.25642 | 22.21317 | 22.27733 | 6  | 2 | 4 | 1168100  | 6163877  | 8245061  |
| 415.3045 | 20.4245  | 20.382   | 20.59983 | 6  | 3 | 3 | 71483.4  | 297683.5 | 283189   |
| 512.2696 | 41.79942 | 41.50167 | 41.9365  | 6  | 3 | 0 | 34788.97 | 450933.7 | 172269.1 |
| 231.0684 | 22.12267 | 22.03667 | 22.14983 | 9  | 4 | 5 | 1450402  | 5134897  | 7160066  |
| 575.252  | 10.72897 | 10.72183 | 10.74052 | 4  | 1 | 3 | 3086915  | 8638773  | 18212848 |

|          |          |          |          |    |   |   |          |          |          |
|----------|----------|----------|----------|----|---|---|----------|----------|----------|
| 456.3328 | 22.24883 | 22.18067 | 22.479   | 9  | 3 | 4 | 107629.2 | 342235.6 | 327914   |
| 380.3015 | 22.75217 | 22.50833 | 22.807   | 7  | 3 | 3 | 67934.05 | 249576.8 | 362608.7 |
| 619.1725 | 22.3475  | 22.27817 | 22.37883 | 9  | 4 | 5 | 218344.1 | 809133.9 | 908764.6 |
| 398.8272 | 8.95155  | 8.78305  | 9.0047   | 9  | 5 | 4 | 3618235  | 6504136  | 5322429  |
| 367.121  | 19.71183 | 19.66317 | 19.8     | 8  | 3 | 5 | 356055.1 | 944329.3 | 1709123  |
| 599.2693 | 30.99417 | 30.92133 | 31.07383 | 9  | 4 | 5 | 90020.84 | 406068   | 269729.4 |
| 504.125  | 20.89133 | 20.86317 | 20.94767 | 7  | 3 | 4 | 80165.3  | 227256.1 | 227338.1 |
| 415.2935 | 18.939   | 18.90983 | 18.96767 | 10 | 5 | 5 | 5749004  | 22956466 | 28892590 |
| 536.3325 | 10.80752 | 10.79157 | 10.81455 | 5  | 3 | 2 | 469663.8 | 873686.6 | 1358898  |
| 445.2599 | 38.39117 | 38.35433 | 38.44567 | 9  | 4 | 5 | 92138.64 | 454514.8 | 420395.6 |
| 611.2613 | 29.20267 | 29.15567 | 29.22983 | 6  | 5 | 1 | 147593.4 | 391134.2 | 371062.9 |
| 502.2934 | 28.37642 | 28.32717 | 28.47817 | 10 | 5 | 5 | 5895857  | 24462184 | 28014359 |
| 570.3561 | 30.26258 | 30.23533 | 30.36167 | 10 | 5 | 5 | 18594376 | 1.08E+08 | 86744209 |
| 545.3438 | 28.4975  | 28.45233 | 28.58283 | 7  | 3 | 4 | 3075050  | 14420612 | 14640718 |
| 762.5232 | 26.774   | 26.76533 | 26.79583 | 7  | 3 | 4 | 67010.85 | 238931.9 | 297513.2 |
| 354.2224 | 19.79983 | 19.763   | 19.86983 | 7  | 2 | 5 | 104720.1 | 478662   | 481896.9 |
| 326.2332 | 27.50317 | 27.371   | 27.56233 | 7  | 4 | 3 | 100387   | 468434.8 | 517858.5 |
| 508.3403 | 29.78567 | 29.757   | 29.88483 | 10 | 5 | 5 | 3516280  | 22455984 | 17592352 |
| 414.2812 | 13.85224 | 13.7991  | 13.85837 | 4  | 1 | 3 | 44727.02 | 85015.64 | 119747   |
| 312.7139 | 23.48767 | 23.44483 | 23.55217 | 7  | 3 | 4 | 44809.52 | 176523.9 | 223598.8 |
| 687.3364 | 20.65667 | 20.61367 | 20.7355  | 5  | 1 | 4 | 720133.5 | 2460621  | 3374252  |
| 869.3151 | 20.64908 | 20.61367 | 20.7265  | 6  | 2 | 4 | 220987.3 | 575707.3 | 810130.8 |
| 254.0672 | 19.24233 | 19.21983 | 19.27617 | 8  | 4 | 4 | 437857.1 | 1743635  | 2029342  |
| 474.348  | 44.29167 | 44.27733 | 44.29767 | 3  | 0 | 3 | 51985.1  | 512313.4 | 88703.73 |
| 494.1819 | 17.39142 | 17.35567 | 17.3985  | 4  | 1 | 3 | 37462.14 | 104506.1 | 127099.6 |
| 292.4433 | 8.919667 | 8.747883 | 8.989483 | 6  | 4 | 2 | 439557.6 | 841838.6 | 657401.2 |
| 751.6209 | 34.36567 | 34.33717 | 34.4685  | 8  | 3 | 5 | 994131.1 | 3202429  | 1716909  |
| 439.3211 | 41.87633 | 41.86233 | 41.8925  | 4  | 3 | 1 | 79894.53 | 237916.3 | 146409.8 |
| 437.1532 | 21.70933 | 21.60133 | 21.74033 | 7  | 2 | 5 | 229554.6 | 907053.2 | 1073727  |
| 486.0514 | 26.20767 | 26.173   | 26.2475  | 6  | 2 | 4 | 110447.3 | 408513.8 | 585987.8 |
| 562.4009 | 43.7555  | 43.71267 | 43.79117 | 5  | 2 | 3 | 57287.65 | 444897.7 | 84576.1  |
| 422.0249 | 25.68617 | 25.63817 | 25.705   | 9  | 4 | 5 | 233913.4 | 720835.3 | 1075406  |
| 228.2323 | 31.65667 | 31.59783 | 31.704   | 7  | 3 | 4 | 286888   | 1319791  | 1453093  |
| 681.047  | 9.463983 | 9.387533 | 9.577667 | 3  | 0 | 3 | 5631616  | 7847539  | 9797693  |
| 372.1345 | 20.65367 | 20.628   | 20.74433 | 8  | 3 | 5 | 387536.4 | 1498600  | 1939183  |
| 327.1259 | 21.57692 | 21.45517 | 21.6105  | 6  | 2 | 4 | 393474.3 | 2288822  | 1903261  |
| 357.1734 | 22.11425 | 22.05367 | 22.12217 | 4  | 1 | 3 | 59819.91 | 149316.7 | 84525.68 |
| 444.1476 | 12.42978 | 12.32863 | 12.50232 | 4  | 1 | 3 | 54688.14 | 185563   | 395046.6 |
| 225.2158 | 23.048   | 22.96    | 23.06783 | 7  | 3 | 4 | 92129.02 | 313332.6 | 283826.5 |
| 357.0317 | 25.66767 | 25.623   | 25.69217 | 7  | 3 | 4 | 69910.89 | 215672.4 | 301533.3 |
| 407.2881 | 29.80608 | 29.755   | 29.81767 | 8  | 4 | 4 | 53447.13 | 412916   | 200009.5 |
| 439.3325 | 27.32708 | 27.26517 | 27.37883 | 10 | 5 | 5 | 448283.5 | 1765047  | 1960481  |
| 568.3406 | 29.13267 | 29.11167 | 29.22633 | 10 | 5 | 5 | 37330252 | 1.51E+08 | 1.39E+08 |
| 620.2866 | 32.2235  | 32.07333 | 32.2365  | 3  | 0 | 3 | 71992.5  | 173421   | 83993.6  |
| 369.2391 | 9.657717 | 9.435533 | 9.71975  | 5  | 3 | 1 | 60167972 | 77573292 | 1.22E+08 |
| 544.3404 | 28.48433 | 28.45233 | 28.58283 | 8  | 3 | 5 | 9815331  | 49217371 | 48400440 |
| 387.3502 | 23.3115  | 23.23917 | 23.5905  | 13 | 5 | 5 | 1563090  | 6461337  | 7012740  |

|          |          |          |          |    |   |   |          |          |          |
|----------|----------|----------|----------|----|---|---|----------|----------|----------|
| 349.5883 | 26.90283 | 26.85467 | 26.92417 | 6  | 2 | 4 | 60106.3  | 89136.49 | 152243.2 |
| 720.3457 | 24.81142 | 24.7635  | 24.85467 | 8  | 4 | 4 | 71214.89 | 311733.6 | 358820.3 |
| 385.1798 | 35.07    | 35.042   | 35.103   | 3  | 0 | 3 | 44054.24 | 213846.4 | 112593.4 |
| 431.7061 | 10.67149 | 10.599   | 10.75237 | 8  | 3 | 5 | 3625770  | 9826798  | 19577177 |
| 428.1527 | 14.00578 | 13.99132 | 14.12805 | 7  | 3 | 4 | 264873   | 876526.4 | 1689531  |
| 278.1836 | 28.1455  | 28.04433 | 28.1765  | 9  | 4 | 5 | 192052.8 | 1132591  | 849493.5 |
| 278.0689 | 21.701   | 21.67933 | 21.71283 | 5  | 2 | 3 | 55333.24 | 187022.6 | 219850.1 |
| 326.2333 | 25.60483 | 25.56083 | 25.64017 | 5  | 1 | 4 | 160544.6 | 518069.8 | 709737.9 |
| 240.1097 | 4.372683 | 4.141683 | 4.41305  | 4  | 1 | 3 | 800412.3 | 6871448  | 4307856  |
| 295.0606 | 25.68042 | 25.64683 | 25.70383 | 4  | 3 | 1 | 36569.32 | 143432.4 | 62099.21 |
| 359.4828 | 8.809292 | 8.58785  | 8.85675  | 4  | 3 | 1 | 167736.2 | 191172.7 | 146584.5 |
| 242.0691 | 18.124   | 18.04133 | 18.1585  | 9  | 4 | 5 | 766059.1 | 3504438  | 4339530  |
| 271.1885 | 14.5167  | 14.41085 | 14.7077  | 10 | 5 | 5 | 738515.5 | 4232888  | 6374785  |
| 461.2952 | 23.73017 | 23.6485  | 23.75267 | 7  | 4 | 3 | 96976.8  | 552074.6 | 576953.4 |
| 486.3736 | 9.2114   | 9.132617 | 9.280533 | 6  | 3 | 3 | 1043533  | 1451329  | 1240932  |
| 236.0564 | 30.441   | 30.34733 | 30.45967 | 6  | 2 | 4 | 86294.98 | 443679.1 | 469923.9 |
| 394.2957 | 28.68775 | 28.681   | 28.689   | 4  | 1 | 3 | 81175.16 | 340496.1 | 369541.5 |
| 570.4113 | 11.03025 | 10.92607 | 11.13185 | 9  | 4 | 5 | 343630   | 1054532  | 1539436  |
| 509.1841 | 10.41848 | 10.36155 | 10.49713 | 9  | 4 | 5 | 1159193  | 2674359  | 2400852  |
| 319.2832 | 19.88558 | 19.8615  | 19.99017 | 8  | 3 | 5 | 266344.1 | 617822.6 | 943500.5 |
| 526.1563 | 22.183   | 22.0845  | 22.19217 | 6  | 2 | 4 | 559679.8 | 1866217  | 2855147  |
| 469.1789 | 14.05264 | 13.98623 | 14.21977 | 8  | 2 | 5 | 494139.5 | 1676845  | 3123658  |
| 195.1383 | 19.56983 | 19.51717 | 19.58883 | 7  | 3 | 4 | 289729.9 | 2323364  | 1639637  |
| 699.4903 | 34.57392 | 34.55133 | 34.604   | 8  | 3 | 5 | 86944.55 | 329453.9 | 448064.5 |
| 538.1767 | 25.68333 | 25.67167 | 25.689   | 4  | 1 | 3 | 152566.8 | 243199.7 | 466251.2 |
| 311.2949 | 36.621   | 36.60133 | 36.63833 | 10 | 5 | 5 | 1303723  | 10595246 | 8462091  |
| 286.2745 | 23.89833 | 23.824   | 23.91067 | 7  | 3 | 4 | 581478.3 | 2879245  | 3262655  |
| 248.2305 | 28.218   | 28.1925  | 28.23483 | 10 | 5 | 5 | 1004717  | 5684069  | 6038030  |
| 398.3255 | 8.95155  | 8.78305  | 9.0047   | 9  | 5 | 4 | 8361379  | 14745248 | 11113142 |
| 286.1107 | 25.689   | 25.6755  | 25.726   | 5  | 1 | 4 | 59841.67 | 138260.6 | 255859.4 |
| 390.2854 | 36.68058 | 36.64933 | 36.69483 | 6  | 2 | 4 | 164735.8 | 709689.1 | 712957.2 |
| 547.3594 | 30.86167 | 30.83133 | 30.9455  | 10 | 5 | 5 | 2426768  | 14871657 | 11955883 |
| 412.2852 | 22.64283 | 22.574   | 22.66467 | 4  | 3 | 1 | 81458.41 | 310141.4 | 286913.6 |
| 406.1292 | 26.91467 | 26.86317 | 26.94067 | 7  | 3 | 4 | 126657.2 | 538196.5 | 614690.3 |
| 312.181  | 19.52025 | 19.50167 | 19.5465  | 4  | 3 | 1 | 81164.49 | 432002.3 | 402383   |
| 401.3344 | 10.4545  | 10.37973 | 10.53643 | 5  | 3 | 2 | 5.96E+08 | 1.51E+09 | 2.55E+09 |
| 637.3059 | 41.19333 | 41.16333 | 41.23617 | 10 | 5 | 5 | 5686128  | 31850923 | 21364013 |
| 572.0365 | 16.92767 | 16.89217 | 16.96167 | 5  | 2 | 3 | 110826.2 | 243203.8 | 489532   |
| 536.0675 | 19.69667 | 19.65883 | 19.7825  | 8  | 3 | 5 | 1633344  | 4050802  | 8445976  |
| 401.2509 | 12.37087 | 12.3356  | 12.41443 | 5  | 2 | 3 | 1210926  | 3486997  | 3148187  |
| 219.1746 | 24.04467 | 24.00183 | 24.07917 | 6  | 2 | 4 | 314937.5 | 1477851  | 2013581  |
| 928.6678 | 9.823017 | 9.777983 | 9.862433 | 7  | 4 | 3 | 1907520  | 2352187  | 4131074  |
| 432.184  | 21.76967 | 21.6765  | 21.779   | 3  | 0 | 3 | 205486.2 | 331034.2 | 235477.7 |
| 523.8017 | 30.96517 | 30.93483 | 31.07383 | 9  | 4 | 5 | 1033778  | 2762632  | 3374555  |
| 279.0406 | 30.761   | 30.56083 | 30.9075  | 5  | 1 | 3 | 62276.67 | 134342.5 | 155851.8 |
| 442.8013 | 29.72333 | 29.69567 | 29.77283 | 6  | 4 | 2 | 59708.35 | 383008.1 | 97255.55 |
| 679.513  | 18.21025 | 18.14683 | 18.2975  | 4  | 1 | 3 | 3299731  | 17104497 | 8065485  |

|          |          |          |          |    |   |   |          |          |          |
|----------|----------|----------|----------|----|---|---|----------|----------|----------|
| 567.1831 | 22.17658 | 22.10033 | 22.24517 | 6  | 2 | 4 | 181949.7 | 492516   | 830431.2 |
| 379.14   | 31.33092 | 31.301   | 31.34333 | 4  | 0 | 4 | 420679.2 | 822762.6 | 1552719  |
| 638.3097 | 41.20058 | 41.16333 | 41.25083 | 10 | 5 | 5 | 1869657  | 10113034 | 7083465  |
| 726.0091 | 42.82933 | 42.81533 | 42.8875  | 4  | 1 | 3 | 36205.45 | 160047.4 | 25331    |
| 278.1859 | 8.9449   | 8.78305  | 9.031133 | 5  | 3 | 2 | 186900.4 | 284948.1 | 210868.1 |
| 228.1597 | 21.301   | 21.20817 | 21.35033 | 4  | 0 | 4 | 59941.43 | 197003   | 171606.3 |
| 431.2887 | 11.27073 | 11.26468 | 11.32252 | 5  | 3 | 2 | 173383.4 | 357796   | 426905.2 |
| 346.2097 | 29.74017 | 29.72433 | 29.827   | 3  | 0 | 3 | 43814.41 | 284705.9 | 125570.7 |
| 400.981  | 10.40009 | 10.36803 | 10.45082 | 4  | 1 | 3 | 595934.9 | 1541900  | 1593637  |
| 280.1856 | 8.9903   | 8.817733 | 9.031133 | 4  | 4 | 0 | 182241.4 | 224788.7 | 133168.5 |
| 360.2382 | 9.52075  | 9.459367 | 9.565117 | 7  | 4 | 3 | 1858924  | 5738031  | 6740826  |
| 846.4445 | 23.17983 | 23.10367 | 23.20917 | 9  | 4 | 5 | 1099009  | 2279091  | 3025430  |
| 740.3618 | 43.59583 | 43.578   | 43.64517 | 4  | 1 | 3 | 49890.12 | 320798.2 | 122493.6 |
| 425.1095 | 43.35292 | 43.2475  | 43.41183 | 6  | 4 | 2 | 56797.83 | 601850.2 | 105782.4 |
| 667.5139 | 37.41567 | 37.38683 | 37.5685  | 7  | 3 | 4 | 46016.85 | 224446.5 | 229578.5 |
| 428.3094 | 29.96575 | 29.951   | 30.02217 | 6  | 3 | 3 | 37494.78 | 234610.9 | 70243.85 |
| 364.1154 | 30.82075 | 30.73283 | 30.861   | 4  | 1 | 3 | 37271.11 | 126841.2 | 132524.6 |
| 519.3673 | 42.62992 | 42.578   | 42.70617 | 4  | 1 | 3 | 25015.05 | 77738.92 | 17281.16 |
| 385.3512 | 25.77375 | 25.74717 | 25.78767 | 6  | 2 | 4 | 96456.66 | 229657.6 | 305887.3 |
| 351.0531 | 24.71217 | 24.66817 | 24.75017 | 7  | 2 | 5 | 383464.4 | 826035.7 | 1684634  |
| 746.528  | 24.28592 | 24.19517 | 24.416   | 6  | 2 | 3 | 84773.27 | 654995.9 | 826570.8 |
| 437.2608 | 26.44483 | 26.41383 | 26.46317 | 7  | 4 | 3 | 246851.9 | 698658.5 | 852664.6 |
| 507.4639 | 29.71892 | 29.69533 | 29.7725  | 10 | 5 | 5 | 116061.7 | 544899.2 | 390717.3 |
| 468.4416 | 39.69758 | 39.66883 | 39.922   | 10 | 5 | 5 | 5564297  | 42300440 | 16715168 |
| 287.0887 | 18.13075 | 18.07617 | 18.155   | 6  | 3 | 3 | 85952.55 | 500452.5 | 365446.6 |
| 359.2402 | 9.489217 | 9.33635  | 9.584433 | 8  | 4 | 4 | 29429998 | 1.17E+08 | 1.44E+08 |
| 201.1962 | 23.4715  | 23.44483 | 23.53733 | 5  | 2 | 3 | 50351.5  | 176359.3 | 203649.9 |
| 290.6087 | 22.75733 | 22.71833 | 22.78383 | 7  | 3 | 4 | 48799.04 | 165147.3 | 244833.2 |
| 860.112  | 26.87317 | 26.864   | 26.891   | 4  | 1 | 3 | 31149.05 | 58732.53 | 82073.34 |
| 245.0476 | 18.1585  | 18.09117 | 18.16983 | 5  | 2 | 3 | 75570.3  | 334469.1 | 371965.7 |
| 464.8306 | 9.14945  | 9.101033 | 9.280533 | 5  | 3 | 2 | 1186243  | 1191768  | 1340630  |
| 359.2409 | 22.37667 | 22.31083 | 22.41483 | 9  | 4 | 5 | 407118.8 | 1748939  | 2117043  |
| 365.5606 | 9.537367 | 9.52075  | 9.545617 | 3  | 0 | 3 | 3092154  | 3113765  | 5343797  |
| 523.2999 | 30.95767 | 30.93717 | 31.07383 | 10 | 5 | 5 | 2062035  | 5375747  | 6723577  |
| 194.0095 | 13.41414 | 13.30308 | 13.53058 | 6  | 2 | 4 | 75148.77 | 625929.1 | 427796.9 |
| 249.0791 | 22.12875 | 22.05267 | 22.14983 | 8  | 3 | 5 | 264950.3 | 588938.8 | 780809.4 |
| 490.3835 | 24.09975 | 24.07833 | 24.2995  | 6  | 3 | 3 | 69052.48 | 249465.5 | 284692.5 |
| 526.4109 | 34.21783 | 34.18167 | 34.24567 | 8  | 3 | 5 | 89777.29 | 491606.7 | 208022.9 |
| 449.3276 | 28.76083 | 28.74617 | 28.78    | 5  | 2 | 3 | 65688.74 | 177239.5 | 156857.3 |
| 414.0524 | 19.344   | 19.29933 | 19.364   | 8  | 3 | 5 | 212841.5 | 793221   | 1016191  |
| 245.1064 | 21.69342 | 21.57183 | 21.71567 | 8  | 5 | 3 | 129728.9 | 428693.5 | 311978.1 |
| 982.4519 | 27.23733 | 27.17617 | 27.25833 | 9  | 5 | 4 | 185775.4 | 675570.6 | 687546.7 |
| 323.2222 | 28.34825 | 28.26817 | 28.35633 | 6  | 3 | 3 | 141591.7 | 650246.4 | 585965.2 |
| 508.3361 | 9.7788   | 9.730617 | 9.866317 | 5  | 2 | 3 | 440866   | 902611.3 | 1164232  |
| 548.3079 | 30.92908 | 30.8905  | 31.017   | 6  | 2 | 4 | 429186.5 | 1170029  | 1281785  |
| 544.2438 | 9.19665  | 9.15355  | 9.2866   | 6  | 2 | 4 | 7155754  | 11487619 | 20311869 |
| 689.282  | 36.87858 | 36.85667 | 36.99267 | 6  | 2 | 4 | 212269.5 | 1038972  | 938615   |

|          |          |          |          |    |   |   |          |          |          |
|----------|----------|----------|----------|----|---|---|----------|----------|----------|
| 538.4326 | 25.3805  | 25.34317 | 25.40217 | 8  | 4 | 4 | 210311   | 529459.6 | 695197.4 |
| 477.3103 | 8.800333 | 8.780583 | 8.972583 | 3  | 3 | 0 | 18832520 | 59051943 | 90893490 |
| 543.3283 | 26.86858 | 26.81367 | 26.919   | 10 | 5 | 5 | 1533662  | 6675135  | 6227911  |
| 513.0278 | 27.12667 | 27.08717 | 27.164   | 6  | 2 | 4 | 151148.8 | 306896.7 | 503233.1 |
| 488.2698 | 42.70817 | 42.62283 | 42.865   | 4  | 3 | 0 | 37215.82 | 355400.1 | 155467.8 |
| 574.2488 | 10.72884 | 10.68362 | 11.02648 | 6  | 1 | 5 | 11483314 | 34239916 | 70674910 |
| 772.1871 | 29.14792 | 29.12383 | 29.17717 | 4  | 1 | 3 | 61090.02 | 116858.3 | 159526.7 |
| 447.0632 | 21.13833 | 21.12633 | 21.15517 | 5  | 2 | 3 | 133281.3 | 527346.7 | 545466.2 |
| 579.2937 | 30.84833 | 30.73283 | 30.88867 | 10 | 5 | 5 | 4456586  | 23588368 | 23584790 |
| 534.072  | 19.70433 | 19.68733 | 19.7255  | 4  | 1 | 3 | 161846.2 | 378959.9 | 815066.7 |
| 601.1154 | 20.64792 | 20.61367 | 20.71717 | 8  | 3 | 5 | 306003   | 1044071  | 1423856  |
| 588.4108 | 10.1429  | 10.11443 | 10.14968 | 5  | 2 | 3 | 525903.6 | 517384.2 | 836616.3 |
| 255.0877 | 22.12492 | 22.05267 | 22.14983 | 10 | 5 | 5 | 2025497  | 7281475  | 10283741 |
| 419.1371 | 20.9745  | 20.94917 | 21.01983 | 4  | 1 | 3 | 102746.1 | 453898.7 | 577765.4 |
| 482.4055 | 35.50667 | 35.49583 | 35.55017 | 7  | 3 | 4 | 555899.1 | 7835749  | 7581456  |
| 359.2047 | 11.298   | 11.27073 | 11.36423 | 5  | 1 | 4 | 657194.3 | 1802771  | 1466913  |
| 251.2009 | 28.29283 | 28.1635  | 28.30833 | 7  | 3 | 4 | 204862.9 | 1085860  | 919960.6 |
| 295.191  | 19.82133 | 19.772   | 19.92167 | 9  | 5 | 4 | 533377.6 | 2814919  | 2403585  |
| 425.7754 | 8.793992 | 8.551733 | 8.877983 | 8  | 5 | 3 | 502237.9 | 1348256  | 990289.2 |
| 752.6239 | 34.36567 | 34.3555  | 34.37217 | 4  | 4 | 0 | 457921   | 1424882  | 779723.1 |
| 501.2812 | 26.13433 | 26.09583 | 26.205   | 9  | 5 | 4 | 501147.8 | 1335604  | 1470447  |
| 348.2825 | 27.29617 | 27.25033 | 27.37867 | 9  | 4 | 5 | 223883.6 | 792996   | 944987.1 |
| 278.0673 | 20.25667 | 20.22267 | 20.403   | 6  | 3 | 3 | 102278   | 510111.4 | 571010.7 |
| 424.0214 | 25.68575 | 25.65983 | 25.71367 | 6  | 2 | 4 | 112209   | 286347.2 | 508873.5 |
| 281.0512 | 42.75867 | 42.7395  | 42.77833 | 5  | 3 | 2 | 27670.83 | 147217.2 | 68246.78 |
| 414.2959 | 32.6535  | 32.60533 | 32.6705  | 4  | 0 | 4 | 115835.8 | 919514.1 | 713267.5 |
| 582.257  | 20.42283 | 20.411   | 20.57583 | 5  | 2 | 3 | 123020.7 | 350399.2 | 316065.8 |
| 174.1492 | 15.01578 | 14.97883 | 15.0541  | 4  | 1 | 3 | 39789.86 | 89268.8  | 97352.44 |
| 328.3004 | 27.029   | 26.98533 | 27.06967 | 7  | 3 | 4 | 254440.1 | 1106857  | 1277334  |
| 364.0255 | 17.077   | 17.03717 | 17.14583 | 4  | 0 | 4 | 35735.86 | 178323.7 | 67045.53 |
| 396.0833 | 19.34258 | 19.3205  | 19.3935  | 6  | 4 | 2 | 60839.66 | 213599.8 | 117710   |
| 408.2288 | 20.21608 | 20.21033 | 20.3445  | 4  | 0 | 4 | 70095.39 | 317450.7 | 172234.7 |
| 657.9071 | 19.33667 | 19.316   | 19.40817 | 4  | 1 | 3 | 79198.8  | 63460.84 | 83501.29 |
| 238.1886 | 18.8655  | 18.83417 | 18.93733 | 3  | 0 | 3 | 44000.21 | 223604.6 | 242905.8 |
| 334.0967 | 32.77958 | 32.72633 | 32.835   | 6  | 3 | 3 | 21475.12 | 84498.93 | 67968.77 |
| 523.3594 | 31.25    | 31.22767 | 31.32933 | 6  | 3 | 3 | 1639219  | 14219556 | 11759812 |
| 346.2535 | 21.88017 | 21.70667 | 21.904   | 10 | 5 | 5 | 1748511  | 10317559 | 10439799 |
| 799.5485 | 23.23833 | 23.207   | 23.26967 | 7  | 3 | 4 | 1414824  | 2824000  | 3837613  |
| 267.1746 | 28.76908 | 28.70933 | 28.81933 | 6  | 2 | 4 | 284948.4 | 2244317  | 2748628  |
| 583.3003 | 29.18317 | 29.15517 | 29.25583 | 7  | 3 | 4 | 1108293  | 3088221  | 3945824  |
| 659.2176 | 41.19308 | 41.16333 | 41.23617 | 10 | 5 | 5 | 101812.1 | 599253.7 | 396642.8 |
| 622.7621 | 29.14467 | 29.12633 | 29.2115  | 4  | 1 | 3 | 91877.83 | 158887.1 | 267877.3 |
| 325.9885 | 16.949   | 16.9035  | 16.973   | 4  | 1 | 3 | 42271.12 | 122955.1 | 138857   |
| 648.3966 | 19.05475 | 19.026   | 19.086   | 8  | 4 | 4 | 71971.85 | 210449.9 | 244150   |
| 408.2232 | 43.5875  | 43.57467 | 43.60167 | 3  | 0 | 3 | 214372.3 | 3676299  | 591903.5 |
| 365.5931 | 29.152   | 29.12633 | 29.198   | 4  | 1 | 3 | 79780.69 | 192003.1 | 289658.2 |
| 250.1651 | 6.81415  | 6.59705  | 6.874467 | 5  | 2 | 3 | 6408270  | 1.03E+08 | 1.69E+08 |

|          |          |          |          |    |   |   |          |          |          |
|----------|----------|----------|----------|----|---|---|----------|----------|----------|
| 566.2393 | 26.238   | 26.202   | 26.346   | 5  | 2 | 3 | 40139.61 | 100805.6 | 118618.8 |
| 575.7691 | 30.93658 | 30.87817 | 31.017   | 4  | 1 | 3 | 138140   | 197100   | 413125.1 |
| 380.0877 | 30.43367 | 30.34733 | 30.50117 | 6  | 2 | 4 | 1866529  | 4942617  | 10081379 |
| 502.2464 | 20.4375  | 20.3965  | 20.497   | 5  | 2 | 3 | 134209.3 | 396759.3 | 520223   |
| 313.1226 | 25.67292 | 25.63383 | 25.69883 | 8  | 3 | 5 | 388541.2 | 1522734  | 1420207  |
| 467.3489 | 20.42042 | 20.3615  | 20.588   | 10 | 5 | 5 | 380229.9 | 1795220  | 1688716  |
| 447.2744 | 40.4405  | 40.40733 | 40.4725  | 9  | 4 | 5 | 72784.11 | 398697.2 | 249068.2 |
| 450.3222 | 21.15617 | 21.14417 | 21.264   | 5  | 3 | 2 | 622213.4 | 2893049  | 2598067  |
| 301.0761 | 22.65975 | 22.5875  | 22.69    | 8  | 4 | 4 | 98678.04 | 425547.7 | 431578.9 |
| 368.3012 | 22.48267 | 22.441   | 22.51817 | 5  | 2 | 3 | 74958.1  | 236962   | 269474   |
| 386.3423 | 24.99383 | 24.95233 | 25.00367 | 7  | 3 | 4 | 385260.4 | 1371858  | 1687392  |
| 203.107  | 19.56983 | 19.51717 | 19.599   | 9  | 4 | 5 | 298538   | 1988840  | 1948578  |
| 469.445  | 39.69825 | 39.66883 | 39.922   | 10 | 5 | 5 | 1893546  | 12919877 | 5523786  |
| 347.1775 | 35.089   | 35.0125  | 35.11767 | 9  | 4 | 5 | 265423.9 | 1134364  | 1331432  |
| 440.2468 | 25.67708 | 25.623   | 25.71367 | 6  | 2 | 4 | 352372.6 | 533570.4 | 911282.4 |
| 311.1648 | 27.516   | 27.39967 | 27.547   | 7  | 3 | 4 | 95152.29 | 432130.9 | 348058.8 |
| 240.1961 | 21.40183 | 21.261   | 21.4345  | 9  | 4 | 5 | 103624   | 546732.9 | 549532.2 |
| 667.4571 | 34.74575 | 34.72133 | 34.7925  | 4  | 1 | 3 | 24377.53 | 77190.88 | 121475.1 |
| 464.837  | 9.837683 | 9.763683 | 10.06338 | 10 | 4 | 4 | 3073877  | 4607836  | 7794731  |
| 286.2746 | 25.03108 | 24.9975  | 25.053   | 10 | 5 | 5 | 5242168  | 20820998 | 23363067 |
| 652.4261 | 10.86477 | 10.82042 | 10.89825 | 5  | 2 | 3 | 496395.3 | 545554.9 | 852319.5 |
| 582.202  | 25.689   | 25.64683 | 25.71367 | 5  | 1 | 4 | 139466.4 | 211291.5 | 468930.8 |
| 484.3637 | 29.25717 | 29.243   | 29.3435  | 5  | 3 | 2 | 59480.12 | 230051.5 | 226185.9 |
| 518.325  | 26.70308 | 26.684   | 26.76533 | 6  | 2 | 4 | 495202.8 | 1948005  | 1863773  |
| 402.3372 | 25.21225 | 25.17983 | 25.23083 | 6  | 2 | 4 | 258896.2 | 974506.7 | 1025415  |
| 546.356  | 30.86908 | 30.83133 | 30.9455  | 10 | 5 | 5 | 7901944  | 51083303 | 39587537 |
| 398.3058 | 30.01392 | 29.98567 | 30.02767 | 8  | 4 | 4 | 161792.8 | 893868.8 | 947388.3 |
| 526.2916 | 9.029692 | 8.9037   | 9.0867   | 4  | 3 | 1 | 565479.8 | 1207924  | 1431157  |
| 878.6069 | 33.94667 | 33.90033 | 33.99433 | 5  | 2 | 3 | 105820.2 | 714010.2 | 713179.7 |
| 648.4461 | 43.293   | 43.29233 | 43.33667 | 5  | 3 | 2 | 31055.24 | 136926.4 | 48592.1  |
| 482.348  | 24.22467 | 24.097   | 24.269   | 10 | 5 | 5 | 356394.9 | 1491382  | 1566834  |
| 521.7859 | 27.48667 | 27.4605  | 27.56117 | 5  | 2 | 3 | 118058.7 | 300831.9 | 404281.7 |
| 393.1331 | 18.85133 | 18.81983 | 18.8935  | 5  | 1 | 4 | 140078.8 | 378016.7 | 417628.6 |
| 328.1999 | 9.059967 | 8.92085  | 9.100467 | 4  | 3 | 1 | 353270.6 | 463794.1 | 697484.9 |
| 594.9658 | 19.71067 | 19.69017 | 19.7225  | 5  | 1 | 4 | 167166.4 | 393568.4 | 827894   |
| 296.1144 | 22.12067 | 22.03667 | 22.14983 | 10 | 5 | 5 | 2426586  | 9809269  | 13525557 |
| 422.3482 | 38.0715  | 38.0385  | 38.11267 | 4  | 1 | 3 | 135899   | 375716.3 | 306493.9 |
| 290.2847 | 27.48867 | 27.472   | 27.53733 | 5  | 2 | 3 | 34235.21 | 87726.86 | 110314.9 |
| 274.5978 | 22.129   | 22.06867 | 22.21567 | 6  | 2 | 4 | 148237.1 | 296202.2 | 586760.8 |
| 491.2911 | 22.51933 | 22.4575  | 22.56017 | 9  | 4 | 5 | 168705.9 | 685169.4 | 775300.7 |
| 437.2632 | 11.20218 | 11.13748 | 11.22767 | 4  | 1 | 3 | 97777.12 | 201854.5 | 270407.7 |
| 346.2536 | 21.44658 | 21.31517 | 21.47    | 8  | 4 | 4 | 1362632  | 7037805  | 7089567  |
| 1016.674 | 29.62192 | 29.6215  | 29.6665  | 4  | 3 | 1 | 26688.08 | 62315.52 | 18958.84 |
| 179.0172 | 7.318133 | 7.191067 | 7.7073   | 7  | 5 | 1 | 18190336 | 1.08E+08 | 1.13E+08 |
| 929.6264 | 29.68417 | 29.65917 | 29.72433 | 10 | 5 | 5 | 49571.53 | 400914.3 | 75257.87 |
| 410.1624 | 21.0085  | 20.963   | 21.0485  | 5  | 2 | 3 | 156390.3 | 1094825  | 822382.7 |
| 478.315  | 25.03817 | 24.99133 | 25.05017 | 9  | 4 | 5 | 186561.4 | 724865.3 | 786072.5 |

|          |          |          |          |    |   |   |          |          |          |
|----------|----------|----------|----------|----|---|---|----------|----------|----------|
| 549.1519 | 10.6797  | 10.63273 | 10.7167  | 7  | 4 | 3 | 635149.6 | 1881548  | 2381754  |
| 303.0894 | 21.2115  | 21.18583 | 21.22083 | 5  | 2 | 3 | 60607.83 | 186006.6 | 231604.3 |
| 495.3407 | 29.66633 | 29.629   | 29.68067 | 8  | 4 | 4 | 74360.88 | 651556.1 | 175732.6 |
| 288.2902 | 25.53383 | 25.50067 | 25.58433 | 6  | 2 | 4 | 61048.35 | 187038.3 | 216510.1 |
| 499.3826 | 31.50158 | 31.47917 | 31.5415  | 4  | 1 | 3 | 78703.84 | 366619.1 | 343800.3 |
| 326.2526 | 11.64675 | 11.62662 | 11.65747 | 6  | 3 | 3 | 613798   | 1075739  | 1673576  |
| 582.4356 | 29.09725 | 29.07833 | 29.1255  | 6  | 2 | 4 | 48029.72 | 101732.8 | 103640.4 |
| 395.2267 | 20.94633 | 20.93317 | 21.09433 | 4  | 0 | 3 | 56767.26 | 174827.4 | 215125.7 |
| 266.1731 | 15.12812 | 15.09967 | 15.18693 | 7  | 3 | 4 | 50874.88 | 255185.1 | 243814.4 |
| 586.4997 | 30.16875 | 30.13483 | 30.24717 | 8  | 4 | 4 | 71997.45 | 345357.6 | 266160.1 |
| 260.0797 | 18.128   | 18.07617 | 18.1585  | 8  | 3 | 5 | 216368.6 | 1032234  | 1029719  |
| 410.1714 | 23.56033 | 23.54633 | 23.58183 | 4  | 0 | 4 | 96998.15 | 313845.4 | 156099.8 |
| 411.1455 | 26.652   | 26.64117 | 26.67933 | 6  | 2 | 4 | 85947.44 | 252730.8 | 228860.6 |
| 637.2617 | 32.13575 | 32.0875  | 32.146   | 6  | 1 | 5 | 133236.2 | 231680.1 | 467207.2 |
| 471.3613 | 8.926225 | 8.677417 | 9.30105  | 8  | 4 | 3 | 9390553  | 20609957 | 16171798 |
| 422.2386 | 44.73817 | 44.39067 | 44.975   | 7  | 1 | 3 | 61300.64 | 748582.2 | 185358.1 |
| 506.2419 | 20.43342 | 20.39183 | 20.588   | 8  | 3 | 5 | 412882.9 | 1494112  | 1836704  |
| 327.3376 | 24.57917 | 24.53233 | 24.60117 | 7  | 3 | 4 | 94763.73 | 425430.8 | 476236.2 |
| 394.2959 | 27.75192 | 27.705   | 27.76567 | 8  | 4 | 4 | 134682.5 | 718566.5 | 735230.3 |
| 499.1451 | 25.689   | 25.64683 | 25.69883 | 5  | 1 | 4 | 201670.5 | 327125.1 | 717316.7 |
| 788.2648 | 20.64908 | 20.62817 | 20.687   | 4  | 1 | 3 | 221372.5 | 601661   | 837941.8 |
| 541.4047 | 29.22133 | 29.18433 | 29.31467 | 8  | 4 | 4 | 66452.58 | 341833.9 | 320697.4 |
| 236.0565 | 19.22917 | 19.205   | 19.26167 | 7  | 4 | 3 | 139681.5 | 491640.7 | 582957.1 |
| 736.1779 | 29.111   | 29.08283 | 29.12433 | 3  | 3 | 0 | 97117.63 | 186620   | 92359.06 |
| 425.386  | 18.27483 | 18.24817 | 18.28683 | 7  | 3 | 4 | 51618.14 | 108089.7 | 123712.3 |
| 350.2072 | 9.094733 | 8.954783 | 9.155983 | 6  | 4 | 2 | 636441.3 | 1210980  | 1175437  |
| 591.2432 | 7.464333 | 7.425917 | 7.4933   | 5  | 2 | 3 | 907113.6 | 1281537  | 2707186  |
| 384.1842 | 18.128   | 18.06983 | 18.155   | 8  | 3 | 5 | 1402102  | 4777025  | 6956070  |
| 508.2378 | 20.44092 | 20.382   | 20.59983 | 8  | 3 | 5 | 144911.4 | 494454.5 | 605853.3 |
| 413.1611 | 20.64217 | 20.61367 | 20.7355  | 5  | 2 | 3 | 756064   | 3266243  | 4251202  |
| 477.2646 | 18.94583 | 18.92367 | 18.96767 | 4  | 1 | 3 | 41610.09 | 132752.4 | 124705.2 |
| 164.0788 | 28.83383 | 28.795   | 28.95133 | 5  | 2 | 3 | 195485.2 | 1756443  | 2064527  |
| 323.2416 | 28.14683 | 28.04433 | 28.1615  | 7  | 3 | 4 | 92254.56 | 380759.3 | 285890.6 |
| 342.2283 | 26.28333 | 26.20983 | 26.33733 | 7  | 3 | 4 | 75460.09 | 351732.5 | 353510.8 |
| 649.5019 | 41.19333 | 41.16333 | 41.23617 | 10 | 5 | 5 | 106503.2 | 599895.2 | 408291.8 |
| 439.3651 | 19.65667 | 19.6445  | 19.765   | 8  | 4 | 4 | 67950.51 | 236505.7 | 247976.4 |
| 502.1746 | 10.66322 | 10.56983 | 10.77118 | 9  | 4 | 5 | 2275975  | 7137997  | 14299373 |
| 203.0367 | 13.6964  | 13.47668 | 13.76748 | 7  | 2 | 4 | 230413.4 | 1342033  | 2462901  |
| 471.398  | 39.69917 | 39.6695  | 39.77033 | 9  | 5 | 4 | 19239.67 | 84565.49 | 42263.39 |
| 246.1704 | 14.56693 | 14.4543  | 14.6547  | 9  | 4 | 5 | 470646.9 | 3810229  | 4140131  |
| 429.2256 | 19.57458 | 19.55817 | 19.64167 | 10 | 5 | 5 | 1906408  | 8806565  | 8423197  |
| 221.5898 | 9.688608 | 9.65795  | 9.733967 | 4  | 1 | 3 | 1754514  | 1554549  | 2882650  |
| 509.3437 | 29.78533 | 29.757   | 29.88483 | 10 | 5 | 5 | 948163.9 | 5619438  | 4652460  |
| 240.1314 | 24.5795  | 24.5465  | 24.61617 | 5  | 2 | 3 | 36325.17 | 112138.9 | 126046.2 |
| 862.6115 | 25.166   | 25.1385  | 25.20667 | 6  | 2 | 4 | 151287.4 | 730946.8 | 966925.5 |
| 241.0763 | 21.6935  | 21.557   | 21.7275  | 7  | 2 | 5 | 94641.8  | 387155.8 | 268195.2 |
| 216.1405 | 9.534967 | 9.5169   | 9.537367 | 3  | 0 | 3 | 2883327  | 4260020  | 8472877  |

|          |          |          |          |    |   |   |          |          |          |
|----------|----------|----------|----------|----|---|---|----------|----------|----------|
| 167.9938 | 19.23883 | 19.21983 | 19.27617 | 10 | 5 | 5 | 496691.5 | 2100129  | 2472329  |
| 415.2937 | 17.60425 | 17.58967 | 17.63133 | 10 | 5 | 5 | 2017676  | 9606954  | 11055840 |
| 458.2396 | 26.4475  | 26.4285  | 26.47767 | 7  | 4 | 3 | 143077.8 | 394315   | 556581.8 |
| 274.2746 | 20.41658 | 20.39167 | 20.55133 | 10 | 5 | 5 | 175051.3 | 645073.3 | 683106.7 |
| 391.1321 | 16.68233 | 16.63858 | 16.72017 | 8  | 3 | 5 | 237958.7 | 915429.6 | 1333006  |
| 382.3155 | 16.55955 | 16.5226  | 16.59778 | 7  | 3 | 4 | 35920.89 | 93819.99 | 105000.4 |
| 210.969  | 16.95033 | 16.93633 | 16.98333 | 4  | 1 | 3 | 65208.29 | 255550.5 | 366514.3 |
| 435.3449 | 34.183   | 34.15783 | 34.31533 | 7  | 3 | 4 | 55224.64 | 247830.9 | 117128.7 |
| 792.3673 | 28.596   | 28.56717 | 28.61483 | 8  | 3 | 5 | 79232.87 | 286546.6 | 274144.5 |
| 438.3223 | 13.4196  | 13.40133 | 13.43332 | 5  | 2 | 3 | 31746.06 | 138123.4 | 51434.24 |
| 595.3009 | 29.16633 | 29.11167 | 29.2115  | 6  | 2 | 4 | 371803.8 | 914813.5 | 1199830  |
| 223.0544 | 10.93657 | 10.73612 | 10.9966  | 7  | 4 | 3 | 667906.4 | 3124903  | 2985084  |
| 800.552  | 23.246   | 23.2155  | 23.255   | 6  | 2 | 4 | 596648.2 | 1334225  | 1823123  |
| 378.2492 | 31.06583 | 31.00267 | 31.10333 | 7  | 3 | 4 | 420173   | 2818173  | 1552608  |
| 504.3226 | 25.07083 | 25.05    | 25.12733 | 3  | 0 | 3 | 179266.8 | 643227.5 | 852492.6 |
| 313.1218 | 19.42592 | 19.414   | 19.46717 | 6  | 2 | 4 | 167467.8 | 654669.2 | 157318   |
| 725.3206 | 10.66402 | 10.6177  | 10.69325 | 3  | 0 | 3 | 530073.5 | 507408.5 | 557032.9 |
| 466.2651 | 43.60167 | 43.572   | 43.62017 | 5  | 2 | 3 | 170627.4 | 2976462  | 581837.9 |
| 243.2879 | 27.45608 | 27.38417 | 27.49267 | 6  | 2 | 4 | 36179.07 | 81161.4  | 94060.89 |
| 326.3252 | 23.27692 | 23.23917 | 23.282   | 6  | 3 | 3 | 45199.06 | 131549.2 | 132446.4 |
| 366.6596 | 9.548692 | 9.52075  | 9.6125   | 4  | 1 | 3 | 23149504 | 27229519 | 44919589 |
| 435.2958 | 27.94233 | 27.851   | 27.97    | 7  | 3 | 4 | 58595.73 | 239777   | 179893.4 |
| 333.264  | 32.23167 | 32.17767 | 32.28017 | 7  | 3 | 4 | 71287.32 | 285260.5 | 311904.4 |
| 300.09   | 22.12617 | 22.03667 | 22.15067 | 8  | 3 | 5 | 349195.1 | 1083491  | 1484546  |
| 310.985  | 22.97567 | 22.93017 | 23.03917 | 6  | 2 | 4 | 91332.25 | 250273.6 | 419851.6 |
| 454.3499 | 9.199792 | 8.881033 | 9.280533 | 8  | 5 | 3 | 1.28E+09 | 3.04E+09 | 2.25E+09 |
| 327.0786 | 27.2005  | 27.10133 | 27.23967 | 10 | 5 | 5 | 753902.5 | 2873033  | 2713005  |
| 443.3965 | 18.113   | 18.0645  | 18.155   | 10 | 5 | 5 | 302411.6 | 1201410  | 1164995  |
| 357.9572 | 17.97975 | 17.88483 | 18.02    | 6  | 3 | 3 | 194594.2 | 835861.8 | 1326540  |
| 457.1801 | 21.00583 | 20.96633 | 21.0485  | 7  | 2 | 5 | 742877.1 | 3950854  | 4958683  |
| 429.2734 | 9.837617 | 9.73415  | 9.869583 | 7  | 4 | 3 | 281466.4 | 577635   | 803402.3 |
| 233.0914 | 10.39378 | 10.36557 | 10.43838 | 5  | 4 | 1 | 272277.6 | 426668.7 | 317982.7 |
| 437.3125 | 32.60467 | 32.5415  | 32.627   | 3  | 0 | 3 | 34423.45 | 109929.3 | 33974.98 |
| 310.2384 | 31.8845  | 31.7965  | 31.92367 | 5  | 1 | 4 | 23773.01 | 70158.19 | 48044.21 |
| 251.2007 | 33.82917 | 33.74017 | 33.84733 | 5  | 2 | 3 | 185822.5 | 864167.7 | 771524.7 |
| 350.2907 | 32.21867 | 32.18017 | 32.26167 | 7  | 2 | 5 | 119055.5 | 536864   | 571686.5 |
| 295.1181 | 23.181   | 23.11333 | 23.20917 | 8  | 4 | 4 | 144248.7 | 495074.5 | 453678.7 |
| 388.9664 | 11.02951 | 10.8821  | 11.07922 | 4  | 1 | 3 | 258490.3 | 546554.7 | 1108238  |
| 289.1762 | 22.75367 | 22.70783 | 22.78383 | 10 | 5 | 5 | 14003690 | 62974427 | 73429740 |
| 285.1127 | 26.909   | 26.79317 | 26.95533 | 5  | 2 | 3 | 39884.76 | 137450.1 | 89533.08 |
| 314.6128 | 23.48767 | 23.4305  | 23.616   | 9  | 4 | 5 | 78853.48 | 439804.3 | 501599   |
| 451.2531 | 9.17875  | 8.931167 | 9.211383 | 4  | 3 | 1 | 7513665  | 10455192 | 14725515 |
| 294.8613 | 8.917533 | 8.7127   | 8.9755   | 9  | 5 | 4 | 2171645  | 4931440  | 3791151  |
| 434.2451 | 23.17633 | 23.10367 | 23.21    | 10 | 5 | 5 | 625640.4 | 2228119  | 2110720  |
| 397.9412 | 29.65167 | 29.57833 | 29.696   | 6  | 3 | 3 | 27673.25 | 107713.6 | 114187.4 |
| 213.0776 | 19.35658 | 19.32817 | 19.37867 | 10 | 5 | 5 | 340808.4 | 1631728  | 1626781  |
| 257.2227 | 19.78767 | 19.7165  | 19.86983 | 4  | 1 | 3 | 33936.05 | 66916.29 | 56469.31 |



|          |          |          |          |    |   |   |          |          |          |
|----------|----------|----------|----------|----|---|---|----------|----------|----------|
| 719.5001 | 26.76533 | 26.74017 | 26.79583 | 5  | 2 | 3 | 46167.14 | 151422.5 | 195188.9 |
| 349.385  | 9.49235  | 9.473767 | 9.537367 | 3  | 0 | 3 | 3969847  | 4333029  | 8404042  |
| 213.1489 | 19.5725  | 19.5465  | 19.59933 | 7  | 3 | 4 | 210856.2 | 1535870  | 1215022  |
| 538.0673 | 19.689   | 19.66317 | 19.7255  | 7  | 3 | 4 | 163855.7 | 414584.9 | 726944   |
| 332.3164 | 28.52792 | 28.48633 | 28.55183 | 10 | 5 | 5 | 1965090  | 10741716 | 8579805  |
| 426.1371 | 20.54117 | 20.498   | 20.56783 | 5  | 2 | 3 | 99003.6  | 267571.9 | 356268.8 |
| 553.2271 | 21.737   | 21.60133 | 21.77533 | 9  | 5 | 4 | 174131.8 | 750888.7 | 777291.8 |
| 295.3816 | 28.15425 | 28.04433 | 28.176   | 6  | 3 | 3 | 36092.1  | 140823.1 | 167749.2 |
| 225.0914 | 20.58483 | 20.55583 | 20.6345  | 5  | 2 | 3 | 77366.67 | 501314.7 | 354504.4 |
| 494.3246 | 28.091   | 28.02533 | 28.1785  | 6  | 3 | 3 | 2731691  | 22443767 | 20290057 |
| 773.0701 | 32.12608 | 32.10267 | 32.1585  | 4  | 1 | 3 | 68672.94 | 80950.04 | 165647.5 |
| 641.4487 | 32.05867 | 32.05633 | 32.08817 | 5  | 2 | 3 | 111696.9 | 396742.8 | 478837   |
| 323.0946 | 21.39033 | 21.24767 | 21.41983 | 6  | 2 | 4 | 178567.5 | 682992   | 710879.7 |
| 349.2656 | 9.2132   | 9.116917 | 9.266783 | 9  | 5 | 4 | 17522582 | 26733916 | 21776263 |
| 571.4614 | 35.35267 | 35.326   | 35.37333 | 5  | 2 | 3 | 232833.2 | 3787435  | 5009970  |
| 191.0857 | 26.49617 | 26.40217 | 26.572   | 6  | 3 | 3 | 48482.36 | 195928.1 | 169389.2 |
| 426.3067 | 31.81642 | 31.7965  | 31.868   | 6  | 2 | 4 | 65117.68 | 219096   | 247462.7 |
| 369.2654 | 10.4282  | 10.37652 | 10.47077 | 6  | 2 | 3 | 992506.8 | 1478501  | 1765452  |
| 374.1744 | 9.451617 | 9.30105  | 9.506667 | 6  | 2 | 4 | 2657172  | 4386836  | 5654480  |
| 229.1994 | 27.29617 | 27.24267 | 27.34783 | 7  | 3 | 4 | 43216.88 | 134361.5 | 136946.3 |
| 417.3001 | 18.95333 | 18.92367 | 18.96783 | 5  | 3 | 2 | 95936.34 | 293409.4 | 376137.4 |
| 425.3386 | 28.77533 | 28.73167 | 28.82533 | 5  | 2 | 3 | 43435.73 | 114282   | 94915.01 |
| 600.441  | 28.81017 | 28.80467 | 28.823   | 5  | 2 | 3 | 51245.07 | 221690.7 | 259566.9 |
| 398.2915 | 11.47827 | 11.4274  | 11.48722 | 7  | 4 | 3 | 626993.5 | 2337613  | 2737359  |
| 168.9972 | 27.86817 | 27.76383 | 27.90983 | 5  | 2 | 3 | 55525.68 | 193276.3 | 205049   |
| 404.2995 | 22.47383 | 22.42483 | 22.4975  | 5  | 1 | 4 | 163225.8 | 401756.8 | 436821.8 |
| 631.134  | 18.12117 | 18.089   | 18.13517 | 4  | 1 | 3 | 67823.86 | 102403.6 | 211562.2 |
| 274.2019 | 9.763    | 9.726917 | 9.862433 | 6  | 5 | 1 | 228972.6 | 629967.8 | 1020184  |
| 496.3307 | 27.76083 | 27.72183 | 27.84883 | 5  | 3 | 2 | 276683.8 | 1351154  | 1154200  |
| 351.1093 | 16.6695  | 16.53923 | 16.715   | 10 | 4 | 5 | 189136.9 | 781570.6 | 1143286  |
| 342.2696 | 34.74933 | 34.708   | 34.78367 | 4  | 1 | 3 | 24801.52 | 79655.55 | 41864.96 |
| 547.3329 | 9.147883 | 9.004633 | 9.172217 | 3  | 3 | 0 | 524250.1 | 676214.6 | 474872.6 |
| 414.2857 | 21.68025 | 21.5865  | 21.72217 | 10 | 5 | 5 | 196328.7 | 682196.6 | 641361.2 |
| 327.3819 | 35.02058 | 34.98317 | 35.04317 | 10 | 5 | 5 | 237004.9 | 907817.3 | 564384.5 |
| 403.002  | 15.90558 | 15.85218 | 15.91817 | 5  | 3 | 2 | 54554.74 | 332515.2 | 408771.5 |
| 666.3134 | 25.68617 | 25.66133 | 25.69883 | 5  | 1 | 4 | 289682.7 | 375999.5 | 797582.2 |
| 376.3217 | 19.61792 | 19.599   | 19.69467 | 8  | 3 | 5 | 98054.26 | 477058.6 | 327144.6 |
| 196.097  | 31.31617 | 31.20183 | 31.35667 | 7  | 3 | 4 | 176360.3 | 734266.1 | 701792.8 |
| 1289.95  | 25.24192 | 25.2255  | 25.28967 | 4  | 1 | 3 | 106399.3 | 462990   | 828776.9 |
| 592.2093 | 10.40667 | 10.38048 | 10.46653 | 6  | 3 | 3 | 2491413  | 1114114  | 1757000  |
| 332.28   | 23.19325 | 23.1585  | 23.21067 | 8  | 3 | 5 | 193741.8 | 501081.3 | 549281.2 |
| 426.9756 | 22.08917 | 22.00883 | 22.15117 | 4  | 1 | 3 | 38631.33 | 114184.3 | 35248.79 |
| 318.2799 | 19.88917 | 19.8615  | 19.99017 | 8  | 3 | 5 | 1179300  | 3748784  | 5441891  |
| 455.1844 | 24.34267 | 24.267   | 24.35717 | 7  | 2 | 5 | 232200.4 | 919373.5 | 1049136  |
| 338.263  | 24.89183 | 24.853   | 24.903   | 5  | 2 | 3 | 60560.58 | 184476.1 | 232332.2 |
| 207.1382 | 29.56408 | 29.52033 | 29.58317 | 4  | 0 | 4 | 466951.2 | 1220083  | 2287444  |
| 853.6288 | 9.4622   | 9.3803   | 9.515    | 6  | 3 | 3 | 5203824  | 9348215  | 16784217 |

|          |          |          |          |    |   |   |          |          |          |
|----------|----------|----------|----------|----|---|---|----------|----------|----------|
| 316.2489 | 17.7365  | 17.72083 | 17.76583 | 7  | 3 | 4 | 78378.6  | 335039.8 | 267771.4 |
| 234.0952 | 20.3595  | 20.33883 | 20.48633 | 9  | 4 | 5 | 107136.3 | 509041.3 | 513032.7 |
| 847.448  | 23.18042 | 23.09983 | 23.20917 | 8  | 4 | 4 | 540897.2 | 1164133  | 1586865  |
| 865.6533 | 36.51383 | 36.46917 | 36.53483 | 6  | 4 | 2 | 64730.25 | 190742.2 | 127758.2 |
| 600.2622 | 31.00867 | 30.918   | 31.10217 | 9  | 4 | 5 | 202660.7 | 668099.8 | 536235.4 |
| 306.0916 | 31.62325 | 31.5415  | 31.70567 | 8  | 3 | 5 | 119099.7 | 507231.7 | 573017.5 |
| 341.3168 | 31.0155  | 30.918   | 31.24883 | 10 | 4 | 4 | 1453923  | 26863618 | 17270573 |
| 292.6937 | 8.913142 | 8.747883 | 8.96825  | 4  | 3 | 1 | 259744.5 | 199911.1 | 154364.6 |
| 494.3249 | 26.66517 | 26.586   | 26.94067 | 12 | 5 | 5 | 2888034  | 20357629 | 21609996 |
| 293.1159 | 22.12717 | 22.05267 | 22.15067 | 9  | 4 | 5 | 996349.7 | 3833727  | 5288901  |
| 293.2605 | 28.42358 | 28.3985  | 28.45267 | 6  | 3 | 3 | 45727.73 | 151765.6 | 180276.1 |
| 675.4993 | 34.75883 | 34.73567 | 34.81033 | 6  | 2 | 4 | 67129.34 | 215436.7 | 298197.7 |
| 286.1889 | 22.06808 | 22.005   | 22.1075  | 6  | 3 | 3 | 99060.07 | 236947.2 | 252251.8 |
| 307.2486 | 22.21625 | 22.1325  | 22.24883 | 6  | 2 | 4 | 71771.3  | 180163.6 | 195746   |
| 410.0564 | 19.3495  | 19.29933 | 19.37867 | 5  | 2 | 3 | 93726.26 | 229838.1 | 331402   |
| 465.5129 | 39.69017 | 39.66883 | 39.74733 | 8  | 5 | 3 | 19981.93 | 79447.77 | 48594.65 |
| 327.0899 | 16.67767 | 16.62683 | 16.72017 | 8  | 3 | 5 | 259500.4 | 1106267  | 1458252  |
| 672.2453 | 22.61567 | 22.57133 | 22.65083 | 10 | 5 | 5 | 769332.8 | 3520324  | 3916220  |
| 351.7535 | 9.489217 | 9.365883 | 9.584433 | 8  | 5 | 3 | 72318248 | 2.06E+08 | 3.73E+08 |
| 442.3649 | 28.76083 | 28.73767 | 28.79017 | 7  | 3 | 4 | 85380.59 | 266243.5 | 319002.8 |
| 383.2261 | 33.42067 | 33.4195  | 33.42333 | 3  | 0 | 3 | 34631.99 | 108413.4 | 63495.2  |
| 455.1848 | 20.65483 | 20.5745  | 20.7355  | 9  | 4 | 5 | 2847205  | 14159583 | 17794770 |
| 594.1616 | 27.652   | 27.588   | 27.66333 | 7  | 3 | 4 | 119819.6 | 597061.8 | 535197.5 |
| 587.421  | 26.68133 | 26.655   | 26.723   | 7  | 3 | 4 | 76066.31 | 251909   | 320382.7 |
| 313.1801 | 25.533   | 25.48517 | 25.54083 | 4  | 4 | 0 | 258407   | 801266.3 | 1038395  |
| 661.2542 | 22.12717 | 22.03667 | 22.136   | 5  | 2 | 3 | 235495.7 | 455410.4 | 620166.5 |
| 456.1481 | 26.65383 | 26.6355  | 26.67933 | 5  | 2 | 3 | 59472.05 | 141984.2 | 190710.7 |
| 372.2157 | 9.537367 | 9.473767 | 9.6125   | 9  | 5 | 4 | 11146540 | 30803139 | 19333588 |
| 471.3322 | 30.00108 | 29.96617 | 30.01717 | 10 | 5 | 5 | 192368.8 | 1991774  | 394743.2 |
| 496.1384 | 10.66397 | 10.56983 | 10.77118 | 5  | 3 | 2 | 946315.3 | 1607702  | 2939793  |
| 370.7179 | 9.525933 | 9.394733 | 9.55075  | 4  | 1 | 3 | 2628015  | 3835861  | 5449763  |
| 362.2259 | 31.08092 | 30.9885  | 31.11333 | 8  | 4 | 4 | 143339.2 | 848812.8 | 582323.8 |
| 399.3097 | 27.22383 | 27.208   | 27.24383 | 5  | 3 | 2 | 50720.82 | 180363.8 | 130629.5 |
| 313.3216 | 23.49492 | 23.42917 | 23.58517 | 10 | 5 | 5 | 47911996 | 3.19E+08 | 3.3E+08  |
| 301.1414 | 30.84833 | 30.73283 | 30.90333 | 10 | 5 | 5 | 4707116  | 39105504 | 25548945 |
| 420.2021 | 23.5155  | 23.4585  | 23.56133 | 7  | 3 | 4 | 110630.9 | 469587.7 | 398680.3 |
| 660.2322 | 41.20783 | 41.1635  | 41.23617 | 7  | 3 | 4 | 43182.72 | 173008.2 | 149329.6 |
| 239.0625 | 22.10083 | 22.09783 | 22.12267 | 3  | 3 | 0 | 69841.78 | 501437.8 | 253281   |
| 591.7969 | 10.67828 | 10.599   | 10.77118 | 7  | 3 | 4 | 11119885 | 21272560 | 43925956 |
| 359.2549 | 16.00662 | 15.9803  | 16.01928 | 4  | 1 | 3 | 87729.42 | 226612.3 | 309390.9 |
| 285.0912 | 18.1315  | 18.08433 | 18.1595  | 10 | 5 | 5 | 987920.8 | 5079481  | 6167334  |
| 688.3396 | 20.65617 | 20.628   | 20.7015  | 5  | 2 | 3 | 325399.4 | 940542.7 | 1291015  |
| 494.4057 | 25.31533 | 25.26333 | 25.372   | 7  | 3 | 4 | 141751.3 | 402433.5 | 539060   |
| 270.7283 | 9.748592 | 9.7252   | 9.7788   | 6  | 3 | 3 | 344237.6 | 518965.2 | 915008.4 |
| 753.6272 | 34.83525 | 34.81217 | 34.88117 | 6  | 4 | 2 | 145585.6 | 551866   | 338269.4 |
| 464.0459 | 22.82667 | 22.76417 | 23.02483 | 7  | 3 | 4 | 94541.39 | 208285.6 | 296242.1 |
| 325.2492 | 11.65528 | 11.62662 | 11.80495 | 7  | 2 | 5 | 3094807  | 6824339  | 10801086 |

|          |          |          |          |    |   |   |          |          |          |
|----------|----------|----------|----------|----|---|---|----------|----------|----------|
| 321.0264 | 17.14042 | 17.06583 | 17.19917 | 6  | 2 | 4 | 195386.9 | 1034584  | 659286.4 |
| 634.9974 | 20.99217 | 20.89033 | 21.0485  | 5  | 2 | 3 | 224553.8 | 1325171  | 1827952  |
| 334.0745 | 19.69017 | 19.65883 | 19.7825  | 7  | 2 | 5 | 244161.9 | 636440.6 | 1183830  |
| 789.614  | 44.94333 | 44.91    | 44.975   | 10 | 5 | 5 | 485459   | 3211176  | 1483796  |
| 442.1317 | 21.7175  | 21.57183 | 21.74217 | 6  | 2 | 4 | 123767.5 | 357468.7 | 486196.9 |
| 444.086  | 18.10342 | 18.07617 | 18.155   | 4  | 1 | 3 | 190767   | 517399.2 | 839405.5 |
| 846.6176 | 42.2     | 42.1605  | 42.262   | 3  | 0 | 3 | 19860.93 | 100354.5 | 53606.4  |
| 720.4154 | 20.45075 | 20.411   | 20.588   | 6  | 2 | 4 | 206572   | 570049.3 | 734425.6 |
| 537.0707 | 19.70183 | 19.67567 | 19.7185  | 5  | 1 | 4 | 351008.4 | 750139.6 | 1564828  |
| 293.2883 | 34.71333 | 34.67483 | 34.71883 | 8  | 4 | 4 | 251222.9 | 1044727  | 1252957  |
| 395.1159 | 19.68733 | 19.6445  | 19.7335  | 5  | 2 | 3 | 129223.3 | 289071.6 | 521500   |
| 434.2564 | 11.4726  | 11.36578 | 11.67042 | 7  | 3 | 4 | 954490.9 | 2599591  | 4836185  |
| 247.2272 | 28.21783 | 28.1925  | 28.23483 | 10 | 5 | 5 | 6497417  | 40482637 | 41533808 |
| 491.3275 | 26.25567 | 26.23333 | 26.31183 | 5  | 2 | 3 | 55074.9  | 188622.6 | 168589.5 |
| 210.1572 | 18.45825 | 18.40333 | 18.51233 | 6  | 3 | 3 | 28783.88 | 83139.35 | 81388.47 |
| 516.0543 | 20.6415  | 20.61367 | 20.74433 | 5  | 2 | 3 | 77777.45 | 263160.4 | 359593.6 |
| 320.0416 | 19.625   | 19.5915  | 19.65933 | 10 | 5 | 5 | 248484.1 | 1137449  | 1248741  |
| 289.2016 | 16.78417 | 16.75333 | 16.793   | 8  | 4 | 4 | 75879.68 | 353602.8 | 292063   |
| 223.112  | 23.92567 | 23.86867 | 23.959   | 5  | 2 | 3 | 330121.7 | 1072125  | 1085233  |
| 553.1478 | 10.67828 | 10.62147 | 10.7363  | 5  | 3 | 2 | 238049.3 | 505915.9 | 525856.8 |
| 542.325  | 26.86817 | 26.81367 | 26.919   | 10 | 5 | 5 | 4963915  | 23222469 | 21363470 |
| 347.2568 | 21.444   | 21.32883 | 21.46    | 5  | 2 | 3 | 294095.6 | 1472004  | 1484295  |
| 312.2981 | 36.61967 | 36.60717 | 36.6405  | 7  | 3 | 4 | 289412   | 1884226  | 1636556  |
| 398.3633 | 24.1655  | 24.0315  | 24.17967 | 5  | 2 | 3 | 47459.29 | 204140.9 | 250306.4 |
| 302.1448 | 30.84833 | 30.73283 | 30.88867 | 10 | 5 | 5 | 829445.8 | 5276709  | 4185208  |
| 401.4561 | 10.42883 | 10.36557 | 10.49363 | 4  | 1 | 3 | 1899392  | 2447822  | 2406952  |
| 385.2001 | 10.67342 | 10.63755 | 10.77118 | 8  | 4 | 4 | 8787765  | 32292913 | 39252398 |
| 365.346  | 40.76017 | 40.75133 | 40.82583 | 5  | 2 | 3 | 19808.28 | 89020.37 | 21397.81 |
| 344.3358 | 22.3995  | 22.34333 | 22.42333 | 9  | 4 | 5 | 216735   | 838503.6 | 916660.4 |
| 382.3152 | 22.905   | 22.88667 | 22.9175  | 6  | 2 | 4 | 44812.31 | 135183.9 | 140109.7 |
| 609.4001 | 11.02217 | 10.95727 | 11.1665  | 9  | 4 | 5 | 3005239  | 10530763 | 12956618 |
| 434.2747 | 44.97467 | 44.94467 | 44.97533 | 3  | 3 | 0 | 44357.95 | 261239.6 | 69124.15 |
| 400.2854 | 22.01283 | 21.94167 | 22.0505  | 7  | 3 | 4 | 104113.2 | 321209.5 | 346767.9 |
| 461.2115 | 23.86858 | 23.84333 | 23.9     | 6  | 2 | 4 | 54643.54 | 173971.6 | 215017.9 |
| 444.4002 | 18.113   | 18.08433 | 18.158   | 5  | 3 | 2 | 84076.21 | 199908.2 | 190701.9 |
| 436.9968 | 23.00492 | 22.97417 | 23.01883 | 6  | 2 | 4 | 127579.3 | 402005.3 | 547994.4 |
| 273.1852 | 28.74617 | 28.65783 | 28.76483 | 5  | 3 | 2 | 175936.8 | 846582.9 | 810582.8 |
| 314.151  | 32.75808 | 32.693   | 32.838   | 4  | 1 | 3 | 61248.15 | 142850.9 | 231063.8 |
| 256.0643 | 19.3515  | 19.32383 | 19.37867 | 10 | 5 | 5 | 2481397  | 14589026 | 14199656 |
| 422.3483 | 21.6545  | 21.44083 | 21.87883 | 9  | 2 | 4 | 47052.32 | 133046.2 | 114714.9 |
| 459.2157 | 23.86133 | 23.79267 | 23.89933 | 7  | 3 | 4 | 150991.5 | 694745   | 706876   |
| 572.2648 | 29.159   | 29.09717 | 29.24117 | 6  | 2 | 4 | 61251.3  | 347317   | 169478.4 |
| 277.144  | 19.51625 | 19.341   | 19.57117 | 10 | 5 | 5 | 1222971  | 6383579  | 5401349  |
| 300.199  | 8.906483 | 8.677417 | 8.9755   | 8  | 5 | 3 | 2397293  | 7769343  | 6283069  |
| 262.246  | 31.52775 | 31.49917 | 31.57083 | 8  | 4 | 4 | 114555.8 | 543541.8 | 458554.2 |
| 603.1108 | 20.65667 | 20.599   | 20.7015  | 5  | 2 | 3 | 115800.9 | 351232.7 | 487015.2 |
| 542.0103 | 19.34717 | 19.33867 | 19.3495  | 4  | 1 | 3 | 66193.65 | 126716.6 | 171832.1 |

|          |          |          |          |    |   |   |          |          |          |
|----------|----------|----------|----------|----|---|---|----------|----------|----------|
| 171.1381 | 39.744   | 39.64917 | 39.79133 | 6  | 3 | 3 | 132539.9 | 1505683  | 333786.2 |
| 468.3091 | 26.21758 | 26.15833 | 26.30383 | 10 | 5 | 5 | 6433913  | 32479324 | 28919842 |
| 399.333  | 8.905742 | 8.6058   | 9.0047   | 8  | 3 | 4 | 903814.4 | 937398.9 | 1214348  |
| 444.184  | 27.01333 | 26.97483 | 27.03167 | 5  | 2 | 3 | 32117.65 | 117072.4 | 108053.4 |
| 431.0129 | 22.14592 | 22.05267 | 22.15117 | 6  | 2 | 4 | 408974.5 | 1137942  | 1715102  |
| 381.3117 | 16.57595 | 16.55567 | 16.59778 | 10 | 5 | 5 | 166617.3 | 785163.5 | 735693.9 |
| 486.1091 | 18.12083 | 18.01233 | 18.158   | 8  | 3 | 5 | 432237.7 | 1164044  | 1927849  |
| 268.0998 | 23.06083 | 22.99133 | 23.07517 | 4  | 1 | 3 | 615110.1 | 4013520  | 6651770  |
| 502.3147 | 20.11383 | 20.10683 | 20.1235  | 5  | 1 | 4 | 80242.95 | 252729.4 | 431619.2 |
| 381.3115 | 22.90833 | 22.88367 | 22.92417 | 10 | 5 | 5 | 245666.2 | 879552.5 | 904760.5 |
| 635.4006 | 10.00425 | 9.93755  | 10.04445 | 7  | 4 | 3 | 17798376 | 20994941 | 30191011 |
| 540.3872 | 43.8635  | 43.8495  | 43.879   | 9  | 5 | 4 | 75725.73 | 615845   | 117770.7 |
| 848.4514 | 23.19442 | 23.16617 | 23.21    | 6  | 2 | 4 | 135687   | 295845.3 | 387283.5 |
| 580.4005 | 29.89275 | 29.88567 | 29.89933 | 4  | 1 | 3 | 26619.44 | 74946.02 | 81419.31 |
| 300.0728 | 22.6605  | 22.60367 | 22.68083 | 10 | 5 | 5 | 943101.4 | 5233490  | 5354289  |
| 673.2487 | 22.60833 | 22.56283 | 22.65083 | 10 | 5 | 5 | 293823.8 | 1269529  | 1423922  |
| 548.4075 | 33.13417 | 33.099   | 33.1875  | 5  | 0 | 5 | 541244.8 | 1824467  | 1611778  |
| 476.3292 | 7.457217 | 7.3532   | 7.670483 | 6  | 2 | 3 | 4.87E+08 | 1.87E+09 | 3.43E+09 |
| 214.07   | 19.3495  | 19.32383 | 19.37217 | 9  | 4 | 5 | 118702   | 514347.3 | 465661.3 |
| 435.0012 | 23.00017 | 22.943   | 23.01883 | 8  | 3 | 5 | 296677.8 | 1186313  | 1562424  |
| 238.1885 | 31.716   | 31.55617 | 31.76383 | 5  | 2 | 3 | 54361.02 | 162119.1 | 154334.3 |
| 412.068  | 20.0025  | 19.96167 | 20.10783 | 7  | 3 | 4 | 89582.88 | 423089.6 | 466055.2 |
| 314.325  | 23.49492 | 23.42917 | 23.6005  | 10 | 5 | 5 | 10199564 | 67036270 | 69738398 |
| 519.0591 | 22.75517 | 22.70417 | 22.79867 | 6  | 2 | 4 | 78274.6  | 292252.8 | 249025.9 |
| 319.1872 | 22.16775 | 22.05267 | 22.19417 | 10 | 5 | 5 | 649244.3 | 2573366  | 2952656  |
| 362.987  | 8.9449   | 8.765467 | 8.99255  | 5  | 4 | 1 | 532300.1 | 547185.8 | 279174.5 |
| 306.3069 | 27.94167 | 27.88167 | 28.05717 | 9  | 4 | 5 | 117494.8 | 498138.6 | 482547.1 |
| 652.8622 | 23.00258 | 22.9495  | 23.01883 | 6  | 1 | 5 | 106692.6 | 244557.7 | 433578.2 |
| 504.3092 | 29.98758 | 29.97433 | 30.059   | 6  | 3 | 3 | 56582.21 | 234736.6 | 214891.4 |
| 535.0055 | 30.76225 | 30.48833 | 30.84967 | 6  | 2 | 4 | 141624.9 | 336218.3 | 646427.4 |
| 494.277  | 24.269   | 24.23967 | 24.269   | 3  | 0 | 3 | 60839.38 | 319740.4 | 97292.08 |
| 337.2322 | 9.193308 | 9.101033 | 9.280533 | 8  | 5 | 3 | 2107322  | 5237410  | 4089096  |
| 238.1887 | 25.1385  | 25.08833 | 25.1525  | 5  | 3 | 2 | 103363.6 | 234998.4 | 226639.1 |
| 673.2489 | 25.71983 | 25.68983 | 25.73833 | 8  | 4 | 4 | 170258.1 | 791082.7 | 921249.5 |
| 658.511  | 35.1325  | 35.116   | 35.20567 | 7  | 3 | 4 | 949065.8 | 18640121 | 26890681 |
| 407.1059 | 12.95803 | 12.87568 | 13.05475 | 5  | 1 | 4 | 71097.53 | 167086.3 | 331314.1 |
| 388.1418 | 19.69725 | 19.66317 | 19.8175  | 8  | 3 | 5 | 337575.4 | 930288.7 | 1639762  |
| 771.3838 | 41.20783 | 41.16333 | 41.25083 | 9  | 4 | 5 | 75525.92 | 347656.2 | 266800.2 |
| 697.2031 | 9.500283 | 9.473767 | 9.645817 | 5  | 3 | 2 | 2704279  | 8807498  | 12135073 |
| 360.9551 | 21.72217 | 21.68167 | 21.7275  | 3  | 0 | 3 | 60177.27 | 220599.1 | 300953.5 |
| 290.2773 | 37.82467 | 37.782   | 37.8885  | 6  | 2 | 4 | 80746.22 | 349400.5 | 403416.7 |
| 505.2449 | 20.42608 | 20.3965  | 20.588   | 8  | 3 | 5 | 623569.9 | 2150440  | 2800453  |
| 660.1315 | 18.11058 | 18.07617 | 18.155   | 4  | 1 | 3 | 177212.6 | 446334.7 | 758536.3 |
| 397.0952 | 22.74708 | 22.71633 | 22.78383 | 6  | 4 | 2 | 941396.6 | 990840.7 | 1052987  |
| 278.1472 | 19.43825 | 19.29417 | 19.5465  | 8  | 4 | 3 | 163922.2 | 659966.7 | 716216.7 |
| 631.4472 | 26.71033 | 26.699   | 26.73967 | 7  | 3 | 4 | 79121.46 | 272371.4 | 340889   |
| 275.2584 | 34.71467 | 34.679   | 34.72933 | 10 | 5 | 5 | 2621771  | 14672394 | 15493982 |

|          |          |          |          |    |   |   |          |          |          |
|----------|----------|----------|----------|----|---|---|----------|----------|----------|
| 818.5857 | 24.46392 | 24.44267 | 24.52033 | 4  | 1 | 3 | 155524.1 | 574310.1 | 763447.4 |
| 1154.526 | 30.14875 | 30.07333 | 30.17    | 8  | 4 | 4 | 87361.29 | 365701.7 | 371036   |
| 212.0743 | 19.3515  | 19.32383 | 19.37867 | 10 | 5 | 5 | 3252822  | 19832504 | 18871509 |
| 476.1583 | 14.55192 | 14.5226  | 14.60108 | 4  | 1 | 3 | 41125.54 | 170308.8 | 175810.6 |
| 774.2019 | 30.27883 | 30.24433 | 30.30783 | 4  | 1 | 3 | 49571.88 | 85939.05 | 136551.8 |
| 312.2539 | 29.64233 | 29.6075  | 29.65167 | 7  | 3 | 4 | 190659.4 | 1093000  | 855302.1 |
| 815.5266 | 29.63683 | 29.57833 | 29.66617 | 6  | 3 | 3 | 651678.6 | 1187727  | 1669456  |
| 224.1729 | 21.38017 | 21.261   | 21.40517 | 9  | 4 | 5 | 143005   | 675146.9 | 692966.6 |
| 595.8019 | 29.14033 | 29.11167 | 29.22633 | 5  | 2 | 3 | 234906   | 595114.9 | 793097.1 |
| 527.1357 | 18.11767 | 18.09117 | 18.1585  | 7  | 3 | 4 | 206768.3 | 734872.4 | 1102135  |
| 472.1171 | 22.136   | 22.05267 | 22.14983 | 5  | 1 | 4 | 260151.1 | 585589   | 940564   |
| 383.1673 | 29.15192 | 29.11083 | 29.19683 | 4  | 1 | 3 | 52509.37 | 119342.1 | 60641.99 |
| 314.9801 | 22.99025 | 22.928   | 23.01883 | 8  | 3 | 5 | 275470.9 | 1015060  | 1363093  |
| 365.9622 | 11.01367 | 10.81963 | 11.09677 | 6  | 2 | 3 | 102749.5 | 283771.8 | 356963.2 |
| 228.2042 | 21.578   | 21.45517 | 21.60283 | 10 | 5 | 5 | 352764.4 | 2016367  | 2010487  |
| 267.2108 | 38.86808 | 38.8515  | 38.89767 | 4  | 0 | 4 | 65443.26 | 258707.4 | 27124.41 |
| 389.0327 | 16.96167 | 16.9075  | 16.99883 | 7  | 2 | 5 | 135222.3 | 470369.1 | 866873.2 |
| 477.3459 | 33.7825  | 33.75883 | 33.86767 | 6  | 2 | 4 | 182041.3 | 739958.1 | 954783.1 |
| 427.306  | 29.96917 | 29.9205  | 30.00317 | 10 | 5 | 5 | 140626.1 | 1484698  | 340485.7 |
| 329.3038 | 26.609   | 26.54567 | 26.65017 | 5  | 2 | 3 | 72597.18 | 384313.7 | 489051.4 |
| 494.3245 | 28.8315  | 28.8055  | 28.894   | 7  | 4 | 3 | 1788361  | 4160006  | 4366602  |
| 326.3251 | 37.41183 | 37.40483 | 37.52267 | 4  | 3 | 1 | 18364.57 | 82043.24 | 54473.25 |
| 531.1287 | 10.6789  | 10.58428 | 10.77893 | 7  | 3 | 4 | 2355303  | 3722562  | 6680533  |
| 175.112  | 28.13233 | 28.02967 | 28.176   | 5  | 2 | 3 | 109639   | 531761.1 | 481763.5 |
| 437.1939 | 21.48058 | 21.39833 | 21.52033 | 10 | 5 | 5 | 383038   | 1158981  | 829122.4 |
| 814.5234 | 29.637   | 29.57833 | 29.6665  | 9  | 5 | 4 | 1722573  | 3218821  | 4474276  |
| 418.2553 | 8.891942 | 8.695117 | 8.9437   | 4  | 3 | 1 | 110053.1 | 142271.3 | 79704.91 |
| 355.2249 | 28.717   | 28.65783 | 28.753   | 10 | 5 | 5 | 295337.3 | 1198109  | 1204315  |
| 162.0842 | 32.51217 | 32.3575  | 32.52517 | 5  | 2 | 3 | 50638.66 | 180667.8 | 220029.2 |
| 372.717  | 9.54735  | 9.47815  | 9.596683 | 6  | 4 | 2 | 4903386  | 14692007 | 6392173  |
| 691.2212 | 30.41325 | 30.34733 | 30.47117 | 4  | 1 | 3 | 136557.6 | 208528.3 | 441283.3 |
| 729.5266 | 10.2045  | 10.1582  | 10.2073  | 3  | 0 | 3 | 263643.3 | 178955.1 | 289727.2 |
| 386.3421 | 24.03942 | 24.0235  | 24.04767 | 4  | 1 | 3 | 244920   | 1171678  | 1257541  |
| 337.2872 | 28.61467 | 28.568   | 28.62833 | 6  | 2 | 4 | 51730.01 | 145760.1 | 179685.2 |
| 879.6113 | 33.92275 | 33.90517 | 33.94467 | 4  | 1 | 3 | 61123.4  | 204134.9 | 179441.7 |
| 526.4318 | 35.434   | 35.42017 | 35.48767 | 7  | 3 | 4 | 786438.1 | 13596564 | 20921557 |
| 453.169  | 26.65392 | 26.586   | 26.68133 | 8  | 3 | 5 | 195107   | 764466.8 | 920713.1 |
| 436.1426 | 19.70283 | 19.69017 | 19.71067 | 4  | 1 | 3 | 67511.51 | 151420.3 | 292640.1 |
| 557.0903 | 20.65483 | 20.59733 | 20.716   | 3  | 0 | 3 | 88611.9  | 244113.2 | 347909   |
| 414.3698 | 22.71633 | 22.65483 | 22.73267 | 5  | 2 | 3 | 47827.87 | 70519.71 | 78293.39 |
| 321.1669 | 30.54367 | 30.4615  | 30.59067 | 7  | 3 | 4 | 103866.6 | 414243.1 | 410260.8 |
| 450.3224 | 20.42042 | 20.3615  | 20.588   | 10 | 5 | 5 | 2889636  | 13262801 | 12616871 |
| 377.2294 | 41.00267 | 40.96717 | 41.08867 | 7  | 3 | 4 | 33031.71 | 276516   | 117817.3 |
| 270.1493 | 24.59133 | 24.56467 | 24.653   | 7  | 3 | 4 | 113608.2 | 392569.6 | 451038.7 |
| 351.2519 | 9.500283 | 9.473767 | 9.584433 | 7  | 4 | 3 | 1.84E+08 | 5.63E+08 | 8.96E+08 |
| 328.3214 | 36.61133 | 36.60133 | 36.65217 | 7  | 3 | 4 | 180962.8 | 1391977  | 1303405  |
| 639.2731 | 32.12933 | 32.10267 | 32.16167 | 5  | 3 | 2 | 128785   | 466419.4 | 507837.2 |

|          |          |          |          |    |   |   |          |          |          |
|----------|----------|----------|----------|----|---|---|----------|----------|----------|
| 397.2013 | 23.18217 | 23.10367 | 23.1955  | 10 | 5 | 5 | 158179.2 | 678607.7 | 576918   |
| 327.1962 | 32.07183 | 31.95683 | 32.08817 | 5  | 3 | 2 | 46778.05 | 212290.4 | 111198.3 |
| 478.0234 | 22.98758 | 22.928   | 23.01883 | 8  | 3 | 5 | 277431.6 | 1055838  | 1405359  |
| 458.348  | 24.12925 | 24.021   | 24.19517 | 10 | 5 | 5 | 186510.1 | 715804   | 764433.4 |
| 209.1538 | 26.338   | 26.24733 | 26.38283 | 7  | 3 | 4 | 422946.9 | 2249827  | 2221324  |
| 204.1103 | 28.14717 | 28.05933 | 28.1765  | 9  | 4 | 5 | 183567.2 | 936082.4 | 840222.7 |
| 364.2042 | 10.76447 | 10.64867 | 10.85075 | 5  | 1 | 3 | 21104736 | 25252401 | 40028454 |
| 344.28   | 23.23867 | 23.21    | 23.322   | 9  | 4 | 5 | 90900.73 | 338987.5 | 361148.2 |
| 390.1371 | 19.68942 | 19.67333 | 19.7825  | 10 | 5 | 5 | 6315277  | 19578124 | 33532229 |
| 456.1881 | 20.64217 | 20.605   | 20.7355  | 9  | 4 | 5 | 672581.6 | 2764066  | 3468949  |
| 461.3743 | 27.736   | 27.7015  | 27.80367 | 5  | 2 | 3 | 297166.5 | 1881188  | 2005586  |
| 611.4375 | 34.98383 | 34.93717 | 35.00867 | 7  | 3 | 4 | 115215.1 | 501164.1 | 634876.6 |
| 316.2568 | 39.577   | 39.52983 | 39.606   | 6  | 2 | 4 | 141550.6 | 596962   | 701304.7 |
| 512.1405 | 22.1215  | 22.05267 | 22.14983 | 8  | 3 | 5 | 8707132  | 24913941 | 39531576 |
| 309.1267 | 22.26717 | 22.21317 | 22.28967 | 7  | 2 | 5 | 1412846  | 9440167  | 12390226 |
| 491.1501 | 27.46833 | 27.43983 | 27.7505  | 6  | 3 | 2 | 53902.54 | 278878.9 | 249494.1 |
| 258.2067 | 19.666   | 19.64317 | 19.73    | 3  | 0 | 3 | 27625.64 | 74107.75 | 61386.03 |
| 515.3343 | 29.80792 | 29.78483 | 29.81883 | 6  | 3 | 3 | 48177.34 | 188828.3 | 186418.4 |
| 498.0155 | 19.03583 | 18.76583 | 19.08533 | 4  | 1 | 3 | 37072.13 | 72145.9  | 99328.1  |
| 307.2062 | 22.74267 | 22.71833 | 22.78383 | 7  | 3 | 4 | 116730.8 | 323377.5 | 422954.1 |
| 836.5731 | 11.48722 | 11.38147 | 11.55502 | 5  | 2 | 3 | 176510.1 | 630328.7 | 844480.2 |
| 679.5629 | 31.53483 | 31.45917 | 31.62867 | 6  | 4 | 2 | 87276.31 | 249219.3 | 281879.9 |
| 283.1755 | 28.7755  | 28.7625  | 28.78033 | 5  | 2 | 3 | 185041.7 | 1408418  | 736963.4 |
| 287.278  | 25.02592 | 24.9975  | 25.053   | 10 | 5 | 5 | 944633.7 | 3271542  | 3849834  |
| 508.2551 | 23.195   | 23.16267 | 23.26733 | 6  | 3 | 3 | 60239.63 | 229524.7 | 153973   |
| 568.4127 | 31.28733 | 31.1835  | 31.33367 | 4  | 3 | 1 | 65014.69 | 290489   | 166040   |
| 336.1261 | 24.34375 | 24.25583 | 24.359   | 8  | 3 | 5 | 326156.3 | 1086469  | 1450089  |
| 399.1784 | 38.86817 | 38.83883 | 38.86817 | 3  | 0 | 3 | 49505.11 | 214480.5 | 93071.86 |
| 499.277  | 26.44483 | 26.41383 | 26.47767 | 7  | 4 | 3 | 237048.9 | 624739.5 | 778612.7 |
| 525.2977 | 30.979   | 30.92183 | 31.07383 | 5  | 2 | 3 | 79838.77 | 187769.6 | 221175.4 |
| 241.0499 | 26.903   | 26.86317 | 26.95817 | 6  | 2 | 4 | 330560.6 | 1447707  | 1731143  |
| 534.0648 | 20.96633 | 20.91867 | 20.99367 | 5  | 1 | 4 | 97036.09 | 440166.4 | 624454.4 |
| 359.1158 | 21.76617 | 21.7285  | 21.83617 | 7  | 2 | 5 | 96024.07 | 303006.5 | 403111.7 |
| 472.3486 | 22.67567 | 22.62467 | 22.71033 | 7  | 2 | 5 | 143422.4 | 542698.8 | 516762   |
| 457.1802 | 20.64217 | 20.61367 | 20.7355  | 9  | 4 | 5 | 1033850  | 4810366  | 6158990  |
| 434.7579 | 11.48722 | 11.4717  | 11.64007 | 5  | 1 | 4 | 494042.9 | 1312288  | 2283837  |
| 380.28   | 24.13    | 24.066   | 24.15    | 6  | 2 | 4 | 128586.5 | 424578.6 | 492784.6 |
| 315.1456 | 22.15025 | 22.11583 | 22.15117 | 4  | 1 | 3 | 69843.25 | 144439.1 | 178370.6 |
| 196.1416 | 19.538   | 19.51717 | 19.57117 | 6  | 2 | 4 | 30927.1  | 113630.9 | 95714.22 |
| 341.7515 | 9.483542 | 9.444983 | 9.537367 | 4  | 1 | 3 | 4249719  | 7795398  | 4521852  |
| 416.297  | 17.5955  | 17.58967 | 17.60533 | 7  | 3 | 4 | 403268.5 | 1795468  | 2048406  |
| 471.3799 | 25.55567 | 25.48867 | 25.86233 | 11 | 5 | 5 | 839826.7 | 4466227  | 4791628  |
| 463.3263 | 10.04878 | 9.972517 | 10.0679  | 5  | 3 | 2 | 1005216  | 1363332  | 2411904  |
| 317.1418 | 18.1035  | 18.04133 | 18.1725  | 7  | 3 | 4 | 66873.36 | 305177   | 394682.9 |
| 535.2812 | 7.4501   | 7.40945  | 7.465517 | 5  | 2 | 3 | 2643505  | 3899796  | 8237785  |
| 517.354  | 29.6365  | 29.61417 | 29.66617 | 7  | 4 | 3 | 60026.16 | 431846.6 | 92163.59 |
| 533.284  | 7.4501   | 7.40945  | 7.465517 | 5  | 2 | 3 | 8617697  | 15108892 | 30219648 |

|          |          |          |          |    |   |   |          |          |          |
|----------|----------|----------|----------|----|---|---|----------|----------|----------|
| 478.3535 | 22.49367 | 22.45467 | 22.52717 | 7  | 3 | 4 | 164791.2 | 484710   | 570931   |
| 295.1909 | 22.42883 | 22.35967 | 22.45317 | 7  | 3 | 4 | 219377.7 | 1318130  | 1037843  |
| 666.5103 | 37.41183 | 37.38067 | 37.6065  | 8  | 4 | 4 | 110367.6 | 561863.3 | 552493   |
| 591.0502 | 22.1355  | 22.03667 | 22.142   | 7  | 2 | 5 | 220301   | 878885.8 | 1220151  |
| 572.3029 | 29.199   | 29.12383 | 29.2705  | 7  | 3 | 4 | 335712.7 | 1118679  | 1210395  |
| 448.3202 | 20.51067 | 20.4835  | 20.62317 | 5  | 2 | 3 | 80674.7  | 241544.3 | 142772.5 |
| 395.2987 | 27.74833 | 27.74317 | 27.76167 | 4  | 3 | 1 | 42773.25 | 144909.3 | 162880.3 |
| 367.739  | 9.56285  | 9.537367 | 9.603217 | 3  | 0 | 3 | 3.26E+08 | 2.65E+08 | 3.66E+08 |
| 705.828  | 9.50155  | 9.435533 | 9.577667 | 6  | 3 | 3 | 2484169  | 7736899  | 11477726 |
| 577.4222 | 10.11443 | 9.759183 | 10.1429  | 9  | 5 | 4 | 2147942  | 2281326  | 3508391  |
| 495.328  | 27.76292 | 27.724   | 27.84883 | 6  | 2 | 4 | 2352822  | 13684860 | 12048562 |
| 356.1895 | 43.59542 | 43.57267 | 43.63067 | 8  | 3 | 5 | 123845.2 | 892361.1 | 870064   |
| 472.3178 | 9.20005  | 9.101033 | 9.266617 | 7  | 5 | 2 | 11939454 | 18369193 | 20871541 |
| 454.3291 | 10.03412 | 9.957467 | 10.05612 | 5  | 3 | 2 | 11083470 | 32737671 | 54024820 |
| 417.1975 | 7.421633 | 7.37795  | 7.4376   | 5  | 2 | 3 | 563456.1 | 778024.5 | 1535449  |
| 393.1007 | 22.77475 | 22.70417 | 22.8605  | 6  | 2 | 3 | 54989.7  | 128512.6 | 174879.7 |
| 395.2992 | 21.3145  | 21.22133 | 21.3215  | 3  | 0 | 3 | 53961.75 | 117051.4 | 105131.1 |
| 317.2339 | 22.965   | 22.8985  | 22.996   | 7  | 4 | 3 | 108431.8 | 515966.5 | 523163.7 |
| 548.2713 | 21.12033 | 21.03467 | 21.15517 | 9  | 4 | 5 | 149374.6 | 607279.1 | 583975.2 |
| 451.1127 | 9.214225 | 9.101033 | 9.429067 | 10 | 5 | 4 | 7147561  | 17505934 | 12128718 |
| 521.3676 | 40.43133 | 40.40733 | 40.50383 | 9  | 4 | 5 | 59370.4  | 283790.9 | 212131.6 |
| 692.225  | 30.41067 | 30.3515  | 30.48567 | 4  | 1 | 3 | 64296.53 | 73832.05 | 157696.6 |
| 314.2482 | 29.28517 | 29.23333 | 29.30117 | 7  | 3 | 4 | 71870.16 | 263694.3 | 284847.4 |
| 241.0499 | 22.48317 | 22.441   | 22.53283 | 7  | 3 | 4 | 1347969  | 6586305  | 6893876  |
| 496.396  | 30.9645  | 30.81667 | 31.26483 | 5  | 3 | 1 | 688093.3 | 1416400  | 1643893  |
| 575.4213 | 32.17525 | 32.1315  | 32.2465  | 4  | 3 | 1 | 69158.16 | 148527.1 | 109638   |
| 532.3407 | 29.712   | 29.70933 | 29.8265  | 9  | 5 | 4 | 155768.3 | 735262.5 | 683125.7 |
| 325.3217 | 23.28875 | 23.244   | 23.353   | 10 | 5 | 5 | 251510.9 | 965251.1 | 1028240  |
| 363.3089 | 10.68325 | 10.63755 | 10.7931  | 6  | 3 | 3 | 358762.8 | 703672.2 | 603835.1 |
| 300.2902 | 27.639   | 27.59983 | 27.66717 | 9  | 4 | 5 | 141760   | 679374.8 | 565283.4 |
| 433.3817 | 24.61117 | 24.56467 | 24.66767 | 6  | 3 | 3 | 63534.15 | 237196.4 | 289775.3 |
| 793.2712 | 25.728   | 25.69217 | 25.76267 | 6  | 3 | 3 | 78277.2  | 278007.7 | 347762.8 |
| 277.2378 | 25.21225 | 25.1645  | 25.25183 | 8  | 4 | 4 | 212311.2 | 752653   | 906717.4 |
| 252.0892 | 22.12592 | 22.05267 | 22.14983 | 8  | 3 | 5 | 999607.2 | 3521880  | 4923046  |
| 237.0598 | 27.8825  | 27.79317 | 27.93117 | 6  | 3 | 3 | 61916.76 | 284748.2 | 187363.8 |
| 472.3832 | 25.53583 | 25.474   | 25.5705  | 9  | 4 | 5 | 201568.7 | 977469.4 | 1087521  |
| 458.3384 | 12.84528 | 12.81465 | 12.90078 | 4  | 3 | 1 | 102031.1 | 176932.1 | 305417.1 |
| 864.9959 | 22.99025 | 22.97417 | 23.01033 | 6  | 2 | 4 | 209260.8 | 494444   | 697258.5 |
| 470.4482 | 39.69758 | 39.6695  | 39.922   | 10 | 5 | 5 | 208358.2 | 1503997  | 697131.6 |
| 398.0585 | 25.68417 | 25.63817 | 25.70383 | 7  | 3 | 4 | 86478.15 | 269275   | 365691.5 |
| 290.1796 | 22.75367 | 22.70783 | 22.78383 | 10 | 5 | 5 | 1959888  | 8444845  | 10252625 |
| 492.3457 | 21.32033 | 21.24767 | 21.33217 | 5  | 3 | 2 | 76618.48 | 290320.4 | 189828.5 |
| 656.4675 | 34.7595  | 34.73667 | 34.7925  | 4  | 1 | 3 | 41391.16 | 109916.3 | 157020.6 |
| 179.0641 | 9.282383 | 9.148317 | 9.335967 | 6  | 3 | 3 | 641329.7 | 2755043  | 2936740  |
| 431.2676 | 18.94583 | 18.92483 | 18.98233 | 8  | 3 | 5 | 125848.3 | 483554.2 | 510015.7 |
| 175.0756 | 27.1315  | 27.028   | 27.1935  | 6  | 3 | 3 | 49643.83 | 230744.4 | 189793.9 |
| 399.2235 | 29.60292 | 29.52117 | 29.637   | 4  | 1 | 3 | 45457100 | 23010103 | 39325256 |

|          |          |          |          |    |   |   |          |          |          |
|----------|----------|----------|----------|----|---|---|----------|----------|----------|
| 397.0337 | 16.91617 | 16.84967 | 16.957   | 4  | 1 | 3 | 45516.04 | 132930   | 155917.9 |
| 332.2312 | 23.78217 | 23.72133 | 23.8255  | 3  | 0 | 3 | 42148.86 | 156708.3 | 40116.53 |
| 459.3517 | 24.16483 | 23.99933 | 24.19517 | 7  | 3 | 4 | 43886.38 | 119836.4 | 156087   |
| 223.1697 | 21.39475 | 21.261   | 21.42917 | 10 | 5 | 5 | 1356733  | 7219573  | 7249452  |
| 886.6038 | 29.7195  | 29.66617 | 29.7425  | 7  | 3 | 4 | 32239.49 | 171991.4 | 25195.99 |
| 588.9127 | 10.11891 | 10.0301  | 10.12872 | 4  | 3 | 1 | 334687.6 | 282505.4 | 463337.3 |
| 310.2019 | 24.416   | 24.3855  | 24.47583 | 7  | 3 | 4 | 92542.58 | 342824.2 | 372812   |
| 240.2688 | 32.77633 | 32.741   | 32.835   | 10 | 5 | 5 | 335598.4 | 1807282  | 1102072  |
| 362.2696 | 20.84608 | 20.83167 | 20.86083 | 6  | 2 | 4 | 63894.44 | 165346.4 | 185648.6 |
| 553.2269 | 23.52967 | 23.4585  | 23.53733 | 7  | 3 | 4 | 138542.9 | 527630   | 607370.7 |
| 553.2268 | 24.1465  | 24.09433 | 24.17983 | 9  | 4 | 5 | 186497.1 | 1000764  | 1123081  |
| 322.2384 | 19.4025  | 19.38317 | 19.46583 | 10 | 5 | 5 | 115698.9 | 411435.2 | 395935.3 |
| 430.2288 | 19.57992 | 19.55283 | 19.65933 | 10 | 5 | 5 | 335684.8 | 1310084  | 1241026  |
| 179.0172 | 6.800333 | 6.778533 | 6.933267 | 4  | 3 | 1 | 12985670 | 1.15E+08 | 1.4E+08  |
| 401.9943 | 18.1585  | 17.998   | 18.1995  | 7  | 3 | 3 | 173907.5 | 609117.3 | 588641.4 |
| 526.1505 | 26.90408 | 26.85967 | 26.94067 | 10 | 5 | 5 | 2193454  | 10822363 | 12443171 |
| 349.3299 | 24.06875 | 24.00183 | 24.07917 | 6  | 2 | 4 | 101578.9 | 354739.4 | 483557.4 |
| 431.0798 | 16.957   | 16.893   | 16.97683 | 5  | 1 | 4 | 41084.28 | 108509.9 | 162172.8 |
| 706.2347 | 32.1315  | 32.08683 | 32.20817 | 5  | 2 | 3 | 120103.4 | 389357.2 | 345661.1 |
| 280.249  | 21.799   | 21.66133 | 21.83617 | 7  | 3 | 4 | 74642.79 | 240675.5 | 206804   |
| 257.0675 | 19.35425 | 19.32383 | 19.37867 | 10 | 5 | 5 | 271728.6 | 1276488  | 1258848  |
| 387.093  | 16.6775  | 16.64683 | 16.6995  | 5  | 2 | 3 | 301370.6 | 679182.4 | 994767.2 |
| 215.1837 | 23.29608 | 23.25383 | 23.353   | 10 | 5 | 5 | 436781.3 | 1882791  | 2005681  |
| 254.1835 | 23.04808 | 22.98833 | 23.06417 | 6  | 3 | 3 | 57202.85 | 175218.5 | 177662.9 |
| 597.8179 | 30.27992 | 30.24433 | 30.34733 | 6  | 2 | 4 | 130781   | 356107.2 | 483871   |
| 645.4324 | 10.04113 | 10.02042 | 10.05612 | 4  | 1 | 3 | 239476.8 | 314748   | 482582.7 |
| 290.5908 | 8.923    | 8.747883 | 8.96155  | 5  | 3 | 2 | 183933.1 | 297507.5 | 242264.5 |
| 296.1972 | 28.483   | 28.40317 | 28.51283 | 7  | 3 | 4 | 105260.7 | 489596.4 | 540252.2 |
| 267.28   | 25.68383 | 25.66133 | 25.70383 | 7  | 3 | 4 | 139786.8 | 528183.6 | 635183.7 |
| 467.3672 | 29.52017 | 29.448   | 29.57683 | 7  | 3 | 4 | 49838.95 | 183117.7 | 233397.9 |
| 791.4356 | 9.551242 | 9.529583 | 9.584433 | 4  | 3 | 1 | 1530513  | 1478081  | 1434611  |
| 524.8025 | 30.98067 | 30.93483 | 31.07383 | 6  | 3 | 3 | 139860.2 | 329234.4 | 316318.6 |
| 228.2041 | 32.24267 | 32.20817 | 32.2625  | 6  | 2 | 4 | 126049.3 | 708329.8 | 637071.3 |
| 331.2487 | 16.72167 | 16.67383 | 16.76283 | 7  | 3 | 4 | 61243.37 | 236802.9 | 193160.1 |
| 324.6207 | 8.7798   | 8.551733 | 8.8441   | 3  | 3 | 0 | 197704.3 | 169107.1 | 141514   |
| 357.9896 | 19.34175 | 19.31383 | 19.364   | 6  | 2 | 4 | 139429.1 | 393874   | 518166.7 |
| 604.1665 | 21.1795  | 21.14133 | 21.264   | 6  | 2 | 4 | 71309.13 | 203050.4 | 282063   |
| 551.172  | 22.13133 | 22.05267 | 22.1365  | 6  | 2 | 4 | 394449.4 | 819561.7 | 1274682  |
| 973.6528 | 29.6515  | 29.59383 | 29.68933 | 5  | 3 | 2 | 28671.09 | 122348.6 | 47379.02 |
| 228.2323 | 34.18108 | 34.1575  | 34.2425  | 8  | 4 | 4 | 117704.2 | 570741.2 | 565750.1 |
| 787.2619 | 20.64217 | 20.628   | 20.7265  | 5  | 2 | 3 | 492369.1 | 1478795  | 2063268  |
| 583.1725 | 19.7095  | 19.69567 | 19.765   | 7  | 3 | 4 | 58368.93 | 202821.5 | 228037.6 |
| 168.1021 | 31.30117 | 31.19267 | 31.38067 | 7  | 3 | 4 | 113392.1 | 362146.9 | 344939   |
| 414.692  | 32.11583 | 32.10233 | 32.14683 | 4  | 1 | 3 | 67364.81 | 108486.3 | 239779.4 |
| 498.3653 | 7.076433 | 6.9957   | 7.125333 | 5  | 2 | 3 | 297443.1 | 483840.9 | 878685.2 |
| 343.1545 | 28.83383 | 28.67283 | 28.971   | 11 | 5 | 5 | 1776635  | 13380195 | 23059957 |
| 616.428  | 18.36533 | 18.35983 | 18.426   | 3  | 0 | 3 | 37300.55 | 180379.9 | 157916.7 |



|          |          |          |          |    |   |   |          |          |          |
|----------|----------|----------|----------|----|---|---|----------|----------|----------|
| 552.2234 | 24.13517 | 24.0865  | 24.18033 | 9  | 5 | 4 | 685202.4 | 3714184  | 4183291  |
| 286.2381 | 32.549   | 32.4915  | 32.5835  | 5  | 1 | 4 | 80374.79 | 326265.8 | 320002   |
| 364.3144 | 39.57583 | 39.5005  | 39.68383 | 7  | 4 | 3 | 357972.1 | 1958574  | 2060417  |
| 511.1783 | 30.75492 | 30.474   | 30.82067 | 4  | 1 | 3 | 95487.27 | 164120.2 | 320062.7 |
| 220.1664 | 28.16133 | 28.05933 | 28.1765  | 7  | 3 | 4 | 27994.16 | 139237.5 | 136495.2 |
| 462.2839 | 22.90067 | 22.84617 | 22.93817 | 7  | 3 | 4 | 82924.54 | 254068   | 193658.6 |
| 484.3947 | 20.49792 | 20.45233 | 20.64567 | 8  | 4 | 4 | 139771.9 | 441354.1 | 494839.9 |
| 751.621  | 34.8445  | 34.80733 | 34.9815  | 10 | 5 | 5 | 1455382  | 5920054  | 3045537  |
| 675.4742 | 26.72883 | 26.69733 | 26.76667 | 7  | 3 | 4 | 66151.69 | 229084.2 | 292599.5 |
| 229.0731 | 22.14983 | 22.1015  | 22.15117 | 5  | 2 | 3 | 48231.34 | 172607.3 | 83145.31 |
| 1168.542 | 33.17183 | 33.1275  | 33.2075  | 5  | 2 | 3 | 71157.07 | 187019.5 | 255222   |
| 469.3125 | 26.21758 | 26.15833 | 26.30383 | 10 | 5 | 5 | 1591844  | 7366562  | 6760590  |
| 321.2063 | 37.99158 | 37.97833 | 38.00883 | 4  | 1 | 3 | 42447.27 | 276253.1 | 178570.5 |
| 406.1292 | 22.4995  | 22.45467 | 22.542   | 10 | 5 | 5 | 3962357  | 20135234 | 20817761 |
| 605.241  | 9.206417 | 9.132617 | 9.2529   | 5  | 3 | 2 | 1014561  | 2743052  | 4457062  |
| 263.2221 | 21.7825  | 21.69167 | 21.83617 | 8  | 4 | 4 | 146654.4 | 560076.4 | 611174.5 |
| 461.3745 | 26.59933 | 26.52633 | 26.63983 | 9  | 4 | 5 | 521808.4 | 2184194  | 2289889  |
| 272.095  | 22.119   | 22.03667 | 22.15067 | 8  | 3 | 5 | 525666   | 1901761  | 2610966  |
| 651.4469 | 20.65667 | 20.61367 | 20.7355  | 5  | 2 | 3 | 395011.1 | 1346862  | 1651545  |
| 391.952  | 12.51222 | 12.46632 | 12.52932 | 4  | 1 | 3 | 414228.2 | 908971.2 | 1913192  |
| 397.2592 | 21.67117 | 21.60133 | 21.72217 | 9  | 4 | 5 | 95846.3  | 179070.4 | 195718.3 |
| 583.2225 | 18.128   | 18.07617 | 18.1585  | 8  | 3 | 5 | 1033731  | 2503586  | 4367498  |
| 452.1076 | 9.236417 | 9.101033 | 9.266617 | 7  | 4 | 3 | 1663476  | 4100470  | 2462610  |
| 616.4551 | 10.34642 | 10.3327  | 10.3654  | 4  | 1 | 3 | 377851.2 | 409869.3 | 504509.9 |
| 392.1609 | 25.75517 | 25.733   | 25.77333 | 5  | 0 | 5 | 150597.5 | 810137.5 | 210194.3 |
| 592.0534 | 22.1215  | 22.1075  | 22.15117 | 3  | 0 | 3 | 52815.23 | 89962.8  | 117566.4 |
| 299.1185 | 15.89388 | 15.85123 | 15.9636  | 8  | 4 | 4 | 199581   | 778888.2 | 1036554  |
| 681.4338 | 21.737   | 21.686   | 21.8075  | 7  | 4 | 3 | 42461.48 | 116825.4 | 125065.8 |
| 444.3092 | 29.637   | 29.57833 | 29.69667 | 9  | 5 | 4 | 213650.5 | 1011768  | 814999.8 |
| 464.1327 | 10.68362 | 10.59208 | 10.78962 | 3  | 0 | 3 | 2453186  | 5833925  | 10003277 |
| 207.1237 | 9.5169   | 9.488017 | 9.537367 | 5  | 2 | 3 | 2416773  | 4445183  | 6846991  |
| 325.2783 | 18.31233 | 18.292   | 18.33067 | 3  | 0 | 3 | 42331.47 | 117016.2 | 172173.5 |
| 438.1978 | 21.47717 | 21.38433 | 21.50817 | 5  | 2 | 3 | 77298.4  | 237886.7 | 157202.4 |
| 272.1612 | 32.46817 | 32.39533 | 32.52517 | 5  | 2 | 3 | 23771.22 | 89481.05 | 75585.52 |
| 227.0734 | 25.66967 | 25.64333 | 25.689   | 6  | 2 | 4 | 129420.7 | 484475.4 | 396472.7 |
| 528.3756 | 25.24183 | 25.1465  | 25.30433 | 5  | 2 | 3 | 119778.5 | 323180.7 | 515249.4 |
| 477.0313 | 22.99133 | 22.88367 | 23.01033 | 7  | 3 | 4 | 175200.5 | 606285.9 | 792537.9 |
| 283.009  | 12.6259  | 12.51447 | 12.85362 | 7  | 1 | 5 | 445171.3 | 2022971  | 3691736  |
| 554.0773 | 26.63733 | 26.63517 | 26.65383 | 4  | 1 | 3 | 32781.55 | 65447.07 | 91019.67 |
| 213.1853 | 18.91675 | 18.8495  | 18.98233 | 8  | 4 | 4 | 187586   | 1820760  | 1644290  |
| 623.2252 | 31.02317 | 30.95017 | 31.07383 | 5  | 1 | 4 | 255268.5 | 649333.8 | 859614.3 |
| 417.2185 | 23.16917 | 23.10367 | 23.21    | 10 | 5 | 5 | 388059.9 | 1540795  | 1326278  |
| 224.2131 | 10.83302 | 10.77882 | 10.97298 | 7  | 2 | 5 | 263861.1 | 718810.6 | 974954.8 |
| 335.1819 | 21.48092 | 21.4455  | 21.52033 | 6  | 3 | 3 | 108122.7 | 482819.1 | 461870.3 |
| 315.2535 | 39.59017 | 39.5005  | 39.62267 | 9  | 5 | 4 | 874805.3 | 3976185  | 4822869  |
| 582.2192 | 18.12092 | 18.06983 | 18.14367 | 8  | 3 | 5 | 4036978  | 10276316 | 17545247 |
| 542.2895 | 18.77042 | 18.74483 | 18.80483 | 4  | 1 | 3 | 43668.89 | 72959.03 | 50234.29 |

|          |          |          |          |    |   |   |          |          |          |
|----------|----------|----------|----------|----|---|---|----------|----------|----------|
| 305.2885 | 23.6495  | 23.5775  | 23.69233 | 10 | 5 | 5 | 1526990  | 6071240  | 6647994  |
| 353.3418 | 43.64483 | 43.53283 | 43.68883 | 7  | 3 | 4 | 101517.4 | 1638785  | 767714.2 |
| 510.1452 | 22.12717 | 22.05267 | 22.14983 | 7  | 2 | 5 | 950414.5 | 2587745  | 4202988  |
| 230.8898 | 2.065733 | 2.0466   | 2.218533 | 7  | 4 | 3 | 148425.3 | 962137.3 | 763057.7 |
| 341.8316 | 9.51595  | 9.49235  | 9.537367 | 4  | 1 | 3 | 6336970  | 10793026 | 14533528 |
| 391.1415 | 19.6915  | 19.67333 | 20.01633 | 11 | 4 | 5 | 1277008  | 3629767  | 6611899  |
| 304.2851 | 23.6495  | 23.57567 | 23.69233 | 10 | 5 | 5 | 8366869  | 37867098 | 40583237 |
| 415.212  | 22.74667 | 22.71733 | 22.77767 | 9  | 4 | 5 | 2111672  | 13005093 | 11374569 |
| 259.1655 | 27.17558 | 27.11533 | 27.24383 | 8  | 3 | 5 | 51131.91 | 206681.6 | 144973.5 |
| 644.2632 | 32.09358 | 32.05683 | 32.2235  | 8  | 4 | 4 | 217700.3 | 1000460  | 916384.7 |
| 273.243  | 28.77533 | 28.69767 | 28.809   | 7  | 3 | 4 | 112262.9 | 527329.6 | 514665.2 |
| 281.2955 | 30.37742 | 30.33717 | 30.42017 | 10 | 5 | 5 | 58252.41 | 235430.6 | 110725   |
| 348.2151 | 14.80297 | 14.77097 | 14.8097  | 5  | 2 | 3 | 79917.57 | 303427.7 | 266713.2 |
| 724.3408 | 21.69042 | 21.57183 | 21.72567 | 10 | 5 | 5 | 225489.7 | 617107.2 | 594068.8 |
| 294.2643 | 25.21217 | 25.1645  | 25.23667 | 7  | 3 | 4 | 132632.5 | 378774.3 | 531635.4 |
| 542.325  | 26.22667 | 26.202   | 26.28967 | 7  | 4 | 3 | 911603.4 | 4011445  | 3755970  |
| 331.157  | 34.7115  | 34.693   | 34.74833 | 4  | 1 | 3 | 48122.17 | 180395.4 | 169429.4 |
| 469.1999 | 26.98317 | 26.95617 | 27.01333 | 6  | 2 | 4 | 56083.12 | 170611.7 | 189621.5 |
| 309.0982 | 19.55075 | 19.515   | 19.58533 | 6  | 2 | 4 | 92440.17 | 339081.7 | 404399   |
| 292.1809 | 14.0205  | 13.90268 | 14.19735 | 5  | 3 | 2 | 93424.64 | 578032.8 | 507288.2 |
| 259.1543 | 31.06642 | 31.00267 | 31.11333 | 6  | 2 | 4 | 100988.6 | 563124.9 | 447972.8 |
| 610.4038 | 11.02976 | 10.9416  | 11.1665  | 8  | 3 | 5 | 896474.3 | 2899700  | 3797642  |
| 384.3589 | 24.48092 | 24.3855  | 24.52033 | 8  | 4 | 4 | 161001   | 598602.7 | 682711   |
| 296.2138 | 28.14617 | 28.05933 | 28.18433 | 10 | 5 | 5 | 260336.1 | 1122652  | 1298641  |
| 153.0482 | 19.36408 | 19.32383 | 19.38733 | 8  | 3 | 5 | 260064.4 | 1087747  | 661071.8 |
| 370.0269 | 15.89363 | 15.83673 | 15.92467 | 6  | 2 | 4 | 42436.63 | 171290.2 | 201475.8 |
| 352.2552 | 9.513583 | 9.463983 | 9.862433 | 8  | 4 | 3 | 13521884 | 31860343 | 62385790 |
| 553.1674 | 22.12125 | 22.05267 | 22.14983 | 8  | 3 | 5 | 2916716  | 8427273  | 13479779 |
| 343.3325 | 22.3925  | 22.34333 | 22.42133 | 10 | 5 | 5 | 1414271  | 5680274  | 6070564  |
| 210.1689 | 9.180183 | 9.101033 | 9.21955  | 4  | 3 | 1 | 925621.7 | 1497460  | 1062653  |
| 339.2896 | 33.68517 | 33.64    | 33.71317 | 7  | 4 | 3 | 268694.3 | 1922209  | 1254038  |
| 598.2664 | 30.068   | 29.9815  | 30.175   | 3  | 0 | 3 | 65567.87 | 110077.4 | 63086.79 |
| 665.391  | 10.85043 | 10.81753 | 10.90772 | 7  | 4 | 3 | 892643.5 | 1289407  | 2059211  |
| 227.2009 | 21.58017 | 21.44083 | 21.61833 | 10 | 5 | 5 | 2425838  | 18811882 | 18779851 |
| 672.2818 | 30.26367 | 30.22083 | 30.36167 | 6  | 3 | 3 | 45363.42 | 184954.2 | 186320.3 |
| 459.2664 | 44.24783 | 44.23017 | 44.2775  | 7  | 3 | 4 | 30329.34 | 202423.9 | 29348.45 |
| 287.0482 | 12.66875 | 12.48613 | 12.84028 | 9  | 3 | 5 | 545943.6 | 2905878  | 5645297  |
| 212.2375 | 27.948   | 27.867   | 28.04117 | 10 | 5 | 5 | 492768.2 | 2235924  | 2216043  |
| 488.2696 | 42.31133 | 42.29017 | 42.427   | 3  | 3 | 0 | 43062.67 | 386540.1 | 212307.7 |
| 488.2698 | 43.64175 | 43.51083 | 43.75667 | 4  | 3 | 0 | 61569.02 | 685104.1 | 212615.7 |
| 207.9887 | 17.72183 | 17.64833 | 17.76767 | 8  | 3 | 5 | 92010.23 | 545393.2 | 549421.4 |
| 453.3439 | 16.26628 | 16.21953 | 16.31143 | 3  | 0 | 3 | 9029104  | 20364428 | 10549425 |
| 637.4084 | 9.987683 | 9.791017 | 10.09217 | 4  | 0 | 3 | 785296.5 | 751872.6 | 1039530  |
| 230.1543 | 19.12883 | 19.09267 | 19.17367 | 9  | 4 | 5 | 105620.5 | 386432.2 | 362939.8 |
| 325.2395 | 22.8305  | 22.81183 | 22.84267 | 5  | 1 | 4 | 43341.28 | 180823.8 | 106564.9 |
| 206.0895 | 30.41167 | 30.31867 | 30.45617 | 4  | 1 | 3 | 278584.4 | 949238.4 | 1023543  |
| 594.2501 | 27.463   | 27.43983 | 27.7505  | 9  | 3 | 5 | 329236.1 | 1679093  | 2173414  |

|          |          |          |          |    |   |   |          |          |          |
|----------|----------|----------|----------|----|---|---|----------|----------|----------|
| 1240.562 | 31.45683 | 31.301   | 31.47367 | 4  | 3 | 1 | 68367.23 | 184974.4 | 228029.7 |
| 385.1677 | 19.97642 | 19.96317 | 19.99333 | 4  | 1 | 3 | 101338.1 | 552591.7 | 506942.6 |
| 455.1645 | 26.64692 | 26.62717 | 26.69383 | 6  | 2 | 4 | 87742.57 | 302128.8 | 266980.7 |
| 527.1537 | 26.89875 | 26.85967 | 26.94067 | 10 | 5 | 5 | 660798.1 | 3071931  | 3573156  |
| 353.5931 | 29.257   | 29.228   | 29.32917 | 6  | 2 | 4 | 133759.4 | 390670.5 | 570957.5 |
| 583.4689 | 34.16183 | 34.12717 | 34.1995  | 5  | 2 | 3 | 28084.86 | 62635.19 | 62641.63 |
| 163.9765 | 2.193642 | 2.13475  | 2.20475  | 4  | 3 | 1 | 330971.7 | 1107371  | 1071123  |
| 476.028  | 22.98383 | 22.92417 | 23.01883 | 9  | 4 | 5 | 736090.9 | 3238912  | 4278148  |
| 650.4433 | 21.00758 | 20.96383 | 21.04883 | 8  | 3 | 5 | 1271843  | 2939767  | 3577280  |
| 312.0384 | 23.48142 | 23.42917 | 23.56833 | 8  | 4 | 4 | 80399.51 | 476764.2 | 527915.6 |
| 503.3066 | 9.1226   | 8.9037   | 9.186383 | 8  | 5 | 2 | 781826.3 | 1203152  | 491871.5 |
| 326.9955 | 23.25283 | 23.14433 | 23.2975  | 5  | 1 | 4 | 81368.31 | 280840.2 | 189098.8 |
| 298.202  | 22.24567 | 22.1165  | 22.26017 | 9  | 4 | 5 | 165591.3 | 710512.5 | 789979.6 |
| 416.9936 | 16.997   | 16.965   | 17.06117 | 4  | 1 | 3 | 42753.26 | 115747.5 | 228224.9 |
| 438.1925 | 33.29142 | 33.25783 | 33.32083 | 6  | 2 | 4 | 145447   | 741286   | 541201.3 |
| 570.2337 | 26.23142 | 26.18667 | 26.31783 | 6  | 3 | 3 | 56347.3  | 175612.7 | 192763.5 |
| 410.2358 | 9.401867 | 9.188017 | 9.446567 | 5  | 2 | 3 | 12570519 | 27982340 | 46307391 |
| 260.1689 | 22.75367 | 22.70783 | 22.78383 | 10 | 5 | 5 | 713492.3 | 3036814  | 3591512  |
| 359.3274 | 22.37025 | 22.327   | 22.406   | 10 | 5 | 5 | 316269.3 | 1334359  | 1255985  |
| 785.2331 | 18.09008 | 18.08867 | 18.14    | 4  | 1 | 3 | 90236.22 | 138482.9 | 268943.2 |
| 328.3005 | 26.60617 | 26.54567 | 26.65017 | 7  | 3 | 4 | 325079.6 | 1652722  | 1954915  |
| 469.1187 | 22.136   | 22.11583 | 22.15067 | 4  | 1 | 3 | 171634.9 | 320055.2 | 492799.5 |
| 228.1961 | 27.29892 | 27.23733 | 27.3625  | 10 | 5 | 5 | 458781.6 | 1864824  | 2137681  |
| 277.0889 | 27.85142 | 27.82083 | 27.86817 | 6  | 2 | 4 | 70198.47 | 203180.6 | 280741.8 |
| 725.3444 | 21.67867 | 21.557   | 21.72417 | 5  | 3 | 2 | 54210.82 | 110230.8 | 107536.3 |
| 499.1399 | 16.48417 | 16.42942 | 16.48593 | 5  | 2 | 3 | 54317.63 | 130107.2 | 223650.3 |
| 670.2669 | 29.14717 | 29.09717 | 29.2115  | 6  | 2 | 4 | 82879.99 | 285061.9 | 293059.8 |
| 650.4204 | 10.85778 | 10.81753 | 10.95503 | 8  | 4 | 4 | 27812008 | 39388605 | 61950718 |
| 343.1575 | 18.1035  | 18.07617 | 18.16983 | 5  | 2 | 3 | 149926.7 | 501820.5 | 653005.5 |
| 552.363  | 10.93684 | 10.92227 | 10.9696  | 6  | 2 | 4 | 248794.8 | 517997.7 | 631679.3 |
| 535.0721 | 21.01333 | 20.91917 | 21.314   | 6  | 2 | 3 | 405051.1 | 2784060  | 4443067  |
| 276.1603 | 10.86479 | 10.76538 | 10.9696  | 6  | 1 | 4 | 184255.4 | 352062.3 | 399944.6 |
| 262.0751 | 18.10333 | 18.0745  | 18.16983 | 5  | 2 | 3 | 96384.73 | 283833.7 | 344824.8 |
| 515.3583 | 29.985   | 29.93583 | 30.00317 | 10 | 5 | 5 | 204510   | 2113706  | 428627.8 |
| 463.186  | 10.40814 | 10.34782 | 10.45082 | 4  | 3 | 1 | 224425.3 | 453485.9 | 374948.2 |
| 412.3275 | 22.72367 | 22.694   | 22.7545  | 6  | 2 | 4 | 64028.28 | 219879.4 | 197842.7 |
| 386.2034 | 10.66787 | 10.58428 | 10.72183 | 7  | 4 | 3 | 1793465  | 4958054  | 6600963  |
| 232.0717 | 22.13292 | 22.02083 | 22.15117 | 6  | 2 | 4 | 97943.3  | 238901.9 | 327028.9 |
| 340.7869 | 31.53583 | 31.47383 | 31.58767 | 7  | 4 | 3 | 113244.4 | 235249   | 300841   |
| 500.2792 | 26.13683 | 26.08517 | 26.42867 | 11 | 5 | 5 | 1971998  | 5904746  | 6360742  |
| 399.2138 | 43.60183 | 43.578   | 43.63067 | 7  | 3 | 4 | 118490.5 | 852730.7 | 617292.3 |
| 554.1705 | 22.12717 | 22.05267 | 22.14983 | 7  | 2 | 5 | 695372.1 | 1744802  | 2764042  |
| 528.4019 | 32.26117 | 32.19283 | 32.2625  | 5  | 2 | 3 | 53241.67 | 160507.6 | 155107.9 |
| 619.2498 | 30.979   | 30.9495  | 31.0515  | 5  | 4 | 1 | 67930.29 | 213518.2 | 175158.6 |
| 596.1969 | 10.62147 | 10.56337 | 10.67897 | 5  | 3 | 2 | 363652.3 | 411403.5 | 688807.7 |
| 308.13   | 25.66967 | 25.63817 | 25.697   | 7  | 3 | 4 | 66413.57 | 148454.4 | 213006.3 |
| 241.1799 | 32.4975  | 32.37967 | 32.54    | 5  | 2 | 3 | 78019.22 | 545871.1 | 314412.1 |

|          |          |          |          |    |   |   |          |          |          |
|----------|----------|----------|----------|----|---|---|----------|----------|----------|
| 322.2383 | 28.14633 | 28.04433 | 28.1615  | 10 | 5 | 5 | 513762   | 2331271  | 2530217  |
| 580.2239 | 18.12358 | 18.07617 | 18.1585  | 6  | 3 | 3 | 376282.1 | 954135.5 | 1660240  |
| 497.0392 | 16.68083 | 16.66133 | 16.72017 | 4  | 1 | 3 | 61861.68 | 132135.5 | 245310.9 |
| 171.1381 | 17.02158 | 16.97933 | 17.05383 | 6  | 3 | 3 | 121108.3 | 1160996  | 304491.1 |
| 407.1325 | 22.49183 | 22.4575  | 22.542   | 10 | 5 | 5 | 1009984  | 4453910  | 4753663  |
| 439.1897 | 33.28867 | 33.243   | 33.32083 | 7  | 3 | 4 | 103982.6 | 479375.7 | 502103   |
| 584.2193 | 18.11817 | 18.0555  | 18.1435  | 7  | 3 | 4 | 169721.6 | 327569.3 | 510102.4 |
| 1177.538 | 10.67151 | 10.6177  | 10.68362 | 6  | 2 | 4 | 1030448  | 2095998  | 3525596  |
| 623.2462 | 18.11767 | 18.06983 | 18.1585  | 7  | 3 | 4 | 389275.8 | 990449.1 | 1708294  |
| 539.436  | 25.39133 | 25.3475  | 25.41833 | 5  | 3 | 2 | 48141.95 | 123223.4 | 165556.4 |
| 691.508  | 10.34782 | 10.20952 | 10.40528 | 5  | 2 | 3 | 377270.4 | 579924.2 | 705852.3 |
| 847.1066 | 22.14317 | 22.11583 | 22.15067 | 4  | 1 | 3 | 87855.52 | 177867.3 | 320041.3 |
| 549.2474 | 27.48183 | 27.44817 | 27.53083 | 6  | 2 | 4 | 361100.7 | 1925195  | 2567230  |
| 551.1489 | 10.69548 | 10.64867 | 10.73325 | 6  | 3 | 3 | 453489.5 | 1138735  | 1347517  |
| 499.3579 | 10.95788 | 10.92607 | 10.98405 | 6  | 4 | 2 | 80715.23 | 164795   | 208451.5 |
| 315.9837 | 16.95233 | 16.86417 | 16.96683 | 7  | 3 | 4 | 81217.39 | 398758.3 | 530075.6 |
| 350.1056 | 16.69    | 16.63858 | 16.73067 | 10 | 5 | 5 | 1480032  | 6730711  | 9740860  |
| 305.8315 | 23.664   | 23.635   | 23.707   | 5  | 2 | 3 | 27083.95 | 78063.03 | 102036.6 |
| 315.3283 | 23.49492 | 23.42917 | 23.58517 | 10 | 5 | 5 | 887249.1 | 5079195  | 5499487  |
| 471.1137 | 22.1355  | 22.05267 | 22.142   | 7  | 2 | 5 | 1502784  | 3911022  | 6458840  |
| 1155.529 | 30.14333 | 30.0885  | 30.16417 | 5  | 2 | 3 | 49994.2  | 172317.9 | 192941.9 |
| 637.2713 | 26.99917 | 26.98417 | 27.045   | 5  | 2 | 3 | 42962.19 | 117375   | 140314.9 |
| 534.2875 | 7.464333 | 7.40945  | 7.47935  | 5  | 2 | 3 | 1760168  | 3384909  | 6773809  |
| 620.2928 | 24.70783 | 24.666   | 24.73533 | 7  | 2 | 5 | 71981.6  | 294124.2 | 294393.5 |
| 513.1436 | 22.12717 | 22.05267 | 22.14983 | 7  | 2 | 5 | 2100820  | 5417358  | 8865994  |
| 590.9558 | 22.996   | 22.94483 | 23.02967 | 5  | 2 | 3 | 43233.95 | 98604.17 | 128939.1 |
| 347.1182 | 31.627   | 31.528   | 31.69017 | 9  | 4 | 5 | 365477.9 | 1440086  | 1574615  |
| 274.2574 | 32.4975  | 32.39533 | 32.54    | 5  | 2 | 3 | 21965.41 | 74026.9  | 100912.2 |
| 455.5923 | 9.193308 | 9.101033 | 9.280533 | 8  | 5 | 3 | 7472490  | 17088099 | 12294055 |
| 610.2601 | 29.20158 | 29.16967 | 29.25583 | 6  | 2 | 4 | 533226.6 | 1272655  | 1519368  |
| 552.2235 | 23.52967 | 23.4585  | 23.53733 | 9  | 4 | 5 | 458079.8 | 1894907  | 2128852  |
| 288.0854 | 21.71608 | 21.68367 | 21.755   | 4  | 1 | 3 | 37194.67 | 102083.7 | 88277.64 |
| 563.1235 | 23.88208 | 23.8115  | 23.88617 | 4  | 1 | 3 | 51299.16 | 84580.56 | 180548.2 |
| 464.2282 | 23.32317 | 23.25133 | 23.34067 | 7  | 3 | 4 | 102160.3 | 454002.3 | 351498.4 |
| 522.356  | 31.25    | 31.22767 | 31.3435  | 8  | 4 | 4 | 5643691  | 52175092 | 41249538 |
| 316.1786 | 34.65867 | 34.5525  | 34.67233 | 6  | 2 | 4 | 85120.55 | 310693.1 | 181291   |
| 341.3168 | 24.41933 | 24.3855  | 24.44517 | 8  | 4 | 4 | 431939.6 | 5858590  | 4776771  |
| 379.0732 | 30.8035  | 30.7775  | 30.8355  | 3  | 0 | 3 | 9321994  | 20701706 | 40104902 |
| 239.1622 | 21.13525 | 21.05833 | 21.16267 | 8  | 4 | 4 | 309017.5 | 1592787  | 1270261  |
| 647.9441 | 43.30767 | 43.29333 | 43.3375  | 6  | 4 | 2 | 45054.05 | 265904.6 | 141567   |
| 272.0958 | 25.68383 | 25.64683 | 25.70383 | 7  | 3 | 4 | 84174.63 | 210996.1 | 264810.5 |
| 396.2235 | 43.60142 | 43.5415  | 43.63283 | 10 | 5 | 5 | 731985.4 | 8809031  | 5826031  |
| 205.0862 | 30.442   | 30.31867 | 30.48133 | 7  | 3 | 4 | 1942943  | 10631441 | 11103997 |
| 577.9215 | 10.11443 | 10.02378 | 10.1429  | 7  | 5 | 2 | 1347097  | 1420073  | 2201003  |
| 335.1258 | 30.44583 | 30.33317 | 30.4965  | 10 | 5 | 5 | 802100.7 | 4093426  | 2955149  |
| 548.8097 | 30.93633 | 30.8905  | 31.00267 | 6  | 2 | 4 | 269292.9 | 566334.1 | 830266.3 |
| 379.2525 | 31.06583 | 31.00267 | 31.1185  | 7  | 3 | 4 | 75507.09 | 335907.6 | 280922.6 |

|          |          |          |          |    |   |   |          |          |          |
|----------|----------|----------|----------|----|---|---|----------|----------|----------|
| 494.3247 | 27.76292 | 27.724   | 27.84883 | 6  | 2 | 4 | 8949613  | 52479658 | 45392849 |
| 219.1383 | 28.1615  | 28.04433 | 28.176   | 5  | 2 | 3 | 80221.98 | 463104.8 | 389981.6 |
| 292.285  | 34.70708 | 34.67217 | 34.73417 | 10 | 5 | 5 | 1576847  | 8253272  | 8894970  |
| 650.4435 | 20.62817 | 20.58967 | 20.7355  | 9  | 5 | 4 | 1097096  | 3325804  | 4083546  |
| 401.3654 | 27.30492 | 27.26517 | 27.34783 | 6  | 3 | 3 | 58412.5  | 189052.8 | 222933.1 |
| 354.1942 | 43.59433 | 43.55683 | 43.63283 | 10 | 5 | 5 | 397455.8 | 2796183  | 2655137  |
| 572.3872 | 28.13217 | 28.02967 | 28.176   | 5  | 2 | 3 | 90931.65 | 223994   | 291820.3 |
| 419.321  | 40.32533 | 40.25067 | 40.37867 | 7  | 3 | 4 | 123004.3 | 931114   | 533925.3 |
| 516.3537 | 33.6035  | 33.59683 | 33.66833 | 6  | 2 | 4 | 133223.3 | 1417493  | 908740.4 |
| 151.0276 | 30.7775  | 30.73283 | 30.861   | 5  | 1 | 4 | 53817.12 | 215738.3 | 160973.3 |
| 223.0638 | 42.74217 | 42.67917 | 42.77867 | 10 | 5 | 5 | 136228.6 | 992921.4 | 475730.1 |
| 416.0476 | 19.3495  | 19.29933 | 19.37867 | 5  | 2 | 3 | 81940.2  | 324518.5 | 407865.3 |
| 689.2822 | 37.33    | 37.31467 | 37.45817 | 6  | 3 | 3 | 176026.3 | 948529.7 | 863200.7 |
| 299.1108 | 11.17531 | 11.15293 | 11.19352 | 4  | 1 | 3 | 191696.3 | 693540.2 | 969803.6 |
| 494.3101 | 17.57517 | 17.5605  | 17.619   | 5  | 2 | 3 | 70337.61 | 328834.2 | 176816.7 |
| 597.3158 | 30.28983 | 30.24533 | 30.36167 | 6  | 2 | 4 | 257711.4 | 600137.5 | 761913.2 |
| 398.9951 | 11.0508  | 10.83542 | 11.13185 | 5  | 1 | 4 | 366821.7 | 1182346  | 2033238  |
| 449.3746 | 24.49067 | 24.45017 | 24.52033 | 5  | 1 | 4 | 59626.6  | 183646.5 | 220855.9 |
| 589.4253 | 11.0317  | 10.94645 | 11.05148 | 6  | 2 | 4 | 287971.4 | 845636   | 964077.2 |
| 543.3128 | 7.464333 | 7.40945  | 7.47935  | 5  | 2 | 3 | 1589956  | 3254040  | 6548241  |
| 477.3117 | 25.02667 | 24.9965  | 25.04833 | 10 | 5 | 5 | 738527   | 2692912  | 3197788  |
| 527.8905 | 44.03058 | 43.9915  | 44.08933 | 8  | 3 | 5 | 124091.5 | 1140883  | 271293.3 |
| 707.5945 | 35.2655  | 35.23467 | 35.35667 | 7  | 4 | 3 | 53410.44 | 152721.8 | 91114.46 |
| 373.0983 | 42.74317 | 42.67917 | 42.7635  | 10 | 5 | 5 | 117861.6 | 706518.7 | 349329.5 |
| 801.555  | 23.23833 | 23.2015  | 23.25283 | 5  | 2 | 3 | 191013.7 | 246713.9 | 342843.7 |
| 403.0844 | 12.82933 | 12.78633 | 12.94688 | 5  | 1 | 4 | 123695.6 | 280443.7 | 586157.5 |
| 527.112  | 16.6535  | 16.63233 | 16.67783 | 5  | 2 | 3 | 130512.3 | 296093.6 | 571426.9 |
| 563.9241 | 22.996   | 22.97417 | 23.01433 | 5  | 2 | 3 | 93552.36 | 232590.7 | 363928.8 |
| 597.3461 | 35.54267 | 35.52967 | 35.56183 | 5  | 3 | 2 | 86548.23 | 458761.9 | 358461.4 |
| 454.4259 | 37.446   | 37.40167 | 37.63617 | 9  | 4 | 5 | 69323.38 | 383962.8 | 149126.9 |
| 740.1983 | 25.61833 | 25.6075  | 25.6595  | 5  | 2 | 3 | 57512.84 | 166080   | 196489.6 |
| 462.3781 | 26.59683 | 26.57183 | 26.65383 | 8  | 4 | 4 | 131621.8 | 512857.1 | 544240.1 |
| 522.4293 | 32.057   | 31.982   | 32.2355  | 5  | 3 | 1 | 47120180 | 70176180 | 1.31E+08 |
| 452.9022 | 9.186383 | 9.08515  | 9.208    | 5  | 3 | 2 | 1476505  | 2220606  | 1919384  |
| 456.6028 | 9.193308 | 9.101033 | 9.266617 | 8  | 5 | 3 | 1717488  | 4325966  | 2819225  |
| 200.1363 | 32.95233 | 32.86217 | 32.99867 | 7  | 4 | 3 | 103117.6 | 500044.2 | 508350.4 |
| 199.0419 | 18.10067 | 18.05983 | 18.16117 | 4  | 1 | 3 | 97225.84 | 337570.4 | 284276.4 |
| 228.1962 | 15.90278 | 15.79275 | 16.07195 | 13 | 5 | 5 | 2828417  | 34151316 | 43722817 |
| 273.2375 | 32.4115  | 32.37983 | 32.43083 | 3  | 0 | 3 | 11471062 | 16332612 | 16994595 |
| 389.9863 | 22.11458 | 22.05267 | 22.14983 | 6  | 2 | 4 | 191394.2 | 583107.5 | 864658.7 |
| 172.1697 | 23.49492 | 23.42917 | 23.6005  | 10 | 5 | 5 | 1083131  | 6373166  | 6852867  |
| 528.3097 | 29.47633 | 29.43333 | 29.57867 | 11 | 5 | 5 | 672683.5 | 2470085  | 2716743  |
| 275.2584 | 34.04517 | 34.03617 | 34.068   | 5  | 2 | 3 | 303350.9 | 2730527  | 2951234  |
| 256.2638 | 38.25567 | 37.90283 | 38.37433 | 13 | 4 | 5 | 306074   | 2046380  | 1377665  |
| 379.0843 | 30.465   | 30.34733 | 30.50117 | 5  | 2 | 3 | 10615209 | 29450359 | 58345053 |
| 380.2416 | 39.42    | 39.35517 | 39.46967 | 7  | 4 | 3 | 94287.91 | 636941.3 | 790532.2 |
| 487.1297 | 41.7025  | 41.66333 | 41.7455  | 10 | 5 | 5 | 48451.81 | 518927.8 | 101545.3 |

|          |          |          |          |    |   |   |          |          |          |
|----------|----------|----------|----------|----|---|---|----------|----------|----------|
| 265.0743 | 9.460417 | 9.275233 | 9.506667 | 6  | 1 | 3 | 1376261  | 1569694  | 3205103  |
| 276.2618 | 34.6975  | 34.679   | 34.7335  | 10 | 5 | 5 | 487532.3 | 2110179  | 2368032  |
| 609.3911 | 9.217692 | 9.116917 | 9.266617 | 6  | 4 | 2 | 1635332  | 1999728  | 1504187  |
| 340.7523 | 10.4628  | 10.351   | 10.51042 | 5  | 3 | 2 | 4847134  | 1711173  | 3081769  |
| 303.2287 | 10.30175 | 10.27938 | 10.42607 | 5  | 3 | 2 | 202892.1 | 191054.1 | 190092.7 |
| 454.1723 | 26.65383 | 26.62417 | 26.66483 | 5  | 2 | 3 | 47504.91 | 176622.9 | 165393.3 |
| 757.2383 | 18.11058 | 18.09117 | 18.155   | 4  | 1 | 3 | 262568.9 | 549888.8 | 988593.8 |
| 357.2835 | 29.78292 | 29.74967 | 29.81717 | 8  | 4 | 4 | 41752.19 | 266026.1 | 81809.92 |
| 541.1925 | 18.10342 | 18.0555  | 18.155   | 6  | 2 | 4 | 739305.9 | 1771736  | 3077601  |
| 390.178  | 10.73622 | 10.63273 | 10.75237 | 4  | 1 | 3 | 299710.6 | 568049.5 | 955050.7 |
| 374.0983 | 42.74367 | 42.70617 | 42.7635  | 5  | 2 | 3 | 18036.87 | 78745.87 | 63234.05 |

| mean2    | sd2      | HUVEC_DN | HUVEC_DN | HUVEC_DN | HUVEC_DN | HUVEC_DN | HUVEC_11 | HUVEC_11 | HUVEC_11 |
|----------|----------|----------|----------|----------|----------|----------|----------|----------|----------|
| 59049.81 | 37447.65 | 434753.7 | 415876.4 | 347038.6 | 346649.7 | 354770.3 | 58090.8  | 18839.37 | 120562.7 |
| 26705.18 | 11956.89 | 77475.02 | 61218.68 | 72541.01 | 75407.98 | 86536.68 | 35885.33 | 11654.77 | 29355.15 |
| 705135   | 155924.9 | 125619.4 | 154392.9 | 76410.07 | 16988.21 | 26235.47 | 930249   | 713520.8 | 492367.1 |
| 555272.8 | 115182.2 | 7542.017 | 0        | 0        | 125032.1 | 336356.8 | 638698.9 | 409103.3 | 644063   |
| 3808526  | 546366.5 | 1580247  | 550835.6 | 1454325  | 1229547  | 2724174  | 3865755  | 4527305  | 3936838  |
| 88711.32 | 48777.29 | 310537.6 | 255308   | 445559.1 | 456608.1 | 305904.2 | 110425.5 | 22190.16 | 88307.22 |
| 10853.98 | 13709.05 | 125235.8 | 107699.7 | 90070.43 | 51374.61 | 77693.24 | 14506.56 | 0        | 32916.13 |
| 14214251 | 3153807  | 4626595  | 4267893  | 6322539  | 5365227  | 8052533  | 12330464 | 13065849 | 10936069 |
| 163252.2 | 42838.59 | 454118.3 | 425398.7 | 393066.1 | 368953.9 | 244335.7 | 189929.1 | 114888.4 | 196584.8 |
| 11908.91 | 12731.85 | 139215.1 | 67398.33 | 163072.1 | 147091.7 | 98574.76 | 33315.39 | 0        | 5255.08  |
| 144704.9 | 41094.52 | 298663   | 330463.6 | 359555.3 | 518559   | 344466.2 | 119820.7 | 187978.3 | 86460.24 |
| 1640966  | 488396.1 | 294716.4 | 234577.9 | 365202.6 | 103434.9 | 427223.3 | 2002196  | 820319.4 | 1566656  |
| 277480.6 | 90685.89 | 4403.666 | 14265.28 | 26686.38 | 160469.1 | 65222.89 | 397039.5 | 279001.2 | 144303.9 |
| 13592245 | 3234361  | 3782694  | 5050022  | 4343605  | 3996688  | 5435773  | 12907188 | 9244141  | 13940692 |
| 6134346  | 1602745  | 1369410  | 2029095  | 2179922  | 2818203  | 3462807  | 6693582  | 7012909  | 6710096  |
| 168958.1 | 61689.83 | 0        | 17283.78 | 0        | 23281.99 | 49063.26 | 223566.8 | 101022   | 137987.1 |
| 207061.3 | 46598.41 | 108301.2 | 87884.94 | 113348.9 | 71233.8  | 96776.33 | 229945.3 | 245991.2 | 197172.5 |
| 122024.4 | 42781.57 | 5997.695 | 0        | 26984.01 | 38946.42 | 50028.93 | 57313.62 | 176909.1 | 132385.9 |
| 143405.1 | 48428.75 | 332149   | 267445   | 258330.2 | 194319.1 | 258853.7 | 113718.1 | 155860   | 75009.4  |
| 25000.61 | 28016.81 | 211279.7 | 201507.8 | 95771.26 | 88549.51 | 196599.6 | 28373.31 | 4514.636 | 72107.87 |
| 166277.1 | 35844.45 | 113037.3 | 43558.85 | 90452.14 | 76435.85 | 110482.9 | 206067.5 | 137865   | 154453.6 |
| 1648059  | 240302.9 | 956174.3 | 1073673  | 1145970  | 1269599  | 1205025  | 1619221  | 1290848  | 1636114  |
| 2574464  | 768160.6 | 3586.029 | 3187.342 | 0        | 1175885  | 1860499  | 3177016  | 1804133  | 2164722  |
| 65967.52 | 47059.18 | 480468.2 | 1772052  | 1588060  | 2006355  | 1899157  | 12068.86 | 21016.45 | 117582.2 |
| 195720.8 | 148476.9 | 579920.3 | 398053.9 | 1050682  | 807655.5 | 710040.8 | 414492.5 | 52344.17 | 79532.66 |
| 283809.9 | 235969.5 | 451864.4 | 874559.1 | 1070005  | 1134375  | 1280891  | 384093.7 | 167662.5 | 114002.2 |
| 195842.9 | 80038.13 | 0        | 0        | 4531.737 | 71222.4  | 65846.86 | 322862.2 | 128485.8 | 162997.3 |
| 367753.5 | 248538.1 | 1024825  | 1174134  | 1089534  | 748316.7 | 612683.6 | 389897.7 | 72579.98 | 231833.6 |
| 614356.3 | 224178.8 | 30511.93 | 28665.48 | 28460.7  | 216999.6 | 419692.3 | 645254.2 | 386544.3 | 543972.9 |
| 517710.2 | 141132.8 | 0        | 6247.764 | 0        | 304089.7 | 364227.1 | 651076   | 428933.8 | 319390.3 |
| 355715.4 | 270121   | 1155939  | 1681295  | 1196591  | 1204495  | 565548.5 | 206160.9 | 723007.5 | 562402.1 |
| 78321.26 | 61950.77 | 160377.8 | 149134.4 | 277324.4 | 245195.5 | 229364.8 | 82186.91 | 12672.23 | 35075.34 |
| 2040821  | 557058.7 | 279934.3 | 201121.6 | 574190   | 777360   | 1722471  | 2581293  | 1306156  | 2431878  |
| 95964.94 | 55612.22 | 441424.9 | 240710.8 | 684380.5 | 349767.6 | 463271.1 | 191991.8 | 54635.39 | 83124.93 |
| 428912.9 | 178935.6 | 31793.98 | 34777.72 | 56627.29 | 0        | 58277.75 | 464018.1 | 208237.6 | 595132.3 |
| 44676.15 | 24397.42 | 67989.36 | 106798.4 | 101405.6 | 102835.5 | 85750.09 | 23109.71 | 74074.26 | 56465.94 |
| 47620157 | 11501676 | 6008789  | 7725906  | 8965495  | 33961150 | 33878850 | 38355844 | 48559107 | 52020326 |
| 14152072 | 3276027  | 2795560  | 2361032  | 3805340  | 7778222  | 12139820 | 13301539 | 19559621 | 12221717 |
| 79593.79 | 58643.34 | 473078.7 | 238090.8 | 689678.5 | 697185.7 | 361589.2 | 158271.5 | 20547.67 | 22893.63 |
| 4245382  | 1934326  | 36372.06 | 56927.97 | 50929.04 | 110871   | 28701.92 | 4274383  | 1243912  | 3891478  |
| 102125.9 | 54493.14 | 234513.9 | 228614.8 | 201200.2 | 141346.4 | 264056.7 | 183558.3 | 43077.48 | 71470.26 |
| 495026.4 | 127508.8 | 190465.6 | 257680.3 | 93287.1  | 325650.6 | 335549.1 | 564452.6 | 572596   | 470266.5 |
| 199728.7 | 59214.52 | 393858.8 | 524618.9 | 421495.9 | 490819.9 | 236615.2 | 159602.1 | 275072.3 | 227277.9 |
| 153467   | 69313.06 | 554778.7 | 662860   | 514413.7 | 598309.3 | 194211.5 | 57090.91 | 235056.1 | 190420.2 |
| 793830.8 | 356497.9 | 68240.32 | 37846.9  | 22022.78 | 37358.16 | 127674.8 | 763875   | 1189740  | 404549.6 |
| 204435.8 | 101002.5 | 729148.5 | 809040.5 | 571581.4 | 479836.5 | 304128.1 | 204526.9 | 285520.6 | 231597.4 |

|          |          |          |          |          |          |          |          |          |          |
|----------|----------|----------|----------|----------|----------|----------|----------|----------|----------|
| 788253.6 | 280538.4 | 33565.47 | 51924.35 | 41896.37 | 311836.4 | 631178   | 889832   | 441591.5 | 684055.5 |
| 174820.5 | 76474.39 | 4631.134 | 6723.587 | 8549.313 | 24625.91 | 116365.6 | 128870.7 | 286496.7 | 204144.5 |
| 285030   | 189282.4 | 1362209  | 788371.2 | 2281795  | 1001555  | 1474896  | 576903.9 | 78442.53 | 337289.3 |
| 1273834  | 595664.2 | 0        | 4536.469 | 0        | 132789.4 | 728051.1 | 1891310  | 629017.6 | 1073765  |
| 31967.93 | 37786.05 | 272672   | 109691.4 | 320590.3 | 309677.7 | 121375.2 | 95193.12 | 0        | 6303.683 |
| 65535099 | 26484886 | 4940830  | 6841249  | 7855769  | 38965940 | 24952707 | 33929343 | 89530135 | 77420511 |
| 25357199 | 10094523 | 8142.554 | 21813.29 | 169165.8 | 6437470  | 20310041 | 37813398 | 14931986 | 21904104 |
| 271758.3 | 120419.8 | 30471.57 | 45725.38 | 64619.83 | 19016    | 11162.89 | 330808.9 | 149594.9 | 140528.3 |
| 4918174  | 1024878  | 527040.7 | 552426.9 | 679426.3 | 2590275  | 4408708  | 5762311  | 3594891  | 4428070  |
| 36117.27 | 34332.42 | 133381.1 | 139208.1 | 257590.6 | 240763.6 | 87800.57 | 55946.23 | 13414.59 | 0        |
| 5539587  | 1426064  | 2643373  | 3058181  | 2441337  | 2983933  | 2588180  | 6067723  | 4264457  | 4823247  |
| 2936036  | 851129   | 1255119  | 1375141  | 1003352  | 1315594  | 1447329  | 3938688  | 3704753  | 1956131  |
| 41616.59 | 19161.02 | 180326.7 | 118799.6 | 359292   | 329532.4 | 208019.1 | 71792.48 | 32560.89 | 20795.07 |
| 20445589 | 7911497  | 1837492  | 2461790  | 2829883  | 11678968 | 11268904 | 12224093 | 28723289 | 23225098 |
| 37584374 | 9002250  | 2508768  | 2039880  | 4459883  | 25384297 | 29946203 | 44444967 | 28087774 | 31944571 |
| 20314873 | 6803071  | 2304449  | 2735764  | 3143689  | 15157886 | 12057926 | 13846029 | 24830332 | 25092609 |
| 20298104 | 5315766  | 1132145  | 1366831  | 2560000  | 13391866 | 16206057 | 26422973 | 14699408 | 18502771 |
| 901259.6 | 844091.5 | 2467836  | 2929830  | 2580108  | 2273031  | 1798404  | 160479.2 | 1879893  | 110218.3 |
| 233412.1 | 96709.6  | 0        | 10863.76 | 7502.386 | 33673.36 | 194422   | 284711.3 | 67567.92 | 255653.9 |
| 1478893  | 618408.3 | 328998.9 | 356934.1 | 315578.8 | 169799.1 | 282852.7 | 1632049  | 464108   | 1376169  |
| 52393.4  | 31572.12 | 301365.6 | 165539.8 | 488423.4 | 188070   | 313493.9 | 104641.3 | 21978.12 | 42439.25 |
| 182663.2 | 70581.65 | 780377   | 471132.3 | 1532457  | 1564596  | 1072324  | 231894.4 | 97583.34 | 151939.8 |
| 61698776 | 22533692 | 6330331  | 6757310  | 9308278  | 42817833 | 35503121 | 38202350 | 82435229 | 67539291 |
| 491515.6 | 202042.8 | 135826.7 | 113161.5 | 106619.3 | 119103.4 | 64675.34 | 689632.7 | 181313.3 | 404348.6 |
| 3629774  | 1332447  | 416813.6 | 439996.3 | 587835.9 | 2577856  | 1965030  | 2227024  | 4602841  | 4630493  |
| 305323.9 | 265426.3 | 1336845  | 796968.4 | 2663480  | 2655227  | 1577796  | 400220.1 | 116397.1 | 131785.9 |
| 518571.3 | 130944.1 | 1681043  | 2113443  | 1775523  | 1555903  | 622965.1 | 548065   | 689129.5 | 448330.8 |
| 540260.8 | 159748.8 | 757167.8 | 838262.4 | 879180.1 | 1360521  | 1258366  | 337026.2 | 519714.8 | 549230.5 |
| 32538.65 | 12595.68 | 241426   | 128584.5 | 377063.6 | 172157.2 | 167960   | 36242.2  | 15735.05 | 27521.55 |
| 105758.9 | 49002.68 | 408491.3 | 491178.2 | 442899.8 | 273430.7 | 152620.8 | 84374.92 | 176453.7 | 58836.66 |
| 182138.1 | 144011.4 | 528522   | 237060.5 | 584413.8 | 623412.1 | 435666.8 | 241174.8 | 30541.98 | 184604.2 |
| 443252.3 | 273872.1 | 944079.8 | 2033506  | 1417065  | 2631267  | 1213103  | 433120.5 | 189314.8 | 283847.5 |
| 1238081  | 345430.4 | 329217.2 | 276585.7 | 185566.7 | 1021461  | 802293.2 | 1249111  | 1078989  | 1025305  |
| 20859.85 | 12050.1  | 196576.6 | 131761.9 | 416633.3 | 388480.1 | 187902.1 | 38686.82 | 15962.03 | 27521.72 |
| 60481067 | 26795555 | 3979246  | 5004212  | 4845372  | 29566288 | 24471036 | 27054029 | 84145632 | 81116650 |
| 783471.7 | 321925.3 | 2646.379 | 2822.129 | 73364.3  | 652167.5 | 190449.4 | 416456.6 | 1052852  | 819781.8 |
| 58255695 | 18570516 | 5615897  | 5945727  | 9388284  | 45200042 | 37489703 | 40853374 | 67544030 | 70823035 |
| 23687026 | 12474358 | 145684.7 | 171462.8 | 181111.4 | 244997.3 | 233830.1 | 18134525 | 4709840  | 27505374 |
| 246349.8 | 98202.94 | 11864.44 | 31649.58 | 19138.03 | 106420.5 | 182915.5 | 264527.8 | 182974.9 | 163932   |
| 66988.14 | 80376.58 | 392273.9 | 421402.6 | 1042474  | 937722.7 | 420741.3 | 64180.21 | 10500.07 | 20004.71 |
| 3319983  | 1545072  | 2683.827 | 15416.62 | 22543.43 | 1133523  | 2019540  | 5401353  | 1833959  | 2614442  |
| 59042.78 | 63931.11 | 311333.2 | 223830.9 | 700463.5 | 657205.9 | 337773.5 | 68270.64 | 6902.147 | 28397.21 |
| 489261.2 | 218989.8 | 2619734  | 1685676  | 4988410  | 5489410  | 2789625  | 805266.4 | 219828.7 | 461919.5 |
| 770359.4 | 285149.9 | 16971.76 | 26208.72 | 89781.21 | 376883.1 | 620105.2 | 725089.2 | 457016.1 | 737504.5 |
| 1591595  | 545441.9 | 165872.9 | 123382.4 | 239384   | 1276664  | 901108.8 | 1015367  | 2104877  | 2026229  |
| 392874.6 | 257506.6 | 1611240  | 901777.5 | 2442582  | 2672140  | 1159025  | 785042.2 | 102403.5 | 237530.6 |
| 529817.3 | 61483.39 | 403069.8 | 473772.8 | 409004.5 | 431442.7 | 405521.6 | 594025.8 | 431350.9 | 547635.9 |



|          |          |          |          |          |          |          |          |          |          |
|----------|----------|----------|----------|----------|----------|----------|----------|----------|----------|
| 1556537  | 577390.4 | 17585.71 | 6247.217 | 11091.16 | 908554.2 | 1190368  | 1849839  | 1005168  | 1334040  |
| 5890688  | 1786094  | 409993.2 | 432559.4 | 796847.5 | 3748393  | 4863428  | 7570871  | 3845652  | 5013558  |
| 402766   | 261498.6 | 1029588  | 1384159  | 1144360  | 1344206  | 430433.3 | 291035.4 | 750751.8 | 545360.2 |
| 761706.8 | 402954.7 | 1514581  | 1954684  | 1733452  | 1493573  | 934641.2 | 538867.2 | 1228136  | 205774.6 |
| 53500.44 | 64617.36 | 139056.8 | 533968.9 | 225857.9 | 346316   | 287226.8 | 72104.41 | 0        | 8919.942 |
| 988006.4 | 415955.6 | 61055.97 | 132139   | 69202.43 | 520635.6 | 600902.6 | 1095846  | 636933.7 | 652327.1 |
| 109917.2 | 59103.59 | 0        | 0        | 0        | 0        | 16775.11 | 146775.9 | 5650.051 | 121029.1 |
| 368591   | 150502.5 | 1063031  | 1389211  | 1261539  | 1375684  | 376696.3 | 366798.3 | 482179.8 | 377320.9 |
| 3219866  | 1266217  | 302000.1 | 385840.6 | 446665.6 | 2134394  | 1853244  | 1914843  | 4113765  | 3598523  |
| 869115.4 | 618848.6 | 997043.3 | 3835308  | 3935866  | 3150142  | 4918063  | 1502008  | 449120.3 | 561994.7 |
| 444182.8 | 201572.2 | 4137.996 | 0        | 5156.348 | 32715.33 | 375477.9 | 611881.2 | 106596.5 | 493056.5 |
| 20990515 | 9529883  | 1503175  | 2045921  | 2522183  | 10640315 | 7263778  | 10294991 | 30361889 | 27086486 |
| 33606.48 | 22425.86 | 205087.8 | 85901.79 | 260153.9 | 190646.1 | 88889.59 | 62526.5  | 21901.65 | 5694.891 |
| 8233416  | 3830050  | 45814.14 | 53703.48 | 82361.79 | 3411127  | 5088451  | 10961043 | 4693337  | 6026169  |
| 71131.2  | 47574.24 | 338694   | 133368.7 | 462470.6 | 232120.2 | 244071   | 123186   | 26238.09 | 29419.39 |
| 530082.9 | 223483.4 | 134624.8 | 172088.8 | 208561.8 | 99365.5  | 83197.32 | 357123.5 | 444132.8 | 311563.7 |
| 279954.7 | 142364.8 | 32199.71 | 24742.94 | 12565.38 | 26967.63 | 26152.62 | 362684.8 | 108346.1 | 144231.3 |
| 4526424  | 2078993  | 4207.708 | 15640.76 | 117916.5 | 1936870  | 2953686  | 5848090  | 2731030  | 3162218  |
| 4025719  | 2120901  | 296627.1 | 289957.3 | 269650.5 | 100888.1 | 208654.2 | 3834026  | 1009686  | 3198668  |
| 2999080  | 951759   | 8896.263 | 20344.51 | 12605.47 | 132723.9 | 3112735  | 4082776  | 3951542  | 2477363  |
| 3080023  | 1552795  | 271592.1 | 254218.2 | 291762   | 293267.4 | 452900.7 | 3889416  | 735730.4 | 2259060  |
| 11118821 | 5340976  | 258729.7 | 334924.7 | 325508.6 | 3509080  | 6666814  | 16334815 | 5841834  | 8610968  |
| 6898700  | 3719519  | 323402.6 | 293320.3 | 127821.5 | 220280.2 | 424957.4 | 9561126  | 10560046 | 2092956  |
| 4066659  | 2264837  | 52205.1  | 28139.62 | 33226    | 67785.85 | 66328.15 | 3933826  | 423101.2 | 4144819  |
| 1924531  | 1078354  | 19059.93 | 16589.88 | 8818.469 | 13497.63 | 15193.28 | 3120972  | 227441.3 | 1701776  |
| 12711266 | 3319066  | 1006852  | 505136.7 | 2380892  | 8812627  | 10747850 | 13387581 | 9178900  | 10522888 |
| 854497.6 | 464703.7 | 10820.56 | 12298.41 | 38141.96 | 50765.5  | 84549.01 | 171106.4 | 793875.3 | 1140317  |
| 98367.82 | 95455.23 | 618235.7 | 1530635  | 985494   | 1137965  | 293903.1 | 92226.53 | 40815.37 | 27854.28 |
| 655886.5 | 344129.6 | 21894.23 | 31796.28 | 40923.28 | 80874.84 | 123450.1 | 845867.3 | 992733.3 | 647378.4 |
| 216461.9 | 127204.4 | 866001.7 | 521696.5 | 1907433  | 1699031  | 1029902  | 340414.6 | 100999.2 | 89215.6  |
| 5278458  | 1900790  | 324349.3 | 143137.5 | 573454.5 | 3604781  | 3921223  | 7589607  | 4118349  | 4318056  |
| 482623.2 | 253188.2 | 12737.27 | 54343.42 | 43638.44 | 21762.89 | 99915.05 | 673973.7 | 140439.6 | 281285.1 |
| 1231368  | 575956   | 217325.5 | 233516.3 | 227920.2 | 126486.1 | 464320.3 | 1515560  | 521225.8 | 699845.6 |
| 4252688  | 1999151  | 98143.78 | 118755.4 | 111480   | 1675266  | 2802207  | 5793763  | 2307255  | 3324200  |
| 295190.2 | 177023.9 | 549109.6 | 758294.4 | 708641.4 | 543410   | 424809.5 | 452527.2 | 209346.9 | 230716.7 |
| 6830829  | 3810930  | 256291.7 | 257818.1 | 306521.7 | 43591.04 | 186850.4 | 6539807  | 1467033  | 5343025  |
| 1353706  | 729012.6 | 64544.07 | 80970.37 | 116520.9 | 30285.93 | 159485.1 | 1424375  | 327839.6 | 962267.8 |
| 4170403  | 997252.7 | 417019.3 | 152860.2 | 810537.6 | 2950714  | 3579980  | 4415881  | 3154813  | 3366294  |
| 9356370  | 5343229  | 70963.55 | 77785.18 | 64173.87 | 63817.7  | 98726.74 | 11451007 | 1219109  | 7264463  |
| 189269.8 | 76933.53 | 9041.381 | 0        | 19010.61 | 7772.127 | 182641.8 | 278108.4 | 180996.6 | 143312.1 |
| 593938.1 | 238959.4 | 2785603  | 1673552  | 5780877  | 6095770  | 3217328  | 949799   | 316479.5 | 522630.5 |
| 165755.6 | 117817.4 | 803977.3 | 477457   | 1219383  | 1238343  | 390898.4 | 326579.1 | 41857.47 | 64132.38 |
| 6208753  | 3315018  | 320195.2 | 310863.8 | 463569.9 | 775611.7 | 679920.8 | 6039357  | 1377346  | 5184033  |
| 30545.97 | 45885.3  | 436147.7 | 234180.6 | 315601   | 219094.9 | 65531.16 | 11518.61 | 0        | 19072.15 |
| 2199666  | 1243611  | 37554.78 | 47045.58 | 22413.29 | 130685.9 | 77346.65 | 3301989  | 483910.5 | 1286294  |
| 377645.4 | 127714.8 | 1245896  | 1597010  | 1406305  | 880757.1 | 467961.8 | 206685.4 | 513052.7 | 396462.7 |
| 324613.8 | 162734.8 | 9775.112 | 21958.34 | 11937.24 | 59589.3  | 207763.5 | 197376.9 | 107243.9 | 456275.3 |

|          |          |          |          |          |          |          |          |          |          |
|----------|----------|----------|----------|----------|----------|----------|----------|----------|----------|
| 113847.1 | 41219.24 | 569377.7 | 288239.6 | 876605.9 | 946882.3 | 374527.3 | 163472.6 | 83960.04 | 71965.98 |
| 612625.7 | 259377.7 | 51386.3  | 72684.85 | 103719   | 307494.8 | 420839   | 692575.6 | 381610.5 | 446684.7 |
| 738238.9 | 69423.91 | 346231.5 | 417230   | 403520.3 | 576521.2 | 719478.1 | 754793.4 | 651129.8 | 769272.2 |
| 1193435  | 699073.5 | 0        | 0        | 3502.489 | 6389.881 | 6875.256 | 1105037  | 124309.6 | 1508776  |
| 7548920  | 4430994  | 0        | 2490.746 | 10169.48 | 17230.75 | 6171.518 | 10290335 | 637194.2 | 5855408  |
| 1.03E+08 | 33535364 | 6784936  | 1132110  | 14390839 | 72460164 | 81704963 | 1.4E+08  | 70407166 | 86606057 |
| 315814.7 | 108132.9 | 2709649  | 2294037  | 2444747  | 1154500  | 618058   | 421563.7 | 429737.4 | 280510.7 |
| 1527196  | 807229.5 | 59165.6  | 125592.5 | 148023.6 | 217626   | 277070.3 | 890980.7 | 714023.9 | 2372418  |
| 91920828 | 53561531 | 5025100  | 56942.55 | 38661.72 | 140382.6 | 147818.3 | 1.47E+08 | 21966165 | 50552534 |
| 79109.59 | 48469.92 | 169380.7 | 169549.4 | 146573.9 | 307177.4 | 153998.7 | 62050.08 | 77887.46 | 7818.379 |
| 389881.1 | 225150   | 0        | 7191.348 | 3848.87  | 0        | 32855.72 | 491400.5 | 50932.69 | 323291.5 |
| 521103.3 | 489710.6 | 4180256  | 10508093 | 6842721  | 7600650  | 1681465  | 784884.6 | 271094.6 | 100554.3 |
| 10863733 | 2978450  | 2030201  | 1269717  | 4904086  | 2514451  | 10900270 | 12993118 | 9920784  | 9374869  |
| 97412.69 | 32161.22 | 35200.43 | 33176.34 | 31919.47 | 36482.85 | 85516.2  | 70041    | 119704.8 | 67630.27 |
| 203190   | 28084.53 | 493908.1 | 660151.3 | 632312.8 | 627018.4 | 200364.2 | 216136.4 | 210413.8 | 177969.1 |
| 16063097 | 9504009  | 6056.906 | 5877.135 | 16415.56 | 22237.41 | 7637.845 | 18847204 | 2342774  | 11668083 |
| 14310.48 | 15898.98 | 98366.22 | 95967.43 | 218083.7 | 263813.8 | 83187.8  | 7306.371 | 14177.42 | 8797.868 |
| 959349.5 | 567068.3 | 6675.866 | 2716.459 | 4103.499 | 8048.124 | 0        | 1473693  | 64654.08 | 796534.3 |
| 1.27E+08 | 75229722 | 38579.73 | 33881.33 | 780555.3 | 18699.64 | 30460.78 | 2.1E+08  | 11588723 | 99911162 |
| 197756.7 | 216185.1 | 1825643  | 4827089  | 2968077  | 3304609  | 784721.9 | 304722.2 | 61010.08 | 33617.22 |
| 416538.7 | 381257   | 517204.3 | 958809.3 | 1333728  | 1579817  | 1595051  | 678641.7 | 207392.6 | 111495   |
| 122357.3 | 51982.43 | 7894.009 | 12909.12 | 6527.459 | 26857.85 | 111328.8 | 74453.62 | 209346.7 | 126375.2 |
| 236261.9 | 106919.3 | 644390.3 | 847564.9 | 768016.5 | 356298.1 | 364303   | 227668.7 | 340037.1 | 80397.55 |
| 70138.57 | 40587.1  | 152256.7 | 98447.5  | 287780.5 | 333735.1 | 308566.7 | 41653.96 | 23444.6  | 61399.27 |
| 39155444 | 23105265 | 332075.5 | 343368.2 | 536012.5 | 622163.1 | 156241.6 | 41986991 | 6263562  | 27685618 |
| 1123704  | 463686.6 | 373540.6 | 361247.1 | 337810.2 | 315502.9 | 349663   | 1175313  | 402592.4 | 993003.8 |
| 4463065  | 2621740  | 59995.22 | 56733.43 | 69854.71 | 86313.61 | 81870.67 | 4486507  | 209034.1 | 4600213  |
| 2798350  | 1668160  | 3174.197 | 9248.221 | 0        | 0        | 14370.26 | 4348365  | 236687.1 | 2074227  |
| 954943.7 | 562593   | 3144.37  | 8264.641 | 10837.53 | 15493.61 | 30147.01 | 1096938  | 160351.9 | 840520.9 |
| 255822.4 | 154659.2 | 465332.3 | 626427.4 | 488592.1 | 451233.7 | 469890.4 | 264034   | 489488.6 | 62625.69 |
| 162900.8 | 75965.92 | 0        | 12238.07 | 0        | 119452.6 | 67195.87 | 173637.5 | 165556.9 | 117671.4 |
| 162147.9 | 58384.99 | 274555.9 | 330685.5 | 304728.9 | 357548.8 | 164802.2 | 232078.1 | 219767.4 | 120618.8 |
| 1660396  | 836605.3 | 121815.8 | 199434.2 | 195763.3 | 409363.9 | 571719.6 | 1079909  | 692998.4 | 2385712  |
| 3597044  | 2115273  | 76191.46 | 38154.61 | 34804.12 | 205551.3 | 27718.6  | 4826560  | 459454.8 | 2558516  |
| 1041910  | 862289.7 | 7816846  | 20229737 | 13257131 | 14565269 | 3201876  | 1384346  | 505146.1 | 472643.1 |
| 83951.03 | 115092.7 | 235080.9 | 141359.7 | 324895.3 | 503309.5 | 390217   | 30346.24 | 19052.52 | 43341.1  |
| 1471296  | 684803.1 | 112556.2 | 48094.42 | 801086.7 | 178034.5 | 812950.8 | 922402.9 | 2222417  | 1672059  |
| 986118.8 | 575710.5 | 0        | 3026.973 | 10543.35 | 71748.9  | 68305.26 | 1436876  | 211558.9 | 698944.5 |
| 2701708  | 1105865  | 878256.6 | 1163648  | 843291.8 | 829609   | 714512.8 | 1801533  | 3293700  | 3448287  |
| 6419647  | 3855808  | 2804.563 | 3826.704 | 6024.551 | 15191.23 | 26058.91 | 7156448  | 949199.4 | 4211108  |
| 2091230  | 299129.1 | 1358063  | 1635283  | 1630926  | 1890216  | 1559500  | 2303695  | 1800782  | 1829975  |
| 4100497  | 2063219  | 90352.44 | 207985.6 | 133908   | 1324793  | 2542149  | 6288159  | 2101550  | 2958281  |
| 2327100  | 1325772  | 161604.1 | 144892.6 | 74748.93 | 89963.76 | 182257.4 | 3479753  | 3724560  | 830327.6 |
| 17127370 | 10335806 | 14052.68 | 4183.718 | 33754.2  | 0        | 12806.76 | 26613286 | 1439246  | 12741179 |
| 13616.02 | 10213.82 | 122857.8 | 70286.26 | 262572   | 157899.4 | 84186.47 | 30794.96 | 13244.35 | 6064.339 |
| 278600.7 | 189893.8 | 603381   | 783407.5 | 657058   | 728768.2 | 313687.8 | 508087   | 81585.81 | 384746.5 |
| 5129194  | 3060470  | 93457.82 | 82439.93 | 81408.62 | 54010.59 | 25335.86 | 7010702  | 977554.9 | 2791830  |

|          |          |          |          |          |          |          |          |          |          |
|----------|----------|----------|----------|----------|----------|----------|----------|----------|----------|
| 575021   | 327097.4 | 33265.9  | 35525.79 | 40659.53 | 37399.76 | 32363.16 | 679534.1 | 92116.24 | 438397.1 |
| 27741250 | 16841651 | 0        | 3130.048 | 109150.3 | 3525.809 | 0        | 46269146 | 1954424  | 21719483 |
| 11870718 | 7193144  | 75380.44 | 51411.16 | 103909.2 | 61427.92 | 11598.26 | 12883839 | 1631637  | 8209511  |
| 1476764  | 893899.5 | 0        | 9051.35  | 6679.517 | 10636.87 | 20945.7  | 2407237  | 109377.1 | 1110458  |
| 17661252 | 9007261  | 1023033  | 1327892  | 1663482  | 6474735  | 6878984  | 6884613  | 24865208 | 26444481 |
| 290604.7 | 278343.8 | 2536895  | 6533227  | 4111061  | 4492952  | 933974.6 | 421899.5 | 59700.46 | 136991   |
| 10623167 | 6398197  | 169927.6 | 180130.2 | 163792.2 | 77462.2  | 45559.67 | 10393639 | 2313725  | 6706510  |
| 321307.7 | 156902.4 | 46408.19 | 58793.87 | 88624.2  | 33317.84 | 125703.1 | 364473.4 | 86370.32 | 249868.3 |
| 964295.5 | 361395.2 | 314022.8 | 451255.1 | 388039.9 | 297555.3 | 495380.2 | 1348643  | 528807   | 728130.5 |
| 560583   | 338470.8 | 0        | 9208.909 | 8407.193 | 8613.092 | 14802.39 | 857430   | 51604.3  | 379029.1 |
| 4800516  | 2891282  | 125872.3 | 141179.6 | 77182.84 | 17556.64 | 66636.45 | 5560396  | 851104.7 | 2951190  |
| 361158.9 | 206571.4 | 5748.085 | 11998.76 | 12652.88 | 98388.9  | 23555.06 | 565146.3 | 47062.26 | 276284.4 |
| 2039975  | 1148965  | 160828.7 | 192724.7 | 216531.6 | 58421.31 | 232352.4 | 1864061  | 546300.1 | 1422949  |
| 30305551 | 18539026 | 88511.07 | 181556.8 | 92864.71 | 262592.8 | 54503.87 | 31699680 | 4273659  | 21352554 |
| 607496.5 | 350966.7 | 65167.52 | 48248.23 | 36343.35 | 16044.14 | 23057.87 | 552032.1 | 139020.9 | 444728.6 |
| 3968471  | 747268.1 | 13174563 | 16306437 | 10927765 | 9199519  | 4790377  | 4089671  | 5004656  | 3245576  |
| 2354369  | 1416563  | 59701.07 | 58898.78 | 27922.49 | 72658.36 | 46934.49 | 2409769  | 409922.5 | 1738899  |
| 4975878  | 3025256  | 123939.2 | 123052.3 | 62496.7  | 16161.87 | 0        | 5573221  | 747332.5 | 3200915  |
| 3091680  | 1824073  | 128996.7 | 87967.09 | 82566.35 | 169941.2 | 189108.3 | 3920759  | 403719.9 | 2060662  |
| 1747814  | 1072838  | 9449.425 | 0        | 3498.455 | 14970.44 | 6787.03  | 2856853  | 303627.5 | 1116719  |
| 105461.5 | 62257.2  | 2503.429 | 6066.716 | 0        | 17843.68 | 0        | 172067.7 | 11240.84 | 80336.35 |
| 17582976 | 4944375  | 2320058  | 2984106  | 3318997  | 15406804 | 12897446 | 14542883 | 18883315 | 19340231 |
| 6338673  | 3799647  | 105632   | 105415.4 | 121889   | 381526.5 | 213547.3 | 7626444  | 778082.2 | 4286601  |
| 480473.5 | 291841.8 | 2546.605 | 2776.034 | 0        | 0        | 36649.13 | 609491.3 | 54578.39 | 328248.1 |
| 1569302  | 924218.9 | 42972.06 | 68162.38 | 71112.44 | 31017.71 | 166642.2 | 2143755  | 315492.7 | 843273.5 |
| 758681.6 | 171571.4 | 766399.7 | 1270453  | 1303963  | 1553498  | 1134553  | 545484.3 | 983897.9 | 872771.1 |
| 975180.7 | 599509.4 | 9172.044 | 0        | 0        | 8074.317 | 8175.01  | 1322603  | 52195.35 | 731806.8 |
| 15153554 | 9364176  | 29687.16 | 23868.29 | 7730.419 | 8065.969 | 51869.55 | 19833827 | 2455535  | 7973935  |
| 336376   | 235657.3 | 1402134  | 775479.7 | 3056558  | 3178751  | 1633337  | 397660.7 | 62309.07 | 210037   |
| 56412547 | 34271923 | 269195   | 305925.6 | 461892.4 | 2791491  | 1754773  | 84141624 | 5028513  | 37190321 |
| 2804608  | 1735584  | 0        | 3983.623 | 3299.078 | 12904.89 | 0        | 3354210  | 385619.7 | 1839397  |
| 5912845  | 3645910  | 11803.63 | 3296.627 | 12949.76 | 3533.262 | 152777.6 | 9145311  | 449006.8 | 4303302  |
| 389758.7 | 239126.2 | 2396.311 | 7280.975 | 3643.151 | 9148.262 | 0        | 722352.9 | 65666.25 | 295243.8 |
| 2344165  | 1387020  | 180511.6 | 181042.1 | 135045.9 | 21543.93 | 47985.14 | 3626944  | 410841.9 | 1408013  |
| 174539.3 | 37774.98 | 220073.5 | 326973.4 | 259238.6 | 442990   | 279926.1 | 158027.3 | 162321.6 | 151131.2 |
| 2489907  | 1518532  | 29255.56 | 56063.49 | 66754.5  | 40468.19 | 44825.92 | 3324712  | 303991.7 | 1546485  |
| 1500996  | 931582.5 | 3328.773 | 9034.612 | 4494.649 | 0        | 0        | 2674037  | 195771.4 | 1146408  |
| 170459.1 | 54495.52 | 7988.86  | 23379.51 | 5136.63  | 88213.95 | 166675.7 | 136457.3 | 92471.75 | 200527.8 |
| 14276407 | 8818039  | 112787.4 | 116335.4 | 95481.65 | 182117.7 | 36856.66 | 17512995 | 2282922  | 8232613  |
| 7509509  | 4644687  | 88861.2  | 70252.18 | 44998.42 | 21576.56 | 35290.93 | 10046317 | 1102029  | 4469184  |
| 244886.5 | 138953.9 | 4436.814 | 0        | 5948.979 | 53853.24 | 80349.05 | 232611.1 | 143591.4 | 203774   |
| 328379.1 | 95515.71 | 1237851  | 879913.9 | 2142605  | 706324.5 | 1081394  | 175984.8 | 337922.8 | 430984.6 |
| 1465943  | 905275.2 | 5241.966 | 2691.417 | 13283.89 | 43108.28 | 52081.89 | 1899871  | 221013.2 | 881310.2 |
| 2739547  | 1715712  | 6277.477 | 8251.074 | 0        | 4740.498 | 5756.354 | 4867065  | 227989.6 | 2132474  |
| 745747.2 | 458621.5 | 8596.049 | 10204.16 | 19391.02 | 16685.34 | 22039.81 | 1127183  | 82218.12 | 476946.1 |
| 3008224  | 1530302  | 47709.18 | 413523.9 | 108639.7 | 1527616  | 1342848  | 1355120  | 4906542  | 3992819  |
| 3744919  | 2257434  | 146711.6 | 169056.3 | 175028.3 | 210962.3 | 59500.08 | 3863971  | 309932.3 | 3046262  |

|          |          |          |          |          |          |          |          |          |          |
|----------|----------|----------|----------|----------|----------|----------|----------|----------|----------|
| 2.97E+08 | 1.86E+08 | 145692.3 | 191256   | 196896.5 | 168265.5 | 124419.3 | 4.17E+08 | 24838756 | 1.79E+08 |
| 4106974  | 2564725  | 0        | 30117.68 | 2780.553 | 74604.33 | 25507.75 | 4596902  | 713388.8 | 2276975  |
| 45665.78 | 63612.66 | 393346.4 | 1255425  | 768647.5 | 836879.8 | 200506.2 | 57378.2  | 0        | 0        |
| 77874.06 | 22857.51 | 112826.9 | 158201.7 | 116445.7 | 252952.5 | 206591.4 | 86866.77 | 84227.81 | 89730.22 |
| 430641.1 | 153626.9 | 21473.41 | 12008.15 | 44565.98 | 293919   | 362380.8 | 461803.9 | 260130.5 | 282001.6 |
| 3390077  | 1413346  | 1155841  | 1350587  | 1045765  | 1191640  | 1037557  | 2592032  | 2253966  | 5674927  |
| 2874064  | 1764307  | 117075.6 | 126715.1 | 102065.5 | 42526.62 | 0        | 4068581  | 669689.8 | 1278013  |
| 62434.61 | 74905.53 | 322240.7 | 257098.5 | 705080   | 912440.9 | 331851.4 | 98223.24 | 0        | 16744.84 |
| 33703912 | 21192768 | 155497   | 191207.2 | 168860.4 | 286652.5 | 104374.6 | 42329293 | 2980300  | 21528280 |
| 123071.2 | 44661.5  | 407204.6 | 578224   | 559643.7 | 819283.7 | 154693.2 | 149579.8 | 75321.32 | 109593.4 |
| 587162.3 | 363349.9 | 12808.13 | 0        | 0        | 30072.7  | 23016.12 | 784663.7 | 79428.6  | 370518.7 |
| 1486041  | 935015.1 | 0        | 10196.44 | 7623.784 | 9768.714 | 15999.7  | 2292129  | 75606.39 | 1214956  |
| 34621.21 | 22760.87 | 66164.82 | 98413.75 | 191791.5 | 180991.3 | 79559.94 | 31613.49 | 32509.22 | 6681.836 |
| 2218040  | 1403471  | 2624.333 | 0        | 6922.699 | 15598.08 | 0        | 2166322  | 285068.1 | 1616176  |
| 838386.3 | 527877.4 | 2398.54  | 14325.18 | 8009.896 | 9145.806 | 0        | 1197082  | 65692.98 | 513209.4 |
| 2576200  | 1503791  | 47776.14 | 23633.34 | 70548.5  | 563765.3 | 515867.3 | 2278279  | 2740801  | 1968605  |
| 236758.2 | 149852.7 | 4252.991 | 0        | 0        | 0        | 0        | 328646.3 | 182104.8 | 88241.97 |
| 11255262 | 7003787  | 231386.8 | 318194.8 | 342438.2 | 177025.5 | 91240.6  | 17078152 | 720095.4 | 7432318  |
| 29947.63 | 34851.29 | 159446.4 | 115269.4 | 350669.6 | 211268.7 | 91867.95 | 14629.97 | 0        | 0        |
| 2427779  | 1500437  | 123716.9 | 138429.4 | 38914.75 | 23593.8  | 15064.09 | 3675362  | 483374.7 | 1155899  |
| 175391.5 | 89414.11 | 0        | 4620.139 | 0        | 66737.78 | 125212.8 | 327666.7 | 180903.4 | 105304.2 |
| 746612.5 | 291172.6 | 16267.23 | 45800.16 | 24434.83 | 489486.5 | 616605.9 | 1045948  | 637528.8 | 584549.8 |
| 264944.8 | 167790.1 | 3905.565 | 0        | 0        | 3825.842 | 0        | 411860.9 | 10869.63 | 217760.4 |
| 1417285  | 645212.5 | 466595   | 478863.6 | 385566   | 355577.4 | 357444.6 | 1251762  | 1466050  | 2357520  |
| 6698791  | 4118562  | 208033.2 | 301145   | 266737   | 236434.2 | 175049.1 | 11071960 | 464425.4 | 5016682  |
| 320383   | 62145.79 | 548545   | 706468.3 | 457324.5 | 559417.3 | 341297.6 | 315672.9 | 278550.4 | 242967.2 |
| 1331414  | 714222.3 | 62366.61 | 41470.39 | 121196.8 | 247808.5 | 838492.5 | 1647486  | 655844.9 | 496091.9 |
| 12568963 | 7908888  | 238399.2 | 243229.4 | 173998.9 | 97949.89 | 67902.16 | 15092828 | 1496147  | 7402686  |
| 352352.7 | 221929.7 | 2908.645 | 3946.118 | 4262.044 | 5181.442 | 6304.428 | 631239.1 | 18464.17 | 310757.4 |
| 293942.4 | 179674.8 | 3270.939 | 0        | 0        | 0        | 87730.73 | 433458.9 | 41037.3  | 180564.6 |
| 503411.7 | 307743.2 | 19063.12 | 35526.94 | 8057.381 | 26887.35 | 20072.87 | 406126.7 | 101268.5 | 387785.1 |
| 65380379 | 41464304 | 526075.5 | 716406.5 | 672299.3 | 339533.2 | 255205.8 | 91256376 | 4755586  | 39432165 |
| 685172.3 | 436193.7 | 6381.431 | 0        | 0        | 0        | 7244.126 | 812601.6 | 44885.88 | 567677.7 |
| 135587.9 | 135864   | 1303971  | 3386093  | 2152342  | 2386230  | 350974.5 | 165787.9 | 46542.98 | 27786.75 |
| 100028.7 | 36240.91 | 150475.9 | 181043.2 | 141435.2 | 126315.9 | 219645.1 | 115037.9 | 51510.99 | 73611.95 |
| 2404071  | 1516673  | 45382.45 | 51387.51 | 59952.88 | 17753.88 | 12286.69 | 3256945  | 245716.9 | 1447686  |
| 2643423  | 1633457  | 74938.77 | 102847.5 | 87718.94 | 119096.4 | 88750.91 | 3439480  | 261338.4 | 1639902  |
| 2653114  | 1674011  | 40738.51 | 32451.3  | 47317.13 | 67699.3  | 67499.53 | 3014417  | 366842.2 | 1857433  |
| 2141521  | 1332360  | 101991.3 | 123831   | 88877.67 | 46835.38 | 0        | 3041574  | 309596.1 | 1363154  |
| 1021482  | 651992.2 | 11336.15 | 6451.195 | 9928.183 | 6908.561 | 6429.5   | 1035414  | 72739.2  | 765915.5 |
| 1852111  | 1127822  | 109260.7 | 127660.6 | 107635.6 | 87515.8  | 71842.54 | 2031451  | 244788.5 | 1259815  |
| 2037911  | 1306139  | 5533.814 | 5162.17  | 3644.172 | 27814.06 | 8761.474 | 2508153  | 156221   | 1352918  |
| 1178557  | 217065.7 | 2638828  | 2971657  | 2786216  | 1927192  | 1170251  | 1260084  | 1355438  | 1127136  |
| 19181.5  | 19066.34 | 221715.6 | 140723   | 569120.6 | 509569.6 | 186919.5 | 42210.05 | 0        | 32779.75 |
| 1347085  | 848454.4 | 43509.52 | 31288.38 | 23051.52 | 6768.442 | 52295.08 | 1911270  | 144031.8 | 753190.6 |
| 4054533  | 2523207  | 181242.1 | 222513.8 | 185046.6 | 51043.19 | 80478.06 | 5406180  | 487611.4 | 2327279  |
| 383414.4 | 245750.3 | 2759.687 | 9894.425 | 0        | 0        | 0        | 368877.5 | 58899.79 | 315673.2 |

|          |          |          |          |          |          |          |          |          |          |
|----------|----------|----------|----------|----------|----------|----------|----------|----------|----------|
| 132598.4 | 38050    | 73740.5  | 89372.51 | 85761.79 | 74141.56 | 56008.3  | 130859.5 | 83216.69 | 111129.2 |
| 3823535  | 2150974  | 601531.1 | 380011.9 | 444235.6 | 406268.1 | 652348.2 | 2588638  | 7308623  | 2466401  |
| 7744543  | 3821362  | 556612.9 | 811273.7 | 951456.1 | 4789922  | 3304831  | 3618911  | 10285100 | 10073095 |
| 912705.6 | 583759.6 | 3315.311 | 14937.74 | 21072.36 | 7895.804 | 0        | 1677301  | 47674.64 | 828603.1 |
| 1259101  | 651162.9 | 223754.7 | 201039.8 | 240837.7 | 243645.4 | 377255.6 | 1214112  | 372084.5 | 928262.3 |
| 994915.7 | 546244.7 | 55026.08 | 30597.38 | 129928.4 | 141632.3 | 579101.6 | 1770350  | 738759.7 | 1170775  |
| 81680.6  | 26520.11 | 169767.1 | 222247.2 | 207072.4 | 109040.6 | 103631.1 | 110373.3 | 43531.38 | 98121.18 |
| 112396.4 | 42575.04 | 8277.76  | 0        | 3705.837 | 59327.97 | 106417.6 | 113930   | 74084.82 | 65158.12 |
| 608109.4 | 353984.9 | 3526.496 | 3839.871 | 0        | 14640.88 | 403661.9 | 856014.3 | 199336   | 619665.4 |
| 8829026  | 5525584  | 295596.2 | 300880.1 | 352316.4 | 294939.9 | 302245.2 | 8840316  | 1211818  | 6058966  |
| 604750.2 | 392326.3 | 0        | 0        | 0        | 0        | 0        | 821959.9 | 1052836  | 0        |
| 1673758  | 1085003  | 2360.821 | 0        | 0        | 0        | 5538.579 | 2152729  | 166013.6 | 1127379  |
| 4364870  | 2586135  | 374136   | 471851   | 425866.5 | 98187.53 | 574251.4 | 4084086  | 1046255  | 2829499  |
| 1063361  | 670418.5 | 5271.961 | 17843.63 | 17144.82 | 54620.25 | 61505.7  | 1826084  | 618029.6 | 717743.5 |
| 34518    | 40811.17 | 163446.8 | 149468.3 | 361602.5 | 356583.8 | 86781.62 | 86183.92 | 0        | 16193.82 |
| 834545.7 | 270976.6 | 7151884  | 6193305  | 5700901  | 2642281  | 1389659  | 1041103  | 1151976  | 727715.2 |
| 4693941  | 2986656  | 41561.1  | 57561.98 | 57288.96 | 98807.73 | 230321.3 | 6981620  | 383731   | 2732233  |
| 7722989  | 5009811  | 3004.368 | 4888.936 | 3460.874 | 30379.37 | 7587.934 | 9378009  | 1138361  | 6154614  |
| 331473.2 | 187632.3 | 40261    | 32124.98 | 43461.79 | 73092.07 | 30639.62 | 420364.7 | 63341.3  | 212332.9 |
| 47525686 | 30827424 | 117106.3 | 137338   | 106673.4 | 248030.1 | 38764.54 | 75192001 | 3197778  | 28800740 |
| 517460.1 | 304163.4 | 66141.34 | 112602.4 | 35949    | 31944.44 | 19427.51 | 867273.1 | 47726.73 | 439024.2 |
| 2607169  | 1661069  | 63181.21 | 55188.67 | 64829.19 | 54599.38 | 30999.47 | 4352931  | 244808.3 | 1582556  |
| 380748.3 | 220582.7 | 8747.415 | 7418.922 | 38600.76 | 23033.29 | 195178.1 | 590983.1 | 319700.2 | 624729   |
| 66452897 | 43130297 | 129241.9 | 127497.1 | 175504.8 | 269552.3 | 170070.9 | 1.08E+08 | 5196883  | 41579947 |
| 904185.9 | 223729   | 3270.892 | 9671.406 | 79301.82 | 92519.65 | 1042624  | 801196.4 | 892402   | 1083623  |
| 1399879  | 894764.3 | 3043.011 | 4023.393 | 15877.93 | 42177.18 | 68677.7  | 1583321  | 185966.2 | 897754.3 |
| 777491.9 | 499375   | 3083.15  | 3016.38  | 23026.69 | 18703.64 | 6775.27  | 988182.9 | 79981.38 | 606125.5 |
| 5119605  | 3254455  | 216367.5 | 209310.4 | 149844.1 | 7300.693 | 56625.55 | 6715812  | 696249.2 | 2717601  |
| 390077.8 | 250398.2 | 4623.298 | 3263.944 | 7661.19  | 0        | 15345.49 | 399432.5 | 20457.59 | 342590.1 |
| 458361.8 | 223119.5 | 14686.63 | 4763.505 | 18456.64 | 99652.13 | 415219.2 | 543577   | 225959.5 | 376958.4 |
| 106694.8 | 69732.18 | 0        | 0        | 0        | 0        | 0        | 136827.3 | 0        | 78707.5  |
| 2145078  | 1322858  | 88773.41 | 89829.95 | 32048.33 | 154926.6 | 265789.7 | 2162043  | 348109.3 | 1454356  |
| 83771.32 | 54783.78 | 0        | 0        | 0        | 0        | 0        | 134869.8 | 10642.04 | 43717.49 |
| 14396595 | 9337465  | 28965.48 | 41389.38 | 477338.2 | 34778.34 | 28060    | 20558491 | 995909.2 | 8219462  |
| 1523334  | 992491.8 | 24636.93 | 0        | 8885.41  | 0        | 0        | 2542706  | 88126.73 | 997114.8 |
| 344129.3 | 213392.7 | 3623.225 | 0        | 0        | 76271.26 | 28199.51 | 411962   | 47891.25 | 249184.9 |
| 118310.9 | 75578.3  | 5809.804 | 6422.629 | 2683.026 | 0        | 0        | 48722.69 | 112961.8 | 233525.2 |
| 50966.99 | 32896.36 | 0        | 0        | 4098.687 | 0        | 0        | 61368.87 | 4250.814 | 37852.76 |
| 3412545  | 2157204  | 188283.8 | 212874.9 | 118650.1 | 61831.78 | 28446.17 | 3700498  | 388981.4 | 2315858  |
| 9299486  | 6075932  | 0        | 0        | 26862.57 | 40613.76 | 64348.44 | 0        | 14284932 | 11872653 |
| 1587964  | 1030019  | 28693.89 | 31519.45 | 4158.686 | 7934.472 | 12761.55 | 2337993  | 135263.5 | 1087190  |
| 2058334  | 1347188  | 2105.812 | 2751.872 | 0        | 6683.659 | 8634.469 | 2917380  | 161508.8 | 1293238  |
| 8343612  | 5420728  | 113717.7 | 103100   | 97614.96 | 57570.01 | 30935.61 | 7061743  | 1433677  | 5792465  |
| 37132482 | 24333645 | 61302.89 | 101008.1 | 90904.39 | 32132.83 | 70783.73 | 44787697 | 3568279  | 20582500 |
| 80131.08 | 51382.74 | 2577.7   | 3571.463 | 3701.575 | 0        | 0        | 77578.75 | 4957.742 | 62161    |
| 458614.4 | 167838.7 | 3473055  | 3286636  | 3312970  | 1270495  | 754910.3 | 662908.8 | 601088   | 426916.8 |
| 721230.2 | 468453.9 | 6511.041 | 2947.263 | 0        | 15135.86 | 20739.32 | 823023.1 | 67979.27 | 600569.5 |

|          |          |          |          |          |          |          |          |          |          |
|----------|----------|----------|----------|----------|----------|----------|----------|----------|----------|
| 2002241  | 1214412  | 211544.4 | 272736.3 | 259950.6 | 53866.33 | 23359.77 | 1883379  | 412573.8 | 1311131  |
| 65963.55 | 25104.95 | 645228.2 | 978859.8 | 640193.6 | 1078562  | 46649.22 | 97397.75 | 64664.61 | 48540.08 |
| 9650910  | 6322244  | 44603.76 | 59647.93 | 44130.26 | 59099.66 | 77168.64 | 12723387 | 1090778  | 6275859  |
| 467611.2 | 268940.6 | 10471.53 | 10254.18 | 29534.6  | 84000.08 | 237639.1 | 620323.4 | 257215.8 | 267403   |
| 608470.1 | 312170.1 | 663256   | 2706157  | 4851323  | 5807719  | 4047975  | 470470   | 982300.8 | 177660.9 |
| 1875582  | 1141430  | 0        | 0        | 0        | 118477.8 | 917190   | 2599095  | 773833.7 | 1296706  |
| 356971.3 | 227958   | 5108.944 | 6294.704 | 2948.468 | 37132.1  | 10466.46 | 607103.5 | 50718.4  | 244876.2 |
| 52677.77 | 25358.97 | 99888.84 | 109966.6 | 60266.85 | 166991.9 | 110654.5 | 22078.56 | 42756.14 | 53810.28 |
| 26379378 | 17386499 | 74337.69 | 60850.98 | 120283.6 | 54681.67 | 41225.82 | 50780274 | 2233209  | 22881208 |
| 24656.86 | 22694.06 | 467876.2 | 255401   | 257694.5 | 50975.5  | 207670.9 | 0        | 44278.68 | 42530.97 |
| 4616056  | 2958847  | 143418.2 | 222080.8 | 151969.7 | 152302.3 | 38779.97 | 6526132  | 288108.3 | 2767486  |
| 648255.3 | 240235.7 | 6562391  | 3898892  | 6252063  | 2453518  | 1337122  | 813989   | 937318.2 | 590726.3 |
| 1266190  | 833341.1 | 8723.521 | 5159.598 | 0        | 11619.5  | 7818.36  | 1526138  | 142040.9 | 803059.4 |
| 2435827  | 1584466  | 54796.79 | 51513.39 | 34284.27 | 30809.93 | 35231.96 | 2431664  | 313597   | 1577983  |
| 179613.4 | 112944.4 | 2693.721 | 0        | 0        | 4597.099 | 51946.24 | 283617.9 | 0        | 149370.6 |
| 75069.14 | 48651.47 | 0        | 0        | 0        | 9580.68  | 0        | 113162.9 | 0        | 51619.37 |
| 1778015  | 1174062  | 2781.401 | 2864.643 | 4957.451 | 22292.04 | 9671.551 | 1996949  | 275827.8 | 1371056  |
| 161621.9 | 102756.4 | 2839.543 | 3552.949 | 8807.521 | 12783.56 | 6407.094 | 100276.6 | 215032.4 | 112090.6 |
| 10512078 | 6923489  | 35084.32 | 50651.63 | 41556.4  | 71067.51 | 222386.2 | 14836975 | 1217661  | 6360237  |
| 2994265  | 1963937  | 48492.28 | 37752.27 | 15220.24 | 28481.12 | 55434.81 | 4891497  | 385602.2 | 1747203  |
| 46587049 | 26528942 | 1742462  | 2566829  | 3876255  | 16231380 | 13633506 | 12979234 | 70336688 | 74295916 |
| 1221218  | 808702.2 | 0        | 5169.432 | 0        | 0        | 18694.15 | 1587577  | 191201.1 | 703100.5 |
| 1454519  | 949012.8 | 12853    | 17646.38 | 24613.26 | 29657.58 | 51479.45 | 1977797  | 127593.9 | 792053.8 |
| 479361.5 | 307830.4 | 10839.54 | 20692.08 | 6523.575 | 55323.19 | 0        | 550088.3 | 58539.58 | 313791.7 |
| 740610.7 | 461494.4 | 41799.55 | 43896.01 | 76653.37 | 12197.83 | 77330.85 | 1264419  | 94122.21 | 522542.9 |
| 73024786 | 48440297 | 439434.3 | 585017.7 | 509561.2 | 535436.2 | 364360.3 | 1.03E+08 | 3195341  | 42808556 |
| 706746.8 | 456046.2 | 10317.29 | 19148.63 | 10834.04 | 67934.29 | 17088.26 | 768738.5 | 89472.44 | 466712.8 |
| 2027274  | 1350497  | 0        | 2290.279 | 13624.46 | 21001.8  | 0        | 1925089  | 364063.1 | 1098970  |
| 6880360  | 4365483  | 166833.1 | 193317.4 | 224756.9 | 821553.9 | 409872.9 | 6726269  | 923196.5 | 4578402  |
| 8397734  | 4791157  | 536068.8 | 906983.1 | 1139466  | 1715898  | 2157937  | 4852048  | 16515881 | 6267988  |
| 229465.4 | 120536.9 | 459008.9 | 629817.6 | 535766.6 | 209664.6 | 695075.6 | 383236.1 | 195708.1 | 220375.4 |
| 856587.8 | 565643.1 | 2951.578 | 8124.704 | 11430.63 | 21442.12 | 14512.11 | 1452195  | 96075.11 | 630057.1 |
| 8178192  | 5429758  | 85656.29 | 89551.28 | 66020.14 | 84524.31 | 28830.61 | 6956915  | 1656639  | 4872593  |
| 86764.75 | 26828.46 | 303563.5 | 120403.3 | 355606.5 | 402589.5 | 157062.6 | 110204.8 | 80847.45 | 42712.91 |
| 2275697  | 1426223  | 146315.2 | 147964.3 | 150579.5 | 154516.8 | 148215.6 | 2930324  | 283668.5 | 1528874  |
| 722897.6 | 427534.5 | 50574.41 | 50789.85 | 42195.68 | 136433.8 | 175826.3 | 1074591  | 103323.6 | 478021.3 |
| 6.78E+08 | 4.05E+08 | 2.77E+08 | 1.79E+08 | 2051954  | 154870.8 | 3902553  | 1.07E+09 | 6389029  | 7.22E+08 |
| 15441337 | 10155453 | 263010   | 360449.6 | 303464.9 | 419590.2 | 247119.6 | 17989056 | 942889.2 | 9546098  |
| 2171137  | 1436677  | 12193.9  | 18954.68 | 12455.67 | 7771.851 | 114182.4 | 4082044  | 156705.4 | 1639530  |
| 1173974  | 780259.5 | 2284.303 | 3414.792 | 0        | 0        | 60884.96 | 1612698  | 45290.47 | 741996.5 |
| 6255576  | 4075878  | 190521.8 | 193076.7 | 171102.2 | 257583.5 | 167852.3 | 4774797  | 1238718  | 4378679  |
| 25311706 | 17018394 | 35457    | 26678.56 | 24797.87 | 21041.71 | 11591.76 | 26505224 | 3736275  | 13089226 |
| 229723.5 | 142208.4 | 461030.1 | 1800190  | 1127911  | 1689906  | 567881.1 | 269318.1 | 34870.77 | 149975.6 |
| 2312204  | 1452395  | 268981.8 | 266945.2 | 210293.6 | 55311    | 8220.852 | 2904824  | 487165.7 | 1222830  |
| 520568.3 | 347188.5 | 2791.651 | 5688.845 | 0        | 11668.58 | 6453.671 | 757729.6 | 37631.71 | 301662.1 |
| 1578523  | 945092.6 | 0        | 5462.588 | 5579.278 | 295387.1 | 821380.3 | 2312723  | 749620.7 | 943833.4 |
| 13811033 | 9101145  | 353479.9 | 417084   | 597516.3 | 46220.63 | 225838.6 | 13357717 | 1904749  | 9002446  |

|          |          |          |          |          |          |          |          |          |          |
|----------|----------|----------|----------|----------|----------|----------|----------|----------|----------|
| 1063268  | 694520   | 49985.22 | 35275.89 | 40595.6  | 49491.04 | 0        | 931358   | 175589.8 | 746505.9 |
| 1.9E+08  | 1.28E+08 | 98360.71 | 120869.9 | 90089.71 | 160900.2 | 110291.5 | 2.68E+08 | 8804212  | 1.03E+08 |
| 46842.24 | 28389.52 | 94662.26 | 56957.92 | 155159.4 | 218825.7 | 149947.1 | 72540.21 | 79735.34 | 29174.5  |
| 666104.6 | 424499.9 | 0        | 6419.92  | 0        | 234331.1 | 17945.84 | 739414.4 | 39465.35 | 501478.5 |
| 217150.5 | 145279.2 | 0        | 8060.48  | 0        | 4518.762 | 0        | 270553   | 5359.89  | 164954.4 |
| 1049057  | 612616   | 129398.7 | 114904.7 | 125771.4 | 260706.1 | 111510.6 | 1546953  | 194255.6 | 722781.7 |
| 41624.79 | 18936.97 | 141292.3 | 203108.1 | 175592.5 | 94649.47 | 45469.99 | 25131.32 | 73978.54 | 31911.04 |
| 384675.9 | 31163.32 | 397429.3 | 624702.6 | 631683.9 | 854474.2 | 593602.6 | 352829.8 | 433471.5 | 388208.8 |
| 12070859 | 8189338  | 16922.65 | 0        | 5132.198 | 11931.74 | 14749.68 | 19857953 | 547297.2 | 6511378  |
| 16725197 | 10973760 | 402596.9 | 456686.6 | 475010.7 | 801865.7 | 701009.3 | 26758798 | 708966   | 10121209 |
| 601310.1 | 401662.9 | 6803.186 | 10717.2  | 0        | 6810.603 | 26644.9  | 991178.4 | 29752.97 | 439946.8 |
| 141298.5 | 92246.96 | 3759.685 | 5674.13  | 13071.79 | 0        | 6590.127 | 249794.5 | 0        | 132496.6 |
| 452139.1 | 273275.1 | 22549.21 | 51587.57 | 33288.66 | 39176.44 | 122812.3 | 660753   | 88724.85 | 352396.8 |
| 3994236  | 2656654  | 126710.2 | 99214.72 | 101484.9 | 88737.43 | 40383.12 | 4608933  | 455957   | 2112499  |
| 10891136 | 7330685  | 188026.6 | 186638.9 | 141570.2 | 74596.12 | 41062.54 | 12932284 | 1401251  | 5311469  |
| 291917   | 135932   | 1109499  | 1143898  | 214664.4 | 793329.4 | 1341447  | 494646.5 | 328427   | 130297.2 |
| 674312.6 | 445307.7 | 28140.9  | 7396.305 | 12300.63 | 31913.42 | 24911.24 | 1071273  | 62306.55 | 415080.5 |
| 310760.4 | 208854.8 | 3409.27  | 0        | 0        | 20649.61 | 0        | 480125.7 | 7676.88  | 196526.3 |
| 13908998 | 2767786  | 1415522  | 2115381  | 2650606  | 13603892 | 10350140 | 12320311 | 12180845 | 14044360 |
| 123144.2 | 104392.9 | 490830.4 | 194339.7 | 1003709  | 883742.2 | 428694.9 | 307545.1 | 84178.08 | 65631.47 |
| 6103465  | 4106694  | 47303.48 | 90875.2  | 80912.57 | 129530.3 | 83069.76 | 8009207  | 452963.8 | 3132834  |
| 163008.1 | 109432   | 0        | 0        | 0        | 7280.207 | 7103.866 | 232895.5 | 19350.11 | 70507.98 |
| 815248.1 | 461933.5 | 1598547  | 1737127  | 1423077  | 1254265  | 1321542  | 1256098  | 140216.7 | 629162.4 |
| 36081366 | 7540898  | 4924095  | 4983484  | 6508509  | 34483586 | 28059836 | 31697043 | 30601679 | 37982974 |
| 2229483  | 1455113  | 134262.6 | 172924.5 | 107356   | 64664.68 | 32394.68 | 1983452  | 491840.4 | 1475067  |
| 245370.8 | 180263.6 | 871805.8 | 374310   | 2143918  | 1674020  | 1101096  | 546556.9 | 76334.51 | 234057.2 |
| 654327.5 | 446635.8 | 3155.728 | 0        | 0        | 3242.764 | 0        | 1015546  | 7398.991 | 366376.3 |
| 458839.2 | 296862.3 | 14634.17 | 31680.83 | 43265.25 | 11244.91 | 26046.02 | 546407.2 | 15804.62 | 331112.3 |
| 1024571  | 698374.4 | 0        | 5398.118 | 0        | 7150.249 | 8230.007 | 1470332  | 122277.1 | 733720.4 |
| 78438.44 | 21312.99 | 108787   | 131832.4 | 131391.8 | 134856.8 | 76749.78 | 108988.8 | 62085.24 | 72188.03 |
| 1599397  | 1092621  | 0        | 0        | 3651.907 | 6441.996 | 12718.74 | 1912151  | 205384.9 | 1174295  |
| 3925772  | 2521491  | 86354.7  | 102711.5 | 80858.92 | 504835.2 | 524732.2 | 5302999  | 460619.6 | 2269258  |
| 802079.5 | 543663.5 | 5233.284 | 3830.144 | 4443.6   | 7050.729 | 24935.19 | 1242191  | 49184.07 | 404324.8 |
| 4.78E+08 | 2.83E+08 | 2.44E+08 | 1.42E+08 | 2462644  | 1295373  | 3718915  | 7.15E+08 | 82854566 | 3.34E+08 |
| 5373548  | 3513757  | 166057.9 | 189393   | 151236.9 | 373723.5 | 390338.1 | 4434165  | 1079079  | 3885619  |
| 1057345  | 724963.8 | 2346.638 | 0        | 0        | 3639.602 | 0        | 1338586  | 53536    | 660607.1 |
| 1955834  | 1200683  | 195490.8 | 285094.5 | 269321   | 134973.7 | 165891.5 | 2702813  | 279077.3 | 1083905  |
| 576893.4 | 349448.3 | 92934.12 | 106286.4 | 67121.77 | 25238.82 | 58952.87 | 878442.2 | 119041.6 | 320940.2 |
| 103872.1 | 65008.29 | 3914079  | 4711046  | 3443228  | 1524737  | 250696.8 | 121302.6 | 193173   | 77340.77 |
| 3708884  | 2394659  | 99191.25 | 131150   | 167372.8 | 426338.5 | 322192.2 | 3376937  | 593585.3 | 2389930  |
| 11808750 | 8100360  | 29876.85 | 14170.86 | 43121.04 | 29421.95 | 18342.38 | 14447355 | 691815.8 | 6193719  |
| 15056411 | 10046358 | 388358.4 | 499803.4 | 480280.9 | 506400.4 | 369861.5 | 21526790 | 471650.3 | 9000851  |
| 5644224  | 3794845  | 202423.5 | 173818.7 | 88973.67 | 141755.6 | 38584.15 | 8951514  | 847285.3 | 2378188  |
| 1257671  | 638735.2 | 368530   | 474200.7 | 358059.6 | 173525.1 | 327997.9 | 1221859  | 443734   | 854052.4 |
| 1679966  | 1152138  | 0        | 2653.295 | 21022.9  | 12476.67 | 0        | 3379399  | 1075020  | 2052075  |
| 612149.7 | 556928.2 | 2999333  | 1853864  | 6302835  | 1772042  | 3114443  | 1564081  | 279076.9 | 644875.5 |
| 3240961  | 860822.2 | 436032.6 | 579054   | 530036   | 3068368  | 2488536  | 2831157  | 3700121  | 3523386  |

|          |          |          |          |          |          |          |          |          |          |
|----------|----------|----------|----------|----------|----------|----------|----------|----------|----------|
| 19148373 | 13159889 | 104897.6 | 129964.7 | 105118.1 | 11375.89 | 19664.95 | 23809691 | 1633325  | 11036279 |
| 15958485 | 10951185 | 91172.12 | 127150.9 | 105697.4 | 105526.9 | 29000.28 | 25906515 | 652223.4 | 8712776  |
| 700547   | 77074.17 | 824168   | 860032.9 | 900511.1 | 919094.3 | 691622   | 667478.1 | 596794.5 | 684754.3 |
| 32816.7  | 33926.73 | 826204.2 | 2489318  | 1553499  | 1577097  | 131082   | 59783.66 | 4225.213 | 0        |
| 3457087  | 816740.9 | 710272.5 | 881784.1 | 784355.3 | 3472949  | 2484270  | 3229443  | 2296864  | 3289563  |
| 440891.4 | 77678.09 | 1013976  | 1170008  | 1068105  | 691951.4 | 428994.6 | 484540.5 | 494924.6 | 448268.7 |
| 3768459  | 2518132  | 104260.1 | 116307   | 140445.1 | 180263.2 | 108956.4 | 5469697  | 416159.3 | 2095342  |
| 3405786  | 2203828  | 268478.9 | 286671.5 | 274049.2 | 196223.2 | 94711.71 | 4160616  | 528067.1 | 1806386  |
| 7538679  | 5173006  | 21928.98 | 27846.19 | 22752.75 | 93994.34 | 172715.9 | 7622048  | 1079047  | 3850470  |
| 5061682  | 3300663  | 236964.9 | 331098.4 | 295753.9 | 349931   | 262401.2 | 7574238  | 384361.9 | 2885817  |
| 1074824  | 721761.9 | 5765.031 | 11584.95 | 93175.64 | 52269.5  | 6122.682 | 1334669  | 54623.62 | 748866.4 |
| 2087281  | 1425711  | 20106.41 | 23886.2  | 47705.7  | 27609.34 | 26433.22 | 3378230  | 202206.8 | 1360643  |
| 710659.6 | 364981.3 | 84172.27 | 66398.78 | 164108   | 303849   | 386878.2 | 782731.2 | 648280   | 442579.7 |
| 48891094 | 33707295 | 113595   | 135595.5 | 133633.9 | 614053.6 | 287392.9 | 67029970 | 2903524  | 26265250 |
| 2.52E+08 | 1.67E+08 | 37915465 | 21396859 | 152052.1 | 338090.9 | 618770.6 | 2.59E+08 | 29157368 | 1.6E+08  |
| 9681713  | 6676710  | 24965.53 | 40723.59 | 51620.36 | 110852.2 | 46898.02 | 11759275 | 1224009  | 5429807  |
| 4597814  | 3160850  | 6270.225 | 7954.671 | 4027.905 | 12886.49 | 176876.5 | 7153944  | 169758.3 | 2355077  |
| 88400.47 | 74324.62 | 348251   | 386195.7 | 867263.4 | 524879.5 | 162831.5 | 126730.8 | 0        | 18623.63 |
| 1348938  | 890762.1 | 4980.029 | 13829    | 42011.72 | 139592.1 | 142867.6 | 1934577  | 145931.2 | 644878   |
| 1459548  | 930363.8 | 5168.906 | 4674.939 | 0        | 256989.6 | 438414.6 | 2409044  | 303001.5 | 889686.1 |
| 128702.1 | 84985.48 | 614389.7 | 302235.7 | 752247.4 | 1698282  | 1036510  | 259187.8 | 75756.7  | 49247.69 |
| 149557.1 | 100398.1 | 514853.2 | 230476.7 | 771869.2 | 1297286  | 696779.5 | 291503   | 36811.87 | 91569.83 |
| 510402.9 | 353787.9 | 0        | 0        | 3403.558 | 0        | 5818.358 | 1010023  | 17319.51 | 435663.4 |
| 442644.7 | 98608.77 | 146248.1 | 228545.4 | 198696.9 | 366569.9 | 407926.6 | 539608.6 | 398094.6 | 339169.3 |
| 706869   | 338691.7 | 5028.848 | 0        | 4655.017 | 481901.7 | 514887.1 | 684407.9 | 418861.2 | 488385.7 |
| 264817.1 | 162605.4 | 0        | 0        | 5618.85  | 34659.31 | 156279.1 | 297577.6 | 92656.09 | 434457.1 |
| 2614810  | 1755050  | 84992.36 | 103371.8 | 103065   | 87526.23 | 112784.9 | 3224413  | 196679.3 | 1404204  |
| 1305619  | 242144.2 | 4672241  | 5862360  | 3775684  | 2960144  | 1364081  | 1286947  | 1567065  | 1301915  |
| 403635.2 | 271389.3 | 21746.63 | 25940.61 | 9131.348 | 0        | 20286.8  | 568501.8 | 35484.99 | 191618.1 |
| 4342.273 | 6412.727 | 122020.1 | 91313.96 | 56865.82 | 73769.99 | 0        | 0        | 7458.826 | 0        |
| 7.47E+08 | 5.22E+08 | 69435.8  | 112456.6 | 96265.06 | 124294.1 | 45728.4  | 9.64E+08 | 30413449 | 3.78E+08 |
| 1368329  | 573505.4 | 278297.6 | 377211.8 | 522414.5 | 671092.9 | 1016384  | 727150.1 | 2005617  | 1932772  |
| 455421.5 | 317321.7 | 4256.733 | 0        | 0        | 5410.776 | 0        | 591166.1 | 42479.28 | 254640.1 |
| 4779126  | 3195858  | 90002.45 | 135004.4 | 139871.9 | 390150.5 | 327517   | 6724452  | 207616.9 | 2618068  |
| 411376.1 | 286476.7 | 0        | 0        | 0        | 0        | 10978.62 | 607772.3 | 0        | 222112.8 |
| 7889366  | 5316722  | 123034.4 | 123618.1 | 144105.7 | 760815   | 382053   | 5341227  | 805231.9 | 7044047  |
| 54714.44 | 37955.39 | 0        | 2852.365 | 0        | 0        | 0        | 47173.72 | 0        | 47029.73 |
| 16747695 | 10350079 | 77116.74 | 109108.3 | 121602.6 | 3961249  | 7679513  | 31254850 | 6806062  | 11408920 |
| 3780401  | 2636523  | 35558.04 | 15369.96 | 2844.137 | 27250.87 | 8543.773 | 5674426  | 55233.1  | 1995702  |
| 838034.9 | 564104.9 | 19615.31 | 27031.34 | 14937.26 | 32890.78 | 74400.43 | 1266307  | 94886.01 | 468380.9 |
| 13514.82 | 19285.05 | 70886.86 | 129820.5 | 219590   | 79380.85 | 46581.4  | 12993.77 | 0        | 0        |
| 1408014  | 865489.1 | 21767.7  | 45396.34 | 11721.71 | 197372.5 | 783786.5 | 2267126  | 506680.4 | 990981.2 |
| 49628.87 | 21491.19 | 173344.4 | 131613.4 | 149050.1 | 103822.3 | 40945.61 | 26864.71 | 76145.99 | 43112.37 |
| 2391891  | 1465841  | 98828.91 | 67089.89 | 128808   | 763369.1 | 635268.8 | 2448930  | 248057   | 1861953  |
| 2312985  | 1580595  | 72895.23 | 85738.99 | 93243.98 | 42437.92 | 21161.34 | 2507791  | 255057.2 | 1190114  |
| 5549956  | 3889500  | 3379.37  | 7949.763 | 32957.67 | 8329.276 | 14434.75 | 10997420 | 345507.9 | 4451951  |
| 2225718  | 1463541  | 102867.6 | 155074.4 | 147517   | 190841.7 | 120454.6 | 2475749  | 108349.4 | 1504378  |



|          |          |          |          |          |          |          |          |          |          |
|----------|----------|----------|----------|----------|----------|----------|----------|----------|----------|
| 889636.9 | 582138.1 | 69675.29 | 61961.58 | 42400.11 | 82820.3  | 52402.95 | 1111615  | 87614.03 | 499866.6 |
| 2329905  | 1459623  | 174477.3 | 205585.1 | 245767.4 | 336073.9 | 321875.3 | 2997954  | 346126.5 | 1334080  |
| 4881126  | 3413066  | 24287.05 | 54187.95 | 12268.41 | 37206.55 | 26050.76 | 4765544  | 731232.6 | 2578897  |
| 101166.1 | 98830.5  | 606261.6 | 558881.5 | 1357648  | 1801098  | 414091.1 | 242594.7 | 19567.2  | 18240.26 |
| 41065.73 | 29379.12 | 242650.8 | 131381.7 | 199968.4 | 89693.66 | 61286.28 | 11903.71 | 8272.163 | 49374.93 |
| 16390048 | 10823154 | 269294.9 | 375358.4 | 384629.4 | 890106.3 | 3722887  | 29984995 | 25548713 | 4843452  |
| 13087356 | 8945898  | 166000.9 | 168974.5 | 244022   | 473034.5 | 910560.5 | 16155923 | 1008712  | 6878032  |
| 9914.726 | 10546.89 | 59392.5  | 160585.5 | 172504.4 | 301410.9 | 60357.83 | 0        | 21313.9  | 7692.954 |
| 187272.3 | 129953.4 | 0        | 0        | 3623.2   | 10993.61 | 0        | 214744.3 | 18643.65 | 89720.5  |
| 1466617  | 780094.9 | 379379.2 | 61357.48 | 206636.7 | 801030   | 519695.6 | 2389953  | 1252932  | 497658.7 |
| 1777006  | 1039718  | 83585.05 | 77868.33 | 182902.8 | 1256044  | 144303.8 | 2836727  | 336693.1 | 1190677  |
| 875281.2 | 617595.8 | 0        | 2873.611 | 3111.393 | 0        | 0        | 1436764  | 51192.39 | 433175.1 |
| 319569.3 | 200280.6 | 13497.43 | 11407.33 | 21727.29 | 25009.95 | 143642.6 | 485582.7 | 53178.18 | 205238.3 |
| 598715.8 | 212081.4 | 5641802  | 3137328  | 6143204  | 2093936  | 1216874  | 786122.1 | 836415.6 | 476551.6 |
| 47339.64 | 31974.78 | 108729.8 | 176093.1 | 234049.2 | 450083.4 | 176612.9 | 93168.39 | 54159.39 | 20631.52 |
| 482746.7 | 186205.8 | 2948.041 | 3397.825 | 13190.73 | 370445.6 | 413167.6 | 420149   | 207428.9 | 487011.8 |
| 1899631  | 911635.9 | 280897.8 | 364654.2 | 431886.6 | 1192121  | 995493   | 825472.4 | 2602969  | 2803300  |
| 1158160  | 569848.8 | 1646446  | 2309036  | 1851888  | 2261306  | 1656132  | 968518.6 | 1806215  | 1703770  |
| 1.64E+08 | 1.16E+08 | 111689.8 | 143444.7 | 134815.2 | 552889   | 182131.8 | 2.19E+08 | 10269623 | 80864726 |
| 11411694 | 7892660  | 180264   | 215224.3 | 212484.8 | 519466.4 | 270573.8 | 8049550  | 1828977  | 8434813  |
| 876715.3 | 621396.8 | 0        | 0        | 0        | 3288.463 | 3364.419 | 1471365  | 19679.62 | 442053.3 |
| 2543025  | 1589717  | 0        | 5283.628 | 23133.47 | 570509.1 | 1233488  | 4126990  | 1055369  | 1634298  |
| 20869.46 | 21729.96 | 170528.2 | 123970   | 430863.9 | 470649.4 | 118432.1 | 38129.66 | 0        | 0        |
| 707082.9 | 442347   | 98477.56 | 153880.3 | 94124.73 | 61180.55 | 33071.81 | 1006908  | 70700.95 | 414346.5 |
| 1617536  | 992223.6 | 266227.1 | 259173.7 | 257326.6 | 269604.4 | 84905.63 | 2382910  | 211404.4 | 936314.6 |
| 3920887  | 2761116  | 23065.14 | 24204.46 | 27742.63 | 117604.2 | 23116.21 | 6583511  | 349049   | 1734361  |
| 37015127 | 25048132 | 1773098  | 2329188  | 1984020  | 2280037  | 886122.4 | 48619032 | 1599747  | 22626428 |
| 475549.4 | 322857.1 | 0        | 12237.48 | 28858.33 | 81258.67 | 0        | 863359.6 | 51016.39 | 299248.3 |
| 306315.9 | 216816.2 | 2927.557 | 0        | 7789.058 | 0        | 0        | 537233.2 | 30377.31 | 203362.5 |
| 1.75E+08 | 1.22E+08 | 2847963  | 3759600  | 3693250  | 3324523  | 1849206  | 2.27E+08 | 6444540  | 88186766 |
| 3596012  | 2509175  | 57877.37 | 65154.89 | 34732.29 | 203983.7 | 41762.44 | 3360297  | 570856.4 | 2405231  |
| 10059113 | 7055011  | 134909.7 | 184224.2 | 170663.8 | 337538.3 | 38996.11 | 16682724 | 367062.6 | 5320783  |
| 581045.2 | 379507.9 | 0        | 0        | 0        | 84015.54 | 211144.3 | 838544.1 | 215757.7 | 418842.1 |
| 597491.6 | 245852.2 | 2560032  | 2876040  | 1853262  | 1442164  | 561779.1 | 721335.8 | 800446.4 | 735461.1 |
| 1668240  | 245278.4 | 1139853  | 1317258  | 1376794  | 1583314  | 1178154  | 1843496  | 1351723  | 1455128  |
| 16458271 | 11681287 | 88522.14 | 82358.64 | 94683.55 | 219183   | 79894.03 | 24796794 | 845443.9 | 7809526  |
| 1353580  | 965133.4 | 0        | 0        | 0        | 3459.176 | 12303.89 | 2007379  | 49008.47 | 703946.8 |
| 2569446  | 1833396  | 0        | 0        | 0        | 11829.59 | 11358.79 | 3316866  | 37397.91 | 1294892  |
| 597771.1 | 422133.4 | 0        | 6878.337 | 7336.25  | 4964.08  | 17591.35 | 944393.8 | 14721.51 | 281851.6 |
| 396282.2 | 203257.1 | 70475.39 | 61613.57 | 72844.13 | 255836   | 142677.7 | 543562.7 | 70984.66 | 321161.4 |
| 962874.3 | 414420   | 152824.3 | 41536.23 | 291935.9 | 751939.6 | 619573.4 | 1011050  | 529252.2 | 558584.2 |
| 2695520  | 1866734  | 74626.31 | 108419.4 | 86569.44 | 111846.8 | 62185.47 | 3807577  | 268466.8 | 1191462  |
| 133491.3 | 107743.2 | 3060962  | 3597740  | 1375592  | 1853349  | 201432   | 134010.1 | 272376.6 | 42620.62 |
| 2674920  | 1915731  | 0        | 3389.836 | 0        | 0        | 0        | 3528374  | 55537.19 | 1286937  |
| 1103160  | 137788.3 | 5126173  | 5981620  | 4070792  | 2005884  | 1616934  | 1181442  | 1300056  | 975506.1 |
| 16702123 | 3241629  | 10707034 | 11733682 | 11799445 | 15234381 | 11965911 | 17570763 | 11810076 | 15766173 |
| 6393800  | 3666790  | 414379.8 | 511994   | 672799.6 | 3136988  | 2346289  | 2626394  | 10255778 | 10072972 |

|          |          |          |          |          |          |          |          |          |          |
|----------|----------|----------|----------|----------|----------|----------|----------|----------|----------|
| 4492535  | 3193937  | 35796.68 | 31930.86 | 31587.97 | 43490.37 | 65062.41 | 7063795  | 441753.7 | 2323609  |
| 459287.5 | 219134.9 | 5293.147 | 3356.818 | 0        | 3050.308 | 508674.2 | 632405   | 264416.8 | 180450.7 |
| 4012663  | 2812539  | 96735.29 | 130277.7 | 85812.24 | 107255.1 | 58165.48 | 3452360  | 553383.7 | 2423691  |
| 299957.6 | 208060.7 | 3165.139 | 3160.721 | 11184.53 | 0        | 37446.36 | 325536.7 | 0        | 244252.9 |
| 238162.3 | 168797.1 | 0        | 8853.781 | 3413.225 | 4244.044 | 0        | 433395.2 | 5864.349 | 131914   |
| 318541.2 | 183744.9 | 8568.692 | 0        | 3509.577 | 0        | 288934.3 | 523149.2 | 57060.02 | 382310.4 |
| 135222.3 | 93351.71 | 0        | 2875.853 | 0        | 28115.15 | 0        | 145840   | 13110.47 | 99203.45 |
| 1130193  | 709588.5 | 282648.1 | 61044.87 | 95639.29 | 197208.7 | 108964.1 | 1939820  | 239063.9 | 784152.4 |
| 528495.1 | 70084.28 | 442279.3 | 457152.2 | 497624.1 | 356031.5 | 357109.1 | 526387.5 | 481974.7 | 458318.2 |
| 6581251  | 4327190  | 504406.8 | 722321   | 699390.5 | 638776.4 | 288972.3 | 8239221  | 453143.9 | 3881643  |
| 280785.3 | 96422.36 | 438852.8 | 532904   | 447338.9 | 377597.7 | 318597   | 356110   | 321765.3 | 173165.5 |
| 3299004  | 1261963  | 603165.1 | 361452.1 | 918032.7 | 3657549  | 181263   | 4925712  | 3272273  | 1456624  |
| 233454.1 | 218581.1 | 1259950  | 732010.2 | 2653354  | 731467.3 | 1161644  | 620209.9 | 85486.43 | 153136.7 |
| 39445063 | 28179818 | 106042.1 | 124890.4 | 127920.3 | 706268.2 | 490942.1 | 66458805 | 1931443  | 17230131 |
| 2835592  | 1776432  | 297673   | 390597.9 | 392940.4 | 431659.6 | 337305.1 | 4080526  | 442433   | 1480268  |
| 2.54E+08 | 1.72E+08 | 65605492 | 17207326 | 696566.9 | 163802.5 | 1520347  | 5.06E+08 | 1.66E+08 | 47408982 |
| 168713.1 | 56542.98 | 299777.7 | 196236.1 | 652688.6 | 781159.8 | 602129.8 | 208690   | 79277.06 | 159749.7 |
| 429714.3 | 303582.7 | 6955.184 | 3607.841 | 0        | 6453.635 | 27390.78 | 570086.2 | 775541.1 | 42630.36 |
| 33262144 | 23904541 | 106776.8 | 122699.1 | 103145   | 169251.2 | 60240.9  | 35147558 | 1437326  | 17815887 |
| 12177681 | 8689762  | 215772.6 | 195641   | 128867.1 | 81358.25 | 42899.84 | 13444222 | 1371411  | 9537624  |
| 92060.64 | 64328.48 | 0        | 0        | 0        | 8552.336 | 6937.519 | 99814.66 | 17138.69 | 84428.02 |
| 1398005  | 873048.4 | 164684.7 | 183302.3 | 209207   | 201333   | 185691   | 2567597  | 263241.9 | 1227870  |
| 436775.1 | 257887.9 | 96137.92 | 136173.2 | 83262.82 | 72128.37 | 26174.48 | 722672.8 | 44229.6  | 345934.5 |
| 115590.6 | 84078.7  | 337101.8 | 149622.3 | 795217.1 | 755550.8 | 415725.1 | 255447.7 | 27579.45 | 93067.47 |
| 9029866  | 6324232  | 333190.2 | 326467.3 | 298315.6 | 239206.2 | 232411.2 | 8514024  | 1315424  | 4874956  |
| 266029   | 159796.9 | 88223.77 | 82307.79 | 44863.2  | 21753.33 | 6544.519 | 379093.1 | 22754.87 | 182331.6 |
| 590439   | 422141.9 | 2216.738 | 0        | 3144.799 | 28468.95 | 4368.455 | 543070.9 | 55952.52 | 328379.6 |
| 756512.4 | 524990.1 | 33604.23 | 54299.1  | 25098.34 | 29215.55 | 16344.3  | 1056701  | 80868.12 | 329024.9 |
| 363682.4 | 178726.4 | 12237.83 | 9087.942 | 15938.56 | 148113.5 | 338266.2 | 366370.9 | 243534   | 208849   |
| 7876041  | 5468626  | 380103.1 | 570794.1 | 449327.1 | 157090.1 | 116848.5 | 9352894  | 570045.6 | 3909100  |
| 323533.1 | 210060.8 | 8980.513 | 16860.35 | 0        | 88958.42 | 71890.36 | 392522   | 37890.5  | 192063.7 |
| 805522.9 | 579771.8 | 12160.52 | 6911.59  | 0        | 11040.5  | 0        | 1218370  | 49297.4  | 480322   |
| 8403276  | 6092652  | 5569.38  | 15956.47 | 0        | 35213.62 | 11873.91 | 15078306 | 350277.7 | 4504411  |
| 664602.2 | 481920.5 | 0        | 0        | 0        | 5190.284 | 0        | 1142102  | 9191.264 | 393378   |
| 50248548 | 36395569 | 132131.5 | 170729   | 170963   | 206405.3 | 84796.98 | 66467874 | 972778.2 | 27336838 |
| 38283.39 | 22271.87 | 2226.25  | 10390.26 | 11051.25 | 0        | 18341.29 | 74513.72 | 13682.46 | 37150.73 |
| 2254067  | 1533464  | 15488.83 | 3959.571 | 35660.34 | 329605.3 | 395446.2 | 1645539  | 2142362  | 1475485  |
| 997850.8 | 705233.2 | 45050.94 | 21345.51 | 8170.919 | 66391.96 | 0        | 1956751  | 43709.29 | 721544.6 |
| 4209531  | 2856699  | 319310.5 | 378860.9 | 317423.3 | 307150.4 | 86384.73 | 4140940  | 578364.4 | 2487764  |
| 118562   | 86216.45 | 0        | 0        | 0        | 0        | 0        | 146834.4 | 0        | 63344.22 |
| 1206568  | 856722.2 | 5365.408 | 0        | 0        | 0        | 153266.7 | 1523518  | 39952.92 | 586226.3 |
| 2395508  | 1475059  | 341895.1 | 429686.9 | 394389.4 | 391383.6 | 288529.1 | 3319988  | 345655.6 | 1452801  |
| 508390.6 | 357019.6 | 14614.1  | 22832.85 | 16182.79 | 22868.5  | 12650.08 | 662987.6 | 28756.71 | 243123.2 |
| 150480.5 | 78312.23 | 3889.135 | 0        | 21709.26 | 35314.63 | 139891.3 | 144628   | 36168.05 | 134981.8 |
| 4797637  | 3423790  | 144995.4 | 129857.8 | 131487.2 | 68928.84 | 9243.886 | 3343246  | 873726.7 | 3044321  |
| 198068.3 | 108027.9 | 0        | 0        | 0        | 99077.08 | 149134.7 | 151292.2 | 144627.3 | 163948.2 |
| 567369.3 | 321304.8 | 13778.48 | 7739.562 | 30208.88 | 189008.3 | 427965.2 | 612102.2 | 25550.69 | 586931.5 |

|          |          |          |          |          |          |          |          |          |          |
|----------|----------|----------|----------|----------|----------|----------|----------|----------|----------|
| 479873.4 | 344346.5 | 0        | 7851.833 | 20088.17 | 9108.195 | 0        | 789706.7 | 14704.35 | 241579.8 |
| 12613.76 | 13519.48 | 121455.9 | 153803.5 | 350656.7 | 247884.5 | 29216.35 | 21690.01 | 0        | 0        |
| 2753086  | 1701279  | 132649   | 105295.1 | 230546.4 | 874680.9 | 968764.2 | 3839961  | 392193   | 1488949  |
| 184950.4 | 129076   | 0        | 11861.34 | 8985.596 | 14644.25 | 5723.642 | 343154.9 | 11719.22 | 103994.9 |
| 949727.6 | 635896.3 | 47221.62 | 33807.42 | 30871.96 | 10265.83 | 337413.7 | 1252955  | 99477.97 | 500151.2 |
| 7179002  | 5183076  | 52041.76 | 59278.46 | 63616.44 | 167329   | 97518.67 | 8704445  | 939366.4 | 3348565  |
| 245690.1 | 144228.5 | 527167.3 | 302342.8 | 766925.9 | 775826.7 | 365827.2 | 436004.5 | 140822.4 | 139158   |
| 173228.4 | 122936.2 | 5351.903 | 7966.341 | 0        | 0        | 12997.91 | 301345.8 | 0        | 95495.35 |
| 275730.8 | 199577.7 | 5033.337 | 3423.386 | 6282.38  | 0        | 0        | 313404.6 | 22884.01 | 118654.6 |
| 447712.7 | 328229.1 | 2414301  | 1417397  | 5187874  | 1435402  | 2223873  | 975426.1 | 166122.9 | 553212   |
| 782962   | 496463.9 | 117662.3 | 104625.1 | 57771.3  | 110905.3 | 139364.3 | 1103801  | 53459.77 | 486671.7 |
| 193500.4 | 128937.7 | 17876.47 | 30827    | 29053.36 | 7423.17  | 4901.646 | 252695.9 | 11858.27 | 139874.7 |
| 9429556  | 6793628  | 28841.83 | 23331.42 | 51151.54 | 397752.5 | 306478.3 | 11844243 | 464076.7 | 4463814  |
| 328627.7 | 318179.8 | 1536541  | 925959.2 | 3329971  | 855203.8 | 1649912  | 890009.4 | 98608.67 | 204457.1 |
| 1143200  | 836215.3 | 2693.465 | 0        | 0        | 3799.654 | 5246.198 | 1454326  | 3781.474 | 549401.4 |
| 141998.2 | 99357.38 | 3853.481 | 0        | 3797.128 | 7342.359 | 18713.6  | 167326   | 7014.592 | 107175.8 |
| 31337639 | 19276598 | 1216248  | 1742691  | 2732695  | 12752954 | 9429824  | 10065870 | 53591133 | 43865651 |
| 8129905  | 3571442  | 104183.3 | 73157.62 | 8578868  | 1315132  | 2718531  | 10501239 | 3858100  | 9284127  |
| 2271169  | 1537362  | 222640.7 | 272329.7 | 247443.2 | 90098.93 | 67097.76 | 2507068  | 247422.3 | 1188545  |
| 6387000  | 4608001  | 107464.2 | 110886   | 92684.63 | 141732.5 | 115802.6 | 4719220  | 921284.3 | 4057081  |
| 784838.9 | 410788.9 | 256152.6 | 281283.3 | 424707.9 | 96964.65 | 134643.8 | 201635.5 | 752374.3 | 1267775  |
| 2545839  | 1757634  | 193958.2 | 238163.6 | 183957   | 96175.78 | 66778.57 | 1550529  | 595217   | 1880593  |
| 5589647  | 4061346  | 68928.95 | 75798.4  | 57060.78 | 123402.9 | 42128.05 | 6668543  | 252649   | 2667941  |
| 7202.604 | 6998.22  | 100527.8 | 101004   | 252999.3 | 146639.7 | 17426.2  | 12720.33 | 0        | 0        |
| 2996659  | 2147702  | 127506.9 | 130680.3 | 88098.51 | 38229.77 | 29602.47 | 2520806  | 404775.3 | 1658494  |
| 1214000  | 756875.2 | 105299.8 | 56673.96 | 128009   | 237706.7 | 485814.5 | 1273049  | 203990.2 | 779467.2 |
| 41318102 | 30369115 | 95737.34 | 128079.9 | 113302.3 | 144051   | 131108.6 | 48804494 | 985638.1 | 20037353 |
| 854880.4 | 608550.3 | 0        | 0        | 12013.85 | 45599.98 | 98030.14 | 1246777  | 145186.4 | 655637.9 |
| 8903.098 | 9217.327 | 76820.02 | 34597.94 | 105995   | 83601.19 | 8041.58  | 15790.43 | 0        | 0        |
| 1206654  | 788509.7 | 90394.11 | 71919.68 | 140964   | 199750   | 196483   | 904088.1 | 239189.7 | 905610.2 |
| 11220763 | 8233646  | 39696.42 | 72648.01 | 43299.94 | 99744    | 65358.99 | 20751733 | 890701.9 | 4492296  |
| 6311707  | 4607687  | 21969.07 | 19114.97 | 78301.34 | 140731.1 | 83486.11 | 9309738  | 851809.7 | 4152347  |
| 5951290  | 11714328 | 30143229 | 36335953 | 14485216 | 17854183 | 15654210 | 173865.9 | 26822346 | 95376.56 |
| 422155.9 | 186575.1 | 3527990  | 4399831  | 2963349  | 1243837  | 621189.3 | 553058.4 | 652964.8 | 347661.6 |
| 1869055  | 1195079  | 319792.7 | 351540.5 | 296416.6 | 197096.3 | 106178.5 | 2617304  | 239085.8 | 1056890  |
| 212758.1 | 118215.2 | 264355.1 | 388739.3 | 307606.1 | 587667.9 | 540567.8 | 182139.7 | 147073.7 | 116644   |
| 351000.1 | 257386   | 2339.001 | 0        | 3247.639 | 0        | 8199.45  | 518892.3 | 19231.98 | 181864.4 |
| 7354348  | 5311418  | 158412.6 | 180152   | 178592.7 | 259331.5 | 68518.39 | 9435636  | 187227.5 | 3370277  |
| 513941.8 | 277282.1 | 0        | 0        | 13550.56 | 394835.3 | 270549.1 | 535239   | 342197.5 | 309368.7 |
| 164199.7 | 119844.9 | 7125.136 | 3682.347 | 0        | 0        | 0        | 264711.9 | 4942.018 | 75644.36 |
| 7351303  | 5048782  | 519756.2 | 662248.6 | 603101.4 | 596017.7 | 277572.5 | 11557882 | 327171.4 | 3692713  |
| 43407338 | 29740621 | 3167689  | 3853026  | 3558389  | 3525048  | 2068178  | 60823279 | 1431045  | 23021977 |
| 3370374  | 2086391  | 177195.4 | 332905.5 | 310152.7 | 1158319  | 970679.4 | 792407.1 | 4895225  | 5545007  |
| 1014349  | 725314.5 | 8557.421 | 5517.731 | 0        | 17642.76 | 156241.3 | 1309794  | 150409   | 762499.3 |
| 86194107 | 63731709 | 84755.8  | 80378.23 | 106565.5 | 179992.4 | 110571.1 | 1.13E+08 | 2606160  | 38000414 |
| 21715.77 | 19402.69 | 71852.91 | 39760.25 | 184218.8 | 127224.4 | 66486.08 | 0        | 5805.334 | 30180.82 |
| 16335099 | 10288389 | 756773.5 | 1030489  | 1507490  | 4839737  | 4948179  | 5283591  | 21736789 | 29024394 |

|          |          |          |          |          |          |          |          |          |          |
|----------|----------|----------|----------|----------|----------|----------|----------|----------|----------|
| 1396000  | 761047.6 | 288106.7 | 197706.1 | 314532.5 | 118899.8 | 1040619  | 2523483  | 786316.7 | 630101.2 |
| 3786458  | 2591789  | 265308   | 387340   | 320139.9 | 302269.5 | 166691.7 | 4073282  | 249338.3 | 2207261  |
| 220879.9 | 163630.2 | 0        | 0        | 0        | 0        | 0        | 469108.8 | 9414.585 | 197908.4 |
| 2225640  | 1551797  | 72920.32 | 80963.15 | 92387.51 | 237109.8 | 180092.5 | 2396748  | 241876.9 | 1179917  |
| 477935.4 | 287028.7 | 90774.96 | 107495.2 | 92589.84 | 104577.2 | 60489.54 | 647679.6 | 67910.28 | 283431.8 |
| 92073.79 | 65961.66 | 3385.521 | 0        | 0        | 13124.73 | 0        | 47512.15 | 4148.556 | 110735.3 |
| 2051004  | 1504481  | 4200.7   | 0        | 6171.308 | 69867.11 | 27188.8  | 2340085  | 94015.55 | 966160.9 |
| 3150348  | 2212132  | 82554.62 | 35310.42 | 86080.05 | 400338.9 | 258080.3 | 4400412  | 154200   | 1614928  |
| 1656617  | 1095595  | 128978   | 125372.3 | 140890   | 320890.1 | 196830.7 | 1852236  | 161587.8 | 1020944  |
| 5086172  | 3658647  | 194998.4 | 158491.1 | 171902.2 | 219767.4 | 29917.76 | 3914198  | 789598.4 | 3061174  |
| 5305152  | 3720139  | 313280.8 | 385810.8 | 363056.3 | 291978.1 | 106152.7 | 8941067  | 542077.3 | 2119400  |
| 3115000  | 2187804  | 33543.95 | 60011.78 | 709194.4 | 64408.85 | 58665.27 | 4289758  | 468715.1 | 1608607  |
| 2070878  | 1156733  | 426645.9 | 568322.8 | 525932.3 | 615219.1 | 439962.5 | 3500741  | 443877.3 | 1848258  |
| 2314370  | 950955.8 | 395794.4 | 614251.5 | 660295.8 | 2159556  | 1130623  | 2328473  | 932090.8 | 1938701  |
| 8365280  | 5034344  | 93155.3  | 46300.13 | 233795.9 | 819332.7 | 6985772  | 11979871 | 1587281  | 5367195  |
| 2423074  | 1653402  | 189207.4 | 257600.6 | 167735.6 | 314973.5 | 72879.98 | 3443945  | 121424.8 | 1586161  |
| 1944678  | 1181454  | 0        | 0        | 210380.1 | 603653.7 | 1169499  | 1806049  | 1039575  | 3880988  |
| 283103.5 | 179044.1 | 0        | 0        | 5659.429 | 64796.27 | 172260.8 | 268665.7 | 141041.5 | 566984.7 |
| 1235843  | 869148.1 | 76611.56 | 78308.89 | 64377.1  | 72103.42 | 48846.64 | 1944873  | 104355.4 | 507895.2 |
| 175268   | 33104.33 | 1163510  | 1591155  | 1046532  | 544229.6 | 194155.1 | 126415   | 215431.7 | 165198.3 |
| 1340933  | 892120.5 | 0        | 0        | 11625.56 | 172078.6 | 663791   | 1983609  | 497963.4 | 765855   |
| 1855028  | 1015970  | 465366.6 | 529856.5 | 591819.8 | 426449   | 456474.7 | 1390006  | 658842.1 | 1398469  |
| 1812366  | 1336609  | 40916.75 | 34399.86 | 20730.72 | 0        | 0        | 3273617  | 67879.82 | 917642.3 |
| 8257998  | 5943237  | 296892.6 | 374795.2 | 324735.5 | 271963.3 | 159021.2 | 9861263  | 425403.2 | 3886924  |
| 44921.79 | 37052.39 | 120622.6 | 45797.67 | 180780.6 | 242353.9 | 119748.5 | 54450.5  | 12136.82 | 25880.99 |
| 1850529  | 1308927  | 80777.67 | 130288.5 | 100542.5 | 142571.5 | 35711.46 | 2585110  | 32285.15 | 911808.1 |
| 635741.2 | 397716.5 | 113061.2 | 98002.91 | 101629.2 | 124904.6 | 79396.69 | 811599.6 | 118623.9 | 305633.6 |
| 397311   | 237476.2 | 2378.741 | 0        | 0        | 163346.7 | 261961.7 | 385676.4 | 136786.5 | 231999.7 |
| 1597413  | 394369.8 | 1331372  | 1329655  | 789168.4 | 1021104  | 863154.8 | 2132305  | 1884344  | 1190613  |
| 571960.4 | 426094.1 | 0        | 0        | 0        | 4097.269 | 4056.184 | 783806.8 | 0        | 244794.8 |
| 1129013  | 737578.3 | 0        | 0        | 0        | 0        | 814121.9 | 1995269  | 133705.7 | 661714   |
| 96272.91 | 48287.66 | 203592.5 | 280236.6 | 245165.3 | 435533.6 | 105188.6 | 120174.9 | 89035.57 | 56348.2  |
| 411191.5 | 130931.5 | 2578972  | 2756699  | 1876931  | 927043.8 | 509142.6 | 321109.6 | 608309   | 434812.5 |
| 2172678  | 287466.2 | 6925155  | 9226337  | 5964489  | 3766337  | 2528762  | 2162693  | 2262893  | 1895368  |
| 824942   | 570686.9 | 117561.1 | 107802.6 | 70200.72 | 26303.16 | 0        | 924595.5 | 85440.52 | 440675.5 |
| 172991.8 | 102495.5 | 26287.71 | 9349.315 | 23634.42 | 38143.88 | 99119.56 | 181788.3 | 73492.1  | 136212.3 |
| 6822081  | 5068479  | 43454.54 | 24304.09 | 68737.77 | 115396.7 | 34233.04 | 6722634  | 439559.9 | 3336132  |
| 8680646  | 6386877  | 86823.31 | 127789.9 | 114051.7 | 359469   | 108668.5 | 12134700 | 846190.1 | 3466812  |
| 1373392  | 935300.2 | 116775.5 | 154394.7 | 147535.1 | 152833.3 | 62403.36 | 2130014  | 65791.21 | 726362   |
| 165207.4 | 78969.1  | 0        | 5481.584 | 2514.669 | 0        | 189547.3 | 166006.4 | 29239.29 | 194919.6 |
| 2210400  | 1656998  | 0        | 0        | 0        | 11319.97 | 5551.454 | 4048112  | 3847712  | 476677.1 |
| 23836641 | 17726706 | 138997.2 | 190621   | 151020.8 | 308096.2 | 359970.2 | 25782551 | 933422.8 | 11139442 |
| 43277.7  | 41292.49 | 370551.7 | 1064484  | 560521.8 | 392733   | 134120.3 | 35235.77 | 30862.84 | 8780.159 |
| 45374.63 | 31794.73 | 293252.8 | 146927.2 | 398183.8 | 904505.3 | 380563.2 | 89600.02 | 11313.66 | 21267.75 |
| 2078377  | 601182.7 | 281146   | 407055.1 | 463114.5 | 1976261  | 1703404  | 2054456  | 1425400  | 1813494  |
| 257608.7 | 45437.85 | 201668.1 | 267560.4 | 137677   | 110935.8 | 135207.3 | 223084.8 | 239174.9 | 252375.4 |
| 6582859  | 4859216  | 95047.6  | 126843.7 | 105230.8 | 72829.65 | 175481.8 | 11918157 | 229200.5 | 3326799  |

|          |          |          |          |          |          |          |          |          |          |
|----------|----------|----------|----------|----------|----------|----------|----------|----------|----------|
| 852051.7 | 418723.3 | 303686.8 | 399659.4 | 332746.7 | 187730   | 279227.3 | 1380021  | 327493.3 | 557543.2 |
| 2192898  | 1345172  | 376148.9 | 515456.4 | 429871.5 | 448397.5 | 264780.1 | 3091742  | 297750.7 | 1232575  |
| 499412.2 | 293352.3 | 150787.4 | 163664.8 | 162622.1 | 49569.64 | 45078    | 663676.6 | 60265.23 | 347016.9 |
| 18226715 | 13449184 | 315017.1 | 439330.7 | 393222.3 | 389481.7 | 224786.6 | 23398696 | 406306.8 | 7869247  |
| 102442.4 | 33496.56 | 197969.2 | 252590.9 | 162207.8 | 323494.5 | 109967.3 | 93529.77 | 93919.73 | 103220.2 |
| 82132.69 | 61806.79 | 0        | 0        | 0        | 0        | 0        | 166332   | 0        | 53568.43 |
| 1075384  | 589296.9 | 3026.971 | 11080.14 | 33354.41 | 3735.024 | 1118904  | 1829633  | 939755.4 | 457616.7 |
| 35619232 | 26661248 | 188073.6 | 242640.7 | 209365.6 | 253829.4 | 127324.9 | 43533617 | 848893   | 15164522 |
| 1369420  | 803575.3 | 337420.3 | 284908.7 | 341686.8 | 314478   | 237607.9 | 1061099  | 491312.7 | 925666.5 |
| 25400581 | 19029650 | 128619.1 | 156842.3 | 136945.6 | 159367.8 | 51798.81 | 44281709 | 406500.9 | 11416575 |
| 2030036  | 1313916  | 214507.8 | 193006.7 | 173595.3 | 397481.4 | 480627.8 | 1373528  | 451673.4 | 1589177  |
| 1886830  | 296601.5 | 1095696  | 1710287  | 1450756  | 1687710  | 1359079  | 2000643  | 1596410  | 1614941  |
| 4861745  | 3279466  | 729943.7 | 777858.1 | 347562.1 | 293423.3 | 434267.7 | 5304572  | 5474023  | 1489272  |
| 2564511  | 1924429  | 2933.439 | 6934.595 | 7396.087 | 12737.98 | 23533.07 | 5101123  | 90434.85 | 1428178  |
| 1895091  | 1145778  | 249577.8 | 253811   | 323686.9 | 779094.1 | 351477.1 | 1796320  | 410026.4 | 1258954  |
| 9731753  | 2777014  | 1731817  | 1905448  | 2509758  | 9472077  | 7757130  | 9697984  | 5836367  | 8466416  |
| 837489.4 | 410838.2 | 367550.4 | 333750.6 | 408377.9 | 218841.9 | 176033.7 | 1273856  | 227765.6 | 674720   |
| 485422.9 | 350669.5 | 11881.63 | 2822.934 | 22899.55 | 23736.14 | 41844.5  | 881093.4 | 61306.37 | 180830.7 |
| 4593224  | 3314075  | 294468.9 | 290414   | 271808.7 | 100290.5 | 45437.18 | 5600993  | 327559.9 | 2464355  |
| 45685.6  | 15775.37 | 2524394  | 2607508  | 1396628  | 861895   | 64683.93 | 53090.58 | 66775.41 | 46409.84 |
| 12845.82 | 10677.73 | 89404.8  | 106724.6 | 273454.6 | 528732.9 | 234985   | 17449.95 | 0        | 8548.5   |
| 172874.7 | 99806.51 | 45400.57 | 31611.93 | 38701.59 | 66176.78 | 26672.79 | 272522   | 37671.35 | 98262.84 |
| 92192.74 | 66171.55 | 0        | 0        | 0        | 8270.64  | 16479.7  | 184621.1 | 0        | 74657.46 |
| 663947   | 421687.1 | 89968.69 | 94240.16 | 138587.2 | 114777.8 | 93286.28 | 904666.8 | 90002.5  | 350808.4 |
| 174071.2 | 118947.9 | 0        | 0        | 0        | 32479.36 | 62679.61 | 150920   | 85996.63 | 372570.2 |
| 18074878 | 13589946 | 113923.6 | 142106.3 | 102357.3 | 51065.26 | 77900.27 | 18431712 | 1470431  | 8373446  |
| 480658.2 | 219977.7 | 0        | 0        | 23303.82 | 324228.9 | 426130   | 371460.7 | 265376.8 | 421758   |
| 22729.83 | 16963.23 | 169404.4 | 115000.5 | 320744.5 | 494817.5 | 106158.3 | 24641.99 | 5825.986 | 13820.11 |
| 1739440  | 1223819  | 105302.5 | 162277.9 | 98938.2  | 219132.1 | 31088.23 | 2740508  | 50340.33 | 955448.6 |
| 2370898  | 1697158  | 122930.9 | 137856.4 | 124366.4 | 139757.3 | 113646.5 | 3173616  | 120811.5 | 1111515  |
| 911139.7 | 685447.7 | 3538.305 | 8285.358 | 0        | 8212.633 | 6624.266 | 1306295  | 81642.11 | 569024.3 |
| 1540966  | 255522.8 | 734630.5 | 1073812  | 992477.7 | 1589940  | 1121226  | 1469665  | 1183021  | 1476384  |
| 17509.87 | 7827.978 | 222817.4 | 760803.9 | 386431.3 | 478516.4 | 37395.86 | 26743.99 | 11872.26 | 15904.43 |
| 488482   | 362525.6 | 7432.902 | 7068.17  | 5328.132 | 25548.12 | 5782.551 | 1028994  | 17973.77 | 412816.6 |
| 19176063 | 14434607 | 14728.09 | 6564.871 | 72806.15 | 334263.4 | 229691.7 | 25476560 | 459565.9 | 7970224  |
| 551186.8 | 416736.8 | 0        | 3154.317 | 0        | 3801.744 | 0        | 747038.4 | 4067.891 | 217898.4 |
| 1427857  | 1072309  | 9915.568 | 12779.88 | 6716.669 | 0        | 40864.32 | 1198368  | 153892.8 | 849367   |
| 168156.2 | 125934.1 | 772004.6 | 453400.5 | 1612220  | 418741.8 | 714523.9 | 373471.3 | 41913.48 | 187899.5 |
| 882659.7 | 653794.7 | 12114.69 | 27653.52 | 28591.73 | 18937.39 | 19431.78 | 904834.5 | 45963.87 | 500325.3 |
| 587904.9 | 445061.4 | 2386.888 | 0        | 0        | 7152.778 | 0        | 746302.1 | 0        | 241105.7 |
| 1352766  | 1024368  | 4726.391 | 8134.526 | 5424.854 | 0        | 7409.123 | 2894938  | 97327.19 | 991211.2 |
| 6239121  | 3985145  | 616715.3 | 505357.7 | 728509.1 | 1136170  | 2238457  | 5581040  | 1167058  | 4088605  |
| 1181805  | 815344.2 | 87104.43 | 153177.1 | 166028.5 | 118692.9 | 30686.06 | 1745887  | 53640.66 | 568944.9 |
| 902714.9 | 652745.8 | 81102.09 | 74797.25 | 54346.48 | 0        | 15561.09 | 1484142  | 48206.08 | 493103.6 |
| 145648.6 | 107206.5 | 2411.849 | 0        | 0        | 14709.93 | 7286.218 | 191334.7 | 12883.89 | 93324.74 |
| 147921.2 | 102982   | 30999.83 | 11966.74 | 10922.11 | 5133.45  | 6008.686 | 158526.8 | 3316.015 | 106589.2 |
| 2943800  | 742016.7 | 475401.8 | 526693.5 | 688255   | 2930069  | 2388872  | 2313613  | 2588517  | 3088559  |

|          |          |          |          |          |          |          |          |          |          |
|----------|----------|----------|----------|----------|----------|----------|----------|----------|----------|
| 8152409  | 5322875  | 386586.7 | 467962.2 | 599230.9 | 2951287  | 1815027  | 2582770  | 11604851 | 14836552 |
| 75183.96 | 46487.5  | 1170167  | 2818521  | 1461075  | 1032338  | 179978   | 86884.42 | 42610.54 | 44796.89 |
| 2381620  | 1448178  | 0        | 2580.921 | 3378.228 | 730763.8 | 1783938  | 2932165  | 1535308  | 3331379  |
| 4.01E+08 | 3.05E+08 | 101083.5 | 110674.8 | 102439.6 | 181934.6 | 87689.55 | 4.81E+08 | 9299208  | 1.7E+08  |
| 3745883  | 2542125  | 8314.515 | 10026.06 | 16837.65 | 466785   | 1894631  | 6302617  | 1287209  | 2483632  |
| 1747602  | 1241505  | 64140.9  | 66110.61 | 335572.5 | 68172.27 | 85710.75 | 1681849  | 183826.2 | 999393.1 |
| 4040484  | 3071706  | 14231.78 | 11657.84 | 16668.44 | 16894.16 | 0        | 8868356  | 358756.5 | 3116917  |
| 1312118  | 979285.4 | 37064.45 | 52502.41 | 48387.42 | 4825.517 | 0        | 1577109  | 73911.42 | 544221   |
| 378452.1 | 77079.26 | 473200.2 | 618745.1 | 636345.8 | 622619.1 | 354471.7 | 430761   | 468373.4 | 349503.2 |
| 6588.927 | 9717.425 | 271406.5 | 265266.2 | 630965.2 | 197779   | 56570.33 | 0        | 0        | 0        |
| 8033441  | 6078292  | 46549.4  | 48311.59 | 117212.6 | 56721.22 | 89938.61 | 12117137 | 1058783  | 5188555  |
| 649129.9 | 442528.8 | 50817.72 | 119893.4 | 46006.96 | 128163.3 | 14379.42 | 849540.7 | 26889.78 | 357091.1 |
| 49219.13 | 22285.33 | 98767.51 | 162105.8 | 64792.64 | 126078.1 | 64314.27 | 48294.49 | 70845.66 | 31918.7  |
| 42660712 | 31695081 | 290311.4 | 334596.8 | 532092.4 | 3366030  | 1607566  | 49819390 | 2646463  | 17913665 |
| 2899701  | 726468.8 | 1018195  | 1430120  | 1523660  | 2752364  | 2325043  | 2848000  | 1925438  | 2670639  |
| 29666.91 | 29337.9  | 317975.1 | 177234.9 | 137546.5 | 90952.25 | 63815.05 | 7917.688 | 11655.17 | 5374.446 |
| 93232218 | 71304641 | 15601.51 | 29992.72 | 27473.92 | 153223.9 | 61730.76 | 1.12E+08 | 1652978  | 39593620 |
| 206925.8 | 156452.5 | 2816.012 | 0        | 9891.702 | 0        | 0        | 254461.3 | 0        | 89064.64 |
| 1834802  | 896748.5 | 403094.5 | 562699.4 | 519795.2 | 820687.3 | 1128063  | 2834659  | 1018168  | 1357473  |
| 21071.53 | 9301.235 | 412458.5 | 1292368  | 768883.7 | 589282.2 | 45748.54 | 30878.61 | 12706.04 | 17193.72 |
| 3637858  | 2660136  | 55373.18 | 68958.93 | 98510.52 | 519904.3 | 123949   | 2816837  | 342853.6 | 2313462  |
| 1833630  | 1513964  | 3948006  | 3602054  | 4223430  | 2266199  | 5971872  | 2657239  | 7292.944 | 3542695  |
| 4601702  | 592220.5 | 3457725  | 3590185  | 3579114  | 4718067  | 3199510  | 4709485  | 3932514  | 4247148  |
| 14502471 | 11018891 | 145090.7 | 140238.9 | 115956.9 | 211576.6 | 57942.69 | 12249923 | 1880604  | 7518845  |
| 113865.2 | 77515.06 | 14951.69 | 2894.104 | 6856.3   | 35913.39 | 7721.168 | 147676.2 | 5259.311 | 61814.36 |
| 3288786  | 2416210  | 124857.3 | 140163   | 150449.2 | 149238.2 | 132474.2 | 4257701  | 149902.1 | 1305252  |
| 1438478  | 400461.4 | 554508.9 | 785970.2 | 761811.7 | 1246403  | 1149662  | 1239813  | 943526.9 | 1318460  |
| 28143.99 | 22478.08 | 133281.1 | 43308.69 | 407397.7 | 311816.7 | 180529.5 | 34756.5  | 16637.91 | 6105.672 |
| 171879.1 | 59281.34 | 857985.4 | 868916.7 | 734658.6 | 273780.2 | 207153.7 | 72257.49 | 225970.2 | 168543.5 |
| 1159563  | 710403.9 | 85447.23 | 120044.7 | 128525.2 | 447126   | 466978.7 | 1805280  | 141457.2 | 701978.1 |
| 542423.2 | 387774.4 | 21171.96 | 34477.72 | 33267.99 | 10152.26 | 95351.23 | 724506.6 | 38813.57 | 225559.2 |
| 343088.4 | 71514.49 | 423127.4 | 538626.1 | 448834.9 | 533546.5 | 347521.7 | 373625.6 | 375724.2 | 318817.7 |
| 20918422 | 5050558  | 3185934  | 4577980  | 5389432  | 21120046 | 16902776 | 19901073 | 15701217 | 19032577 |
| 161648.8 | 91069.41 | 71709.47 | 63676.64 | 10015.42 | 54457.15 | 26474.4  | 213184.4 | 21034.73 | 118252.1 |
| 466854.8 | 272190.4 | 31062.69 | 28151.77 | 58528.06 | 334203.9 | 145532.7 | 477028   | 328520.8 | 259427.4 |
| 1366232  | 1036083  | 19249.3  | 36573.39 | 19011.37 | 19889.58 | 0        | 2127448  | 4952.094 | 488920.7 |
| 528587.9 | 387604.7 | 13121.03 | 11332.15 | 3499.073 | 9368.202 | 94615.24 | 797726.7 | 30876.87 | 240749.4 |
| 828386.7 | 490910   | 96403.55 | 125090.1 | 186193.5 | 168539.1 | 428572.9 | 60202.41 | 671850.7 | 1343334  |
| 3343.569 | 4666.615 | 96637.38 | 35227.75 | 91074.59 | 170293.7 | 15901.94 | 0        | 0        | 7081.574 |
| 202653.2 | 133888.3 | 0        | 0        | 0        | 0        | 155948.8 | 338560.4 | 6671.845 | 311499.8 |
| 9802435  | 7426937  | 155876.2 | 197297.3 | 165650.2 | 207655.9 | 96567.23 | 15338524 | 312598.1 | 4368535  |
| 462988.2 | 66819.37 | 613489.9 | 723864.2 | 727820.6 | 799745   | 412205.6 | 470308.3 | 451542.1 | 375607.7 |
| 148953.5 | 109951.5 | 9680.518 | 2970.317 | 0        | 11130.46 | 8021.305 | 255051.9 | 5911.118 | 68296.98 |
| 5083659  | 3508794  | 452162.7 | 550916   | 521979.4 | 645951.6 | 492843.7 | 6821048  | 599394.5 | 2607464  |
| 109815.9 | 84674.17 | 0        | 0        | 0        | 0        | 0        | 102773.2 | 0        | 61078.83 |
| 995121.2 | 698984.6 | 74397.09 | 112781.5 | 92631.97 | 128593.3 | 38377.22 | 1521478  | 61473    | 445536.1 |
| 7166211  | 5462420  | 81587.2  | 130560   | 94576.46 | 96280.61 | 9410.309 | 8790961  | 174216   | 2890711  |

|          |          |          |          |          |          |          |          |          |          |
|----------|----------|----------|----------|----------|----------|----------|----------|----------|----------|
| 7743487  | 5168474  | 212905.7 | 489058.5 | 548106.9 | 2246280  | 2025960  | 1424295  | 12595218 | 12777750 |
| 384393.2 | 292129   | 3255.874 | 16406.21 | 8997.457 | 0        | 0        | 783746.8 | 39275.35 | 242366.5 |
| 827050.1 | 580016   | 1396317  | 1738532  | 1781963  | 1532328  | 1370983  | 1371370  | 1474177  | 146041.3 |
| 85178.97 | 64825.65 | 3166.714 | 0        | 3021.932 | 0        | 0        | 65618.03 | 5450.384 | 51361.12 |
| 3059390  | 2319085  | 88229.72 | 145011.1 | 39859.45 | 13080.15 | 0        | 6440850  | 175716.1 | 1847622  |
| 159649.9 | 75263.21 | 227785   | 1053500  | 572207.9 | 949384   | 333888.9 | 194248.3 | 104277   | 93689.09 |
| 4756804  | 2653477  | 29397.3  | 7843.694 | 19542.47 | 2602919  | 3691330  | 6126406  | 2576403  | 6192553  |
| 2295149  | 1410753  | 437910   | 477549.3 | 492937.5 | 499478.5 | 448695.9 | 3311504  | 501547   | 1285104  |
| 549718.3 | 419746.7 | 2896.531 | 10778.63 | 4200.026 | 8860.798 | 10872.64 | 483183.9 | 78906.46 | 228789.3 |
| 337557.6 | 97073.29 | 11265.29 | 30218.36 | 56743.04 | 295047.5 | 314501   | 346625.4 | 220541.7 | 268044.2 |
| 5799425  | 4269813  | 271358.9 | 316356.2 | 312019.8 | 336629.9 | 199879.1 | 6932779  | 419766.2 | 3143225  |
| 1796046  | 958669   | 267052.3 | 92245.14 | 415089.1 | 1373696  | 720642   | 2924354  | 818321.2 | 1794466  |
| 179538.1 | 132268.8 | 11464.45 | 6044.673 | 0        | 0        | 28521.29 | 148370.5 | 41917.07 | 98989.84 |
| 1642305  | 1211257  | 72504.24 | 62655.57 | 57158.06 | 153957.9 | 50881.07 | 1393579  | 247908.5 | 807683   |
| 100549.2 | 38278.71 | 8912.844 | 9329.888 | 13115.7  | 35912.69 | 116219.4 | 159125.6 | 87025.8  | 57680.1  |
| 433291.3 | 332933.6 | 3048.976 | 12355.47 | 4632.012 | 0        | 0        | 157751.4 | 0        | 744540.4 |
| 1861934  | 1439372  | 10032.47 | 6324.307 | 3272.306 | 13217.47 | 0        | 3434790  | 24739.43 | 950787.2 |
| 317090.8 | 210304.9 | 0        | 0        | 2971.58  | 82111.82 | 173074.9 | 525302   | 81245.43 | 217793.9 |
| 1946091  | 1415214  | 101980.7 | 165669.2 | 161218   | 131177.3 | 57235.78 | 3277050  | 99929.5  | 857846.7 |
| 32689.73 | 33758    | 490834   | 2140333  | 1334733  | 1910140  | 57360.89 | 14626.31 | 13049.51 | 25686.16 |
| 1500555  | 1164119  | 4609.413 | 0        | 2574.924 | 3840.476 | 0        | 2531118  | 3701.653 | 562674.7 |
| 349678.6 | 249723.4 | 1155183  | 1137749  | 2787618  | 3978919  | 1047497  | 500014.1 | 113266.3 | 106835.1 |
| 110355.5 | 81439.81 | 3000.9   | 0        | 3621.081 | 7790.027 | 14806.08 | 87304.41 | 27045.04 | 60499.68 |
| 178057.7 | 91579.39 | 6449.619 | 12440.18 | 21150.2  | 71952.87 | 166619.4 | 316695.5 | 104824.6 | 91729.01 |
| 6943306  | 4960189  | 144877.9 | 133864.1 | 184847.7 | 1385789  | 1139646  | 5046699  | 6079996  | 4460066  |
| 1708125  | 1011717  | 73259.86 | 74720.24 | 72280.24 | 413989.9 | 1430061  | 2767573  | 460672.5 | 1478121  |
| 715657.8 | 538670.1 | 6344.954 | 0        | 0        | 3334.868 | 124902.6 | 896902.9 | 117088.8 | 189318.7 |
| 114868.5 | 84326.8  | 0        | 0        | 0        | 12526.56 | 23832.71 | 191523.5 | 5535.532 | 75088.58 |
| 1146504  | 788170.9 | 144342.1 | 159939.8 | 224569.3 | 89038.04 | 76840.21 | 658845.9 | 331035.3 | 759235.1 |
| 2280316  | 1774646  | 5858.812 | 13796.96 | 0        | 3327.694 | 17720.9  | 5083672  | 232535.9 | 1952280  |
| 686751.3 | 323758.9 | 40446.88 | 34672.71 | 58707.72 | 403676.1 | 641731.1 | 736613.5 | 492944.6 | 677720.1 |
| 1419715  | 1108510  | 2389.111 | 0        | 3296.721 | 0        | 0        | 1662119  | 4151.979 | 561397.5 |
| 950869.6 | 734146.7 | 6700.978 | 9531.737 | 5714.849 | 14373.05 | 22877.26 | 1543818  | 172755   | 643103.5 |
| 80370.59 | 28855.31 | 294786.6 | 329709.4 | 338536.8 | 641662.1 | 76911.88 | 61143.79 | 85647.16 | 47181.65 |
| 3115835  | 2511278  | 11850330 | 8870287  | 13168156 | 1111220  | 10610225 | 7449241  | 3082489  | 1358057  |
| 250499.3 | 155045.8 | 370775.9 | 314179.8 | 858757.6 | 988761.3 | 587485.2 | 221007.8 | 128701.9 | 123608.8 |
| 5079223  | 3738007  | 228810   | 227947.8 | 162803.2 | 426828   | 496337.9 | 10938260 | 1103669  | 3792422  |
| 153592.2 | 98652.01 | 18355.95 | 27031.91 | 22937.24 | 31126.34 | 40205.48 | 147300.2 | 29970.97 | 97282.09 |
| 319061.6 | 238834.2 | 0        | 3363.64  | 3782.834 | 23536.74 | 43322.61 | 169849.2 | 136967.4 | 155699.7 |
| 1257988  | 796799.3 | 0        | 6603.089 | 8278.447 | 80578.24 | 1095062  | 1884714  | 211070.1 | 767622.8 |
| 416407.8 | 133775.7 | 130447.6 | 263185.1 | 234128.9 | 319791.1 | 288309.3 | 381147.3 | 243721.1 | 358689.5 |
| 3258926  | 2508322  | 13449.75 | 27088.42 | 12319.94 | 227336   | 32467.75 | 4311940  | 114266.9 | 1262163  |
| 3696973  | 2797658  | 109726.6 | 109588.4 | 174276.2 | 142609.7 | 129073.2 | 3374724  | 637490.3 | 1385566  |
| 2773468  | 1868073  | 326799.2 | 436668.3 | 400884   | 452983   | 355223.7 | 4299881  | 397644.9 | 1133169  |
| 13908642 | 10748153 | 92617.7  | 71589.95 | 174234.5 | 710684.2 | 62203.16 | 13093983 | 2385987  | 6517003  |
| 159293.2 | 123701.2 | 8999.42  | 0        | 0        | 0        | 0        | 120539.2 | 0        | 150810.3 |
| 647044.4 | 491965.7 | 28483.69 | 33635.2  | 7804.973 | 25129.4  | 8058.181 | 725675.5 | 4914.692 | 334925.8 |

|          |          |          |          |          |          |          |          |          |          |
|----------|----------|----------|----------|----------|----------|----------|----------|----------|----------|
| 150560   | 112849.1 | 0        | 2924.606 | 5745.99  | 28147.86 | 0        | 92509.66 | 23226.58 | 98420.35 |
| 611777.5 | 423014.7 | 0        | 4358.712 | 23034.19 | 38894.29 | 355215.9 | 867561.7 | 146817.1 | 159108.3 |
| 1480418  | 1163096  | 5629.296 | 3442.193 | 0        | 0        | 0        | 1725941  | 0        | 578111.2 |
| 8853967  | 6921755  | 16424.57 | 35580.97 | 30731.16 | 115514.2 | 82990.24 | 10398968 | 143896.3 | 3472232  |
| 597804.7 | 515680.3 | 2150715  | 2034736  | 5353526  | 7717040  | 2000177  | 986601.3 | 205639.9 | 276438.3 |
| 4508204  | 1634389  | 825812.4 | 1263132  | 1370655  | 3351389  | 4171423  | 4745731  | 2266894  | 4205293  |
| 6802056  | 5189282  | 29322.5  | 50413.44 | 137342.6 | 75484.13 | 849600.5 | 12656754 | 1542417  | 5315330  |
| 498247.1 | 219279.4 | 3312665  | 4609222  | 2786784  | 1319996  | 576291.1 | 538238.5 | 770657.9 | 164552.7 |
| 2232289  | 1598106  | 11304.66 | 13603.35 | 15980.7  | 7400.139 | 1162120  | 3207711  | 164718.9 | 1080227  |
| 20411568 | 16081888 | 25281.84 | 26790.02 | 21409.36 | 6310.241 | 21459.67 | 33311621 | 34280.51 | 6112509  |
| 359577   | 227501.4 | 69437.99 | 97149.11 | 93726.85 | 33775.12 | 66843.92 | 558975.9 | 10445.19 | 300822.3 |
| 264558.3 | 110345.6 | 28549.68 | 15053.99 | 30127.2  | 166750.9 | 264467.3 | 288674.3 | 295995.2 | 379120.4 |
| 1818117  | 194839.8 | 1107201  | 1699815  | 1452413  | 1670756  | 1536843  | 2042981  | 1646829  | 1773489  |
| 213398.8 | 150586.5 | 2221.271 | 8617.892 | 4369.318 | 11094.16 | 101856.5 | 357824   | 57585.75 | 117433.3 |
| 613692.2 | 445579.5 | 33865.11 | 52818.84 | 17135.42 | 67262.44 | 76997.33 | 770517.3 | 74370.61 | 447881.7 |
| 1695964  | 697736.4 | 4068358  | 4199343  | 3965397  | 1475286  | 2441148  | 1783823  | 2622433  | 2040868  |
| 4437529  | 3341248  | 154586.4 | 174743.5 | 138690.9 | 246194.3 | 324568.6 | 293911.8 | 6867251  | 5520529  |
| 1722343  | 1216323  | 161871.6 | 209908.1 | 209242.6 | 208920.4 | 125873.4 | 1947897  | 184869.1 | 762363.9 |
| 1399332  | 1260812  | 7584650  | 4650963  | 7024569  | 194516.2 | 5814570  | 3575346  | 1208007  | 874925.7 |
| 793544.9 | 151910.6 | 3809396  | 5491997  | 3574194  | 1827567  | 796034.3 | 571078.7 | 911993.9 | 737982.2 |
| 3398333  | 2479508  | 88914.44 | 132681.6 | 191825.4 | 427857.4 | 517767.5 | 3842290  | 214349.8 | 1528560  |
| 603185.1 | 100047.3 | 151591   | 277246.3 | 249875.2 | 604930.8 | 524345.5 | 672021.7 | 598228.8 | 456372.1 |
| 173802.8 | 129757.1 | 0        | 5974.483 | 6485.594 | 0        | 42037.02 | 156372.4 | 15343.41 | 120144.8 |
| 370201.8 | 288385.9 | 6780.149 | 0        | 0        | 4394.666 | 21159.93 | 612096.4 | 21221.16 | 99756.68 |
| 170317.4 | 91760.07 | 44607.06 | 53043.85 | 17020.59 | 33081.98 | 132839   | 146125.4 | 99573.95 | 105916.4 |
| 793421.2 | 463732.9 | 158142.7 | 207391.6 | 196999.3 | 334174.4 | 165048   | 1203083  | 169706   | 435068.6 |
| 828498.5 | 549267.9 | 143177.7 | 138977.8 | 141853.2 | 198976.6 | 65141.11 | 1151304  | 89811.64 | 528486.9 |
| 99592.74 | 67066.26 | 0        | 38161.46 | 19132.15 | 18700.26 | 4169.422 | 124826.7 | 0        | 81227.89 |
| 254084.7 | 136884.4 | 10013.86 | 18076.68 | 36535.19 | 129345.5 | 205707.5 | 218698.6 | 160195.1 | 98367.68 |
| 764727.5 | 433209.7 | 119505.4 | 71454.02 | 113613.6 | 134778.1 | 658912.6 | 1286819  | 160092.6 | 526426   |
| 2154807  | 1606165  | 89239.8  | 87831.51 | 102214.6 | 274331.5 | 112130.2 | 3389915  | 165742.8 | 950334.9 |
| 605266.3 | 423745.7 | 982613.5 | 4350966  | 1806520  | 3800786  | 1416636  | 414110.6 | 551543.6 | 652524.4 |
| 1345430  | 1042571  | 29460.76 | 25642.86 | 17184.59 | 24438.91 | 70298.92 | 2323118  | 317786.1 | 625528.5 |
| 490253.3 | 293835.5 | 14778.04 | 86025.01 | 50382.1  | 153185.6 | 330554.1 | 292629.2 | 191380.9 | 359649.5 |
| 997973.3 | 692847.4 | 58585.2  | 62777.92 | 178304.1 | 47591.61 | 315194.5 | 1894223  | 78796.7  | 610553.3 |
| 214834.8 | 141410.2 | 10750.19 | 6155.104 | 8162.167 | 23740.63 | 150938.2 | 355052.9 | 37332.78 | 303569.8 |
| 6905489  | 5254452  | 140471.5 | 172878.9 | 156778.9 | 770652.4 | 282978.6 | 5016111  | 912274   | 3964005  |
| 26874163 | 21191469 | 248313.6 | 253096.4 | 207786.5 | 318313.2 | 165251.8 | 14433280 | 4792648  | 17624598 |
| 168666.5 | 65639.67 | 351794.8 | 430614.7 | 459768.4 | 345879.4 | 109247.3 | 161263   | 244656   | 184182.1 |
| 8823.919 | 7197.14  | 68877.79 | 41416.7  | 173906.8 | 190966   | 35949.15 | 8387.014 | 4857.703 | 11836.42 |
| 4057456  | 2946686  | 117706.3 | 124200.7 | 168220.8 | 932497   | 526612.6 | 3088020  | 700367.9 | 2391319  |
| 3164561  | 831037.1 | 1239287  | 1815095  | 1731732  | 3061826  | 2321281  | 3231578  | 1983697  | 2842086  |
| 474968.7 | 354644   | 3406.74  | 5116.616 | 8265.163 | 21694.82 | 123785.5 | 957984.7 | 224345.9 | 450537.2 |
| 8222032  | 5422580  | 409424.8 | 605631.4 | 525439.2 | 3211852  | 2812157  | 2819802  | 13772596 | 13219923 |
| 465787.4 | 366858.8 | 5409.032 | 2698.34  | 0        | 11295.72 | 11450.17 | 380555.4 | 39739.09 | 257538.9 |
| 2716259  | 2082897  | 36424.52 | 24499.96 | 58160.64 | 53214.68 | 382877.2 | 5322740  | 651733   | 1332925  |
| 1361290  | 1045862  | 50499.39 | 43890.96 | 61295.65 | 66511.22 | 34271.99 | 856339   | 234740.7 | 814695.1 |



|          |          |          |          |          |          |          |          |          |          |
|----------|----------|----------|----------|----------|----------|----------|----------|----------|----------|
| 1235690  | 191683.7 | 5905213  | 9022288  | 5273170  | 2707175  | 1550022  | 1123905  | 1520989  | 1082318  |
| 1679130  | 297647.4 | 3278457  | 2336758  | 2165929  | 2594102  | 1675490  | 1309196  | 1585337  | 2056660  |
| 8510389  | 6663529  | 181243.6 | 223635   | 231204.3 | 147607   | 61716.84 | 13400584 | 163531.3 | 2460653  |
| 13375.84 | 6397.905 | 100755.2 | 60399.92 | 302493   | 244333.3 | 60901.32 | 19093.84 | 14180.52 | 6831.372 |
| 281873.6 | 185344   | 0        | 3540.346 | 0        | 0        | 243620.5 | 467931.7 | 96275.05 | 472522.6 |
| 541478.3 | 420525.1 | 8582.13  | 6558.555 | 7658.271 | 47496.62 | 12174.73 | 981301.8 | 15016.31 | 216496.3 |
| 273227.8 | 206546.2 | 2651.949 | 11042.73 | 13091.04 | 31960.63 | 18999.81 | 546797.4 | 14278.4  | 157996.8 |
| 184820.7 | 40299.44 | 302075.2 | 373454.7 | 289937.8 | 294683.2 | 154609.2 | 125316.6 | 209373.1 | 160604.9 |
| 1764726  | 1136785  | 104004.5 | 136198   | 1019028  | 106695.9 | 490213   | 2535970  | 99133.08 | 1087823  |
| 2209771  | 1742056  | 23859.68 | 35858.38 | 25176.23 | 69194.39 | 36365.54 | 2479845  | 17053.9  | 879266.6 |
| 1260442  | 194222.7 | 657421.1 | 1022589  | 793196.9 | 1303488  | 889601   | 1260033  | 947905.1 | 1270703  |
| 494329   | 362364.1 | 24165.75 | 28319.36 | 49569.1  | 93282.16 | 25691.38 | 668994   | 40548.22 | 257433.3 |
| 250641.1 | 197649.4 | 4839.927 | 0        | 4635.679 | 3311.113 | 10980.46 | 338542.6 | 21085.84 | 137191.3 |
| 1899670  | 1399498  | 157495.5 | 141010   | 176794.5 | 197117.1 | 128917.5 | 2054490  | 254702.1 | 955561.8 |
| 780788   | 328875.6 | 6541.247 | 5930.539 | 59851.71 | 136335.3 | 961264.2 | 1209789  | 372643.9 | 790545.4 |
| 268784.4 | 122475.7 | 85580.05 | 92111.75 | 90763.09 | 206856.9 | 120397.2 | 312927   | 138816.1 | 142978.6 |
| 7290316  | 5657772  | 227666.3 | 305070.5 | 235994.8 | 399418.8 | 194275.8 | 8492952  | 328435.6 | 2692538  |
| 363930.8 | 207389.7 | 4182.734 | 18877.43 | 41944.08 | 178157.9 | 284550.2 | 480585   | 60941.14 | 235981.2 |
| 1227192  | 734072.2 | 258479   | 411898.1 | 354202.7 | 326283.7 | 245690.6 | 1780834  | 262557.8 | 613268.5 |
| 3422741  | 2729840  | 60053.2  | 35360.89 | 21751.56 | 15827.96 | 64448.02 | 6540578  | 6152591  | 758368.6 |
| 65210.89 | 40690.53 | 25200.69 | 16060.93 | 4811.103 | 32031.01 | 0        | 24492.13 | 106508.6 | 90430.88 |
| 2453304  | 1936102  | 41854.8  | 34766.07 | 60425.02 | 95847.41 | 41194.36 | 2778846  | 17590.77 | 1007378  |
| 301312   | 142473.2 | 66184.78 | 66896.65 | 113500.9 | 246248.8 | 137621.6 | 436921.5 | 123495   | 172575.4 |
| 220461   | 175130.6 | 0        | 0        | 3649.795 | 14688.53 | 0        | 508624.9 | 41382.56 | 196211.3 |
| 2289256  | 1795785  | 65936.8  | 71141.63 | 70805.62 | 88595.52 | 35412.89 | 1591117  | 353687.8 | 1211593  |
| 158570.1 | 128148.1 | 0        | 0        | 0        | 0        | 0        | 248656.2 | 6166.672 | 32377.28 |
| 70614.29 | 45238.48 | 171346.8 | 52092.13 | 452214.3 | 350723   | 272761.9 | 131324   | 5533.896 | 59233.23 |
| 3872958  | 3015867  | 141101.4 | 173577.1 | 170144.5 | 184642.6 | 45731.4  | 2919361  | 439914.6 | 2118262  |
| 945438.5 | 541741.8 | 261607.7 | 98904.34 | 284349   | 289375.2 | 486589.2 | 1643278  | 300934.3 | 503292.4 |
| 7566186  | 5702266  | 491072.5 | 585079.7 | 323182.2 | 533200   | 664463.3 | 7624624  | 7523662  | 2819066  |
| 78591.66 | 63240.85 | 86161.38 | 138869   | 311402.1 | 297176.8 | 179950.8 | 139663.1 | 0        | 31548.03 |
| 343585.9 | 273443   | 11035.03 | 7890.316 | 3702.588 | 5895.284 | 0        | 732399.2 | 29274.97 | 149673.7 |
| 856880.1 | 691275.7 | 0        | 7029.115 | 3158.726 | 0        | 4642.961 | 381400.1 | 4934.458 | 1161470  |
| 10598676 | 7645658  | 1050139  | 1238111  | 1232746  | 1401670  | 858861.5 | 14647972 | 999764.5 | 4595382  |
| 876590.9 | 403441   | 372064   | 441683.6 | 475172.5 | 228145.4 | 403699.8 | 801910.9 | 307014.6 | 1201861  |
| 5583898  | 1119391  | 2954617  | 3807436  | 3907829  | 5606754  | 4035784  | 5983529  | 4114799  | 5229994  |
| 52326.65 | 30598.51 | 515249.2 | 888066.3 | 478490.8 | 194300.8 | 97257.87 | 56420.91 | 95863.67 | 24930.78 |
| 4229663  | 3114167  | 130980.6 | 171746.4 | 204323.9 | 826794.8 | 644230.2 | 6279266  | 337253.7 | 1943066  |
| 1549186  | 1209697  | 67318.2  | 67494.02 | 46757.15 | 69986.83 | 30099.67 | 997340.1 | 309052.9 | 971718.9 |
| 262853.2 | 119865.5 | 442549.7 | 253648.3 | 1047142  | 1331964  | 944093.9 | 251578.6 | 109139   | 255417.5 |
| 3890101  | 3025373  | 181741.9 | 242787.5 | 230595.1 | 89432.38 | 54557.6  | 4503002  | 128008.9 | 1519749  |
| 643577.3 | 538478.8 | 1191884  | 3932791  | 3145410  | 6509781  | 1498394  | 513153.1 | 169517.9 | 315399.1 |
| 37337.2  | 43949.28 | 195352.4 | 172666.5 | 769962.9 | 500438.7 | 177652.5 | 63864.74 | 0        | 5679.426 |
| 1050919  | 837476.4 | 10935.1  | 7811.101 | 16250.57 | 42764.11 | 14751.76 | 1253256  | 9111.724 | 390515.1 |
| 183108.9 | 148603.4 | 0        | 0        | 0        | 0        | 0        | 213220.5 | 0        | 59877.94 |
| 1626572  | 1262241  | 10898.45 | 16496.62 | 77858.94 | 60766.39 | 198435.5 | 3186133  | 852568.8 | 2685962  |
| 231955.5 | 175938.4 | 0        | 8732.275 | 10267.56 | 9695.564 | 50964.29 | 134561.5 | 48975.92 | 157822.5 |

|          |          |          |          |          |          |          |          |          |          |
|----------|----------|----------|----------|----------|----------|----------|----------|----------|----------|
| 42024.33 | 47018.15 | 102149.9 | 112628   | 420917.3 | 476796.4 | 177532.3 | 59717.68 | 0        | 0        |
| 1803336  | 1441755  | 6251.251 | 11234.44 | 19175.56 | 70992.65 | 32648.08 | 2450062  | 50142.35 | 647346.5 |
| 262379.3 | 224953.9 | 738976.2 | 974550.5 | 846797.7 | 630555.2 | 149221.6 | 101707.5 | 575041.9 | 427049.9 |
| 1463486  | 1185278  | 3314.361 | 5352.877 | 4796.856 | 8147.653 | 0        | 3363169  | 92807.59 | 1142428  |
| 346035.6 | 148236.7 | 2981.194 | 0        | 6146.61  | 0        | 442455.3 | 459664.8 | 138443.9 | 249965.9 |
| 128344.7 | 46936.26 | 229711.7 | 321261.2 | 231883.2 | 271307.9 | 98063.39 | 82919.03 | 169973.7 | 105923.6 |
| 300791.1 | 147822.5 | 93802.67 | 41785.18 | 119162.9 | 35311.66 | 279759.3 | 373394.6 | 55277.51 | 280544.5 |
| 428027.2 | 333656.1 | 20419.1  | 46112.71 | 5870.914 | 4213.689 | 12858.39 | 672462   | 44672.67 | 80920.24 |
| 191077.2 | 153310.8 | 6762.78  | 0        | 0        | 0        | 6137.834 | 358079.8 | 0        | 62365.89 |
| 128594.4 | 31690.19 | 149391.1 | 242012.5 | 195741   | 220189.3 | 131253.3 | 129079.9 | 132145.4 | 77306.39 |
| 104259.5 | 81954.13 | 0        | 0        | 0        | 6405.313 | 12376.33 | 159322.3 | 6397.064 | 57232.64 |
| 491780.2 | 368100.5 | 0        | 8172.064 | 11185.62 | 3331.114 | 202290.8 | 797708.6 | 237358   | 222101.7 |
| 319155.7 | 246421.4 | 4875.396 | 4808.443 | 0        | 38637.03 | 38131.28 | 413284   | 8512.821 | 236498.3 |
| 7386094  | 5914487  | 118499.9 | 186923.7 | 141346.2 | 153676.2 | 49689.42 | 14238923 | 205454.5 | 3004849  |
| 1067580  | 636459.4 | 236857.2 | 319888.9 | 289767   | 360885.1 | 234719.8 | 1683228  | 256076.2 | 517459.7 |
| 366165   | 265197.2 | 55781.79 | 53238.07 | 23697.2  | 35440.28 | 37734.68 | 595080.6 | 38530.86 | 228626   |
| 2595670  | 1506824  | 9029.044 | 2419.369 | 13896.74 | 1364350  | 2129244  | 3245353  | 1374165  | 3134433  |
| 4848820  | 3842887  | 129337.8 | 174712.2 | 151052.6 | 188086.6 | 42884.58 | 9867519  | 72591.99 | 2053808  |
| 11988797 | 8245085  | 507749.8 | 766291.1 | 868957   | 4220466  | 3531179  | 3317272  | 20541166 | 20245075 |
| 16830.98 | 7810.073 | 953298.7 | 2307074  | 1230850  | 681804.6 | 30485.7  | 29907.13 | 11721.33 | 10657.78 |
| 3726854  | 2186938  | 46706.75 | 22469.82 | 110667.7 | 1285839  | 3410923  | 5309711  | 1139743  | 3259219  |
| 875708.5 | 708654.1 | 2867.179 | 7943.698 | 5692.385 | 13749.19 | 12770.26 | 2018765  | 86594.96 | 660564.7 |
| 620920.3 | 504677.7 | 0        | 10330.76 | 0        | 5070.147 | 3233.623 | 757801.5 | 0        | 216597.2 |
| 974885.6 | 777722.4 | 973673.7 | 1665321  | 2276507  | 2760607  | 3193886  | 1651105  | 395820.4 | 520326.6 |
| 106882   | 48328.61 | 277289.3 | 161086.6 | 260525   | 207961.7 | 94361.29 | 97156.33 | 80527.08 | 46570.27 |
| 680671.7 | 471911.9 | 60231.63 | 45882.03 | 30097.62 | 281419.8 | 131948.6 | 610450.2 | 86847.62 | 401700.1 |
| 17049509 | 13703490 | 277421.7 | 379714.7 | 324820.3 | 424933.4 | 142084.7 | 18936693 | 270043.7 | 6193137  |
| 9511919  | 7785240  | 0        | 5188.411 | 0        | 0        | 5832.4   | 18391436 | 7302.64  | 2753962  |
| 663321.9 | 538062.7 | 2893.458 | 0        | 8474.486 | 7745.434 | 11689.45 | 967173.2 | 10020.47 | 220778.4 |
| 11152.97 | 5331.343 | 44751.85 | 48686.78 | 200002.4 | 186468.9 | 56206.37 | 10147.05 | 9996.319 | 6443.731 |
| 366274.5 | 279393.8 | 994206.8 | 2514865  | 1355621  | 803865.4 | 651931.6 | 497100.3 | 175684.5 | 185799.5 |
| 3048334  | 2419812  | 5680543  | 17936841 | 14230613 | 29553899 | 6556568  | 2749797  | 937605.3 | 1409722  |
| 1629759  | 971182.3 | 3076103  | 1742172  | 5282364  | 8431303  | 4837837  | 2602249  | 227233.3 | 1484926  |
| 292763.8 | 213139.9 | 46537.85 | 46147.68 | 18280.76 | 37247.93 | 17016.45 | 286994.4 | 22489.93 | 155936.2 |
| 4526658  | 3472138  | 310835.4 | 389350.9 | 316585.4 | 285819.6 | 154165.8 | 5490200  | 72968.49 | 1760850  |
| 3009182  | 2060674  | 273736.5 | 520445.2 | 902601.7 | 362607.3 | 460920.1 | 2925161  | 251002   | 1850425  |
| 255109.4 | 97626.8  | 514167.1 | 644610.9 | 645524.7 | 980253.7 | 192847.6 | 280690.8 | 121926.4 | 235266.9 |
| 1271012  | 463406.5 | 9596053  | 3510738  | 7590206  | 3019059  | 2200527  | 1698974  | 1816377  | 1035588  |
| 45912.27 | 57424.56 | 379258   | 365597.2 | 849170.1 | 1572705  | 314856.1 | 53394.11 | 16274.61 | 9773.813 |
| 19582987 | 16010688 | 93477.84 | 108617.9 | 97523.36 | 69978.66 | 62030.92 | 24247431 | 506610.4 | 5053256  |
| 11725.79 | 23276.63 | 170844.8 | 136005.5 | 374407.4 | 735056.1 | 171214.2 | 0        | 5481.741 | 0        |
| 952749.5 | 574683.9 | 3796.026 | 5794.444 | 12775.35 | 421415.3 | 780791.6 | 1442375  | 524813.5 | 576012.5 |
| 755152.8 | 497703.8 | 3431.437 | 7329.511 | 63198.89 | 253037.5 | 466813.1 | 648465.8 | 397417.3 | 1570012  |
| 458837.5 | 314568.4 | 32257.4  | 39080.88 | 19948.07 | 151329.3 | 157839   | 623799.7 | 79978.73 | 178482.3 |
| 71057.37 | 55809.56 | 0        | 0        | 3377.673 | 3304.142 | 9826.399 | 136716.3 | 18836.18 | 95607.88 |
| 2742655  | 2180506  | 31250.16 | 45820.97 | 248558.3 | 22722.83 | 119971.2 | 2319260  | 306576.7 | 1735551  |
| 2799299  | 1770844  | 679246.7 | 945529.5 | 855093.3 | 404675.1 | 407158.4 | 4269925  | 160032.3 | 1995467  |

|          |          |          |          |          |          |          |          |          |          |
|----------|----------|----------|----------|----------|----------|----------|----------|----------|----------|
| 710492.9 | 574076.3 | 11238.06 | 36864.11 | 6325.107 | 12194.66 | 0        | 1175297  | 18271.52 | 151732.9 |
| 681277.7 | 351390.8 | 194385.3 | 134137.4 | 253076.8 | 181262.2 | 534442.8 | 420590.5 | 1041241  | 491152.6 |
| 335289.4 | 187706.9 | 0        | 0        | 0        | 258335.1 | 228744.7 | 397803.6 | 207960.6 | 167957.5 |
| 175344.7 | 137269   | 0        | 8406.659 | 38012.16 | 0        | 0        | 352327.1 | 0        | 153561.3 |
| 1910930  | 1329946  | 153048   | 214428.5 | 180249.4 | 484009.7 | 480814.8 | 536979.7 | 3198023  | 3378377  |
| 9191490  | 7544099  | 20951.22 | 23507.74 | 50090.72 | 33146.17 | 53309.07 | 7110145  | 721050.9 | 5330823  |
| 430484.4 | 142067.1 | 125007.1 | 241825.2 | 206541.2 | 309805.6 | 378278.7 | 365244.8 | 262882.5 | 367375.5 |
| 889883   | 536718.5 | 80340.77 | 89941.36 | 80238.33 | 409639.4 | 575810.7 | 1259458  | 486890.3 | 442794.9 |
| 657037.9 | 540944.4 | 0        | 0        | 0        | 4563.563 | 0        | 939876.4 | 0        | 195749.8 |
| 792036.1 | 587601   | 62084.04 | 84399.94 | 91769.98 | 86049.2  | 73356.7  | 1012387  | 46693.22 | 421463.4 |
| 9941333  | 6890284  | 1543657  | 1031362  | 549886.4 | 1033965  | 4204788  | 3856720  | 14746281 | 3099568  |
| 3176456  | 1049772  | 804899.1 | 1424611  | 1631557  | 2959712  | 2252540  | 2734673  | 1817992  | 2886841  |
| 1287047  | 594814.6 | 49742.41 | 232415.6 | 328085   | 995182   | 1012205  | 980232.7 | 586365.3 | 1050308  |
| 4364755  | 1448656  | 713061.8 | 987371.9 | 1132926  | 4045604  | 3825569  | 4688748  | 2665865  | 3099154  |
| 136872.5 | 47091.23 | 388539.2 | 280839.8 | 850416.7 | 686862   | 177409.5 | 135697   | 199792.4 | 71660.97 |
| 10254955 | 8408362  | 118202.3 | 153013.2 | 80797.09 | 16947.09 | 26209.67 | 23739170 | 758243.8 | 7134034  |
| 340367.4 | 226718.7 | 0        | 0        | 0        | 9450.455 | 305948.5 | 627497.8 | 53975.21 | 275172.5 |
| 4183549  | 3453206  | 3896.686 | 10873.31 | 7642.807 | 8422.477 | 9927.037 | 7925519  | 47231.74 | 1737342  |
| 192386.6 | 95619.62 | 27206.58 | 37967.5  | 19235    | 147655.2 | 136428.2 | 177046.6 | 147876.4 | 81485.95 |
| 871275.9 | 717330.8 | 5034.181 | 3718.793 | 3927.295 | 8339.556 | 0        | 1571506  | 0        | 294615.3 |
| 14985.74 | 9942.678 | 36547.32 | 219123.8 | 232510   | 243176.3 | 19343.71 | 19313.68 | 27053.76 | 12623.46 |
| 471616.2 | 389766.7 | 0        | 2810.688 | 0        | 0        | 0        | 959019.9 | 0        | 154391.1 |
| 830232.8 | 585971.1 | 125278   | 142807   | 142952.2 | 191019.3 | 18888.89 | 1077472  | 85621.42 | 408604.2 |
| 110615.3 | 89432.42 | 0        | 0        | 0        | 5150.361 | 7856.154 | 146375.5 | 5378.186 | 64059.47 |
| 619309.4 | 511256.7 | 1952.981 | 3577.465 | 2804.613 | 0        | 0        | 744284.3 | 0        | 199693.3 |
| 258769.6 | 198338.4 | 11166.97 | 14602.34 | 22795.7  | 27681.82 | 19949.45 | 384941.1 | 8154.124 | 88469.34 |
| 650627.2 | 328034.4 | 150005.3 | 142709.8 | 189701.4 | 288398.8 | 518649   | 1101632  | 263443.2 | 412010.5 |
| 419075.9 | 342943.7 | 9492.385 | 3970.492 | 4835.944 | 0        | 6704.742 | 961348.9 | 35958.49 | 342708   |
| 459842.9 | 214642.1 | 4223.492 | 11286.47 | 5254.426 | 0        | 580317.9 | 816331.4 | 246608.8 | 412092.1 |
| 399598.2 | 307077.2 | 21653.09 | 37620.63 | 41572.62 | 38019.8  | 8990.491 | 392710.6 | 16410.99 | 251112   |
| 162183.1 | 83499.31 | 7197.636 | 16085.39 | 9930.73  | 25512.22 | 183367.7 | 173307.1 | 134970   | 295658.9 |
| 5551106  | 3984413  | 902033.3 | 1008561  | 1052867  | 500221.6 | 320025.9 | 2517408  | 1215259  | 4784757  |
| 16117774 | 5223873  | 3430302  | 6675309  | 6750110  | 15451496 | 12339430 | 13306109 | 9343620  | 15523132 |
| 776153   | 510614.8 | 195897.7 | 257546.4 | 244797.6 | 82921.55 | 46567.76 | 740557.7 | 142837.2 | 426885   |
| 2595315  | 1967091  | 234070   | 306140.3 | 236941.1 | 174887.3 | 178338.7 | 2492809  | 365181.2 | 1274537  |
| 71507.38 | 47223.58 | 191986.5 | 98112.47 | 225499.3 | 483733.2 | 212038.1 | 101569.4 | 7113.07  | 37358.87 |
| 4187651  | 1157691  | 1240014  | 579004.3 | 3118141  | 1373335  | 4493895  | 3935938  | 6128914  | 3203158  |
| 1337388  | 1056509  | 58525.6  | 83290.4  | 68307.48 | 97770.65 | 23048.04 | 1607245  | 62096.75 | 436654.1 |
| 100363.2 | 79420.73 | 3648.723 | 3079.534 | 0        | 0        | 18362.72 | 214667.6 | 10680.15 | 50165.58 |
| 6621.457 | 6799.458 | 110637.2 | 438764.2 | 226035.2 | 444963.5 | 0        | 15383.71 | 6578.373 | 0        |
| 307559.6 | 242492.6 | 23052.14 | 21782.32 | 25059.72 | 10223.81 | 0        | 409669.8 | 23764.02 | 122556.7 |
| 935369.1 | 774671.6 | 5782.203 | 3648.854 | 3621.594 | 5310.393 | 0        | 1714504  | 0        | 320722.9 |
| 9963859  | 7519780  | 882523.3 | 1202151  | 983228.7 | 1119728  | 474199.8 | 14286438 | 350631.7 | 4721184  |
| 2158594  | 1532192  | 278943.4 | 248042.4 | 162144.4 | 340115.4 | 584973.4 | 1005365  | 438414.1 | 2043482  |
| 5286173  | 1391398  | 1948405  | 3027768  | 3279738  | 4931788  | 4160262  | 4837352  | 3813476  | 4366030  |
| 1254736  | 829356.2 | 200952.3 | 237248.9 | 266765.7 | 402150.9 | 197985.2 | 1578851  | 153671.8 | 688336.6 |
| 151939.9 | 72514.65 | 271066.1 | 139781   | 465720.6 | 557369.7 | 305017.4 | 180348.6 | 106856.2 | 92624.82 |

|          |          |          |          |          |          |          |          |          |          |
|----------|----------|----------|----------|----------|----------|----------|----------|----------|----------|
| 153594.5 | 78989.03 | 447617.6 | 452215.8 | 420712.2 | 111019.5 | 245037.4 | 93198.08 | 199113.7 | 79702.34 |
| 2386105  | 1566723  | 298768.1 | 269770.1 | 330910.4 | 1045546  | 667398   | 3189611  | 488369.5 | 1055157  |
| 2913564  | 2323643  | 0        | 2275.39  | 2682.217 | 153985.3 | 499934.6 | 4898357  | 447108.2 | 1992121  |
| 90470.86 | 70101.4  | 0        | 9433.739 | 0        | 15649.92 | 7728.494 | 102073.8 | 52464.03 | 67081.88 |
| 129361.9 | 94871.49 | 0        | 3755.302 | 6348.476 | 13814.77 | 60603.42 | 159396.5 | 6854.568 | 149655.9 |
| 236134.9 | 196486.1 | 0        | 0        | 3032.725 | 0        | 0        | 518587.4 | 0        | 115133.8 |
| 6296471  | 5085050  | 136617.8 | 61024.19 | 385832   | 93014.95 | 339612.8 | 14202458 | 4548687  | 3672522  |
| 819500.4 | 683316.7 | 3084.751 | 0        | 0        | 0        | 0        | 1042062  | 0        | 191843.8 |
| 40326917 | 33419369 | 98913.4  | 67682.22 | 529079.3 | 423685.2 | 290115.5 | 27369904 | 69053567 | 3640687  |
| 367697.9 | 276995.9 | 28203.62 | 19049.4  | 25165.17 | 66361.29 | 42326.83 | 28274.26 | 705205   | 576078.5 |
| 256038.6 | 181818.8 | 16396.08 | 11237.31 | 11248.85 | 151371.8 | 16854.02 | 304698.9 | 22635.98 | 115637.5 |
| 993148.8 | 650871.1 | 236654.7 | 260002.5 | 201318.5 | 212132.5 | 164220.7 | 1410861  | 46516.65 | 599107.3 |
| 799292.9 | 665362.3 | 2773.819 | 0        | 11023.98 | 5920.782 | 0        | 1837194  | 20821.57 | 580113   |
| 153270.3 | 54884.98 | 61692.43 | 93647.31 | 39869.82 | 111483.5 | 124152.8 | 183500.9 | 64837.18 | 135223.2 |
| 2928634  | 2332074  | 75914.25 | 116169.6 | 121400.8 | 344931.4 | 72073.06 | 3814549  | 185698.5 | 959216.8 |
| 793816   | 493779.8 | 100482.6 | 120960.3 | 152118.6 | 320312   | 360897.8 | 875802.8 | 150628.1 | 448909.2 |
| 4073282  | 3314925  | 16257.39 | 13271.59 | 28058.76 | 198016   | 355592.4 | 7793504  | 0        | 1215622  |
| 50780.79 | 15708.75 | 296125   | 483411.9 | 1837726  | 819639.5 | 495689.5 | 42742.74 | 31303.67 | 59761.29 |
| 94801.99 | 76416.5  | 0        | 2747.387 | 0        | 0        | 16681.53 | 118384.7 | 7991.845 | 55388.69 |
| 989155.1 | 768137.8 | 71265.25 | 162251.4 | 27723.58 | 49334.5  | 61968.44 | 1768081  | 103711.7 | 659338.8 |
| 30290.78 | 52978.97 | 145583   | 144167.8 | 404716.5 | 835425.2 | 303320.7 | 0        | 5976.131 | 6501.317 |
| 8476216  | 6970632  | 128125.5 | 186620.2 | 151246.4 | 298930.6 | 130877.1 | 9543820  | 136298.1 | 2811976  |
| 38938.48 | 17425.75 | 116142.5 | 69462.84 | 258614.2 | 67117.01 | 145708.8 | 39668.78 | 35220.86 | 16209.78 |
| 742764.5 | 456040   | 11765.64 | 37333.48 | 29431.04 | 197297.5 | 674561.6 | 1047824  | 196639.9 | 608425.4 |
| 798716.2 | 667236   | 0        | 4733.13  | 4351.196 | 13859.09 | 0        | 1622907  | 5997.364 | 235973.9 |
| 520077.8 | 279055.7 | 5771216  | 5603657  | 4780002  | 1366622  | 267516.5 | 735201.9 | 853868.3 | 520922.7 |
| 30706.94 | 24132.33 | 127596.8 | 39002.36 | 203029.4 | 71616.23 | 83944.26 | 60077.59 | 0        | 12957.98 |
| 3490081  | 2850131  | 53131.12 | 57501.26 | 78644.26 | 249865.5 | 63010.31 | 3540712  | 236532.2 | 1314302  |
| 935133.9 | 776170.7 | 24994.44 | 14397.81 | 17334.33 | 3607.237 | 0        | 1481950  | 4826.328 | 200580   |
| 9482.4   | 11441.81 | 127496.6 | 974203.8 | 576012.6 | 786868.8 | 26281.62 | 0        | 0        | 7791.928 |
| 377096.2 | 240433   | 118093.5 | 119513.2 | 78630.88 | 31897.06 | 116327.1 | 512876.9 | 60867.58 | 213926.2 |
| 42495.76 | 39330.31 | 128669.8 | 76181.38 | 228549.1 | 139781.2 | 50706.27 | 39185.82 | 0        | 36918.79 |
| 523229   | 304764   | 158447   | 165335.5 | 158798.2 | 194634.8 | 130961.6 | 792080.8 | 82628.02 | 335822.2 |
| 571200.6 | 475343.3 | 0        | 4186.381 | 4958.301 | 0        | 26143.13 | 1312231  | 50958.63 | 402262.8 |
| 17826.92 | 13000.49 | 292185.8 | 443422.7 | 110821   | 240209.9 | 3694.633 | 37771.05 | 8114.285 | 19708.1  |
| 69542.66 | 38142.46 | 211597.6 | 147593.3 | 491161.7 | 121745.8 | 237381.5 | 122410.6 | 61588.6  | 67983.31 |
| 1439598  | 1173408  | 59528.38 | 42542.85 | 46147.28 | 67731.75 | 26215.2  | 774062.4 | 253010.4 | 812016.3 |
| 2160663  | 1823296  | 0        | 0        | 0        | 0        | 0        | 2685545  | 5956.128 | 469833.6 |
| 1100516  | 477597.2 | 1754781  | 2337090  | 2089315  | 2238880  | 881336.5 | 1754395  | 1179612  | 410510.3 |
| 315080.7 | 234658.7 | 4961.733 | 10515.82 | 0        | 26118.39 | 160581.2 | 543908.8 | 122227.5 | 148225.7 |
| 5784192  | 3760519  | 943437.7 | 1179507  | 1262461  | 1741961  | 1556466  | 8060354  | 1196256  | 2236552  |
| 3068738  | 2536814  | 83507.82 | 116711.9 | 70194.97 | 36528.55 | 12583.14 | 2707404  | 271841.6 | 1682727  |
| 359354.9 | 148252.3 | 107816.7 | 12672.73 | 40509.81 | 313466.1 | 299535.4 | 406031.6 | 313016.9 | 407678.9 |
| 620753.6 | 499049.1 | 0        | 4996.497 | 13498.63 | 21272.72 | 114896.4 | 646057.6 | 38500.36 | 495547.9 |
| 716441.1 | 597219.5 | 7181.833 | 14627.65 | 11492.19 | 8331.973 | 5406.788 | 1108308  | 11186.42 | 271016.1 |
| 336939.3 | 343819.8 | 950200.4 | 981498.2 | 587333.3 | 1002609  | 381151   | 89740.9  | 908554.7 | 80492.1  |
| 639946.8 | 429069   | 197014.7 | 183302.4 | 160791.6 | 115016.6 | 19836.72 | 671286.1 | 89194.45 | 446457.7 |

|          |          |          |          |          |          |          |          |          |          |
|----------|----------|----------|----------|----------|----------|----------|----------|----------|----------|
| 157536.4 | 97765.09 | 7404.425 | 6709.303 | 30045.88 | 145819.4 | 8446.962 | 222977.4 | 62981.96 | 129764.9 |
| 1334169  | 883353.1 | 24147.03 | 7873.782 | 46333.78 | 774652.7 | 648198.4 | 1013038  | 881579   | 737440.9 |
| 134436.2 | 50090.51 | 1052030  | 1873410  | 1031038  | 417432.5 | 184108   | 77496.6  | 199447.6 | 105554.3 |
| 1500172  | 243384.4 | 1755654  | 1973376  | 2199156  | 1928063  | 1464950  | 1589721  | 1710256  | 1296620  |
| 988371.8 | 598417   | 9292.251 | 7080.785 | 8490.721 | 6708.895 | 1078680  | 1721891  | 183852.1 | 707661.6 |
| 27517627 | 23182357 | 169249.2 | 177183.8 | 178029.8 | 14624.16 | 24588.89 | 40699.42 | 36212076 | 30015607 |
| 554086.2 | 369727.6 | 3283.517 | 0        | 0        | 336140.8 | 266526.2 | 517352.2 | 120702   | 357471.8 |
| 214499.7 | 71490.1  | 3798.218 | 3585.245 | 4752.013 | 31238.07 | 287690.3 | 317762   | 193037.7 | 210201.5 |
| 3073835  | 2425944  | 164748.4 | 176952.6 | 155162   | 381916   | 178111.2 | 2422857  | 420690.1 | 1596388  |
| 4803746  | 3496243  | 625227.4 | 777733.8 | 760486.2 | 724882.9 | 514453.8 | 8447876  | 582094.7 | 1914466  |
| 231660   | 107873.4 | 469859.2 | 207690.4 | 1714504  | 1441921  | 1045878  | 215838.2 | 208916.6 | 78662.28 |
| 178914.4 | 133693.6 | 13923.21 | 16087.47 | 12930.42 | 14531.58 | 52167.77 | 233499.7 | 0        | 80660.56 |
| 309222.3 | 258902.6 | 16773.82 | 0        | 0        | 4458.867 | 0        | 597864.1 | 0        | 130368.6 |
| 2620106  | 2164979  | 45477.73 | 74982.61 | 64594.3  | 136117.1 | 36512.46 | 2905348  | 185964.9 | 974886.5 |
| 1183278  | 1003840  | 0        | 0        | 8129.99  | 0        | 0        | 2099823  | 22918.22 | 528344.5 |
| 18013006 | 14445173 | 1228891  | 1106902  | 608770.9 | 890480.8 | 1218913  | 11238335 | 25162523 | 7017496  |
| 2465.429 | 3459.205 | 79336.57 | 111353.8 | 309080.7 | 303354.5 | 10048.01 | 0        | 5096.599 | 0        |
| 523506.4 | 402496.8 | 25474.27 | 16410.67 | 39203.45 | 163342   | 16573.65 | 395289.9 | 56707.97 | 321084.1 |
| 1592807  | 1168866  | 123793.5 | 27007.36 | 127812.4 | 394521.4 | 456580.2 | 242890.2 | 2525807  | 2786444  |
| 910515.3 | 372679.8 | 124484.3 | 120355.8 | 159510.3 | 617609.2 | 938341.4 | 1111818  | 258807.6 | 1166266  |
| 36257.24 | 40303.08 | 201639.4 | 214845.5 | 523147.8 | 781204.1 | 103393.7 | 23285.5  | 15986.58 | 0        |
| 223300.6 | 83015.65 | 1316486  | 1842614  | 1083544  | 562408.1 | 152979.9 | 266781.3 | 298617.4 | 131324.9 |
| 188452.1 | 162891.2 | 879146.2 | 540759.4 | 2143830  | 496319.9 | 804540.5 | 451039.5 | 55131.21 | 216173.1 |
| 10342497 | 2924014  | 2848656  | 4921418  | 5085861  | 10428955 | 7936640  | 8637493  | 7011978  | 9503232  |
| 520023.7 | 388731.6 | 0        | 0        | 0        | 139009.6 | 204965.2 | 764476.9 | 268093.6 | 256645.9 |
| 292269.5 | 190855.9 | 38074.39 | 83904.26 | 60683.48 | 121332.8 | 45376.38 | 379440.3 | 45070.53 | 171431.7 |
| 170901.8 | 75371.1  | 48558.31 | 30984.66 | 67765.84 | 156525.1 | 95509.81 | 69301.73 | 256380.9 | 122549.1 |
| 58639.7  | 7558.923 | 589018.4 | 818860.6 | 745794.6 | 143417.3 | 52481.88 | 55025.03 | 53845.32 | 50918.11 |
| 817164.5 | 620015.6 | 75737.84 | 175459.8 | 70591.43 | 133658.8 | 8118.03  | 932219.9 | 16414.06 | 361964.5 |
| 1517557  | 972249   | 324083.1 | 403485.8 | 400229.2 | 535948.6 | 247579.4 | 1999844  | 302957.3 | 701991.7 |
| 786058.1 | 633827.1 | 52825.73 | 46308.18 | 4487.588 | 69907.18 | 48953.15 | 1455766  | 12787.65 | 268561   |
| 2862337  | 2285089  | 145909.5 | 203886.5 | 181373.2 | 118817.5 | 292480.4 | 3017860  | 167565.2 | 1046519  |
| 7937915  | 6556305  | 195293.6 | 243322.9 | 236108.9 | 424352.6 | 231625.3 | 11231525 | 352962.5 | 2746418  |
| 610595.2 | 496197.2 | 36453.58 | 47850.01 | 18712.63 | 17480.12 | 31007.15 | 901963   | 58173.55 | 401641.4 |
| 36393.1  | 37106.53 | 391713.4 | 654174.9 | 774628.8 | 1724323  | 150477.1 | 23984.27 | 6748.613 | 18285.96 |
| 130405.3 | 95244.36 | 3698.892 | 4532.236 | 7366.626 | 7313.076 | 79061.51 | 233366.5 | 66590.27 | 77939.93 |
| 980025.9 | 837911.5 | 3841.272 | 0        | 0        | 0        | 0        | 2048626  | 0        | 271787.8 |
| 1196246  | 707777.4 | 0        | 3573.319 | 0        | 72105.96 | 1344371  | 1339764  | 81038.64 | 1193554  |
| 9173374  | 7743182  | 131188.1 | 163808.9 | 158634.2 | 152393.1 | 35156.91 | 10361302 | 367021.6 | 3845069  |
| 2408261  | 1865321  | 185955.4 | 170244.9 | 75407.46 | 449646.4 | 279560.6 | 1493519  | 302046.8 | 1508084  |
| 383088.7 | 111493.5 | 119593.3 | 68836.04 | 161771.2 | 394153.1 | 305060.1 | 377873.1 | 423901.7 | 281103.1 |
| 1881665  | 1037074  | 238503.2 | 277024.2 | 209356.3 | 895657.8 | 1637372  | 2527860  | 1008153  | 2187576  |
| 2278705  | 1653743  | 209730.7 | 241740.2 | 212531.2 | 798438.3 | 333290.5 | 3025098  | 171553   | 976350.8 |
| 902671.6 | 652573.3 | 160745.2 | 199340.7 | 151584.6 | 109045.1 | 94835.51 | 749882.9 | 162241.6 | 487769.4 |
| 628072   | 94288.17 | 538419.7 | 305319.3 | 600976.7 | 462856   | 513268.1 | 607484.3 | 635172.1 | 491685.3 |
| 753257.3 | 640826.7 | 2253.668 | 3385.32  | 0        | 18705.4  | 10857.16 | 530677.4 | 98403.16 | 412898.9 |
| 677025.7 | 221967.5 | 1080317  | 1417885  | 531106.7 | 1288924  | 1104684  | 571820.7 | 824002.4 | 353170.8 |

|          |          |          |          |          |          |          |          |          |          |
|----------|----------|----------|----------|----------|----------|----------|----------|----------|----------|
| 736189.1 | 476893.4 | 163932.3 | 217863.1 | 193533.8 | 199700.8 | 132962.4 | 736169.5 | 149150.5 | 384121.3 |
| 822236.5 | 689522.3 | 30842.72 | 37899.62 | 7804.591 | 21219.13 | 8060.167 | 910313.7 | 4913.644 | 262678.4 |
| 714835.1 | 573950.9 | 2379.441 | 14922.18 | 2612.11  | 29716.46 | 205635.7 | 1089709  | 128629   | 468804.2 |
| 3536684  | 402384.3 | 28702.68 | 30465.66 | 87748.16 | 3559592  | 3297527  | 3787268  | 2884524  | 3426926  |
| 2082902  | 1768430  | 8130.513 | 11479.8  | 54090.92 | 15244.77 | 57097.92 | 4183405  | 412323.9 | 1278757  |
| 501332.2 | 270218.3 | 9908.013 | 4388.187 | 12181.86 | 49365.78 | 598181.4 | 709213.6 | 275550.3 | 672969.7 |
| 1089057  | 824714.2 | 55859.82 | 82625.47 | 65384.37 | 265925.4 | 201288   | 1487377  | 65399.67 | 514427.3 |
| 377923   | 290681.3 | 26941.5  | 19939.38 | 136090   | 22525.78 | 7291.557 | 511178.9 | 20761.02 | 116787.6 |
| 5433381  | 1077322  | 2387621  | 3045642  | 3709403  | 5677916  | 4237608  | 5626044  | 4095313  | 4708596  |
| 1518740  | 493345.4 | 69195.37 | 28738.97 | 138931   | 1452718  | 1424841  | 2233601  | 1247092  | 1219303  |
| 32447284 | 4709357  | 21243079 | 22609391 | 22394757 | 35095543 | 24716491 | 35916729 | 25899875 | 32767805 |
| 545251.1 | 99485.62 | 79439.32 | 85304.36 | 120615.4 | 432960.8 | 612138   | 580976.3 | 484234.5 | 417816.5 |
| 301491.4 | 254817.3 | 0        | 0        | 3651.444 | 27193.68 | 0        | 348129.8 | 41409.6  | 105446.2 |
| 1926819  | 1608713  | 15621.13 | 18765.93 | 7706.707 | 191345.7 | 85689.95 | 2268912  | 8693.037 | 524537.7 |
| 164733   | 141633.2 | 0        | 0        | 3471.402 | 0        | 0        | 216874.2 | 0        | 32092.98 |
| 645277.9 | 554554.5 | 2997.761 | 3052.77  | 0        | 9432.093 | 0        | 906187.5 | 133037.6 | 622971.7 |
| 111954   | 79157.09 | 19613.68 | 34485    | 47309.77 | 4404.713 | 0        | 207794.8 | 4999.956 | 64999.78 |
| 1833886  | 901803.5 | 202720.7 | 412776.7 | 499929.8 | 1337382  | 1382614  | 1287344  | 835418   | 1482026  |
| 2980745  | 1695268  | 679663.1 | 888800.6 | 834611.3 | 1586264  | 1176960  | 1351056  | 4243603  | 5051199  |
| 261952.5 | 181347   | 46578.66 | 33275.87 | 34831.56 | 37909.02 | 115753.6 | 368271.6 | 40473.5  | 128915.2 |
| 1355962  | 795565.5 | 406514.3 | 579186.7 | 749017.9 | 410083.2 | 87555.82 | 2005732  | 279345.6 | 792583.9 |
| 2333116  | 1604531  | 426495.3 | 548069   | 478217.5 | 557070.2 | 387367   | 3190849  | 370880.2 | 981870.3 |
| 9313.245 | 18563.53 | 0        | 34411.1  | 183314.2 | 137292   | 187645.5 | 0        | 0        | 4205.703 |
| 372570.8 | 230583.2 | 0        | 0        | 0        | 8348.632 | 410440.7 | 636520.3 | 71281    | 306601.8 |
| 332623.4 | 276068.2 | 10067.71 | 40093.83 | 5061.404 | 8173.739 | 6774.386 | 609959.7 | 7258.408 | 77265.15 |
| 955818.5 | 815992   | 6164.436 | 15793.46 | 8952.848 | 34753.34 | 6155.991 | 1466844  | 67738.36 | 231052.8 |
| 1166933  | 795941.7 | 196354.3 | 232373.4 | 154264.8 | 634806.3 | 75876.4  | 1988115  | 69404.87 | 619384.5 |
| 255026   | 182808.5 | 0        | 0        | 0        | 65915.42 | 166306.5 | 493314.3 | 0        | 261381.1 |
| 152893   | 126454.9 | 3027.7   | 7119.692 | 17545.07 | 4693.115 | 4678.275 | 263346.6 | 3966.962 | 44343.32 |
| 631707.5 | 354888.1 | 218557.6 | 112925   | 185916.8 | 367917.3 | 251627   | 1110940  | 322286.7 | 239703.8 |
| 1243599  | 961842.5 | 124549.9 | 224709.6 | 160400.8 | 151136.9 | 32429.44 | 2442902  | 112504.9 | 634655.4 |
| 27754.48 | 35004.37 | 193255.9 | 271447.7 | 460836.8 | 859895.8 | 90544.04 | 41258.81 | 0        | 5842.188 |
| 32084.58 | 48513.64 | 177176.6 | 260118.3 | 811534.8 | 843724.4 | 112424.5 | 33068.82 | 0        | 0        |
| 150228.4 | 71025.76 | 41411.33 | 37676.84 | 44620.24 | 100677.3 | 116593.6 | 157399.8 | 135230.6 | 66416.94 |
| 2366930  | 765427.5 | 750165   | 1263044  | 1300884  | 2173439  | 1731345  | 1985286  | 1424066  | 2132894  |
| 3450959  | 2766185  | 234414.5 | 263482.2 | 267901.7 | 305065.6 | 296603.8 | 4144171  | 274440.4 | 1343533  |
| 1162747  | 997059.6 | 47869.93 | 34377.06 | 7219.968 | 0        | 0        | 2515752  | 93975.68 | 412876.5 |
| 5789.477 | 5846.24  | 22276.56 | 160895.9 | 133218.9 | 128763.7 | 0        | 0        | 8599.952 | 0        |
| 312439.5 | 268540.7 | 0        | 12069.89 | 3560.081 | 5042.523 | 0        | 496721.7 | 0        | 44438.11 |
| 1530303  | 581427.1 | 682011.5 | 861437.9 | 959878.2 | 777486.4 | 1063709  | 1686878  | 1854872  | 2015306  |
| 1359097  | 992112.7 | 226283.8 | 280427.1 | 281695.5 | 144427.5 | 178631.9 | 2020726  | 61798.66 | 928466.6 |
| 591380.4 | 384861.5 | 113862.9 | 125604.9 | 135036.8 | 282148.3 | 107622.7 | 142149.4 | 584883.1 | 1081509  |
| 10418097 | 8988292  | 102673.1 | 135244.1 | 133084.9 | 159865.8 | 46055.69 | 18212225 | 115071.3 | 3281622  |
| 3103500  | 2454308  | 243150   | 316296   | 295618.3 | 361238.9 | 239772   | 3409627  | 250344.5 | 1056646  |
| 9965181  | 7251232  | 1675576  | 2274720  | 1863595  | 1678669  | 834014.7 | 13705694 | 465389.1 | 4716104  |
| 2765278  | 2111069  | 296243.3 | 333539   | 423790.8 | 399607.3 | 280789.7 | 3936257  | 327604.2 | 875072.5 |
| 7849630  | 6711239  | 145679.6 | 180414.6 | 171628.3 | 183221   | 120557   | 7719036  | 256251.2 | 2788199  |

|          |          |          |          |          |          |          |          |          |          |
|----------|----------|----------|----------|----------|----------|----------|----------|----------|----------|
| 1629447  | 1389369  | 6951.312 | 12050.23 | 4357.166 | 8730.654 | 161333.3 | 3738173  | 177752   | 1041181  |
| 4798930  | 4081529  | 116547   | 106469.6 | 44449.88 | 64703.69 | 296920.1 | 9449122  | 936857.8 | 3278163  |
| 3401591  | 2817749  | 194398.5 | 197057.8 | 158513.6 | 291007.8 | 58663.99 | 2442975  | 370546   | 1519924  |
| 489589.2 | 384305.5 | 17746.45 | 26252.63 | 72559.2  | 24491.52 | 114872.4 | 948886.3 | 108378.3 | 456961   |
| 4842050  | 4070929  | 10108.4  | 2944.623 | 82152.81 | 436423.4 | 421813.2 | 7533509  | 832629.5 | 3659527  |
| 244800.7 | 85877.99 | 9979.118 | 14096.88 | 42557.58 | 186927.7 | 265312.7 | 336249.7 | 197203.1 | 209606.2 |
| 82284.64 | 66298.17 | 0        | 3550.293 | 9694.18  | 0        | 20862.57 | 146272.8 | 16219.66 | 7102.335 |
| 857289.8 | 427232.3 | 169860.6 | 149614.1 | 216301.3 | 649741.6 | 618042.5 | 1005758  | 766212.2 | 270691   |
| 128058.5 | 104645.3 | 16722.35 | 7870.287 | 6656.727 | 12379.8  | 0        | 95229.09 | 0        | 94562.43 |
| 701252.9 | 410227.4 | 5781.488 | 5996.932 | 3497.254 | 116228.5 | 788831.7 | 841652.9 | 494964.7 | 1047288  |
| 2434290  | 2069302  | 44638.68 | 43430.32 | 48195.95 | 186399.4 | 50111.49 | 1393059  | 313396.7 | 1400589  |
| 188431.9 | 143075.7 | 3113.561 | 3624.804 | 4219.102 | 12449.08 | 111178.8 | 278875.2 | 244449.8 | 340140.9 |
| 3380608  | 2810147  | 263342.7 | 282755.4 | 248964.4 | 56368.67 | 33013.89 | 310251.5 | 5820291  | 4245501  |
| 240973.1 | 125524.1 | 0        | 4480.79  | 0        | 0        | 306150.8 | 350572   | 58194.1  | 264554.2 |
| 737509.8 | 119541.6 | 577636.8 | 474925.4 | 576293.8 | 739663.6 | 577465.1 | 731839.9 | 645293.5 | 646739.7 |
| 491264.3 | 214675.9 | 205233.2 | 166748.4 | 194636.7 | 135011.3 | 485519.4 | 565641.6 | 622582.6 | 234596   |
| 764354.2 | 470897.4 | 221274.4 | 296346.9 | 242722.8 | 274221.7 | 115253.2 | 1233310  | 179471   | 358010.2 |
| 263250.9 | 110295.7 | 222393.3 | 430750.9 | 453961.1 | 757581.6 | 730221.7 | 168720.5 | 149715.1 | 380673.1 |
| 91933.95 | 34854.98 | 119207.4 | 140103   | 115155.5 | 221177.5 | 133589.1 | 152217.9 | 78369.01 | 68806.15 |
| 346818.9 | 42826.33 | 547242.6 | 643068.7 | 677837.3 | 584887.2 | 247462.1 | 342902.3 | 347981.9 | 277947.7 |
| 406110.4 | 255853.1 | 137684.1 | 120971.9 | 126469.7 | 138447.2 | 55717.63 | 563678.8 | 30574.08 | 247611.4 |
| 289555.4 | 254377.2 | 0        | 0        | 0        | 0        | 0        | 438572.1 | 0        | 37983.92 |
| 454882   | 387147.9 | 2726.997 | 0        | 23441.41 | 0        | 46137.71 | 542065.5 | 39184.89 | 62574.94 |
| 1155790  | 340764.2 | 366349.3 | 769419.8 | 543525.9 | 1061405  | 908253.4 | 1007613  | 782792.8 | 958711.5 |
| 742665   | 409256.9 | 50993.98 | 68244.7  | 160615.7 | 463255.3 | 592525.3 | 490224.8 | 329075   | 552015.7 |
| 718756.5 | 411608.1 | 10382.97 | 0        | 8384.779 | 16353.59 | 860393.8 | 1047628  | 38499.91 | 663194.1 |
| 293796.8 | 236914.5 | 1268379  | 1122819  | 2734668  | 5211766  | 1135905  | 423559.3 | 124302.8 | 117195.3 |
| 7330948  | 5797900  | 203164.1 | 276486.4 | 345665.2 | 1533000  | 1437228  | 7740950  | 421111.1 | 2634476  |
| 217572.2 | 183665.9 | 7029.996 | 6440.362 | 14725.07 | 0        | 16766.08 | 475030   | 42671.59 | 90527.89 |
| 742335.3 | 629206.7 | 14223.23 | 32155.71 | 17736.17 | 54500.42 | 20806.76 | 964958   | 8692.892 | 198447.6 |
| 82622.02 | 69138.95 | 5400.925 | 3424.951 | 12995.66 | 0        | 0        | 84747.71 | 0        | 53724.8  |
| 2057084  | 1612309  | 5762950  | 4230278  | 9035421  | 1374266  | 5957389  | 2127793  | 0        | 4502165  |
| 585008.4 | 253186.9 | 237313.4 | 279098   | 474754.7 | 117281.4 | 372084   | 854633.4 | 265026.4 | 765609.4 |
| 770160.9 | 517193.5 | 118572.9 | 84781.76 | 123008.9 | 229748.1 | 393083.3 | 1162146  | 360465.9 | 574115.9 |
| 484936.4 | 417510.2 | 2725.692 | 4664.477 | 6086.303 | 28257.62 | 22326.9  | 342422.2 | 37895.57 | 236822.3 |
| 89720.54 | 71825.02 | 28599.44 | 5790.998 | 2801.472 | 0        | 7166.538 | 98903.76 | 4557.475 | 67266.4  |
| 2941585  | 2265559  | 427925.1 | 492006.7 | 405726.5 | 456722.5 | 132356.9 | 2247105  | 473166.5 | 1543335  |
| 653613   | 452434.3 | 2491.95  | 0        | 0        | 76180.35 | 592670.9 | 659719.4 | 53215.99 | 375779.4 |
| 1914361  | 1453982  | 314533.2 | 124668.2 | 209359.5 | 561564.1 | 173817.4 | 3791242  | 272507   | 900419.1 |
| 96455.4  | 129826.7 | 303591.9 | 252536.3 | 241347.7 | 554048.9 | 121140.8 | 76082.71 | 9748.318 | 18556.19 |
| 1198059  | 633304.3 | 58190.67 | 41915.27 | 46615.55 | 240069.8 | 1428472  | 2168182  | 1158370  | 1219941  |
| 13137540 | 10987034 | 158832.9 | 139402   | 82662.19 | 1702422  | 1676852  | 7469806  | 10093409 | 10657773 |
| 2437582  | 1962689  | 8035.25  | 38834.92 | 7489.112 | 288003   | 832454.7 | 2789582  | 330951.1 | 1792328  |
| 24269.11 | 41950.99 | 67501.85 | 73481.7  | 182497.1 | 256175.8 | 48269.48 | 24464.23 | 0        | 0        |
| 6381474  | 4150744  | 139646.5 | 895128.7 | 3323181  | 1025931  | 3322470  | 11458104 | 632122.8 | 4153890  |
| 16407478 | 8686692  | 3909.048 | 15610.31 | 50325.31 | 592763.9 | 20800467 | 22832449 | 1487067  | 21605119 |
| 1693270  | 1370063  | 133816.7 | 190919.7 | 152441.7 | 184191   | 82852.5  | 2149504  | 136987.6 | 530524.1 |

|          |          |          |          |          |          |          |          |          |          |
|----------|----------|----------|----------|----------|----------|----------|----------|----------|----------|
| 90388.84 | 80168.46 | 0        | 0        | 0        | 0        | 0        | 97554.79 | 0        | 22425.97 |
| 100645.5 | 88160.69 | 0        | 0        | 0        | 0        | 6369.318 | 87878.98 | 8402.413 | 35202.9  |
| 604633.7 | 336986.7 | 11873.37 | 4004.82  | 0        | 21717.67 | 741908.3 | 971755.6 | 94079.13 | 476631.3 |
| 1514921  | 782138.4 | 252435.4 | 195951.5 | 152397.2 | 1698863  | 386254.1 | 2051793  | 761587.1 | 565687.5 |
| 141070.4 | 67542.63 | 45408.71 | 104065.4 | 7218.254 | 69158.19 | 92849.6  | 259392.4 | 109032.1 | 123844.4 |
| 716804.1 | 633092.9 | 0        | 9776.882 | 0        | 0        | 12487.93 | 1477773  | 4552.553 | 228653.8 |
| 23802.78 | 12576.83 | 125199.6 | 55969.65 | 226460.7 | 81355.79 | 43812.41 | 39139.56 | 19931.64 | 9880.351 |
| 3403113  | 2952419  | 3057.119 | 33601.07 | 31379.94 | 238385.3 | 117329.2 | 2979732  | 86067.52 | 1286008  |
| 1669965  | 1170908  | 0        | 9565.78  | 6477.553 | 86995.79 | 1543532  | 2062786  | 77017.6  | 1493427  |
| 83425.29 | 15260.8  | 88544.67 | 451334.6 | 435417.5 | 716411.5 | 151352.5 | 69570.65 | 86071.63 | 101264.2 |
| 1267174  | 631207.4 | 164558.9 | 332135.3 | 324733   | 1003698  | 885714.3 | 906138.5 | 635788.8 | 955245.4 |
| 119076.2 | 37481.29 | 113576.9 | 167112.8 | 199409.6 | 203072.7 | 160248   | 80484.67 | 134347.6 | 77516.73 |
| 4742666  | 3956136  | 230608.8 | 274536.4 | 253521.2 | 606641.2 | 135282.3 | 6874161  | 175355.9 | 1491002  |
| 265564.3 | 233553.7 | 5142.866 | 3100.394 | 0        | 0        | 8513.949 | 322629.4 | 0        | 42441.87 |
| 15242.89 | 25175.8  | 69608.18 | 195443.5 | 334425.5 | 638348.6 | 117750.5 | 9228.542 | 0        | 7336.811 |
| 369276.6 | 240714.2 | 54023.17 | 3175.145 | 50420.33 | 304013.8 | 80584.35 | 690712.3 | 163077.5 | 346014.8 |
| 282213.2 | 35501.59 | 0        | 6041.034 | 42028.62 | 0        | 397242.9 | 268780.8 | 310301.6 | 256250.5 |
| 688600.9 | 415826.8 | 0        | 3803.513 | 0        | 26495.11 | 801638.1 | 1075322  | 26481.79 | 872834   |
| 409543.2 | 303868.7 | 86859.29 | 111598.4 | 68649.21 | 60743.51 | 19506    | 819244.3 | 52431.7  | 189267.9 |
| 84918.4  | 58801.64 | 24779.45 | 28170.65 | 17851.55 | 7395.227 | 17691.82 | 119345.6 | 6208.449 | 46848.66 |
| 280264.9 | 249389.1 | 0        | 3393.365 | 0        | 0        | 0        | 349374.2 | 0        | 37784.12 |
| 2579562  | 2130417  | 173004.5 | 204282.3 | 202878.1 | 140247.2 | 238246.1 | 1911144  | 352967.4 | 1158226  |
| 523657.7 | 330785.1 | 201115.5 | 238832.1 | 206725.8 | 85127.52 | 47487.58 | 408343.4 | 216094.9 | 1084988  |
| 1373999  | 1116088  | 149707.2 | 192739.1 | 151136.3 | 90593.37 | 35115.14 | 1892393  | 69131.62 | 281199.3 |
| 1046268  | 928985.3 | 7664.816 | 2712.734 | 6608.112 | 0        | 10181.83 | 2319600  | 19737.45 | 414020.2 |
| 5219572  | 4509013  | 226363.6 | 184664.5 | 278227   | 24272.3  | 134996.9 | 114906.8 | 7839140  | 5305184  |
| 1678000  | 1003334  | 133500.6 | 53758.21 | 368734.5 | 1144287  | 1041014  | 2891731  | 354060.4 | 1129863  |
| 167670.5 | 143966.2 | 0        | 6537.952 | 4773.804 | 0        | 21669.7  | 342707.5 | 0        | 68039.61 |
| 46323.92 | 22357.68 | 60901.4  | 101637.5 | 141169.4 | 282844.6 | 115571.1 | 42024.13 | 27777.52 | 33631.67 |
| 779517   | 256950.9 | 234554.6 | 434164.6 | 476674.5 | 671453.6 | 588923.2 | 744179.3 | 468971.5 | 634032.6 |
| 6382063  | 5558769  | 139188.6 | 136048.2 | 177423.4 | 206568.4 | 142253.5 | 1192623  | 15106012 | 7253737  |
| 1425948  | 1093538  | 271886.3 | 337587.9 | 247092   | 102014.6 | 65221.37 | 1786008  | 80378.9  | 483860.3 |
| 2320254  | 1353447  | 180227.3 | 138945.8 | 149853.3 | 360459.2 | 2559527  | 3586337  | 326251.6 | 1593016  |
| 8434.983 | 8796.126 | 327285.7 | 492161   | 641624.4 | 1396799  | 33586.71 | 10097.16 | 0        | 0        |
| 3999175  | 2167006  | 143621   | 126476.1 | 231967.9 | 3459849  | 2937609  | 5098209  | 747108.8 | 2865614  |
| 1518230  | 1359834  | 0        | 0        | 0        | 0        | 0        | 2991014  | 26576.64 | 652335.1 |
| 1490629  | 1172710  | 0        | 2735.572 | 14509.99 | 138547.7 | 808157.6 | 2927967  | 360063   | 1631811  |
| 1436788  | 711012.9 | 309298.6 | 92201.3  | 390655.8 | 361498   | 1605006  | 2232938  | 1864575  | 578119.6 |
| 59854.43 | 52123.28 | 4660.348 | 0        | 3896.128 | 0        | 0        | 68237.2  | 0        | 12077.91 |
| 188685.3 | 168807.6 | 684433.8 | 725428.4 | 1861923  | 3247673  | 692056.9 | 293489.6 | 68516.22 | 44541.07 |
| 5763861  | 5115679  | 29833.59 | 55804.17 | 56394.26 | 116720.3 | 36698.53 | 6203569  | 8361.183 | 1257718  |
| 773975.8 | 684092.8 | 21902.05 | 0        | 2971.35  | 7458.401 | 24107.87 | 1577216  | 39201.41 | 343456.4 |
| 1944819  | 391882.9 | 1168526  | 649339.4 | 1069147  | 2088736  | 1538961  | 1913000  | 1522687  | 1852416  |
| 5212768  | 3700552  | 283226.7 | 486959.6 | 438077.2 | 2549472  | 1860802  | 1300596  | 9941527  | 7928945  |
| 459423.8 | 408132.1 | 2837.124 | 4060.513 | 4073.325 | 0        | 12637.41 | 1047015  | 55314.63 | 186171.3 |
| 7604195  | 2814769  | 1301809  | 3025751  | 2832831  | 6752198  | 6501211  | 6531309  | 4060040  | 6836108  |
| 325498.9 | 241661   | 3343.547 | 0        | 24044.88 | 128945.7 | 136733.4 | 539129.6 | 37149.51 | 197297.8 |



|          |          |          |          |          |          |          |          |          |          |
|----------|----------|----------|----------|----------|----------|----------|----------|----------|----------|
| 1145685  | 578171.7 | 3469.135 | 13563.77 | 36349.14 | 52174.62 | 1488670  | 1546306  | 123609.4 | 1308071  |
| 702563.2 | 619791.5 | 0        | 7487.486 | 0        | 14303.83 | 44124.11 | 1300623  | 135337.7 | 666398.1 |
| 5035466  | 3487423  | 1323462  | 1491971  | 1186120  | 1435345  | 398102.2 | 4369581  | 766735.6 | 3031205  |
| 92456.1  | 133903.2 | 330902.8 | 2728447  | 1384527  | 3596876  | 412401.4 | 16290.4  | 55117.49 | 30061.79 |
| 424686.8 | 89012.03 | 153759.9 | 358377.4 | 308403.6 | 377841.6 | 330780.7 | 433524.6 | 320811   | 360311.3 |
| 1359467  | 226641.4 | 950847.3 | 1147692  | 1115316  | 1292611  | 1003371  | 1408902  | 1018336  | 1262149  |
| 33659.5  | 13058.95 | 177095.2 | 277231.1 | 150737.1 | 85654.98 | 17968.14 | 53266.73 | 34904.45 | 16679.23 |
| 37805402 | 33292484 | 2038574  | 745703.2 | 327791.5 | 389306.4 | 944610.4 | 79374520 | 62340497 | 11827753 |
| 6938018  | 7939570  | 39363144 | 29961451 | 75055562 | 9668135  | 19189625 | 12715901 | 1496392  | 699133.4 |
| 2443882  | 2192765  | 9956.219 | 12503.45 | 15267.3  | 21741.86 | 4632.835 | 2644469  | 0        | 441827.2 |
| 278324.4 | 100007.8 | 110181.1 | 158799.9 | 144467.8 | 76381.59 | 290519.7 | 335795.1 | 122373.2 | 233085.2 |
| 2.64E+08 | 1.63E+08 | 2166800  | 1842151  | 4358495  | 1.57E+08 | 2.19E+08 | 4.69E+08 | 2.28E+08 | 2.63E+08 |
| 974519   | 597546.6 | 152980.5 | 46599.39 | 154283.1 | 780380.8 | 414917.1 | 1672089  | 403012.5 | 879076.5 |
| 4917243  | 4204378  | 46074.96 | 27651.72 | 55331.07 | 636042.9 | 565684.4 | 2614489  | 3917334  | 3657082  |
| 537857   | 452562.1 | 2912.761 | 8226.266 | 6886.386 | 109243.1 | 61618.37 | 1038094  | 28146.64 | 118974.8 |
| 209680.1 | 108914.7 | 10541.75 | 2983.731 | 9905.326 | 14119.06 | 266164.2 | 330505.8 | 76060.5  | 128357   |
| 2307562  | 1935582  | 12580.71 | 0        | 28777.69 | 95969.08 | 738244.1 | 3927304  | 491907.8 | 1609163  |
| 13808.93 | 12482.78 | 53043.15 | 420205.1 | 200382.5 | 239131   | 29601.34 | 13706.61 | 34087.64 | 9888.901 |
| 744834.6 | 664708.7 | 0        | 0        | 9824.367 | 8749.321 | 30825.09 | 1049208  | 96978.27 | 546829   |
| 177876.6 | 53081.53 | 43250.94 | 186208.7 | 25963.02 | 90383.37 | 139978.3 | 148990.2 | 127048.5 | 256962.1 |
| 997529.2 | 479346.3 | 175304.6 | 233842.6 | 233784.8 | 812660.1 | 767438.8 | 908201.4 | 394072.9 | 776059.2 |
| 11701607 | 2377651  | 6383548  | 8698788  | 7940216  | 11350802 | 9786559  | 10976562 | 9545513  | 11796264 |
| 1451734  | 1288081  | 6580.127 | 3178.129 | 109091.5 | 15582.81 | 5801.607 | 2907164  | 242703.8 | 1470881  |
| 291181.2 | 88956.81 | 457013.6 | 520742.6 | 510833.5 | 458775.8 | 224035.2 | 262126.3 | 379620.7 | 283462   |
| 367385.7 | 270109.5 | 57301.76 | 61453.19 | 54069.54 | 119023.3 | 55616.75 | 264231.8 | 59956.44 | 239338.8 |
| 163086.1 | 146142.3 | 0        | 0        | 3989.909 | 0        | 5844.421 | 363798.1 | 11766.04 | 72859.45 |
| 1033388  | 809385.2 | 128087.4 | 182397.7 | 158091   | 234424.4 | 10571.32 | 1912024  | 57129.72 | 451441.2 |
| 138991   | 114716.7 | 10627.29 | 8461.708 | 7744.173 | 14060.46 | 22205.2  | 117067.5 | 17188.05 | 55045.83 |
| 2559416  | 1746575  | 2991.174 | 3628.608 | 0        | 16126.97 | 2664655  | 5046792  | 115550.7 | 2492608  |
| 1675526  | 422625.3 | 1012990  | 1311518  | 1213704  | 950593.2 | 1525805  | 2132933  | 1198856  | 1485034  |
| 4153923  | 2147382  | 830705.2 | 314155.5 | 1147104  | 4238975  | 1673024  | 6421939  | 1815949  | 3719282  |
| 1519808  | 1293089  | 0        | 0        | 0        | 0        | 517817   | 3271255  | 0        | 793413.1 |
| 1342028  | 708930.4 | 752183.1 | 610014.7 | 377174.1 | 791696.7 | 313435.8 | 2412300  | 609800.4 | 790221.7 |
| 6025087  | 5321776  | 222136.5 | 211479.3 | 188833.7 | 184156.1 | 75298.18 | 7003678  | 1185696  | 4239173  |
| 317276.4 | 255456.5 | 49335.27 | 18032.21 | 43861.35 | 32625.95 | 39471.11 | 163724.8 | 46995.53 | 199179.7 |
| 1324419  | 1026977  | 0        | 3442.031 | 0        | 14644.51 | 979317.7 | 3018288  | 358221.6 | 683623.3 |
| 2059191  | 1865175  | 4092.18  | 5450.471 | 0        | 14980.33 | 30908.03 | 3608053  | 44154.81 | 628834.5 |
| 271019.1 | 168028.6 | 457242.4 | 582052.6 | 503511.4 | 424268.9 | 327081.8 | 182674.6 | 350713.7 | 66653.11 |
| 150275.8 | 62003.19 | 441883.5 | 259911.5 | 415295.8 | 283964.3 | 101078.9 | 148700.9 | 67006.83 | 127086.1 |
| 329214.6 | 232788.3 | 3499.965 | 4579.934 | 3994.92  | 65398.42 | 280939.3 | 303209.9 | 29127.72 | 214756.6 |
| 6787291  | 2405512  | 1343140  | 2712849  | 2795465  | 6656458  | 5313032  | 5558003  | 3643993  | 6573491  |
| 2143749  | 1803900  | 88915.41 | 138621.9 | 85898.48 | 476795.7 | 55901.23 | 2129331  | 90130.94 | 629133.7 |
| 1154397  | 672823.4 | 367641.3 | 486847.9 | 470636.8 | 435725   | 331090.5 | 1546635  | 408377.5 | 442380.6 |
| 10322.28 | 7506.333 | 36212.43 | 382621.6 | 117005.4 | 420998.1 | 80920.36 | 0        | 5275.978 | 17955.81 |
| 127303.9 | 116256.5 | 0        | 0        | 0        | 0        | 0        | 150855   | 0        | 16637.94 |
| 991729.5 | 744321.5 | 72498.26 | 105047.3 | 112807.3 | 329828.5 | 280620.2 | 1395813  | 29516.71 | 474365.3 |
| 28670.5  | 17896.74 | 104571.6 | 105179.7 | 58504.85 | 207288.9 | 31644.22 | 0        | 31134.17 | 38474.42 |

|          |          |          |          |          |          |          |          |          |          |
|----------|----------|----------|----------|----------|----------|----------|----------|----------|----------|
| 252708.8 | 201567.7 | 5067.265 | 2348.552 | 10474.06 | 93613.56 | 55230.3  | 231885.6 | 548894.1 | 330088.1 |
| 1487733  | 1245728  | 29475.43 | 32755.91 | 35743.1  | 261441.5 | 279368.2 | 792481.5 | 259569.1 | 789586.6 |
| 807136.7 | 636624.9 | 117277.9 | 159643.9 | 124066.5 | 98959.95 | 56545.74 | 1542391  | 46092.88 | 305223.9 |
| 198490.2 | 168696.3 | 17771.7  | 12592.19 | 6894.261 | 33624.61 | 0        | 337618.1 | 0        | 33076.94 |
| 7106698  | 4380121  | 512770.8 | 353909.8 | 1581957  | 4942809  | 4100649  | 12296038 | 1411351  | 4437189  |
| 96725.02 | 41588.13 | 66810.92 | 292295.9 | 343761.1 | 274587.1 | 136615.9 | 49577.51 | 119790   | 155195.9 |
| 512628   | 221012.2 | 594192.5 | 753770.8 | 650553.9 | 1043092  | 851117.6 | 864335   | 457088.2 | 470815.7 |
| 1248957  | 841145.9 | 133525.2 | 106415.2 | 179427   | 785618.7 | 473665.1 | 1428125  | 175099.3 | 720729.4 |
| 390150.6 | 331005.1 | 28122.11 | 9199.34  | 24725.82 | 39463.34 | 41087.85 | 672050.6 | 42210.59 | 166996.2 |
| 13286413 | 11899893 | 206669.1 | 232282.5 | 311426.7 | 498666.4 | 162550.1 | 8035014  | 2083120  | 6174431  |
| 780467.5 | 401559.8 | 82890.77 | 94267.62 | 247688.9 | 570425.5 | 625066.1 | 534663.3 | 344904.5 | 622845   |
| 708625.9 | 619089   | 21407.45 | 25446.19 | 19740.42 | 79487.26 | 16936.76 | 727699.9 | 19833.21 | 327546.1 |
| 687108.5 | 620029.5 | 5830.431 | 9750.628 | 11523.12 | 16825.22 | 5446.44  | 1498375  | 16692.68 | 251148.3 |
| 2125864  | 1580788  | 406381   | 434217.7 | 400729.7 | 524436.9 | 237833.3 | 2362681  | 314075.5 | 852893.9 |
| 322182.4 | 290414.8 | 2776.563 | 0        | 3155.881 | 0        | 20056.08 | 420897.2 | 55043.01 | 294498.5 |
| 851256.9 | 717158.6 | 14524.78 | 7449.198 | 16588.76 | 115552.4 | 196677.9 | 981412.2 | 112166.9 | 479017.1 |
| 1002141  | 908664.6 | 0        | 0        | 28142.97 | 7468.279 | 19237.58 | 1652481  | 304325.9 | 806207.6 |
| 4154180  | 3007691  | 69439.47 | 44980.63 | 1254195  | 1200593  | 1921339  | 6119226  | 11890.21 | 3987357  |
| 876141.1 | 578101.3 | 120852.9 | 133537.9 | 85939.79 | 129404.9 | 744269.2 | 1505343  | 123587.8 | 481749   |
| 462096.5 | 417860   | 0        | 0        | 23062.97 | 4037.331 | 8048.959 | 1127544  | 47161.14 | 452778.2 |
| 164301.7 | 148917.7 | 2676.768 | 2465.794 | 0        | 5962.329 | 0        | 82537.64 | 6663.218 | 199503.5 |
| 2018502  | 1422272  | 432290.2 | 580089   | 516613.2 | 574339.4 | 262095.2 | 2824273  | 64988.82 | 945978.2 |
| 507524.5 | 370250.1 | 48476.82 | 52445.58 | 55236.27 | 108368.1 | 272437   | 543364.6 | 22824.94 | 255524.5 |
| 361429.3 | 320350.9 | 0        | 0        | 3939.521 | 0        | 62963.98 | 392562.6 | 38857.8  | 230667.5 |
| 1186483  | 328115.5 | 1701284  | 2148540  | 1914297  | 2174071  | 912033.4 | 897840.9 | 1103987  | 867029.4 |
| 19603.4  | 31314.77 | 96910.99 | 884214.8 | 334093.2 | 1026634  | 121295.3 | 0        | 4593.135 | 9506.572 |
| 77240.22 | 57493.98 | 110524.2 | 101495.4 | 187664   | 262085.9 | 402849.1 | 130064.1 | 11230.21 | 42241.07 |
| 114638.5 | 100451.9 | 2878.88  | 0        | 3756.884 | 7424.925 | 13299.58 | 60054.72 | 9281.193 | 97327.28 |
| 16658.73 | 15153.88 | 119023.4 | 67349.97 | 147980.1 | 323563.2 | 34728.47 | 43115.69 | 4879.556 | 13534.92 |
| 4660627  | 3011940  | 10906.06 | 0        | 35705.08 | 368809.4 | 5188553  | 5279056  | 213447.5 | 5185615  |
| 3747268  | 2508413  | 1067118  | 301111.1 | 580014.1 | 709560   | 2533999  | 5459579  | 7200475  | 2325568  |
| 8557.232 | 5844.956 | 65379.66 | 123783.3 | 276717.2 | 401252.2 | 26387.99 | 13694.71 | 4999.183 | 0        |
| 111272.5 | 100185.3 | 0        | 3607.968 | 0        | 4758.826 | 3956.494 | 154302.2 | 0        | 23024.21 |
| 233194.6 | 156904.2 | 13404.24 | 4554.768 | 7232.466 | 74470.73 | 202049.6 | 427999.1 | 120865.3 | 101417.4 |
| 1150755  | 1025840  | 22243.75 | 15221.55 | 13315.44 | 89680.16 | 44930.65 | 1414686  | 75019.43 | 574417.6 |
| 639562.5 | 307519.2 | 5844385  | 1276900  | 5021396  | 1908923  | 1159120  | 899186.3 | 958997.5 | 573163.8 |
| 117303.7 | 108134.8 | 0        | 0        | 0        | 0        | 0        | 119815.7 | 0        | 23647.14 |
| 929422.9 | 553245.2 | 255663.7 | 360821   | 350844.9 | 422389.7 | 264631   | 1394334  | 402082.4 | 368152.6 |
| 1792490  | 1606537  | 3411.048 | 19015.51 | 15869.09 | 107609.3 | 111386.1 | 899459   | 316401.1 | 923466.8 |
| 107588.2 | 40499.35 | 165950.8 | 245604.8 | 213735.9 | 164716.3 | 88114.66 | 48714.85 | 119780.3 | 85701.53 |
| 2478665  | 2287693  | 0        | 0        | 0        | 0        | 0        | 2912133  | 6273829  | 696493.6 |
| 613247.3 | 377031.2 | 155140.7 | 239643.3 | 190121   | 275237.1 | 170478.3 | 881329   | 109998.5 | 308708.3 |
| 7758018  | 4682634  | 1151174  | 527354.9 | 3217817  | 1249021  | 6856877  | 13925716 | 2508584  | 3844818  |
| 137560.1 | 68892.93 | 0        | 5261.893 | 0        | 114065.9 | 128637.8 | 94234.49 | 112316.2 | 135962.1 |
| 996471.4 | 515278.2 | 73491.17 | 199331.6 | 254695.1 | 716629.2 | 828719.1 | 719242.1 | 441321   | 731779   |
| 2656744  | 2434362  | 7534.411 | 15295.31 | 8769.968 | 41792.29 | 47320.2  | 4896261  | 101237.6 | 850645.9 |
| 80988.35 | 38917.2  | 103487.3 | 372102.7 | 405490.9 | 722272.3 | 139988.5 | 21095.66 | 118867.5 | 66136.79 |

|          |          |          |          |          |          |          |          |          |          |
|----------|----------|----------|----------|----------|----------|----------|----------|----------|----------|
| 1943142  | 1451972  | 330246.4 | 445924.7 | 404693.8 | 407421.1 | 287854.2 | 1934806  | 319266.2 | 780894.2 |
| 8349073  | 1567120  | 4319289  | 5910092  | 6619422  | 8350092  | 6674540  | 7866766  | 6942358  | 7550398  |
| 704379.2 | 462091.2 | 54515.17 | 87384.31 | 119927   | 312126.6 | 465469.2 | 549955.8 | 177978.6 | 1364575  |
| 78818.15 | 23282.7  | 138667.9 | 171441.9 | 170891.5 | 79106.61 | 82421.24 | 86914.69 | 100035.5 | 38955.55 |
| 410382.2 | 377403.5 | 6444.343 | 0        | 6599.235 | 3619.629 | 0        | 1009203  | 12938.96 | 219349.2 |
| 238735.3 | 212665.3 | 0        | 0        | 9070.363 | 0        | 39521.4  | 0        | 182747.8 | 95337.06 |
| 103575.7 | 96113.52 | 0        | 0        | 0        | 0        | 0        | 157959.4 | 24930.56 | 0        |
| 220830.2 | 140287.3 | 16724.95 | 18618.62 | 38938.33 | 74391.52 | 190886.1 | 346381.7 | 76234.74 | 92884.65 |
| 2954745  | 2743533  | 0        | 0        | 0        | 0        | 0        | 5735413  | 4619126  | 0        |
| 325381.6 | 295982.5 | 6623.215 | 3525.439 | 11277.02 | 5773.944 | 6452.95  | 559789.5 | 0        | 172963.5 |
| 12070381 | 4289566  | 1894327  | 1371075  | 4568281  | 11868215 | 10621765 | 13739731 | 18411063 | 8871321  |
| 5439010  | 4304943  | 75143.32 | 270234.2 | 207748.9 | 1206023  | 2398149  | 2546270  | 11246221 | 8789951  |
| 86976.47 | 57038.11 | 183090.2 | 104483.3 | 220012.4 | 92608.89 | 244746.8 | 144891.1 | 31085.12 | 52664.63 |
| 3187844  | 2627884  | 271826.9 | 360613.2 | 341237.1 | 419381.7 | 412977.3 | 3395443  | 126665.9 | 1041406  |
| 517800.4 | 487115.6 | 2844389  | 1987209  | 2805598  | 191674.3 | 987738.7 | 1375151  | 448573.2 | 218655.6 |
| 2872772  | 972276.4 | 1746791  | 2215256  | 2057438  | 1234891  | 1900149  | 4055329  | 1879854  | 2655087  |
| 6115251  | 2475486  | 722246.5 | 269999.9 | 1323416  | 6095945  | 5235950  | 8744013  | 4657556  | 4839251  |
| 1861207  | 1501048  | 226629   | 295153   | 300470.1 | 313373.5 | 113791.1 | 3402821  | 188222.5 | 619434.1 |
| 2391078  | 2094782  | 124923.6 | 201975.1 | 166008.4 | 189526.5 | 26376.33 | 2147388  | 123076.8 | 918344.2 |
| 515390.2 | 449834.1 | 0        | 2369.363 | 21204.59 | 32709.83 | 108762.3 | 1195530  | 210086.9 | 481753.3 |
| 18871891 | 7060184  | 4480879  | 9218394  | 7954803  | 17762323 | 14093132 | 14834240 | 10753901 | 16824438 |
| 452983   | 407259.4 | 13679.45 | 25434.09 | 10198.56 | 18622.84 | 10805.31 | 438538.1 | 0        | 104336.6 |
| 14900.78 | 13696.61 | 286799   | 158959.4 | 410671.7 | 48554.02 | 32292.81 | 35873.14 | 0        | 19152    |
| 5712477  | 4634353  | 966819.9 | 1007238  | 469208.3 | 702304.2 | 595392   | 5657742  | 4247504  | 2112143  |
| 701077.8 | 653667.5 | 0        | 0        | 0        | 3825.3   | 0        | 1406913  | 10880.98 | 272742.8 |
| 288076.2 | 196098.3 | 29699.77 | 26501.58 | 24966.24 | 182287   | 130980.4 | 239776.9 | 50695.66 | 234725.4 |
| 287480.1 | 255839.6 | 0        | 4839.384 | 20836.58 | 7811.693 | 34593.24 | 674561.3 | 18018.96 | 117440.5 |
| 88634675 | 63120622 | 37330697 | 65510974 | 151386.3 | 267354.3 | 354536.9 | 441820.5 | 67921536 | 99606664 |
| 97723.31 | 62860.23 | 5697.561 | 0        | 10715.03 | 58269.94 | 72538.01 | 82880.25 | 14674.07 | 72153.61 |
| 23327491 | 20591631 | 942214.4 | 465413.8 | 1632179  | 725595.7 | 2791357  | 20470855 | 54053704 | 9853049  |
| 2750819  | 298907.6 | 1703885  | 2089234  | 2410627  | 2800505  | 2400174  | 2875917  | 2294591  | 2612110  |
| 542934.5 | 246253   | 166074.9 | 92004.6  | 229490.3 | 438125.9 | 422507   | 386084.3 | 287328.1 | 428316.3 |
| 1059431  | 881037.4 | 62472.98 | 114037.1 | 72360.05 | 137595.2 | 208667.7 | 499335.6 | 2355359  | 1564338  |
| 10920.14 | 16926.69 | 63807.23 | 113958   | 260521.9 | 0        | 128572.8 | 40523.95 | 6320.323 | 7756.44  |
| 7606595  | 5127483  | 639463.3 | 1759727  | 1280121  | 4944267  | 2232080  | 5413052  | 1306877  | 5789604  |
| 26822.83 | 10506.05 | 297344.4 | 489484.6 | 261049.4 | 51170.48 | 37768.81 | 13955.35 | 39402.94 | 23228.87 |
| 1881340  | 1673702  | 87099.51 | 114157.9 | 96285.94 | 138512.2 | 54948.8  | 2005483  | 122510.3 | 336242   |
| 198132.3 | 151505   | 10805.93 | 3899.373 | 0        | 36622.2  | 135337.7 | 221559.4 | 71010.4  | 54230.54 |
| 752880.3 | 248240.2 | 111642.9 | 446550.5 | 175862   | 782955.8 | 553126.3 | 735338.5 | 435755.7 | 597774.8 |
| 963343.1 | 309107.2 | 101460.3 | 192483.8 | 212852.1 | 1035659  | 834587.4 | 946845.6 | 531550.3 | 830000.9 |
| 141317.1 | 56938.91 | 221649.1 | 275012.3 | 277283.1 | 742851.6 | 316277.8 | 65585.8  | 145214.3 | 119365.9 |
| 510328.3 | 402727.3 | 45916.58 | 8949.407 | 54334.31 | 162937   | 144705.9 | 768354.7 | 169619.1 | 370820.9 |
| 174334.6 | 154384.6 | 4808.881 | 2638.747 | 16000.89 | 28173.68 | 0        | 107182.5 | 10100.08 | 83397.54 |
| 2975914  | 1299983  | 340510.5 | 813799.6 | 1007174  | 2498902  | 2605122  | 2344409  | 1489262  | 2359798  |
| 636666.7 | 511028.6 | 107813.2 | 149182.1 | 114829   | 77349.14 | 22132.7  | 988694.8 | 32918.2  | 140910.1 |
| 193401   | 133999.8 | 53103.14 | 31240.89 | 41569.3  | 78526.31 | 52576.07 | 290288.8 | 35053.68 | 84897.27 |
| 1871.949 | 4185.805 | 109935.6 | 425019.2 | 212807.3 | 112310.1 | 0        | 0        | 0        | 0        |

|          |          |          |          |          |          |          |          |          |          |
|----------|----------|----------|----------|----------|----------|----------|----------|----------|----------|
| 210471.1 | 140331.2 | 41412.58 | 4675.044 | 36636.91 | 110280   | 117969.2 | 416114.6 | 63111.04 | 215483.9 |
| 3058664  | 2882601  | 0        | 0        | 0        | 0        | 0        | 6633000  | 5427262  | 799065.2 |
| 1980712  | 1229796  | 20589.78 | 16444.59 | 2113417  | 220863.5 | 551140.6 | 3137323  | 911998.3 | 1818371  |
| 8330231  | 2275054  | 935274   | 1940900  | 1607072  | 9257220  | 7209331  | 9001006  | 6188585  | 7721254  |
| 327459.2 | 294757.8 | 8206.114 | 0        | 0        | 35735.3  | 31265.09 | 370342   | 30220.18 | 217199.4 |
| 1.09E+08 | 68073333 | 1019374  | 433706   | 3946441  | 13659676 | 1.26E+08 | 1.92E+08 | 7754120  | 1.3E+08  |
| 914188.3 | 855437.8 | 0        | 7171.106 | 0        | 0        | 29437.7  | 1807347  | 191674.7 | 667549.2 |
| 3910646  | 2652932  | 360370.3 | 185038.3 | 824923.2 | 1470369  | 2690021  | 7284950  | 1225096  | 1338822  |
| 891613.6 | 832929   | 6873.269 | 4150.131 | 8198.885 | 19343.29 | 5270.707 | 1645772  | 4443.327 | 239155.5 |
| 47592.73 | 31881.73 | 476864   | 965631.7 | 518693.1 | 159067.2 | 36227.17 | 14689.88 | 91101.09 | 17569.89 |
| 180382   | 202092.4 | 548252.7 | 456862.2 | 1223624  | 2376385  | 566552.3 | 277914.4 | 25559.89 | 65612.61 |
| 309301.4 | 254341.3 | 5893.477 | 0        | 3696.2   | 75567.22 | 120166.6 | 480583   | 90699.58 | 200104.6 |
| 369881.4 | 260305.3 | 3227.889 | 35512.19 | 61055.55 | 138755.2 | 237527.7 | 220326.5 | 111765.7 | 260579.8 |
| 1555791  | 1383875  | 82184.9  | 89349.22 | 94919.48 | 115374   | 68262.64 | 549346.4 | 3788544  | 1872029  |
| 124026.7 | 124110.8 | 261136.5 | 235191   | 741854.9 | 1078945  | 284049.1 | 114817.1 | 5430.609 | 63035.3  |
| 170613.1 | 110056.1 | 38155.73 | 0        | 45705.97 | 159989.3 | 10482.75 | 213872.9 | 35013.27 | 79099.61 |
| 716808.2 | 575496.7 | 84916.1  | 114485.1 | 78368.11 | 212808.5 | 51377.16 | 1391496  | 72858.76 | 162269.6 |
| 3075305  | 2310123  | 1654172  | 73609.82 | 87500.18 | 266267.9 | 1145358  | 2747762  | 1383401  | 1071922  |
| 179318.3 | 167668.6 | 464730.4 | 334159.3 | 902371.6 | 135343.3 | 658012.8 | 172931.7 | 42930.11 | 212946   |
| 212487.7 | 148983.8 | 0        | 0        | 4154.793 | 99914.25 | 162819.5 | 312837   | 53639.71 | 381376.5 |
| 115861.5 | 70278.05 | 62082.87 | 49868.3  | 50337.65 | 14580.53 | 33345.35 | 180183.2 | 30033.02 | 99181.25 |
| 10776960 | 8691410  | 230127.3 | 169395.1 | 904224.9 | 2051785  | 4878921  | 18680582 | 2339433  | 7132226  |
| 8398708  | 3193815  | 1087267  | 204839.2 | 8911163  | 2632219  | 6784008  | 12648147 | 10338342 | 4919654  |
| 10676020 | 3759141  | 2078839  | 4220293  | 4323445  | 10464894 | 8969661  | 8452106  | 6103411  | 10055313 |
| 4729943  | 4468419  | 28951.55 | 41453.93 | 19267.36 | 46344.18 | 4826.2   | 6555911  | 0        | 871887.1 |
| 82711.29 | 84401.78 | 314308.9 | 368683.8 | 948916.8 | 1618084  | 239062.2 | 124754.4 | 29533.18 | 21524.24 |
| 873645.9 | 703293.1 | 62000.16 | 206121.4 | 88055.28 | 199365.6 | 120156.8 | 1602603  | 78880.06 | 243604.8 |
| 4139231  | 3532145  | 418413.4 | 401626.3 | 426054.6 | 26654.46 | 889216.7 | 6103125  | 8618947  | 618786.1 |
| 347567.4 | 275861.4 | 10420.35 | 0        | 44086.2  | 10650.38 | 229174.3 | 460528.4 | 14827.43 | 187292   |
| 178473.7 | 140808.6 | 31928.77 | 33519.08 | 27625.08 | 36805.75 | 23132.99 | 210603.6 | 20943.5  | 42401.34 |
| 167008.1 | 151190.5 | 8567.505 | 2724.861 | 3456.892 | 17132.59 | 10484.79 | 330106   | 7596.017 | 77776.79 |
| 95145.21 | 76970.52 | 0        | 0        | 0        | 57806.28 | 16161.84 | 48496.7  | 31341.2  | 48276.57 |
| 741866.4 | 121006.7 | 832268.7 | 1092007  | 1164611  | 1914168  | 932634.6 | 675422.6 | 575597.1 | 853425.1 |
| 208658   | 123817   | 63823.84 | 78890.89 | 44063.02 | 104059.4 | 106437.1 | 202409.6 | 108808.5 | 229567.2 |
| 2733901  | 827636.7 | 582790.5 | 1231554  | 1278501  | 2870757  | 2200578  | 2348094  | 1705993  | 2522438  |
| 1191269  | 1136095  | 0        | 5928.052 | 0        | 0        | 0        | 1653249  | 0        | 120169   |
| 9205.505 | 7568.459 | 68650.26 | 31212.75 | 126243.6 | 152174.1 | 0        | 20993.81 | 0        | 6915.933 |
| 215839   | 158901   | 19371.12 | 2658.967 | 0        | 45981.48 | 174460.1 | 443786.8 | 0        | 250283.9 |
| 21907.72 | 30274.28 | 129081.5 | 138898.5 | 327657.2 | 728447.3 | 134546.4 | 32290.42 | 0        | 6690.119 |
| 898256.5 | 661068.7 | 111773.6 | 151548.5 | 203618.7 | 264552.2 | 306945.4 | 918169.1 | 72979.1  | 430410.1 |
| 409213.1 | 379803.9 | 0        | 0        | 0        | 39369.21 | 20145.55 | 0        | 610033.4 | 493518.1 |
| 2767046  | 2108470  | 480167.5 | 625975.9 | 547093.1 | 582906.7 | 569162.7 | 1139635  | 6445074  | 2450677  |
| 114798.9 | 79093.92 | 0        | 0        | 0        | 16938.08 | 120959.1 | 166841.7 | 0        | 65873.02 |
| 22945919 | 14103708 | 8027994  | 2547373  | 13879121 | 2648174  | 13915586 | 30211668 | 0        | 33490803 |
| 3525151  | 2846980  | 566004   | 874067.2 | 778191.1 | 320919.2 | 228952   | 3255296  | 345354.8 | 1422303  |
| 865234.2 | 805550.2 | 7729.741 | 14812.1  | 24339.51 | 44818.39 | 29369.94 | 738606.2 | 23198.15 | 199526.4 |
| 1473103  | 376613.7 | 551979.5 | 921932.8 | 857849.8 | 1400074  | 1325168  | 1976103  | 1224256  | 1654886  |

|          |          |          |          |          |          |          |          |          |          |
|----------|----------|----------|----------|----------|----------|----------|----------|----------|----------|
| 147690.6 | 59269.81 | 107371.2 | 106982.7 | 126308.6 | 30985.44 | 21305.35 | 188123.8 | 85239.4  | 88102.34 |
| 2157916  | 589407.4 | 829518.3 | 1259409  | 1386262  | 2087853  | 1785933  | 1785426  | 1457894  | 2068702  |
| 1409731  | 1347064  | 2860.256 | 0        | 0        | 10723.55 | 11837.1  | 1875583  | 90942.49 | 576108.4 |
| 1437662  | 304069.9 | 2392404  | 2021945  | 2290486  | 7249584  | 6291897  | 1962947  | 1216360  | 1256781  |
| 124246.6 | 116527   | 373899.2 | 354728.8 | 955815.1 | 1134376  | 91736.66 | 230657.1 | 0        | 7559.373 |
| 195306.8 | 185763.1 | 4336.384 | 5100.972 | 0        | 0        | 0        | 410604.7 | 0        | 0        |
| 223648.9 | 201326.9 | 28214.79 | 22661.45 | 8405.824 | 0        | 11295.57 | 214123   | 21823.62 | 48467.45 |
| 1610757  | 961651.5 | 14430.31 | 11795.23 | 113273.1 | 387458.5 | 1895250  | 2731761  | 100899.4 | 1666025  |
| 333004.3 | 250634.6 | 45571.47 | 87362.96 | 212982.3 | 6951.559 | 12337.99 | 315275.8 | 15733.43 | 189090   |
| 472612.2 | 440556   | 0        | 4582.934 | 0        | 5569.579 | 61602.39 | 936173.3 | 32500.94 | 151108   |
| 336239.1 | 316672.7 | 0        | 0        | 0        | 26001.8  | 8330.735 | 295128.8 | 53021.84 | 259182.8 |
| 640904   | 512531.8 | 0        | 4811.953 | 81690.7  | 2721.67  | 452973   | 1055591  | 264162.8 | 1246833  |
| 164276.4 | 140737.9 | 275756.6 | 225321.9 | 469142.5 | 1152294  | 636844.1 | 182436.6 | 8738.72  | 147136.1 |
| 497760.3 | 460867.3 | 2433.268 | 3558.569 | 16991.76 | 41538.73 | 29801.44 | 720874.9 | 28623.78 | 241121   |
| 1016775  | 186968.3 | 369629.9 | 589623.3 | 578204   | 1120931  | 848647.2 | 898996.8 | 836489.5 | 992855.1 |
| 2396639  | 2291983  | 5873.829 | 17866.69 | 11068.03 | 48929.13 | 0        | 0        | 4637863  | 4885582  |
| 20881441 | 7081387  | 7876973  | 9849237  | 10150452 | 19888030 | 16959625 | 17640745 | 15346246 | 15866894 |
| 1224877  | 1176282  | 0        | 12836.2  | 0        | 5975.471 | 0        | 2032209  | 7681.599 | 134523.2 |
| 3368568  | 1213495  | 348724.8 | 1202455  | 1186971  | 3266288  | 3005395  | 2781013  | 1817242  | 3100923  |
| 2112107  | 994902.4 | 256638.6 | 473382.3 | 576536.2 | 1921930  | 1686341  | 1500613  | 1056698  | 1653571  |
| 1004731  | 676632.9 | 155486.4 | 155710.5 | 174912.1 | 91269.76 | 893333.4 | 1015991  | 99377    | 631370.6 |
| 194401.8 | 173796.5 | 20676.87 | 13108.71 | 10062.28 | 14771.58 | 12766.43 | 117334.7 | 19372.43 | 89581.07 |
| 2705901  | 2608504  | 2360.237 | 10193.98 | 0        | 5784.806 | 0        | 4571140  | 5404.499 | 419950.8 |
| 94828.07 | 91539.56 | 0        | 0        | 0        | 0        | 0        | 99377.9  | 0        | 4474.696 |
| 229553.9 | 205574.2 | 0        | 3014.979 | 3316.841 | 34563.3  | 43790.5  | 89078.55 | 122336.7 | 568121.2 |
| 204046.6 | 193294.7 | 2953.24  | 0        | 0        | 16825.14 | 0        | 306488   | 0        | 29965.96 |
| 392880.3 | 377303.7 | 3352.401 | 4084.489 | 0        | 4250.494 | 0        | 633066.9 | 5315.096 | 64366.2  |
| 286981.6 | 56902.77 | 42169.85 | 32360.46 | 90869.58 | 171871.9 | 372092   | 259124.2 | 227554.8 | 280411.1 |
| 123441.4 | 89017.74 | 731632   | 423489.2 | 1436427  | 3597941  | 973554   | 82607.01 | 80251.74 | 83428.2  |
| 5293606  | 5116650  | 0        | 0        | 0        | 0        | 0        | 6529935  | 13443714 | 0        |
| 1356055  | 447292.7 | 422733   | 710249.9 | 668605.7 | 1375712  | 1014929  | 1331191  | 749988   | 1176618  |
| 1152481  | 133346.7 | 145520.7 | 173221.9 | 182797.4 | 1305072  | 1059014  | 1215338  | 1093106  | 1015577  |
| 1280430  | 1059728  | 17824.98 | 15622.15 | 67325.77 | 311124   | 535220.9 | 1003041  | 1044651  | 678529.8 |
| 417672   | 244740.2 | 3126.647 | 3659.935 | 8295.59  | 19366.87 | 539273.7 | 685946.4 | 187425.5 | 204702.3 |
| 254160.6 | 211077.7 | 0        | 0        | 6555.877 | 21257.67 | 158270.8 | 449851.3 | 88244.32 | 138188   |
| 98409.13 | 92693.42 | 0        | 3242.398 | 4503.601 | 0        | 6538.395 | 52040.99 | 4033.494 | 51848.76 |
| 3356623  | 1270397  | 1571577  | 1399486  | 2638511  | 2576880  | 2015745  | 1917290  | 3655980  | 4314255  |
| 2300347  | 316214.7 | 1372507  | 1561540  | 1845767  | 2488772  | 1863580  | 2157707  | 1966531  | 2193483  |
| 1261163  | 598421.6 | 462104.5 | 583217.3 | 555468.1 | 746185.7 | 890687.6 | 1711829  | 687590.1 | 914268.8 |
| 1381191  | 788955.8 | 0        | 0        | 5689.844 | 0        | 1843049  | 2433175  | 258474.6 | 1391155  |
| 407940.2 | 60303.4  | 179185.7 | 295469.2 | 300128.4 | 467323.2 | 183766.9 | 488401.4 | 354595.8 | 415937   |
| 730276.3 | 610811.9 | 19443.43 | 41851.7  | 64732.7  | 138088.4 | 250774.2 | 134741.2 | 265484.2 | 1341163  |
| 1282566  | 1246510  | 0        | 0        | 0        | 0        | 0        | 2756208  | 2109289  | 0        |
| 36178.43 | 21215.21 | 102543.8 | 80028.1  | 375327.6 | 580938.2 | 149189.4 | 38431.82 | 71805.24 | 20667.61 |
| 1564730  | 1043256  | 36677.76 | 50610.99 | 203982.1 | 905944.5 | 1176882  | 1338422  | 257131.5 | 1068204  |
| 5320616  | 2466680  | 1098781  | 755220.2 | 1173942  | 5995579  | 2960918  | 7635522  | 2945638  | 2367699  |
| 1786011  | 747565.5 | 288725.5 | 481700.5 | 658842.9 | 1535323  | 1639214  | 1439285  | 961491.3 | 1400909  |

|          |          |          |          |          |          |          |          |          |          |
|----------|----------|----------|----------|----------|----------|----------|----------|----------|----------|
| 1897915  | 1376877  | 6505.396 | 4586.478 | 13144.52 | 14370.34 | 2012576  | 3931277  | 43866.49 | 1822260  |
| 148391.5 | 35126.83 | 58980.15 | 458367.2 | 537724.3 | 1393586  | 843822   | 100928.5 | 150783.6 | 170529.4 |
| 79901.23 | 71769.79 | 0        | 2633.251 | 0        | 22587.14 | 6754.291 | 180326.6 | 0        | 28135.83 |
| 416085.7 | 368665   | 40359.98 | 43406.28 | 33148.95 | 61303.36 | 11354.01 | 343206.3 | 31756.18 | 170052.6 |
| 312841.2 | 291158.8 | 13033.27 | 15566.9  | 0        | 22464.54 | 19838.67 | 34237.81 | 679554.4 | 567218.1 |
| 1144803  | 992021.6 | 99749.48 | 142672.2 | 93689.48 | 62082.7  | 241502.1 | 2214538  | 197220.3 | 130247.7 |
| 134730.2 | 60620.68 | 2987.351 | 0        | 3288.534 | 111915.7 | 144827   | 101517   | 143046.2 | 128717.8 |
| 368700.1 | 354118.1 | 0        | 2460.959 | 4288.106 | 23201.64 | 0        | 299412.7 | 0        | 104163.4 |
| 544751.6 | 429488.7 | 5174.252 | 0        | 3099.487 | 236588.1 | 285465.1 | 855468.2 | 46655.32 | 391662.3 |
| 630254.8 | 112876.7 | 21212.01 | 5044.58  | 48279.91 | 767071.2 | 520843.7 | 702099   | 438147.6 | 715107.7 |
| 46193585 | 34066422 | 5655089  | 3506384  | 10410920 | 9437031  | 28389390 | 89255677 | 1441095  | 27689860 |
| 8370297  | 1310281  | 4861405  | 5995207  | 6030041  | 8514207  | 7743587  | 8600812  | 6601458  | 7562824  |
| 250525.9 | 65596.91 | 971895.1 | 932692   | 873483.9 | 94326.2  | 379598.3 | 283890.5 | 310742   | 268296.9 |
| 4107222  | 4003044  | 2893.655 | 10369.63 | 4227.807 | 42436.82 | 31769.11 | 3998995  | 0        | 673493.5 |
| 128505.3 | 126110.7 | 0        | 0        | 0        | 0        | 0        | 114053.4 | 0        | 46969.44 |
| 501740.5 | 429665.6 | 73916.98 | 104663.4 | 95551.32 | 22778.73 | 25202.5  | 571343   | 36677.24 | 157015.6 |
| 904200.9 | 566673.7 | 225082.5 | 332931.7 | 325478.3 | 412278.4 | 343253.5 | 1159902  | 341799.6 | 382440.7 |
| 617356.5 | 451516.3 | 119359.6 | 168621.3 | 162367.5 | 312901.5 | 32233.61 | 690203.9 | 409524.8 | 66045.07 |
| 356104.2 | 270979.3 | 12015.09 | 6171.885 | 31421.41 | 59434.96 | 284533.5 | 699758.8 | 17633.27 | 163442.4 |
| 208630   | 127185.5 | 17032.09 | 37055.01 | 13446.67 | 44762.28 | 231859.3 | 347444.3 | 12116.54 | 174255.2 |
| 33412110 | 4126490  | 18461777 | 28295884 | 25392953 | 34950766 | 27707908 | 33822959 | 31107533 | 29726961 |
| 23978.5  | 19996.48 | 131092.8 | 73363.68 | 198075.6 | 22136.32 | 50499.79 | 36888.72 | 5287.659 | 0        |
| 74110.45 | 66826.39 | 142827.4 | 1380584  | 776114.3 | 1943925  | 134735   | 49937.09 | 79408.73 | 43451.84 |
| 240397.5 | 171904.2 | 83298.13 | 103565.6 | 79125.49 | 59101.73 | 6644.614 | 404288.4 | 33509.86 | 76071.54 |
| 101866.8 | 75295.94 | 3137.323 | 0        | 0        | 42613.05 | 77596.29 | 195300.5 | 0        | 61794.7  |
| 327781.4 | 218494.2 | 54878.48 | 112297   | 80673.85 | 155841.6 | 129069.1 | 481360.3 | 117924.1 | 261359.6 |
| 681807.6 | 650161.3 | 45314.46 | 23799.13 | 0        | 40565.83 | 0        | 497189.3 | 6769.983 | 248259.5 |
| 2933090  | 1204791  | 673519.1 | 885771.5 | 939468.8 | 3245022  | 1861233  | 3070933  | 1631400  | 2024603  |
| 2072076  | 1839405  | 188942.1 | 257452.1 | 187702.8 | 222717.7 | 175348.4 | 1038293  | 665318.1 | 827989.2 |
| 1942212  | 1315355  | 11102.04 | 10283.5  | 8068.482 | 254291.3 | 2205082  | 2171953  | 218113.4 | 1042736  |
| 1022835  | 657010.6 | 420864.6 | 505286.5 | 486449.8 | 240184.3 | 142057.3 | 1218711  | 170937.1 | 503050.5 |
| 1167262  | 763776   | 178464.7 | 366797.1 | 198484.5 | 811346.3 | 416823.3 | 861881.3 | 225855.6 | 858320.3 |
| 533335.4 | 458654   | 1822909  | 2885252  | 1650126  | 775644   | 448517.3 | 675732.7 | 35941.82 | 86985.33 |
| 824392.7 | 553272   | 9780.64  | 14477.73 | 31112.77 | 433383.9 | 729756.4 | 1284763  | 143474.8 | 491231.3 |
| 2999137  | 1794952  | 29984.54 | 27420.65 | 100984.2 | 556977.1 | 3732045  | 4967118  | 285720.8 | 2724672  |
| 1513323  | 1138088  | 0        | 13958.32 | 19309.91 | 195968   | 1431051  | 3383375  | 1413264  | 881362.6 |
| 268152.4 | 203119.5 | 19667.34 | 26332.25 | 14923.96 | 77191.97 | 176157.1 | 448693   | 56002.31 | 167882.9 |
| 839124.3 | 325640.6 | 3610743  | 1215465  | 4774678  | 375080   | 3397131  | 1353585  | 959817.6 | 545749.5 |
| 3406221  | 1917269  | 23070.25 | 9965.651 | 32093.99 | 360820.2 | 4536492  | 4751689  | 241761.5 | 3758635  |
| 413836.8 | 295941.9 | 44185.95 | 51497.22 | 38046.37 | 282079.5 | 157587   | 328021.2 | 52339.84 | 265137.2 |
| 5562813  | 5323026  | 50074.29 | 71116.9  | 57822.52 | 621493   | 99571.22 | 3368728  | 515661.4 | 2290743  |
| 190937.3 | 133628   | 186046.9 | 878195.5 | 375514.8 | 782498.7 | 296800   | 136148.2 | 100580.8 | 120287.5 |
| 2275287  | 1501504  | 56457.94 | 175959.9 | 142483.6 | 283855.5 | 2548437  | 4133805  | 78244.38 | 2355475  |
| 1559537  | 1544162  | 0        | 0        | 0        | 0        | 0        | 3472070  | 2888660  | 353463.3 |
| 776138.9 | 428198.4 | 345468.2 | 4645958  | 3131142  | 4780619  | 1127000  | 1094876  | 299903.4 | 370250.8 |
| 70371756 | 41926999 | 499066.2 | 447056.2 | 913690.3 | 37842594 | 76037885 | 1.19E+08 | 64345716 | 72038795 |
| 98595.64 | 42778.65 | 90552.02 | 231600.4 | 278276.1 | 199064.4 | 108219.1 | 56189.91 | 140026   | 144305.3 |

|          |          |          |          |          |          |          |          |          |          |
|----------|----------|----------|----------|----------|----------|----------|----------|----------|----------|
| 2949926  | 2128496  | 818603.3 | 1054009  | 738053   | 779678   | 626658.1 | 1750466  | 1532136  | 6647549  |
| 287854.7 | 190596   | 27257.78 | 50335.65 | 52320.93 | 158174.8 | 188434.8 | 541291   | 52536.65 | 161269.1 |
| 153752.6 | 151691.1 | 0        | 0        | 3765.125 | 0        | 0        | 179171.4 | 0        | 48540.2  |
| 947226.5 | 623449.1 | 125215.4 | 219154.9 | 174964.5 | 613469.6 | 464646.6 | 392243.2 | 1835048  | 1365426  |
| 57759.32 | 25208.32 | 223579.5 | 132258.2 | 548457.8 | 989288.5 | 196700.2 | 82733.59 | 49109.94 | 19324.74 |
| 160730.7 | 102274.5 | 638890.6 | 543264.3 | 1571991  | 111305.2 | 622161.4 | 324786.9 | 149192.3 | 160103.6 |
| 2107949  | 2091674  | 0        | 0        | 0        | 0        | 0        | 5244682  | 3118835  | 0        |
| 379182.9 | 353877.7 | 2633.823 | 4776.615 | 8642.889 | 51862.33 | 46967.08 | 591273.4 | 34732.59 | 254241.1 |
| 13568153 | 2860959  | 8226226  | 10156947 | 10352351 | 13539202 | 10284911 | 13628173 | 11386106 | 11409300 |
| 3874806  | 3826108  | 3203.561 | 11914.79 | 3197.664 | 40063.32 | 50737.46 | 2963921  | 669399.7 | 2816868  |
| 117735.3 | 104826.7 | 4226.596 | 0        | 0        | 13002.19 | 45071.76 | 121520.8 | 5406.335 | 64895.54 |
| 358523.7 | 351741.3 | 5162.308 | 3379.096 | 0        | 9339.797 | 4957.18  | 733506.8 | 0        | 115129.3 |
| 316647.8 | 223625   | 49780.09 | 97629.1  | 87720.18 | 107693.3 | 116913.8 | 446970.1 | 57714.09 | 151238.1 |
| 4913577  | 1193543  | 2286077  | 3219610  | 2998278  | 4811417  | 4371309  | 5255617  | 3195061  | 4219792  |
| 81974.07 | 70608.17 | 91698.95 | 720453.8 | 448620.9 | 991530.4 | 110106.8 | 105446.3 | 5634.199 | 7935.542 |
| 917321.3 | 635016.2 | 1137559  | 895139.1 | 2870707  | 4203817  | 2332787  | 1707920  | 122863.4 | 714939.8 |
| 805255.9 | 802166.2 | 0        | 0        | 0        | 0        | 0        | 1101488  | 9293.705 | 21193.89 |
| 42881.96 | 50902.99 | 37344.48 | 190224.7 | 50444.19 | 355007.5 | 301844.7 | 67152.32 | 13216.8  | 0        |
| 121460.7 | 109800   | 8708.32  | 9442.909 | 6708.203 | 6381.938 | 25809.87 | 66327.01 | 6900.743 | 124728.3 |
| 3989238  | 1696320  | 934593.4 | 605935.8 | 956645.3 | 4659658  | 2415986  | 5317103  | 2340514  | 1944668  |
| 260107.2 | 257659.6 | 2887.156 | 0        | 0        | 0        | 6425.711 | 540536.3 | 0        | 83427.69 |
| 102975.8 | 102656.1 | 647561.4 | 50102.36 | 403703.9 | 1100561  | 301170.3 | 92259.33 | 45662.92 | 27858.68 |
| 835461.7 | 821993.4 | 3283.616 | 4330.234 | 18404.3  | 20970.58 | 14134.79 | 1771739  | 40240.77 | 309960.1 |
| 1757348  | 1503738  | 0        | 0        | 44967.2  | 58545.59 | 1161440  | 3841864  | 385611.4 | 1626743  |
| 728470.1 | 672993.3 | 29391.59 | 88027.65 | 88575    | 25521.35 | 43299.27 | 20698.06 | 1014956  | 954291.1 |
| 409058   | 158126.1 | 102114.2 | 115184   | 143777.4 | 472832.1 | 253461.6 | 564280.1 | 373119.7 | 292696.1 |
| 4133094  | 3927711  | 139108.6 | 191466.2 | 191214.7 | 189521.8 | 308195.7 | 388792.9 | 3866072  | 5578803  |
| 86569.19 | 86562.46 | 0        | 0        | 0        | 0        | 0        | 87894.21 | 0        | 0        |
| 223719.5 | 190066.9 | 24949.84 | 70818.05 | 26425.41 | 28760.37 | 18429.63 | 260378.4 | 20153.38 | 67875.82 |
| 329333.5 | 314093.9 | 9237.155 | 28237.4  | 14462.3  | 19112.17 | 5872.902 | 431071.8 | 4145.133 | 75695.07 |
| 5113188  | 5065367  | 11066.76 | 2449.22  | 18433.67 | 174606.5 | 52354.57 | 87587.56 | 4226154  | 10417188 |
| 321834.9 | 283250.4 | 54067.53 | 67376.08 | 27967.63 | 39825.52 | 6515.465 | 382320.8 | 11431.25 | 62100.28 |
| 1448299  | 1346731  | 3044.394 | 0        | 4249.681 | 33506.31 | 490282   | 2466048  | 419589.8 | 1012811  |
| 208510   | 202708.6 | 4694.269 | 0        | 7801.799 | 6960.741 | 11046.3  | 241599.5 | 4684.481 | 48739.75 |
| 650810.4 | 644909.5 | 0        | 8535.771 | 8934.131 | 12321.4  | 5228.334 | 9412.22  | 821314.8 | 1605044  |
| 244139.3 | 217134.8 | 0        | 0        | 0        | 24158.16 | 115906.3 | 264902.4 | 5673.733 | 79849.85 |
| 552515   | 96851.78 | 414261.2 | 515752.2 | 457860.9 | 492682.2 | 383682.7 | 706247.6 | 462957.9 | 510822.8 |
| 701257.5 | 116322.3 | 444386   | 471360.3 | 558373.1 | 741959.7 | 577892.7 | 750239.8 | 604851.4 | 608319.3 |
| 194575.7 | 133983.1 | 18576.61 | 53571.84 | 0        | 61134.21 | 162865.8 | 126584.7 | 96978.19 | 292213.5 |
| 8374358  | 5259268  | 33851.11 | 48270.76 | 474732.3 | 1198261  | 10299137 | 14057085 | 606102   | 8548829  |
| 392613.4 | 264175.4 | 88888.53 | 88570.76 | 99377.93 | 258198.7 | 114377.9 | 349118.6 | 120694.5 | 168413.4 |
| 496322.5 | 473522.9 | 8354.307 | 7134.572 | 14096.78 | 43931.41 | 47491.35 | 425467   | 7503.032 | 162859.9 |
| 499849.5 | 341946.8 | 111529.7 | 130358   | 153194.8 | 174642.4 | 227960.5 | 335594.5 | 148303   | 327661.5 |
| 96790.52 | 62565.06 | 408188.9 | 236001.6 | 660348.5 | 184476.2 | 99549.31 | 181073.4 | 39327.85 | 135639.5 |
| 3662724  | 1242662  | 1582399  | 2090700  | 2156922  | 3436095  | 2660537  | 3231000  | 2715353  | 2835417  |
| 5020657  | 4917901  | 35466.83 | 34034.22 | 53123.45 | 187437.4 | 295637.7 | 357015.5 | 10975186 | 9480223  |
| 400927.2 | 310199.3 | 102011.2 | 154342.8 | 122856   | 62609.99 | 21662.77 | 643017.3 | 31128.67 | 175462   |

|          |          |          |          |          |          |          |          |          |          |
|----------|----------|----------|----------|----------|----------|----------|----------|----------|----------|
| 382244.3 | 266336   | 6529.27  | 2362.162 | 42787.6  | 76940.18 | 394698.4 | 707197.9 | 11525.09 | 245855.3 |
| 3015618  | 2114828  | 624333.8 | 621191.3 | 484205.8 | 1616241  | 1236953  | 6540610  | 2377256  | 1090875  |
| 181130.3 | 113870.2 | 477076.5 | 740305.6 | 677440   | 1897714  | 265462.5 | 345742.1 | 118055.3 | 85336.62 |
| 54746.42 | 54661.05 | 355684.6 | 203723.2 | 653901.6 | 1786461  | 434506.2 | 120508.5 | 0        | 20436.81 |
| 283543.2 | 181815.6 | 17385.07 | 23888.79 | 34316.7  | 238246.7 | 172257.6 | 206115   | 86155.45 | 250266.9 |
| 442713.8 | 376071.5 | 97103.09 | 123337.1 | 84776.82 | 28233.66 | 12884.58 | 57737.24 | 483830.1 | 805020.4 |
| 954184.8 | 129980.4 | 131235.7 | 118125.6 | 176062.2 | 1141605  | 838367   | 894294.6 | 961695.8 | 811224.2 |
| 5482555  | 2761238  | 92209.11 | 76392.03 | 193278.6 | 824556.5 | 7639180  | 6319199  | 1347547  | 4137357  |
| 787652.7 | 633398.7 | 144690.1 | 181985.7 | 167035.1 | 109419.3 | 191403.9 | 1163537  | 89401.58 | 172217   |
| 8738787  | 8743676  | 47727.51 | 40313.07 | 110300.7 | 38925.9  | 53483.6  | 26935.7  | 19748074 | 16240834 |
| 243849.5 | 223281.4 | 2821.267 | 0        | 14040.39 | 0        | 96940.88 | 471281.3 | 56269.37 | 186878.3 |
| 2936985  | 1003008  | 752815.4 | 1365253  | 1531192  | 2959157  | 2360769  | 2516373  | 1892226  | 2358436  |
| 695706.8 | 668992.3 | 27022.11 | 50889.77 | 48915.61 | 17656.84 | 21201.4  | 5517.983 | 1150737  | 1530905  |
| 369498.2 | 364694   | 3049.279 | 0        | 0        | 7555.781 | 31979.36 | 586940.4 | 49148.43 | 294030.9 |
| 23829872 | 4240040  | 14753146 | 18275433 | 18919045 | 24588640 | 18838227 | 25392144 | 18612704 | 21144087 |
| 2424938  | 818023.2 | 442383.2 | 1042666  | 1075091  | 2387518  | 2185010  | 2022254  | 1483686  | 2199796  |
| 10307.71 | 12976.84 | 53738.6  | 54302.53 | 211424.4 | 373360   | 59236.72 | 0        | 0        | 9030.19  |
| 584885.4 | 386085.7 | 198568.3 | 255105.3 | 199744.4 | 260886.6 | 104191.7 | 776500.2 | 137955.3 | 281819.4 |
| 13923547 | 5187124  | 2906586  | 5890224  | 5971196  | 13433773 | 11976631 | 12581212 | 7752167  | 10720150 |
| 174186.1 | 117693.9 | 55013.38 | 36995.11 | 37166.04 | 47219.17 | 113948.7 | 271479.7 | 29989.98 | 62789.65 |
| 69966.03 | 67870.56 | 9264.964 | 5184.79  | 0        | 0        | 0        | 79741.35 | 0        | 0        |
| 8143756  | 2895765  | 1654368  | 3522838  | 3860545  | 7837843  | 7132477  | 6944673  | 4760980  | 6838897  |
| 61991.4  | 23848.08 | 328485.8 | 290719.8 | 219353.7 | 23565.08 | 90131.26 | 97949.62 | 52485.57 | 71832.49 |
| 240038.4 | 211599.2 | 6120.74  | 11742.99 | 3185.292 | 10064.73 | 126145.6 | 543544.4 | 65126.64 | 70835.8  |
| 18941775 | 11336354 | 2053257  | 1229610  | 5983014  | 2762396  | 21446600 | 33481125 | 6761158  | 8115586  |
| 153156.2 | 98947.44 | 20081.95 | 30243.51 | 27242.01 | 83588.44 | 113057.6 | 250450.3 | 73726.34 | 97354.75 |
| 115365.2 | 114158.3 | 175581.1 | 137610.1 | 357141.5 | 776214.7 | 394915.2 | 102265.4 | 36421.85 | 28119.08 |
| 5365619  | 492322.4 | 42377.5  | 8660.306 | 213688.4 | 5353887  | 6040292  | 5014482  | 5053856  | 5666174  |
| 130408.4 | 57065.35 | 382849.8 | 454489.2 | 112717.4 | 307856.2 | 136837.7 | 80979.79 | 146384.9 | 84577.17 |
| 379662.2 | 23390.54 | 397465.4 | 515710.3 | 525680.1 | 350742.7 | 491056.1 | 403529.8 | 400206.2 | 371286.8 |
| 15720314 | 8792199  | 62234.18 | 27844.19 | 274850.8 | 1512519  | 21536625 | 21780158 | 979119.8 | 18880373 |
| 908684.6 | 918547.3 | 0        | 0        | 3764.303 | 0        | 19654.02 | 17561.16 | 1790028  | 1984110  |
| 834932   | 771963.1 | 7556.285 | 12838.96 | 3966.646 | 111993.4 | 245221.6 | 549637   | 772698.9 | 523956.4 |
| 1953433  | 1487188  | 42415.58 | 59971.62 | 569712.9 | 192855.3 | 1533983  | 4039914  | 0        | 1528465  |
| 576781.5 | 453588.8 | 142466.2 | 166241.6 | 153821.3 | 143459.2 | 48872.27 | 375412.2 | 231770.7 | 1371624  |
| 1002102  | 509624   | 16020.28 | 65222.2  | 144669.8 | 321794.1 | 1306699  | 1121373  | 292541.4 | 700535.3 |
| 3011569  | 1074089  | 795096.7 | 1320476  | 1232474  | 2993970  | 2587367  | 2653158  | 1822118  | 2336589  |
| 6346306  | 4258666  | 233036.4 | 127765.6 | 742076.3 | 4190667  | 4907094  | 5074363  | 867605.1 | 4881822  |
| 78500.68 | 28846.2  | 111398.2 | 78357.1  | 113590.4 | 122110.6 | 114597.7 | 83266.45 | 52709.28 | 115580.9 |
| 2545823  | 698650.5 | 850657.6 | 1343476  | 1657581  | 2513913  | 2233584  | 2610076  | 1661046  | 2100246  |
| 41396.73 | 12355.72 | 232057.6 | 155016.1 | 121230.1 | 5637.364 | 98381.23 | 52999.81 | 46943.08 | 43382.94 |
| 221464.4 | 216101   | 0        | 2870.56  | 3478.806 | 31776.29 | 8221.77  | 325680   | 18964.51 | 209484.8 |
| 12334620 | 9577797  | 1883100  | 1011836  | 2775843  | 2278337  | 6801037  | 22353361 | 401274.4 | 6195549  |
| 940144.7 | 567106.4 | 51560.36 | 41440.47 | 473351.6 | 673270.5 | 603392.4 | 373873.3 | 1454593  | 275312.8 |
| 1047796  | 514040.6 | 75366.58 | 39270.95 | 38185.97 | 1338202  | 503764.7 | 1545303  | 479741.6 | 635696.4 |
| 406125.3 | 228020   | 3448.083 | 3001.882 | 3896.067 | 18346.28 | 563103.1 | 536270.6 | 15607.14 | 504467.4 |
| 12376.22 | 14681.22 | 237875.1 | 123197.4 | 387143.5 | 26161.3  | 33950.22 | 33962    | 7446.024 | 20473.07 |



|          |          |          |          |          |          |          |          |          |          |
|----------|----------|----------|----------|----------|----------|----------|----------|----------|----------|
| 1519649  | 890034.7 | 2902.307 | 0        | 4656.528 | 64871.14 | 2075021  | 1906594  | 101797.9 | 1640687  |
| 298765   | 113690.4 | 299699.1 | 540186   | 445360.6 | 857126.3 | 415980.5 | 125870.9 | 390124.1 | 314000.8 |
| 739230   | 504414.3 | 7326.685 | 3006.487 | 70871.06 | 463526.4 | 599704.5 | 575364.1 | 94217.05 | 530890   |
| 23701.85 | 29233.61 | 60832.67 | 56899.89 | 146116.4 | 188703.6 | 16318.17 | 18202.34 | 0        | 7251.874 |
| 2134063  | 698167.2 | 386413.5 | 579462.4 | 511522   | 2308011  | 1960941  | 2244488  | 1015915  | 2003106  |
| 5004774  | 2243497  | 720558.4 | 1783213  | 1618386  | 4399767  | 4399312  | 3736566  | 2709829  | 3739915  |
| 216651.7 | 89893.21 | 36741.42 | 108994.1 | 67008.53 | 247962.9 | 107436.3 | 157900.4 | 124989.2 | 175054.3 |
| 14005.4  | 15579.22 | 73994.5  | 73059.52 | 295616.6 | 512426.2 | 75379.71 | 8624.116 | 8552.641 | 12150.88 |
| 497144.3 | 336738.9 | 150173   | 211717.1 | 172444.2 | 223113.8 | 82632.51 | 654569.8 | 102127.8 | 170164.3 |
| 723895.2 | 485441.6 | 15748.09 | 3604.945 | 65550.13 | 511609.2 | 558925.2 | 578878.3 | 82690.7  | 550996.5 |
| 910708.2 | 905974.6 | 32902.18 | 33152.09 | 34319.82 | 14568.96 | 6561.46  | 7512.083 | 1787054  | 1930183  |
| 118967   | 39342.11 | 140653.4 | 188307.6 | 135238.7 | 255029.5 | 148288.4 | 142018.7 | 59412.98 | 107149.4 |
| 1.28E+08 | 79253145 | 6475872  | 3224161  | 16779085 | 95015461 | 1.08E+08 | 1.06E+08 | 24919046 | 94776374 |
| 672040.7 | 667395.6 | 21311.16 | 35107.89 | 33525.07 | 8516.712 | 0        | 654982.9 | 5379.966 | 68110.26 |
| 293204   | 293509.4 | 2774.229 | 4644.58  | 7376.394 | 17343.12 | 0        | 349281.8 | 0        | 81416.96 |
| 21070987 | 11355147 | 4398768  | 6530697  | 7608952  | 15242444 | 15441598 | 32523928 | 7076964  | 12881938 |
| 56854.14 | 27712.21 | 223073.9 | 115061.6 | 426563.3 | 1014104  | 251864.6 | 88437.21 | 46865.51 | 14880.29 |
| 171542.6 | 96683.28 | 2365.591 | 6008.87  | 13187.57 | 107618.3 | 188152.5 | 240653   | 8998.674 | 159578   |
| 50829.14 | 42661.9  | 152857.9 | 69511.84 | 207962.8 | 198011.8 | 26654.86 | 55092.04 | 10612.12 | 6327.332 |
| 1636980  | 390540.7 | 230170.2 | 11313.45 | 391441.3 | 1640418  | 1782016  | 1996026  | 1385250  | 1462370  |
| 7677.037 | 15558.8  | 289823.3 | 337091.1 | 606726.3 | 23698.69 | 0        | 0        | 0        | 35414.16 |
| 1084441  | 1094068  | 13180.72 | 18563.56 | 27360.21 | 22941.01 | 9082.236 | 19712.99 | 1917035  | 2490125  |
| 925829.7 | 754856.5 | 18556.87 | 56416.74 | 24683.53 | 87152.27 | 739253.1 | 1930818  | 168820.8 | 1305404  |
| 211502.6 | 47277.76 | 268555   | 314744.2 | 321332.2 | 604793.6 | 251312.5 | 154627.5 | 189791.4 | 204869.3 |
| 723461.8 | 525465   | 2804.234 | 4278.084 | 16782.99 | 24798.47 | 821170.3 | 734729.9 | 10759.28 | 687246.8 |
| 288232.7 | 281294.2 | 3258.27  | 0        | 0        | 14810.29 | 54054.9  | 739526.2 | 82351.03 | 330176.1 |
| 301298.7 | 61594.36 | 443339.6 | 322476   | 401164.1 | 457515.2 | 290388.1 | 294210.5 | 388638.9 | 276045.3 |
| 348396.2 | 332841.6 | 27465.86 | 37658.23 | 21239.64 | 20853.12 | 15033.61 | 722603.6 | 12195.41 | 22654.15 |
| 174669.3 | 174499.5 | 0        | 6643.984 | 8497.999 | 9101.286 | 0        | 263607.4 | 28013.95 | 122608.4 |
| 62223.15 | 11303.05 | 40245.98 | 34481.96 | 30952.18 | 76784.05 | 29055.56 | 73756.64 | 46388.15 | 65062.5  |
| 4.83E+08 | 2.96E+08 | 26292093 | 13726711 | 65400462 | 3.66E+08 | 4.12E+08 | 4.03E+08 | 96971249 | 3.59E+08 |
| 385885.8 | 134519.2 | 113669.6 | 214235.1 | 201389.9 | 370747.5 | 312060.8 | 354863.4 | 220200.2 | 342118   |
| 368692.2 | 162611.3 | 176594.9 | 229350.6 | 230935.5 | 130763.5 | 283527.9 | 450489.9 | 501874.2 | 478796.4 |
| 783311.6 | 380044.9 | 51970.77 | 63949.66 | 0        | 36959.68 | 1128355  | 1038434  | 205608.4 | 616496   |
| 570790.7 | 284913.9 | 5060.04  | 21918.59 | 57671.37 | 146529.8 | 781460.5 | 595978.6 | 172863.4 | 415588.6 |
| 13744132 | 13741856 | 215436.7 | 266698.8 | 246626.5 | 912789.2 | 316742.7 | 15949335 | 1656583  | 4054992  |
| 4247500  | 2967596  | 1109277  | 1406743  | 1445012  | 1418048  | 1447734  | 6094842  | 108864.5 | 2266663  |
| 28985640 | 29073564 | 958209.2 | 695807.9 | 356113.3 | 381877.5 | 1394290  | 65659841 | 53389148 | 6292973  |
| 21738.99 | 18163.75 | 44188.09 | 55479.63 | 214429.7 | 475850.8 | 166596.6 | 24742.27 | 0        | 8699.943 |
| 148937.4 | 116502.1 | 78823.33 | 405280.6 | 313591.2 | 529090.9 | 287154.9 | 73409.62 | 31888.34 | 92904.8  |
| 225841.5 | 110990   | 164715.2 | 618341.5 | 689025.5 | 618989.8 | 238794   | 97039.85 | 283290.7 | 382503   |
| 1252393  | 842858   | 54316.49 | 32907.1  | 120159.6 | 827475.4 | 1004167  | 1022238  | 145553.9 | 934990.9 |
| 118192.2 | 86646.48 | 0        | 4781.075 | 0        | 0        | 134801.2 | 163862   | 5171.592 | 68221.98 |
| 68198.35 | 70231.45 | 244862.7 | 524222.7 | 785057.1 | 135256.2 | 80662.49 | 179539.9 | 0        | 90259.76 |
| 2572001  | 2556193  | 163238.2 | 136924.2 | 71952.16 | 58278.82 | 44658.72 | 2478892  | 41089.96 | 295742.5 |
| 6036762  | 5920882  | 570112.1 | 391272.6 | 189481.7 | 216546.7 | 138828.5 | 5786319  | 173478.2 | 738508.4 |
| 821232.2 | 824730.8 | 32420.23 | 15594.46 | 27116.97 | 22489.01 | 13832.25 | 7392.227 | 852345.8 | 1980147  |

|          |          |          |          |          |          |          |          |          |          |
|----------|----------|----------|----------|----------|----------|----------|----------|----------|----------|
| 17193158 | 17104072 | 138780.9 | 147830.1 | 209465.8 | 1632277  | 1009742  | 15014697 | 2011720  | 6060559  |
| 198899.8 | 141696.2 | 187882   | 443074.8 | 569471.7 | 495611.5 | 228012   | 141300.6 | 244438.9 | 425678.7 |
| 544333.1 | 336366.6 | 107292.7 | 170900.5 | 134845.6 | 491187.6 | 165038.1 | 108421.9 | 934932   | 713794.8 |
| 139714   | 122278.3 | 24919.67 | 25066.92 | 23857.62 | 23596.95 | 9759.765 | 8176.65  | 264912.6 | 253180.9 |
| 187878.2 | 128220.7 | 409734.3 | 378314.3 | 982071   | 1700390  | 320231.4 | 276260.8 | 95546.93 | 46746.48 |
| 351096.9 | 196539.4 | 939051.6 | 1271071  | 345525.4 | 539394.1 | 522035.9 | 362993.6 | 653814.6 | 105516.5 |
| 1327043  | 916795.4 | 782720.2 | 503282.1 | 417494.5 | 99478.19 | 407728.6 | 2638304  | 92700.49 | 1468842  |
| 2117669  | 901756.6 | 400729.6 | 312365.4 | 449303.7 | 637779   | 2848499  | 3439822  | 1825007  | 1161956  |
| 1721913  | 1133719  | 538890.9 | 773399.5 | 796592.8 | 476176.7 | 552268.3 | 2601489  | 79579.9  | 986715.5 |
| 258535.4 | 194005.1 | 5249.807 | 0        | 4230.275 | 91222.19 | 232005.6 | 446285.5 | 45242.5  | 122330.5 |
| 572767.1 | 567050.6 | 27280.34 | 32385.92 | 35657.84 | 9256.289 | 21805.11 | 662130.2 | 14755.47 | 117136.5 |
| 1121235  | 1060562  | 110357.4 | 135271.4 | 129623.2 | 36842.41 | 76148.22 | 955411.9 | 72652.59 | 397762.1 |
| 188068.4 | 157779.8 | 44492.54 | 52987.25 | 37106.48 | 24739.36 | 21119.44 | 219360.1 | 13467.85 | 76076.9  |
| 500507.5 | 432207.3 | 3156.754 | 5325.218 | 26727.48 | 65303.67 | 319427.7 | 632158.3 | 377019.3 | 1178336  |
| 91542.6  | 84009.37 | 505590.1 | 202388   | 676287.8 | 1541147  | 191406.1 | 198960.1 | 13303.59 | 23416.49 |
| 749732.6 | 586446.7 | 164696.3 | 214753.4 | 214369.6 | 222499.1 | 110721.8 | 914388.5 | 32263.64 | 354960.5 |
| 244698.1 | 217603.4 | 9573.439 | 16188.23 | 15892.83 | 102980.1 | 33184.22 | 604467   | 17170.12 | 161781.9 |
| 1221552  | 798740.1 | 0        | 2372.49  | 6702.263 | 0        | 1599849  | 2220881  | 65703.78 | 1482288  |
| 1806796  | 1260921  | 43346.83 | 18886.99 | 168967.6 | 1254995  | 1316703  | 1267461  | 316493.4 | 1220968  |
| 14178531 | 9331953  | 561210.5 | 287974   | 1538696  | 10086069 | 11557657 | 11459595 | 2213551  | 10363037 |
| 3582702  | 2081266  | 653146.5 | 1007352  | 1202515  | 2490673  | 2468807  | 5588095  | 1015711  | 1991926  |
| 2490462  | 775051.6 | 392133.5 | 440445.9 | 550891.6 | 3028468  | 1994905  | 2306781  | 1722560  | 2063076  |
| 3890363  | 2819073  | 1177367  | 562109.4 | 1775142  | 695561   | 1716461  | 7074809  | 0        | 3691815  |
| 84684.97 | 67794.98 | 0        | 0        | 8006.448 | 0        | 80966.96 | 167890.4 | 12804.55 | 59541.57 |
| 1884922  | 1315351  | 41528.62 | 19058.68 | 161605.8 | 1305101  | 1394881  | 1333065  | 327294.9 | 1263322  |
| 237116.9 | 223236.1 | 2643.081 | 0        | 8922.72  | 12848.33 | 90340.65 | 408425.6 | 33631.68 | 145353.2 |
| 1036666  | 1063090  | 6348.367 | 7704.044 | 19843.84 | 15564.74 | 27492.7  | 1593467  | 62714.98 | 191842.2 |
| 1761109  | 1163042  | 6891.592 | 13491.88 | 10347.29 | 83850.87 | 2259406  | 3314391  | 95016.29 | 1878224  |
| 1111950  | 806592.2 | 2680.162 | 2115.084 | 12287.79 | 170853.7 | 1238762  | 1272370  | 99776.42 | 492182.1 |
| 313978.4 | 189220.9 | 120781.3 | 68997.22 | 108352.3 | 143886.1 | 220726   | 443924.3 | 63585.39 | 166734.8 |
| 264171.4 | 146269.2 | 2846.01  | 4720.527 | 6600.339 | 14360.23 | 373228.8 | 427636.8 | 120732.4 | 135470.3 |
| 608639   | 453299.8 | 163122.3 | 231984.5 | 200669.3 | 229734.5 | 47358.46 | 912135.7 | 107574.7 | 217676.1 |
| 281535.3 | 275590.9 | 23739.7  | 22701.36 | 12723.34 | 21212.64 | 6253.743 | 373773.1 | 4555.892 | 52501.78 |
| 9520294  | 3505305  | 2136791  | 3887701  | 3893583  | 10369703 | 7233447  | 7627586  | 5404057  | 8229302  |
| 329035.1 | 197519.3 | 19322.66 | 12020.96 | 24111.75 | 97983.81 | 405704.6 | 298521.4 | 91061.06 | 251614.3 |
| 556289   | 346108.5 | 248749.9 | 53006.48 | 222294.4 | 256541   | 342863.3 | 784415.6 | 134237.3 | 229545.4 |
| 6961588  | 4956841  | 300127   | 241255.8 | 2691807  | 3285667  | 4440225  | 5406473  | 4050671  | 15626764 |
| 816030.9 | 847749.4 | 0        | 7933.595 | 8981.461 | 0        | 5754.608 | 2162041  | 66598.14 | 482054.8 |
| 357617.5 | 265533.4 | 86007.02 | 129996.5 | 100823   | 90133.14 | 111577.6 | 579685.8 | 66293.57 | 84806.3  |
| 2047264  | 2140859  | 0        | 0        | 0        | 0        | 0        | 3084294  | 5229002  | 420580.3 |
| 454322.5 | 469169.6 | 0        | 9626.772 | 0        | 7246.886 | 11671.17 | 0        | 389192.5 | 892564.2 |
| 523489.2 | 535286.3 | 3420.441 | 2686.637 | 0        | 28721.97 | 24378.75 | 648768.2 | 34228.68 | 244867.6 |
| 11835149 | 12152696 | 159300.5 | 150733.5 | 171832.5 | 440194.1 | 197496.7 | 6645472  | 1591873  | 4249234  |
| 172535.2 | 171116   | 20904.58 | 8048.277 | 0        | 16678.06 | 0        | 142692.2 | 0        | 26065.65 |
| 128282.4 | 128765   | 7032.113 | 7127.314 | 8716.357 | 3979.09  | 0        | 177830   | 5272.507 | 10635.04 |
| 605725.5 | 634555.6 | 0        | 0        | 0        | 0        | 0        | 827967.8 | 1511534  | 0        |
| 89913    | 22368.77 | 146572   | 161930.6 | 144703.4 | 213799.1 | 55947.63 | 117343.4 | 90688.59 | 92662.56 |

|          |          |          |          |          |          |          |          |          |          |
|----------|----------|----------|----------|----------|----------|----------|----------|----------|----------|
| 581726.9 | 337925.3 | 244558.3 | 334094.9 | 306346.1 | 96544.58 | 314954.8 | 725143.9 | 116962.5 | 342678.7 |
| 324983.4 | 335120.5 | 5555.911 | 3468.914 | 7253.212 | 5811.505 | 4088.951 | 590531.9 | 12889.86 | 52308.51 |
| 921718.4 | 689692.3 | 10100.39 | 2556.524 | 5894.288 | 316698.4 | 874842.7 | 1388026  | 128000.9 | 708619.1 |
| 340651.7 | 354677.9 | 3552.295 | 4631.382 | 0        | 4201.93  | 0        | 839578.5 | 0        | 103745.5 |
| 1507376  | 1560815  | 0        | 2979.53  | 87313.4  | 7526.586 | 0        | 3912122  | 85927.37 | 592005.6 |
| 1137506  | 1016886  | 184756.3 | 184849.1 | 166853.8 | 84397.81 | 221450.4 | 878898.4 | 132749.9 | 504364.4 |
| 554558.3 | 361471.8 | 26263.63 | 42230.9  | 42438.91 | 26507.77 | 690646.6 | 745634.9 | 18333.02 | 858385.4 |
| 1844472  | 1574050  | 185751.5 | 29526.54 | 130917.4 | 496043.1 | 899585.7 | 3730639  | 334397.1 | 1756571  |
| 68752489 | 41984107 | 22062102 | 7909703  | 41490256 | 12959942 | 55887739 | 89374257 | 0        | 1.02E+08 |
| 1572495  | 823588.4 | 9151.595 | 8748.299 | 9049.279 | 130336.6 | 2285260  | 2603353  | 431487.5 | 1826008  |
| 449168   | 314812.8 | 20381.08 | 7318.639 | 9911.263 | 67252.1  | 519814.1 | 636948   | 71570.82 | 146971.4 |
| 33145.87 | 38683.19 | 130852   | 163106   | 535377.8 | 967115.7 | 121375.8 | 46622.79 | 0        | 13802.15 |
| 1186513  | 1107336  | 0        | 6813.356 | 12554.34 | 122416.5 | 548653.2 | 2244168  | 240849.9 | 710929.9 |
| 687643.7 | 426940.4 | 26855.49 | 38919.74 | 58712.12 | 377256.1 | 730926.1 | 1109937  | 230163.8 | 751833   |
| 468419.7 | 389590.6 | 125292   | 153558.1 | 118570.3 | 43077.49 | 57581.84 | 101260.5 | 155164.7 | 829227.4 |
| 13523.3  | 16550.95 | 7442.448 | 477503   | 2822651  | 481546.6 | 1772065  | 0        | 0        | 26901.22 |
| 311519.9 | 140815.8 | 158797   | 181778   | 219750.5 | 148462.3 | 183115.7 | 339939.4 | 412989.4 | 408613.1 |
| 151229.8 | 186792.7 | 233180.7 | 1758199  | 918135.3 | 3243877  | 416817.7 | 73235.66 | 16684.26 | 94698.44 |
| 12880797 | 13497866 | 0        | 0        | 0        | 570553.8 | 0        | 15542718 | 34727705 | 0        |
| 219229.6 | 231192.8 | 3313.523 | 0        | 0        | 0        | 0        | 496278.4 | 0        | 64447.77 |
| 154728.1 | 147624.2 | 24557.73 | 31024.36 | 7738.497 | 13048.43 | 0        | 167856.8 | 9597.548 | 7360.254 |
| 660593.5 | 519887.3 | 586966.5 | 1576340  | 1093383  | 2069756  | 1128315  | 589608   | 201546.5 | 300035.1 |
| 196839.4 | 43015.07 | 3929.099 | 0        | 12785.62 | 255558.3 | 160918.5 | 189826.9 | 249856.3 | 139947.8 |
| 777123.4 | 511023.3 | 330155.5 | 365824.5 | 288820.8 | 207348.5 | 282558   | 176059.5 | 1222332  | 908271.2 |
| 43507708 | 7607563  | 24950239 | 34617849 | 35051641 | 45461119 | 34067736 | 44570016 | 33609885 | 42335996 |
| 129988.6 | 115241.3 | 239948.7 | 168542.3 | 604745.2 | 1102035  | 331194.6 | 317605.6 | 94273.58 | 70817.37 |
| 8362.747 | 14098.75 | 320410.7 | 915036.6 | 463074   | 67809.52 | 0        | 0        | 0        | 9275.401 |
| 7920652  | 7421684  | 10411.77 | 5677.287 | 381195   | 629863.2 | 3623155  | 19131630 | 3155590  | 11412560 |
| 319323   | 167923.1 | 5825.477 | 3122.572 | 0        | 5656.383 | 471138.3 | 483633.2 | 42875.39 | 352723.5 |
| 4108948  | 3048320  | 352370.1 | 1094035  | 989422.6 | 2635666  | 1112099  | 2301083  | 717587   | 3087543  |
| 1877821  | 1959808  | 26862.1  | 38735.84 | 27889.42 | 46045.82 | 16201.37 | 1585538  | 19392.1  | 122874.6 |
| 331373.9 | 117073.5 | 184134.4 | 879687.2 | 1009020  | 785419.6 | 418985.4 | 207856.9 | 431704.4 | 477331.6 |
| 424016.5 | 409399.8 | 4980.757 | 4780.979 | 14462.48 | 22669.44 | 146632.6 | 899712.5 | 28821.08 | 258108.5 |
| 18792208 | 5093377  | 7611065  | 12146821 | 11814445 | 19194227 | 15542216 | 17098143 | 13607974 | 15887213 |
| 2312085  | 1611762  | 93603.07 | 92981.92 | 947010.7 | 1234808  | 1530826  | 1746063  | 1338654  | 5123714  |
| 549975.4 | 295282.3 | 271852.2 | 114296.4 | 471477.5 | 185189.2 | 294872.5 | 1027039  | 258448.3 | 607468.6 |
| 203039.6 | 145618.2 | 16683.57 | 28215.83 | 42457.27 | 144330.9 | 94809.09 | 195200.5 | 155512.4 | 91073.3  |
| 922470.4 | 635231.9 | 290177.4 | 391841   | 359322.7 | 363887   | 220882.9 | 1236845  | 274271   | 226585   |
| 6487058  | 1883854  | 3040857  | 4601248  | 4264779  | 6415421  | 4700865  | 6180573  | 4472960  | 5237734  |
| 729011.3 | 605859.8 | 93555.26 | 156626.4 | 110643.1 | 332450   | 106513.3 | 702525.9 | 39040.84 | 236132.1 |
| 260448.4 | 211431.9 | 279741   | 214997.5 | 713181.3 | 1318961  | 1088069  | 628029.4 | 97941.04 | 202001.8 |
| 2524304  | 1381371  | 3291.365 | 3587.394 | 0        | 231768.1 | 3647722  | 3970625  | 358786.1 | 2114676  |
| 323604.8 | 170428.3 | 3750.297 | 0        | 0        | 12691.19 | 478086.5 | 490353.5 | 60900.77 | 278870.9 |
| 817085.5 | 392476   | 1356525  | 1782887  | 1491545  | 1384709  | 552515.7 | 415536.7 | 723793.4 | 519900.2 |
| 8371576  | 8485044  | 92504.44 | 78016.83 | 115768.7 | 845583.9 | 899641   | 4861452  | 5077536  | 5288766  |
| 176154   | 36420.08 | 99186.88 | 115145.8 | 76547.71 | 139819.9 | 201238   | 178721.4 | 128889.1 | 156803.1 |
| 1998813  | 1640128  | 84609.17 | 154297.8 | 1314205  | 111542.8 | 614956.6 | 667555.8 | 2651602  | 4517696  |

|          |          |          |          |          |          |          |          |          |          |
|----------|----------|----------|----------|----------|----------|----------|----------|----------|----------|
| 1921063  | 1844359  | 181069.2 | 206473.8 | 162181.8 | 315812.4 | 85097.42 | 2634064  | 42110.87 | 246777.6 |
| 2649203  | 1398195  | 52109.4  | 10204.74 | 118802.3 | 575009.2 | 3739404  | 4010882  | 283935.6 | 3068735  |
| 839318.6 | 487716.4 | 89433.56 | 23334.93 | 275314.6 | 661203   | 707870.8 | 1174341  | 150810.7 | 500027.8 |
| 1723325  | 794649.4 | 63437.31 | 111672.4 | 217843.2 | 103441.2 | 2544222  | 2217155  | 811092.6 | 1118114  |
| 163448.9 | 97689.21 | 242445.9 | 204791.9 | 241292.7 | 328924.2 | 266543.4 | 107232.1 | 136380.2 | 84172.34 |
| 1319208  | 1082589  | 123465.5 | 41998.3  | 335076.7 | 341548.1 | 682412   | 416724.1 | 3017274  | 1763847  |
| 636514.1 | 672598   | 3264.805 | 8015.334 | 0        | 0        | 19214.01 | 1425014  | 11246.39 | 190238.7 |
| 811571.7 | 488728.9 | 121762   | 145903.1 | 138197.8 | 605608.6 | 666371.2 | 528930.8 | 286137.9 | 580649.9 |
| 389829.7 | 411544.9 | 6475.061 | 6148.733 | 3426.557 | 0        | 4784.373 | 827579.2 | 10048.64 | 40558.26 |
| 637871.8 | 672015.8 | 0        | 0        | 0        | 5335.8   | 35496.69 | 30437.21 | 478117.8 | 1245680  |
| 1100928  | 159728.1 | 792124.8 | 1017588  | 1000631  | 1045835  | 825291.7 | 1234977  | 844958.3 | 1084316  |
| 605740.7 | 516833.1 | 997743   | 856437.1 | 2429829  | 4231083  | 1205557  | 792427.9 | 67065.78 | 233583.2 |
| 847137   | 305362.7 | 0        | 0        | 0        | 17577.4  | 1342700  | 1118023  | 459774.8 | 626439.3 |
| 160949.7 | 110449.8 | 0        | 0        | 0        | 6297.192 | 207505.1 | 135347.2 | 0        | 191210.8 |
| 955536.4 | 874513.1 | 133854.3 | 156336.9 | 160632.6 | 142414.1 | 96034.44 | 67117.88 | 1095237  | 2203803  |
| 789033.4 | 363523.6 | 81062.6  | 36137.14 | 173260.8 | 1020222  | 407298.6 | 894097.8 | 558238.2 | 279244   |
| 72984.35 | 77340.93 | 0        | 3602.55  | 0        | 0        | 0        | 185493.6 | 0        | 0        |
| 1586957  | 961218.2 | 57849.83 | 40645.2  | 209265.4 | 905024.6 | 1740111  | 2220473  | 366787.2 | 837412.4 |
| 2117081  | 1751467  | 0        | 0        | 25143    | 471613.1 | 1797699  | 4416162  | 0        | 2118595  |
| 5888901  | 1107144  | 3407225  | 4692489  | 4498092  | 6076877  | 4795383  | 6117964  | 4828137  | 5130301  |
| 546797.6 | 335882.3 | 196012.2 | 216181.2 | 197296.2 | 304388   | 256151   | 384906.1 | 216063.1 | 355335   |
| 194060.8 | 231356.7 | 3388103  | 1622568  | 4014989  | 22588.83 | 279674.3 | 574726.9 | 18072.3  | 172799.2 |
| 26756.5  | 38479.96 | 77619.65 | 34448.12 | 204332.5 | 52428.95 | 88420.73 | 94694.22 | 14055.36 | 16017.03 |
| 140058.4 | 68037.78 | 118662.9 | 398165.6 | 619082.7 | 343790   | 160363.7 | 65799.01 | 179067.7 | 228913   |
| 264991.6 | 163068.4 | 0        | 0        | 3499.451 | 64707.14 | 349738.6 | 315757.2 | 22491.61 | 193237.7 |
| 329694.1 | 173046.4 | 36003.4  | 41054.09 | 68637.51 | 136322.5 | 411714.2 | 363869.5 | 90283.04 | 365301.8 |
| 19942419 | 20358045 | 316847   | 230079.5 | 276075.1 | 2063615  | 2184848  | 11386679 | 11917642 | 12807401 |
| 208953.8 | 126891.6 | 4273.632 | 4307.674 | 12358.76 | 4711.673 | 289380.5 | 325064.1 | 4379.281 | 301775.7 |
| 23055214 | 19727781 | 476983.6 | 451567.8 | 2490212  | 7571722  | 12578664 | 39474989 | 35784.51 | 6343330  |
| 3039483  | 2627549  | 605926   | 664273.2 | 624869.3 | 673659.8 | 424022.2 | 2325451  | 388661.2 | 1571536  |
| 5123664  | 2387765  | 792990.3 | 1910822  | 1937594  | 4559935  | 4388009  | 3956143  | 2675189  | 4100078  |
| 693312.2 | 745665   | 0        | 3810.15  | 0        | 0        | 0        | 1979628  | 54010.03 | 500027.4 |
| 2699823  | 2823260  | 64113.57 | 91213.5  | 104376.8 | 104276.6 | 25053.72 | 2189327  | 33340.18 | 653030.4 |
| 373553.5 | 112049.4 | 103262.3 | 107182   | 136497.9 | 124210.5 | 516857   | 177298.8 | 433077.9 | 392101.8 |
| 1010529  | 1076693  | 25483.11 | 10668.96 | 0        | 4568.424 | 13311.88 | 6549.796 | 2215628  | 2081626  |
| 4076503  | 2750457  | 430281.1 | 168430.1 | 857770.1 | 857538.6 | 4479167  | 7743653  | 1288857  | 1372229  |
| 1255569  | 324603.2 | 286393.5 | 275007.5 | 378251.7 | 1412628  | 1225232  | 1418633  | 1035195  | 914032.3 |
| 536336.4 | 403087   | 362114.9 | 1348974  | 883345.1 | 1905833  | 1062545  | 335570   | 175434.4 | 263365.2 |
| 2169436  | 1426698  | 14147.09 | 5857.117 | 43005.54 | 1501999  | 2102211  | 3815762  | 1567842  | 2921558  |
| 2654548  | 2631269  | 231903.4 | 240584.7 | 220370.8 | 301021.7 | 79115.65 | 58244.63 | 2560173  | 6450312  |
| 686845   | 710403.6 | 2607.624 | 0        | 11969.56 | 43775.83 | 82916.8  | 1038464  | 80198.7  | 531644.2 |
| 182993.4 | 136915.2 | 190867.6 | 217809.9 | 337267.3 | 613865.1 | 752596.2 | 391778.8 | 99131.47 | 228101.8 |
| 3837189  | 3159331  | 513215.1 | 588468.7 | 423332.5 | 660951.2 | 2361761  | 9051307  | 2451680  | 599356.8 |
| 5014922  | 3259905  | 27957.92 | 3367.053 | 82752.16 | 575355.5 | 6639988  | 9282415  | 288571.2 | 5387842  |
| 220126.5 | 82845.01 | 363464.3 | 1192708  | 625938.3 | 1484743  | 97971.59 | 218080   | 124334   | 172394.8 |
| 255781.3 | 78789.19 | 177778   | 200037.3 | 238273   | 148144.9 | 139736.5 | 382881.3 | 248077.1 | 184120.7 |
| 96620.97 | 78960.25 | 432659.4 | 280889   | 877443.8 | 2534881  | 597132.8 | 215366.7 | 9676.348 | 52272.35 |

|          |          |          |          |          |          |          |          |          |          |
|----------|----------|----------|----------|----------|----------|----------|----------|----------|----------|
| 122657.4 | 116027.3 | 0        | 18080.66 | 52180.67 | 0        | 6578.951 | 243077.1 | 0        | 24173.64 |
| 3009770  | 1484876  | 154201.7 | 330512.6 | 403934.7 | 974446.5 | 4125139  | 3277209  | 949603.6 | 2098658  |
| 278177.6 | 246122.6 | 0        | 0        | 9117.621 | 11286.21 | 222579.9 | 358602   | 155147.3 | 188875.5 |
| 245553.3 | 254214.4 | 13269.69 | 0        | 4875.743 | 35323.94 | 0        | 338943.8 | 7383.945 | 90607.65 |
| 2194029  | 1536067  | 166260   | 72694.88 | 149763.3 | 406377.9 | 2522803  | 4197985  | 285183.1 | 1102418  |
| 2695350  | 2818827  | 9194.025 | 6652.241 | 65219.26 | 50873.09 | 330937.7 | 6411425  | 1058259  | 5011701  |
| 8658120  | 9369706  | 10008.75 | 10181    | 7565.963 | 22929.72 | 0        | 0        | 19259469 | 18314200 |
| 421978.9 | 239145.2 | 47044.14 | 6603.267 | 50090.25 | 472748.8 | 270468.6 | 739330.1 | 171989.9 | 345902.1 |
| 7300434  | 1574347  | 4806399  | 6633548  | 6690012  | 4125013  | 6241148  | 9090717  | 5265692  | 6080026  |
| 4820.717 | 2800.405 | 61215.14 | 90830.99 | 290567.1 | 491239.2 | 10660.07 | 0        | 5214.239 | 5997.83  |
| 742666   | 309420.1 | 4487.928 | 6230.608 | 25162.49 | 41894.8  | 1158935  | 559757   | 367152.9 | 700637.6 |
| 2721795  | 2116468  | 129320.2 | 0        | 565432.9 | 1124565  | 1960204  | 5724126  | 0        | 2112093  |
| 21676190 | 22633562 | 42050.42 | 44928.37 | 574044.7 | 372538.9 | 3141913  | 55716822 | 9632390  | 33601849 |
| 1014335  | 874592.6 | 5500.583 | 2118.652 | 0        | 207299.7 | 792859.6 | 1633184  | 60933.04 | 671064.1 |
| 347980.3 | 372096.2 | 4240.37  | 5794.318 | 2727.747 | 6945.655 | 7102.054 | 562566.9 | 185082.9 | 77828.98 |
| 9810671  | 3181896  | 3989837  | 5778526  | 5286813  | 9937303  | 7917283  | 8758821  | 6450593  | 7891055  |
| 3377802  | 2361050  | 5654962  | 10378774 | 19384931 | 3255748  | 7238813  | 4654280  | 234816.8 | 2267242  |
| 241471.2 | 147252   | 878638.1 | 541670   | 1831016  | 5122242  | 1314655  | 380174.1 | 78742.81 | 104844   |
| 755157.1 | 226224.5 | 350110.4 | 559057.5 | 470607.8 | 746792.9 | 541639.9 | 707999.5 | 582223.9 | 590705.3 |
| 32040.24 | 64559.44 | 68072.41 | 98728.23 | 266518.9 | 600794.8 | 133918.7 | 8388.781 | 4454.492 | 0        |
| 956101.9 | 390594.7 | 286452.6 | 390333   | 210741   | 719081.1 | 1054337  | 1229102  | 596324.9 | 712099.2 |
| 114368.7 | 98800.83 | 33290.46 | 20213.76 | 25942.65 | 14438.1  | 23856.68 | 118518.4 | 5213.378 | 90294.82 |
| 4568500  | 3085866  | 1488145  | 572366.2 | 676325.2 | 3193944  | 2616216  | 9582290  | 2007344  | 2389537  |
| 358435.6 | 283390.9 | 166478.5 | 157350   | 131046.8 | 20617.77 | 13485.31 | 24594.67 | 603360   | 631122.7 |
| 51147533 | 7709097  | 29911771 | 43645363 | 38294867 | 54280726 | 42209853 | 52223013 | 41491957 | 47265243 |
| 3301369  | 1352079  | 468500.8 | 65134.32 | 3499225  | 801543.5 | 3173430  | 4085386  | 5221673  | 1941670  |
| 136052.2 | 74619.16 | 488193.9 | 299285.2 | 1168638  | 2826319  | 617724.7 | 200755.8 | 21479.93 | 100685.4 |
| 340980.7 | 280693.5 | 5664.204 | 0        | 11422.19 | 71230.47 | 303869.7 | 804108.9 | 145479.7 | 287859.3 |
| 61962.84 | 66632.56 | 0        | 0        | 0        | 0        | 4146.891 | 67318.35 | 0        | 6203.059 |
| 96479987 | 40440318 | 11058838 | 9288391  | 10236564 | 1.47E+08 | 142883.5 | 1.36E+08 | 88448780 | 1.05E+08 |
| 146011.5 | 115241.1 | 8104.697 | 0        | 27224.7  | 102606.5 | 59980.95 | 259184.1 | 11523.51 | 45291.23 |
| 404505.3 | 316154.8 | 0        | 2750.35  | 13003.22 | 283235.5 | 247529.2 | 227262.3 | 44725.17 | 275761.7 |
| 27109529 | 25968485 | 34756.13 | 12088.96 | 1186015  | 1907080  | 13366009 | 69403960 | 11366620 | 31675112 |
| 1618055  | 1112417  | 246418.1 | 42889.19 | 275723.5 | 324529.9 | 1779187  | 3276949  | 1102789  | 608419.3 |
| 687504.4 | 368178.7 | 182208.8 | 49820.57 | 191421   | 414722.5 | 739550.8 | 982484.8 | 272081.7 | 413551.3 |
| 252876.8 | 81844.65 | 0        | 8114.879 | 44318.52 | 8152.53  | 397792.7 | 310307.2 | 258211.9 | 317358.2 |
| 104967.7 | 53743.38 | 344574.3 | 236081.4 | 780828.6 | 60873.17 | 321422.7 | 183436.1 | 59096.51 | 138101   |
| 5245.613 | 8653.209 | 9595.735 | 215447.8 | 911680.8 | 226582   | 1491004  | 0        | 0        | 19938.21 |
| 124568.7 | 119725.8 | 0        | 0        | 0        | 18929.46 | 55589.81 | 111810.2 | 0        | 42515.87 |
| 281435   | 121320.3 | 12942.65 | 37920.37 | 204890.2 | 80494.16 | 338391.3 | 404068   | 112558.6 | 308734.3 |
| 303829.7 | 166357.9 | 477271.9 | 273917   | 1009446  | 399734.5 | 807515.2 | 538368   | 129991.6 | 319182.1 |
| 3557484  | 1594461  | 8924.983 | 0        | 21943.19 | 70586.32 | 5573062  | 4910968  | 1006481  | 3091273  |
| 254119.7 | 247123.9 | 16798.1  | 20093.94 | 30080.75 | 53703.04 | 18701.29 | 556608   | 0        | 71264.46 |
| 778286.1 | 438659   | 67596.63 | 11932.9  | 24872.8  | 450472.5 | 942481.6 | 1310205  | 213572.2 | 518627.1 |
| 31306228 | 5643445  | 17444580 | 22883042 | 23367217 | 33944216 | 25772583 | 30125694 | 24574418 | 30782796 |
| 2060815  | 1693251  | 0        | 4193.076 | 0        | 213071.7 | 2069536  | 4483849  | 480334.6 | 405294.6 |
| 13998.95 | 13491.82 | 30147.71 | 496107.4 | 2771984  | 339289.4 | 1618552  | 30153.8  | 0        | 0        |

|          |          |          |          |          |          |          |          |          |          |
|----------|----------|----------|----------|----------|----------|----------|----------|----------|----------|
| 688081.7 | 492763.7 | 93393.55 | 119042.6 | 142831.9 | 385741.5 | 436488.8 | 1153233  | 54589.57 | 265427   |
| 8706511  | 4774549  | 6145.445 | 6633.668 | 5928.452 | 633973.8 | 12903023 | 13413970 | 1324867  | 7302756  |
| 65613.75 | 103771.5 | 124846.6 | 860850.2 | 483192.3 | 1642271  | 119124.9 | 44008.4  | 0        | 27998.88 |
| 422886.4 | 440155.1 | 36132.02 | 20286.53 | 15388.14 | 24803.9  | 6535.33  | 1053112  | 20350.42 | 206734.8 |
| 498252.5 | 440842.6 | 5091.388 | 4665.459 | 0        | 61409.67 | 388375.5 | 1068301  | 71807.47 | 344851.6 |
| 653046.5 | 479719.7 | 3686.346 | 3436.979 | 0        | 87158.61 | 779351.2 | 1070863  | 80100.82 | 456584.6 |
| 20647.55 | 26398.44 | 165248.8 | 135159.9 | 445721.9 | 95812.17 | 11303.58 | 10820.97 | 0        | 16447.08 |
| 787500.3 | 729841.5 | 1160220  | 2942440  | 10387621 | 994714.8 | 10103827 | 1931775  | 345695.2 | 28635.85 |
| 89243.4  | 19666.14 | 39357.07 | 202530.3 | 426478.2 | 891611.3 | 351176.8 | 80881.23 | 92872.45 | 59774.88 |
| 54973.22 | 46696.4  | 291503.2 | 157785.3 | 560159.4 | 1604783  | 332195.3 | 67947.36 | 4731.051 | 7937.718 |
| 155167.9 | 81744.29 | 42824.05 | 20798.11 | 48477.28 | 102384.9 | 158609   | 209626.1 | 32804.52 | 113969.8 |
| 205818.4 | 122280.5 | 2571.552 | 10198.01 | 0        | 29823.48 | 287808.5 | 340749.4 | 38378.51 | 195329.5 |
| 185822.7 | 129398.8 | 90791.98 | 95059.18 | 67606.72 | 51340.99 | 34801.91 | 203557.9 | 41717.11 | 67590.15 |
| 1970020  | 2151311  | 8902.231 | 10708.32 | 8616.173 | 0        | 17469.78 | 27082.83 | 4521984  | 4055542  |
| 96232.69 | 45835.32 | 274257.7 | 401301.5 | 335294.9 | 1179974  | 150757.8 | 115477.1 | 104152.8 | 38103.93 |
| 1302625  | 639345.4 | 319791.9 | 266018.5 | 379354.1 | 1448283  | 828082.7 | 773919.6 | 487165.3 | 1522126  |
| 1974337  | 1954868  | 5788.22  | 7843.638 | 68782.3  | 82167.7  | 807544.6 | 3187505  | 529924.4 | 1242819  |
| 285568.2 | 289514.3 | 0        | 2953.209 | 8663.384 | 0        | 98423.71 | 488157.6 | 47484.14 | 194841   |
| 222588.6 | 138663.1 | 0        | 0        | 0        | 7577.524 | 315866.6 | 301527.9 | 5162.956 | 166151.5 |
| 2577574  | 2698295  | 191569.8 | 193886.9 | 159864.9 | 39939.57 | 18076.24 | 1009129  | 360470.2 | 1484911  |
| 1.39E+08 | 1.14E+08 | 15216305 | 8999144  | 30945766 | 32437713 | 85044668 | 3.04E+08 | 3567051  | 74104075 |
| 10741.26 | 8196.247 | 117515.3 | 136426.3 | 535131.1 | 946596.1 | 50557.28 | 11199.56 | 0        | 7250.239 |
| 363581.7 | 268393.3 | 91771.04 | 62420.54 | 41453.38 | 34075.5  | 339039.4 | 705742.9 | 0        | 518736   |
| 8781438  | 7889438  | 380565.3 | 355382.5 | 951010.5 | 3312074  | 3045894  | 7546372  | 452949   | 2961632  |
| 132551.7 | 81362.61 | 4375.27  | 0        | 8200.011 | 8058.835 | 184923.1 | 170767.4 | 5951.32  | 97439.64 |
| 10752812 | 2833705  | 4417583  | 6466171  | 7079273  | 11816959 | 8251811  | 9696173  | 7686219  | 9158479  |
| 302463   | 206708.6 | 645784   | 985825   | 298652.6 | 1105721  | 275445.5 | 565200.3 | 36676.14 | 159495.8 |
| 115168.6 | 106671.2 | 2858.401 | 10034.53 | 3325.573 | 45766.03 | 29833.94 | 0        | 129657.1 | 252190.8 |
| 849268.3 | 595287.6 | 265887.5 | 37970.98 | 196280.8 | 340937.4 | 673908.2 | 1744940  | 364375.3 | 337915.7 |
| 7721232  | 8503852  | 0        | 6475.538 | 6901.636 | 0        | 0        | 0        | 18597437 | 15038797 |
| 285405   | 310167.2 | 0        | 3168.869 | 0        | 17021.83 | 0        | 784154.7 | 0        | 108528   |
| 21418904 | 19742353 | 1109559  | 732950.4 | 1877006  | 13107085 | 617857.5 | 1557924  | 6159705  | 51412855 |
| 916055.8 | 877083.4 | 223662   | 187930.8 | 129475.9 | 15693.06 | 48099.7  | 34770.8  | 1416123  | 959240.7 |
| 4334570  | 2633892  | 406478   | 402855.1 | 750624.9 | 2727105  | 4465221  | 4502715  | 1012900  | 4585068  |
| 2082677  | 1166503  | 250830.6 | 96065.35 | 311512   | 2152220  | 1613181  | 3593311  | 850724.2 | 1610121  |
| 60494086 | 62190857 | 382866.3 | 949645   | 6427266  | 1043256  | 11953409 | 1.13E+08 | 1.4E+08  | 11759233 |
| 1449174  | 694376.2 | 24407.11 | 14693.66 | 26562.09 | 23125.5  | 2249272  | 2021584  | 416103   | 1625540  |
| 1957276  | 1886691  | 12714.77 | 2795.495 | 18173.48 | 85881.42 | 1114109  | 4384293  | 795428.6 | 3552325  |
| 20744110 | 9773909  | 314677.4 | 559177.5 | 1069778  | 3420807  | 31323293 | 24822894 | 5763987  | 16166829 |
| 883284.6 | 739704   | 0        | 0        | 9080.551 | 205948.2 | 785284.3 | 1268091  | 7385.914 | 209376.6 |
| 21024.43 | 15876.92 | 0        | 363098.2 | 2182467  | 334978.1 | 1241149  | 30907.76 | 0        | 7877.492 |
| 1092263  | 927734.6 | 4122.465 | 16406.09 | 24705.29 | 622050.1 | 572753.8 | 716697.2 | 572898.3 | 672134.9 |
| 4975939  | 3467115  | 63910.78 | 23335.87 | 150338.8 | 3325104  | 4634578  | 8038195  | 2730881  | 5549762  |
| 1989473  | 1590625  | 6084.289 | 11433.34 | 14052.91 | 11287.66 | 2254775  | 4293515  | 588912.6 | 845356.7 |
| 723105.9 | 373221.6 | 376647.1 | 495182.9 | 428416.5 | 437545.1 | 185680.9 | 1019780  | 278206.1 | 353170.8 |
| 113136.7 | 100236.5 | 0        | 0        | 4726.995 | 25335.96 | 80585.45 | 187716.3 | 11875.42 | 74998.33 |
| 634579.6 | 352069.5 | 109659.6 | 43602.88 | 155267   | 747560.5 | 313740.4 | 944000.8 | 205123.8 | 308011.4 |

|          |          |          |          |          |          |          |          |          |          |
|----------|----------|----------|----------|----------|----------|----------|----------|----------|----------|
| 46585.54 | 28301.31 | 143320.8 | 91322.71 | 75231.01 | 110322.3 | 24711.25 | 73340.73 | 70526.88 | 17509.8  |
| 4955615  | 4211818  | 1670894  | 2240895  | 593066.1 | 730460.2 | 553239.3 | 5089817  | 679533.3 | 1251473  |
| 1068423  | 668850.8 | 48414.1  | 17509.36 | 130625.9 | 1071143  | 764627.2 | 1253307  | 26484.5  | 834765.5 |
| 1491021  | 1116989  | 57751.35 | 27404.59 | 128296.7 | 959486   | 1123462  | 1111810  | 127626.3 | 1058253  |
| 295682.8 | 324269   | 2832.397 | 2646.027 | 4139.933 | 7200.948 | 0        | 418735.5 | 5386.972 | 59358.57 |
| 253535.1 | 280413.3 | 0        | 4303.767 | 0        | 0        | 0        | 445218.7 | 0        | 21087.26 |
| 80594.45 | 6792.024 | 115168   | 124746.4 | 149799.1 | 526567.5 | 266129.5 | 74495.75 | 90667.34 | 76075.6  |
| 14679625 | 13507418 | 403879   | 0        | 1038339  | 502404.1 | 10315433 | 34442765 | 4632.399 | 17995662 |
| 17772.65 | 36248.67 | 74489.73 | 99693.75 | 172322.8 | 518862.3 | 75119.36 | 0        | 0        | 6439.108 |
| 86317.64 | 70786.88 | 0        | 2289.319 | 2531.604 | 34558.98 | 68682.34 | 115211.1 | 0        | 96515.87 |
| 604496.3 | 507692   | 84786.41 | 59316.05 | 69107.96 | 117497.7 | 400840.4 | 1402853  | 92590.73 | 249356.2 |
| 13750207 | 3648208  | 6305426  | 10220033 | 8900064  | 14100730 | 10771544 | 12407980 | 9887350  | 12742397 |
| 19228015 | 6361589  | 5255652  | 9083417  | 9208516  | 21374809 | 15567781 | 16201439 | 13089307 | 15089185 |
| 283695.1 | 208762.8 | 0        | 0        | 0        | 0        | 363341.5 | 562963   | 18977.32 | 253984.9 |
| 618484.1 | 404777   | 88456.73 | 101069.8 | 51055.91 | 750542.1 | 87332.79 | 1083452  | 222686.6 | 203412.4 |
| 1142285  | 406045.9 | 856820   | 2583316  | 3053032  | 2162833  | 1244750  | 757582.7 | 1380680  | 1717938  |
| 8167.424 | 10422.73 | 150360.9 | 88465.3  | 287751.8 | 18267.06 | 9348.942 | 9317.666 | 6154.777 | 25364.68 |
| 573234   | 143918.2 | 774194.1 | 1203225  | 629312.3 | 813044.9 | 593500.7 | 424967   | 536809.1 | 483654.4 |
| 990919.6 | 211621.5 | 436105.2 | 655268.7 | 691980.3 | 980742.1 | 959529.8 | 1027737  | 659116.6 | 929577.4 |
| 914594.4 | 880823.7 | 106087.7 | 166524.5 | 113930   | 186103.7 | 49078.72 | 772805   | 70616.76 | 153705.4 |
| 4239760  | 2467001  | 0        | 0        | 5901.149 | 499947.5 | 6181670  | 7026647  | 565893.9 | 3341681  |
| 867919.6 | 844336.2 | 103767.5 | 122570.1 | 29995.73 | 159564   | 136948.9 | 554867.8 | 43479.99 | 1739967  |
| 90489.38 | 36115.97 | 316366.6 | 519980.5 | 84681.25 | 940240.8 | 142690.9 | 70499.8  | 61221.45 | 68127.61 |
| 411030   | 42924.86 | 680265.2 | 378864.7 | 553549.4 | 603852.5 | 413325.8 | 381455.2 | 371775.9 | 387936.6 |
| 224510   | 181049.2 | 6709.565 | 2579.816 | 39240.74 | 17468.17 | 219707.5 | 343148.6 | 58801.98 | 394200.6 |
| 3874559  | 4321291  | 0        | 0        | 0        | 0        | 0        | 5642226  | 10635907 | 0        |
| 38235317 | 24969352 | 5957276  | 3260113  | 10544745 | 16456128 | 38180153 | 50128125 | 1574542  | 27616612 |
| 610159.5 | 561946.5 | 151807.6 | 156291.5 | 142322.7 | 82335.75 | 0        | 1013427  | 5376.609 | 10520.19 |
| 310142.1 | 179480.9 | 39220.14 | 68140.31 | 83039.2  | 269647.4 | 242968.6 | 239831.6 | 26173.81 | 457454.5 |
| 225028.5 | 162603.1 | 24230.24 | 0        | 137322   | 29880.96 | 185124.5 | 320341.2 | 65257.02 | 128639.5 |
| 276871.8 | 197433   | 0        | 0        | 0        | 0        | 367785.9 | 539215.6 | 55668.94 | 394596   |
| 620548.8 | 293218.6 | 0        | 0        | 0        | 0        | 983141.4 | 997085.1 | 186261.4 | 556630.8 |
| 21779.05 | 20122.62 | 114718.4 | 18898.27 | 165317   | 257087.7 | 12959.12 | 50827.46 | 22445.24 | 6200.699 |
| 8604155  | 7353387  | 811949   | 493433.5 | 1927462  | 1943454  | 4944785  | 2538830  | 20028803 | 11923597 |
| 1237747  | 997129   | 98537.37 | 52279.42 | 528698.9 | 850230.4 | 173809.8 | 2270128  | 70861.6  | 284261.7 |
| 721366.3 | 490159.5 | 84432    | 86133.34 | 330103.7 | 388301.3 | 504496.2 | 1223083  | 124974.7 | 390222.9 |
| 28842.75 | 27674.77 | 135616.6 | 56080.72 | 136048.5 | 402594   | 53829.46 | 71130.9  | 0        | 8737.113 |
| 1969204  | 2190395  | 6467.944 | 10638.85 | 5104.929 | 22037.61 | 16524.19 | 5112169  | 3442344  | 281918   |
| 1917754  | 1933222  | 64094.96 | 51817.51 | 111901.7 | 168813.4 | 566483.8 | 399736   | 4881469  | 2887572  |
| 136964.4 | 113902.8 | 4622.557 | 0        | 8545.396 | 8196.44  | 137854.6 | 210862.2 | 0        | 66423.44 |
| 3537804  | 2776596  | 35819.17 | 41087.74 | 60139.16 | 56798.38 | 4162447  | 7473904  | 1008597  | 1648525  |
| 354254.1 | 267759.5 | 85557.95 | 168328.5 | 164693.6 | 90210.16 | 68746.05 | 354788.9 | 98394.69 | 84761.85 |
| 805113.9 | 732204.3 | 9883.644 | 10234.29 | 51291.78 | 220968.8 | 462617.5 | 1459348  | 99455.71 | 523420.9 |
| 3930316  | 3046519  | 672266.1 | 94185.04 | 924550.8 | 1087129  | 3150673  | 7684999  | 325301.9 | 1361349  |
| 943169.9 | 322656.8 | 712555.3 | 2847639  | 4039738  | 1813083  | 1234870  | 669810.1 | 1107070  | 1384668  |
| 243258.9 | 63447.76 | 73361.02 | 145558.4 | 188278.1 | 240871.5 | 211157.1 | 303718.2 | 184185.9 | 313724.6 |
| 496664.2 | 364779.5 | 767019.7 | 549656.7 | 1057541  | 2804312  | 1325616  | 739996.1 | 31348.2  | 396985.7 |

|          |          |          |          |          |          |          |          |          |          |
|----------|----------|----------|----------|----------|----------|----------|----------|----------|----------|
| 371124.9 | 408464.9 | 0        | 2433.901 | 3617.361 | 6183.472 | 24544.54 | 591409   | 16872.08 | 272446.9 |
| 1664568  | 1769544  | 36412.16 | 32846.75 | 69128.65 | 14251.78 | 292561.1 | 151709.6 | 4513970  | 2166918  |
| 2812026  | 265826.9 | 409460.4 | 548335.1 | 533696.5 | 3442707  | 2719073  | 2782540  | 2854094  | 2753702  |
| 879774.6 | 676496.5 | 221164.8 | 363805.6 | 81025.01 | 614512.2 | 90044.3  | 666629   | 1818860  | 1311576  |
| 252709.2 | 261483   | 9413.811 | 9822.958 | 38261.28 | 9852.768 | 32250.17 | 21144.48 | 387437.2 | 129745.3 |
| 98049.58 | 89001.88 | 18784.7  | 29064.33 | 0        | 19575.76 | 26801.24 | 123446.1 | 0        | 28196    |
| 55175676 | 35548434 | 18583729 | 6323322  | 35060199 | 3958395  | 47968519 | 74801266 | 0        | 81746088 |
| 283881.4 | 128091.7 | 535483.2 | 496386   | 457510.1 | 163707.1 | 715767.3 | 144560.7 | 387895.5 | 178586.1 |
| 669146.8 | 293167.9 | 259836.4 | 995383.2 | 1740833  | 2028105  | 1454022  | 910310.2 | 435822.7 | 320920.8 |
| 233398   | 188526.6 | 143205.3 | 255900.1 | 650497.5 | 715403.7 | 790989.3 | 368061.8 | 119768.4 | 91325.13 |
| 2329984  | 979281.3 | 1165506  | 861551.9 | 832484   | 2416558  | 1658820  | 3635187  | 1739932  | 1306714  |
| 905478.5 | 437480.7 | 331278.8 | 252230.2 | 279824.5 | 571616.5 | 975558.2 | 555802.6 | 401457.1 | 885500.2 |
| 3464011  | 3174091  | 339108.3 | 84226.45 | 982928.8 | 67454.53 | 1733333  | 8771557  | 555360.7 | 1588082  |
| 4408387  | 1881900  | 1237676  | 1048736  | 2014782  | 2876829  | 5074433  | 5067196  | 6530217  | 5567891  |
| 10109596 | 4197859  | 2323799  | 5125322  | 4353559  | 10311404 | 7759717  | 8205548  | 5794181  | 7749668  |
| 671037.2 | 721058.2 | 2277.022 | 3437.221 | 48668.45 | 66964.13 | 30879.25 | 1631956  | 12209.41 | 251956   |
| 2560855  | 1942712  | 16566.75 | 5732.586 | 0        | 215877.4 | 3122568  | 2605150  | 4229.214 | 1967728  |
| 2170732  | 608958.8 | 866249.3 | 1301729  | 1237171  | 2342480  | 1825648  | 2084829  | 1557637  | 1768888  |
| 718279.9 | 570007.4 | 48145.27 | 33060.23 | 22353.31 | 124660.9 | 735836.8 | 1399792  | 49797.31 | 422192.4 |
| 320383.9 | 304351.1 | 720911.1 | 537392.3 | 1066711  | 143184.3 | 1154704  | 606560   | 162504.7 | 69976.43 |
| 199747.4 | 224482.3 | 0        | 3048.866 | 0        | 0        | 0        | 137410.6 | 0        | 8223.179 |
| 420430.5 | 306736.2 | 118138.2 | 35329.54 | 69473.77 | 266462.6 | 243801.6 | 301109   | 57345.63 | 265242.2 |
| 19053615 | 12574963 | 2069333  | 1246315  | 6184676  | 3159877  | 22019654 | 35019666 | 6816567  | 5633564  |
| 429516.5 | 353067.3 | 60438.9  | 72195.29 | 205648.6 | 53893.28 | 189452.7 | 114944.4 | 53134.43 | 404433   |
| 161331.5 | 146994.7 | 8380.417 | 3103.545 | 5938.9   | 52360.67 | 84370.47 | 117117.2 | 24367.21 | 200004.6 |
| 334730.5 | 212938.7 | 223310.4 | 710900.4 | 520972.1 | 892433   | 606829.6 | 328930.4 | 69279.03 | 204927.7 |
| 605030.5 | 385990.9 | 5485.008 | 3226.225 | 47786.38 | 172341.6 | 791911.8 | 948383.1 | 85088    | 433510.3 |
| 17997732 | 12003322 | 90810.18 | 59499.3  | 403022.2 | 3404326  | 23917230 | 23475641 | 2131860  | 9674459  |
| 21165.99 | 23554.09 | 0        | 126079.3 | 824006.3 | 348678.7 | 1470776  | 0        | 0        | 13282.66 |
| 5802110  | 4009296  | 427929.1 | 918578   | 564442.7 | 1205848  | 6721803  | 11207332 | 843397.4 | 3037801  |
| 368786.6 | 351955.3 | 32106.24 | 21788.13 | 13124.28 | 102262.4 | 116288.5 | 515615.7 | 4525.97  | 80419.55 |
| 550730.6 | 247994.7 | 11813.18 | 2942.774 | 5383.093 | 11208.48 | 878859.6 | 591648   | 183656.2 | 498336.3 |
| 424597.8 | 337467.5 | 0        | 0        | 0        | 39678.3  | 487653   | 532585.4 | 38265.67 | 210482.5 |
| 1038194  | 751583.9 | 43766.05 | 39226.54 | 75444.72 | 568352.8 | 984894.2 | 1541472  | 163072.2 | 661493.3 |
| 45593930 | 8471541  | 25509863 | 35153154 | 34431582 | 48644773 | 37915235 | 48202871 | 35392036 | 41681335 |
| 345903.6 | 204292.3 | 41398.22 | 2478.394 | 115320.6 | 80291.79 | 438905.8 | 263004.3 | 164012.1 | 179868.1 |
| 148973.7 | 127903.5 | 0        | 8074.471 | 0        | 72441.09 | 94945.56 | 279671.7 | 24857.21 | 7846.193 |
| 10411838 | 6067257  | 76661.59 | 31031.94 | 266386.1 | 3635348  | 14354036 | 14671207 | 1397996  | 7372033  |
| 7554964  | 4386462  | 3452948  | 4807043  | 4223654  | 3767505  | 2143137  | 7141445  | 2791129  | 3798030  |
| 384483.4 | 35116.66 | 298870.8 | 348512.1 | 343866.7 | 407704.1 | 303081.3 | 377030.3 | 338860.5 | 381211.2 |
| 351914   | 366283.7 | 808176.9 | 839170.2 | 1483187  | 361540.8 | 489843.1 | 0        | 43442.72 | 796142.4 |
| 230463.9 | 166113.4 | 0        | 0        | 0        | 162258.4 | 210122.6 | 163130.5 | 207093.9 | 175943.7 |
| 1374910  | 202869.8 | 984306.3 | 1152830  | 1258236  | 1428205  | 942363.5 | 1315609  | 1191285  | 1187982  |
| 169602.5 | 176821.6 | 107187.6 | 373227.1 | 270213   | 575545.2 | 552178.6 | 192774.5 | 24797.18 | 73444.54 |
| 283835.7 | 238216.6 | 9341.742 | 8367.815 | 22480.26 | 61749.06 | 248459.2 | 400875.7 | 10953.62 | 112093.1 |
| 208695.4 | 106568.8 | 314215.9 | 439643.4 | 188876.2 | 790838.7 | 340801.7 | 68811.86 | 235908.8 | 210092.9 |
| 2334514  | 1674403  | 2930.04  | 10798.66 | 4166.808 | 163314.2 | 3069395  | 3063469  | 303794.4 | 1229961  |



|          |          |          |          |          |          |          |          |          |          |
|----------|----------|----------|----------|----------|----------|----------|----------|----------|----------|
| 393555.4 | 419402.3 | 24869.82 | 31252.44 | 29783.94 | 14113.72 | 20301.94 | 317012   | 54634.92 | 89659.85 |
| 435690.8 | 181945.6 | 25921.46 | 2821.562 | 34830.7  | 534070.6 | 381036   | 702584.6 | 421488.8 | 221538   |
| 8149090  | 9065782  | 25461601 | 14996499 | 34194593 | 4168297  | 18468399 | 23641097 | 145062.1 | 7598160  |
| 796297.8 | 596896.4 | 34835.37 | 26239.87 | 65015.36 | 533463.6 | 616224.3 | 655502.8 | 51835.35 | 524041.6 |
| 350158.7 | 387783.3 | 0        | 8469.54  | 5697.494 | 5251.48  | 23851.09 | 695733.5 | 47476.03 | 151851.5 |
| 573139.1 | 218057.5 | 92215.89 | 285622.8 | 212787.8 | 594675.5 | 507788.3 | 448187.6 | 281479.4 | 570355.8 |
| 6888728  | 7824220  | 0        | 0        | 0        | 0        | 0        | 16906274 | 13598162 | 617607.6 |
| 705269.3 | 626693.6 | 0        | 4876.493 | 48147.49 | 193332.2 | 502178.6 | 1345361  | 0        | 866054.3 |
| 926030.4 | 746814.3 | 248912.6 | 347800.4 | 273132.9 | 380760.5 | 93150.72 | 959084.4 | 93162.18 | 281429.9 |
| 2460439  | 1483798  | 206361.6 | 146971.1 | 429145.4 | 1546161  | 2710025  | 2866966  | 536452.6 | 1299925  |
| 2507676  | 1300635  | 308416.3 | 99922.35 | 533403.4 | 2578120  | 2233535  | 3693954  | 1103719  | 2200118  |
| 3177582  | 3585043  | 24390.64 | 44130.01 | 43768.83 | 17141.56 | 0        | 0        | 7570152  | 6520168  |
| 525962.5 | 339566   | 24892.46 | 29901.56 | 82567.99 | 381322.1 | 504264.4 | 543249.6 | 362698   | 234350.1 |
| 190382   | 142052.4 | 135330.4 | 174603.5 | 870948.3 | 1605442  | 821036.7 | 234259.2 | 87876.16 | 102401.7 |
| 416749.8 | 367111.2 | 4637.134 | 19871.05 | 32687.72 | 99976.37 | 302332.1 | 851232.7 | 57423.25 | 96191.81 |
| 162929   | 133602.7 | 16978.18 | 30936.82 | 37848    | 42665.28 | 98426.2  | 129815.6 | 14929.55 | 68101.02 |
| 3318650  | 3689654  | 102639.4 | 101975.2 | 112832.7 | 55355.51 | 21885.37 | 0        | 8245523  | 6204531  |
| 19764826 | 22383905 | 80171.24 | 113318   | 113527.2 | 53971.01 | 193787.7 | 133967.2 | 48505351 | 38548965 |
| 713729.3 | 576000.7 | 6594.931 | 2380.304 | 60897.37 | 481258.5 | 446272.9 | 1110941  | 91702    | 577144.9 |
| 718276.8 | 732820.2 | 49627.79 | 44954.77 | 73308.55 | 28225.29 | 178589.6 | 372647.1 | 72222.15 | 134335.4 |
| 704754.9 | 297916   | 468825.8 | 1621398  | 1740620  | 1486114  | 771989.2 | 403171.4 | 854084.4 | 1149024  |
| 8292030  | 5657973  | 453424.4 | 272655.5 | 660448.4 | 1885885  | 10375549 | 15662531 | 2479457  | 3977605  |
| 106384.8 | 82063.07 | 0        | 0        | 0        | 74827.92 | 83445.92 | 218878.9 | 4716.483 | 68953.13 |
| 337532.7 | 362453.5 | 11509.64 | 44736.71 | 15879.18 | 13866.11 | 12449.18 | 564529.7 | 10590.28 | 121190.4 |
| 1956274  | 1468508  | 45567    | 97522.73 | 774765.3 | 1018178  | 1328818  | 1521731  | 1095247  | 4530067  |
| 138575.6 | 71175.06 | 61603.36 | 40326.39 | 126630.9 | 0        | 117124.8 | 177292.1 | 50629.55 | 111862   |
| 9752655  | 3293740  | 3684721  | 5020891  | 5257837  | 9335477  | 9148042  | 8495264  | 6198638  | 8576840  |
| 1154235  | 1306433  | 0        | 2523.184 | 0        | 22622.84 | 22267.72 | 1261704  | 53690.62 | 725103.7 |
| 181277.1 | 128744.7 | 2730.318 | 0        | 3716.144 | 150162   | 148384.7 | 316273   | 40376.2  | 109469.6 |
| 2598674  | 2084709  | 173684.5 | 119061.2 | 455260.1 | 1054824  | 1967984  | 5752902  | 122985.6 | 1951709  |
| 10239653 | 11049453 | 145255.3 | 166926.4 | 179027.9 | 1186443  | 1152237  | 1211472  | 22982191 | 21571970 |
| 10455461 | 1191467  | 5502774  | 7547362  | 7668159  | 12323270 | 7995369  | 10501185 | 9011270  | 10655212 |
| 334182.4 | 217750.8 | 218204.3 | 718488.4 | 518902.1 | 916752.2 | 609191.7 | 297956.3 | 59716.36 | 221180.3 |
| 7613975  | 4783850  | 1162952  | 679244.4 | 3134723  | 3949196  | 7324453  | 13757719 | 2205481  | 3602461  |
| 41517772 | 47278890 | 307055.1 | 323627   | 315367.6 | 200846.7 | 121340.2 | 33550.81 | 1.01E+08 | 82380574 |
| 256277.5 | 174423.5 | 89456.54 | 70758.19 | 61101.76 | 7355.908 | 258871.9 | 410422.8 | 30414.81 | 241095.6 |
| 152296.2 | 154018.3 | 4018.226 | 17808.53 | 23033.11 | 8489.731 | 36192.32 | 48996.37 | 234806.5 | 385524.7 |
| 1109831  | 981018.9 | 7631.237 | 2351.579 | 523077.3 | 26943.2  | 679046.8 | 2575756  | 551453.5 | 1564831  |
| 55719.77 | 45315.98 | 176192.9 | 89981.26 | 414371.7 | 57067.04 | 156680   | 51518.21 | 11909.47 | 32350.33 |
| 41887418 | 47859782 | 188639.8 | 200327.5 | 129458.3 | 63339.33 | 83166.3  | 62243.13 | 96411272 | 90699168 |
| 359318.1 | 293320.3 | 69001.44 | 53549.22 | 278507.4 | 104023.6 | 0        | 416458.4 | 45707.57 | 63704.09 |
| 6650825  | 5114705  | 953012.4 | 1290164  | 1326801  | 4096386  | 3217182  | 11614299 | 236357   | 2682612  |
| 1082149  | 1229777  | 14224.81 | 0        | 6931.553 | 9469.076 | 18352.37 | 0        | 2824352  | 1873728  |
| 363999.1 | 291210.8 | 5293.591 | 7494.151 | 16505.03 | 0        | 427591.9 | 723167.2 | 104419.7 | 180642.2 |
| 631651.1 | 536921.2 | 39129.51 | 153700.7 | 60737.53 | 441778.7 | 111759   | 347478.4 | 114884.2 | 274492.5 |
| 1473369  | 1405864  | 210429.4 | 253240.5 | 244740.8 | 366744.5 | 167859.9 | 103603   | 1641270  | 3558589  |
| 2721570  | 3054224  | 0        | 4205.36  | 0        | 69057.14 | 232309.7 | 6659002  | 0        | 122428.3 |

|          |          |          |          |          |          |          |          |          |          |
|----------|----------|----------|----------|----------|----------|----------|----------|----------|----------|
| 417835.8 | 398932.9 | 3514.203 | 2888.419 | 3942.995 | 0        | 324984   | 943565.2 | 67135.71 | 103546.6 |
| 160123.9 | 183975.2 | 0        | 0        | 0        | 0        | 0        | 140616   | 0        | 61008.38 |
| 413428   | 87113.84 | 572233.3 | 770232.4 | 639434.5 | 1993207  | 689464.3 | 441928.1 | 388927.8 | 284839.5 |
| 145608.8 | 124130.6 | 17855.98 | 0        | 12246.62 | 13177.36 | 133421.9 | 340837.8 | 32061    | 49104.4  |
| 4194329  | 2379742  | 435078.2 | 338677.2 | 737171.5 | 2958908  | 4678786  | 4954208  | 911650   | 4307201  |
| 283923.1 | 201276.3 | 115874.8 | 128396.1 | 138067.9 | 85903.41 | 76264.96 | 136033.4 | 100648.3 | 180145.4 |
| 3917623  | 1484285  | 1398147  | 2042580  | 2227221  | 3873221  | 3102632  | 3103170  | 2415825  | 3430905  |
| 1.36E+08 | 1.14E+08 | 15566390 | 9123596  | 31359376 | 40175352 | 85779781 | 3.04E+08 | 3482254  | 75723572 |
| 3042467  | 2451113  | 7998.362 | 6871.044 | 59785.87 | 1464536  | 2693938  | 4419157  | 69952.59 | 901092   |
| 5318547  | 2661746  | 142274.4 | 129079.5 | 2691564  | 841483.4 | 7285477  | 9311837  | 2881019  | 3157046  |
| 431509.9 | 117945.4 | 220785.4 | 289561.4 | 299624.6 | 506190.6 | 174053.7 | 472553.2 | 332056.1 | 433515   |
| 215160.6 | 141232.9 | 0        | 0        | 2667.61  | 36049.16 | 298593.8 | 327949.8 | 14761.72 | 185314.8 |
| 30158212 | 17429031 | 247129.2 | 136176.5 | 754185.1 | 10673488 | 42283811 | 42741431 | 4395375  | 21353864 |
| 623703.7 | 114402.4 | 786380.4 | 958074.4 | 809055   | 1043913  | 485739.9 | 704569.7 | 713841.3 | 535618.3 |
| 227206   | 171161.3 | 35631.35 | 52410.51 | 36334.89 | 102323.4 | 161791.2 | 229726.3 | 131994.7 | 94648.08 |
| 780802.1 | 123178   | 632268.9 | 389167.1 | 637458.7 | 820825.1 | 661157.4 | 780279.3 | 656821.7 | 677506.4 |
| 12130334 | 1681835  | 6908639  | 8611268  | 8874434  | 13024016 | 11600455 | 13711389 | 9363739  | 11935067 |
| 215405.9 | 109932.2 | 359142.7 | 413269.6 | 115954.7 | 597512.1 | 392074.2 | 126213.5 | 137606.7 | 171059.3 |
| 171223.4 | 126099.6 | 0        | 16826.37 | 11950.84 | 137427.8 | 121898.5 | 376696.1 | 36493.82 | 124727.2 |
| 877221.3 | 308806.8 | 149819   | 91038.95 | 308758.4 | 1001269  | 834158.8 | 396523.1 | 1246435  | 925061   |
| 325608.2 | 189188.3 | 12315.01 | 2477.482 | 18047.55 | 114109.2 | 451070.9 | 473102.3 | 197479.5 | 341754.8 |
| 5242980  | 4153860  | 119007.9 | 103987.6 | 537736.1 | 378457   | 5946881  | 7028047  | 10769809 | 1691670  |
| 9242855  | 5509518  | 46138.83 | 30197.76 | 191385   | 2646082  | 13088228 | 13454933 | 1097927  | 6249983  |
| 2880466  | 2055226  | 20998.31 | 2584.552 | 45772.07 | 516233.7 | 3730633  | 3594493  | 365496.3 | 1387637  |
| 400644.7 | 230394.1 | 30709.22 | 127425.3 | 124804.6 | 357034.6 | 308368.9 | 266535.3 | 133672.4 | 365340.6 |
| 25073.85 | 22224.39 | 100021.6 | 153631.7 | 61336.56 | 30241.41 | 20424.38 | 7040.549 | 63679.76 | 14930.46 |
| 3554438  | 3748697  | 0        | 0        | 0        | 21438.66 | 1529927  | 9476824  | 0        | 3961251  |
| 396524.7 | 259574.3 | 608014   | 987806.2 | 2773511  | 309826.8 | 1503208  | 748879.5 | 39843.25 | 483123.7 |
| 2014976  | 1831660  | 20571853 | 11993794 | 33486898 | 230900.5 | 2736280  | 4755811  | 173626.6 | 2917573  |
| 1393245  | 541516.6 | 1440472  | 1750794  | 1679844  | 2828219  | 2222309  | 2206736  | 1393543  | 1181976  |
| 146812.4 | 101664.2 | 203587.4 | 92376.11 | 288537.7 | 448646.4 | 606073   | 298852.2 | 66944.91 | 186534.2 |
| 38531.51 | 36183.81 | 255058.1 | 82652.98 | 321283.8 | 851104.2 | 62879.7  | 86152.92 | 9013.325 | 22450.7  |
| 506058.5 | 479432.4 | 3099.433 | 0        | 24605.84 | 289395.5 | 137333.2 | 73564.89 | 1253210  | 701716.9 |
| 765633.2 | 811672.1 | 2395.065 | 0        | 11619.99 | 137213.4 | 172414.4 | 230026.3 | 2023932  | 1152370  |
| 1009851  | 1141343  | 11076893 | 6255625  | 18878635 | 754207   | 959444.5 | 2688094  | 45080.5  | 1699647  |
| 5694551  | 5278787  | 821722.6 | 213382.8 | 1183297  | 865780.4 | 2608996  | 13244985 | 0        | 8237397  |
| 21687073 | 24308812 | 156476.5 | 153100.7 | 138937.5 | 1447894  | 1728067  | 11111592 | 9195028  | 14087398 |
| 301024   | 143852.9 | 4509.883 | 10646.17 | 16515.27 | 243350.2 | 375856.3 | 290816.1 | 202281.7 | 245915.9 |
| 83670.72 | 92722.1  | 7230.159 | 5299.097 | 0        | 0        | 6346.245 | 50787.07 | 31644.42 | 46279.17 |
| 136275.4 | 104015.7 | 7619.665 | 57638    | 39422.08 | 94490.9  | 31435.6  | 51985.23 | 34117.11 | 258292.6 |
| 258599.5 | 190941.3 | 4443.633 | 0        | 40815.88 | 20844.18 | 320437.2 | 370052.3 | 47254.49 | 142403.1 |
| 949280.4 | 1103204  | 0        | 0        | 0        | 0        | 0        | 2665076  | 811187.1 | 0        |
| 44960.85 | 46159.15 | 0        | 187712.1 | 1670014  | 292827.2 | 1731307  | 27957.21 | 83092.56 | 6494.206 |
| 89062.2  | 37579.53 | 240937.6 | 306280.2 | 295380.9 | 63718.49 | 63977.18 | 62164.99 | 101387.2 | 83944.56 |
| 11389041 | 13173459 | 47935.82 | 38296.08 | 28045.9  | 47839.55 | 187589   | 767290   | 28645954 | 22283212 |
| 388277.1 | 327044.1 | 0        | 0        | 60172.53 | 152182.2 | 303934.6 | 303088.5 | 187585.8 | 964823.9 |
| 378247.9 | 269877.2 | 487802.3 | 278665.5 | 900641.3 | 1523905  | 847212   | 514505.4 | 117858.5 | 59402.66 |

|          |          |          |          |          |          |          |          |          |          |
|----------|----------|----------|----------|----------|----------|----------|----------|----------|----------|
| 26102275 | 4638991  | 17506939 | 20786237 | 19236353 | 28633129 | 20283097 | 29749710 | 20328797 | 23125548 |
| 336584.6 | 390898.6 | 0        | 0        | 0        | 5209.217 | 0        | 814254.3 | 0        | 41383.88 |
| 2975451  | 2180089  | 571514.2 | 462533   | 626657   | 386307.2 | 3092036  | 6176814  | 22517.42 | 2791444  |
| 2339348  | 1281577  | 5974.805 | 10795.64 | 16086.82 | 83025.94 | 3661599  | 3726280  | 351074.2 | 1979289  |
| 186960   | 178225.2 | 42809.7  | 55604.89 | 22309.22 | 13898.75 | 35484.96 | 460263.8 | 5267.308 | 53739.59 |
| 88614.68 | 46119.66 | 286205.4 | 160956   | 578312.4 | 1761637  | 422358.9 | 97648.64 | 37889.5  | 159930.6 |
| 2188346  | 2246272  | 2456797  | 7958522  | 27457513 | 3527166  | 13223511 | 4626903  | 15071.48 | 32102.25 |
| 71625.76 | 54974.19 | 134148.7 | 48284.7  | 125463.9 | 228445   | 383469.8 | 138359   | 18857.69 | 55336.31 |
| 635096.4 | 297628.1 | 146205.9 | 161274.3 | 259264.6 | 639072   | 538432.2 | 431070.5 | 389152.4 | 435747.2 |
| 310423.7 | 194653.2 | 112964.6 | 154878.9 | 159689.7 | 172069.3 | 118711.2 | 470695.6 | 131605.9 | 68641.27 |
| 2991395  | 2068364  | 747930.3 | 428005.1 | 1720891  | 547112   | 2480493  | 5905992  | 68865.84 | 2906559  |
| 263865.6 | 302124.8 | 6563.947 | 3819.513 | 3081.245 | 8169.851 | 4627.47  | 530970.3 | 0        | 20300.74 |
| 305310.5 | 304738.3 | 0        | 3020.394 | 0        | 66840.15 | 150517.1 | 420589.1 | 24281.8  | 183908.9 |
| 105865.4 | 45322.48 | 0        | 0        | 0        | 0        | 175431.8 | 122284.6 | 106143.2 | 72914.64 |
| 301881.4 | 275480.4 | 19016.6  | 30169.15 | 66509.17 | 105888.1 | 108599.4 | 90122.44 | 459139.8 | 714143.6 |
| 270263.9 | 277984.6 | 2286.791 | 7316.919 | 25482.94 | 60724.38 | 66323.66 | 80850.15 | 35872.44 | 128402.5 |
| 326896.3 | 174454.9 | 14694.46 | 14499.58 | 61126.33 | 217601.1 | 405598.1 | 175560.8 | 521728   | 129098.6 |
| 124287.1 | 112415.9 | 2666.182 | 5893.877 | 5445.429 | 62279.7  | 62724.16 | 61031.51 | 0        | 81116.72 |
| 351203.9 | 87793    | 172847.1 | 186574.6 | 225074.3 | 387401.2 | 307087.2 | 363743   | 253011.6 | 322453.9 |
| 245094.5 | 269063.7 | 0        | 0        | 7537.744 | 6743.341 | 61942.1  | 675272.1 | 4140.349 | 60478.34 |
| 1066371  | 707886.8 | 26935.11 | 25911.68 | 54045.76 | 140443.1 | 1478024  | 1310825  | 55196.56 | 1147644  |
| 39166567 | 45586990 | 302083   | 309214   | 122277.1 | 296304.8 | 180061.5 | 74444    | 1.02E+08 | 71767535 |
| 9850685  | 11146141 | 47082.5  | 20665.02 | 73649.71 | 842968.1 | 697023.2 | 5066857  | 4107644  | 6190656  |
| 144880.1 | 60094.88 | 64275.44 | 47993.29 | 25352.26 | 113626.2 | 163404.5 | 140389.4 | 82361.46 | 109421.2 |
| 41102742 | 47959198 | 219761.6 | 207531.7 | 207669.3 | 152775.4 | 66795.01 | 52960.4  | 1.11E+08 | 69889616 |
| 2383451  | 1429905  | 3619.262 | 5903.091 | 23715.56 | 361562.3 | 3542472  | 3889828  | 488803.2 | 1901487  |
| 100759.1 | 77781.94 | 0        | 4172.916 | 0        | 0        | 129845.6 | 177129.4 | 0        | 51415.72 |
| 30084277 | 30389900 | 870431.8 | 0        | 1345481  | 877595.4 | 17404440 | 76359493 | 0        | 34684125 |
| 240106.2 | 162313.8 | 65834.44 | 61199.03 | 70570.3  | 106026.6 | 197944.3 | 278169.9 | 22794.95 | 125755.5 |
| 174930.2 | 107253.6 | 7535.886 | 55507.66 | 40808.38 | 101883.6 | 180455.9 | 54799.31 | 81356.76 | 183720.9 |
| 9316363  | 5951327  | 5986717  | 19414105 | 14075272 | 25388763 | 16972633 | 8993568  | 2529482  | 5606707  |
| 2705724  | 2432243  | 185272.4 | 180644.2 | 392677.8 | 475546.9 | 1883854  | 6336680  | 696905.9 | 3345032  |
| 1316705  | 923497.9 | 0        | 0        | 0        | 0        | 1871695  | 2646678  | 84457.18 | 1336567  |
| 32030.91 | 31758.04 | 208449.4 | 91137.86 | 232813.8 | 822667.9 | 98981.21 | 65618.99 | 5474.363 | 9616.878 |
| 237682   | 273961.6 | 4007.913 | 0        | 0        | 4278.217 | 14674.75 | 582285.9 | 11873.59 | 69616.07 |
| 1680209  | 873931.8 | 1337240  | 6364975  | 2853327  | 6435899  | 1932874  | 2612614  | 1337020  | 1009566  |
| 1297015  | 411716.7 | 1897169  | 1288133  | 1605131  | 6110914  | 5878645  | 2020572  | 1029835  | 1049769  |
| 401457.8 | 162137.7 | 219822   | 89434.76 | 255935.7 | 99031.34 | 484220.9 | 142589.9 | 509788.7 | 504703.7 |
| 2680658  | 1343013  | 26368.61 | 12405.35 | 20697.39 | 34138.01 | 4331544  | 4243172  | 741916.6 | 2855572  |
| 8498896  | 9891394  | 134422.3 | 169336.6 | 147028.3 | 30407.15 | 18086.39 | 739757.5 | 20640250 | 17876965 |
| 352241.9 | 281959.3 | 9105.886 | 0        | 33211.31 | 108798   | 361486.3 | 486022.8 | 10174.51 | 209083.3 |
| 153920.2 | 138257.1 | 84199.34 | 312995.1 | 439214.1 | 255904.7 | 661670.7 | 234280.3 | 84526.55 | 73457.18 |
| 183396.9 | 175370.2 | 309761.5 | 326476.2 | 1016407  | 2211281  | 472097   | 327040   | 9906.038 | 68948.45 |
| 33349636 | 5842974  | 20091067 | 28889888 | 25322118 | 35220545 | 26976614 | 34955751 | 26207608 | 30046540 |
| 313493   | 359164.7 | 2413.294 | 0        | 0        | 12069.68 | 29564.39 | 867016   | 128278.9 | 480410.7 |
| 36997029 | 76520598 | 70762651 | 41081616 | 6.63E+08 | 1E+09    | 2.26E+09 | 6428949  | 1.74E+08 | 801726.6 |
| 516354.6 | 395761.6 | 14812.21 | 27369.67 | 20107.04 | 37826.98 | 641144.8 | 1036195  | 138881.9 | 276477.4 |

|          |          |          |          |          |          |          |          |          |          |
|----------|----------|----------|----------|----------|----------|----------|----------|----------|----------|
| 221270.4 | 178150.6 | 52685.04 | 58166.16 | 61040.69 | 53723.63 | 124826   | 107886.9 | 44117.84 | 130172   |
| 893924.2 | 351520   | 622138   | 2042417  | 2342050  | 1782315  | 911090   | 582762.8 | 1118665  | 1389071  |
| 352363.3 | 260968.7 | 4881153  | 2904117  | 7741362  | 72419.23 | 69114.34 | 789473.5 | 150528.7 | 394949.9 |
| 863870.2 | 183261.5 | 544740.5 | 743229.8 | 708360.1 | 870683.4 | 602026.9 | 962815.7 | 639858.3 | 781140.5 |
| 12517810 | 14618702 | 41774.19 | 51640.63 | 7103.57  | 537602.5 | 51598.37 | 47401.55 | 32120605 | 23821345 |
| 1242344  | 1471525  | 6316047  | 2604135  | 4134935  | 643579   | 2383718  | 3529396  | 0        | 1883537  |
| 554538   | 655039.2 | 0        | 0        | 0        | 0        | 0        | 1169031  | 1350179  | 0        |
| 579542.4 | 443804.5 | 0        | 0        | 0        | 22673.06 | 761753.3 | 1273333  | 78477.33 | 547589.1 |
| 12774.1  | 14995.34 | 44180.59 | 14013.12 | 102771.3 | 239659.3 | 44708.72 | 0        | 11120.89 | 5136.593 |
| 1114677  | 1245628  | 34811.87 | 53020.35 | 76270.75 | 64910.43 | 75790.77 | 307708.3 | 3187983  | 1340643  |
| 58538.82 | 69037.71 | 53400.27 | 46732.91 | 242438.3 | 480402.2 | 230771.8 | 118174.3 | 5226.504 | 0        |
| 1334052  | 780113.8 | 0        | 0        | 10638.3  | 344667   | 1969322  | 1974336  | 148012.2 | 1026623  |
| 666418.9 | 459042.8 | 118272.2 | 124675.9 | 45508.32 | 498288.9 | 534297.9 | 556602.1 | 82949.03 | 452855.7 |
| 217105.5 | 213376.1 | 5996.761 | 4983.862 | 4414.486 | 38241.1  | 127388.4 | 349850.8 | 0        | 38037.34 |
| 1510170  | 946448.3 | 10101.28 | 6817.862 | 7970.973 | 663784.7 | 2023358  | 2705175  | 250013.6 | 1149502  |
| 59118925 | 61930807 | 1747520  | 0        | 2490530  | 1773880  | 27755248 | 1.54E+08 | 0        | 73558127 |
| 350624.7 | 177018.1 | 8742.479 | 3556.892 | 0        | 0        | 568202.7 | 385559.9 | 47429.1  | 388839   |
| 175399.8 | 144937   | 0        | 2949.22  | 3588.425 | 51568.68 | 180631.1 | 154767.8 | 6411.098 | 198636.5 |
| 228395.4 | 132338.8 | 51459.88 | 12200.71 | 196767.4 | 25066.35 | 226798.4 | 242054.7 | 111925.4 | 437787.9 |
| 20136547 | 3843405  | 13263040 | 16608851 | 14514989 | 21725209 | 15637612 | 20427622 | 15201471 | 20063611 |
| 653923.5 | 761804.1 | 18190.98 | 7114.355 | 8108.782 | 15589.18 | 6726.169 | 0        | 1713130  | 1185334  |
| 2135657  | 855148.4 | 3448238  | 2421284  | 11450062 | 52670703 | 63622874 | 2489732  | 1865946  | 1029314  |
| 768498.9 | 911805.6 | 0        | 0        | 0        | 0        | 0        | 1515182  | 1961949  | 0        |
| 58051.87 | 13871.91 | 168266.7 | 99702.7  | 363333   | 1075802  | 248312.9 | 72275.26 | 37374.07 | 65413.79 |
| 61418.59 | 96280.69 | 22809.39 | 134655.2 | 121290   | 452862   | 402815.2 | 12787.26 | 23158.72 | 7876.86  |
| 969646.3 | 595908.3 | 8364.973 | 2988.073 | 5285.001 | 405017.2 | 1328991  | 1443179  | 496765.5 | 1212487  |
| 66898158 | 79407141 | 3393.001 | 2666.858 | 5033.544 | 8574.022 | 23400.92 | 37612.86 | 1.82E+08 | 1.16E+08 |
| 11948881 | 1490687  | 6510981  | 10333337 | 9096987  | 12805994 | 10542287 | 12641120 | 10066472 | 10724189 |
| 438163.1 | 307095.4 | 0        | 0        | 5832.081 | 37739.29 | 614101.4 | 898238.6 | 58134.31 | 366260.2 |
| 764166.4 | 893240.5 | 12757.09 | 13289.23 | 8003.161 | 27542    | 0        | 13433.74 | 1555041  | 1892456  |
| 349930.9 | 249986.8 | 5826.421 | 3129.867 | 3852.79  | 42320.64 | 475553.7 | 409705.8 | 23837.26 | 170966.4 |
| 1040150  | 940396.2 | 50945.73 | 30810.44 | 97321    | 556314.5 | 492498.7 | 1120340  | 299835.8 | 870000.6 |
| 8559905  | 2388304  | 3944025  | 4805959  | 5408081  | 9526452  | 6976157  | 7810799  | 6214037  | 6988317  |
| 527981.7 | 684063.5 | 6882685  | 4092561  | 11064952 | 124385   | 120967.9 | 1694398  | 40987.11 | 573674.8 |
| 1367697  | 768883.2 | 3293.726 | 0        | 10965.46 | 34765.43 | 2163369  | 2312374  | 235654.3 | 1323148  |
| 187233.4 | 129829.9 | 57806.36 | 17922.69 | 116654.6 | 82881.81 | 111449.2 | 183065.7 | 18074.05 | 106839.1 |
| 65710664 | 69098918 | 1253230  | 187085.4 | 2609097  | 1777480  | 32021746 | 1.73E+08 | 0        | 81464819 |
| 388286.7 | 327080.1 | 6265.892 | 6751.081 | 93951.44 | 109183.5 | 327638.2 | 702419.4 | 15293.83 | 85178.61 |
| 1333235  | 1414816  | 64467.64 | 99230    | 96889.93 | 347254.5 | 115763   | 910512   | 3736607  | 99885.19 |
| 38087.12 | 26487.93 | 147660.9 | 51959.3  | 236026.5 | 864644.5 | 236888.5 | 51900.05 | 12145.75 | 8329.742 |
| 684684.5 | 427949.3 | 2555.244 | 0        | 4267.373 | 253683.7 | 949681.9 | 952634.1 | 70124    | 418694.4 |
| 1560677  | 1147143  | 158169.5 | 72530.81 | 919756.5 | 242239.6 | 1415253  | 1700757  | 306479.5 | 460904.1 |
| 5056019  | 10156461 | 39478.28 | 9168724  | 48933272 | 2.4E+08  | 1.85E+08 | 657234.6 | 23218812 | 124162.1 |
| 231270   | 273401.9 | 0        | 0        | 0        | 0        | 9275.897 | 69964.93 | 0        | 28779.55 |
| 270403.6 | 144246   | 5807.159 | 7736.345 | 3169.974 | 174227.9 | 361668.3 | 380260.7 | 69911.97 | 379095.5 |
| 139203.4 | 37098.06 | 64084.2  | 56660.16 | 43895.58 | 82390.64 | 187425.4 | 183668.7 | 135152.8 | 169763.8 |
| 1674410  | 1126060  | 16957.2  | 6009.111 | 264013.3 | 1332550  | 1601675  | 2317545  | 1027956  | 2025820  |

|          |          |          |          |          |          |          |          |          |          |
|----------|----------|----------|----------|----------|----------|----------|----------|----------|----------|
| 172690.8 | 121904.8 | 272284.8 | 302703.8 | 268673.7 | 416314.5 | 170454.2 | 47287.83 | 167224.8 | 59961.92 |
| 5206358  | 6211454  | 0        | 0        | 0        | 0        | 0        | 11678246 | 12200013 | 0        |
| 2263940  | 2661552  | 20258.64 | 5674.255 | 33812.65 | 29739.26 | 78303.58 | 14860.38 | 6614032  | 2869168  |
| 6870004  | 3122367  | 107785.2 | 131273.5 | 120652.9 | 1018673  | 11122059 | 7953438  | 2054095  | 5541540  |
| 5379536  | 4124090  | 25168.88 | 98387.43 | 725162.7 | 1541535  | 6079973  | 12278234 | 4910668  | 4786220  |
| 268866.4 | 256226.3 | 710725.5 | 833380.8 | 615223.7 | 690642.9 | 22808.8  | 44581.76 | 355151.7 | 657256.8 |
| 929546.1 | 781540.2 | 291153.2 | 361397.5 | 291601.8 | 356311.6 | 75207.7  | 1045222  | 141391   | 137819   |
| 79339.24 | 79205.73 | 512564.1 | 145523.6 | 598884   | 1632678  | 97823.3  | 191378.4 | 21430.52 | 13194.93 |
| 735347.5 | 484328.5 | 144311.5 | 52550.89 | 60496.24 | 740356.6 | 500982.8 | 1492953  | 406506.6 | 243257.2 |
| 1643741  | 1960682  | 0        | 0        | 0        | 9441.382 | 7610.998 | 0        | 4174076  | 3326923  |
| 2978716  | 3162359  | 278149.1 | 317177.1 | 279911.5 | 392892.9 | 402512.5 | 1007476  | 7984170  | 814972.1 |
| 838177.7 | 246513.5 | 13987.72 | 6076.391 | 14718.08 | 20772.17 | 1435602  | 1127572  | 495673.4 | 694098.6 |
| 64843.44 | 17837.06 | 178788.5 | 91238.36 | 397562.4 | 75940.06 | 128268.6 | 83797.75 | 38709.34 | 70157.36 |
| 396861.4 | 419574.4 | 0        | 0        | 4594.339 | 10488.63 | 213360.9 | 1021429  | 78366.89 | 102813.3 |
| 215432   | 254214.2 | 0        | 0        | 3412.998 | 4383.291 | 8457.867 | 0        | 105486.4 | 573486.3 |
| 221549.9 | 225014.4 | 0        | 0        | 2870.069 | 68512.99 | 95802.57 | 438175.5 | 4779.272 | 11426.74 |
| 422238.1 | 78164.51 | 1043669  | 558775.8 | 1863191  | 5487703  | 1378806  | 314609.3 | 396975.8 | 505834.3 |
| 2547502  | 1532392  | 78795.87 | 65121.89 | 111637.6 | 646958.8 | 3693194  | 3565803  | 294668.2 | 1639840  |
| 676948   | 380788.6 | 2341.638 | 0        | 0        | 0        | 1083036  | 1044306  | 117496.1 | 593435.7 |
| 13621571 | 8876154  | 2115552  | 915877.6 | 3347808  | 4471673  | 16424962 | 24738585 | 3016957  | 6510593  |
| 323747.5 | 214103.4 | 0        | 0        | 0        | 34779.37 | 474488.2 | 432645.7 | 48888.04 | 243103.2 |
| 285119.3 | 332626.4 | 2186.58  | 7041.627 | 2204.011 | 0        | 27853.02 | 619784.7 | 0        | 52251.34 |
| 420554.7 | 224965.6 | 59292.93 | 54967.45 | 51284.97 | 105037.1 | 606580.8 | 668372.1 | 76947.28 | 340475.3 |
| 130738.5 | 126659.8 | 234450.2 | 132124.3 | 367324.2 | 1435629  | 682045.5 | 127727   | 25450.98 | 45429.23 |
| 1387077  | 1622149  | 2772.284 | 0        | 23597.43 | 0        | 153836.5 | 3502103  | 27876.68 | 310933.2 |
| 3013401  | 433492.6 | 2163665  | 2856502  | 3029371  | 1780382  | 2717723  | 3477874  | 2604172  | 2502061  |
| 583091.9 | 68264.08 | 659482.5 | 860706.8 | 942311.9 | 960387.4 | 431586.8 | 555616.5 | 573846.7 | 586413   |
| 182220.5 | 110553   | 289832.4 | 192536.2 | 1035092  | 4651441  | 6045379  | 230435.1 | 83733.23 | 51019    |
| 40584523 | 23071229 | 4879663  | 4062769  | 8176425  | 30900216 | 45026419 | 43326891 | 10635446 | 39510593 |
| 216475.2 | 165991.3 | 64121.69 | 92086.31 | 88371.9  | 97385.98 | 49975.19 | 290131.2 | 17997.82 | 57841.85 |
| 594708.9 | 402771.9 | 109590.9 | 58486.38 | 225672.5 | 134887.6 | 660117.9 | 809856   | 13361.88 | 1031852  |
| 47286258 | 24460381 | 6362317  | 4866841  | 10044044 | 37814980 | 54667219 | 56367979 | 13496018 | 44924654 |
| 2140594  | 432244.7 | 1276996  | 1726939  | 1549894  | 2290725  | 1744574  | 2350750  | 1702319  | 1712971  |
| 117198.8 | 82483.99 | 35634.7  | 12607.45 | 89453.02 | 87189.08 | 7169.484 | 205050.5 | 23117.54 | 42908.85 |
| 50299865 | 9861219  | 27698533 | 36109876 | 37139900 | 57061305 | 39401098 | 51052035 | 41012560 | 45688766 |
| 1530096  | 280077.6 | 970978.3 | 1258508  | 1108002  | 1619468  | 1315842  | 1857127  | 1082201  | 1599694  |
| 989.5178 | 2212.629 | 0        | 225357.3 | 1663783  | 152827   | 800989.8 | 0        | 0        | 4947.589 |
| 2605660  | 1784314  | 413321.3 | 189514.8 | 602484.8 | 781372.7 | 3033198  | 4891496  | 557512.1 | 1092092  |
| 500943.2 | 587382.2 | 20221.53 | 20388.97 | 7670.289 | 17454.84 | 0        | 10151.57 | 1279526  | 977558.7 |
| 112150.1 | 132815.1 | 0        | 0        | 0        | 4606.891 | 4713.741 | 335971.4 | 4523.169 | 34923.59 |
| 207990.4 | 137865   | 5644.571 | 3218.662 | 0        | 14993.53 | 305356.8 | 339677.4 | 22812.29 | 149466.3 |
| 133157   | 103533.3 | 0        | 4287.629 | 0        | 103629.1 | 106905.5 | 142477   | 0        | 79524.67 |
| 1490399  | 1365603  | 207629.3 | 52902.76 | 514785.9 | 57586.22 | 924437.8 | 3817269  | 458093.2 | 673623.5 |
| 541196.3 | 225886.5 | 161289.5 | 292039.7 | 182734.6 | 547825.2 | 465990.4 | 410247.8 | 369964.2 | 372589.9 |
| 2702462  | 1951858  | 71422.73 | 67721.81 | 140541.8 | 1420860  | 3014742  | 4163143  | 1505874  | 2893750  |
| 215918.5 | 223026.1 | 28118.33 | 27164.95 | 38607.79 | 23329.08 | 37307.74 | 486071   | 4983.781 | 119045.1 |
| 951429   | 880803.6 | 199078.1 | 246924.5 | 184039.1 | 413587.8 | 60830.69 | 2071136  | 101719.7 | 309761.9 |

|          |          |          |          |          |          |          |          |          |          |
|----------|----------|----------|----------|----------|----------|----------|----------|----------|----------|
| 11223202 | 13498485 | 31992.17 | 17797.46 | 38824.44 | 44366.31 | 53365.33 | 37618.31 | 29672110 | 21388509 |
| 158598.3 | 101444.6 | 3664.483 | 7718.492 | 64226.43 | 42379.9  | 197265.4 | 276614.7 | 33093.22 | 106751.9 |
| 12038509 | 14477329 | 43201.35 | 81571.77 | 40522.4  | 35188.22 | 20456.2  | 6560.712 | 33510261 | 20064762 |
| 812194.8 | 468892   | 533471.4 | 1458627  | 1423195  | 3344128  | 1662627  | 841792.2 | 227076.2 | 462176.7 |
| 216800.6 | 91118.49 | 104569   | 80966.94 | 74792.49 | 121895.6 | 261515.9 | 213085.4 | 108696.4 | 280540.4 |
| 26201.67 | 22193.66 | 113353.3 | 108481.6 | 104836.4 | 1701342  | 1423739  | 7729.998 | 5017.942 | 18576.27 |
| 679017.3 | 606031.1 | 97549.96 | 124850.6 | 164532.6 | 270276.1 | 229209.5 | 375303.5 | 210974.4 | 401633   |
| 483418   | 212138.1 | 625212.5 | 825779.6 | 797286.9 | 706252.5 | 439906.7 | 287272.3 | 305439.7 | 417480.1 |
| 172296.1 | 85950.51 | 2916.203 | 19268.37 | 39005.47 | 242585.9 | 79728.49 | 228152.7 | 140390.6 | 130954.1 |
| 37510926 | 43123174 | 129570.1 | 149566   | 4086930  | 326425.8 | 4712833  | 69624689 | 96850352 | 5292820  |
| 131269.1 | 112671.3 | 186486.9 | 227536.5 | 135852.5 | 477144.3 | 268017.9 | 88551.66 | 56061.21 | 40559.52 |
| 1286212  | 923739.6 | 207820.4 | 307544.7 | 240270.9 | 1240372  | 506784.1 | 2833676  | 647028.7 | 511189.8 |
| 522659.5 | 506435.6 | 82647.35 | 130110.3 | 90447.73 | 141624.1 | 76931.29 | 459959.4 | 29325.28 | 106271.9 |
| 367620.3 | 229513.5 | 0        | 0        | 0        | 6986.99  | 570020.8 | 642524   | 12833.56 | 437540.8 |
| 286093.7 | 171805.6 | 423673.2 | 250447.5 | 347268.5 | 677273   | 738919.5 | 502261.1 | 135177.8 | 223281.2 |
| 1811543  | 772910.8 | 174309.9 | 106914.9 | 617701.9 | 2291070  | 1415032  | 1482261  | 1185452  | 1207323  |
| 128780.9 | 94322.24 | 0        | 0        | 0        | 22829.7  | 173919.9 | 200842.7 | 13919.34 | 67426.34 |
| 13341684 | 5315509  | 1592540  | 2281150  | 9884991  | 8732132  | 15427011 | 18676204 | 5697656  | 14058484 |
| 190244.1 | 211541.3 | 6280.502 | 12348.9  | 9370.823 | 16944.92 | 34163.64 | 20796.33 | 203417.5 | 539867.2 |
| 4781039  | 2834456  | 595144   | 237753.3 | 813775.2 | 5370345  | 3530985  | 8423327  | 1833532  | 3716021  |
| 2679992  | 1025805  | 2210094  | 807159.5 | 677309.7 | 3003596  | 1494018  | 2556716  | 1588948  | 2013088  |
| 886286.4 | 661743.5 | 3044.686 | 0        | 7145.511 | 363118.4 | 1060852  | 1726372  | 155429.2 | 562882.2 |
| 530116.7 | 618772.3 | 27259.26 | 22565.08 | 28073.74 | 21964.1  | 4410.518 | 0        | 1318361  | 1073726  |
| 29092.1  | 29313.78 | 0        | 162322   | 1336842  | 229751.9 | 620495.6 | 73350.37 | 0        | 5342.472 |
| 1144312  | 641074.4 | 470465.2 | 658354.7 | 484089.2 | 838204.7 | 624247.1 | 1991684  | 393912.4 | 623403.5 |
| 16736752 | 9733535  | 93849.8  | 31973    | 484429.8 | 6498353  | 24260046 | 24102338 | 2169053  | 11696573 |
| 3566168  | 2235694  | 87948.67 | 74273.46 | 49982.8  | 1631912  | 4821496  | 6485946  | 636485   | 2667754  |
| 22236035 | 27023310 | 5918.16  | 2483.219 | 7228.274 | 21384.14 | 0        | 10762    | 60631113 | 40467102 |
| 5263.872 | 7849.467 | 6428.256 | 11329.98 | 38288.86 | 142558.4 | 54139.84 | 8764.005 | 0        | 0        |
| 198833.7 | 116349.2 | 246663.9 | 281819.9 | 261790.4 | 519422   | 280301   | 332438.4 | 99549.36 | 59362.31 |
| 814063.2 | 781387.8 | 0        | 7446.437 | 29012.54 | 422471.1 | 382326   | 520768.8 | 174353.2 | 539763   |
| 1629624  | 1268188  | 277181.9 | 295604.4 | 1105329  | 402819.4 | 823078.6 | 3801551  | 1309615  | 1326866  |
| 3279207  | 3490803  | 0        | 0        | 0        | 275182.9 | 1743338  | 5442161  | 26418.36 | 8262602  |
| 1922879  | 712170.5 | 672896.8 | 1065376  | 1049993  | 1951603  | 1630731  | 1635008  | 1155719  | 1511097  |
| 105887.4 | 117624.2 | 0        | 1992.033 | 9773.155 | 16063.95 | 18972.22 | 230668.7 | 15337.77 | 28818.5  |
| 4490606  | 3182244  | 6551900  | 20250561 | 36514013 | 5890873  | 7635160  | 5202714  | 410500.7 | 5065338  |
| 2097105  | 989767.2 | 6433.78  | 0        | 6471.161 | 9211.964 | 3523225  | 3459156  | 683599.3 | 1937278  |
| 91934027 | 57125539 | 1438982  | 980745   | 4451769  | 27727998 | 1.32E+08 | 1.64E+08 | 99011645 | 92507498 |
| 695214.6 | 556203.9 | 10045.77 | 8489.125 | 22739.14 | 82376.76 | 863958.9 | 612104.7 | 3853.701 | 604856.2 |
| 232241.1 | 137059.3 | 160081   | 172458.4 | 156046.3 | 72004.31 | 19233.75 | 215094.3 | 72360.68 | 144982.1 |
| 781914.9 | 952588.7 | 0        | 0        | 3948.618 | 6556.52  | 0        | 0        | 2059765  | 1540675  |
| 743527.3 | 588352.4 | 5095766  | 2418639  | 6815537  | 379734.9 | 594721.9 | 1601431  | 0        | 937083   |
| 287980.6 | 268933.1 | 458817.1 | 412702.4 | 1112001  | 2624224  | 635287.1 | 379090.8 | 26947.67 | 82290.77 |
| 52986616 | 43483676 | 8607171  | 4167768  | 16976942 | 10595383 | 44176994 | 1.16E+08 | 1070972  | 33779303 |
| 94448.91 | 70407.9  | 96452.35 | 220873.9 | 388329.1 | 113608.3 | 165347.9 | 192841.4 | 0        | 86703.42 |
| 135288.9 | 148982.3 | 13586.03 | 21385.28 | 7591.892 | 18380.78 | 7360.531 | 0        | 365379.7 | 170732.2 |
| 196376.9 | 232107.8 | 3956.074 | 6899.534 | 0        | 11049.39 | 12565.79 | 245332.5 | 12131.14 | 37655.33 |

|          |          |          |          |          |          |          |          |          |          |
|----------|----------|----------|----------|----------|----------|----------|----------|----------|----------|
| 2886287  | 1936791  | 6054.099 | 0        | 10543.82 | 71738.24 | 4359703  | 5564066  | 237288.2 | 3092377  |
| 78729.08 | 110652.6 | 822548.6 | 835842.3 | 2608556  | 35775.89 | 234002.9 | 255681.7 | 0        | 2647.223 |
| 243093.4 | 249291.9 | 0        | 0        | 8597.878 | 73522.94 | 113621.1 | 328519.6 | 23939.52 | 107624.1 |
| 7011439  | 1417020  | 3665261  | 4936734  | 4829450  | 7572941  | 6457963  | 7359695  | 5441187  | 6345658  |
| 948661.4 | 528762.5 | 35795.67 | 22899.63 | 72556.34 | 136856.4 | 1471665  | 1577191  | 254465.6 | 891946.2 |
| 231590.6 | 192584.4 | 0        | 0        | 0        | 0        | 295485   | 478813.1 | 34006.08 | 213590.2 |
| 316663   | 191524.2 | 41907.91 | 11280.2  | 63328.5  | 113625.3 | 424039.4 | 245519.1 | 341244.4 | 79635.24 |
| 3288608  | 2701917  | 433351.1 | 475088.6 | 635972.4 | 1921454  | 1891345  | 1727059  | 1005192  | 1365978  |
| 673988.9 | 413336.7 | 4659.555 | 0        | 7681.751 | 208330   | 988026.1 | 1168004  | 102395   | 548474.1 |
| 135355.5 | 120512.5 | 49433.19 | 389543   | 291194.3 | 542007.1 | 219950.5 | 71518.85 | 11923.96 | 82497.23 |
| 1927466  | 2282621  | 34982.35 | 17735.05 | 11866.86 | 112356.8 | 156642.6 | 1137990  | 748501.8 | 1018098  |
| 1.75E+08 | 1.86E+08 | 2836781  | 209330.5 | 3676215  | 14498683 | 94232401 | 4.76E+08 | 10827053 | 1.82E+08 |
| 94523352 | 1.01E+08 | 1587484  | 265263.3 | 3833670  | 4443848  | 48587889 | 2.58E+08 | 0        | 98927216 |
| 455694   | 555547.3 | 0        | 0        | 0        | 0        | 14825.19 | 278861.4 | 5129.664 | 577172.5 |
| 252977   | 216881.1 | 895531.9 | 1144255  | 875958.1 | 229004   | 73505.98 | 146413.1 | 558278.4 | 401592.7 |
| 171851.5 | 131282.3 | 0        | 0        | 0        | 0        | 240114.1 | 356878.9 | 0        | 111267.1 |
| 27506013 | 33342391 | 455865   | 354806.1 | 169045.6 | 301874.6 | 489099.9 | 25725571 | 85311549 | 4898465  |
| 552087.7 | 300073.3 | 8725.077 | 16825.45 | 53282.78 | 55315.7  | 871165.7 | 749454   | 267679   | 278588.1 |
| 17986.97 | 26665.52 | 152577.8 | 26503.22 | 179923   | 549350.7 | 43100.19 | 64086.41 | 0        | 0        |
| 183081.2 | 142031.9 | 3179.646 | 0        | 7462.923 | 48636.93 | 224235.8 | 313434.2 | 93744.16 | 350310.1 |
| 835458.8 | 847320.9 | 27886.24 | 95617.93 | 121107   | 139772.6 | 342379   | 372502.4 | 2271517  | 940316.1 |
| 547653.9 | 606233   | 1371128  | 2185412  | 3709724  | 11296173 | 1303985  | 635561.1 | 79410.04 | 207204.7 |
| 1119570  | 1030539  | 426669   | 438697.8 | 363824.4 | 116570.6 | 54223.16 | 465588.6 | 2823834  | 1362631  |
| 47868620 | 52098392 | 1274398  | 178261.1 | 3235839  | 2663672  | 19876201 | 1.31E+08 | 0        | 60233207 |
| 3197559  | 2897480  | 213460.8 | 151793.3 | 489504.9 | 1686307  | 1608003  | 2056999  | 346596.3 | 1359933  |
| 443206.7 | 300079.4 | 124069.1 | 36813.32 | 113074.1 | 142790.3 | 497444   | 866228.2 | 112770.3 | 199680.6 |
| 30940.93 | 32154.7  | 142228.9 | 51905.46 | 89650.58 | 43836    | 30608.86 | 62552.42 | 5711.346 | 18310.91 |
| 5851545  | 7176136  | 15627.69 | 15090.46 | 11493.89 | 14651.31 | 29527.68 | 5843405  | 18206618 | 565550.7 |
| 82313.4  | 36889.56 | 118001.1 | 150499.2 | 69887.02 | 161988.7 | 349975.2 | 91626.67 | 113211.2 | 44711.25 |
| 334991.6 | 406460.7 | 3837.48  | 3314.806 | 0        | 16957.52 | 0        | 7797.346 | 867868.8 | 677887.7 |
| 11896.34 | 10746.78 | 147803.1 | 227290.2 | 334656.4 | 1122405  | 7484.603 | 10176.6  | 5122.133 | 16446.98 |
| 554024.9 | 431979.7 | 149970.6 | 214855.7 | 204879.9 | 300040.9 | 144672.5 | 299366.9 | 652871.7 | 1265570  |
| 61118.12 | 48998.37 | 27750.05 | 211487.3 | 186713.2 | 125276.8 | 84273.44 | 26983.71 | 80593.7  | 138386.3 |
| 384156.9 | 461437.6 | 0        | 8144.944 | 3687.403 | 35997.32 | 0        | 0        | 1024078  | 724214.8 |
| 705009.6 | 592730.2 | 17691.47 | 34225.31 | 259231.9 | 337753.8 | 448077.9 | 459266.9 | 378500.6 | 1749088  |
| 14446075 | 16164611 | 1182024  | 1869940  | 1834189  | 375042.6 | 1374689  | 39771935 | 38094.1  | 14102353 |
| 192522.6 | 215177.3 | 20884.03 | 21547.83 | 6892.085 | 27075.72 | 13203.57 | 328778.5 | 0        | 39465.86 |
| 28573615 | 34651825 | 576015.3 | 639282   | 470715.3 | 269413.2 | 341569.6 | 143233.2 | 73718531 | 57827842 |
| 282476.4 | 132988.7 | 22676.35 | 3116.49  | 71118.08 | 414072   | 123934.5 | 282744.1 | 61500.12 | 296842.7 |
| 3166706  | 3824555  | 62318.02 | 85580.45 | 143343.7 | 42376.24 | 6728.495 | 18460.37 | 8475008  | 5926871  |
| 88101.62 | 57424.12 | 64917.16 | 54648.74 | 40454.04 | 42311.92 | 0        | 84607.03 | 18216.39 | 46781.77 |
| 506064   | 362595.4 | 0        | 6850.726 | 0        | 21578.03 | 736029.8 | 971391   | 65119.32 | 467897.7 |
| 826661.4 | 570111.3 | 129327.7 | 67566.55 | 158256.7 | 244375.1 | 1004238  | 1244987  | 238018.1 | 498236.7 |
| 1092994  | 749003.9 | 0        | 4715.919 | 14917.7  | 9297.846 | 1646655  | 1944446  | 68243.85 | 617617.1 |
| 121844.4 | 44241.1  | 210043.3 | 90938.34 | 353261.1 | 551461   | 151583.1 | 75686.06 | 82703.21 | 181739.6 |
| 72528.11 | 76024.46 | 0        | 0        | 0        | 19750.72 | 34689.37 | 84402.94 | 5605.77  | 67098.48 |
| 700405.1 | 554236.5 | 11269.99 | 25194.48 | 23266.19 | 436840.9 | 655024.4 | 959086.6 | 375318   | 236592.6 |

|          |          |          |          |          |          |          |          |          |          |
|----------|----------|----------|----------|----------|----------|----------|----------|----------|----------|
| 626648.4 | 246250.9 | 167981   | 295870.1 | 314503.3 | 652734.5 | 552237.2 | 541211.4 | 307017.7 | 596594.8 |
| 414593.2 | 76098.01 | 225943.7 | 367534.3 | 307285   | 446999.7 | 322897.3 | 471505.1 | 311851   | 354196.2 |
| 235646.5 | 272749.7 | 0        | 0        | 4331.326 | 70759.26 | 0        | 179548.8 | 11289.84 | 57408.12 |
| 151034.5 | 140702.4 | 269195.7 | 225728.4 | 729391.1 | 1658118  | 320030.8 | 152876.6 | 31392.68 | 78338.94 |
| 1.75E+08 | 2.16E+08 | 277697.3 | 306625.5 | 298350.2 | 198717.5 | 79868.01 | 37606.58 | 5.09E+08 | 2.71E+08 |
| 3639556  | 1838795  | 751641.9 | 616147.3 | 1306488  | 705413.4 | 5152134  | 5252611  | 1295042  | 2099159  |
| 217506.4 | 187738.2 | 6360.406 | 11727.65 | 16760.17 | 175809.5 | 103825.6 | 263382   | 17932.15 | 53428.99 |
| 173919.6 | 149103.1 | 164878.1 | 563593.4 | 292089.4 | 370702.9 | 245726.8 | 310243.6 | 23496.18 | 48817.92 |
| 42210.08 | 59633.57 | 60349.04 | 32084.68 | 277193.2 | 218691.9 | 80482.31 | 148681.4 | 17479.63 | 15873.49 |
| 46849.03 | 22044.94 | 64008.36 | 583486.6 | 169800.1 | 270785.4 | 37298.9  | 43391.48 | 70320.81 | 68920.52 |
| 471278.5 | 475566.7 | 61650.87 | 17538.32 | 38603.19 | 112602.5 | 204933.3 | 1294454  | 105185   | 219294.1 |
| 757814.2 | 327452.4 | 268205.5 | 307931   | 254362   | 890061.2 | 531940.6 | 1171878  | 453234.5 | 453544.2 |
| 131920.6 | 51171.81 | 175383.7 | 471115.2 | 1144303  | 202867.1 | 287144.9 | 171410.4 | 62844.4  | 102279.9 |
| 290064   | 136179.4 | 1338364  | 631312   | 925280.1 | 4429421  | 632306.8 | 354354.9 | 231543.7 | 223145.4 |
| 213056.7 | 106965.3 | 0        | 4756.911 | 0        | 0        | 357698.1 | 193932.1 | 41592.06 | 246596.4 |
| 574631   | 889108.4 | 2328400  | 2646099  | 883567.6 | 745327.8 | 866318.4 | 2144897  | 16419.36 | 395534.4 |
| 166863.7 | 115811.7 | 0        | 0        | 0        | 0        | 252146.6 | 313549.6 | 4571.905 | 166069.9 |
| 1.02E+08 | 1.1E+08  | 1335009  | 322583.9 | 3862480  | 5364081  | 56715246 | 2.77E+08 | 0        | 1.09E+08 |
| 199770.5 | 85009.32 | 125357.3 | 131886.1 | 109764.2 | 63243.36 | 203755.5 | 202510.7 | 110857.6 | 258880.6 |
| 259324.5 | 299241.6 | 683002.9 | 1129873  | 1926911  | 5840473  | 563178.5 | 185876.2 | 136872.9 | 71625.8  |
| 3507914  | 4280454  | 30251.57 | 13050.07 | 155863.6 | 12649.27 | 107165.7 | 9951745  | 130148.6 | 1329639  |
| 16059612 | 16724951 | 1064682  | 674635   | 2028253  | 1628503  | 7518002  | 6405191  | 43045839 | 21734340 |
| 3547825  | 3319322  | 116162.6 | 38602.72 | 138121.7 | 952713.9 | 2934688  | 8196077  | 0        | 2936394  |
| 761622.7 | 487840.1 | 165561.5 | 188307.7 | 139901.6 | 848640.9 | 366201.1 | 1565740  | 396735.9 | 347175.7 |
| 12547624 | 12617736 | 595719.6 | 273520.9 | 4242298  | 6381444  | 379645.6 | 31740166 | 329431.5 | 10298649 |
| 165990   | 181040.2 | 5700.811 | 0        | 0        | 28466.55 | 67407.29 | 198818.6 | 6254.816 | 76732.6  |
| 660251   | 558780.2 | 10061.14 | 3276.92  | 11018.03 | 87288.28 | 785490.3 | 1627834  | 186692.7 | 450323.2 |
| 47446810 | 51460940 | 649670.1 | 68099.59 | 992599.8 | 2886145  | 25383089 | 1.3E+08  | 0        | 51630119 |
| 237450.5 | 291051.5 | 0        | 0        | 3868.05  | 6351.519 | 8303.426 | 8009.672 | 409043.7 | 667790.3 |
| 19112.66 | 16635.89 | 68488.98 | 45754.76 | 158195.6 | 481166.3 | 72047.84 | 7279.417 | 5881.795 | 16662.52 |
| 98284.29 | 107521.9 | 0        | 0        | 0        | 0        | 57928.75 | 276509   | 4919.277 | 23623.08 |
| 168839.9 | 82270.83 | 193158   | 277516.2 | 238457.9 | 248049   | 222872.1 | 140393.7 | 148131.6 | 60682.26 |
| 239621.4 | 257415.7 | 3786.63  | 0        | 0        | 9445.204 | 146808.4 | 641898.6 | 0        | 208726.3 |
| 195741   | 43192.41 | 45418.12 | 247784.2 | 39148.8  | 190002.3 | 59833.83 | 229550.3 | 189783.2 | 154984.5 |
| 9464050  | 10067340 | 161848.5 | 0        | 714928.7 | 246700.5 | 5624522  | 25557968 | 0        | 8587596  |
| 18583631 | 5347093  | 8472732  | 13568437 | 11517212 | 18819321 | 16304423 | 15958997 | 13144772 | 15757703 |
| 5178467  | 5792358  | 63441.34 | 98117.75 | 0        | 311523.1 | 2150511  | 14342300 | 0        | 6120127  |
| 3542634  | 4400301  | 11079.92 | 19012.05 | 0        | 29495.43 | 0        | 31409.36 | 9835424  | 6474355  |
| 978523.1 | 954715.3 | 13639.48 | 0        | 11418.92 | 212648   | 774931.7 | 2549196  | 0        | 559203   |
| 4514397  | 5608351  | 9546.302 | 10226.15 | 3733.467 | 23188.74 | 26339.03 | 6176.177 | 12202250 | 8749387  |
| 280716.2 | 126071.7 | 220608.2 | 650211.7 | 932848.6 | 541552.3 | 263212.6 | 180189.8 | 313566.4 | 459961.3 |
| 4501.964 | 6631.988 | 53718.15 | 64293.93 | 244737   | 574439.5 | 15871.03 | 7796.193 | 0        | 0        |
| 197059   | 155610.2 | 14726.11 | 12695.79 | 200657.1 | 28075.1  | 78916.23 | 124359.2 | 465220.5 | 157269.4 |
| 72241.36 | 11974.29 | 266566.8 | 397458.5 | 229306.6 | 54072.52 | 29848.47 | 82754.61 | 80005.37 | 70879.18 |
| 214217.7 | 213773.5 | 22747.94 | 0        | 25385.28 | 22321.26 | 139263.1 | 548404.6 | 21162.57 | 47905.79 |
| 139510.6 | 41061.55 | 0        | 2375.174 | 42217.06 | 37812.82 | 227112.6 | 132214   | 133301.8 | 87780.64 |
| 134995.7 | 75775.15 | 135849.9 | 175658.5 | 152630.8 | 586077.2 | 622784   | 107580.4 | 66567.3  | 235610.7 |



|          |          |          |          |          |          |          |          |          |          |
|----------|----------|----------|----------|----------|----------|----------|----------|----------|----------|
| 560063.9 | 494685.3 | 17124.78 | 4705.7   | 110902.8 | 259442.4 | 402951   | 471797.8 | 238546.1 | 1420431  |
| 826851.5 | 576710.9 | 11622.07 | 0        | 15588.55 | 579120.5 | 933935.3 | 1246801  | 439142.9 | 941793.1 |
| 14245768 | 17616742 | 156295.7 | 167759.2 | 185792.1 | 165835.4 | 90897.79 | 30815.16 | 40542577 | 24019887 |
| 237484.3 | 191702.8 | 3583.533 | 14215.54 | 64771.9  | 147320.3 | 175072.9 | 251528.7 | 4277.234 | 84844.97 |
| 371790.7 | 295636.8 | 0        | 0        | 0        | 0        | 512212.8 | 496468.6 | 11566.13 | 103821.3 |
| 432401.4 | 377992.8 | 4985.098 | 2300.041 | 5090.874 | 42300.59 | 502509   | 624747.2 | 113554.5 | 448776.9 |
| 65339.46 | 10239.82 | 3552.106 | 8526.336 | 15499.78 | 64254.99 | 85793.61 | 73579.77 | 65479.62 | 49833.91 |
| 73186.26 | 62634.12 | 105931.4 | 79121.73 | 244009.3 | 885002.3 | 362712.6 | 128573.2 | 26723.41 | 35814.82 |
| 90840.36 | 52296.56 | 100443.2 | 102316.4 | 103872.6 | 328265.8 | 358623.2 | 88058.79 | 60336.94 | 32118.48 |
| 471200.2 | 288678   | 2914862  | 3371245  | 1989011  | 62104.03 | 154338.6 | 401639.2 | 73830.67 | 371479.1 |
| 1598577  | 1096885  | 167904.1 | 225735.3 | 217363.6 | 1391463  | 1343508  | 2014156  | 79350.84 | 840133.6 |
| 212723.3 | 120345.8 | 108833.1 | 101518   | 95117.6  | 157192.7 | 120425   | 202382.1 | 375487   | 273558.1 |
| 670834.9 | 697464.2 | 16115.13 | 2247.54  | 21359.98 | 102818.7 | 421276.9 | 1850104  | 7070.75  | 569646.4 |
| 47628816 | 59781531 | 153555   | 110751.6 | 116322.4 | 8659.953 | 33126.25 | 10076.8  | 1.4E+08  | 75296585 |
| 337484.1 | 231873.1 | 3143.862 | 0        | 7238.811 | 4582.781 | 514144.3 | 568442.7 | 10171.11 | 185522.8 |
| 49624552 | 51514477 | 935783.5 | 156850.9 | 1881336  | 3784016  | 35002362 | 1.33E+08 | 42808.92 | 44003799 |
| 148095.2 | 154533.6 | 393625.5 | 707239.6 | 1151007  | 3482067  | 261828.7 | 147400.1 | 52671.93 | 75174.42 |
| 929989   | 163972.8 | 639132.7 | 778484.1 | 844853   | 944172   | 718507.6 | 980801.5 | 766833.4 | 769727.3 |
| 6726682  | 8398370  | 68537.34 | 93308.3  | 77841.92 | 15928.55 | 34653.31 | 115774.1 | 17865873 | 13622067 |
| 892740.6 | 549883.4 | 445417.4 | 550734.8 | 498251.4 | 465891.5 | 317450.5 | 886720.8 | 379124.3 | 312033.2 |
| 875812.9 | 441650.8 | 306862.1 | 284321.7 | 296947.9 | 941092.2 | 638392.9 | 1370479  | 428811.4 | 446053.7 |
| 1871560  | 883852.1 | 566162   | 789889.7 | 806011.4 | 1849483  | 1559085  | 1896883  | 800768.8 | 1315495  |
| 288956.4 | 298685.1 | 0        | 0        | 0        | 0        | 242052.1 | 182275.5 | 31670.39 | 484215   |
| 192965.5 | 173517.5 | 4046.82  | 3330.251 | 9742.086 | 0        | 220822.9 | 230622   | 0        | 167601.5 |
| 278003   | 160495.8 | 67713.2  | 62986.98 | 36971.79 | 107819.7 | 366561.5 | 465176.3 | 65737.24 | 163616.9 |
| 9705857  | 7038516  | 514944.6 | 778331.4 | 4984124  | 1655521  | 10687654 | 11360823 | 12919983 | 3858778  |
| 21296565 | 3659313  | 14499359 | 19647809 | 20313582 | 13237426 | 20727423 | 26148574 | 17586934 | 17790399 |
| 588164.7 | 458350   | 22988.05 | 25333.98 | 154671.7 | 32303.2  | 724256.7 | 348711.2 | 169651.7 | 257207.3 |
| 104119   | 30953.14 | 0        | 28180.23 | 5269.884 | 0        | 177479.4 | 100377.4 | 143979   | 60366.65 |
| 9943791  | 12163161 | 267986   | 313338   | 203392.5 | 500891.2 | 259274.8 | 443726   | 27536795 | 17819667 |
| 382873.1 | 218895.7 | 50822.27 | 33197.49 | 110025.9 | 57093.32 | 556019.2 | 418085.4 | 0        | 539594.7 |
| 2162894  | 2649007  | 75048.54 | 93375.52 | 31925.45 | 42141.68 | 86739.14 | 188217.9 | 6301915  | 3333017  |
| 172505.9 | 62767.73 | 303463   | 170097.1 | 708719.4 | 1663531  | 396511   | 254538   | 84176.06 | 201764.6 |
| 664666.4 | 412734.4 | 6707.857 | 6858.382 | 0        | 227250.9 | 984161   | 1060964  | 74631.99 | 414851.5 |
| 480878.6 | 323712.8 | 211523.9 | 312094.2 | 246969.7 | 266178.5 | 78916.26 | 600905.5 | 177466.3 | 176518.3 |
| 7229233  | 9126081  | 9657.926 | 9376.799 | 2837.464 | 18663.27 | 17524.37 | 24398.09 | 20517178 | 12948268 |
| 1461490  | 859928.7 | 2949.197 | 3288.316 | 5246.095 | 226828   | 2329125  | 2203583  | 243738.9 | 895678.4 |
| 1889264  | 1537474  | 28892.74 | 7732.709 | 75154.01 | 793504.1 | 2078692  | 3546303  | 717515.2 | 1703023  |
| 158325.6 | 164956.6 | 29604.06 | 35314.75 | 28060.5  | 26519.93 | 20072.56 | 410155.5 | 4360.326 | 35836.41 |
| 355316   | 390064.9 | 86002.19 | 79335.51 | 29562.98 | 26800.17 | 12819.44 | 32705.71 | 662245.3 | 882187.6 |
| 11747363 | 14533208 | 356356.4 | 376265.8 | 344863.7 | 185763.6 | 53968.11 | 44707.11 | 32409869 | 21588888 |
| 20029022 | 21499988 | 362792.6 | 30713.94 | 1602671  | 1703404  | 11223732 | 55308161 | 0        | 21500904 |
| 49513599 | 54089405 | 696752.2 | 280261.4 | 2384022  | 9011204  | 21281073 | 1.37E+08 | 0        | 40238895 |
| 40121.57 | 59247.56 | 111043   | 88194.87 | 333525.9 | 801556.1 | 83921.25 | 44310.21 | 6818.736 | 0        |
| 285699   | 254098.6 | 442418.2 | 981692.2 | 749730.9 | 2316229  | 215780.3 | 348297.2 | 92277.33 | 105358.3 |
| 349672.9 | 220388.3 | 8946.752 | 0        | 16925.46 | 9892.703 | 551575.2 | 579445.7 | 33958.54 | 216686.3 |
| 375006   | 247545.9 | 66454.74 | 93111.18 | 111328.7 | 376038.6 | 208139.5 | 361586.5 | 224204.8 | 177170.3 |

|          |          |          |          |          |          |          |          |          |          |
|----------|----------|----------|----------|----------|----------|----------|----------|----------|----------|
| 4393283  | 5566156  | 0        | 0        | 0        | 0        | 0        | 10789483 | 10171299 | 330874.3 |
| 130187.4 | 143481.5 | 5400.352 | 20150.61 | 18250.82 | 22377.32 | 18681.89 | 71100.34 | 13982.33 | 0        |
| 924757.6 | 930033.1 | 239502.7 | 312229.4 | 158028.7 | 243351.1 | 0        | 17318.53 | 1140669  | 2323404  |
| 61396049 | 53608019 | 1780350  | 331060.3 | 8735061  | 8827854  | 66320069 | 99557336 | 2634272  | 9290889  |
| 28348670 | 31482240 | 9897982  | 6172563  | 193691.2 | 435810   | 809416   | 56238969 | 17974718 | 258437   |
| 401890.2 | 174698.6 | 79851.49 | 112294.7 | 213731.3 | 540195.8 | 164255.9 | 633705.6 | 195111.4 | 266503.2 |
| 1199731  | 845823.4 | 107527.2 | 104979.2 | 151585   | 338461.7 | 1551804  | 2501083  | 451835.8 | 1532417  |
| 7642.59  | 7608.564 | 64834.66 | 185751.2 | 285953.1 | 911727.1 | 14772.89 | 0        | 15129.26 | 7781.255 |
| 4931342  | 3112373  | 185884.5 | 397176.1 | 272620.4 | 652471.3 | 7460618  | 7317577  | 466904.7 | 2978131  |
| 64069.46 | 39724.09 | 131331.2 | 124883.7 | 28233.35 | 272675.9 | 118858.8 | 49697.45 | 41567.87 | 70536.58 |
| 20229926 | 25340273 | 75114.96 | 133898.3 | 212362   | 227118.7 | 780316.9 | 527837.8 | 55657818 | 38532634 |
| 58832.7  | 53624.49 | 87749.95 | 312110   | 525494.9 | 1477730  | 131856.8 | 90003.57 | 24614.54 | 6099.944 |
| 2999184  | 3815897  | 0        | 0        | 0        | 0        | 0        | 5477077  | 8495545  | 0        |
| 105418.9 | 109109.5 | 0        | 12028.78 | 0        | 13587.04 | 70475.81 | 263557.3 | 4036.518 | 25723.6  |
| 1170431  | 876586.9 | 473381.5 | 398392.2 | 223654   | 783491.6 | 519690.8 | 2598066  | 687789.3 | 302924.5 |
| 2077070  | 1552947  | 2301971  | 4695591  | 11958013 | 1136971  | 7695072  | 4473823  | 183508.1 | 2263263  |
| 2007107  | 580297.9 | 45546.04 | 82543.59 | 192896.8 | 2716775  | 1938195  | 2231658  | 1873506  | 1836958  |
| 11079.4  | 13323.71 | 69802.69 | 355235.1 | 385992.1 | 0        | 0        | 0        | 12931.2  | 33394.62 |
| 104643.6 | 75374.26 | 2934.908 | 6805.084 | 14035.46 | 77845.05 | 103614.6 | 54412.07 | 79326.1  | 47147.18 |
| 90649.92 | 52001.61 | 0        | 0        | 0        | 0        | 151235.7 | 143440.5 | 5662.081 | 93604.33 |
| 1.52E+08 | 1.67E+08 | 2321308  | 427724.2 | 3125583  | 12827339 | 85168062 | 4.17E+08 | 0        | 1.68E+08 |
| 334067   | 242592.4 | 0        | 3209.643 | 0        | 15248.75 | 498392.4 | 697487.2 | 27885    | 294652.4 |
| 900354.4 | 1084186  | 2029491  | 1698653  | 6457525  | 1562371  | 1493888  | 1285137  | 0        | 2632356  |
| 536883.3 | 335118.7 | 7906.753 | 11793.24 | 393126.5 | 583344.2 | 208954.3 | 568350.2 | 92610.76 | 927663.1 |
| 274514.1 | 345293   | 3608.173 | 4664.359 | 3200.236 | 9559.801 | 0        | 8670.781 | 835275.6 | 362689.4 |
| 757128   | 821800.6 | 70074.99 | 100184.8 | 58195.49 | 182838.2 | 157127.3 | 153234.1 | 1770639  | 1532241  |
| 315969.2 | 321754.9 | 0        | 0        | 0        | 129406.3 | 182671.8 | 279310.8 | 0        | 27569.09 |
| 213775.1 | 264585.8 | 2727.105 | 7781.454 | 3054.504 | 7840.582 | 12404.81 | 7006.927 | 561792   | 435602   |
| 571596   | 724858.7 | 8921.945 | 7075.035 | 0        | 0        | 7763.022 | 260706.2 | 12070.61 | 513169.4 |
| 159217   | 98361.1  | 287460.3 | 60158.12 | 323272.7 | 859485.7 | 429728.2 | 152551.6 | 172075.9 | 40386.39 |
| 845895.7 | 508559.9 | 487306.5 | 521950   | 482937.2 | 633362.5 | 62779.39 | 1337990  | 86103.38 | 588527.3 |
| 2156202  | 2702068  | 4385.04  | 0        | 6586.393 | 59656.75 | 150965.3 | 1210591  | 978009.3 | 840473.1 |
| 255792.1 | 124763.5 | 330301.2 | 170669   | 793181.4 | 956059.3 | 359913.4 | 173913.7 | 197020.3 | 336269.8 |
| 90064.02 | 65490.64 | 3947.376 | 2430.903 | 0        | 49788.3  | 108507.1 | 197173   | 33574.63 | 85190.37 |
| 250582.4 | 247811.5 | 39320.54 | 122896.2 | 88974.03 | 16197.07 | 15163.02 | 419848.2 | 6198.349 | 169239.3 |
| 506282.7 | 489867.9 | 3012.564 | 0        | 4946.904 | 310001   | 278082.7 | 555726.4 | 0        | 76744.72 |
| 689652.8 | 494185.2 | 146982.1 | 186501.1 | 174345.9 | 453857.4 | 527105.8 | 497942.6 | 70456.57 | 558731   |
| 720968.9 | 702265.4 | 6772.099 | 6202.866 | 4733.87  | 10236.98 | 741862.3 | 1610753  | 161372.7 | 286908.7 |
| 3604871  | 4556230  | 39974.54 | 79851.08 | 50628.32 | 57042.74 | 21956.38 | 16610.78 | 10292354 | 6372395  |
| 1171183  | 577119.1 | 197366.1 | 235822.2 | 379984.4 | 662457.1 | 1558918  | 1780606  | 472159.5 | 647984.4 |
| 254115.3 | 150289.6 | 306457.7 | 413021.4 | 445365.9 | 282706.7 | 434731.1 | 495268   | 126219.6 | 241189.9 |
| 13119165 | 7803389  | 199239.2 | 68531.17 | 449217.5 | 5116941  | 19625956 | 21065166 | 2506520  | 10084344 |
| 480664.3 | 339182.9 | 3445.607 | 0        | 0        | 0        | 741250.1 | 1030259  | 98095.62 | 408452.7 |
| 10820291 | 848667.3 | 6081102  | 7807882  | 7715938  | 12572789 | 10005589 | 10510015 | 9541296  | 11377731 |
| 149370.2 | 93497.75 | 227266   | 232664.2 | 726141.6 | 212878.3 | 238888.9 | 270805   | 150606.6 | 108728   |
| 1189632  | 1467910  | 57021.15 | 77669.59 | 39902.45 | 27295.52 | 28640.21 | 242327.5 | 3673243  | 1385048  |
| 252443.8 | 219572.1 | 1025503  | 1779527  | 2397196  | 12997.71 | 105921.2 | 528883   | 402599.9 | 258701.3 |

|          |          |          |          |          |          |          |          |          |          |
|----------|----------|----------|----------|----------|----------|----------|----------|----------|----------|
| 8640674  | 10932163 | 0        | 0        | 0        | 657616.4 | 0        | 26153354 | 0        | 0        |
| 91525.66 | 33942.42 | 80177.17 | 132543.1 | 112845.2 | 187125   | 125542.4 | 92704.56 | 58959.29 | 63661.1  |
| 995866   | 115404.8 | 713024.7 | 954278   | 881995   | 1041105  | 773097.5 | 1097256  | 859974.9 | 893830.4 |
| 914793.3 | 756366.6 | 40633.34 | 39398.56 | 41710.33 | 1022986  | 311026.8 | 1563383  | 188865.2 | 662316.9 |
| 2828590  | 3372321  | 0        | 0        | 0        | 220828.2 | 799145   | 8672557  | 644023.3 | 1122669  |
| 211850.3 | 200587.5 | 2230.917 | 0        | 0        | 42223.08 | 210098   | 473293.3 | 22485.03 | 84654.19 |
| 578615.3 | 193764.4 | 367152.6 | 1217525  | 1264588  | 1141818  | 567639   | 359556.7 | 667039   | 855210.1 |
| 302710.4 | 201092   | 167165.7 | 207718.8 | 186302.4 | 104990.4 | 58121.68 | 347059.8 | 94807.32 | 147273.9 |
| 496541.3 | 267577.5 | 604644.1 | 362678   | 1090462  | 1327439  | 751014   | 615804.6 | 138164.4 | 354082.9 |
| 664725   | 676938.4 | 173939.2 | 155522.2 | 152550.6 | 51769.18 | 161094.1 | 45163.97 | 1751811  | 778568.9 |
| 219919.6 | 258064.3 | 18276.68 | 24420.26 | 27052.23 | 19054.45 | 9332.35  | 18505.26 | 573761.3 | 416812.4 |
| 3.22E+09 | 2.74E+09 | 5.36E+08 | 2.61E+08 | 1.08E+09 | 6.33E+08 | 2.81E+09 | 7.21E+09 | 57583999 | 1.97E+09 |
| 85536.32 | 48987.87 | 262763   | 1448877  | 573667   | 164355.6 | 118593.9 | 51177.51 | 99305.82 | 162366.6 |
| 24938912 | 14437944 | 38929.74 | 11002.28 | 442553.5 | 335481.4 | 41615695 | 42148727 | 5571238  | 25541843 |
| 23308.47 | 22593.2  | 0        | 106847.2 | 1355166  | 180406.5 | 638262   | 0        | 26442.71 | 0        |
| 44406    | 30274.77 | 84541.66 | 155109.9 | 69981.99 | 97391.36 | 19422.03 | 66651.56 | 85762.96 | 16236.71 |
| 4301330  | 5461270  | 41341.77 | 30330.55 | 71940.94 | 181501   | 48226.15 | 113237.9 | 7010220  | 12664269 |
| 5295829  | 5070356  | 575736.5 | 696009.6 | 804616.6 | 2136556  | 2603472  | 2093844  | 1186597  | 1622259  |
| 318359.9 | 112174.8 | 92309.97 | 11265.32 | 188158   | 286549   | 372379.2 | 413884.6 | 376785   | 149383.9 |
| 2282450  | 2371400  | 84792.4  | 71029.36 | 252961.5 | 331878.8 | 1455167  | 440715.4 | 5814733  | 3662650  |
| 99312.43 | 40410.02 | 548231.6 | 867533   | 178718.2 | 118246.6 | 90727.95 | 63310.41 | 114323.5 | 157172.7 |
| 899932.4 | 972945   | 48397.21 | 15172.9  | 94943.89 | 83852.27 | 486741.5 | 2222934  | 3980.819 | 223435.6 |
| 1301584  | 1668493  | 3241.029 | 0        | 0        | 16996.16 | 43957.66 | 0        | 3751538  | 2315716  |
| 138908.7 | 128915   | 3059.275 | 0        | 0        | 67342.22 | 114757.5 | 339149.2 | 8096.046 | 54996.16 |
| 1487644  | 1898598  | 29308.55 | 17461.79 | 11958.85 | 16496.65 | 31756.33 | 51975.83 | 4018202  | 3043630  |
| 2613981  | 3280183  | 13492.98 | 17694.21 | 9699.329 | 179661.5 | 184529.7 | 1539111  | 685100.2 | 1434177  |
| 363416.7 | 215263.8 | 0        | 0        | 8659.333 | 128830.9 | 558240.9 | 549198.1 | 38252.35 | 262477.7 |
| 20415339 | 7277631  | 6657695  | 10686509 | 11045573 | 23511109 | 16294217 | 17269942 | 14989591 | 15438192 |
| 384169.2 | 476287.8 | 0        | 5641.687 | 14921.78 | 42027.54 | 19901.99 | 37576.88 | 991473.1 | 810047.5 |
| 377622.4 | 353517.7 | 18836.31 | 33318.1  | 29297.14 | 187953.4 | 241506.1 | 256783.1 | 35685.19 | 206255.8 |
| 251640   | 209383.5 | 6059.592 | 14451.85 | 6622.937 | 178091.3 | 212064.6 | 556350.1 | 23471.96 | 102295.7 |
| 2007914  | 2457793  | 147838.6 | 165620.7 | 109462   | 54387.16 | 79798.82 | 53222.33 | 5248588  | 4061955  |
| 10251392 | 13278484 | 12327.86 | 3807.516 | 3112.879 | 16413.9  | 15848.39 | 6730.463 | 30970411 | 16015747 |
| 1221460  | 758796.6 | 321696.7 | 143660.5 | 492671.7 | 330033.3 | 1531135  | 2212726  | 331068.8 | 633150   |
| 539023.8 | 506301.3 | 3363.169 | 3629.531 | 19679.04 | 141125.9 | 518640.7 | 614310.6 | 0        | 32125.07 |
| 1152233  | 1461286  | 34169.48 | 28908.29 | 15315.21 | 19627.41 | 30088.21 | 11075.89 | 3387223  | 1864429  |
| 143808.3 | 59534.6  | 205889.2 | 259942.9 | 237331.5 | 673339.4 | 154783.9 | 208756.4 | 99622.14 | 74577.81 |
| 344062.3 | 60505.57 | 216846.1 | 187672.8 | 257640.6 | 413881.5 | 271785.6 | 322647.3 | 282042.1 | 355043.3 |
| 2011631  | 2384048  | 61973.98 | 65333    | 85501.53 | 413487.1 | 244812.4 | 402555.3 | 5932696  | 2644365  |
| 166118.4 | 164853   | 84119.63 | 173693.7 | 682547.9 | 1059529  | 402280.8 | 178161.2 | 9544.898 | 52433.79 |
| 4120680  | 5348393  | 0        | 0        | 0        | 0        | 0        | 6660540  | 12345291 | 0        |
| 553697.5 | 387945.7 | 160252.3 | 201342.2 | 195170.6 | 364021   | 345079.5 | 346970.1 | 102944.5 | 398384.1 |
| 554453   | 244829.6 | 134396.6 | 70839.5  | 260122.2 | 119380.7 | 817481.5 | 496503.5 | 244207.9 | 495226.1 |
| 953744.5 | 1170469  | 5390.026 | 7800.16  | 26251.18 | 170115.1 | 55175.18 | 14803.93 | 2600192  | 1786149  |
| 353766.1 | 170166.1 | 163448.8 | 150801.4 | 195245.7 | 300205   | 288211.9 | 628747   | 234096.2 | 321288.5 |
| 227552.2 | 72864.64 | 0        | 0        | 5564.416 | 390738.3 | 73729.23 | 193641.2 | 203149.7 | 186232.9 |
| 60153.13 | 43278.07 | 127049.8 | 60853.08 | 306102.8 | 1052599  | 284049.4 | 86705.63 | 15593.18 | 42944.96 |

|          |          |          |          |          |          |          |          |          |          |
|----------|----------|----------|----------|----------|----------|----------|----------|----------|----------|
| 378100.6 | 488229   | 0        | 0        | 0        | 13115.91 | 0        | 1222176  | 7316.349 | 85465.85 |
| 304289   | 354378.4 | 0        | 0        | 6022.38  | 0        | 149053.3 | 152699   | 25329.65 | 488029.1 |
| 713844.9 | 107888.6 | 511625.6 | 642671.1 | 532001.3 | 801449.6 | 506292   | 729965.9 | 565290.6 | 648217.9 |
| 747467.3 | 653159.2 | 126471.9 | 223681.8 | 196086.3 | 562417.6 | 95520.39 | 750362.2 | 61908.03 | 356446.1 |
| 2306840  | 1363163  | 249587.1 | 271513.5 | 823981.2 | 1733859  | 2557371  | 3279002  | 126393   | 2117007  |
| 4069989  | 5093876  | 113048   | 189096.4 | 138659.4 | 276027.7 | 59339.32 | 4237683  | 797101.7 | 2206438  |
| 598184   | 736090.3 | 20983.22 | 27070.65 | 40763.23 | 58706.17 | 15773.6  | 47001.38 | 1636877  | 1117440  |
| 2054222  | 2562467  | 71717.71 | 92448.01 | 93088.7  | 81318.61 | 91997.59 | 50727.49 | 5723740  | 3776867  |
| 12350256 | 11203524 | 1368700  | 1192943  | 4060626  | 4082372  | 7801058  | 28209933 | 949601   | 5191668  |
| 388804.6 | 328886.3 | 139518.9 | 168533   | 162074   | 178914.2 | 28852.36 | 330602.5 | 43067.01 | 139041.8 |
| 5676954  | 6601048  | 361565.5 | 404258.5 | 406697.4 | 940441.1 | 951133.7 | 817068.7 | 16493442 | 7469025  |
| 188961.9 | 86572.12 | 6167.226 | 5856.639 | 63243.72 | 210651.4 | 198508.2 | 178830.1 | 121856.4 | 206133.8 |
| 3.16E+08 | 3.45E+08 | 2017471  | 395715.9 | 8475605  | 41200583 | 1.95E+08 | 8.74E+08 | 5651.504 | 2.92E+08 |
| 111828.8 | 99602.59 | 2998.294 | 2434.908 | 6950.027 | 17148.63 | 126973.4 | 216054.5 | 16624.45 | 44746.59 |
| 117166.8 | 137688.9 | 3970.766 | 24114.28 | 0        | 18839.76 | 10928.78 | 71436.87 | 5158.832 | 5134.997 |
| 4478870  | 5749374  | 41533.43 | 62539.79 | 30769.08 | 116236.4 | 110482.1 | 18699.03 | 13214067 | 7430692  |
| 453921.2 | 375490.5 | 0        | 9704.032 | 3354.164 | 316415.2 | 422529.2 | 975090.4 | 27122.12 | 232674.5 |
| 11325706 | 6464041  | 56898.46 | 27239.81 | 400240.8 | 3028767  | 18094050 | 18452418 | 2192095  | 7526704  |
| 185270.6 | 134725.5 | 3261.395 | 0        | 6815.382 | 89382.74 | 239046.2 | 218743.1 | 119870.9 | 166683.4 |
| 208205.9 | 263964.7 | 16945.84 | 4822.827 | 0        | 9221.853 | 0        | 229690.6 | 0        | 0        |
| 300141.2 | 278492.7 | 29260.52 | 19747.89 | 13553.9  | 255986.9 | 97406.09 | 103924   | 732687.3 | 427828.7 |
| 209580.4 | 245574.7 | 2272.729 | 3471.825 | 3729.169 | 16014.08 | 81597.45 | 364991.7 | 24853.68 | 80504.38 |
| 3610177  | 2032634  | 24032.76 | 18480.47 | 104409.1 | 1482682  | 5579562  | 5662178  | 704893.3 | 2543876  |
| 462652.6 | 284523.5 | 12275.81 | 0        | 20369.62 | 78298.3  | 733983.5 | 827300.1 | 55491.37 | 402624   |
| 7949077  | 2288231  | 3422632  | 5164384  | 5737510  | 7961127  | 7366189  | 7020877  | 5469388  | 6816889  |
| 211644.3 | 134594.2 | 201319.4 | 878978.1 | 411667.5 | 310193.6 | 315912.3 | 274114.7 | 80285.73 | 311266.5 |
| 264454.1 | 184722.6 | 41159.93 | 34612.91 | 179475   | 82185.04 | 247457   | 125141.2 | 260980.7 | 51351.59 |
| 4450648  | 5788363  | 43382.49 | 40823.98 | 27320.98 | 12922.68 | 18804.66 | 17528.2  | 13682121 | 6567669  |
| 312819.6 | 244907.8 | 94076.21 | 95571.81 | 123477.3 | 54786.16 | 250768.6 | 317185   | 157690.3 | 719517.7 |
| 676258.9 | 559443.1 | 103299.3 | 24445.15 | 184883.4 | 178884.8 | 680202   | 1509308  | 136630.9 | 222870.8 |
| 1387198  | 681101   | 178276.9 | 242431.2 | 198024   | 174535.7 | 2221652  | 1396139  | 378511.7 | 1144804  |
| 5620643  | 6490445  | 55388.86 | 58265.65 | 95288.57 | 773683.7 | 2312759  | 16179200 | 0        | 6390317  |
| 9456916  | 12349088 | 66170.98 | 54222.19 | 15096.02 | 26062.48 | 21852.66 | 14814.76 | 28557657 | 15198847 |
| 37623.57 | 36804.88 | 0        | 449293.7 | 154621.4 | 210660.4 | 1230700  | 96576.7  | 0        | 31171.15 |
| 1099402  | 735979.2 | 16447.11 | 4364.733 | 86990.8  | 1098080  | 1067638  | 1422857  | 206542.1 | 507647.3 |
| 269228.1 | 189455.7 | 85172.09 | 65244.31 | 126732.6 | 223919.3 | 113668.2 | 373846.8 | 23159.83 | 177108.3 |
| 542706.8 | 635576.9 | 105948.6 | 68664.46 | 62289.55 | 20011.45 | 34200.95 | 22579.58 | 1320077  | 1143694  |
| 3568759  | 4475046  | 256406.4 | 246377.4 | 194484.6 | 38172.11 | 62745.71 | 28974.68 | 10047463 | 6429950  |
| 693416.6 | 898219.3 | 2435.46  | 7949.462 | 12969.31 | 11472.28 | 12849.79 | 14952.23 | 2071694  | 1139634  |
| 1021791  | 1321812  | 12680.92 | 5398.839 | 10748.8  | 35108.87 | 14843.6  | 5881.072 | 1686727  | 3039834  |
| 692387.7 | 383062.4 | 19981.91 | 15480.58 | 10768.85 | 233451.3 | 1098101  | 880599.7 | 366738.1 | 930871.6 |
| 627721.5 | 364637.2 | 0        | 3237.944 | 9089.339 | 36922.56 | 1052312  | 892808.7 | 34672.09 | 515261.3 |
| 285939.6 | 171548   | 20321.45 | 20767.77 | 113968.6 | 279253.8 | 260333   | 338633   | 73006.96 | 223401.6 |
| 2095634  | 2738523  | 11591.92 | 0        | 4631.128 | 37267.56 | 6453.917 | 26999.38 | 6069661  | 3858320  |
| 383293.7 | 271370.8 | 153356.1 | 176349.8 | 194560.7 | 241935.3 | 115703.3 | 450000   | 162575.2 | 111718.5 |
| 52715729 | 44897400 | 8628726  | 5257658  | 16943255 | 15078325 | 44410554 | 1.19E+08 | 1073739  | 33728915 |
| 559804.5 | 494182   | 584608.5 | 406443.3 | 1625920  | 8007773  | 4453888  | 1310712  | 39235.16 | 219239.7 |

|          |          |          |          |          |          |          |          |          |          |
|----------|----------|----------|----------|----------|----------|----------|----------|----------|----------|
| 31144613 | 5910483  | 21572981 | 28352250 | 29042903 | 19470379 | 30755556 | 39937459 | 24952487 | 26648797 |
| 113914.1 | 151769.6 | 331936.2 | 543743   | 891835.6 | 2899984  | 150626.2 | 112030.4 | 26413.23 | 28869.58 |
| 2643682  | 1590706  | 3253.517 | 9546.835 | 49852.5  | 636111   | 4218321  | 3472053  | 323225.2 | 1676210  |
| 1555268  | 1641945  | 199350.6 | 240417   | 258282.9 | 403539.4 | 439451.6 | 904061.9 | 845619.4 | 1115135  |
| 1841543  | 1589513  | 51579.54 | 353399.5 | 490420.2 | 1208565  | 1008090  | 3242841  | 84539.48 | 3733075  |
| 515013.8 | 337751.5 | 7949.453 | 5956.206 | 8981.181 | 94679.15 | 801451.9 | 757733   | 45885.19 | 269584.3 |
| 839405.8 | 983714.9 | 28403.56 | 24685.3  | 21373.9  | 230401.2 | 156731.3 | 37868.71 | 2290433  | 1431542  |
| 20868178 | 26090528 | 275511.8 | 338036.3 | 458221.7 | 2057548  | 2197140  | 10793890 | 6452423  | 10835857 |
| 359197.3 | 301628.6 | 5570.587 | 2530.927 | 71785.89 | 67357.11 | 424849.9 | 470158.3 | 135154.4 | 265118.4 |
| 871361.4 | 492324.2 | 70775.91 | 51885.01 | 318479.4 | 684275.8 | 1019671  | 1003342  | 51134.64 | 867276.1 |
| 259322.2 | 174052.1 | 11410.92 | 9673.415 | 67240.34 | 202995.3 | 274289.7 | 253176.8 | 4346.616 | 335874.1 |
| 79013.54 | 67677.27 | 128704.2 | 47032.4  | 157909.6 | 723591.3 | 380788.4 | 103962.6 | 5240.924 | 52033.46 |
| 5345212  | 3486141  | 4958.833 | 0        | 27403.24 | 614662.3 | 8551456  | 7969854  | 5675.754 | 4561373  |
| 7852753  | 10230341 | 81558.12 | 97508.24 | 123725.7 | 133452.9 | 31677.12 | 33948.17 | 22728833 | 14378738 |
| 337515   | 102712.4 | 194841.5 | 183394.7 | 180659.5 | 135838.9 | 443949.1 | 329394.9 | 242458.6 | 278408.3 |
| 19319.23 | 27199.13 | 103768.4 | 381816   | 2035261  | 177852.6 | 429748.8 | 22412.7  | 0        | 5669.916 |
| 9525203  | 7651988  | 1258875  | 351236.5 | 2987918  | 3019932  | 9812471  | 9096625  | 695587.5 | 6864267  |
| 1.23E+08 | 1.35E+08 | 1081603  | 213706.8 | 4535995  | 15770489 | 77023075 | 3.44E+08 | 0        | 1.11E+08 |
| 21088436 | 4398149  | 11161443 | 14627355 | 14774085 | 24630026 | 17368766 | 20127528 | 16483000 | 19166482 |
| 13389587 | 19499328 | 13144041 | 6807287  | 28558348 | 99000609 | 1.1E+08  | 466186.3 | 21270360 | 44319945 |
| 649111.3 | 500210.9 | 61291.88 | 54544.39 | 114433.8 | 396660.5 | 634354.5 | 1400667  | 59758    | 381769   |
| 304066.6 | 400914.9 | 2613.724 | 0        | 0        | 0        | 0        | 249728.7 | 0        | 72819.23 |
| 10271676 | 12940836 | 111619.2 | 120505.2 | 172256.4 | 965540.1 | 1002771  | 5353792  | 3046917  | 5444227  |
| 43707289 | 36207427 | 8204945  | 4676022  | 8148211  | 13247213 | 43091538 | 97334152 | 357723.4 | 28899120 |
| 85655.83 | 68109.62 | 3581.83  | 0        | 3752.669 | 76668.53 | 69890.05 | 124906.9 | 0        | 42495.02 |
| 8.19E+08 | 9.13E+08 | 5639764  | 1197982  | 10234504 | 78013267 | 5.27E+08 | 2.29E+09 | 36815.36 | 7.47E+08 |
| 120168.8 | 21483.88 | 221885.5 | 48607.79 | 245276.5 | 240507.4 | 159380.4 | 90054.88 | 130909.4 | 107066.2 |
| 575076.8 | 233469.7 | 180224.4 | 274190.9 | 193081.6 | 637973.3 | 524545.6 | 442765.2 | 337732.5 | 445107.2 |
| 5547415  | 7260741  | 81142.03 | 96325.65 | 25796.45 | 49402.66 | 37012.61 | 1035229  | 17869177 | 6441059  |
| 664687.3 | 94187.85 | 377753.5 | 549833.1 | 522495.9 | 740111.7 | 581602   | 638452.9 | 525199.6 | 688707.4 |
| 1.48E+10 | 1.28E+10 | 2.36E+09 | 1.45E+09 | 4.83E+09 | 3.57E+09 | 1.26E+10 | 3.38E+10 | 3.46E+08 | 8.61E+09 |
| 473454.4 | 405723.8 | 141953.3 | 200513.7 | 171070.5 | 214715.9 | 106311.8 | 214092.5 | 159518.3 | 1163126  |
| 216682.6 | 165637.4 | 0        | 0        | 4222.856 | 26406.01 | 316217   | 116133.4 | 27137.18 | 304110.5 |
| 1115067  | 651032.9 | 34733.03 | 42691.86 | 126019.4 | 148628.9 | 1796478  | 1864624  | 222984.4 | 755316.9 |
| 45829.92 | 55734.32 | 23971.41 | 23282.42 | 121054.1 | 407807.9 | 343526.2 | 134244.3 | 4286.45  | 15609.94 |
| 3537609  | 4613216  | 0        | 0        | 19088.9  | 99006.85 | 170894.8 | 10190384 | 0        | 39933.86 |
| 12192023 | 16102447 | 45340.84 | 30359.13 | 104060   | 13418.05 | 58447.34 | 7989.585 | 37290703 | 19423446 |
| 145153   | 86007.86 | 1157656  | 1797003  | 317694.7 | 145577   | 113292   | 103999.2 | 270406.1 | 189746.3 |
| 25249026 | 25811726 | 0        | 0        | 3720781  | 6816948  | 17531461 | 40677203 | 25695.49 | 61490400 |
| 6.59E+08 | 7.28E+08 | 5617202  | 1194261  | 8639273  | 89962476 | 4.28E+08 | 1.84E+09 | 0        | 6E+08    |
| 1473904  | 1227794  | 36240.4  | 3587.595 | 56889.42 | 806260.9 | 1557153  | 3149308  | 121507.1 | 627343.3 |
| 20282.32 | 20485.67 | 271415   | 494971.9 | 810103.5 | 2962847  | 19977.54 | 24704.55 | 7558.699 | 6535.966 |
| 1172310  | 699525.5 | 13125.74 | 15346.36 | 0        | 115717.5 | 1947259  | 1830895  | 75796.62 | 1066556  |
| 182802   | 139666.1 | 81223.19 | 717578.1 | 11064309 | 3167019  | 24508156 | 68128.66 | 180441.8 | 197270.9 |
| 6E+08    | 6.63E+08 | 5196198  | 998952.8 | 9325954  | 79492306 | 3.91E+08 | 1.67E+09 | 0        | 5.46E+08 |
| 1748375  | 2274453  | 26181.9  | 26417.98 | 5682.441 | 49434.44 | 72428.92 | 837738.3 | 545107.3 | 743355.2 |
| 993534.5 | 407999.8 | 255738.2 | 254771.5 | 688200.6 | 351883.5 | 1332048  | 863165.9 | 338906.6 | 1158619  |

|          |          |          |          |          |          |          |          |          |          |
|----------|----------|----------|----------|----------|----------|----------|----------|----------|----------|
| 4.37E+08 | 4.36E+08 | 48909983 | 37560494 | 16795776 | 59126163 | 3.58E+08 | 1.12E+09 | 4465397  | 2.54E+08 |
| 1076954  | 1031793  | 3253246  | 2145941  | 8718997  | 503442.8 | 2649653  | 2759349  | 0        | 904541.8 |
| 781068.5 | 315790.2 | 1383314  | 1913916  | 236941.6 | 1814139  | 1171592  | 870153.8 | 1000445  | 240962.2 |
| 2688741  | 3356223  | 173023.5 | 104576.3 | 176749.6 | 102647.4 | 273755.5 | 334243.2 | 578886.1 | 4538520  |
| 4990555  | 2896921  | 39449.77 | 19710.83 | 82792.19 | 1881323  | 7833047  | 6969556  | 620916.5 | 3466339  |
| 1918344  | 1211511  | 153780.7 | 196836.2 | 429207.3 | 2004066  | 1684290  | 1720250  | 706274   | 928315.7 |
| 635485.5 | 432328.9 | 28657.8  | 7483.435 | 79338.51 | 106329   | 952372.3 | 948609.5 | 1166203  | 259071.8 |
| 160137   | 213136   | 0        | 0        | 0        | 0        | 0        | 527972.5 | 0        | 44647.69 |
| 351414.6 | 313005.2 | 23711.85 | 50980.96 | 143451   | 102919.6 | 249208.8 | 787494.2 | 16145.77 | 135620.9 |
| 4669028  | 5738285  | 74416.62 | 83220.43 | 146015   | 680593   | 813971.8 | 90289.06 | 14031665 | 5923872  |
| 44155.05 | 24371.47 | 82217.87 | 59553.79 | 70717.93 | 111067.8 | 28923.79 | 54869.43 | 70345.8  | 20805.64 |
| 116216.3 | 109901.3 | 34046.39 | 18183.01 | 40946.83 | 72864.57 | 0        | 6507.165 | 263611   | 151780.2 |
| 597713.1 | 338069   | 648316.3 | 649901.2 | 701938.2 | 1294744  | 1424975  | 849183.8 | 79162.11 | 433814.8 |
| 26804996 | 29754447 | 465390.1 | 0        | 0        | 2569496  | 18454820 | 75310097 | 0        | 28227755 |
| 898615.9 | 150281.3 | 1059182  | 1208336  | 1259338  | 1335755  | 676690.6 | 866879.3 | 898015.6 | 665876.7 |
| 80934.01 | 22171.26 | 722489.2 | 1351292  | 170981.5 | 110697.4 | 99172.54 | 80027.95 | 107408.5 | 97742.44 |
| 324702.4 | 410593.3 | 23052.96 | 14485.39 | 6501.056 | 0        | 39717.68 | 0        | 947942   | 536927.6 |
| 706203   | 524282.8 | 82793.78 | 98809.24 | 46725.05 | 78030.42 | 975023.5 | 908060.7 | 36120.68 | 351681.3 |
| 856505.2 | 444317.1 | 83337.97 | 71216.31 | 81710.8  | 127519.7 | 1406329  | 895708.9 | 200805.6 | 674777.4 |
| 2863289  | 1749000  | 48708.2  | 2521.958 | 65905.53 | 963197.6 | 4459381  | 4808064  | 579899   | 2087436  |
| 772942.5 | 768747.6 | 3524.902 | 2749.332 | 13748.93 | 57805.31 | 803742.5 | 1879505  | 31314.84 | 113825.3 |
| 734445.3 | 834611.6 | 91206.89 | 142391.6 | 168781   | 103024.4 | 38575.87 | 33725.37 | 1231232  | 1951314  |
| 24207337 | 21667169 | 4342422  | 3622475  | 5310950  | 10669486 | 15453122 | 33006138 | 8486186  | 24008622 |
| 252692.3 | 200460.6 | 7015.235 | 8534.491 | 40030.1  | 142334.6 | 267751.9 | 193716.8 | 38369.47 | 127773.2 |
| 21411005 | 28303361 | 272169.6 | 277387   | 350615.8 | 89462.45 | 53785.06 | 57903.6  | 65949605 | 33050396 |
| 1593953  | 1898952  | 174466.7 | 165981.7 | 167839.9 | 264893.2 | 83400.5  | 9084.78  | 3996804  | 3281022  |
| 3.61E+10 | 3.16E+10 | 5.71E+09 | 2.74E+09 | 1.18E+10 | 9.49E+09 | 3.08E+10 | 8.36E+10 | 8.07E+08 | 2.11E+10 |
| 12505253 | 16318016 | 148125.2 | 73842.3  | 158794.2 | 38479.77 | 1023973  | 38399291 | 53905.92 | 3863017  |
| 804306.8 | 419297.9 | 1263565  | 1665884  | 1294985  | 355919.4 | 1932341  | 1457089  | 603790.5 | 320520.6 |
| 2948877  | 3944445  | 0        | 0        | 0        | 0        | 0        | 4394624  | 9256283  | 297116.1 |
| 966911.5 | 533787   | 217194.1 | 100394.9 | 194783.1 | 964053.3 | 1002491  | 1566388  | 409955   | 542991   |
| 26559451 | 5383389  | 18413912 | 23664135 | 24672279 | 16927563 | 26201508 | 33974494 | 20677794 | 22363763 |
| 315828.4 | 256177.1 | 5680.701 | 0        | 3071.319 | 0        | 459611.5 | 216166.2 | 54093.93 | 280614.3 |
| 41883.59 | 40296.25 | 150872.4 | 34054.53 | 226876.4 | 781835.8 | 128409.7 | 64869.47 | 4913.142 | 5253.983 |
| 111132.2 | 35495.36 | 120338.9 | 57855.74 | 324046   | 400935.4 | 187284.6 | 67689.55 | 117023   | 84652.32 |
| 104988.8 | 138102.8 | 219394.7 | 88445.57 | 523222.3 | 77722.3  | 497779.3 | 330831   | 15272.32 | 2904.093 |
| 806631.6 | 451780.8 | 0        | 0        | 0        | 70028.56 | 1381222  | 1277396  | 114898.3 | 624726.6 |
| 1310887  | 899280.6 | 65247.87 | 48118.75 | 34931.32 | 438612.7 | 1900713  | 1682682  | 210011.2 | 603435.5 |
| 947838.2 | 871301.3 | 8965.712 | 2365.683 | 28956.38 | 314432.1 | 992651.1 | 2374228  | 0        | 709322.8 |
| 101698.3 | 23772.97 | 63070.16 | 124252.8 | 192191.6 | 206944.6 | 404448.5 | 104074.2 | 98032.51 | 123515.9 |
| 1868856  | 584735.1 | 1129226  | 4201433  | 4257838  | 3658307  | 1710622  | 1085848  | 2099572  | 2682951  |
| 3091708  | 1875978  | 141247.6 | 148266.7 | 3634412  | 2349564  | 1034035  | 5940519  | 686598.1 | 3075499  |
| 382466.4 | 273247.4 | 3651810  | 1086657  | 1434947  | 144192   | 655104   | 861020.2 | 343594.6 | 221813.4 |
| 2605200  | 2177805  | 62181.76 | 14056.21 | 237150.2 | 353685.1 | 3412348  | 2102494  | 6213306  | 2541122  |
| 4150958  | 4202639  | 1254959  | 1536133  | 919980.9 | 1258148  | 92992.48 | 59359.11 | 4974561  | 10635093 |
| 440273.7 | 199194.6 | 37722.89 | 233151.9 | 227096.2 | 493144   | 333963.3 | 355814.1 | 244369.8 | 313661   |
| 457454.8 | 250914.3 | 849316.5 | 1323886  | 2117573  | 7060990  | 794353.4 | 516954   | 389399.4 | 177619.1 |

|          |          |          |          |          |          |          |          |          |          |
|----------|----------|----------|----------|----------|----------|----------|----------|----------|----------|
| 2024025  | 1111810  | 354294.8 | 88087.3  | 469768.4 | 3041469  | 654200.6 | 2686677  | 885212.5 | 784189.9 |
| 161657.8 | 139943   | 47551.85 | 70002.4  | 84680.03 | 5358.982 | 76703.12 | 332372.7 | 34282.8  | 92646.59 |
| 610849.5 | 180903.6 | 885339.1 | 445475.4 | 1725977  | 2309390  | 640593.1 | 414943.4 | 429642.7 | 687497.7 |
| 3910641  | 2802011  | 6035.251 | 3776.177 | 125055.5 | 91998.71 | 6169874  | 5348032  | 683896.2 | 1845422  |
| 792009.6 | 669779.1 | 91483.68 | 81803.1  | 263031.8 | 165110.1 | 786165.4 | 743955.9 | 61417.15 | 556511.7 |
| 916296.6 | 517531.8 | 0        | 2868.819 | 17223.88 | 421493   | 1429616  | 1114137  | 539214   | 1196343  |
| 206244.2 | 75183.17 | 340015.1 | 451059.8 | 403073.3 | 230903.8 | 126974.7 | 230284.4 | 248340.1 | 162122.5 |
| 536322.8 | 323013.6 | 109123.2 | 154300.1 | 157769.4 | 545379.3 | 424244.4 | 868019.3 | 62244.15 | 392547.7 |
| 65274.44 | 32555.65 | 41215.77 | 4679.294 | 28286.31 | 0        | 89512.05 | 55301.72 | 57896.17 | 101005.7 |
| 172721.7 | 65433.83 | 328359.3 | 355995.2 | 36260.74 | 397141.7 | 294303.9 | 62141.73 | 182637.3 | 176032.8 |
| 5358154  | 5953714  | 0        | 0        | 678727.4 | 668977.5 | 3243633  | 7393106  | 0        | 1915730  |
| 92281.84 | 139748.8 | 184901.2 | 92918.84 | 274629.5 | 139401.5 | 368937.7 | 58364.35 | 0        | 25376.41 |
| 503239.6 | 640516.3 | 29949.25 | 49800.09 | 45730.4  | 16497.07 | 0        | 34407.9  | 1504162  | 789984.8 |
| 201799.1 | 116146.7 | 6272.188 | 2668.005 | 0        | 48201.55 | 331863.8 | 303905.3 | 30603.73 | 171640.5 |
| 133311.1 | 61385.08 | 31313.05 | 25224.94 | 65535.66 | 112754.8 | 154948.8 | 181535   | 72537.36 | 62341.63 |
| 10531809 | 13134502 | 1369372  | 2342275  | 58192.63 | 131214.6 | 97459.8  | 10387255 | 1479531  | 7629065  |
| 2432399  | 328679.4 | 1415530  | 1831280  | 1670237  | 2788614  | 2285787  | 2482099  | 2118711  | 2438339  |
| 184817.4 | 142774   | 6338.6   | 20829.59 | 22985.71 | 123204.3 | 188543.8 | 104962.1 | 56933.88 | 132670.6 |
| 19966.32 | 21590.12 | 42535.54 | 36486.85 | 133527   | 251862.8 | 7238.09  | 0        | 44184.56 | 41188.22 |
| 1759772  | 1750297  | 2261.2   | 0        | 4045.022 | 884717.7 | 1313883  | 1825943  | 11820.84 | 104748.1 |
| 192420.9 | 30262.96 | 165376.2 | 164760.9 | 1017514  | 531447.2 | 384710   | 157334.7 | 182771.7 | 219112.3 |
| 1713816  | 687232.9 | 31854.07 | 138226.5 | 196338.5 | 1366358  | 2505558  | 2060822  | 609595.9 | 1724723  |
| 355837.4 | 314412.3 | 33493.21 | 3729.317 | 3677.567 | 0        | 465913.5 | 491374.7 | 23823.39 | 172574   |
| 276388.6 | 273515.7 | 43576.63 | 15797.52 | 30617.15 | 257739.8 | 0        | 466970.6 | 7210.113 | 81943.62 |
| 3041107  | 1260111  | 3697.223 | 0        | 19897.95 | 54247.26 | 5545866  | 4223692  | 1028713  | 2665628  |
| 95098.21 | 104809.6 | 40768.09 | 60714.57 | 243815.1 | 631129.6 | 487063.4 | 162478.1 | 15967.05 | 28809.37 |
| 409758.8 | 333627.1 | 72931.79 | 4295.867 | 83550.39 | 83298.32 | 486630.6 | 907110.2 | 44300.15 | 178106.2 |
| 59059.53 | 25260.93 | 30276.34 | 129258.7 | 61056.9  | 118656.7 | 150553.2 | 42547.34 | 26626.68 | 87889.49 |
| 6854475  | 7285148  | 5534.878 | 16521.67 | 342194.9 | 976269.5 | 5633948  | 8318060  | 3177960  | 18923802 |
| 724693   | 876649.3 | 2358.096 | 0        | 9465.727 | 126540.4 | 245865.2 | 2216279  | 0        | 196235.8 |
| 496175.9 | 644695.1 | 16484.68 | 19747.04 | 19067.47 | 39339.21 | 7346.976 | 23965.38 | 1461587  | 862222.1 |
| 2082291  | 2744716  | 11157.31 | 16811.8  | 23269.75 | 121970.4 | 112673.6 | 62069.58 | 6254650  | 3533310  |
| 87878.44 | 21180.73 | 60337.41 | 105296.1 | 164788.5 | 114091.9 | 163950.8 | 93824.29 | 67854.69 | 116947.5 |
| 1103520  | 833328.8 | 77789.06 | 138505.1 | 604988.3 | 199291.8 | 1215163  | 1969795  | 99385.96 | 394826   |
| 515646.8 | 573741.6 | 2608.813 | 0        | 2863.354 | 33943.39 | 397316.9 | 1474511  | 9419.942 | 150650.2 |
| 6298058  | 4027071  | 19787.13 | 6761.393 | 110425.8 | 3339061  | 9160731  | 9542377  | 580422.3 | 3894710  |
| 599847.7 | 579905.6 | 0        | 0        | 6981.958 | 328417.7 | 476006.9 | 1542902  | 19745.21 | 261300.4 |
| 3965853  | 1978081  | 846722.3 | 613563.7 | 1058545  | 1340507  | 5966516  | 1013719  | 4406902  | 5963715  |
| 248116.4 | 115451.7 | 133645.2 | 146401.6 | 583031   | 8166664  | 7288216  | 203694.4 | 319380   | 71432.66 |
| 34780.49 | 35669.87 | 58432.18 | 35306.11 | 138631.7 | 511742.5 | 142889.8 | 48982.69 | 0        | 6554.122 |
| 5322685  | 6285021  | 670851.9 | 692011.6 | 569391.4 | 578592.8 | 955944.3 | 14508972 | 8871062  | 0        |
| 2743842  | 3716005  | 4568.137 | 7899.916 | 4928.158 | 9535.327 | 11393.5  | 1661240  | 0        | 2533458  |
| 5164238  | 3235445  | 1373957  | 3386037  | 2765109  | 1616585  | 4476988  | 5755586  | 220902.4 | 3935133  |
| 266303.2 | 81788.37 | 632715.5 | 659539.5 | 101273.7 | 759401.5 | 247910   | 260363.2 | 245002.7 | 193513.8 |
| 2141717  | 1534309  | 36211.3  | 16368.19 | 114577.5 | 1644139  | 2486213  | 4249143  | 1145070  | 2518724  |
| 1164777  | 1485206  | 118390.7 | 93322.68 | 93934.86 | 35530.54 | 17430.6  | 28808.65 | 3330938  | 2101203  |
| 160750.1 | 232093.3 | 192384.5 | 255330.7 | 610236.1 | 208019.8 | 569749.2 | 569314.6 | 0        | 94396    |

|          |          |          |          |          |          |          |          |          |          |
|----------|----------|----------|----------|----------|----------|----------|----------|----------|----------|
| 1.11E+08 | 1.14E+08 | 1038881  | 442967.3 | 3332374  | 38714636 | 86458938 | 2.88E+08 | 120938.4 | 87667280 |
| 30568.9  | 17672.19 | 15744.37 | 13892.69 | 68074.56 | 387741.4 | 394669.9 | 26982    | 4857.861 | 51915.28 |
| 2448938  | 3266051  | 12984.92 | 8509.882 | 3258.876 | 132245.1 | 80791.25 | 73908.39 | 7349611  | 4290188  |
| 13676836 | 10316152 | 57231.62 | 26498.54 | 734842.7 | 1039613  | 20769454 | 18988693 | 2342386  | 6076929  |
| 708980.8 | 623844.7 | 3751.631 | 3038.443 | 5086.181 | 400466.7 | 719299.9 | 1667714  | 21540.87 | 312603.1 |
| 2089314  | 1772664  | 205590.2 | 37499.12 | 217669.5 | 1257297  | 1956709  | 4863468  | 533807.9 | 1844037  |
| 600960.8 | 483131.7 | 0        | 6186.496 | 11279.6  | 293011   | 739970.5 | 1079381  | 61739.49 | 363177.8 |
| 1200693  | 912227.4 | 46225.02 | 19291.06 | 9617.238 | 125733.2 | 1800808  | 2071797  | 516485   | 1337827  |
| 188360.3 | 136168.8 | 119651.9 | 430035.6 | 1119753  | 249507.9 | 463904.7 | 341572.5 | 15993.92 | 312556.8 |
| 412498.8 | 289499.2 | 0        | 0        | 0        | 16923.84 | 668820.1 | 831658   | 85008.3  | 292250.9 |
| 1736201  | 2246629  | 105920.3 | 102144.3 | 105778.7 | 37350.1  | 88297.7  | 116246.8 | 5423115  | 2346742  |
| 2325363  | 1380106  | 3077.823 | 0        | 41512.6  | 18660.4  | 4018646  | 4058372  | 501711.8 | 2366266  |
| 526983.6 | 531644.1 | 0        | 0        | 13568.77 | 105194.9 | 511395.4 | 1406727  | 0        | 366975   |
| 886062.8 | 494181.8 | 3289.407 | 2526.906 | 0        | 18911.69 | 1554701  | 1448496  | 221331.6 | 1023616  |
| 276985.6 | 261683.2 | 0        | 0        | 0        | 96908.56 | 288241.6 | 585655   | 0        | 72727.36 |
| 7691062  | 6581593  | 891454.4 | 379560.7 | 4749460  | 348471.1 | 7032294  | 7486819  | 2755291  | 18815617 |
| 1109877  | 1404894  | 13983.76 | 15434.5  | 21039.32 | 35389.58 | 310016   | 3325854  | 90836.16 | 35264.98 |
| 133422.9 | 96854.59 | 0        | 3801.988 | 7910.579 | 62582.9  | 180845.5 | 170688.1 | 18933.86 | 57318.52 |
| 1853002  | 996939.7 | 1104854  | 1433004  | 1366829  | 1110908  | 529877.7 | 2124753  | 666248.7 | 952307.6 |
| 2193839  | 1839263  | 14178.8  | 53336.98 | 656227.6 | 1770026  | 1513618  | 1219694  | 932971.9 | 3698269  |
| 908423.9 | 477881.6 | 434611.8 | 1606415  | 1377789  | 2231900  | 1585548  | 846830.1 | 295372.9 | 631152.1 |
| 6218426  | 7822741  | 538790.5 | 591941.9 | 598927.2 | 475205.9 | 256001.1 | 278342.2 | 18265098 | 10019585 |
| 1674716  | 1068440  | 4376.209 | 24417.75 | 86697.73 | 215977   | 2740945  | 2253482  | 5026.088 | 1500833  |
| 4695348  | 4265757  | 33658.06 | 2748.473 | 132426.9 | 2744570  | 4356105  | 11273929 | 164448.9 | 1838832  |
| 87143.25 | 33451.6  | 155167.6 | 165952.2 | 84374.99 | 61853.62 | 175171.1 | 90588.77 | 55214.01 | 51402.68 |
| 9318439  | 12741157 | 13443.38 | 2710.168 | 10579.82 | 0        | 21614.52 | 0        | 29538669 | 14286738 |
| 41186359 | 28946902 | 6565741  | 1776060  | 11817305 | 12333336 | 54120085 | 74082419 | 9560547  | 12562427 |
| 295725.7 | 223945   | 8194.51  | 6047.579 | 7746.037 | 80383.28 | 422253.7 | 479227.6 | 45843.34 | 206213   |
| 15709.59 | 16931.34 | 4006.786 | 4103.267 | 40363.77 | 547495.4 | 525008.4 | 0        | 15060.37 | 10497.21 |
| 34327.92 | 41541.47 | 9362.52  | 269894.5 | 1236073  | 406735.5 | 3576098  | 0        | 7024.138 | 26016.56 |
| 9909712  | 2206543  | 6832785  | 8731311  | 9074760  | 5903039  | 9843687  | 12996206 | 7368059  | 8226570  |
| 1806894  | 303088.2 | 1088913  | 1469583  | 1430271  | 1988432  | 1590404  | 1954270  | 1405511  | 1640503  |
| 240711.7 | 216993.8 | 10130.81 | 13014.64 | 2874.891 | 0        | 313843.6 | 365844.1 | 13091.95 | 88893.71 |
| 2398220  | 1889825  | 1392178  | 947778.2 | 446052.3 | 1419393  | 851108   | 5551877  | 1898361  | 565056   |
| 524656.7 | 316045.9 | 5469.492 | 3699.067 | 11240.89 | 224832.9 | 816992.6 | 879145.5 | 99936.7  | 364704.6 |
| 372803.3 | 247213.9 | 93462.5  | 47078.81 | 129425.5 | 146590.6 | 456319   | 668968.7 | 89651.06 | 150042.8 |
| 1214913  | 1109762  | 457249.4 | 472218.4 | 8629521  | 3228338  | 10970351 | 1401416  | 22310.03 | 106140   |
| 468490.7 | 446700.9 | 6379.758 | 18669.44 | 19879.17 | 344789.1 | 287863.8 | 614384.4 | 45028.7  | 298610.2 |
| 7980388  | 10810814 | 126811.9 | 143388.8 | 107617.4 | 16209.54 | 64023.03 | 7514.841 | 25682898 | 11007773 |
| 173651.5 | 88520.11 | 54341.79 | 13342.32 | 65987.66 | 134497.8 | 210746.2 | 178886.3 | 46192.2  | 184222.7 |
| 906226   | 470698.8 | 432468.1 | 1603803  | 1363834  | 2227594  | 1575532  | 871688.8 | 297123.1 | 622713.1 |
| 756386.8 | 670192.9 | 341995.5 | 364481.5 | 372498.5 | 153289.2 | 94761.49 | 77750.7  | 1578710  | 1268935  |
| 1660464  | 2259320  | 6278.44  | 0        | 2770.536 | 21114.92 | 34263.19 | 8345.892 | 5301842  | 2395452  |
| 689802.5 | 727387.8 | 66645.65 | 59205.53 | 43768.01 | 405182   | 209700.4 | 267142.2 | 221214.3 | 799437.3 |
| 1640292  | 366331.3 | 1882190  | 1438385  | 2060292  | 4016758  | 2491758  | 2083573  | 1153467  | 1401490  |
| 248214.6 | 61125.58 | 247323.6 | 306752.8 | 287392.5 | 415636.8 | 277115   | 256320.9 | 216275.2 | 201855.6 |
| 4225132  | 4720964  | 193716.2 | 53344.93 | 809554.5 | 1472691  | 1360078  | 905545.2 | 382295.1 | 1214400  |



|          |          |          |          |          |          |          |          |          |          |
|----------|----------|----------|----------|----------|----------|----------|----------|----------|----------|
| 50098956 | 68697703 | 0        | 7035.243 | 0        | 66330.18 | 109708.4 | 2764319  | 99655919 | 1014820  |
| 5300297  | 3064271  | 801107.4 | 739572.4 | 2579944  | 4330199  | 5581710  | 8431124  | 437418   | 4516296  |
| 739537.1 | 921423.9 | 56943.27 | 72978.3  | 82838.66 | 89785.69 | 39411    | 48048.41 | 2134901  | 1226354  |
| 10217408 | 13452424 | 408757   | 404368.6 | 413288.3 | 593513.9 | 283156.3 | 446925.3 | 31141326 | 16361548 |
| 1034993  | 683546.6 | 14869.44 | 14751.71 | 35697.57 | 34524.19 | 1714416  | 1886349  | 182272.2 | 809972.9 |
| 322441.5 | 372457.8 | 78414.01 | 99535.25 | 42585.85 | 25188.68 | 9276.289 | 9101.485 | 869440.8 | 533589.3 |
| 3639014  | 1266531  | 2202355  | 7402210  | 8055900  | 6706188  | 3571835  | 2242156  | 4041417  | 5598097  |
| 1599891  | 288412   | 836129.8 | 975107.1 | 1183315  | 1852051  | 1486920  | 1302960  | 1710583  | 1282655  |
| 71696.66 | 63575.98 | 0        | 0        | 0        | 82817.52 | 28719.8  | 54107.55 | 7131.898 | 24731.71 |
| 3208177  | 2266347  | 1117797  | 1433002  | 230410.4 | 702487.4 | 3691876  | 6123771  | 860338.2 | 1368921  |
| 1477017  | 1540842  | 82645.63 | 111201.2 | 115643.5 | 859729.2 | 578398.6 | 4147057  | 300062.5 | 588334.8 |
| 15904.87 | 13535.27 | 115518.9 | 26663.18 | 161661.7 | 531736.3 | 13290.02 | 38310.92 | 5246.537 | 6668.243 |
| 3984759  | 3764342  | 190381.7 | 194643.8 | 463739.3 | 2769213  | 2396967  | 2395492  | 262345.3 | 1661032  |
| 3976307  | 5257550  | 52016.65 | 73657.95 | 63696.35 | 298648.2 | 284783.2 | 1965371  | 1249068  | 1706932  |
| 163579   | 48943.97 | 6787.756 | 0        | 0        | 0        | 306267.6 | 199715.2 | 97581.22 | 217750.5 |
| 1233781  | 1674706  | 5358.796 | 7013.901 | 6826.718 | 12556.24 | 51162.16 | 77926.52 | 3960643  | 1748093  |
| 583826.2 | 189509.7 | 223622.7 | 359692   | 399258.9 | 597772.9 | 541487.5 | 377286.8 | 412092.9 | 584072.2 |
| 5541135  | 3177694  | 51225.58 | 73016.38 | 152435.3 | 1305401  | 9252960  | 7266273  | 884061.7 | 3611465  |
| 246761.7 | 192649.8 | 447022.9 | 701031.7 | 1108327  | 3866818  | 412282.5 | 240251.6 | 179038   | 108727.2 |
| 122188.2 | 56858.09 | 167331.6 | 205755.5 | 190499   | 995364.8 | 329662.5 | 159691.7 | 97029.35 | 61480.62 |
| 7869236  | 1139461  | 4774024  | 5982987  | 6264214  | 9446707  | 5885957  | 8518007  | 6251124  | 7336330  |
| 14493476 | 19820489 | 46611.65 | 35712.93 | 76742.86 | 111463.3 | 298241   | 46111.04 | 43977286 | 26174257 |
| 412204.9 | 248881.8 | 138678.5 | 187682.7 | 71022.29 | 365072.4 | 347534.5 | 232351.4 | 191318   | 271292.6 |
| 221851.4 | 275249.7 | 0        | 3113.619 | 0        | 0        | 105194.3 | 285160.2 | 5500.04  | 128099.8 |
| 13620.64 | 10495.54 | 0        | 93372.11 | 861446.3 | 329094.9 | 2468537  | 27991.75 | 17419.16 | 7896.527 |
| 618665.9 | 511131.2 | 84233.14 | 136119.2 | 120213.2 | 609939.9 | 234888.6 | 573761   | 144361.5 | 220500.8 |
| 258575.4 | 251265.6 | 63527.47 | 53653.49 | 37678.88 | 122972   | 103198.3 | 423799.3 | 28856.83 | 63866.98 |
| 496380.1 | 495907.9 | 10578.24 | 10328.17 | 15242.92 | 63426.8  | 521242.7 | 766152.6 | 51971.57 | 210967.5 |
| 1669534  | 2024328  | 188795.1 | 206710.2 | 170657   | 352490.3 | 97346.74 | 49217.9  | 4556956  | 3020336  |
| 780997.2 | 578967.6 | 284070.2 | 336647.1 | 257679.7 | 193786.4 | 699216.5 | 521304.9 | 1712094  | 853482.8 |
| 1006145  | 786681.7 | 264365.7 | 369299.1 | 320876.1 | 689515.9 | 522950   | 440097.9 | 1903711  | 1811958  |
| 20672079 | 11574583 | 5724323  | 2249287  | 9975014  | 7113126  | 27910659 | 32460345 | 5957831  | 10945241 |
| 710605.1 | 531524.9 | 97880.14 | 79350.53 | 193579.7 | 207993.6 | 879959.2 | 739204.4 | 65604.41 | 531374.7 |
| 1336038  | 628062.7 | 0        | 0        | 0        | 12887.83 | 2442065  | 2236208  | 484151.7 | 1412342  |
| 1078083  | 735354.8 | 102653.1 | 90737.97 | 1083905  | 326583.9 | 890943.8 | 1801300  | 260819   | 339987.6 |
| 1476887  | 1985625  | 0        | 6790.948 | 148711.5 | 7002.113 | 41258.81 | 2105301  | 0        | 229006.7 |
| 415863.1 | 349449.4 | 42203.74 | 143588.7 | 237029.5 | 105697.2 | 275160.2 | 895901.4 | 118579.8 | 157876.9 |
| 553131.5 | 389995.4 | 48252.36 | 8402.642 | 89178.71 | 681018.4 | 347241   | 304479.9 | 173913.5 | 337865.7 |
| 72401280 | 38030197 | 44495851 | 1.22E+08 | 96663963 | 1.65E+08 | 1.26E+08 | 77600460 | 24496134 | 47596265 |
| 987990.1 | 1334559  | 15706.4  | 0        | 47567.96 | 13598.58 | 38324.76 | 16012.57 | 3070952  | 1590506  |
| 346536.2 | 290126.3 | 10613.33 | 3036.024 | 62470.4  | 92137.85 | 429102.2 | 715673.1 | 127031.4 | 330236.7 |
| 30823.23 | 27658.68 | 54925.32 | 25787.82 | 168468.3 | 712206.7 | 199135.8 | 71474.51 | 0        | 12621.19 |
| 1722964  | 1587122  | 49413.6  | 37292.34 | 84007.26 | 350401.8 | 2018608  | 4347593  | 237975.9 | 741077.5 |
| 1673014  | 2282442  | 6997.227 | 17075.11 | 8990.667 | 60835.92 | 24008.25 | 31386.17 | 5336901  | 2472211  |
| 516077.6 | 303423.9 | 34603.85 | 21349.15 | 8226.386 | 154270.8 | 834174.6 | 836267.4 | 16266.99 | 595567.9 |
| 143985.8 | 79253.67 | 213230.9 | 263008.6 | 328747.3 | 901666.6 | 131668.4 | 138297.1 | 128026.5 | 74837.89 |
| 6366703  | 13607340 | 53608013 | 49013048 | 1.5E+08  | 208792.3 | 680815.4 | 402993.6 | 30707927 | 245867.9 |

|          |          |          |          |          |          |          |          |          |          |
|----------|----------|----------|----------|----------|----------|----------|----------|----------|----------|
| 341998.6 | 220304.7 | 0        | 5887.859 | 7909.822 | 60071.3  | 560622.4 | 424627.8 | 23772.12 | 209979.9 |
| 181692.3 | 133729.7 | 163189.2 | 179752.1 | 247038.5 | 638467.6 | 904407.2 | 186741.4 | 128211.8 | 160153.6 |
| 558709.2 | 750592.4 | 10620.45 | 3089.738 | 9337.429 | 44524.78 | 19095.06 | 257378.2 | 5603.822 | 508096.9 |
| 190729.3 | 93177.66 | 30994.72 | 29815.63 | 28384.39 | 62044.46 | 303780.7 | 336359.1 | 103324.3 | 157162.9 |
| 1.24E+08 | 1.31E+08 | 2525875  | 1066533  | 2867861  | 36546022 | 1.01E+08 | 3.37E+08 | 10131    | 91585379 |
| 1442976  | 1956658  | 0        | 3660.121 | 5474.383 | 24442.56 | 129727.1 | 126383.1 | 4532265  | 2258828  |
| 6864353  | 9358268  | 18244.7  | 11714.89 | 38487.29 | 28646.32 | 501985.4 | 291037.6 | 21855808 | 10289904 |
| 10129677 | 6041919  | 18848.65 | 10925.62 | 193117.4 | 166118.2 | 17679120 | 17595100 | 2203160  | 10294668 |
| 557655.9 | 177298.1 | 239215.5 | 288337.4 | 288729.9 | 555116.2 | 609843   | 667702.2 | 326775.1 | 412762.6 |
| 2100651  | 2229392  | 92263.55 | 44862.8  | 220199.9 | 1366372  | 691636.6 | 348017.7 | 5494902  | 3262432  |
| 314270.6 | 175254.6 | 575128.5 | 2321914  | 73133.09 | 409603.3 | 3496124  | 512834.9 | 62587.79 | 255235.5 |
| 999550.3 | 880192.7 | 109230.2 | 92063.96 | 129968.9 | 473185.7 | 933069.8 | 529135.2 | 145809   | 430400.1 |
| 1918143  | 2408373  | 203646.1 | 224609.5 | 215903.4 | 183660.1 | 95546.79 | 37449.61 | 5479672  | 3337570  |
| 313594.5 | 372285.3 | 59361.94 | 50659.96 | 69479.53 | 28326.84 | 20854.58 | 8076.711 | 592112   | 823131.5 |
| 3280970  | 4447941  | 16633.36 | 10157.21 | 23367.46 | 151990.3 | 209961.9 | 1655421  | 722809.5 | 1506918  |
| 817220.7 | 541132.2 | 83398.87 | 11067.06 | 179342.2 | 215143.7 | 1210002  | 719670.9 | 89150.84 | 597983.3 |
| 515311   | 307600.9 | 0        | 4499.254 | 14622.19 | 0        | 901089.2 | 914441.1 | 101942.4 | 561741.3 |
| 331806.9 | 249438.3 | 3688.627 | 19171.64 | 0        | 27745.97 | 514114.3 | 363644.2 | 0        | 235290.7 |
| 64914.57 | 16439.15 | 79707.23 | 116342.8 | 82725.86 | 98488.25 | 47621.51 | 52646.51 | 66061.88 | 70527.67 |
| 3093284  | 3802458  | 0        | 4252.996 | 0        | 662582.6 | 1114333  | 8495398  | 8482.279 | 119950.2 |
| 1453626  | 2015683  | 0        | 0        | 0        | 11678.29 | 16517.37 | 9838.929 | 4706706  | 2124762  |
| 1331004  | 1190916  | 14139.04 | 5819.249 | 12280.14 | 488157   | 1565784  | 2314002  | 255487.3 | 877363.4 |
| 4989513  | 5098591  | 209448.4 | 44870.66 | 342275.9 | 830431.2 | 4752560  | 11609762 | 0        | 9232324  |
| 14827288 | 17408838 | 864137.9 | 677997   | 2403894  | 7254687  | 244176.9 | 41680595 | 5119602  | 165730.2 |
| 4849035  | 5882169  | 593105.2 | 733003.3 | 680960   | 588970   | 531661.9 | 514582.9 | 12961488 | 9274105  |
| 6404409  | 5811593  | 613958.6 | 481541.2 | 1087774  | 1321099  | 6837924  | 11439337 | 315236.3 | 5009637  |
| 974196.2 | 1220451  | 16083.87 | 0        | 28983.49 | 416658.4 | 24700.54 | 373611.2 | 0        | 55121.75 |
| 29991779 | 17844044 | 198339.8 | 129257.7 | 1432878  | 4137882  | 51036490 | 41352798 | 3815331  | 18959475 |
| 38589191 | 41012711 | 31606.18 | 0        | 5185497  | 8123281  | 30609403 | 66774690 | 6407.632 | 94043939 |
| 154181.6 | 113468.6 | 13795.08 | 6223.083 | 33042.89 | 189821   | 78761.82 | 332359.6 | 42327.96 | 161096.2 |
| 3166412  | 4418374  | 0        | 0        | 0        | 0        | 0        | 3624305  | 10654005 | 347660.5 |
| 2295293  | 1177029  | 186897.7 | 154647.1 | 272246.8 | 1724094  | 3265064  | 2994308  | 2560856  | 1340915  |
| 57545741 | 80215024 | 107375.3 | 75370.2  | 140301.1 | 15278.87 | 95774.05 | 139846.4 | 1.89E+08 | 79137742 |
| 5320883  | 3098148  | 1875332  | 852513.2 | 898875.8 | 2241985  | 7360606  | 9141570  | 1518099  | 3034327  |
| 6391075  | 8454526  | 225677.1 | 300269.4 | 273752.1 | 462715.6 | 434090   | 3558929  | 1465926  | 2815292  |
| 1088720  | 286620.8 | 787331.6 | 931688.6 | 895431.9 | 993438.1 | 795824.7 | 1187014  | 816928.2 | 856731.2 |
| 7.58E+08 | 9.98E+08 | 1297368  | 1.72E+08 | 41384966 | 729045.4 | 2026183  | 2.51E+09 | 9860580  | 3.73E+08 |
| 62105.63 | 38772.85 | 146525.8 | 177657.2 | 279199.5 | 1601081  | 314956.9 | 102855.2 | 91803.26 | 28151.41 |
| 3229923  | 1333723  | 386367.8 | 497716.9 | 2562081  | 2100648  | 4029239  | 4502829  | 1301193  | 3495208  |
| 1092634  | 1005517  | 158471.4 | 108278.9 | 261640.4 | 334689.7 | 943705.9 | 2590860  | 99489.25 | 251105.1 |
| 1526850  | 784079.5 | 422005.4 | 153515.7 | 483323   | 1627980  | 1556311  | 2571456  | 411389.9 | 1500688  |
| 868721.3 | 544715.5 | 598003.5 | 654735.3 | 578704.1 | 410697.9 | 96891.66 | 1115453  | 125664.6 | 468363.6 |
| 433927.8 | 274241.7 | 2582736  | 1084075  | 4071845  | 112518.9 | 312720.2 | 521478.1 | 0        | 518599.5 |
| 135687.5 | 136737.3 | 7160.24  | 7233.592 | 0        | 17892.66 | 141082.9 | 273287.4 | 5993.009 | 6985.749 |
| 99381.6  | 53678.87 | 81219.31 | 105320.3 | 136361.7 | 231236.8 | 232318.4 | 118060   | 40047.8  | 49255.61 |
| 723126.8 | 971740.6 | 27197.75 | 22595.94 | 15753.67 | 20782.95 | 61157.29 | 26457.55 | 2300448  | 1030118  |
| 135094.8 | 37229.65 | 160533   | 234727.4 | 217862.8 | 299413.4 | 75054.63 | 115816.4 | 155230.4 | 78522.2  |

|          |          |          |          |          |          |          |          |          |          |
|----------|----------|----------|----------|----------|----------|----------|----------|----------|----------|
| 2318349  | 2476469  | 512075   | 602079.5 | 615930   | 200405   | 816438.4 | 795676.2 | 6223307  | 3347558  |
| 5590408  | 5754970  | 1467966  | 1012311  | 1014950  | 665457.9 | 3187986  | 2419405  | 2922931  | 5454420  |
| 145911.5 | 41458.39 | 201279.6 | 185389   | 177715.7 | 149110.4 | 169997.3 | 203094.3 | 101252.2 | 123616.4 |
| 36852392 | 43271010 | 892331   | 717009.4 | 3174961  | 22565068 | 1664943  | 6346338  | 345954.2 | 1.02E+08 |
| 809796.9 | 359073.5 | 3156.395 | 0        | 13167.07 | 7955.706 | 1499580  | 1344610  | 599497.4 | 505150.7 |
| 73769974 | 1.03E+08 | 422491.9 | 463491.3 | 417404.4 | 17390.18 | 1163333  | 55352.21 | 2.4E+08  | 1.07E+08 |
| 2527788  | 2272316  | 370924.5 | 97269.12 | 430355   | 1071708  | 2349866  | 6194078  | 0        | 1682400  |
| 557410.5 | 608163.8 | 2430.377 | 7933.705 | 58955.85 | 382572.5 | 147951.6 | 1508963  | 7290.607 | 42820.33 |
| 19694063 | 27602069 | 23893.11 | 18454.63 | 47595.3  | 0        | 10313.58 | 39143.16 | 64488546 | 28300087 |
| 425173.5 | 538184.2 | 60637.91 | 51411.59 | 61524.98 | 5120.383 | 29220.23 | 0        | 1187713  | 797644   |
| 313702.9 | 96168.83 | 272345.9 | 338095.6 | 66386.1  | 89019.83 | 290872.4 | 204941.7 | 252879.8 | 317015.6 |
| 399880.9 | 251080.2 | 2982.849 | 0        | 0        | 51099.94 | 680078.8 | 589763.2 | 54375.99 | 248210.1 |
| 0        | 0        | 0        | 71384.42 | 584963   | 163196.4 | 1708483  | 0        | 0        | 0        |
| 27854393 | 33458310 | 821407.8 | 0        | 1931274  | 1460241  | 15368285 | 82228788 | 0        | 36667545 |
| 172967.4 | 77539.48 | 93919.23 | 99453.24 | 70273.63 | 94016.21 | 202027.7 | 136963.3 | 207779.3 | 61436.16 |
| 365671.9 | 187473.7 | 249813.7 | 241553.1 | 292052.7 | 246259.4 | 118634.3 | 392428.8 | 184252.1 | 160343.7 |
| 3716968  | 2300623  | 959120.7 | 502389.5 | 1508255  | 1091679  | 5004935  | 6722003  | 1077616  | 1949174  |
| 4322378  | 4552007  | 398636   | 410017.2 | 590060.3 | 1751068  | 2201115  | 1642699  | 760813.5 | 1651714  |
| 2596020  | 3201408  | 300722.4 | 155596.2 | 420720.1 | 83465.4  | 627649.5 | 8161730  | 65912.59 | 2144068  |
| 1454338  | 2035719  | 10998.52 | 5416.462 | 6297.699 | 12887.3  | 0        | 192202.9 | 4907147  | 1710351  |
| 526646.6 | 300982.4 | 65047.38 | 267555.1 | 392097.1 | 413364.7 | 377922.2 | 326979.8 | 161621   | 879295.2 |
| 62661.37 | 77934.24 | 85066.02 | 38469.51 | 182094.9 | 513722.8 | 175858.3 | 66393.34 | 18113.3  | 0        |
| 446681.7 | 300070   | 80550.63 | 50804.65 | 129532.5 | 192573.8 | 578499.7 | 795797.4 | 160965.7 | 251806   |
| 1389033  | 916538.3 | 16377.82 | 15477.01 | 17527.18 | 560734.3 | 2145306  | 1905847  | 96274.88 | 771028   |
| 866832.3 | 1044054  | 37655.27 | 46335.16 | 67733.53 | 261949.5 | 211060.1 | 116093   | 2495478  | 1336322  |
| 1112845  | 443370.5 | 276366.6 | 412878.3 | 419973.3 | 1405061  | 956014.5 | 1353860  | 624912.9 | 707685.2 |
| 19515.54 | 16619.39 | 185592.8 | 99891.67 | 219417.1 | 1014530  | 12007.68 | 10572.65 | 13076.98 | 14146.97 |
| 70843.11 | 54064.42 | 14812.19 | 11841.03 | 23120.33 | 30446.58 | 74190.48 | 84228.47 | 7743.227 | 32333.26 |
| 1572545  | 2183084  | 26192.76 | 13291.23 | 42763.65 | 14088.83 | 25173.79 | 826011.7 | 12109.23 | 1421996  |
| 3883938  | 5458445  | 8526.226 | 4976.273 | 0        | 44887.86 | 9252.021 | 6736.668 | 12752053 | 5565700  |
| 1256550  | 1028394  | 0        | 0        | 0        | 14809.17 | 1934441  | 1816766  | 156231.4 | 501787.5 |
| 32061596 | 4797294  | 24161638 | 24856999 | 24624586 | 36795674 | 26797962 | 33282300 | 25814783 | 29644912 |
| 5839634  | 5109182  | 224515.1 | 173918.9 | 5945190  | 2708405  | 1278737  | 4046349  | 28909.65 | 3548916  |
| 2316594  | 3102569  | 193107   | 190307.9 | 73918.34 | 52601.93 | 83599.66 | 55841.19 | 7262430  | 3479980  |
| 159364.8 | 137435.3 | 401615.9 | 2214558  | 894738.5 | 232214.4 | 109070.7 | 91333.46 | 157741   | 396219.2 |
| 1411398  | 690880.3 | 23491.24 | 5217.942 | 26177.15 | 154139.4 | 2547531  | 2519729  | 1034274  | 1044740  |
| 104527.3 | 40847.3  | 67989.91 | 63981.04 | 83967.92 | 62565.02 | 96570.71 | 104937.9 | 64411.66 | 63083.96 |
| 1448805  | 1786183  | 167747.8 | 233598.4 | 220511.3 | 234189   | 68471.13 | 138080   | 3268132  | 3536120  |
| 1327710  | 1042863  | 441586.2 | 809570.5 | 519150.5 | 947316.4 | 188023.7 | 1106895  | 277923.4 | 419628.3 |
| 439461.3 | 540196.6 | 71295.4  | 78166.14 | 57667.25 | 48655.11 | 30895.25 | 14944.44 | 1143739  | 902822.5 |
| 517662.4 | 336235.2 | 1092578  | 1109989  | 831840.5 | 767938.3 | 297524.3 | 245488.5 | 437854.5 | 959596.5 |
| 2533286  | 1634997  | 3012.491 | 18864.76 | 27012.12 | 35423.63 | 4384863  | 4558777  | 480546.7 | 2616382  |
| 81755.48 | 61192.32 | 48371.41 | 8742.191 | 186705.2 | 724135.6 | 622349.6 | 171393.6 | 32809.07 | 95754.09 |
| 17045.41 | 19369.37 | 16261.94 | 25138.46 | 74902.15 | 371427.4 | 113962.9 | 34198.63 | 3945.871 | 5376.457 |
| 2292155  | 1808879  | 0        | 4527.643 | 538484.7 | 989113   | 2877078  | 5263500  | 546794.3 | 1322294  |
| 22494337 | 22744824 | 5389113  | 486686.9 | 12786829 | 4367052  | 8638193  | 55784536 | 0        | 12895139 |
| 204061.2 | 150259.6 | 3212.268 | 0        | 0        | 0        | 335928.7 | 434602   | 20312.83 | 215564.3 |

|          |          |          |          |          |          |          |          |          |          |
|----------|----------|----------|----------|----------|----------|----------|----------|----------|----------|
| 408811   | 526310.1 | 4023.492 | 4158.258 | 10829.73 | 113902.5 | 49848.44 | 194063.5 | 228918.3 | 148991.3 |
| 260493   | 296285.8 | 2228.912 | 0        | 13546.41 | 47645.43 | 182542   | 567076.8 | 0        | 593152.5 |
| 133044.6 | 71213.75 | 188829.8 | 114814.1 | 327719.1 | 136169.5 | 265692.7 | 122676.1 | 37571.09 | 108639.3 |
| 286893.9 | 192147.6 | 75665.14 | 110797.5 | 86123.55 | 239409.7 | 223807.8 | 171446.9 | 119571.2 | 159126.9 |
| 343611.9 | 246158.2 | 2489.21  | 2278.514 | 6964.392 | 105158.6 | 526791.1 | 601232.4 | 16697.62 | 194328.9 |
| 329701.5 | 336330.3 | 2166.204 | 0        | 13103.87 | 86555.01 | 323601.6 | 331617   | 13059.78 | 79011.74 |
| 643435.6 | 522572.5 | 19585.13 | 21053.89 | 86070.81 | 545798.7 | 581165.8 | 1305150  | 265743.3 | 545890.6 |
| 174433.1 | 153582.3 | 13916.7  | 47569.71 | 23540.43 | 132948.9 | 102590.6 | 99621.3  | 40637.06 | 66603.39 |
| 88057.95 | 74453.38 | 76040.49 | 97584.06 | 42841.59 | 1812174  | 1499084  | 217858.4 | 36797.89 | 54975.35 |
| 19196456 | 11143539 | 20935098 | 97692.85 | 67136017 | 46213938 | 94419806 | 30725208 | 19444703 | 5127880  |
| 480343.1 | 447130.4 | 63392.21 | 32909.46 | 75488.71 | 153442.9 | 458513.9 | 279452.9 | 56299.55 | 394835.7 |
| 911139.2 | 1093096  | 137843.4 | 167478.6 | 142039   | 227295.5 | 25419.13 | 1411435  | 27315.42 | 428939.3 |
| 80000847 | 1.13E+08 | 257913.3 | 123025.7 | 523237.5 | 425692.9 | 1452915  | 1437589  | 2.59E+08 | 1.25E+08 |
| 626245   | 567803.6 | 62137.09 | 2023.164 | 138934.2 | 107588.1 | 713402.6 | 1489681  | 49538.53 | 181839   |
| 1.24E+09 | 1.34E+09 | 8604530  | 4312439  | 17548823 | 2.61E+08 | 1.09E+09 | 3.36E+09 | 1022681  | 8.69E+08 |
| 969377.2 | 154490   | 15594.18 | 8620.525 | 44211.57 | 1475344  | 917661   | 998736.2 | 932292.4 | 912819.6 |
| 3771565  | 2327296  | 3563.866 | 5996.294 | 88934.18 | 44246.96 | 6631505  | 6334424  | 744685.2 | 4015474  |
| 640290.2 | 760555   | 95503.89 | 111831.2 | 122849.4 | 92815.95 | 99964.41 | 317078   | 118558.3 | 37899.89 |
| 152966   | 35803.51 | 47198.87 | 245385.7 | 221649.7 | 1069573  | 1810949  | 96875.75 | 159644.7 | 163252.7 |
| 247295.8 | 140876.9 | 315149.8 | 402422.3 | 220439.8 | 1326074  | 557966.8 | 190760.6 | 160652.3 | 155783.6 |
| 836064.6 | 1187730  | 0        | 0        | 0        | 0        | 0        | 0        | 2846279  | 396197.9 |
| 286516.3 | 84254.84 | 133879.5 | 425786.6 | 481829.6 | 437331.6 | 783033.1 | 415844.6 | 200311   | 274794.1 |
| 585516.8 | 611112.5 | 1695233  | 770038.2 | 4657887  | 377792.3 | 1482837  | 1536130  | 0        | 316853.4 |
| 1320598  | 1535660  | 12142.76 | 9302.742 | 90399.65 | 165405.6 | 883855.5 | 3932799  | 6414.258 | 426363   |
| 787759.9 | 874273.2 | 114786.6 | 88976.26 | 122885.3 | 255942.4 | 279094.7 | 157297.4 | 2263478  | 908597.4 |
| 11635837 | 14366848 | 547163.5 | 586978.1 | 2641255  | 1776544  | 2098335  | 36249825 | 27409.1  | 11542023 |
| 31340.71 | 19852.86 | 180390.4 | 42026.66 | 171644.7 | 811486.5 | 67179.21 | 38343.67 | 46759.68 | 24229.78 |
| 10354317 | 6365963  | 1240393  | 383753   | 2024723  | 4569532  | 15319662 | 14448422 | 1718631  | 5348491  |
| 2033329  | 1289724  | 104079   | 81260.58 | 259902.5 | 1773096  | 2489450  | 2925604  | 419608.2 | 1043249  |
| 37494583 | 21811069 | 5042716  | 1581974  | 10784845 | 17087880 | 55032674 | 51874078 | 7647888  | 20695374 |
| 75872.43 | 78125.37 | 245319.5 | 204281.9 | 485480.5 | 32115.21 | 66197.28 | 211098.9 | 14151.65 | 69863.62 |
| 324401.8 | 320214.9 | 10352.29 | 21642.24 | 4321.85  | 9295.12  | 386958.7 | 814562   | 54913.09 | 155188.4 |
| 5163454  | 3277243  | 3858542  | 3920181  | 25547660 | 20149210 | 7938816  | 3731195  | 3731506  | 1264147  |
| 4271759  | 5878461  | 11491.47 | 12841.55 | 29769.73 | 26591.91 | 636084.9 | 459887.9 | 13965097 | 5791972  |
| 342548   | 254663.8 | 5074.732 | 0        | 0        | 79806.92 | 531180.8 | 562582.9 | 14853.17 | 126459.1 |
| 4339456  | 5926786  | 240025.6 | 233742.8 | 240674.5 | 139648.5 | 43661.85 | 23399.16 | 13927071 | 6210525  |
| 265425.5 | 58212.29 | 382053.8 | 533185.3 | 48567.12 | 559667   | 610964.6 | 353455.1 | 211884.4 | 213015.6 |
| 1133549  | 882156.9 | 146903.5 | 213222.6 | 287523.6 | 235006.9 | 1422953  | 1440470  | 163766.5 | 717912.3 |
| 4889750  | 3477958  | 1230693  | 560262.5 | 1845855  | 1503020  | 6008213  | 9955799  | 1439316  | 2055991  |
| 14009294 | 11539938 | 2668750  | 2713156  | 10139397 | 4099749  | 9317846  | 30245789 | 602364.7 | 15574129 |
| 1595400  | 2248514  | 12643.19 | 15651.46 | 19339.38 | 31917.55 | 11766.85 | 609866.2 | 9930.452 | 1301379  |
| 892273.3 | 1072687  | 10539.82 | 9699.666 | 77293.11 | 64209.34 | 518524.8 | 2540947  | 0        | 395832.6 |
| 1579963  | 867916.9 | 11293193 | 17503032 | 2922213  | 1284398  | 750159.5 | 898635.8 | 2692792  | 2348004  |
| 24865333 | 35392715 | 49515.46 | 70795.12 | 90185.53 | 33427.59 | 82514.99 | 83155395 | 33764406 | 267963.4 |
| 96698.78 | 116824.6 | 96539    | 257957.7 | 598012.2 | 42677.72 | 297843.1 | 289732.5 | 5335.461 | 118766.9 |
| 428148.3 | 297252.3 | 183559.2 | 264794.9 | 234568.3 | 271510.7 | 140336   | 413334.5 | 197601.9 | 100343.6 |
| 73600.99 | 25161.12 | 110193   | 116599.6 | 121897.9 | 175958.3 | 32177.04 | 39456.85 | 77638.06 | 95941.62 |

|          |          |          |          |          |          |          |          |          |          |
|----------|----------|----------|----------|----------|----------|----------|----------|----------|----------|
| 118791.5 | 94266.8  | 9682.537 | 2389.635 | 9041.483 | 104559.1 | 112174.7 | 233911.9 | 4936.245 | 48586.02 |
| 3821885  | 5251968  | 150625.8 | 136874.9 | 304968.3 | 46460.35 | 76803.45 | 21179.47 | 12252529 | 5673670  |
| 4683388  | 4730556  | 497738.2 | 582314.9 | 725059.6 | 2632300  | 2310108  | 1693751  | 1058682  | 1329487  |
| 2716589  | 445199.6 | 2033996  | 2605722  | 2757915  | 1699896  | 2495990  | 3293534  | 2314151  | 2329600  |
| 1103433  | 1100910  | 107601.4 | 35489.48 | 188788.9 | 220545.7 | 1025872  | 2964488  | 201666.6 | 427860.6 |
| 2465155  | 3208575  | 309514.5 | 304157   | 180564.3 | 207025.5 | 105321.7 | 22387.87 | 7287614  | 4244253  |
| 15088462 | 21480677 | 129881.8 | 108421   | 92474.99 | 5215.958 | 36140.93 | 0        | 49667203 | 22570140 |
| 293693.6 | 165555.1 | 0        | 0        | 11706.57 | 0        | 530783.8 | 500306.7 | 111747.1 | 226111.1 |
| 78868474 | 92120543 | 1071013  | 652782.5 | 3870376  | 12079170 | 52321903 | 2.28E+08 | 10084.9  | 52273563 |
| 3160162  | 3735649  | 151436.8 | 177680.7 | 349606.4 | 1272754  | 772704   | 513136.8 | 8581777  | 5538345  |
| 861123.6 | 549995.8 | 0        | 4002.86  | 4585.204 | 15270.07 | 1510847  | 1448329  | 132623.7 | 867785.8 |
| 593676.7 | 784451.5 | 64074.79 | 69286.05 | 34150    | 44910.89 | 15466.52 | 12286.58 | 1810553  | 957426.3 |
| 135884.2 | 137745.8 | 3598.128 | 0        | 3915.463 | 12854.35 | 154895.6 | 156865.8 | 19505.17 | 80641.81 |
| 6016575  | 8565198  | 38477.23 | 52311.46 | 36743.9  | 0        | 39496.3  | 78058.02 | 19938534 | 8678235  |
| 54347.19 | 76461.22 | 182855.7 | 300293.9 | 422455   | 1694557  | 19048.52 | 20660.63 | 33120.61 | 8189.189 |
| 493255.9 | 439911.9 | 209554.1 | 216777.8 | 292574.3 | 138967.3 | 64616.96 | 134243.3 | 207917   | 457698.8 |
| 216532.6 | 101832.1 | 29402.84 | 42165.08 | 26980.24 | 11692.8  | 374036.6 | 345240   | 127572.8 | 99935.6  |
| 1171321  | 994304.6 | 210917.8 | 299995.4 | 420752.6 | 690513.7 | 738303.1 | 1415745  | 95302.76 | 367035.6 |
| 503342.8 | 332187.7 | 154972   | 204255.4 | 192281.9 | 489266   | 282935.6 | 128607   | 794621.9 | 738162.5 |
| 482397.4 | 280896.6 | 3159.319 | 0        | 0        | 114992   | 831545.6 | 782406.4 | 57054.46 | 363755.1 |
| 2618819  | 3480533  | 217724   | 223691.4 | 229814.7 | 186364.4 | 91270.23 | 14423.44 | 8117390  | 4021435  |
| 2948289  | 4213521  | 9722.525 | 7598.766 | 4790.384 | 12778.87 | 4729.687 | 1327071  | 4474.58  | 2440127  |
| 25914.26 | 25067.23 | 44171.49 | 119947.8 | 153369.2 | 1187373  | 272616.5 | 65505.13 | 10793.58 | 31369.23 |
| 11735965 | 10325987 | 307726.1 | 94384.21 | 1434117  | 4344611  | 13983953 | 17861011 | 633409.4 | 926389.4 |
| 5992.11  | 10717.2  | 0        | 204236.3 | 62237.16 | 594817.4 | 26650.75 | 0        | 5229.82  | 0        |
| 428949.1 | 543574.3 | 3572.28  | 5843.402 | 0        | 0        | 232730   | 103509.6 | 19139.65 | 634776   |
| 11767778 | 16731801 | 30831.3  | 43828.82 | 122601   | 121259.8 | 220910.8 | 47046.97 | 39277469 | 16108129 |
| 26100307 | 23336871 | 169906.6 | 98854.96 | 615590.7 | 5047030  | 35048385 | 47736954 | 5808937  | 17866926 |
| 272618.8 | 322062.1 | 28394.8  | 72813.4  | 13185.98 | 112142.2 | 12068.45 | 215378.7 | 4512.417 | 19953.67 |
| 5230944  | 6380508  | 262035.4 | 66003.51 | 396746.3 | 896996.3 | 2261815  | 16283955 | 695215.7 | 1707375  |
| 3373511  | 2122179  | 27895.13 | 18657.04 | 70276.49 | 2188633  | 4956818  | 4831730  | 492920.8 | 2172571  |
| 182110.9 | 133823.4 | 61198.4  | 47494.44 | 335905.1 | 3827679  | 2862947  | 184954   | 14125.94 | 103955.4 |
| 15640406 | 22398083 | 46825.51 | 76649.33 | 76704.56 | 0        | 64798.21 | 96035.33 | 52028540 | 22650519 |
| 466071.5 | 652092.8 | 7213.201 | 2096.081 | 24224.18 | 0        | 28212.33 | 23261.84 | 1531647  | 654381.2 |
| 269590.3 | 106806.8 | 129022.6 | 175224   | 144424.1 | 254289.1 | 249298.4 | 308335.4 | 108879.4 | 222023   |
| 14306748 | 18086623 | 198326.1 | 233444.4 | 5931499  | 18341.17 | 2105753  | 38743209 | 0        | 3462857  |
| 101787   | 87564.75 | 183428.4 | 356767.6 | 502552.1 | 110661.4 | 39811.11 | 188542.6 | 200521.4 | 69456.44 |
| 421253.6 | 199295.9 | 0        | 0        | 4396.522 | 25336.1  | 782087.3 | 759951.5 | 283056.2 | 321024.9 |
| 5076878  | 1131345  | 3169426  | 3718805  | 3665435  | 5680316  | 4419178  | 5608312  | 3795294  | 4792945  |
| 114038.9 | 73832.77 | 118668.2 | 108503.6 | 155654.8 | 749385.1 | 404949.5 | 75116.23 | 98791.01 | 32848.71 |
| 8548971  | 1397373  | 5983876  | 7663573  | 7937164  | 8903753  | 6476592  | 9056808  | 7153281  | 7169352  |
| 678193.2 | 210580.7 | 12236.1  | 8814.22  | 31084.77 | 52973.99 | 1283487  | 1022620  | 729513.6 | 584905.2 |
| 181440.5 | 182186.2 | 158330.5 | 134935.9 | 387838.6 | 1466301  | 708556.8 | 343004.2 | 0        | 83921.18 |
| 198212   | 149356.9 | 0        | 3084.928 | 8342.874 | 20867.53 | 315793.6 | 442391   | 67523.15 | 214475.6 |
| 76724.98 | 58047.44 | 826883.8 | 1411405  | 189079.7 | 58615.23 | 7531.959 | 20473.56 | 154417.2 | 121520.3 |
| 459631.9 | 308117.3 | 3305.772 | 0        | 11805.19 | 446709.7 | 540070   | 838389.4 | 182787.8 | 480168.3 |
| 2.43E+09 | 2.62E+09 | 18866539 | 5840504  | 30228211 | 6.73E+08 | 2.12E+09 | 6.56E+09 | 746255.2 | 1.78E+09 |

|          |          |          |          |          |          |          |          |          |          |
|----------|----------|----------|----------|----------|----------|----------|----------|----------|----------|
| 985751.5 | 1407550  | 7806.566 | 6348.523 | 4680.591 | 8048.132 | 14222.71 | 435553.7 | 0        | 993168.3 |
| 2832794  | 2818614  | 2743.423 | 0        | 16264.99 | 106967.1 | 3568464  | 5092816  | 643495.1 | 1800655  |
| 1141816  | 1553817  | 9424.965 | 6038.221 | 3565.062 | 38893.62 | 253011.2 | 83837.41 | 3595102  | 1793330  |
| 822386   | 436633.8 | 0        | 7910.643 | 0        | 11567.4  | 1514105  | 1519560  | 604170.2 | 634375.2 |
| 570545.4 | 482677.8 | 25629.77 | 18498.03 | 9718.472 | 96381.64 | 809126.4 | 1035891  | 135752.1 | 596839.5 |
| 5372066  | 4428346  | 1327581  | 684568.5 | 2224408  | 1093245  | 5582390  | 7960460  | 0        | 4127989  |
| 91149.72 | 29974.99 | 132602.9 | 159162.8 | 140044.3 | 183872.8 | 716644.6 | 70587.67 | 99518.79 | 55543.63 |
| 1030128  | 640869.9 | 3471.385 | 3298.156 | 24076.49 | 217205.8 | 1754227  | 1780772  | 160123.7 | 661864.5 |
| 239687.2 | 293016.2 | 0        | 0        | 0        | 21043.92 | 154731.3 | 341618.3 | 13415.62 | 119728.4 |
| 59549.17 | 14998.81 | 258888   | 193134.8 | 38370.06 | 82811.78 | 56568.61 | 42406.94 | 51525.44 | 66122.92 |
| 160652.9 | 156767.8 | 0        | 0        | 4697.015 | 0        | 210933.5 | 385455.7 | 5446.905 | 55441.21 |
| 98871.18 | 54093.08 | 0        | 0        | 0        | 29125.54 | 171969.9 | 108733.9 | 10791.3  | 91245.17 |
| 2948534  | 4151925  | 110356.2 | 113938   | 85390.59 | 40481.39 | 24284.77 | 15661.24 | 9600455  | 4453497  |
| 1606154  | 246092.6 | 1025714  | 1169083  | 1476885  | 1647706  | 1566904  | 1647813  | 1331105  | 1381548  |
| 14604452 | 17598924 | 7970139  | 3419508  | 77725.1  | 260463   | 184426.5 | 203646.2 | 8327988  | 22874861 |
| 350372.3 | 190023.8 | 0        | 2927.957 | 50461.35 | 383828.2 | 419361   | 516785.7 | 54187.29 | 276808   |
| 27097842 | 32758698 | 4040210  | 156609.5 | 665472.5 | 4362801  | 12761409 | 78893117 | 188117.1 | 2985413  |
| 4126168  | 5965562  | 3744.296 | 0        | 7482.554 | 12771.41 | 7608.836 | 12383.81 | 13875583 | 5855313  |
| 4.68E+09 | 2.96E+09 | 7.36E+08 | 4.32E+08 | 2.11E+09 | 2.94E+08 | 6.98E+09 | 8.4E+09  | 1.35E+09 | 2.12E+09 |
| 1283861  | 1073907  | 146906.4 | 56435.21 | 255606.4 | 506048.4 | 1502244  | 1513253  | 89227.08 | 838417.4 |
| 909461.4 | 584702.4 | 119161.5 | 156690.6 | 163849.1 | 637804   | 1144479  | 1240935  | 105907.4 | 525518.5 |
| 354563   | 506089   | 2329.606 | 0        | 0        | 16117.94 | 7489.538 | 6138.368 | 1158403  | 556357.3 |
| 1398176  | 1399227  | 47362.11 | 66978.8  | 123453.9 | 951084.4 | 887525.3 | 902665.8 | 120138.1 | 338100   |
| 3154141  | 3734572  | 1114482  | 514568   | 3672941  | 70506367 | 86617893 | 2123278  | 9717324  | 850938.2 |
| 1138501  | 672149.5 | 377971.7 | 200989   | 745191.8 | 250382.1 | 1441944  | 1614859  | 273084.4 | 555918.3 |
| 12117726 | 17505290 | 27417.48 | 39095.68 | 51583.74 | 22231.01 | 65282.31 | 50772.88 | 41062634 | 16310958 |
| 2951859  | 2204215  | 120218.4 | 119583.8 | 64017.71 | 566602.4 | 4597340  | 6381606  | 590751.3 | 1956908  |
| 28445793 | 4145942  | 15361177 | 20511466 | 19925028 | 34544837 | 24998636 | 27846601 | 21516231 | 30027512 |
| 168061.8 | 143492.2 | 48580.17 | 28637.5  | 108848   | 28466.71 | 123339.9 | 99527.47 | 16059.47 | 103208.6 |
| 32065.22 | 43402.74 | 198266.8 | 518449   | 790251.9 | 3611389  | 85200.64 | 7704.871 | 4970.163 | 7966.609 |
| 4171570  | 2563011  | 670623.4 | 442868.2 | 1425287  | 854212.7 | 6303115  | 6151253  | 1263471  | 1582927  |
| 9650237  | 13579572 | 38989.1  | 36568.93 | 56456    | 628961.4 | 704726.9 | 4478112  | 1966070  | 4237840  |
| 476538.5 | 271186.6 | 56171.32 | 12496.93 | 86777.77 | 551482.7 | 495897.7 | 780549.8 | 192574.5 | 345018.7 |
| 194323.3 | 135359.8 | 201783.7 | 180893.8 | 443689.3 | 2000885  | 754140.4 | 316743.4 | 24652.79 | 104174.4 |
| 3.3E+08  | 3.95E+08 | 7725438  | 4181849  | 4612832  | 61157341 | 2.07E+08 | 9.91E+08 | 586602.4 | 2.96E+08 |
| 362084.1 | 412093.6 | 19940.14 | 3074.104 | 33330.3  | 66985.69 | 255526.1 | 235691.7 | 1088402  | 60092.65 |
| 230796.1 | 240618.4 | 13080.2  | 10674.57 | 9517.453 | 117131.8 | 163483.3 | 300290   | 0        | 100752   |
| 503600.2 | 309904.3 | 0        | 0        | 3707.672 | 58540.55 | 886465   | 841050.8 | 67074.25 | 314493.8 |
| 765199.8 | 1072985  | 5929.339 | 0        | 9245.93  | 49536.48 | 68956.91 | 79058.16 | 2533860  | 1040950  |
| 16732727 | 10796256 | 3167706  | 3922283  | 6497911  | 12379093 | 17774288 | 22227117 | 3181632  | 8473761  |
| 18576561 | 26209356 | 123565   | 131583.6 | 209610.5 | 922815.4 | 1362156  | 8561120  | 3743445  | 7973862  |
| 22214950 | 10556062 | 4002905  | 2116554  | 4684145  | 7974431  | 36263082 | 37475805 | 12697413 | 13671942 |
| 1267515  | 839372   | 5117.067 | 0        | 22275.63 | 142124.4 | 2177270  | 1755209  | 137001.9 | 605373.1 |
| 370246   | 460199.9 | 0        | 3961.031 | 9567.379 | 149379.4 | 102112.5 | 191369.6 | 84684.51 | 169933.5 |
| 8961.077 | 3561.488 | 9753.792 | 12223.91 | 47454.86 | 596986   | 1248610  | 6052.205 | 5252.065 | 13908.3  |
| 551738.4 | 235530   | 1459063  | 1480511  | 108469.6 | 635262.2 | 1160852  | 617639.8 | 756028.2 | 680113.5 |
| 8156698  | 8218915  | 17590048 | 12467168 | 44247530 | 4008354  | 17640988 | 21719458 | 32166.89 | 7923729  |

|          |          |          |          |          |          |          |          |          |          |
|----------|----------|----------|----------|----------|----------|----------|----------|----------|----------|
| 76434.26 | 68001.35 | 157868.5 | 1286441  | 501333.8 | 108159   | 81786.58 | 50095.37 | 71229.1  | 193162.7 |
| 108525.5 | 100015.7 | 125917.8 | 128796.2 | 106402.6 | 478835.6 | 307794.2 | 57586.52 | 7451.68  | 46477.64 |
| 490061.5 | 299642.8 | 143135.1 | 131206.3 | 147405.7 | 115024.5 | 690813.3 | 673027.5 | 31784.57 | 342756   |
| 6781662  | 5416267  | 25122.06 | 13479.23 | 364785.8 | 5640518  | 7338673  | 12755677 | 2488373  | 6341168  |
| 2128170  | 2666160  | 5758912  | 3725991  | 16411983 | 1225710  | 4512565  | 6788349  | 136861.7 | 861738.9 |
| 364696.3 | 238185.7 | 53893.88 | 35001.92 | 76088.13 | 43615.04 | 572528.3 | 560655.7 | 0        | 245961.6 |
| 9212.504 | 11651.67 | 76360.48 | 18902.87 | 118480.3 | 499236.8 | 23151.29 | 27924.64 | 0        | 5668.948 |
| 1761170  | 1295180  | 204791.1 | 94453.84 | 667425.4 | 624133.1 | 2270012  | 3304903  | 682352.4 | 405364.1 |
| 2.07E+09 | 2.19E+09 | 14550877 | 4755369  | 25291621 | 8.41E+08 | 1.8E+09  | 5.53E+09 | 1711796  | 1.51E+09 |
| 337106.2 | 238319.1 | 31434.45 | 5358.687 | 6690.494 | 44044.49 | 549143.5 | 399910.1 | 182852.1 | 58189.04 |
| 205708.8 | 124921.6 | 7635.4   | 4517.249 | 0        | 15694.08 | 363868.1 | 326803.9 | 0        | 217962.1 |
| 855935.6 | 1036135  | 0        | 0        | 3831.691 | 82884.13 | 606253.9 | 2103835  | 7418.974 | 8834.4   |
| 1.19E+08 | 1.41E+08 | 3158894  | 1589447  | 2420958  | 23788001 | 78971532 | 3.54E+08 | 387586.7 | 1.09E+08 |
| 17104329 | 24811946 | 73792.78 | 49352.9  | 145694.8 | 31598.76 | 183862   | 76971.3  | 57193083 | 25462994 |
| 4484826  | 4240591  | 51058.1  | 38099.27 | 2815604  | 1290936  | 3368416  | 10894408 | 17495.57 | 2931834  |
| 2.73E+08 | 1.41E+08 | 1.64E+08 | 4.46E+08 | 3.53E+08 | 6.06E+08 | 4.72E+08 | 2.95E+08 | 92453825 | 1.83E+08 |
| 550173   | 307810.3 | 56519.29 | 52139.64 | 72147.32 | 929570.2 | 95493.57 | 911998.1 | 190664   | 417483.9 |
| 50879.71 | 34727.96 | 10506.07 | 2622.423 | 0        | 27415.23 | 71473.66 | 89463.91 | 9658.303 | 23486    |
| 814333.1 | 599076.9 | 100687.8 | 153884.5 | 108152.5 | 425641.1 | 1018913  | 1519102  | 60208.27 | 336836.3 |
| 39796869 | 64951345 | 23523072 | 12083818 | 78431305 | 3.02E+08 | 3.75E+08 | 250704.1 | 47721817 | 1.5E+08  |
| 233839.5 | 195667   | 2666.324 | 3755.758 | 2812.261 | 56360.67 | 337556.7 | 201575.1 | 5898.023 | 129816.2 |
| 1208143  | 1740255  | 38603.43 | 21912.15 | 15892.81 | 0        | 8309.816 | 9606.33  | 4073378  | 1659920  |
| 2304184  | 2471259  | 509358.7 | 149219.6 | 171097.7 | 300432.7 | 1826969  | 6351943  | 0        | 2794232  |
| 13538304 | 13773239 | 142401.7 | 17024.64 | 403882.8 | 3584177  | 14517599 | 35892948 | 585712.1 | 10607008 |
| 316958.2 | 306823.8 | 84515.56 | 125363.9 | 103628.2 | 56901.98 | 162561   | 175442.6 | 155669.2 | 862155.8 |
| 112486.8 | 129050.4 | 18213.04 | 38305.16 | 37451.91 | 16955.77 | 9713.591 | 141047.8 | 4461.775 | 0        |
| 15884937 | 3709146  | 8240528  | 11378285 | 11167651 | 17857108 | 14522155 | 16652316 | 11813113 | 14050125 |
| 198632.2 | 83347.02 | 384698.7 | 371815.7 | 98300.57 | 895305   | 271624.4 | 169396.1 | 228134.6 | 173926.6 |
| 734481.4 | 739817.4 | 17875.51 | 0        | 250423   | 503626.4 | 338897.2 | 1561076  | 30748.77 | 52917.06 |
| 2.11E+09 | 2.17E+09 | 28909611 | 19395506 | 40680900 | 5.74E+08 | 2.21E+09 | 5.37E+09 | 31505862 | 1.4E+09  |
| 251259.6 | 192854.8 | 9872.391 | 15066.76 | 14997.19 | 101513.3 | 354344.8 | 479515.3 | 30646.95 | 172213.3 |
| 568223.5 | 427325.7 | 0        | 0        | 7179.942 | 116239   | 906740.9 | 1059233  | 17363.8  | 354260.9 |
| 5186445  | 3595605  | 495620.9 | 127035.8 | 1068898  | 2057280  | 7516931  | 9670962  | 1128489  | 1874378  |
| 215726.4 | 205488.4 | 3063.315 | 0        | 7049.051 | 36130.11 | 276671.9 | 536660.4 | 13581.62 | 59821.42 |
| 151893.9 | 147909.3 | 82713.27 | 119024.3 | 105090.3 | 2446402  | 3351321  | 76080.02 | 41419.65 | 128123.5 |
| 367034.7 | 269853.7 | 0        | 0        | 6851.615 | 0        | 623349.6 | 714920.9 | 31289.67 | 264615.4 |
| 1717859  | 1008570  | 49897.86 | 54058.09 | 179779   | 620746.2 | 2829230  | 2692856  | 256088   | 1135458  |
| 1412384  | 1021915  | 0        | 0        | 0        | 0        | 2426329  | 2552865  | 201281   | 726771.9 |
| 138995.2 | 70314.75 | 180643.2 | 217810.8 | 124970.2 | 815698.2 | 318790.1 | 182903.6 | 47511.19 | 96745.12 |
| 1706533  | 2298015  | 4782.665 | 11568.37 | 37120.48 | 143040.4 | 490975   | 477307.5 | 5541118  | 2162795  |
| 25821.88 | 46730.12 | 0        | 188650.3 | 1248697  | 360963.4 | 4027854  | 0        | 0        | 0        |
| 5325011  | 7603423  | 12352.35 | 63991.6  | 30564.17 | 332759.1 | 259768.3 | 2693063  | 859148.7 | 2188386  |
| 838642.2 | 990471.9 | 27693.63 | 12537.3  | 62195.44 | 353655.4 | 346324.2 | 372787.7 | 30680.75 | 235557.6 |
| 109962.7 | 83737.46 | 28918.62 | 23090.71 | 223924.7 | 962255.8 | 1087499  | 130752.2 | 13323.48 | 152182.1 |
| 310418.8 | 144170.7 | 79446.95 | 145773.4 | 142966.8 | 372466.5 | 237942.6 | 211169.5 | 123066.1 | 332908.7 |
| 244365.1 | 215631   | 4516.453 | 102813.9 | 99890.92 | 143706.6 | 129020.5 | 112353.6 | 155783.8 | 627655   |
| 3790797  | 3996401  | 52665.05 | 0        | 53637.41 | 600104   | 4098822  | 10748583 | 2864073  | 1418706  |

|          |          |          |          |          |          |          |          |          |          |
|----------|----------|----------|----------|----------|----------|----------|----------|----------|----------|
| 2969007  | 2385124  | 1752185  | 2168297  | 1462727  | 802612.1 | 416496.7 | 312647.4 | 465727.1 | 4135222  |
| 9549933  | 13402889 | 197279   | 240605.5 | 242760.2 | 697615.6 | 741023.7 | 4872445  | 1543325  | 4205573  |
| 3806184  | 2151699  | 355245.5 | 170481.2 | 792612.2 | 2172042  | 5735064  | 4859695  | 615935.1 | 2568848  |
| 17178580 | 22737003 | 120075.2 | 27267.64 | 5403180  | 392774.7 | 2479926  | 49445614 | 16498.37 | 2356626  |
| 1137946  | 1635448  | 12198.53 | 2641.775 | 15535.82 | 39299.41 | 55253.71 | 0        | 3847185  | 1512013  |
| 5192757  | 4374441  | 80601.06 | 111923.3 | 2279044  | 1739987  | 5895011  | 12227241 | 1110195  | 2028485  |
| 1212014  | 1759140  | 2898.107 | 7311.455 | 0        | 48140.14 | 17879.87 | 31005.24 | 4139275  | 1582949  |
| 519968.8 | 676998.8 | 70216.75 | 86844.58 | 39860.59 | 65573.17 | 36265.78 | 14601.35 | 1523814  | 920930.7 |
| 411410.3 | 309406.1 | 798919.6 | 4188456  | 1705301  | 514778.1 | 296482   | 219232.5 | 399496.3 | 945644.1 |
| 2611457  | 2322088  | 400743.4 | 112955.7 | 700686.8 | 1430314  | 2315680  | 5657322  | 157255.5 | 515866.8 |
| 1597095  | 2211090  | 143430.1 | 140141.6 | 98996.98 | 31632.4  | 61749.72 | 17034.68 | 5115366  | 2450312  |
| 295036.1 | 197701   | 31475.21 | 67215.82 | 127626.3 | 116711.6 | 379231.3 | 574064.3 | 77472.1  | 146466.4 |
| 2217467  | 1812498  | 0        | 12971.29 | 833590.1 | 1636060  | 2087614  | 4379114  | 359930.6 | 2279813  |
| 177256.5 | 203871.7 | 6251.453 | 0        | 39072.49 | 10649.75 | 130471.4 | 190317.6 | 14928.62 | 48767.87 |
| 1534077  | 298098.6 | 1518673  | 2358448  | 3767616  | 2203132  | 1224017  | 1386796  | 1468415  | 1191218  |
| 1091704  | 192145.5 | 1202262  | 1181550  | 1197755  | 1585406  | 1120088  | 1033521  | 905833.5 | 943958.9 |
| 3738485  | 1641202  | 516654.6 | 643362.3 | 2933894  | 2463740  | 4716852  | 5571968  | 1573654  | 4079375  |
| 183438.3 | 164216.8 | 0        | 0        | 4088.704 | 89266.35 | 221792.4 | 385469.2 | 0        | 34225.28 |
| 3036264  | 2318486  | 787820.7 | 437715.8 | 2277472  | 2186191  | 1454901  | 6890832  | 981743.4 | 1512503  |
| 1.04E+08 | 89452954 | 150206.8 | 11045639 | 3702560  | 7307041  | 1.53E+08 | 2.43E+08 | 707052.6 | 78081013 |
| 614683.9 | 96693.08 | 573503.3 | 695582.9 | 754641.3 | 805970.2 | 652608.9 | 750198.6 | 527618.7 | 518020.3 |
| 1157116  | 1541640  | 95439.4  | 66355.69 | 86170.5  | 129213.7 | 181754.6 | 15165.52 | 3597515  | 1778679  |
| 7312932  | 7304599  | 134758.4 | 56970.73 | 85444.01 | 975780.2 | 8992315  | 17726848 | 1230597  | 2428322  |
| 782225.9 | 333393.2 | 112631.6 | 16302.57 | 93240.33 | 1382112  | 209502.3 | 1181050  | 341890.5 | 682795.4 |
| 203544.1 | 296564   | 2896.717 | 0        | 0        | 0        | 10096.02 | 177656.8 | 14497.3  | 95785.87 |
| 817036.8 | 1170556  | 0        | 4086.849 | 4308.721 | 0        | 111828.6 | 372629.7 | 13989.3  | 819522.8 |
| 4690436  | 6824617  | 12399.41 | 12015.56 | 70703.98 | 32005.11 | 214687.9 | 23410.58 | 15929181 | 6455402  |
| 475899.3 | 335386.5 | 224879   | 249462   | 226122   | 331834.9 | 208341.6 | 209035   | 186725.6 | 342189.4 |
| 85064.41 | 110874.5 | 0        | 0        | 8233.906 | 40888.09 | 0        | 95615.86 | 0        | 60313.79 |
| 4061786  | 2525459  | 475157.5 | 137822.2 | 991497.1 | 1549234  | 6220763  | 6043853  | 694351.5 | 2038685  |
| 185776.8 | 183289.7 | 0        | 0        | 13655.71 | 73482.56 | 195927   | 197072.2 | 7095.53  | 35547.48 |
| 251104.6 | 189766.5 | 421352.3 | 2330713  | 1162096  | 291975.8 | 135909.6 | 124820   | 268963.4 | 574139.5 |
| 1635372  | 2294267  | 89487.73 | 90508.73 | 116978.6 | 28463.29 | 97157.82 | 90682.61 | 5404714  | 2260934  |
| 33140872 | 36714090 | 0        | 0        | 4681668  | 6064659  | 28668795 | 48439896 | 0        | 89099616 |
| 8432841  | 10968382 | 524501.9 | 624813.4 | 453667.9 | 1191554  | 2297897  | 406574.4 | 25605509 | 13143278 |
| 3400183  | 3293653  | 102301.4 | 8678.33  | 43503.09 | 748519.7 | 4214486  | 7929239  | 755219.6 | 1226362  |
| 248129.7 | 197005.1 | 8060.554 | 3279.572 | 24565.02 | 45542.48 | 375075.4 | 266270.1 | 481673.8 | 388072.1 |
| 3462800  | 3924989  | 9249154  | 5310083  | 23196841 | 1708801  | 7002085  | 10069134 | 0        | 2831424  |
| 8481458  | 1062747  | 5344584  | 6047168  | 6631910  | 10151457 | 7476003  | 8855216  | 7667412  | 8428272  |
| 183656.6 | 193468.8 | 63468.77 | 75896.39 | 57101.27 | 45066.1  | 23007.89 | 127110.5 | 19395.3  | 35026.06 |
| 29110373 | 6730341  | 22610534 | 25580426 | 27412265 | 17098068 | 27730059 | 38612994 | 22204372 | 23340288 |
| 183305.8 | 113880.6 | 6780.624 | 12079.8  | 44145.73 | 204567.6 | 187277.7 | 306174.6 | 37508.43 | 90617.85 |
| 2572658  | 2389633  | 53392.36 | 41853.49 | 108644   | 448293.2 | 3421041  | 4853404  | 497673.2 | 1684770  |
| 1069878  | 642631   | 156155.1 | 132014.4 | 227800.2 | 975843.8 | 1276704  | 1779495  | 373549   | 404751.3 |
| 210361.5 | 161818.1 | 294008.7 | 614854.1 | 942444.4 | 114918   | 262299.2 | 461908.6 | 29712.86 | 228893.6 |
| 171116.9 | 126975.9 | 11606.51 | 27949.89 | 23201.1  | 208867.6 | 109477.8 | 285808.2 | 5780.419 | 64189.76 |
| 548672.2 | 747653.1 | 65991.51 | 68194.06 | 44469.83 | 33677.43 | 10114.4  | 29820.48 | 1747514  | 816260.5 |



|          |          |          |          |          |          |          |          |          |          |
|----------|----------|----------|----------|----------|----------|----------|----------|----------|----------|
| 3845047  | 3945586  | 167988.5 | 220827.2 | 444788.9 | 2217841  | 2670483  | 2028712  | 351257.5 | 1538525  |
| 2114534  | 1819076  | 308379.9 | 85362.56 | 251398.9 | 623145.8 | 2674425  | 5151008  | 1042158  | 1327652  |
| 14469.34 | 8046.84  | 26278.39 | 14360.22 | 93599.69 | 397583.8 | 72531.83 | 22182.44 | 6526.786 | 11543.03 |
| 131771.6 | 100530.2 | 120140.2 | 81837.52 | 278899.5 | 1128741  | 501264.3 | 243306.4 | 0        | 64847.31 |
| 260001.4 | 165629.2 | 4216.031 | 0        | 5766.724 | 0        | 468817.1 | 287629.9 | 42905.32 | 150699.6 |
| 1385074  | 746962.1 | 473963.5 | 184607.6 | 782230.2 | 455467.5 | 1922951  | 1841951  | 265051.5 | 963705.2 |
| 576695.1 | 357249.9 | 151813.8 | 214076.7 | 177211   | 544003.1 | 517550.9 | 465945.3 | 238265.6 | 269301.6 |
| 448440.6 | 391487.1 | 45111.23 | 28113.99 | 209861.3 | 118327.7 | 469047.1 | 1022062  | 0        | 214845.5 |
| 5758405  | 4323314  | 405594.7 | 271241.1 | 998268.8 | 5811542  | 5328881  | 4609029  | 1305479  | 2262321  |
| 7569662  | 9900855  | 734380.4 | 596291.1 | 2482871  | 527538.3 | 230422.5 | 24372164 | 0        | 4903557  |
| 18697.84 | 20748.87 | 74547.14 | 50219.46 | 102918.9 | 849474.7 | 155987.7 | 43453.41 | 37865.44 | 0        |
| 221823.6 | 202948   | 0        | 0        | 2865.431 | 5332.745 | 328122.9 | 501442.7 | 197425.9 | 343107.5 |
| 387641.7 | 336890.6 | 79750.79 | 9308.37  | 76175.66 | 226518   | 373386.3 | 911107.4 | 55858.19 | 128256.7 |
| 1739569  | 1794396  | 27924.89 | 4583.083 | 257614.1 | 556532.2 | 1666707  | 1571107  | 417932.7 | 4759880  |
| 9499209  | 14161685 | 0        | 0        | 0        | 0        | 0        | 34502134 | 0        | 2488762  |
| 762182.7 | 825033   | 16601.67 | 5403.783 | 342402.7 | 265926.5 | 395919   | 2045793  | 38651.46 | 62088.98 |
| 34749.9  | 51782.94 | 157025.7 | 397950.3 | 638004.5 | 2980702  | 64914.21 | 0        | 0        | 23235.47 |
| 178559.1 | 168399.8 | 3110.547 | 21481.84 | 0        | 80006.9  | 195350.8 | 422406.4 | 39141.74 | 78321    |
| 96637.39 | 27579.7  | 138766.8 | 177181.8 | 67287.48 | 102657.8 | 159833.9 | 106880.2 | 92518.26 | 65732.37 |
| 208513.2 | 178062.4 | 62130.96 | 118543.1 | 102501.6 | 131191.2 | 26585.44 | 396008.1 | 28007.04 | 47334.27 |
| 5168212  | 3130133  | 726096.9 | 124523   | 1483843  | 2622697  | 7620919  | 8207238  | 800185.9 | 3017195  |
| 626486.4 | 331769.4 | 1050223  | 1703360  | 401298.3 | 1744407  | 497640.6 | 1029427  | 268016.2 | 299045.1 |
| 2313083  | 2767765  | 8639.626 | 22761.7  | 56997.04 | 92344.78 | 1970948  | 1396730  | 147421.6 | 2368164  |
| 513769.7 | 676943.2 | 76637.81 | 71213.44 | 89107.78 | 14130.55 | 52116.38 | 133101.2 | 1661747  | 598413.1 |
| 215035.9 | 131906.1 | 42863.05 | 51935.99 | 62761.81 | 258782.2 | 160597.3 | 353211.8 | 112031.8 | 79709.79 |
| 584843.6 | 83549.57 | 409957.7 | 577889.5 | 222528.1 | 631679.8 | 510102.9 | 662887.7 | 496190.8 | 495890.9 |
| 1398512  | 1037128  | 763835.9 | 578890.8 | 457274.2 | 1051988  | 647321.9 | 3046774  | 927789.6 | 261831.9 |
| 54736.1  | 31960.99 | 57753.39 | 196201   | 107623.4 | 53202.44 | 70506.2  | 93628.41 | 34907.73 | 81342.46 |
| 281501   | 203746.2 | 45058.8  | 17938.14 | 130061.9 | 320098.2 | 158286.6 | 410855.2 | 15157.37 | 166855.2 |
| 339778.5 | 214914.5 | 761202.7 | 453973.4 | 2877418  | 96110.86 | 1151626  | 700342.6 | 138403.5 | 329531.4 |
| 87239706 | 55028423 | 19455622 | 22402197 | 33461469 | 62897627 | 98052296 | 1.14E+08 | 17387365 | 45441778 |
| 145763   | 100393.5 | 28324.17 | 53131.64 | 47530.22 | 109723.8 | 139425.7 | 84070.83 | 35045.49 | 119227.5 |
| 8752477  | 13031237 | 21905.7  | 30393.48 | 71388.14 | 24668.29 | 76059.95 | 32445.15 | 30248908 | 12063460 |
| 239744.2 | 47161.91 | 144856.4 | 504207.9 | 653529.5 | 369062.8 | 222250.4 | 203712   | 259937.5 | 281122.2 |
| 606707   | 378882.9 | 210379.7 | 307381.3 | 249779.4 | 586139.7 | 377419.7 | 787559.5 | 151192.1 | 302796.2 |
| 1622572  | 1761093  | 5813673  | 3245466  | 7663410  | 458533.1 | 1652941  | 4685189  | 153114.6 | 1121291  |
| 1144650  | 1322412  | 67861.77 | 42348.18 | 545911.4 | 190030.1 | 443420.4 | 3225086  | 98572.46 | 61280.05 |
| 196690.4 | 146005.2 | 58024.73 | 74879.08 | 81245.64 | 107154.1 | 167686.2 | 364881.4 | 58909.89 | 55771.36 |
| 40724697 | 58067508 | 492178   | 1703584  | 3156630  | 2559859  | 1834988  | 1.39E+08 | 437893.9 | 857891.8 |
| 637073.5 | 425938.7 | 345091.9 | 419280.6 | 370157.7 | 423718.1 | 195119.1 | 1205793  | 262515.3 | 193546   |
| 47909.38 | 51383    | 91121.9  | 51745.58 | 213769.5 | 763786.7 | 109736.4 | 58982.42 | 4270.95  | 12074.49 |
| 3549620  | 3742820  | 2535.741 | 2705.897 | 645102.5 | 2895487  | 1480928  | 9358546  | 103385.1 | 374116.9 |
| 669576.6 | 975278.2 | 4142.82  | 10707.42 | 14497.28 | 42999.96 | 21298.22 | 216978.7 | 33576.26 | 582274.2 |
| 1030466  | 1044163  | 12082.44 | 2791.997 | 20683.73 | 622488.8 | 901802.8 | 2707205  | 22631.79 | 341812.1 |
| 44219.2  | 38838.4  | 22172.3  | 18354.94 | 172871.9 | 646121   | 219958.2 | 80198.55 | 25338.82 | 25688.72 |
| 1952926  | 804720.3 | 822192.9 | 748808.9 | 951586.6 | 2029772  | 2036947  | 2988961  | 740327.6 | 1899808  |
| 2051009  | 2468087  | 3397.282 | 20228.4  | 19936.29 | 67162.76 | 1777180  | 1086048  | 40438.76 | 1889060  |

|          |          |          |          |          |          |          |          |          |          |
|----------|----------|----------|----------|----------|----------|----------|----------|----------|----------|
| 1209050  | 80456.06 | 409619.7 | 245121.8 | 676457.6 | 1453673  | 1393380  | 1150570  | 1270258  | 1141365  |
| 1585118  | 924896.9 | 428805.1 | 232378.2 | 1961125  | 153724.2 | 1410357  | 1483645  | 406269.7 | 1429349  |
| 6900299  | 10300310 | 43802.33 | 27968.63 | 36855.3  | 15250.05 | 62076.49 | 471470.9 | 24363676 | 8208221  |
| 510083.9 | 592565.8 | 0        | 3158.841 | 0        | 142432.5 | 403048.1 | 1479527  | 8942.16  | 53411.61 |
| 685748.1 | 675004.1 | 22252.48 | 7674.608 | 67367.68 | 487249.6 | 532582.6 | 329888.7 | 54275.06 | 302941.5 |
| 4018657  | 2381640  | 1294531  | 1266602  | 3055870  | 2973483  | 3296355  | 6942945  | 332423.4 | 3825453  |
| 48723.56 | 69971.63 | 157679.9 | 1030239  | 315898.7 | 66746.88 | 42067.15 | 11327.34 | 48226.53 | 169685.6 |
| 150987.6 | 195817.2 | 191268.2 | 66255.01 | 312237.1 | 775486.5 | 436068.4 | 167085.3 | 18660.17 | 17142.93 |
| 278946.8 | 345788.1 | 30327.69 | 0        | 82748.46 | 37511.21 | 92964.28 | 721946.9 | 4326.978 | 17541.07 |
| 19509838 | 16853479 | 5155086  | 3281599  | 7166879  | 4008457  | 20069432 | 43921910 | 433139.1 | 12505431 |
| 18291569 | 21169294 | 729876.4 | 636017.4 | 1377939  | 1235392  | 15939786 | 53820238 | 45180.45 | 7145094  |
| 7184813  | 4441242  | 2990.634 | 0        | 66428.09 | 21297.03 | 13239556 | 11364431 | 843616.9 | 4289348  |
| 5057454  | 2876365  | 37188.06 | 14418.95 | 167930.3 | 2160376  | 8612841  | 8062699  | 948514.6 | 3504150  |
| 782488.8 | 812800.6 | 69370.42 | 47793.41 | 583560.8 | 394003   | 78703.41 | 573276.5 | 374425.4 | 2221457  |
| 584724   | 651616.9 | 10726.07 | 8153.267 | 52339.65 | 334438.6 | 331262.3 | 284636.7 | 21424.81 | 180028.9 |
| 1954483  | 2489304  | 107568.3 | 42640.35 | 114208.4 | 479867.7 | 749029   | 691726.6 | 342308.3 | 489312.8 |
| 206736   | 108024.3 | 59451.7  | 35526.01 | 78769.83 | 76478.27 | 310695.7 | 309032.5 | 41433.74 | 159996.7 |
| 12258.27 | 14948.61 | 50712.76 | 450407   | 152979.8 | 23244.26 | 0        | 7117.958 | 5241.409 | 38064.94 |
| 233363.3 | 197239   | 102473.8 | 70013.79 | 109200.6 | 147563.9 | 81132.9  | 235051.6 | 68622.17 | 47658.26 |
| 73782.75 | 18937.18 | 634526.4 | 1516480  | 90579.96 | 107421.1 | 82644.7  | 76572.37 | 104225.4 | 66432.21 |
| 999106.3 | 687894.4 | 429038.6 | 506517.4 | 661131   | 13039989 | 14829516 | 2214351  | 740957.9 | 515528.1 |
| 5855399  | 5495141  | 226876   | 48226.87 | 2048958  | 4230708  | 4044588  | 11684733 | 511790.6 | 694909.6 |
| 3606520  | 1466803  | 401317.8 | 218171.2 | 621077.7 | 6013835  | 2006988  | 3402556  | 2138030  | 2577948  |
| 673916   | 626268.4 | 17952.36 | 53794.71 | 171785.7 | 495336.8 | 499528.3 | 348716.3 | 237363   | 1225166  |
| 10244061 | 11592857 | 76040.32 | 124434.3 | 2393066  | 4466430  | 5478428  | 26940281 | 495390.4 | 1670245  |
| 902067.9 | 377661.6 | 2560.769 | 0        | 5995.276 | 0        | 1763862  | 1535371  | 525969.4 | 796326.8 |
| 1061294  | 1533381  | 0        | 2268.887 | 7405.603 | 25035.94 | 192566.9 | 92448.81 | 3600731  | 1430441  |
| 682027.2 | 990534.1 | 17180.18 | 23298.01 | 31516.07 | 9387.848 | 49229.26 | 75012.7  | 2381578  | 741900.4 |
| 1185829  | 945664.9 | 29553.3  | 50027.74 | 125475.9 | 229901   | 1803943  | 1630906  | 174021.6 | 609007.3 |
| 2157423  | 3177506  | 56426.06 | 128895.4 | 51404.76 | 12513.75 | 20694.56 | 38887.77 | 7506242  | 2662124  |
| 2929263  | 3898872  | 0        | 0        | 61501.77 | 439467.9 | 1209406  | 9429576  | 0        | 364026   |
| 1330909  | 1379499  | 198281.8 | 36995.01 | 55919.57 | 342947.7 | 1322870  | 1105663  | 189848.5 | 501064.3 |
| 1929788  | 2748811  | 152161.3 | 143992.1 | 143546.5 | 69041.31 | 43324.13 | 29423.51 | 6484038  | 2560494  |
| 15062742 | 21555727 | 76920.05 | 112929.6 | 154270.5 | 889691.7 | 2737426  | 51402944 | 10094.86 | 4783359  |
| 1839790  | 2288696  | 84303.58 | 23381.44 | 68935.65 | 59505.18 | 1320860  | 1203329  | 5617337  | 2203765  |
| 3844200  | 2780745  | 507719.8 | 182475.6 | 1189582  | 1551030  | 5271161  | 7495438  | 1200520  | 1280693  |
| 3012976  | 4533913  | 3040.874 | 7213.763 | 9288.563 | 18488.57 | 37454.73 | 8218.129 | 10544940 | 4027842  |
| 460009.7 | 427339.9 | 57686.89 | 9389.164 | 134392.5 | 50250.36 | 549806.7 | 1146514  | 47927.9  | 161825.9 |
| 3582926  | 3361996  | 163560.5 | 131002.3 | 477137   | 2328226  | 3287017  | 2091700  | 324282.8 | 1576449  |
| 115799.8 | 93152.93 | 16957.65 | 14162.44 | 12865.1  | 143724   | 56445.23 | 228717.4 | 18179.4  | 26837.87 |
| 1586039  | 1861854  | 292484.4 | 423191.3 | 379993.2 | 583944.7 | 91468.06 | 1716560  | 350764.5 | 901306.2 |
| 11227981 | 10630618 | 1456114  | 979705.5 | 3480202  | 2066258  | 11797103 | 26766256 | 268475.7 | 2925238  |
| 961552.9 | 821565.4 | 220759.7 | 232255   | 240791.2 | 620730.9 | 737862.1 | 2374695  | 663767.5 | 514344.8 |
| 4871476  | 5179713  | 450235.8 | 494171.6 | 655731.3 | 2034853  | 3446418  | 1631845  | 942089.3 | 1475547  |
| 424396.3 | 548100.4 | 114607.1 | 85554.87 | 40364.05 | 39936.82 | 32124.12 | 17042.23 | 1264424  | 702066.4 |
| 4089831  | 2498846  | 73224.45 | 43629.82 | 319137.9 | 2324671  | 6464947  | 6014736  | 582777.1 | 2465382  |
| 559948.7 | 583463.9 | 3011.288 | 0        | 25901.82 | 14513.95 | 707061.7 | 1269848  | 0        | 89227.64 |

|          |          |          |          |          |          |          |          |          |          |
|----------|----------|----------|----------|----------|----------|----------|----------|----------|----------|
| 666909.5 | 843515.5 | 159797.2 | 134512.6 | 109524.3 | 80730.61 | 69079.85 | 38974.38 | 1917128  | 1168025  |
| 4804892  | 5776575  | 180414.4 | 173445.9 | 173952.8 | 486721.8 | 3741958  | 13186894 | 289997.3 | 342904.4 |
| 1472044  | 1832837  | 20904.52 | 0        | 13350    | 176518.2 | 1052529  | 4510480  | 6060.671 | 211512.5 |
| 668637.9 | 364010.7 | 437984.3 | 494163.6 | 492749   | 481652.1 | 214512.9 | 924761.9 | 341482.4 | 205350.4 |
| 294695.1 | 195419.4 | 139144.2 | 324953.6 | 899662.9 | 414392.1 | 1163276  | 312828.4 | 69380.42 | 235738.3 |
| 1287290  | 698833.9 | 472883.8 | 481852.2 | 445757.3 | 1239789  | 1276111  | 2360240  | 635201.6 | 705514.6 |
| 169831.8 | 152361   | 19717.73 | 5400.727 | 10958.64 | 16521.78 | 238680.2 | 163497.7 | 16046.66 | 122681.5 |
| 3889335  | 5557969  | 338513.2 | 323498.1 | 308990.6 | 91987.72 | 84319.61 | 10829.11 | 13023979 | 5355907  |
| 239653.6 | 190827   | 147108.9 | 150659.5 | 103572.8 | 90238.61 | 75677.21 | 211316.5 | 18080.22 | 138607.4 |
| 9491.26  | 10548.39 | 56780.65 | 7675.746 | 67845.35 | 327674.2 | 21316.38 | 6003.477 | 0        | 0        |
| 1057330  | 802916   | 97554.74 | 269786.1 | 254156.4 | 644936.7 | 1192845  | 2389597  | 260082.2 | 861433.4 |
| 2026442  | 2450672  | 54819.33 | 27927.31 | 214935.6 | 197042.5 | 1489515  | 6293718  | 0        | 1428001  |
| 618562.5 | 344761.7 | 237582.8 | 416513.3 | 376893.3 | 427995.2 | 486284   | 892763.1 | 325131.2 | 598787.2 |
| 2772071  | 2496687  | 882762.8 | 163744.3 | 541270.6 | 909787.9 | 2861884  | 6843285  | 642223.7 | 934961.5 |
| 727342.5 | 391781.6 | 9939.72  | 5493.12  | 1321443  | 78232.66 | 120213.3 | 740959.2 | 373878.5 | 555070.1 |
| 2773347  | 4138130  | 53459.12 | 39736.2  | 38672.41 | 56669.77 | 72261.67 | 1177532  | 30616.32 | 2162967  |
| 331730   | 216191.9 | 67897.44 | 22511.88 | 64476.68 | 469546.1 | 181769   | 485559.6 | 192353   | 93521.43 |
| 3838336  | 2680454  | 31510.6  | 50747.38 | 75753.87 | 3986633  | 4438069  | 6939669  | 411560.5 | 1736082  |
| 69027.62 | 39140.02 | 87833.29 | 64759.54 | 122872.4 | 131404.4 | 84196.78 | 82273.8  | 72399.89 | 44375.35 |
| 1576917  | 574050.7 | 1022051  | 3045587  | 3605974  | 2476716  | 1484422  | 984169.5 | 1632426  | 2342172  |
| 2229354  | 3328657  | 64105.26 | 60047.65 | 63412.63 | 10881.61 | 16408.32 | 15662.47 | 7759039  | 2974018  |
| 1554984  | 2305911  | 12018.36 | 54962.51 | 42953.33 | 5302.854 | 86849.05 | 25586.25 | 5348259  | 2170428  |
| 559712.6 | 396222.1 | 142495.9 | 50792.29 | 240078.7 | 163934.5 | 740140   | 970875.4 | 78801.67 | 212408   |
| 41403.17 | 53154.54 | 34292.62 | 22371.44 | 170668.8 | 542529.6 | 139084.8 | 48436.24 | 5460.186 | 0        |
| 626768.6 | 685066.8 | 93872.52 | 18551.7  | 51621.47 | 92488.59 | 581035.5 | 1822011  | 314079   | 89023.74 |
| 208932.8 | 133571.1 | 38317.55 | 55926.92 | 217295.8 | 86022.71 | 173470.9 | 90408.74 | 178237   | 437706.1 |
| 908106.6 | 224700.8 | 3482073  | 5411316  | 1346373  | 609231.8 | 605429.7 | 722440.3 | 1085161  | 1178239  |
| 71693.21 | 52896.62 | 15336.07 | 44409.42 | 52749.08 | 4567.81  | 60198.14 | 118245.5 | 11196.28 | 22837.55 |
| 2140050  | 4302335  | 4899506  | 80909952 | 39065841 | 2270.544 | 1103622  | 577607.7 | 8729.901 | 289349.6 |
| 2830181  | 489370.9 | 1613582  | 2292168  | 2076435  | 3400785  | 2292898  | 3066194  | 2156552  | 2548282  |
| 1772176  | 1438613  | 7192.196 | 13257.71 | 391141.1 | 344727.3 | 2630206  | 1925782  | 305833.4 | 783074.9 |
| 120655.8 | 102927.5 | 0        | 0        | 12783.89 | 77581.67 | 144277.7 | 85916.12 | 4424.458 | 132148.5 |
| 2266145  | 437766.4 | 1501251  | 1726630  | 1952555  | 2488850  | 1944548  | 2289924  | 1789100  | 1977598  |
| 641555.4 | 882803.7 | 3735.45  | 3987.377 | 21333.03 | 161310   | 122799.9 | 171445   | 78649.85 | 141863.4 |
| 569570.9 | 766392.8 | 6836.524 | 5785.655 | 26509.45 | 169684.3 | 125316.9 | 169588.9 | 88270.35 | 77875.19 |
| 1741807  | 2160005  | 228602.2 | 32621.02 | 664667.3 | 178296.8 | 516266.5 | 5192686  | 50181.04 | 131924.3 |
| 1.61E+08 | 2.64E+08 | 2.19E+08 | 2.11E+08 | 6.42E+08 | 1.76E+08 | 6.24E+08 | 6.1E+08  | 3298916  | 329397.4 |
| 581904.1 | 732887.2 | 30274.54 | 16592.6  | 215015.4 | 53160.71 | 188810   | 1262790  | 16422.49 | 15860.15 |
| 458596.3 | 141735.6 | 3096677  | 5963038  | 323904.6 | 543562.8 | 433920.7 | 262958   | 545895.6 | 634969.1 |
| 350562.9 | 505427.9 | 4774.039 | 4181.754 | 6011.401 | 0        | 81901.74 | 1234367  | 38353.75 | 210117.9 |
| 1087931  | 1625681  | 2944.565 | 17153.06 | 27613.57 | 10426.33 | 60185.95 | 25485.31 | 3798834  | 1427418  |
| 1549986  | 354221.4 | 924573.1 | 1635469  | 2402253  | 2748783  | 4473357  | 2003575  | 1280365  | 1688107  |
| 416229.8 | 355040.7 | 106525.8 | 107689.6 | 38656.7  | 26829.37 | 537957.6 | 268094.7 | 16644.32 | 369603.8 |
| 301350.8 | 276761.4 | 101654.7 | 99835.02 | 54966.5  | 80883.88 | 251876.1 | 767005.4 | 45309.14 | 213255.5 |
| 3014629  | 4458634  | 16741.86 | 6954.11  | 133190   | 50808.3  | 276612.4 | 131607.7 | 10337138 | 4244458  |
| 54787640 | 62756857 | 790234.1 | 839557.2 | 15432617 | 22943511 | 27417310 | 1.52E+08 | 2666152  | 13438123 |
| 162313.1 | 123529   | 439298.8 | 453782.4 | 402635.6 | 39213.71 | 159399   | 97005.49 | 346669.3 | 34596.66 |

|          |          |          |          |          |          |          |          |          |          |
|----------|----------|----------|----------|----------|----------|----------|----------|----------|----------|
| 665110   | 970274.5 | 38119.13 | 38025.39 | 31725.36 | 24796.01 | 18847.99 | 0        | 2251456  | 948748.4 |
| 1647859  | 1421480  | 179336.3 | 33954.46 | 635435.6 | 1075731  | 1489788  | 3003013  | 115822.4 | 277889.7 |
| 724466   | 703396.5 | 10519.81 | 23859.52 | 27168.21 | 116323.9 | 956330.8 | 1472653  | 6145.841 | 134440.9 |
| 554854.8 | 319732.7 | 4761.369 | 3470.322 | 27335.43 | 552833.7 | 749738.7 | 723912.3 | 77817.04 | 426057.7 |
| 135770.5 | 90670.47 | 161679.1 | 244733.3 | 234479.1 | 404155.4 | 83819.77 | 74848.91 | 132320.7 | 270096   |
| 34271925 | 50870204 | 2952623  | 1406929  | 50388.9  | 200738.6 | 485857.5 | 1.23E+08 | 23918620 | 260589.2 |
| 257520.4 | 187341.4 | 7585.842 | 0        | 57429.3  | 216318.3 | 306616.5 | 249494.2 | 0        | 259477.9 |
| 1473203  | 1841772  | 372265.9 | 371489.7 | 379820.5 | 174444.9 | 48195.85 | 20579.14 | 4238677  | 2481359  |
| 341354.6 | 509720.8 | 11593.53 | 3116.598 | 7602.623 | 0        | 20115.51 | 0        | 1185478  | 463474   |
| 1276519  | 1171185  | 152383.9 | 50344.65 | 217672   | 1229810  | 764747.4 | 2907215  | 38982.17 | 236805.2 |
| 2436535  | 3668099  | 1874809  | 1023620  | 108164.3 | 44916680 | 35556681 | 1212921  | 1634580  | 8902866  |
| 2937554  | 2730638  | 1522883  | 1574022  | 511122.3 | 1232795  | 899487.3 | 7719145  | 2112633  | 784505.6 |
| 258443.1 | 178779.7 | 293699.1 | 1428798  | 770742.2 | 195221   | 316939.6 | 191817.8 | 191295   | 572159   |
| 4763630  | 4566623  | 41662.49 | 0        | 216086.8 | 993239.4 | 6358121  | 9702335  | 247183.6 | 1521705  |
| 3402945  | 2058314  | 24323.86 | 8839.204 | 43614.36 | 1018955  | 5988946  | 5877484  | 691898.5 | 2311413  |
| 277691.2 | 306398.8 | 88603.28 | 126464.9 | 102916.3 | 51447.21 | 16581.14 | 190586   | 23229.32 | 26445.62 |
| 4188390  | 3168333  | 3799646  | 7287806  | 10178738 | 3206000  | 21036926 | 8866013  | 4372489  | 23781.96 |
| 816066.2 | 1087651  | 86694.21 | 132383.5 | 107510   | 135965.1 | 70297.44 | 2673639  | 108869.6 | 144115.9 |
| 15959216 | 23927704 | 67010.53 | 128116.5 | 64166.02 | 561597.5 | 941507.4 | 6706255  | 2231941  | 5906838  |
| 8163718  | 6866398  | 436079.2 | 419062.2 | 1132022  | 7785021  | 7109402  | 6428583  | 849891.7 | 2976487  |
| 1290465  | 1803285  | 146649.3 | 145815   | 151891.3 | 61012.4  | 67215.49 | 41642.28 | 4214468  | 1865092  |
| 3360293  | 4928865  | 154806   | 136910.4 | 163542.3 | 39875.45 | 239561   | 53709.35 | 11403741 | 4836819  |
| 312121   | 227976.3 | 113915.2 | 315359   | 977036   | 611456.7 | 818690.9 | 244512.2 | 44796.65 | 495537.8 |
| 8649010  | 12934480 | 31434.03 | 19286.59 | 27179.6  | 502476.7 | 513824.4 | 3721229  | 1112803  | 3284786  |
| 2874320  | 495960.7 | 599040.6 | 329956   | 627444.1 | 2596621  | 4408718  | 3461666  | 2258888  | 2832357  |
| 6958623  | 10318622 | 266661.8 | 306932.3 | 312813.1 | 177679.5 | 116163.3 | 18953.42 | 24351726 | 8467243  |
| 312067.1 | 211048.6 | 63729.86 | 37302.55 | 76511.88 | 229706.3 | 380255   | 330815.8 | 88961.25 | 355637   |
| 438158.2 | 321735.3 | 538463.1 | 1940339  | 1198795  | 451461.6 | 356315.2 | 206492.7 | 444290.4 | 954521   |
| 1028501  | 597767.8 | 0        | 9526.378 | 52527.71 | 175098.8 | 1871760  | 1287241  | 163042.8 | 1100247  |
| 98623.6  | 32793.17 | 97410.06 | 92276.92 | 174457.9 | 823022.8 | 302586.7 | 122927   | 41695.92 | 100728.6 |
| 5420120  | 3422727  | 1891470  | 570932.5 | 3039015  | 1713537  | 7107455  | 7828211  | 1095138  | 2335736  |
| 1385240  | 1304713  | 166837.1 | 33760.72 | 285987   | 299824.8 | 1649282  | 3463476  | 278565.4 | 266841.3 |
| 7954268  | 5102324  | 43791.89 | 10210.77 | 315623   | 1126676  | 14231488 | 11189907 | 743095.3 | 4391067  |
| 340710.6 | 499422.2 | 9070.259 | 7483.354 | 2319.821 | 17309.3  | 42191.36 | 84409.58 | 20805.06 | 256929.3 |
| 665933.4 | 564930.2 | 6405674  | 1386554  | 2909684  | 118999.5 | 745960.3 | 1648596  | 642512.4 | 370202.8 |
| 716512.7 | 382245.3 | 5537.469 | 17780.24 | 63322.08 | 295937.2 | 1244411  | 1002469  | 46590.03 | 837915.9 |
| 420146.8 | 287410.8 | 187246.8 | 552758.4 | 865898.3 | 2425780  | 905917   | 286950.3 | 209524.9 | 299534.3 |
| 4016186  | 4034326  | 119001.2 | 62665    | 479685.6 | 1279903  | 4440013  | 8532028  | 41104.28 | 1343574  |
| 1438528  | 1289970  | 26961.15 | 13484.55 | 173725.9 | 341923.5 | 1991126  | 1928683  | 68959.91 | 592580.5 |
| 564021.4 | 432463.4 | 54289.08 | 89213.23 | 100091.9 | 432702.5 | 621077.3 | 368505   | 112232.5 | 285922.8 |
| 621488.3 | 693317.9 | 12899.7  | 10850.67 | 7687.679 | 42047.14 | 691943.8 | 1717933  | 138907.7 | 346497.7 |
| 645081.2 | 363209.7 | 69122.44 | 7842.263 | 96381.46 | 1100693  | 211053.5 | 1168170  | 215211.4 | 462771.3 |
| 1145531  | 1215828  | 2938050  | 2611464  | 4022448  | 38651488 | 7810679  | 474970.7 | 3260377  | 272659.5 |
| 109901.1 | 111824.6 | 6636.747 | 16360.98 | 15557.81 | 110949.7 | 26478.25 | 140208.3 | 10311.5  | 6741.668 |
| 93205.65 | 47063.92 | 171167.1 | 140595.5 | 354801   | 1969249  | 343223.1 | 158607.1 | 93417.14 | 46119.2  |
| 106465.4 | 51265.17 | 231898.4 | 65375.92 | 116758.9 | 531161.4 | 185830   | 68738.1  | 132989.1 | 92244.58 |
| 230836.2 | 318945.7 | 2511.309 | 5734.565 | 7097.561 | 0        | 101183.5 | 777325.1 | 0        | 5187.129 |

|          |          |          |          |          |          |          |          |          |          |
|----------|----------|----------|----------|----------|----------|----------|----------|----------|----------|
| 607290.4 | 262721.4 | 8396.659 | 0        | 0        | 16979.85 | 1193654  | 811686.1 | 178391.3 | 548757.3 |
| 4230628  | 2220065  | 1229417  | 1276739  | 1339009  | 3166908  | 5501316  | 7261548  | 2084084  | 1993350  |
| 625209.9 | 900923.1 | 32747.76 | 37795.11 | 41870.43 | 71247.45 | 19275.37 | 13114.66 | 2116367  | 841043.9 |
| 127316.5 | 113513   | 23896.35 | 9081.529 | 91169.82 | 119957.1 | 7705.346 | 224030.3 | 12071.77 | 0        |
| 1061842  | 661508.7 | 727086.7 | 776928.5 | 542551.2 | 617395.8 | 488440.4 | 742322.1 | 526730.1 | 525244.5 |
| 3360412  | 3564813  | 842597.5 | 271904.6 | 544131.4 | 1162699  | 2326577  | 3152319  | 466069.8 | 1938987  |
| 493626   | 47234.88 | 140242.5 | 213256.3 | 55382.83 | 722005.8 | 455050.5 | 431030.2 | 459504.8 | 515631.8 |
| 12385703 | 7590433  | 52809.3  | 34845.08 | 323390.9 | 3066458  | 22048733 | 18509590 | 1242792  | 8060028  |
| 647540.4 | 679512   | 479824.3 | 145977.3 | 1262036  | 2811046  | 3895468  | 449560.7 | 255642.4 | 638129.8 |
| 1006723  | 1313940  | 8815.441 | 6188.423 | 16301.29 | 72154.59 | 644345.1 | 1514215  | 19589.09 | 311625.6 |
| 535422.5 | 158871.2 | 460892.8 | 655507.2 | 1558485  | 450711.9 | 1155929  | 446178.7 | 610423.4 | 771702.4 |
| 333889.7 | 196698   | 178531.3 | 238950.6 | 179698.7 | 265968.3 | 164010.3 | 393512.2 | 279814.1 | 43990.79 |
| 9210609  | 14191388 | 2607.801 | 0        | 3477.575 | 0        | 94380.26 | 278630.3 | 34035588 | 7517469  |
| 983326.1 | 1212412  | 0        | 2858.991 | 24349.79 | 239754.4 | 685537.4 | 3082757  | 6623.898 | 359187.5 |
| 410371.4 | 275645.4 | 16030.81 | 18414.52 | 206885.1 | 305876.6 | 486271.7 | 730470   | 43428.03 | 221592.8 |
| 21949.91 | 22072.74 | 59109.29 | 460152.7 | 181828   | 23663.15 | 0        | 12815    | 10285.55 | 60514.35 |
| 142685.5 | 151021.8 | 0        | 10400.67 | 3421.137 | 14621.67 | 170482.3 | 344095.7 | 18595.25 | 26903.53 |
| 673874   | 489076.6 | 72246.39 | 200166.1 | 519286   | 456112.3 | 485373.4 | 1314239  | 304960.8 | 402452.6 |
| 2642969  | 691730.6 | 1634449  | 2610807  | 2195116  | 1837150  | 2496241  | 3176454  | 1980494  | 1858148  |
| 3458825  | 3134554  | 190872.4 | 165951   | 464957.9 | 3079389  | 2769227  | 2538203  | 314551.5 | 1014915  |
| 325061.7 | 339608.7 | 26089.12 | 56743.99 | 60330.3  | 144059.7 | 228633.2 | 140580.9 | 16124.21 | 85550.91 |
| 1636593  | 1134740  | 170529.3 | 51863.58 | 923939.7 | 206361.3 | 2383778  | 2022571  | 220037.4 | 653260   |
| 478975.6 | 381992.4 | 14242.48 | 20882.98 | 24961.97 | 113829.7 | 745905.4 | 578472.1 | 53123.54 | 169369.6 |
| 6498441  | 10012679 | 20160.67 | 4956.816 | 13504.27 | 26974.51 | 62134.54 | 45646.4  | 23547039 | 7471208  |
| 873773.8 | 291095.5 | 156246.8 | 75373    | 381315   | 1138481  | 937122.9 | 399818.4 | 1113425  | 877828.3 |
| 3587977  | 1863557  | 5751637  | 8952653  | 2392687  | 9344150  | 2876457  | 5669360  | 1577699  | 1646643  |
| 38693480 | 3426473  | 22032819 | 34470948 | 27759002 | 44880412 | 35569382 | 37928793 | 35974716 | 36810099 |
| 5056751  | 2730381  | 593347.1 | 2849040  | 1996692  | 1751583  | 7109545  | 8313681  | 3730026  | 1300658  |
| 334802.6 | 216188   | 0        | 0        | 12502.95 | 8524.471 | 616602.2 | 537915   | 30426.7  | 207313.2 |
| 906154.6 | 1242907  | 85896.41 | 101464.5 | 116963.5 | 144937   | 68555.91 | 20206.22 | 2917939  | 1312918  |
| 1991469  | 1329744  | 0        | 0        | 31295    | 149061.6 | 3612444  | 3509602  | 282672.8 | 1134682  |
| 564026.1 | 478193.9 | 10083.34 | 9997.026 | 118562.4 | 460025.3 | 567538   | 1182209  | 18448.86 | 199695.1 |
| 421012.8 | 291655   | 405525.4 | 259471.2 | 791620.1 | 3079421  | 1293498  | 617751.6 | 54067.85 | 264765.8 |
| 1925606  | 2927466  | 6556.455 | 8154.603 | 19000.18 | 29951.74 | 125229.4 | 51416.66 | 6799716  | 2558643  |
| 301741   | 203029.2 | 142548.1 | 220162.2 | 185470   | 174328   | 128385.7 | 261891.3 | 103630.5 | 119907.5 |
| 393523.9 | 230021.2 | 3182.253 | 9968.056 | 3789.229 | 64484.55 | 723442.1 | 634429   | 306910.7 | 464393.6 |
| 2982042  | 2053063  | 773957.1 | 186763.2 | 895471.1 | 742175.2 | 4407861  | 6228834  | 916670   | 1724211  |
| 2558103  | 3733810  | 216843.6 | 222666.8 | 183112.8 | 109471.9 | 29468.27 | 31910.35 | 8724935  | 3482235  |
| 3394802  | 3424203  | 126987.2 | 62333.51 | 187463.4 | 341231.1 | 4421049  | 8819648  | 1125855  | 1511647  |
| 79031.49 | 79929.88 | 164559.5 | 988774.7 | 373102.9 | 96393.94 | 33479.99 | 41139.19 | 58977.89 | 218164.7 |
| 18166781 | 16684742 | 3661861  | 847060.5 | 9570707  | 3313767  | 17868611 | 40378448 | 0        | 9833989  |
| 12700.18 | 14711.9  | 0        | 0        | 32484.37 | 184598.8 | 103815.7 | 29188.72 | 0        | 6395.337 |
| 3746577  | 3724383  | 13644.09 | 3605.891 | 104205.1 | 1731396  | 4235026  | 10082455 | 1153565  | 1939749  |
| 2753871  | 4280087  | 0        | 0        | 0        | 0        | 0        | 10353816 | 0        | 1015767  |
| 880385.2 | 618916.4 | 0        | 0        | 24432.6  | 481948.8 | 1368660  | 1269315  | 51890.19 | 523530.6 |
| 671169.4 | 1030558  | 7107.057 | 8587.529 | 2305.813 | 23584.77 | 0        | 9928.263 | 2387888  | 891036.2 |
| 260794   | 336575.7 | 6277.034 | 7042.382 | 70904.04 | 87146.98 | 48501.31 | 360992.8 | 0        | 116626.6 |

|          |          |          |          |          |          |          |          |          |          |
|----------|----------|----------|----------|----------|----------|----------|----------|----------|----------|
| 188535.8 | 229683.8 | 0        | 0        | 3868.108 | 32570.77 | 156363.3 | 336969.7 | 5590.042 | 73087.87 |
| 1427681  | 1194609  | 147281.6 | 195719   | 428331.5 | 1502441  | 836718.7 | 1473029  | 126741.9 | 365421.2 |
| 734285.5 | 873758.8 | 13932.83 | 11146.41 | 20091.15 | 37604.15 | 712523.7 | 295945.1 | 63415.39 | 1115406  |
| 394865.3 | 226659.7 | 6514.189 | 0        | 4561.702 | 145339   | 699197   | 692038.7 | 78821.47 | 338783.2 |
| 424288.2 | 344892.5 | 26985.7  | 5248.832 | 30028.57 | 63294.32 | 670745.2 | 788560.5 | 0        | 243927.2 |
| 4871846  | 2125235  | 73056.07 | 131785.7 | 80731.38 | 67829.18 | 9584676  | 8425841  | 2903185  | 4014494  |
| 1393517  | 319657.6 | 597294.8 | 1703628  | 2142899  | 2566783  | 4009548  | 1638548  | 1053437  | 1575820  |
| 3009836  | 586141.4 | 1612840  | 2192478  | 2181214  | 3497121  | 2821924  | 2929038  | 2304174  | 2635277  |
| 338459.8 | 204489.4 | 0        | 0        | 13298.69 | 0        | 638923.4 | 667465.5 | 111441   | 351437.8 |
| 3459977  | 4112174  | 161611.3 | 117770.8 | 264376.7 | 1588353  | 1870821  | 1383031  | 441686.8 | 1084962  |
| 20096475 | 13122781 | 70316.69 | 30629.24 | 298552.7 | 4133085  | 35790734 | 32822057 | 7435057  | 20898850 |
| 2.84E+08 | 2.93E+08 | 3303807  | 1984020  | 3384057  | 1.14E+08 | 3.12E+08 | 7.33E+08 | 4573161  | 2.01E+08 |
| 233316   | 175967.3 | 130542.5 | 76637.76 | 479928.1 | 1171981  | 863452.5 | 393105.4 | 20079.61 | 82496.08 |
| 865482.1 | 599076.8 | 161374.1 | 256091.2 | 291985.6 | 752208.3 | 825986.1 | 796788.8 | 206520.7 | 425507.5 |
| 7918207  | 6969762  | 456214.4 | 401946.9 | 1052240  | 7429265  | 6590879  | 6179150  | 666090.1 | 2534671  |
| 96304.82 | 88131.26 | 34922.94 | 28109.16 | 281721.1 | 1381233  | 561003.9 | 174938   | 5961.57  | 55009.33 |
| 980752.7 | 1222546  | 251936.6 | 266779.2 | 269771.8 | 122041.8 | 68985.63 | 0        | 2681999  | 1864718  |
| 1548245  | 2385898  | 2681.796 | 0        | 6190.212 | 12237.05 | 68483.31 | 35167.01 | 5555405  | 1968448  |
| 3101122  | 2804511  | 506790.1 | 304300.9 | 4521969  | 54349999 | 34212866 | 6910354  | 43951.82 | 750821.3 |
| 2944497  | 3748106  | 54561.63 | 42737.92 | 183401.3 | 1171441  | 1205991  | 1049223  | 368028.8 | 823402.5 |
| 2963325  | 4575084  | 10500.75 | 2242.446 | 55599.8  | 37383.92 | 43523.01 | 8201.306 | 10660151 | 3721381  |
| 36198980 | 29646818 | 12286862 | 7591456  | 21819671 | 6983871  | 34351640 | 76342836 | 1429171  | 24071982 |
| 36454.96 | 52660    | 16057.1  | 20659.89 | 56220.8  | 334095.5 | 222799.6 | 67419.54 | 0        | 0        |
| 164652.2 | 160808.4 | 0        | 3403.648 | 0        | 6311.348 | 239775.1 | 408768.7 | 4648.146 | 45080.17 |
| 2636430  | 3415446  | 12021.7  | 29869.47 | 206161   | 506342.3 | 1431592  | 8301132  | 0        | 547015.8 |
| 780284.7 | 1116647  | 75510.62 | 38826.14 | 114152.1 | 38363.19 | 56026.61 | 335573.6 | 75775.17 | 648832.3 |
| 1126968  | 964935.5 | 95477.29 | 77061.23 | 138071.1 | 1236837  | 780918.5 | 934889   | 136209   | 436049.9 |
| 617677.8 | 825050.7 | 141900   | 129296.8 | 98768.06 | 73591.85 | 0        | 7684.143 | 1895655  | 1004029  |
| 4138932  | 2294720  | 2540166  | 3188557  | 2936053  | 2819098  | 1792316  | 4322216  | 2018168  | 1625525  |
| 1442159  | 2897513  | 9214738  | 7808339  | 20901189 | 161458.4 | 97579551 | 221563.2 | 6624192  | 48884.15 |
| 330564.7 | 276701.2 | 0        | 0        | 108911.9 | 141695.3 | 425980.4 | 790327.8 | 63376.49 | 222719.6 |
| 2777578  | 2644639  | 99760.81 | 116983.3 | 325210.9 | 2466958  | 2062966  | 1895435  | 80072.53 | 918751.5 |
| 500839.7 | 381721.6 | 105326.1 | 90335.4  | 408202.6 | 33931773 | 78776809 | 199164.3 | 64292.1  | 522807.1 |
| 374603.5 | 205930.9 | 6667.92  | 4272.303 | 14534.62 | 0        | 718139.4 | 569736.7 | 54716.32 | 359905   |
| 1944814  | 1754582  | 52682.15 | 66298.46 | 236843.4 | 1671796  | 1759140  | 1380925  | 183647.8 | 633542.3 |
| 6071876  | 9453480  | 48077.29 | 38801.14 | 24068.97 | 0        | 8647.609 | 48716.76 | 22245609 | 6753177  |
| 53185827 | 81513315 | 535135.9 | 280451.2 | 973096.4 | 434294.2 | 2954782  | 1.95E+08 | 0        | 23984625 |
| 431524.7 | 368459.4 | 66050.53 | 56892.57 | 43750.34 | 527516.3 | 197150.2 | 1070373  | 238458   | 141335.4 |
| 508493.7 | 162939.7 | 18251.13 | 8912.551 | 84709.48 | 660170.2 | 637633   | 350117.2 | 408521.3 | 733660.4 |
| 15906793 | 19792942 | 169239.4 | 319737.6 | 4682954  | 1160046  | 9494939  | 33661582 | 0        | 41062232 |
| 532600.9 | 804508.1 | 2827.454 | 2138.76  | 3101.32  | 9676.05  | 72281.5  | 29832.57 | 1888273  | 659996.6 |
| 1656191  | 2590297  | 0        | 0        | 0        | 0        | 0        | 6194540  | 0        | 995791.9 |
| 362732.6 | 518919.7 | 21716.61 | 46005.78 | 55905.23 | 19257.43 | 11567.77 | 26012.58 | 1214894  | 505648.5 |
| 8390404  | 6612082  | 1542949  | 1623054  | 2124931  | 7744627  | 6804938  | 6727824  | 1634816  | 3231045  |
| 481625.4 | 396285.3 | 340493   | 469586.8 | 862357.2 | 3533613  | 1438725  | 859637.3 | 44103.26 | 164188.6 |
| 761370.2 | 1067289  | 18819.52 | 4630.647 | 35985.78 | 168918   | 167221.8 | 207239.7 | 122261.8 | 66498.09 |
| 523462.7 | 81309.46 | 408539.2 | 575055.3 | 462139.6 | 469874.9 | 375516.1 | 528818.5 | 429416   | 456376.5 |

|          |          |          |          |          |          |          |          |          |          |
|----------|----------|----------|----------|----------|----------|----------|----------|----------|----------|
| 1462163  | 2184651  | 76962.94 | 85228.12 | 58276.08 | 89581.33 | 25971.19 | 15904.79 | 5140836  | 1804869  |
| 398314.6 | 247520.9 | 79052.02 | 71275.24 | 137647.6 | 263509.7 | 523151.3 | 683852.8 | 54000.5  | 262580.1 |
| 5.3E+08  | 5.96E+08 | 4847662  | 1690266  | 10255703 | 95569143 | 5.69E+08 | 1.47E+09 | 63607.67 | 3.73E+08 |
| 5828744  | 4039153  | 15489.7  | 2482.36  | 64986.9  | 1172183  | 10241636 | 10012246 | 1969556  | 5774145  |
| 137823.9 | 114250   | 285967.5 | 375144.6 | 562332.6 | 2483184  | 102644.9 | 167150.4 | 68315.76 | 53945.44 |
| 6392554  | 4389361  | 1002208  | 345264.7 | 2553996  | 6582586  | 5959655  | 10965044 | 1362133  | 2197825  |
| 187225.7 | 241333.3 | 29059.88 | 82514.67 | 44998.63 | 8139.815 | 0        | 0        | 279451.4 | 570840.3 |
| 10863809 | 5811729  | 1764777  | 860602.9 | 2483826  | 14679182 | 9943535  | 18878921 | 5542201  | 4796578  |
| 11907544 | 18067164 | 313036.4 | 334918.8 | 335323.3 | 217691   | 775849   | 448336.4 | 42323320 | 14867701 |
| 1132244  | 1398202  | 85681.2  | 108528.8 | 151838.3 | 38811.55 | 786154.8 | 695270   | 3493346  | 1230208  |
| 3047606  | 4733364  | 9893.148 | 14428.77 | 26598.96 | 50987.09 | 63785.47 | 163664.1 | 11083210 | 3619164  |
| 23058.97 | 25507.51 | 4319.214 | 8871.799 | 48502.44 | 372933.4 | 183012.6 | 55000.78 | 0        | 7730.774 |
| 209636   | 111354.2 | 0        | 3160.852 | 15351.65 | 7088.009 | 401998.2 | 366081.6 | 52468.76 | 201605.9 |
| 547678.3 | 658956.5 | 139748.4 | 60167.49 | 279991.7 | 7710139  | 8225149  | 234255.1 | 635469   | 1659475  |
| 392454.3 | 342439.3 | 7432.407 | 6994.595 | 69579.31 | 348895.7 | 366407.6 | 226531.9 | 120029.1 | 92684.8  |
| 179044.5 | 186915.5 | 130774.6 | 204475.8 | 693868.2 | 2501398  | 486716.5 | 175059.8 | 8151.214 | 39993.73 |
| 1933460  | 347461.2 | 1066760  | 1833503  | 1665309  | 2063180  | 1552442  | 1928597  | 1734249  | 1593164  |
| 786764.2 | 472865.2 | 113607.3 | 60043.64 | 861907.7 | 503097.4 | 668653   | 1315085  | 362929.4 | 510190.2 |
| 1704618  | 1008456  | 2694.669 | 4091.885 | 125438.5 | 44096.33 | 3217651  | 2225762  | 286870.1 | 1017924  |
| 187001.4 | 133104   | 53845.09 | 12629.07 | 59799.86 | 80630.14 | 250632.1 | 199288.8 | 23454.85 | 112725.9 |
| 876874.2 | 595624.8 | 0        | 3880.688 | 0        | 134276.1 | 1576948  | 1241562  | 99956.45 | 550300.1 |
| 1187692  | 908468.3 | 2491973  | 1131053  | 4823098  | 565331.8 | 2541741  | 2292104  | 52648.21 | 1913401  |
| 1463308  | 1747474  | 640734.3 | 197011.3 | 762853.5 | 22287360 | 18119139 | 4525643  | 235053.4 | 481108.9 |
| 174916.8 | 146958.4 | 0        | 2425.914 | 8492.168 | 69296.46 | 256345.1 | 329258.7 | 11880.98 | 100415.8 |
| 2137287  | 1214800  | 736263.7 | 244055.9 | 1188372  | 622427.9 | 3080032  | 3665894  | 648142.5 | 1199433  |
| 17057397 | 15443724 | 1709996  | 413166.9 | 1649047  | 2624916  | 24276907 | 39554821 | 5349411  | 14219828 |
| 39951.96 | 41158.42 | 72105.45 | 70970.16 | 57438.24 | 646863.6 | 1958555  | 21602.46 | 0        | 10207.7  |
| 121164.1 | 101300.6 | 0        | 9383.83  | 4089.477 | 64844.12 | 164873.7 | 213639.9 | 39136.48 | 126736.5 |
| 6728425  | 5371898  | 1624411  | 256125.2 | 462732.1 | 1480734  | 10024501 | 15952736 | 4292239  | 4657248  |
| 5379497  | 3588348  | 1580557  | 542227.6 | 2791224  | 1753604  | 7214048  | 8869955  | 665700.6 | 2501113  |
| 184019.7 | 121518.7 | 129740.4 | 146264.3 | 146234.1 | 1023422  | 1033770  | 162303.4 | 55197.73 | 105112.8 |
| 305212.8 | 307143.6 | 0        | 2811.79  | 20819.78 | 125545.4 | 350653   | 757918.3 | 28825.79 | 8035.589 |
| 114011.6 | 77203.84 | 52535.56 | 33873.73 | 154576.3 | 1012209  | 1846045  | 139776.5 | 16933.01 | 48156.47 |
| 784810.5 | 693305.9 | 95816.47 | 15214.34 | 407225.5 | 522074.9 | 620626.1 | 1102293  | 91314.67 | 124349.3 |
| 991334   | 468063.5 | 227298.2 | 134151.3 | 497843.6 | 496173.9 | 1504974  | 1084597  | 289138.4 | 830720.8 |
| 196611.1 | 138184.8 | 42198.05 | 2276.372 | 39655.39 | 173914.9 | 227954.9 | 367714.3 | 29489.2  | 83548.49 |
| 625703.7 | 791132.8 | 364168.5 | 425291   | 1049503  | 2675223  | 4676865  | 354461.2 | 250809.1 | 267504.6 |
| 252846.1 | 308927.5 | 13760.47 | 9124.209 | 12321.92 | 111244.9 | 133116   | 784026.5 | 21292.33 | 52091.09 |
| 127983.4 | 105024   | 142406.3 | 105508.8 | 374853   | 1890918  | 475072.7 | 105216.8 | 78503.19 | 26088.26 |
| 4493968  | 3524443  | 298153.3 | 346485.8 | 836076.8 | 4647459  | 4126347  | 3897777  | 582932.1 | 1736500  |
| 584555.5 | 343481.9 | 56439.72 | 61096.95 | 169445.6 | 587196.6 | 706133.2 | 684605.6 | 127316.6 | 335958.8 |
| 423589.4 | 180988.5 | 65765.45 | 93655.26 | 200990.4 | 606828.3 | 321049.7 | 259266.4 | 221878.6 | 434706.2 |
| 2573151  | 4032722  | 2594.529 | 11015.73 | 13764.51 | 12381.52 | 62048.23 | 85713.32 | 9491517  | 2814491  |
| 3892980  | 3047954  | 17760.56 | 3274.225 | 61948.82 | 2701020  | 5371956  | 8085914  | 421767.6 | 2024545  |
| 10052636 | 3926362  | 9147.832 | 0        | 145657.7 | 201718.2 | 20234195 | 16694543 | 6347022  | 8496178  |
| 1305176  | 2034807  | 13131.36 | 23145.73 | 14967.94 | 30315.08 | 9624.632 | 0        | 4742660  | 1600814  |
| 4755709  | 4706120  | 1519885  | 793601.7 | 1747791  | 1614840  | 3140590  | 9603824  | 36760.76 | 972350   |

|          |          |          |          |          |          |          |          |          |          |
|----------|----------|----------|----------|----------|----------|----------|----------|----------|----------|
| 1021570  | 1079169  | 346665.2 | 333402   | 390604.4 | 355183.2 | 269075.2 | 246729.8 | 2680103  | 1562286  |
| 258987.8 | 210986.3 | 29756.33 | 53621.52 | 27379.11 | 119405.5 | 334229.1 | 273294.3 | 576762.1 | 51666.68 |
| 551118.2 | 384622.2 | 0        | 0        | 29208.6  | 8738.535 | 1005835  | 767915.5 | 59409    | 226991.1 |
| 6831825  | 6340738  | 13034.26 | 7644.568 | 55725    | 6151207  | 6475000  | 7728246  | 74954.63 | 962493.3 |
| 177798.4 | 83404.83 | 179658   | 98707.42 | 406293.2 | 388951.4 | 276790.1 | 138873.5 | 79925.61 | 148507.8 |
| 115942.4 | 97957.43 | 50582.23 | 49554.89 | 282056.7 | 934735.1 | 430672.2 | 205565.9 | 26775.13 | 60383    |
| 931626.8 | 1160212  | 0        | 7318.87  | 339796   | 315093.3 | 318013.9 | 1658454  | 32819.08 | 282750.2 |
| 331276.2 | 262321.4 | 189641.5 | 386976.6 | 1000021  | 3818245  | 925410.6 | 343375.9 | 94752.62 | 104132.3 |
| 6250005  | 9201751  | 236355.5 | 10298.24 | 993124.1 | 0        | 937832.6 | 22447346 | 1112323  | 4328941  |
| 772408.8 | 463205.7 | 2828.312 | 0        | 0        | 134704.7 | 1438494  | 1194726  | 91303.97 | 499394.5 |
| 3496226  | 2450175  | 12580.64 | 22359.1  | 127830.8 | 693272.9 | 6135403  | 4524428  | 779809.9 | 2094064  |
| 203302.7 | 75095.8  | 248020.7 | 273494.1 | 90060.84 | 443449.2 | 640542.3 | 155318.2 | 179286.8 | 118362.4 |
| 20282429 | 3933967  | 14226702 | 18499294 | 20550542 | 13054086 | 19971600 | 26290316 | 16640313 | 16934829 |
| 1779814  | 1024730  | 3491.008 | 0        | 43309.59 | 298966.3 | 3339147  | 2747221  | 250610.6 | 1236057  |
| 8260641  | 10640199 | 274233.5 | 29767.1  | 0        | 191914.7 | 6798571  | 25200373 | 0        | 3598810  |
| 368966   | 364384   | 38537.34 | 3097.82  | 38971.36 | 359784.4 | 213543.7 | 881069.2 | 4213.219 | 47862.48 |
| 566218.4 | 308070.4 | 7376.15  | 3500.277 | 17139.54 | 19312.94 | 1096426  | 899284.8 | 145319.9 | 583129.8 |
| 3315286  | 2709880  | 216685.7 | 106416.1 | 417668.5 | 3422896  | 3071542  | 2764999  | 330911.6 | 1240162  |
| 2170209  | 2742285  | 2086358  | 2454463  | 27055947 | 1191218  | 13544597 | 6404090  | 41169.48 | 147907.1 |
| 541468.6 | 589632.8 | 5780.024 | 0        | 155313.4 | 435803.7 | 222485.4 | 1135642  | 8791.177 | 57468.84 |
| 54345.99 | 46498.61 | 62654.25 | 66416.55 | 161627.5 | 1081815  | 254943.3 | 73831.76 | 63702.96 | 17587.29 |
| 27690769 | 3977370  | 15376264 | 22190726 | 20093936 | 33943972 | 23510502 | 27770057 | 22453416 | 26326786 |
| 109560.8 | 111228.6 | 2641.23  | 0        | 14936.33 | 88752.15 | 80430.48 | 227797.2 | 6287.937 | 0        |
| 325791.3 | 151248.8 | 405786.2 | 498573.5 | 108940.2 | 1275357  | 750279.8 | 370282.4 | 337173   | 73412.02 |
| 2217749  | 3435756  | 0        | 7262.223 | 16749.47 | 147153.8 | 114945.2 | 649441.3 | 480696.9 | 926672.2 |
| 457275.3 | 747194   | 182491.8 | 1433467  | 1078147  | 7361283  | 1393072  | 131421.9 | 0        | 56633.14 |
| 300490.8 | 353538.2 | 0        | 0        | 0        | 143366.5 | 228934.3 | 864452.3 | 0        | 13799.39 |
| 1217119  | 1561791  | 22462.81 | 3791.411 | 0        | 70477.89 | 1008689  | 3661066  | 0        | 28176.36 |
| 914030.9 | 1326646  | 83044.75 | 91609.34 | 89661.8  | 59613.42 | 77643.49 | 38474.73 | 3157860  | 1096904  |
| 9157349  | 8172019  | 389429.7 | 32570.32 | 241413.4 | 2357927  | 13566928 | 22377305 | 2750275  | 7763200  |
| 631242.5 | 570132.5 | 36045.27 | 3027.382 | 163196   | 9740910  | 11709447 | 209499.2 | 1420081  | 163255.8 |
| 1198578  | 758103.7 | 5678.066 | 3448.865 | 11058.24 | 19856.49 | 2275913  | 2076744  | 226399.8 | 1174490  |
| 1329963  | 1776540  | 62528.85 | 73901.69 | 62351.74 | 376569.8 | 483648.3 | 278235.4 | 314433.1 | 295232.6 |
| 308567   | 249461   | 9378.291 | 2767.748 | 70379.18 | 129157   | 437192.1 | 208864.5 | 56730.12 | 203731.8 |
| 2665457  | 3386210  | 65929.81 | 161561   | 122409.1 | 197493.1 | 2031893  | 2291641  | 401894   | 1452936  |
| 31832086 | 50582995 | 22822.99 | 81971.03 | 49915.62 | 44876.87 | 239466.1 | 112850.3 | 1.19E+08 | 31908763 |
| 3653083  | 3783090  | 136401.3 | 110652.1 | 450197.3 | 2263001  | 3111506  | 2355832  | 309513   | 1200540  |
| 77965    | 40836.99 | 82595.78 | 83205.21 | 110267.1 | 477432.2 | 167438.1 | 57956.18 | 52147.79 | 36524.19 |
| 211554.6 | 281998.1 | 40378.69 | 47206.93 | 19089.43 | 42368.48 | 23869.81 | 7909.416 | 663191   | 312564   |
| 2012406  | 2858025  | 71715.06 | 54716.3  | 450479.7 | 61335.41 | 452812.3 | 432529.6 | 6839313  | 2427357  |
| 24519718 | 21532612 | 4080227  | 2619931  | 9922378  | 8592256  | 26832461 | 52998738 | 776515.2 | 11026052 |
| 1431764  | 1116515  | 107389.9 | 87080.47 | 290408.3 | 1474150  | 1352927  | 1298018  | 216032.3 | 556329.7 |
| 32730206 | 27005521 | 11763773 | 6921284  | 19243298 | 4148382  | 33398962 | 73407617 | 1666498  | 22606614 |
| 253702.1 | 160382.9 | 232271.7 | 277702.6 | 253306.3 | 854864.4 | 576748.5 | 375918.9 | 64944.66 | 119997.3 |
| 210235.3 | 155868.9 | 115157.3 | 443578.1 | 255600.4 | 1600763  | 505086.1 | 204081.2 | 45424.94 | 179556.9 |
| 817553.2 | 594717.8 | 3550.584 | 6378.48  | 89408.77 | 436744.4 | 1252997  | 1400489  | 253812.2 | 753443.3 |
| 784454.3 | 551030.6 | 137622.4 | 168643.4 | 162952.8 | 866219.4 | 684962.7 | 434329.1 | 331764.4 | 386461.5 |



|          |          |          |          |          |          |          |          |          |          |
|----------|----------|----------|----------|----------|----------|----------|----------|----------|----------|
| 1.94E+08 | 2.18E+08 | 44116448 | 21675953 | 51879274 | 42239564 | 1.24E+08 | 5.69E+08 | 16098080 | 1.22E+08 |
| 1178572  | 599766.2 | 927624.2 | 7301295  | 4633380  | 1060987  | 1038231  | 728689.2 | 1031801  | 2229310  |
| 18636616 | 6655148  | 248078.7 | 82357.53 | 1345503  | 4974391  | 36046598 | 28763720 | 11206739 | 15102967 |
| 11381015 | 16575553 | 0        | 0        | 339436.7 | 643823.8 | 3995512  | 40061880 | 0        | 9796889  |
| 10660317 | 10949286 | 447505.2 | 381196.1 | 1298348  | 7377957  | 8600196  | 6815043  | 970998   | 3637061  |
| 222938.7 | 130198.6 | 258797.9 | 146109.1 | 589422.7 | 275277.8 | 497096.2 | 203146.4 | 226225.3 | 108198.5 |
| 433871   | 666241.1 | 0        | 2895.76  | 0        | 10632.73 | 71976.31 | 1602238  | 56844.24 | 58889.11 |
| 925763.7 | 1459010  | 12266.58 | 23468.1  | 0        | 7988.468 | 24515.16 | 32742.43 | 3421785  | 1039434  |
| 375980.1 | 496799.7 | 6665.625 | 0        | 0        | 54261.04 | 253256.6 | 257742   | 5707.351 | 266291.1 |
| 16049.98 | 27900.76 | 37223.55 | 36399.76 | 70956.12 | 568226.7 | 85866.49 | 65249.94 | 3514.707 | 0        |
| 268770.9 | 240460.5 | 0        | 0        | 18255.53 | 176418.7 | 327852.2 | 366347.9 | 6882.406 | 20007.18 |
| 383861.7 | 350336.5 | 17344.29 | 18436.76 | 6937.313 | 95481.9  | 554767.7 | 334960.2 | 104804.8 | 491515.6 |
| 6058586  | 8438026  | 75470.09 | 47274.94 | 0        | 26231.14 | 3631222  | 20625478 | 0        | 5084000  |
| 877509.3 | 495920.6 | 126564.8 | 238170.3 | 316860.2 | 908165.7 | 968637.2 | 866186.1 | 248068.8 | 594053.4 |
| 913041.4 | 543709.7 | 144664.7 | 25250.22 | 203988.2 | 442732.7 | 1461145  | 1514974  | 180966.4 | 558302.9 |
| 5196930  | 10735944 | 43846697 | 36690.64 | 1.2E+08  | 266923.2 | 4.4E+08  | 353003.5 | 24400462 | 196120   |
| 118698.3 | 76275.45 | 57405.16 | 77112.81 | 237891.8 | 927190.2 | 417141.3 | 181644   | 12160.2  | 129353.6 |
| 339330.3 | 451706.9 | 0        | 0        | 9861.948 | 0        | 260458.5 | 220241.8 | 15573.3  | 183905.6 |
| 1629078  | 1071942  | 176521.2 | 1648858  | 301099.5 | 555171.2 | 1690323  | 3236610  | 527016.1 | 771452.2 |
| 617097.2 | 399979.9 | 0        | 0        | 0        | 12092.46 | 1173231  | 1027813  | 38223.5  | 387962.6 |
| 784217.8 | 837944.8 | 24630.77 | 11303.41 | 98445.49 | 537568.1 | 576204.3 | 368621.4 | 44436.51 | 300038.5 |
| 6464877  | 6736814  | 1634432  | 379968.4 | 1560037  | 1256259  | 6034581  | 17263367 | 251553.3 | 7766350  |
| 478741.6 | 321692   | 406184.7 | 410025.5 | 1935466  | 387677.5 | 2061933  | 809214.6 | 532123.4 | 38169.29 |
| 464037.5 | 283396.4 | 143820.6 | 173554.3 | 209329.1 | 57851.1  | 668413.8 | 557780.7 | 66066.01 | 297784   |
| 2335288  | 1829811  | 2062307  | 4064468  | 10758297 | 2202728  | 4356612  | 4540317  | 29683.69 | 3510030  |
| 24956669 | 24731019 | 1193665  | 1054086  | 3123305  | 18368077 | 21285971 | 17039578 | 2544997  | 8509415  |
| 7688426  | 6633052  | 333694.4 | 186643.6 | 1071664  | 7766760  | 6796465  | 6353706  | 326773.1 | 2683528  |
| 13705797 | 19653869 | 195235.4 | 66648.14 | 448645.2 | 0        | 6390969  | 47698225 | 110766   | 10856428 |
| 54196.64 | 57506.86 | 100625.9 | 95104.44 | 60097.41 | 878427.1 | 2791147  | 15758.96 | 18240.55 | 15177.6  |
| 321027.3 | 333605   | 85461.78 | 68386.55 | 59360.38 | 274794   | 63583.76 | 62391.9  | 38370.7  | 158994.2 |
| 2593150  | 1767418  | 302989   | 123091.1 | 719039.8 | 1417379  | 3774632  | 2717179  | 444015.7 | 1747811  |
| 1644028  | 1074431  | 245993   | 317970.9 | 260762.4 | 1070748  | 2314830  | 1386196  | 342797.1 | 1162209  |
| 1824952  | 1234604  | 631918.6 | 393887.7 | 1198527  | 1767380  | 1130746  | 2606320  | 63913.67 | 3265805  |
| 879256.2 | 1300056  | 0        | 0        | 11896.97 | 56613.34 | 277180   | 230478.4 | 20103.69 | 927083.1 |
| 1189392  | 1537131  | 285019.2 | 364129.2 | 281764   | 22850.22 | 205214.1 | 85439.05 | 3645185  | 1768973  |
| 109435.1 | 96414.42 | 72668.31 | 40860.39 | 73229.83 | 848537.7 | 1083163  | 275226.9 | 24981.85 | 86847.04 |
| 805313.8 | 877902.9 | 47434.08 | 2978.711 | 85414.4  | 237046.9 | 835795.4 | 2164549  | 0        | 158816.2 |
| 599552.5 | 925329.8 | 23196.28 | 35607.78 | 44578.45 | 0        | 18496.88 | 11459.31 | 2183859  | 664460.6 |
| 1618763  | 1188292  | 440506.8 | 423022.1 | 2393609  | 11878044 | 10642908 | 2940284  | 255615.5 | 477174.2 |
| 273665.5 | 279137.5 | 107902.9 | 122476.3 | 579271.4 | 1409516  | 1009334  | 554749.9 | 56504.25 | 85857.08 |
| 1087672  | 1520901  | 195870.3 | 219393.3 | 186366.7 | 56241.4  | 53305.27 | 16549.36 | 3552055  | 1579490  |
| 787954.1 | 1205484  | 33774.11 | 63237.63 | 59824.76 | 15075.16 | 24692.1  | 15492.01 | 2809775  | 1008123  |
| 554026.3 | 792355   | 94921.56 | 93821.29 | 46057.24 | 32410.76 | 42803.75 | 13819.83 | 1867714  | 737698   |
| 905193.7 | 438832.9 | 6248.54  | 0        | 11307.13 | 122767.3 | 1774611  | 1150638  | 248011.7 | 658847.9 |
| 65173.01 | 60048.62 | 19454.41 | 28935.18 | 164859.4 | 637725.4 | 268926.2 | 114404   | 4049.07  | 7053.732 |
| 3774535  | 2035063  | 957303.7 | 524578.7 | 1779238  | 1771214  | 5635601  | 5713877  | 1107169  | 2109921  |
| 1040152  | 967367   | 34785.57 | 37608.86 | 38745.79 | 1286070  | 560490   | 2670930  | 506869   | 234057   |

|          |          |          |          |          |          |          |          |          |          |
|----------|----------|----------|----------|----------|----------|----------|----------|----------|----------|
| 1.45E+08 | 1.01E+08 | 20609200 | 13372714 | 56831914 | 24946987 | 2.25E+08 | 2.75E+08 | 25259976 | 68735338 |
| 787533.2 | 723527.2 | 285132.4 | 439012.9 | 309000.3 | 571788   | 59708.04 | 1514679  | 72793.04 | 179337.4 |
| 1850572  | 2082984  | 44158.93 | 67328.95 | 817351.4 | 731423.5 | 1074840  | 4705146  | 197261.7 | 768942.8 |
| 6691368  | 5753910  | 154590.7 | 132369.2 | 1305643  | 2981566  | 9058368  | 7748357  | 865440.3 | 2524683  |
| 601609.7 | 444485.4 | 742002.2 | 1008558  | 3799703  | 783839   | 868371   | 435708   | 0        | 1041919  |
| 2339477  | 1887370  | 173570.3 | 149420.2 | 399669   | 2377386  | 2209182  | 1805839  | 322069.7 | 922524.1 |
| 1184967  | 831486.3 | 580627.4 | 779629.9 | 59861.15 | 238468.4 | 1415884  | 2244141  | 359989.2 | 551533.4 |
| 11204163 | 14581898 | 378513.5 | 217160.2 | 3827605  | 6033241  | 148235.6 | 36645416 | 120120.7 | 8402194  |
| 6347255  | 6533843  | 271622.4 | 240482.5 | 706108.6 | 4266483  | 5411462  | 4151751  | 621383.5 | 2125984  |
| 2023471  | 2092062  | 72780.57 | 21414.43 | 198738.9 | 1188378  | 1930255  | 1400970  | 170848.6 | 668397.9 |
| 4772887  | 4260481  | 2566333  | 2264095  | 848974.3 | 2277638  | 2651751  | 12174268 | 3251266  | 1208434  |
| 252798.5 | 203697.4 | 98661.53 | 97628.87 | 36447.66 | 143242.1 | 239532.7 | 246549.9 | 137988.4 | 68375.41 |
| 82572.07 | 58168.21 | 60946.82 | 59504.05 | 240680.5 | 383366.6 | 115750.6 | 62309.63 | 75364.24 | 41527.7  |
| 395549.8 | 359055.6 | 7633.961 | 2152.081 | 164274.7 | 258273   | 381976.7 | 617936.8 | 40775.61 | 42245.21 |
| 1324985  | 942394.9 | 153730.4 | 45573.58 | 224256   | 364779.2 | 2157919  | 2594271  | 30872.93 | 1412621  |
| 2211189  | 2011188  | 1512483  | 1769067  | 6662178  | 20946770 | 5151294  | 2693994  | 196390.8 | 772648   |
| 1414526  | 1557272  | 42354.21 | 11763.87 | 119594.5 | 255487.1 | 1622013  | 4058295  | 24499.07 | 737198.5 |
| 62900.32 | 27955.06 | 76747.33 | 104322.2 | 107791   | 666695.5 | 137464.2 | 105866.5 | 50367    | 44743.21 |
| 331676   | 240801.9 | 70925.94 | 78741.07 | 103540.5 | 229801.5 | 376811.7 | 237968.3 | 83256.43 | 169502.9 |
| 414406.8 | 375714.1 | 28262.67 | 37302.98 | 57005.73 | 322241.3 | 404774.7 | 257799.4 | 105480.7 | 74150.03 |
| 6500694  | 9391634  | 102777   | 52791.47 | 73140.91 | 44919.51 | 3119641  | 22752764 | 0        | 5251695  |
| 449998.2 | 474792.7 | 45926.05 | 95008.51 | 79877.01 | 235135.1 | 312320.7 | 95839.86 | 318386.3 | 303350.5 |
| 455116.2 | 117382   | 0        | 0        | 0        | 0        | 947718.6 | 451082.5 | 254840   | 496671.2 |
| 582632.8 | 260561.6 | 14630.5  | 12089.1  | 20779.69 | 36568.33 | 1158706  | 838898.7 | 630717.9 | 434077.7 |
| 2290170  | 3047118  | 117391.3 | 73053.73 | 68096.29 | 851032.3 | 904186.1 | 727469.3 | 199562.2 | 604564.3 |
| 43380806 | 42654841 | 2201493  | 1864783  | 5654273  | 33209062 | 37356047 | 28918492 | 4195845  | 15095288 |
| 3529943  | 3089635  | 189308.2 | 165839.6 | 532061.8 | 3500149  | 3061778  | 2896152  | 110588.1 | 1219442  |
| 263547.1 | 247677.2 | 64157.14 | 53824.74 | 67421.78 | 226487.2 | 128931.1 | 277890   | 23474.64 | 43171.68 |
| 2204372  | 2296480  | 651202.1 | 715829.4 | 472572.1 | 748368.4 | 1330325  | 2799534  | 5480626  | 0        |
| 3712980  | 5319396  | 32525.45 | 26763.61 | 38276.58 | 438295.8 | 1590882  | 1212906  | 14110.92 | 4072512  |
| 221943.3 | 82449.75 | 103797.9 | 129279.9 | 120830.1 | 254830.3 | 203186.4 | 93110.5  | 302799.2 | 198983.6 |
| 768087.6 | 652293.4 | 97272.82 | 119901.1 | 118027.7 | 766680.8 | 613550.4 | 426492.8 | 208794.5 | 285923.7 |
| 229281.8 | 142711   | 0        | 7991.493 | 6990.786 | 0        | 440432.1 | 344322.7 | 55722.96 | 188867.7 |
| 778553.7 | 555729.2 | 83291.69 | 140202.4 | 259082.6 | 694788.2 | 836313.8 | 564393.2 | 203730.8 | 514216.2 |
| 7965504  | 11995626 | 0        | 4143.295 | 236614.4 | 0        | 2594267  | 28868673 | 3759.449 | 4918825  |
| 7155754  | 7489797  | 1372961  | 1065372  | 1829526  | 2795622  | 5419474  | 19617868 | 41489.08 | 4013597  |
| 536653.4 | 357633.1 | 55205.77 | 21565.34 | 410222.5 | 81335.66 | 759016.4 | 437022.2 | 196843.8 | 333114.1 |
| 112550.7 | 105313.3 | 65993.44 | 332780.9 | 725235.1 | 260304.8 | 48613.57 | 286368.5 | 0        | 93771.42 |
| 4990205  | 2861983  | 642839.8 | 579254.5 | 1242869  | 5265764  | 6092688  | 3874322  | 905423.3 | 4826470  |
| 9491442  | 10353921 | 120174.2 | 95121.46 | 96612.43 | 3585976  | 10383011 | 26262162 | 270854.4 | 3735195  |
| 14602198 | 14725595 | 617583.8 | 534648.3 | 1762199  | 10014202 | 13193673 | 9999282  | 1476630  | 4851011  |
| 47724985 | 57114019 | 5555580  | 2662398  | 14462072 | 2485722  | 35893525 | 1.43E+08 | 66233.08 | 23788366 |
| 827271.7 | 872236.3 | 259100.6 | 328609.1 | 315467.9 | 413631.2 | 133187.8 | 1169572  | 167784.4 | 395888.4 |
| 460713.7 | 217147.6 | 216245.7 | 247726.6 | 284551.6 | 442205.8 | 412259.2 | 395225.4 | 257938   | 268424.9 |
| 147977.2 | 50858.4  | 99488.32 | 65010.75 | 937605.4 | 229518.9 | 535691.2 | 153636.9 | 168351.6 | 214194.4 |
| 860277.1 | 854267.1 | 114568   | 36626.32 | 90050.92 | 624488.8 | 728160.5 | 411843.2 | 208437.4 | 113595.1 |
| 265731.5 | 29570.04 | 160885.6 | 187321.9 | 193201.8 | 323218.1 | 254253.6 | 261265.1 | 240994.4 | 313614.3 |

|          |          |          |          |          |          |          |          |          |          |
|----------|----------|----------|----------|----------|----------|----------|----------|----------|----------|
| 5539728  | 8056886  | 827839.7 | 833227.1 | 737459.6 | 168172.8 | 408523.7 | 136657.4 | 18885437 | 7438890  |
| 185573.9 | 65469.29 | 121329.2 | 50208.37 | 225324.3 | 1004428  | 1033918  | 145018.2 | 92865.79 | 226067.8 |
| 288311.8 | 299340.8 | 177928.7 | 270814.4 | 899051   | 3539801  | 818281.4 | 232035.1 | 31907.28 | 58144.77 |
| 9265928  | 1138933  | 5379758  | 6911266  | 7096870  | 11525861 | 7967986  | 9887891  | 7487654  | 9213684  |
| 343193.7 | 179234.2 | 328652.6 | 352832.3 | 390715.8 | 1456073  | 694344.2 | 555717.4 | 113107   | 259222.9 |
| 727113.9 | 811318.2 | 19696.78 | 0        | 58667.91 | 407772.7 | 604663   | 358259.7 | 87395.86 | 239169.9 |
| 992550.5 | 955648.6 | 0        | 0        | 17312.9  | 842239   | 980390.4 | 2491273  | 52944    | 290102.7 |
| 1629580  | 2436469  | 158465.3 | 146096.2 | 164720.9 | 46124.81 | 167618.6 | 37675.22 | 5759617  | 1939929  |
| 1128639  | 1260233  | 6434.362 | 0        | 14895.76 | 353880.2 | 1249304  | 3047111  | 20915.6  | 50163.56 |
| 577069.3 | 494232.8 | 11429.24 | 23259.3  | 219947.7 | 450358.5 | 571781.3 | 1154084  | 82882    | 601867   |
| 659182.4 | 247703.6 | 10501.08 | 11619.66 | 14933.94 | 105353.9 | 1318452  | 649549.3 | 1076580  | 591300.3 |
| 92081.7  | 41450.51 | 24787.55 | 5452.54  | 132073.1 | 870022.7 | 641584.7 | 130010.7 | 30194.86 | 72391.12 |
| 201194.7 | 145904.2 | 190714.1 | 260949.6 | 269474.9 | 654414.4 | 293576   | 201226   | 103011.7 | 66873.9  |
| 917938.2 | 992042.8 | 13447.61 | 4022.017 | 34863.73 | 594647.1 | 809148.1 | 658102.7 | 74506.35 | 195601   |
| 579668.5 | 502308.9 | 365015.6 | 453059.5 | 1726377  | 5470660  | 1356310  | 785633.6 | 39842.91 | 159625.9 |
| 8035739  | 8349361  | 315577.7 | 292393.3 | 942517.8 | 5139831  | 7152092  | 5212040  | 823083.1 | 2532035  |
| 8170950  | 10639332 | 0        | 55419.86 | 5601.664 | 968423.6 | 6801892  | 24420076 | 47393.86 | 613506.5 |
| 2464931  | 3665216  | 377406.5 | 397452.9 | 309851.5 | 26489.62 | 0        | 24920.92 | 8529531  | 3351078  |
| 6953592  | 5699411  | 463965.2 | 366947.9 | 1159634  | 7358657  | 6358867  | 5798644  | 728627   | 2500293  |
| 483179.8 | 424050.9 | 55322.67 | 2116.639 | 152990.2 | 362590.4 | 476692.1 | 1113024  | 82257.85 | 114314   |
| 696702.8 | 419277.2 | 5686.695 | 0        | 6886.154 | 12218.15 | 1362241  | 1135992  | 25881.65 | 939623.5 |
| 788677.9 | 917495.4 | 5113.204 | 0        | 0        | 75203.84 | 931537.6 | 2284644  | 7579.622 | 278411.7 |
| 7301301  | 6013709  | 897128.4 | 237155.2 | 3558262  | 5305361  | 7120973  | 10605230 | 1032389  | 1467897  |
| 7196947  | 4559983  | 629635.7 | 1161223  | 1349929  | 8944242  | 7033137  | 13816103 | 3007789  | 2752587  |
| 262169.2 | 101972.8 | 380043.3 | 427640.9 | 187779.2 | 3043993  | 9779289  | 165836.9 | 205623.8 | 207332.4 |
| 180000   | 188339   | 148364.5 | 161556.1 | 460380.2 | 1409661  | 356142   | 173352.9 | 64433.62 | 34295.76 |
| 325991.2 | 242999.8 | 3374.371 | 7902.362 | 17384.87 | 26508681 | 76008388 | 322348.3 | 32357.95 | 374383.9 |
| 804643.7 | 842867.5 | 1316659  | 1769556  | 1443336  | 1555955  | 661315   | 761360   | 82209.69 | 285981   |
| 245629.3 | 272176.1 | 32731.57 | 0        | 0        | 13033.72 | 305599   | 702682.6 | 0        | 264915.5 |
| 177360.6 | 39331.4  | 158944.8 | 167461.5 | 171513.2 | 363885.4 | 370242.5 | 140128.3 | 149755   | 157037.3 |
| 1774237  | 1507385  | 14673.67 | 35659.78 | 25100.87 | 1309881  | 2296282  | 4060801  | 140441.9 | 835654.6 |
| 2637650  | 3125393  | 227740.6 | 32929.28 | 48923.02 | 767501.6 | 2386875  | 7953412  | 0        | 772821.4 |
| 991846.3 | 965700.3 | 2007264  | 2608738  | 270666.6 | 1149341  | 3145830  | 2257598  | 0        | 254926.3 |
| 68889.43 | 80360.65 | 98665.9  | 53477.75 | 255931.2 | 745670.5 | 85309.81 | 205978.9 | 28981.27 | 25150.57 |
| 218180.6 | 173440.9 | 31744.72 | 53243.53 | 104304.5 | 3257901  | 2310863  | 479621.6 | 32442.21 | 91704.37 |
| 1017292  | 1100583  | 205098.8 | 90288.94 | 51061.68 | 570979.4 | 760972.1 | 351357.5 | 147924.1 | 308924.5 |
| 360461.2 | 227298.1 | 247395.7 | 398756.2 | 1329002  | 567204.8 | 621835.8 | 667736.4 | 29942.31 | 339702.9 |
| 2306941  | 2462947  | 32491.61 | 63026.85 | 230258.1 | 1244599  | 2219599  | 1589516  | 196308.3 | 732471.6 |
| 1637664  | 1351960  | 65480.65 | 61417.43 | 249979.8 | 737828.5 | 2364373  | 1830674  | 220343   | 706141.9 |
| 185456.5 | 162864.2 | 69077.06 | 97663.51 | 355925.8 | 1274172  | 687205.3 | 409033   | 30000.57 | 143731.9 |
| 31315.83 | 48455.69 | 9521.631 | 11647.38 | 51114.92 | 295235   | 182968.7 | 114110.5 | 0        | 0        |
| 110108.6 | 60314.17 | 137010.9 | 145865.8 | 89624.51 | 977544.9 | 3015708  | 27400.41 | 126629.9 | 193962.5 |
| 212772   | 210432.6 | 36328.43 | 13303.98 | 23053.17 | 229908.6 | 94849.15 | 563531.1 | 60918.75 | 37429.96 |
| 88135.9  | 27459.53 | 69200.11 | 71564.11 | 54937.11 | 57393.35 | 96287.28 | 79335.34 | 53789.05 | 76983.23 |
| 22885332 | 34214289 | 165968.2 | 158755.6 | 403715.8 | 221835.6 | 9206095  | 82583842 | 0        | 14978163 |
| 897330.3 | 961258.5 | 973459.7 | 1446079  | 2782078  | 10538648 | 1211102  | 898307.9 | 239770.7 | 205529.8 |
| 814453.2 | 697412.6 | 549171.4 | 744264.1 | 2580521  | 8794136  | 1811671  | 871238.5 | 77934.94 | 278316.7 |

|          |          |          |          |          |          |          |          |          |          |
|----------|----------|----------|----------|----------|----------|----------|----------|----------|----------|
| 460802.9 | 225021   | 342145.7 | 1377943  | 637912.6 | 1380641  | 278687.5 | 760195.1 | 286830.9 | 530194.9 |
| 3567379  | 3131424  | 246540.9 | 64201.12 | 474250.6 | 3565913  | 3238565  | 2860452  | 241005.5 | 1169114  |
| 17701239 | 17889982 | 849733   | 728457.4 | 2223493  | 13395473 | 15051658 | 11431715 | 1692389  | 5643852  |
| 1.09E+09 | 6.55E+08 | 2.78E+08 | 1.95E+08 | 6.39E+08 | 3.33E+08 | 1.57E+09 | 1.96E+09 | 3.68E+08 | 8.39E+08 |
| 107701.3 | 82831.86 | 24762.84 | 10366.74 | 58056.18 | 53359.77 | 123253.8 | 155308.4 | 10239.52 | 75670.04 |
| 806886.5 | 529953.4 | 24278.05 | 4186.371 | 10695.67 | 21487.3  | 1542306  | 1434436  | 520401.5 | 959419   |
| 1741430  | 2684272  | 3927.358 | 8884.916 | 8393.919 | 5120.291 | 520193.2 | 545899.9 | 16176.84 | 1654829  |
| 17707068 | 13913266 | 558603.6 | 346565   | 15199730 | 904274.1 | 22639174 | 36605175 | 1083809  | 9005630  |
| 960735.8 | 1254603  | 5290.992 | 0        | 25665.05 | 27511.96 | 865637.3 | 785706.6 | 10379.81 | 558350.5 |
| 80139.4  | 68519.29 | 0        | 0        | 0        | 0        | 140444.2 | 160089.6 | 0        | 35991.62 |
| 4149316  | 2655807  | 53273.56 | 56708.36 | 855748.4 | 1614681  | 7066047  | 5071802  | 584039   | 2169178  |
| 551847.2 | 395787.7 | 93740.61 | 93810.53 | 475476.5 | 6003791  | 4922330  | 493680.1 | 70986.97 | 332757.5 |
| 340533.2 | 301455   | 83343.99 | 87996.66 | 105403.1 | 271199.5 | 224906.4 | 500727.7 | 24908.14 | 281132.1 |
| 184549.1 | 174296.1 | 6602.479 | 21137.14 | 179880.1 | 1803772  | 1896326  | 475864.1 | 5153.576 | 133447.9 |
| 11257066 | 17490057 | 31722.93 | 0        | 0        | 99460.2  | 3041611  | 42006858 | 3687.778 | 7384229  |
| 14318995 | 21498525 | 61236.2  | 7038.654 | 108800.5 | 1167431  | 4926006  | 51932570 | 0        | 9715617  |
| 1489538  | 1538988  | 42231.46 | 34244.01 | 142157.1 | 1008370  | 1381220  | 971773.6 | 132070.1 | 525298.9 |
| 856517.1 | 664280   | 103739   | 194442.6 | 87829.07 | 934114.5 | 758013.7 | 455772.1 | 273200.9 | 394595   |
| 1405006  | 560425.1 | 1105397  | 1271802  | 953982.2 | 1232024  | 696519.5 | 799690.1 | 2134363  | 1623107  |
| 506930.5 | 92482.86 | 421132.8 | 528525.9 | 534197.9 | 74324.51 | 374867.6 | 632162.5 | 542475.9 | 518046   |
| 378633.9 | 529372.5 | 83864.1  | 93512.94 | 68754.15 | 20761.38 | 21714.08 | 24077.1  | 1235339  | 554979.4 |
| 2941582  | 1199204  | 291624.4 | 122649.9 | 517182.5 | 4021096  | 3424709  | 2712229  | 1580770  | 2056228  |
| 603423.5 | 901339.5 | 105314.5 | 85406.71 | 40222.81 | 35486.87 | 20127.65 | 0        | 2140486  | 682290.8 |
| 5357404  | 6170932  | 23156.4  | 13542.23 | 250061.3 | 53040.27 | 6722746  | 13198031 | 6143.29  | 2094117  |
| 119462.3 | 94477.44 | 57649.23 | 132000.8 | 245553.6 | 930270.6 | 297976.8 | 95415.19 | 76638.08 | 41068.75 |
| 258548.2 | 74015.3  | 462899.5 | 485149   | 73803.6  | 336028.6 | 493198   | 247779.7 | 235662.1 | 176701.2 |
| 397165.6 | 343096.6 | 34676.69 | 2774.686 | 64521.55 | 395605.1 | 367424   | 914428.6 | 141106.8 | 57699.99 |
| 26167530 | 37857818 | 245292.1 | 355492.3 | 13195884 | 543705.3 | 1553903  | 89427442 | 0        | 6322944  |
| 5253539  | 5959856  | 526187.8 | 230257.7 | 1379019  | 129797.1 | 5430572  | 14789430 | 3257.962 | 3168849  |
| 68205.67 | 41060.92 | 41947.16 | 27206.62 | 125453.5 | 307842.6 | 200365.9 | 111511.1 | 25169.3  | 39751.06 |
| 342593.5 | 360104.5 | 0        | 0        | 170044.6 | 254004.8 | 177557.8 | 940322.5 | 32531.47 | 140528.9 |
| 118416.9 | 161992.5 | 5376.753 | 32641.02 | 313679.9 | 3513019  | 10966660 | 29609.04 | 0        | 15633.43 |
| 331953.9 | 185586.8 | 850512.9 | 1088283  | 462633.4 | 373094.2 | 119979.2 | 252063.2 | 587536.9 | 451275.7 |
| 2908522  | 3461916  | 16923.63 | 4694.099 | 169269.9 | 202694.1 | 3286595  | 8546165  | 29609.21 | 1924761  |
| 22257953 | 15952099 | 1465803  | 1606710  | 9245596  | 5524996  | 34535098 | 39259974 | 418749.9 | 35147595 |
| 486720.9 | 489450.9 | 42694.21 | 39341.16 | 56842.83 | 295865.7 | 468598.9 | 219920.2 | 41974.47 | 135112.7 |
| 1300200  | 1769727  | 147476.3 | 72165.82 | 237019.4 | 407001.7 | 287369.9 | 295532.1 | 461465.5 | 565642.8 |
| 3436615  | 4143005  | 43824.63 | 56264.05 | 1214514  | 1806493  | 1462187  | 9380668  | 48424.81 | 450261.3 |
| 13128572 | 20059012 | 9973.62  | 21266.4  | 370394.6 | 644195.9 | 3960846  | 48409830 | 0        | 8610098  |
| 7235180  | 11609063 | 11103.02 | 5235.981 | 0        | 8851.525 | 1104745  | 27546252 | 0        | 5883168  |
| 6807048  | 9768460  | 63371.98 | 14768.41 | 834823   | 95696.14 | 3429959  | 23655112 | 14498.97 | 6438630  |
| 8129435  | 10279179 | 337136.9 | 208861.5 | 4151997  | 642994.8 | 4074326  | 21400617 | 138984.7 | 17119546 |
| 639904.1 | 487861.4 | 161963.2 | 13953.17 | 282458.5 | 122372.6 | 920799.1 | 1428882  | 119590.8 | 400252.7 |
| 517615.4 | 517852   | 7299.3   | 8971.098 | 2911.99  | 189524.5 | 688075.7 | 998986.5 | 83763    | 276580   |
| 3.51E+08 | 5.43E+08 | 13621284 | 3956322  | 88447853 | 5637802  | 6979387  | 1.29E+09 | 472784.2 | 1.01E+08 |
| 7937769  | 3679399  | 6077856  | 21689521 | 5.03E+08 | 19470382 | 1.26E+08 | 5483236  | 7408492  | 11190035 |
| 1764677  | 2908417  | 3148.884 | 7977.447 | 25329.44 | 4186.838 | 20077.74 | 50221.8  | 6764581  | 1907474  |

|          |          |          |          |          |          |          |          |          |          |
|----------|----------|----------|----------|----------|----------|----------|----------|----------|----------|
| 102088.9 | 67874.97 | 66904.61 | 82274.85 | 74367.79 | 43435.79 | 35440.86 | 186175.2 | 48738.03 | 17935.63 |
| 7825935  | 9808835  | 88879.71 | 81665    | 2322628  | 3837674  | 3117099  | 23260410 | 309895.9 | 1312845  |
| 349282.2 | 147863.1 | 106770.9 | 187984.6 | 170937.5 | 424239.2 | 314205.6 | 317859.1 | 134278.6 | 316099.7 |
| 524940.8 | 186023   | 49176.15 | 392867.4 | 408004.2 | 638960.7 | 354778.6 | 619280.5 | 526190.9 | 480411.7 |
| 3.16E+08 | 3.41E+08 | 4402431  | 3240547  | 13240907 | 1.44E+08 | 3.45E+08 | 8.41E+08 | 2632160  | 1.81E+08 |
| 245525.1 | 158339.3 | 99145.08 | 93690.55 | 122763.3 | 160084.6 | 256356   | 425597.9 | 27093.6  | 153106.7 |
| 69268589 | 69204836 | 3851445  | 3146033  | 9523632  | 55011716 | 58871975 | 43346910 | 7451357  | 24200251 |
| 1.22E+08 | 67157624 | 1688842  | 607110.3 | 5404113  | 77795405 | 2.09E+08 | 1.67E+08 | 1.25E+08 | 1.27E+08 |
| 2418604  | 2557332  | 106589.6 | 86223.38 | 243876.9 | 1664941  | 2070337  | 1538362  | 152010.2 | 772186.1 |
| 1822299  | 1441234  | 103237.8 | 91603.64 | 369894.1 | 1910732  | 1821767  | 1543006  | 207071.3 | 740904.1 |
| 204628   | 128027   | 103501.4 | 113100.1 | 118724.8 | 2029709  | 1376232  | 283295   | 11766.3  | 200680.9 |
| 844336.9 | 717790.5 | 233538.4 | 73703.06 | 233806.3 | 178549.2 | 1138312  | 1936420  | 36332.88 | 463871.5 |
| 278098.3 | 261099.2 | 10871.99 | 4233.187 | 0        | 145661.4 | 368470.7 | 516365.5 | 12449.32 | 206540.8 |
| 127297   | 100163.1 | 10602.7  | 10421.88 | 128017.1 | 1385762  | 1103126  | 101981.4 | 5522.289 | 82940.62 |
| 199464.4 | 144385.7 | 46243.22 | 14917.43 | 70376.21 | 110693.7 | 266056.9 | 333690.3 | 65102.36 | 208532.9 |
| 1001106  | 1303846  | 16734.13 | 0        | 46622.57 | 147941.2 | 824208.5 | 3269296  | 10153.75 | 296321.8 |
| 546102   | 814939.8 | 78377.4  | 55740.69 | 38542.87 | 27614.15 | 83572.55 | 11270.55 | 1918004  | 678086   |
| 10904900 | 17071725 | 102204.1 | 0        | 0        | 0        | 3136304  | 40799761 | 0        | 8279884  |
| 138861.4 | 132902.6 | 30141.15 | 35353.41 | 60242.17 | 40246.66 | 122952.5 | 94602.77 | 9346.543 | 112722.3 |
| 407961   | 408313.8 | 18217.31 | 14440.39 | 16705.53 | 312473.8 | 392799.4 | 406381.3 | 19095.36 | 21552.72 |
| 510573.1 | 183464   | 36775.9  | 64118.28 | 30734.12 | 18068.58 | 1025125  | 635150.5 | 532008   | 263479.9 |
| 42554758 | 47183836 | 3828138  | 2398531  | 10705452 | 12329224 | 39083139 | 1.21E+08 | 842693.2 | 10848918 |
| 2.35E+08 | 2.35E+08 | 4812492  | 2040677  | 8136417  | 72438252 | 3.21E+08 | 5.75E+08 | 899590   | 1.66E+08 |
| 347014.9 | 274610.7 | 5270.992 | 3121.207 | 26323.17 | 32676.29 | 610275.5 | 319316.6 | 140193.1 | 627455.4 |
| 1737760  | 1101276  | 550011.1 | 539632.2 | 533087.5 | 1402649  | 2026097  | 3269393  | 850810.4 | 498220.3 |
| 51368.92 | 36752.49 | 50669.84 | 171745.1 | 131883   | 52163.62 | 43671.34 | 9225.424 | 55266.83 | 107515.1 |
| 738450.8 | 1005651  | 8250.929 | 4832.369 | 35745.23 | 317028.1 | 297650.8 | 206001.2 | 81744.41 | 166210.2 |
| 84382.04 | 68570.44 | 6010.644 | 8564.18  | 11581.32 | 1094627  | 1062232  | 128468.2 | 0        | 28459.09 |
| 572145.8 | 506345.9 | 6546.044 | 8616.592 | 19893.05 | 183352.9 | 883233.1 | 1026048  | 8758.893 | 131679.5 |
| 144163.7 | 133520.6 | 0        | 3109.351 | 10159.91 | 20842.17 | 225943.4 | 366797.3 | 7579.244 | 96698.12 |
| 170264.3 | 150326   | 0        | 0        | 7874.086 | 65806.29 | 257918.5 | 100670.2 | 47547.55 | 413573.1 |
| 21670922 | 24219007 | 220983.1 | 290648.1 | 8498324  | 13132451 | 12677771 | 55974640 | 1061849  | 4004731  |
| 243926.9 | 244941.1 | 96471.79 | 87612.19 | 454523   | 1144240  | 1028543  | 452431.5 | 57103.14 | 94621.95 |
| 3924446  | 5541940  | 0        | 0        | 0        | 0        | 2860708  | 13320972 | 0        | 2019802  |
| 177248.8 | 143403   | 7594.204 | 5846.765 | 176895.9 | 151240   | 81992.19 | 81589.55 | 124556.7 | 431561.4 |
| 6775755  | 7600672  | 0        | 57059.64 | 3596835  | 3268335  | 3915998  | 17944185 | 590897.1 | 2857676  |
| 801057.4 | 937798.8 | 2809.765 | 14630.54 | 434151.7 | 350367.5 | 372693.3 | 2189786  | 51789.27 | 297192.7 |
| 209834.8 | 127731.6 | 28937.24 | 22567.71 | 32753.41 | 308167.8 | 163841.6 | 234423   | 166241.2 | 64074.78 |
| 26868228 | 41277220 | 7101.355 | 0        | 53880.81 | 278274.2 | 10329274 | 99126888 | 0        | 17805929 |
| 4913280  | 5426626  | 304054.8 | 183690.2 | 1780102  | 2412499  | 3456608  | 14174748 | 201935   | 2098635  |
| 1845732  | 3082282  | 6584.518 | 0        | 0        | 4492.832 | 6432.638 | 919443.8 | 0        | 590849.4 |
| 124593.4 | 120924.1 | 67523.55 | 78258.46 | 80464.21 | 14014.37 | 15827.76 | 116787.8 | 20634.3  | 44659.53 |
| 119871.8 | 70358.95 | 4811.049 | 17047.12 | 24308.69 | 152837.1 | 127871   | 111919.8 | 23122.31 | 109794.7 |
| 7260477  | 1371660  | 4494264  | 5631606  | 6033331  | 8290207  | 6473752  | 7467234  | 5865488  | 7047582  |
| 1129374  | 1326016  | 211753.6 | 155888   | 395498   | 207194.2 | 697002.8 | 473980   | 3421279  | 1091337  |
| 213355.4 | 111499.6 | 85085.02 | 87960.15 | 369857.7 | 1024942  | 2309441  | 157200.2 | 160709.7 | 88053.75 |
| 108413.1 | 17886.46 | 102764.1 | 86720.55 | 152422.5 | 157357.2 | 316631.1 | 125578.9 | 104995.6 | 127815.2 |

|          |          |          |          |          |          |          |          |          |          |
|----------|----------|----------|----------|----------|----------|----------|----------|----------|----------|
| 22921889 | 14627927 | 4170749  | 3498520  | 4938339  | 27927779 | 22356710 | 46403101 | 12209439 | 10180189 |
| 159670.7 | 17308.53 | 165659.4 | 191101.2 | 89692.31 | 353165.4 | 566246.3 | 150607.9 | 158006.8 | 159076.8 |
| 48585636 | 51653720 | 754119.2 | 523003.5 | 1462827  | 10863514 | 64142075 | 1.33E+08 | 153580.4 | 40127834 |
| 21718580 | 23633982 | 67858.36 | 187356.5 | 11777633 | 11022312 | 13870021 | 56586869 | 2092808  | 10343829 |
| 9417073  | 7012121  | 25409407 | 19392638 | 37985406 | 1527178  | 8102827  | 18192172 | 209892.5 | 14188170 |
| 551705.8 | 378587.7 | 148149.6 | 5071.242 | 22186.56 | 64824.8  | 974739.7 | 1018391  | 347756.3 | 781695.3 |
| 28888159 | 23504997 | 801746.4 | 794249.3 | 5539946  | 14406142 | 41985283 | 34937689 | 3757232  | 11628227 |
| 992704.3 | 674255.7 | 191788.1 | 85692.91 | 339275.2 | 351810.8 | 1530448  | 1651961  | 91193.28 | 467779   |
| 1152665  | 968108.4 | 823326   | 979117.9 | 3114275  | 13002876 | 2999624  | 1172261  | 140879.4 | 418208   |
| 730012.8 | 558727.5 | 134451.5 | 187393.8 | 172801.7 | 602883.5 | 771144.2 | 415512.8 | 219773.1 | 340239   |
| 138882.6 | 164539.1 | 254550.3 | 274756.5 | 246118.9 | 402417.4 | 76036.96 | 7779.573 | 113665.7 | 92289.83 |
| 3207547  | 2894234  | 162805   | 132572.3 | 513400.7 | 2515533  | 3471806  | 2230775  | 164847.8 | 1352142  |
| 1341916  | 1023855  | 417555.6 | 313939.4 | 1422002  | 10832714 | 9098998  | 2637058  | 93415.96 | 528067.3 |
| 3844777  | 1877715  | 10630.56 | 43381.9  | 118902.7 | 298047.9 | 7767573  | 5590591  | 1464102  | 2795884  |
| 10559468 | 7995873  | 383712.6 | 147676.4 | 12963688 | 748498.4 | 10499655 | 8895285  | 1306911  | 4975043  |
| 643988.1 | 764752.4 | 0        | 29926.51 | 41876.98 | 260697.3 | 563402   | 247201.9 | 27858.64 | 261641.8 |
| 670821.9 | 990616.6 | 47130.97 | 68523.45 | 68901.9  | 127972.9 | 91100.34 | 344661.3 | 10833.76 | 487716.6 |
| 246518.9 | 279292.5 | 3121.869 | 3390.77  | 4597.943 | 176903   | 190761.6 | 709544.5 | 10835.55 | 69328.4  |
| 7178812  | 7421967  | 1229462  | 262799.6 | 452007.4 | 744600.7 | 9512658  | 18637479 | 116645.7 | 2373901  |
| 206134.1 | 211380.9 | 76749.13 | 79452.27 | 83890.41 | 118865.7 | 40769.76 | 503285.5 | 4232.029 | 0        |
| 101999.8 | 84816.04 | 0        | 0        | 0        | 91279.17 | 128566.9 | 159172.2 | 0        | 33888.05 |
| 508497.3 | 436980.2 | 42985.26 | 29190.94 | 127539.3 | 617198.8 | 318161.2 | 805344.9 | 43717.13 | 105225.4 |
| 5772382  | 6304203  | 199648.3 | 247152.1 | 689307.3 | 4257671  | 4255854  | 3321816  | 468640.1 | 1778749  |
| 3392293  | 2957589  | 204398.6 | 84851.96 | 443437.3 | 3418851  | 3253933  | 2621844  | 309186.1 | 1121742  |
| 4125577  | 3229009  | 403407.6 | 457693.6 | 969332.3 | 3886099  | 4379951  | 8107457  | 388245.6 | 1550384  |
| 309058.9 | 155698.5 | 8927.823 | 9946.208 | 3597.03  | 138074   | 574873.9 | 458017   | 54741.17 | 299172.3 |
| 141302.3 | 66213.3  | 330930   | 302158.3 | 279857.8 | 120069.7 | 59795.14 | 147229.2 | 218743.9 | 191396.8 |
| 144785.4 | 88935.65 | 74336.52 | 85112.94 | 474901.1 | 279910.6 | 361668.5 | 216238.4 | 13318.64 | 119459.5 |
| 298657.1 | 218610.5 | 5980.273 | 0        | 0        | 147103   | 498686.5 | 422390.4 | 47556.43 | 124835.3 |
| 7617217  | 1573589  | 5576245  | 7121124  | 7159469  | 5021869  | 7789619  | 10045011 | 6229526  | 6240714  |
| 695542.5 | 498246.2 | 10597.62 | 0        | 18011.83 | 419250.5 | 1122301  | 1023615  | 49813.05 | 395659.4 |
| 20776321 | 31441930 | 232734.6 | 114925.8 | 51857.58 | 563254.8 | 9301658  | 75713731 | 4065.15  | 15395821 |
| 667612.9 | 660295.4 | 417924.2 | 504722.4 | 1955548  | 7745755  | 1778225  | 698820.7 | 47984.81 | 81049.15 |
| 638332.8 | 504082.8 | 208357.3 | 83995    | 296244.2 | 635639.7 | 411827.1 | 575238.6 | 266804.3 | 194217.9 |
| 228771.4 | 253182.9 | 10146.21 | 5008.584 | 9980.087 | 172959   | 173722.1 | 360012.6 | 11459.86 | 96517.28 |
| 11726994 | 17789890 | 71674.71 | 78217.39 | 0        | 176810.5 | 5384752  | 42851346 | 0        | 6536013  |
| 359114.5 | 282218.1 | 0        | 2291.36  | 0        | 53744.91 | 644783.7 | 481262   | 26699.74 | 197393.3 |
| 343000.9 | 110085.1 | 625544.7 | 582805.9 | 569791.7 | 207299.8 | 327709.6 | 483166.6 | 396126.8 | 331873.9 |
| 1041084  | 1023507  | 114544.9 | 145777.8 | 188655.4 | 818379.6 | 818257.5 | 446576.3 | 125448.6 | 366040.3 |
| 972762   | 1210327  | 2379.831 | 6691.611 | 244455.7 | 576086.3 | 417967.9 | 2130490  | 9084.72  | 47762.92 |
| 934209.1 | 1092445  | 12097.03 | 3784.919 | 20422.95 | 183718   | 1081255  | 2788839  | 18703.82 | 347213.2 |
| 2312693  | 3352878  | 460603.4 | 470194.5 | 380630.4 | 66892.52 | 259586.6 | 153178.1 | 7919574  | 2970916  |
| 1.03E+09 | 7.11E+08 | 1.67E+08 | 97269157 | 4.67E+08 | 2.16E+08 | 1.61E+09 | 1.93E+09 | 3.08E+08 | 3.31E+08 |
| 940333.9 | 1398635  | 111878.1 | 106632.7 | 150966.9 | 44856.83 | 149637.5 | 125081.4 | 3347959  | 996579.6 |
| 49481.07 | 41490.54 | 45975.77 | 39699.39 | 122600.3 | 570372.6 | 127828.9 | 79429.49 | 7217.928 | 35134.46 |
| 300113   | 318601.6 | 0        | 0        | 10908.73 | 39694.28 | 424370.9 | 492932.4 | 27626.87 | 189370.3 |
| 2180159  | 1309679  | 152691.6 | 140497.9 | 373872.2 | 2510952  | 2676389  | 2344690  | 485163.2 | 1236709  |

|          |          |          |          |          |          |          |          |          |          |
|----------|----------|----------|----------|----------|----------|----------|----------|----------|----------|
| 240088.5 | 100239.2 | 114466   | 31485.57 | 52658.62 | 369656.8 | 169025.5 | 372892.7 | 161394.7 | 121933.1 |
| 47549.16 | 41292.86 | 8379.749 | 15837.54 | 62935.94 | 1334342  | 4333157  | 29102.29 | 36906.5  | 33621.82 |
| 829637.1 | 598692.8 | 55120.63 | 68729.59 | 130504.5 | 266514.8 | 1379396  | 1632733  | 16056.52 | 786002.1 |
| 999171.2 | 1363357  | 333120.1 | 2641180  | 1957478  | 15035487 | 2769507  | 715794   | 5732.547 | 111836.1 |
| 3696102  | 2319743  | 705577.1 | 745854.2 | 1186481  | 3627756  | 4289734  | 2891504  | 1043218  | 2354111  |
| 2719408  | 1531072  | 554671.6 | 345345.1 | 645390.8 | 4344691  | 1535286  | 3343903  | 1214966  | 963823.3 |
| 531537.4 | 318642.4 | 73720.82 | 45805.52 | 90111.25 | 314388   | 857268.5 | 692715.2 | 63804.64 | 342148.7 |
| 421270.7 | 155051.6 | 88645.41 | 123245.9 | 191702.3 | 668388.1 | 258798.5 | 282975.1 | 614583.4 | 563459.6 |
| 5710214  | 5254049  | 12428.46 | 7390.705 | 77703.72 | 5687680  | 5791422  | 6803914  | 92280.48 | 874908.5 |
| 73492.33 | 30222.55 | 79061.18 | 106746.7 | 72778.15 | 182325.7 | 78134.23 | 68849.28 | 54534.71 | 98252.5  |
| 6851761  | 11090812 | 0        | 0        | 0        | 0        | 1501712  | 26290496 | 0        | 5383882  |
| 354768.4 | 268099.3 | 162064.7 | 320879.6 | 966575.4 | 613801.8 | 948040.8 | 227938.3 | 43573.31 | 602969.8 |
| 438284.9 | 360458.4 | 65002.77 | 122191.6 | 115039.7 | 313300.7 | 457954.9 | 311710.4 | 150374.4 | 93393.41 |
| 2.51E+08 | 4.17E+08 | 1800302  | 4390867  | 8951119  | 3249759  | 4739139  | 9.66E+08 | 800938.2 | 2.81E+08 |
| 792623.9 | 805891.1 | 817061.5 | 2100167  | 4944268  | 649271.1 | 998019   | 2102221  | 4952.138 | 434838.5 |
| 196674.5 | 216245.9 | 0        | 0        | 0        | 153597.8 | 167411   | 524619.2 | 0        | 0        |
| 185925.8 | 209856.2 | 3237.396 | 0        | 0        | 0        | 258931.3 | 262014.2 | 18761.8  | 128532.4 |
| 2893209  | 2426134  | 195645.7 | 165083.4 | 468468.3 | 3017207  | 2787670  | 2322416  | 318252.5 | 969101.8 |
| 2387279  | 2168044  | 419506.9 | 598405.2 | 739079.9 | 1800006  | 1849589  | 1388321  | 604883.5 | 1097662  |
| 332725.8 | 258005   | 222866.6 | 245704.2 | 248516.7 | 131382.8 | 32348.95 | 214516   | 78000.26 | 167846.7 |
| 77929.18 | 60153.4  | 37525.47 | 49316.87 | 82342.03 | 425707.6 | 350911.4 | 162819.6 | 59386.63 | 47538.24 |
| 1601944  | 341096.6 | 927263.3 | 1147613  | 1185457  | 1854420  | 1533577  | 1800967  | 1222672  | 1406514  |
| 3153715  | 3542518  | 631150.5 | 347567.6 | 1367059  | 94947.97 | 2695102  | 8943818  | 20702.39 | 3981617  |
| 506051.3 | 466568.9 | 0        | 3618.842 | 80284.57 | 372511.3 | 586790.7 | 383613.9 | 18500.72 | 164237.8 |
| 837175.5 | 646067.8 | 62015.4  | 47069.19 | 205242.6 | 885347.2 | 855501.8 | 774150.9 | 117498.6 | 360717.8 |
| 12832298 | 8732280  | 1855671  | 2095019  | 3451614  | 19069210 | 6757838  | 12458278 | 2413758  | 6331046  |
| 1389496  | 1665172  | 139564.6 | 141274.3 | 484321.1 | 572372.7 | 683117.5 | 4028024  | 88932.03 | 287033.1 |
| 165764.3 | 214738.3 | 327207.3 | 939240.4 | 3685321  | 207127   | 119530.2 | 529493.5 | 0        | 160123.4 |
| 146798.8 | 114396.8 | 166930.3 | 94898.17 | 366588.9 | 1360453  | 283044.5 | 112162.4 | 34587.56 | 51142.22 |
| 284365.4 | 266309   | 195135.8 | 139908   | 312966.8 | 1268103  | 1416113  | 434674.3 | 149834.7 | 73673.74 |
| 91921.39 | 48731.41 | 113384.8 | 70429.23 | 125313.7 | 159195.2 | 158196.4 | 131982.5 | 45327.95 | 154649.3 |
| 3791654  | 3993510  | 144699.5 | 142655.9 | 501246.5 | 2923585  | 3112738  | 2424489  | 227825.7 | 1120839  |
| 76532.19 | 55512.59 | 79312.76 | 52390.62 | 158640   | 978104.2 | 250639.9 | 126919   | 9463.226 | 28335.93 |
| 49379.25 | 68169.56 | 0        | 5800.254 | 44514.25 | 2085232  | 6925085  | 13998.18 | 9373.405 | 12078.56 |
| 103606.3 | 88906.72 | 12117.89 | 0        | 14664.67 | 91868.13 | 113747.7 | 240506.9 | 12640.53 | 37479.55 |
| 8449832  | 13500768 | 0        | 0        | 528329.2 | 0        | 1980702  | 31941690 | 0        | 7693019  |
| 27068101 | 27818189 | 1394343  | 1231675  | 3443732  | 21060609 | 23378025 | 16486136 | 2491310  | 8888187  |
| 39822785 | 51928354 | 3159865  | 1955564  | 2387664  | 4612919  | 32320693 | 1.3E+08  | 922627.5 | 27240474 |
| 3233716  | 2977271  | 164046.5 | 17340.09 | 1453201  | 2395462  | 2977546  | 5159343  | 351231   | 423884.2 |
| 1514564  | 2128020  | 6663.344 | 4432.272 | 17933.68 | 321058.2 | 926195.4 | 1017623  | 30228.56 | 1016028  |
| 420876.9 | 152174.9 | 755419.1 | 695331.1 | 541448.3 | 350687.9 | 398077.6 | 492734.6 | 462102.3 | 415591.7 |
| 220420.9 | 251690.9 | 105844.2 | 100528.4 | 78519.66 | 30514.07 | 44612.12 | 115609.9 | 17193.43 | 49179.24 |
| 7.05E+08 | 1.56E+09 | 7.5E+08  | 4.16E+08 | 2.06E+09 | 1.81E+09 | 5.03E+09 | 12651445 | 4769422  | 2163959  |
| 181743.8 | 201032.9 | 19186.29 | 46522.88 | 47652.29 | 38387.75 | 157359.7 | 534327.4 | 29946.11 | 105093.7 |
| 196853.3 | 101017.7 | 236745.4 | 273754.8 | 269478.8 | 160733.4 | 416414   | 171404.5 | 121844.6 | 92548.73 |
| 322724.5 | 273152.6 | 74759.24 | 83142.95 | 422037.6 | 3995146  | 11542868 | 203479.2 | 55527.87 | 125186.2 |
| 10079180 | 8245791  | 231082.3 | 119357.8 | 569006.9 | 2244771  | 17168079 | 20741012 | 29719.46 | 14260883 |

|          |          |          |          |          |          |          |          |          |          |
|----------|----------|----------|----------|----------|----------|----------|----------|----------|----------|
| 1147805  | 741184.6 | 179984.1 | 85461.95 | 392986.9 | 508172   | 1807211  | 1808561  | 182793.4 | 530510.2 |
| 11232720 | 14077174 | 0        | 3921.882 | 0        | 451679   | 12815224 | 33019370 | 35455.9  | 4877334  |
| 1117102  | 1896193  | 5475.167 | 4918.735 | 4015.255 | 0        | 6806.655 | 13400.9  | 4468792  | 727234.1 |
| 552753   | 648006.6 | 4629.331 | 10764.52 | 40314.25 | 277671.7 | 484882.3 | 309487.9 | 16884.97 | 151694.2 |
| 1.13E+08 | 1.57E+08 | 5982646  | 11737752 | 46837220 | 19086164 | 20554833 | 3.78E+08 | 2407706  | 19507195 |
| 2743875  | 3000370  | 94436.34 | 118975.2 | 535821.2 | 1466326  | 2476973  | 7683531  | 183618.9 | 819918.5 |
| 8636033  | 12665150 | 113084.8 | 36065.27 | 0        | 421389.2 | 5226373  | 30665399 | 0        | 5678783  |
| 8793248  | 13924563 | 7196.362 | 0        | 0        | 45806.04 | 2997004  | 33257001 | 0        | 5510135  |
| 125159.9 | 79267.89 | 22545.32 | 0        | 20945.65 | 230516.2 | 9828.158 | 244871.4 | 37000.11 | 108694.7 |
| 353703.5 | 402428.7 | 695101.5 | 1414630  | 3300532  | 106546   | 185673.8 | 939369.3 | 38593.41 | 603975.4 |
| 9042746  | 14344460 | 28759.9  | 30299.84 | 0        | 97522.42 | 2929754  | 34255577 | 23404.82 | 5218535  |
| 4231633  | 4525878  | 156223.7 | 165781.4 | 514845   | 2551328  | 4049142  | 2741064  | 389641.9 | 1291891  |
| 1602835  | 1776533  | 2602122  | 575720.8 | 10698379 | 416352.4 | 7583004  | 4759898  | 1002653  | 832233.2 |
| 323759.7 | 436750.9 | 57369.43 | 40719.09 | 211568.8 | 5170203  | 14360090 | 1088944  | 42331.74 | 47024.53 |
| 1173458  | 1281287  | 13771.74 | 24409.45 | 96948.41 | 604132.5 | 1225564  | 792348.4 | 92892.05 | 346274.6 |
| 1189734  | 1555839  | 20232.07 | 42573.92 | 164202.9 | 94114.83 | 1001689  | 3875343  | 0        | 245025   |
| 2661843  | 456896.2 | 1144557  | 2358152  | 2445815  | 2946267  | 2213745  | 2623202  | 2230996  | 2210614  |
| 3349321  | 4751353  | 21780.84 | 0        | 146301.2 | 453689.2 | 2110257  | 11325409 | 4178388  | 591173.1 |
| 2231999  | 3457375  | 87421.25 | 149526.8 | 143801.6 | 146348   | 499724.9 | 8333760  | 369012.2 | 283446.6 |
| 600876.6 | 392806.8 | 131082.6 | 61322.62 | 345648   | 166761.8 | 894344.6 | 503480.3 | 0        | 996674.3 |
| 17807696 | 27866344 | 0        | 0        | 0        | 704077.1 | 6581901  | 66624134 | 0        | 13418440 |
| 19102618 | 26232004 | 1369722  | 1232479  | 6891898  | 1720901  | 7304342  | 13447554 | 973651.3 | 3265914  |
| 284859   | 262072.4 | 49338.02 | 31750.72 | 69058.69 | 97510.44 | 358071.1 | 684445.8 | 68998.72 | 31028.8  |
| 2755081  | 2247299  | 48401.59 | 36626.81 | 115217.1 | 594335.8 | 4747099  | 5871767  | 0        | 3526231  |
| 346915.4 | 298681   | 49316.16 | 54009.91 | 63626.51 | 309616.6 | 332211.2 | 194248.4 | 46749.21 | 162778.2 |
| 20140013 | 30871379 | 92118.95 | 113198.5 | 0        | 412644.2 | 9473364  | 74181046 | 0        | 14554289 |
| 5692180  | 9080090  | 451096.4 | 444894.3 | 406191.8 | 290826.9 | 307087   | 367545.5 | 21458196 | 5529838  |
| 5974818  | 8315724  | 0        | 0        | 14099.56 | 148784.2 | 5031219  | 19989587 | 0        | 2897912  |
| 1657697  | 2215987  | 18649.23 | 58700.56 | 218657.4 | 367367.4 | 1095836  | 5551146  | 48809.27 | 589124   |
| 7061894  | 894265.2 | 4439780  | 5796941  | 6723515  | 6517655  | 7717925  | 6804774  | 5695992  | 7093946  |
| 406781   | 516048.5 | 0        | 0        | 0        | 87118.76 | 400995.4 | 1281155  | 4659.064 | 115444.4 |
| 32268909 | 51079972 | 45706.11 | 4521.644 | 0        | 383539.4 | 11365366 | 1.22E+08 | 0        | 19110802 |
| 270985.7 | 342527.8 | 66934.65 | 0        | 0        | 78846.83 | 197170.3 | 844100.4 | 0        | 21592.51 |
| 53058.72 | 47404.17 | 3373.381 | 0        | 48082.61 | 460140   | 518896.5 | 129804.4 | 0        | 37784.59 |
| 469119.8 | 231693.1 | 6398.227 | 16703.55 | 16131.99 | 525124.9 | 684684   | 590386   | 284507.3 | 672741.1 |
| 2160581  | 1630147  | 16083.74 | 10545.32 | 823874.5 | 1910654  | 2599366  | 2323637  | 995141.5 | 2037852  |
| 8037794  | 11493664 | 0        | 70951.35 | 0        | 83309.98 | 6101770  | 27435161 | 0        | 3372548  |
| 188673.3 | 174832.6 | 25776.25 | 19697.29 | 33902.92 | 167969.2 | 162486.2 | 461790.5 | 0        | 80117.09 |
| 30166369 | 45715004 | 430111.7 | 154235.5 | 629930.8 | 246553.5 | 15393465 | 1.1E+08  | 0        | 16639191 |
| 4841558  | 1417585  | 3455792  | 4158190  | 4268374  | 3382927  | 4662166  | 7194540  | 3586218  | 3901832  |
| 65619.24 | 43536.94 | 26272.54 | 5679.333 | 54067.4  | 475925.8 | 539769.8 | 91899.94 | 15724.72 | 65825.22 |
| 171041.9 | 94726.27 | 81998.1  | 133147.1 | 205313.8 | 1496092  | 683512.1 | 119215.2 | 77564.38 | 309036.9 |
| 368556.5 | 514479.2 | 3647.453 | 0        | 0        | 9419.12  | 308932.9 | 335580.3 | 5924.045 | 130411.7 |
| 883613.1 | 1523270  | 890688.4 | 59302827 | 18542254 | 1759.962 | 211952   | 175499.9 | 0        | 679966.9 |
| 988026.4 | 191571.3 | 675428.9 | 951442.2 | 951180.8 | 951892.6 | 783290.8 | 995539.5 | 718607.6 | 919341.1 |
| 216783   | 240939.8 | 79429.56 | 2432.085 | 0        | 63368.48 | 216157.6 | 609306.1 | 58213.48 | 9397.322 |
| 1202305  | 556413.1 | 796026.5 | 961044.5 | 937289.1 | 1009487  | 666878.9 | 2029413  | 750555.7 | 629222.6 |



|          |          |          |          |          |          |          |          |          |          |
|----------|----------|----------|----------|----------|----------|----------|----------|----------|----------|
| 1372592  | 2131571  | 230961.6 | 169770.5 | 198667.3 | 22379.41 | 34179.13 | 59355.4  | 5021299  | 1531677  |
| 9753222  | 15760606 | 20718.81 | 47213.36 | 68342.74 | 30040.02 | 2683669  | 37457651 | 0        | 7374888  |
| 8547432  | 12427121 | 24925.71 | 37953.24 | 2588071  | 242325.4 | 3555837  | 30194685 | 0        | 5508416  |
| 803248.1 | 860437.5 | 26037.99 | 18071.75 | 75268.63 | 647076.6 | 657453.7 | 446668.2 | 58037.7  | 246133.5 |
| 11408943 | 18572496 | 6347.578 | 0        | 0        | 80575.68 | 2907560  | 44040113 | 0        | 8345867  |
| 1429493  | 1657797  | 56944.45 | 58847.63 | 71411    | 837126.9 | 1193023  | 521283.8 | 63579.24 | 584830.8 |
| 18262688 | 26777633 | 89551.84 | 5176.987 | 95613.99 | 132997.1 | 12506771 | 64872613 | 0        | 12202925 |
| 14505711 | 21108311 | 126970.5 | 43231.14 | 900743.4 | 1281947  | 8496264  | 51433725 | 23392.64 | 5639505  |
| 4541675  | 7444111  | 15846.2  | 2849.829 | 22377.37 | 0        | 1026517  | 17678820 | 0        | 2894027  |
| 5477332  | 6033843  | 74623.17 | 98197.9  | 1112663  | 5301292  | 2740116  | 14998998 | 268842.8 | 916868.9 |
| 8634845  | 13130681 | 504707.7 | 296267.8 | 1080905  | 647594.3 | 2470240  | 31803791 | 0        | 5739363  |
| 477356.6 | 402542.9 | 131863.3 | 130649.7 | 81936.42 | 86445.05 | 663614.2 | 288937.1 | 32656.19 | 362193.9 |
| 445237.9 | 195959.1 | 260682.1 | 310670.5 | 325511.5 | 358849.5 | 393752.2 | 679918.1 | 270839.1 | 279333.6 |
| 263070.8 | 221943.3 | 2756.347 | 0        | 3456.008 | 302809.8 | 270653.4 | 449681.6 | 17177.44 | 379291.5 |
| 125439   | 114326.4 | 81895.49 | 105866.6 | 391441.9 | 1756896  | 326716.7 | 155388.1 | 4849.929 | 40531.03 |
| 237185.6 | 99307.11 | 371195.4 | 199077.8 | 586539.8 | 471014.1 | 138224.6 | 345578.8 | 134995.1 | 296287.4 |
| 38425790 | 60918525 | 5167.034 | 8407.479 | 379981.4 | 269850.8 | 14331117 | 1.46E+08 | 0        | 21599750 |
| 14311369 | 21829309 | 105036.7 | 18402.23 | 354469.5 | 474003.9 | 7030292  | 52572858 | 10290.83 | 7473924  |
| 550902.1 | 539397.3 | 0        | 0        | 12687.22 | 597872.1 | 459926.4 | 1255976  | 0        | 13357.84 |
| 18984576 | 29906108 | 57699.07 | 46422.67 | 254766.2 | 248448.6 | 7372711  | 71529016 | 0        | 11345311 |
| 368374.6 | 485947.6 | 0        | 0        | 6609.007 | 91216.76 | 311872.1 | 220056.1 | 0        | 65353.98 |
| 531245   | 283495.3 | 343582.5 | 308585.3 | 486036   | 2731509  | 2180415  | 755645.8 | 151683.1 | 318992.5 |
| 13520949 | 21863770 | 27616.27 | 0        | 102374.4 | 157903.7 | 3845638  | 51986074 | 0        | 8718946  |
| 8465044  | 1651589  | 6089474  | 6580013  | 6506293  | 9881444  | 7238565  | 8946372  | 6855167  | 7815751  |
| 1069851  | 1146371  | 187521.1 | 272926.9 | 288109.3 | 614078.3 | 641488.2 | 393566.7 | 197710.2 | 353149.9 |
| 565774.3 | 209355.9 | 140853.3 | 99332.94 | 213643.6 | 304253.2 | 955241.7 | 511687.4 | 300680.8 | 804355   |
| 1366454  | 804281.3 | 16824.7  | 4006.037 | 99867.46 | 800818   | 2400489  | 1898659  | 217254.9 | 864637.5 |
| 7205422  | 10418300 | 0        | 0        | 0        | 0        | 5497888  | 24919933 | 0        | 3141655  |
| 10332702 | 16825474 | 15786.28 | 0        | 52259.04 | 175507.5 | 2629449  | 39907180 | 18303.89 | 7495928  |
| 52470038 | 33639513 | 6816973  | 1906260  | 37398424 | 5105750  | 82393753 | 69578145 | 9757915  | 23650185 |
| 320048.1 | 357760.7 | 0        | 0        | 0        | 119615.7 | 387737.9 | 916821.5 | 5968.895 | 198279.1 |
| 825393.4 | 466414   | 277653.8 | 271350.5 | 358526.4 | 753106.8 | 948352.7 | 1588408  | 398665.5 | 532175.1 |
| 172338.1 | 98952.81 | 43206.17 | 55040.53 | 27473.86 | 212549.5 | 174052.3 | 218642.4 | 33021.19 | 106943.7 |
| 200816.7 | 147042.9 | 9380.81  | 23368.36 | 18324.19 | 184714.6 | 263337.9 | 247229.4 | 5864.11  | 164936.6 |
| 265787.6 | 220819   | 4472.087 | 10763.26 | 8862.643 | 128523.9 | 415919.2 | 543930.1 | 18340.19 | 147411.7 |
| 1308325  | 637264.8 | 14907.89 | 73765.03 | 16639.52 | 10409.31 | 2705997  | 2085895  | 588133   | 1001850  |
| 1953048  | 1053068  | 3128135  | 1424430  | 6756728  | 1231186  | 4115913  | 2850674  | 187960   | 2170689  |
| 11532392 | 18797865 | 724231.5 | 343363.3 | 1106576  | 350774.8 | 758510   | 250308.4 | 2740895  | 10275730 |
| 18410768 | 24318793 | 222454.4 | 93478.67 | 333333.1 | 678342.1 | 18629893 | 57878608 | 0        | 7546142  |
| 47607.7  | 39209.6  | 104804.6 | 33599.94 | 52653.6  | 321961.5 | 72970.45 | 43468.12 | 0        | 24507.78 |
| 8847525  | 6154152  | 65024.56 | 45815.42 | 386897.8 | 1206911  | 16826717 | 14619221 | 528301.2 | 4326333  |
| 110414.7 | 123364   | 2654.023 | 0        | 131755.2 | 0        | 42525.27 | 228211.7 | 0        | 68904.12 |
| 33235331 | 51520712 | 6491.015 | 0        | 461625.5 | 219618.5 | 16074621 | 1.24E+08 | 4388.413 | 18279136 |
| 138812.5 | 85997.54 | 3165.726 | 15232.31 | 33848.7  | 174612.3 | 151346   | 159531.3 | 47395.26 | 59946.4  |
| 7808834  | 8341153  | 563146.7 | 67353.61 | 1182489  | 2033649  | 9723597  | 21063276 | 264373.5 | 1652234  |
| 966309.4 | 448605.8 | 3256.428 | 2672.2   | 17021.34 | 10913.72 | 2026780  | 1472568  | 279856   | 894855.2 |
| 107297.2 | 86912.39 | 53925.5  | 67404.13 | 67876.02 | 34675.8  | 60370.77 | 91357.01 | 48497.52 | 22592.83 |

|          |          |          |          |          |          |          |          |          |          |
|----------|----------|----------|----------|----------|----------|----------|----------|----------|----------|
| 234810   | 164817.9 | 38870.71 | 8756.252 | 76064.23 | 208019.4 | 292511.5 | 370597.3 | 38094.41 | 97887.59 |
| 470224.6 | 353688.2 | 214171.3 | 54395.49 | 288498.1 | 3487377  | 3992996  | 1011895  | 39037.73 | 328228.2 |
| 4590490  | 7933994  | 2866.101 | 7928.181 | 4053.852 | 0        | 35121.02 | 79676.81 | 18651537 | 2728525  |
| 15189507 | 23170187 | 4370.077 | 4105.939 | 2051420  | 208971.5 | 6610401  | 55777795 | 0        | 11016973 |
| 2693962  | 2892801  | 257136.5 | 141726.4 | 84905.53 | 1828746  | 2511739  | 1523124  | 2380090  | 7656582  |
| 1763753  | 1121102  | 18430.27 | 11256.19 | 53212.61 | 1037337  | 3063365  | 2852711  | 661974.3 | 1891153  |
| 610901   | 526595   | 47276.73 | 52192.04 | 87924.87 | 628897.9 | 587218.8 | 431186.2 | 56349.04 | 278005.6 |
| 1103398  | 664660.9 | 221973.9 | 67970.86 | 935931.5 | 150933.6 | 1622465  | 1419059  | 105374.5 | 791957.3 |
| 183069.1 | 141668.1 | 24476.04 | 19872.69 | 45860.55 | 71597.21 | 276137.8 | 402620.2 | 45176.68 | 128218.3 |
| 1836135  | 1175733  | 257259.3 | 320768.8 | 207554.1 | 439749   | 3240070  | 2928579  | 179573   | 1033921  |
| 13797001 | 9105089  | 2994352  | 2159017  | 3448062  | 16722151 | 13193359 | 28526296 | 7051357  | 6052014  |
| 974386.3 | 815988.4 | 280633.6 | 312233.5 | 294338.7 | 547401.3 | 1005402  | 2259746  | 186573.6 | 355761.8 |
| 16602668 | 26057200 | 30052.21 | 2580.975 | 448873   | 413452.5 | 6788981  | 62367264 | 7248.764 | 11074110 |
| 864243.9 | 1150771  | 253992.8 | 259986.7 | 276272.7 | 158795   | 49339.05 | 20717.62 | 2629251  | 1444029  |
| 3331179  | 1928758  | 706050.1 | 738662.9 | 4655866  | 1289789  | 2460004  | 3605038  | 181032.7 | 3246914  |
| 100370.6 | 82632.37 | 0        | 6850.198 | 10743.57 | 0        | 179821   | 150467.4 | 38516.26 | 86937.4  |
| 202401.7 | 65630.7  | 264468.9 | 172528.7 | 685358.8 | 97146.52 | 510741.9 | 273217.1 | 99227.53 | 216123.5 |
| 22882595 | 34989386 | 84648.39 | 0        | 420083.1 | 177540   | 12394678 | 84079572 | 0        | 15050138 |
| 4552382  | 911309.5 | 3045740  | 3535706  | 3572419  | 5178342  | 4160033  | 4899467  | 3483257  | 3923685  |
| 94334.93 | 65546.69 | 33965.11 | 13522.08 | 148067.5 | 935719.6 | 468997.6 | 169296.3 | 12424.92 | 48389.68 |
| 3711983  | 3292021  | 332339   | 53321.95 | 85081.49 | 283576.5 | 6332806  | 8895735  | 947479.4 | 3435081  |
| 42416.49 | 34848.04 | 5702.294 | 6945.91  | 99207.59 | 971745.2 | 301732.8 | 55329.47 | 0        | 20116.4  |
| 29815400 | 46481293 | 816064.8 | 736692.7 | 12037875 | 258867.2 | 1001271  | 1.11E+08 | 0        | 13513171 |
| 1357622  | 936554.5 | 15433.02 | 2942.253 | 229570.7 | 552044.5 | 2354440  | 1825901  | 111549.8 | 648168.8 |
| 14559589 | 22849856 | 87760.25 | 3170.96  | 0        | 13479.04 | 6659573  | 54668352 | 0        | 10060806 |
| 9714805  | 1698032  | 7194343  | 9508019  | 9907274  | 6061753  | 9488777  | 12225476 | 8583253  | 7883761  |
| 71043415 | 75458923 | 1885735  | 1131185  | 14454695 | 12931286 | 92855054 | 1.83E+08 | 0        | 12207618 |
| 3900268  | 4360467  | 35017.18 | 13464.14 | 248169.2 | 1002151  | 4917651  | 11151888 | 1007760  | 1993174  |
| 209643.1 | 126057.2 | 0        | 0        | 21466.86 | 2200228  | 3235857  | 200025.6 | 417558.4 | 87814.59 |
| 1920196  | 2102094  | 1509934  | 4513836  | 10849199 | 1130300  | 3703865  | 5510432  | 98739.22 | 1293914  |
| 1109580  | 1213358  | 7663.154 | 9902.707 | 138619.1 | 594981.4 | 1163077  | 751364.8 | 94382.55 | 323173.5 |
| 12247702 | 19410051 | 111230.9 | 64481.75 | 378708.3 | 249829.7 | 4456931  | 46466942 | 0        | 6962676  |
| 2327747  | 2395820  | 4782.449 | 2930.892 | 11962.59 | 1258052  | 2939647  | 6269276  | 187731.2 | 1591360  |
| 13873693 | 6808906  | 147190.3 | 261225.7 | 755521.8 | 1748031  | 28187947 | 20392282 | 5353430  | 9796351  |
| 380866.5 | 192374.5 | 53528.64 | 25680.69 | 70298.08 | 223857.6 | 656124.9 | 512436.3 | 200972.8 | 166481.7 |
| 1118931  | 1730455  | 188572   | 238053.1 | 167589.7 | 0        | 19538.46 | 5980.611 | 4035456  | 1389410  |
| 3842187  | 3663457  | 35330.2  | 47995.66 | 0        | 112393   | 6526223  | 8475687  | 4154.151 | 3627688  |
| 324826.8 | 338298.8 | 10813.28 | 33141.68 | 15491.53 | 81193.62 | 437138.8 | 261962.8 | 13930.25 | 127571.9 |
| 2109422  | 2504891  | 65263.27 | 48465.53 | 56850.49 | 438965.1 | 2441672  | 3230778  | 548492.5 | 661125.8 |
| 5556861  | 8869149  | 49556.55 | 51287.5  | 152722.4 | 563858.4 | 1449278  | 20884370 | 171832.8 | 813683.3 |
| 132184.1 | 30182.29 | 35156.96 | 66264.58 | 156405.4 | 1389862  | 4434073  | 80382.22 | 148085.1 | 145154.7 |
| 510378.3 | 432522.7 | 128192.7 | 103353.4 | 63547.3  | 627807   | 292128.1 | 921103.6 | 45790.68 | 40217.41 |
| 1023923  | 706464.2 | 280218.3 | 59772.69 | 430504.9 | 257823.5 | 1597257  | 2120236  | 339275.5 | 550970.1 |
| 272157.3 | 224561.9 | 2581.05  | 2685.775 | 54858.59 | 171912.3 | 386133   | 347208.7 | 31143.38 | 130954.1 |
| 315657.2 | 264732.5 | 296254.6 | 302158.8 | 858331.1 | 1338179  | 262849.5 | 424133.2 | 21443.97 | 129599.1 |
| 4855094  | 5249475  | 713664.9 | 1121529  | 1179841  | 2897450  | 3141550  | 2369303  | 1125996  | 1963392  |
| 8693151  | 13932492 | 0        | 0        | 86800.16 | 30957.16 | 3244537  | 33181814 | 0        | 5695588  |

|          |          |          |          |          |          |          |          |          |          |
|----------|----------|----------|----------|----------|----------|----------|----------|----------|----------|
| 451192.8 | 260388.3 | 41272.76 | 18939.19 | 65915.48 | 561135.7 | 548527.1 | 476050.4 | 24509.03 | 460049.4 |
| 540452.1 | 325230.1 | 0        | 8678.98  | 34153.29 | 731145.3 | 625407.8 | 672064.4 | 52997.27 | 503641.7 |
| 13176901 | 10683340 | 1896406  | 1045720  | 3155759  | 2053147  | 21165641 | 25772836 | 265716.5 | 6862375  |
| 19147734 | 31237972 | 0        | 4383.101 | 0        | 86311.09 | 5874596  | 74220736 | 3671.822 | 11323383 |
| 230621.1 | 164046.5 | 117239.1 | 82876.8  | 445277.8 | 2745370  | 948253.2 | 362004.8 | 94825.72 | 109030.9 |
| 291180.6 | 118808.2 | 269712.2 | 307772.7 | 248648.7 | 123782.8 | 107450.4 | 408223.7 | 113253   | 233442.6 |
| 8E+08    | 1.2E+09  | 1.2E+08  | 90466770 | 69576778 | 3709562  | 2.61E+08 | 7.23E+08 | 11687556 | 41103778 |
| 442023.8 | 219092.9 | 127710   | 78584.78 | 247673.5 | 290811.3 | 639907.5 | 719635.6 | 135751.7 | 355986.2 |
| 11866383 | 19382663 | 15660.18 | 0        | 0        | 145482.5 | 3556365  | 45949159 | 0        | 8413501  |
| 38878339 | 65841604 | 105516.8 | 72496.8  | 1132861  | 3422645  | 965394.4 | 1.56E+08 | 85083.08 | 14250739 |
| 584302.3 | 568413.9 | 0        | 5093.258 | 107447.6 | 720725   | 336878.9 | 285625.2 | 0        | 246818.7 |
| 391618.6 | 243024.9 | 66721.18 | 104085.5 | 107536.8 | 283775   | 553778.4 | 318252.4 | 182792.2 | 210364.3 |
| 2012626  | 1049897  | 141573.6 | 603415.8 | 352751   | 2777959  | 2034790  | 2150097  | 542810.3 | 1411961  |
| 11928572 | 19473332 | 21807.11 | 3466.614 | 0        | 248759.3 | 3552509  | 46168362 | 0        | 8519215  |
| 10465241 | 12498019 | 1475618  | 1706558  | 2235446  | 5133524  | 5809625  | 4829651  | 2103315  | 4074574  |
| 26948359 | 26396368 | 388427.9 | 798079.8 | 1217993  | 11655215 | 37572214 | 70111322 | 455592.8 | 18303607 |
| 843367.3 | 1081045  | 283360.2 | 283776.9 | 256955.9 | 138635.2 | 158610   | 73254.18 | 2568612  | 1238831  |
| 12019462 | 18587027 | 65594.58 | 12014.63 | 339361   | 74993.08 | 6212988  | 44608555 | 0        | 7078196  |
| 4835027  | 6985324  | 8725.986 | 16186.97 | 0        | 44068.52 | 3880588  | 16771041 | 0        | 2400447  |
| 517302.4 | 251105.4 | 252611.6 | 101830.8 | 329635.6 | 155049.7 | 775092.6 | 734604   | 208746.9 | 287918.3 |
| 82489489 | 88614304 | 4771004  | 3829675  | 11092933 | 61923157 | 69646809 | 46415108 | 8025542  | 27961065 |
| 8279975  | 13328486 | 2252.274 | 0        | 10608.63 | 61417.16 | 3169050  | 31530078 | 5319.743 | 7342111  |
| 636154.9 | 494388.2 | 113558.7 | 86077.58 | 98398.31 | 606557.1 | 711191.5 | 1272337  | 182319   | 88280.24 |
| 1202330  | 949495   | 88948.34 | 48387.32 | 185783.1 | 1293606  | 1311723  | 981804.4 | 186026.6 | 459941.3 |
| 684118   | 445463.3 | 10448.04 | 15191.4  | 18295.26 | 64492.72 | 1345282  | 691529.4 | 103464.9 | 845770.6 |
| 282802.9 | 300168.3 | 7530.505 | 8612.827 | 49072.89 | 97496.42 | 346211.6 | 781710.7 | 21974.95 | 78782.83 |
| 71441.5  | 41317.43 | 4689.337 | 0        | 0        | 23476.75 | 137021.3 | 95410.56 | 0        | 83150.09 |
| 7775250  | 9657571  | 740573.1 | 221080.2 | 1536513  | 1135068  | 7157223  | 24231465 | 87172.75 | 3632282  |
| 22875.1  | 12888.56 | 128990.5 | 34533.5  | 184435.4 | 1305062  | 21489.91 | 9254.238 | 24918.19 | 34564.33 |
| 1094437  | 843391.1 | 79322.8  | 91398.14 | 265711.9 | 1184257  | 1141105  | 987853.5 | 186597.6 | 392405.6 |
| 8123403  | 13500150 | 0        | 0        | 0        | 0        | 2051328  | 31841310 | 0        | 6250863  |
| 165779.2 | 186540   | 3362.814 | 12292.18 | 0        | 99886.3  | 162034.3 | 141282.6 | 17517.7  | 208912   |
| 629401.7 | 735874.1 | 0        | 8435.934 | 56134.8  | 237741.4 | 671918.8 | 345149.1 | 43875.76 | 195684.9 |
| 3972896  | 5669127  | 6772.679 | 38543.52 | 228583.9 | 570398.6 | 2713868  | 13788994 | 0        | 1961305  |
| 648238.8 | 410522   | 3245.171 | 0        | 15143.09 | 359652.8 | 1153255  | 1045894  | 69474.56 | 376386.8 |
| 214053.2 | 301601.1 | 2097.896 | 2359.527 | 21316.01 | 71149.79 | 108932.3 | 127624   | 0        | 0        |
| 1457421  | 289306.8 | 1145832  | 1106011  | 1190475  | 1625779  | 1268436  | 1542604  | 1244772  | 1357463  |
| 416130.8 | 230796.3 | 101752.8 | 104571.8 | 183655.3 | 244804   | 615675   | 629774.8 | 67170.11 | 303543.8 |
| 1485909  | 2177312  | 333996.8 | 304630.4 | 324771.1 | 176011.5 | 77767.89 | 45386.13 | 5151397  | 1824824  |
| 930075.7 | 1134670  | 8539.169 | 7700.606 | 21010.88 | 300673.4 | 975709.9 | 2869957  | 0        | 264022.4 |
| 23155764 | 34567152 | 304457.9 | 136387.1 | 0        | 322311.5 | 15710129 | 83476282 | 6453.226 | 14788056 |
| 928256.3 | 440151.8 | 200790.1 | 139175.3 | 1246048  | 5088866  | 5888002  | 1147735  | 233593.6 | 1035540  |
| 65692045 | 1.05E+08 | 83696.97 | 21238.49 | 368746.1 | 713526.9 | 27847545 | 2.5E+08  | 65653.73 | 32375374 |
| 3157024  | 2154974  | 18877.6  | 45643.37 | 168446.5 | 291114.3 | 6137333  | 5907797  | 312480.3 | 1818552  |
| 703021.4 | 570253.9 | 38509.67 | 444915.6 | 340298.1 | 849082.4 | 72751.99 | 85955.16 | 1295065  | 1085756  |
| 17921.24 | 7545.153 | 61715.46 | 154941.2 | 137351.8 | 1415309  | 13285.34 | 11610.9  | 25315.64 | 26967.7  |
| 3427427  | 2955846  | 689462.1 | 228714.6 | 122099.4 | 843438.2 | 5422476  | 7968215  | 204312.7 | 1677328  |

|          |          |          |          |          |          |          |          |          |          |
|----------|----------|----------|----------|----------|----------|----------|----------|----------|----------|
| 8209917  | 12716436 | 98386.88 | 32110.78 | 171408.7 | 0        | 4387611  | 30481389 | 0        | 5699702  |
| 4289790  | 5120729  | 216909.5 | 329862.6 | 612700.8 | 2425939  | 3081639  | 1571574  | 435805   | 1661294  |
| 1231774  | 880746   | 2559.238 | 3168.833 | 17601.57 | 87928.36 | 2400144  | 2058236  | 100990.1 | 656888.1 |
| 11372298 | 9115743  | 76801.57 | 53313.83 | 823084.9 | 8816499  | 16317093 | 20365699 | 57004.08 | 3456046  |
| 9531201  | 15607105 | 7990.342 | 0        | 25885.17 | 119999.4 | 3054908  | 37043997 | 13094.79 | 5860523  |
| 989767   | 614098.4 | 94891.24 | 60346.72 | 119554.9 | 442476.3 | 1742103  | 1442636  | 121325.9 | 600947.1 |
| 45480084 | 70223579 | 353909   | 202265   | 591257.2 | 671102.8 | 24980324 | 1.69E+08 | 0        | 25161969 |
| 92240098 | 68481335 | 17807245 | 6782113  | 28449267 | 6308119  | 1.56E+08 | 1.85E+08 | 17478536 | 34150821 |
| 306678.9 | 326396.5 | 2776.21  | 5532.429 | 11831.01 | 8642.444 | 471653.9 | 680442.8 | 54826.14 | 162537.8 |
| 200085.6 | 120090.2 | 9546.588 | 11629.32 | 27348.32 | 63248.72 | 370466.8 | 254601.7 | 30851.67 | 145955.9 |
| 673290.5 | 525626.5 | 87596.34 | 27030.93 | 241478.9 | 774083.1 | 585734.4 | 1234492  | 80653.82 | 173481.2 |
| 38863911 | 61948249 | 0        | 6916.868 | 394215.3 | 787363.2 | 16671644 | 1.48E+08 | 55927.38 | 21949154 |
| 22876961 | 34756069 | 13267.62 | 44402.19 | 702974.5 | 273030.6 | 14029395 | 83178924 | 0        | 10230702 |
| 426914   | 505946.3 | 24388.29 | 37714.04 | 30196.94 | 295914.9 | 284942.6 | 100043.9 | 22490.97 | 235616.6 |
| 31143123 | 6142072  | 21582559 | 33763822 | 28484378 | 19183390 | 30004277 | 39483266 | 23971848 | 27018645 |
| 7128035  | 8643516  | 389731.8 | 172338.3 | 531431.7 | 650782.7 | 8361876  | 20417992 | 19677.12 | 1374246  |
| 32358510 | 51559655 | 0        | 0        | 0        | 348359.7 | 14648223 | 1.23E+08 | 0        | 19162622 |
| 258960.5 | 280139.1 | 0        | 0        | 7315.052 | 58939.23 | 365465.7 | 362313.5 | 6339.05  | 50506.7  |
| 1266437  | 578724.8 | 572348.3 | 579717.4 | 1177111  | 6794482  | 6222999  | 1811921  | 778841.1 | 756174.9 |
| 406764.5 | 181951.9 | 5746.811 | 8131.269 | 6793.584 | 432363.9 | 643102.2 | 437480.2 | 350061.8 | 599068.1 |
| 897206.3 | 633626   | 80942.61 | 27044.77 | 241825.8 | 383032.8 | 1471447  | 1300793  | 87357.13 | 335631.2 |
| 1023050  | 433714.4 | 542786   | 806498.8 | 828868.8 | 4060183  | 4378039  | 866161.4 | 842943.6 | 1796713  |
| 178946.1 | 231606.6 | 0        | 0        | 0        | 65413.16 | 159387.9 | 40666.95 | 12749.01 | 57866.36 |
| 13022371 | 20869580 | 0        | 0        | 13831.46 | 50586.42 | 5704681  | 49396029 | 0        | 11617174 |
| 105424.2 | 70198.34 | 29778.74 | 31291.36 | 51751.88 | 101169.6 | 100702   | 67508.57 | 55021.2  | 42983.6  |
| 1516456  | 2418863  | 997283.7 | 591036.2 | 2684946  | 5499628  | 10853828 | 195663.1 | 1221924  | 65241.07 |
| 59219484 | 90446759 | 681492.1 | 355447.3 | 1120382  | 1134560  | 35147420 | 2.17E+08 | 22638.92 | 24571041 |
| 168312.3 | 68432.18 | 0        | 0        | 0        | 0        | 362536.5 | 198557.8 | 77931.1  | 118528.5 |
| 1384769  | 2138952  | 92398.62 | 72692.86 | 55329.9  | 398740.7 | 243917.1 | 5165335  | 607763.2 | 49287.25 |
| 284869.4 | 115897.1 | 99890.76 | 40256.97 | 368011.7 | 1818142  | 1412030  | 413777.1 | 115340.9 | 236218.7 |
| 6501924  | 4836622  | 9732.59  | 13279.8  | 2473571  | 5914938  | 8141002  | 7144996  | 2986759  | 6180926  |
| 9239171  | 14485604 | 92732.85 | 0        | 0        | 187298.9 | 4749181  | 34462353 | 5251.005 | 8067818  |
| 46846123 | 73888759 | 43907.65 | 0        | 96568.68 | 585257.4 | 23603835 | 1.77E+08 | 0        | 25945760 |
| 223376.1 | 163090.3 | 2714.052 | 0        | 32446.28 | 135898.3 | 360191.3 | 254049.8 | 155096.5 | 209162.4 |
| 12579511 | 19848773 | 155300.3 | 138781.3 | 1203507  | 77943.64 | 5042475  | 47429664 | 61883.76 | 7567609  |
| 395388.9 | 361451.4 | 19421.47 | 13298.57 | 69064.33 | 412716.6 | 360560.1 | 297115.5 | 24826.9  | 117713.9 |
| 1645321  | 912150.7 | 289520   | 251176   | 853106.1 | 570930.4 | 2687082  | 2243582  | 373988   | 978573.8 |
| 1250787  | 1316911  | 125036   | 23866.65 | 0        | 321565.8 | 1743985  | 3427661  | 108213.6 | 446694   |
| 11301126 | 17076102 | 140065   | 13601.43 | 153838.5 | 358961.5 | 7220151  | 41152943 | 64201.75 | 6789202  |
| 415319.5 | 401666.2 | 7979.116 | 6626.944 | 43673.27 | 31565.99 | 675210.7 | 858261.9 | 130745.8 | 208166.1 |
| 13398308 | 19239611 | 261343.8 | 282434.3 | 615642.3 | 8303155  | 2786880  | 5841495  | 13575.33 | 8102743  |
| 227954.5 | 69127.51 | 136940.5 | 115465.4 | 106959.2 | 152290.6 | 327205.5 | 217048.2 | 191492.9 | 149597.6 |
| 22501698 | 33697093 | 214197.3 | 145363   | 59415.71 | 221555.1 | 15776080 | 81337140 | 0        | 14644972 |
| 18618466 | 29869645 | 2273.222 | 0        | 393950.1 | 293362.7 | 7769359  | 71222382 | 0        | 10974357 |
| 258211.2 | 175405.2 | 249165.4 | 311529   | 261227.5 | 629307   | 466289.4 | 559948   | 219614.6 | 184595.7 |
| 118756.5 | 96210.19 | 0        | 0        | 0        | 18577.76 | 218876.4 | 244400.8 | 4614.31  | 75302.21 |
| 2898593  | 3269549  | 7376.173 | 8749.109 | 1124580  | 1385298  | 2515294  | 7838741  | 214768   | 1223676  |

|          |          |          |          |          |          |          |          |          |          |
|----------|----------|----------|----------|----------|----------|----------|----------|----------|----------|
| 63712.48 | 32943.2  | 46648.46 | 178533.4 | 96683.31 | 510051.7 | 41568.14 | 70733.66 | 78680.12 | 28608.29 |
| 418085.2 | 554372.4 | 5461.746 | 14022.43 | 17136.97 | 212480.2 | 259527.6 | 119501   | 19206.47 | 96971.31 |
| 12170565 | 19410096 | 40049.22 | 3208.894 | 403546.4 | 110452.9 | 5329588  | 46309223 | 4286.038 | 6368443  |
| 104248   | 69463.65 | 68534.57 | 41707.09 | 224362.1 | 835034.9 | 266358.7 | 97145.22 | 17215.41 | 103664.9 |
| 54934046 | 87349731 | 152554.8 | 36452.78 | 262144.9 | 762847   | 26316401 | 2.08E+08 | 0        | 27808199 |
| 16189539 | 21952170 | 24048.57 | 0        | 83352.32 | 390440.9 | 16899736 | 52005328 | 0        | 5928204  |
| 8404941  | 13135238 | 12681.39 | 42950.47 | 0        | 70008.38 | 4686072  | 31419106 | 0        | 6117622  |
| 2447980  | 1907987  | 171169.7 | 198273   | 508803.5 | 2767485  | 2505999  | 2127408  | 397184.1 | 942486.7 |
| 17211594 | 28265081 | 13788.74 | 6878.524 | 125158.8 | 107817.3 | 6005408  | 67075352 | 34691.01 | 9763545  |
| 304168   | 467179.2 | 0        | 0        | 4096.26  | 45633.99 | 149794.1 | 105248.6 | 4860.805 | 75399.5  |
| 8619694  | 11191955 | 0        | 85652.07 | 122120.1 | 437124.4 | 9801912  | 26012813 | 0        | 13665469 |
| 156506   | 137466.6 | 0        | 0        | 128450.7 | 1292540  | 1380653  | 380148.1 | 6182.158 | 133706.5 |
| 1181291  | 1394282  | 38349.17 | 22621.36 | 59828.65 | 256839   | 1420709  | 952310   | 36933.66 | 520546   |
| 14611726 | 19809459 | 0        | 0        | 251605.2 | 310437.2 | 15207463 | 46973158 | 0        | 5747946  |
| 1865486  | 1389317  | 238106.9 | 106575.8 | 313540.5 | 1119122  | 2838836  | 1478332  | 322577.9 | 1310306  |
| 661030.5 | 413841.4 | 0        | 0        | 3481.338 | 57923.79 | 1339183  | 1028343  | 84041.65 | 380959.4 |
| 295603.8 | 188171.4 | 99340.22 | 85768.72 | 103545.6 | 236056.8 | 362580.8 | 383378.3 | 17294.84 | 307546.8 |
| 268058.7 | 191609.5 | 271250.3 | 320948.2 | 1082916  | 7904300  | 40131519 | 108730.3 | 168390   | 110596.8 |
| 1232128  | 1382363  | 176624.9 | 176436.4 | 304130   | 757674.5 | 810798.9 | 652461   | 275259.8 | 510559.5 |
| 86358.93 | 57116.75 | 7055.718 | 0        | 116185.4 | 513913   | 759512.3 | 120420.5 | 7058.419 | 45232.83 |
| 129114.2 | 70404.91 | 15088.33 | 15641.85 | 145856.5 | 829028.7 | 898293.2 | 129828.2 | 22424.63 | 137283.7 |
| 4893813  | 7851542  | 0        | 0        | 696545.1 | 6772.732 | 1628047  | 18567458 | 0        | 4436480  |
| 2341858  | 2690203  | 96483.65 | 183231.8 | 327440.6 | 1475487  | 1892794  | 884984   | 169836.9 | 986023.5 |
| 5768654  | 8965230  | 0        | 0        | 102894.2 | 62702.17 | 3307035  | 21460370 | 0        | 4075248  |
| 684093.6 | 405742.7 | 78859.87 | 101962.8 | 118097.7 | 1281967  | 87341.96 | 719526.9 | 78844.82 | 537461.5 |
| 781943.4 | 1001436  | 258473.1 | 247513.9 | 245757   | 261613.4 | 74167.38 | 32184.98 | 2317630  | 1278077  |
| 8474064  | 14193711 | 3585.061 | 0        | 135846.9 | 44171.56 | 2202646  | 33471717 | 3589.603 | 6025170  |
| 6550864  | 9981369  | 47727.95 | 5718.165 | 0        | 47360.22 | 4345559  | 23999680 | 12054.84 | 3978775  |
| 6856675  | 5992709  | 83422.82 | 153946.2 | 1323046  | 3189525  | 10224470 | 7954120  | 866213.3 | 2579134  |
| 7168827  | 11975993 | 272769.8 | 389918.1 | 310843.6 | 731032.5 | 448086.2 | 3030696  | 373573.3 | 1144704  |
| 30636441 | 30691748 | 5821525  | 1046805  | 17260484 | 2147547  | 35670230 | 77145027 | 0        | 14251903 |
| 1971032  | 2737739  | 13343.52 | 55938.24 | 114072.5 | 262363.7 | 1611173  | 6764598  | 5168.87  | 704381.5 |
| 2224769  | 1605345  | 766372   | 933604.8 | 1318258  | 1707967  | 1803851  | 4107726  | 30298.01 | 2374190  |
| 585885   | 410420.1 | 11012.23 | 0        | 14974.24 | 35534.33 | 1155744  | 992887   | 67718.29 | 275263.8 |
| 3473750  | 5805170  | 39610.86 | 72947.42 | 261308.8 | 538059.1 | 147488.7 | 13806884 | 400695.3 | 1730287  |
| 1066182  | 183954.2 | 717981.1 | 1000759  | 1006722  | 867735.6 | 1113794  | 1265113  | 867584.2 | 888610.3 |
| 8496295  | 10111968 | 854257   | 233542.8 | 1532086  | 2276492  | 8484316  | 25543279 | 30848.93 | 2352291  |
| 14247972 | 21785119 | 1013838  | 701596.2 | 428445.7 | 1426376  | 6349337  | 52619043 | 59752.14 | 10230704 |
| 7864450  | 4981560  | 3898139  | 2817134  | 29340220 | 10651406 | 39494351 | 13641216 | 1486363  | 4045731  |
| 72938163 | 1.18E+08 | 91849.04 | 6174.139 | 518307.8 | 2235783  | 30713865 | 2.8E+08  | 19843.51 | 32345137 |
| 64638539 | 93585440 | 8210764  | 3267010  | 24095695 | 490574.5 | 23812774 | 2.26E+08 | 0        | 27521696 |
| 8024440  | 10207483 | 553697.3 | 776254.5 | 1137511  | 3889979  | 4900030  | 2793954  | 830288.4 | 2564990  |
| 1552089  | 2241818  | 7338.075 | 14816.83 | 463862.4 | 342915.9 | 623497.2 | 5397392  | 38397.84 | 147169.5 |
| 354913.8 | 291782.1 | 80749.58 | 12087.86 | 85001.94 | 41655.66 | 576525.5 | 821415.6 | 51292.9  | 200527.6 |
| 126996.8 | 78439.77 | 100404.5 | 210457.7 | 209088.3 | 165744.7 | 189545.2 | 190186.3 | 28650.29 | 65946.5  |
| 1152393  | 1717438  | 275250.8 | 261761.9 | 267675.7 | 103424.3 | 35396.99 | 12645.26 | 4028435  | 1474772  |
| 812464.6 | 445028.6 | 138567.3 | 233574.3 | 305658.6 | 859073.9 | 986474.7 | 1096827  | 250386.3 | 412342.9 |

|          |          |          |          |          |          |          |          |          |          |
|----------|----------|----------|----------|----------|----------|----------|----------|----------|----------|
| 193573.4 | 195902.2 | 7052.3   | 7723.147 | 18617.72 | 260224.4 | 80334.42 | 238568   | 11642.53 | 506964.6 |
| 13349243 | 21391876 | 7187.291 | 17129.17 | 893696.8 | 227136.9 | 5515625  | 51050357 | 40753.74 | 7503882  |
| 6671027  | 4441594  | 1562244  | 822976.7 | 2842710  | 1600373  | 10771742 | 12732404 | 1965220  | 2697689  |
| 259160.8 | 240277.2 | 564647.9 | 800440.4 | 84990.06 | 297417.2 | 491287.2 | 594685.7 | 430909.4 | 96090.07 |
| 7092026  | 5731948  | 267781   | 110081.1 | 8743737  | 897487.4 | 6947404  | 6615334  | 1068410  | 1918478  |
| 292839.2 | 224713.4 | 128187.8 | 42442.48 | 512941.3 | 1760156  | 1074763  | 372890.1 | 163733.5 | 131597.7 |
| 54807.68 | 67410.87 | 26244.01 | 33059.6  | 115097.6 | 636927.8 | 2825134  | 79590.01 | 5770.071 | 18996.19 |
| 1505254  | 976439.8 | 3427.144 | 0        | 25472.24 | 305560.2 | 2959277  | 2350632  | 209654.9 | 795356.8 |
| 890333.6 | 1432036  | 8953.43  | 18335.14 | 22512.48 | 36220.09 | 347720   | 304246.1 | 5629.488 | 606976.9 |
| 23945863 | 32769785 | 0        | 0        | 548531.1 | 755475.6 | 24399286 | 77650954 | 4676.054 | 8198759  |
| 580727.1 | 459581.3 | 136579.7 | 30179.22 | 203460   | 190996.5 | 862060.5 | 761848   | 42501.54 | 165403   |
| 24617414 | 37344054 | 210478.4 | 159296.9 | 118522.4 | 1036067  | 16271906 | 89492786 | 0        | 10503819 |
| 803770.2 | 982920.9 | 8122.201 | 34872.11 | 49266.8  | 444177.2 | 674555.4 | 127321   | 70206.52 | 355979.7 |
| 780961.1 | 412295.2 | 228361.7 | 286479.5 | 270872.2 | 906241.2 | 831075.1 | 1410954  | 481193.1 | 599566.4 |
| 16228888 | 26700616 | 8459.19  | 17836.93 | 63020.76 | 200007.2 | 6054272  | 63243779 | 10245.39 | 11175619 |
| 3007913  | 2537237  | 39212.2  | 6332.51  | 61119.81 | 685084.2 | 5333569  | 5756926  | 969993.1 | 2841536  |
| 29520428 | 28443480 | 2763150  | 2921102  | 5702990  | 31936010 | 20562510 | 13628102 | 3791835  | 9368950  |
| 2833433  | 2847966  | 381774.1 | 156853.9 | 4159145  | 161235.3 | 528653.4 | 3597212  | 0        | 7352594  |
| 30069326 | 45117927 | 307372.1 | 192926.9 | 293719.4 | 354139   | 21884644 | 1.09E+08 | 0        | 16917189 |
| 137991.7 | 196256.7 | 6474.492 | 12978.73 | 32446.56 | 1703190  | 5004072  | 0        | 10651.74 | 51412.54 |
| 451134.6 | 494360.4 | 30401.7  | 88608.51 | 91315.91 | 273711.6 | 364633.4 | 123517.3 | 56231.91 | 138062.9 |
| 2874515  | 2608890  | 0        | 5188.397 | 55820.43 | 1875714  | 4122177  | 6176834  | 567323.9 | 1619996  |
| 494578.2 | 346996.9 | 2559.274 | 3823.999 | 0        | 32411.99 | 984044.6 | 943179.7 | 26530.42 | 496145.9 |
| 5486476  | 7658528  | 0        | 14035.94 | 0        | 141149.1 | 5407894  | 18503603 | 0        | 3041013  |
| 6353498  | 9084665  | 168401.6 | 30270.97 | 0        | 79753.95 | 5687365  | 22042576 | 61294.79 | 5360605  |
| 578643.1 | 415508.5 | 545050.5 | 386396   | 1248603  | 6619114  | 1386063  | 747844.1 | 69457.11 | 218521   |
| 652784.1 | 315602.1 | 64769    | 16395.31 | 91296.1  | 1239379  | 266029.3 | 976976.9 | 305684.6 | 509712   |
| 654489.1 | 739137.8 | 60043.74 | 5358.619 | 11062.15 | 107111.8 | 885116.2 | 1896086  | 5141.388 | 263325.1 |
| 16118700 | 25812642 | 25637.62 | 46815.31 | 1648810  | 182079.7 | 6531572  | 61616868 | 31821.05 | 9268286  |
| 108503.2 | 82669.59 | 2680.669 | 0        | 12044.67 | 105250.6 | 145324.7 | 124651.2 | 36559.72 | 36766.66 |
| 24246063 | 32680928 | 341483.7 | 238487.8 | 485870.9 | 613764.4 | 25853050 | 78083872 | 4592.121 | 8962117  |
| 448471   | 565126.6 | 3217.926 | 5615.775 | 21617.77 | 229523   | 375485.8 | 135831.8 | 11162.75 | 120510   |
| 2639824  | 2296378  | 1901621  | 1083566  | 657677.1 | 1940411  | 1133680  | 6656362  | 2090491  | 842209.3 |
| 1593156  | 2039313  | 58199.4  | 109357.1 | 510167.3 | 530188.9 | 1032390  | 1966846  | 34731.57 | 18639.44 |
| 1276102  | 1227369  | 185697.6 | 243068.6 | 163837.1 | 1032880  | 1194317  | 900234.8 | 93571.55 | 527839.4 |
| 234315.4 | 200347.1 | 343553.4 | 445106.6 | 344619.4 | 431355.6 | 199440.6 | 121520.6 | 177079.4 | 150916.5 |
| 2028196  | 1493776  | 278476.9 | 262188.1 | 599820   | 2326300  | 1992444  | 2011815  | 209754.2 | 938116.4 |
| 1027364  | 1175830  | 0        | 0        | 9996.723 | 398705.6 | 1272693  | 2950313  | 33086.46 | 116492.1 |
| 39171712 | 64430942 | 0        | 0        | 103521.4 | 187810.3 | 15900431 | 1.53E+08 | 0        | 18872480 |
| 213209.6 | 118433   | 327346.2 | 68287.64 | 214660.9 | 812068.3 | 466197.5 | 283460.6 | 123234.5 | 138267.7 |
| 4215694  | 4170840  | 1556031  | 1473515  | 3533035  | 40101267 | 22786100 | 1678506  | 4363243  | 11377639 |
| 1995251  | 1314772  | 177246.2 | 85366    | 479095.6 | 514526.3 | 3600897  | 3120726  | 805784.1 | 598429.3 |
| 387841.8 | 221476.5 | 3692.189 | 0        | 20047.57 | 750723   | 145483.7 | 704498.5 | 180422.9 | 175756   |
| 30170560 | 33561572 | 1604664  | 1235876  | 3941466  | 22426261 | 25563393 | 16571950 | 2661717  | 9539980  |
| 35274559 | 32849991 | 709861.2 | 287591.5 | 1481087  | 10925775 | 56874011 | 85903098 | 7711813  | 36104039 |
| 1988479  | 2068231  | 4752.495 | 0        | 38918.46 | 674204.9 | 2895461  | 4895145  | 0        | 653041.1 |
| 679192.5 | 980852.2 | 3027.505 | 11120.03 | 4588.457 | 74205.38 | 544769.2 | 406278.5 | 5783.131 | 435795.6 |

|          |          |          |          |          |          |          |          |          |          |
|----------|----------|----------|----------|----------|----------|----------|----------|----------|----------|
| 405811.7 | 581830.5 | 25062.42 | 12783    | 124252.9 | 154986.3 | 92506.59 | 1332861  | 0        | 12840.67 |
| 14444153 | 21348407 | 5977.042 | 3699.015 | 46124.9  | 176761.2 | 11905818 | 50894956 | 0        | 5293286  |
| 1144453  | 649811.8 | 553754.5 | 202589.6 | 550978.7 | 608782.6 | 1625841  | 1415631  | 348678.3 | 617523   |
| 1376879  | 1073461  | 142278   | 80201.36 | 320333.2 | 1623436  | 1343791  | 1287823  | 116970.3 | 612627.2 |
| 74055.86 | 48772.69 | 257336.6 | 318640.5 | 88860.92 | 72622.32 | 10084.09 | 152764.1 | 83893.12 | 44973.67 |
| 930717   | 1170556  | 0        | 0        | 14637.66 | 247411.3 | 1030414  | 2887867  | 0        | 52211.14 |
| 5827654  | 3643157  | 1608442  | 984884.1 | 2216888  | 1263776  | 9703257  | 9321956  | 1600644  | 2338892  |
| 17377545 | 18213938 | 6351543  | 33032148 | 1.84E+08 | 29025556 | 35924835 | 46829606 | 462429.4 | 7585308  |
| 753064.5 | 679951.2 | 39293.18 | 34523.27 | 120195.7 | 671146.3 | 846391.1 | 397530   | 99419.31 | 292481.8 |
| 968533.4 | 639782.4 | 2566.123 | 3776.973 | 31362.83 | 52131.77 | 1960104  | 1342396  | 45741.83 | 548457.9 |
| 506991.2 | 293632.6 | 2464299  | 3847930  | 544234.6 | 235693.7 | 68578.53 | 69356.74 | 512853.3 | 422728.8 |
| 108920.3 | 127726   | 0        | 0        | 3521.655 | 50088.69 | 121687.5 | 330021.4 | 4000.171 | 46307.37 |
| 789223.7 | 493946.5 | 37701.34 | 7887.675 | 77180.28 | 902378.9 | 1070065  | 973812.1 | 202242.3 | 432551.9 |
| 55199.88 | 54704.31 | 31993.73 | 31209.67 | 64488.85 | 228964.9 | 221560.7 | 0        | 18267.7  | 46824.41 |
| 612301.4 | 521633.2 | 54039.73 | 53562.75 | 38275.93 | 695104.1 | 608349.6 | 505917   | 92924.28 | 165967.4 |
| 1.04E+08 | 1.65E+08 | 152977.2 | 88529.05 | 1211051  | 2439836  | 56542569 | 3.95E+08 | 0        | 44089704 |
| 353187.1 | 312823.4 | 8618.985 | 2891.643 | 0        | 13222.15 | 648096.3 | 341571.4 | 77158.01 | 266631.3 |
| 1124791  | 841643.5 | 93894.87 | 30296.34 | 269967.5 | 538505.2 | 1814286  | 2097776  | 216425   | 263510.8 |
| 13935892 | 8024350  | 2252485  | 756132.7 | 5016204  | 17731592 | 15203244 | 19216358 | 3511953  | 7029780  |
| 371896.6 | 504767   | 0        | 5354.288 | 3541.862 | 89239.37 | 337654.4 | 62760.42 | 14137.2  | 87691.24 |
| 414181.3 | 516902.4 | 648896.1 | 1146769  | 3880102  | 190491.9 | 476263   | 1300210  | 12373.14 | 423458.1 |
| 11337987 | 15080335 | 129307.7 | 226690.1 | 1142096  | 500905.3 | 11826733 | 35929468 | 0        | 3430427  |
| 101217.3 | 115253.1 | 44907.46 | 48126.92 | 36611.17 | 19641.26 | 37105.52 | 55180.83 | 0        | 25971.92 |
| 8528376  | 14156100 | 6944.376 | 0        | 123889.3 | 0        | 3238840  | 33506480 | 0        | 5318473  |
| 1033931  | 997684.2 | 178295.2 | 236656   | 300050.7 | 791647   | 835948   | 560366   | 241089.7 | 492141.9 |
| 109850.6 | 90679.98 | 0        | 0        | 0        | 43972.66 | 190124.1 | 249238.7 | 6315.37  | 77253.22 |
| 4375358  | 2822135  | 4963.487 | 23336.15 | 68545.77 | 850004.5 | 8691614  | 7167096  | 600231.2 | 2435112  |
| 1142614  | 1315371  | 139901.9 | 196031.8 | 246982.9 | 693759.3 | 756859.2 | 520481.5 | 200158.2 | 452545.2 |
| 3059798  | 1937466  | 7295.093 | 0        | 0        | 131814.3 | 6312379  | 5391069  | 296894.7 | 2123551  |
| 5396654  | 7920505  | 0        | 4895.109 | 0        | 38190.39 | 4686752  | 19099746 | 0        | 2970712  |
| 492931.8 | 369208.6 | 102741.8 | 50421.4  | 101346.2 | 218745.6 | 769321.5 | 1016258  | 28414.66 | 344478.6 |
| 761818.2 | 580551.8 | 55706.94 | 36216.75 | 141935.7 | 888356.8 | 822153.9 | 671075.2 | 75788.21 | 367755   |
| 85684881 | 1.38E+08 | 118668.2 | 29722.42 | 752680.3 | 1791720  | 43086754 | 3.28E+08 | 3855.048 | 36725347 |
| 82893516 | 1.34E+08 | 67288.37 | 56196.87 | 1314792  | 1220606  | 40840828 | 3.18E+08 | 3946.616 | 36145572 |
| 3464973  | 3037980  | 188896.5 | 160742   | 544703.6 | 3644368  | 3551349  | 3018983  | 56155.39 | 1173273  |
| 315222.1 | 361185.7 | 339599.1 | 105086   | 537686.8 | 1511253  | 765086.5 | 405535.3 | 9723.391 | 76306.25 |
| 138000.3 | 144846.3 | 38959.81 | 95480.67 | 70663.13 | 62048.49 | 19022.8  | 269394.4 | 14622.72 | 32066    |
| 1844674  | 2317884  | 76998.32 | 90610.21 | 244362.4 | 1005082  | 1314104  | 648076   | 100532.9 | 644759.4 |
| 1650863  | 2111292  | 858967.1 | 444171   | 2449233  | 9186667  | 30002349 | 404726.9 | 5233033  | 114676.2 |
| 713157.6 | 814145.2 | 0        | 0        | 0        | 263385.6 | 913315.9 | 2018713  | 0        | 52976.65 |
| 16245420 | 27367813 | 0        | 0        | 49075.19 | 511838.6 | 4966916  | 64537560 | 0        | 10923115 |
| 6087993  | 8463811  | 39771.91 | 8783.949 | 795916.2 | 1305750  | 4651656  | 20635745 | 28481.1  | 2318746  |
| 426061   | 307404.4 | 115106.6 | 11465.87 | 257124.3 | 85584.18 | 640642.3 | 910594.2 | 217585.2 | 162424.2 |
| 80907882 | 85005885 | 1040146  | 1099819  | 4259296  | 31353404 | 1.12E+08 | 2.06E+08 | 794139.5 | 47710146 |
| 2.08E+08 | 2.82E+08 | 2743036  | 1361040  | 3467633  | 27621188 | 2.08E+08 | 6.97E+08 | 363837   | 1.19E+08 |
| 206079.9 | 286339.8 | 33075.6  | 17486.61 | 105682.5 | 3269552  | 12515652 | 7397.135 | 0        | 66948.05 |
| 697945.5 | 957956.3 | 33695.62 | 17512.26 | 75640.34 | 293065.1 | 407645.3 | 215715.5 | 37113.33 | 171027.4 |

|          |          |          |          |          |          |          |          |          |          |
|----------|----------|----------|----------|----------|----------|----------|----------|----------|----------|
| 580004   | 209208.4 | 194440   | 334372.4 | 300565.7 | 738456.9 | 555419.3 | 472839.2 | 306910.2 | 618060.2 |
| 219913.4 | 195367.9 | 120277.9 | 135099.5 | 107577.7 | 140339.9 | 53686.07 | 113716.1 | 21550.13 | 112587.9 |
| 18444668 | 29481633 | 4260.373 | 2600.411 | 448873   | 413452.5 | 9670717  | 70314295 | 3598.329 | 9114431  |
| 365860   | 260057.6 | 75946.07 | 60957.66 | 159389.5 | 29302.05 | 601069.7 | 122162.2 | 223759.4 | 314680.7 |
| 2949576  | 3551083  | 77627.09 | 77899.82 | 748208.2 | 1391367  | 2480853  | 9065187  | 275600.3 | 699940.7 |
| 451734   | 410732.3 | 677794.4 | 719642.3 | 5390999  | 284288   | 1080564  | 1114784  | 3123.494 | 315303   |
| 8040358  | 7354364  | 1137149  | 347992.9 | 1583766  | 3587222  | 11204078 | 20098155 | 37765.26 | 6470465  |
| 141657.8 | 151918.1 | 0        | 0        | 3430.271 | 16451.37 | 220996.9 | 206216.5 | 5804.86  | 107477.7 |
| 75069193 | 1.21E+08 | 525097.6 | 300656.6 | 969026.2 | 1485005  | 38169871 | 2.88E+08 | 0        | 35021571 |
| 2744798  | 2296830  | 540124.9 | 249089.2 | 487407.6 | 854455.3 | 4261113  | 6663369  | 730423.8 | 1582243  |
| 44235030 | 71547677 | 57725.07 | 4730.594 | 703025.2 | 723287.9 | 21906024 | 1.7E+08  | 0        | 19196749 |
| 281966.5 | 259608.5 | 20520.83 | 18985.31 | 16386.41 | 192419.6 | 372257.6 | 610532.8 | 0        | 89197.72 |
| 6238907  | 6614730  | 0        | 4422.351 | 0        | 345661.3 | 10165306 | 14303498 | 0        | 3788470  |
| 1117865  | 757917.4 | 9476.122 | 7929.263 | 75351.66 | 687216.2 | 1934783  | 1607150  | 123255.1 | 529127.1 |
| 2275062  | 2163314  | 176914.9 | 87278.81 | 909727   | 650076.2 | 3075362  | 5597892  | 217749.5 | 640860.9 |
| 532186.8 | 682956.6 | 6910.213 | 29098.03 | 212566.5 | 7730436  | 28038389 | 78203.35 | 40525.57 | 179402.1 |
| 398111.5 | 159532.3 | 191827   | 221095.8 | 276311.4 | 482725.6 | 313566.1 | 209197.8 | 344727.2 | 392238   |
| 29397254 | 47511793 | 24556.93 | 0        | 416661   | 275237.4 | 15048866 | 1.13E+08 | 23522.1  | 15515868 |
| 1.17E+08 | 1.73E+08 | 109796.6 | 6213.584 | 244501.2 | 11657872 | 93739305 | 4.07E+08 | 441388.4 | 7199220  |
| 46679745 | 74264307 | 118328   | 37793.2  | 524534.5 | 1826839  | 25695844 | 1.78E+08 | 14014.31 | 25845918 |
| 3273103  | 4237161  | 208755   | 265825.3 | 437801.7 | 1572189  | 2123429  | 1113752  | 322179.3 | 1119862  |
| 468720.6 | 318612.8 | 2992.282 | 0        | 6633.915 | 17007.52 | 954455   | 961749.6 | 98361.29 | 320575.1 |
| 403650.6 | 496378.6 | 9676.929 | 23999.79 | 38634.36 | 233253.8 | 322210.4 | 106144.7 | 25154.68 | 78759.5  |
| 112396.4 | 65545.46 | 5412.257 | 5698.006 | 14608.14 | 196266.4 | 71577.6  | 208853.2 | 80471.48 | 62521.05 |
| 31100538 | 51889493 | 0        | 11374.81 | 85120.53 | 158529.5 | 12357276 | 1.23E+08 | 0        | 15513017 |
| 1070671  | 781383.5 | 3258.937 | 5292.124 | 103721.6 | 110006.3 | 2074707  | 1991133  | 47503.62 | 530847.5 |
| 1032535  | 709002.1 | 645633.8 | 866722.6 | 739647.8 | 640341.1 | 279919.3 | 1386799  | 27598.24 | 549978.4 |
| 22498838 | 37036563 | 30803.55 | 0        | 0        | 300331.5 | 10122425 | 87922102 | 0        | 13202612 |
| 5513710  | 3730599  | 737091.3 | 125762.3 | 1121903  | 9746409  | 1916416  | 9974004  | 2348072  | 4313594  |
| 58135523 | 90198068 | 640744.1 | 347225.9 | 1272003  | 715142   | 38166433 | 2.16E+08 | 20835.27 | 24808466 |
| 14198702 | 18936414 | 0        | 5764.408 | 289725   | 267313.3 | 16528187 | 45138792 | 0        | 6049154  |
| 480272.2 | 269691.5 | 248408.9 | 207779.6 | 677384   | 3028946  | 1521071  | 743820   | 175865.2 | 391691.3 |
| 1900704  | 1128855  | 179412   | 88326.46 | 539255.6 | 2400593  | 2217627  | 2440690  | 370825.1 | 1054223  |
| 62451003 | 1E+08    | 565514.4 | 220835.8 | 781342.4 | 995302.7 | 33467331 | 2.39E+08 | 0        | 30844375 |
| 13780326 | 17043635 | 2464604  | 2917084  | 9544400  | 2408164  | 4531643  | 43464211 | 230158.7 | 6624588  |
| 272872   | 394719.9 | 0        | 0        | 0        | 0        | 260648.6 | 970138.9 | 0        | 97788.4  |
| 19618460 | 28064609 | 253941.5 | 546343   | 1592432  | 9316096  | 9033065  | 69292633 | 202524.2 | 9661161  |
| 14876280 | 18055602 | 847234.9 | 395272.6 | 5428684  | 7428236  | 10208257 | 44222051 | 280138.3 | 3971819  |
| 529515.8 | 279784.4 | 6328.225 | 5899.63  | 70203.09 | 555781.4 | 815401.4 | 806691.7 | 123290.9 | 363227   |
| 485210.9 | 323168.7 | 0        | 0        | 0        | 175329   | 929868.7 | 688673.2 | 72199.34 | 300865.1 |
| 1268712  | 889640.4 | 251239.5 | 39521.05 | 326394.3 | 1380718  | 1480359  | 2403140  | 261412.5 | 502839.3 |
| 6207895  | 10374019 | 18612.14 | 4745.456 | 0        | 29728.92 | 2514814  | 24559782 | 0        | 3584829  |
| 1348463  | 292152.7 | 855593.9 | 1100306  | 1138585  | 1605304  | 1010882  | 1370958  | 1012898  | 1175434  |
| 604163.7 | 369092.5 | 173307   | 60874.33 | 173293.5 | 172671   | 1044720  | 1186364  | 227856.5 | 554819.5 |
| 76480.39 | 56607.87 | 114594.2 | 104963   | 70230.66 | 80609.52 | 228064.1 | 90029.95 | 21021.87 | 35335.77 |
| 398180.7 | 300727.1 | 57099.78 | 21518.58 | 56585.24 | 465256.3 | 433178.9 | 610891.7 | 76956.09 | 166849.5 |
| 401161.4 | 220071.5 | 120754.6 | 168078.5 | 196051.6 | 2317913  | 3382925  | 508835.7 | 244658.8 | 133865.6 |



|          |          |          |          |          |          |          |          |          |          |
|----------|----------|----------|----------|----------|----------|----------|----------|----------|----------|
| 634574.1 | 230612.4 | 240326.8 | 667806.2 | 985141.3 | 1157339  | 1579495  | 929913.5 | 329219.7 | 600615.1 |
| 101123.2 | 170176.6 | 19605.25 | 389583.5 | 152073.7 | 2049423  | 214856.8 | 74104.39 | 7765.925 | 0        |
| 2074872  | 1886491  | 1082736  | 1162515  | 606971.3 | 1444162  | 886992.6 | 5391333  | 1470677  | 665349.8 |
| 517156.3 | 343892.6 | 43181.71 | 29544.23 | 119476.2 | 650192.6 | 575456.5 | 691520.6 | 63796.32 | 244638.6 |
| 1151922  | 1467950  | 58822.45 | 21986.81 | 150480.3 | 319543.9 | 1108471  | 3668187  | 0        | 220725.5 |
| 14174825 | 22173432 | 71462.63 | 38835.8  | 470968.3 | 2971274  | 6513566  | 53424573 | 29868.39 | 7576401  |
| 599235.7 | 739484   | 34794.18 | 11070.82 | 62947.21 | 64977.34 | 716992.4 | 443363   | 0        | 102393.4 |
| 14630278 | 19466651 | 1221705  | 1574415  | 2286082  | 6400807  | 8174127  | 5027126  | 1783995  | 4415963  |
| 933852.6 | 688381.7 | 1195925  | 1207338  | 8228546  | 933447   | 1737747  | 1637314  | 22902.32 | 902448.5 |
| 168993.3 | 96666.45 | 79705.59 | 7002.089 | 23156.42 | 54505.41 | 294520.1 | 210317.9 | 25141.25 | 173452   |
| 733045.4 | 1341733  | 0        | 0        | 0        | 0        | 0        | 232232.9 | 0        | 220919.3 |
| 4981115  | 7523362  | 273263.3 | 564637.8 | 2229321  | 0        | 1234312  | 18146466 | 0        | 3526646  |
| 1289684  | 767651.4 | 186143.6 | 68306.7  | 418829.7 | 243726.7 | 2379362  | 2009292  | 439910.6 | 692239.1 |
| 17359510 | 23785101 | 7424.599 | 5469.89  | 210410.6 | 643471.7 | 19028458 | 57128770 | 0        | 7521613  |
| 203685.8 | 265462.3 | 4619.709 | 0        | 3530.025 | 227659.6 | 33726.73 | 164395.3 | 15026.32 | 13259.97 |
| 4913868  | 6389276  | 25308.99 | 58075.02 | 95841.26 | 1429430  | 5043169  | 16018180 | 0        | 4122835  |
| 13478314 | 21927156 | 111230.9 | 64481.75 | 378708.3 | 249829.7 | 6521508  | 52159487 | 0        | 5392921  |
| 6945659  | 9343305  | 232680   | 166380   | 452148.3 | 445318.6 | 7266148  | 23214719 | 96222.72 | 3899263  |
| 412080.5 | 492036.7 | 94351.29 | 104398.8 | 75230.24 | 237787.8 | 199945.5 | 81974.92 | 57509.2  | 148307.3 |
| 8124466  | 8117223  | 143972.3 | 81906.4  | 1542727  | 2995674  | 11550144 | 20447251 | 254718.4 | 6543768  |
| 439550.3 | 265143.8 | 55099.28 | 62713.66 | 177744   | 224831.3 | 714620   | 578861.9 | 9728.77  | 374264   |
| 2443524  | 2742047  | 176623.5 | 10121    | 122895.9 | 388763.4 | 3451219  | 6834653  | 65916.12 | 284907   |
| 1.76E+08 | 2.54E+08 | 440939.2 | 33723.58 | 471387.6 | 18885965 | 1.56E+08 | 5.95E+08 | 38687.09 | 11202805 |
| 71039.44 | 47871.08 | 2136.917 | 2164.458 | 5155.895 | 88037    | 88289.11 | 66070.52 | 16743.03 | 42323.77 |
| 41142.57 | 45094.92 | 42566.75 | 398694.5 | 156048.1 | 32235.14 | 20012.89 | 0        | 36714.44 | 116004   |
| 22619060 | 37239071 | 231059.7 | 26369.72 | 307837.2 | 767004.7 | 9915985  | 88471746 | 23751.39 | 11225541 |
| 665478   | 833593.5 | 193649.3 | 242724.2 | 37671.47 | 184579.9 | 385278.7 | 262834.9 | 238754.8 | 261667.8 |
| 14706607 | 22351977 | 0        | 0        | 0        | 2912200  | 9262425  | 52256380 | 0        | 212790.8 |
| 9548219  | 10678922 | 34762.15 | 75919.61 | 4144116  | 4827388  | 8734982  | 25561737 | 822677   | 3946375  |
| 1458904  | 1275184  | 188836.8 | 86627.26 | 215918.9 | 1522849  | 1482311  | 627994.3 | 346580.8 | 1237979  |
| 1343732  | 1841275  | 227922.5 | 117534.9 | 418188   | 845107.1 | 59576.95 | 0        | 42816.76 | 426347.2 |
| 17999564 | 23038760 | 223249.2 | 20130.49 | 238176.3 | 2926508  | 21292311 | 56018707 | 89184.34 | 11041455 |
| 18154192 | 29246462 | 7837.217 | 59656.79 | 2558672  | 474615.4 | 7755830  | 69826594 | 0        | 9941226  |
| 574074.3 | 550134.8 | 134692.8 | 147904.8 | 265290.8 | 431944.2 | 372973.5 | 359008.7 | 1530503  | 175259.5 |
| 1063306  | 1290788  | 31083.78 | 64662.16 | 108494.1 | 643766.7 | 879379.9 | 369648.2 | 45263.07 | 419074.9 |
| 101213.4 | 57130.63 | 80154.14 | 67867.86 | 88543.95 | 333043.3 | 329793.9 | 107441   | 27208.8  | 71061.59 |
| 1015509  | 823517.9 | 312127.3 | 522539.4 | 719625.5 | 5372490  | 6208940  | 1324524  | 244533.1 | 34717    |
| 13864977 | 22360219 | 13554.91 | 0        | 227865.6 | 486221.6 | 7468775  | 53294733 | 33839.61 | 8285933  |
| 17994461 | 22345140 | 3320.483 | 24110.26 | 36546.51 | 3492299  | 22588507 | 51862057 | 773413.4 | 1270621  |
| 11328285 | 8228767  | 3540954  | 2907240  | 10892370 | 66026337 | 61569342 | 21267274 | 868780.5 | 5043048  |
| 2206321  | 1131472  | 301788.6 | 104362.1 | 369680.5 | 4119475  | 961805.7 | 3649898  | 784141.8 | 1569075  |
| 530297.4 | 593952.4 | 11617.7  | 11126.15 | 55045.6  | 78452.71 | 751025.6 | 575564.4 | 13179.13 | 472504.7 |
| 3168380  | 2579018  | 242481.9 | 167921.8 | 674006.6 | 3565384  | 3295965  | 2602181  | 200964.6 | 1397694  |
| 17655403 | 25087393 | 693843.5 | 1193231  | 7194851  | 82576.72 | 10372099 | 60762701 | 0        | 9315719  |
| 487254.6 | 317858.5 | 154459.8 | 46499.5  | 185677.2 | 85069.88 | 823278   | 588815.3 | 75456.55 | 287825.9 |
| 320871.4 | 166015.7 | 86814.24 | 101787.9 | 224947.4 | 388944.5 | 272761.1 | 400732.8 | 173783   | 309467.2 |
| 3531148  | 3106307  | 174265.8 | 44710.68 | 322627.7 | 860120.3 | 6040921  | 8829166  | 819569.6 | 2387198  |

|          |          |          |          |          |          |          |          |          |          |
|----------|----------|----------|----------|----------|----------|----------|----------|----------|----------|
| 35656248 | 58188263 | 0        | 0        | 0        | 846858.5 | 18564292 | 1.38E+08 | 0        | 20063640 |
| 183057.3 | 146784.9 | 68773.71 | 80688.74 | 329192.4 | 721942.8 | 551431.8 | 160284.4 | 16834.03 | 116759.5 |
| 749230.7 | 404860.3 | 0        | 0        | 15667.69 | 596287.9 | 1324141  | 1088221  | 159739.4 | 494015.1 |
| 60942.52 | 46398.28 | 21359.3  | 31837.23 | 156440.2 | 1375030  | 7546052  | 48777.18 | 24594.17 | 13120.26 |
| 11856860 | 17879907 | 17235.6  | 7689.882 | 0        | 635042.2 | 9468537  | 42460243 | 0        | 3958907  |
| 174015.2 | 103558.6 | 43820.81 | 28997.74 | 16262.18 | 77646.54 | 303591   | 126259.2 | 90002.81 | 147954.6 |
| 364736.2 | 222780.7 | 10981.75 | 4338.056 | 22488.7  | 478034   | 460615.7 | 399009.8 | 40683.56 | 315877   |
| 468173.4 | 370883.9 | 22488.1  | 16994.25 | 384820.2 | 3161376  | 3935394  | 1028673  | 22661.49 | 407977.5 |
| 36768390 | 58176723 | 422448.7 | 388081   | 1177264  | 4699283  | 18614981 | 1.4E+08  | 1324007  | 18517163 |
| 463049.3 | 380266   | 47646.91 | 21364.06 | 83094.77 | 571292.4 | 427580.8 | 782764.8 | 32550.83 | 68652.62 |
| 1191755  | 1194233  | 47992.37 | 51960.52 | 70718.37 | 1030676  | 1288212  | 769779.3 | 85183.41 | 411948.2 |
| 1644454  | 1219962  | 5482.693 | 0        | 3287.856 | 291194.8 | 3212264  | 1524295  | 378029   | 1513943  |
| 5284719  | 3786478  | 985644.4 | 242867.7 | 1502434  | 5581480  | 6192215  | 10077130 | 1137661  | 1969619  |
| 129527.8 | 94532.78 | 6046.597 | 8381.917 | 58487.35 | 87037.31 | 184596.1 | 148931.7 | 7457.329 | 78553.32 |
| 529417.4 | 464535   | 18173.68 | 0        | 10838    | 462986.7 | 709240.6 | 759645.3 | 93035.57 | 186325.2 |
| 3711861  | 4693896  | 105921.6 | 107104.5 | 153222.5 | 1468387  | 3662086  | 11425973 | 337442.3 | 1226565  |
| 339847.8 | 213449.1 | 0        | 8049.495 | 6200.513 | 0        | 711722.8 | 666865   | 271728.3 | 243464.5 |
| 113859   | 54876.75 | 8255.215 | 11407.66 | 44465.2  | 125317.4 | 157950.7 | 177237.4 | 77466.85 | 83747.61 |
| 11688289 | 17535709 | 0        | 8902.401 | 0        | 114954.1 | 10077313 | 41770969 | 0        | 4053584  |
| 6593131  | 9123405  | 912745.5 | 436193.5 | 2385408  | 1041169  | 3370923  | 22820244 | 912067.4 | 3230328  |
| 52382.97 | 41557.65 | 47128.5  | 51302.97 | 66115    | 1248062  | 256374.2 | 88098.01 | 24821.94 | 0        |
| 413473.1 | 398576.4 | 0        | 0        | 0        | 29105.97 | 736236.4 | 194940.3 | 108321.8 | 84083.41 |
| 6144704  | 8978160  | 0        | 0        | 0        | 318595.6 | 5650914  | 21500160 | 3952.393 | 2632697  |
| 305282.6 | 341249   | 0        | 0        | 2890.894 | 402334.6 | 131684.9 | 301814   | 52570.71 | 203235.5 |
| 2218846  | 2699081  | 2593.232 | 3548.941 | 1044143  | 964879.8 | 1651250  | 6361178  | 90211.7  | 764723.8 |
| 4242645  | 3778983  | 1004701  | 559898.1 | 2194449  | 174694.5 | 5926537  | 3269957  | 607749.2 | 2495644  |
| 24337863 | 33804778 | 0        | 85176.46 | 120027   | 496799.9 | 26725210 | 80314423 | 0        | 8485768  |
| 17198896 | 27991866 | 89693.63 | 5171.534 | 95597.78 | 133242.1 | 9521588  | 66585434 | 0        | 8445117  |
| 937847.9 | 189729.9 | 320286.7 | 1092183  | 1374373  | 1593941  | 2259904  | 1151163  | 654293.7 | 939702.9 |
| 8186678  | 11002175 | 181110.6 | 28060.79 | 110350.6 | 104889.9 | 9622747  | 26407400 | 0        | 3687138  |
| 1.34E+08 | 2.12E+08 | 1142808  | 632194.5 | 2308284  | 5596038  | 83380528 | 5.05E+08 | 0        | 49373227 |
| 3708348  | 5422312  | 21504.78 | 5353.967 | 0        | 7532.592 | 3547809  | 13063218 | 0        | 2006501  |
| 73687.78 | 43091.09 | 37447.77 | 7704.08  | 132089.2 | 6925.334 | 10663.48 | 74989.04 | 6918.711 | 64614.44 |
| 16544153 | 24825612 | 19517.73 | 0        | 22673.07 | 275465.6 | 14252904 | 59007407 | 8942.237 | 5577228  |
| 11634198 | 17187649 | 126744.7 | 0        | 0        | 1283950  | 9644730  | 40943312 | 4358.346 | 4105059  |
| 312571.7 | 232602.9 | 271422   | 322752.4 | 174931.9 | 1407676  | 871304.3 | 434273.7 | 92081.18 | 135348.1 |
| 215241.9 | 35919.53 | 127346   | 172017.4 | 179025.1 | 246132.9 | 208099.7 | 243721   | 186587.2 | 255305.7 |
| 3211345  | 2754200  | 296892   | 315733.8 | 1071440  | 2511949  | 3785570  | 4099109  | 206756.9 | 825533.4 |
| 10762997 | 16172165 | 39580.77 | 0        | 0        | 119088.4 | 9298476  | 38471176 | 20456.86 | 3704928  |
| 19873170 | 25803599 | 8831.55  | 29229.78 | 120195.5 | 1109700  | 25066392 | 60371554 | 0        | 7104663  |
| 1.06E+08 | 1.4E+08  | 3073527  | 2245396  | 34675438 | 6766637  | 97018544 | 3.27E+08 | 0        | 23508075 |
| 550256.3 | 344517.5 | 202921.9 | 68072.4  | 116738.9 | 265907.2 | 890829.2 | 676530.4 | 156519.6 | 225923.3 |
| 25726378 | 41011982 | 137914.4 | 219695.6 | 1433074  | 160929.5 | 15244564 | 97908042 | 0        | 14509371 |
| 2232318  | 3137683  | 48769.9  | 29579.76 | 222618.7 | 127399.3 | 2096629  | 7651464  | 0        | 1739121  |
| 33997411 | 18292117 | 782608.9 | 389288.8 | 3854939  | 8009079  | 68706621 | 55206461 | 7098910  | 29690235 |
| 10735651 | 16186502 | 0        | 0        | 113981.6 | 237986.6 | 9042198  | 38489248 | 5049.065 | 3651151  |
| 616397.6 | 539332.5 | 365897.4 | 364964.1 | 347788.2 | 2688343  | 4222055  | 974673.5 | 92575.49 | 401670   |

|          |          |          |          |          |          |          |          |          |          |
|----------|----------|----------|----------|----------|----------|----------|----------|----------|----------|
| 12422664 | 20830238 | 0        | 0        | 0        | 218393.7 | 5528162  | 49210708 | 0        | 7517984  |
| 20474105 | 28017743 | 121628.2 | 242407.8 | 2167770  | 554551.8 | 21672396 | 66878315 | 0        | 6894117  |
| 4634784  | 3276453  | 76792.01 | 85753.86 | 100598.6 | 2368610  | 8356711  | 7671060  | 469290.9 | 3012956  |
| 63879.13 | 68569.76 | 41409.24 | 39887.25 | 205019.6 | 291285.3 | 76716.51 | 64875.05 | 9653.89  | 0        |
| 71734223 | 1.33E+08 | 44783605 | 23850994 | 92627123 | 4.11E+08 | 3.61E+08 | 170171.8 | 51850974 | 162245.6 |
| 1251597  | 781524.7 | 46470.45 | 144848.3 | 339387.8 | 1590766  | 1434598  | 1599461  | 214979.7 | 651540.7 |
| 395615.9 | 355317.1 | 6393.001 | 5022.625 | 36838.39 | 4787142  | 17155229 | 720717.7 | 59679.46 | 245405   |
| 8442818  | 10958156 | 109075.4 | 118910   | 864888.5 | 418653.9 | 10029578 | 26595699 | 0        | 4311397  |
| 1835609  | 1153805  | 252681.5 | 105396.7 | 614786.1 | 2459207  | 1847678  | 2547260  | 381373.1 | 789811.7 |
| 127574.9 | 107497.9 | 34407.23 | 17347.65 | 32887.33 | 115854.5 | 129578   | 89628.68 | 37551.85 | 91415.59 |
| 6626509  | 8449287  | 45666.29 | 0        | 891925.7 | 878674.8 | 7715118  | 20754214 | 127028.7 | 1640439  |
| 11370927 | 19072934 | 0        | 0        | 0        | 119086.4 | 5244978  | 45053539 | 0        | 6935628  |
| 51421827 | 73555530 | 150909.4 | 0        | 394560.7 | 5091478  | 49526864 | 1.74E+08 | 0        | 3499982  |
| 5968118  | 4149537  | 33249.84 | 22101.48 | 94513.98 | 3245436  | 10801788 | 10285381 | 2066391  | 5805281  |
| 124095.9 | 70326.62 | 82735.93 | 130624.5 | 109213   | 481013.4 | 286871.7 | 125270.1 | 32485.6  | 78334.48 |
| 430965.2 | 323048.8 | 52754.16 | 203554.9 | 77968.05 | 176502.1 | 636077.3 | 557879.7 | 50180.82 | 192552.7 |
| 21623061 | 35107617 | 210640.5 | 127227.4 | 900478.9 | 554458.9 | 11529896 | 83548022 | 0        | 10526966 |
| 2.04E+08 | 1.18E+08 | 58690936 | 40997514 | 1.51E+08 | 34616673 | 3.15E+08 | 3.94E+08 | 78949176 | 1.79E+08 |
| 685017.6 | 724258.3 | 4763.198 | 4615.051 | 56928.62 | 92915.74 | 1084003  | 1887864  | 264826   | 481202.3 |
| 675362.2 | 823097.4 | 0        | 0        | 348503.9 | 273431.3 | 507136.4 | 1890856  | 23666.9  | 234908.5 |
| 1265224  | 635138.9 | 207530.5 | 171127.6 | 572230.9 | 438813.9 | 2241735  | 1846917  | 403372.3 | 869453.6 |
| 702528.9 | 931986.8 | 1253830  | 2888906  | 7237502  | 19377.69 | 260344.4 | 2245111  | 44181.55 | 924024.9 |
| 40882.42 | 57236.2  | 479802.4 | 2769031  | 107627.1 | 22001.16 | 6634.552 | 0        | 29743.05 | 141479.8 |
| 377764.2 | 582686.5 | 1160420  | 1461501  | 7569657  | 101020.8 | 68624.49 | 1401263  | 0        | 235995.8 |
| 867468.9 | 1416258  | 117138.1 | 203282.1 | 106148.1 | 25036.04 | 86155.36 | 60972.72 | 3348639  | 742551   |
| 396195.2 | 84751.55 | 46467.6  | 49850.17 | 72977.45 | 752734.8 | 235054.9 | 316639.7 | 427567.1 | 334233.1 |
| 29763521 | 49313003 | 0        | 17124.1  | 0        | 657577.3 | 15430396 | 1.17E+08 | 0        | 17601813 |
| 16061636 | 21738448 | 52007.36 | 35103.63 | 187798.6 | 990103.1 | 18698934 | 51146442 | 0        | 4608134  |
| 7099367  | 8268569  | 82935.69 | 70944.72 | 55827.49 | 739189   | 10483956 | 14419354 | 204577.2 | 2032522  |
| 3457903  | 2177036  | 0        | 5197.577 | 0        | 3866947  | 5130200  | 5525875  | 530092.7 | 2252808  |
| 1810437  | 1589325  | 30139.31 | 33144.37 | 280829.5 | 1594282  | 2317049  | 1411261  | 73106.81 | 870368.6 |
| 566256.6 | 856288.3 | 74663.65 | 93935.71 | 90508.12 | 124020.9 | 153986.6 | 133099.8 | 73137.65 | 70792.69 |
| 168605.1 | 163132.7 | 102530.7 | 69196.65 | 160934.3 | 827050.6 | 708751.7 | 254513.2 | 24466.49 | 66301.31 |
| 13517449 | 20572935 | 0        | 0        | 0        | 329893.9 | 11408600 | 48787714 | 0        | 4229811  |
| 5683526  | 8716686  | 46403.13 | 8846.954 | 0        | 291365.6 | 4469917  | 20889675 | 24555.97 | 4466624  |
| 586069.3 | 370829   | 62886.91 | 8942.039 | 216875.6 | 136115.6 | 1071174  | 594110.8 | 295271.9 | 202539.9 |
| 11173498 | 3927112  | 5873911  | 95912624 | 25744688 | 10599471 | 17070487 | 11348735 | 5737716  | 14289009 |
| 127264.5 | 202535.5 | 348270.1 | 169460.6 | 877669.9 | 52267.1  | 163270.8 | 485681.8 | 0        | 55649.52 |
| 5941626  | 7177547  | 260142.2 | 221640.6 | 643873.9 | 4236874  | 4694349  | 2931345  | 423270   | 1661350  |
| 27570311 | 45527366 | 15902.8  | 8544.809 | 58681.01 | 770085.4 | 14700737 | 1.08E+08 | 0        | 14063986 |
| 117390.1 | 95471.33 | 35236.97 | 6102.998 | 52399.8  | 20126.22 | 177903.9 | 193579.7 | 8111.657 | 24546.03 |
| 16900561 | 23941645 | 12056.53 | 0        | 185475.6 | 566187   | 18037303 | 56692187 | 0        | 4843250  |
| 7573822  | 9944472  | 1222046  | 762476.9 | 4038406  | 200288   | 4814840  | 24589123 | 24356.63 | 5042990  |
| 12876819 | 19318261 | 15937.45 | 0        | 0        | 197600.6 | 11685445 | 45898992 | 0        | 4108047  |
| 33645253 | 51363736 | 4007976  | 2141923  | 2477084  | 4522754  | 17430113 | 1.22E+08 | 609727.9 | 172430.5 |
| 6760496  | 8119215  | 102309.8 | 70047.06 | 1338855  | 1804865  | 7912190  | 20696727 | 1343021  | 2445168  |
| 72921512 | 1.22E+08 | 146529.8 | 84225.12 | 1011034  | 2311883  | 35326760 | 2.88E+08 | 47060.82 | 36376425 |

|          |          |          |          |          |          |          |          |          |          |
|----------|----------|----------|----------|----------|----------|----------|----------|----------|----------|
| 16555495 | 30828420 | 101865.3 | 128057.5 | 32803.99 | 59129.87 | 162553.1 | 24300.76 | 71405394 | 7900913  |
| 42981508 | 62074159 | 147892.7 | 145589.2 | 652745.8 | 1467495  | 43106296 | 1.47E+08 | 0        | 12404529 |
| 72481189 | 1.06E+08 | 7592030  | 2498788  | 23929798 | 1100160  | 42034545 | 2.55E+08 | 37558.57 | 24272722 |
| 21820360 | 32241123 | 22134.36 | 32819.64 | 76632.96 | 713805.6 | 20620801 | 76483077 | 5945.051 | 6276088  |
| 539790.3 | 808871   | 114712.6 | 124098   | 128843.7 | 99724.94 | 73268.1  | 15522.5  | 1892830  | 697437.1 |
| 13089195 | 20929402 | 277230.4 | 44244.8  | 208366.7 | 786672.1 | 7971259  | 50189934 | 0        | 7560540  |
| 242674.8 | 208487.9 | 0        | 0        | 7760.808 | 93588.96 | 423175.2 | 344809.3 | 49939.07 | 314779.8 |
| 8159398  | 11556583 | 0        | 0        | 0        | 409573   | 8725088  | 27577400 | 0        | 3347803  |
| 5615120  | 1290826  | 4205730  | 5580191  | 5693988  | 3345499  | 5173468  | 7777044  | 4350157  | 5030358  |
| 1133045  | 2119540  | 0        | 3562.029 | 0        | 4656.796 | 4538.667 | 13816.19 | 377304.3 | 4911798  |
| 20276822 | 28399641 | 1545055  | 2396454  | 3055416  | 8205351  | 10150952 | 6244183  | 3051495  | 6010449  |
| 9139909  | 12087211 | 8355.31  | 31052.29 | 7652561  | 2016113  | 3256547  | 26480422 | 268789   | 1283677  |
| 847445.4 | 651876.5 | 123951.2 | 323873.9 | 352230.5 | 621076.4 | 961950.2 | 1227477  | 68936.29 | 319533.3 |
| 3128745  | 3363639  | 544215   | 90387.44 | 362593.7 | 680018.4 | 4323683  | 8566091  | 173835.3 | 892672.1 |
| 25597768 | 29304290 | 281253.7 | 135516.8 | 768542.3 | 18742755 | 26323712 | 42170726 | 3638500  | 7273985  |
| 18549701 | 32241768 | 15619    | 0        | 0        | 228041.5 | 6447901  | 75737066 | 0        | 9082062  |
| 432810.2 | 445260   | 69268.45 | 103700.6 | 82828.87 | 310003.8 | 381515.7 | 208659   | 72929.09 | 175704.5 |
| 1948106  | 1632302  | 1066872  | 1492217  | 1211646  | 1134975  | 430332   | 1800864  | 521811.7 | 790807.7 |
| 415851.7 | 286277.9 | 33956.69 | 14773.2  | 78295.19 | 772116.4 | 112672.6 | 834842.3 | 133726.4 | 261456   |
| 212991.6 | 322220.5 | 17393.19 | 20644.74 | 110844.3 | 3072370  | 14317692 | 17550.24 | 8014.646 | 106977.7 |
| 2517074  | 2047261  | 448201.4 | 94163.33 | 1328168  | 767942.2 | 3700632  | 5696684  | 299820.4 | 1223586  |
| 4507855  | 6804457  | 20234.65 | 17502.4  | 10108.45 | 174663.9 | 3936383  | 16425304 | 13958.19 | 2265206  |
| 140422.5 | 55973.45 | 196250.9 | 221485.3 | 36521.8  | 431654.5 | 205707.3 | 219443.7 | 155647.9 | 108099.9 |
| 23504221 | 37352909 | 192082.9 | 109396.5 | 733025   | 676721.1 | 15705050 | 89201191 | 0        | 10307911 |
| 6014372  | 8483086  | 422182.2 | 601016   | 833814.2 | 2425979  | 3123021  | 1877017  | 694148.4 | 1695147  |
| 35577479 | 58885512 | 18669.52 | 5168.696 | 231119.4 | 858702.4 | 19464131 | 1.4E+08  | 3473.659 | 20175478 |
| 157070.1 | 107575.4 | 21183.63 | 2714.196 | 119356.6 | 991639.4 | 1235447  | 307891   | 14595.14 | 131376.3 |
| 191656.8 | 221243   | 11342.48 | 26577.78 | 19246.35 | 177228.1 | 119666.3 | 106786.8 | 9002.758 | 63166.93 |
| 398951.4 | 587376   | 35793.51 | 50762.2  | 16840.07 | 37396.37 | 280212.7 | 179176.5 | 10807.14 | 70516.63 |
| 135734.1 | 119542.9 | 35528.27 | 47839.24 | 61606.3  | 114839.4 | 95316.68 | 327820.5 | 49295.04 | 42675.94 |
| 29174244 | 45376360 | 513553   | 158915   | 357584.8 | 322684.5 | 22605327 | 1.09E+08 | 0        | 16732546 |
| 12561211 | 22186487 | 0        | 0        | 0        | 0        | 3789877  | 51764187 | 0        | 8469521  |
| 242940.3 | 215894.4 | 19852.07 | 5456.122 | 89273.43 | 134710.5 | 330987.8 | 452869.8 | 26092.13 | 6724.448 |
| 2504731  | 1315299  | 494757.1 | 270516.7 | 1243025  | 1880766  | 3829795  | 2291763  | 604289.6 | 2123193  |
| 5292769  | 3338625  | 363597.3 | 534898.2 | 832366.2 | 2741965  | 9408392  | 8266769  | 760614.9 | 2975058  |
| 686762.1 | 1535647  | 825143.4 | 1591875  | 1481663  | 1670560  | 2020337  | 0        | 0        | 0        |
| 31225582 | 53120535 | 12944.34 | 0        | 108368.2 | 597141.6 | 13971765 | 1.25E+08 | 5145.997 | 19364598 |
| 1.48E+08 | 1.92E+08 | 663442.3 | 850965.8 | 32825433 | 6517560  | 1.69E+08 | 4.51E+08 | 12269.33 | 29025982 |
| 98623523 | 1.59E+08 | 162814.1 | 18547.43 | 730265.8 | 1730086  | 66539081 | 3.78E+08 | 0        | 40859156 |
| 37498029 | 70451694 | 106826.4 | 149574.7 | 165361.1 | 127659.2 | 97743.04 | 756542.7 | 21788459 | 1.62E+08 |
| 451437.5 | 356403   | 325313.8 | 377926.3 | 98839.33 | 196887.5 | 291492.3 | 1080798  | 323789.4 | 229925.6 |
| 7477651  | 10170592 | 20746.92 | 112710.2 | 138838.7 | 1320600  | 8064202  | 24360506 | 190233   | 1983009  |
| 4.64E+08 | 3.03E+08 | 60348065 | 17524286 | 3.12E+08 | 62339490 | 7.8E+08  | 6.48E+08 | 85858462 | 1.96E+08 |
| 9444415  | 15910357 | 18049.78 | 8342.343 | 0        | 383074.6 | 4516479  | 37606879 | 0        | 4500216  |
| 2741238  | 3513134  | 333331.9 | 497171.4 | 589466.1 | 1316897  | 1609546  | 1110922  | 507460   | 926554.6 |
| 235756.7 | 164427   | 3813.461 | 7041.598 | 154028   | 1650514  | 1863512  | 496217.2 | 219374.8 | 98027.02 |
| 11646606 | 17489059 | 10200.7  | 49395.81 | 77226.74 | 846764.4 | 10231822 | 41592725 | 44812.84 | 3602104  |

|          |          |          |          |          |          |          |          |          |          |
|----------|----------|----------|----------|----------|----------|----------|----------|----------|----------|
| 156114.5 | 180613.2 | 58851.96 | 76297.67 | 340545.2 | 2175265  | 491280   | 155824   | 14051.16 | 30240.88 |
| 7410180  | 9097989  | 53549.61 | 36425.24 | 356959   | 521459.6 | 10366379 | 20040755 | 0        | 2083473  |
| 524203.4 | 361292.1 | 787215.2 | 464743.7 | 3210557  | 63662.76 | 1430116  | 1164429  | 361610.2 | 316363.6 |
| 23059090 | 37069371 | 224701   | 115276.9 | 319447.1 | 419862.6 | 15360617 | 88348256 | 0        | 10452020 |
| 366626.2 | 262906.8 | 43449.17 | 81737.78 | 103566.2 | 76606.91 | 632946.7 | 656643.2 | 39378.68 | 260705.4 |
| 4336195  | 7068717  | 0        | 0        | 172163.2 | 97441.82 | 2595502  | 16845807 | 169547.2 | 2138260  |
| 14932509 | 25012240 | 97441.37 | 1912.995 | 0        | 317355.8 | 7770491  | 59036580 | 0        | 10069847 |
| 519161   | 412109.9 | 219225.2 | 184522.2 | 1195140  | 4006092  | 23618392 | 428157   | 87744.36 | 215538.8 |
| 9884247  | 15991553 | 49283.54 | 21172.66 | 18611.38 | 285611.2 | 6428065  | 38027819 | 0        | 4208395  |
| 56899722 | 35857858 | 236829.4 | 90604.15 | 962745.6 | 37905230 | 1.03E+08 | 89867911 | 21522770 | 59561746 |
| 701629.6 | 544962.2 | 350525.7 | 214449.6 | 1125432  | 2869241  | 2193655  | 1276677  | 159338.7 | 346540.7 |
| 15185061 | 9758607  | 2725128  | 1934541  | 5720232  | 5038450  | 25999488 | 21810278 | 342679.7 | 12000241 |
| 11319494 | 17855249 | 206748.7 | 212436   | 1040792  | 324626.8 | 7254036  | 42813840 | 21477.49 | 7729943  |
| 24820368 | 39074637 | 352531   | 134068.9 | 1191909  | 559235.4 | 17602536 | 93290648 | 0        | 10887762 |
| 299445.6 | 189786.2 | 94341.06 | 123780.8 | 128731   | 58609.12 | 468510.4 | 430816.4 | 84189.72 | 159782.4 |
| 111236.4 | 98960.92 | 18971.88 | 25225.15 | 0        | 52471.85 | 164088.9 | 272712.7 | 10894.05 | 57809.4  |
| 1890242  | 1144581  | 2678.037 | 0        | 0        | 1909786  | 3042274  | 2881507  | 220649.5 | 1346898  |
| 11296021 | 15542024 | 216298.3 | 69494.72 | 442111.1 | 300366.4 | 12968365 | 37221009 | 3831.728 | 4172593  |
| 12795970 | 22030027 | 51678.93 | 8453.322 | 0        | 375847.9 | 5164493  | 51745258 | 0        | 8293279  |
| 25942068 | 37384757 | 2294909  | 1414059  | 10063701 | 89912.07 | 16254532 | 90136853 | 0        | 11610363 |
| 2.12E+08 | 1.37E+08 | 27610402 | 8008583  | 1.46E+08 | 26603832 | 3.56E+08 | 2.95E+08 | 40126632 | 90014846 |
| 87846581 | 1.02E+08 | 4860298  | 4135150  | 11801096 | 65842396 | 74515432 | 46888946 | 8399900  | 28552100 |
| 12681320 | 21143192 | 40571.21 | 66926.21 | 438422.2 | 1322824  | 5517719  | 50021857 | 33574.23 | 8557999  |
| 344436.9 | 513084.6 | 9750.989 | 11541.26 | 21070.13 | 128161.4 | 188293   | 90059.25 | 18132.66 | 79084.79 |
| 14761373 | 24848273 | 0        | 0        | 237518.6 | 355279.8 | 7338267  | 58675086 | 39119.3  | 8767825  |
| 124125.1 | 114330.8 | 97052.04 | 131192.6 | 128288.5 | 316477.2 | 358028.4 | 97312.15 | 50186.94 | 14603.82 |
| 2510340  | 1893087  | 90416.1  | 28708.44 | 3323614  | 191736   | 2767318  | 2181258  | 327350.5 | 1146042  |
| 40947317 | 56467785 | 29231.36 | 44414.14 | 493450.5 | 1697683  | 48039910 | 1.33E+08 | 0        | 12291377 |
| 1121490  | 1135518  | 64932.75 | 32181.7  | 24102.16 | 117743.9 | 1895705  | 2305902  | 83783.99 | 482000.6 |
| 789531.2 | 434572.5 | 101156.2 | 59599.33 | 232719.4 | 909756.9 | 1059656  | 1222624  | 209512.7 | 491615.7 |
| 4170190  | 6852821  | 11924.91 | 13416.07 | 46888.65 | 237076.9 | 2367318  | 16253990 | 11587.4  | 2609304  |
| 13764164 | 21624840 | 59891.77 | 26044.69 | 458723.1 | 251428.7 | 10383748 | 51813876 | 4414.097 | 7327588  |
| 45514687 | 71639834 | 171051.3 | 129941.7 | 1034056  | 1089703  | 34265553 | 1.71E+08 | 0        | 19926744 |
| 118499.1 | 95967.11 | 57179.1  | 44107.61 | 215236.1 | 1188920  | 349184.4 | 145460.6 | 4311.15  | 31475.77 |
| 1409795  | 791724.2 | 286361.9 | 161804.2 | 899968.5 | 676682.8 | 2219135  | 1469094  | 386088.8 | 922594.6 |
| 17463736 | 23232576 | 1818399  | 2649509  | 4074312  | 7394971  | 9828839  | 6202598  | 3404435  | 5595271  |
| 9004344  | 13869536 | 59300.88 | 44163.9  | 1008491  | 221000.9 | 6752997  | 33338712 | 0        | 5890924  |
| 10301504 | 13376493 | 97437.37 | 9687.074 | 52436.75 | 271192   | 13826324 | 30970098 | 33146.06 | 3337830  |
| 23911110 | 33993570 | 2115883  | 3251627  | 3706978  | 9106025  | 11467394 | 7377271  | 4035833  | 6700025  |
| 1.53E+08 | 1.2E+08  | 34043465 | 11095125 | 69721876 | 11145600 | 2.53E+08 | 3.2E+08  | 31455732 | 59252731 |
| 12272596 | 18941642 | 4266.129 | 2610.132 | 450723.4 | 412996.8 | 9957093  | 45524740 | 3598.329 | 6918310  |
| 774840.2 | 433179.1 | 101269.1 | 52824.19 | 216953.8 | 894034.4 | 1040388  | 1241497  | 199215.1 | 487182.4 |
| 7704269  | 11099745 | 594339.9 | 884266.5 | 1136062  | 2939498  | 3623618  | 2445008  | 1106542  | 2013599  |
| 1699284  | 2424203  | 25695.29 | 26569.77 | 57822.93 | 332703.8 | 1557154  | 5706178  | 50143.29 | 324491.6 |
| 700711.1 | 803263.5 | 208887.5 | 312989.8 | 143415   | 569048.5 | 129092.4 | 897885.8 | 29845.57 | 112259   |
| 49455031 | 82299458 | 170712   | 122623.2 | 838001.5 | 770820.3 | 27614016 | 1.95E+08 | 0        | 23959684 |
| 2585292  | 409356.3 | 1766360  | 1858252  | 1892838  | 3134320  | 2510448  | 2795105  | 2149553  | 2525837  |

|          |          |          |          |          |          |          |          |          |          |
|----------|----------|----------|----------|----------|----------|----------|----------|----------|----------|
| 740792.9 | 725164.7 | 2846.555 | 0        | 42083.63 | 902725.5 | 655919.4 | 1722454  | 6666.826 | 52675.3  |
| 2649020  | 2784165  | 83792.54 | 26500.91 | 179519.1 | 1050663  | 3856091  | 7247924  | 579413.7 | 1014256  |
| 290836.2 | 227388.3 | 47473.06 | 51000.77 | 59329.69 | 278060.5 | 348351.8 | 184853.9 | 81162.54 | 115753.6 |
| 705965.4 | 723565.9 | 330389.6 | 48717.51 | 155306.4 | 703338.3 | 332041.3 | 206202.6 | 3693.941 | 1370973  |
| 4055869  | 3286854  | 514911.3 | 171349.7 | 1278185  | 5274939  | 3301597  | 3540376  | 671948.1 | 2310248  |
| 682196.5 | 280883   | 6892.274 | 0        | 22645.6  | 23962.05 | 1512810  | 599806.6 | 263782   | 666551.8 |
| 932265.1 | 558223.4 | 355671.9 | 148107.8 | 434304.3 | 377852.5 | 1470792  | 903286.8 | 218852.7 | 580173.9 |
| 33517915 | 55529130 | 71538.01 | 39059.56 | 470943.6 | 1771082  | 18572195 | 1.32E+08 | 16174.92 | 17842165 |
| 203634.6 | 202982.4 | 67171.12 | 24057.22 | 198281.2 | 1644403  | 987103.5 | 523478.2 | 64419.63 | 115413.9 |
| 3023506  | 2575072  | 195921.7 | 173208.1 | 523678.3 | 3361482  | 3271058  | 2404098  | 276127.6 | 1037267  |
| 1687200  | 1836995  | 168333.5 | 124354.1 | 641380.6 | 904269.8 | 1635983  | 4750661  | 230469.1 | 303719.2 |
| 159058.3 | 75497.09 | 23275.99 | 44422.76 | 63346.07 | 164951.9 | 220409   | 213519.7 | 183588.7 | 70150.95 |
| 23691776 | 34310836 | 26867.67 | 0        | 260402.5 | 1128070  | 24722199 | 81078432 | 0        | 6370283  |
| 35452600 | 21008956 | 1271541  | 928797.8 | 5062486  | 28595459 | 60134260 | 52121295 | 5428509  | 21574244 |
| 459742   | 857128.3 | 5362.794 | 10232.03 | 4135.919 | 9602.324 | 19341.24 | 105877.1 | 0        | 140150   |
| 16026639 | 22175224 | 9012.543 | 0        | 0        | 886508.5 | 18949455 | 52518929 | 0        | 5106353  |
| 3213515  | 2016722  | 90719.23 | 12496.19 | 386056.1 | 1314050  | 6165950  | 5291857  | 475776.8 | 1776572  |
| 1069672  | 869706.7 | 0        | 0        | 9634.995 | 387149   | 1971071  | 2020377  | 272343.9 | 1125392  |
| 10411522 | 9087335  | 1449903  | 273506.9 | 2449249  | 5120543  | 15607864 | 24681729 | 67387.63 | 5993499  |
| 537572.9 | 483736.7 | 46414.93 | 26215.04 | 94973.35 | 759506.6 | 339316.7 | 1096180  | 35165.15 | 50391.62 |
| 1.61E+08 | 2.63E+08 | 477055.5 | 122570.4 | 2928436  | 6487135  | 1.01E+08 | 6.23E+08 | 21144.6  | 58493791 |
| 2318666  | 1582542  | 13123.12 | 0        | 35074.68 | 1345311  | 4256571  | 3888422  | 807980.5 | 2627736  |
| 1340072  | 627179   | 307576.1 | 308135.2 | 475519.3 | 1443653  | 1835969  | 1923416  | 652433.5 | 794225.3 |
| 140562   | 120321.2 | 67292.37 | 58198.72 | 227434.8 | 833722.5 | 384189.2 | 147322.8 | 5941.344 | 41603.3  |
| 31640950 | 40606314 | 5032352  | 281817.3 | 14155946 | 4272864  | 26388686 | 99865746 | 200000.6 | 18907069 |
| 1441703  | 1959352  | 10035.16 | 5029.433 | 60482.01 | 376635.5 | 1489743  | 4845978  | 12690.8  | 255337.7 |
| 632432   | 410089.7 | 78772.04 | 183600.1 | 225987.5 | 778980.9 | 635885.6 | 1259497  | 199003.7 | 360851.8 |
| 19416626 | 13798299 | 4453183  | 2587943  | 7221415  | 6150956  | 31814578 | 37849506 | 4040072  | 7608517  |
| 432549.6 | 321543.4 | 266818.9 | 128625.6 | 121114.7 | 517716.2 | 228022.7 | 367691.5 | 289201.5 | 995253.6 |
| 20987424 | 30189273 | 3854.907 | 4204.847 | 223411.3 | 1101289  | 22433687 | 71364201 | 0        | 5986080  |
| 7892363  | 11625275 | 93156.5  | 0        | 209429.8 | 165832.8 | 7891170  | 27963237 | 0        | 3734014  |
| 11085178 | 14397366 | 53863.77 | 39808.2  | 283154.1 | 286053.1 | 14932076 | 33656439 | 0        | 3999044  |
| 371409.9 | 370131.4 | 2114.013 | 7554.099 | 109760.7 | 442552.1 | 257839.4 | 981213.5 | 9571.1   | 191720   |
| 3934441  | 3095142  | 1171113  | 344113.8 | 1352801  | 1121223  | 6160426  | 8436426  | 391063.5 | 2677064  |
| 2087757  | 2473552  | 24095.79 | 2292.606 | 51320.73 | 989114.4 | 2553045  | 6281113  | 31968.29 | 1598095  |
| 14470413 | 23552521 | 0        | 0        | 0        | 159689.3 | 10058803 | 55782361 | 0        | 11191729 |
| 830538.7 | 562956.1 | 0        | 0        | 0        | 830538.5 | 1301074  | 1443774  | 99160.09 | 530237   |
| 684950.3 | 836331.1 | 215947.4 | 286852.6 | 240291.1 | 410111.8 | 74258.53 | 413469.1 | 49731.39 | 629165.8 |
| 48495092 | 7495416  | 28236807 | 40076389 | 36708619 | 59294456 | 44393502 | 51122897 | 39261856 | 44467907 |
| 1120774  | 728366.1 | 146871.5 | 68476.23 | 464156.8 | 264288.5 | 2008555  | 1391621  | 153722.8 | 582299.2 |
| 122480.1 | 113998   | 116159.4 | 558858.3 | 340619.2 | 94904.42 | 88791.32 | 48418.37 | 110928.5 | 317796.4 |
| 773528.5 | 918171.7 | 99552.55 | 121304.8 | 139117.9 | 375684.4 | 689755.2 | 331803.6 | 135909.8 | 191292.4 |
| 665681.7 | 410332.5 | 311196.8 | 182741.3 | 157771.5 | 150555.1 | 1109588  | 429900.8 | 288939.9 | 777238.7 |
| 166072.2 | 123358.4 | 99887.02 | 113095.9 | 105938.6 | 632454.9 | 773147.8 | 321975.6 | 72150.14 | 99743.6  |
| 30570021 | 37067309 | 1482880  | 1333981  | 3802221  | 21901008 | 25101296 | 15463096 | 2641229  | 9290373  |
| 29583301 | 49882200 | 43246.87 | 92976.81 | 1854756  | 251325.5 | 14897330 | 1.18E+08 | 0        | 17027376 |
| 42049775 | 61108530 | 0        | 31002.51 | 425173.9 | 2003789  | 44210449 | 1.45E+08 | 0        | 12381102 |

|          |          |          |          |          |          |          |          |          |          |
|----------|----------|----------|----------|----------|----------|----------|----------|----------|----------|
| 13042323 | 22306769 | 0        | 0        | 0        | 152573.9 | 6601101  | 52439545 | 0        | 8555125  |
| 6065393  | 9088127  | 71097.19 | 5913.985 | 30114.18 | 220185.1 | 5822888  | 21987887 | 238646.9 | 2769298  |
| 7048091  | 7946830  | 1784004  | 512413.7 | 991052.9 | 1225570  | 8910306  | 19729861 | 76360.52 | 9777649  |
| 1400090  | 995958.2 | 653701.2 | 405477.8 | 2278764  | 12502255 | 4289731  | 2029123  | 66826.14 | 600419.3 |
| 355611.6 | 68089.64 | 241610.3 | 483557.1 | 783932.4 | 492522.1 | 330176.1 | 297753.6 | 314332.5 | 320790.8 |
| 5443578  | 3505250  | 384088.5 | 441580.9 | 2121511  | 4720517  | 7954457  | 8720043  | 206876.8 | 4551164  |
| 1493657  | 1107336  | 0        | 6763.082 | 15276.75 | 542861.6 | 2859990  | 2021878  | 304977.1 | 1966944  |
| 8382146  | 14565326 | 33416    | 0        | 222979.7 | 68161.13 | 3516671  | 34220143 | 0        | 4322217  |
| 1690659  | 1029053  | 347563.7 | 221062.2 | 1561836  | 8317546  | 13383115 | 1642378  | 339786.1 | 1075690  |
| 25577211 | 13521824 | 572067   | 235058   | 2934273  | 4874791  | 53377321 | 38622459 | 5156018  | 23666029 |
| 11011191 | 15209728 | 2881338  | 1490624  | 7701401  | 158529.8 | 2869951  | 37189924 | 0        | 6572746  |
| 47851442 | 69374146 | 293983.6 | 74492.13 | 864459.2 | 2309028  | 50421034 | 1.65E+08 | 0        | 13685632 |
| 269322.4 | 289437.2 | 0        | 0        | 12687.08 | 201576.3 | 323680   | 735973.1 | 9442.157 | 51452.78 |
| 753655.1 | 396303.3 | 215869.9 | 99158.87 | 376640.3 | 270465.3 | 1290303  | 1056531  | 193262.7 | 513166   |
| 119955.2 | 124563   | 9296.34  | 2475.792 | 4109.511 | 30991.45 | 188972.7 | 315624.1 | 6633.245 | 17202.27 |
| 2071527  | 2228215  | 116710.4 | 56242.61 | 307540.8 | 1767117  | 2024021  | 1128460  | 202515.5 | 765054.1 |
| 12804869 | 18356007 | 207210.1 | 133109.2 | 731401.7 | 557460.7 | 13421471 | 44959224 | 643390.5 | 8845904  |
| 1399064  | 766820.8 | 0        | 4433.598 | 9592.437 | 183258.5 | 3011706  | 2056719  | 306237.4 | 1369890  |
| 2279111  | 803553.2 | 303630.4 | 470910.3 | 116855.3 | 434976.2 | 4722196  | 3509928  | 1407091  | 1798218  |
| 31525985 | 52184292 | 148019.2 | 103769.2 | 794936.4 | 1103996  | 18913315 | 1.24E+08 | 0        | 11782197 |
| 1805068  | 2785928  | 467994.2 | 461592.8 | 538486.5 | 249914.8 | 49106    | 48182.04 | 6539290  | 2122594  |
| 302009.9 | 190335.7 | 184315.8 | 107178   | 209379.5 | 100157.4 | 367834.5 | 590654.2 | 79400.51 | 361715.8 |
| 561102.4 | 540271.4 | 23602.36 | 33813.32 | 64788.17 | 582253.5 | 576458   | 225703.3 | 70323.83 | 256392.3 |
| 342314   | 330542.1 | 50343.65 | 3222.27  | 76546.47 | 76305.11 | 534068.1 | 911908.1 | 93715.7  | 152929   |
| 39018230 | 56619399 | 29496.45 | 0        | 315801.5 | 2041042  | 41653065 | 1.34E+08 | 0        | 11134992 |
| 788072.7 | 765442.4 | 1641542  | 927948.4 | 3742240  | 239119.4 | 1173122  | 2134021  | 211446   | 570311.8 |
| 4574434  | 5271402  | 1068484  | 795981.3 | 2215248  | 2091923  | 2916414  | 5736519  | 29683.69 | 13207831 |
| 167368.8 | 150308.2 | 61797.8  | 79782.05 | 102823.4 | 3425097  | 938896.9 | 214598.7 | 0        | 45548.63 |
| 839067.1 | 214108.2 | 432355.1 | 400647.5 | 1020817  | 3361606  | 2401798  | 851551.1 | 469106.4 | 1000405  |
| 14561904 | 23450814 | 29905.86 | 2871.826 | 153590.5 | 310323.5 | 10813056 | 55856411 | 0        | 6767800  |
| 12499396 | 19584251 | 114446.3 | 108883.6 | 1124911  | 377319.3 | 9402050  | 46914791 | 18895.38 | 7208151  |
| 9847349  | 5787506  | 327570.7 | 244366.1 | 1382882  | 9426900  | 15858406 | 14257828 | 1600919  | 5877746  |
| 120108.8 | 73185.31 | 2492.591 | 1781.695 | 3750.136 | 120434.6 | 193414.5 | 194859.8 | 6343.748 | 102469.5 |
| 5375008  | 7557272  | 614886.1 | 836368.1 | 1017954  | 2104539  | 2615731  | 1856662  | 911664.9 | 1576717  |
| 22890719 | 31989477 | 2158290  | 3230592  | 4012863  | 8959659  | 12692964 | 7423542  | 3994445  | 6883485  |
| 561814.4 | 754909.3 | 10934.14 | 0        | 111028.8 | 121348.5 | 561994.3 | 1885516  | 0        | 223070.3 |
| 1775192  | 324349.6 | 1353174  | 1602316  | 1489626  | 1873772  | 1629534  | 2117994  | 1575563  | 1579151  |
| 1872602  | 1206840  | 15527.93 | 19125.9  | 144251.8 | 1232440  | 3380372  | 2587813  | 213861.3 | 1100259  |
| 1398301  | 526196.3 | 603034.8 | 539968.6 | 752598.4 | 1119022  | 2023003  | 1926155  | 584228   | 1271529  |
| 8501181  | 12573555 | 671167.4 | 973303.6 | 1230974  | 3241360  | 3696259  | 2445302  | 1113247  | 2361099  |
| 3713787  | 842002   | 2255105  | 3023644  | 2760497  | 4401953  | 3316388  | 3521946  | 3138991  | 3087178  |
| 2577568  | 3012511  | 1851145  | 2528472  | 13996216 | 1972843  | 7454766  | 7779683  | 71192.04 | 2154622  |
| 206491   | 229050.3 | 62250.46 | 15426.38 | 113483   | 34223.26 | 198227.1 | 603935.1 | 29973.69 | 78282.46 |
| 26227981 | 43629059 | 700022.8 | 223303.2 | 179485.3 | 4715993  | 11923011 | 1.03E+08 | 106892.1 | 16273267 |
| 929726.7 | 271723.2 | 478071.7 | 655483.2 | 577073.7 | 1145128  | 872594.6 | 781962.4 | 622754.3 | 917790.3 |
| 139775.8 | 140571.3 | 84206    | 192857.9 | 379953.2 | 1883526  | 144924.6 | 132133   | 62142.22 | 38734.37 |
| 46953003 | 68127539 | 0        | 0        | 301833.6 | 2184743  | 50941895 | 1.61E+08 | 9767.402 | 13162947 |

|          |          |          |          |          |          |          |          |          |          |
|----------|----------|----------|----------|----------|----------|----------|----------|----------|----------|
| 5563542  | 7312260  | 231154.9 | 189087.7 | 610000.3 | 3436482  | 4109026  | 2504978  | 421829.4 | 1468632  |
| 113158.8 | 96762.6  | 12919.23 | 2454.385 | 43397.18 | 52458.95 | 168602.3 | 115500.6 | 17859.47 | 55100.23 |
| 443437.7 | 433052.8 | 46012.14 | 38419.38 | 72684.1  | 399861.1 | 466574.6 | 221045.8 | 55664.96 | 118198.8 |
| 2633948  | 3571119  | 0        | 0        | 2355120  | 553838.3 | 854865   | 7839399  | 33980.46 | 305501.1 |
| 10581894 | 5317455  | 2441217  | 2962324  | 8013775  | 12185659 | 10590153 | 18552670 | 6597523  | 9926996  |
| 964559.8 | 946275.1 | 781552   | 452613.1 | 1963726  | 3581294  | 1800455  | 789381.4 | 106966.4 | 472944.9 |
| 2399203  | 2667018  | 127542.7 | 203176.3 | 65147.59 | 1409550  | 2897903  | 6680190  | 840720.7 | 721613.7 |
| 221167.9 | 263370.9 | 24360.09 | 40679.96 | 86836.66 | 105172.1 | 161038.3 | 677976.2 | 13912.83 | 79856.35 |
| 40537795 | 56190813 | 74875.62 | 62614.12 | 730799.9 | 3739524  | 47650343 | 1.33E+08 | 0        | 12132001 |
| 7030682  | 6354628  | 777191.4 | 831898.3 | 2372941  | 6265418  | 7393058  | 17860195 | 1771760  | 3391095  |
| 1443901  | 855413.3 | 319213   | 358406.9 | 323434.2 | 321056.9 | 2647508  | 2306699  | 223488.1 | 1092071  |
| 204207.2 | 263390.8 | 0        | 2938.887 | 0        | 27620.16 | 272263.7 | 653426.7 | 0        | 29563.2  |
| 10232133 | 6371732  | 334088.7 | 206447.5 | 1315629  | 7405536  | 17944003 | 15094649 | 1324395  | 5889904  |
| 77447749 | 1.13E+08 | 7961251  | 4117676  | 28409676 | 394375.8 | 52755005 | 2.71E+08 | 0        | 31994651 |
| 1137399  | 760054   | 878511.7 | 151932.5 | 1741144  | 352008.4 | 91435.6  | 1843811  | 596153.4 | 919829.4 |
| 41489877 | 61258527 | 0        | 9635.932 | 241360.7 | 1838714  | 43368495 | 1.46E+08 | 0        | 12774961 |
| 21480634 | 26102378 | 624058   | 640146.9 | 6038903  | 623234   | 28263237 | 61004371 | 4138.107 | 6653002  |
| 88327.36 | 48863.22 | 7445.913 | 2655.871 | 10788.97 | 98990.3  | 132937   | 28121.61 | 162553.7 | 74310.74 |
| 12808273 | 22575840 | 0        | 0        | 15013    | 373636.5 | 5267260  | 52879893 | 0        | 6517784  |
| 3162276  | 2057280  | 21808.75 | 4232.998 | 72500.64 | 3445497  | 4828353  | 4566099  | 365514.9 | 1989015  |
| 434369.9 | 315576.8 | 0        | 0        | 0        | 10416.9  | 914513.4 | 818959.4 | 34485.25 | 264912.8 |
| 9729140  | 15849339 | 111264.3 | 64481.75 | 378708.3 | 249829.7 | 6655153  | 37753717 | 0        | 4191788  |
| 488791.9 | 343451.4 | 2722.629 | 0        | 5976.854 | 120781.5 | 986346   | 717733.5 | 26107.38 | 238372   |
| 1.61E+08 | 2.63E+08 | 1200187  | 676297.3 | 1581394  | 6941142  | 1.11E+08 | 6.25E+08 | 35477.64 | 58513469 |
| 264891.6 | 87703.42 | 50560.5  | 82541.6  | 73522.56 | 436614.9 | 227949.8 | 242820   | 171309.4 | 407509.3 |
| 1667071  | 1339286  | 193263.8 | 94974.92 | 0        | 223437.3 | 3202591  | 3727380  | 1637959  | 1844820  |
| 9823902  | 15868065 | 19167.16 | 27601.15 | 420234.4 | 262142.3 | 7155330  | 37770486 | 0        | 4619511  |
| 18247988 | 30562766 | 113873   | 0        | 57262.1  | 411180.2 | 11462936 | 72182322 | 0        | 11918239 |
| 70749.54 | 54728.37 | 20898.9  | 4472.571 | 53328.38 | 15502.19 | 98107.41 | 140356.4 | 0        | 36876.78 |
| 40977019 | 56934014 | 313610.5 | 139048.8 | 1391513  | 3773564  | 47703096 | 1.35E+08 | 0        | 12198231 |
| 310090.2 | 272655.1 | 0        | 9498.499 | 0        | 5333.424 | 610796.6 | 458286.7 | 42726.8  | 157098.7 |
| 6588379  | 4066431  | 1299535  | 650631   | 3010895  | 1615390  | 11663330 | 10908167 | 192081.3 | 8621713  |
| 131931.5 | 65991.08 | 188486.3 | 172907.2 | 81394.34 | 209953.6 | 211752.2 | 44993.01 | 107289.7 | 185107.9 |
| 4843667  | 7339305  | 344575.5 | 210284.8 | 2485857  | 459946.1 | 1757255  | 17730397 | 0        | 3298891  |
| 231641.4 | 184257.1 | 12412.09 | 43112.11 | 176452.2 | 69461.53 | 317497.4 | 369984.3 | 48369.08 | 203329.1 |
| 11694198 | 18805682 | 82921.5  | 26481.12 | 59796.15 | 2012053  | 7598209  | 7123869  | 45081422 | 1697812  |
| 256787.3 | 232740.1 | 74823.33 | 55175.56 | 48454.11 | 55246.8  | 382839.4 | 115475.3 | 0        | 360210.6 |
| 13660070 | 19610061 | 19616.32 | 3113.995 | 166268.1 | 394647.9 | 15682272 | 46457415 | 3803.399 | 4070644  |
| 2292166  | 1903594  | 166912.8 | 112740.7 | 417677.2 | 2583491  | 2599860  | 1972945  | 166407   | 857184.5 |
| 58241342 | 89229203 | 644887.8 | 326856.3 | 978985.3 | 2346432  | 53811908 | 2.14E+08 | 0        | 24901435 |
| 11786542 | 19332718 | 297612   | 11091.12 | 1102473  | 598027.5 | 7009471  | 45969656 | 0        | 7743255  |
| 2155284  | 2953925  | 41959.67 | 16578.83 | 396371.4 | 582551.1 | 2011327  | 7364382  | 32390.46 | 911285.8 |
| 11479443 | 16344823 | 2796441  | 1324770  | 7081654  | 38289.01 | 3932213  | 39683180 | 21806.31 | 6235571  |
| 85871673 | 1.05E+08 | 4719775  | 4132270  | 11119167 | 59200856 | 72863974 | 44068610 | 8050446  | 27464273 |
| 21550320 | 32684162 | 297812.3 | 139852.9 | 81047.6  | 506701.6 | 21183354 | 78514899 | 0        | 10082047 |
| 20032350 | 27091530 | 515748.4 | 246595.4 | 2130738  | 684838.5 | 24364058 | 64470352 | 0        | 7319406  |
| 10217027 | 12078330 | 14259.17 | 7373.092 | 0        | 573134.7 | 16286570 | 25779886 | 11691.99 | 3571078  |



|          |          |          |          |          |          |          |          |          |          |
|----------|----------|----------|----------|----------|----------|----------|----------|----------|----------|
| 15474041 | 16868005 | 929628.9 | 72061.65 | 110215.5 | 1178111  | 25942459 | 43984062 | 5666935  | 14781869 |
| 1046787  | 1165354  | 45666.83 | 120927.3 | 181385.4 | 841427.1 | 951773.3 | 253476.2 | 89887.3  | 354756.9 |
| 10542179 | 12496130 | 578363   | 537661.3 | 1490503  | 8275450  | 8868167  | 6973446  | 1154081  | 3611914  |
| 1139408  | 1663260  | 63545.18 | 102744.2 | 97898.57 | 486248.8 | 658387.5 | 246553.1 | 58326.96 | 310377   |
| 188487.7 | 182871.3 | 8668.717 | 14289.8  | 203117.9 | 105132.6 | 117899.3 | 97156.41 | 91189.4  | 503229.4 |
| 1539986  | 2299619  | 478843.4 | 547338.5 | 503574.3 | 202981.7 | 66862.63 | 14682.01 | 5439332  | 1816938  |
| 1729906  | 2393997  | 147209.7 | 12260.62 | 145995.6 | 288144.4 | 1780910  | 5918565  | 11362.72 | 413867.3 |
| 6180013  | 6394228  | 201500.2 | 626598.6 | 6224809  | 104003.9 | 6193614  | 10675668 | 0        | 3618465  |
| 1534359  | 1030513  | 576289.9 | 48534.64 | 231350.2 | 1029215  | 2430027  | 1503496  | 282164.5 | 831219.5 |
| 1.87E+08 | 2.46E+08 | 2219066  | 1022371  | 38571352 | 5660594  | 2.32E+08 | 5.76E+08 | 4406.804 | 33880807 |
| 824533.4 | 1203300  | 97045.66 | 212080.8 | 281459.2 | 102249.2 | 345412.1 | 2976334  | 327771.2 | 273525.4 |
| 305304.1 | 322267.4 | 5849.124 | 9063.607 | 27286.05 | 322081.6 | 282409.8 | 835410.8 | 4014.467 | 98731.42 |
| 1647468  | 1498323  | 20883.89 | 57497.46 | 498511.9 | 1317756  | 2107269  | 3661899  | 393642.8 | 715089.2 |
| 477138.7 | 400567.6 | 164847.7 | 70805.66 | 417424.6 | 2581136  | 2503696  | 1060690  | 132897.4 | 378717.6 |
| 388705.2 | 41064.37 | 960671.2 | 462594.8 | 421537.4 | 401833.6 | 342755.4 | 360463.1 | 376587.2 | 357743.8 |
| 305978.9 | 72624.63 | 509950.7 | 691964   | 144871.6 | 1134333  | 126765.5 | 195808.7 | 321691.2 | 296385.8 |
| 44787772 | 64650658 | 4699460  | 2395245  | 14482244 | 355789.6 | 34962163 | 1.56E+08 | 0        | 17720988 |
| 38579.67 | 7266.409 | 161391.1 | 1638050  | 153328.5 | 11788.61 | 12495.61 | 31499.57 | 36421.06 | 48743.71 |
| 432067.9 | 232748.1 | 651802.2 | 655348.5 | 491858   | 1752887  | 185826.6 | 625353.2 | 479483.6 | 130634.5 |
| 473096.3 | 786084.7 | 0        | 0        | 0        | 0        | 340214.7 | 117303.2 | 12489.01 | 372634   |
| 461636.3 | 532106.9 | 135186.1 | 131470.9 | 65666.3  | 492609.4 | 86736.41 | 41986.91 | 1172467  | 893676.4 |
| 8011565  | 8151084  | 757379.9 | 422423.5 | 1647312  | 1327570  | 12581930 | 21446244 | 62380.07 | 3421243  |
| 14127491 | 21587837 | 28241.58 | 4254.12  | 414998.8 | 330150.5 | 13680848 | 51997606 | 26550.72 | 9834830  |
| 211538.6 | 198693.8 | 121989.6 | 100218.7 | 286069.6 | 803272.1 | 654550.3 | 236534.2 | 30014.69 | 161962.6 |
| 20432062 | 28796960 | 115465.3 | 136982.4 | 652745.8 | 1467495  | 23796397 | 68233523 | 0        | 5107794  |
| 232373.8 | 121456.6 | 38746.31 | 131054.9 | 614936.1 | 414431.9 | 845220.2 | 281204.2 | 16788.49 | 276108.7 |
| 43802109 | 52643053 | 870919.7 | 900492.7 | 6000040  | 9486710  | 59193938 | 1.19E+08 | 3809772  | 79846981 |
| 4170408  | 2624470  | 1757393  | 744316.8 | 2244758  | 23005193 | 24399056 | 8035655  | 697956.3 | 3479751  |
| 138057.5 | 73470.67 | 54382.13 | 32456.37 | 155547.1 | 744915.7 | 517760.9 | 143535.5 | 68481.47 | 63372.8  |
| 1407896  | 281479.3 | 891330   | 1121217  | 1003253  | 1622829  | 1416916  | 1528527  | 1101744  | 1250352  |
| 1478114  | 2238042  | 86841.6  | 154007.8 | 151162.7 | 567107   | 706746.2 | 406640.8 | 102776.1 | 383081.8 |
| 436743.4 | 302872.2 | 59145.78 | 75282.63 | 65928.79 | 636737.6 | 394221.9 | 524870.1 | 31504.15 | 245828.2 |
| 86464.25 | 44996.31 | 87383.73 | 91860.56 | 88058.22 | 659929   | 5179792  | 45271.65 | 160416.1 | 56192.44 |
| 19442.85 | 16379.09 | 2862.018 | 0        | 50212.64 | 93139.47 | 55577.52 | 39292.99 | 5532.417 | 23332.78 |
| 785928.2 | 466605.2 | 953553.6 | 1308399  | 1149988  | 1179297  | 635602.1 | 504551.8 | 810218.7 | 237544.8 |
| 630468.7 | 66802.32 | 474006.9 | 574209.4 | 511302.6 | 711254.9 | 608879.1 | 601369.1 | 641295.4 | 591824.6 |
| 1052608  | 232179.1 | 740101.5 | 778639.7 | 817982.7 | 1258313  | 922864.5 | 1191048  | 704079.2 | 1076668  |
| 14861503 | 13879476 | 87995.44 | 50917.34 | 480989.7 | 14312343 | 19281182 | 37737346 | 1651452  | 9106957  |
| 1501482  | 1472089  | 152571   | 140352.2 | 504945.7 | 1261619  | 1510524  | 4045087  | 392669.3 | 650452.9 |
| 27910455 | 35774522 | 1314884  | 1252544  | 3257083  | 18684675 | 22141888 | 13482322 | 2261990  | 8008785  |
| 5099524  | 6128512  | 139835.7 | 150784.1 | 103827.2 | 1366067  | 7084218  | 15832025 | 766475.4 | 1660695  |
| 403895.6 | 483328.6 | 309822.8 | 565654.8 | 694212.6 | 1458021  | 543969.2 | 455069.2 | 19823.13 | 129834   |
| 16864335 | 23383381 | 97198.92 | 16053.17 | 258432.6 | 1142013  | 20889772 | 55410846 | 0        | 4889930  |
| 1.53E+08 | 2.32E+08 | 16158770 | 9995433  | 39460106 | 27152542 | 79528112 | 5.56E+08 | 1912388  | 56451398 |
| 1.53E+08 | 2.43E+08 | 1223684  | 648335.6 | 2758776  | 6076174  | 1.3E+08  | 5.79E+08 | 0        | 55270888 |
| 828221.6 | 949895.2 | 456905.1 | 1090493  | 1970280  | 14057508 | 1315646  | 811094   | 101614.6 | 124134.7 |
| 234090.1 | 186351.7 | 131319   | 65265.74 | 61582    | 82683.82 | 312603.3 | 528850   | 74490.04 | 79609.6  |

|          |          |          |          |          |          |          |          |          |          |
|----------|----------|----------|----------|----------|----------|----------|----------|----------|----------|
| 256766.6 | 201281.8 | 126635.8 | 262723.5 | 285129.6 | 999388.8 | 580626.1 | 197424.1 | 61897.91 | 154236.2 |
| 121158.5 | 123611   | 36385.29 | 133435.7 | 146710   | 545380.8 | 307904.6 | 67436.73 | 6759.218 | 45632.29 |
| 97895.76 | 105942.2 | 83052.11 | 555228.2 | 271180.7 | 84969.62 | 65017.78 | 19239.87 | 62309.79 | 284352.3 |
| 2980830  | 5205194  | 395125.1 | 398176   | 343662.9 | 364898.1 | 198515.4 | 465779   | 74288.73 | 12258994 |
| 364769.1 | 336766.1 | 2543.174 | 5542.763 | 8264.76  | 2574634  | 7163852  | 949502.5 | 164648.4 | 301776.4 |
| 3961385  | 2452687  | 1445625  | 240338.8 | 732409.4 | 7136173  | 1403973  | 5395208  | 1176516  | 6250314  |
| 410812.1 | 427394.5 | 82372.31 | 121829.8 | 56193.65 | 348285.1 | 331775.7 | 361077.7 | 106068.4 | 157072.1 |
| 1786994  | 1494388  | 2662777  | 1633304  | 6530152  | 803582.5 | 3710608  | 4341584  | 1231895  | 1735178  |
| 1203955  | 2069291  | 0        | 6967.334 | 4533.61  | 197049.2 | 549147.7 | 472486.2 | 9390.115 | 496023.9 |
| 367201.4 | 264637.3 | 65147.87 | 33559.81 | 48782.11 | 711223.9 | 31594.77 | 799924.8 | 181302.6 | 177813.2 |
| 1.39E+08 | 2.04E+08 | 13350364 | 7720117  | 33749983 | 1468212  | 1.16E+08 | 4.87E+08 | 0        | 44888111 |
| 1361329  | 693006.1 | 50141.32 | 164152   | 223364.9 | 388292.9 | 2759443  | 1946875  | 544921.6 | 917745.7 |
| 37847257 | 64754879 | 184691.5 | 67538.45 | 945315.2 | 1192646  | 22010635 | 1.53E+08 | 0        | 13664681 |
| 177084.3 | 51542.79 | 0        | 0        | 5289.922 | 10433.07 | 405554.1 | 178893.3 | 118437.6 | 132660.2 |
| 1300316  | 878308.1 | 81967.41 | 66441.37 | 586390.9 | 808161   | 2098572  | 2386140  | 474076.9 | 864627.7 |
| 103269.6 | 37745.35 | 118386   | 154451.8 | 59323.17 | 546301.4 | 136256.2 | 131864.1 | 86558.34 | 59829.28 |
| 15367867 | 9752625  | 3367288  | 1631208  | 5078691  | 6135291  | 26937228 | 30086696 | 8502552  | 5719627  |
| 466028.1 | 439235.7 | 166176   | 293840.9 | 952202.5 | 1509113  | 1109114  | 209948.7 | 213814.2 | 270932.3 |
| 21402797 | 33347502 | 233422.9 | 127361.5 | 920841.1 | 633413.5 | 19406634 | 79919563 | 0        | 10104598 |
| 143362.5 | 166530.1 | 2164.894 | 0        | 3107.409 | 61455.28 | 197763.1 | 178766.9 | 38521.09 | 61752.15 |
| 544039.1 | 652026.3 | 123073   | 51896.06 | 187402.7 | 75550.26 | 585299.1 | 294523.4 | 226445.5 | 1707424  |
| 170439.9 | 178243.4 | 2695.688 | 9898.31  | 0        | 9744.097 | 301790.5 | 237428.9 | 0        | 65942.24 |
| 1511899  | 2427979  | 70593.04 | 56464.11 | 185859   | 529165   | 561914   | 273988.8 | 209839.9 | 333507.4 |
| 74472866 | 93837237 | 4160382  | 3582031  | 9569772  | 52153372 | 60342582 | 39066144 | 6726736  | 23617825 |
| 127897.7 | 108019.5 | 8457.852 | 0        | 26254.29 | 102496.8 | 184725.1 | 123890.8 | 0        | 53342.49 |
| 36561895 | 62701030 | 4829.635 | 0        | 314462.2 | 462788.2 | 22622297 | 1.48E+08 | 0        | 22226757 |
| 438065.4 | 463018.4 | 62844.44 | 96970.88 | 83721.47 | 221546.8 | 505594   | 851053.7 | 34829.19 | 184309.6 |
| 878306.7 | 1681805  | 3435.146 | 0        | 3999.27  | 125218.4 | 9924.461 | 9489.659 | 107397.6 | 23361.66 |
| 435260.8 | 115085.1 | 219470.1 | 382989.5 | 398603.3 | 441207.3 | 393675.3 | 531353.9 | 346801.9 | 278216.5 |
| 45785903 | 65079744 | 5901216  | 2946913  | 14475188 | 309616   | 38662926 | 1.58E+08 | 0        | 22124275 |
| 664833.6 | 389194.1 | 208068.1 | 245547.9 | 339710.6 | 6866523  | 3020064  | 416332.8 | 107676.1 | 909939.2 |
| 2618261  | 2270622  | 285224.2 | 31219.36 | 666078.7 | 1522309  | 3981862  | 4591209  | 35476.76 | 467235.9 |
| 29966768 | 49503558 | 75001.57 | 15215.77 | 226959.3 | 903941.6 | 22541494 | 1.17E+08 | 50960.97 | 17452946 |
| 3205398  | 2048244  | 1315552  | 2567675  | 8042829  | 5449013  | 7030647  | 2668797  | 582064.8 | 5025745  |
| 7509470  | 6021824  | 2015247  | 812397.9 | 3181467  | 12311228 | 981838.8 | 15247275 | 65633.26 | 5948330  |
| 77006515 | 1.12E+08 | 8048444  | 4077551  | 28179417 | 704379.6 | 57776913 | 2.71E+08 | 0        | 31624469 |
| 244471.2 | 177971.9 | 42127.35 | 23761.1  | 73723.99 | 203270.9 | 348211.7 | 402765.5 | 36551.94 | 110483.8 |
| 8258700  | 10519748 | 10196.15 | 0        | 67737.67 | 501565.5 | 12215805 | 23449224 | 55493.64 | 1975940  |
| 582124.5 | 471299.4 | 27168.21 | 32159.09 | 129618.5 | 697364.2 | 649363.7 | 623629.1 | 48931.85 | 174080.3 |
| 903017.1 | 625026.7 | 215707.7 | 381591.6 | 691862.9 | 4027380  | 5127099  | 1415519  | 59825.89 | 462815.1 |
| 22339681 | 35516299 | 119499.5 | 64084.51 | 1018888  | 308548.4 | 19440991 | 84824028 | 0        | 10233173 |
| 683021.4 | 1288365  | 10373.05 | 6081.422 | 0        | 85762.39 | 66513.27 | 30761.64 | 75792.31 | 27217.43 |
| 23042199 | 17799605 | 10351151 | 2409565  | 21079966 | 6803848  | 25779837 | 44241936 | 210216.9 | 18055227 |
| 17408038 | 18193677 | 812836.2 | 786600.7 | 9344860  | 449422.9 | 25191679 | 43786545 | 0        | 7396711  |
| 17475722 | 24304414 | 342586.7 | 153936.6 | 957198.2 | 2552809  | 20174227 | 58178662 | 9956.534 | 3723523  |
| 201219.5 | 99533.72 | 330100.5 | 357458   | 40231.67 | 467923.4 | 257545.7 | 186742.4 | 224096.8 | 41816.3  |
| 5560345  | 6510293  | 0        | 3362.201 | 13276.69 | 859307.7 | 8836848  | 14470000 | 35861.08 | 944304.9 |

|          |          |          |          |          |          |          |          |          |          |
|----------|----------|----------|----------|----------|----------|----------|----------|----------|----------|
| 947623.4 | 750981.6 | 1743565  | 2323585  | 2587826  | 695452.8 | 327683   | 296567.7 | 1829474  | 1698101  |
| 4460756  | 8184919  | 173856.8 | 96959.82 | 60663.94 | 755706.1 | 629364.4 | 263507.9 | 341183.1 | 253877.2 |
| 393856.6 | 257765   | 12540.06 | 816892   | 3330823  | 201778.7 | 975658.8 | 156225.7 | 700355.5 | 635605.5 |
| 63396556 | 82901701 | 454240.8 | 515029.3 | 18153575 | 2143926  | 78242543 | 1.92E+08 | 0        | 16500397 |
| 248775.9 | 193476.7 | 22716.75 | 2594.17  | 73966.01 | 332583.2 | 240861.2 | 470599   | 21933.02 | 71684.15 |
| 4.6E+08  | 3.41E+08 | 83785370 | 27811734 | 1.92E+08 | 1.73E+08 | 7.62E+08 | 9.09E+08 | 84466438 | 1.67E+08 |
| 1069739  | 2016453  | 43788.31 | 29034.12 | 17324.24 | 120508.2 | 72293.85 | 16572.83 | 131423.7 | 47071.65 |
| 403843.2 | 379804.9 | 0        | 7965.23  | 0        | 270197.9 | 630688   | 933446.9 | 9219.346 | 65028.15 |
| 2070840  | 1743257  | 52254.99 | 90445.02 | 112181.8 | 2250982  | 2692439  | 2865474  | 177370.3 | 1299186  |
| 198387.3 | 144430.2 | 9596.744 | 2127.812 | 47921.36 | 249089   | 236433.4 | 383863.9 | 32687.77 | 86693.5  |
| 1422811  | 796003.7 | 72378.09 | 95074.04 | 219990.4 | 1880014  | 1900086  | 1677138  | 365779.1 | 974761.2 |
| 983484.6 | 1418854  | 96321.97 | 163431.7 | 203220.7 | 403325.6 | 478622.4 | 377891.4 | 151786.8 | 285511.4 |
| 361161.3 | 229830.8 | 14909.69 | 37404.92 | 57261.2  | 89124.91 | 716825.7 | 300169.4 | 188072.4 | 197264.6 |
| 424761.4 | 448831.2 | 46868.09 | 30201.86 | 102584.5 | 330064.3 | 437127.1 | 109833.5 | 81862.16 | 101508.6 |
| 3241263  | 2284053  | 2256948  | 1507123  | 4355527  | 14236790 | 7528269  | 6382388  | 629198.6 | 1438834  |
| 172181.1 | 114811.1 | 2507.755 | 0        | 43558.9  | 318462.6 | 84504.31 | 265301.8 | 0        | 119338.8 |
| 320009.1 | 348672.8 | 63629.02 | 69346.52 | 120195.2 | 157619   | 298022.1 | 903026.8 | 53083.96 | 76232.45 |
| 295401   | 164135.9 | 77202.12 | 111421   | 128702.4 | 427618.4 | 222775.7 | 249925   | 219740.4 | 98788.73 |
| 728772.7 | 498297.9 | 49745.22 | 63148.96 | 45572.85 | 442762.9 | 1308953  | 979761   | 67140.34 | 443050.2 |
| 494276.2 | 437661.3 | 513614.6 | 527542.9 | 3077453  | 132996.3 | 1282122  | 889474.7 | 57451.88 | 1031607  |
| 4616721  | 3513992  | 1934549  | 7726530  | 45989499 | 5866604  | 7481258  | 9794057  | 50683.76 | 3395208  |
| 17431760 | 27642106 | 24613.14 | 0        | 418378.7 | 274934   | 15999904 | 66144175 | 23520.27 | 9420027  |
| 283324.7 | 358158.3 | 0        | 0        | 0        | 115630.6 | 357019.6 | 878824   | 0        | 11973.59 |
| 875790.3 | 1284471  | 90952.77 | 102090.9 | 46809.26 | 708342.5 | 175245.1 | 146262.8 | 621656.2 | 3142046  |
| 426654.4 | 676948.8 | 6116.898 | 3235.496 | 19532.78 | 216448.2 | 181385.6 | 58333.05 | 68991.31 | 145530.6 |
| 586410.7 | 757903.9 | 3218.653 | 15754.63 | 57662.73 | 275769.8 | 620967.7 | 253801   | 16109.02 | 176229.4 |
| 7021851  | 7497651  | 353386.9 | 145146.8 | 942243.9 | 3097686  | 10088638 | 19147332 | 49713.74 | 4274393  |
| 17821597 | 28293703 | 14152.48 | 60152.79 | 2584173  | 644006.2 | 14155569 | 67608534 | 0        | 13100799 |
| 1545883  | 978182.8 | 113881.5 | 84767    | 701080.4 | 1512970  | 2180668  | 2047250  | 36145.89 | 1451892  |
| 8170332  | 4208424  | 635239.3 | 1182857  | 2080953  | 4506139  | 15131729 | 10374478 | 2733389  | 5585988  |
| 9740406  | 16745517 | 122242.4 | 10893.24 | 0        | 355829   | 6055547  | 39432675 | 6086.614 | 3952403  |
| 7623597  | 11267238 | 852639.4 | 891978   | 1360136  | 2958251  | 3767232  | 2281068  | 1073831  | 2069156  |
| 354076.2 | 264977.9 | 4263.113 | 34217.25 | 26757.44 | 79032.82 | 695304.5 | 227257   | 104029   | 254799.5 |
| 11037948 | 8417892  | 791030.9 | 681444.2 | 3080435  | 15611136 | 9954812  | 14970617 | 1217249  | 4346569  |
| 31091436 | 46134285 | 2279395  | 1883918  | 11974389 | 432142.3 | 22358328 | 1.12E+08 | 75565.39 | 14070419 |
| 776995.4 | 302752   | 67042.7  | 33424.02 | 123222.3 | 1132062  | 1026734  | 745399.4 | 434043.6 | 627218.1 |
| 697955.3 | 468125.1 | 73499.04 | 35736.05 | 111316   | 865487.8 | 895688.1 | 1064556  | 81228.92 | 320915.5 |
| 308999.9 | 71174.96 | 528440.7 | 730115.2 | 596993.1 | 216354.2 | 127871.4 | 385252.7 | 275216.8 | 204943.4 |
| 13344198 | 2911013  | 9076983  | 14707653 | 12750765 | 8790431  | 12349705 | 17641023 | 10080415 | 11512411 |
| 1086406  | 1320975  | 193418   | 191519.1 | 387478.2 | 405479.2 | 911751.2 | 348451.7 | 417566   | 384999.7 |
| 697417.2 | 552965.4 | 183597.6 | 209208.6 | 517754.1 | 925541.4 | 115744.2 | 1024342  | 125391.4 | 260664   |
| 1753584  | 1586217  | 387269.8 | 197120.3 | 527701.8 | 528048.7 | 2668616  | 3790086  | 25914.94 | 260460.9 |
| 928591.9 | 558507.7 | 114460.8 | 25695.09 | 212398.7 | 1161481  | 1223718  | 1282897  | 166144.2 | 496003.2 |
| 4056720  | 683765.4 | 2708718  | 3756009  | 3677437  | 4454012  | 3521816  | 4182412  | 3171023  | 3545652  |
| 291180.1 | 383420.1 | 3168.03  | 0        | 6894.213 | 86472.78 | 359479.5 | 935888.7 | 42620.99 | 125546.4 |
| 8686003  | 14654003 | 7958.305 | 24132.67 | 201455.8 | 278171.9 | 6027395  | 34652132 | 0        | 4486615  |
| 176649.1 | 138482.1 | 75073.69 | 69633.68 | 300625.8 | 1419576  | 12167714 | 155455.3 | 24231.22 | 83448.3  |

|          |          |          |          |          |          |          |          |          |          |
|----------|----------|----------|----------|----------|----------|----------|----------|----------|----------|
| 344335.4 | 304211.3 | 2715.867 | 2202.99  | 5924.045 | 354522.7 | 465728.9 | 422547.5 | 21212.64 | 31413.52 |
| 908756.3 | 572036.9 | 495981.3 | 703791.6 | 596075   | 1024103  | 175248   | 1071389  | 221040.2 | 393126   |
| 56137149 | 71749793 | 3143662  | 2587705  | 7156389  | 38572424 | 46220747 | 28687551 | 5037176  | 18026907 |
| 24933902 | 41877214 | 4259.511 | 4173.009 | 0        | 1047014  | 18203597 | 99000243 | 0        | 12568752 |
| 4868169  | 8756059  | 101031   | 10691.35 | 64726.7  | 40343.79 | 2221551  | 20441398 | 0        | 1957822  |
| 23225482 | 46395188 | 15600.3  | 11993.18 | 394870.5 | 0        | 16158.16 | 421311.4 | 9385732  | 167086.9 |
| 1255304  | 1781023  | 56228.86 | 32080.79 | 90745.61 | 632076.1 | 966423.9 | 419370.2 | 108066.1 | 356797.7 |
| 706403.9 | 922173.2 | 307851.5 | 373717.9 | 280573.3 | 239910.5 | 21201.15 | 23198.75 | 2093058  | 1218794  |
| 498239.2 | 269963.3 | 16260.01 | 88680.46 | 3024960  | 259525.6 | 3259050  | 880510.8 | 569244.2 | 161317.8 |
| 33409427 | 47043430 | 34447.13 | 37636.48 | 308716.1 | 113222.4 | 43893162 | 1.12E+08 | 0        | 10423716 |
| 208234.9 | 186683.7 | 3569.447 | 0        | 10281.96 | 265751   | 224341   | 406755.8 | 17405.35 | 166452.3 |
| 23480955 | 37946843 | 16043.4  | 5800.432 | 9466.986 | 887325.2 | 20656735 | 90277849 | 0        | 12076066 |
| 6882005  | 12142407 | 9389.46  | 3768.046 | 239424.6 | 242163.8 | 3574423  | 28432290 | 41985.9  | 3865810  |
| 595857.1 | 1332377  | 0        | 0        | 2216781  | 1885580  | 3694480  | 0        | 0        | 0        |
| 172874.2 | 102592.9 | 28861.96 | 11821.96 | 64258.85 | 161497.3 | 258685.3 | 197562.8 | 45237.14 | 97071.27 |
| 65265.99 | 74703.36 | 48576.34 | 407970.2 | 191479.2 | 64125.5  | 31712.2  | 5582.842 | 38758.04 | 195624.7 |
| 556779.6 | 310022.1 | 122721.3 | 49398.12 | 320342.5 | 204925.5 | 965511.5 | 699376.9 | 105826.5 | 366373.5 |
| 3846354  | 3955537  | 2050986  | 4269807  | 8654778  | 56164235 | 5529683  | 3476462  | 476860.3 | 1281933  |
| 618815.8 | 244621.8 | 13118.2  | 16792.81 | 4053.585 | 17999.03 | 1417591  | 1031552  | 438203.5 | 432759.8 |
| 154466.5 | 105983.7 | 139818.5 | 117383.2 | 81923.47 | 677107   | 423083   | 179139.5 | 43709.29 | 49673.86 |
| 592586.7 | 383702.6 | 0        | 0        | 9883.242 | 701616.6 | 892297.1 | 824468.8 | 43819.76 | 344623.9 |
| 112657.1 | 62224.38 | 118909.6 | 65528.03 | 188906.3 | 715243.7 | 143890.3 | 72548.23 | 66427.92 | 91495.76 |
| 102389.6 | 44491.8  | 58532.17 | 105241.1 | 105840.8 | 4759543  | 565154.5 | 93363.84 | 70872.4  | 62591.14 |
| 318083.6 | 368580.2 | 36684.25 | 10578.44 | 137438.3 | 266262   | 203747.5 | 651418.9 | 68444.16 | 31627.43 |
| 68152.4  | 92990.87 | 0        | 13153.91 | 64481.37 | 802587.1 | 321347.2 | 97911.83 | 0        | 8157.294 |
| 313465.4 | 498302.6 | 6217.373 | 0        | 45592.69 | 111431.2 | 160918   | 98219.3  | 19674.65 | 88244.48 |
| 5741531  | 10326490 | 17257.29 | 3467.062 | 0        | 108586.3 | 2845905  | 24112003 | 0        | 2796191  |
| 259922.4 | 53636.71 | 214848   | 271428.6 | 224556   | 402072.9 | 611913   | 223429   | 187018.7 | 280700.3 |
| 351681.6 | 327552.2 | 35331.4  | 16427.36 | 96815.01 | 491357.7 | 219318   | 686225.9 | 5825.968 | 6616.091 |
| 22217964 | 29253678 | 1080172  | 964943.4 | 2536809  | 14825116 | 17656825 | 10342685 | 1728231  | 6515445  |
| 12178646 | 19585527 | 726514.6 | 666267.3 | 5807211  | 0        | 4883104  | 46560284 | 0        | 9124736  |
| 8863209  | 15248742 | 22155.41 | 0        | 0        | 181176.2 | 6010183  | 35894347 | 0        | 4490796  |
| 356773.3 | 197838.8 | 25325.07 | 41611.98 | 95825.2  | 370307.7 | 544244.1 | 423557.3 | 57111.79 | 322935.8 |
| 25700499 | 46914159 | 0        | 0        | 61253.44 | 106063.6 | 11656413 | 1.09E+08 | 0        | 12964506 |
| 194236.3 | 82783.89 | 122557.3 | 154488.9 | 371774.9 | 1127896  | 237460.4 | 215108.8 | 207303.2 | 73997.98 |
| 3826469  | 2117453  | 1006263  | 451756.3 | 1724533  | 2366959  | 6301515  | 5123094  | 823093   | 2440646  |
| 674636.5 | 985653.4 | 90568.39 | 92081.81 | 150204.5 | 289865.2 | 301382.9 | 230329.4 | 49819.34 | 160516.9 |
| 161284.5 | 102619.5 | 12319.73 | 7537.047 | 225593.1 | 120808.7 | 122159.1 | 74351.84 | 100519   | 327323   |
| 280550.2 | 275524.4 | 37361.77 | 62283.26 | 121179.4 | 32759.78 | 402346.4 | 661887.9 | 58401.34 | 96858.67 |
| 4550423  | 6444538  | 129338.4 | 51349.7  | 392024.5 | 2691850  | 3290456  | 1809583  | 280198.1 | 1167720  |
| 36723303 | 59574488 | 185065.1 | 95676.83 | 983633.6 | 1561390  | 31280987 | 1.42E+08 | 0        | 12817736 |
| 657196.9 | 861052.9 | 26432.62 | 34209.84 | 12206.08 | 220870   | 778852.7 | 8445.572 | 2000364  | 1045971  |
| 5089730  | 6470242  | 7674.06  | 4957.359 | 75429.23 | 1302052  | 7048200  | 7969852  | 66503.86 | 1089436  |
| 10740063 | 13490968 | 359590.3 | 384854.3 | 4776930  | 381902.3 | 12927664 | 31698038 | 0        | 3313852  |
| 68741615 | 99180554 | 99764.08 | 77080.96 | 1471259  | 4813626  | 83023290 | 2.34E+08 | 10249.78 | 17451547 |
| 790046.6 | 501690.2 | 10660.68 | 10128.59 | 167598.6 | 950252.2 | 1109679  | 1093412  | 70941.58 | 509411.5 |
| 2473374  | 556868.7 | 64400.51 | 142178.3 | 594743.8 | 1393181  | 4993578  | 3294666  | 1867517  | 2071530  |

|          |          |          |          |          |          |          |          |          |          |
|----------|----------|----------|----------|----------|----------|----------|----------|----------|----------|
| 1018454  | 598035.7 | 124421.6 | 10376.05 | 270874.8 | 1220742  | 1409945  | 1339742  | 185610.9 | 587269.7 |
| 2084059  | 1151161  | 398892.5 | 565368   | 581153.3 | 2657613  | 2484724  | 2052181  | 617279.8 | 1350769  |
| 2355833  | 2648118  | 112587.1 | 90153.04 | 325483.7 | 2042114  | 2346297  | 1719953  | 243442   | 838048.9 |
| 235938.4 | 183115.5 | 57579.95 | 44854.14 | 57027.85 | 351861.5 | 145609.8 | 331965.7 | 33714.67 | 103635.5 |
| 36305815 | 46165516 | 2025091  | 1792558  | 4676503  | 26002014 | 30299662 | 18908080 | 3212724  | 11762786 |
| 519580.6 | 330642.5 | 2435345  | 96081.66 | 21736221 | 740703.6 | 632631   | 457863   | 49618.94 | 430642.1 |
| 298221.2 | 299334.7 | 0        | 6957.174 | 25618.08 | 171274.7 | 454051.3 | 367150.3 | 33600.14 | 78114.93 |
| 422107.6 | 298637.7 | 2643.017 | 9875.208 | 85443.93 | 310897   | 718603.5 | 683949.7 | 116552.6 | 457207.2 |
| 8887984  | 5376685  | 1055943  | 849343.8 | 2164407  | 11262270 | 11362453 | 13949254 | 1591685  | 5159705  |
| 29777584 | 36995124 | 968135.6 | 862108.3 | 12514592 | 824205.9 | 37668921 | 84807941 | 0        | 9297382  |
| 219624.4 | 181375.1 | 42950.06 | 59197.84 | 396810   | 1641880  | 14971334 | 136527   | 63962.46 | 73924.85 |
| 3102298  | 3308671  | 1369488  | 589827.3 | 1712530  | 1901660  | 1725612  | 8597126  | 37303.26 | 3511544  |
| 11965101 | 19128255 | 192082.9 | 109396.5 | 733025   | 676721.1 | 10306428 | 45752635 | 0        | 5126339  |
| 883621.6 | 874384.3 | 42574.25 | 18309.45 | 86932.07 | 236068   | 1516559  | 2153158  | 125287.3 | 445890.5 |
| 100427.2 | 79926.88 | 18386.64 | 4076.683 | 39850.12 | 122096.6 | 96396.53 | 129031.9 | 14963.75 | 45779.61 |
| 1598874  | 1309060  | 130556.4 | 8992.458 | 42006.32 | 827008.8 | 2862050  | 3279994  | 271792.5 | 537195.3 |
| 1211265  | 1640639  | 162727.9 | 219474.7 | 262100.8 | 607649.7 | 736002.6 | 493514.8 | 144197.6 | 397276.6 |
| 221663.5 | 124423.6 | 241379.5 | 336512.6 | 58905.54 | 537724   | 458954.7 | 222892.8 | 295323.6 | 142222.6 |
| 4.15E+09 | 4.79E+09 | 8.8E+08  | 4.79E+08 | 1.84E+09 | 5.89E+08 | 4.72E+09 | 1.1E+10  | 1.06E+08 | 2.52E+09 |
| 764301.6 | 456740.6 | 0        | 5770.139 | 33629.21 | 46742.36 | 1689731  | 1370565  | 142382.9 | 701012.5 |
| 45827.18 | 51473.69 | 96921.97 | 62266.98 | 156487.7 | 2786980  | 88161.47 | 121588.5 | 0        | 16451.23 |
| 116172.9 | 35774.95 | 22264.53 | 92392.5  | 77187.73 | 153109.8 | 99197.67 | 102456.6 | 81047.26 | 115873.6 |
| 98221.35 | 71757.13 | 34457.05 | 41735.74 | 275382.6 | 156700.2 | 363414   | 158358.4 | 0        | 92140.74 |
| 1208178  | 820017.4 | 729422.5 | 4412347  | 2427506  | 1520466  | 954633.2 | 567840   | 765504.7 | 2629120  |
| 11059827 | 11682472 | 3733548  | 1145325  | 9145038  | 9141523  | 2620012  | 28755862 | 11045.6  | 10549169 |
| 32887559 | 15736349 | 3077898  | 4995336  | 8931621  | 19434276 | 61059858 | 43062698 | 11719103 | 23828310 |
| 124171.5 | 157809.8 | 0        | 0        | 0        | 51014.34 | 160646.5 | 400252   | 7181.589 | 67581.03 |
| 97212.36 | 48949.71 | 13740.8  | 15985.84 | 120665.7 | 438161.6 | 436362.5 | 122161.1 | 22392.19 | 90362.17 |
| 117347.7 | 107232.7 | 3396.33  | 3358.969 | 15460.33 | 7038.387 | 224192   | 213152   | 31655.7  | 86598.68 |
| 1132331  | 1447312  | 111328.4 | 52439.04 | 81817.27 | 216844.5 | 1469959  | 3520575  | 37431.59 | 345259.4 |
| 4973323  | 7305485  | 0        | 2432.47  | 153593.2 | 698653.1 | 5558370  | 17689247 | 0        | 2898306  |
| 355938.4 | 191854.3 | 909892.3 | 8146479  | 881815.4 | 114126.8 | 164738.4 | 361147.8 | 382673.7 | 656921.7 |
| 226831.7 | 207989.7 | 0        | 0        | 5754.481 | 96432.73 | 405740.7 | 218543.2 | 59199.35 | 294220.7 |
| 1.12E+08 | 1.38E+08 | 3859394  | 1634573  | 12526564 | 1.4E+08  | 44888009 | 3.47E+08 | 170635.8 | 39180015 |
| 8002562  | 5559350  | 552636.1 | 706834.7 | 1491454  | 5788468  | 13481098 | 9865529  | 1556806  | 4398272  |
| 5648452  | 9274269  | 0        | 0        | 0        | 384565.4 | 4798114  | 22019206 | 128889.2 | 2780785  |
| 131591.2 | 47284.18 | 59227.63 | 29612.97 | 113014   | 49438.2  | 207394.3 | 71457.19 | 198062.1 | 140700.5 |
| 648114.8 | 479310.5 | 100798.1 | 124757.4 | 290773   | 673775.7 | 733801.1 | 1399147  | 135195.3 | 348469.2 |
| 2018254  | 3057809  | 116851.9 | 306551.3 | 184079.8 | 1590482  | 316412.7 | 609483.4 | 1211933  | 446488.2 |
| 1043672  | 2039889  | 2886.701 | 6066.885 | 0        | 133841.7 | 69409.3  | 9307.46  | 117997.6 | 33368.35 |
| 211565   | 119759.7 | 203700.5 | 199367.8 | 55225.03 | 715362.9 | 640052.6 | 125816.6 | 128165.7 | 135079.7 |
| 3539131  | 4153925  | 174133   | 92192.93 | 367245.5 | 2951092  | 3485412  | 1907368  | 282425.7 | 1106460  |
| 425425.3 | 285570   | 0        | 3220.07  | 35390.03 | 192080.4 | 840534   | 717652.8 | 48999.16 | 249352.6 |
| 224601.6 | 149253.1 | 16490.4  | 78399.4  | 25523.98 | 0        | 448008   | 265278.4 | 200643.7 | 98901.35 |
| 11341626 | 17509728 | 111205.7 | 65230.74 | 382315.5 | 363596.2 | 11938065 | 42176568 | 0        | 6802120  |
| 7351025  | 7733966  | 0        | 0        | 47900.4  | 702220.7 | 13514837 | 17418685 | 0        | 4639733  |
| 4982764  | 6935932  | 125706.7 | 9669.559 | 268060.4 | 130495.5 | 6596525  | 16378232 | 0        | 1689364  |

|          |          |          |          |          |          |          |          |          |          |
|----------|----------|----------|----------|----------|----------|----------|----------|----------|----------|
| 1.3E+08  | 81195035 | 22801171 | 13249059 | 64471550 | 37911615 | 2.33E+08 | 2.23E+08 | 2769985  | 1.4E+08  |
| 12404005 | 18385339 | 1006907  | 527816.4 | 4150732  | 256796.4 | 10486965 | 43989993 | 0        | 4047269  |
| 2226947  | 1802174  | 218880.2 | 261683.6 | 1063623  | 570876.3 | 3696135  | 4934703  | 92424.36 | 1868289  |
| 1802412  | 2279359  | 134079.9 | 150574.3 | 233786.7 | 1270581  | 1521853  | 1122192  | 166205.8 | 568659.1 |
| 173341.4 | 114929.4 | 5687.956 | 6722.417 | 9125.983 | 148604.3 | 298782.4 | 318431   | 215643.5 | 193254.9 |
| 690940.5 | 478788   | 380309.6 | 214130.8 | 999317.9 | 4601536  | 1710973  | 760662.9 | 212994.4 | 393364.6 |
| 360785.7 | 549221.4 | 40640.75 | 33530.35 | 51401.9  | 196306.5 | 133827.1 | 96373.91 | 42940.02 | 94014.06 |
| 4746106  | 5581590  | 158079.5 | 89286.78 | 801487   | 1459302  | 6636601  | 13986696 | 940301   | 2531519  |
| 417239.6 | 278017.2 | 13181.1  | 0        | 0        | 25925.24 | 914342.7 | 774184.4 | 241548.3 | 520667.8 |
| 12873331 | 19711977 | 0        | 0        | 0        | 201826.9 | 14638313 | 46848951 | 11220.96 | 4007889  |
| 8173174  | 1572520  | 5992658  | 7982348  | 9127227  | 5067920  | 7539361  | 10198537 | 6723246  | 6489553  |
| 127798.6 | 78518.42 | 29069.85 | 24981.96 | 30454.53 | 28427.9  | 242190.9 | 198578.7 | 36251.74 | 49603.75 |
| 15303911 | 20627893 | 718464.8 | 614022.1 | 1690094  | 10145450 | 12052315 | 7189603  | 1089266  | 4289025  |
| 8153359  | 6670886  | 927034.4 | 1240261  | 2546177  | 3335293  | 13352597 | 17508682 | 17125.51 | 5805687  |
| 3082990  | 3423099  | 454513.7 | 920372.5 | 3073428  | 741220.9 | 1669416  | 4458769  | 8513104  | 765778.4 |
| 817188.8 | 678909.6 | 173631   | 219424.5 | 265109   | 784957.1 | 870390.6 | 598439.7 | 234316.4 | 513709.4 |
| 1456111  | 1292329  | 57336.8  | 5999.22  | 48892.81 | 391935.6 | 2762384  | 3476710  | 281387.6 | 378576.6 |
| 1819544  | 437449.7 | 1273007  | 1650290  | 1997847  | 1160412  | 1740015  | 2476135  | 1472817  | 1455346  |
| 986818.8 | 158793.4 | 834466.9 | 866030.5 | 931949   | 978527.4 | 922744.2 | 910284.9 | 805092.6 | 966049.2 |
| 5640021  | 7124929  | 281240.5 | 200110.6 | 731761.7 | 4204904  | 4937323  | 2796348  | 484205.4 | 1636533  |
| 24408090 | 39258424 | 192182.4 | 109899.3 | 735542   | 657452.7 | 23069055 | 93622773 | 0        | 10923198 |
| 292947.4 | 91062.92 | 6108.564 | 3513.924 | 23049.95 | 7620.685 | 678469   | 440086.4 | 235077.5 | 217657   |
| 367552.6 | 306653.3 | 13363.26 | 19841.59 | 51024    | 371201.9 | 503714.3 | 818595.1 | 406953.8 | 50914.53 |
| 1538329  | 1003061  | 887175.2 | 4620963  | 8571363  | 791986.2 | 1248993  | 1158249  | 1007804  | 2093570  |
| 22310516 | 26546551 | 4330595  | 351748.9 | 6324290  | 8122963  | 25473911 | 67197888 | 402214.7 | 6305324  |
| 5466404  | 5841324  | 4899583  | 3065418  | 877009.1 | 1442502  | 2566895  | 15689981 | 4753158  | 1623714  |
| 109111.4 | 82083.97 | 73874.98 | 76227.67 | 45451.2  | 756455.4 | 346044.4 | 129273.8 | 15127.05 | 78117.39 |
| 217028.1 | 130366.1 | 57458.89 | 32714.03 | 125036.8 | 1227873  | 1152925  | 344118.7 | 31389.65 | 148554.8 |
| 1206960  | 685916.8 | 874345.5 | 962416.7 | 764133.6 | 874743.3 | 886754.9 | 1595143  | 1937578  | 1483859  |
| 161515.8 | 210619.2 | 14644.24 | 23654.39 | 9767.849 | 79521.39 | 156427.3 | 535863.8 | 34151.07 | 60119.26 |
| 1893435  | 1460141  | 258129.6 | 334131.3 | 201808.9 | 1256181  | 3071349  | 2342244  | 200686.9 | 913252   |
| 14357881 | 8583712  | 1833090  | 1421168  | 3454091  | 18183347 | 18715989 | 22931561 | 2714671  | 8630114  |
| 6534432  | 4837863  | 509896.5 | 377154.7 | 4983671  | 419490.8 | 11059673 | 9322117  | 1214990  | 1443873  |
| 4961050  | 3103137  | 717992.9 | 683127.5 | 1395937  | 5902092  | 6446497  | 4320459  | 987295.3 | 3321877  |
| 1439406  | 675408.4 | 137786.5 | 26110.06 | 164443.1 | 2433879  | 1514048  | 1701058  | 626468.7 | 809748.6 |
| 24137480 | 29918246 | 1326350  | 1312877  | 3266095  | 18537806 | 21452070 | 13047136 | 2327686  | 8206866  |
| 197099   | 175362   | 237156.8 | 20786.24 | 474553.3 | 3063776  | 280600.2 | 348788.5 | 91070.72 | 35587.51 |
| 13449065 | 14089563 | 857724.3 | 817063.2 | 2237774  | 12608834 | 14300925 | 10583444 | 1734330  | 5377310  |
| 138384.8 | 112681.8 | 74966.34 | 476681.6 | 393255   | 147850.3 | 96987.23 | 78295.91 | 88850.51 | 335405.6 |
| 97184919 | 1.76E+08 | 177645.5 | 45366.06 | 1011718  | 1366225  | 54766277 | 4.1E+08  | 4802.603 | 44088456 |
| 808557.2 | 1145799  | 37255.26 | 30916.04 | 128250.6 | 278177   | 740470.3 | 357614.5 | 35099.89 | 124055.3 |
| 1.58E+08 | 1.24E+08 | 34710498 | 20203308 | 80335489 | 11482257 | 2.69E+08 | 3.39E+08 | 33417896 | 64142699 |
| 199441.4 | 122081.9 | 0        | 0        | 0        | 0        | 452407.3 | 232634.8 | 0        | 203566.8 |
| 1608794  | 1887935  | 435689.7 | 425833.5 | 1170464  | 132207.8 | 1221713  | 1851896  | 218626.1 | 4734547  |
| 1237089  | 729207.1 | 497910.6 | 220120.9 | 355861.5 | 835943.6 | 1968956  | 1951303  | 436767.8 | 522587.3 |
| 1176109  | 706046.3 | 183869.9 | 38474.4  | 366491.2 | 1343453  | 1644435  | 1739539  | 292422.5 | 554188.3 |
| 818910   | 165545.8 | 468747.7 | 987837.5 | 401146.2 | 866759.2 | 680442.7 | 840568   | 595664.7 | 802498.1 |

|          |          |          |          |          |          |          |          |          |          |
|----------|----------|----------|----------|----------|----------|----------|----------|----------|----------|
| 4022273  | 3302458  | 640587.6 | 239872.8 | 1082095  | 1275475  | 7016993  | 8779757  | 752533.8 | 1406993  |
| 229576.2 | 41873.78 | 257141.6 | 63344.7  | 46798.5  | 322978.3 | 157173.9 | 244532.7 | 226638.8 | 178511.1 |
| 753652.3 | 204956.6 | 371241   | 422057   | 506588.5 | 926343.7 | 811841.7 | 566160.9 | 642261   | 714869.5 |
| 669519.6 | 485402.9 | 113681.5 | 338414.6 | 331073   | 4094741  | 3024259  | 697525.8 | 99422.38 | 567740.5 |
| 7187520  | 9687330  | 37777.48 | 40551.86 | 366577.2 | 439759.9 | 10192477 | 22720968 | 9152.375 | 2049290  |
| 442938.8 | 330088.3 | 0        | 0        | 0        | 0        | 971330.2 | 959831.4 | 37540.56 | 409266.6 |
| 77181949 | 97191939 | 602016.2 | 736714   | 31246891 | 1923477  | 1.03E+08 | 2.2E+08  | 0        | 15566681 |
| 1498052  | 1013385  | 2235413  | 1719855  | 2878420  | 446246.2 | 4009253  | 3166766  | 1192635  | 975766.1 |
| 1864844  | 492384.9 | 1475399  | 1635316  | 1725727  | 1202983  | 1972873  | 2683845  | 1520890  | 1500948  |
| 75340018 | 1.09E+08 | 138596.5 | 159993.8 | 1674192  | 8099735  | 93747884 | 2.57E+08 | 8731.169 | 18107221 |
| 560839   | 347551.3 | 21531.48 | 20524.97 | 78364.27 | 310583.7 | 1079189  | 479593.2 | 397211.6 | 513412   |
| 36901978 | 47278394 | 1055933  | 695639.6 | 9782520  | 2036694  | 50198785 | 1.09E+08 | 0        | 8353105  |
| 1009846  | 602483.9 | 59083.64 | 55960.41 | 33473.63 | 1072522  | 1649168  | 1770999  | 678321.4 | 883495.6 |
| 3278959  | 6755978  | 10522.85 | 20486.98 | 6144.833 | 15930.55 | 22498.62 | 112853.2 | 15362983 | 205713.7 |
| 70820.64 | 109733.6 | 23978.69 | 9499.406 | 225137.5 | 1355153  | 128121.1 | 38047.02 | 10366.71 | 15043.46 |
| 590619.7 | 571467.6 | 6054.819 | 5324.388 | 153203.3 | 3319801  | 12025177 | 1089890  | 80158.64 | 371448.6 |
| 377800   | 238114   | 0        | 0        | 0        | 149808.4 | 788571.7 | 491218.3 | 35101.26 | 274851.1 |
| 305650.6 | 143972   | 378911.6 | 389413.5 | 68389.96 | 1026352  | 550702.2 | 268638.1 | 230188.3 | 125831   |
| 1050531  | 596826.6 | 243614.3 | 111704.9 | 255766.9 | 2058076  | 266247.2 | 1979504  | 510413.6 | 690642.5 |
| 5206905  | 6474163  | 623919.8 | 141902.6 | 183861.7 | 756283.6 | 7593995  | 15408788 | 18282.34 | 2274780  |
| 2099033  | 2213048  | 306245   | 179801.9 | 513897.5 | 2969478  | 768747   | 4848645  | 44213.58 | 97550.73 |
| 8052336  | 10071227 | 408080.5 | 328888.7 | 996070.2 | 6092397  | 7414039  | 4257335  | 652512.6 | 2501883  |
| 2830463  | 1579250  | 365106.4 | 101757.7 | 708529.5 | 3474942  | 3992849  | 3795799  | 723369.4 | 1552903  |
| 413395.5 | 256395.2 | 47808.62 | 54916.93 | 39695.78 | 324996.3 | 716935   | 553694.7 | 68652.97 | 216340.9 |
| 1605951  | 1364807  | 73083.52 | 44704.22 | 290617.7 | 1737587  | 2065885  | 1347680  | 74431.07 | 654905   |
| 367936.1 | 238392.5 | 5327.948 | 30499.51 | 9708.582 | 0        | 812644.3 | 579983.5 | 124789.4 | 232019.9 |
| 20396141 | 25448962 | 160798.4 | 246396.3 | 1001784  | 5522463  | 29439899 | 58140889 | 0        | 5456745  |
| 995252.1 | 118352.3 | 1141475  | 1457711  | 1295312  | 906283.8 | 837929.5 | 1008318  | 869922.2 | 911073.3 |
| 8846274  | 12035560 | 412376.5 | 410273.8 | 952929.8 | 5782547  | 7157082  | 4017367  | 737145.4 | 2517920  |
| 45611557 | 55563840 | 680946.7 | 537784.7 | 20542505 | 546054.5 | 62883118 | 1.24E+08 | 0        | 10993324 |
| 109993.2 | 128715.6 | 77319.4  | 41962.74 | 230001   | 868801.5 | 177837.5 | 35748.46 | 10373.71 | 28358.6  |
| 82785055 | 1.48E+08 | 170940.5 | 61067.16 | 1224452  | 1383991  | 52039813 | 3.47E+08 | 33481.06 | 38393239 |
| 317790.3 | 192657.9 | 121774.7 | 173231.7 | 159814.5 | 305670.8 | 332954.6 | 308719.2 | 156303.5 | 100647.1 |
| 1842612  | 2625995  | 818662.3 | 668397.7 | 537186.2 | 296024.4 | 568464   | 6422302  | 28986.09 | 287418.4 |
| 395839.3 | 361101.6 | 36400.94 | 64919.44 | 68167.73 | 261318.7 | 574672.9 | 601628.4 | 27299.97 | 64652.76 |
| 8998714  | 13191898 | 257967.2 | 7224.973 | 0        | 168845   | 11526253 | 31879124 | 0        | 4729115  |
| 30963129 | 50346113 | 106574   | 4425.936 | 57524.75 | 1995965  | 29520898 | 1.2E+08  | 0        | 15117551 |
| 52910487 | 81598979 | 505675.8 | 297132.6 | 1082258  | 788295   | 60155790 | 1.95E+08 | 0        | 23896528 |
| 19293719 | 32074322 | 1369923  | 989425.6 | 1928006  | 1963426  | 12676052 | 76029988 | 21770.3  | 10843602 |
| 638187.4 | 378720.5 | 316057.4 | 246314.6 | 1004104  | 3642724  | 1369986  | 857992.7 | 19167.2  | 567660.2 |
| 10091724 | 2718124  | 89002.49 | 31866.71 | 540687.2 | 2100061  | 23092301 | 13907459 | 6626054  | 8614857  |
| 206951.6 | 170925.1 | 14010.81 | 23593.06 | 17127.58 | 231263.1 | 266553.5 | 490837.2 | 27759.2  | 174427.8 |
| 5195079  | 7074413  | 232704.2 | 229141.9 | 625071.9 | 3489854  | 4092770  | 2400456  | 413725.8 | 1408143  |
| 921048.9 | 1360396  | 354851.2 | 359563.4 | 366015.1 | 133948.2 | 117201.7 | 95948.63 | 3247825  | 1028276  |
| 1059499  | 703537.4 | 200277.6 | 315569.7 | 4359116  | 1255888  | 4385438  | 1446595  | 153365.7 | 455244   |
| 452512.5 | 441469.9 | 5333.267 | 2205.724 | 19496.99 | 502431.6 | 541890.8 | 732626.2 | 68710.9  | 297571   |
| 3877474  | 2973800  | 240282.1 | 59304.79 | 220763.1 | 6957417  | 2485374  | 3038774  | 1944965  | 690527.3 |

|          |          |          |          |          |          |          |          |          |          |
|----------|----------|----------|----------|----------|----------|----------|----------|----------|----------|
| 3870250  | 4298482  | 8982.833 | 18153.02 | 61713.6  | 2138601  | 5768600  | 10528019 | 460908.1 | 1061102  |
| 1169957  | 2277873  | 24503.53 | 20559.24 | 7825.766 | 247236   | 88858.75 | 37774.69 | 159651.5 | 49191.63 |
| 2.24E+08 | 3.03E+08 | 1756421  | 1190425  | 67979608 | 12230373 | 2.8E+08  | 7.09E+08 | 0        | 39762615 |
| 16068016 | 29182423 | 107501.4 | 38172.88 | 745941.9 | 674827.9 | 8585555  | 67962557 | 0        | 7365675  |
| 75194963 | 1.09E+08 | 112496.5 | 52790.27 | 2458559  | 8109648  | 93700541 | 2.58E+08 | 8103.688 | 18284258 |
| 1144882  | 536436.1 | 51654.13 | 84240.5  | 54589.29 | 6525.453 | 2610529  | 2018519  | 751004.3 | 866428.2 |
| 927068.5 | 797919.9 | 24160.43 | 9095.426 | 103175.3 | 369729.9 | 1709931  | 1923392  | 207857.3 | 531902.7 |
| 555999.1 | 889584   | 0        | 0        | 14728.13 | 144953   | 463761.6 | 2118763  | 12115.27 | 0        |
| 42746683 | 27376665 | 7702702  | 4292383  | 20648772 | 11778122 | 77525314 | 74344023 | 772443.1 | 48471091 |
| 1435561  | 442776.2 | 824316.1 | 1116038  | 1029561  | 1770983  | 1159923  | 1553636  | 1311945  | 1156132  |
| 188346.9 | 118517.3 | 0        | 0        | 0        | 17084.41 | 422160.9 | 345230.3 | 31849.06 | 119638.3 |
| 426086.4 | 638975   | 4164.277 | 0        | 15661.84 | 115496.2 | 434220.6 | 1519764  | 0        | 0        |
| 2794424  | 5752543  | 33906.03 | 49335.38 | 46160.47 | 65016.18 | 31226.24 | 97927.54 | 503299.6 | 13080579 |
| 117329.5 | 77451.93 | 106817.6 | 657786.3 | 294988.9 | 79466.96 | 62765.25 | 44894.44 | 114080.9 | 242478.3 |
| 1366118  | 893307.5 | 3830.031 | 12043.18 | 115069   | 640372.4 | 2745561  | 2012170  | 115169.3 | 766770.3 |
| 903835.3 | 1124694  | 263240.2 | 239172.8 | 401122   | 300153.6 | 618627.6 | 2769223  | 114104.9 | 138804.1 |
| 898016.5 | 769223.7 | 359301.8 | 258471.8 | 105305.6 | 167589.9 | 1456292  | 2055528  | 0        | 1174934  |
| 38971387 | 66184469 | 2301187  | 1832450  | 14278250 | 2026713  | 16034642 | 12159529 | 1617338  | 7024642  |
| 204282.3 | 179140   | 228346.7 | 93848.18 | 334761   | 989303.1 | 273695.9 | 92086.11 | 78421.45 | 142980.8 |
| 1125123  | 1990303  | 195186.9 | 14180.82 | 53625.69 | 309928.3 | 300738.1 | 360000.7 | 99236.14 | 214872   |
| 171075   | 80113.29 | 7584.42  | 5722.669 | 0        | 5665.586 | 395067.1 | 163377.9 | 115870.4 | 119543.9 |
| 15341823 | 21540748 | 3333570  | 1521748  | 9074529  | 8995.445 | 10788572 | 52190823 | 3451.222 | 7551962  |
| 85388358 | 1.07E+08 | 1002203  | 749265.5 | 33449021 | 3568449  | 1.18E+08 | 2.42E+08 | 0        | 16332880 |
| 105121.8 | 121170.1 | 25517.82 | 92334.46 | 70708.55 | 428224.1 | 3515814  | 57140.94 | 28427.68 | 35515.49 |
| 93512.59 | 121942.7 | 0        | 0        | 0        | 18678.09 | 137872.9 | 77140.66 | 11712.86 | 76649.62 |
| 28990180 | 40356806 | 151986.1 | 40751.08 | 1047269  | 1836587  | 40461123 | 94343192 | 0        | 6894369  |
| 2427083  | 3192041  | 115841   | 101610.3 | 290831.2 | 1563112  | 2267849  | 1088426  | 193341.7 | 790012.9 |
| 349389   | 452780   | 14177.57 | 0        | 25705.77 | 257033.3 | 336550.4 | 134491.4 | 5006.501 | 37537.17 |
| 4990327  | 5483734  | 504209.2 | 462671.9 | 1275782  | 246803   | 7964125  | 10489789 | 0        | 2481070  |
| 889538.1 | 516172.1 | 164294.5 | 98575.78 | 940924.3 | 5688904  | 3413733  | 1256774  | 89102.97 | 718724.9 |
| 4727545  | 4892365  | 368094.6 | 71584.46 | 2231209  | 2102780  | 6330525  | 3443160  | 156804.5 | 936393.2 |
| 1552838  | 1354701  | 4605.784 | 3977.793 | 16058.52 | 1484398  | 2358391  | 2062173  | 12592.89 | 248659.9 |
| 309839.3 | 448629.4 | 3120.669 | 15174    | 20071.74 | 207787.1 | 219042.2 | 134479.2 | 9955.615 | 102553.9 |
| 3324754  | 1965945  | 804451.4 | 487556.4 | 1861023  | 1742144  | 5479312  | 3889568  | 681877.9 | 1942286  |
| 7584250  | 11593857 | 825925.2 | 1187910  | 1460883  | 3144638  | 3647285  | 2498748  | 2739930  | 3062343  |
| 896567.6 | 651166.2 | 3344.799 | 5250.633 | 22206.32 | 632833.4 | 1654533  | 1726681  | 472234.6 | 1074810  |
| 18116219 | 21097859 | 2157514  | 1438150  | 137599.1 | 6587346  | 26201354 | 53948932 | 1123560  | 4288165  |
| 239086.6 | 303514.3 | 22104.31 | 18373.81 | 119609.7 | 1384656  | 10505083 | 251305.2 | 39142.02 | 86903.29 |
| 85992888 | 1.07E+08 | 898686   | 684476.4 | 17302200 | 6395150  | 1.3E+08  | 2.45E+08 | 0        | 13710727 |
| 95234.11 | 116509.9 | 0        | 0        | 14754.4  | 66880.09 | 105180.4 | 139009.9 | 4594.013 | 54478.21 |
| 247846.5 | 207958.6 | 86739.64 | 63100.09 | 243604.5 | 965792.5 | 1194450  | 128721   | 109301.6 | 64756.35 |
| 1463664  | 740521.4 | 10549.68 | 7493.112 | 11449.95 | 1571558  | 2569464  | 1532500  | 1146899  | 1881860  |
| 22283117 | 25803341 | 938685.1 | 818471.4 | 10598953 | 328305.1 | 32302246 | 55138114 | 0        | 5840888  |
| 175294.6 | 267052.2 | 0        | 0        | 0        | 117920.6 | 114979.1 | 48515.13 | 0        | 12955.72 |
| 30435.34 | 31095.55 | 8781.098 | 34218.69 | 46588.07 | 1131243  | 88384.12 | 28807.23 | 0        | 0        |
| 882011.9 | 728203.6 | 0        | 3180.667 | 4462.857 | 741718.8 | 1472613  | 1933016  | 71474.26 | 557772.4 |
| 267048.8 | 190195.8 | 8658.828 | 2903.646 | 8959.723 | 38609.22 | 573073.5 | 549941.6 | 60656.36 | 324958.4 |



|          |          |          |          |          |          |          |          |          |          |
|----------|----------|----------|----------|----------|----------|----------|----------|----------|----------|
| 348894.8 | 177099.3 | 60671.78 | 25156.65 | 162445   | 259216.6 | 592461.6 | 497583.6 | 82240.81 | 253835.7 |
| 1155214  | 982901.8 | 45249.89 | 21937.57 | 18865.1  | 53395.59 | 2411179  | 2585343  | 507991.8 | 1088058  |
| 18229612 | 31354741 | 1407923  | 4277.12  | 2296751  | 308782.6 | 12234821 | 73813906 | 26548.66 | 9790402  |
| 105654.5 | 159618.3 | 74132.58 | 78380.71 | 414158.3 | 5219166  | 116845.3 | 63122.7  | 15490.89 | 0        |
| 1602945  | 1107912  | 233062.9 | 156491.3 | 127140.7 | 2316393  | 1786205  | 1703964  | 78872.41 | 1099688  |
| 11883696 | 12551356 | 706867.1 | 426482   | 5834793  | 6727937  | 14230547 | 28470615 | 749589.7 | 22163926 |
| 7991378  | 5205510  | 1303734  | 443405.5 | 1898951  | 3503084  | 15041911 | 9594358  | 1348373  | 4127890  |
| 1724272  | 1195709  | 248395.1 | 365017.7 | 752439.2 | 623583   | 2975383  | 2425243  | 140937.9 | 1107013  |
| 9095718  | 9537205  | 7729762  | 5234429  | 1738042  | 2886488  | 4932506  | 25793836 | 7948775  | 3026924  |
| 29402466 | 42428560 | 215205.1 | 41030.46 | 2500837  | 1481759  | 37950043 | 1.01E+08 | 0        | 10733463 |
| 9464900  | 12955890 | 31442.55 | 15034.07 | 179430.3 | 2388822  | 12507927 | 30695453 | 299026.6 | 1313186  |
| 1.05E+08 | 1.41E+08 | 2547686  | 1989273  | 34616742 | 2840695  | 1.35E+08 | 3.28E+08 | 24777.47 | 23667360 |
| 60166.03 | 88325.43 | 8998.156 | 13668.76 | 92082.93 | 315659.2 | 237733.8 | 81830.99 | 5099.535 | 7686.431 |
| 11296767 | 13768318 | 565674.4 | 807841   | 9649928  | 5937940  | 6226702  | 14327370 | 143680.2 | 2078766  |
| 92146022 | 51227457 | 20562715 | 21485096 | 58410180 | 82401824 | 1.27E+08 | 1.13E+08 | 7849446  | 96986158 |
| 16999152 | 29487466 | 66049.36 | 49553.29 | 596527.1 | 2645703  | 11347028 | 69290083 | 0        | 4307684  |
| 154802   | 126136.4 | 18763.94 | 3408.274 | 125462.4 | 895618.2 | 795158.3 | 272798.9 | 45645.44 | 168343.2 |
| 9409009  | 9092766  | 4369482  | 1011045  | 3903991  | 3192575  | 11794920 | 23527793 | 12927.45 | 9828849  |
| 1065473  | 681695.1 | 0        | 3741.88  | 10743.83 | 440077   | 2230064  | 1347439  | 176607.8 | 924562.4 |
| 1318705  | 1253709  | 6731.044 | 0        | 21986.25 | 650502.1 | 2333304  | 2937037  | 221514.6 | 479482.4 |
| 8227540  | 13899251 | 55481.89 | 10474.76 | 0        | 338460.5 | 7392255  | 32857292 | 0        | 3546908  |
| 1156272  | 414606   | 2823.719 | 3316.604 | 5372.144 | 21445.57 | 2754256  | 1870735  | 802510.1 | 960964.7 |
| 387170.6 | 332086.6 | 168544.1 | 519081   | 465815   | 1584140  | 617879.8 | 385416   | 44461.41 | 198484   |
| 235518.1 | 398901.3 | 4485.034 | 0        | 0        | 39025.07 | 181580.3 | 938067.1 | 0        | 0        |
| 297412.9 | 200969.1 | 6582.394 | 12315.3  | 68282.13 | 2195299  | 1796600  | 427864.4 | 7538.236 | 224414.7 |
| 7685203  | 10074247 | 8405.477 | 64120.12 | 263034.3 | 278127.5 | 12026222 | 24389462 | 0        | 3876907  |
| 243374.2 | 241278.5 | 20126.95 | 0        | 333332.1 | 4560359  | 892570.7 | 529006.4 | 0        | 67465.82 |
| 309966.7 | 265964.4 | 16965.75 | 20227.59 | 53273.8  | 60961.05 | 591043.3 | 422355.9 | 22910.17 | 103133.6 |
| 509879.5 | 367458.6 | 3116.175 | 0        | 10480.3  | 340930.3 | 961259.6 | 862432.1 | 124736.3 | 447113.5 |
| 22136705 | 25900269 | 258353.9 | 207430.1 | 2925029  | 7657951  | 33151401 | 52784202 | 138540.8 | 47760564 |
| 1867048  | 1740716  | 502227.2 | 240170.8 | 203175.6 | 556346.2 | 3082790  | 4793044  | 404779.9 | 692954.7 |
| 3645582  | 2388925  | 706963   | 660124.9 | 1660280  | 3603764  | 4854810  | 2037075  | 571799.1 | 3905290  |
| 518992.1 | 488839.2 | 0        | 0        | 16017.95 | 439030.8 | 790619.8 | 613262.3 | 88488.04 | 613364.2 |
| 28934773 | 35821960 | 76688.97 | 47264.83 | 487833   | 6220148  | 45509563 | 85818532 | 784109.9 | 10018111 |
| 149880.2 | 124933.6 | 110275.1 | 150521.7 | 253557.7 | 378871.4 | 217273.2 | 176556.5 | 65070.77 | 60060.52 |
| 402521.6 | 34916.17 | 310158   | 460587.5 | 463022   | 589653.8 | 432215.6 | 414077.3 | 403889.8 | 342497.5 |
| 3003808  | 3365413  | 0        | 5208.693 | 0        | 415929.6 | 5403516  | 7621873  | 38604.8  | 561759.3 |
| 307424.4 | 521806.9 | 0        | 0        | 0        | 76587.13 | 218548.6 | 1223238  | 0        | 0        |
| 18292781 | 13821659 | 4283632  | 220477.6 | 5316956  | 10682742 | 30470841 | 37815149 | 3853233  | 7370919  |
| 5605696  | 1196923  | 2584356  | 5459681  | 7515137  | 8922286  | 12790963 | 7276922  | 4056942  | 5528611  |
| 45523    | 52783.66 | 34831.8  | 42621.64 | 41682.16 | 581014.2 | 93963.02 | 56361.89 | 9512.071 | 0        |
| 64054.02 | 49285.91 | 11488.63 | 17442.69 | 91949.59 | 286573.7 | 213544.9 | 105824.8 | 0        | 23023.58 |
| 24359416 | 34290362 | 24390216 | 17800524 | 7686176  | 1.78E+08 | 2.97E+09 | 9745350  | 15532534 | 85267828 |
| 1163299  | 511186.3 | 524166.9 | 539535.4 | 717660.2 | 4730977  | 4689846  | 1795294  | 439363.4 | 915851.4 |
| 1178856  | 885759.8 | 137204.1 | 167442.6 | 223074.4 | 1232405  | 1626760  | 1449099  | 143251.3 | 570053.6 |
| 25744746 | 26282785 | 644752.4 | 511875.2 | 9454649  | 7358863  | 40995087 | 57472952 | 0        | 5677285  |
| 14637130 | 8950657  | 1741475  | 1383194  | 3306298  | 20258420 | 17883428 | 21568439 | 2486759  | 8187693  |

|          |          |          |          |          |          |          |          |          |          |
|----------|----------|----------|----------|----------|----------|----------|----------|----------|----------|
| 1542146  | 1607736  | 8047.278 | 5641.805 | 143593.4 | 1372728  | 2011558  | 4270990  | 156423   | 867268.4 |
| 2415553  | 1666606  | 154674.9 | 87104.1  | 386827   | 375183.4 | 5043084  | 3989554  | 543165.1 | 1855909  |
| 7427360  | 6407662  | 1680198  | 757831.2 | 1587092  | 2479356  | 12645732 | 18434781 | 2452626  | 3394190  |
| 38318408 | 57617954 | 7133796  | 10290480 | 5851217  | 26511092 | 5391632  | 3924957  | 10086413 | 13537941 |
| 45482214 | 33924386 | 6439144  | 2856407  | 13360242 | 27105048 | 77009495 | 92841936 | 8879922  | 16942656 |
| 122126.1 | 83697.08 | 0        | 0        | 10269.41 | 56336.27 | 246133.8 | 114132.3 | 10221.62 | 80469.99 |
| 813279.8 | 1250752  | 0        | 0        | 6953.312 | 46486.85 | 976010.3 | 2925972  | 0        | 142290.7 |
| 409085.6 | 198373   | 126893.2 | 155551.9 | 260607.9 | 342738.5 | 570483.2 | 579082.2 | 130463.9 | 274053.1 |
| 1072512  | 613219   | 520094.8 | 208535.3 | 199998.7 | 1153784  | 1438909  | 649972.1 | 848321.4 | 424545.1 |
| 217334.8 | 126561.8 | 235481   | 241180.8 | 132678   | 469696.4 | 428035.6 | 199826.7 | 93147.07 | 112871.3 |
| 1202373  | 934055.8 | 346819.8 | 208601.3 | 290325.7 | 513189.2 | 2000312  | 2311349  | 61529.91 | 455241.6 |
| 4400867  | 5259941  | 38256.83 | 61059.44 | 59546.25 | 1027003  | 7155416  | 13451950 | 823895.4 | 1588801  |
| 78258338 | 75656417 | 11990587 | 3428818  | 45642533 | 17782117 | 1.15E+08 | 1.83E+08 | 50477.54 | 31241607 |
| 49273.34 | 34649.15 | 25692.94 | 355398.5 | 133798.5 | 30149.45 | 37302.08 | 33889.36 | 40417.59 | 109918.7 |
| 69728.22 | 62686.78 | 86389.65 | 105227.4 | 38912.31 | 286643.7 | 86682.1  | 174578.5 | 60545.79 | 13933.41 |
| 888851.4 | 569567.2 | 96857.79 | 54053.47 | 393463.8 | 287127.7 | 1671877  | 1387271  | 422088.3 | 335887.3 |
| 318382.7 | 343508.8 | 33485.65 | 15053.03 | 55420.88 | 335284.8 | 298388.1 | 175040.5 | 18051.2  | 82076.09 |
| 95716.77 | 94203.85 | 35282.31 | 31178    | 149395.6 | 321864.2 | 329772   | 176334.3 | 21068.78 | 12095.37 |
| 175139.9 | 89490.75 | 70683.49 | 29227.78 | 45428.93 | 240183.9 | 200360.2 | 110984.8 | 197792.7 | 56747.32 |
| 16617098 | 25021713 | 290263.3 | 91126.4  | 2404959  | 1933813  | 18197105 | 58649475 | 81297.04 | 20962160 |
| 9229614  | 12852466 | 65200.03 | 14983.12 | 3832389  | 1693328  | 9619650  | 31185097 | 0        | 2765168  |
| 208699.6 | 175709.8 | 29225.44 | 16100.44 | 24315.07 | 188036.5 | 303698.9 | 180211.1 | 9249.441 | 203928.8 |
| 795239.1 | 615799.4 | 57492.66 | 30629.04 | 267302.6 | 197972.3 | 1503022  | 1544248  | 161324.5 | 256076.7 |
| 345417.9 | 199731.3 | 393374   | 1902484  | 485562.8 | 298085.5 | 299755.7 | 145062.8 | 414748.3 | 633929.6 |
| 66504044 | 56447028 | 16537471 | 9448905  | 30365263 | 8336211  | 1.11E+08 | 1.49E+08 | 2133795  | 41865636 |
| 3369234  | 2288792  | 668488.1 | 580885   | 792839   | 4784669  | 3414647  | 7086288  | 1656702  | 1325381  |
| 29482696 | 39593253 | 138596.5 | 159993.8 | 1674192  | 8099735  | 39767496 | 94148270 | 8731.169 | 6858481  |
| 38937908 | 27566176 | 4927695  | 3320419  | 12749256 | 9672771  | 74320496 | 72818791 | 13449775 | 15380107 |
| 608452   | 106867.2 | 305393.5 | 598768.3 | 578441   | 611455.8 | 579392.4 | 555021.3 | 639741.4 | 527160.3 |
| 2138304  | 1284068  | 221789.6 | 218338.4 | 621795   | 2911557  | 2639458  | 2896707  | 339506.5 | 1216913  |
| 1269354  | 683366.4 | 434814.4 | 428147.8 | 596749.3 | 4651280  | 13150822 | 1130207  | 269183   | 1192782  |
| 503273   | 428213.5 | 15014.5  | 30852.64 | 49743.21 | 304441   | 876176.2 | 875520.3 | 21911.8  | 367765.5 |
| 3136639  | 1628344  | 728986.9 | 906048.4 | 2377271  | 3775445  | 3226171  | 5597838  | 1873293  | 2900168  |
| 9598516  | 13723157 | 1509810  | 2687534  | 2315060  | 4476186  | 4840558  | 3845007  | 1667390  | 3067886  |
| 5088656  | 2543745  | 1113061  | 4065019  | 2855447  | 2933660  | 7073976  | 8096098  | 1608083  | 3536709  |
| 1492564  | 854967.5 | 305982.3 | 362301.5 | 180479.2 | 1341614  | 2439834  | 2299171  | 278195.1 | 938528.6 |
| 1298500  | 876970.7 | 333525.3 | 164291.2 | 684525.2 | 557125   | 2153682  | 2288618  | 64055.23 | 816025   |
| 9461265  | 10470403 | 2207265  | 1192378  | 3420971  | 1552642  | 12906500 | 1976587  | 1297566  | 3603013  |
| 7765177  | 11225942 | 2260.884 | 24232.78 | 256343.3 | 902816.8 | 10251137 | 26857087 | 25004.56 | 2017647  |
| 9101336  | 13991125 | 440979.5 | 202913   | 1096512  | 4624085  | 6170570  | 33963568 | 941795.9 | 1840758  |
| 9158872  | 10798870 | 53611.1  | 47574.03 | 356959   | 521459.6 | 16174065 | 24141113 | 0        | 3882034  |
| 5.15E+08 | 2.83E+08 | 1.22E+08 | 1.29E+08 | 3.33E+08 | 4.63E+08 | 7.05E+08 | 6.32E+08 | 47442262 | 5.43E+08 |
| 1060008  | 1090216  | 129821   | 29519.07 | 699730.6 | 364677.1 | 1352329  | 794344.5 | 19011.74 | 192415.5 |
| 120374.4 | 68719.49 | 65699.46 | 6264.337 | 82067.52 | 822077.6 | 442287.2 | 193993.9 | 112826.1 | 133928.7 |
| 7536964  | 4884047  | 36224.74 | 20777.48 | 181175.9 | 9166222  | 11720357 | 11001651 | 816745.7 | 4855742  |
| 739028.8 | 894077.4 | 191538.4 | 138002.5 | 760959   | 2741359  | 21872753 | 446518.8 | 89439.8  | 334375.9 |
| 436894.4 | 661843.6 | 9450.118 | 0        | 23870.21 | 263303.5 | 322040   | 194910.4 | 6486.952 | 110258.7 |

|          |          |          |          |          |          |          |          |          |          |
|----------|----------|----------|----------|----------|----------|----------|----------|----------|----------|
| 2635188  | 3375492  | 122746.3 | 75710.54 | 327737.2 | 1953846  | 2567771  | 1366140  | 268312.4 | 840049.5 |
| 87401.93 | 76940.66 | 32781.14 | 20881.68 | 50135.15 | 40990.21 | 103922.4 | 153259.4 | 0        | 32849.06 |
| 16295996 | 24603364 | 36035.78 | 20252.36 | 566076.1 | 1958974  | 19641826 | 58446825 | 8089.411 | 3887892  |
| 792071.6 | 1082385  | 118827.7 | 118188.7 | 447072.9 | 261743.7 | 475381.6 | 207354.9 | 484440.5 | 144893.2 |
| 174414.3 | 68822.81 | 43373.72 | 61532.69 | 53935.87 | 259772.5 | 190138.6 | 215483.1 | 207691.9 | 118346.4 |
| 313797.9 | 402237.1 | 4342.83  | 0        | 0        | 211566.5 | 369588.4 | 1000519  | 17917.63 | 147561   |
| 98916453 | 1.21E+08 | 670971.3 | 440801.9 | 19566288 | 11063580 | 1.55E+08 | 2.79E+08 | 0        | 15632359 |
| 39765720 | 29710136 | 10141211 | 4016013  | 15290342 | 31268700 | 57483006 | 25992923 | 881779.8 | 71527584 |
| 155248.5 | 120807.4 | 33089.6  | 23695.1  | 130169.5 | 625310.6 | 967679.4 | 324331.9 | 22274.13 | 59950.37 |
| 116345.1 | 83176.3  | 122945.1 | 154201.1 | 127728.1 | 176026.6 | 203343.1 | 148477.3 | 22677.19 | 59892.97 |
| 8942723  | 6258749  | 41268.47 | 15181.36 | 108716.8 | 4682031  | 17995307 | 15225458 | 3074893  | 8581735  |
| 97124915 | 1.57E+08 | 1766523  | 1751404  | 33500716 | 923847.8 | 77786269 | 3.75E+08 | 0        | 39767318 |
| 11225485 | 8032621  | 824739.3 | 578558.1 | 3100486  | 16574924 | 11501731 | 16618126 | 1428558  | 4846828  |
| 237072.2 | 159271.5 | 33339.37 | 11691.27 | 84740.02 | 207806.4 | 371032.5 | 189582.2 | 31599.48 | 168561.8 |
| 3516276  | 4436892  | 1213062  | 1652538  | 311746.3 | 1780706  | 2236747  | 1266843  | 1683056  | 851016.8 |
| 240104.8 | 79508.27 | 225054.3 | 309664.3 | 290382.4 | 280210.9 | 288496.5 | 218765.1 | 231841.5 | 275206.5 |
| 1477741  | 738609.7 | 108518.2 | 317779.3 | 362112.8 | 773209.9 | 2853939  | 1911495  | 498511.5 | 1053466  |
| 45805.8  | 69353.8  | 6157.557 | 9742.648 | 69464.68 | 334677.2 | 150498.9 | 10604.87 | 0        | 6534.133 |
| 8009414  | 12182755 | 590282.3 | 180470   | 157523.8 | 5185399  | 5266375  | 29615592 | 130130.2 | 4289973  |
| 91852.28 | 51575.35 | 42607.18 | 34832.27 | 70079.85 | 371820.8 | 344876.2 | 98348.66 | 28495.43 | 52321.26 |
| 23477265 | 32358762 | 8782.363 | 0        | 255955.9 | 1012388  | 35675851 | 77357387 | 0        | 8891716  |
| 58467587 | 85141749 | 6511519  | 3539865  | 19814441 | 1084922  | 59424674 | 2.05E+08 | 0        | 19968894 |
| 231150.5 | 86447.97 | 2557.699 | 3011.345 | 13648.27 | 22194.13 | 541993.6 | 291888.1 | 258332.4 | 323793.4 |
| 423297.4 | 299363   | 279314.3 | 410253.2 | 587637   | 852362.8 | 848722.1 | 477029.3 | 82974.88 | 340065   |
| 295386.7 | 338550.8 | 174671.5 | 139151.9 | 521721.5 | 1884080  | 524230.7 | 181078.2 | 96018.57 | 94597.4  |
| 2011767  | 1197402  | 144560.6 | 206098.3 | 533929   | 2783635  | 2527938  | 2626364  | 330277.5 | 1170693  |
| 803409.5 | 367894.5 | 288752.5 | 668394.7 | 647255.2 | 866314.4 | 609605.6 | 621670.6 | 624893.9 | 568350.8 |
| 265075.6 | 263383.3 | 0        | 0        | 6195.432 | 49881.73 | 513753.1 | 380094.1 | 23471.97 | 224871.3 |
| 6473493  | 4554231  | 1747742  | 890837.2 | 1071983  | 2073316  | 12143396 | 11920659 | 936693.2 | 3338021  |
| 7190651  | 8468853  | 218228.4 | 36328.9  | 1363486  | 2583750  | 10546986 | 21282372 | 640882.7 | 1867105  |
| 82960.16 | 59567.76 | 40698.57 | 31201.08 | 67194.38 | 674018   | 241976.3 | 85152.09 | 0        | 51404.33 |
| 198508.5 | 174493.5 | 52936.99 | 44108.67 | 61227.46 | 255601.3 | 142017.5 | 441239.4 | 50802.44 | 124735.5 |
| 1242231  | 1206290  | 102167.3 | 17803.35 | 225757.9 | 1828735  | 891650.9 | 2428997  | 5379.039 | 97478.88 |
| 663979.9 | 464942.5 | 138492.5 | 28707.97 | 220894.3 | 300816.8 | 1193648  | 1171023  | 238966.7 | 280514.3 |
| 4692438  | 5436883  | 1249965  | 322567.1 | 3448004  | 684036.7 | 4726230  | 12521240 | 111912.4 | 8244033  |
| 189356.9 | 284505.7 | 0        | 92326.74 | 219032.7 | 2784620  | 594951.3 | 202975.2 | 6521.302 | 0        |
| 1272695  | 792199.7 | 118892.5 | 119706.4 | 502346.1 | 1252864  | 1933487  | 2135502  | 251050.9 | 660441.4 |
| 11450786 | 7016216  | 4760993  | 9294751  | 26272292 | 18444908 | 23872093 | 9906463  | 2035642  | 17390015 |
| 5073397  | 7764527  | 734394.3 | 653249.5 | 1113158  | 574792.2 | 4146099  | 18502150 | 0        | 5083228  |
| 3913091  | 2564410  | 2141313  | 14056074 | 7851859  | 4557069  | 3079774  | 1892489  | 2433644  | 8336231  |
| 109062.5 | 89221.4  | 7499.168 | 7478.906 | 33938.56 | 63125.07 | 182315.3 | 228998.3 | 0        | 44850.22 |
| 27585468 | 39823265 | 4244341  | 2265045  | 14174143 | 98014.35 | 23590638 | 95799161 | 3120.065 | 11276659 |
| 227616.4 | 191606.7 | 9202.544 | 6595.902 | 50649.69 | 162225.1 | 372997.6 | 117197.9 | 23727.23 | 154667.9 |
| 8549839  | 12985403 | 108551.1 | 78773.72 | 155317.5 | 2659094  | 9022124  | 31377829 | 10989.47 | 6303827  |
| 632147.7 | 390096.7 | 0        | 0        | 5084.257 | 12355.99 | 1466693  | 860778.9 | 109025.5 | 576056.3 |
| 550983.4 | 755770.9 | 0        | 2502.486 | 6400.661 | 85384.4  | 804728.9 | 860929.5 | 5090.71  | 100233.2 |
| 731051.6 | 527217.8 | 2846.715 | 17476.66 | 40253.53 | 597342.7 | 1310547  | 1176438  | 410602.3 | 718673.5 |

|          |          |          |          |          |          |          |          |          |          |
|----------|----------|----------|----------|----------|----------|----------|----------|----------|----------|
| 1805566  | 1221675  | 39813.09 | 61605.21 | 2421128  | 598060.4 | 2233811  | 3749651  | 1387170  | 515705.6 |
| 709952.6 | 736801.6 | 0        | 11498.16 | 0        | 538090   | 1073814  | 1908838  | 0        | 374472   |
| 346321.5 | 287866.3 | 33340.86 | 20056.35 | 38381.92 | 663670.8 | 109642.2 | 756671.3 | 69132.17 | 119453.6 |
| 3016450  | 506148.2 | 1986702  | 2430388  | 2358375  | 3747037  | 2732847  | 3319833  | 2514288  | 2681859  |
| 2610270  | 1278736  | 863171   | 414102   | 1364020  | 1934298  | 4214959  | 3649555  | 717420.5 | 2006106  |
| 29779057 | 22371224 | 7449772  | 4389325  | 5718923  | 11545414 | 53457063 | 56116650 | 1012679  | 16271218 |
| 4862981  | 6929590  | 2085.109 | 0        | 143477.1 | 192484.3 | 7046272  | 16469963 | 0        | 1839888  |
| 1941925  | 2647917  | 62083.86 | 98537.24 | 217776.3 | 1331683  | 1742632  | 856353.1 | 167504.4 | 538464.3 |
| 121314   | 109106.1 | 80186.08 | 271818.5 | 379679.6 | 189475.7 | 60356.1  | 302884.8 | 98510.15 | 127794.3 |
| 1016605  | 1070420  | 43340    | 37593.62 | 190655.9 | 478687.7 | 1583523  | 2729358  | 39721.35 | 192167.4 |
| 142225   | 191282.3 | 2471.13  | 5686.955 | 6743.817 | 136832.1 | 104672.3 | 160647.3 | 13609.43 | 52787.06 |
| 2005901  | 3079525  | 62748.22 | 12217.93 | 41587.18 | 733004.5 | 1944822  | 7436167  | 57171.38 | 1075164  |
| 13068170 | 21951382 | 27549.38 | 36432.72 | 235079.6 | 373013.8 | 13139314 | 51964366 | 6202.212 | 5724893  |
| 3515244  | 2900908  | 386422   | 316706.8 | 1414221  | 988410.1 | 6205240  | 6888224  | 773353.6 | 1264097  |
| 1682075  | 1028552  | 639945.9 | 254679.2 | 617123.5 | 622114   | 2994294  | 3195286  | 436563   | 1131770  |
| 928584.1 | 474051.7 | 152096.9 | 81506.16 | 361614   | 1131824  | 1305147  | 1190038  | 213609.5 | 773110.8 |
| 6698696  | 10475795 | 29163.99 | 0        | 219893.6 | 105548.6 | 8214174  | 25027596 | 74072    | 5535268  |
| 4802264  | 5309383  | 1245997  | 331357.2 | 2270879  | 399224.6 | 6655422  | 12888772 | 0        | 1471256  |
| 10062363 | 13595007 | 1310062  | 1355353  | 2955541  | 7458907  | 5613324  | 3937570  | 987514.6 | 3401851  |
| 6340854  | 11129057 | 5904.88  | 2576.785 | 224062.7 | 160175.1 | 5394248  | 26089687 | 48083.26 | 3410742  |
| 12020552 | 14530742 | 733765.3 | 626542.9 | 1614553  | 9926120  | 12342459 | 6797496  | 1178696  | 4048069  |
| 1424031  | 861887.1 | 132598   | 166403.9 | 146988.5 | 234999.7 | 3053256  | 1809509  | 203051.7 | 1370882  |
| 385756.9 | 274495.8 | 0        | 8620.181 | 0        | 145634.3 | 808943.1 | 493466.5 | 35346.24 | 320069.7 |
| 51989277 | 88830656 | 548110.1 | 599428.5 | 2749357  | 20008420 | 30468784 | 2.1E+08  | 195748.3 | 23284651 |
| 570057.2 | 608439.6 | 12455.34 | 5188.659 | 11606.34 | 549201.7 | 729736.1 | 1595041  | 52747.58 | 356538.1 |
| 277133.6 | 448946.6 | 40388.27 | 65697.4  | 46596.5  | 134823.4 | 64808.79 | 49560.14 | 32139.17 | 87678.31 |
| 769311.3 | 733163.8 | 230853.1 | 264255.9 | 177890.6 | 487641.2 | 918098.4 | 660323.1 | 184169   | 148023   |
| 14613362 | 13104729 | 4856165  | 3170058  | 7460151  | 1641895  | 22101877 | 33512478 | 456601.2 | 15462530 |
| 1.4E+08  | 1.75E+08 | 2085253  | 1368763  | 11325528 | 42625935 | 2.08E+08 | 3.82E+08 | 855756.8 | 2.71E+08 |
| 26395940 | 18836051 | 5945244  | 5220101  | 16753420 | 57087.94 | 46626336 | 49376966 | 5224066  | 9281123  |
| 1236807  | 741876.2 | 89685.83 | 12983.31 | 45757.72 | 345925.5 | 2692025  | 2090283  | 207864.3 | 1185143  |
| 2996545  | 4506794  | 111572.1 | 40170.81 | 519436.4 | 279510.7 | 3401673  | 10987080 | 29904.58 | 1044965  |
| 1016552  | 1811383  | 5779.013 | 5443.183 | 30392.6  | 63794.87 | 781548.3 | 178236.5 | 90509.21 | 425918.8 |
| 112354.2 | 76990.01 | 90963.76 | 116691.4 | 165013.5 | 357560.6 | 119911.7 | 118060   | 40047.8  | 49266.45 |
| 214529.6 | 181296.7 | 140566.9 | 926127.6 | 531137.5 | 208306.8 | 122409.6 | 100114.5 | 186582.6 | 530758.2 |
| 315045.2 | 72734.48 | 255616.6 | 304416.9 | 329397   | 326772   | 92071.25 | 230301.5 | 312288.7 | 261001.5 |
| 10317168 | 15215161 | 4283399  | 1860389  | 5510289  | 242272.5 | 4612698  | 36955071 | 82793.27 | 8641149  |
| 277255.6 | 167973.2 | 181262.7 | 201382.7 | 260830.8 | 826059   | 666871.1 | 385240.8 | 52217.86 | 141458.2 |
| 719790.4 | 1114614  | 52589.95 | 4601.473 | 0        | 325564.1 | 621249.2 | 2593253  | 11615.92 | 0        |
| 1170757  | 1104149  | 0        | 0        | 0        | 613390.4 | 2132194  | 1238177  | 137914.4 | 977882.9 |
| 11523791 | 16813868 | 120013.9 | 142811.2 | 878359.4 | 871696.4 | 15362313 | 40360952 | 4714.555 | 4351754  |
| 383823   | 311729.6 | 264294   | 1706046  | 845767.8 | 386270.4 | 241295.7 | 129161.2 | 270498.5 | 927490.2 |
| 6433776  | 7697504  | 5395.302 | 19375.46 | 174639.3 | 5734076  | 7453745  | 12348241 | 207224.1 | 2178417  |
| 449002.3 | 458553.4 | 5178.072 | 0        | 4080.842 | 10633.25 | 908156.3 | 573378.3 | 22513.33 | 101523   |
| 191709.6 | 200450.5 | 0        | 0        | 10379.76 | 923914.3 | 3854447  | 309845.4 | 15654.4  | 118650.6 |
| 1218926  | 1035019  | 24771.23 | 21913.98 | 106642.4 | 1028016  | 1996649  | 1773352  | 224602   | 809383.5 |
| 291733.9 | 192466.1 | 6964.02  | 7258.296 | 13448.54 | 147275.9 | 595242.8 | 519909.9 | 31939.37 | 225170.2 |

|          |          |          |          |          |          |          |          |          |          |
|----------|----------|----------|----------|----------|----------|----------|----------|----------|----------|
| 3641823  | 4131201  | 1763357  | 687049.3 | 2726042  | 1784834  | 1726398  | 10662326 | 125769.1 | 3770423  |
| 115526.3 | 79269.82 | 0        | 0        | 7194.22  | 116138.4 | 197278   | 188851.2 | 23278.94 | 52994.72 |
| 1657929  | 1215844  | 634073.5 | 350827.4 | 1732246  | 1113857  | 1494404  | 1127880  | 1865038  | 618238.6 |
| 635534.5 | 651169.5 | 41348.51 | 21581.01 | 92770.5  | 613927.9 | 781171.6 | 432301.9 | 39572.24 | 225077.5 |
| 50248350 | 84181198 | 510769.1 | 400274.5 | 2803593  | 1859093  | 49859067 | 1.98E+08 | 210482.6 | 2519760  |
| 233538.4 | 324226.7 | 0        | 3764.658 | 8937.68  | 112273.8 | 274092.4 | 52226.84 | 0        | 46204.36 |
| 63023817 | 1.38E+08 | 47822.92 | 46361.12 | 47380.7  | 83948.36 | 34518.46 | 339396.9 | 4614393  | 211601.5 |
| 1162364  | 880114.3 | 330726.5 | 215101.9 | 594865.4 | 384471.1 | 1882328  | 2363908  | 191252   | 420953.1 |
| 28513209 | 31347913 | 8784239  | 1389593  | 21614956 | 6416327  | 29961096 | 73120750 | 1850546  | 49882306 |
| 1627968  | 988944.2 | 3043.755 | 11832.38 | 7610.743 | 739844.1 | 3477562  | 2199845  | 331993.9 | 1366933  |
| 5304739  | 7450168  | 12123.15 | 2582.727 | 98439.84 | 913295.3 | 7540476  | 17121460 | 0        | 75036.09 |
| 122762.8 | 105030.9 | 28577.49 | 6226.35  | 37326.53 | 29687.99 | 218571.5 | 189195.1 | 6623.891 | 33228.17 |
| 178121.9 | 131551.4 | 44566.52 | 36741.95 | 47021.91 | 169552.4 | 244001.5 | 136095.5 | 54353    | 65973.54 |
| 376151.8 | 104360.8 | 324128.8 | 521279.4 | 399755   | 515584.1 | 408147.2 | 341515.9 | 343974.3 | 333836.4 |
| 1450423  | 222595.2 | 1111639  | 1429671  | 1567360  | 1000410  | 1438936  | 1802073  | 1197190  | 1370640  |
| 13460560 | 12363154 | 3004134  | 1443213  | 1630245  | 22573862 | 5735825  | 19485478 | 177567.3 | 4091699  |
| 3708042  | 2525717  | 407557.8 | 172822.4 | 1498031  | 1004676  | 7179604  | 5577316  | 1108685  | 1912060  |
| 3323050  | 437171.9 | 2029529  | 2532112  | 2720579  | 4204537  | 3105196  | 3466685  | 2793446  | 3200247  |
| 19567996 | 25915334 | 1044659  | 1045786  | 5110720  | 6154429  | 23314307 | 64330717 | 59348.54 | 14431543 |
| 1939022  | 1742953  | 3064578  | 1898121  | 7031463  | 680013.2 | 3392252  | 4897276  | 419494.1 | 1962954  |
| 32395993 | 44238355 | 313610.5 | 139048.8 | 1411803  | 3769571  | 48664482 | 1.04E+08 | 0        | 7133549  |
| 3465165  | 2688956  | 1040385  | 394589.3 | 5123769  | 512496.7 | 2999770  | 6953983  | 5712647  | 964160.1 |
| 2.04E+09 | 1.8E+09  | 4.45E+08 | 2.28E+08 | 7.96E+08 | 3.39E+08 | 3.51E+09 | 4.64E+09 | 51202058 | 1.07E+09 |
| 916880.1 | 678859.6 | 89702.47 | 90013.7  | 120068.7 | 69063.21 | 1927530  | 1916692  | 104687.5 | 545181.3 |
| 972638.5 | 892166.3 | 32661.87 | 0        | 55160.8  | 1603324  | 737955.2 | 2352896  | 34602.16 | 377064.2 |
| 1.61E+08 | 2.5E+08  | 14761326 | 9363445  | 53575334 | 2152882  | 1.48E+08 | 5.97E+08 | 9625.102 | 53521256 |
| 5080739  | 6837588  | 138268.1 | 29406.97 | 28394.77 | 1004926  | 7569128  | 16674477 | 410477.2 | 1649054  |
| 119187.7 | 91784.81 | 69476.06 | 98763    | 129317.6 | 425172   | 246294.1 | 158408.3 | 13132.37 | 60022.78 |
| 72387238 | 1.16E+08 | 754330.8 | 287191.1 | 1829883  | 11833650 | 77350607 | 2.78E+08 | 262325.7 | 28359794 |
| 10366080 | 12939742 | 510352.3 | 480486.3 | 1336707  | 8304714  | 10575636 | 5554056  | 913404.9 | 3307706  |
| 718544.4 | 569965.5 | 90570.7  | 100688.2 | 78004.36 | 31699.53 | 1475997  | 1169893  | 285487.9 | 758558.2 |
| 347515.2 | 147083.2 | 6902.958 | 0        | 11691.01 | 223079.8 | 732715.8 | 538656   | 219753.8 | 348848.3 |
| 2138398  | 1327737  | 106536.5 | 95926.74 | 285252.3 | 2224346  | 3567059  | 3217965  | 333747.5 | 1176321  |
| 809395.1 | 578128.5 | 166995.1 | 234548.5 | 309955.7 | 981479.5 | 858957.3 | 944762.8 | 324805.8 | 92001.32 |
| 107538.9 | 60104.42 | 107237.4 | 111248.3 | 114790.3 | 328736.6 | 121463.4 | 192675.3 | 76217.2  | 33083.64 |
| 2.73E+08 | 5.97E+08 | 42840.5  | 6371.898 | 1653583  | 338143.1 | 3862290  | 16630425 | 69929.79 | 1.34E+09 |
| 2010183  | 3058733  | 129632.4 | 60524.99 | 249267.7 | 824231.2 | 1736266  | 461355.1 | 1440811  | 7414761  |
| 4363966  | 6099456  | 907813.5 | 1375588  | 1403489  | 2409983  | 1828256  | 1461898  | 1418932  | 1824618  |
| 333081.3 | 363515   | 84532.62 | 203640.8 | 270643.9 | 54560.38 | 211764.3 | 287809.7 | 962724.2 | 36005.84 |
| 12905280 | 15520445 | 99648.05 | 76809.25 | 1466473  | 5438732  | 19252608 | 38139491 | 10316.29 | 4395255  |
| 138059   | 237626.7 | 87612.98 | 155909.6 | 198253.6 | 4072987  | 174635.3 | 28415.83 | 21770.74 | 34331.27 |
| 84021.71 | 65343.09 | 22741.41 | 38102.04 | 47177.27 | 53139.15 | 101620.1 | 125096.4 | 8532.515 | 36061.9  |
| 446445.4 | 234836.1 | 135866.3 | 49706.28 | 255671.6 | 201153.2 | 788930.3 | 650822.6 | 116013.8 | 281363.6 |
| 29505862 | 14419154 | 8984459  | 5088251  | 16425854 | 24881150 | 45848239 | 41188861 | 8886177  | 22133214 |
| 99983.11 | 51391.95 | 17610.15 | 16105.11 | 20903.19 | 139983.6 | 129675.1 | 90092.46 | 139853.5 | 81809.97 |
| 105499.6 | 128014.4 | 0        | 0        | 4841.675 | 124087.1 | 90152.5  | 315555.5 | 6517.541 | 0        |
| 1762737  | 768574.7 | 930180.9 | 302551.1 | 526895.5 | 2756819  | 1613777  | 2639876  | 1103412  | 871026.4 |

|          |          |          |          |          |          |          |          |          |          |
|----------|----------|----------|----------|----------|----------|----------|----------|----------|----------|
| 176491.4 | 72674.34 | 60325    | 185444.4 | 336784.5 | 197943.1 | 514393.3 | 218656.3 | 60882.8  | 227277.6 |
| 193635   | 177265.1 | 5942.275 | 3216.653 | 19219.42 | 177954.2 | 290885.9 | 231019.9 | 41836    | 169552.7 |
| 315769.5 | 535109.5 | 0        | 0        | 0        | 53744.62 | 294713.3 | 1254327  | 0        | 0        |
| 401196.6 | 226214.1 | 99492.63 | 440117.3 | 265260   | 199344.6 | 422484   | 558849.6 | 81010.31 | 242027.8 |
| 2165407  | 2318245  | 592083.7 | 282207.7 | 659183.2 | 1442527  | 2400584  | 1055689  | 338429.4 | 924155.4 |
| 1450331  | 1031027  | 334720.6 | 205048.5 | 1114403  | 6008755  | 7869130  | 2034124  | 120287.3 | 725919.2 |
| 1699865  | 1355443  | 133189.8 | 124221.1 | 250859.3 | 2268430  | 2015779  | 1579833  | 139286.9 | 635753.6 |
| 1396208  | 894121.9 | 207000.9 | 64827.85 | 389105.8 | 914489.5 | 2532887  | 2073329  | 287171   | 724392.2 |
| 487309.1 | 455804.8 | 27876.07 | 29919.77 | 84730.94 | 315978.6 | 782836.7 | 1107873  | 106534.2 | 351540.7 |
| 316617.5 | 261877   | 41347.91 | 16890.01 | 102861.4 | 90658.58 | 582103.4 | 740291.3 | 81004.05 | 136558.5 |
| 464116.6 | 485014.3 | 58305.78 | 44168.27 | 84787.9  | 646397.8 | 296991.6 | 1030649  | 5218.823 | 0        |
| 36924383 | 44593864 | 896004.1 | 1333522  | 15249883 | 2225008  | 55664611 | 99307489 | 90687.2  | 6071431  |
| 2602048  | 4183997  | 6162.896 | 4028.52  | 27028.51 | 1210092  | 2170260  | 10012903 | 129775.3 | 419432.7 |
| 1292629  | 1376620  | 120605.9 | 268000.7 | 255694.2 | 72416.58 | 2204998  | 530905.4 | 120805.6 | 1830941  |
| 272956.5 | 333411.4 | 204141.2 | 718760.7 | 492537.2 | 888271.8 | 74716.02 | 17527.32 | 832986.2 | 195976.5 |
| 32356823 | 44968324 | 74875.62 | 62614.12 | 730799.9 | 3739524  | 48789827 | 1.05E+08 | 0        | 7336907  |
| 834310.2 | 913522.6 | 109404.1 | 119169   | 390463.1 | 952401.9 | 454673.5 | 274102.7 | 1191542  | 48988.47 |
| 3402294  | 3200124  | 7835.139 | 2739.587 | 176854.1 | 4190663  | 4237623  | 4972022  | 162019.7 | 2628313  |
| 2479710  | 1549018  | 13585.09 | 9353.415 | 802322.4 | 2014662  | 4421270  | 4399755  | 425568   | 2031922  |
| 11843218 | 6518891  | 6105197  | 3661944  | 9761994  | 4504546  | 17072865 | 18462674 | 1049216  | 13789254 |
| 4939522  | 5878104  | 3631217  | 276614.2 | 567914.5 | 1039047  | 5376225  | 14026213 | 83416.47 | 1048024  |
| 622489   | 730653.4 | 209049   | 280052.3 | 310323.3 | 363301.7 | 298777.5 | 138876.2 | 197099   | 216577   |
| 31301.76 | 38329.99 | 35912.51 | 28097.54 | 47938.57 | 333310.7 | 21437.76 | 80053.81 | 0        | 0        |
| 11724723 | 13406811 | 675235.1 | 599137.1 | 1766337  | 10630788 | 12947500 | 7425778  | 1204525  | 4464820  |
| 1621477  | 986128.1 | 4594.797 | 9622.714 | 41056.3  | 1879861  | 2720541  | 2062252  | 266727.7 | 925602.5 |
| 324300.3 | 435084.9 | 34056.84 | 150510.1 | 1034988  | 1446910  | 531932.7 | 309414   | 62703.76 | 41113.43 |
| 11698067 | 16234156 | 40546.4  | 86063.01 | 1509522  | 3592703  | 15059572 | 38968205 | 0        | 2822085  |
| 1620177  | 1192495  | 110721.1 | 95139.09 | 421484.5 | 2464075  | 1625065  | 2447588  | 170403.7 | 664058   |
| 207665.9 | 166011.9 | 0        | 3049.318 | 5439.091 | 37637.68 | 447167.5 | 464244.7 | 35896.9  | 160291.2 |
| 49632.69 | 35852.78 | 103465.3 | 32863.94 | 45623.28 | 926966.3 | 25716.86 | 16954.31 | 95830.81 | 70634.23 |
| 1501640  | 1654244  | 109737   | 23172.62 | 377872.2 | 350855.7 | 2474502  | 4119146  | 15491.14 | 160124.2 |
| 706305.1 | 350782.1 | 156579.2 | 615506.3 | 418104   | 433378.4 | 941093.7 | 1086856  | 240623.1 | 446296.3 |
| 125363.6 | 120754.8 | 21974.7  | 30697.28 | 28760.94 | 167879.8 | 84038.75 | 81511.74 | 51175.4  | 49064.86 |
| 1227502  | 1325162  | 390000   | 48870.71 | 971221.1 | 958204.6 | 712304.3 | 94896.55 | 331445   | 1943994  |
| 366943.2 | 348943.2 | 49089.6  | 163965   | 208414.8 | 350814.1 | 254687.1 | 187398.7 | 92496.27 | 108733.6 |
| 472325.8 | 422453.2 | 303188.2 | 326452.9 | 274056.1 | 421715.3 | 58834.2  | 375959.6 | 115395.7 | 73560.11 |
| 47186897 | 78312283 | 856108.5 | 630119   | 1865513  | 1658910  | 50811561 | 1.84E+08 | 0        | 2139674  |
| 2798840  | 1580437  | 517823.3 | 1123837  | 20233747 | 4987822  | 5351879  | 2779276  | 420979.3 | 3326294  |
| 156785.1 | 135751.8 | 52501.55 | 20826.2  | 111487.2 | 493580.2 | 7839827  | 139577.8 | 60443.41 | 47246.75 |
| 944316.4 | 480885.6 | 99955.35 | 148870.8 | 101890.6 | 1942357  | 439010.1 | 1549333  | 253558.5 | 801629   |
| 4916854  | 7595835  | 90204.39 | 18460.04 | 0        | 12041.32 | 6635832  | 18224124 | 0        | 2874144  |
| 175314.6 | 185617.8 | 10986.95 | 8044.108 | 55283.6  | 736330   | 21340988 | 395702.8 | 0        | 76047.83 |
| 508351.6 | 431545.1 | 141964.5 | 145403.4 | 161897.3 | 2015416  | 4009165  | 817228.5 | 27533.51 | 306791.2 |
| 5717775  | 4518190  | 1410351  | 33286.17 | 3683649  | 1465830  | 9535049  | 12744898 | 1945060  | 1874045  |
| 1195948  | 1592701  | 6300.665 | 2506.073 | 8880.068 | 116798.6 | 1949893  | 1404453  | 4568.196 | 361629.9 |
| 394461   | 249853.1 | 159367.8 | 176981.6 | 382121.9 | 1141592  | 1709639  | 399278.4 | 133768.4 | 162250   |
| 31090924 | 44891200 | 4866584  | 2841193  | 15173769 | 266770.5 | 29559428 | 1.08E+08 | 0        | 11989555 |

|          |          |          |          |          |          |          |          |          |          |
|----------|----------|----------|----------|----------|----------|----------|----------|----------|----------|
| 497642   | 368177.6 | 16682.43 | 20632.79 | 47836.59 | 212405.8 | 1003848  | 471679.1 | 46467.16 | 331267.8 |
| 176770.8 | 270034.6 | 183940.1 | 132943.9 | 457279.2 | 175353.8 | 706363.8 | 655005   | 4038.383 | 109551.4 |
| 5565031  | 4499484  | 5542.284 | 7434.576 | 360108.1 | 3461271  | 10523758 | 9567037  | 27867.59 | 1349880  |
| 1260982  | 1274459  | 316072.5 | 226092.7 | 899797.8 | 926896.8 | 1010384  | 3184469  | 127824.9 | 547462.9 |
| 636587.6 | 409210.6 | 60440.4  | 37230.41 | 150501.4 | 885609.9 | 808813   | 890982.6 | 92089.92 | 303771.4 |
| 380710   | 319714.7 | 0        | 0        | 0        | 138348.6 | 781167   | 627944.8 | 88832.51 | 403564.9 |
| 379717.3 | 248219.9 | 290666.8 | 306340.7 | 217053.4 | 264229.7 | 261260.5 | 507202.6 | 671797.8 | 468826.2 |
| 310765.4 | 229285.4 | 18207.21 | 24155.4  | 40438.59 | 364189.6 | 450167.3 | 364411.7 | 16863.64 | 131172.9 |
| 4468110  | 6045200  | 7988.037 | 0        | 204049.8 | 317219.8 | 7158362  | 14614854 | 0        | 1996208  |
| 480793.3 | 365892   | 19010.47 | 8275.471 | 25488.8  | 114863.8 | 1024733  | 275585.3 | 54920.95 | 524105   |
| 71403.88 | 65332.19 | 45346.96 | 60477.58 | 65575.9  | 1553129  | 119754.6 | 52370.14 | 30615.71 | 14155.86 |
| 29802167 | 40389281 | 201714.2 | 11769.86 | 263112.7 | 5407321  | 45987966 | 98210983 | 2119532  | 7979865  |
| 577208.6 | 495314.2 | 141096.8 | 130994   | 226847.3 | 4092525  | 2380191  | 1114249  | 81665.73 | 114853.2 |
| 2253560  | 2353927  | 645585.4 | 423883.3 | 811123   | 98658.49 | 3475447  | 1866133  | 74337.87 | 848081.2 |
| 328757.1 | 130231.5 | 268358.9 | 371217   | 334019.3 | 149051.5 | 178503   | 463989.7 | 186132.7 | 208271.4 |
| 4897304  | 2925071  | 734844.6 | 778110.9 | 1532844  | 6000412  | 6692576  | 4270495  | 1182086  | 3317747  |
| 198374.6 | 182004.1 | 0        | 17225.56 | 53389.8  | 240326.4 | 222022.5 | 164182.4 | 29436.26 | 61975.76 |
| 30824460 | 50550879 | 21979    | 8738.083 | 276677.6 | 1036224  | 36495498 | 1.2E+08  | 4788.588 | 10647545 |
| 1394434  | 815204.2 | 29396.14 | 5989.381 | 105205.2 | 216477.9 | 3182088  | 2358129  | 213351   | 1203400  |
| 565443.4 | 855080.1 | 45042.75 | 37714.55 | 122315.2 | 530167.8 | 150851.2 | 284479.9 | 100037   | 102902.5 |
| 4.45E+08 | 4.1E+08  | 99778435 | 49070811 | 1.71E+08 | 63118600 | 7.65E+08 | 1.03E+09 | 8229067  | 2.21E+08 |
| 715091.9 | 641442.8 | 195755.3 | 218572.6 | 246001   | 883314.5 | 509252.7 | 493550.1 | 194015.9 | 208525.9 |
| 46173446 | 63356597 | 6318345  | 3585219  | 7480425  | 8792734  | 57820608 | 1.48E+08 | 92468.07 | 69432682 |
| 213650.7 | 107451.3 | 75220.84 | 100443.6 | 236538.7 | 240030   | 136594.1 | 212413.3 | 41611.34 | 330805.3 |
| 32746510 | 38181557 | 1017603  | 751928.9 | 13624561 | 3593660  | 51173093 | 86064759 | 0        | 6400745  |
| 18447661 | 24518406 | 235283.5 | 98172.62 | 1061312  | 1223116  | 30044239 | 57436710 | 39626.16 | 5283324  |
| 1561893  | 2425060  | 383853.9 | 431426.9 | 301827.3 | 630843.4 | 642067.7 | 499137.7 | 463327.7 | 5898764  |
| 791675.5 | 841478.9 | 20760.23 | 8233.907 | 41440.62 | 73496.83 | 1542313  | 2119213  | 237357.9 | 499578.3 |
| 3494539  | 2007021  | 207868.9 | 173757.2 | 187563   | 1062441  | 7675948  | 4579504  | 597944   | 2390417  |
| 897940.4 | 1137311  | 167023.5 | 78421.77 | 192667.8 | 822253.6 | 633704.6 | 395489.9 | 205647.5 | 289368.5 |
| 210500.8 | 140154.2 | 0        | 0        | 6215.93  | 15277.31 | 486283.6 | 267601.3 | 40191.76 | 220166.7 |
| 334746   | 189718.3 | 0        | 5133.208 | 9089.72  | 435148.6 | 534875.1 | 354463.7 | 40050.87 | 345281.3 |
| 91026.32 | 17291.16 | 52333.97 | 102186.3 | 77296.82 | 85688.04 | 84952.26 | 119196.2 | 92824.91 | 89192.97 |
| 11373838 | 18379627 | 535140.2 | 605595.3 | 4888861  | 198332.2 | 9185635  | 43697088 | 0        | 3895619  |
| 197645.8 | 83227.55 | 155694.8 | 186300.5 | 71884.47 | 888722.2 | 436938.2 | 190793.3 | 108714.2 | 163712.6 |
| 287443.5 | 226618   | 150111   | 206259.2 | 166682.6 | 280216.2 | 119005.8 | 289857.8 | 95401.81 | 77066.2  |
| 7458489  | 7921844  | 298050.8 | 316489.2 | 586654.4 | 3554375  | 12457511 | 20616794 | 1625311  | 2381378  |
| 7313897  | 11355779 | 24473.95 | 0        | 190290.5 | 1083032  | 9129934  | 27172286 | 0        | 2408383  |
| 4684344  | 5707702  | 12738.48 | 20712.35 | 91523.2  | 2079841  | 7320700  | 10054947 | 35634.85 | 1175630  |
| 15997468 | 22496278 | 1435709  | 655690.9 | 5462879  | 3474385  | 17604364 | 54910802 | 93532.13 | 3693101  |
| 1654955  | 986373.6 | 178780.6 | 119652.2 | 260189.9 | 3151048  | 1151218  | 2945524  | 703938.1 | 1147673  |
| 351730.4 | 424364.4 | 217578.5 | 744187.7 | 3154966  | 84921    | 464123.9 | 1097581  | 77521.43 | 237725.9 |
| 1617898  | 1296864  | 175383.8 | 66421.36 | 430236.8 | 2452006  | 1492915  | 2217128  | 110113   | 607421.7 |
| 220449.6 | 235083.2 | 3902.771 | 0        | 25871.87 | 305802.1 | 188778.4 | 585846.4 | 0        | 45713.94 |
| 153727   | 198153.8 | 4799.589 | 5732.4   | 0        | 141982.1 | 154947.6 | 503187.6 | 9923.985 | 90089.99 |
| 280063.6 | 182678.4 | 15042.12 | 4749.83  | 11667.43 | 56435.8  | 624132.5 | 438808.7 | 359765.1 | 416929.2 |
| 612836.4 | 170455.2 | 837597.8 | 2964427  | 325360.5 | 811968   | 516279   | 893688.6 | 518553.4 | 637984.7 |

|          |          |          |          |          |          |          |          |          |          |
|----------|----------|----------|----------|----------|----------|----------|----------|----------|----------|
| 4007866  | 2411010  | 81295.85 | 34353.37 | 395038.3 | 689629.1 | 9067874  | 6879877  | 597235.4 | 3270226  |
| 663638.7 | 427297.3 | 38481.13 | 13156.68 | 35633.58 | 209924.1 | 1440212  | 834574.1 | 76512.2  | 531273.4 |
| 310116   | 283733   | 4996.93  | 2557.574 | 49807.47 | 233818   | 508834.6 | 452649.1 | 0        | 11171.03 |
| 766129   | 929640.8 | 329539.5 | 266895.9 | 432764.9 | 526794.9 | 198664.7 | 251789.9 | 2362433  | 807921.1 |
| 818949.3 | 429817.3 | 19643.52 | 4168.576 | 108142.4 | 58627.32 | 1905651  | 1286399  | 234034.4 | 704779.7 |
| 650340   | 339770.2 | 76198.08 | 40270.34 | 220531.4 | 870663.3 | 897284.2 | 845701   | 130059.6 | 511877   |
| 718820.2 | 535165.1 | 1206908  | 325441.8 | 4504915  | 60639.02 | 1528544  | 1640747  | 659476.9 | 476009.3 |
| 114031.8 | 66533.68 | 15191.11 | 6077.199 | 11971.73 | 251469.2 | 19679.77 | 161765.2 | 34285.11 | 114059.8 |
| 14184087 | 25012487 | 0        | 0        | 0        | 362401.8 | 14116643 | 58606903 | 0        | 5259519  |
| 77318.16 | 57497.53 | 101635.7 | 27494.78 | 209681.6 | 251124.8 | 41430.69 | 19148.78 | 17116.01 | 84948.59 |
| 12308478 | 8358300  | 1356479  | 730097.6 | 4706312  | 3382299  | 24320325 | 17997405 | 3869679  | 7050151  |
| 155884   | 49213.64 | 144716.8 | 198049.4 | 245097.6 | 139100.9 | 189493.3 | 142497.7 | 158830   | 128305.2 |
| 124170.9 | 138952.2 | 99061.47 | 618739.5 | 337246.4 | 106350   | 44893.55 | 56653.71 | 67804.33 | 372393.4 |
| 270046.9 | 162242.2 | 0        | 16169.2  | 89604.04 | 309046.6 | 418196.3 | 208200   | 59249.17 | 309521.8 |
| 1865105  | 940493.1 | 563833.8 | 278888.4 | 975397.6 | 1023779  | 3297590  | 2727353  | 533997.6 | 1225802  |
| 2803805  | 2038713  | 172590   | 296645.1 | 3411075  | 745891.4 | 3766036  | 5080201  | 658205.2 | 683731   |
| 3469126  | 4210213  | 277246.3 | 396373.4 | 2868291  | 761278.4 | 3396425  | 10670275 | 32035.57 | 1992987  |
| 577052.2 | 322471.2 | 271053.3 | 287659.3 | 344858   | 296267.5 | 840020.7 | 839602.9 | 45321.82 | 598080.6 |
| 17438702 | 8601549  | 5920313  | 2854217  | 9600146  | 14558430 | 27371611 | 24140107 | 4880131  | 13114229 |
| 1471795  | 870690   | 179936.8 | 79823.18 | 320007.9 | 2123126  | 1889979  | 1023305  | 2549237  | 1580936  |
| 398515.4 | 105096.3 | 366577.9 | 566016.6 | 540746.4 | 378194.7 | 432399.1 | 535437.8 | 260147   | 427920.7 |
| 385068.2 | 285937.5 | 157574.8 | 56422.74 | 464028.9 | 2296590  | 1033740  | 504996   | 58638.49 | 96672.76 |
| 255162.1 | 163649.8 | 11106.17 | 9326.193 | 104369   | 254411   | 404457.5 | 338560.8 | 12723.5  | 218163.9 |
| 1202788  | 918724   | 66277.7  | 48337.97 | 772882.9 | 9970295  | 4763570  | 1900180  | 39689.79 | 481734.1 |
| 173568.7 | 142691.2 | 44517.08 | 28317.99 | 18372.47 | 79361.28 | 307764.7 | 340946.6 | 8960.822 | 40290.22 |
| 2720852  | 405732.7 | 2077458  | 2718659  | 2873617  | 2674295  | 2121496  | 2717455  | 2423048  | 2222781  |
| 1087708  | 1262110  | 45406.96 | 233672.3 | 570625.3 | 964573.6 | 769752.4 | 2187620  | 165811.6 | 166629.1 |
| 2412626  | 1549437  | 180704.9 | 237255.4 | 219340.5 | 604250.4 | 5201579  | 4977529  | 1149767  | 1296376  |
| 651734.5 | 667725.9 | 34869.93 | 41874.68 | 68407.14 | 1789571  | 64294942 | 1424396  | 20855.52 | 265292.4 |
| 355290.3 | 134505   | 145190.1 | 144867.2 | 178826   | 2687526  | 1062020  | 298616.8 | 222003.5 | 567876.6 |
| 6932685  | 6558674  | 1654102  | 3061612  | 4466536  | 5316510  | 5460670  | 4097271  | 6019457  | 2568809  |
| 44558144 | 55739958 | 1822178  | 1267344  | 20598871 | 491136   | 66129875 | 1.23E+08 | 0        | 10715568 |
| 798605.7 | 482004.8 | 219044.6 | 102822.9 | 496665.9 | 361341.2 | 1367138  | 1301259  | 273483.2 | 300433.4 |
| 17983754 | 33249282 | 155711.7 | 131715.4 | 285170.2 | 2948211  | 12618379 | 8720781  | 626463.3 | 2493280  |
| 7684170  | 10425765 | 37828.52 | 40551.86 | 367127.5 | 439777.7 | 12574966 | 24448914 | 9152.375 | 2146366  |
| 148198.8 | 110057.9 | 79967.27 | 26752    | 256954.6 | 1430008  | 238207   | 330337.5 | 45363.49 | 88839.3  |
| 340307.7 | 320817.7 | 0        | 6569.212 | 17266.8  | 268769.4 | 565163.7 | 728613.9 | 0        | 19727.64 |
| 288887.8 | 167119   | 168419.8 | 30705.62 | 237279.5 | 614990.9 | 9616998  | 326998.7 | 87717.34 | 147279.1 |
| 134132.9 | 60214.68 | 128395.9 | 55915.7  | 149661.3 | 293598   | 305169.4 | 197495   | 35770.11 | 132689.3 |
| 399849.5 | 453556.9 | 9249.124 | 0        | 41551    | 323007.9 | 541498.2 | 1133334  | 14423.14 | 55859.79 |
| 271687.4 | 178497.7 | 3239.485 | 5313.114 | 7674.577 | 321064.9 | 446175.2 | 431819.9 | 15458.69 | 184072.1 |
| 258586.6 | 347080.8 | 111385.1 | 14545.06 | 29654.79 | 68700.26 | 284497.4 | 870020.4 | 5736.076 | 142716.9 |
| 79215.05 | 37527.88 | 53002.97 | 66045.56 | 48997.85 | 226554.8 | 205931.9 | 108265.4 | 18707.06 | 68638.38 |
| 80677.94 | 61864.94 | 7585.383 | 23364.89 | 171701.5 | 2276593  | 95628.31 | 91531.12 | 0        | 56351.42 |
| 221456.4 | 355387.4 | 0        | 11662.34 | 9278.162 | 132770.1 | 162776.9 | 46870.64 | 0        | 17661.92 |
| 1764412  | 1321913  | 5595.668 | 6865.265 | 141377.1 | 1902822  | 2884350  | 2998898  | 370613.1 | 928253   |
| 460586.5 | 317269.8 | 75486.62 | 66342.21 | 29985.67 | 204913.5 | 912887.8 | 738538.3 | 36574.67 | 317391.6 |



|          |          |          |          |          |          |          |          |          |          |
|----------|----------|----------|----------|----------|----------|----------|----------|----------|----------|
| 278512.3 | 222742.3 | 207714.9 | 436293.2 | 170974.3 | 590565.5 | 618908.9 | 369577.4 | 92307.48 | 235048.9 |
| 72524.92 | 27031.65 | 68551.97 | 87751.77 | 33863.83 | 333483.2 | 103982.7 | 112114.1 | 42789.59 | 53562.78 |
| 9272922  | 6131457  | 318394.2 | 65746.2  | 1067852  | 2323108  | 20379852 | 16068573 | 1904187  | 4128040  |
| 2296558  | 2833751  | 69217.75 | 346958.4 | 310031.4 | 1939157  | 2355850  | 1268624  | 249201.5 | 773348.1 |
| 920996.2 | 72288.85 | 723476.6 | 897900   | 1085215  | 831237.2 | 708847.7 | 925534.6 | 834996.2 | 861775.3 |
| 5847157  | 866883.7 | 3708847  | 4572505  | 4388790  | 7024618  | 6155590  | 6290294  | 4977624  | 5681109  |
| 6811085  | 8643844  | 0        | 0        | 0        | 697792.4 | 12121327 | 21448456 | 0        | 2588275  |
| 270191.9 | 370583.3 | 24537.62 | 44457.04 | 55560.6  | 196497.2 | 205733.5 | 76690.35 | 42782.03 | 93913.09 |
| 1550351  | 1577759  | 184697.6 | 17369.49 | 344056.9 | 2245595  | 1134178  | 3519914  | 0        | 110737.4 |
| 2290731  | 1532538  | 56698.54 | 57035.73 | 886925.8 | 340868.9 | 4826590  | 3911101  | 221560.4 | 1232899  |
| 174701.6 | 120541.4 | 19936.17 | 39748.96 | 92585.9  | 56590.33 | 313651   | 104788.1 | 29276.99 | 148788.7 |
| 434848.5 | 337901   | 0        | 0        | 3626.293 | 9785.576 | 1000808  | 961720.7 | 59323.53 | 297948.6 |
| 540732.8 | 357617.1 | 103296.6 | 112734.3 | 114665.3 | 217582.5 | 1038293  | 629094.5 | 102763   | 312484.4 |
| 201246.5 | 311387.9 | 3135.791 | 19471.86 | 0        | 141648   | 149299.5 | 83469.4  | 3658.264 | 32502.07 |
| 151541.6 | 58172.98 | 3777.554 | 0        | 0        | 10184.13 | 370970.2 | 238274.4 | 165373.2 | 99218.49 |
| 70561297 | 98592809 | 123819.6 | 86695.72 | 1455574  | 5541274  | 1.13E+08 | 2.33E+08 | 0        | 17506178 |
| 1179524  | 282015.4 | 788701.5 | 987575.7 | 1003904  | 1395715  | 979146.8 | 1284329  | 929459.9 | 922022.6 |
| 2971681  | 3379591  | 0        | 3526.769 | 0        | 850042.5 | 5439203  | 7387376  | 94700.3  | 555648.7 |
| 183361.2 | 51930.48 | 22959.88 | 3529.898 | 34019.7  | 279583.7 | 262546.1 | 150100.8 | 206752.2 | 114894.2 |
| 1077429  | 963863.1 | 52471.05 | 3851.03  | 111664.3 | 1615386  | 1094706  | 2414644  | 43491.87 | 268028.1 |
| 150717   | 76995.45 | 150111.3 | 43913.61 | 186711.1 | 808426.1 | 234232.1 | 166537.5 | 78363.84 | 70313.25 |
| 1408273  | 274346.9 | 1400317  | 2060264  | 1853422  | 1950442  | 919692.1 | 1147229  | 1315056  | 1196585  |
| 229846.4 | 187022.5 | 50578.24 | 51688.2  | 104671.1 | 224918.4 | 271106.5 | 99238.95 | 16025.19 | 210709.2 |
| 55039.98 | 16665.1  | 102961   | 493528.8 | 37033.09 | 64680.51 | 12937.61 | 81289.06 | 61581.97 | 45153.57 |
| 30004475 | 23592467 | 421199.2 | 268407.9 | 1264047  | 30836772 | 49780935 | 38183356 | 4625836  | 37880350 |
| 4785036  | 9268498  | 187575.1 | 155450.7 | 1647647  | 347043.1 | 1329580  | 649223.5 | 208633.7 | 560679   |
| 94859.5  | 139344.3 | 66321.04 | 136066.3 | 460232.4 | 117245.5 | 128398.4 | 342516.3 | 16747.44 | 58781.74 |
| 125938.6 | 121480.5 | 0        | 2091.612 | 12287.72 | 60792.93 | 232023.8 | 178284   | 13514.11 | 146528.6 |
| 1.61E+08 | 2.31E+08 | 14290539 | 8657244  | 50409347 | 2594173  | 2.05E+08 | 5.55E+08 | 0        | 50235951 |
| 10302155 | 11360019 | 425740.6 | 262220.2 | 97281.81 | 3304244  | 18667484 | 28363632 | 761257.9 | 11477882 |
| 12035422 | 17681008 | 7371.44  | 0        | 0        | 0        | 18937828 | 42094469 | 0        | 4076699  |
| 8584878  | 13890741 | 202915.5 | 151081.7 | 400793.6 | 1961804  | 9255464  | 33133949 | 46723.03 | 5778459  |
| 370122.5 | 90875.8  | 806976.8 | 972647.9 | 312106.2 | 324999.7 | 197591.6 | 522097.6 | 321117.9 | 284492.9 |
| 4598020  | 2295979  | 1364382  | 769881.5 | 2578725  | 3796628  | 7337483  | 6786639  | 1342780  | 3479106  |
| 428678.8 | 444725.8 | 92482.19 | 6743.805 | 136448.8 | 155461.9 | 674749.3 | 1183155  | 79371.02 | 172094.5 |
| 5665929  | 2924909  | 628008.4 | 972165.5 | 2319586  | 11260737 | 2166751  | 3851329  | 6418607  | 6204680  |
| 2421495  | 2548579  | 384798   | 90693.15 | 1431762  | 1913187  | 2477876  | 6234668  | 208061.1 | 1137993  |
| 1699056  | 1553758  | 263644.2 | 92089.63 | 338804.1 | 913161.8 | 2890483  | 4197061  | 20511.89 | 966233.2 |
| 520753.4 | 832730.1 | 7050.058 | 2312.947 | 2573.585 | 8180.006 | 696537.5 | 50641.85 | 13352.45 | 561048.7 |
| 193710.1 | 137126.8 | 170438.5 | 200927.6 | 202487.1 | 2752805  | 155220.2 | 289307.9 | 151004.9 | 56608.64 |
| 4757913  | 6585742  | 61140.41 | 22648.94 | 382794.4 | 777037.4 | 7235333  | 15935106 | 0        | 222336.1 |
| 162427.6 | 105062   | 150426.3 | 178748.6 | 90220.62 | 596136.9 | 269756.5 | 248021.3 | 43641.61 | 94420.51 |
| 7297501  | 8667592  | 5758.413 | 0        | 0        | 416537.9 | 14023621 | 16123826 | 0        | 2572525  |
| 402476.3 | 545553.1 | 3188.328 | 9254.984 | 11838.03 | 25099.24 | 668811.5 | 334049.7 | 6713.667 | 36939.06 |
| 250289   | 181204.5 | 43541.01 | 36834.38 | 78059.02 | 94649.51 | 469495.4 | 448282.8 | 0        | 138918.7 |
| 262461.2 | 206313.8 | 4322.033 | 11016.1  | 44967.72 | 345537.1 | 345448.4 | 332515.2 | 12685.49 | 81944.25 |
| 2.67E+08 | 3.15E+08 | 2631776  | 2173618  | 28526181 | 97259063 | 4.43E+08 | 6.82E+08 | 1925762  | 5.27E+08 |

|          |          |          |          |          |          |          |          |          |          |
|----------|----------|----------|----------|----------|----------|----------|----------|----------|----------|
| 57292029 | 93995546 | 17504627 | 10731139 | 50523550 | 154315.2 | 397390   | 319054.2 | 68294836 | 2.17E+08 |
| 869526.1 | 742781.1 | 318394.7 | 462876.8 | 342131.9 | 852468   | 710448.7 | 705416.5 | 34592.89 | 358266.3 |
| 352427.2 | 304873.4 | 31423.13 | 55759.19 | 59636.15 | 302237.9 | 537776.8 | 330811   | 9338.77  | 176575   |
| 11991909 | 14617126 | 52437.8  | 32573.68 | 2846609  | 4463505  | 18173267 | 11590979 | 30683.25 | 2354049  |
| 2458436  | 1694814  | 186753   | 179230.4 | 770577.5 | 589770.8 | 5051361  | 4063928  | 825892.7 | 1449964  |
| 1619781  | 1633170  | 113491.1 | 47892.92 | 148583   | 676567.3 | 2916230  | 3677876  | 158764.7 | 647576.1 |
| 191343.3 | 55997.66 | 166648   | 175526.5 | 134383.2 | 500594   | 325064.2 | 216195.5 | 108892.3 | 187775.3 |
| 485223.9 | 396185.7 | 0        | 38995.72 | 237574.2 | 334648.8 | 778789.6 | 321211.7 | 0        | 946453.8 |
| 970678.2 | 946274.3 | 67988.64 | 39774.47 | 46158.78 | 196681.8 | 1928671  | 1787236  | 270502.9 | 259657.5 |
| 981315.4 | 298588.3 | 990468.5 | 1293988  | 1039151  | 1312505  | 980961.2 | 938144.4 | 853620.4 | 696684.4 |
| 252277   | 166126.9 | 42786.51 | 43154.24 | 80077.18 | 315608.3 | 326195.7 | 294377.2 | 43139.28 | 129199   |
| 387189.1 | 264537.8 | 159703.2 | 251751.7 | 218251.2 | 502175.2 | 181377.5 | 704595.2 | 105465.2 | 161770.8 |
| 34806010 | 42756282 | 1475043  | 2188884  | 17448061 | 723340.4 | 51919986 | 93143983 | 20499.27 | 9447194  |
| 2252220  | 1776315  | 492340   | 122558.6 | 587909.4 | 848291.5 | 4212557  | 5133526  | 871388   | 699934.5 |
| 255601.9 | 155354.8 | 131084.5 | 130246   | 92612.35 | 107107.4 | 402502   | 294623.5 | 38881.7  | 174583.7 |
| 169395.4 | 196447.4 | 35604.61 | 33904.06 | 203146.7 | 1671530  | 429736   | 19312.8  | 5438.328 | 84222.11 |
| 1644113  | 387391.5 | 1256510  | 1631468  | 2135859  | 2413106  | 2001414  | 1510669  | 1384071  | 1273892  |
| 1302661  | 777553.6 | 143714.4 | 187136.2 | 1014944  | 566331.6 | 2230883  | 2120419  | 192083.4 | 838937.1 |
| 830599.9 | 638451.6 | 28136.24 | 46354.83 | 61804.42 | 248268.1 | 1756125  | 1348004  | 423054.1 | 608158.2 |
| 664268.7 | 367356.2 | 90446.22 | 43427.45 | 256474.9 | 822326.4 | 957322.2 | 844899.6 | 157535.5 | 522816.4 |
| 778889.9 | 658313.9 | 38012.15 | 23857.98 | 87399.71 | 1132248  | 879356.2 | 911993.1 | 94923.4  | 173915.9 |
| 316425.9 | 191866   | 178222   | 197793.5 | 4429285  | 180100.3 | 632427.6 | 534695   | 129956.2 | 106474.3 |
| 1164662  | 1231929  | 91547.63 | 16572.26 | 625725.7 | 564352.1 | 1631780  | 857575.6 | 0        | 237762.6 |
| 494631.9 | 335740.9 | 6308.466 | 10761.2  | 18181.55 | 752413.8 | 650127   | 666859.4 | 31865.01 | 249555.3 |
| 23887736 | 35130822 | 3870456  | 2297959  | 12214331 | 246289.8 | 23245268 | 84494893 | 16273.38 | 9606133  |
| 739077.6 | 600310.7 | 57600.28 | 2273.846 | 77868.5  | 27327.43 | 1628861  | 1587000  | 342653.2 | 980980   |
| 1025313  | 428230.1 | 104582.4 | 43913.17 | 205362.6 | 1602882  | 1369308  | 727088.7 | 586989.6 | 848534.4 |
| 207442.1 | 87359.84 | 86619.33 | 35522.1  | 93697.65 | 2245868  | 616568.4 | 195782.7 | 75645.68 | 303660.3 |
| 617045.8 | 423055.9 | 99397.14 | 60087.68 | 389831.2 | 7765165  | 1908477  | 1062682  | 44506.37 | 323611.5 |
| 589303.5 | 202409.2 | 6853.664 | 6577.95  | 98645.98 | 874048.8 | 896101.6 | 895741.4 | 396827.5 | 676198.2 |
| 18844378 | 10338319 | 2622716  | 1072304  | 3326331  | 33954614 | 17444854 | 31980279 | 7541870  | 13975349 |
| 10777732 | 16444456 | 0        | 0        | 221208.2 | 243094.3 | 15930859 | 38869512 | 0        | 2637953  |
| 353654.3 | 247718.5 | 177092.2 | 263469.6 | 234924.2 | 1426764  | 930552.1 | 208732.1 | 142061.9 | 226368.2 |
| 2229499  | 1596330  | 194513.7 | 19867.87 | 595565.3 | 4154592  | 1433799  | 3266325  | 210964.5 | 995794.1 |
| 174911.5 | 227460.5 | 0        | 3261.313 | 18807.6  | 60273.43 | 264597.6 | 573014.5 | 5839.206 | 117483.5 |
| 235198.8 | 169726.4 | 42092.65 | 16229.63 | 83158.82 | 118386.9 | 429880.3 | 268901.7 | 36549.7  | 146651.2 |
| 2189523  | 804924.4 | 275700   | 335872.4 | 529339.6 | 3554045  | 2664858  | 3244964  | 2457212  | 1008468  |
| 1160240  | 1328529  | 29229.21 | 6857.695 | 42432.36 | 162767.7 | 2202686  | 3382526  | 195555.4 | 228162.6 |
| 12878503 | 12933973 | 2471950  | 1826269  | 6564874  | 2440906  | 20043751 | 32813685 | 0        | 3726114  |
| 1350167  | 1243601  | 3325.207 | 2808.934 | 0        | 1535153  | 1982933  | 1502336  | 249356   | 1404879  |
| 48291505 | 22886296 | 16603210 | 8406197  | 27483798 | 41393532 | 76113080 | 66388432 | 14700336 | 37242810 |
| 6610962  | 11162555 | 6919.932 | 12894.89 | 680303.7 | 139742.1 | 7557877  | 26367149 | 0        | 3678856  |
| 147782.1 | 95921.6  | 43532.1  | 49003.22 | 18510.34 | 244265.2 | 114388.9 | 243005.6 | 56105.05 | 63052.83 |
| 13244959 | 8511046  | 458081.9 | 330759.9 | 2155498  | 9564360  | 25698232 | 19806651 | 1651953  | 7076292  |
| 60403.09 | 46055.47 | 13407.67 | 17768.51 | 67278.68 | 232121.5 | 213753.4 | 85455.32 | 0        | 32203.64 |
| 363484.8 | 212265.3 | 220432.3 | 460687.6 | 62378.15 | 434483.8 | 52106.81 | 169188.9 | 512481.5 | 434990.3 |
| 4806914  | 4789291  | 75279.22 | 25556.27 | 158816.8 | 1885953  | 9232006  | 11082492 | 450143.1 | 1601795  |

|          |          |          |          |          |          |          |          |          |          |
|----------|----------|----------|----------|----------|----------|----------|----------|----------|----------|
| 129210.5 | 134678.5 | 168962.5 | 272258.4 | 197903.4 | 359956.9 | 21681.21 | 228809.3 | 4719.203 | 5445.094 |
| 296536   | 382245.9 | 233749.5 | 102260.2 | 129190.6 | 1236988  | 1224342  | 977511.5 | 94773.63 | 89929.3  |
| 8716365  | 10075742 | 3502.431 | 0        | 55370.22 | 1291330  | 16755321 | 22847765 | 140905.1 | 1454089  |
| 15354710 | 23431435 | 16071.81 | 17652.65 | 211798.5 | 505407.9 | 22788639 | 56270552 | 0        | 7165252  |
| 5082427  | 1146299  | 3600127  | 4790260  | 4671596  | 4274212  | 5358296  | 6768355  | 3958949  | 4101130  |
| 346028.4 | 282978   | 319615.1 | 414095.8 | 3691306  | 256675.2 | 318199.3 | 205743.8 | 77697.04 | 585997.1 |
| 30378621 | 51476585 | 96861.07 | 0        | 257681.8 | 780131.7 | 36849151 | 1.21E+08 | 0        | 10768641 |
| 2726308  | 3019336  | 192966   | 2241.282 | 219681.3 | 184000.4 | 5295837  | 7842191  | 967430.5 | 2540226  |
| 1427919  | 579794.7 | 544792.3 | 296742.4 | 1459985  | 1023520  | 1991369  | 1533473  | 457678.1 | 1492084  |
| 167499.8 | 119972.9 | 90219.18 | 17906.21 | 112175.2 | 75561.15 | 243424.6 | 58903.54 | 61776.76 | 126916.2 |
| 835531.1 | 610529.1 | 507102.6 | 346895.5 | 897134.4 | 7319747  | 1503042  | 1271885  | 129019.9 | 269065.1 |
| 548483.4 | 543681.3 | 91563.57 | 139058.3 | 114639   | 605629.7 | 546428.9 | 1516184  | 329720.6 | 218006   |
| 794071.6 | 364009.5 | 113246.1 | 87579.81 | 505720.6 | 948157.4 | 1109200  | 804076.4 | 652523.1 | 279194.5 |
| 405325.1 | 183126.6 | 35453.08 | 48705.17 | 64923.82 | 691121.7 | 464970.5 | 488253.6 | 321735.6 | 273970.5 |
| 1708881  | 743101.6 | 1058666  | 785413.9 | 3193623  | 1670594  | 12218942 | 1260201  | 782212.6 | 2748404  |
| 209577.6 | 70123.32 | 29024.2  | 22356.9  | 28882.28 | 327134.5 | 288211.3 | 318527.4 | 178282.9 | 183434.4 |
| 170106.4 | 174895.9 | 89528.31 | 174223.1 | 105853.1 | 809979.1 | 387584.1 | 190689.8 | 4985.038 | 52677.7  |
| 4820147  | 5904915  | 3874702  | 5757170  | 26014813 | 2374254  | 9173711  | 15081319 | 4435.04  | 3660530  |
| 641209.6 | 366002   | 167305.1 | 193806.5 | 412815.9 | 3145750  | 2328896  | 979467.9 | 123662.8 | 395826.9 |
| 13375368 | 28327226 | 39669.01 | 5121727  | 117681.1 | 141559.7 | 627952.3 | 200682.5 | 320384.7 | 608130.8 |
| 201299.2 | 77656.58 | 243703.5 | 198793.1 | 97844.01 | 327156.9 | 465248.5 | 329038.7 | 146214.7 | 132498   |
| 1658929  | 369252.5 | 1185271  | 1572953  | 1665813  | 1210045  | 1740877  | 2152701  | 1402876  | 1233458  |
| 451200.9 | 66675.68 | 237802.5 | 635000.9 | 384108.8 | 435627.4 | 142001.8 | 436398.2 | 391335.6 | 523935   |
| 530438.6 | 747197.8 | 259293.9 | 272839.3 | 256579.9 | 150400.8 | 107450.7 | 7640.524 | 1786480  | 652317.6 |
| 76049725 | 97554562 | 2275935  | 1820942  | 31248946 | 1524302  | 1.17E+08 | 2.19E+08 | 0        | 15881217 |
| 8827565  | 10195779 | 9747.562 | 9365.252 | 140730.2 | 1231279  | 17046261 | 23550410 | 79970.32 | 1588966  |
| 424730.8 | 279624.2 | 19735.77 | 2233.984 | 115129.1 | 352419.7 | 771204.4 | 494623.9 | 229931.7 | 123633.7 |
| 100389   | 64157.26 | 46582.37 | 96626.71 | 104889   | 329179.3 | 186843.2 | 92189.25 | 22784.58 | 57230.86 |
| 41086923 | 69404621 | 341352   | 206671.7 | 951454.7 | 1804951  | 49370314 | 1.64E+08 | 9976.881 | 13334092 |
| 446017   | 309609.8 | 191759.9 | 303663.1 | 241279   | 458247.8 | 351211   | 521826.8 | 133527.7 | 124033.7 |
| 554093.8 | 348970.3 | 29426.67 | 26096.83 | 83851.56 | 325983.3 | 1122829  | 814849.3 | 52453.12 | 432692.3 |
| 695552   | 546977.9 | 615302.5 | 615699.1 | 1983823  | 310000.6 | 1921504  | 1594115  | 182698.5 | 589396.9 |
| 136319.3 | 99711.67 | 15016.46 | 16539.69 | 58678.81 | 57224.86 | 251489.8 | 221874.2 | 8760.804 | 77790.76 |
| 2000889  | 2555321  | 873821.7 | 1170985  | 145568.2 | 1071436  | 1233109  | 667167.8 | 1210009  | 387059.9 |
| 1413405  | 1669020  | 1140115  | 1049067  | 336001   | 171520.9 | 736094.2 | 4345494  | 1203792  | 536691.5 |
| 65924373 | 1.08E+08 | 7196138  | 4134222  | 23869591 | 647755.5 | 60367757 | 2.56E+08 | 51663.32 | 23829116 |
| 15899820 | 20523260 | 738750   | 590138.2 | 8182590  | 381775   | 22765205 | 47817778 | 11984.45 | 3896916  |
| 6462908  | 4145541  | 1016069  | 1142264  | 2057950  | 7692968  | 8989326  | 5650398  | 1550834  | 4097403  |
| 16146483 | 9622058  | 599287.7 | 392249.3 | 2321426  | 17387045 | 28130916 | 23256486 | 2350045  | 9894111  |
| 298607.2 | 153099.1 | 195096   | 293989.9 | 254899.4 | 311835.9 | 65513.67 | 435339.7 | 139955.5 | 133398.3 |
| 1721753  | 1293127  | 370862   | 311387.3 | 1074454  | 2680820  | 907406.2 | 918317.8 | 248459.3 | 1400151  |
| 5208090  | 4556912  | 860764.3 | 348507.5 | 1227232  | 3865929  | 8321690  | 11752238 | 577025.8 | 1862994  |
| 1261160  | 768877.5 | 407730.2 | 234129   | 632562.4 | 495352.8 | 2260459  | 1856614  | 440441   | 471638.8 |
| 37484041 | 69901427 | 1390011  | 971567.3 | 23252366 | 6709354  | 5140734  | 11557467 | 376656.2 | 2794118  |
| 26408734 | 41866150 | 38058.43 | 167277   | 1479082  | 2071338  | 35360102 | 99566825 | 0        | 7675980  |
| 1519498  | 915684.5 | 190687.8 | 154409.4 | 467676.3 | 2213679  | 1862918  | 1947023  | 295843.9 | 799750.2 |
| 499900.4 | 470919.4 | 0        | 0        | 20948.49 | 527632.9 | 755582.5 | 748349.6 | 119662.5 | 398994   |

|          |          |          |          |          |          |          |          |          |          |
|----------|----------|----------|----------|----------|----------|----------|----------|----------|----------|
| 7560377  | 7618963  | 1537969  | 1577639  | 1537691  | 6505986  | 9282659  | 20939084 | 2632964  | 2924755  |
| 516673.2 | 298054.4 | 152178.6 | 87090.46 | 432722.9 | 1925839  | 2235837  | 990132.4 | 271582.1 | 552734.3 |
| 5338221  | 3581665  | 586281.3 | 360887.2 | 1985391  | 4850234  | 8775304  | 9577639  | 870648.2 | 2484855  |
| 87707.38 | 64697.69 | 0        | 0        | 4383.233 | 0        | 206546.2 | 91059.34 | 7434.292 | 165370.1 |
| 124998.3 | 81996.92 | 106646.3 | 119158.3 | 84018.55 | 268674.1 | 316995.3 | 142493.7 | 11170.46 | 79460.02 |
| 277267.3 | 102733.8 | 244427.5 | 289793.5 | 311242.4 | 453528.2 | 348892.5 | 114042.3 | 253435.7 | 357318.6 |
| 309221.6 | 575107   | 0        | 33180.63 | 145202.1 | 41867.57 | 97590.14 | 19969.31 | 53784.58 | 1337369  |
| 570279.8 | 567999.2 | 6934.555 | 0        | 31710.81 | 183418.7 | 1126190  | 1145455  | 112324.1 | 341888.7 |
| 2498361  | 1842370  | 306716.3 | 160195.5 | 1839897  | 1020967  | 4195691  | 2908777  | 990498.9 | 1060643  |
| 5665720  | 4007038  | 2809617  | 1739666  | 2591720  | 2321653  | 8845652  | 11057124 | 123029.8 | 7426272  |
| 1407909  | 1718548  | 5624.125 | 2698.442 | 4412.01  | 1259300  | 1823463  | 2870147  | 35153.75 | 355536.5 |
| 590410.8 | 723502.5 | 90591.14 | 44358.3  | 134392.5 | 160831.2 | 874425.1 | 1838050  | 86142.47 | 86743.85 |
| 172764.5 | 126093.9 | 57246.57 | 63054.42 | 73206.09 | 783829.4 | 709569.7 | 153359.9 | 38587.86 | 148959   |
| 6827957  | 2245762  | 4111849  | 4884391  | 4833132  | 7181329  | 7599666  | 6290608  | 4252145  | 9756462  |
| 436258.7 | 362717.1 | 34094.94 | 11656.82 | 153138.6 | 236697.2 | 781054.2 | 897399.8 | 125079.8 | 444312.7 |
| 258445.6 | 183779.7 | 93637.88 | 77900.25 | 47558.22 | 330690.4 | 286517.8 | 125969.3 | 72300.98 | 342577.9 |
| 437684.5 | 342564.5 | 0        | 0        | 36519.69 | 212982.6 | 902211.9 | 801660.9 | 30256.76 | 152141.8 |
| 830253.1 | 1221397  | 80268.77 | 520272   | 98974.61 | 549205.9 | 281500.8 | 401104   | 73112.39 | 294815.6 |
| 2573122  | 1488855  | 818376.9 | 431916.2 | 1327006  | 11854881 | 11008089 | 4194183  | 520179.6 | 1600720  |
| 206383.4 | 23875.14 | 205349   | 148722.1 | 160167.8 | 285114.6 | 35541.51 | 233743.2 | 230795.7 | 190407.4 |
| 2344787  | 1327641  | 167578.8 | 169178.9 | 181875.7 | 449651.2 | 5364186  | 3670848  | 433912   | 2059813  |
| 234219.4 | 164751.4 | 57661.08 | 42038.25 | 312107   | 1094635  | 648101   | 72265.96 | 66902.87 | 236103.4 |
| 1889343  | 2448008  | 217097.8 | 86075.16 | 930657.8 | 1558200  | 1350384  | 781910.2 | 314978.9 | 808534.5 |
| 134312.3 | 193369.4 | 365075.7 | 0        | 179918.1 | 85477.18 | 783329.7 | 474621.7 | 9195.78  | 67947.57 |
| 2523201  | 2099109  | 77249.47 | 84038.63 | 426009.3 | 3007329  | 3576873  | 2357015  | 120731.8 | 1099784  |
| 15474638 | 23642609 | 1844752  | 1189299  | 5584328  | 806107.2 | 16662663 | 56845319 | 76053.24 | 4390861  |
| 195987.1 | 115696.5 | 55488.89 | 30919.23 | 117415.2 | 119998.2 | 327111.6 | 156369.3 | 76684.85 | 209248.9 |
| 7022440  | 6231240  | 963305.2 | 189170.7 | 1471410  | 9399311  | 7827232  | 14382902 | 838392.4 | 467137.2 |
| 700340.9 | 472447.6 | 88169.16 | 83009.17 | 118794   | 833663.3 | 1046602  | 1022703  | 90737.19 | 372816.6 |
| 3010267  | 1640135  | 811265.4 | 385831.6 | 1295324  | 1345284  | 5740306  | 3496142  | 604121.7 | 2209228  |
| 30542699 | 27482963 | 10579337 | 6375026  | 10908747 | 8398568  | 49822883 | 75799546 | 1421253  | 28555427 |
| 171643.7 | 152505.3 | 17973.3  | 13600.15 | 61368.8  | 54377.75 | 314422.7 | 172019.7 | 15488.4  | 72543.32 |
| 129758.2 | 71123.39 | 3111.565 | 17599.84 | 0        | 22571.37 | 302598.5 | 174404.2 | 5334.231 | 141999.2 |
| 1372521  | 1273822  | 2375639  | 1310643  | 4802675  | 393508.9 | 2159378  | 3267060  | 0        | 1972477  |
| 6173521  | 7853905  | 614154.2 | 261015   | 4313089  | 774490.2 | 7482472  | 19780667 | 0        | 4207149  |
| 868939.6 | 583625.3 | 24606.61 | 51867.11 | 108058.3 | 191976.6 | 1934806  | 1089031  | 105413.8 | 822561   |
| 3.58E+08 | 3.08E+08 | 80223320 | 50111574 | 1.52E+08 | 64144254 | 6.46E+08 | 8.15E+08 | 13770894 | 2.02E+08 |
| 85399.95 | 65298.24 | 56291.06 | 58857.81 | 29607.36 | 352736.9 | 254313.6 | 53722.31 | 25390.58 | 36145.3  |
| 1520142  | 2181094  | 112598.9 | 131033.3 | 325448.7 | 268375.1 | 1969675  | 5351745  | 219353.1 | 451713.3 |
| 119440.8 | 102386.7 | 0        | 0        | 0        | 162267   | 163394.2 | 173184.5 | 19951.84 | 60017.53 |
| 270359.4 | 213088.2 | 86201.1  | 187653.2 | 292207.9 | 1827618  | 507568.4 | 212998.3 | 58823.6  | 156697.5 |
| 17437166 | 12274639 | 2442958  | 828824   | 4201775  | 12015509 | 32118005 | 18546618 | 2904567  | 11220597 |
| 4.7E+08  | 5.48E+08 | 5833611  | 3336366  | 56330833 | 1.74E+08 | 8.06E+08 | 1.21E+09 | 3472512  | 8.92E+08 |
| 252402.8 | 213587   | 54095.56 | 61253.11 | 40612.19 | 252649.8 | 341056.5 | 178677.9 | 57958.12 | 69258.75 |
| 136554.4 | 55450.46 | 38330.44 | 53929.77 | 61343.8  | 199563   | 150123.4 | 169934.3 | 68915.28 | 149391.1 |
| 205048.1 | 140518.3 | 43939.16 | 53250.73 | 80167.45 | 77350.16 | 374780   | 303037.7 | 15079.29 | 104041.8 |
| 2279797  | 1464928  | 213666.4 | 183359.3 | 540137.4 | 3263432  | 2954300  | 3448906  | 413230   | 1057700  |

|          |          |          |          |          |          |          |          |          |          |
|----------|----------|----------|----------|----------|----------|----------|----------|----------|----------|
| 196257.5 | 171572.8 | 98038.04 | 66871.47 | 93287.3  | 770415.5 | 825875.7 | 115754.1 | 178615.4 | 495579.4 |
| 123260   | 109824.3 | 14377.07 | 16258.95 | 91846.23 | 290502.6 | 2264126  | 168081.8 | 16076.92 | 33594.51 |
| 235769.4 | 86113.85 | 202396.1 | 308462.3 | 47216.63 | 854796.5 | 426193   | 181612.6 | 253174.3 | 267740.6 |
| 248966.5 | 410089.9 | 3435.23  | 0        | 4429.618 | 201409.2 | 156609.4 | 31709    | 5264.795 | 25395.62 |
| 388111.3 | 140113.5 | 191779.1 | 118569.8 | 351730.4 | 3258823  | 812923.7 | 481251.2 | 204369.1 | 298902.4 |
| 107057.4 | 92927.23 | 27071.93 | 94747.7  | 139182.7 | 1733813  | 98974.06 | 102537.8 | 10124.49 | 73622.72 |
| 81398.73 | 57727.79 | 47886.44 | 61992.58 | 78616.86 | 246334   | 180639.9 | 131299.3 | 25261.53 | 31784.25 |
| 179159.4 | 189170.4 | 54361.65 | 43858.66 | 74520.84 | 202072.1 | 109276.9 | 34494.39 | 153381.7 | 501322.7 |
| 243608.2 | 176413.2 | 21823.7  | 74794.99 | 99788.93 | 346474.1 | 234515.2 | 536907.2 | 84423.04 | 140530.2 |
| 193514.6 | 222998.1 | 19356.76 | 18650.97 | 6779.052 | 773494.2 | 2066670  | 318591.8 | 10581.34 | 68805.95 |
| 102899.3 | 80049.07 | 167763.5 | 79108.72 | 302995.7 | 101030.6 | 104854.6 | 197018.4 | 13130.68 | 43583.13 |
| 1342102  | 1254572  | 3100.289 | 2632.156 | 40321.88 | 1160518  | 2286196  | 2586311  | 162601.3 | 587940.3 |
| 172035.5 | 152351.2 | 11133.46 | 31105.6  | 87308.52 | 860489   | 828357.8 | 279786   | 20170.36 | 81193.41 |
| 393897.7 | 496316.8 | 656480.3 | 863257.4 | 729329.5 | 541238.4 | 284993.1 | 208155.9 | 257294.3 | 1273798  |
| 654024.4 | 415479.3 | 71842.02 | 29923.52 | 176611.8 | 972871.6 | 809645.9 | 854422.9 | 109280   | 311298.3 |
| 187618.9 | 215088.8 | 9194.657 | 0        | 19790.77 | 148642.7 | 12219389 | 409549.5 | 35048.02 | 49663.33 |
| 379855.3 | 58884.49 | 234562   | 342083.8 | 419556.5 | 406232.6 | 305336.5 | 355211.7 | 330819.5 | 336092.7 |
| 1.83E+08 | 2.72E+08 | 1371372  | 1135468  | 42994001 | 7759580  | 2.62E+08 | 6.56E+08 | 0        | 37280221 |
| 23264161 | 24718609 | 1724275  | 27089544 | 7139720  | 4628103  | 20610906 | 26553291 | 2503732  | 4384933  |
| 169307.1 | 45332.54 | 114956.1 | 88160.08 | 95822.69 | 171552.2 | 227671.2 | 188568.4 | 152307.3 | 123035.7 |
| 459679.3 | 535068   | 155427   | 211200.5 | 148767.2 | 310527.6 | 339472.3 | 1259457  | 79424.84 | 161068.4 |
| 3581673  | 4769885  | 1394404  | 115953.8 | 1131728  | 828394.2 | 4113642  | 11933360 | 0        | 2652773  |
| 885471   | 566539.5 | 67943.78 | 83099.82 | 384675.6 | 1322010  | 985698.3 | 953615.6 | 158788.9 | 590841   |
| 58060.42 | 38781.02 | 53227.12 | 42006.64 | 51984.76 | 212257.6 | 93755.39 | 85988.72 | 11345.26 | 20605.21 |
| 130541.3 | 86000.42 | 0        | 2753.015 | 0        | 659468.5 | 950436.9 | 172495.6 | 127716.7 | 48066.37 |
| 6366570  | 4097612  | 523354.2 | 400965.1 | 1511614  | 9376151  | 8101154  | 7692361  | 858318.5 | 3367791  |
| 1339098  | 1042473  | 75039.11 | 86165.98 | 225451.6 | 1853016  | 1709374  | 1728936  | 200182.4 | 1057945  |
| 1661677  | 1628253  | 649940.1 | 282717.6 | 1713870  | 1313987  | 807848.9 | 4069183  | 242653.1 | 1017391  |
| 16878100 | 8569744  | 7403370  | 3021628  | 10855451 | 7380795  | 29201445 | 23589078 | 6956624  | 9053107  |
| 611457.2 | 503861.4 | 39039.09 | 48585.79 | 189877.8 | 166349.5 | 1211086  | 898837.7 | 0        | 161412.9 |
| 316326   | 227547.6 | 50211.02 | 72814.3  | 102296.6 | 395687.5 | 389738.7 | 363759.8 | 49335.31 | 111476.3 |
| 4545818  | 758439.3 | 3611115  | 4482868  | 4809149  | 4332631  | 3650556  | 4928150  | 3882000  | 3754955  |
| 665742.6 | 708597.1 | 0        | 3160.829 | 0        | 539623.4 | 1076626  | 862702.9 | 58964.68 | 632831.9 |
| 787166   | 108408.9 | 694070.5 | 820018.4 | 702559.8 | 809576.4 | 644911.5 | 911136.6 | 661485.1 | 685255.3 |
| 568467.4 | 684961.9 | 335681.7 | 369260.3 | 65174.29 | 447331.4 | 168927.5 | 1767966  | 484720.9 | 99736.56 |
| 2434681  | 4780513  | 14937.72 | 34577.5  | 942060.2 | 401842.7 | 745681.5 | 113307.5 | 29012.26 | 288434   |
| 876367.3 | 492520.3 | 32723.42 | 55752.57 | 273296.1 | 1286658  | 1169518  | 1312276  | 172599.9 | 549853.3 |
| 742751.4 | 1062379  | 444904.5 | 448128   | 419094.4 | 58983.44 | 97613.57 | 43504.41 | 2507610  | 983169.7 |
| 1128460  | 1103484  | 343952   | 210030.6 | 1321013  | 10455594 | 2454566  | 438893.5 | 106559.4 | 492474.4 |
| 1505045  | 1357622  | 184532.1 | 162262.1 | 186683.6 | 1814196  | 1907254  | 2301136  | 68964.87 | 1208331  |
| 7984805  | 9207672  | 238330.2 | 167878.1 | 321443.8 | 782591.8 | 15643933 | 22539574 | 673016.7 | 3590275  |
| 92521.32 | 26085.35 | 72036.84 | 52234.18 | 37961.24 | 58055.33 | 144134   | 116244.7 | 91676.57 | 93141.92 |
| 229305.4 | 179460.2 | 38570.68 | 102763.8 | 74417.12 | 324237.8 | 182526.2 | 116755.6 | 12099.39 | 214143.6 |
| 321872.4 | 308015.8 | 153138.3 | 138035.5 | 145323.6 | 442616   | 37609.8  | 169589   | 53111.26 | 127622.2 |
| 191981.6 | 188688.4 | 2270.728 | 2680.246 | 24886.49 | 48141.54 | 386596.5 | 151735.3 | 69117.11 | 147848.7 |
| 129165.8 | 59488.26 | 34113.45 | 149798.3 | 123901.8 | 83580.25 | 107829   | 219204.8 | 94978.27 | 104287.5 |
| 604423.6 | 533681.1 | 61822.33 | 221805.4 | 112651   | 879965.1 | 487650.3 | 284767.8 | 537833.1 | 1529804  |

|          |          |          |          |          |          |          |          |          |          |
|----------|----------|----------|----------|----------|----------|----------|----------|----------|----------|
| 199635.8 | 215824.5 | 9308.048 | 0        | 14473.94 | 151850.9 | 314404   | 573662.9 | 41631.48 | 190085.2 |
| 15066221 | 23945860 | 192775   | 147723.3 | 1833152  | 958759.7 | 20284738 | 57122150 | 4617.685 | 5403115  |
| 179158.5 | 84775.88 | 12236.37 | 16363.57 | 0        | 116864.5 | 383285.9 | 251775.6 | 33775.55 | 184096.1 |
| 251693.6 | 256793.7 | 0        | 3425.431 | 16413.93 | 15273.48 | 536027.3 | 190862.6 | 20137.63 | 304659.2 |
| 356586.6 | 200361.5 | 0        | 3466.786 | 4341.111 | 4189.507 | 883453.8 | 456421.1 | 14866.26 | 401861.9 |
| 705144.2 | 709952.3 | 8210.429 | 0        | 12195.28 | 534077.7 | 1214845  | 907055.4 | 79675.04 | 680974.3 |
| 813647.3 | 740051.6 | 197920.2 | 61463.02 | 334122.8 | 244201   | 1409947  | 725153.3 | 87956.78 | 110386.4 |
| 1169559  | 1070254  | 207902.1 | 95092.55 | 366389.4 | 377627.9 | 2115403  | 2959761  | 455653.5 | 276095.1 |
| 62598370 | 31742961 | 11806345 | 12457020 | 36085940 | 74852376 | 85436781 | 76602480 | 9038607  | 68152647 |
| 5081499  | 4567505  | 6515.744 | 10031.81 | 73304.23 | 5749421  | 7864401  | 7903711  | 804208.8 | 3664870  |
| 664589.4 | 517599.6 | 22196.1  | 22726.82 | 102818.1 | 1041244  | 749305.5 | 797450.9 | 62622.58 | 203183.2 |
| 408492.9 | 206168.4 | 0        | 0        | 24809.18 | 853884.1 | 319030.1 | 457591.7 | 85889.52 | 357767.7 |
| 1505333  | 1443555  | 5503.942 | 2120.879 | 0        | 1783562  | 2163194  | 2023879  | 246894   | 1155321  |
| 1571682  | 793070.7 | 194211   | 118664.9 | 452036.9 | 2142319  | 2295132  | 2149708  | 475462.9 | 1005157  |
| 42762552 | 26366535 | 5509796  | 2231678  | 10475312 | 44929552 | 71628610 | 41920833 | 8167291  | 28925157 |
| 4958379  | 5158602  | 53506.19 | 12115.19 | 731238.1 | 1598105  | 9485433  | 12825136 | 0        | 2714554  |
| 21285397 | 31334440 | 3598603  | 1761446  | 10989889 | 195260.7 | 23024283 | 75545808 | 2291.283 | 8908036  |
| 115357   | 70698.25 | 0        | 0        | 0        | 112707.7 | 222537.9 | 214555.7 | 19257.37 | 90118.98 |
| 987994   | 909812.1 | 52664.75 | 6919.154 | 62692.86 | 177640.6 | 2109426  | 1768970  | 250014.8 | 624455.4 |
| 876324.7 | 558241.2 | 446671.1 | 137620.8 | 1216888  | 725789.3 | 496569.5 | 1425577  | 696990   | 556454.6 |
| 5161800  | 4942716  | 16854.81 | 9761.782 | 143655.9 | 3548876  | 9453643  | 7585127  | 888162   | 4060753  |
| 2054293  | 1450375  | 3054.038 | 10473.13 | 34512.1  | 802184.8 | 4576614  | 2601475  | 420763.7 | 1641349  |
| 797431.7 | 684899   | 1132817  | 818356   | 1351623  | 3584105  | 70476.44 | 531758.4 | 706979.2 | 276560.2 |
| 252909.8 | 45022.5  | 198269.4 | 303297.6 | 249605.2 | 406933.2 | 284392.7 | 288450.9 | 212234.7 | 251440.3 |
| 586681.6 | 303578   | 152397   | 60576.77 | 396920.5 | 435925.4 | 970715.9 | 477708.3 | 261252.9 | 395013.9 |
| 427335.9 | 448606   | 0        | 9704.797 | 0        | 439425   | 623899.9 | 730351   | 52273.43 | 285474.3 |
| 2E+08    | 3.26E+08 | 418909.4 | 49171432 | 2.5E+08  | 218243.7 | 3046863  | 7.53E+08 | 534407.9 | 2.4E+08  |
| 89311647 | 1.18E+08 | 1604718  | 1689121  | 29217094 | 4007548  | 1.44E+08 | 2.75E+08 | 0        | 20095886 |
| 26780026 | 37938042 | 1035898  | 740861.7 | 13010114 | 523526   | 36048495 | 89802567 | 0        | 6428066  |
| 11783826 | 7785793  | 1762062  | 500261.1 | 4190446  | 5561165  | 23187396 | 14580691 | 2282264  | 6698940  |
| 31222816 | 40267867 | 392239   | 490090.4 | 15255713 | 511842.8 | 48856493 | 93362451 | 0        | 9542208  |
| 16603914 | 20649404 | 125422.2 | 360557   | 7987338  | 484437.3 | 26994263 | 47729384 | 0        | 3955389  |
| 529835.5 | 401143.3 | 20325.13 | 67991.18 | 22681.71 | 55629.67 | 1196590  | 930223.7 | 118477.9 | 161107.9 |
| 9443551  | 14970178 | 36571.46 | 6461.898 | 37491.86 | 683642.1 | 13874902 | 35629934 | 636990.4 | 2357874  |
| 11568972 | 22065931 | 2539046  | 2296116  | 4029969  | 1570779  | 1702017  | 3311858  | 825952.7 | 216842.2 |
| 258625.9 | 120326.8 | 0        | 2684.323 | 15236.43 | 8007.807 | 644482.8 | 410279.2 | 85203.83 | 248352.4 |
| 283203   | 200857.4 | 59089.15 | 22082.65 | 100729.6 | 111296.3 | 547200.7 | 598560.8 | 355829.3 | 112728.5 |
| 417229.5 | 211920.3 | 119595.8 | 96901.93 | 324183.5 | 238881.8 | 683788.4 | 652051.5 | 131573   | 270136.3 |
| 1.47E+08 | 1.36E+08 | 6122640  | 3309630  | 9865173  | 1.06E+08 | 2.62E+08 | 3.63E+08 | 1977473  | 72347287 |
| 58791953 | 58016373 | 11133976 | 2739064  | 26839904 | 15054737 | 99978343 | 1.35E+08 | 0        | 24815864 |
| 1947344  | 2805136  | 0        | 3939.578 | 0        | 89390.73 | 3334173  | 6902915  | 689568.5 | 972725.7 |
| 401915.8 | 268544.3 | 33248.8  | 46057.35 | 54351.91 | 230508.9 | 809909.9 | 359446.3 | 78246.96 | 341167.8 |
| 647696   | 787156.1 | 88198.71 | 68542.36 | 206097.8 | 257087.5 | 898145.1 | 2021790  | 59119.68 | 228049.3 |
| 773467.7 | 477841.8 | 166118.5 | 626370.4 | 1120778  | 0        | 677846.1 | 530834   | 48411.87 | 1001989  |
| 368427.7 | 256639.6 | 46014.78 | 5041.042 | 91270.64 | 88159.32 | 791949.3 | 637651.7 | 158233.7 | 79179.26 |
| 157649.6 | 202263.9 | 0        | 0        | 0        | 82905.9  | 249587.3 | 509350.6 | 24436    | 133515.1 |
| 333744   | 295098.9 | 14156.47 | 2557.107 | 2610.963 | 256270.9 | 615431.3 | 524406.7 | 10961.25 | 253949   |

|          |          |          |          |          |          |          |          |          |          |
|----------|----------|----------|----------|----------|----------|----------|----------|----------|----------|
| 272634.1 | 189239.2 | 11598.52 | 17909.92 | 10741.15 | 234825.7 | 517402.1 | 480725.5 | 109620.3 | 109032   |
| 1129469  | 1072220  | 363915   | 326412.4 | 664035.2 | 495941.4 | 1457359  | 2008477  | 169999.2 | 682265.7 |
| 5749385  | 7330827  | 116363.7 | 0        | 179780   | 1096898  | 10375700 | 17979116 | 240217.5 | 1439271  |
| 4263328  | 2688657  | 531694.8 | 162103.7 | 829123.1 | 8179693  | 3217047  | 6930640  | 761264.2 | 2075976  |
| 1319290  | 701845.8 | 160313.5 | 51549.77 | 543220.7 | 1029233  | 2454376  | 1530576  | 262919.4 | 988465.7 |
| 422677.8 | 696269.5 | 50669.13 | 79796.98 | 41312.56 | 95012.3  | 392763.9 | 66720.81 | 36931.26 | 43865.34 |
| 7178127  | 4142846  | 994790.4 | 368990.9 | 1079470  | 13935044 | 5655611  | 12931719 | 2853472  | 4937546  |
| 106277   | 81846.14 | 6189.252 | 0        | 11619.23 | 180865.4 | 109150.6 | 138580.2 | 38252.95 | 49633.17 |
| 369739.5 | 572129.4 | 19241.27 | 28073.01 | 29965.61 | 226573.7 | 343387.5 | 72917.18 | 119456.3 | 148360.5 |
| 4515920  | 2787826  | 158841.5 | 124238.9 | 640019.5 | 4749156  | 8082460  | 6739973  | 575617.6 | 2604064  |
| 901667.4 | 1171028  | 2523.009 | 5101.328 | 19688.49 | 35404.56 | 1705294  | 2917267  | 160634.5 | 683796.7 |
| 171339   | 111351.7 | 23493.61 | 12519.66 | 55544.49 | 158948.7 | 291016.3 | 117101   | 10913.6  | 221229.4 |
| 77112.36 | 63677.9  | 28110.31 | 21178.01 | 26690.01 | 86424.18 | 81435.5  | 56754.81 | 4045.583 | 40740.4  |
| 1256532  | 819802.6 | 89208.21 | 94074.94 | 131619.1 | 776870.8 | 2563929  | 1780689  | 122498.6 | 701764.5 |
| 107666.5 | 134661.6 | 0        | 0        | 4961.099 | 145249.4 | 89711.22 | 89122.46 | 0        | 0        |
| 581065.9 | 486150.7 | 98510.36 | 115116.1 | 154231.1 | 132834.2 | 1120301  | 1365683  | 48722.94 | 369614   |
| 1000146  | 993745   | 548465.1 | 955738.5 | 1874967  | 1046790  | 3702914  | 481837.7 | 46948.47 | 1400472  |
| 12812543 | 15479567 | 278724.2 | 17908.86 | 356307.1 | 2374861  | 24289614 | 37875917 | 467442.1 | 3516851  |
| 378848   | 452547.9 | 23116.67 | 58068.66 | 152846.2 | 363282.9 | 333349.8 | 1159072  | 39170.86 | 108806.6 |
| 65559.36 | 55527.4  | 6046.89  | 0        | 16906.04 | 115852.1 | 46677.13 | 31101.43 | 16268.84 | 28931.63 |
| 67459652 | 98938127 | 6814769  | 3788772  | 16888386 | 1048919  | 95327783 | 2.38E+08 | 0        | 22380102 |
| 453315.6 | 73807.64 | 328466.3 | 678214.5 | 524059.4 | 550839.7 | 474213.4 | 412647   | 404637.9 | 398431.2 |
| 4915703  | 2777414  | 955101.7 | 405668.2 | 1939246  | 5245818  | 7841859  | 7963402  | 1117920  | 3144431  |
| 235097.6 | 167019.8 | 190653   | 432047   | 163102.3 | 680652.1 | 241489.5 | 468992.2 | 74082.08 | 83777.01 |
| 6679347  | 9700165  | 41238.24 | 16588.03 | 220988.1 | 539109.7 | 11107577 | 23188279 | 4512.381 | 2046302  |
| 1234090  | 1534153  | 3321.627 | 0        | 40044.54 | 146997.3 | 2362509  | 1217950  | 5019.552 | 110643.6 |
| 101040.3 | 75858.91 | 17009.47 | 5062.034 | 163065   | 505988   | 252035.2 | 39322.92 | 32078.91 | 128337.9 |
| 357953   | 533601.5 | 26380.2  | 22459.97 | 198296.3 | 176370.4 | 260257.2 | 66391.34 | 33413.77 | 115873.2 |
| 620316.4 | 289943.7 | 54545.63 | 641237.5 | 451039.9 | 418258.9 | 767364.7 | 961872.8 | 237185.2 | 659141   |
| 2812778  | 3468073  | 144323.7 | 56960.41 | 261034.3 | 45748.82 | 5376241  | 8359308  | 0        | 1621773  |
| 457543.9 | 194778.5 | 1244368  | 1205342  | 72812.04 | 425866.3 | 449463.9 | 420854.6 | 336702.5 | 325650.2 |
| 3313929  | 5872158  | 0        | 10051.52 | 3937.616 | 80889.12 | 4106302  | 13748239 | 96124.59 | 946983.8 |
| 4503873  | 6502207  | 656493.8 | 149903.5 | 2539734  | 910173.1 | 4642054  | 16024836 | 196254.8 | 1882708  |
| 1065787  | 263754.4 | 723668.1 | 1037135  | 978913.3 | 838315.3 | 1142261  | 1481023  | 828929.5 | 845195.3 |
| 186864.4 | 108000   | 36804.43 | 26278.8  | 94938.02 | 713699.7 | 1012707  | 144066.7 | 25443.67 | 214697.5 |
| 9795762  | 11381836 | 581433.5 | 525384.7 | 7356102  | 158509   | 14730689 | 24214826 | 24690.51 | 2922087  |
| 1.95E+08 | 1.42E+08 | 25596002 | 19148202 | 73227899 | 57687310 | 3.91E+08 | 3.75E+08 | 69925923 | 63316861 |
| 341077.5 | 166866.4 | 96260.48 | 22332.85 | 160881.2 | 474626.3 | 438340.6 | 358874.7 | 170663.2 | 458834.4 |
| 2697118  | 1720111  | 225595.9 | 185855   | 722132   | 3804728  | 3660594  | 3139873  | 366438.9 | 1497327  |
| 579967   | 898459.3 | 28323.53 | 8364.523 | 46097.81 | 491261.1 | 450314.1 | 137244.4 | 41166.84 | 64163.92 |
| 15738097 | 9561563  | 164725.7 | 74207.69 | 5744656  | 15403991 | 27823020 | 27857844 | 2812018  | 12326390 |
| 2112581  | 1498580  | 371412.2 | 156236.7 | 366643.4 | 896923.9 | 4312834  | 2949573  | 696215.6 | 2542596  |
| 7032991  | 1147917  | 5476740  | 5808077  | 6003969  | 8114000  | 6753070  | 8178647  | 6313501  | 6388075  |
| 1650976  | 638244.3 | 3158048  | 4024532  | 1496695  | 1238810  | 1182389  | 2123453  | 1937737  | 2224749  |
| 224533.4 | 163630.4 | 41246.59 | 23712.51 | 92151.78 | 249925.5 | 311381   | 166415.4 | 34119.35 | 130645.4 |
| 125712.6 | 90054.44 | 36379.81 | 3566.249 | 73750.01 | 244472.7 | 11485.48 | 250063.4 | 27966.64 | 78589.54 |
| 3729502  | 3399941  | 5284.107 | 2705.318 | 31670.55 | 4180149  | 5886480  | 5571922  | 645469.2 | 3015962  |

|          |          |          |          |          |          |          |          |          |          |
|----------|----------|----------|----------|----------|----------|----------|----------|----------|----------|
| 1535617  | 779568.9 | 196374.6 | 121225.2 | 435085.2 | 2109726  | 2253909  | 2101979  | 457441.2 | 984196.4 |
| 173866.2 | 172750.4 | 6173.161 | 0        | 11803.95 | 18729.93 | 373770.4 | 396528.2 | 32275.87 | 96348.68 |
| 583597.7 | 383296.6 | 63823.96 | 60329.01 | 261044.2 | 194362.7 | 1170733  | 654851.6 | 294147.4 | 414363.2 |
| 1599496  | 1608023  | 1487234  | 908672.1 | 18340042 | 418858.4 | 2610316  | 3741836  | 18778.99 | 2814265  |
| 129775   | 47570.81 | 35392.75 | 22846.11 | 48792.78 | 62974.57 | 261992.9 | 118271.2 | 125115.9 | 65762.96 |
| 1429826  | 310496.3 | 1235321  | 1265973  | 1354561  | 1098863  | 1513278  | 1841617  | 1163729  | 1321583  |
| 272881.4 | 192858.9 | 31347.16 | 25902.19 | 32735.85 | 380782.3 | 372109.7 | 408678.5 | 30835.62 | 96066.76 |
| 902982.3 | 505742.9 | 530653.9 | 242198.9 | 2197499  | 2121154  | 1434108  | 746766.8 | 236882.2 | 788249.3 |
| 862721.4 | 614803   | 122015.1 | 39909.67 | 246176.7 | 359683   | 1743337  | 1092529  | 114281.7 | 452470.5 |
| 52437644 | 26658315 | 11475564 | 5667002  | 22175740 | 59090285 | 81905245 | 77521434 | 13919783 | 36909843 |
| 151343   | 121547.6 | 21468.27 | 32133.38 | 55545.03 | 132109.2 | 226942   | 296087.5 | 10243.64 | 47461.27 |
| 661995.9 | 426521.5 | 114377.7 | 94117.06 | 318665.5 | 620149.9 | 1039935  | 1001597  | 73941.13 | 445396.3 |
| 2537063  | 2933266  | 44278.02 | 72432.6  | 685214.8 | 1455143  | 3896833  | 7416887  | 8413.017 | 631145.5 |
| 1221858  | 1238824  | 843321   | 858862.8 | 723208.2 | 882282.7 | 251041.6 | 254732.9 | 2871321  | 2234451  |
| 419163.2 | 256365.7 | 37585.53 | 8288.535 | 115694.8 | 603155.7 | 576869.4 | 592762.5 | 44427.32 | 299517.7 |
| 541922.1 | 442355   | 0        | 3988.836 | 30589.44 | 357031.5 | 1083370  | 879686.7 | 99909.07 | 630788.6 |
| 17913324 | 10751265 | 2854315  | 629473.4 | 2433087  | 4737782  | 40157636 | 32183846 | 8664511  | 22748429 |
| 20364347 | 20212902 | 485748.7 | 219920.2 | 281619   | 15191194 | 36221865 | 49327424 | 3859057  | 7095906  |
| 6471597  | 7097439  | 4831.959 | 15378.92 | 0        | 401456.2 | 13877453 | 17415161 | 0        | 5101555  |
| 843985.8 | 673798.9 | 106702.6 | 65150.79 | 199581.8 | 1622028  | 428968   | 531447.3 | 113925.6 | 505724.9 |
| 507002.2 | 404903.7 | 263129   | 260351.2 | 220628.1 | 202473.3 | 698898.2 | 1109792  | 159207.3 | 271312.4 |
| 127115.6 | 78778.58 | 9263.555 | 36884.48 | 24112.33 | 73439.67 | 249526.8 | 181407.4 | 0        | 108202.9 |
| 12926238 | 17897413 | 29755.48 | 0        | 376992.5 | 684851.6 | 23381669 | 42190992 | 0        | 3899751  |
| 316046.2 | 151194.9 | 2988.843 | 0        | 5019.888 | 0        | 805111.9 | 581115.5 | 277464.3 | 200446.4 |
| 413484.8 | 392071   | 2293.723 | 3219.017 | 3239.259 | 619930   | 484067.1 | 918614.2 | 36614.57 | 226147.4 |
| 8900510  | 10139556 | 221570.1 | 378586.7 | 885408.5 | 1317739  | 17426695 | 23072065 | 176956.3 | 16075113 |
| 172034.2 | 100988.4 | 441646.2 | 515947   | 140245   | 80227.39 | 123958   | 244018   | 221746.3 | 266560.7 |
| 184489.1 | 154317   | 22243.43 | 3010.21  | 131484.7 | 897427.3 | 786217.4 | 357200.2 | 57948.39 | 109472.7 |
| 159413.2 | 159247.7 | 4500.829 | 0        | 4888.28  | 11491.2  | 350955.1 | 209569.2 | 32501.45 | 156013.9 |
| 692234.4 | 371122   | 167081.8 | 126223.9 | 381765.6 | 319183.8 | 1298787  | 791248.4 | 164305.9 | 469331.4 |
| 71875824 | 69851882 | 430532.3 | 79983.86 | 1050725  | 38565766 | 1.41E+08 | 1.82E+08 | 26138412 | 26386566 |
| 290811.7 | 228132.5 | 0        | 0        | 0        | 390325.2 | 444303.7 | 426006.9 | 0        | 217293.1 |
| 19463327 | 13128841 | 4768069  | 3013808  | 9734834  | 12659149 | 33031324 | 37634337 | 5467258  | 7998998  |
| 2117600  | 1164789  | 802804.5 | 909303.6 | 1588369  | 1319903  | 3107941  | 2502440  | 781573.9 | 2141879  |
| 4639435  | 4440329  | 5458.953 | 5087.216 | 30447.97 | 3754322  | 8341087  | 6679848  | 676288.3 | 4295027  |
| 73422.69 | 101274.9 | 31211.18 | 0        | 80536.53 | 640346   | 170523.2 | 239209.2 | 6881.574 | 0        |
| 1230976  | 2234625  | 21583.61 | 47730.73 | 276054.6 | 189620   | 1055030  | 5210667  | 156755.1 | 0        |
| 3776432  | 2471637  | 104416.7 | 71750.89 | 569094.3 | 2751501  | 7611795  | 5583827  | 449268.4 | 2009429  |
| 419320.5 | 315713.5 | 37978.9  | 11808.15 | 99950.92 | 234690.8 | 827298   | 448373.7 | 46494.88 | 270305.8 |
| 3861267  | 5762964  | 27463.28 | 31572.35 | 174723   | 380965.8 | 6235716  | 13823150 | 23832.3  | 1348887  |
| 2.12E+08 | 1.07E+08 | 46008157 | 23358833 | 88916708 | 2.47E+08 | 3.26E+08 | 3.1E+08  | 58276954 | 1.46E+08 |
| 419836.9 | 256262.6 | 18185.63 | 14963.88 | 84046.99 | 115120.4 | 949005.6 | 635934.3 | 389070.2 | 62447.81 |
| 13024761 | 12251408 | 12748.63 | 5450.851 | 144185.8 | 15310939 | 19723555 | 16097040 | 2025939  | 12357253 |
| 2258779  | 2309221  | 480900.3 | 1041495  | 2433786  | 650695.9 | 1845744  | 5884519  | 0        | 3049153  |
| 929851.2 | 577182.6 | 25133.62 | 13909.03 | 69945.09 | 117161   | 2233121  | 1447303  | 113846.5 | 850503.1 |
| 270354.5 | 200682.4 | 0        | 0        | 7488.686 | 82824.27 | 618271.1 | 190928.7 | 76445.64 | 254291.7 |
| 367730.7 | 258667.5 | 2797.127 | 18952.09 | 22375.77 | 89046.77 | 846241.6 | 643711.2 | 35922.08 | 187332.3 |



|          |          |          |          |          |          |          |          |          |          |
|----------|----------|----------|----------|----------|----------|----------|----------|----------|----------|
| 10291399 | 14680332 | 467042.3 | 450050.4 | 6976464  | 141625.1 | 12543705 | 35214332 | 0        | 3269108  |
| 119252.7 | 112081.4 | 17277.54 | 0        | 35102.28 | 183863.1 | 100181.2 | 95030.26 | 20892.31 | 55004.62 |
| 216455.3 | 123199.1 | 16466.88 | 0        | 19274.47 | 274176   | 366107.1 | 126091.4 | 46154.19 | 289908.5 |
| 327424   | 186314.3 | 70968.26 | 6875.83  | 114303.3 | 613433.2 | 246886.3 | 367751.5 | 63018.87 | 229001.4 |
| 24912.04 | 19847.34 | 3996.84  | 0        | 50979.24 | 128318   | 50193.38 | 33887.11 | 0        | 7284.665 |
| 8515877  | 4810073  | 1163264  | 493284.4 | 1438249  | 15968732 | 7824276  | 14975038 | 3411785  | 6373411  |
| 1367816  | 1310892  | 284137.2 | 115554.7 | 300917   | 726449.1 | 2342103  | 765848   | 372572.2 | 864716.3 |
| 2176202  | 1059717  | 1045850  | 989766.7 | 1340432  | 2682465  | 2307813  | 1918076  | 882925   | 1581566  |
| 424661.9 | 543101.4 | 301598   | 257782.8 | 1735845  | 655668.1 | 711883   | 1372257  | 28881.57 | 264014.8 |
| 1203210  | 724206.5 | 166271.4 | 185129.8 | 249175.2 | 1196118  | 2086779  | 1742985  | 150960   | 738633.4 |
| 508439.9 | 59222.16 | 147714.1 | 435015.4 | 444123.9 | 640610.5 | 500969.8 | 464064.9 | 440731.3 | 503214.5 |
| 101289.5 | 96584.4  | 38634.29 | 34190.85 | 84084.61 | 1887897  | 109449.2 | 59533.31 | 16224.8  | 37717.4  |
| 1.08E+08 | 97932105 | 32341419 | 16438146 | 46690309 | 7294264  | 1.99E+08 | 2.58E+08 | 4166440  | 57604342 |
| 2679549  | 1896237  | 221805.1 | 270820.4 | 940494.5 | 3910980  | 3171170  | 3768747  | 180853.9 | 1102354  |
| 1247244  | 1068926  | 239388.4 | 41062.2  | 352166.1 | 963294.4 | 2064316  | 2765334  | 112843   | 475660.4 |
| 325258.3 | 208988.6 | 3206.346 | 0        | 13039.77 | 435509.6 | 531605.9 | 399393.5 | 43253.9  | 222268.3 |
| 3179636  | 1036641  | 394428.2 | 190875.2 | 737611.8 | 5094205  | 4411141  | 2800481  | 1958728  | 2615420  |
| 23912041 | 16866397 | 5458458  | 3555728  | 12669785 | 15839835 | 39702886 | 45982848 | 4678686  | 9556534  |
| 449030.2 | 365439.8 | 43245.19 | 288012.5 | 334149.8 | 2734140  | 1130699  | 265362.3 | 130612.8 | 161571.2 |
| 2187620  | 780436   | 909652.6 | 735422.1 | 1871974  | 8209719  | 6140619  | 2074750  | 892097.9 | 2421255  |
| 447326.5 | 309990.1 | 173718   | 206723.8 | 616798.8 | 312453.8 | 236331.3 | 808346.6 | 415912.7 | 239497.6 |
| 278225.1 | 228855.2 | 5085.136 | 2665.195 | 30181.19 | 292417.4 | 468304   | 215973.7 | 26745.99 | 155691.3 |
| 8219910  | 11572343 | 35227.03 | 0        | 623283.8 | 5319289  | 10707476 | 28679494 | 98257.26 | 3605304  |
| 1289645  | 416989.4 | 742319.1 | 1058567  | 1047772  | 1399248  | 1265242  | 956777.2 | 1123323  | 1045889  |
| 409575.7 | 380492.3 | 86881.42 | 87721.87 | 91871.61 | 513628.2 | 427783.4 | 276332   | 44994.11 | 96576.27 |
| 2313869  | 1525804  | 417341.6 | 434289.3 | 1430095  | 1657596  | 3745429  | 4219350  | 819933.9 | 793457   |
| 128186.6 | 46148.07 | 2347.317 | 5451.158 | 8267.373 | 19002.48 | 318399.9 | 174139.6 | 56134.26 | 129523.5 |
| 823349.8 | 447853.9 | 140296.5 | 71266.06 | 374063.9 | 864832.7 | 1337532  | 1293046  | 189786.3 | 566654.1 |
| 9970805  | 13662464 | 47129.52 | 24192.56 | 288286.2 | 1036005  | 18045699 | 32659513 | 25006.51 | 2364178  |
| 257479.9 | 122960.8 | 263335.2 | 213221.2 | 3991416  | 129218.1 | 116871   | 439706.7 | 114569.4 | 190622.2 |
| 10215958 | 9403192  | 95407.07 | 195184.7 | 178778   | 4546338  | 21188720 | 23190106 | 401831.4 | 8213118  |
| 1061979  | 831170.3 | 63480.25 | 89708.17 | 118531.4 | 1472687  | 1440446  | 1360276  | 87792.87 | 633158.4 |
| 162345.3 | 143538.9 | 41242.73 | 68498.3  | 309411.5 | 1665364  | 130537.5 | 381290   | 5904.688 | 70099.75 |
| 192727.8 | 143012.4 | 55610.06 | 28494.96 | 63037.14 | 26041.77 | 389269.4 | 117728.2 | 51377.65 | 116931.8 |
| 292945.9 | 183302.6 | 57406.68 | 2822.917 | 47369.93 | 105020.1 | 638156.1 | 425772.1 | 106825.2 | 138486.3 |
| 141794.1 | 131149.9 | 143215.7 | 190494.3 | 116588.4 | 179143.2 | 415959   | 305000.1 | 9776.911 | 20168.84 |
| 10313949 | 12873298 | 14742.69 | 6075.389 | 113067.5 | 2708841  | 19333468 | 32257549 | 497983.1 | 1741185  |
| 299063.4 | 240621.2 | 15318.03 | 4988.438 | 3138.772 | 43436.96 | 693232.8 | 641398.4 | 24890.67 | 138953.4 |
| 413762   | 324630.9 | 8018.193 | 2731.548 | 0        | 91570.31 | 958714.8 | 594046.8 | 86560.08 | 570864.8 |
| 420848.9 | 206160   | 192157.1 | 68450.05 | 122683.3 | 651977.7 | 457424.8 | 699799.8 | 242103.3 | 195774.5 |
| 187409.2 | 127029   | 129960.5 | 124857.3 | 140215.5 | 668581.8 | 396250.5 | 164072.6 | 75770.56 | 97988.81 |
| 832372   | 657558.3 | 85241.44 | 81316.99 | 363549.8 | 565837.6 | 1432046  | 1229001  | 132392.3 | 501724.3 |
| 2067835  | 2911758  | 159663.3 | 406081   | 716619.6 | 1896833  | 1241417  | 823460.6 | 73625.21 | 1643693  |
| 5295072  | 4677782  | 134275.1 | 95777.47 | 1974991  | 2883136  | 9750296  | 5795692  | 254609.1 | 867716   |
| 4480258  | 764437.9 | 2846222  | 3498000  | 4092964  | 5270736  | 4425717  | 4790501  | 3562946  | 4259710  |
| 26467466 | 24366442 | 358090.6 | 277557.3 | 671290.9 | 18627642 | 50469502 | 87246.71 | 47247211 | 54307176 |
| 321140.9 | 171740.4 | 37482.96 | 10803.81 | 43460.9  | 713447.6 | 142425.4 | 513360.4 | 118233.1 | 245705.9 |

|          |          |          |          |          |          |          |          |          |          |
|----------|----------|----------|----------|----------|----------|----------|----------|----------|----------|
| 168770   | 69969.53 | 19613.7  | 4355.666 | 31204.17 | 369038   | 95360.03 | 194927.4 | 126029   | 126716.8 |
| 5355677  | 2122157  | 9884857  | 12812580 | 4785683  | 4185996  | 3861817  | 7120647  | 6244512  | 7116956  |
| 317615.9 | 262908.4 | 0        | 0        | 34333.66 | 116794.5 | 689042.1 | 520528.2 | 5121.801 | 101399.9 |
| 1582848  | 867078.2 | 427830.5 | 231580.4 | 1210980  | 5396643  | 7087124  | 2971681  | 900453.7 | 1639526  |
| 695177.2 | 1200270  | 432793.6 | 31784.55 | 89175.75 | 188986.2 | 324940.2 | 2836978  | 24017.94 | 242641.4 |
| 2001163  | 2416040  | 125923.1 | 27268.6  | 720503.8 | 1040709  | 2914513  | 6092412  | 116192.9 | 820914.1 |
| 9704834  | 9046988  | 38856.33 | 3031.744 | 190131.1 | 11717528 | 14619242 | 15658630 | 1648273  | 6992050  |
| 4396620  | 4174693  | 89322.32 | 93323.52 | 106453   | 3655497  | 7822476  | 8688126  | 540581.3 | 2054501  |
| 12253020 | 8461491  | 1680341  | 1093413  | 5412443  | 5616092  | 23717670 | 15234816 | 2153939  | 7946067  |
| 1326718  | 625456.8 | 547174.5 | 246692.4 | 677845.5 | 748884.7 | 2409461  | 1314024  | 755580.7 | 1030407  |
| 9529475  | 6822458  | 11004.59 | 3292.958 | 158432.8 | 3375640  | 21893942 | 11572131 | 1912873  | 7366161  |
| 11689983 | 9638466  | 57247.01 | 9782.969 | 538229.9 | 9492544  | 22441466 | 22266306 | 4032515  | 10431627 |
| 716176.5 | 436802.8 | 184556.9 | 82295.4  | 509157   | 2589159  | 3249495  | 1434359  | 375122.2 | 732492.2 |
| 3267304  | 3151596  | 362214.4 | 46836.67 | 853201.4 | 5192797  | 2650508  | 6232298  | 22050.6  | 144082.4 |
| 516744.6 | 548389.7 | 14150.53 | 11661.92 | 58821.9  | 799505.7 | 460462.5 | 1040079  | 40484.12 | 65481.31 |
| 645332.9 | 687068.4 | 48961.99 | 14028.96 | 0        | 84983.59 | 1364305  | 1813989  | 629771.8 | 470072.3 |
| 1912462  | 1443869  | 748789.8 | 2167469  | 2051556  | 7143165  | 2861590  | 1836113  | 473810.5 | 949523.7 |
| 124884.5 | 116110.2 | 8234.453 | 0        | 0        | 108061.7 | 221940.2 | 115646.4 | 5487.159 | 36019.01 |
| 428340.3 | 297476.5 | 101449.5 | 372092.3 | 716402.3 | 928938.1 | 900895.7 | 433714.7 | 203794.2 | 202497.9 |
| 405023.9 | 399240.7 | 241989.6 | 370054.1 | 238835.3 | 314459   | 43519.99 | 308565   | 131907.6 | 74215.43 |
| 2642121  | 4019287  | 3875.732 | 0        | 13426.97 | 1222458  | 3609775  | 9443374  | 4386.338 | 324277.5 |
| 7872938  | 7444543  | 485757.8 | 198820.9 | 734023.4 | 2763768  | 16160062 | 20171163 | 3455575  | 7624441  |
| 5831769  | 8571939  | 0        | 0        | 259157.4 | 268335.9 | 10120903 | 20363438 | 0        | 1854895  |
| 385494.5 | 346893.7 | 23087.35 | 31582.54 | 415684.8 | 264707.2 | 430091   | 896581.9 | 36760.99 | 105075.3 |
| 994404.3 | 459964.5 | 4711.487 | 6337.262 | 100514.4 | 1278884  | 1765731  | 1507317  | 309573.8 | 825247.3 |
| 1667746  | 928980.3 | 748413.3 | 705369.6 | 789498.9 | 7161925  | 5146905  | 1257610  | 785305.4 | 3211247  |
| 33095449 | 42263894 | 409087.4 | 318039.3 | 15075340 | 1552583  | 55638406 | 98679327 | 0        | 6349447  |
| 3002778  | 1709467  | 509283.9 | 308653.5 | 2308634  | 710608.7 | 5775322  | 3593175  | 898747.3 | 1755110  |
| 564981.1 | 699824.8 | 84933.21 | 106977.7 | 144780   | 575550.9 | 479299.7 | 224469   | 103459.6 | 121958.4 |
| 101929.3 | 41506.3  | 9709.375 | 6000.484 | 33293.53 | 75911.94 | 206624.6 | 138876.7 | 63478.29 | 52965.06 |
| 3672298  | 3683405  | 53192.75 | 179154.7 | 249733.2 | 464555.1 | 7939183  | 9954649  | 1944750  | 3137128  |
| 622454.4 | 850561.6 | 20584.2  | 16819.47 | 66682.91 | 543278   | 702269.4 | 300729.5 | 23507.41 | 102931   |
| 153215.2 | 97083.32 | 2372.5   | 0        | 0        | 5775.402 | 383930.8 | 217727.1 | 22176.92 | 161898.6 |
| 65025.37 | 31264.86 | 3117.334 | 0        | 38738.57 | 112982.5 | 63716.41 | 100246.4 | 33193.98 | 95833.94 |
| 2874519  | 2230473  | 204618.8 | 152617   | 628678.5 | 3937483  | 3864149  | 2850834  | 169663.2 | 2075051  |
| 1675866  | 1405154  | 0        | 30507.13 | 184127.5 | 1095456  | 3327161  | 4100624  | 586474.6 | 1288284  |
| 246657.7 | 161591.5 | 73079.99 | 73913.39 | 126675.3 | 254610   | 330232.6 | 155195.7 | 142854.7 | 101174.8 |
| 305004   | 294978.1 | 10583.83 | 11256.34 | 26392.61 | 483175.6 | 304308.9 | 429565.1 | 6520.185 | 24223.91 |
| 448887.7 | 352112.6 | 50910.68 | 97599.69 | 199404.6 | 4626801  | 1173804  | 775894.9 | 22615.86 | 141179.7 |
| 54475.81 | 51026.43 | 33136.72 | 4513.646 | 71528.36 | 431289.5 | 85127.98 | 86384.15 | 0        | 16079.81 |
| 510807.8 | 479900.6 | 6781.966 | 6044.018 | 24154.36 | 382999.6 | 949611.1 | 947204.7 | 175356.5 | 217901.3 |
| 18443848 | 23130516 | 475658.4 | 495931.4 | 2592913  | 6833239  | 31321672 | 53973492 | 258036.4 | 29848223 |
| 158329   | 109369.7 | 29739.26 | 32202.75 | 63331.5  | 485009.9 | 1179375  | 142369.6 | 69757.55 | 82013.73 |
| 786262.6 | 854248.9 | 907634.6 | 4368864  | 1966669  | 152464.4 | 247577.4 | 206974.8 | 1259806  | 2063402  |
| 364668.3 | 367857.6 | 415587.4 | 23595.23 | 25748.01 | 464349.8 | 82942.94 | 986701.1 | 28188.21 | 341579.2 |
| 16687932 | 21053302 | 580089.9 | 500482.5 | 8270631  | 393146.4 | 27826414 | 48299268 | 32744.26 | 4514970  |
| 170748.1 | 157022.9 | 43875.13 | 6629.409 | 107440.8 | 57711.97 | 279718.5 | 143538.5 | 11442.93 | 37439.01 |

|          |          |          |          |          |          |          |          |          |          |
|----------|----------|----------|----------|----------|----------|----------|----------|----------|----------|
| 266213.3 | 272081   | 0        | 20796.75 | 34703.57 | 398287   | 263676.3 | 701314.3 | 4747.044 | 88467.34 |
| 3168588  | 4265158  | 898730.4 | 822478.6 | 377877.8 | 1006906  | 4013962  | 10291203 | 33321.3  | 3935152  |
| 643218.7 | 633616.2 | 0        | 0        | 17365.12 | 355059   | 1273596  | 861163.9 | 171433.8 | 538479.4 |
| 7729166  | 8982568  | 189220.7 | 65720.23 | 84452.06 | 437288   | 16285567 | 17944477 | 4636.943 | 3129301  |
| 3612267  | 4354970  | 3262767  | 2332598  | 6667303  | 3603762  | 14710957 | 11087107 | 0        | 1318058  |
| 353173.9 | 277544   | 114332.6 | 76460.48 | 353518.9 | 1606880  | 983760.2 | 242792.4 | 40459.16 | 249277.9 |
| 1072593  | 714294.9 | 8832.995 | 9301.736 | 99067.89 | 180168.2 | 2565754  | 1620392  | 720363.7 | 919279.4 |
| 2165327  | 2808849  | 327408.2 | 473484.9 | 551192.4 | 2195308  | 1598898  | 875548.8 | 94142.65 | 1735737  |
| 87967.61 | 67354.46 | 39980.63 | 61839.36 | 28850.94 | 369195.4 | 262005.1 | 56792.47 | 9515.447 | 56400.23 |
| 1973644  | 1474110  | 660772.4 | 2005324  | 780077.5 | 1601696  | 1765795  | 4418321  | 676636.8 | 961805.3 |
| 6091103  | 4825251  | 203632.7 | 46922.05 | 491405.7 | 1159381  | 14035415 | 13268952 | 1269702  | 3315126  |
| 6127156  | 3420236  | 1152929  | 507866.9 | 2323785  | 6792914  | 9936006  | 9763780  | 1281938  | 4037412  |
| 8161979  | 11612243 | 50215.63 | 0        | 0        | 1108880  | 14547497 | 28523876 | 918550.6 | 3789384  |
| 1565446  | 389107.3 | 1258048  | 1038458  | 1174246  | 2070845  | 9449236  | 1225440  | 1405995  | 1353451  |
| 86920.5  | 51645.99 | 53672.91 | 10101.47 | 72354.54 | 324137.8 | 258529.3 | 109058.8 | 15211.97 | 65164.31 |
| 558563.4 | 370830.9 | 312994.8 | 322015.4 | 387712   | 1781987  | 1540481  | 844909   | 35001.35 | 298891.8 |
| 235928.8 | 353376.9 | 4962.565 | 0        | 86124.34 | 15111.07 | 341902.1 | 852219.1 | 0        | 8795.711 |
| 4.55E+09 | 6.43E+09 | 5.03E+09 | 4.4E+09  | 13341295 | 1193191  | 12518641 | 1.56E+10 | 47279037 | 14106368 |
| 1047207  | 534135.9 | 28765.94 | 7398.118 | 141462.4 | 170770.3 | 2553822  | 1632624  | 220472.4 | 967038.8 |
| 2648389  | 1641407  | 309566.6 | 187995.6 | 319395.3 | 1001437  | 5889906  | 4286313  | 0        | 3140132  |
| 894465.5 | 341276.1 | 353263.1 | 403406.3 | 374868.4 | 6050639  | 2151487  | 980315.1 | 335754.5 | 913872.5 |
| 5.29E+08 | 3.93E+08 | 71223214 | 53365499 | 2.04E+08 | 1.63E+08 | 1.07E+09 | 1.03E+09 | 1.75E+08 | 1.79E+08 |
| 249158.5 | 146267.5 | 0        | 7823.826 | 5667.505 | 0        | 632224.4 | 440648   | 126195.5 | 174028.4 |
| 385699.6 | 240836   | 48590.5  | 31266.7  | 39193.6  | 79573.02 | 890685.7 | 751404.8 | 246244.4 | 501381.3 |
| 1883828  | 713325.5 | 287668.6 | 150696.1 | 581661.8 | 3093112  | 2413928  | 2563448  | 975740.1 | 1713754  |
| 4735634  | 6193651  | 0        | 0        | 16131.14 | 703150.9 | 9122534  | 14633458 | 178350.5 | 334170.2 |
| 146088.8 | 118682.6 | 55168.52 | 486674.2 | 347642   | 175343.1 | 77276.53 | 77045.64 | 105917.6 | 357276.6 |
| 558804.4 | 364238.9 | 10912.82 | 10237.86 | 70031.55 | 570952.6 | 1043023  | 996040.4 | 232014.6 | 532921   |
| 80057038 | 1.03E+08 | 24721576 | 4858137  | 60874569 | 17211464 | 85277469 | 2.31E+08 | 276942.7 | 1.41E+08 |
| 1341516  | 160583.9 | 1167512  | 1528351  | 1397683  | 578692.9 | 1273186  | 1572831  | 1322289  | 1119798  |
| 27894697 | 46701462 | 223881.7 | 166257.3 | 1870529  | 2029790  | 39842155 | 1.1E+08  | 0        | 7975441  |
| 190569.8 | 144219.6 | 7450.141 | 10764.54 | 31026.07 | 389381.8 | 111770.6 | 156786.3 | 49557.79 | 67035.52 |
| 7816307  | 5380642  | 1248750  | 1146003  | 3669472  | 7833657  | 11959053 | 12545561 | 1209138  | 2868187  |
| 84812159 | 66012884 | 27208660 | 20078516 | 43285438 | 18114482 | 1.53E+08 | 1.71E+08 | 4106898  | 54806131 |
| 16368121 | 24163075 | 155992.3 | 34754.05 | 659180.3 | 1547466  | 28195573 | 57714717 | 4815.499 | 5637635  |
| 11067049 | 10194579 | 5675401  | 3822672  | 8630063  | 2029795  | 13914455 | 23967455 | 71858.87 | 19618108 |
| 223409.3 | 357308.6 | 3058.619 | 10043.47 | 108540.9 | 38847.18 | 241794.1 | 16195.89 | 39098.85 | 853438.9 |
| 10672033 | 13941185 | 10313.85 | 12863.03 | 94488.86 | 837134.5 | 21079870 | 32378594 | 175431.3 | 1175170  |
| 676973.7 | 536469.1 | 20004.02 | 10116.8  | 19238.02 | 454114   | 1392742  | 1289213  | 192964.7 | 508535.1 |
| 1056702  | 926225.2 | 2829133  | 39117.06 | 3404431  | 1350390  | 798384.2 | 2706772  | 730110   | 629544.8 |
| 339896.9 | 288338.2 | 2834.27  | 5402.126 | 0        | 53883.98 | 796326.7 | 599948.9 | 18758.31 | 105770.3 |
| 511651.3 | 513753.3 | 138826.6 | 145678.9 | 405000.4 | 463647.3 | 375868.2 | 1063002  | 108757.9 | 197313.5 |
| 1701100  | 1275204  | 94536.04 | 52179.74 | 338770   | 2710339  | 2023801  | 2122486  | 273107.9 | 504829.8 |
| 1111625  | 1297632  | 172073   | 213856.5 | 270162.1 | 1062612  | 1192821  | 632041.4 | 144612.7 | 374431.7 |
| 212109   | 133844.7 | 15985.82 | 2360.927 | 56893.8  | 296084.5 | 311641.1 | 311575.4 | 25039.74 | 118760.8 |
| 608459.1 | 423227.3 | 100922.2 | 70265.19 | 726844.6 | 3009236  | 1633585  | 719116.3 | 39038.01 | 355557.7 |
| 275121.9 | 240791.6 | 49950.26 | 72899.33 | 366389.9 | 997426   | 813008.5 | 560163.9 | 16368.49 | 83009.91 |

|          |          |          |          |          |          |          |          |          |          |
|----------|----------|----------|----------|----------|----------|----------|----------|----------|----------|
| 827986   | 646381.4 | 993103.4 | 1114732  | 477044.2 | 1149848  | 1951912  | 1587355  | 111835.7 | 731298.1 |
| 2720440  | 2494364  | 611608.7 | 55788.16 | 906636.7 | 3863296  | 2652747  | 4931884  | 0        | 108332.6 |
| 1257731  | 1204840  | 4659.13  | 0        | 17947.95 | 820147.2 | 2469564  | 1858279  | 277419.4 | 978366.8 |
| 521480   | 291963.5 | 78712.38 | 111494.2 | 453064.8 | 6166854  | 889381.6 | 718922   | 190778.1 | 234733.7 |
| 3047915  | 2617073  | 12053.35 | 0        | 175489.4 | 522532.6 | 7058096  | 5159480  | 369851.5 | 1563871  |
| 67950.12 | 71179.87 | 60603.42 | 59400.42 | 46798.34 | 7872.28  | 22046.57 | 0        | 177814.2 | 68689.43 |
| 3565012  | 1602798  | 175313.4 | 199697.7 | 639041.6 | 6058287  | 4705475  | 4256244  | 1559528  | 2144167  |
| 6866588  | 3576337  | 2577699  | 2467606  | 3976522  | 7090367  | 9507531  | 5235364  | 1853698  | 6967269  |
| 3178247  | 1546088  | 2411106  | 1306225  | 6352758  | 8765961  | 3479004  | 2094615  | 1542677  | 2758570  |
| 311572.1 | 61610.73 | 45586.19 | 16582.35 | 104859.5 | 450342.9 | 486325.5 | 217594.5 | 344806.2 | 300678.1 |
| 123231.7 | 65392.35 | 11567.69 | 9928.672 | 65123.35 | 90832.95 | 231563.7 | 157071.7 | 18162.1  | 100581.1 |
| 1480520  | 1533012  | 1065033  | 563585.1 | 992519.1 | 838870.9 | 948196.4 | 0        | 1425575  | 1405506  |
| 2.43E+08 | 2.44E+08 | 3578726  | 3129590  | 15026590 | 1.06E+08 | 4.93E+08 | 6.08E+08 | 3173111  | 1.38E+08 |
| 3561399  | 517442.5 | 2279429  | 3007988  | 3077572  | 4510121  | 3148984  | 4378641  | 3238512  | 3304997  |
| 186813.9 | 110752.4 | 70712.96 | 61719.24 | 250722.3 | 803106.4 | 360467.5 | 248619   | 0        | 199652.8 |
| 1468429  | 1584036  | 2753.779 | 3994.818 | 23965.94 | 222419.2 | 3194348  | 1967791  | 98433.57 | 408713.9 |
| 5493220  | 4455028  | 1003357  | 630246.5 | 3241319  | 1160026  | 10327183 | 11950208 | 534085.6 | 2307717  |
| 1885217  | 1509523  | 31335.15 | 15368.02 | 123440.3 | 7136353  | 15790040 | 3732570  | 418174.5 | 1387646  |
| 304242.9 | 289921.4 | 8213.007 | 20746.01 | 47162.99 | 40284.7  | 660597.2 | 368295.7 | 89863.77 | 182235.7 |
| 402090.8 | 298101.3 | 336186.6 | 113535.2 | 258704.5 | 509998.5 | 162992.2 | 28433.69 | 310858.7 | 262338.8 |
| 2461814  | 1504702  | 1082907  | 1127238  | 1339183  | 2288660  | 3197396  | 4903015  | 1617674  | 1093669  |
| 4.76E+09 | 4.89E+09 | 61402509 | 45149918 | 1.04E+08 | 2.48E+09 | 9.42E+09 | 1.23E+10 | 84639852 | 3.19E+09 |
| 11058423 | 12456613 | 908178.9 | 2239271  | 2174671  | 1550012  | 20575165 | 5486268  | 1090166  | 16386555 |
| 49868404 | 84636431 | 1300081  | 689966.3 | 2770839  | 1801360  | 71884601 | 1.99E+08 | 98571.07 | 2635605  |
| 1436300  | 310854.7 | 895926.2 | 1426993  | 1211137  | 1561797  | 1347284  | 1552387  | 1035035  | 1274041  |
| 8047242  | 8800901  | 4570951  | 2173761  | 5625649  | 2488537  | 7988842  | 23123683 | 0        | 5506179  |
| 1.83E+08 | 2.64E+08 | 29082153 | 15943936 | 31452927 | 40985243 | 2.62E+08 | 6.1E+08  | 534720.8 | 2.7E+08  |
| 2956262  | 2263896  | 319387.7 | 140740.3 | 632074.2 | 1758512  | 5888156  | 2920934  | 490709.7 | 1700544  |
| 727947.1 | 1179198  | 87413    | 7477.745 | 7765.837 | 122002.9 | 1038709  | 2834501  | 98161.75 | 235624.2 |
| 1145237  | 627355.8 | 230574.2 | 114716.5 | 426616.2 | 1283146  | 1866045  | 1832885  | 249043.8 | 802359.9 |
| 617584.8 | 666088.1 | 64317.89 | 40846.57 | 125621.8 | 96292.75 | 1219911  | 1730568  | 11055.99 | 214166.3 |
| 1115484  | 1139361  | 10257.04 | 4901.499 | 17782.48 | 1309647  | 1656692  | 1320675  | 104435.4 | 1066551  |
| 142440.3 | 104129.7 | 15468.34 | 5751.79  | 43363.52 | 40877.59 | 306615.4 | 270081.4 | 13161.74 | 100359.4 |
| 74576.62 | 57522.2  | 2788.011 | 0        | 21527.03 | 106666.7 | 99204.33 | 121380.9 | 5370.305 | 30876.44 |
| 10609922 | 12938561 | 186812.1 | 40687.73 | 8719.907 | 504836   | 22379930 | 28013567 | 9367.391 | 3181864  |
| 245292.3 | 155851.7 | 207949.9 | 227462   | 205456.1 | 496030.1 | 488833   | 493812.8 | 157781.3 | 113349   |
| 3069051  | 2482762  | 428956.9 | 54168.01 | 492977.6 | 2041675  | 5955183  | 4177497  | 291879.5 | 1027608  |
| 1317151  | 1007400  | 141991.6 | 108412.3 | 171977.5 | 1486302  | 2148460  | 2304351  | 461673.8 | 1030216  |
| 2513703  | 1737359  | 658099.3 | 631499.8 | 1750098  | 7353277  | 12807647 | 5023672  | 473821.7 | 1347261  |
| 104382.1 | 87279.5  | 105965.7 | 36014.19 | 196277.8 | 178000.1 | 215303.7 | 132520.1 | 33814.73 | 33249.23 |
| 15810608 | 20633671 | 2385836  | 1174995  | 1154655  | 4909870  | 26194204 | 50141037 | 71671.29 | 19761843 |
| 314842.9 | 283386.8 | 19058.87 | 61413.34 | 91802.82 | 4103561  | 711697.6 | 236841.1 | 59273.61 | 93912.24 |
| 1.03E+08 | 1.33E+08 | 2917074  | 2246666  | 35887844 | 8704432  | 1.81E+08 | 3.05E+08 | 0        | 16511436 |
| 7791105  | 11888701 | 1638640  | 280206.1 | 2439473  | 2473847  | 8751723  | 28867991 | 100758.3 | 3258021  |
| 1.98E+08 | 1.22E+08 | 61936337 | 29697764 | 98546416 | 95035294 | 3.72E+08 | 3.11E+08 | 63608748 | 79912685 |
| 693669.7 | 367767.8 | 187132.1 | 85375.11 | 536787.1 | 2308682  | 2946482  | 1260622  | 376390.6 | 697319.1 |
| 250218   | 266296.4 | 40332.65 | 0        | 71333.67 | 406493   | 158828.9 | 689491.5 | 52747.74 | 81914.04 |

|          |          |          |          |          |          |          |          |          |          |
|----------|----------|----------|----------|----------|----------|----------|----------|----------|----------|
| 1585468  | 1050407  | 687488.6 | 405897.1 | 1987764  | 4649800  | 4387171  | 2898664  | 274191.2 | 783093.3 |
| 2478189  | 1573533  | 250590.3 | 225123.2 | 649181.5 | 3948676  | 3037405  | 2997891  | 349612   | 1375981  |
| 1944064  | 1191363  | 401207   | 244476.6 | 983699.2 | 589941.8 | 3945303  | 3113693  | 648389.7 | 763049.6 |
| 255826.8 | 404995.5 | 7181.192 | 38543.7  | 27799.82 | 212629.3 | 202113.5 | 49144.74 | 11562.86 | 37075.81 |
| 1033595  | 861237.6 | 14098.77 | 0        | 64280.8  | 3785949  | 8875230  | 2095062  | 233183.3 | 713389.1 |
| 179319.9 | 103979.1 | 54407.29 | 57192.44 | 111248.9 | 254419.8 | 174857.8 | 221074.5 | 32598.15 | 133215.4 |
| 262400.6 | 168087.8 | 28797.09 | 134491.2 | 150318.6 | 1567212  | 686401   | 323627.1 | 64322.89 | 102404.9 |
| 3727179  | 4577790  | 1038636  | 674753.1 | 2521571  | 1485468  | 3936616  | 11573502 | 443176.4 | 501724.5 |
| 8.64E+08 | 5.32E+08 | 2.64E+08 | 1.29E+08 | 4.28E+08 | 4.15E+08 | 1.63E+09 | 1.35E+09 | 2.85E+08 | 3.46E+08 |
| 11899771 | 6948204  | 1613339  | 962778.2 | 4511531  | 16911920 | 16357014 | 13718189 | 2509619  | 8333150  |
| 2732558  | 2493840  | 16265.78 | 8306.541 | 54450.54 | 2607141  | 4933827  | 3855182  | 534184.1 | 2619945  |
| 6048213  | 3920221  | 633986   | 239814.4 | 1394704  | 6649342  | 10491701 | 5589878  | 901812.6 | 4292984  |
| 870871.3 | 1208877  | 0        | 0        | 831945.4 | 576090.5 | 571565.9 | 0        | 1896639  | 0        |
| 520234.2 | 514337.4 | 264243.5 | 286446.6 | 232762.6 | 166653   | 631809.6 | 407988.2 | 1389141  | 183307.6 |
| 2211730  | 1126741  | 710212.6 | 1010350  | 4765992  | 2897594  | 7016182  | 2843577  | 320544.5 | 2155318  |
| 928923.4 | 681434.8 | 125593.8 | 107826.6 | 166355.7 | 1183490  | 1378324  | 1107492  | 128989.2 | 606681.2 |
| 2268487  | 1285348  | 210119.3 | 114029.9 | 383876.9 | 3580522  | 3148476  | 3634365  | 712954.1 | 1458451  |
| 5012497  | 2962769  | 521597.4 | 250058.2 | 476996.2 | 592154.4 | 12182122 | 8468529  | 2815083  | 5688021  |
| 2062162  | 1111541  | 177790.2 | 139639.2 | 174661.5 | 1220426  | 4562433  | 2831614  | 410260.2 | 1746609  |
| 1013323  | 618374.1 | 142694   | 112917   | 350570.7 | 1546987  | 1262692  | 1372714  | 185944.2 | 523612   |
| 881901.1 | 575932.1 | 105194.5 | 26700.59 | 153513.6 | 1437979  | 1107083  | 1157717  | 120537   | 482761.9 |
| 1994205  | 2752151  | 2998.746 | 3262.143 | 30449.87 | 92434.28 | 3910781  | 6778882  | 295729.6 | 1362414  |
| 277730.7 | 313900.9 | 30258.04 | 0        | 128109.2 | 468479.2 | 4516474  | 238591.7 | 813090.1 | 43342.18 |
| 533970.5 | 566945.4 | 71282.54 | 79744.19 | 172380.1 | 477404.3 | 705501.7 | 1303799  | 113152.9 | 197878.6 |
| 356840   | 487417.1 | 351087.5 | 243440.9 | 5622.106 | 140682.5 | 94885.47 | 1210884  | 298176.2 | 54560.39 |
| 188909.4 | 170231   | 49867.38 | 27091.58 | 37286.13 | 54118.18 | 369819.7 | 319632   | 0        | 124101.4 |
| 1698574  | 1481861  | 0        | 2213.347 | 25024.32 | 908103   | 3651089  | 2761175  | 407667.2 | 1739221  |
| 3987580  | 1315269  | 2802840  | 1125640  | 3420209  | 5726982  | 3044102  | 2452114  | 5471958  | 2962130  |
| 7509871  | 11322312 | 1767207  | 690205.6 | 1385636  | 1944811  | 9560431  | 26414270 | 69422.74 | 9811445  |
| 92880.67 | 73517.06 | 2872.008 | 0        | 0        | 52532.21 | 202834.8 | 153810.3 | 0        | 72225.3  |
| 2803503  | 2242347  | 1506348  | 974368.5 | 1042172  | 697516.7 | 4736219  | 6614463  | 757889.6 | 1723516  |
| 352226.8 | 217357.7 | 79688.26 | 73781.09 | 79371.11 | 103284.6 | 754241.2 | 548020.4 | 24696.53 | 276070.6 |
| 5290461  | 1385683  | 3554942  | 4370803  | 4071828  | 6824457  | 4237765  | 5558781  | 4320595  | 4598410  |
| 3177832  | 3197096  | 16888.15 | 13857.53 | 131796.7 | 2490605  | 5854750  | 7155076  | 470693.4 | 1405858  |
| 13421909 | 17088609 | 319705.5 | 285005.6 | 5432128  | 1890444  | 23285436 | 35419780 | 9269.694 | 3140431  |
| 373962.1 | 262767.1 | 129827   | 53656.33 | 282579   | 2229593  | 943826.7 | 445023.9 | 23644.73 | 199344.8 |
| 1363849  | 650503.5 | 699488.8 | 506973.9 | 1304504  | 3732788  | 3847606  | 1436321  | 524746.7 | 958855.4 |
| 10673852 | 8651955  | 29411.6  | 0        | 477187.2 | 1411707  | 25736173 | 18258329 | 1137520  | 6383856  |
| 680999.1 | 639389.9 | 90719.26 | 34926.3  | 61017.53 | 902594.4 | 893849.4 | 684290.9 | 99637.08 | 137653.1 |
| 466489.2 | 254996.3 | 158972.3 | 226783.3 | 1034687  | 629523   | 1311069  | 694666.3 | 73965.61 | 460722   |
| 3092979  | 2661157  | 514084.6 | 640898.4 | 806780.9 | 2188184  | 5289878  | 2716654  | 327139.8 | 3614091  |
| 141693.9 | 103863.2 | 92109.26 | 399857.8 | 263719.6 | 148723.4 | 103783.3 | 61660.03 | 155336.3 | 313148.7 |
| 536985.1 | 293368.6 | 248301.6 | 344598.9 | 536460.7 | 2179241  | 934888.1 | 599444.7 | 145716.8 | 329273.2 |
| 4687883  | 4105776  | 1977699  | 1031696  | 3990806  | 86564.27 | 7301141  | 7895078  | 28878.13 | 1895369  |
| 1.85E+08 | 2.07E+08 | 1553883  | 1255810  | 6615951  | 1.11E+08 | 3.45E+08 | 2.8E+08  | 224475.3 | 88426842 |
| 740429.6 | 860762.7 | 13716.54 | 27491.6  | 7457.545 | 684963.4 | 1145176  | 1475485  | 24237.52 | 124303.1 |
| 142639.6 | 118130.7 | 0        | 2860.291 | 4174.467 | 240183.3 | 171386.6 | 304659.7 | 0        | 66435.61 |

|          |          |          |          |          |          |          |          |          |          |
|----------|----------|----------|----------|----------|----------|----------|----------|----------|----------|
| 3394164  | 2088659  | 650620.3 | 1143071  | 1554320  | 4903280  | 3734458  | 4518860  | 1132359  | 1280221  |
| 13258969 | 5863227  | 5585202  | 6778335  | 8522413  | 19307249 | 11686888 | 23217892 | 8276572  | 10894519 |
| 966779   | 786287.2 | 310664.4 | 283609.8 | 263045.2 | 908512.8 | 1381795  | 1728764  | 157338.2 | 592221.1 |
| 432829.7 | 415514.4 | 274874   | 53927.65 | 419696.6 | 2466456  | 887444.4 | 559407.6 | 89994.71 | 64803.67 |
| 622049.4 | 529319.7 | 126776.7 | 135672.2 | 557578.5 | 630217.3 | 586364.7 | 1192732  | 169549.9 | 318056   |
| 181266.5 | 83146    | 22160.67 | 15696.15 | 8769.304 | 100873.2 | 410780.2 | 218157.1 | 53104.76 | 156105.9 |
| 15512954 | 11563608 | 1301880  | 1667428  | 5727650  | 20910992 | 20616793 | 16530228 | 537166.2 | 7471947  |
| 46150.75 | 31842.3  | 27364.25 | 49538.15 | 40990.91 | 89778.48 | 105853.2 | 80384.85 | 10869.05 | 13502.13 |
| 542981.9 | 897123.8 | 6624.716 | 47643.18 | 399954.7 | 8933981  | 747937.1 | 249819   | 0        | 16494.06 |
| 14641970 | 22427329 | 17132.09 | 7494.304 | 447869.6 | 1271278  | 25679970 | 53294101 | 0        | 3666752  |
| 852808.6 | 576313.4 | 5458.573 | 0        | 10289.98 | 36272.76 | 2174133  | 1126431  | 132735.8 | 724262.9 |
| 2101097  | 720245.1 | 1319035  | 1424731  | 1877267  | 9374215  | 3012948  | 2777958  | 1169851  | 1554840  |
| 382457.1 | 213242.5 | 22965.93 | 17934.79 | 18130.13 | 713983.4 | 444626.8 | 475625.5 | 125458.2 | 332746.6 |
| 518450.9 | 318942.2 | 34057.6  | 72641.9  | 200099.4 | 779503.3 | 662789.8 | 762584.1 | 101904.3 | 246457.9 |
| 1309123  | 943494.9 | 283433.4 | 380449.2 | 1054590  | 9003358  | 2862783  | 1818433  | 198902.3 | 380005.6 |
| 5383825  | 8988285  | 22472.28 | 0        | 1551124  | 207913.3 | 7528367  | 21268621 | 0        | 2189174  |
| 331271.8 | 158852.2 | 187215.7 | 192672.6 | 246875.8 | 366199.5 | 338046.9 | 433412.3 | 75263.19 | 297781   |
| 320097.8 | 249405.5 | 3085.508 | 0        | 16343.56 | 84136.65 | 756867.2 | 448661.6 | 24580.64 | 181038   |
| 603386.4 | 320788.8 | 93516.2  | 31839.39 | 225705.5 | 814365   | 910448.8 | 853841.5 | 118474.3 | 432390   |
| 135815.5 | 187655.4 | 58564.5  | 54893.12 | 76462.16 | 84039.26 | 51562.61 | 464173.9 | 42976.61 | 25913.11 |
| 1375138  | 880962.9 | 166144.5 | 136981.5 | 270092.1 | 1881654  | 2067473  | 2359562  | 211490.6 | 789625.1 |
| 978130.6 | 1541872  | 199385.9 | 50472.96 | 285306.9 | 1071459  | 328276.3 | 365271.2 | 346015.1 | 173417.7 |
| 478389.4 | 389367.1 | 7067     | 0        | 59624.29 | 265825.6 | 1020223  | 812719.7 | 109282.9 | 224305.7 |
| 29592259 | 36050998 | 285822.6 | 116160.2 | 353872.3 | 10737077 | 57749639 | 91834344 | 5637097  | 10229093 |
| 922328.6 | 583737.6 | 6808.796 | 2767.31  | 60537.29 | 1180173  | 1627453  | 1382150  | 125443.7 | 496514.2 |
| 205017.5 | 250450.6 | 3626.923 | 2725.346 | 14091.61 | 545250   | 2609077  | 254253   | 17681.8  | 40666.31 |
| 5654788  | 4855080  | 2885343  | 1589997  | 5475965  | 39863492 | 9266770  | 7902214  | 457737   | 1803919  |
| 1488515  | 1017026  | 274210.7 | 125393.5 | 745688.9 | 624819.9 | 2942114  | 1925269  | 190032.5 | 694984.7 |
| 2517172  | 2747132  | 1000991  | 343157.4 | 2930093  | 120202.7 | 2663135  | 6777256  | 0        | 3464761  |
| 798449.3 | 185964.7 | 283821.1 | 364758.9 | 68815.89 | 272709.2 | 1720874  | 1083018  | 592819.1 | 683063.5 |
| 881654.7 | 621776.9 | 45348.48 | 20406.78 | 187648.9 | 1535543  | 984772.2 | 1788946  | 407376.1 | 890908.6 |
| 319439.3 | 257772.7 | 48472.54 | 32770.98 | 56731.58 | 529234.4 | 325158   | 307323.2 | 72958.78 | 142189.7 |
| 879982.2 | 701220.3 | 29199.62 | 11783.58 | 116063.8 | 689547.1 | 1741555  | 1457796  | 171095.2 | 587690.8 |
| 306723.4 | 252982.7 | 57711.73 | 86010.72 | 190570.8 | 2259803  | 724487.4 | 413144.4 | 19781.16 | 53849.34 |
| 211530.7 | 202727.1 | 0        | 0        | 0        | 747362.1 | 1880220  | 266559.5 | 0        | 110347.6 |
| 2240085  | 887086.3 | 10006010 | 1309836  | 527334.4 | 2076055  | 4579036  | 3168209  | 811177.1 | 2288725  |
| 1124449  | 896474.2 | 326569.6 | 157297.4 | 407269.7 | 506665.7 | 2097547  | 2396736  | 60760    | 568190.5 |
| 1200477  | 1242279  | 329036.4 | 227176.4 | 1449582  | 7414322  | 2430139  | 1527647  | 0        | 206405.7 |
| 326393.6 | 200586.1 | 26578.06 | 7019.062 | 91582.15 | 452388.2 | 497940.5 | 444659.2 | 43934.27 | 198133.8 |
| 353925.6 | 347516.2 | 205961   | 193743.5 | 165523.6 | 154470.1 | 385395.1 | 593393.2 | 40720.97 | 196037.3 |
| 18332577 | 14163385 | 98622.8  | 29839.76 | 931406.3 | 16396246 | 36353460 | 32875781 | 7232981  | 17666695 |
| 357020.6 | 337337.5 | 3103.214 | 2535.696 | 16707.82 | 198737.1 | 740957   | 479689.7 | 57172.67 | 347683.1 |
| 475305.7 | 364470.5 | 158042   | 197079.8 | 432650.9 | 6613919  | 306414.5 | 551334.2 | 328661.3 | 206188   |
| 178993.9 | 161872.6 | 289854.4 | 45200.82 | 551776.2 | 424964.9 | 70555.95 | 84625.71 | 48201.7  | 59620.29 |
| 83557053 | 74344388 | 44010620 | 30850944 | 1.88E+08 | 17382269 | 6.56E+08 | 27871020 | 720587.6 | 77261609 |
| 6259299  | 5075684  | 57162.64 | 33101.01 | 362472.7 | 5193828  | 12478638 | 11834648 | 2273372  | 5600952  |
| 14533019 | 16426624 | 2038661  | 2143251  | 10556830 | 4321877  | 20611179 | 41372888 | 29323.86 | 12614403 |

|          |          |          |          |          |          |          |          |          |          |
|----------|----------|----------|----------|----------|----------|----------|----------|----------|----------|
| 473051.5 | 196440.3 | 491939.6 | 658036.3 | 617081.2 | 394308.8 | 607805.3 | 743323.4 | 453869.7 | 552921   |
| 1123434  | 1076089  | 76183.04 | 34464.76 | 417590.3 | 14394432 | 2360410  | 1220744  | 5015.305 | 172543.7 |
| 3218644  | 3907462  | 14553.21 | 11095.97 | 51964.09 | 2680499  | 5182391  | 6203968  | 23418.51 | 862672   |
| 448828   | 345204.3 | 73657.34 | 4197.616 | 51372.63 | 148961.1 | 1000450  | 940092.3 | 153703.8 | 579633.7 |
| 199729.6 | 178619.7 | 44455.6  | 87401.68 | 234859.1 | 891243.5 | 441790.4 | 318518.2 | 20366.72 | 58752.47 |
| 4376879  | 4219276  | 267199.9 | 48341.83 | 560015.9 | 7268603  | 4320921  | 11018288 | 167931.4 | 1429312  |
| 878614.9 | 664378.4 | 71697.77 | 17817.39 | 168392.1 | 1481634  | 996989.2 | 1317499  | 64760.07 | 244788.9 |
| 11592362 | 5210540  | 2344449  | 918407.5 | 2389904  | 24203276 | 8310313  | 17373745 | 5105412  | 8286206  |
| 199404.5 | 111043.7 | 2794.394 | 0        | 0        | 0        | 525073.8 | 346416.4 | 61242.08 | 208380.5 |
| 680941.9 | 501961.4 | 43550.14 | 114604.1 | 177820.9 | 30992.31 | 1562917  | 1402491  | 218053.4 | 499379.9 |
| 1613892  | 1321034  | 2124.022 | 8455.328 | 11012.56 | 472265.7 | 3808499  | 1773716  | 222272.1 | 1206743  |
| 4035338  | 2297861  | 1752781  | 1367206  | 1577287  | 15961317 | 13443971 | 3836536  | 3157641  | 8038712  |
| 585455.5 | 451616.5 | 36864.12 | 6049.923 | 208646.9 | 1144044  | 384099.8 | 576791.8 | 19227.05 | 303114.3 |
| 30627531 | 20826819 | 396616.1 | 256575   | 2104074  | 28257924 | 61765184 | 37509593 | 5599731  | 20578414 |
| 1985504  | 1203672  | 186566.7 | 241339   | 787861.8 | 3084769  | 2448845  | 2027012  | 94809.25 | 2058160  |
| 261193.4 | 202486.6 | 12294.33 | 11971.36 | 27837.05 | 379217.7 | 375200.4 | 259687.7 | 34765.04 | 87941.9  |
| 65810711 | 50887000 | 409956.3 | 160667.2 | 3944585  | 60521664 | 1.29E+08 | 1.18E+08 | 25597480 | 64223402 |
| 1125780  | 1166262  | 2422.933 | 0        | 8607.442 | 1349061  | 1711249  | 1281639  | 157799.2 | 947369.3 |
| 5566472  | 4741671  | 2320682  | 447126.1 | 427494.3 | 1846883  | 11211781 | 4540158  | 115210.7 | 2558043  |
| 5847180  | 2199524  | 2435538  | 2992943  | 4045833  | 7293559  | 6922028  | 6210237  | 2926124  | 4349553  |
| 118191.8 | 72251.1  | 32585.62 | 2942.933 | 31726.55 | 237096.2 | 77023.97 | 227009.5 | 31104.18 | 84696.58 |
| 19291121 | 12496829 | 2132852  | 2618737  | 7714514  | 28397602 | 24448361 | 26791909 | 2484341  | 9302550  |
| 784396.7 | 593149.5 | 872695.8 | 263696.2 | 8176899  | 252927.4 | 776704   | 1614117  | 4147.484 | 998481.4 |
| 1121390  | 858001.8 | 60998.88 | 38302.06 | 191237.5 | 1284456  | 1901613  | 2119755  | 366786.7 | 914355.3 |
| 1767441  | 1241331  | 129052.9 | 177033.1 | 505416.5 | 2304006  | 2648552  | 2513489  | 93475.56 | 782024.1 |
| 665512.1 | 623419.2 | 83107.35 | 90328.71 | 144002   | 1284798  | 299116.3 | 1710389  | 60437.63 | 665183.1 |
| 6945516  | 3844829  | 1368656  | 555437.7 | 2793680  | 7915655  | 11414355 | 11105821 | 1580240  | 4560287  |
| 34604326 | 35662842 | 394615.5 | 73535.97 | 578246.9 | 9807603  | 76357522 | 92525391 | 8170642  | 14308659 |
| 2961079  | 2157277  | 197925.4 | 280958.7 | 917034.6 | 3975123  | 4235187  | 3217539  | 141462.9 | 1455545  |
| 322059   | 366982.9 | 67999.17 | 11707.04 | 187019.3 | 1738855  | 1140614  | 197205.6 | 65530.7  | 101038   |
| 1223690  | 644096   | 247728.3 | 110724.7 | 518749.5 | 1931590  | 1489580  | 614895.6 | 2074069  | 551048.3 |
| 3738624  | 2668614  | 6163228  | 1090052  | 7430117  | 1968275  | 10342973 | 6595566  | 0        | 4412845  |
| 800872.2 | 703655.4 | 43067.55 | 36297.77 | 93377.08 | 1114292  | 1112157  | 1247270  | 137077.1 | 565785.2 |
| 181036.5 | 181209.3 | 18112.77 | 41551.46 | 59247.72 | 156623   | 260059.6 | 105546.6 | 41311.58 | 63082.26 |
| 2282256  | 1640474  | 182140.8 | 27502.82 | 713834.6 | 4574336  | 1541843  | 3097729  | 209941.6 | 970679.1 |
| 82836.92 | 108612   | 3743.773 | 4273.841 | 20085.29 | 111857.8 | 61551.48 | 42173.48 | 0        | 22732.79 |
| 188635.3 | 83216.32 | 236693.2 | 241350.8 | 88561.89 | 303257.1 | 280876.9 | 310836.6 | 151285.1 | 159327.9 |
| 434745.7 | 340378.8 | 116025.5 | 164827.2 | 175480.7 | 505284.8 | 512751   | 428940.4 | 80225.55 | 139477.8 |
| 1766627  | 295153.4 | 1406158  | 1789456  | 1832729  | 1397991  | 1761059  | 2248633  | 1636146  | 1488513  |
| 330145   | 255429.1 | 33049.66 | 9372.947 | 78656.56 | 532432.2 | 385884.9 | 506044.7 | 31256.6  | 98151.72 |
| 777418.3 | 840075.8 | 97627.21 | 11513.53 | 3280889  | 267765   | 4082567  | 2037871  | 122977.4 | 239006.9 |
| 1628502  | 879269.6 | 683784.9 | 634565.3 | 720681.2 | 6864173  | 4766142  | 1265981  | 801957.2 | 3122201  |
| 135565.9 | 62693.34 | 25990.95 | 36532.92 | 21567.46 | 11690.42 | 319567.4 | 85353.01 | 119775   | 135907.6 |
| 1273806  | 720284.4 | 128716.7 | 73725.39 | 91926.17 | 2958553  | 563452.5 | 2148198  | 547126.4 | 751876.4 |
| 163522.5 | 119872.5 | 20538.67 | 0        | 350540.7 | 229287.4 | 957940.6 | 146120.1 | 24327.83 | 334648.3 |
| 27650392 | 24576005 | 514713.2 | 422298.4 | 7062343  | 16501612 | 54949702 | 31503107 | 119886.3 | 5376184  |
| 2955427  | 5716840  | 19378.15 | 0        | 0        | 584634.9 | 3415567  | 13138669 | 0        | 0        |

|          |          |          |          |          |          |          |          |          |          |
|----------|----------|----------|----------|----------|----------|----------|----------|----------|----------|
| 650564.5 | 953329   | 41259.61 | 15045.53 | 157850.8 | 889801.9 | 313076.3 | 344583.6 | 0        | 200165.1 |
| 2939541  | 4154791  | 0        | 0        | 0        | 554351   | 5595407  | 9405115  | 0        | 34080.02 |
| 308286.3 | 379021.3 | 256656.7 | 261129.3 | 232288   | 34666.55 | 37351.85 | 34135.01 | 884148.7 | 508925.1 |
| 2186476  | 2030109  | 73474.35 | 92943.25 | 234180.6 | 2276375  | 3681636  | 4193351  | 301793.3 | 839823   |
| 79766170 | 37801865 | 24408730 | 14397988 | 71904183 | 67645394 | 1.21E+08 | 1.12E+08 | 25529796 | 60518732 |
| 601220   | 385760   | 48719.49 | 19414.85 | 133264.2 | 1089878  | 652030.5 | 923726.3 | 74481.75 | 362104.4 |
| 879422.8 | 668875.6 | 2492.139 | 4248.929 | 12755.19 | 325320.4 | 2080501  | 1065807  | 148461.4 | 706966.6 |
| 983514.7 | 775339.9 | 349845.7 | 259108   | 901889.9 | 186573.8 | 1531575  | 2104441  | 112003.5 | 1343608  |
| 158556.9 | 64048.79 | 22861    | 21586.93 | 163704.4 | 19351.27 | 309481.8 | 260564.4 | 182995   | 123032.6 |
| 124335.7 | 88876.43 | 0        | 0        | 0        | 134629.2 | 240475.4 | 183783.4 | 0        | 72051.96 |
| 1934020  | 1204567  | 238087.4 | 210548.3 | 3306822  | 517154.8 | 2182040  | 2965362  | 747566   | 524957.1 |
| 76904281 | 1.04E+08 | 2771785  | 2130174  | 33563992 | 2121928  | 1.34E+08 | 2.43E+08 | 0        | 16441382 |
| 8948858  | 2786901  | 1326857  | 6451228  | 14728416 | 2364686  | 9046987  | 10818950 | 12431794 | 5391122  |
| 1317135  | 1136892  | 18938.68 | 2861.896 | 29538.76 | 271329.5 | 3145060  | 2539681  | 408749.4 | 1236339  |
| 200331.1 | 185052.3 | 79248.2  | 80545.9  | 164080.6 | 58743.96 | 257313.6 | 345212.5 | 25533.76 | 119557.1 |
| 970638.8 | 453707.8 | 463021.9 | 441784.1 | 656705.9 | 3254937  | 2575570  | 1103833  | 349261.1 | 658063.2 |
| 37993270 | 45717921 | 8088.698 | 13442.1  | 192793.4 | 7763016  | 80895584 | 1.07E+08 | 569608.9 | 6646597  |
| 684417.5 | 571472.8 | 111516.4 | 91573.38 | 105063.1 | 873734.1 | 971133.4 | 704787.9 | 72993.9  | 584675.6 |
| 1207542  | 1133560  | 50254.47 | 8928.544 | 148299.2 | 2139942  | 1134111  | 2954844  | 49141.09 | 385591.4 |
| 891653.3 | 773580.5 | 34401.18 | 12169.33 | 64781.28 | 352391.2 | 1993738  | 1663937  | 144293.7 | 819000.6 |
| 177096.2 | 109574.8 | 0        | 0        | 5270.349 | 0        | 465462.7 | 366682.2 | 170998.8 | 128778   |
| 48712787 | 69523921 | 6751863  | 4411420  | 8160900  | 40347797 | 52591337 | 1.66E+08 | 307395.9 | 15152991 |
| 716994.8 | 289745.6 | 205019.9 | 288029.9 | 268948.5 | 323261.8 | 1442302  | 1203604  | 441431.5 | 618440.4 |
| 188040.1 | 135424.2 | 31910.58 | 4876.183 | 10242.84 | 50419.5  | 440237.8 | 406688.6 | 181060   | 190118.9 |
| 219039   | 184440.4 | 411961   | 934532.1 | 236260.4 | 184680.7 | 25734.24 | 56016.4  | 319901.4 | 494883.5 |
| 1662787  | 232200.9 | 319528.5 | 358054.3 | 676117.3 | 1204891  | 3393222  | 1810962  | 1522843  | 1803405  |
| 4397605  | 9133363  | 78590.67 | 53606.82 | 2971807  | 391379.4 | 1726238  | 483292.4 | 0        | 194810.3 |
| 3.55E+09 | 3.15E+09 | 1.28E+08 | 75555006 | 1.37E+09 | 2.01E+09 | 6.87E+09 | 5.54E+09 | 16691330 | 8.2E+08  |
| 1161965  | 577533.1 | 209091.5 | 60510.91 | 293078.4 | 1130303  | 2231257  | 644716.9 | 713389   | 941705.5 |
| 5706090  | 717529.3 | 4197667  | 5151196  | 4997717  | 6998855  | 4983165  | 6376078  | 5678095  | 4501460  |
| 472828   | 398670.2 | 151952.7 | 242065   | 257685.8 | 210518.5 | 700640   | 593984.3 | 56964.79 | 172938.9 |
| 161434.4 | 134192.6 | 0        | 0        | 9750.42  | 234315.2 | 241111.2 | 119364.1 | 10247.75 | 73218.42 |
| 502858.2 | 395755.4 | 134097.7 | 61796.31 | 405121.7 | 4512929  | 872272.4 | 575341.8 | 176307.6 | 136423.3 |
| 852248.9 | 657563.3 | 143555.3 | 51485.53 | 496622.5 | 8117441  | 1756779  | 1071589  | 26899.27 | 316013.8 |
| 66918.72 | 51963.92 | 0        | 0        | 8703.394 | 36434.09 | 147978.6 | 103047.4 | 0        | 32487.31 |
| 1813902  | 1280654  | 221769.9 | 86912.53 | 376071   | 1687269  | 3402082  | 1603299  | 291304.6 | 1092136  |
| 465809.6 | 245620.9 | 510975.4 | 520298.1 | 475812.8 | 766739.3 | 534921.2 | 645435   | 454648.8 | 45836.53 |
| 284328.4 | 326773.6 | 66130.23 | 72767.79 | 98883.88 | 188150.1 | 372145.8 | 844611.4 | 35262.07 | 79003.7  |
| 135980.6 | 129387.8 | 12246.48 | 12198.46 | 97601.88 | 623363.9 | 495587.7 | 89843.22 | 6640.634 | 98844.98 |
| 341316.9 | 309022.2 | 734131.8 | 815878.4 | 246473.2 | 353730.6 | 267054.3 | 815568   | 448608.8 | 72458.11 |
| 24782686 | 25584786 | 749702.4 | 188590.6 | 1102076  | 23016863 | 43377286 | 69202804 | 6768405  | 14978270 |
| 9769551  | 6394296  | 1332005  | 800954.2 | 1093794  | 4168949  | 22068262 | 17473764 | 34870.51 | 11055271 |
| 1865545  | 1673621  | 179711.9 | 49795.73 | 2022950  | 26056153 | 1602438  | 2644088  | 1023288  | 280898.5 |
| 267506.5 | 199282   | 8812.325 | 9081.81  | 55414.98 | 190838.3 | 549297.6 | 459137.6 | 61339.7  | 155805.7 |
| 208181.9 | 184424.7 | 107045.2 | 71468.48 | 272019.1 | 1241362  | 267810.5 | 290606.2 | 17329.39 | 48531.69 |
| 444041.1 | 287712.4 | 99550.4  | 88195.01 | 358139.7 | 636941.9 | 400530.4 | 430620.1 | 55204.87 | 293068.4 |
| 6887376  | 6127467  | 129953.3 | 288875.7 | 885429.3 | 30729192 | 37127189 | 13999746 | 194263.1 | 2750717  |



|          |          |          |          |          |          |          |          |          |          |
|----------|----------|----------|----------|----------|----------|----------|----------|----------|----------|
| 280035.9 | 225412.2 | 2766.716 | 6851.974 | 16366.16 | 950483.3 | 2218288  | 479656.3 | 21920.17 | 181726.9 |
| 91375.34 | 60100.72 | 30511.63 | 25262.93 | 30364.06 | 382747.9 | 324917.2 | 74358.34 | 23335.53 | 57904.25 |
| 184509.3 | 177796.1 | 12093.74 | 0        | 14489.49 | 123827.9 | 364987.4 | 312786.4 | 40635.56 | 138607.7 |
| 935677.2 | 742800.6 | 5624.614 | 16772.03 | 24914.3  | 1324642  | 1473259  | 1926288  | 67181.61 | 604169.1 |
| 1736222  | 1163536  | 240620.3 | 151380.9 | 990612.2 | 11565105 | 4712191  | 2858289  | 201492.3 | 853770.4 |
| 1185558  | 805538   | 1183123  | 530758.6 | 1513737  | 4567752  | 1250340  | 1052957  | 379370.6 | 827960.1 |
| 106977.3 | 35855.5  | 145736.2 | 158405.4 | 146001.9 | 40691.88 | 149338   | 143855.8 | 126968.7 | 92265.04 |
| 176933.2 | 137136   | 119620.3 | 130744.3 | 7795.874 | 153186.7 | 202217.7 | 255535.8 | 12292.44 | 67348.41 |
| 62559944 | 61599457 | 831471.9 | 685752.8 | 986348.3 | 32524969 | 1.33E+08 | 1.56E+08 | 965689.2 | 52851098 |
| 589087.9 | 495497.2 | 61250.79 | 61862    | 370074   | 583088.9 | 8949675  | 157365.2 | 1143712  | 1115366  |
| 94735.69 | 60156.8  | 0        | 4822.756 | 3227.279 | 0        | 247094.8 | 136447   | 14816.32 | 68050.33 |
| 27493971 | 35538629 | 28509633 | 31141437 | 71760212 | 18308953 | 61292743 | 89793205 | 1502990  | 10587388 |
| 599655.1 | 417926.1 | 134839.4 | 167160.8 | 175805.2 | 2678113  | 2206448  | 833662   | 114006   | 265200.9 |
| 32751435 | 43549613 | 298370.1 | 427602.4 | 495338.8 | 6261230  | 65777128 | 1.08E+08 | 3327682  | 11561597 |
| 956466.5 | 706245.7 | 20289.33 | 12661.5  | 86766.51 | 696144.3 | 2036139  | 1515701  | 175112.8 | 833334.1 |
| 425829.5 | 230940.4 | 50364.48 | 9469.398 | 64461.98 | 1002666  | 165339.8 | 782512   | 188262.7 | 380357   |
| 954055.5 | 609963.7 | 7371     | 3268.675 | 21053.5  | 7229.407 | 2508265  | 1156648  | 1764426  | 117794.8 |
| 431057.9 | 240482.9 | 110005.5 | 37353.19 | 188283.3 | 331756.8 | 812546.2 | 468193.8 | 90632.34 | 304803.8 |
| 6073829  | 8925905  | 0        | 29567.18 | 0        | 337723.8 | 11944195 | 21634589 | 0        | 1973837  |
| 798085.6 | 620088.1 | 352151.4 | 2181862  | 1358280  | 1116808  | 607722.7 | 262575.7 | 633731   | 1871687  |
| 593318.7 | 467793.4 | 0        | 0        | 5894.096 | 2099158  | 4596274  | 754828.4 | 0        | 407414.7 |
| 302521.5 | 278946.5 | 13212.96 | 24980.86 | 45578.37 | 111460.3 | 649478.2 | 591537.2 | 53927.04 | 141083.2 |
| 49818057 | 44550189 | 13591563 | 5674857  | 33961317 | 22742382 | 80685161 | 98790261 | 717705.2 | 12901779 |
| 496072.8 | 297540.4 | 100364.1 | 124862.9 | 279327.5 | 375065.1 | 864164   | 873789.7 | 85328.76 | 344281.2 |
| 139361.9 | 72381.32 | 6609.688 | 0        | 6419.146 | 17290.42 | 361361   | 181734.3 | 28322.12 | 103513.8 |
| 821887.8 | 668257.3 | 70121.32 | 23099.02 | 65526.35 | 1200786  | 1181863  | 1169980  | 166363.1 | 591287.5 |
| 2787505  | 2138508  | 314988.9 | 346997.4 | 1130168  | 3454979  | 3953788  | 3524232  | 208221.6 | 1510775  |
| 144213.8 | 101038.9 | 0        | 0        | 6372.825 | 0        | 375952.2 | 258643.2 | 14685.78 | 102233.3 |
| 8277727  | 6806554  | 2967337  | 2463750  | 5984753  | 1018070  | 14166074 | 18539412 | 205909.5 | 5923596  |
| 655698.1 | 1048325  | 56379.32 | 65886.88 | 104068.9 | 580345.7 | 545551.6 | 217400   | 50568.81 | 75627.67 |
| 9662159  | 15486598 | 82080.11 | 7643.568 | 1896942  | 2201753  | 14798281 | 36986468 | 0        | 3448679  |
| 258642.5 | 182350.2 | 130809.2 | 56850.17 | 237103.7 | 1579318  | 445770.4 | 317055.3 | 45204.32 | 140123.8 |
| 350092.5 | 217242.6 | 67053.95 | 180976.9 | 383578.9 | 1078556  | 907669.1 | 473853.5 | 41873.21 | 207703.3 |
| 1232510  | 899148.2 | 5961.761 | 2427.927 | 70884.12 | 1032438  | 2586726  | 1494320  | 209972.3 | 786021   |
| 117135.7 | 96825.61 | 76764.88 | 94861.56 | 78842.81 | 113405.3 | 43858.3  | 164877   | 24386.26 | 17473.86 |
| 581103.8 | 872089.2 | 4431.667 | 7710.313 | 89406.36 | 914668.3 | 223508.9 | 368044.8 | 4984.938 | 263658.6 |
| 255848   | 118649.3 | 173399.3 | 194412.5 | 244312.5 | 968568.6 | 322140.4 | 296759.9 | 207285.3 | 71772.18 |
| 266088.6 | 268266.2 | 126053.2 | 844553.9 | 538131.6 | 356186.8 | 151038.1 | 73725.28 | 107996.4 | 731740.3 |
| 556584.5 | 436480.2 | 204581.3 | 341447   | 710902.6 | 3379737  | 597638.4 | 765886.1 | 83492.81 | 332969.1 |
| 215916.2 | 453483.3 | 10863.21 | 5620.129 | 135331.9 | 3697850  | 203457.6 | 11678.06 | 4894.318 | 7047.881 |
| 16368759 | 24890658 | 114836.4 | 13268.46 | 198053.4 | 1081968  | 31159587 | 60358820 | 17567.99 | 9074691  |
| 248273.8 | 151564.9 | 326757.7 | 419133.7 | 361585.2 | 355751.8 | 108841.2 | 210671.6 | 170832.2 | 71680.17 |
| 29812665 | 30565291 | 136949.7 | 23638.7  | 429392.7 | 16756537 | 62196949 | 79971245 | 9513500  | 10764555 |
| 280738.4 | 175686.9 | 73816.65 | 30074.9  | 112122.1 | 1462484  | 901147.7 | 244644.4 | 75212.36 | 273425.3 |
| 488125.7 | 320323.8 | 191849.8 | 253335.7 | 189155.3 | 2061375  | 1351213  | 638907.9 | 141089.5 | 166712.6 |
| 6303141  | 4141955  | 753550.5 | 262951.8 | 1491433  | 4495668  | 13009117 | 7151710  | 950984.3 | 4173593  |
| 1475660  | 1235818  | 16597.03 | 0        | 18092.99 | 735569.8 | 3355508  | 2245708  | 9047.08  | 372333   |

|          |          |          |          |          |          |          |          |          |          |
|----------|----------|----------|----------|----------|----------|----------|----------|----------|----------|
| 17140007 | 12535388 | 3405669  | 2432222  | 11383121 | 52743050 | 81704918 | 31995257 | 1880144  | 8719015  |
| 374878.1 | 314489.9 | 15016.2  | 6368.694 | 16096.01 | 1555862  | 2228685  | 319436   | 32250.47 | 365779.7 |
| 341892.3 | 79388.82 | 2423.228 | 9586.595 | 40892.85 | 165022.2 | 840555.8 | 481730.6 | 317706.8 | 305904.7 |
| 1117345  | 686021.3 | 6070.734 | 21792.8  | 44991.93 | 675196   | 2589663  | 1336708  | 204486.5 | 1019360  |
| 2926796  | 1658418  | 1539601  | 1943169  | 1868524  | 13462387 | 5204646  | 5054464  | 1141076  | 2437224  |
| 3161971  | 2018650  | 850800.4 | 770838.4 | 599694.4 | 463929.5 | 7097406  | 2279302  | 1018027  | 3560431  |
| 1352305  | 876046.4 | 98652.89 | 80653.15 | 322505.6 | 2173370  | 1804480  | 1557501  | 183630.9 | 731233.5 |
| 410306.2 | 318477   | 69902.89 | 16683.65 | 241583.4 | 1751744  | 1575298  | 824571.5 | 137893.5 | 371743.3 |
| 1087380  | 759823.1 | 140087.8 | 69319.25 | 523844.6 | 758971.2 | 2058755  | 1406985  | 167632.7 | 713294.4 |
| 11039504 | 13008886 | 229091.7 | 126448.4 | 999885.6 | 425690   | 24576884 | 27642966 | 34163.02 | 3750640  |
| 412088.4 | 196316.5 | 221398.8 | 278863   | 4830367  | 151927.8 | 271591.8 | 598584   | 162493.1 | 308925.1 |
| 275293.1 | 206738.5 | 71040.19 | 56164.61 | 288360.2 | 1429037  | 593889.2 | 306020.2 | 30660.06 | 96378.95 |
| 2494053  | 1996537  | 0        | 9734.198 | 81050.08 | 2149157  | 5122494  | 2675390  | 323468.5 | 1867967  |
| 26319454 | 27973080 | 669355.6 | 417273.7 | 2164917  | 11243991 | 54951108 | 71934245 | 301993.4 | 18562615 |
| 168706.2 | 146969.3 | 14633.45 | 0        | 39214.99 | 351056   | 87205.57 | 318342.7 | 12996.8  | 12593.35 |
| 386525.7 | 330411.9 | 142260.5 | 137612.3 | 141599.1 | 576751   | 278315.4 | 655705.1 | 70466.13 | 56419.79 |
| 381483.6 | 457351.2 | 262981.8 | 400291.1 | 1340397  | 359939.3 | 618548.6 | 1183503  | 55758.55 | 223808.6 |
| 862322.2 | 518532.9 | 146332.1 | 204514.8 | 570109.2 | 265087.8 | 1706046  | 965034.6 | 211227.6 | 457165.6 |
| 2105363  | 1394665  | 174089.9 | 201102.7 | 598500.3 | 2609020  | 3438875  | 2951610  | 194273.9 | 1038500  |
| 233683.7 | 248943.8 | 31212.46 | 41926.54 | 272156.9 | 121779.2 | 229109.5 | 134613.6 | 12401.86 | 42581.7  |
| 1028908  | 899349.2 | 145920.7 | 95407.79 | 105329.2 | 265798.1 | 2295888  | 2470515  | 357627.1 | 743714.4 |
| 392616.3 | 274867.5 | 127052.7 | 81279    | 288563.8 | 121290.5 | 704075.6 | 494158.8 | 30934.88 | 179990.3 |
| 1210429  | 1033979  | 171607.1 | 258003.6 | 231134.1 | 832771.3 | 2249134  | 1542313  | 63651.08 | 445497.4 |
| 158242.6 | 172952.7 | 2818.365 | 2793.729 | 50947.21 | 276204.5 | 104293.9 | 47216.96 | 0        | 51596.25 |
| 63926.82 | 32828.5  | 42408.38 | 38074.8  | 39240.31 | 175831.1 | 157771.3 | 55748.43 | 17788.39 | 71968.13 |
| 2582852  | 2979478  | 1591772  | 490203.1 | 683621.6 | 615036   | 3829858  | 7455104  | 111164.6 | 3284553  |
| 513387.6 | 564693.9 | 3911.311 | 0        | 66799.01 | 637309.9 | 713199.1 | 317127.8 | 56148.97 | 1475590  |
| 241276.8 | 142163.1 | 24232.73 | 2316.938 | 50369.05 | 304524.2 | 420803   | 220038.8 | 49500.66 | 177078.8 |
| 170071   | 158028.3 | 8580.189 | 0        | 169405.6 | 558189.7 | 779073   | 342986.6 | 17413.01 | 106005.1 |
| 464827.6 | 482105.2 | 653240.7 | 637958.8 | 1590801  | 298909.9 | 347683.6 | 109377.1 | 335758.3 | 333124.6 |
| 500685.7 | 117915.6 | 472027   | 760869.7 | 473176.1 | 657441.2 | 449567.5 | 476403.6 | 457126.6 | 458540.5 |
| 161442.9 | 144553.1 | 7060.407 | 6336.708 | 5851.179 | 209324.8 | 254580.9 | 140622.8 | 13377.64 | 126905.3 |
| 1420560  | 1008682  | 40266.39 | 17842.3  | 24761.34 | 258916   | 3576794  | 2479919  | 367945.5 | 1823284  |
| 912708   | 1031810  | 3193.135 | 3019.003 | 13988.1  | 321525.3 | 1954276  | 2144126  | 24222.46 | 213519.3 |
| 307869.4 | 185692.6 | 18870.69 | 2383.921 | 81254.24 | 431390.7 | 493125   | 474927.7 | 55691.05 | 175026.5 |
| 2338228  | 1687911  | 1164415  | 510372.5 | 2141522  | 11588382 | 4699497  | 2273510  | 515095.8 | 1159236  |
| 427876.8 | 569106.2 | 43342.43 | 43674.87 | 109730   | 239826   | 628052.5 | 203832.9 | 62308.42 | 86524.43 |
| 781179.3 | 623372.4 | 707081.7 | 730481.2 | 680907.1 | 1603050  | 1508896  | 1654697  | 39732.76 | 421061.1 |
| 685095.3 | 331342.2 | 392416   | 114214.7 | 196030.6 | 1233306  | 545861.2 | 1018359  | 334227.7 | 322321.3 |
| 248345.8 | 188496.9 | 113516.7 | 133101.7 | 140647.5 | 185980.4 | 313072   | 216347.3 | 60569.81 | 191583   |
| 155721.4 | 113006.5 | 51315.81 | 18709.36 | 171071   | 162036.4 | 1530849  | 306866.4 | 81935.07 | 95411.54 |
| 1030257  | 1074417  | 393121   | 347542.7 | 1836111  | 2888313  | 2353287  | 1410152  | 244629.4 | 249069   |
| 2841271  | 3628128  | 8705.305 | 27655.02 | 35018.38 | 2881161  | 4161394  | 3077327  | 345597.6 | 1320327  |
| 11330855 | 10811650 | 141451.9 | 52819.44 | 134311.3 | 7986291  | 23299863 | 27905554 | 201289.8 | 7244251  |
| 177919.4 | 139098   | 25850.82 | 7333.598 | 73348.83 | 78254.14 | 364202.8 | 176872.5 | 6842.708 | 105964.3 |
| 618416.1 | 645492.4 | 142655.4 | 61404.32 | 118344.3 | 1102452  | 343658.4 | 1746496  | 343009.2 | 165844.2 |
| 34529273 | 51791447 | 29415.99 | 17171.07 | 22665.37 | 3250994  | 67083538 | 1.2E+08  | 19654.84 | 730915.2 |

|          |          |          |          |          |          |          |          |          |          |
|----------|----------|----------|----------|----------|----------|----------|----------|----------|----------|
| 146293.3 | 143867.1 | 15516.05 | 0        | 24074.65 | 8579.85  | 337236.1 | 328721.1 | 27508.28 | 0        |
| 519515.1 | 606832.3 | 0        | 5911.523 | 9196.665 | 429048.5 | 913190.8 | 1017493  | 0        | 151562.4 |
| 435729.7 | 376701.9 | 23335.09 | 37743.13 | 53733.61 | 660031.8 | 570048.4 | 454305.7 | 40515.78 | 70491.24 |
| 177870.2 | 151724.8 | 21804.36 | 18394.01 | 40356.45 | 293014.4 | 185467.9 | 336374.7 | 20198.58 | 44434.4  |
| 182400   | 114655.9 | 146456.7 | 128317.3 | 88883.39 | 79013.66 | 243438.1 | 156040.3 | 28831.89 | 136388.3 |
| 1907530  | 983417   | 305877.2 | 125410.2 | 749898.9 | 2593606  | 2958973  | 2884028  | 456896.9 | 1387008  |
| 20384066 | 17317051 | 306941.2 | 199741.8 | 1188416  | 21147085 | 38137416 | 32139973 | 4099892  | 14369521 |
| 787743.3 | 458511   | 263424.4 | 340661.8 | 355713.8 | 5311623  | 1550143  | 1006032  | 246559.6 | 363468.7 |
| 375810.7 | 433055.2 | 42509.16 | 96579.57 | 454858.5 | 1504725  | 1091851  | 222425.2 | 11609.76 | 49466.98 |
| 26794714 | 31860480 | 26734.07 | 3095.132 | 220130.7 | 3577576  | 60165293 | 73941212 | 396050.2 | 4873026  |
| 1118716  | 1036119  | 2673.266 | 2755.091 | 0        | 1368445  | 1893135  | 1723277  | 142952.4 | 904036.2 |
| 2280722  | 1720346  | 261667.1 | 110219.4 | 553464.5 | 1866833  | 4415463  | 2371024  | 79288.3  | 1298928  |
| 4948950  | 2993089  | 1665200  | 1507484  | 1860064  | 19570638 | 16785189 | 4216615  | 3654230  | 10137312 |
| 549337.5 | 506201.9 | 8099.079 | 0        | 152807.2 | 1058836  | 395332.3 | 775019.4 | 13878.16 | 108564.9 |
| 1.11E+09 | 1.29E+09 | 10710327 | 10236413 | 44632505 | 3.84E+08 | 2.32E+09 | 3.04E+09 | 9618868  | 7.36E+08 |
| 1931724  | 1422753  | 879288.1 | 364324.5 | 1864457  | 11201873 | 3446662  | 1767161  | 379922.2 | 921744.7 |
| 911983.6 | 1137360  | 3123.087 | 8892.505 | 7529.349 | 996877.7 | 1318190  | 1058758  | 18964.86 | 449074.4 |
| 1385300  | 1070798  | 79353.12 | 184195.3 | 563073   | 2131799  | 1601706  | 1345122  | 49010.51 | 649228.1 |
| 137816.8 | 92676.91 | 299541.2 | 170021.3 | 185514.4 | 223114.5 | 35615.56 | 239407.7 | 53451.86 | 35611.3  |
| 23836958 | 30389449 | 8724220  | 4508222  | 14847579 | 3318514  | 31619264 | 76892421 | 711415.6 | 18032381 |
| 773701.8 | 260713.3 | 741732.7 | 789604.4 | 401121.2 | 2459800  | 941871.8 | 774524.6 | 541762.1 | 492917.4 |
| 8155655  | 10686970 | 8377.296 | 0        | 67716.53 | 473692.5 | 17805289 | 25246478 | 0        | 2859575  |
| 1.84E+08 | 1.87E+08 | 2826310  | 2164695  | 3099471  | 89610024 | 3.98E+08 | 4.76E+08 | 2988423  | 1.48E+08 |
| 308766.2 | 224536   | 0        | 0        | 26407.37 | 382904   | 557143.5 | 545365.9 | 24887.2  | 138841   |
| 327536.3 | 315497.8 | 5433.989 | 9668.515 | 6996.14  | 668240.4 | 231177.3 | 333556.5 | 163028.3 | 251464   |
| 956968.3 | 1000126  | 84239.78 | 552095.2 | 7110080  | 325072.2 | 2094375  | 992721.3 | 2671159  | 209329   |
| 1120142  | 952780.2 | 163640.1 | 119610.2 | 218580.3 | 657221.7 | 2243454  | 1977239  | 8899.239 | 181934.8 |
| 12597157 | 7885795  | 1074075  | 800765.2 | 3165857  | 20925223 | 16324148 | 15338728 | 1823828  | 6961448  |
| 86966004 | 1.27E+08 | 23523072 | 10981383 | 78431305 | 3.02E+08 | 3.75E+08 | 330247.8 | 172599.2 | 1.5E+08  |
| 547312   | 475961.7 | 64874.97 | 50370.92 | 143430.6 | 5406936  | 1184088  | 1086823  | 5721.414 | 130237.4 |
| 1894796  | 1469397  | 29196.34 | 23844.19 | 90834.52 | 1821370  | 3788722  | 2176872  | 400214.5 | 1407142  |
| 76064.02 | 79125.55 | 13603.9  | 10222.74 | 23594    | 152185.6 | 12258.55 | 132392.9 | 0        | 0        |
| 1274728  | 1130517  | 47090.76 | 7281.876 | 537477.4 | 40685.91 | 2914443  | 1426243  | 10450.86 | 245778   |
| 11528767 | 21030041 | 734219.9 | 462106.6 | 6118680  | 1944391  | 10883943 | 3387303  | 184517   | 1754973  |
| 498629   | 288047.2 | 75740.98 | 39693.81 | 192618.2 | 260590.5 | 1064054  | 591674.6 | 209274.2 | 255569.8 |
| 13586071 | 12304371 | 168727.6 | 263072.5 | 1338529  | 6755018  | 29835964 | 30672665 | 291779.8 | 9163474  |
| 260902.4 | 100328.5 | 232016.7 | 275911.8 | 197542.4 | 579784.1 | 325999.6 | 240497.3 | 152702.5 | 192184.7 |
| 118251.8 | 85190.89 | 0        | 0        | 0        | 55013.57 | 284094.1 | 143144.9 | 5541.097 | 92021.98 |
| 1490997  | 957921.3 | 403835.7 | 528582.8 | 501593.2 | 6337766  | 4886629  | 2480706  | 424501.7 | 604826   |
| 309765.4 | 78073.83 | 244510.7 | 271329.9 | 297267.5 | 442349.2 | 550661.5 | 393248.8 | 232612.8 | 237935.8 |
| 163280.8 | 143423.1 | 84855.4  | 147611.4 | 783259.4 | 48024.26 | 322391.9 | 364495   | 0        | 207001.3 |
| 1108391  | 781038.8 | 8805.373 | 9293.389 | 118023.1 | 606210.1 | 2552386  | 1648254  | 155579.8 | 480035.6 |
| 277024.3 | 133139.8 | 57947.04 | 35182.79 | 204111.2 | 813391.1 | 1212551  | 493456.9 | 135332.8 | 216304.3 |
| 154168.4 | 95948.99 | 61876.46 | 57816.4  | 76635.61 | 145718.6 | 227275.5 | 166998.3 | 34719.2  | 79153.59 |
| 242691.4 | 187272   | 17095.15 | 0        | 66389.82 | 392489.6 | 304162.2 | 292366.9 | 36097.08 | 66464.46 |
| 6329628  | 5157880  | 47470.99 | 6600.508 | 274222.5 | 756671.1 | 15970919 | 10737067 | 552308.9 | 3234296  |
| 113305.6 | 43811.57 | 124129.3 | 68705.22 | 241771.2 | 134636.8 | 126023.7 | 55615.88 | 97007.43 | 133751.8 |

|          |          |          |          |          |          |          |          |          |          |
|----------|----------|----------|----------|----------|----------|----------|----------|----------|----------|
| 4053925  | 2509375  | 140605.2 | 78194.82 | 681833.3 | 5735377  | 6732917  | 5143529  | 635537.5 | 2205754  |
| 1.84E+08 | 1.12E+08 | 43640257 | 76123285 | 99263193 | 2.61E+08 | 2E+08    | 3.67E+08 | 81368198 | 1.26E+08 |
| 450455.3 | 374497.1 | 239910.2 | 1320930  | 835118.8 | 493041.5 | 328635.5 | 122585.8 | 317547.8 | 1096786  |
| 198215.3 | 190413   | 3586.985 | 6114.699 | 0        | 197486.3 | 365609   | 457324.8 | 26596.82 | 70780.81 |
| 378830   | 292868   | 6780.522 | 4162.204 | 81032.64 | 691146.1 | 409752   | 511973.8 | 14914.42 | 114984.7 |
| 502254.8 | 422990.3 | 2334.303 | 8619.053 | 43539.49 | 131753.1 | 1206141  | 1042448  | 120605   | 505392.2 |
| 427923.2 | 320943.6 | 3499.259 | 0        | 109979   | 545710   | 712309.5 | 775562.2 | 22380.04 | 178965.4 |
| 176324.7 | 203102.4 | 114274   | 109412.1 | 64496.33 | 346176.4 | 979759   | 458279.3 | 53190.68 | 14554.43 |
| 235400.6 | 96834.97 | 99091.91 | 136131.1 | 60761.06 | 1645013  | 414897.4 | 256307.4 | 119273.9 | 150056.6 |
| 2470641  | 4020385  | 2066243  | 1555598  | 3962008  | 20060232 | 187931.8 | 71528.97 | 2416761  | 9446634  |
| 1053330  | 655452.4 | 3030.776 | 8344.324 | 41803.35 | 982800.5 | 2251526  | 1498752  | 176998   | 661196.3 |
| 227625.8 | 258088.6 | 2780.181 | 6049.25  | 16660.22 | 114986.6 | 458451   | 674390.1 | 101399.1 | 116666.7 |
| 268492.1 | 214885.5 | 15535.52 | 8181.42  | 25522.33 | 150988.1 | 593856.5 | 405074.8 | 98095.63 | 235837.8 |
| 299713.4 | 258686.1 | 119274.2 | 103410.8 | 364739.9 | 1031516  | 669299.3 | 61401.12 | 112135.2 | 175414.6 |
| 378318.9 | 201148.7 | 190313.7 | 167063.9 | 196444.2 | 1566738  | 888176.3 | 284196.6 | 225953   | 191045.4 |
| 5164342  | 5585083  | 2127797  | 612410.9 | 1484412  | 614443.9 | 9663265  | 13911927 | 37199.02 | 2103495  |
| 752245.2 | 607104.4 | 163402.3 | 159032.1 | 160703.3 | 2147011  | 4775909  | 1207394  | 23453.79 | 526952.7 |
| 363206.1 | 351202.9 | 31924.29 | 3312.707 | 24879.22 | 60151.11 | 851325.1 | 341008.6 | 103794.5 | 428687.8 |
| 1299467  | 710514.5 | 130526.9 | 2047261  | 1590799  | 268447.4 | 625039   | 1041201  | 1744453  | 1405033  |
| 83868.37 | 79474.98 | 12149.34 | 36043.93 | 62557.73 | 566598.5 | 158359.8 | 73931.87 | 4470.115 | 45797.17 |
| 848613.3 | 670146.2 | 9437.729 | 8632.927 | 22238.33 | 1153928  | 1432097  | 1269523  | 254090.3 | 969231.9 |
| 4092028  | 2553180  | 9170.421 | 6753.249 | 120835.5 | 4602560  | 8207980  | 5879554  | 1276128  | 4479652  |
| 294906.8 | 224771.6 | 33191.86 | 15611.67 | 67369.64 | 309421   | 525407.2 | 293968.8 | 18092.57 | 152578.7 |
| 3102968  | 3625244  | 102288.7 | 46232.24 | 224113.1 | 3177854  | 4852112  | 9414239  | 695601.7 | 1022256  |
| 70526313 | 95018575 | 10087254 | 1.04E+08 | 2.45E+08 | 58661342 | 1.52E+08 | 2.31E+08 | 2174157  | 1621135  |
| 37186274 | 34601404 | 2628897  | 2006139  | 3625975  | 9263303  | 85317977 | 95103508 | 16803110 | 32523642 |
| 381548.1 | 253458.4 | 66375.69 | 13354.08 | 117639.9 | 518464.1 | 580399.9 | 697137.5 | 77195.5  | 170535.3 |
| 350242.4 | 357103.6 | 5465.072 | 2376.636 | 89468.02 | 38085.82 | 796299.9 | 905012.6 | 51275.67 | 384785.2 |
| 868686.1 | 623090   | 344045.1 | 656900.7 | 874903.3 | 2320427  | 1895255  | 920018.5 | 128422.4 | 500284.4 |
| 6405902  | 3159475  | 1494515  | 2544398  | 3832064  | 27099417 | 17134465 | 6828194  | 1190281  | 6320106  |
| 156997.7 | 134884.4 | 0        | 0        | 27718.34 | 294237.4 | 154984.2 | 190136.2 | 13006.8  | 65846.03 |
| 3117763  | 3157297  | 785069.5 | 1220724  | 1447070  | 636374.7 | 5308847  | 7927535  | 17440.33 | 4234645  |
| 389924   | 395859   | 19535.58 | 14237.65 | 119212.6 | 85791.88 | 836442.9 | 832737.5 | 122592.1 | 148551.1 |
| 417907.4 | 143084.1 | 80794.41 | 62761.09 | 119194.9 | 1517801  | 1857569  | 338231.8 | 371796.4 | 652252.5 |
| 246909.2 | 198537.8 | 28480.82 | 16487.86 | 39652.37 | 376591.2 | 331036.4 | 331513.3 | 0        | 71943.76 |
| 257650.6 | 281304.9 | 0        | 3349.544 | 4235.006 | 115627.1 | 554263.2 | 611142.3 | 5795.525 | 96009.54 |
| 831538.4 | 711766.5 | 0        | 0        | 35977.45 | 1137400  | 1357033  | 1336067  | 226174.1 | 742921.3 |
| 172625.5 | 53955.49 | 79210.49 | 89794.41 | 85913.64 | 1529375  | 183760.9 | 228982.5 | 85202.82 | 165891.8 |
| 8641606  | 12800425 | 17737.74 | 5651.797 | 38289.65 | 1368229  | 17039934 | 29341378 | 11255.32 | 245434.4 |
| 708427.9 | 508464   | 46760.89 | 28895.6  | 146284.3 | 1207904  | 881941.8 | 1251788  | 16941.16 | 359894.7 |
| 9837737  | 6627050  | 894664.2 | 821055.5 | 2498077  | 17346486 | 11231086 | 13527304 | 1297199  | 4815436  |
| 964370.4 | 1614285  | 42955.46 | 88880.2  | 98929.42 | 864853.8 | 868790.2 | 262003.7 | 108854.2 | 85718.28 |
| 2208046  | 2017803  | 16870.11 | 2291.125 | 180177.3 | 199480.7 | 5464799  | 3155346  | 603298.9 | 1913053  |
| 410875.4 | 259614.3 | 87471.04 | 77171.47 | 157697.9 | 120526.8 | 890323.8 | 254918.3 | 196352.2 | 430685.3 |
| 5893921  | 7057379  | 590848.4 | 327214.3 | 2483646  | 32843.97 | 11740800 | 11544986 | 0        | 1552603  |
| 14437178 | 7320938  | 2626096  | 1120167  | 5572246  | 19579020 | 22691926 | 21175806 | 3590759  | 10288269 |
| 347420   | 275367.4 | 12098.18 | 6663.357 | 38001.13 | 403905.1 | 626167.3 | 768109.6 | 90399.5  | 116123.8 |

|          |          |          |          |          |          |          |          |          |          |
|----------|----------|----------|----------|----------|----------|----------|----------|----------|----------|
| 2459596  | 2126455  | 431262.9 | 546881.6 | 11722442 | 3676176  | 4427737  | 4121735  | 497637.7 | 1570422  |
| 1122464  | 1704537  | 314402.2 | 328829.7 | 151903.5 | 1215031  | 600276.8 | 689758.1 | 12166.28 | 552391.9 |
| 10315646 | 2058174  | 7613568  | 12108885 | 9909578  | 6618050  | 10365185 | 13164058 | 8265881  | 8470415  |
| 401048.7 | 266051.4 | 3391.541 | 4217.232 | 19783.87 | 155213   | 988139.3 | 593352.7 | 58909.32 | 246321.4 |
| 9821135  | 6259480  | 1538094  | 1506545  | 3248233  | 12070064 | 15736089 | 10131813 | 2265768  | 4889157  |
| 2239230  | 1703839  | 450531.9 | 758595   | 9073672  | 367830.7 | 8910250  | 4657150  | 115515.9 | 1385302  |
| 15926471 | 23309477 | 422176   | 418721   | 1472648  | 6227662  | 27501769 | 57243051 | 1324007  | 7951337  |
| 2418913  | 1366426  | 584033.8 | 358020.3 | 1579602  | 1823789  | 4316397  | 2649204  | 462638.3 | 1688988  |
| 698262.8 | 524941.6 | 61236.26 | 56299.61 | 66507.51 | 1020567  | 1054110  | 966135.4 | 11202.66 | 269490.2 |
| 1186963  | 245713   | 1047196  | 1327139  | 1201561  | 1731193  | 1214474  | 1435852  | 1037509  | 1065510  |
| 15066759 | 6561661  | 6421149  | 6317321  | 7140811  | 56854544 | 40622455 | 12006920 | 7478660  | 24989618 |
| 12970510 | 14669276 | 46294.49 | 35131.32 | 253284.8 | 16808063 | 18615359 | 25783272 | 283290.2 | 3493156  |
| 211269.1 | 106254.4 | 50848.31 | 138543.3 | 131063.5 | 798070.1 | 505882.2 | 280579.6 | 108215.3 | 83078.07 |
| 591875.4 | 511634   | 42915.55 | 11694.95 | 54035.21 | 27285.03 | 1470781  | 509197.1 | 271432.8 | 820863.7 |
| 2725130  | 2695923  | 32385.12 | 7899.688 | 7482.147 | 1388336  | 6031737  | 6834954  | 25465.18 | 2094112  |
| 1.56E+08 | 1.98E+08 | 2346843  | 662282.6 | 3243845  | 58414866 | 3.17E+08 | 4.92E+08 | 16217218 | 57288446 |
| 3.08E+08 | 2.29E+08 | 62424389 | 42686526 | 1.4E+08  | 3.31E+08 | 4.77E+08 | 3.35E+08 | 54745774 | 1.45E+08 |
| 251862.1 | 356503   | 0        | 0        | 150876.7 | 2447631  | 522106.5 | 101830.9 | 0        | 9297.186 |
| 1665938  | 1324985  | 669898.1 | 139395.5 | 400270.9 | 2678376  | 1663284  | 2517820  | 137739.9 | 1079380  |
| 811665.4 | 519836.8 | 84943.07 | 76126.24 | 95205.23 | 1272967  | 1189788  | 1383924  | 128870.4 | 589197.5 |
| 2635204  | 3030152  | 127489.4 | 47774.16 | 69358.9  | 12197703 | 13561900 | 123647.6 | 40225.62 | 3590254  |
| 3177622  | 3015570  | 329222   | 220030.5 | 384435.1 | 920895.1 | 7092222  | 8159840  | 1093997  | 2466003  |
| 3987637  | 3857803  | 1620044  | 520677.9 | 4720681  | 2914040  | 3158380  | 9262761  | 37833.55 | 6726606  |
| 3936701  | 3936813  | 133961.5 | 33222.07 | 3159207  | 927341.5 | 7257755  | 2294113  | 181631.2 | 1038921  |
| 4506383  | 3025811  | 411041   | 345230.9 | 1255605  | 7764565  | 5354326  | 5788040  | 588995.5 | 2180136  |
| 14532780 | 7480244  | 2515025  | 1138985  | 5480082  | 20177475 | 22566460 | 21309995 | 3599863  | 9996293  |
| 793606.2 | 715924.4 | 27084.86 | 23793.71 | 61833    | 279783.5 | 1837085  | 1871993  | 228206.9 | 461598.6 |
| 178280.8 | 187483.6 | 6483.111 | 8749.749 | 20939.34 | 177683.8 | 300592.7 | 383878.5 | 36152.64 | 41579.36 |
| 26778541 | 21830175 | 1490685  | 635002.3 | 3688325  | 10624558 | 61759408 | 54178623 | 7708082  | 24510200 |
| 65488.21 | 66569.04 | 7555.449 | 18704.06 | 28342.79 | 609406.2 | 114134.2 | 132430.7 | 13310.96 | 6874.478 |
| 114893.5 | 134889.9 | 0        | 0        | 3129.561 | 22169.46 | 260152.7 | 239426.2 | 4091.344 | 32845.03 |
| 1211708  | 809888.1 | 181133.7 | 130970.5 | 402057.8 | 396879.1 | 2711471  | 2147812  | 251267   | 611291.1 |
| 211322.9 | 169258.8 | 222396.1 | 245634.6 | 259043.4 | 227447.5 | 413924.6 | 368714.1 | 37246.15 | 157523.4 |
| 171576.6 | 102125.6 | 31363.97 | 118818.7 | 48345.2  | 69143.04 | 329755.5 | 188342.2 | 120055.2 | 98492.29 |
| 3703349  | 2940873  | 34339.39 | 29152.72 | 321107.2 | 3218868  | 7670892  | 6479114  | 52939.89 | 1028641  |
| 123614.6 | 75816.47 | 83832.3  | 80935.04 | 193706.8 | 499648.7 | 86744.3  | 147337.9 | 25221.58 | 102033.8 |
| 174167   | 185735.2 | 81017.3  | 43629.23 | 143823.5 | 804909.1 | 405218.8 | 59769.32 | 11918.08 | 72435    |
| 430924.3 | 475805.3 | 19390.17 | 101015.1 | 272843.4 | 565103.4 | 327624.2 | 216525.8 | 299551.1 | 1271281  |
| 1589341  | 1290292  | 77873.52 | 42538.35 | 121753.2 | 469903   | 3822890  | 3262817  | 451539.9 | 1530571  |
| 1104893  | 732022.2 | 85138.6  | 98572.08 | 163091.7 | 1004267  | 2235674  | 1632437  | 125505.8 | 648989.3 |
| 7891882  | 6264893  | 41443.17 | 0        | 282913.4 | 627855.1 | 20460425 | 13386658 | 896233.5 | 4146539  |
| 79028047 | 1.14E+08 | 11276538 | 5147001  | 9973329  | 25114396 | 1.34E+08 | 2.67E+08 | 934257.7 | 1.08E+08 |
| 1317336  | 2501580  | 217891.5 | 82574.95 | 966454.3 | 452149.6 | 563055.5 | 5785847  | 98112.61 | 239689.7 |
| 1306506  | 591265   | 48416.36 | 58199.88 | 266579.5 | 2096437  | 2043867  | 1206596  | 716190.3 | 847210.4 |
| 202428.9 | 141828   | 0        | 0        | 0        | 5863.953 | 543342.2 | 290648.3 | 4316.166 | 99273.15 |
| 1137957  | 1557993  | 1081047  | 993961.6 | 356980.8 | 83422.37 | 445263.6 | 3866072  | 249824.5 | 95336.87 |
| 1163779  | 1251744  | 15014.42 | 0        | 324314   | 9084164  | 3301305  | 516328.5 | 7872.662 | 374499.2 |

|          |          |          |          |          |          |          |          |          |          |
|----------|----------|----------|----------|----------|----------|----------|----------|----------|----------|
| 5592442  | 5442860  | 2208837  | 652417.4 | 1816326  | 107942.9 | 11475993 | 14003639 | 24046.34 | 2787993  |
| 508039.6 | 339034.5 | 54627.21 | 46645.97 | 119365.1 | 820586.9 | 676085.6 | 629712.9 | 74176.24 | 226081.2 |
| 1217711  | 1139983  | 29697.77 | 4462.055 | 105242.7 | 1314369  | 2182677  | 1758657  | 189828.8 | 802737.3 |
| 1431560  | 370846.7 | 1088043  | 1740596  | 1578128  | 700232.8 | 1144625  | 2043229  | 1157302  | 1301476  |
| 1440259  | 971857.1 | 0        | 12142.53 | 43093.32 | 2464427  | 2101350  | 1777100  | 223475.5 | 763934.4 |
| 725720.8 | 154182.7 | 567656.3 | 764810.7 | 706992.5 | 1111238  | 898292.8 | 965234.9 | 699605.6 | 666757.5 |
| 16546913 | 22164353 | 1128262  | 1059355  | 6553390  | 8236794  | 25366149 | 4574286  | 1589332  | 5660122  |
| 18279953 | 16240499 | 5175500  | 2927275  | 3908515  | 7844907  | 36425621 | 39188270 | 508329.4 | 10821033 |
| 16294676 | 12680558 | 1718121  | 1596709  | 5053646  | 21842211 | 23858952 | 13330280 | 1833359  | 9015975  |
| 54063624 | 33286240 | 12428312 | 22178610 | 29100495 | 77894258 | 58653915 | 1.08E+08 | 23546314 | 37068582 |
| 1249416  | 1030267  | 86735.53 | 60674.42 | 535398.6 | 2794986  | 245117.2 | 2356797  | 271453.1 | 1108812  |
| 423036   | 266894.8 | 111371.4 | 97426.54 | 87170.33 | 430846.1 | 5360882  | 759481.8 | 157577.9 | 323644.6 |
| 390548.1 | 588019.8 | 31546.7  | 12969.79 | 28108.39 | 39319.25 | 739139.6 | 1434971  | 230296   | 70917.11 |
| 900696.3 | 813632.7 | 3901.624 | 8724.104 | 9118.788 | 45267.19 | 2306997  | 2071576  | 43046.92 | 270875.5 |
| 237638.6 | 116108.8 | 39706.45 | 25033.65 | 63208.66 | 200544   | 488022   | 325967.3 | 68671.51 | 171685.5 |
| 4718251  | 3201278  | 1643393  | 2050079  | 1774147  | 5568849  | 6180964  | 6561476  | 649371.3 | 1868399  |
| 123284.1 | 48586.09 | 22637.84 | 30426.57 | 15410.74 | 63210.1  | 281238.1 | 192941.7 | 107731.4 | 116088.8 |
| 1712624  | 1445440  | 243055   | 150380.3 | 154145.5 | 403640   | 4003587  | 2633452  | 17627.83 | 762660   |
| 246514.8 | 153106.5 | 157687.5 | 229313.8 | 159328   | 82998.22 | 313971.7 | 231416.2 | 35293.87 | 321291.9 |
| 24554589 | 21995869 | 4514551  | 5695425  | 7198009  | 29173222 | 33482002 | 19070698 | 4169540  | 15782386 |
| 1085740  | 781984   | 78624.35 | 18955.66 | 226806.9 | 1983877  | 1227966  | 1591509  | 74255.56 | 417707.5 |
| 675632.6 | 1071523  | 173006.7 | 4658165  | 1634813  | 297546.3 | 227202.6 | 56547.04 | 285648.3 | 2586212  |
| 7593856  | 4148618  | 1169122  | 1193288  | 3021368  | 8738136  | 12988221 | 9025390  | 572587.6 | 7622727  |
| 5280278  | 5092558  | 6813387  | 3175436  | 15245167 | 2431856  | 10715726 | 13373362 | 118685.6 | 6690496  |
| 15403333 | 13055821 | 285860.9 | 59297.45 | 515645.1 | 3485780  | 38265503 | 30022443 | 4920276  | 14495371 |
| 375845.4 | 274942.3 | 16786.03 | 29629.81 | 82605.72 | 454719.6 | 650169.6 | 353889.9 | 54834.91 | 169422.7 |
| 1090413  | 1997689  | 504302.4 | 528606.1 | 137804.4 | 3729960  | 5718119  | 4660964  | 321549.4 | 90399.22 |
| 2953762  | 6057728  | 750912.3 | 1817659  | 1798470  | 7527.738 | 50731.77 | 541217.1 | 13784171 | 303100.6 |
| 930996.5 | 439358.8 | 334913.7 | 233393.1 | 565938.8 | 2793679  | 3305442  | 1158165  | 425623.3 | 1539684  |
| 714603.2 | 441693.2 | 106455.6 | 99583.29 | 848929.2 | 3083684  | 1639598  | 925957.9 | 94073.34 | 426173.2 |
| 223692.7 | 197504.8 | 5815.133 | 0        | 3231.118 | 115412.6 | 514499   | 203922.9 | 11295.55 | 174911.1 |
| 24594129 | 34714929 | 203534   | 132474.5 | 1521186  | 2383394  | 51410596 | 81594191 | 0        | 361756.5 |
| 255302.1 | 34135.28 | 9720.517 | 19317.21 | 18312.02 | 548565.7 | 275731.4 | 211860.7 | 287384.3 | 248986.1 |
| 148883   | 70823.67 | 125989.1 | 169172.7 | 136645.9 | 393002.2 | 137146.6 | 218885.6 | 70186.04 | 226710.4 |
| 285457.9 | 248132.2 | 0        | 4812.855 | 23821.84 | 296640.1 | 543620.6 | 540507.4 | 69317.81 | 266522.3 |
| 8268291  | 4450774  | 1726215  | 998882.4 | 4925736  | 13008795 | 9674107  | 14752535 | 2553951  | 6859135  |
| 146114.4 | 122725.4 | 0        | 9081.489 | 47333.45 | 207651.5 | 206363.5 | 116091.9 | 13172.54 | 60666.35 |
| 726638.3 | 599768   | 2381.799 | 0        | 3663.993 | 1004530  | 1235322  | 1634184  | 83333.32 | 295606.9 |
| 112298.1 | 82709.89 | 2772.307 | 2873.716 | 0        | 67581.2  | 262125.2 | 142886   | 6394.938 | 68728.84 |
| 696871.8 | 547502.6 | 65665.97 | 202545.3 | 332481.6 | 466580   | 1256774  | 664623.3 | 168963.7 | 397245.5 |
| 485919.8 | 677715.1 | 17772.51 | 3464.658 | 55850.66 | 630728   | 502423.8 | 222101.1 | 33988.12 | 46500.42 |
| 1549706  | 1432935  | 301952.9 | 213452.9 | 991205   | 678379.4 | 2718887  | 1159376  | 415770.5 | 1143078  |
| 818785   | 529840.1 | 30239.3  | 9598.203 | 116764.3 | 1247462  | 1308281  | 975916.3 | 117205.2 | 423763.3 |
| 499042.3 | 320311.6 | 147262   | 160673.9 | 336871   | 1882072  | 1392124  | 705102.6 | 50959.5  | 287185.2 |
| 180349.8 | 179581   | 0        | 5707.241 | 0        | 125869.1 | 379082.3 | 310163.2 | 29185.25 | 55635.69 |
| 287234.2 | 334662.2 | 62929.14 | 0        | 25213.78 | 117586.1 | 568793.7 | 840259.4 | 0        | 49290.81 |
| 2666092  | 2167384  | 350873.3 | 695012.8 | 1533283  | 716022.2 | 5259609  | 1251479  | 1418487  | 1738041  |

|          |          |          |          |          |          |          |          |          |          |
|----------|----------|----------|----------|----------|----------|----------|----------|----------|----------|
| 289323.8 | 55710.91 | 150351.1 | 215334.9 | 239163.2 | 383573.1 | 290282.9 | 252722.2 | 241614.2 | 258598   |
| 1041818  | 984684.5 | 0        | 0        | 29722.35 | 262092.7 | 2535884  | 2089817  | 0        | 22083.94 |
| 799936.6 | 716890.4 | 0        | 0        | 35977.45 | 986505.2 | 1406433  | 1319380  | 88253.68 | 602523.6 |
| 167019.2 | 124130.4 | 39607.3  | 70683.22 | 77062.54 | 859959.6 | 403023.6 | 228550   | 10442.28 | 67330.9  |
| 4202630  | 3793730  | 457013.1 | 255156.6 | 2207262  | 6342595  | 4326089  | 9716444  | 89421.01 | 1427539  |
| 254893.8 | 58072.38 | 26650.65 | 17702.43 | 76622.69 | 420256.4 | 386829.7 | 196411.7 | 219092.5 | 232709.6 |
| 328983.1 | 183278.9 | 0        | 0        | 16979.66 | 0        | 904119.9 | 518924.4 | 73017.75 | 391935.6 |
| 262607.5 | 247151.7 | 0        | 0        | 6254.599 | 230081.5 | 531772.7 | 565513.6 | 48419.94 | 209470.9 |
| 148075.8 | 94791.94 | 23203.74 | 14086.29 | 29352.9  | 594786.1 | 643936.9 | 231902.4 | 64998.59 | 243538.9 |
| 923683.1 | 777580.7 | 217002.7 | 225622.4 | 277934.9 | 374414   | 1843248  | 1508394  | 46270.41 | 182996.3 |
| 98323.63 | 117188.2 | 29343.25 | 58126.43 | 39845.69 | 119060   | 42796.71 | 285096.4 | 0        | 28147.07 |
| 1522519  | 207119.7 | 1164482  | 1384709  | 1049390  | 1994813  | 1338636  | 1417124  | 1361874  | 1360196  |
| 946761.7 | 563414.9 | 230898.7 | 97170.7  | 612737.9 | 839328.7 | 1629731  | 1119042  | 171500.9 | 576746.3 |
| 8771427  | 18179417 | 40863.02 | 31728.75 | 223603   | 351240.3 | 11915482 | 41275310 | 1624096  | 150104.8 |
| 7727763  | 8713198  | 98473.47 | 92089.69 | 164464.1 | 10203105 | 11223110 | 15417475 | 188344.4 | 2077253  |
| 138567.1 | 151582.6 | 82773.86 | 63449.3  | 73355.29 | 237054.5 | 815366.1 | 133004.8 | 31155.13 | 64553.9  |
| 347067.2 | 230631.2 | 52905.57 | 79488.26 | 233353.2 | 1594528  | 945449.9 | 288811.5 | 38949.92 | 256001.9 |
| 1.72E+08 | 3.73E+08 | 15156328 | 86463104 | 2111957  | 1.24E+08 | 2707403  | 5542645  | 10056070 | 3428116  |
| 3000445  | 1926238  | 473159   | 532512.3 | 3590072  | 13243493 | 6415030  | 3791500  | 383299.9 | 1696979  |
| 779993.4 | 435360.9 | 264002.7 | 400596.5 | 204891   | 1043341  | 1027655  | 891868.8 | 205672.3 | 454905.9 |
| 1494399  | 1845423  | 232441.7 | 73238.13 | 459231.3 | 350744.9 | 2850335  | 4691646  | 20340.94 | 602910.2 |
| 3680587  | 2242171  | 881138.2 | 842400.2 | 981397.1 | 2514421  | 7420905  | 4079095  | 1038941  | 3152577  |
| 740750.9 | 830082.6 | 661535.9 | 378110.6 | 99022.06 | 686174.3 | 454261.8 | 410189   | 2199361  | 116554.2 |
| 2168276  | 1934928  | 208293.5 | 26744.4  | 995399.7 | 2091296  | 3617917  | 2507117  | 171232   | 333531.5 |
| 326037.6 | 201715.7 | 44898.76 | 2397.325 | 129806.4 | 423650.4 | 532875   | 507940.1 | 71126    | 159547.5 |
| 4816737  | 6699640  | 96602.04 | 3259.553 | 584813.8 | 354949.9 | 10160296 | 15971292 | 3769.933 | 1821365  |
| 2628344  | 4112952  | 644668.6 | 18398352 | 6151305  | 1204638  | 709314.6 | 386254.2 | 1028110  | 9972276  |
| 294205.4 | 185970.5 | 22381.08 | 13968.9  | 176291.1 | 1478304  | 889366.6 | 473055.3 | 27538.75 | 178367.8 |
| 329755   | 255813   | 337520.3 | 347812.9 | 686252.9 | 486326.4 | 277987.1 | 351459.6 | 58703.03 | 200333   |
| 19643639 | 22737160 | 34608.27 | 4777.783 | 163639.3 | 3672767  | 45956835 | 53861763 | 742514.4 | 5347251  |
| 8484854  | 6558526  | 887071.7 | 643858   | 1673817  | 11173346 | 13611681 | 8538191  | 1094882  | 7064526  |
| 134067.2 | 90722.42 | 55136.91 | 2992.363 | 102860.2 | 45543.64 | 252871.3 | 229720.2 | 9105.246 | 77347.16 |
| 178558.5 | 148408   | 74141.15 | 66174.13 | 155568.3 | 597935   | 454996.9 | 167842.3 | 64701.56 | 74505.34 |
| 191536.6 | 150738   | 11931.28 | 8349.593 | 39669.22 | 328733.5 | 234137.5 | 360026.1 | 17122.62 | 66056.87 |
| 167507.1 | 87663.15 | 160222.9 | 176313.7 | 39895.03 | 71461.08 | 209077.2 | 244696.8 | 70692.96 | 109687.2 |
| 653652.6 | 513920.7 | 244265.4 | 124166.5 | 966922.8 | 1098459  | 2677367  | 1487708  | 291300   | 669834.9 |
| 18468298 | 14929094 | 1045488  | 473646.4 | 2639456  | 8043467  | 42894021 | 36840626 | 5413733  | 17449507 |
| 402313.1 | 472947.5 | 70513.32 | 57020.57 | 245641.5 | 263819.8 | 542867.7 | 588013.2 | 45266.15 | 108337.8 |
| 206155.6 | 192860.5 | 73032.85 | 54757.64 | 161670.8 | 1129101  | 405687.1 | 120597.8 | 11035.95 | 87335.03 |
| 45881.16 | 36726.67 | 10585.6  | 0        | 34610.92 | 275736.6 | 104555.4 | 90581.67 | 4970.036 | 16738.34 |
| 316223.5 | 199216.7 | 100198.3 | 67214.98 | 116248.6 | 582619   | 252748.8 | 438539.6 | 74953.96 | 127954.7 |
| 542628.5 | 535279.2 | 2524.079 | 0        | 43830.24 | 333757.8 | 1170812  | 897488.7 | 25518.8  | 354146.3 |
| 169600.5 | 140427.9 | 6605.792 | 0        | 36424.59 | 303549.5 | 192993.1 | 124810.9 | 5901.746 | 131573.5 |
| 423533.7 | 423577.7 | 2383.351 | 3041.388 | 0        | 325124.9 | 881240.2 | 765896.2 | 72520.13 | 299698   |
| 1889781  | 2986562  | 451385.9 | 13531226 | 4318695  | 801118.7 | 555019.5 | 225737.3 | 657423.1 | 7220918  |
| 690903.6 | 645091.8 | 235963.6 | 343220.9 | 745641   | 2849330  | 1271226  | 671812.6 | 63853.41 | 233394.2 |
| 5754061  | 3329978  | 1323586  | 787477.8 | 3475767  | 2522556  | 11782781 | 6024232  | 1230343  | 3861462  |

|          |          |          |          |          |          |          |          |          |          |
|----------|----------|----------|----------|----------|----------|----------|----------|----------|----------|
| 135815.1 | 227984.6 | 0        | 0        | 71572.19 | 1599379  | 193852.2 | 82293.63 | 0        | 12064.4  |
| 1460163  | 1113882  | 89717.71 | 28606.27 | 306295.6 | 2552281  | 1792810  | 2053650  | 204868.5 | 452613.4 |
| 1543206  | 952459.4 | 169218.1 | 98027.26 | 431140.6 | 2828064  | 1763920  | 2412974  | 228477.7 | 905742.8 |
| 584360.4 | 262581   | 660749.3 | 532129.9 | 434764   | 412812.6 | 422787.5 | 1017037  | 322215.4 | 553548.1 |
| 337071.2 | 164844.6 | 83586.93 | 40048.88 | 155484.2 | 632685.2 | 310207.3 | 337234   | 69845.43 | 337436.8 |
| 1345326  | 1079120  | 684945.1 | 1005328  | 11947274 | 755880.2 | 728305.4 | 2585281  | 108007.9 | 2320066  |
| 554970.4 | 527805.2 | 49956.32 | 165849.7 | 345126.7 | 854249.4 | 383247.7 | 58877.48 | 435125.5 | 1456643  |
| 19119855 | 12822956 | 264654.5 | 128312   | 1067969  | 17424836 | 41569564 | 24376634 | 3108318  | 12490305 |
| 159440.2 | 79915.34 | 152964.2 | 103491.7 | 103619.3 | 226420.3 | 519384.1 | 213853.7 | 40602.41 | 128071.9 |
| 237670.4 | 149042.8 | 0        | 4141.077 | 10056.68 | 0        | 651741.4 | 398147.4 | 0        | 303085.9 |
| 11675748 | 12948514 | 78268.26 | 82107.32 | 194051.8 | 3337023  | 27073938 | 33333940 | 1135753  | 4717536  |
| 61905543 | 46563533 | 12584267 | 8274006  | 28352635 | 67562891 | 97417805 | 67803013 | 10351700 | 28711307 |
| 579107.5 | 869775.9 | 96303.02 | 102383.6 | 115769.8 | 776272.4 | 315044.7 | 241326.6 | 13100.74 | 337456.1 |
| 2231495  | 2523689  | 1257036  | 216279.3 | 629033.4 | 794152.4 | 3672771  | 6725058  | 819535.2 | 1196015  |
| 474647.7 | 228867.2 | 122982.2 | 25427.67 | 0        | 201362.3 | 1160247  | 704633   | 425217.3 | 412330.3 |
| 7138827  | 4876725  | 929196.8 | 688464.7 | 4046796  | 40722694 | 18339009 | 12050203 | 840665.3 | 3556797  |
| 241609.1 | 117361.7 | 40265.49 | 0        | 103378.6 | 205052.7 | 493690.5 | 116897.1 | 301821.7 | 382425.7 |
| 128445.2 | 180511.2 | 2731.723 | 8005.569 | 50767.19 | 1366154  | 212040.8 | 11474.03 | 0        | 0        |
| 1657820  | 2134676  | 48580.33 | 13421.7  | 91048.2  | 626033.5 | 3415432  | 5392677  | 0        | 749311.1 |
| 4051262  | 2833283  | 347758.4 | 256298   | 169325.7 | 1129231  | 10140666 | 8464500  | 1921851  | 2394407  |
| 1117807  | 693507.1 | 78409.91 | 35382.05 | 237884.4 | 1787776  | 1672960  | 978591.1 | 189109.4 | 959934.8 |
| 537548.3 | 800328.5 | 22663.31 | 12131.51 | 41273.76 | 668140.8 | 553149.7 | 111211.5 | 40636.92 | 143099.2 |
| 87383.58 | 80300    | 55508.78 | 118816.5 | 80705.11 | 366907.1 | 59355.26 | 229032.3 | 41528.78 | 38571.37 |
| 740785.2 | 434514.2 | 576757.7 | 770984.8 | 863810.8 | 939917.3 | 1387654  | 328467.6 | 871572.9 | 491256.8 |
| 1182853  | 928125.2 | 2222.268 | 8596.506 | 0        | 1780780  | 1952199  | 2391796  | 77814.56 | 806189.5 |
| 82722.66 | 38092.5  | 8181.637 | 4783.81  | 16087.16 | 156021.9 | 103764.6 | 97270.88 | 30380.93 | 55577.75 |
| 14832058 | 8201779  | 3906982  | 2283606  | 9422210  | 13013884 | 25900049 | 16798407 | 3228539  | 10140320 |
| 163830.5 | 169938.8 | 2802.376 | 0        | 19095.27 | 1476084  | 392585.3 | 90561.75 | 0        | 67642.88 |
| 1218786  | 816930.7 | 523474.3 | 3320508  | 2120445  | 1506953  | 807311.2 | 591173.9 | 888462.8 | 2650407  |
| 160272.8 | 84187.31 | 23509.47 | 23489.55 | 21987.38 | 275547.6 | 219331.5 | 150882.1 | 50404.58 | 117925.7 |
| 75754.46 | 11163.31 | 65578.56 | 98137.44 | 86107.99 | 78718.16 | 76094.57 | 68464.39 | 65134.79 | 69469.16 |
| 619301.9 | 402505.8 | 110966.6 | 69773.47 | 356089   | 392732.3 | 1207767  | 1156553  | 97547.82 | 449926.9 |
| 130567.6 | 85917.01 | 4932.294 | 2832.204 | 9971.562 | 157695.1 | 252412.8 | 225376.3 | 17632.33 | 90127.01 |
| 18778641 | 19330868 | 9134445  | 2446408  | 12652320 | 8156668  | 27229690 | 46221495 | 9426.551 | 9404684  |
| 353849.1 | 218849.2 | 190617.9 | 193090.4 | 198783.8 | 1712415  | 594477.9 | 536954.2 | 99595.5  | 130813   |
| 56381240 | 35242731 | 5309920  | 2448957  | 12946785 | 83532886 | 89345609 | 48076231 | 10424040 | 39773329 |
| 377540.9 | 246484.3 | 41940.17 | 48391.12 | 52329.38 | 250018.4 | 833231   | 484239.4 | 49549.11 | 197377.3 |
| 943529.9 | 1703740  | 9752.436 | 4908.845 | 0        | 172655.6 | 1578343  | 3954463  | 0        | 0        |
| 819517.6 | 870927.2 | 60616.3  | 42825.95 | 203877.5 | 1321323  | 830042.1 | 1704188  | 95764.22 | 107841   |
| 685683.8 | 570038.4 | 66547.83 | 11272.63 | 254173.1 | 193676.1 | 1554563  | 1569508  | 131687.2 | 270995.3 |
| 829116.4 | 674008.9 | 122958.9 | 84305.16 | 97440.35 | 445680.9 | 1820479  | 777285.4 | 159322.3 | 545648.2 |
| 83144172 | 1.72E+08 | 59038.74 | 83610.72 | 1.23E+08 | 306689.6 | 1297044  | 3.89E+08 | 25161871 | 396511.6 |
| 910370.1 | 645313.5 | 2467.161 | 4521.867 | 125964.5 | 3525786  | 4727079  | 1190210  | 100270.5 | 811168.8 |
| 7614679  | 6480268  | 191094.9 | 241893.7 | 114670.6 | 1186506  | 19497480 | 16221500 | 7974158  | 11193889 |
| 264220.7 | 189392.8 | 3024.284 | 4886.256 | 11730.87 | 319397   | 510248.3 | 369409.6 | 21011.25 | 141633.8 |
| 7514303  | 6298888  | 1307016  | 1951248  | 1756183  | 16192591 | 2265878  | 9574344  | 1679812  | 5537167  |
| 12775236 | 8754137  | 2419437  | 1090980  | 4384514  | 7881975  | 26690485 | 16052407 | 2435375  | 7445037  |



|          |          |          |          |          |          |          |          |          |          |
|----------|----------|----------|----------|----------|----------|----------|----------|----------|----------|
| 425137.3 | 372387.7 | 34102.88 | 0        | 49905.65 | 78525.66 | 1046850  | 627472.1 | 65523.96 | 332194.4 |
| 762878.6 | 451954.9 | 573046.5 | 353338.4 | 1349515  | 2036555  | 785641.6 | 384872.5 | 359882.7 | 621881   |
| 490917.6 | 163476.2 | 299746.3 | 339837.8 | 348872.4 | 311084.2 | 757307.3 | 586472.8 | 353598.3 | 513327   |
| 1479889  | 481841.8 | 755433   | 675954.2 | 822580.7 | 4644121  | 3677424  | 1139153  | 1299778  | 2331584  |
| 2.33E+08 | 3.28E+08 | 1.5E+08  | 90640276 | 1671095  | 3.5E+08  | 2246451  | 1379088  | 4.52E+08 | 2206376  |
| 15066708 | 14841821 | 2916479  | 3589601  | 4714834  | 17838530 | 19432618 | 10075536 | 2339417  | 9137806  |
| 3594102  | 3337789  | 313573.9 | 253914.6 | 1843455  | 3112972  | 44021267 | 721265.7 | 8441294  | 5686191  |
| 1062893  | 1030801  | 14655.02 | 2548.543 | 10272.11 | 218093.2 | 2645695  | 1839633  | 255416   | 745060.7 |
| 1326168  | 942810.7 | 297027.6 | 207513.8 | 945090.8 | 3981431  | 5170011  | 854246.3 | 213708.3 | 940322.6 |
| 186103   | 140927.8 | 142650.9 | 158726.8 | 164201.5 | 123477.5 | 109161.7 | 352686.6 | 67602.69 | 89926.87 |
| 1174689  | 782745.6 | 406451.1 | 174080.5 | 693442.4 | 1017305  | 1951414  | 1266296  | 261079.8 | 820048.3 |
| 515850.8 | 471882   | 0        | 3556.164 | 26379.05 | 409195.5 | 1097217  | 1090394  | 0        | 65663.51 |
| 3082254  | 3360074  | 22711.73 | 134023.6 | 589781.9 | 106097.3 | 7334001  | 5782525  | 0        | 1515024  |
| 3363657  | 2004204  | 725726.9 | 275805.7 | 209006.8 | 349351.1 | 8625278  | 5478007  | 1747213  | 3738838  |
| 8011967  | 6081028  | 1739309  | 1202038  | 4411002  | 54235325 | 16004977 | 10283977 | 333445.2 | 2915566  |
| 430317.2 | 361916.3 | 43935.11 | 23487.41 | 204062   | 486357.2 | 674258.9 | 472586.6 | 31118.34 | 171508.5 |
| 3077643  | 2937665  | 864210   | 456489.2 | 1048752  | 1143365  | 6031104  | 7424638  | 456136.2 | 252345.8 |
| 221089.9 | 166988.3 | 49724.27 | 33242.05 | 61933.38 | 207262.6 | 398172.4 | 187540.7 | 37381.32 | 99726.08 |
| 279911.3 | 191454.5 | 64822.26 | 20498.24 | 132885.8 | 1588457  | 711611.3 | 278085.9 | 38415.16 | 152574.7 |
| 142882.5 | 71354.37 | 63573.41 | 38324.65 | 68055.15 | 470601.1 | 445676   | 234345   | 46521    | 112195.5 |
| 470566.9 | 567448.1 | 3432.357 | 7023.113 | 261977.8 | 4152355  | 900902.8 | 232321.5 | 0        | 31102.47 |
| 72913.7  | 42935.72 | 16273.17 | 7345.414 | 83344.45 | 335540.2 | 148057   | 131462.7 | 13515.17 | 57628.27 |
| 338481.1 | 283466.8 | 3674.537 | 8787.084 | 44820.31 | 170389   | 784699.1 | 657825.5 | 69004.12 | 98388.17 |
| 247467.3 | 238662.3 | 34847.67 | 21836.49 | 39346.55 | 128298.1 | 517830   | 616882.9 | 8690.88  | 137430.8 |
| 341449.7 | 272180.5 | 90596.48 | 123806.4 | 29017.41 | 935777.8 | 1882154  | 389760.2 | 105074.7 | 264538.1 |
| 1557504  | 1190948  | 53167.5  | 17607.39 | 190834.2 | 1438741  | 3240651  | 2798760  | 596969.7 | 1531020  |
| 1597865  | 1367892  | 48596.97 | 33629.3  | 203524.2 | 610308.1 | 3800249  | 2880689  | 452402.4 | 1209629  |
| 741123.2 | 556392.4 | 153795.7 | 95725.33 | 192759.6 | 273333.7 | 1647567  | 991513   | 76893.21 | 586870.2 |
| 358417.5 | 221210.3 | 156163.4 | 149289.6 | 232465.1 | 326966.4 | 509781.7 | 318121.3 | 88032.73 | 224140.1 |
| 506526   | 135028.8 | 361151.6 | 475985.4 | 480317   | 427666.2 | 548242.3 | 668007.1 | 336593.5 | 451578.3 |
| 511262.6 | 570180.4 | 0        | 0        | 91198.03 | 3882422  | 1415343  | 250099.2 | 0        | 110435.8 |
| 3065400  | 1862654  | 712600   | 575858.5 | 3900615  | 7216786  | 10140069 | 3820358  | 544454.4 | 1692152  |
| 442046.1 | 282338.8 | 40514.47 | 61913.05 | 86353.89 | 1729824  | 1892813  | 582935.9 | 182858.8 | 763046.7 |
| 427075.8 | 532242.2 | 172929.8 | 179482.5 | 411153   | 132206.7 | 360323.6 | 384613.7 | 6618.901 | 262039   |
| 13064672 | 8185758  | 1402416  | 1879231  | 5250324  | 19625562 | 18344724 | 17975975 | 1932977  | 6710835  |
| 2214221  | 2594914  | 1126854  | 663089.2 | 2526739  | 932401.5 | 1508214  | 2745334  | 409259.4 | 417958.8 |
| 15065863 | 6174060  | 6305329  | 5796191  | 7129395  | 53820318 | 39976607 | 13162099 | 7358935  | 24476123 |
| 181728.8 | 131434   | 5708.914 | 8912.228 | 3215.582 | 167035.2 | 391226.7 | 258218.4 | 15811.24 | 149112.7 |
| 12620947 | 12328526 | 88022.07 | 33320.24 | 102531.6 | 6364686  | 29217926 | 29239597 | 1751778  | 5485883  |
| 1138160  | 888979.9 | 290472.3 | 319763   | 80638.04 | 323261.7 | 2561570  | 2490936  | 420356   | 1485383  |
| 2316826  | 2442171  | 1551096  | 593006.1 | 2712270  | 1041014  | 1593251  | 4503616  | 4782.421 | 5289586  |
| 11241466 | 6149090  | 1775874  | 798836.3 | 4195886  | 15660977 | 17986458 | 16131719 | 2311523  | 7342833  |
| 14934549 | 20849417 | 2921876  | 2591954  | 3686075  | 27989781 | 207789.9 | 44655358 | 29320661 | 168834   |
| 772013.7 | 514201.4 | 91590.04 | 138222.9 | 919881.2 | 3286885  | 1670285  | 881357.8 | 80928.04 | 449904.2 |
| 708679.1 | 533354.3 | 96657.06 | 51463.38 | 156574   | 833680.1 | 1241621  | 755881.4 | 109709.5 | 404344.6 |
| 7866390  | 3941630  | 2590992  | 3587738  | 15149979 | 9631924  | 23181975 | 10118993 | 1157502  | 7778042  |
| 192626.5 | 146367.6 | 9703.557 | 4524.109 | 37658.82 | 272177   | 313638.3 | 245601.5 | 11284.94 | 78486.32 |

|          |          |          |          |          |          |          |          |          |          |
|----------|----------|----------|----------|----------|----------|----------|----------|----------|----------|
| 679049.1 | 391402.8 | 69064.24 | 31920.03 | 62732.91 | 1598557  | 425739.3 | 1026117  | 230929.8 | 533284   |
| 160916.9 | 113057.1 | 25987.09 | 46144.79 | 47897.68 | 86549.75 | 334344   | 194466.7 | 30729.4  | 73866.65 |
| 149001.7 | 143633   | 17165.06 | 5578.345 | 24354.05 | 230087.3 | 190285.5 | 44895.64 | 17514.57 | 157037.6 |
| 172929.3 | 111914   | 0        | 0        | 2718.316 | 91647.45 | 431612.7 | 237269.4 | 36706.25 | 126003.1 |
| 273054.9 | 158244.9 | 171277.3 | 251631   | 218531.7 | 624558.6 | 487516.8 | 398925.2 | 123472.7 | 78635.19 |
| 675884.6 | 492936.1 | 52953.87 | 5369.318 | 160908.3 | 211462.1 | 1637899  | 1264063  | 294264.2 | 897825.1 |
| 742736.2 | 430932.8 | 161737.3 | 77441.54 | 331491.3 | 480049.7 | 1534310  | 1189316  | 149573   | 455971.3 |
| 841922.4 | 743676.3 | 9121.639 | 6506.103 | 64960.49 | 1056796  | 1497712  | 1185680  | 113484.5 | 641112.2 |
| 16698946 | 18396390 | 5726520  | 3773698  | 10504232 | 5551669  | 25851310 | 48247126 | 1226340  | 8115947  |
| 352684.2 | 230542.1 | 161018.7 | 158927.5 | 117644.5 | 242067.8 | 611408.4 | 515041.1 | 38030.99 | 177549.3 |
| 516750.4 | 379554.2 | 179007.1 | 161273.1 | 261780.9 | 750799.3 | 522992.2 | 822939.7 | 168519.4 | 245005.1 |
| 29399690 | 42071257 | 1135558  | 957807.9 | 14358981 | 881633.8 | 54768881 | 99679559 | 0        | 6704149  |
| 501354.7 | 374009.4 | 231120.2 | 490593.2 | 644999.5 | 219975.3 | 265583   | 685682.4 | 60660.04 | 210248.1 |
| 11727872 | 7435997  | 145290.3 | 71708.54 | 702763   | 10054056 | 26531085 | 16246827 | 1825425  | 7536746  |
| 483417.6 | 302717.6 | 94066.39 | 57494.07 | 155369.4 | 305915.6 | 1027857  | 858866.3 | 107445.6 | 268783   |
| 2344914  | 1473576  | 344161.5 | 381043   | 1055580  | 3215727  | 3463647  | 2898480  | 453880.2 | 1621825  |
| 116201.4 | 44658.16 | 10439.15 | 13821.31 | 6784.57  | 13689.31 | 312050.5 | 187051.9 | 98364.54 | 120843.2 |
| 1743045  | 1236329  | 3587.879 | 0        | 26459.32 | 144323   | 4751371  | 2591345  | 3214678  | 448185.2 |
| 3324786  | 3591687  | 595914.9 | 797604.4 | 988841.6 | 3805566  | 4188086  | 1948647  | 513531.6 | 1963989  |
| 1026255  | 912606.6 | 0        | 0        | 36975.15 | 3040101  | 7397061  | 1469698  | 28732.86 | 639221.2 |
| 162716.5 | 84336.85 | 54390.33 | 27810.97 | 51961.41 | 241139.5 | 230850.7 | 133416   | 82279.47 | 92535.37 |
| 736280.5 | 669602.7 | 2670.906 | 4079.136 | 24277.18 | 1753664  | 6479782  | 1384177  | 159978.6 | 630271.3 |
| 612051.4 | 536568.4 | 0        | 7776.737 | 4189.672 | 28625.29 | 1631901  | 1363528  | 22496.84 | 181553.6 |
| 1052220  | 689101.7 | 115550   | 136660.4 | 657480.2 | 671698.2 | 2066870  | 1813187  | 574478.8 | 299708.3 |
| 320201.6 | 293606   | 3909.766 | 2063.288 | 6489.186 | 271104.8 | 679183.4 | 794882   | 7276.066 | 179234.9 |
| 1710998  | 553674.1 | 1301775  | 1553410  | 1748018  | 2870217  | 2381636  | 1821803  | 970147.9 | 1330842  |
| 197937.3 | 208160.2 | 46655.15 | 48914.16 | 148830.4 | 79528.71 | 301645.5 | 146555.3 | 7566.93  | 126255.1 |
| 28064639 | 42157121 | 756165.4 | 731385.8 | 14248685 | 875708.4 | 50170968 | 1E+08    | 0        | 6707821  |
| 921391.9 | 227245.8 | 107135   | 89699.32 | 326241.9 | 191831.8 | 2320982  | 1253777  | 695572.8 | 769443.5 |
| 3857787  | 2039876  | 1535975  | 1938269  | 2493152  | 5799058  | 3452190  | 7377936  | 2246702  | 2945627  |
| 126223.5 | 125201.4 | 95740.81 | 40711.81 | 171928   | 482716.6 | 166128.1 | 199493.9 | 4700.111 | 29865.84 |
| 648228.5 | 469346.2 | 243311.3 | 155180.5 | 358089.2 | 5118635  | 825031.1 | 848224.2 | 92796.86 | 271968   |
| 532372   | 490496.5 | 0        | 6810.773 | 0        | 417801.5 | 1161884  | 880393.6 | 91427.67 | 129512.6 |
| 105105.7 | 75063.97 | 23924.71 | 16305.41 | 95898.45 | 490788.2 | 230551.7 | 127141.4 | 23069.8  | 56346.14 |
| 225412.5 | 223968.8 | 68251.45 | 224768.2 | 38577.26 | 212596.2 | 205829.9 | 605500.3 | 53797.02 | 67013.95 |
| 13508382 | 18127498 | 15833759 | 2904302  | 7804533  | 2390950  | 8771185  | 44713614 | 11203383 | 412529   |
| 76826.53 | 60203.02 | 53380.56 | 235586.6 | 143438.8 | 46313.22 | 60611.09 | 21698.42 | 68511.56 | 178754.7 |
| 37057940 | 35077916 | 165204.8 | 191751.5 | 591506.3 | 19489421 | 86623338 | 83186056 | 5483929  | 17239278 |
| 48445255 | 35000582 | 20645374 | 15282235 | 1.03E+08 | 47216411 | 1.72E+08 | 98620416 | 150934.5 | 48982699 |
| 379837   | 92559.88 | 315006.4 | 394022.7 | 410538.8 | 581177.4 | 403530.2 | 325272.9 | 387267.4 | 431215.4 |
| 15614369 | 10786102 | 1433321  | 1145522  | 4267445  | 28433570 | 18038678 | 21794666 | 2017465  | 7489377  |
| 1.03E+08 | 51126240 | 19646596 | 9822082  | 40742978 | 1.49E+08 | 1.6E+08  | 1.45E+08 | 28209204 | 71151675 |
| 1.25E+08 | 1.59E+08 | 456164.1 | 173825.9 | 1371255  | 16508790 | 2.93E+08 | 3.88E+08 | 8576409  | 38157296 |
| 736587.3 | 939840.2 | 4464.802 | 0        | 13812.79 | 110463.6 | 1715557  | 2355657  | 107479.2 | 695595.9 |
| 144621.5 | 46517.7  | 75549.35 | 80561.47 | 138642.7 | 950681   | 90835.86 | 160033.8 | 75885.16 | 155812   |
| 6570642  | 4808301  | 42933.18 | 44508.28 | 245254   | 5908500  | 14503356 | 8234505  | 1022138  | 4094960  |
| 94926.52 | 74359.11 | 14638.44 | 30263.84 | 71829.77 | 134379   | 88099.61 | 95821.04 | 16531.63 | 53306.86 |

|          |          |          |          |          |          |          |          |          |          |
|----------|----------|----------|----------|----------|----------|----------|----------|----------|----------|
| 741260   | 674572.2 | 2572.124 | 8158.498 | 29666.87 | 58853.63 | 1943006  | 988947   | 241689.9 | 680045.9 |
| 1009577  | 930439.6 | 861959.6 | 258194.5 | 434513.1 | 5880677  | 1530864  | 2635245  | 478791.7 | 599802.4 |
| 523337.1 | 348097.1 | 33462.1  | 31168.87 | 11386.22 | 85748.94 | 1385482  | 738847.4 | 822572.7 | 766387.3 |
| 280730.4 | 267908.6 | 2850.832 | 0        | 3847.281 | 1118071  | 1480099  | 398847.4 | 0        | 109736   |
| 6417220  | 9504010  | 2154074  | 314894.7 | 2966745  | 1822076  | 9070431  | 23239756 | 28146.32 | 3834018  |
| 372089.9 | 287051   | 42893.21 | 48465.39 | 53624.99 | 58036.45 | 920365.4 | 654202.1 | 68548.55 | 297585.6 |
| 134315.2 | 100532.9 | 28202.87 | 73273.3  | 60965.78 | 916821.6 | 202675.9 | 156801.4 | 7332.673 | 64933.7  |
| 1851025  | 1559872  | 342405.4 | 294357.7 | 569943.5 | 895681.3 | 3857777  | 598401.1 | 391051.7 | 1757257  |
| 421517   | 322328.2 | 0        | 0        | 28985.44 | 756269.7 | 581096.1 | 535229.9 | 35336.43 | 189254.7 |
| 205042.2 | 216350.1 | 26285.65 | 89120.42 | 116658.6 | 297598.6 | 126437.8 | 78133.74 | 178105.8 | 585416.9 |
| 487150.1 | 326299.2 | 2462.903 | 0        | 3521.739 | 459580   | 6619493  | 806085.7 | 38481.08 | 417455.2 |
| 9679509  | 7817436  | 65411.44 | 3466.1   | 454197.2 | 1423789  | 25574777 | 16978792 | 978643.6 | 5196239  |
| 2232858  | 1481076  | 154818.9 | 101950.6 | 548650.4 | 4178649  | 2626369  | 3030035  | 261174.7 | 1123243  |
| 381391.2 | 244733.4 | 102801   | 70877.4  | 349139.5 | 172361.8 | 680360.4 | 520215.7 | 26939.73 | 249658.5 |
| 154479.3 | 118779.3 | 56300    | 151701.1 | 123912.9 | 508596.9 | 257293.6 | 194867.2 | 33000.97 | 67429.97 |
| 1.26E+08 | 1.1E+08  | 10770699 | 5372733  | 1.06E+08 | 42019801 | 2.4E+08  | 1.8E+08  | 1014756  | 42793401 |
| 84023.75 | 100413.3 | 69593.64 | 95751.15 | 516344.4 | 49059.78 | 39266.01 | 257411.3 | 0        | 73314.09 |
| 10755975 | 7136748  | 797448.5 | 358837.7 | 2220456  | 16183022 | 17284705 | 8795152  | 1631254  | 7349382  |
| 180141.6 | 26162.78 | 60747.75 | 66291.67 | 521387   | 124044.1 | 504945.2 | 160903.1 | 159594.7 | 162666.6 |
| 493414.7 | 698270.3 | 3251.684 | 2259.219 | 30384.18 | 166738.4 | 1008436  | 1709894  | 44965.63 | 219487.4 |
| 5018490  | 5375459  | 75764.24 | 5223.944 | 59178.64 | 7125124  | 7629780  | 9137363  | 0        | 467338   |
| 85552.1  | 79145.06 | 23459.61 | 17795.49 | 68019.44 | 478796.9 | 162355.8 | 47717.99 | 6421.625 | 50865.67 |
| 127340.1 | 105150.4 | 22979.5  | 19343.83 | 46159.22 | 61855.38 | 263924.7 | 285446.4 | 5717.135 | 64711.9  |
| 1010393  | 926358.1 | 151542.2 | 23862.29 | 414250.3 | 1618525  | 1099777  | 2036231  | 4675.828 | 48698.34 |
| 2110322  | 1153669  | 323114.5 | 290910.3 | 1218423  | 1006495  | 4518977  | 2613250  | 512275.8 | 1300002  |
| 1771449  | 955630.9 | 429190.4 | 182886   | 840429.7 | 1141278  | 3679626  | 2653142  | 450136.4 | 1166027  |
| 65332.62 | 28686.07 | 0        | 4412.451 | 22170.6  | 178847.2 | 391340.1 | 62710.17 | 67688.45 | 44819.31 |
| 304776.9 | 340348.9 | 105291.6 | 71119.43 | 409444.2 | 1207991  | 601968.1 | 93875.11 | 50134.53 | 148922.5 |
| 185434.8 | 184767.1 | 114899.6 | 203714.9 | 250569   | 263692.9 | 424687.8 | 190961.6 | 101034.2 | 73410.27 |
| 2598520  | 1476527  | 865438.5 | 874959.1 | 1880926  | 2622377  | 3820732  | 4162238  | 719649.1 | 1647346  |
| 119870.6 | 64672.58 | 37473.22 | 52752.75 | 49325.13 | 650593.6 | 231977   | 39424.31 | 110646.1 | 124475.7 |
| 955321.6 | 817685.1 | 322039.6 | 158216.8 | 889364.7 | 6983242  | 1089355  | 1407905  | 65953.82 | 412777.1 |
| 443477.3 | 265218.9 | 60031.73 | 33774.03 | 176474.2 | 119815.4 | 1054920  | 666919.3 | 163727.8 | 186296   |
| 2026329  | 1115831  | 270041.1 | 112568.7 | 779073.9 | 2819558  | 3317789  | 2771811  | 485782.2 | 1428414  |
| 238039.8 | 246355.4 | 213871.1 | 317795.3 | 1274264  | 130195.6 | 98103.64 | 643461.9 | 0        | 194789.2 |
| 748301.2 | 263000.2 | 575559.2 | 577300.6 | 571174.3 | 877026.5 | 689453.1 | 916966.6 | 314534.6 | 757349.7 |
| 1823999  | 705487.7 | 774636.8 | 549873   | 1003389  | 4772484  | 6350904  | 2412616  | 962658.3 | 2660168  |
| 819617.7 | 549540   | 461543.8 | 173757.7 | 591516.7 | 5073500  | 1087476  | 345881.5 | 774610.4 | 591098.7 |
| 11007947 | 12832698 | 6620.369 | 7417.578 | 0        | 414310.8 | 27760088 | 27438166 | 54144.53 | 4060097  |
| 70662.64 | 28810.43 | 45977.64 | 54366.19 | 53936.29 | 68336.69 | 81552.66 | 71270.44 | 55516.66 | 74461.15 |
| 219897.7 | 156410.8 | 19678.67 | 2558.85  | 191567.1 | 9876.183 | 483903.6 | 315529.1 | 9082.143 | 122858.9 |
| 2409094  | 1968047  | 32464.35 | 16261.07 | 276145.6 | 2237064  | 5056891  | 4952727  | 885046.7 | 2181970  |
| 184303.2 | 173434.1 | 66226.5  | 80098.22 | 338776.3 | 122907.9 | 937302.9 | 464003.4 | 21265.81 | 100449   |
| 4247545  | 2844005  | 504414.1 | 327275.6 | 1148047  | 7896111  | 4782796  | 6602892  | 621729.9 | 2154176  |
| 640016   | 864230.4 | 273093.6 | 680348   | 387351.1 | 293122   | 183616.1 | 307092.4 | 22400.84 | 663803.3 |
| 784980.7 | 768120.1 | 119885.1 | 33374.13 | 253834.4 | 343076.5 | 1646816  | 1676979  | 167343.4 | 211905.8 |
| 2411830  | 1697558  | 147110.8 | 86495.92 | 569012.2 | 4558569  | 2778075  | 3517906  | 229352.8 | 942377.4 |

|          |          |          |          |          |          |          |          |          |          |
|----------|----------|----------|----------|----------|----------|----------|----------|----------|----------|
| 178247.2 | 161338   | 5913.737 | 0        | 27947.92 | 947807.3 | 635555.9 | 428991.6 | 0        | 85001.1  |
| 608418.6 | 438062.9 | 272631.5 | 157309.5 | 203312   | 6291747  | 401955.8 | 338373.2 | 216071   | 361432.3 |
| 2318292  | 552926.6 | 1830914  | 2688937  | 2050490  | 1613905  | 2355964  | 3136398  | 1657991  | 2031200  |
| 391774   | 365975.2 | 98810.44 | 1275093  | 786647   | 504616   | 198962.4 | 138365.5 | 240729.7 | 1032817  |
| 231368.2 | 170220.4 | 147212.5 | 161286.2 | 185837.8 | 567212.2 | 492905.9 | 44571.21 | 126588.6 | 166571.8 |
| 386653.2 | 279696.5 | 106343.3 | 86707.16 | 230718.5 | 1694928  | 981037.7 | 303420.1 | 82266.77 | 185993.6 |
| 5500423  | 5417396  | 988888.1 | 1282833  | 1570416  | 6527738  | 7587772  | 3985245  | 781315.3 | 3227385  |
| 2706401  | 1801085  | 510668.3 | 420103.6 | 1233657  | 2923974  | 4617716  | 4420624  | 488856.9 | 1326798  |
| 291269   | 211220.6 | 52783.2  | 72895.92 | 186436   | 1752408  | 548019.1 | 277636.8 | 74088    | 126969.8 |
| 4.04E+08 | 1.97E+08 | 77840157 | 40754192 | 1.63E+08 | 5.94E+08 | 6.21E+08 | 5.63E+08 | 1.13E+08 | 2.86E+08 |
| 611422.2 | 497659.9 | 23592.06 | 66320.32 | 463718.6 | 918797.7 | 642456.2 | 823377.9 | 17260.14 | 137336.4 |
| 66994735 | 90315363 | 7501.974 | 4370.412 | 0        | 36080023 | 1.36E+08 | 2.11E+08 | 246050.8 | 5741923  |
| 2802737  | 1504011  | 479978.6 | 215420.4 | 1015139  | 3925690  | 4560735  | 4246898  | 647322.3 | 1849507  |
| 551384   | 426698.7 | 386531.7 | 506335.8 | 499876.5 | 1762872  | 667503   | 1176937  | 134660.8 | 258694.5 |
| 10907108 | 12320277 | 8633476  | 2606617  | 4115426  | 15734763 | 71733814 | 8524424  | 0        | 1594119  |
| 2093490  | 1634115  | 0        | 0        | 508400.7 | 3537457  | 2897778  | 4423123  | 382290.7 | 715069   |
| 92414.5  | 63755.28 | 42101.44 | 43803.52 | 63774.87 | 263771.5 | 243991.7 | 71768.17 | 30249.17 | 44808.63 |
| 1750695  | 1258718  | 95075.67 | 133958.8 | 5815198  | 1508416  | 6232040  | 1499051  | 230890.8 | 966890.7 |
| 1500858  | 1211304  | 148028.2 | 137747.5 | 354651.1 | 3122540  | 1123780  | 2095178  | 94339.05 | 413344.9 |
| 326026.6 | 393382   | 0        | 0        | 170531.4 | 2907683  | 554743.5 | 173455.1 | 0        | 0        |
| 992559.8 | 817527   | 98063.44 | 53163.6  | 74673.85 | 1580160  | 1457276  | 1506694  | 96253.84 | 660318.6 |
| 2905824  | 3124397  | 125396.1 | 101775.5 | 102960.6 | 456516.3 | 7156432  | 7933303  | 2214756  | 38954.77 |
| 5853064  | 8107835  | 45773.62 | 18101.65 | 146168.6 | 3319120  | 11439860 | 19964371 | 592055.8 | 2820344  |
| 3363264  | 1517575  | 697319.6 | 283700.9 | 505523.7 | 7712333  | 2341453  | 5187135  | 1493335  | 2346399  |
| 583383   | 173579.8 | 111605.4 | 45323.74 | 214670.4 | 901355.2 | 926257.4 | 799985.5 | 352606.8 | 704200.1 |
| 1550046  | 1784759  | 862137.1 | 1119624  | 1060327  | 1236404  | 675159.7 | 665676.7 | 572089.7 | 669142.4 |
| 4013832  | 5848889  | 4617091  | 5415050  | 17703681 | 746152.1 | 4573518  | 14318764 | 26868.24 | 2849935  |
| 9845459  | 6384378  | 846794.9 | 273856.8 | 3070346  | 19988120 | 9455942  | 13499168 | 821799.6 | 5652220  |
| 140215   | 132306   | 29130.62 | 2934.275 | 72243.36 | 151778.2 | 208428.2 | 86758.7  | 5128.276 | 46504.57 |
| 1816165  | 1584307  | 782795.4 | 518320.8 | 4982807  | 1196034  | 6284668  | 1226451  | 59178.78 | 4188402  |
| 375897.2 | 371280.4 | 6351.45  | 9765.193 | 203181.8 | 294095.3 | 676183.5 | 555965.7 | 35805.15 | 363678.8 |
| 376387.2 | 417813.5 | 170525.1 | 102240   | 556636.8 | 1298995  | 702837.8 | 336628.7 | 25078.56 | 77292.65 |
| 1849737  | 1457991  | 44716.14 | 0        | 2869.751 | 118455.6 | 5067128  | 3339096  | 1391529  | 3391715  |
| 420417.3 | 682543   | 169872.9 | 168555.3 | 297583   | 209898.8 | 191932.9 | 264602.9 | 0        | 137618.4 |
| 814624.2 | 1037047  | 5588.349 | 38575.97 | 463804.1 | 7100196  | 1344095  | 455111.2 | 0        | 53581.07 |
| 1049612  | 322117.4 | 639464.7 | 905857.2 | 963858.3 | 1004770  | 1170108  | 1514513  | 753173.1 | 780852   |
| 872651.2 | 384079.9 | 0        | 14997.09 | 140268.5 | 1735000  | 7549119  | 1325116  | 314292.9 | 719925   |
| 10400540 | 22105017 | 5290221  | 4587808  | 6287321  | 611774.3 | 676458.9 | 659899.8 | 49941589 | 288980.8 |
| 3490710  | 3317116  | 441936.7 | 251952.9 | 152629.7 | 1440433  | 8100076  | 8982990  | 1314278  | 2365506  |
| 347481.2 | 387393.2 | 47671.74 | 36490.83 | 12051.63 | 8998.54  | 841158.7 | 999126.6 | 344102.8 | 266592.3 |
| 150827.3 | 158714.8 | 0        | 0        | 5804.951 | 243886.8 | 205393.3 | 46512.25 | 13110.78 | 140237.6 |
| 7496802  | 10856478 | 192786.1 | 13010.1  | 0        | 1192234  | 16549509 | 25890481 | 0        | 2472568  |
| 3921971  | 2831489  | 258314.5 | 154618.1 | 221002.2 | 3910373  | 8276352  | 6040914  | 250908   | 6202539  |
| 5097262  | 6870402  | 54876.21 | 89434.73 | 103570.5 | 2799227  | 10227909 | 17019144 | 615026.6 | 2763446  |
| 3075951  | 1898181  | 397970.6 | 389343.7 | 670099.4 | 6614640  | 2427142  | 4951217  | 809181.9 | 1621626  |
| 965123.5 | 823100.1 | 50966.3  | 18423.59 | 117078.5 | 505799.7 | 2260628  | 2026494  | 219559.1 | 967832.6 |
| 17088085 | 16072105 | 1022301  | 831211.6 | 2812480  | 4719707  | 40954910 | 43715692 | 6314289  | 16673571 |

|          |          |          |          |          |          |          |          |          |          |
|----------|----------|----------|----------|----------|----------|----------|----------|----------|----------|
| 68172173 | 43209495 | 16235246 | 10427411 | 42678284 | 1.18E+08 | 62126238 | 54108031 | 15276289 | 47311283 |
| 1086720  | 1029173  | 0        | 0        | 48244.83 | 550606.9 | 2583952  | 2023162  | 115568.9 | 1048768  |
| 150339   | 106494   | 111796.6 | 34197.58 | 175239.5 | 399063.2 | 300810.7 | 97209.69 | 37410.2  | 89334.78 |
| 308805.2 | 218007.8 | 26297.99 | 4146.639 | 75501.69 | 363652.9 | 579684.6 | 451708.7 | 62310.65 | 119359.9 |
| 948890.5 | 684274.5 | 39024.03 | 18636.3  | 163185.3 | 500565.1 | 2272678  | 1867363  | 63974.76 | 893133.1 |
| 124394.6 | 76891.76 | 15915.77 | 9660.553 | 22664.46 | 279525.6 | 88806.31 | 249170.2 | 49580.1  | 119548.3 |
| 1061841  | 705735.1 | 55625.58 | 86278.43 | 82664.94 | 1092503  | 2224606  | 1309176  | 134437.2 | 724435.6 |
| 241962   | 314187.4 | 23692.28 | 3552.594 | 296582.5 | 322573.7 | 1779020  | 789870.8 | 21559.07 | 103137.7 |
| 335001.8 | 271452.6 | 44202.84 | 146681.6 | 114806.6 | 3278118  | 291761.8 | 125426.5 | 101825.9 | 289641   |
| 326652.2 | 196800   | 52544.35 | 18070.16 | 53517.81 | 555898.6 | 468508.7 | 582704   | 239878.1 | 488901.9 |
| 1942460  | 1254755  | 16145.62 | 5640.014 | 128625.7 | 2224956  | 4055656  | 3248641  | 731903.4 | 1851684  |
| 72900.25 | 51885.25 | 18617.36 | 36078.69 | 62704.81 | 439038.1 | 87438.09 | 88884.36 | 0        | 39813.51 |
| 175978   | 149176.1 | 10256.59 | 0        | 6394.634 | 147180   | 385890.8 | 351311.3 | 0        | 82752.67 |
| 6229992  | 4383093  | 528534.1 | 293421.3 | 1560183  | 12164015 | 6628604  | 8827173  | 866285.1 | 2438871  |
| 73674.71 | 49619.73 | 38433.78 | 90195.62 | 161751.7 | 127097.3 | 55648.08 | 102325.3 | 36716.98 | 45467.05 |
| 1219204  | 380907.9 | 914574.6 | 2647961  | 1177239  | 1467424  | 1076125  | 1291558  | 1139172  | 622842.5 |
| 150069.7 | 129401   | 15999.55 | 44121.47 | 67347.57 | 890932.3 | 325683.6 | 217576   | 12878.45 | 75880.18 |
| 1452484  | 837610   | 527553.4 | 346417   | 2235962  | 202863.1 | 2040196  | 2156985  | 1011589  | 606712.6 |
| 46313006 | 36516925 | 1516233  | 696585.9 | 6612005  | 21211966 | 1.13E+08 | 75692501 | 11165453 | 32191889 |
| 670881.8 | 458610.6 | 292854.9 | 241481.2 | 190210.3 | 351839   | 1309663  | 871845.2 | 104475.2 | 364363.9 |
| 5320199  | 4104980  | 360962.4 | 468510.7 | 3081727  | 10124614 | 4125976  | 10162441 | 265478.2 | 1944280  |
| 180992.1 | 145553.8 | 26610.52 | 9903.421 | 76649.6  | 899114.2 | 527925.9 | 150705.6 | 27399.68 | 70386.67 |
| 495508.6 | 590612.6 | 0        | 3798.657 | 257133.1 | 4013673  | 938269.9 | 371774.3 | 0        | 0        |
| 17987197 | 12454404 | 1593361  | 1282365  | 4753228  | 33594770 | 20738433 | 25838990 | 2239023  | 8495433  |
| 470152   | 335007.7 | 56236.26 | 24752.54 | 95462.56 | 506907.7 | 913858.5 | 520608.5 | 80675.71 | 447973.4 |
| 50555.44 | 30831.49 | 33790.79 | 15637.62 | 30169.44 | 60465.63 | 303477.4 | 86665.59 | 7008.711 | 67840.76 |
| 725302.7 | 568139.8 | 48592.68 | 0        | 113327.3 | 276102.5 | 1788465  | 1155971  | 182590.2 | 493937.8 |
| 80816.34 | 54677.66 | 16859.11 | 2679.675 | 39520.64 | 424469.1 | 206136.5 | 91088.86 | 5086.116 | 80893.88 |
| 327856.7 | 136532.2 | 120975.4 | 102192.1 | 217349.8 | 933694.6 | 968916.8 | 299605.3 | 117826.5 | 483267.3 |
| 457287   | 592886.6 | 18418.1  | 6662.669 | 96480.13 | 642144.2 | 527637.3 | 162585.5 | 38899.24 | 123490.3 |
| 184296   | 111922.4 | 40378.09 | 4726.189 | 38815.87 | 245202.3 | 323489.1 | 166147.8 | 13737.97 | 172403.6 |
| 595077.1 | 652010.5 | 13190.64 | 0        | 29668.36 | 551296   | 1161041  | 1364780  | 63362.12 | 249167.7 |
| 1326191  | 862748   | 18224.13 | 7821.244 | 56980.16 | 1643033  | 2686879  | 2241476  | 202294.3 | 951748.2 |
| 4278348  | 2784150  | 583207.1 | 525285.7 | 1127564  | 7374546  | 5534719  | 3654039  | 745546.1 | 2792921  |
| 2120582  | 1848360  | 44484.07 | 23583.78 | 223218.1 | 2216748  | 4239691  | 4026157  | 482628.9 | 1375897  |
| 4700841  | 4711727  | 2631939  | 2558504  | 41204004 | 1371042  | 3076006  | 11878406 | 25657.81 | 6793377  |
| 816546.5 | 492539.6 | 75029.24 | 9889.326 | 147907.5 | 1047346  | 1547499  | 818955.3 | 124259.8 | 611811   |
| 1083558  | 713195.6 | 500470.3 | 482306.1 | 638211.8 | 1096789  | 1464918  | 2219447  | 642379.3 | 461553.6 |
| 155918.7 | 113903.3 | 9846.334 | 5612.041 | 46905.84 | 55855.8  | 376024.7 | 132759.9 | 68254.8  | 242931.2 |
| 1633586  | 1094581  | 152701.9 | 77579.68 | 358670   | 2368734  | 2718380  | 1411146  | 249207.6 | 1030552  |
| 30253698 | 22778768 | 4285941  | 3767519  | 17900563 | 74601382 | 1.54E+08 | 61466098 | 2853508  | 14539170 |
| 365109   | 227723.8 | 121386.9 | 76089.84 | 60811.63 | 1302453  | 1343833  | 494245.4 | 47958.48 | 309896.8 |
| 1815570  | 1711655  | 181453.6 | 149281   | 243743.5 | 609319.6 | 4267972  | 4282717  | 663184.1 | 754913.7 |
| 210200.2 | 136982.9 | 80897.11 | 27106.12 | 140285.1 | 38642.5  | 441841.8 | 304870.5 | 0        | 249474   |
| 628333.4 | 471466.6 | 0        | 0        | 10317.68 | 306129.5 | 1593728  | 955220.5 | 87895.62 | 709540.1 |
| 296921.7 | 148849.6 | 38036.95 | 165455   | 235499.3 | 726345.4 | 952668.5 | 225015.4 | 158656.3 | 185713.1 |
| 239612.5 | 356197.2 | 140217.2 | 180586.2 | 42081.59 | 93022.67 | 191163.4 | 874821.2 | 97790.31 | 33930.89 |

|          |          |          |          |          |          |          |          |          |          |
|----------|----------|----------|----------|----------|----------|----------|----------|----------|----------|
| 14455857 | 12112287 | 4031040  | 2403222  | 8599479  | 10784518 | 24492674 | 32483751 | 4089274  | 6555339  |
| 747028.9 | 574752.1 | 495272.6 | 529298.4 | 541851.5 | 498091.1 | 778280.1 | 92495.54 | 1396580  | 1180790  |
| 509467.1 | 520215.1 | 334918.6 | 754813.4 | 2728934  | 375785.6 | 120500.1 | 1403311  | 518969.3 | 292108.2 |
| 844851.5 | 592966.8 | 183562.1 | 167508.7 | 269383.2 | 203325.3 | 1957901  | 1404948  | 17851.79 | 520790.5 |
| 212123.3 | 200430.9 | 2531.255 | 6331.606 | 6691.419 | 191356.3 | 445989.7 | 524674.2 | 11729.62 | 90115.67 |
| 4548533  | 2854541  | 580951.5 | 587345   | 1294998  | 6366262  | 7450314  | 4752183  | 678400.9 | 2816643  |
| 115029.7 | 87150.94 | 31858.45 | 29225.63 | 117445.7 | 453971.2 | 237316.3 | 161549   | 5019.344 | 64477.54 |
| 15765706 | 12894224 | 492676.9 | 239912.2 | 2182533  | 7154260  | 38351185 | 25305117 | 3763784  | 10990719 |
| 251351.6 | 104519.6 | 126227.3 | 116964   | 112494.7 | 216549   | 432784.6 | 300370.4 | 77934.38 | 230044.1 |
| 954881.3 | 842941.5 | 12328.1  | 6493.28  | 678801.2 | 63518.36 | 2177016  | 988856.4 | 65386.62 | 580720.5 |
| 2067492  | 1792808  | 123015.8 | 40731.77 | 214643.2 | 828773.5 | 5044562  | 3842148  | 494855.2 | 1343087  |
| 300722.1 | 215715.7 | 68130.3  | 42503.93 | 95829.22 | 1804275  | 678193.6 | 299539.1 | 30096.47 | 228402.2 |
| 179843.3 | 153274.7 | 5731.277 | 8731.598 | 13938.85 | 174316.8 | 372415.6 | 259544.4 | 13066.34 | 178300.4 |
| 113209.3 | 48523.06 | 123722.1 | 139291.8 | 123138.5 | 44288.1  | 34496.74 | 87603.45 | 72220.44 | 81111.51 |
| 705907.6 | 656204.8 | 30729.48 | 75144.56 | 208730.2 | 292773.6 | 1578266  | 1754719  | 163101.3 | 392562   |
| 473021.2 | 257976.3 | 14268.36 | 14078.95 | 111012.6 | 322030   | 1117612  | 667625   | 114269.1 | 291728.1 |
| 1108196  | 1076467  | 11417.16 | 7756.993 | 22644.7  | 223874.6 | 2862637  | 1948418  | 325340.1 | 711593.1 |
| 330105.6 | 225102.1 | 82826.72 | 84945.55 | 280735.3 | 1029091  | 939868.3 | 353319.7 | 93589.32 | 119608.8 |
| 1.61E+08 | 1.62E+08 | 2122567  | 502318.9 | 2692151  | 82476558 | 3.81E+08 | 4.08E+08 | 17067081 | 67851757 |
| 132370.6 | 94210.61 | 4981.81  | 7309.858 | 3018.77  | 247899.6 | 179510.3 | 249468.9 | 8755.678 | 88723.54 |
| 447566.2 | 418407.6 | 109711   | 135572.8 | 433518.7 | 1142682  | 1536466  | 543855.2 | 29333.68 | 138977.5 |
| 82583.71 | 70287.88 | 12287.61 | 10337.53 | 61831.49 | 418985   | 187421.6 | 61719.12 | 5641.399 | 35763.6  |
| 3819094  | 3240970  | 106200.2 | 66249.54 | 374805.8 | 2268126  | 8981812  | 8281996  | 178673.9 | 1326847  |
| 1193845  | 292028.3 | 841329.3 | 978472.1 | 1328170  | 1308252  | 2697432  | 1582520  | 880084.3 | 945115.3 |
| 257764.4 | 110044.8 | 52516.23 | 80271.39 | 102830.7 | 460411.7 | 290259.9 | 258080.4 | 76469.21 | 263046   |
| 8223606  | 6842292  | 970519.3 | 814330   | 23014720 | 6109655  | 34926209 | 8364503  | 3303195  | 867261.7 |
| 658563.5 | 443409.6 | 160829.5 | 52196.83 | 669739.3 | 411945.5 | 1105732  | 1105792  | 58245.91 | 328764.6 |
| 352452.1 | 125389   | 601002.8 | 862204   | 34893.84 | 510887.6 | 262264.1 | 315718.2 | 567107.8 | 349318.7 |
| 4260265  | 5228741  | 2245204  | 3317251  | 665044   | 3663856  | 3310568  | 13588839 | 1965609  | 1398910  |
| 172649.7 | 67361.57 | 171863.8 | 73914.58 | 211804   | 477483.1 | 174531.1 | 256507.8 | 97154.69 | 197546.3 |
| 2249897  | 1924863  | 17353.13 | 9268.497 | 38825    | 6278800  | 15508276 | 3467236  | 50633.1  | 1409210  |
| 1178607  | 888200.7 | 0        | 5656.61  | 307100.3 | 2438572  | 1152319  | 2276958  | 75085.37 | 482058   |
| 271724.1 | 180782.3 | 22370.57 | 14102.47 | 26035.61 | 64551.17 | 711444.2 | 357036.6 | 101754.7 | 123645.8 |
| 230566.8 | 182516.3 | 7646.515 | 15503.46 | 115685   | 1493428  | 503697.9 | 314293.7 | 0        | 74785    |
| 262993.1 | 102159.4 | 153678.9 | 210664.6 | 191216.5 | 330907.9 | 249493.8 | 305643.1 | 143612.4 | 166878.7 |
| 820365.7 | 596847.3 | 175056.2 | 61606.64 | 108337.1 | 212542   | 2032259  | 1548371  | 348569.5 | 1122627  |
| 17400856 | 12122175 | 1644870  | 1199279  | 4490926  | 33204692 | 19556941 | 25582546 | 2399302  | 8205988  |
| 409358.7 | 641593.6 | 3438.207 | 0        | 24791.02 | 1413464  | 2532016  | 229124.2 | 5418.922 | 80029.07 |
| 460831.8 | 304551.3 | 85643.64 | 16584.27 | 158103.3 | 748578.4 | 636262.5 | 587373.8 | 117464.2 | 200963.7 |
| 9302686  | 5348459  | 2622984  | 3174980  | 4844448  | 40999582 | 20915196 | 7516805  | 2197015  | 7613987  |
| 1841545  | 821991.9 | 246370.9 | 122389.9 | 442624.2 | 3243607  | 2661422  | 1796711  | 1103325  | 1097707  |
| 1.72E+08 | 1.27E+08 | 25288433 | 23473032 | 1.03E+08 | 4.17E+08 | 8.56E+08 | 3.45E+08 | 19283815 | 84651554 |
| 8944000  | 9427461  | 1929292  | 2046343  | 1834022  | 7073019  | 15584360 | 25407364 | 2443627  | 3157993  |
| 8734477  | 6136796  | 3106335  | 9861740  | 1020602  | 9676185  | 53700149 | 17986502 | 9277453  | 961319.1 |
| 1170603  | 772890.4 | 21120.89 | 2659.906 | 342476.4 | 1067942  | 2519055  | 1951586  | 493926.4 | 1203173  |
| 770825   | 584616.5 | 1394838  | 1631533  | 514440.3 | 723321   | 692746.1 | 1727769  | 778807.3 | 242457.5 |
| 382891.5 | 374239.9 | 3443.533 | 0        | 6424.021 | 385037.3 | 782231.7 | 521176.5 | 26672.88 | 388597.7 |

|          |          |          |          |          |          |          |          |          |          |
|----------|----------|----------|----------|----------|----------|----------|----------|----------|----------|
| 7172706  | 9527708  | 3623629  | 988999.3 | 8704121  | 2468338  | 5236415  | 10090875 | 48357.51 | 69987.58 |
| 3102142  | 1956282  | 222368.4 | 216711.1 | 762521.8 | 5455456  | 4272019  | 3852316  | 408061   | 1713332  |
| 1347124  | 1226984  | 19348.34 | 55805.92 | 389058.4 | 448346.1 | 3198399  | 1930730  | 0        | 36962.02 |
| 700171.8 | 493637   | 86937.41 | 103538.2 | 144120.3 | 1281543  | 827804.6 | 852235.2 | 62275.05 | 386111.3 |
| 3844779  | 3705175  | 114988.3 | 62575.6  | 44436.28 | 583109   | 10084987 | 10161955 | 2457177  | 3404999  |
| 598573.4 | 265624.6 | 58634.17 | 31773.58 | 39703.07 | 1540375  | 285679.1 | 943011.3 | 299911.6 | 442825   |
| 2324414  | 1787506  | 448580.1 | 385658.4 | 468556.1 | 3321357  | 3507494  | 3365731  | 521306.3 | 1688190  |
| 273830   | 219639.4 | 32848.29 | 35895.3  | 49107.32 | 96022.93 | 653482.7 | 396274.6 | 107856.5 | 102547.7 |
| 53738.36 | 52475.07 | 67278.48 | 8884.26  | 47438.23 | 229651.6 | 60795.22 | 62207.92 | 5230.043 | 6853.089 |
| 172201.1 | 105048.3 | 11678.39 | 20472.08 | 66695.3  | 73936.51 | 405279.3 | 233616.4 | 11521.66 | 136785.5 |
| 205160.4 | 173479.8 | 43896.95 | 36370.54 | 76991.42 | 109311.7 | 419066.5 | 173401.2 | 25958.39 | 82586.44 |
| 1016544  | 736556.5 | 279456.1 | 206814.5 | 970767.9 | 640321   | 1631029  | 699071.5 | 253754   | 563637.5 |
| 265063   | 291668.9 | 138938.3 | 216528.3 | 164574.8 | 185047.7 | 180032.2 | 281852.5 | 140882.9 | 85979.4  |
| 1324891  | 1497341  | 923915.1 | 378954.2 | 2200520  | 387955.3 | 251777.4 | 3990699  | 661251   | 500480.1 |
| 738907.1 | 680551.7 | 33387.03 | 16814.1  | 79503.05 | 152901.7 | 1884692  | 1335856  | 126814.3 | 524335.5 |
| 715439.2 | 339914.8 | 210130.1 | 139855.3 | 425553.7 | 559596.9 | 1374221  | 1032902  | 222211.1 | 509945.9 |
| 2691736  | 1573566  | 299101.8 | 224449.9 | 366878.2 | 465532.8 | 7120693  | 4741279  | 1415694  | 3027989  |
| 713113.5 | 596523.9 | 90312.5  | 100093.5 | 71960.63 | 635171.9 | 1454031  | 1449573  | 210405.1 | 549128.5 |
| 1021874  | 891403.9 | 0        | 20470.65 | 48204.8  | 89950.02 | 2770430  | 1581781  | 316992.4 | 849582.5 |
| 13606937 | 11810192 | 164957.7 | 98991.67 | 1212887  | 9805321  | 31187981 | 29221349 | 287377.6 | 8867328  |
| 3773880  | 2993564  | 55542.79 | 314512.5 | 2122155  | 7210538  | 3190573  | 7711180  | 424484.1 | 1285096  |
| 439802   | 348854   | 34200.64 | 72338.92 | 158983.7 | 745382.3 | 517057.1 | 992395.9 | 69128.42 | 259807.3 |
| 19864822 | 18530892 | 22379302 | 12868169 | 56895337 | 7055762  | 39699094 | 49063680 | 629258.2 | 25406916 |
| 133515.9 | 174704   | 97332.02 | 148466.3 | 222444.7 | 500412.5 | 55083.05 | 123075.9 | 10390.98 | 24722.19 |
| 1111495  | 633278.5 | 311265.7 | 174073   | 473511.7 | 2332720  | 705690.4 | 804978.8 | 683831.7 | 570766.5 |
| 1743007  | 1015461  | 745669   | 840838.2 | 1617423  | 6934578  | 2620474  | 2357625  | 388521.2 | 1030558  |
| 1220802  | 1263318  | 127986.4 | 21316.02 | 455201.6 | 2041753  | 1258514  | 2759569  | 192261   | 117070.3 |
| 733782.5 | 574796   | 45992.94 | 21235.28 | 134680   | 1266039  | 1014718  | 738618.9 | 124001.2 | 360901.1 |
| 2983479  | 2036852  | 818687   | 715063.6 | 2100032  | 3721897  | 3902329  | 1551551  | 580501.8 | 2658155  |
| 1764033  | 1037789  | 262841.9 | 125612.8 | 924341.4 | 3416579  | 1654845  | 2398000  | 370176.3 | 935846.7 |
| 1.03E+08 | 1.38E+08 | 78115.33 | 20981.09 | 81316.12 | 48619020 | 2.22E+08 | 3.25E+08 | 107255.2 | 11277436 |
| 689181.1 | 471781.1 | 0        | 2320.225 | 0        | 619019.4 | 1606196  | 898629   | 113398.1 | 400178.9 |
| 445353.6 | 242245.1 | 124869.4 | 156488.1 | 307615.7 | 2050779  | 834096.9 | 555683.9 | 98927.2  | 292414.4 |
| 1441473  | 538090.4 | 1005039  | 976771.1 | 1578639  | 3416865  | 1871136  | 1623069  | 851288.9 | 903516.5 |
| 7669701  | 6689552  | 945050.8 | 140080.7 | 1105350  | 1824766  | 19221655 | 17165036 | 2494112  | 5332754  |
| 162214.4 | 128695.2 | 0        | 0        | 0        | 194154.8 | 332008.1 | 369050.3 | 14632.64 | 123945   |
| 593595.9 | 403482   | 39280.62 | 18111.24 | 159613.2 | 1015577  | 842837.9 | 633368.7 | 65439.19 | 361470.4 |
| 603792.4 | 881022.6 | 316983.3 | 228450.7 | 17630.53 | 193978.4 | 885509.4 | 2072795  | 0        | 0        |
| 924284   | 993854.4 | 2290.427 | 21880.61 | 969926.4 | 405534.4 | 1515517  | 2558620  | 9457.226 | 287773.9 |
| 1105694  | 889891.5 | 2861.675 | 9295.583 | 34685.78 | 3091578  | 7257273  | 1708923  | 16905.39 | 750210.9 |
| 346713.5 | 321377.5 | 428280.3 | 551521.1 | 495789.4 | 554468.3 | 213601.2 | 240604.7 | 260935.8 | 104586.2 |
| 15256859 | 17876257 | 19415416 | 9938917  | 42425841 | 6986674  | 30553374 | 44058226 | 878608.3 | 19998747 |
| 612247   | 220848.1 | 300307.1 | 816645.7 | 676369.1 | 462040   | 365531.6 | 382789.5 | 755136.3 | 907464.4 |
| 58730.65 | 50855.97 | 33202.99 | 30506.89 | 39149.7  | 209714.5 | 114186.7 | 54885.89 | 0        | 20064.01 |
| 1489137  | 1013143  | 321756.1 | 162980.4 | 1124786  | 6549017  | 3508883  | 1212154  | 259892.2 | 912408.1 |
| 330736   | 353031.5 | 3370.858 | 6483.104 | 0        | 27358.88 | 871909.9 | 372938.8 | 49318.76 | 333533.8 |
| 2809438  | 3547938  | 706259.3 | 902053.7 | 921244.3 | 2653068  | 3377527  | 9099727  | 940913.1 | 804202.5 |

|          |          |          |          |          |          |          |          |          |          |
|----------|----------|----------|----------|----------|----------|----------|----------|----------|----------|
| 1587204  | 1165163  | 122383.1 | 185826.7 | 236817.6 | 5274774  | 7500165  | 1942148  | 243677.2 | 550309.3 |
| 3776781  | 683336.5 | 2240325  | 3455347  | 3281164  | 4840896  | 3423010  | 4040225  | 3246381  | 3356892  |
| 449738.5 | 280785.8 | 88877.03 | 38912.31 | 186234.4 | 397580.8 | 897507.6 | 574382.6 | 82648.14 | 219278.5 |
| 732401.1 | 497084.9 | 179644.9 | 79265.95 | 322712.9 | 3827196  | 1705676  | 669311   | 101947.3 | 430970.6 |
| 48246903 | 53670737 | 474673.6 | 690495.8 | 872532.7 | 46686844 | 95294268 | 70067176 | 17346.96 | 19580186 |
| 1478398  | 810148.6 | 1443312  | 840911.6 | 1346889  | 4327299  | 1723080  | 1020392  | 1797480  | 586428.8 |
| 16173968 | 10455592 | 4690409  | 2326124  | 8360296  | 12334754 | 31116935 | 16497628 | 3385662  | 10585390 |
| 559557.1 | 331995.7 | 79434.75 | 16702.99 | 71545.34 | 634620.2 | 1147602  | 626726.7 | 126970.8 | 329550.4 |
| 260428.8 | 178449.7 | 105450.3 | 83989.89 | 183962.6 | 857008.4 | 640570.4 | 374718.5 | 43018.52 | 162395.3 |
| 109548.8 | 74717.05 | 110245.8 | 102600.6 | 32553.49 | 264005.7 | 206221.5 | 136271.3 | 36155.62 | 61088.71 |
| 17871420 | 26177195 | 18520.44 | 12403.52 | 2087930  | 2197040  | 40117254 | 62646702 | 56050.09 | 4482315  |
| 108007.2 | 89250.39 | 20966.08 | 28499.41 | 52301.27 | 71438.93 | 202448.1 | 110779.3 | 22846.56 | 87243.47 |
| 77556.79 | 31873.38 | 68340.02 | 104170.5 | 59222.3  | 223399.6 | 46494.48 | 59346.32 | 41281.58 | 68747.96 |
| 5584708  | 4807653  | 137303.7 | 67637.75 | 699853.6 | 2108268  | 14016440 | 9262976  | 1105959  | 3759096  |
| 822904.1 | 678944.4 | 149275.2 | 251653   | 200229.4 | 471923   | 1706246  | 1220822  | 60648.35 | 104749.2 |
| 9856934  | 7683217  | 3389310  | 1603736  | 9271942  | 59485784 | 12292774 | 14792932 | 908824.3 | 4911325  |
| 174428.5 | 198936.1 | 19715.97 | 17611.11 | 18401.82 | 315760   | 160791.3 | 246641.1 | 0        | 30412.38 |
| 2405458  | 2095601  | 58941.69 | 52522.55 | 77098.02 | 3907229  | 3770033  | 4819595  | 247314   | 1272563  |
| 1021702  | 503502.8 | 701234.2 | 2848792  | 1783609  | 843615.9 | 506808   | 585388   | 696168.9 | 1854580  |
| 498177.3 | 259712.6 | 97634.82 | 123580.8 | 129357.8 | 309236.9 | 1112580  | 655451.6 | 75248.38 | 438599.3 |
| 3841603  | 4297734  | 187455.7 | 183268.4 | 1477608  | 2069959  | 44413535 | 11167834 | 0        | 2487739  |
| 349792   | 291830.5 | 209373.4 | 138193.8 | 248808.4 | 1959767  | 385570.8 | 583379.2 | 80508.67 | 65518.44 |
| 1682746  | 1141643  | 119881.3 | 92455.12 | 356503.4 | 2619659  | 2717641  | 1283205  | 259973.9 | 1180219  |
| 157277.2 | 248275.6 | 13015.5  | 6603.472 | 30268.6  | 218432.5 | 135122.3 | 56196.6  | 36077.35 | 15914.51 |
| 184199.6 | 174239.6 | 47009.45 | 5716.677 | 137824.3 | 219776.6 | 224950.3 | 469748.8 | 199113.5 | 161158.1 |
| 152788.2 | 83835.12 | 2667.531 | 6692.624 | 75732.25 | 268462.8 | 203684.7 | 213189.6 | 29609.76 | 100972.8 |
| 1041637  | 686036.1 | 287806.4 | 147198.4 | 959487.2 | 594427.2 | 1856536  | 993837.6 | 212197.5 | 544202   |
| 851208.8 | 781490.9 | 310254.9 | 128998.9 | 1077004  | 1405357  | 3604412  | 2171835  | 427728.6 | 859812.3 |
| 418238.9 | 308652.1 | 114226.2 | 127748.7 | 164473.7 | 537384.2 | 597273.1 | 459988.2 | 95225.8  | 120498.4 |
| 128722.8 | 56670.43 | 0        | 0        | 9358.83  | 0        | 377853.7 | 189603.7 | 171077.2 | 119205.2 |
| 20145292 | 17958933 | 4498562  | 1697693  | 1444212  | 3115507  | 50576312 | 50458027 | 9863120  | 15055896 |
| 333273.3 | 171971   | 95111.35 | 152824.7 | 301651.3 | 405658.9 | 397662.1 | 554933.8 | 177683.9 | 371762.4 |
| 858550.6 | 641381.2 | 19463.14 | 9402.029 | 35414.68 | 1350214  | 1476449  | 1442137  | 45185.6  | 533831.8 |
| 1445153  | 802813.5 | 159846   | 134156   | 599192.8 | 445220.5 | 3537843  | 1960997  | 548166.9 | 595481.7 |
| 1732195  | 1456626  | 128623.3 | 62212.99 | 117432.1 | 151689.8 | 4672986  | 3914059  | 828234.4 | 2168526  |
| 6691468  | 9789212  | 3583.546 | 71166.07 | 21236.07 | 799743.4 | 15680295 | 429996.9 | 199355.3 | 10170396 |
| 419853.1 | 194238.6 | 190545.9 | 218529.4 | 329220.5 | 459064.4 | 552898.6 | 602050.9 | 174433.5 | 258501.4 |
| 4220048  | 2853351  | 966706.8 | 801516.6 | 3949274  | 1819363  | 7825342  | 3778183  | 1174013  | 2006794  |
| 1024256  | 1469098  | 14556.87 | 0        | 352202.3 | 1125903  | 1342345  | 957450.3 | 0        | 108240.7 |
| 2087133  | 1709595  | 474760.9 | 447981.2 | 766075.5 | 3762949  | 1874662  | 4963918  | 1077299  | 795808.8 |
| 621896.6 | 400578.6 | 86515.13 | 172493.6 | 311538.6 | 1072090  | 667135.6 | 1282303  | 237801.3 | 384293.7 |
| 165126.5 | 165610.1 | 9276.599 | 0        | 56218.05 | 227598.9 | 245154.7 | 208102.9 | 0        | 53583.97 |
| 1967373  | 1071506  | 1552044  | 3098812  | 1043599  | 4789712  | 1939975  | 3275277  | 809924.6 | 933572.4 |
| 1376702  | 755806   | 278869.5 | 135983.3 | 638570.5 | 1986490  | 2135081  | 1574246  | 357579.1 | 931009.5 |
| 169584.1 | 107767.3 | 191533.7 | 208103.1 | 69556.53 | 269613.6 | 306239   | 162213.1 | 115122.6 | 38914.64 |
| 190198.4 | 163005.2 | 0        | 7918.935 | 3742.722 | 39941.79 | 511362.7 | 339726.2 | 11176.27 | 117811.9 |
| 14855085 | 8820192  | 1839780  | 1806636  | 4180996  | 20098707 | 26092627 | 14615842 | 2406933  | 10842147 |



|          |          |          |          |          |          |          |          |          |          |
|----------|----------|----------|----------|----------|----------|----------|----------|----------|----------|
| 2971665  | 3040081  | 1059900  | 558472.3 | 1310522  | 1498251  | 5359572  | 7884732  | 92593.87 | 854305   |
| 323035.4 | 463328.2 | 0        | 0        | 4525.817 | 12141.21 | 785840.4 | 1137496  | 105993.3 | 259355.1 |
| 302035.2 | 244629.7 | 153837.3 | 219157.4 | 187862.7 | 213267.7 | 366249.4 | 646283.7 | 56995.6  | 143752.5 |
| 264647.9 | 189405.2 | 0        | 0        | 5158.91  | 109119.2 | 703456.8 | 431502.4 | 36876.18 | 435023   |
| 245242.3 | 249422   | 96045.45 | 58404.51 | 164244.5 | 144354.7 | 370186   | 499355.1 | 48899.22 | 134722.7 |
| 3990669  | 2243741  | 1092441  | 704067.5 | 1444278  | 8727156  | 2350351  | 3185915  | 2598924  | 1671005  |
| 4355405  | 1010381  | 3049835  | 4237010  | 3668779  | 5265849  | 3732923  | 3109802  | 3590865  | 5612105  |
| 386149.9 | 332396.5 | 106410.1 | 138871.5 | 174335.7 | 522161.9 | 448478.5 | 387395.3 | 71727.2  | 139929.1 |
| 122407.6 | 140663.3 | 0        | 2657.496 | 18598.84 | 237154   | 110766.4 | 78467.52 | 14977.86 | 59370.99 |
| 3058807  | 1456479  | 6109419  | 6947044  | 5847364  | 661555   | 616221.2 | 4991011  | 1899918  | 2374154  |
| 3961391  | 2891366  | 332404.1 | 201100.9 | 812162   | 7301108  | 5102867  | 5425865  | 624728.7 | 1333061  |
| 2092557  | 1516880  | 425677   | 229092.7 | 1246544  | 11321385 | 4252599  | 2135254  | 256245.5 | 976344.9 |
| 6611453  | 4767890  | 1310075  | 2397932  | 3389094  | 10157321 | 7380397  | 14546392 | 2567201  | 4105239  |
| 1195672  | 860387.3 | 373562.8 | 290058.4 | 433370.9 | 270251.8 | 2709410  | 2119157  | 296394.4 | 565582.1 |
| 273385.2 | 243773.1 | 164178.6 | 107478.2 | 295313.6 | 285712.2 | 1276864  | 137481.3 | 136581   | 703331.8 |
| 2780454  | 2297786  | 1083747  | 2508004  | 1866150  | 1358668  | 3540653  | 811091.6 | 1355805  | 4263868  |
| 317845.1 | 155248.8 | 175424.1 | 185976.4 | 106100.5 | 527603.5 | 279922.7 | 432955.8 | 163071.9 | 197965   |
| 8443489  | 5662424  | 950625.1 | 684710.4 | 2236581  | 16323932 | 9657581  | 12767618 | 1351265  | 4003689  |
| 4141548  | 2780436  | 291345.1 | 100222.9 | 846180.3 | 6401941  | 6918574  | 3549784  | 572370.8 | 2860125  |
| 101462.7 | 89144.14 | 19855.88 | 5572.248 | 104221.6 | 451328.1 | 213954.9 | 136869.5 | 0        | 29848.68 |
| 6203637  | 3428071  | 390647.1 | 457305.1 | 872693.2 | 2500129  | 16092343 | 10314823 | 3226234  | 5889464  |
| 5208646  | 5252475  | 1236122  | 1164254  | 3999239  | 29462795 | 8571709  | 11975666 | 669132   | 2966968  |
| 54372.98 | 40687.81 | 4310.997 | 0        | 21137.49 | 206249.1 | 203787.5 | 70354.68 | 0        | 23188.99 |
| 1501583  | 1456019  | 11051.43 | 0        | 34171.57 | 1113914  | 3460023  | 2336396  | 319029.1 | 1106245  |
| 416810.2 | 224683.7 | 67774.17 | 100685.1 | 79255.29 | 980248.5 | 225743.6 | 704569.1 | 181210.2 | 252033   |
| 656366.8 | 471750.3 | 27615.51 | 11552.32 | 159040.4 | 458121.7 | 1526773  | 1431335  | 154930.3 | 572111.2 |
| 950623.8 | 768718.2 | 12134.16 | 13282.63 | 10303.92 | 1416787  | 1708425  | 2023769  | 76437.3  | 566636.4 |
| 2108322  | 1839940  | 2366981  | 1166935  | 5935902  | 779914.8 | 4225420  | 4852230  | 178925.5 | 3003177  |
| 562002.8 | 318328.5 | 179962   | 118254.7 | 308400.9 | 2388027  | 1277857  | 850636.7 | 157206.1 | 340896.3 |
| 18653546 | 11517272 | 4461445  | 5346598  | 9155166  | 18842365 | 32638694 | 33582196 | 4374985  | 10842635 |
| 720732.7 | 717794.9 | 24929.42 | 18073.65 | 59956.76 | 769763.4 | 1416162  | 1125432  | 152993.3 | 524959.4 |
| 64176.54 | 44416.89 | 103451.7 | 42725.72 | 173575.4 | 112954.4 | 0        | 71068.86 | 25685.3  | 38486.56 |
| 99018.63 | 73631.93 | 32901.81 | 14264.57 | 101958.6 | 511289.6 | 140471.5 | 165363.4 | 0        | 43827    |
| 494750.1 | 292812.2 | 110211.1 | 156239.2 | 128226.2 | 876687.8 | 578300.3 | 632864.1 | 105331.3 | 319986.3 |
| 4467775  | 4141088  | 5518.244 | 16895.92 | 46733.51 | 4562753  | 9531242  | 7646144  | 995708.8 | 3206448  |
| 2301785  | 2016056  | 22301.12 | 6189.909 | 89684.47 | 550388.6 | 6175437  | 4651755  | 713111.8 | 2031173  |
| 1800920  | 1687223  | 1390836  | 1635231  | 2021629  | 688130.8 | 739115.7 | 0        | 0        | 3526315  |
| 874324.7 | 564003.6 | 112996.5 | 170181.1 | 1055881  | 2789016  | 2076860  | 995842.1 | 69987.79 | 574545.9 |
| 1606562  | 1063329  | 11260.16 | 2732.294 | 551267.1 | 1521965  | 3455345  | 2633984  | 768556.5 | 1812855  |
| 670852.3 | 721998.3 | 2730.884 | 0        | 4384.759 | 169689.2 | 1733336  | 1505045  | 113645.3 | 314987.9 |
| 457539.7 | 151818.6 | 364285.3 | 63077.33 | 379578.4 | 610051.5 | 515340.1 | 599083.4 | 246108.5 | 527538.9 |
| 77575.96 | 66329.66 | 8860.188 | 3320.377 | 32904.47 | 438919.8 | 183044.5 | 87521.35 | 0        | 23193.76 |
| 2252655  | 1486419  | 341419.2 | 801836.6 | 4795448  | 3002606  | 6519169  | 4105911  | 0        | 2467204  |
| 1518599  | 1303563  | 21306.97 | 14038.47 | 132445.8 | 971232.3 | 3652223  | 3419754  | 366070.9 | 940742.1 |
| 1573220  | 1383532  | 244712.8 | 315959.3 | 174115.3 | 820813.1 | 3559319  | 3154809  | 407274   | 1478853  |
| 253156.6 | 137589.8 | 17256.81 | 20880.28 | 12446.74 | 215827.4 | 598180.2 | 298554.7 | 62079.85 | 179363   |
| 673420.1 | 493423.9 | 53617.11 | 13180.13 | 150589.2 | 1113501  | 1021356  | 542217.3 | 58580.76 | 413281.7 |

|          |          |          |          |          |          |          |          |          |          |
|----------|----------|----------|----------|----------|----------|----------|----------|----------|----------|
| 1090122  | 1043831  | 20805.46 | 24772.31 | 25421.05 | 1248073  | 2165203  | 1561998  | 92870.3  | 867883.4 |
| 3303359  | 2302736  | 68710.97 | 36794.28 | 992824.4 | 3166107  | 7071668  | 5676289  | 1435074  | 3464452  |
| 113895.9 | 97740.96 | 30106.69 | 24413.84 | 57841.02 | 567294.1 | 243342.3 | 64732.85 | 5987.243 | 77889.04 |
| 279437.1 | 232761.7 | 11985.16 | 3107.055 | 6242.861 | 26248.5  | 777277.6 | 589208.4 | 93476.85 | 177463.1 |
| 11136856 | 12436271 | 6669651  | 7894958  | 2073237  | 10061884 | 10681516 | 33307317 | 5107970  | 4392006  |
| 5157673  | 4382168  | 169775.7 | 276138.3 | 1847101  | 5624032  | 9644904  | 5520820  | 290428.2 | 1177306  |
| 386813.7 | 263866.8 | 252137.6 | 391989   | 710292.6 | 57505.54 | 1283264  | 782577.1 | 231197.3 | 154152.4 |
| 239565.1 | 187423.2 | 34979.72 | 51568.24 | 162472   | 1241838  | 466252.7 | 418624.3 | 23674.91 | 61528.36 |
| 244135.5 | 182323.4 | 45229.7  | 55014.95 | 109007.9 | 511600.8 | 134372.9 | 302207.6 | 0        | 108761.1 |
| 4001917  | 3535415  | 507799.5 | 246209.6 | 4089742  | 8624393  | 17902086 | 9405011  | 153456.3 | 1630949  |
| 349448.8 | 353487.1 | 142712.9 | 73114.56 | 281186.7 | 846665.2 | 1264630  | 976497.7 | 196777.5 | 126486.8 |
| 1149150  | 781828.8 | 112230.6 | 89214.65 | 297760   | 1912335  | 1694490  | 1345522  | 111045.4 | 610593.2 |
| 1784667  | 1856473  | 128569.4 | 64893.66 | 192411.8 | 282856.6 | 4553032  | 4833159  | 402002.5 | 1904661  |
| 5061855  | 6081370  | 2873245  | 3478970  | 856139.5 | 4639464  | 4576993  | 15902586 | 2132066  | 1664229  |
| 4025990  | 5700690  | 4688415  | 867068.3 | 1032474  | 3658711  | 1481373  | 14047598 | 715367.8 | 659175.8 |
| 36950385 | 25776349 | 2390364  | 2974295  | 78638322 | 43353807 | 1.52E+08 | 39886586 | 3901443  | 19886104 |
| 983576.3 | 640455.4 | 144756.7 | 128749.5 | 571018.5 | 1145326  | 1663918  | 1086827  | 188575.5 | 518211.1 |
| 13736727 | 9273128  | 3175050  | 1888243  | 8279093  | 24800217 | 12640794 | 10271037 | 2542558  | 9555653  |
| 700832.2 | 328542.2 | 632096.1 | 496899.4 | 2355270  | 457659.3 | 770174.1 | 1254325  | 511801.9 | 581360.1 |
| 1803927  | 1061665  | 60976.62 | 82837.43 | 267717.1 | 2850675  | 3147531  | 2496570  | 347171.2 | 1026070  |
| 467580.1 | 437804.3 | 6525.684 | 10167    | 50665.22 | 40682.01 | 1263395  | 719252.5 | 123034.5 | 343969.9 |
| 1655279  | 1560631  | 2791.377 | 0        | 102446.9 | 177787.5 | 4526005  | 2515130  | 424453.9 | 1363612  |
| 273625   | 205435.5 | 142218.1 | 134101.6 | 291630.6 | 688595.1 | 553263.3 | 176725.8 | 50767.53 | 158438.1 |
| 664998   | 586123   | 544677.3 | 592699.2 | 392005.2 | 284278.6 | 657052.3 | 1360186  | 30769.83 | 246955.9 |
| 5337769  | 5245561  | 11343.94 | 6196.3   | 97314.09 | 7830595  | 9165916  | 12005008 | 627037.6 | 2477242  |
| 5328334  | 6248416  | 74925.71 | 126435.9 | 572824.2 | 6514881  | 9014870  | 4672984  | 55907.28 | 783570.7 |
| 225250.3 | 192633.6 | 50643.8  | 30065.24 | 30230.96 | 325523.5 | 344898.3 | 139417.9 | 31119.42 | 108879.2 |
| 1593567  | 1080038  | 118170.2 | 30034.37 | 530502.1 | 3445927  | 1408242  | 1720899  | 127683.6 | 995875.8 |
| 314588   | 145669.1 | 210750.2 | 157966.3 | 297636.6 | 941925.9 | 447829.6 | 245163.9 | 277512.9 | 297073.5 |
| 171703.4 | 135446.9 | 48464.25 | 66111.74 | 138989.5 | 229952.1 | 914632.9 | 325306.1 | 41006.41 | 106249.4 |
| 281303.9 | 126330.9 | 187761.7 | 286775   | 229348.8 | 994676.4 | 218781.3 | 470526.6 | 163407.7 | 169100   |
| 566894.5 | 347972.9 | 71171.08 | 121472.1 | 299080.7 | 202649.9 | 1295875  | 836887   | 121240.3 | 263517.7 |
| 1997269  | 1804340  | 483993.8 | 143330.2 | 230792.8 | 435724.1 | 4949882  | 5032270  | 1136073  | 1388715  |
| 662651.9 | 624343.8 | 7708.843 | 11282.55 | 103929.9 | 1061507  | 1001217  | 1674516  | 70101.2  | 349249.9 |
| 306489.1 | 316858.6 | 138463.7 | 76429.85 | 164704.4 | 1381026  | 646321.9 | 141101.8 | 36879    | 100154.5 |
| 398168.5 | 335052.6 | 0        | 2199.225 | 4824.332 | 587549.2 | 726328.7 | 895775.7 | 49732.48 | 201198.1 |
| 559073.4 | 427172   | 154810.9 | 116358.8 | 168561.5 | 198708.3 | 1268943  | 842409.9 | 26025.97 | 364774.6 |
| 398233   | 541095.9 | 0        | 0        | 3112.034 | 444410.7 | 684813.5 | 419908.7 | 31550.35 | 179715.6 |
| 204785.1 | 99763.8  | 30667.84 | 39135.09 | 277145.9 | 785273.8 | 341319.3 | 264986.7 | 111023.9 | 81895.9  |
| 3579385  | 4291842  | 880533.7 | 479808.4 | 846981.8 | 2143145  | 6704940  | 10613341 | 38113.13 | 990159.1 |
| 503814.6 | 136479.5 | 310166.3 | 540158.1 | 456200.1 | 511777.6 | 479004.2 | 340887.7 | 444760.3 | 441113.6 |
| 573151.4 | 435942.2 | 32634.06 | 10123.56 | 89171.86 | 1144800  | 687835.1 | 843721.8 | 35951.35 | 193913   |
| 436417   | 424536.5 | 137890.6 | 132413.4 | 99194.11 | 1277419  | 1746148  | 290523.8 | 175150.2 | 108443.6 |
| 269260.7 | 190697.6 | 173497.1 | 921897.2 | 576208.3 | 116532   | 113395.8 | 115612.6 | 150268   | 581202.9 |
| 6032303  | 3551758  | 1599978  | 801179.5 | 2947694  | 4591340  | 12330874 | 6624140  | 1266723  | 4122076  |
| 1913083  | 2117157  | 374234.5 | 140792.2 | 303384.3 | 619835.4 | 4375807  | 5652102  | 1030780  | 413205.6 |
| 9078234  | 11202623 | 11561.4  | 33001.14 | 105594.9 | 2593631  | 22549378 | 26114466 | 324025   | 1299732  |

|          |          |          |          |          |          |          |          |          |          |
|----------|----------|----------|----------|----------|----------|----------|----------|----------|----------|
| 2610704  | 1798813  | 187201.4 | 96642.7  | 627935.1 | 5315680  | 2924527  | 3731685  | 351976.9 | 1046444  |
| 805842.9 | 768502.8 | 118700.3 | 111531.6 | 123570.8 | 221102.2 | 1951842  | 1367219  | 137664.1 | 372776.6 |
| 3739768  | 2418776  | 391098.7 | 367770.8 | 493518   | 3385784  | 8349231  | 6591795  | 1068920  | 1516809  |
| 565077.9 | 554360.6 | 11934.41 | 6411.756 | 52870.92 | 152764.1 | 1467697  | 1001065  | 95554.65 | 360584.2 |
| 2401213  | 1684511  | 464574.4 | 256654.2 | 883906.8 | 1389077  | 5371516  | 2937321  | 398102.9 | 1420118  |
| 962343.4 | 805061   | 1057144  | 954112.2 | 3628239  | 552240.6 | 667020.5 | 2160073  | 3936.938 | 626318   |
| 3769730  | 3979924  | 264245.9 | 98276.14 | 1058987  | 1398185  | 42940511 | 9775957  | 39854.98 | 1465152  |
| 157517.2 | 174040.2 | 2638.904 | 2863.459 | 14492.09 | 40852.71 | 397919   | 358028.5 | 13227.36 | 70572.87 |
| 150747.9 | 216362.7 | 17719.16 | 79156.08 | 644084.6 | 113426.6 | 353016.9 | 531628.1 | 0        | 68034.95 |
| 10785467 | 7338707  | 5823326  | 2747949  | 20577330 | 11342904 | 32686114 | 20462097 | 110943.6 | 10839569 |
| 813695.5 | 543371.4 | 277119.7 | 251698.9 | 621407.3 | 2948514  | 1724851  | 810774.2 | 155057.6 | 445982   |
| 6751391  | 8683145  | 1746601  | 2189225  | 2101388  | 6482632  | 8532311  | 22168560 | 2211064  | 1974968  |
| 204269.4 | 174512   | 0        | 3148.821 | 7357.857 | 738221.1 | 963907.2 | 305402.4 | 0        | 101550.6 |
| 167334.6 | 154045.5 | 24829.94 | 28669.6  | 67196.36 | 87365.94 | 352152.8 | 64531.97 | 7483.755 | 176767   |
| 1591330  | 1397910  | 27120.75 | 14670.46 | 125769.3 | 1353314  | 3627522  | 2581769  | 233142.2 | 833374.8 |
| 191051.6 | 152488.7 | 49700.75 | 61925.21 | 73139.22 | 1123105  | 314968.6 | 304147.2 | 30523.43 | 68461.51 |
| 1328726  | 1304551  | 2627.899 | 3051.29  | 32786.56 | 930903.8 | 3149678  | 2061718  | 227601.3 | 1030621  |
| 592489.6 | 449751.8 | 40107.09 | 51512.58 | 358118.1 | 1342792  | 3015181  | 1038556  | 18013.38 | 272766.7 |
| 312755.7 | 279501.7 | 2842.98  | 2980.647 | 76239.21 | 505289.2 | 470223.4 | 712251.7 | 34068.97 | 70290.81 |
| 455957.5 | 161310.7 | 210461.5 | 398149   | 375654.7 | 590212.2 | 423005.2 | 496420.1 | 216213.4 | 416918.1 |
| 1943250  | 2154193  | 1448798  | 1328607  | 868500   | 1537204  | 1506305  | 5738919  | 1240247  | 436459.6 |
| 753145.8 | 796916.8 | 395956.4 | 485638.8 | 481432   | 2766593  | 1365716  | 561169.4 | 224457   | 49673.73 |
| 4231917  | 2975234  | 281602.2 | 232669   | 1061596  | 7679753  | 5771493  | 6022002  | 300684.1 | 1847585  |
| 651385.2 | 579624.5 | 113877.9 | 120044.4 | 101132.6 | 1834971  | 3127156  | 767611.8 | 34602.49 | 536462.6 |
| 1120025  | 719914.1 | 2119.018 | 5234.134 | 34337.26 | 1087896  | 2638211  | 1575068  | 158506.7 | 696629   |
| 1067196  | 389062.8 | 446159.3 | 628330.7 | 789675.2 | 1343544  | 1363073  | 1088622  | 572525.5 | 791550.2 |
| 18679253 | 25443082 | 7778206  | 3739159  | 10434340 | 71485058 | 53695231 | 46174214 | 38100.75 | 135145.3 |
| 278453.9 | 217963.3 | 76595.42 | 63207.81 | 138536.9 | 149525   | 562304.7 | 414508.2 | 247618   | 109342.2 |
| 1567994  | 913580.3 | 626562.5 | 864246.8 | 902170.5 | 1979248  | 1960955  | 1027106  | 988013.1 | 1195920  |
| 1426454  | 958888.8 | 311221   | 173735.8 | 980938.8 | 6993286  | 2803632  | 1063943  | 328465.3 | 880587.8 |
| 8045282  | 7117339  | 76676.81 | 78126.78 | 132227.6 | 21344507 | 50668269 | 12527747 | 120725.6 | 4789807  |
| 826335.6 | 753021.5 | 697089.8 | 668134.6 | 689740.6 | 569461.2 | 451017.8 | 504423   | 1675419  | 1592496  |
| 4204745  | 4984798  | 10328.34 | 0        | 33883.99 | 7364790  | 5402296  | 7765098  | 58980.98 | 705742.8 |
| 83000.13 | 53753.59 | 33218.59 | 46564.26 | 43425.75 | 90615.41 | 114957.9 | 57636.94 | 22489.84 | 56703.92 |
| 772924   | 683587.8 | 0        | 0        | 0        | 1355393  | 1203790  | 1337608  | 53665.32 | 444167.7 |
| 39090797 | 37384363 | 47819674 | 32499280 | 1.27E+08 | 8927449  | 56666006 | 95400459 | 2911635  | 57870459 |
| 368256   | 458600.8 | 323442.2 | 359841.8 | 317259.5 | 123878.5 | 61362.65 | 73486.69 | 1065766  | 608776.9 |
| 3636202  | 2780259  | 751761.2 | 223016.7 | 1383740  | 6095381  | 4662327  | 8219478  | 1714593  | 1265986  |
| 850012.1 | 490345.8 | 134764.3 | 95003    | 493932   | 2951074  | 2605411  | 1112781  | 216973.5 | 470434.6 |
| 461154   | 247639.8 | 239819   | 31704.3  | 277898.4 | 266591.7 | 929084.2 | 505426.9 | 82442.33 | 368488.5 |
| 961498.4 | 644442.7 | 145374   | 109632.9 | 552672.6 | 1123188  | 1648422  | 1053047  | 166756.1 | 507220.1 |
| 193898.5 | 114284.6 | 160587.9 | 227033.2 | 136919.2 | 91791.73 | 183859.7 | 100281   | 92256.05 | 143295.5 |
| 45331.02 | 15100.35 | 54071.29 | 52178.99 | 44547.89 | 43802.49 | 53782.7  | 32350.15 | 44046.43 | 49031.01 |
| 91827.5  | 92394.02 | 40951.87 | 34543.02 | 82450.01 | 202955.3 | 291407.9 | 221261   | 0        | 46088.11 |
| 2673630  | 1916749  | 204757.3 | 25066.82 | 172255   | 1007862  | 7140597  | 5741110  | 1159833  | 1719453  |
| 3703043  | 2693662  | 1064207  | 436580.9 | 2086764  | 2458715  | 7381548  | 8366751  | 1819806  | 1944266  |
| 204044.1 | 144707.6 | 23518.47 | 11156.63 | 90485.52 | 847434.3 | 605988.1 | 178647.9 | 10508.71 | 138982.8 |

|          |          |          |          |          |          |          |          |          |          |
|----------|----------|----------|----------|----------|----------|----------|----------|----------|----------|
| 754949.7 | 1236742  | 106949.8 | 98817.72 | 223577.3 | 1267836  | 280596.9 | 289601.8 | 89353.03 | 164197.9 |
| 9444841  | 10888599 | 591620.1 | 320226.2 | 442734.2 | 4930620  | 21991626 | 13520664 | 73183.21 | 26584961 |
| 208349.2 | 147631.1 | 23467.13 | 36060.49 | 278364.4 | 755088.6 | 398663.6 | 257785.2 | 12038.55 | 96831.96 |
| 5171961  | 3600557  | 457466   | 353105.9 | 1399452  | 10250610 | 5958791  | 7598760  | 754288.8 | 2360599  |
| 10773997 | 13162795 | 761786.5 | 439615.8 | 7402654  | 147372.1 | 23313295 | 26778767 | 15291.21 | 2356631  |
| 9906257  | 3770110  | 4140202  | 13864641 | 11096320 | 7842471  | 5302944  | 5807945  | 10840291 | 15849028 |
| 183416   | 175564.9 | 59074.17 | 37137.14 | 165287.6 | 745065.7 | 365526.8 | 211675.3 | 4944.937 | 87023.6  |
| 164844.7 | 123936.9 | 81234.93 | 556804   | 265336.1 | 105498.6 | 125398.7 | 107137.2 | 62021.45 | 378100.7 |
| 418001.8 | 196919.6 | 19066.4  | 3819.733 | 33253.51 | 192319.6 | 1135672  | 421900.1 | 214704.4 | 520738.8 |
| 144044.6 | 98749.28 | 63574.66 | 71420.11 | 91280.62 | 544308.9 | 254441   | 247732.5 | 25780.97 | 85448.74 |
| 395458.5 | 242850.1 | 271057.9 | 254668.9 | 124909.5 | 1328105  | 737360.2 | 744179.3 | 98538.44 | 248536.6 |
| 625208.7 | 397793.5 | 93383.42 | 13642.94 | 117596.7 | 1377878  | 601598.9 | 1058293  | 100128.8 | 324477.9 |
| 337695   | 239951.4 | 50627.17 | 42938.6  | 152579.4 | 381489   | 610324   | 488909.6 | 47151    | 109012.2 |
| 359724.8 | 245486   | 112733.5 | 118685.9 | 212578.1 | 356597   | 583068.7 | 301860.3 | 50943.63 | 235085.8 |
| 422471   | 329961.6 | 3247.133 | 2396.5   | 32163.68 | 400387.3 | 970471.8 | 849268.4 | 171916.1 | 340104.7 |
| 13025411 | 8866008  | 1274653  | 1121444  | 3512180  | 25701883 | 15117036 | 19832095 | 1772054  | 6223065  |
| 187710.6 | 229260.3 | 46581.28 | 204415.5 | 158510.7 | 148560.6 | 56783.49 | 107555.3 | 24907.36 | 175180.3 |
| 1839189  | 1220459  | 510546.5 | 270929.4 | 913516.1 | 1253760  | 3789899  | 1725290  | 364369.7 | 1251998  |
| 3092001  | 1613624  | 677075.9 | 606836.2 | 1080480  | 6992021  | 1935881  | 2396821  | 2005118  | 1581935  |
| 253078.4 | 233889   | 14496.28 | 10950.14 | 25632.12 | 664118   | 65750.89 | 320715.3 | 33070.14 | 613906.4 |
| 778434.4 | 716823.4 | 22070.58 | 6626.451 | 39243.49 | 365249.7 | 1992309  | 1487664  | 129440.4 | 518311.5 |
| 440687.2 | 406265.1 | 41266.34 | 35588.7  | 64133.97 | 2364680  | 1189650  | 465338   | 8735.104 | 84336.68 |
| 6663853  | 3865738  | 90953.65 | 139009.9 | 379728.8 | 8062408  | 14605772 | 9309637  | 1108285  | 4787689  |
| 1220522  | 1003059  | 168636.7 | 112857.5 | 428949.7 | 7330778  | 2427177  | 2639896  | 70873.1  | 502089.1 |
| 793000.7 | 954909.1 | 337270.9 | 1282751  | 287744.9 | 355115.4 | 302795   | 853692.2 | 62561.01 | 528636.7 |
| 578218.5 | 725575.9 | 2266.748 | 0        | 19588.48 | 232205.1 | 1397558  | 1835783  | 20476.98 | 303815.4 |
| 839197.1 | 577134.7 | 64884.53 | 39470.67 | 170790.1 | 1666372  | 1035799  | 1241900  | 100972.7 | 366392.9 |
| 776081   | 544426.9 | 2839.343 | 8654.084 | 44148.66 | 2765553  | 3496714  | 1004087  | 59530.44 | 698463.9 |
| 1110382  | 786574.2 | 110653.5 | 78827.36 | 97460.63 | 1598142  | 2041395  | 934862.3 | 141770.8 | 820568.9 |
| 1169661  | 1479333  | 12312.67 | 16954.44 | 19641.47 | 1721181  | 1761885  | 1756582  | 194901.6 | 235464.2 |
| 1904218  | 814551.6 | 1857327  | 2373365  | 2193294  | 838908.4 | 813035.1 | 2386180  | 1028773  | 1003125  |
| 1294557  | 2004027  | 0        | 0        | 0        | 418664.6 | 2922671  | 4671590  | 18332.57 | 0        |
| 3039858  | 2456472  | 738438.8 | 1513311  | 2788997  | 11754846 | 5126662  | 2850128  | 399717.3 | 1309656  |
| 2980031  | 3493290  | 9558.218 | 8647.221 | 348728.6 | 3687008  | 5240514  | 2819664  | 59552.33 | 377813.3 |
| 205504.5 | 147704.5 | 42884.8  | 9302.057 | 98879.64 | 128186.9 | 448078.4 | 136557.5 | 31508.48 | 154320.8 |
| 1935291  | 1599642  | 252949   | 233954.3 | 220673.2 | 1029896  | 4664509  | 3921639  | 500632.5 | 1822579  |
| 2812188  | 3424516  | 0        | 6475.692 | 16733.9  | 181846.5 | 7577738  | 7845222  | 77040.44 | 1094576  |
| 781033.2 | 469986.3 | 101702.7 | 124188.3 | 84980.81 | 1328890  | 1220609  | 911049.5 | 113570.1 | 819024.6 |
| 348850.6 | 75354.78 | 196580.9 | 317213.6 | 335579.5 | 364323.2 | 391533.2 | 388582.1 | 248426.2 | 316548   |
| 603525.9 | 652115.7 | 239095.4 | 593335.3 | 2344568  | 198426.3 | 1085333  | 1712025  | 21690.4  | 449872.9 |
| 207325.7 | 304334   | 0        | 0        | 8933.812 | 1178258  | 661398.2 | 158679.6 | 0        | 0        |
| 282907.6 | 171541.1 | 63211.31 | 36428.31 | 92926.86 | 1449196  | 622704   | 334030.3 | 75917.09 | 139312.8 |
| 2.84E+08 | 2.49E+08 | 15772579 | 8461199  | 1.46E+08 | 53259999 | 6.98E+08 | 3.21E+08 | 20620909 | 47478997 |
| 243279.4 | 141073.2 | 104904.6 | 214403.8 | 291643.8 | 204258.5 | 194221   | 355250.8 | 107835.7 | 120570.9 |
| 9958950  | 5792587  | 2860980  | 2517825  | 7118707  | 3702636  | 20917884 | 14503426 | 2342413  | 7715123  |
| 3492595  | 2219293  | 1104136  | 1708526  | 3069250  | 11708240 | 6360157  | 4194794  | 638348.4 | 1724910  |
| 1940649  | 1646360  | 49197.07 | 5752.155 | 246992.3 | 800077.8 | 5050649  | 3318411  | 457541.2 | 1244503  |

|          |          |          |          |          |          |          |          |          |          |
|----------|----------|----------|----------|----------|----------|----------|----------|----------|----------|
| 169481.5 | 79964.41 | 46157.87 | 116695.6 | 182889.7 | 399228   | 321187.1 | 173247.2 | 45953.41 | 149597.4 |
| 3966730  | 2696849  | 309679.9 | 250610   | 1020047  | 7886076  | 4734562  | 5589601  | 465450.5 | 1929317  |
| 297762.8 | 99424.32 | 204624.3 | 295534.7 | 267804.6 | 577079   | 372546.5 | 312312.9 | 213898   | 185824.2 |
| 1397459  | 969829   | 267606.4 | 142449.7 | 1067535  | 5710688  | 3205663  | 2408118  | 102207.4 | 755148.5 |
| 1804336  | 1490859  | 114601.1 | 51240.33 | 254672.7 | 714549.8 | 4661880  | 3385742  | 493889   | 1204195  |
| 1442762  | 1123205  | 187988.5 | 45300.82 | 1183905  | 1841601  | 2062349  | 1407319  | 277044.1 | 642363.3 |
| 2472992  | 1712165  | 464352.2 | 244117.7 | 1408635  | 12185418 | 5160214  | 2972168  | 282429.9 | 1153690  |
| 568474.6 | 439556.7 | 134667.8 | 203807   | 99608.01 | 1332617  | 177736.9 | 635169.1 | 138751.7 | 282004.3 |
| 639585.7 | 463719.7 | 38763.93 | 67493.74 | 385700.9 | 1433715  | 3122955  | 1112105  | 42095.3  | 282876.1 |
| 247152.1 | 201027.7 | 0        | 0        | 4982.006 | 321006.1 | 507581.1 | 478963.6 | 34256.58 | 171664.7 |
| 3586005  | 5269881  | 184778   | 471924.3 | 5188918  | 954956.1 | 3567215  | 12337600 | 22578.78 | 4777611  |
| 138049.8 | 159763.6 | 11704.74 | 3189.652 | 100169.7 | 686721   | 321081.5 | 82140.67 | 5596.538 | 23064.13 |
| 549814.5 | 500576.2 | 11120.76 | 3619.667 | 211261.8 | 2532765  | 1648860  | 1288587  | 10506.87 | 165724   |
| 1.12E+08 | 81013936 | 4058660  | 1966200  | 22843723 | 1.08E+08 | 2.5E+08  | 2.05E+08 | 32219486 | 92683890 |
| 647188.3 | 232417.7 | 438162.3 | 1355146  | 757810   | 631938.5 | 604146   | 948911.4 | 422283.4 | 576417.2 |
| 212077.4 | 98648.22 | 81527.1  | 80438.57 | 131430.7 | 323032.7 | 253319.2 | 265456.9 | 72543.41 | 166612.7 |
| 302263.5 | 164220.5 | 80630.32 | 460745.9 | 354564.9 | 234423.4 | 75658.84 | 140128.9 | 341772.2 | 563044.4 |
| 392369.3 | 289398.2 | 59281.86 | 74502.65 | 83886.51 | 1314103  | 1458978  | 742157.5 | 43120.36 | 312974.5 |
| 395821.7 | 293731.5 | 54030.49 | 104557   | 272953.1 | 1514978  | 953894.7 | 542328.3 | 37235.7  | 192359.6 |
| 3205749  | 2539796  | 792514.1 | 1358972  | 2623273  | 13155012 | 5554318  | 3449272  | 342441.5 | 1325490  |
| 330941.3 | 427789.9 | 4717.952 | 7885.119 | 0        | 459147.9 | 524444.3 | 744531.4 | 0        | 37709.61 |
| 414614.2 | 362227.8 | 60770.58 | 31546.05 | 193622.5 | 482145   | 703395.1 | 409582.3 | 36308.59 | 154087.3 |
| 259125.1 | 247171.5 | 2609.631 | 3218.235 | 19531.14 | 32058.75 | 719118.4 | 382627.8 | 52825.6  | 210878.1 |
| 341222.5 | 244077.6 | 23288.27 | 29597.38 | 97679.71 | 641885.9 | 434618.7 | 417378.8 | 33362.74 | 138754.8 |
| 227584.2 | 201790.1 | 3135.179 | 3999.854 | 22547.42 | 232114.1 | 495212.2 | 301598.3 | 0        | 39641.69 |
| 571161.9 | 302907.8 | 87119.28 | 101016   | 122692.8 | 1016452  | 821677.7 | 686063.2 | 135553   | 384714.1 |
| 200603.8 | 135081.6 | 88129.77 | 279560.1 | 217403   | 413120.1 | 235826.5 | 184458.6 | 64774.93 | 87551.82 |
| 646769.3 | 532786.5 | 65382.08 | 7217.049 | 114726.8 | 761575.3 | 1287148  | 588070.6 | 69764.33 | 332376.1 |
| 119481.9 | 79874.71 | 13568.71 | 21022.44 | 62300.28 | 173781.1 | 179653.3 | 188192.7 | 3499.035 | 78956.09 |
| 250739   | 194595.5 | 80220.73 | 123327.9 | 130106.4 | 433618.2 | 174964.2 | 214705.4 | 52216.86 | 203684.2 |
| 249651.3 | 150097.5 | 88125.82 | 76670.34 | 121659.4 | 823304.5 | 647758.8 | 192378.2 | 59289.53 | 226464   |
| 1048229  | 922768.2 | 8312.904 | 5499.93  | 37001.37 | 249689.5 | 2906679  | 2096770  | 242746.1 | 1014725  |
| 371642.9 | 337501   | 2848.63  | 4412.551 | 52651.84 | 351766.7 | 818181.2 | 761201.2 | 61026.2  | 263750.3 |
| 1845284  | 1632878  | 44826.41 | 7222.04  | 222995.5 | 691498.8 | 4844885  | 3143200  | 365896.9 | 1237650  |
| 276962.3 | 489954.2 | 2511.431 | 9578.483 | 42871.1  | 411644.1 | 229288.7 | 98108.72 | 5592.858 | 77059.49 |
| 59630.75 | 49583.38 | 2251.373 | 0        | 68588.05 | 232731.9 | 139207.5 | 89011.56 | 5173.974 | 5915.396 |
| 8722337  | 6082110  | 737307.9 | 461277.3 | 1996155  | 16692088 | 11387631 | 12396170 | 1395738  | 3305178  |
| 3219344  | 2301769  | 40677.59 | 13140.7  | 141427.2 | 2991597  | 7672389  | 4117451  | 467557.1 | 1951311  |
| 407563.7 | 266760.2 | 149837.6 | 184606.4 | 311700.1 | 1665368  | 627009.6 | 602187.1 | 33749.66 | 244636.5 |
| 4360652  | 695559.4 | 2725488  | 4118375  | 3154135  | 6075389  | 3814295  | 4384049  | 3676008  | 4029435  |
| 558039.1 | 355036.9 | 165620.2 | 108426.2 | 498768   | 2230108  | 1030793  | 590623.1 | 151682.3 | 243807   |
| 3875121  | 3234013  | 446567.5 | 485841.5 | 1597890  | 7187909  | 4080219  | 8537605  | 340425.8 | 1484953  |
| 517629.6 | 170316.3 | 445222.5 | 618659.8 | 558310.8 | 254055.8 | 427706   | 795483.5 | 358886.6 | 405379.9 |
| 1126887  | 730485.5 | 139871.6 | 983789   | 271150.3 | 1517867  | 1464867  | 1769911  | 154505.9 | 595127.3 |
| 1317364  | 2239391  | 294308.2 | 176515.7 | 395791.6 | 2318670  | 220718   | 595867.4 | 162562.2 | 189961.6 |
| 139894.1 | 111930.7 | 2967.193 | 0        | 3458.053 | 39967.25 | 389665.1 | 276008.9 | 0        | 53610.99 |
| 293383.6 | 289458.2 | 8123.933 | 2391.515 | 79943.28 | 809347.7 | 1529536  | 463659.1 | 60878.3  | 127431.6 |

|          |          |          |          |          |          |          |          |          |          |
|----------|----------|----------|----------|----------|----------|----------|----------|----------|----------|
| 1189656  | 625291.5 | 201103   | 341754.5 | 1945071  | 531944.4 | 1622656  | 1981175  | 649513.3 | 651107.1 |
| 14658776 | 8970165  | 3184634  | 1982674  | 9983311  | 66329188 | 29367591 | 12198632 | 3156942  | 10470037 |
| 4657480  | 6582754  | 9957.752 | 8346.598 | 43733.04 | 197438.6 | 12091037 | 16182762 | 780385.5 | 3580194  |
| 4086243  | 5053635  | 335186.8 | 503889   | 11985029 | 3401733  | 15199583 | 12865350 | 29934.25 | 2158724  |
| 254255.8 | 265561.6 | 2898.085 | 2771.931 | 0        | 359741.4 | 458071.7 | 655883   | 0        | 134435.6 |
| 7072535  | 10055300 | 401525.6 | 403271.9 | 350354.7 | 6178359  | 13073928 | 1439194  | 47796.58 | 9350519  |
| 58005.28 | 28828.37 | 7541.309 | 32672.7  | 21643.12 | 95324.62 | 72762.88 | 92023.24 | 29047.09 | 26742.66 |
| 209799.5 | 265616.9 | 3712.306 | 0        | 253356.2 | 343264.1 | 1152842  | 675653   | 13470.05 | 158172.1 |
| 523721   | 331412.3 | 95178.98 | 48308.52 | 70871.94 | 1100486  | 574726.7 | 901899.4 | 110675.2 | 296767.5 |
| 230752.5 | 230985.2 | 107852.1 | 27277.5  | 193282.5 | 142024.8 | 345785.4 | 433158.2 | 27550.33 | 152361   |
| 1961154  | 489549   | 1254806  | 2132611  | 1627962  | 1636212  | 2320438  | 2585052  | 1335362  | 1668734  |
| 25459769 | 2969352  | 5618254  | 4071064  | 12383816 | 51841312 | 26685611 | 22294868 | 29928313 | 26456213 |
| 11907448 | 24253670 | 866109.9 | 1886489  | 14905500 | 6239623  | 2671461  | 55240953 | 0        | 3080365  |
| 144010.7 | 72486.56 | 26227.59 | 14615.79 | 63967.22 | 191551.8 | 256634.8 | 219156.6 | 25418.49 | 142250.9 |
| 274429.8 | 198381   | 24605.46 | 56882.56 | 198584.6 | 312289.8 | 441538.1 | 315851.5 | 37226.11 | 148169   |
| 6790317  | 6178704  | 2943018  | 3686712  | 3582770  | 10469164 | 4301277  | 2978333  | 677984.4 | 8694236  |
| 1524035  | 2382388  | 0        | 0        | 0        | 838547.9 | 3219447  | 5614703  | 13028.5  | 0        |
| 345296.9 | 259268.2 | 11220.68 | 11655.64 | 14714.66 | 359792.1 | 781223.8 | 504426.4 | 35101.12 | 224030.2 |
| 697141.1 | 359060.1 | 436291.8 | 523399   | 985310.8 | 790354.2 | 126539.9 | 965236.1 | 66260.52 | 784958.4 |
| 11575491 | 11653826 | 258696.1 | 98419.28 | 10225148 | 2782980  | 24587724 | 7353378  | 462708.2 | 2794611  |
| 1955288  | 1775131  | 82567.53 | 23320.63 | 755498.1 | 8934867  | 5711230  | 4552353  | 41498.95 | 566755.1 |
| 1052405  | 404050.5 | 146158.8 | 49238.89 | 281471.9 | 1720711  | 1803085  | 1480071  | 683965.3 | 1129157  |
| 1018742  | 828268.3 | 124546.6 | 48188.52 | 287746   | 565244.3 | 2420106  | 1604368  | 209429.4 | 719067.5 |
| 61865821 | 1.28E+08 | 27216288 | 16099915 | 90057191 | 351921.6 | 263754.5 | 105025.1 | 18537734 | 115320.7 |
| 603685.9 | 414593.8 | 86832.08 | 173694.8 | 301553.3 | 1069211  | 648085.2 | 1290850  | 204356.9 | 373214.8 |
| 4284980  | 2947379  | 395768.6 | 253241.4 | 1136518  | 8568441  | 5077523  | 6402147  | 586470   | 1951659  |
| 130893.6 | 123851.6 | 0        | 0        | 5401.314 | 131111.8 | 290856.1 | 284568   | 0        | 207454.1 |
| 1000096  | 1281608  | 536686.7 | 685403.7 | 140531   | 830491.4 | 1060854  | 3290063  | 428873.8 | 350256.2 |
| 2332187  | 1703156  | 1146149  | 310211.2 | 1441399  | 406344.9 | 5052264  | 3253068  | 0        | 3196956  |
| 822799.7 | 608243.8 | 179932.7 | 108862.1 | 1289837  | 3529684  | 975441.1 | 712713.2 | 151441.5 | 582184   |
| 6430958  | 4170881  | 535385.2 | 365203.8 | 1616067  | 12593142 | 8239610  | 8288147  | 936873.5 | 3111067  |
| 2103525  | 4205830  | 0        | 0        | 13313.51 | 135605.3 | 4368232  | 9616332  | 0        | 0        |
| 175465.2 | 127471.1 | 4304.397 | 0        | 0        | 7783.025 | 523345.7 | 236428.6 | 0        | 96893.74 |
| 7210252  | 4636168  | 1274306  | 636550.1 | 3001780  | 7059272  | 14635095 | 8611951  | 1246839  | 4877386  |
| 865706.1 | 1058878  | 9252.726 | 5283.758 | 0        | 678017.1 | 1918046  | 1472668  | 0        | 164705.8 |
| 107442   | 81255.13 | 20339.48 | 17548.24 | 46681.98 | 160716.2 | 154018.2 | 134723.7 | 4641.412 | 42317.54 |
| 120148.2 | 81776.85 | 37353.96 | 53195.92 | 55676.5  | 102021.2 | 213822.1 | 106814.1 | 3553.388 | 112456.4 |
| 365544.8 | 749552.9 | 21322.49 | 2986223  | 609588.9 | 82637.24 | 27545.31 | 0        | 58802.35 | 1705800  |
| 1430343  | 1985670  | 316027.3 | 348134.1 | 1375345  | 663426.3 | 1726242  | 680808.3 | 535040.6 | 435996.5 |
| 215665.7 | 136520.8 | 117835.1 | 110564.5 | 106013.8 | 697985.8 | 430232.8 | 211516.5 | 44269.87 | 127340.2 |
| 225204.1 | 212570.3 | 17269.45 | 6386.258 | 389221.1 | 190013.6 | 1241882  | 530761.5 | 36932.44 | 271113.1 |
| 4966779  | 3515900  | 433468.4 | 280142.2 | 1203631  | 10200606 | 5640683  | 7225389  | 617835.4 | 2252596  |
| 8893611  | 11067229 | 4880531  | 1335780  | 9436564  | 1364149  | 11869080 | 25070711 | 122719.2 | 15833877 |
| 711715.7 | 597330.2 | 38431.96 | 212078.3 | 193743.8 | 1117345  | 1003193  | 803379   | 123937.8 | 372549.8 |
| 44571015 | 72027087 | 19785598 | 1602192  | 22991549 | 73703242 | 4119056  | 46567697 | 553229.1 | 5963752  |
| 713537.8 | 430980   | 190075.7 | 245779.6 | 374502.6 | 2580525  | 1668367  | 1033057  | 78455.8  | 473450.3 |
| 184913.4 | 188270.6 | 13165.93 | 9923.428 | 206147.3 | 984095.9 | 282540.1 | 95254.65 | 16447.53 | 78564.44 |

|          |          |          |          |          |          |          |          |          |          |
|----------|----------|----------|----------|----------|----------|----------|----------|----------|----------|
| 816845   | 702929.4 | 5067.785 | 13328.48 | 58405.52 | 251656.6 | 2234182  | 1447894  | 65264.24 | 1078430  |
| 1243561  | 345640.8 | 613683.5 | 906624.3 | 1394084  | 1398608  | 1284508  | 1441410  | 866411   | 1739795  |
| 227842.3 | 148039.6 | 49386.74 | 21239.34 | 121504.3 | 137130.8 | 500764.6 | 398091.8 | 88719.45 | 64064.52 |
| 728009.3 | 635707.4 | 0        | 8387.931 | 0        | 871592.7 | 1556623  | 1083486  | 52350.8  | 311694.6 |
| 452021.7 | 328698.7 | 365509.9 | 44068.62 | 513270.6 | 260913.1 | 577622.3 | 199795.6 | 311571.8 | 444083   |
| 691862.5 | 628913.2 | 121936.1 | 355787.4 | 611993.2 | 2685229  | 1222642  | 596309.5 | 45580.38 | 238354.6 |
| 856894.5 | 982933.7 | 59339.86 | 14864.81 | 415034.8 | 1349366  | 984111   | 800065   | 219352.4 | 211694.3 |
| 13096613 | 9890049  | 2637084  | 1373837  | 5832788  | 14840883 | 23550580 | 14972042 | 2070887  | 6473507  |
| 6148831  | 4131282  | 586056.6 | 6677576  | 3997042  | 21850548 | 9343167  | 6022445  | 50838.29 | 4745004  |
| 140661.8 | 126543.1 | 13609.11 | 2605.206 | 68917.27 | 721133.6 | 324262.3 | 98339.5  | 5263.391 | 58462.21 |
| 831836.5 | 659563.4 | 347901.8 | 75841.66 | 419464.9 | 309021.2 | 1801647  | 1864528  | 178317.6 | 421202.7 |
| 5493502  | 4449348  | 127095.6 | 60722.9  | 931635.9 | 4474278  | 12946983 | 10746661 | 1340078  | 4381110  |
| 1345865  | 1166637  | 31378.13 | 5288.935 | 94030.12 | 1298953  | 3066385  | 2308305  | 199981.7 | 767028.1 |
| 1085693  | 871610.6 | 989418.2 | 1095738  | 860691.3 | 926348.6 | 368022.7 | 802532.1 | 80515.77 | 584453.9 |
| 178067.4 | 286157.2 | 0        | 0        | 41096.57 | 214116.8 | 236510.3 | 685567.2 | 0        | 44556.43 |
| 208596.3 | 206161.4 | 234700.1 | 315299   | 158513.9 | 630643.1 | 78011.34 | 253827.8 | 10067.7  | 17337.19 |
| 4.42E+09 | 3.61E+09 | 1.77E+09 | 1.05E+09 | 5.44E+09 | 6.72E+09 | 1.6E+10  | 9.85E+09 | 14968016 | 2.87E+09 |
| 24539671 | 22453701 | 157656.8 | 2958.497 | 649760.2 | 1448037  | 71325804 | 51155797 | 1964800  | 11855391 |
| 5143289  | 2781527  | 1310371  | 2037282  | 2768167  | 17590375 | 12070866 | 4968678  | 906034.8 | 4620014  |
| 488864.5 | 641128.5 | 4273.519 | 0        | 0        | 128690.6 | 1249229  | 1324962  | 0        | 2377.684 |
| 225319   | 177698.2 | 32143.49 | 33576.64 | 81523.12 | 174647.3 | 479336.1 | 95676.54 | 27197.69 | 242084.8 |
| 286247.8 | 231658.9 | 0        | 0        | 11928.51 | 302593.7 | 651448.6 | 359618.4 | 15994.36 | 349737   |
| 191916   | 193788.6 | 0        | 6493.021 | 26327.74 | 1027177  | 536606.5 | 423462.9 | 0        | 24291.19 |
| 411979.3 | 306413.6 | 2751.016 | 3254.356 | 7316.494 | 125418.2 | 1166658  | 820133.1 | 14284.36 | 228905.8 |
| 594028.1 | 899409.9 | 5445.712 | 0        | 0        | 482379   | 1166642  | 2084774  | 0        | 0        |
| 7887776  | 5494788  | 699122.4 | 499194.6 | 2934965  | 9458380  | 15219293 | 15439629 | 733787   | 6681201  |
| 2927295  | 1991210  | 317435.4 | 157434.8 | 804454.8 | 5932906  | 3397322  | 4394891  | 410041.7 | 1404712  |
| 404877.4 | 341607.8 | 9863.92  | 4215.519 | 19918.03 | 419974.1 | 910559   | 741908.2 | 78875.8  | 257379.6 |
| 968818.6 | 1007841  | 128095   | 70812.04 | 343986   | 1695493  | 1056278  | 2492280  | 68843.71 | 228462.5 |
| 562500.5 | 693697   | 16400.09 | 14154.33 | 0        | 36030.04 | 1529025  | 1762249  | 408578.5 | 440347.4 |
| 26189908 | 14747999 | 1281522  | 465651.7 | 1404396  | 10562027 | 72968312 | 46294148 | 14045866 | 23199422 |
| 468443   | 327298.2 | 153166.9 | 41609.51 | 98358.5  | 778054.2 | 671340.1 | 373521.4 | 91849.1  | 375334.2 |
| 5091164  | 4732478  | 5588.871 | 0        | 80144.88 | 6216477  | 10637484 | 8870712  | 1123493  | 3503919  |
| 15701500 | 25813449 | 1827167  | 1155061  | 6750067  | 23161115 | 10428820 | 1307824  | 1207517  | 2550116  |
| 58514801 | 36225804 | 12196842 | 6500751  | 24124714 | 63329017 | 1.14E+08 | 70421190 | 11695602 | 38076371 |
| 292544   | 302816.8 | 0        | 2869.733 | 0        | 142865.1 | 756774.3 | 397164.5 | 29557.53 | 279040.1 |
| 7682494  | 6597067  | 625999.9 | 380694.3 | 2313368  | 12159764 | 11753299 | 9322240  | 544414.5 | 4241401  |
| 1704495  | 832736.2 | 604651.3 | 528984.5 | 1086431  | 1231524  | 3302504  | 1838578  | 436732.5 | 1399166  |
| 3650193  | 4998742  | 1787574  | 61533.61 | 1860971  | 1788083  | 5809461  | 12445315 | 0        | 2480457  |
| 111843.4 | 69864.8  | 33165.39 | 29468.33 | 9348.015 | 179494.4 | 171204.9 | 168935.3 | 30940.68 | 81222.79 |
| 554733   | 406103   | 87032.35 | 85632.24 | 108914.7 | 1103315  | 625313   | 1012351  | 62062.72 | 203683.6 |
| 186505.1 | 165747.7 | 41990.36 | 26161.68 | 70319.56 | 916979.5 | 409478.1 | 165726.9 | 14821.37 | 83445.51 |
| 578581.9 | 541731.4 | 0        | 5159.917 | 26629.64 | 491922.2 | 1366170  | 1077725  | 0        | 68045.45 |
| 192057.7 | 143783.8 | 76139.19 | 92720.95 | 104410.8 | 199349.9 | 276408.7 | 145176.7 | 47962.82 | 135865.7 |
| 1389820  | 829978.9 | 400206.5 | 305530.8 | 654818.4 | 6849369  | 2472508  | 1396169  | 351687.1 | 795162.6 |
| 524580.4 | 814193.8 | 0        | 5153.888 | 13780.49 | 369822.3 | 1054381  | 462858.2 | 8583.137 | 188546.5 |
| 786014.3 | 589772.9 | 17363.7  | 19079.46 | 58302.77 | 1095373  | 1564466  | 1465831  | 124210.1 | 611155   |

|          |          |          |          |          |          |          |          |          |          |
|----------|----------|----------|----------|----------|----------|----------|----------|----------|----------|
| 610701.9 | 96083.73 | 487088.4 | 664458.8 | 677892.6 | 259567.6 | 698405.5 | 726973.8 | 577934.3 | 592030   |
| 261074.3 | 196161.3 | 199997.3 | 209202.5 | 199152.4 | 324498.4 | 102816.2 | 253484.3 | 83795.72 | 98403.7  |
| 141901.5 | 93693.36 | 22095.68 | 12487.72 | 78012.7  | 471436   | 444241.3 | 280632.9 | 61483.97 | 88457.15 |
| 3988050  | 3290701  | 59754.68 | 170038.1 | 393591.7 | 1292767  | 10861343 | 4369221  | 584712.1 | 1661844  |
| 14786394 | 10558076 | 1342490  | 877390.4 | 3748441  | 30755581 | 16365179 | 19231623 | 2021226  | 6247335  |
| 1595840  | 1172880  | 410506.4 | 247520.6 | 937296.2 | 6913526  | 3372034  | 1162154  | 282309.5 | 870485.3 |
| 331694.3 | 188101.8 | 147848.5 | 122716.4 | 130292.1 | 476002.9 | 455101.3 | 455641.9 | 128707.7 | 143717.2 |
| 534326.3 | 357607.6 | 41655.05 | 56144.84 | 153007.8 | 993242.3 | 722679   | 927850   | 51882.41 | 304077.1 |
| 5930739  | 4211794  | 497799.1 | 298385.7 | 1577102  | 12481556 | 6415761  | 7712498  | 767350.9 | 2442798  |
| 9506052  | 11445979 | 147101   | 252767.5 | 1124244  | 8087215  | 20049962 | 29155175 | 229775.5 | 3476583  |
| 27187490 | 17325530 | 2351257  | 2007102  | 7256555  | 48603801 | 40235684 | 38284368 | 4235896  | 14403875 |
| 352429.6 | 275267.8 | 53043.63 | 3470.361 | 72548.89 | 292136.5 | 803521.6 | 578789.6 | 70875.84 | 238029.6 |
| 1285847  | 219950.5 | 1058200  | 1338924  | 1548677  | 724642.8 | 1279563  | 1588978  | 1102632  | 1041329  |
| 1193750  | 1003829  | 193591.6 | 258133.5 | 461131.3 | 1405487  | 2037649  | 1244706  | 161366.6 | 516247.5 |
| 139310.1 | 72430.88 | 100045.6 | 62749.86 | 99849.86 | 252312.3 | 368916.6 | 154103.4 | 31405.67 | 114536.7 |
| 302012.6 | 190382.1 | 253152.7 | 223544.6 | 207052.6 | 361336.2 | 208302.7 | 435757.8 | 114670.5 | 78868.25 |
| 3743948  | 2265950  | 1016762  | 429601.6 | 1749694  | 4598338  | 6606374  | 3814446  | 729378.9 | 2442463  |
| 243290.6 | 190630.1 | 43947.14 | 60248.02 | 325246.7 | 256666.7 | 244162.7 | 419616   | 91444.48 | 174547.4 |
| 227506   | 94870.73 | 49431.85 | 116911   | 132379.4 | 1470360  | 162074.8 | 233546.7 | 74269.81 | 217412.9 |
| 549221.5 | 334672.5 | 128885   | 77333.56 | 428173.9 | 1007819  | 482360.2 | 1067211  | 145014.4 | 497878   |
| 332286.2 | 191609.7 | 107088.4 | 586721.7 | 403139.3 | 124714.3 | 71068.91 | 150081.9 | 324625.9 | 640384.2 |
| 1355494  | 1071951  | 120882.8 | 232814.4 | 318506.6 | 3119876  | 931914.7 | 2010100  | 167772.4 | 242785.6 |
| 106766.2 | 111066   | 0        | 0        | 0        | 5855.8   | 308306.2 | 286074.6 | 0        | 30959.78 |
| 3648462  | 2493575  | 1221449  | 894472.5 | 2961641  | 1148031  | 7412545  | 6531558  | 199174.6 | 2152331  |
| 289974   | 312057.3 | 97401.57 | 69287.17 | 148981.7 | 307175.4 | 394387.8 | 196658.6 | 50365.65 | 180836.4 |
| 2105772  | 1774027  | 238370.1 | 109986.2 | 191343.9 | 3316753  | 3549973  | 1636920  | 211887   | 1458026  |
| 1298659  | 1824513  | 1165245  | 1110169  | 461181.1 | 410110.9 | 956357.7 | 4533009  | 776117.5 | 152045.5 |
| 1561525  | 1070784  | 205450.4 | 71506.13 | 469499.8 | 3130528  | 1825106  | 2505237  | 173889.2 | 788272.3 |
| 1349800  | 1052907  | 59352.29 | 5350.345 | 90660.25 | 156370.5 | 3917232  | 2439794  | 406644.3 | 835825   |
| 3908896  | 2162804  | 1085780  | 618311   | 2181894  | 3265476  | 7881399  | 4778917  | 995041.7 | 2526956  |
| 2821492  | 2039262  | 248391   | 89004.26 | 658480.8 | 5608772  | 3549554  | 3894003  | 438443.1 | 991755.8 |
| 1385456  | 1305721  | 86275.96 | 5751.798 | 183123.6 | 271967.4 | 3783023  | 2425390  | 375172.3 | 979122.5 |
| 4215606  | 4924291  | 108531   | 379639.2 | 722712.1 | 5070781  | 7403688  | 2167660  | 65022.15 | 1095441  |
| 2210935  | 1576041  | 568545.5 | 411561.8 | 1307578  | 8935830  | 4878507  | 2087898  | 239618.6 | 1209018  |
| 22730813 | 14109379 | 1972893  | 1336093  | 6090588  | 42749928 | 31910251 | 28774920 | 3572732  | 12349702 |
| 469398.9 | 264976.4 | 0        | 0        | 21492.81 | 815268.5 | 854189.3 | 660770.8 | 46418.31 | 371006   |
| 31012375 | 19779710 | 2614596  | 2032474  | 7978528  | 57580947 | 44247337 | 45278118 | 4875957  | 14455157 |
| 6554363  | 5907139  | 127040.9 | 290993.9 | 473975.8 | 620329   | 18718011 | 15873617 | 1538034  | 4314073  |
| 11617546 | 11386817 | 6515262  | 4078088  | 14757214 | 3191392  | 13705972 | 29614192 | 0        | 14962483 |
| 3092777  | 2874125  | 6714.933 | 11372.54 | 21295.28 | 4277644  | 6097286  | 5673009  | 637249.3 | 2154173  |
| 8577303  | 12702445 | 3172851  | 2046804  | 2733938  | 3227188  | 14391990 | 30931800 | 0        | 6081248  |
| 1417390  | 1299701  | 10047.11 | 0        | 72307.3  | 472627.3 | 3892207  | 1532371  | 139933.2 | 555829   |
| 1443685  | 211947.4 | 917540.1 | 1322635  | 1402688  | 1507005  | 1640253  | 1310711  | 1199990  | 1566866  |
| 1564935  | 958317.7 | 499144.9 | 510489.2 | 461887.5 | 3678553  | 6146822  | 1891415  | 256393.7 | 976783.2 |
| 761792.8 | 494404.1 | 179558.2 | 117139.8 | 318101.2 | 1331973  | 960767   | 1423736  | 184330.9 | 388605.3 |
| 3897139  | 3560770  | 46926.56 | 30171.84 | 327535.8 | 11342794 | 20004586 | 4768323  | 105069.2 | 3428069  |
| 456175.4 | 296843.6 | 153744.8 | 57718.22 | 388154.8 | 1832804  | 834908.3 | 772517.1 | 122665.7 | 193931.8 |



|          |          |          |          |          |          |          |          |          |          |
|----------|----------|----------|----------|----------|----------|----------|----------|----------|----------|
| 139271.7 | 110902.9 | 306076.7 | 167417.2 | 197082.9 | 157685.3 | 46812.24 | 149584.6 | 34599.14 | 23067.25 |
| 31457708 | 20021178 | 2801900  | 2202380  | 8307718  | 57235986 | 45900200 | 44950263 | 4875208  | 15437798 |
| 910886.4 | 838783.1 | 15490    | 14692.65 | 869807.7 | 1611052  | 4702185  | 2293534  | 9705.56  | 668809.8 |
| 21970964 | 26533330 | 15940339 | 10138747 | 39204955 | 19372391 | 69544625 | 67588650 | 412856.5 | 8375104  |
| 1196378  | 757092.5 | 128170   | 71433.66 | 289845   | 1680906  | 2250023  | 1362927  | 195259.7 | 784517.6 |
| 484717.3 | 479812.5 | 17685.67 | 200242.4 | 1036785  | 50796.57 | 334817.5 | 619052.1 | 38584.83 | 1247519  |
| 20463796 | 13601243 | 1750500  | 1159076  | 4978581  | 39139715 | 27961077 | 29763216 | 3078226  | 8704740  |
| 506766.5 | 706394.1 | 6356.759 | 4453.226 | 0        | 27035.39 | 1352694  | 297386.9 | 21626.25 | 138505.5 |
| 430965.1 | 210814.7 | 269299.7 | 534983.8 | 529639.6 | 653618.6 | 481251.5 | 547216.7 | 575617.5 | 527948.8 |
| 28856596 | 26013656 | 175714.5 | 5873.23  | 776718.2 | 3140726  | 84084569 | 61760543 | 2812994  | 14743213 |
| 20334229 | 19326916 | 4449885  | 4667958  | 4364086  | 22766257 | 35737119 | 54197983 | 7308160  | 8704469  |
| 6769072  | 14514443 | 301501.1 | 46131215 | 17703927 | 0        | 295468.2 | 521877   | 0        | 593392   |
| 46726.46 | 31638.8  | 46695.61 | 0        | 44407.66 | 36942.61 | 222498.6 | 83391.71 | 11181.64 | 38375.96 |
| 2960418  | 3579385  | 3687408  | 533664.6 | 533338.4 | 4155292  | 892070   | 9122906  | 649454.2 | 346734.4 |
| 466429.2 | 472303.1 | 0        | 2399.237 | 6627.576 | 538309.8 | 986648   | 870032.4 | 49241.12 | 272009.6 |
| 456181.6 | 394431.1 | 5343.123 | 14616.04 | 34659.71 | 138169.1 | 1258825  | 876826.2 | 0        | 121089.3 |
| 3403017  | 2531380  | 716615.4 | 1225290  | 1764602  | 5294951  | 4060998  | 7626176  | 1278897  | 2209898  |
| 196882.4 | 137375.5 | 213727.5 | 246655.9 | 197962   | 195743   | 314091.6 | 102553.1 | 121147.6 | 68895.03 |
| 253450.1 | 192941.3 | 27615.07 | 28403.16 | 36979.64 | 588543.9 | 204800.7 | 440219.2 | 47847.39 | 136872.9 |
| 36239482 | 29965552 | 7336084  | 8382378  | 10930921 | 10351074 | 87516758 | 75658946 | 8255007  | 11408063 |
| 887270.1 | 623623.4 | 78417.14 | 41838.74 | 224452.9 | 1748790  | 1132752  | 1092410  | 78672.13 | 437425.1 |
| 472922.7 | 287188.8 | 101140.3 | 94666.67 | 117917.2 | 502261.3 | 961848.7 | 788266.6 | 110849.1 | 368899.1 |
| 3937986  | 2766842  | 771974.7 | 311506.6 | 1891544  | 936375.5 | 9796546  | 7351019  | 67012.68 | 3311092  |
| 1398229  | 1275298  | 0        | 2375.762 | 12959.27 | 1867816  | 2845340  | 1847835  | 408924.9 | 1365853  |
| 544341.2 | 317145.6 | 738890.8 | 815991   | 607897.6 | 849720.2 | 212151.5 | 480257.9 | 74304.83 | 518186.4 |
| 1132485  | 681709.1 | 261634.3 | 312531   | 364331   | 1310246  | 2108581  | 1272608  | 193999.2 | 707106.2 |
| 2902949  | 1452136  | 528553.7 | 496214.2 | 987703.7 | 5157121  | 4090120  | 3229767  | 586581.5 | 2601033  |
| 405637.1 | 253797.9 | 110173.5 | 34351.77 | 395064.8 | 171225.1 | 819376   | 586518.8 | 136241.9 | 358861.3 |
| 362520.9 | 251173.6 | 0        | 7597.421 | 16935.14 | 1149513  | 1688162  | 468760.8 | 45467.45 | 330030.9 |
| 216659.5 | 157562.9 | 184389.3 | 196903   | 193944.3 | 294441   | 452562   | 192908.3 | 85239.22 | 132017.8 |
| 682557.7 | 1367067  | 46513.37 | 5241139  | 1150822  | 146521.7 | 59221.55 | 8699.629 | 125149.4 | 3126867  |
| 3382259  | 2956744  | 3263.026 | 9838.82  | 32908.64 | 4389240  | 7082257  | 5664075  | 884190.8 | 2677981  |
| 217540.9 | 150874.2 | 21687.24 | 6246.488 | 64980.4  | 339026.1 | 369622.4 | 264060.9 | 16380.68 | 140906.5 |
| 901022   | 645980.2 | 119823.8 | 29456.94 | 216712.1 | 1281206  | 1647855  | 831139.1 | 113589.1 | 544076   |
| 12561989 | 14834798 | 853112.6 | 1037723  | 7071178  | 472880.5 | 29644579 | 35331712 | 252839.7 | 3505357  |
| 179202.7 | 43477.72 | 213442.4 | 285775.2 | 335241.2 | 84180.13 | 120622.4 | 163616.6 | 224011.1 | 203424.6 |
| 546334.4 | 330043.8 | 25240.4  | 18526.23 | 167325.5 | 1877664  | 1991134  | 974522.8 | 138827.1 | 464333   |
| 1195919  | 1118887  | 200480.8 | 58323.85 | 478706.7 | 2207868  | 1281888  | 2949832  | 237155.1 | 372713.5 |
| 1832973  | 2118907  | 919402.9 | 483242.3 | 2277699  | 802602.8 | 1869284  | 5173353  | 0        | 0        |
| 1616967  | 1318228  | 132167.1 | 143930.7 | 828800.9 | 9398059  | 2754486  | 1941475  | 47518.7  | 657084.1 |
| 3752565  | 2615634  | 1349920  | 876777.9 | 1969556  | 12820905 | 9202904  | 6430364  | 685458.3 | 1538023  |
| 819385.3 | 737646.4 | 12612.18 | 8299.888 | 41687.23 | 838348.8 | 1860078  | 1730664  | 312054   | 552640.9 |
| 1214733  | 1524453  | 58045.73 | 44933.59 | 87522.86 | 77877.25 | 3262106  | 3514822  | 41504.36 | 411698.2 |
| 81660.08 | 74468.04 | 11916.19 | 6413.416 | 78458.53 | 352560.6 | 157733   | 116147.2 | 40219.07 | 33803.13 |
| 221401.9 | 109187.8 | 15766.08 | 25182.6  | 40544.14 | 454627   | 292247.9 | 159546.1 | 147451.2 | 144788.7 |
| 905810.7 | 890249.3 | 80177.55 | 102206.4 | 63500.68 | 819352.5 | 1982351  | 1609554  | 41062.07 | 451322.7 |
| 2961892  | 1743162  | 1253683  | 1337604  | 2432837  | 7949432  | 6147750  | 3770284  | 636160.3 | 1612033  |

|          |          |          |          |          |          |          |          |          |          |
|----------|----------|----------|----------|----------|----------|----------|----------|----------|----------|
| 649169.5 | 439136.9 | 232305.9 | 62750.01 | 484346.4 | 2411003  | 1382747  | 1172382  | 68720.43 | 342100.3 |
| 546690.4 | 581077.8 | 0        | 0        | 51409.7  | 69733.13 | 1532125  | 1451453  | 25444.16 | 258974.3 |
| 7103854  | 9948840  | 228418.1 | 334859.9 | 8053784  | 92615.06 | 12687448 | 24141776 | 11687.04 | 3005957  |
| 99786.63 | 82387.27 | 35197.43 | 23028.57 | 16885.74 | 90235.33 | 197687   | 210037.5 | 7424.399 | 44749.21 |
| 265126.7 | 252932.5 | 0        | 0        | 4982.77  | 255987.3 | 616133.1 | 562962   | 54542.04 | 204792.5 |
| 14141533 | 15746730 | 724453.4 | 4724167  | 31414586 | 4537836  | 4878161  | 34044761 | 1102112  | 4479450  |
| 720399.5 | 500111.6 | 0        | 4856.348 | 0        | 9067.189 | 2221950  | 1201421  | 0        | 408268   |
| 935358.2 | 902558.7 | 433007.5 | 197800   | 665711.2 | 4554486  | 1295373  | 595769   | 211379.7 | 417396.5 |
| 2237645  | 1856049  | 99746.31 | 110646.6 | 235795.3 | 628016.7 | 6175676  | 5164922  | 670781.9 | 1147271  |
| 26790970 | 17250410 | 2297965  | 1690270  | 6721163  | 50919821 | 37555238 | 38887700 | 4229388  | 12195370 |
| 577623.8 | 548555.7 | 54006.13 | 41740.73 | 315445.9 | 1023977  | 617419.6 | 1369427  | 11405.68 | 131372.5 |
| 454728.3 | 442325.9 | 92142.74 | 19180.53 | 234378.3 | 1141900  | 1944863  | 1125131  | 30208.23 | 132272.8 |
| 494536.1 | 415577.6 | 125241.9 | 246881.8 | 420214.6 | 2000008  | 739779.2 | 481879   | 100115.8 | 163766.1 |
| 2821551  | 5022994  | 0        | 0        | 0        | 234949.2 | 6737083  | 11744308 | 0        | 0        |
| 236591.5 | 226012.7 | 270000.6 | 268175.2 | 80684.46 | 132193.3 | 132383   | 252551.5 | 33842.76 | 34983.98 |
| 590246.7 | 362537.9 | 53517.57 | 29079.45 | 131541   | 1123724  | 851054.5 | 867672.4 | 290161.8 | 160862.5 |
| 89473.73 | 65192.27 | 57702.37 | 61912.59 | 59928.08 | 24728.56 | 146588.4 | 138630.7 | 23402.62 | 66807.26 |
| 358475.6 | 194652.7 | 46520.75 | 63729.56 | 354298.5 | 1767805  | 477165.1 | 254611.5 | 65601.47 | 531768.5 |
| 760333.8 | 390106.5 | 395801.6 | 386298.5 | 494259.9 | 1808392  | 1741860  | 717206.7 | 289164.1 | 516967.2 |
| 357133.4 | 306170.2 | 67234.79 | 49581.37 | 307888.3 | 1134185  | 949446.1 | 865909.7 | 53227.69 | 253940.4 |
| 602660.8 | 278936   | 353798.9 | 456982.2 | 366761.1 | 1367919  | 1147253  | 689222.5 | 330807.1 | 283237.7 |
| 10237310 | 7836110  | 273653.3 | 110972.8 | 1853942  | 9762439  | 23731059 | 19530303 | 2663565  | 8801487  |
| 885726.3 | 542358.5 | 10022.31 | 6770.312 | 69069.75 | 1073640  | 2001162  | 1271677  | 406036.7 | 945147.6 |
| 1980172  | 1691177  | 582945.8 | 292814.8 | 2508851  | 3063534  | 7562995  | 4785613  | 933088.2 | 1902285  |
| 684274.2 | 469157   | 32826.15 | 12634.18 | 123701   | 1372352  | 936525.2 | 945991.5 | 86032.3  | 280738.3 |
| 134784.9 | 104998.9 | 31096.65 | 6788.64  | 84897.94 | 172111.5 | 212914.6 | 179505.1 | 16013.09 | 61876.45 |
| 539657.1 | 184664.3 | 534895.8 | 648306.5 | 677044.8 | 759903.9 | 366942.5 | 805478   | 587915.8 | 527571.3 |
| 226537.6 | 157625.8 | 50864.09 | 38949.74 | 145673.1 | 907447   | 486702.1 | 407338.2 | 30116.86 | 102450.9 |
| 164608.2 | 186318.8 | 2542.91  | 0        | 0        | 7522.065 | 473768.3 | 268900.9 | 6266.009 | 105344.5 |
| 793829.4 | 930679.5 | 537817.1 | 534236.5 | 2787052  | 349477.9 | 1422107  | 2398857  | 28030.94 | 690811.9 |
| 490612.7 | 344507.8 | 127244.6 | 127518.3 | 101343.9 | 652656.7 | 849836.4 | 414472.8 | 38037.68 | 332017.6 |
| 1578756  | 730780.8 | 588771.3 | 337213.6 | 601362.6 | 10556036 | 1391366  | 1485695  | 640116.4 | 1220950  |
| 408040.9 | 268877.7 | 55065.59 | 16599.49 | 250142.4 | 855500.6 | 343885   | 624804.5 | 38086.26 | 219575.4 |
| 11885328 | 13853939 | 353248.5 | 154245.8 | 190367.4 | 1050811  | 33364237 | 36002791 | 6810893  | 8748840  |
| 590928.8 | 1191850  | 71417.7  | 4412779  | 983128.5 | 110320.3 | 68557.54 | 28260.71 | 72169.48 | 2722514  |
| 332151.4 | 241919.1 | 0        | 7750.897 | 45618.98 | 1498852  | 1022652  | 183609.2 | 212645   | 347829.7 |
| 15127098 | 14740940 | 1247894  | 681261.1 | 2962035  | 8366127  | 1.41E+08 | 23665570 | 35273.95 | 3064412  |
| 635826.1 | 495796.1 | 246077.1 | 125528.7 | 603464   | 2121926  | 1248395  | 796368   | 88614.68 | 219899.6 |
| 1232501  | 1151740  | 112473   | 106841.7 | 297562.4 | 2309054  | 1508150  | 1837084  | 63197.79 | 483285.8 |
| 272327.3 | 269629.1 | 41264.61 | 105665.9 | 138817.5 | 344225.3 | 359733.4 | 736613.6 | 46205.75 | 184906   |
| 185399.4 | 179650.9 | 13666.79 | 7559.798 | 207413.3 | 959833.3 | 263839.5 | 176298   | 5713.325 | 39509.16 |
| 2977760  | 2175452  | 419081.5 | 331625.6 | 1268774  | 11403057 | 8308054  | 4383454  | 150465.9 | 1178906  |
| 257179.6 | 247047.2 | 9966.885 | 0        | 8790.14  | 21806.11 | 749397.3 | 665062.7 | 185770.4 | 273287.3 |
| 281250   | 188275.8 | 9629.599 | 5638.7   | 98612.24 | 319083.2 | 595435.8 | 416743   | 5851.596 | 170673.1 |
| 2623602  | 2581147  | 117707.3 | 16120.57 | 67582.38 | 1790562  | 6559066  | 6475109  | 444219.7 | 1367718  |
| 1079256  | 703169.7 | 76635.71 | 46917.12 | 60652.3  | 698446.6 | 2833829  | 2226494  | 803368.8 | 786800.6 |
| 184282   | 93984.16 | 72468    | 90449.32 | 213605.4 | 243774.1 | 568980.4 | 249000.2 | 39045.71 | 267430.2 |

|          |          |          |          |          |          |          |          |          |          |
|----------|----------|----------|----------|----------|----------|----------|----------|----------|----------|
| 1377701  | 1022874  | 472325.7 | 420914   | 551924   | 5386444  | 3006434  | 993993.9 | 322137   | 637322.6 |
| 206435   | 146182.9 | 31311.98 | 12331.84 | 153931.4 | 804231.5 | 481307.6 | 247685   | 4875.241 | 112344.2 |
| 8907035  | 7217261  | 204092.9 | 80754.52 | 1632995  | 10002288 | 19375675 | 16000829 | 2277211  | 7118073  |
| 8122680  | 5338547  | 592834   | 489989.9 | 1881846  | 15681818 | 11373278 | 11921956 | 1170051  | 3522593  |
| 464314.5 | 315954.9 | 138624.4 | 123594.9 | 199544.5 | 592668.1 | 753873.4 | 471943.7 | 49943.32 | 270240.3 |
| 1048150  | 1038841  | 15275.22 | 6084.593 | 15490.84 | 1125425  | 2331322  | 1828428  | 106764.3 | 777780.7 |
| 266131.7 | 247594.8 | 0        | 3193.267 | 9415.23  | 335987.5 | 558063.8 | 431585.9 | 44714.27 | 257811.1 |
| 8092703  | 10529004 | 8703.431 | 5692.629 | 106960.6 | 556105.1 | 22483386 | 24475180 | 0        | 2310727  |
| 559611.2 | 59929.43 | 386641   | 860573.4 | 523791.3 | 302689.9 | 450389.5 | 636131   | 593874.5 | 480239.7 |
| 2736618  | 542138.1 | 1266466  | 1798726  | 2793238  | 3599997  | 2924709  | 3195214  | 1852280  | 2651673  |
| 1217463  | 745075.5 | 138334.5 | 90583.44 | 323271.3 | 2037152  | 2000605  | 1175971  | 210643.4 | 967205.4 |
| 202813.1 | 139804.7 | 3915.476 | 0        | 5280.971 | 341141.2 | 1456844  | 324353.8 | 6028.799 | 194259.5 |
| 468368.4 | 305320.7 | 33331.07 | 34873.15 | 267618.6 | 592143.8 | 852339.4 | 781591.1 | 17259.18 | 345819.6 |
| 20553422 | 11617366 | 3946526  | 4391205  | 10179336 | 32419711 | 30168700 | 29323116 | 4388360  | 12049419 |
| 4012475  | 3536778  | 3512.293 | 5125.514 | 207482.9 | 3152033  | 10040979 | 6962466  | 707419   | 4158716  |
| 718015.4 | 621884.2 | 0        | 6158.78  | 72751.83 | 549902.5 | 1787931  | 1257195  | 111040.3 | 667341.8 |
| 207644.2 | 205127.5 | 19746.77 | 35885.46 | 0        | 12110.18 | 582460.3 | 547174.5 | 23715.35 | 87306.9  |
| 714105.9 | 448609.8 | 149007.6 | 71317.3  | 224262.1 | 1678229  | 3203295  | 964845.5 | 187855.9 | 380245.5 |
| 335812.1 | 175634.4 | 109499.3 | 336573   | 389273.4 | 662223.6 | 502321.2 | 306143.6 | 214718.4 | 353231.4 |
| 1069421  | 729859.2 | 198223.5 | 123122.4 | 482500.2 | 120894.5 | 2789410  | 1957977  | 0        | 1124445  |
| 567446.9 | 459814.6 | 110034.4 | 105300   | 82580.52 | 871827.9 | 916484.5 | 1354516  | 249541.8 | 260888.5 |
| 7889952  | 9721755  | 441186.9 | 292720.1 | 5870274  | 105924.4 | 18016241 | 20427491 | 0        | 1645173  |
| 97451963 | 65190834 | 13266290 | 12501130 | 35815935 | 1.71E+08 | 1.37E+08 | 1.27E+08 | 9579106  | 47589473 |
| 572040.1 | 315979.7 | 96245.7  | 308487.4 | 170245.7 | 882851   | 824979   | 893211.9 | 365778.7 | 182868.6 |
| 842626.3 | 664459.6 | 8311.956 | 7545.447 | 13462.32 | 487178.5 | 2282773  | 1057978  | 107741.2 | 907609   |
| 258198.1 | 171860.1 | 0        | 0        | 32319.66 | 296046.6 | 592029.5 | 344129.9 | 19820.41 | 136117   |
| 111201.6 | 97105.63 | 38891.27 | 31390.81 | 17528.02 | 43807.79 | 258395.7 | 275481.1 | 16442.9  | 84491.03 |
| 1441198  | 798553.4 | 1257419  | 284925.5 | 986390.3 | 3420822  | 3174139  | 1845727  | 377857.5 | 928394   |
| 1259073  | 427147.5 | 395885.9 | 309105.8 | 984602.3 | 838560.2 | 2561377  | 1170527  | 805502.6 | 951229.8 |
| 1581654  | 1052307  | 159988.4 | 192573   | 657272.9 | 2714950  | 2288741  | 2185242  | 160617.4 | 751895.1 |
| 386933.7 | 248772.3 | 10686.15 | 2746.362 | 96979.49 | 677320.5 | 644251.8 | 366444.5 | 48644.84 | 299278.7 |
| 13836117 | 9516466  | 1096196  | 632624.1 | 3295588  | 27392370 | 18549399 | 20007315 | 2057412  | 5363236  |
| 764946.5 | 972214.1 | 12719.97 | 19560.47 | 34627.6  | 946248.5 | 1420231  | 2440088  | 103975.7 | 410333.3 |
| 2259436  | 914339.6 | 289418   | 280911   | 461693.1 | 988217   | 6062462  | 3334633  | 1557723  | 1462880  |
| 820357.1 | 600891.9 | 243728.5 | 261227.3 | 895014.8 | 2313545  | 1677149  | 1015598  | 94864.4  | 362441.4 |
| 1229615  | 1608494  | 10449.6  | 119228   | 478436.2 | 2117324  | 7816840  | 3690408  | 36262.36 | 79136.43 |
| 13213386 | 12563022 | 5038352  | 30687457 | 32015949 | 6810987  | 12799819 | 35237541 | 4644237  | 7026693  |
| 15863232 | 10311396 | 6521043  | 13886636 | 16340662 | 33261295 | 26730960 | 17816771 | 3154463  | 8878362  |
| 2989750  | 2329985  | 44645.81 | 10841.78 | 139717.7 | 4249863  | 6133209  | 4677115  | 497633   | 2102202  |
| 88192.38 | 55262.68 | 30622.58 | 19120.82 | 144036.8 | 120929.8 | 259530.4 | 101333.7 | 14006.23 | 83068.28 |
| 259643.6 | 181683.8 | 168499.6 | 195384.4 | 200432.1 | 325522.9 | 176359.6 | 257909.7 | 107440.5 | 75482.58 |
| 718718.4 | 475672.9 | 120030.6 | 63702.03 | 197624.7 | 443073.1 | 1759377  | 1126825  | 129316.4 | 508456.8 |
| 534703.3 | 533313.2 | 156162.2 | 38668.66 | 279924.8 | 887009.3 | 562415   | 558359.6 | 48844.16 | 212899.4 |
| 3370728  | 2028605  | 454932.7 | 213239.2 | 931659.7 | 5448276  | 5741069  | 3924483  | 645003.3 | 2018556  |
| 219792.5 | 137267.3 | 77166.65 | 58582.37 | 137273.6 | 317247.8 | 293414.6 | 250825.2 | 49665.07 | 131683.2 |
| 625379   | 851772.6 | 0        | 0        | 3160.741 | 8494.624 | 1755610  | 2137186  | 210872.2 | 310233.3 |
| 234718.2 | 207746   | 49216.62 | 8287.138 | 180888.8 | 1065183  | 444805.6 | 112676.5 | 39213.48 | 109451.2 |

|          |          |          |          |          |          |          |          |          |          |
|----------|----------|----------|----------|----------|----------|----------|----------|----------|----------|
| 2923353  | 2738151  | 147159.3 | 14121.21 | 141962.9 | 509200.3 | 8407740  | 7183578  | 797512.7 | 1770678  |
| 7918256  | 12421597 | 31680.02 | 4143.298 | 0        | 3597369  | 18487694 | 28908716 | 9641.913 | 0        |
| 354691.5 | 354457.5 | 313372.3 | 316840.8 | 906249.7 | 397958.9 | 351686.5 | 337354.7 | 205854.5 | 114906.3 |
| 4019105  | 857660.1 | 2950387  | 3739417  | 3603758  | 4956161  | 3520168  | 3737784  | 3119552  | 5419043  |
| 992002.6 | 961127.1 | 2692.429 | 3950.48  | 13612.32 | 1611674  | 1766914  | 2166831  | 136583.1 | 517496.2 |
| 1027767  | 972942.7 | 8291.213 | 8679.185 | 45548.3  | 1318155  | 2140550  | 1626058  | 152714.2 | 565389.1 |
| 9655012  | 10973518 | 9629.052 | 9867.019 | 0        | 767400.7 | 28034966 | 21620935 | 0        | 3957660  |
| 176214.2 | 146845.4 | 118433.9 | 100614.1 | 160688.2 | 107409.1 | 791219.7 | 151193.3 | 395623.2 | 45239.81 |
| 821951.1 | 779581.4 | 151218.2 | 134493.3 | 678036.4 | 1437474  | 598760.5 | 149246.7 | 119531   | 837829.6 |
| 279215.5 | 242760.5 | 6467.602 | 0        | 0        | 0        | 856062.7 | 559682   | 76577.97 | 145459.6 |
| 237210.5 | 117018.7 | 119100.5 | 133477   | 128936.8 | 122750.9 | 459470.2 | 292623.6 | 60903.88 | 178249.6 |
| 5717261  | 6038670  | 539080.6 | 574123.3 | 2002337  | 7514871  | 9347098  | 5100432  | 463325.5 | 1582952  |
| 242249.7 | 94064.09 | 242939.2 | 161820.8 | 278419.4 | 395502.1 | 280140.1 | 260830.5 | 233820.4 | 97061.39 |
| 1299257  | 727120.3 | 52016.99 | 67663.34 | 91346.23 | 1536094  | 2985113  | 1825014  | 227518   | 957056.1 |
| 87292.74 | 74753.61 | 0        | 10825.49 | 61557.07 | 255498.5 | 297185.7 | 197080.6 | 18631.1  | 31618.59 |
| 17065829 | 17389896 | 271559.6 | 185185   | 15486922 | 2305459  | 38963946 | 9514104  | 1023256  | 4044167  |
| 335010.8 | 321052.5 | 0        | 0        | 0        | 428036.9 | 711314.5 | 462126.8 | 10499.3  | 9299.937 |
| 917265.3 | 629425.7 | 114378.7 | 117667.1 | 173422.8 | 1924676  | 1061125  | 1333912  | 166590.9 | 302024.9 |
| 505593   | 279498.8 | 219983.2 | 204833.6 | 355161.5 | 569547.2 | 751085.4 | 351283.1 | 142086.5 | 523524.9 |
| 3072594  | 2938184  | 903718.7 | 473549.3 | 1814149  | 13124242 | 6235121  | 1432396  | 333262.7 | 1424919  |
| 17597735 | 15520098 | 28409.16 | 20171.49 | 307656   | 29247184 | 31800698 | 35669701 | 3245224  | 15500068 |
| 83304.42 | 79806.74 | 2903.781 | 6243.741 | 28635.69 | 69750.39 | 181854.7 | 47571.01 | 7652.11  | 60008.07 |
| 169556.9 | 116147.9 | 110235.4 | 138867.4 | 35654.23 | 287592.2 | 101337.6 | 311089.3 | 67574.03 | 75567.45 |
| 1694658  | 1177816  | 210581.7 | 356399.7 | 844842.5 | 7872356  | 3307787  | 2404139  | 153386.7 | 697900.6 |
| 60273.54 | 59984.39 | 2095.904 | 0        | 37048.05 | 233897.6 | 173418.9 | 103835.8 | 0        | 22568.59 |
| 2392038  | 2033931  | 153893.5 | 289388.9 | 927982.6 | 1041169  | 5885719  | 2409430  | 540969.7 | 3121056  |
| 3125168  | 2717193  | 47736.81 | 20598.34 | 100432.2 | 3335423  | 7243885  | 6524599  | 627764.4 | 1714509  |
| 782119.3 | 252267.6 | 444677.9 | 1095438  | 397832.5 | 1476417  | 1123601  | 1060756  | 418981   | 778041.4 |
| 370339.6 | 179448.7 | 170611   | 93427.55 | 185497.7 | 179858.2 | 815314.3 | 579192   | 87629.16 | 350739.1 |
| 2995435  | 2031545  | 883792.2 | 515478.8 | 2399577  | 1709315  | 5994983  | 2727929  | 653683.6 | 1564456  |
| 1.04E+08 | 1.31E+08 | 3399328  | 2244844  | 33846023 | 36116785 | 2.5E+08  | 3.03E+08 | 101451.7 | 18176020 |
| 409041   | 275628.8 | 158913   | 206205.1 | 228696.1 | 905593.9 | 1193106  | 566616.3 | 97182.29 | 156794.5 |
| 136178.8 | 112388.5 | 4756.569 | 10330.33 | 86430.88 | 226278.9 | 178793.2 | 195033.6 | 0        | 73643.35 |
| 1191554  | 737541.8 | 135226.7 | 86281.41 | 323909.4 | 2003830  | 1968082  | 1134919  | 186512.9 | 956762.9 |
| 10230230 | 8679850  | 1865039  | 543689.1 | 317478.5 | 2263347  | 28634126 | 24699577 | 9726366  | 6289646  |
| 554667.6 | 363634.9 | 40473.86 | 54088.94 | 502829.1 | 209065   | 1244506  | 827495.3 | 172887.6 | 176616   |
| 12425666 | 7575236  | 1719108  | 732799.5 | 3736200  | 19001398 | 22107242 | 14346470 | 2214276  | 7335391  |
| 507975.9 | 615549.1 | 321681.9 | 358582   | 58952.34 | 503950.5 | 529422.5 | 1593596  | 191076.4 | 93511.89 |
| 264990.7 | 203873   | 23689.21 | 19642.27 | 55166.89 | 556614.9 | 308089.3 | 373908.2 | 34159.2  | 87718.95 |
| 463970.2 | 575582.8 | 40882.99 | 0        | 170417.6 | 963655.5 | 335029.3 | 909488.2 | 45685.58 | 21381.17 |
| 2926140  | 3030724  | 691745.9 | 126270.5 | 1563897  | 2147599  | 5749779  | 8073387  | 0        | 2044077  |
| 3320095  | 2503157  | 100522.3 | 207897.9 | 2134350  | 3022952  | 6836148  | 4519723  | 564700.7 | 928069.8 |
| 5350932  | 8866559  | 803046.7 | 613701.2 | 7465401  | 1341040  | 38044208 | 2120428  | 1440053  | 309705.6 |
| 51080.27 | 112890.7 | 127442   | 68738.24 | 221070.4 | 6804.368 | 0        | 253016.9 | 0        | 0        |
| 770439   | 522818.1 | 213958.2 | 57842.61 | 700985.5 | 2959143  | 1442369  | 1522366  | 189131.7 | 367178.6 |
| 189045.7 | 122539.1 | 78008.12 | 79620.08 | 42188.85 | 537249.5 | 546415.8 | 219873.9 | 45368.46 | 83701.32 |
| 407308.2 | 339406.4 | 37255.62 | 17062.91 | 28009.14 | 226554.7 | 1071703  | 826535.8 | 140787.6 | 278091.4 |

|          |          |          |          |          |          |          |          |          |          |
|----------|----------|----------|----------|----------|----------|----------|----------|----------|----------|
| 687145.5 | 741297.5 | 42002.1  | 5580.832 | 745213.3 | 871754.7 | 3803948  | 1889068  | 35119.84 | 634371.5 |
| 110823.1 | 89049.78 | 12307.16 | 12877.97 | 57998.35 | 571498.1 | 197949.7 | 141204   | 4010.971 | 29133.85 |
| 888925.9 | 448235.4 | 3129337  | 709403.9 | 1120781  | 147186.8 | 787274   | 1426121  | 1174964  | 605271.6 |
| 98531.59 | 81489.36 | 2868.37  | 23526.42 | 50513.38 | 439960.5 | 212038.3 | 88484.19 | 5332.589 | 45607.11 |
| 418875   | 243120.9 | 208052.2 | 273853.5 | 213014.7 | 239878.9 | 766058.6 | 751085.3 | 153601   | 208320.5 |
| 256667.9 | 183400.6 | 29201.28 | 12425.74 | 76800.56 | 438973.4 | 403537.7 | 342765.6 | 47170.06 | 135130   |
| 33477581 | 30289052 | 169198.3 | 18252.91 | 836444.2 | 3522762  | 1E+08    | 71924225 | 2951511  | 16785536 |
| 314376.7 | 141187.2 | 81593.32 | 46761.51 | 149896.9 | 607269.4 | 367792.9 | 327680.9 | 80292.67 | 320430   |
| 292444.8 | 234458.3 | 9435.503 | 2036.021 | 9752.916 | 116252.7 | 828913.3 | 552167   | 63259.89 | 144984.8 |
| 576742   | 363006.3 | 59114.68 | 219300   | 610978.7 | 1486062  | 1378588  | 718026.7 | 54953.82 | 372189.9 |
| 197660.3 | 170340.6 | 0        | 0        | 11989.17 | 187264.6 | 479658.6 | 379066.6 | 56018.06 | 71851.19 |
| 580645.5 | 496425.5 | 189143   | 96383.14 | 747231.5 | 708470.6 | 2371210  | 1416405  | 298903.4 | 606109.2 |
| 1760464  | 1204012  | 240923.4 | 245784.8 | 994782.9 | 7332682  | 3851970  | 2287158  | 53696.94 | 961454.2 |
| 16432357 | 14736292 | 3969787  | 2616593  | 10968644 | 7582301  | 34484613 | 34367926 | 667120.9 | 11625289 |
| 547210.6 | 293034.8 | 64534.98 | 21174.31 | 122985.6 | 1754733  | 1990084  | 722380.4 | 271338.4 | 801407.1 |
| 582423.3 | 516290.7 | 108865.6 | 118477.1 | 414142.9 | 2109150  | 1340454  | 789781.8 | 62691.21 | 334340.7 |
| 2886863  | 1899165  | 471950.8 | 333181.1 | 1644095  | 1401979  | 6810875  | 2884986  | 261924.4 | 2667308  |
| 191675.1 | 164721   | 46488.37 | 11331.3  | 106333.5 | 791765.3 | 433326   | 315966.5 | 8867.527 | 92284.82 |
| 176627.5 | 150252.6 | 32791.82 | 79898.99 | 63101.95 | 148817.5 | 336951.5 | 340595.1 | 18206.48 | 99829.1  |
| 3194240  | 4242447  | 6426.788 | 0        | 69498.42 | 295376.9 | 8963394  | 10283570 | 0        | 1766737  |
| 465522.8 | 368225.3 | 189341.3 | 172069.5 | 212417.8 | 578965.5 | 669864.2 | 577724.8 | 154469.1 | 257184   |
| 856375.9 | 611621.5 | 199135.8 | 79379.65 | 492947.8 | 1014220  | 1518364  | 868582.5 | 61934.72 | 502457.6 |
| 215113.4 | 169781.4 | 117257.7 | 38149.94 | 228421.5 | 389393   | 637912.2 | 420149.1 | 23301.29 | 210857.1 |
| 171032.4 | 170105   | 121423.6 | 95057.59 | 106316.8 | 709107   | 182715.8 | 421545.4 | 11164.84 | 50485.18 |
| 408980   | 345270.9 | 34736.99 | 7468.797 | 224340.9 | 789844.9 | 447325.8 | 909525.6 | 29218.81 | 148317   |
| 201668.5 | 212294.6 | 6418.799 | 3877.828 | 0        | 19428.17 | 593407.9 | 137080.5 | 68721.8  | 251614.4 |
| 360612.9 | 285330   | 125761.6 | 104112.5 | 149221.8 | 277075.6 | 711337.7 | 692107.6 | 70903.69 | 248648.4 |
| 1228817  | 289138.7 | 1224878  | 1148997  | 1185798  | 1140423  | 1966764  | 1457049  | 975400.9 | 1332676  |
| 4268488  | 2927796  | 342421.7 | 231555.5 | 1013599  | 8461701  | 5857874  | 6253304  | 651578   | 1754082  |
| 388942   | 347011   | 39166.28 | 14465.76 | 85007.33 | 682232.8 | 583349.1 | 498237.3 | 22808.13 | 179367.4 |
| 11634165 | 2404274  | 8925457  | 10566720 | 12847606 | 8460834  | 13591081 | 15474900 | 9939346  | 9295889  |
| 535617.5 | 416825.3 | 121864.1 | 146895.9 | 179841   | 1063479  | 508192.9 | 1046394  | 74003.66 | 137763.7 |
| 3982160  | 3156123  | 5148678  | 2093000  | 10378967 | 1324050  | 6446578  | 9274467  | 835965.1 | 3731247  |
| 702399.1 | 561291.2 | 54210.27 | 11601.8  | 72345.06 | 254205.4 | 1965243  | 1506930  | 231850   | 571817.1 |
| 455633.9 | 396335.3 | 96554.49 | 97545.14 | 78372.19 | 667498.9 | 745601   | 925999.6 | 75189.22 | 156352.6 |
| 3451230  | 2119999  | 528113.1 | 233249.4 | 1442980  | 4418733  | 6652720  | 3854887  | 1141788  | 2665885  |
| 683095.6 | 707073.2 | 10545.29 | 6375.607 | 90627.1  | 1659874  | 3680332  | 502952.1 | 57873.18 | 1240092  |
| 7455254  | 5002386  | 604863.7 | 431425.7 | 1797768  | 14283262 | 10833321 | 10484207 | 1036594  | 3180854  |
| 1035979  | 323950.6 | 849662.3 | 1175992  | 1091041  | 555744.5 | 1043785  | 1587465  | 1042790  | 792997.7 |
| 1452664  | 1030181  | 134125.7 | 41350.53 | 310515.1 | 2484140  | 2441180  | 1361528  | 197705.1 | 859239.1 |
| 278307.4 | 185264.6 | 211720.2 | 213752.3 | 166172   | 633509.1 | 479780.5 | 155912.4 | 135995.4 | 172322.4 |
| 6.29E+08 | 7.65E+08 | 34980702 | 22018677 | 61907583 | 4.17E+08 | 1.49E+09 | 1.91E+09 | 1828981  | 6.92E+08 |
| 2393605  | 1310405  | 1582341  | 832947.3 | 1537195  | 4601140  | 6628205  | 3612067  | 767985.2 | 1247061  |
| 26154631 | 16742424 | 2509726  | 1875882  | 7506866  | 47653536 | 39792982 | 37191146 | 4175642  | 14650331 |
| 526398.8 | 325373.2 | 168224.8 | 232267.8 | 232644.7 | 401340.1 | 1046105  | 740486   | 115971.5 | 252838.9 |
| 963033   | 532543.4 | 136787.1 | 32196.68 | 244553.3 | 1770953  | 1506833  | 1136410  | 215231.5 | 623973.1 |
| 499783.2 | 299757.8 | 99301.63 | 116729.8 | 168469.3 | 380800.4 | 1132679  | 620071.7 | 111207.1 | 311632.4 |

|          |          |          |          |          |          |          |          |          |          |
|----------|----------|----------|----------|----------|----------|----------|----------|----------|----------|
| 739818.9 | 337576.2 | 428647.5 | 533927.4 | 593933.5 | 1796723  | 1100261  | 688794.6 | 321399.3 | 565565.9 |
| 1147186  | 898325.9 | 42312.39 | 26235.23 | 93266.92 | 1222937  | 2686241  | 1893475  | 212566.7 | 817475   |
| 894461   | 694588.3 | 243762.4 | 523845.4 | 932683.2 | 1885854  | 2105253  | 1028500  | 361454.5 | 326092.6 |
| 190427.7 | 310392.8 | 3367.494 | 0        | 4916.317 | 445049.1 | 1185282  | 48504.32 | 0        | 72927.1  |
| 7466028  | 5008825  | 592670.4 | 400462.6 | 1707778  | 14826172 | 10401937 | 10953751 | 1040200  | 3080010  |
| 146426.1 | 123438   | 28991.47 | 20682.45 | 49398.95 | 168029   | 277350.9 | 224508.9 | 0        | 167602.7 |
| 321898.6 | 230760.4 | 47942.96 | 64597.62 | 33813.37 | 269649.3 | 757940.9 | 361075.2 | 41881.43 | 167148.1 |
| 6222677  | 5023046  | 603088.9 | 546551.5 | 1325886  | 11436697 | 9017999  | 4465007  | 451294.2 | 3291386  |
| 419270   | 115779.5 | 355857.2 | 54456.21 | 118880   | 474427.4 | 2078558  | 335003.3 | 573729   | 344176   |
| 144835.8 | 148694.4 | 0        | 2692.329 | 6526.95  | 113616.7 | 359500.7 | 247338.8 | 40295.97 | 85529.04 |
| 366587.4 | 408279.5 | 18084    | 36222.15 | 113874.7 | 1733936  | 906716.7 | 986956.1 | 20957.81 | 73107.96 |
| 4629404  | 4422188  | 2105149  | 1835730  | 3230577  | 21238766 | 5372533  | 3056200  | 809667.1 | 2237808  |
| 674278.6 | 1262809  | 5433.328 | 5989.712 | 0        | 138767.7 | 1580439  | 2919651  | 0        | 0        |
| 9334101  | 9103295  | 153927.9 | 13098.76 | 501450.1 | 2064426  | 27079708 | 22643169 | 897862.7 | 3908438  |
| 65392.38 | 42611.83 | 0        | 0        | 121549.5 | 117458.3 | 197315.4 | 74569.88 | 0        | 107422.3 |
| 79572.77 | 48425.64 | 55160    | 61333.22 | 21475.63 | 72944.64 | 352756.1 | 105041.3 | 9080.153 | 54887.19 |
| 1514674  | 2406490  | 928716   | 860609.5 | 1084877  | 633621.6 | 1241659  | 5765772  | 34257.87 | 327541.9 |
| 25799976 | 14802672 | 5069569  | 4462248  | 12001046 | 28453278 | 51144849 | 38291327 | 4534381  | 16622308 |
| 15401742 | 10055504 | 3216367  | 2829267  | 7759785  | 16589583 | 29618354 | 26078408 | 2883311  | 7460327  |
| 44882699 | 19211449 | 14164497 | 22860977 | 38457991 | 53041461 | 64200007 | 61983084 | 15424327 | 38470753 |
| 2827814  | 2383246  | 216777.9 | 269516   | 1184932  | 4952332  | 3885999  | 2419626  | 304958.2 | 1042851  |
| 94720.58 | 64577.76 | 165159.4 | 293389.1 | 41665.32 | 53210.34 | 61920.77 | 187053.1 | 108322.1 | 91603.45 |
| 475670.1 | 703271.5 | 49771.02 | 52515.3  | 107563.4 | 749968   | 536412.3 | 242310.2 | 33786.63 | 68397.93 |
| 232115.6 | 276844.3 | 2440.728 | 7153.355 | 11571.42 | 274851.1 | 472592   | 719465.3 | 28906    | 145689.3 |
| 1347618  | 1319132  | 88988.57 | 72540.69 | 67799.74 | 2253888  | 2262157  | 2884326  | 156363.5 | 523520.4 |
| 2018839  | 822986.7 | 732726.5 | 3184094  | 2244716  | 1394510  | 1099861  | 1164033  | 2178969  | 3343391  |
| 275346.4 | 350775.8 | 32486.58 | 0        | 85307.61 | 519445.6 | 274833.5 | 381140.8 | 57895.59 | 13505.83 |
| 3457213  | 1909737  | 85502.7  | 52810.49 | 557680.1 | 4644219  | 7559662  | 5333012  | 721404.1 | 2675423  |
| 669783.4 | 392146.5 | 182868.2 | 194921.5 | 175433.6 | 2096676  | 1927710  | 1059782  | 228638.6 | 500725.7 |
| 261879.7 | 209120.6 | 11702.05 | 7001.484 | 59965.42 | 490707.5 | 392297.7 | 430254.5 | 0        | 111673.9 |
| 279807.2 | 384951.3 | 269253   | 231649.5 | 126658.9 | 238275.2 | 79906.2  | 967994.3 | 111181.3 | 119776.1 |
| 156104.4 | 148667.3 | 0        | 0        | 3135.1   | 276094.2 | 267265.8 | 195125.8 | 5568.021 | 45510.3  |
| 694177.3 | 757917.1 | 56373.27 | 169697.2 | 44052.01 | 5570700  | 521027.4 | 1765791  | 73250.34 | 248198.3 |
| 2152768  | 2100899  | 2434.474 | 0        | 9592.547 | 2536024  | 4845269  | 3451134  | 481969.7 | 1441575  |
| 157751.9 | 99474.33 | 18052.88 | 21003.68 | 166245.4 | 546231.8 | 313508.8 | 234608.9 | 11154.16 | 97105.99 |
| 59626.29 | 67614.95 | 4436.742 | 4550.203 | 86659.09 | 284136.3 | 68100.85 | 17788.27 | 0        | 17545.47 |
| 15252122 | 10335555 | 1588918  | 1058091  | 4738255  | 28512992 | 22038089 | 24423089 | 2053496  | 8167114  |
| 291387   | 214180.1 | 0        | 8419.032 | 34998.3  | 509135   | 517075.1 | 243185.4 | 86987.14 | 102150.2 |
| 80477.1  | 93701.09 | 24127.12 | 2528.347 | 25569.25 | 366332.7 | 187793.7 | 241883.5 | 0        | 39772.11 |
| 282441.3 | 282165.2 | 0        | 0        | 20200.12 | 68696.75 | 817034.9 | 194675.8 | 34117.18 | 52409.36 |
| 7892001  | 7945294  | 1042375  | 683525.1 | 8071815  | 490382.6 | 17198924 | 16735260 | 11975.69 | 3975961  |
| 1008346  | 933283.5 | 147332   | 100199.3 | 164326.4 | 310915   | 2692916  | 2464471  | 293573.7 | 942500.1 |
| 527344.1 | 68785.44 | 374020.8 | 523745.1 | 938395.2 | 600016.2 | 459838.2 | 497273.9 | 455204.3 | 504236   |
| 73135.9  | 47070.23 | 2919.448 | 21026.99 | 115779.2 | 152779.5 | 174370.7 | 138106.8 | 9688.621 | 53767.45 |
| 330998.3 | 122303.1 | 242960.9 | 262372.3 | 109078.3 | 250448.2 | 560941   | 361167.9 | 239348.8 | 191236.2 |
| 459682.3 | 291101   | 76310.24 | 53433.32 | 224065.5 | 502944.2 | 924496.2 | 380540.9 | 78853.27 | 361221.2 |
| 821956.6 | 518889.9 | 47730.73 | 111093.8 | 159200.5 | 1742480  | 1038587  | 1109540  | 166199.6 | 357383.3 |

|          |          |          |          |          |          |          |          |          |          |
|----------|----------|----------|----------|----------|----------|----------|----------|----------|----------|
| 199578.9 | 195711.5 | 13628.39 | 0        | 49937.92 | 449151.7 | 185263.6 | 272202.9 | 0        | 8342.419 |
| 1398110  | 848765.8 | 192447.2 | 189748.9 | 782440.8 | 633235.3 | 3416141  | 1382789  | 406666.2 | 1208080  |
| 13225616 | 11093885 | 15350054 | 8145098  | 35339252 | 3830753  | 21837795 | 27783883 | 274281.7 | 21321548 |
| 1436836  | 246949   | 1298959  | 1571833  | 783520.9 | 2712770  | 1664078  | 1127212  | 1810423  | 1354244  |
| 132733.2 | 173272   | 55512.42 | 41224.07 | 80824.49 | 129957.5 | 152187   | 119979.6 | 21955.96 | 62493.39 |
| 376797.6 | 236299.1 | 177501.6 | 259123.6 | 647289.2 | 950140.8 | 294452   | 545116.7 | 103813.1 | 141073.9 |
| 2401113  | 1213727  | 835791   | 341769.3 | 1597566  | 8967513  | 4534357  | 2738941  | 600148.1 | 1841976  |
| 258619.4 | 217617.1 | 0        | 0        | 51025.21 | 393687   | 493667.8 | 509163.9 | 4802.95  | 86477.03 |
| 369604.9 | 225229.8 | 56238.94 | 76427.77 | 418694.9 | 1260155  | 645979.4 | 473404.9 | 45861.86 | 226925.7 |
| 1257693  | 951813.5 | 109205.6 | 42332.17 | 326873.5 | 2806627  | 1338334  | 1686257  | 117466.1 | 476429.2 |
| 311433   | 242313   | 43824.96 | 31279.81 | 119221   | 442164.8 | 545436.3 | 568473.8 | 23462.73 | 85143.26 |
| 2167369  | 1710673  | 190617.7 | 210698.4 | 1491617  | 10943618 | 3405577  | 4293681  | 130187.6 | 819558.4 |
| 111765.3 | 23313.41 | 63922.48 | 32438.98 | 58474.86 | 212531.8 | 107267.2 | 124156.7 | 71939.12 | 112789.5 |
| 235394.3 | 108104.4 | 3744.917 | 82073.52 | 48594.2  | 486767   | 299327.3 | 169969.7 | 158585.9 | 269998.7 |
| 629835.9 | 659415.9 | 83009.64 | 9324.038 | 241104   | 1085967  | 830872.9 | 688325.9 | 132217.3 | 139310.4 |
| 243516.9 | 117011.9 | 0        | 6106.972 | 4023.037 | 292556.2 | 593206.1 | 325564.6 | 162044.6 | 235274.3 |
| 364643.6 | 219117.7 | 94117.49 | 81519.45 | 110313.2 | 341174.7 | 785942   | 460128.3 | 83634.02 | 211431.4 |
| 206919   | 157485.6 | 68858.36 | 73859.39 | 107191.2 | 266603.5 | 304715.5 | 344504.6 | 34432.35 | 41371.57 |
| 17761207 | 11857114 | 3539513  | 1438051  | 6066718  | 21271032 | 35785341 | 24563806 | 3237120  | 11347778 |
| 2077031  | 1363019  | 169890.5 | 70764.3  | 442829.9 | 4247899  | 2882923  | 3342909  | 312607.6 | 999069.1 |
| 221193.1 | 210204.4 | 34762.53 | 69195.9  | 243181.8 | 882152.5 | 319560.5 | 234527.9 | 30968.07 | 95218.95 |
| 275417.1 | 188850.3 | 11292.62 | 26579.21 | 17298.34 | 188782.3 | 732795.3 | 550811.3 | 112144   | 250304.1 |
| 10925413 | 10510535 | 6535262  | 3821827  | 13863678 | 2931041  | 14333858 | 27186915 | 223350.2 | 14975196 |
| 27714447 | 32566150 | 55240.91 | 102678.6 | 6898674  | 1869162  | 78059230 | 53427078 | 0        | 2655315  |
| 101366.9 | 112917.3 | 2585.735 | 6547.866 | 0        | 115546.2 | 218940.7 | 190144   | 0        | 35666.27 |
| 13155586 | 13513388 | 1375266  | 1653980  | 5897787  | 1281512  | 1.14E+08 | 32677528 | 0        | 3450875  |
| 372207.9 | 249989.2 | 62660.25 | 113727   | 223316.1 | 1454150  | 717641.1 | 360273.4 | 91235.67 | 162600.6 |
| 458716   | 318232.6 | 82280.99 | 67725.09 | 203967.3 | 2165346  | 835748.6 | 303599   | 71036.99 | 345288   |
| 1530702  | 1385289  | 66177.88 | 63886.32 | 378497.2 | 2656915  | 2407052  | 3416263  | 73674.86 | 704824.7 |
| 5214312  | 5027866  | 2252876  | 466265.3 | 5510852  | 2373354  | 8844291  | 12267859 | 0        | 7967015  |
| 289207.1 | 196752   | 26766.27 | 3138.29  | 71719.02 | 627234.6 | 351505.8 | 433310.5 | 17269.94 | 153744.5 |
| 393834.3 | 381695.6 | 17496.9  | 14179.39 | 51241.4  | 218559.4 | 1033267  | 624485.4 | 51352.19 | 217491.1 |
| 71130077 | 71417459 | 72497369 | 39899375 | 1.76E+08 | 25702751 | 1.48E+08 | 1.89E+08 | 502374.4 | 79910219 |
| 4808109  | 2163828  | 2270126  | 3633852  | 5080077  | 3072625  | 6887637  | 8037083  | 2121633  | 5378851  |
| 12016148 | 11188975 | 94708.09 | 0        | 411643.9 | 1719929  | 36391847 | 26058848 | 887720.9 | 4447585  |
| 6.58E+08 | 6.89E+08 | 17050481 | 15804000 | 2.9E+08  | 4.32E+08 | 1.52E+09 | 1.08E+09 | 2064827  | 1.38E+08 |
| 1756793  | 1444291  | 114016.4 | 108067.8 | 344472.2 | 1917007  | 3903687  | 3038488  | 416686.7 | 1358617  |
| 16792589 | 9979939  | 5610513  | 8645023  | 14244280 | 49252883 | 28921098 | 20767572 | 3116401  | 9678604  |
| 3523584  | 2178142  | 680226.2 | 356851.1 | 1654853  | 7453607  | 3492133  | 3489089  | 604266.7 | 2288424  |
| 939169.5 | 1136306  | 85834.95 | 15404.98 | 426834.9 | 1782814  | 902405.6 | 1042912  | 219060.6 | 118601   |
| 35436182 | 45370477 | 1583614  | 893751.3 | 2274894  | 23166392 | 85665444 | 1.12E+08 | 124002.8 | 38701359 |
| 438685.2 | 293619.2 | 11581.75 | 15445.29 | 69288.65 | 1433257  | 1645738  | 650816.1 | 118845.4 | 308728.2 |
| 1094709  | 819010.9 | 1791852  | 914858.6 | 2378471  | 1345999  | 290266.5 | 297050.2 | 903104.7 | 1926248  |
| 303521.8 | 273472.1 | 16918.02 | 16493.25 | 49015.51 | 90632.1  | 849203.3 | 629220   | 5305.436 | 95877.95 |
| 3203497  | 434263.7 | 2277471  | 2545819  | 3200140  | 4113212  | 2968769  | 3548153  | 2642339  | 3189582  |
| 655022.8 | 418722.1 | 48461.56 | 32914.14 | 143784.9 | 1543493  | 663831   | 989834.7 | 106988.9 | 343788.8 |
| 95853.32 | 67640.12 | 43592.64 | 72282.81 | 32760.11 | 168392.7 | 68064.46 | 206821   | 45869.73 | 43992.63 |

|          |          |          |          |          |          |          |          |          |          |
|----------|----------|----------|----------|----------|----------|----------|----------|----------|----------|
| 6188999  | 4132592  | 1569197  | 1576587  | 5281080  | 20600716 | 11976261 | 7686734  | 831005.3 | 3048903  |
| 212173.2 | 297126.2 | 195861   | 143657.4 | 849836.9 | 71201.28 | 269611.3 | 735169.4 | 15642.31 | 91220.51 |
| 525141.1 | 388521.9 | 130292.2 | 136049.2 | 226260   | 461018.8 | 1069222  | 754771.3 | 88761.97 | 324958.2 |
| 662803.1 | 368052   | 227930   | 337451.6 | 137469   | 1150199  | 840226.8 | 985149.3 | 207109.7 | 332416.5 |
| 208197   | 230616.4 | 152482.6 | 161663.7 | 117550.1 | 218535.3 | 785364.1 | 101059.6 | 36684.58 | 244022.2 |
| 693768.5 | 180876.7 | 202750.9 | 231161.7 | 250692.2 | 232262.5 | 1761089  | 812404.7 | 493255.1 | 534361.8 |
| 81794.22 | 26551.82 | 100368.1 | 57445.91 | 96761.91 | 93130.88 | 96015.32 | 123908.8 | 67968.59 | 54881.78 |
| 3818276  | 3146530  | 304467.4 | 164563.8 | 1033162  | 6556654  | 6151698  | 4939948  | 264144.9 | 2158786  |
| 613196.4 | 425802.2 | 50626.89 | 28187.85 | 81778.34 | 1205633  | 931712.7 | 702732.2 | 77539.19 | 271915.2 |
| 737236.6 | 547569.5 | 90915.69 | 59479.66 | 162957   | 1492990  | 963484   | 1226239  | 58363.83 | 332896.8 |
| 8713718  | 8148744  | 175413.5 | 52128.49 | 544094.7 | 11200251 | 18831721 | 14674884 | 1442632  | 5317391  |
| 1715101  | 1196249  | 176075.9 | 87495.11 | 366499.9 | 3550179  | 2271042  | 3408855  | 362924.2 | 798623   |
| 15572097 | 21453198 | 3944761  | 2017049  | 4012618  | 2712925  | 36714528 | 50982972 | 251766.6 | 20920689 |
| 500824.5 | 258498.6 | 56646.28 | 137185.5 | 131726.1 | 954705.8 | 700455.9 | 621576.6 | 355973.6 | 839210.5 |
| 7051039  | 5998113  | 3422811  | 1508564  | 6779902  | 9370675  | 27113086 | 16402202 | 402056.7 | 3783558  |
| 1021516  | 712622.6 | 234071.4 | 325140.1 | 732190.3 | 4454414  | 1448046  | 1059190  | 298439.4 | 500070.9 |
| 335644.6 | 190549.1 | 102177.6 | 112118.9 | 163937.2 | 879169.5 | 937774.2 | 502874.8 | 64942.24 | 224035.7 |
| 4547135  | 2626699  | 141300.4 | 316300.7 | 1280195  | 3354740  | 11650531 | 7323604  | 714180   | 3575773  |
| 792800.1 | 714734.2 | 0        | 0        | 11211.99 | 513407.2 | 2164526  | 1251620  | 6842.933 | 151875.8 |
| 5025725  | 6183292  | 27050.37 | 26848.84 | 871527.4 | 556532.5 | 14199583 | 14766310 | 143087   | 920139.1 |
| 226802.6 | 118794.7 | 35896.07 | 17445.69 | 110523.9 | 462149.9 | 267633.1 | 252461.6 | 31247.99 | 212792.5 |
| 1.67E+08 | 1.8E+08  | 7094381  | 4000990  | 18817691 | 4.71E+08 | 40885680 | 4.11E+08 | 993746.7 | 45077277 |
| 182961.2 | 173796.7 | 2774.34  | 2499.182 | 89422.74 | 562979.5 | 652727.1 | 429461.1 | 61874.59 | 80219.38 |
| 805672.8 | 684303.7 | 77975.53 | 5077.207 | 154313.6 | 249554.3 | 2265626  | 2003203  | 280087.5 | 577685.4 |
| 116795.8 | 82490.4  | 34435.11 | 31110.13 | 113858.6 | 333943.8 | 240199.5 | 175453.3 | 9237.416 | 57009.18 |
| 672995.2 | 524142.4 | 442090   | 553735.7 | 426931.4 | 342721.7 | 967040   | 1298265  | 1171587  | 406219   |
| 100372   | 140897.2 | 14154.59 | 0        | 151015.7 | 474323.8 | 118826.2 | 43277.5  | 10049.35 | 34135.25 |
| 176542.1 | 299118.6 | 188058.2 | 115810.1 | 326264.7 | 382450   | 219067.6 | 104676.9 | 9525.271 | 26885.78 |
| 2289791  | 1699460  | 232383.9 | 161976.8 | 1200853  | 8130584  | 6178993  | 4191289  | 171942.1 | 946261.2 |
| 5139246  | 6122873  | 390510.5 | 415600.3 | 8990586  | 1915021  | 6179160  | 15760783 | 5079.084 | 2607862  |
| 352929.3 | 327391.3 | 43949.02 | 87637.37 | 350707.3 | 1430057  | 556832   | 407561.3 | 16677.25 | 102649.4 |
| 1817354  | 1703738  | 611117.1 | 372388   | 1352066  | 515436.9 | 3840235  | 4531819  | 28970.62 | 834572.1 |
| 330525   | 369783   | 104542   | 165298.6 | 51563.46 | 289083.1 | 581914.5 | 984354.2 | 72859.33 | 195576.4 |
| 502012.8 | 158300.3 | 427348.3 | 442891.5 | 336475   | 589828   | 514199.3 | 699925.1 | 421164.8 | 466307.7 |
| 3396981  | 2439288  | 12581.91 | 6875.214 | 25961.33 | 3066905  | 8935803  | 4614540  | 620406.7 | 3877079  |
| 4946466  | 4297765  | 835795.9 | 163924.2 | 761813.5 | 13833305 | 1348465  | 6718810  | 50555.51 | 3295278  |
| 413339.5 | 448310.8 | 181779.4 | 196040.8 | 55863.13 | 290525.5 | 774447.5 | 1164630  | 96016.44 | 273221   |
| 82372.55 | 26937.94 | 62034.47 | 77068.06 | 85615.51 | 94271.72 | 133480.8 | 114544.7 | 55851.91 | 53302.39 |
| 940765.3 | 718474.6 | 231589.1 | 590786.5 | 371321.7 | 3448279  | 1715200  | 1253227  | 60445.64 | 349038.2 |
| 128990.6 | 80605.57 | 24300.83 | 15861.97 | 90027.55 | 217417.5 | 169430.6 | 197029.7 | 5613.242 | 101823.3 |
| 341736.6 | 308344.4 | 24425.25 | 29893.73 | 13246.32 | 481592.7 | 688138.5 | 544440.8 | 36678.04 | 235727.2 |
| 220199.8 | 275918.4 | 2886.374 | 6565.762 | 226511.3 | 35285.92 | 464997   | 259589.5 | 10916.88 | 70630.19 |
| 308776.4 | 187838.9 | 18269.39 | 21828    | 158552.5 | 1286847  | 693331.8 | 418030.6 | 103546.1 | 155874   |
| 919206.7 | 617212.7 | 597613.2 | 1548623  | 879800.6 | 2532129  | 216205   | 1171483  | 7381.747 | 581272.4 |
| 283587.8 | 198178.6 | 81365.95 | 70628.53 | 175265.1 | 233720.7 | 558076.8 | 441128.1 | 22622.45 | 127904.6 |
| 111608.4 | 88729.41 | 39884.15 | 39735.23 | 22258.8  | 55522.72 | 259065.6 | 197143.5 | 13663.87 | 51037.02 |
| 608988.1 | 265753.2 | 225246.7 | 108978.8 | 208314.9 | 3661182  | 545269.6 | 637363.1 | 189809.4 | 550488.1 |



|          |          |          |          |          |          |          |          |          |          |
|----------|----------|----------|----------|----------|----------|----------|----------|----------|----------|
| 186420   | 156481.3 | 9351.667 | 3223.935 | 90438.86 | 728232.9 | 493584   | 179185.4 | 0        | 67234.1  |
| 191953   | 126594   | 6912.537 | 2398.464 | 8788.165 | 620601.3 | 752930.4 | 215697.2 | 117687.9 | 339236.8 |
| 55726.78 | 51104.38 | 7294.652 | 8292.081 | 70018.97 | 170455.3 | 115326.6 | 138978.8 | 9671.664 | 18919.79 |
| 300696.2 | 176705.7 | 57833.06 | 44438.87 | 190511.1 | 254390.8 | 637704.8 | 337999.9 | 44384.41 | 217679.8 |
| 238274.9 | 258269.2 | 142611.3 | 139854   | 73464.63 | 180912.5 | 352457.2 | 622382.5 | 17410.68 | 83037.88 |
| 346523.3 | 364134.9 | 26737.2  | 19519.71 | 67500.78 | 641497.2 | 480246.4 | 176954.3 | 19820.38 | 200568.5 |
| 874097.7 | 131115.9 | 798440.3 | 849087.4 | 946256.2 | 599458.2 | 967811.3 | 1002730  | 760506.8 | 770366.7 |
| 4315187  | 7291001  | 306268.6 | 105468.8 | 1447009  | 8456739  | 2584370  | 2138400  | 71288.96 | 955008.4 |
| 2153835  | 1833011  | 394990.3 | 84558.28 | 597286.3 | 3422564  | 3594066  | 3940204  | 343086.1 | 226276.7 |
| 589975.8 | 287491   | 549497.7 | 723334.3 | 699278.2 | 713810.5 | 589199.9 | 497342.4 | 600507.2 | 190891.6 |
| 863064.2 | 652102.6 | 46275.52 | 0        | 48836.21 | 95554.13 | 2682377  | 1848078  | 217696.8 | 468358   |
| 483433.2 | 419873.2 | 786969.4 | 589019.1 | 582017.5 | 698500.9 | 260432.1 | 823042.8 | 29166.64 | 68269.44 |
| 240299.1 | 195496.5 | 22220.01 | 20957.6  | 10346.25 | 236622.7 | 578653.7 | 406570.5 | 41866.12 | 200556   |
| 298285.5 | 327911.2 | 325371.1 | 426185.7 | 83538.56 | 608705.8 | 454436.7 | 132778.3 | 181973.5 | 145381.4 |
| 1276889  | 1177890  | 307036.2 | 281676.1 | 159767   | 1183182  | 2751776  | 2130506  | 107629.8 | 845657.8 |
| 665583.2 | 451665.1 | 157324   | 135857.8 | 474951.9 | 2215729  | 1436599  | 847375.3 | 49077.41 | 355718.8 |
| 1574734  | 1165438  | 14070.8  | 2522.286 | 67611.82 | 2757954  | 2970087  | 2969004  | 148786.2 | 938703.7 |
| 1984452  | 1709859  | 391713.1 | 201884.3 | 863089.1 | 2356452  | 3707105  | 2177643  | 261170   | 807273.1 |
| 890154.7 | 1195638  | 2516.829 | 5408.235 | 113668.7 | 88194.29 | 2519783  | 2968258  | 544628.4 | 736500.3 |
| 637660.5 | 625304.6 | 254841.1 | 219797.3 | 570479.5 | 2263826  | 993128.6 | 811283.4 | 76306.81 | 270332   |
| 1057036  | 736163   | 85600.06 | 62587.53 | 306522.1 | 2120851  | 1452557  | 1458313  | 137739.4 | 559143.4 |
| 1041579  | 687708.7 | 152853.6 | 126804.5 | 474101.2 | 4839446  | 1908335  | 1345121  | 339792.2 | 340137.5 |
| 594390.8 | 808524.4 | 54263.15 | 6389.692 | 245646.6 | 1170570  | 495439.8 | 791725.8 | 65654.49 | 77884.46 |
| 342553.7 | 267502.2 | 32875.91 | 0        | 33840.15 | 0        | 1068388  | 816279.3 | 172137.6 | 204661.3 |
| 9441471  | 13163198 | 3493393  | 1457261  | 1960707  | 3986193  | 20008161 | 32567487 | 114181.1 | 6765834  |
| 176358.3 | 86747.6  | 26549.31 | 14630.13 | 62800.72 | 1053934  | 216353.3 | 258442.6 | 56295.52 | 158539.8 |
| 12266330 | 7662069  | 96478.44 | 46153.73 | 298947   | 26438884 | 18769364 | 17660040 | 1561859  | 8200603  |
| 580012.6 | 506925.8 | 44821.11 | 269700   | 246427.7 | 932068.6 | 741031.2 | 877552.3 | 64378.29 | 231631   |
| 147217.2 | 79221.66 | 69103.47 | 62968.98 | 45512.45 | 468548   | 310611.4 | 225201.7 | 55639.78 | 70426.17 |
| 298049.7 | 244806.2 | 46955.8  | 23385.44 | 115350.2 | 1330004  | 631492.9 | 411654.9 | 42093.8  | 106784.2 |
| 738241.7 | 550827.6 | 190062.8 | 253041.4 | 388158.5 | 1428064  | 644638.8 | 1503731  | 219290.5 | 206552.8 |
| 975265.3 | 1989865  | 0        | 3273.29  | 34914.81 | 3967137  | 3970874  | 4532648  | 22519.49 | 32451.53 |
| 716271.8 | 396208.9 | 624628.3 | 909599.2 | 885908.9 | 1013653  | 613669.5 | 610145.2 | 1293888  | 185930   |
| 329954.4 | 199285.8 | 7986.701 | 0        | 0        | 0        | 1081263  | 527016.8 | 12194.83 | 279748.1 |
| 7637261  | 11760982 | 9556.445 | 4268.121 | 0        | 4863594  | 18296835 | 27637622 | 22454.93 | 0        |
| 1383976  | 1002783  | 271525.2 | 378211   | 557214.6 | 3940348  | 4163982  | 44773.32 | 758144   | 1479802  |
| 465492.8 | 70292.24 | 418479.1 | 1108197  | 352117.6 | 426368.3 | 378862.7 | 447465.9 | 401816.9 | 438010.5 |
| 786187   | 516289.4 | 98322.79 | 57057.61 | 275634.4 | 1356618  | 1271218  | 787063.4 | 115989.9 | 540606.4 |
| 262021.1 | 153675   | 286561.1 | 359418.8 | 299783.5 | 358008   | 187013.3 | 339822.1 | 232075.9 | 193798.5 |
| 3175633  | 4112159  | 1194926  | 183233.9 | 748330.4 | 1520021  | 6992070  | 10305670 | 39772.53 | 2847104  |
| 60962148 | 73571557 | 530471.1 | 444602.3 | 26439812 | 6945782  | 1.64E+08 | 1.31E+08 | 0        | 5274099  |
| 239452.6 | 228538.1 | 5294.479 | 2935.794 | 11969.08 | 217897.5 | 597137.5 | 480975.6 | 28449.49 | 139520.9 |
| 1101522  | 884339.5 | 6785.855 | 2936.337 | 36301.93 | 1294165  | 2626251  | 1534001  | 159704.6 | 666949.1 |
| 1992143  | 1854411  | 19576.92 | 39019.89 | 1286557  | 2134888  | 3893923  | 3044753  | 372293.6 | 1277097  |
| 6570943  | 5035271  | 497345   | 288550.3 | 1901083  | 10768727 | 11461994 | 9128217  | 556533.6 | 4211362  |
| 54509844 | 67538860 | 375860.2 | 548681.8 | 24009642 | 4877497  | 1.46E+08 | 1.17E+08 | 172696.4 | 4936616  |
| 746476   | 350681.3 | 430277.4 | 456444.6 | 585899   | 1365557  | 1578680  | 551985.3 | 343877.7 | 688105.1 |

|          |          |          |          |          |          |          |          |          |          |
|----------|----------|----------|----------|----------|----------|----------|----------|----------|----------|
| 1013647  | 763747.1 | 141133.2 | 86698.01 | 361259.9 | 2538204  | 599574.9 | 2175591  | 138767.8 | 566582.7 |
| 225724.8 | 168044.7 | 317761.1 | 358812   | 339486.4 | 257010.1 | 71035.5  | 520832   | 160829.1 | 130585.3 |
| 4249418  | 3422173  | 459343.1 | 527210.5 | 2641075  | 8501652  | 4134534  | 8940568  | 543753.4 | 1545196  |
| 274148.7 | 174635.9 | 132377.2 | 109289.1 | 78013.04 | 690697.2 | 767507.6 | 292808.1 | 63430.96 | 158510.2 |
| 268175.7 | 264991   | 2519.854 | 0        | 0        | 0        | 851907.7 | 671475.6 | 4732.835 | 73953.97 |
| 1.19E+08 | 1.28E+08 | 34110258 | 60146.98 | 66676216 | 92500592 | 2.36E+08 | 2.98E+08 | 30321563 | 57209384 |
| 296611   | 102261.9 | 155583.4 | 217512.6 | 188265.5 | 313961.5 | 445337.8 | 447387.9 | 271322.5 | 236113.4 |
| 217853.4 | 149073.5 | 56531.87 | 148421.3 | 159836.8 | 544960.3 | 451612.4 | 235629   | 22427.7  | 125187.3 |
| 15234407 | 10394319 | 1854567  | 1679390  | 5587581  | 27894559 | 22310918 | 20007299 | 1201558  | 7284774  |
| 271285.2 | 145096   | 214629.9 | 248139.6 | 37531.64 | 399421.6 | 795147   | 424609.2 | 169725.5 | 76439.41 |
| 183751.8 | 125038.7 | 244177.2 | 94359.44 | 379970.3 | 164021.5 | 207466.4 | 344493.8 | 7249.894 | 171945.7 |
| 5854849  | 3999072  | 499894.5 | 335958.9 | 1383071  | 12048892 | 8062090  | 8435185  | 939622.9 | 2294303  |
| 2890733  | 3249148  | 352288.7 | 127820.4 | 415533.2 | 470267.2 | 8124565  | 8543254  | 777890   | 1168756  |
| 143875.8 | 167918.9 | 50900.16 | 56604.53 | 29763.5  | 124104.3 | 256242.9 | 122406.3 | 9977.4   | 84641.69 |
| 399796.2 | 333637.2 | 19306.13 | 20359.86 | 77882.91 | 110228.8 | 1150409  | 946084.8 | 166840.9 | 448244   |
| 95929.95 | 82890.34 | 36796.29 | 47370.19 | 50600.13 | 363602.5 | 150655.6 | 152255.5 | 15177.95 | 11476    |
| 138154.1 | 106485.8 | 2214.243 | 2264.808 | 2277.055 | 227278.6 | 275452.3 | 260323.9 | 3804.079 | 99652.07 |
| 7304472  | 7502053  | 421549.1 | 201566.2 | 209552.6 | 912148.8 | 22030746 | 6145743  | 717535.5 | 18119554 |
| 774122.9 | 584858.4 | 520867.4 | 562487.4 | 487876   | 2215648  | 1060891  | 1629468  | 193532.8 | 269188.8 |
| 2594280  | 1817414  | 684002.2 | 229372   | 1749130  | 2979732  | 4673375  | 2610637  | 272719.9 | 1444778  |
| 379630.2 | 233972.2 | 182656.2 | 156932.7 | 288593.7 | 473671.6 | 500777.9 | 260687   | 73883.73 | 339285.1 |
| 88215.92 | 71362.32 | 19649.53 | 58988.52 | 62054.61 | 288154.9 | 146527.6 | 107046.9 | 15642.92 | 22058.7  |
| 230490.3 | 226626   | 11090.21 | 9266.418 | 12942.43 | 174392.6 | 593623.1 | 438626   | 37034.98 | 141253.9 |
| 822401.6 | 1124248  | 418390.1 | 222055   | 858992.5 | 565995.5 | 815017.1 | 459856.4 | 432977   | 126635.8 |
| 276320.7 | 503113.3 | 10117.43 | 6522.406 | 10535.48 | 21640.63 | 714975.2 | 1172124  | 55711.84 | 14282.26 |
| 743879.9 | 505872.5 | 305341.8 | 346162.8 | 384004.2 | 833241.2 | 1190397  | 1284014  | 85407.43 | 471153.8 |
| 99378.57 | 88270.77 | 43466.03 | 104922.7 | 109711.6 | 202068.9 | 146633.1 | 140493.3 | 17999.63 | 17066.5  |
| 79119.66 | 150157.5 | 61285.97 | 35063.36 | 0        | 54095.63 | 81766.89 | 347307   | 3774.406 | 11985.33 |
| 241327.4 | 163962.2 | 84737.07 | 117199.7 | 102735.2 | 1241796  | 216493.8 | 504230.6 | 97284.02 | 110702   |
| 75907343 | 58789758 | 54245108 | 29789179 | 1.28E+08 | 31365528 | 2.51E+08 | 1.77E+08 | 27728874 | 71874717 |
| 4401427  | 3322439  | 73333.96 | 40909.54 | 301304.4 | 8033858  | 7941661  | 9068808  | 454095.4 | 2604423  |
| 93801.85 | 66278.93 | 12137.59 | 2863.203 | 38973.76 | 132593.3 | 177061.3 | 118359.8 | 21251.88 | 44849.81 |
| 42663661 | 40414290 | 24244547 | 15829167 | 61159078 | 12509734 | 51640421 | 1.06E+08 | 415908.4 | 56296792 |
| 25804500 | 16906694 | 3630639  | 1540816  | 7172367  | 44254359 | 43807138 | 31436911 | 3624329  | 14519457 |
| 823174.5 | 720153.9 | 32149.84 | 23743.93 | 95748.64 | 1136958  | 1729356  | 1239034  | 133202.1 | 481015.1 |
| 5641598  | 3787397  | 453181.1 | 321974.1 | 1364390  | 10970349 | 8580466  | 7787893  | 835806.7 | 2567247  |
| 959487.2 | 912521.2 | 27221.41 | 5353.698 | 43942.13 | 1477804  | 1907098  | 1446242  | 204943.1 | 655529.2 |
| 496015.2 | 302925.3 | 141531.5 | 45383.94 | 265203.9 | 667633   | 878323.7 | 541242.8 | 89092.21 | 353146.5 |
| 2258501  | 1370087  | 526410.6 | 260477.8 | 1821311  | 8753881  | 3865820  | 3828969  | 324244.5 | 1521303  |
| 1942664  | 1891316  | 566370.2 | 74652.67 | 1718715  | 507170   | 4240570  | 5102146  | 218729.3 | 1916671  |
| 153176.8 | 148036.3 | 9103.469 | 3330.301 | 48233.8  | 52469.39 | 417023.1 | 184447.3 | 15870.62 | 101956.5 |
| 121590   | 87021.06 | 8939.856 | 7147.923 | 26010.17 | 212815   | 210180   | 86022.34 | 19475.94 | 83656.77 |
| 243931.3 | 253877.2 | 22290.61 | 18550.06 | 203497.4 | 841290.9 | 593636.4 | 351412   | 15544.23 | 84346.1  |
| 207463.9 | 136087.3 | 6517.765 | 3024.261 | 58827.4  | 372035.5 | 357500.8 | 246981.7 | 13236.35 | 127465.5 |
| 468982.9 | 295486.2 | 102416.5 | 68926.77 | 245354.1 | 852041.8 | 612636.3 | 458528.5 | 60448.09 | 321736.2 |
| 1048703  | 968204.3 | 0        | 4040.316 | 29013.88 | 75256.71 | 3320422  | 1892669  | 84746.65 | 1214643  |
| 308395.2 | 163997.4 | 19567.14 | 8557.809 | 69256.86 | 456403.9 | 642851.5 | 419948.8 | 162053.8 | 112842.3 |

|          |          |          |          |          |          |          |          |          |          |
|----------|----------|----------|----------|----------|----------|----------|----------|----------|----------|
| 526548.8 | 454614.2 | 48052.36 | 37066.31 | 59296.68 | 1042773  | 770489.7 | 543428.8 | 55377.68 | 216380.1 |
| 1131001  | 817620.3 | 104289.9 | 75203.6  | 497377.5 | 4156539  | 2951159  | 1803874  | 38102.37 | 578182.9 |
| 245804.4 | 206485.4 | 48366.2  | 23479.68 | 55063.76 | 436490.8 | 372228.8 | 277096.7 | 43951.29 | 64214.94 |
| 350649.2 | 427389.4 | 15463.23 | 10753.85 | 227552.3 | 237085.4 | 730948.1 | 367963.7 | 9738.203 | 127621.7 |
| 457058.8 | 295567.9 | 94079.71 | 57130.94 | 253485.9 | 1550361  | 1094030  | 505862   | 62766.11 | 286605   |
| 2242329  | 1137575  | 716180.8 | 637843.7 | 1453864  | 5884264  | 5485430  | 3434858  | 579913.5 | 1690029  |
| 8216040  | 13412146 | 0        | 10317.06 | 0        | 5061708  | 19707398 | 31691562 | 11590.8  | 0        |
| 245266.5 | 219059.7 | 5124.397 | 4135.136 | 0        | 331467.3 | 546439.4 | 374335.9 | 25850.63 | 171662.6 |
| 913994.8 | 888042.9 | 4056.34  | 0        | 12128.43 | 56284.78 | 2897069  | 2136486  | 134628.1 | 1380013  |
| 55965176 | 96972984 | 39570.92 | 13557569 | 83036540 | 3.75E+08 | 504044.4 | 2.24E+08 | 54442448 | 166863.7 |
| 81463.86 | 50874.41 | 28692.32 | 40594.86 | 68537.49 | 154980.2 | 210546.3 | 127053.6 | 12451.74 | 57227.86 |
| 8747906  | 7740563  | 2061393  | 607329.2 | 4746813  | 14641396 | 11630615 | 15370164 | 697316.4 | 2079016  |
| 1009587  | 671641.2 | 73099.47 | 17490.45 | 345215.9 | 2358104  | 1042529  | 1333977  | 55092.92 | 589713.6 |
| 338776.2 | 280567.5 | 45610.29 | 295238.9 | 199722.8 | 1161399  | 522140.6 | 782960.6 | 225038.7 | 122748.2 |
| 756585.5 | 968429.1 | 937359.5 | 544969.5 | 1876698  | 729220.4 | 824051.6 | 2444347  | 4155.29  | 272194.5 |
| 452954.1 | 306306.3 | 0        | 0        | 11624.78 | 488200.2 | 1158195  | 787715.7 | 42928.44 | 495049.7 |
| 84537.05 | 65339.75 | 10181.16 | 0        | 16652.08 | 66610.34 | 216148.3 | 83582.38 | 0        | 54213.74 |
| 136717.8 | 103944.6 | 23610.25 | 9706.552 | 57252.49 | 221892   | 220695.5 | 271505.5 | 5199.285 | 64412.76 |
| 143591.1 | 88633.39 | 16512.42 | 15846.09 | 22237.25 | 262884.2 | 241736.7 | 190772.1 | 20723.14 | 79160.53 |
| 367624   | 323895.1 | 60659.07 | 119753.3 | 351876.1 | 1433297  | 528260.4 | 416263.2 | 15452.67 | 140528.2 |
| 270514.9 | 257643   | 362135.9 | 66604.84 | 316386.4 | 867615.6 | 149582.9 | 103856   | 135905.7 | 154579.5 |
| 6668258  | 4781954  | 855975.3 | 621607.4 | 2563476  | 9659922  | 12328941 | 9646245  | 309116.6 | 2951027  |
| 211337.9 | 158522.4 | 0        | 7326.994 | 7176.95  | 1018839  | 521331.8 | 370841.6 | 0        | 123475.2 |
| 50547662 | 63030546 | 50041.91 | 385107.8 | 22867584 | 3553699  | 1.38E+08 | 1.08E+08 | 381900.1 | 4843147  |
| 907608.4 | 1304672  | 185098.7 | 171034.3 | 155972.1 | 94773.89 | 2290945  | 3180982  | 60845.9  | 324957.1 |
| 1074858  | 671433.1 | 74201.12 | 664459   | 250615.6 | 1718475  | 1635581  | 941352.7 | 177645.8 | 906815.7 |
| 512377.3 | 887248   | 159778   | 14132.81 | 176493.1 | 370565.5 | 865100.1 | 2077984  | 8338.741 | 8294.047 |
| 685527.6 | 534868.1 | 16616.37 | 5599.492 | 53978.5  | 203638.4 | 2080567  | 1490447  | 169809.4 | 515403.4 |
| 247883.4 | 163289.4 | 85247.43 | 63156.65 | 118189.9 | 651638   | 686929.7 | 426283.9 | 38964.76 | 157305.5 |
| 415709.9 | 357590.3 | 200884.3 | 233170.1 | 395829.7 | 368395.5 | 490893.9 | 972615.7 | 174472.2 | 140702.3 |
| 947707.6 | 755439.2 | 21131.26 | 4678.353 | 14661.56 | 1319859  | 2128558  | 1433466  | 315091.8 | 966402   |
| 201185.1 | 181036.5 | 44589.26 | 18799.62 | 81863.7  | 244127.2 | 377510.3 | 286645   | 16831.65 | 98051.16 |
| 8761110  | 8291985  | 6587835  | 1247048  | 19285687 | 591424   | 4779706  | 20336699 | 0        | 14231141 |
| 533386.6 | 434277.9 | 88019.67 | 79194.72 | 262386.7 | 134489.6 | 1386287  | 1245772  | 171905.9 | 470931.7 |
| 116255.2 | 120400.1 | 0        | 18915.59 | 48229.13 | 236083.6 | 122534.4 | 321099.1 | 17464.34 | 39961    |
| 443258.7 | 541826.1 | 2106.472 | 0        | 127957.9 | 155177.3 | 1186453  | 189579.8 | 0        | 0        |
| 666390.4 | 474351.8 | 102988.4 | 146299.2 | 263329   | 1544097  | 506509.3 | 1012673  | 91762.76 | 356380.6 |
| 2186157  | 2948717  | 209938.6 | 139381.6 | 106136.2 | 242696.4 | 6210670  | 7385421  | 829142.7 | 1337541  |
| 215533.1 | 202628   | 0        | 0        | 5715.059 | 286722.3 | 483780.7 | 299088.5 | 0        | 8004.754 |
| 2312222  | 1956623  | 73243.3  | 28181.99 | 468670.7 | 5283738  | 11029211 | 3807035  | 503688.2 | 1077714  |
| 1967645  | 1403648  | 231175.7 | 536356.1 | 736706.5 | 2690591  | 3588625  | 2717920  | 151475.4 | 1144700  |
| 94657.62 | 97182.9  | 38952.62 | 74406    | 43728.82 | 215977.3 | 237933.9 | 225340.6 | 20521.34 | 0        |
| 9059003  | 6267864  | 1671217  | 1194454  | 5346257  | 34398596 | 18566306 | 6553575  | 1768687  | 5992348  |
| 816622.4 | 587492.9 | 52880.36 | 30508.37 | 187935.7 | 1673830  | 1176959  | 1202642  | 107569.5 | 262148.5 |
| 317461.5 | 207403.2 | 2841.609 | 0        | 7944.615 | 108178.7 | 983651.6 | 293110.9 | 289861   | 559853.2 |
| 16664435 | 10861181 | 1783566  | 1125849  | 5893239  | 30823681 | 25788667 | 29548870 | 2565062  | 8790448  |
| 911542.8 | 651231.5 | 194974.6 | 236647   | 513932.2 | 544795.7 | 2056172  | 1430638  | 188939.7 | 501405.8 |

|          |          |          |          |          |          |          |          |          |          |
|----------|----------|----------|----------|----------|----------|----------|----------|----------|----------|
| 41834993 | 29924860 | 4577410  | 2708155  | 15385291 | 82368894 | 57471383 | 80917585 | 5029192  | 23360606 |
| 17629897 | 17235079 | 502636.6 | 282757.9 | 12785257 | 4421337  | 44685749 | 11104798 | 956623.1 | 4729003  |
| 232204.1 | 95705.27 | 157479.8 | 178069.9 | 171346.7 | 381749.9 | 133181.2 | 352164.3 | 121549   | 304279.4 |
| 163374.9 | 144487.2 | 34882.89 | 16828.58 | 144133.6 | 140206.8 | 876395   | 411064.7 | 37721.64 | 129453.9 |
| 374486.2 | 265939.7 | 65720.21 | 58345.98 | 260101.2 | 1313359  | 790867.1 | 683091.6 | 40411.87 | 158267.3 |
| 561881.5 | 346299.1 | 80196.96 | 64048.91 | 87967.29 | 612042.2 | 1314210  | 863959.1 | 122774.8 | 587872.4 |
| 1084279  | 938306.5 | 3049.983 | 3293.312 | 235922.7 | 989519.6 | 2704919  | 1715678  | 166710.9 | 1252286  |
| 388284.6 | 101707.4 | 339021.5 | 384064.9 | 412659.4 | 219637.1 | 450661.4 | 556408.3 | 363866   | 284455.4 |
| 233101.6 | 249608.6 | 425893.7 | 435019.6 | 312863.1 | 166549.1 | 117169.4 | 28480.68 | 562569.6 | 440670   |
| 723264.2 | 650015   | 17950.01 | 6755.888 | 124487.4 | 1588356  | 3610184  | 1264300  | 137678.2 | 339346.3 |
| 281637.3 | 183828.4 | 14399.19 | 16527.59 | 52340.33 | 86829.38 | 833569.5 | 425561.7 | 134349.4 | 59850.23 |
| 2042345  | 1409570  | 85720.54 | 79727.25 | 581161.4 | 7172953  | 6178040  | 3020477  | 299498.9 | 1277535  |
| 1513692  | 1682784  | 1593216  | 1989134  | 2704509  | 1032338  | 2078150  | 2121971  | 4191368  | 130200.4 |
| 1363931  | 1020534  | 743593   | 494454.4 | 898350.2 | 103057.6 | 3045306  | 2900420  | 141970.2 | 877743.5 |
| 357298.5 | 261716.9 | 33030.15 | 21648.19 | 100989.4 | 543076.1 | 681401.5 | 582429.7 | 18503.95 | 199162.7 |
| 2124680  | 4122361  | 6068.643 | 0        | 84890.02 | 7867570  | 8787147  | 9489728  | 86439.85 | 71267.71 |
| 109030   | 110823.6 | 29185.25 | 10348.7  | 53926.94 | 150328.8 | 168802.2 | 175741.8 | 16611.31 | 19056.25 |
| 412059.7 | 213686.3 | 134586.4 | 178775.8 | 252283.6 | 626687   | 558798.5 | 639394.5 | 89289.42 | 323677.1 |
| 68466.89 | 47860.43 | 15527    | 13909.18 | 48102.29 | 44549.03 | 147946.7 | 96870.32 | 0        | 36327.28 |
| 139084.5 | 71893.54 | 59240.71 | 56579.82 | 99526.72 | 134032.8 | 242096.2 | 143201.9 | 38786.13 | 108031.2 |
| 449845.7 | 286307.1 | 188473.6 | 220793.4 | 296718.8 | 719036.7 | 466126   | 939350.3 | 215062.6 | 334226.8 |
| 56203.16 | 45796.88 | 44368.32 | 55865.66 | 56940.32 | 64885.63 | 7632.481 | 89874.9  | 33779.16 | 9961.5   |
| 1.35E+09 | 1.16E+09 | 6.55E+08 | 2.85E+08 | 1.46E+09 | 1.9E+09  | 4.48E+09 | 3.1E+09  | 2759370  | 7.59E+08 |
| 489911.8 | 329221.6 | 123648.8 | 132478.1 | 225359.4 | 389906.3 | 1068182  | 667956.9 | 106311.9 | 217723.5 |
| 4418707  | 3181141  | 10281.44 | 28726.53 | 116311.2 | 8501780  | 24881823 | 6186518  | 1649033  | 4878031  |
| 26165925 | 17668177 | 2417872  | 1638340  | 7164180  | 57546402 | 32193614 | 33513141 | 3993143  | 11886821 |
| 2258966  | 2670153  | 7541.406 | 142948.7 | 3897151  | 771182.7 | 3259219  | 4756109  | 69211.78 | 575562.6 |
| 144914.5 | 105244.7 | 56486.97 | 39829.73 | 106115.9 | 694549.3 | 126038.8 | 148804.4 | 0        | 89993.74 |
| 1394950  | 960977.8 | 401420.2 | 318412.3 | 1092521  | 3770547  | 3287372  | 1743301  | 118728.3 | 654921.7 |
| 2114324  | 2385818  | 17931.67 | 18739.21 | 76311.64 | 798641.1 | 6127113  | 5432007  | 23740.05 | 779962.9 |
| 147168.2 | 66544.09 | 119443.1 | 124390.8 | 523538.5 | 69216.33 | 101845.8 | 137488.5 | 110416.8 | 150717.1 |
| 652767.5 | 507467.7 | 310393.1 | 341665.2 | 284363.9 | 654030.1 | 1068746  | 683228.1 | 216046.7 | 619060   |
| 92298.24 | 59598.99 | 30948    | 68579.62 | 53241.54 | 102538.3 | 350573.7 | 157031.3 | 27949.09 | 42704.61 |
| 393945.1 | 254269.4 | 51518.63 | 48118.02 | 130563.5 | 675303.7 | 656121.5 | 461439.9 | 66843.84 | 194237.5 |
| 3457972  | 4005855  | 452250   | 562351.5 | 9353961  | 2990524  | 10035460 | 10394036 | 166306   | 1925168  |
| 276096.7 | 157720.9 | 24590.88 | 21042.21 | 26307.09 | 361159.1 | 630730   | 162407.6 | 502235.9 | 117388.7 |
| 746702.6 | 407076.7 | 54165.71 | 311032.3 | 446220.9 | 2073921  | 1886849  | 1065456  | 252519   | 404250.2 |
| 222481.6 | 179897.4 | 35928.91 | 13660.4  | 218747.1 | 174019.1 | 427780.9 | 186169.7 | 22399.21 | 87213.29 |
| 201839.5 | 81669.08 | 183964   | 232128.5 | 194989   | 190715   | 115444.2 | 180557.1 | 175165.3 | 89464.51 |
| 263753.6 | 270111.4 | 163296.3 | 197101.1 | 220158.3 | 335848.6 | 116414.4 | 730215.9 | 139368.4 | 35165.08 |
| 497534.4 | 486108.1 | 55599.19 | 21108.6  | 235832.4 | 353501.8 | 1159715  | 679358.1 | 47907.12 | 77823.17 |
| 664920.4 | 421309.1 | 356722.7 | 499856   | 761467.2 | 736167.9 | 514304.5 | 630308.1 | 569792.5 | 157116.3 |
| 6459500  | 5940579  | 1383685  | 718394   | 22558613 | 3325259  | 15702969 | 15357063 | 21312.08 | 9006088  |
| 195331.1 | 140816   | 7148.54  | 8010.375 | 29537.7  | 388139.5 | 313816.1 | 309488.2 | 8453.788 | 96797.4  |
| 125750.6 | 43469.72 | 0        | 0        | 22391.67 | 623028.5 | 261531.1 | 170281.9 | 66595.09 | 108918.4 |
| 173378.1 | 96862.03 | 3027.929 | 0        | 25980.81 | 0        | 568157.3 | 270821.6 | 26562.3  | 174400.4 |
| 1191698  | 817827.8 | 247805.7 | 528578.1 | 549652.4 | 1958974  | 1584097  | 1068027  | 266462.5 | 923819.6 |

|          |          |          |          |          |          |          |          |          |          |
|----------|----------|----------|----------|----------|----------|----------|----------|----------|----------|
| 1451378  | 1097488  | 6008.954 | 2768.316 | 80727.68 | 1600872  | 3658628  | 1763625  | 731894.5 | 1587228  |
| 425661.9 | 368099.7 | 0        | 6838.977 | 19934.63 | 127623.4 | 1306468  | 855322.3 | 3333.509 | 115622.6 |
| 5048141  | 3408699  | 426735.3 | 315903   | 1320006  | 9765370  | 7862585  | 7104222  | 695886.4 | 2587345  |
| 645560.4 | 388359   | 63400.06 | 40325.2  | 177059.2 | 1307323  | 950719.7 | 994132.8 | 148886.2 | 358641.9 |
| 195161.1 | 152281.7 | 103514.6 | 100154   | 137802.9 | 954807.7 | 87147.42 | 107998.9 | 69764.52 | 199266.6 |
| 7007903  | 5493263  | 594088   | 562324.4 | 2246371  | 14339900 | 9237147  | 8269562  | 337717.9 | 2327831  |
| 1177993  | 813824.9 | 178111   | 39345.14 | 381983.5 | 1601521  | 2401973  | 1324814  | 213316.8 | 540132.3 |
| 10484476 | 8413091  | 277167.5 | 117823.6 | 1888328  | 12718759 | 24230142 | 20374009 | 2473311  | 8517606  |
| 89180.33 | 51434.87 | 36166.54 | 33369.35 | 46039.83 | 94462.79 | 162397.7 | 86569.37 | 18383.67 | 63570.31 |
| 11762357 | 7890064  | 1498469  | 1240221  | 3316295  | 19355199 | 20964338 | 11966383 | 1466423  | 6871409  |
| 81778.88 | 71805.29 | 0        | 4792.557 | 2611.658 | 438502.4 | 165588.3 | 151613.5 | 0        | 31805.28 |
| 400503.5 | 286519.6 | 31473.18 | 38424.42 | 195407.8 | 696885   | 620989.6 | 505597.4 | 22534.84 | 179693.6 |
| 5102425  | 5737954  | 1156028  | 1581907  | 1732037  | 4867664  | 9547816  | 15249405 | 1414983  | 2122068  |
| 890352   | 625166   | 178687.9 | 102821.3 | 561383.6 | 1323430  | 1424090  | 785922.6 | 84027.66 | 549499.1 |
| 198190.4 | 202967.1 | 83585.11 | 79466.08 | 179810.5 | 558573.6 | 372257.5 | 95132.08 | 5095.274 | 55200.31 |
| 1466825  | 984684.4 | 2663.464 | 3450.013 | 21473.6  | 259121.8 | 4755579  | 2402204  | 142338.1 | 745920.2 |
| 4356511  | 2461766  | 19315.25 | 15266.63 | 186548.2 | 8664386  | 7853124  | 6243592  | 784910.4 | 2761715  |
| 97629768 | 2.16E+08 | 73641595 | 38435412 | 1.49E+08 | 1101932  | 645649.1 | 1721652  | 203634.4 | 510878.5 |
| 1202929  | 731500.8 | 124210.9 | 60717.6  | 307490.7 | 2025670  | 2220910  | 1152193  | 218501.2 | 821486.9 |
| 133207.7 | 106775.4 | 20899.09 | 8044.552 | 70187.04 | 476968.7 | 321596.5 | 258348.9 | 9605.464 | 67948.22 |
| 358882.4 | 323979.6 | 2122.165 | 2623.851 | 60318.88 | 91806.69 | 1081589  | 647432.7 | 26142.55 | 343312.7 |
| 177538.3 | 47743.64 | 134436.9 | 221919.7 | 105173.9 | 141716.8 | 215733.3 | 228235.7 | 163961.4 | 134555   |
| 103099.9 | 66687.59 | 24659.56 | 44143.71 | 54463.49 | 48350.79 | 236966.2 | 144757.2 | 16537.84 | 116442.1 |
| 116134.1 | 93692.56 | 2747.955 | 0        | 14999.62 | 16326.54 | 365543.3 | 105618.6 | 0        | 70526.18 |
| 1420327  | 390662.3 | 1057366  | 1384122  | 1980455  | 1162893  | 972411.3 | 1178040  | 2036951  | 1101222  |
| 4241206  | 4482420  | 1525135  | 1137630  | 19066978 | 6324430  | 1780271  | 3891334  | 0        | 3167565  |
| 630528.7 | 235420.7 | 424500.7 | 381238.5 | 466203.4 | 448673.4 | 1071697  | 672101.7 | 495941.5 | 798348.4 |
| 1169147  | 1461704  | 21571.21 | 0        | 10538.44 | 969530.8 | 2965752  | 2041322  | 11395.99 | 201351.9 |
| 913459.8 | 687460.4 | 41493.03 | 97369.57 | 488894.8 | 3943462  | 1751755  | 1533650  | 47009.74 | 341931.5 |
| 13841049 | 23416511 | 1078679  | 35296.74 | 787235   | 35479967 | 4718335  | 2077159  | 2752383  | 5723491  |
| 2373809  | 3852390  | 1130660  | 962956.2 | 1231112  | 1638123  | 2989078  | 1904715  | 842923.5 | 0        |
| 23080472 | 11974186 | 3632796  | 1603964  | 4037776  | 49803217 | 32179329 | 39433407 | 9040220  | 16417728 |
| 481852   | 388764   | 68164.68 | 362489.8 | 249024.6 | 1184539  | 1184503  | 248874.7 | 73050.39 | 292887.4 |
| 856475.3 | 868271.4 | 176360.1 | 52083.64 | 460906.9 | 1458703  | 1108756  | 1547087  | 16923.07 | 175398.1 |
| 563193.5 | 460606.3 | 174851.4 | 791872.5 | 315677.5 | 1585532  | 641313.4 | 1180650  | 27487.28 | 204059.8 |
| 2348468  | 1346718  | 1133768  | 1000992  | 1671453  | 11270286 | 1285132  | 2538124  | 110591.6 | 2295397  |
| 108237   | 81908.18 | 36025.91 | 8471.756 | 26321.32 | 241949.5 | 422678.4 | 218620.2 | 18345.19 | 39442.27 |
| 256579.5 | 96221.19 | 199653.6 | 258224.7 | 243329.3 | 329399.3 | 365651.1 | 328449.2 | 169176.2 | 152859.4 |
| 196111.8 | 134096.2 | 72266.31 | 56052.46 | 75701.71 | 589908.5 | 467782.3 | 225535.3 | 45343.73 | 66446.01 |
| 85229746 | 73418620 | 9065102  | 165544.6 | 278638.2 | 698543.6 | 2.77E+08 | 475832.6 | 29785208 | 76587006 |
| 16357845 | 11929680 | 2364589  | 544843.2 | 10790888 | 62509176 | 33681601 | 36774499 | 5352892  | 12232554 |
| 248791.8 | 209868.5 | 37263.05 | 34486.63 | 101696.3 | 91787.06 | 653918.2 | 34591.18 | 66372.82 | 292453.9 |
| 117127.2 | 71000.49 | 26120.64 | 11627.42 | 89563.62 | 317787.3 | 301699.8 | 131961.5 | 11868.23 | 83337.84 |
| 733340.7 | 501569.4 | 55751.12 | 28795.49 | 172396.2 | 1551096  | 1038021  | 680267.9 | 147521   | 489715.3 |
| 553593.5 | 87801.44 | 379239.1 | 287753.3 | 566457.4 | 677724.5 | 666648   | 613606.6 | 481421.5 | 557373.2 |
| 466256   | 77771    | 367895.3 | 457036.5 | 520461.9 | 591416.9 | 503311.3 | 470153.6 | 387811.5 | 422031.8 |
| 230373.6 | 95665.17 | 2952.062 | 0        | 55628.61 | 609385.3 | 215184.8 | 371331.6 | 150324.1 | 142834.2 |

|          |          |          |          |          |          |          |          |          |          |
|----------|----------|----------|----------|----------|----------|----------|----------|----------|----------|
| 4558670  | 3103542  | 1204877  | 1353143  | 4189994  | 12561326 | 9176260  | 5853576  | 503153.1 | 2097758  |
| 158139.6 | 127009.5 | 19581.41 | 38186.5  | 64675.83 | 578417.2 | 359738.3 | 150793.3 | 8810.65  | 60532.76 |
| 1061284  | 605447.2 | 364044.6 | 138430.6 | 607324.6 | 1242931  | 2019764  | 1058231  | 213829.8 | 777556   |
| 439886.1 | 329581.7 | 456366.4 | 520046.2 | 78470.49 | 899949.3 | 673453.3 | 375317.5 | 32779.87 | 254133.1 |
| 3633643  | 2554230  | 708594.6 | 346998.3 | 1164283  | 4354850  | 7707682  | 5062459  | 637271.8 | 2248923  |
| 1326738  | 1775193  | 101807.2 | 73090.8  | 79917.97 | 220766.3 | 3829998  | 4443179  | 425506.7 | 888265.1 |
| 727319.4 | 394054.2 | 136947.8 | 198257   | 824459.1 | 1952704  | 1368204  | 1056047  | 144538.4 | 497051.6 |
| 884307.7 | 1308539  | 72628.17 | 2831031  | 2073805  | 1034832  | 118261.3 | 95023.29 | 71530.25 | 3137439  |
| 227624   | 64787.25 | 196605.7 | 272999   | 242611   | 146183.4 | 202123.5 | 266389.9 | 153454.5 | 165716.5 |
| 28608196 | 18743938 | 3125517  | 2106887  | 9018602  | 54344763 | 44555726 | 50824065 | 4505511  | 16253743 |
| 8444482  | 11832086 | 4025724  | 3577103  | 5760344  | 394375.8 | 52755005 | 4844192  | 0        | 2499633  |
| 253764.1 | 204535.5 | 96603.77 | 62793.51 | 130374.4 | 998171.4 | 409945.3 | 417832.9 | 31422.64 | 95596.86 |
| 256752.6 | 281499.2 | 2912.832 | 2395.372 | 57910.41 | 488584   | 1360094  | 160911.8 | 11522.2  | 475434.3 |
| 2666959  | 1546402  | 3217.655 | 5364.039 | 81710.84 | 5262205  | 4915455  | 3670741  | 433471.7 | 1647546  |
| 927132.5 | 1420358  | 146773.9 | 4420896  | 1521789  | 454970.9 | 281470.3 | 80136.58 | 253651.8 | 3455022  |
| 787758.6 | 552136.3 | 121717.7 | 23146.59 | 113927.4 | 119518.1 | 2420888  | 1439352  | 261650.7 | 433326.7 |
| 482451.7 | 474334.3 | 11605.08 | 12317.49 | 21384.88 | 1062372  | 656712.3 | 484625.6 | 5145.844 | 54843.46 |
| 14489006 | 23432168 | 152191.4 | 40903.41 | 1051586  | 1834563  | 41071622 | 55946026 | 0        | 4879869  |
| 781363.6 | 545906.8 | 160728.5 | 168064.7 | 348258.7 | 2911982  | 1603292  | 832910.3 | 71678.68 | 421219.3 |
| 448911.9 | 285142.5 | 63491.43 | 12479.38 | 144087.1 | 804144.6 | 757448.6 | 478711.3 | 54363.83 | 302385   |
| 508765.4 | 299047.2 | 44987.75 | 808281.7 | 116440.5 | 1139836  | 1002155  | 716909.7 | 66792.71 | 330533.8 |
| 153693.8 | 146012   | 85011.67 | 365042.8 | 265608.2 | 105978.8 | 127544.4 | 86342.86 | 69939.8  | 413496.6 |
| 4337150  | 5974821  | 3597.131 | 4662.898 | 0        | 556730.1 | 13169992 | 14346601 | 0        | 1997585  |
| 59315.21 | 57225.57 | 3462.239 | 3291.698 | 66543.56 | 189971   | 128062.4 | 55324.22 | 0        | 23160.77 |
| 2298063  | 2168472  | 530303.8 | 254208   | 1136766  | 2605316  | 4341989  | 5846968  | 247606.6 | 1485257  |
| 1927315  | 1256514  | 739398.7 | 165739.6 | 376428.7 | 1106897  | 4991433  | 2702072  | 832310.8 | 1001143  |
| 90932314 | 63917008 | 3387477  | 1722405  | 19180965 | 1.18E+08 | 2.07E+08 | 1.65E+08 | 27014741 | 77913232 |
| 1.03E+08 | 1.55E+08 | 23274345 | 11920740 | 215326.5 | 3.28E+08 | 3.85E+08 | 834126.9 | 110698.7 | 1.64E+08 |
| 229784.6 | 144851.8 | 187174.6 | 197252.8 | 167829.4 | 307467.7 | 472110.6 | 178283.9 | 196629.5 | 126700.7 |
| 24024776 | 16171261 | 3420324  | 4214713  | 13318766 | 40363398 | 36127637 | 35027500 | 2466203  | 10749641 |
| 2331102  | 1109268  | 545803.6 | 2302057  | 1547004  | 7693850  | 2458377  | 2446822  | 788437.4 | 1707770  |
| 125145.1 | 101253.4 | 50274.74 | 48563.46 | 79033.61 | 366815.4 | 247499.2 | 149181.6 | 4623.377 | 60809.71 |
| 13570827 | 8474494  | 1184745  | 858889.2 | 3579734  | 26063204 | 21978540 | 21092291 | 2031012  | 7234888  |
| 1688278  | 842196.8 | 13598.21 | 3182.429 | 130041.5 | 2545276  | 3852338  | 2203789  | 851614.8 | 1976952  |
| 286308   | 40356.62 | 311783.8 | 436966.7 | 186789.5 | 381040.5 | 223174   | 265561   | 338005.5 | 243145.3 |
| 242908.8 | 184809   | 30526.81 | 0        | 36616.24 | 426994.6 | 443930.1 | 268126   | 4326.526 | 115723.2 |
| 4902564  | 5404381  | 61897.63 | 61500.86 | 1638596  | 3009232  | 12625524 | 13814449 | 382940.2 | 1419838  |
| 82152188 | 80100781 | 3672446  | 1856626  | 6626672  | 7491512  | 2.59E+08 | 2.18E+08 | 29915170 | 54446916 |
| 76692.64 | 55210.06 | 38660.03 | 29429.74 | 51762.06 | 151640.5 | 41411.57 | 163025.7 | 11817.34 | 63389.9  |
| 935271.6 | 535265.6 | 0        | 2521.525 | 18376.18 | 1872435  | 1718030  | 1408281  | 165469.5 | 595011.6 |
| 185012.7 | 132057.8 | 95697.46 | 103319.4 | 103359.3 | 234119.8 | 243718.5 | 371485.7 | 136487.7 | 39973.59 |
| 372307.3 | 258514.2 | 20263.99 | 41714.72 | 62935.49 | 797998.8 | 524734.3 | 496653   | 30961.89 | 165845.9 |
| 561992.6 | 396323.7 | 74282.89 | 22304.7  | 157577   | 1017906  | 940910.2 | 639601.6 | 75965.34 | 266991.2 |
| 96749.77 | 34132.03 | 116820.5 | 62949.97 | 143679   | 88152.51 | 115459.2 | 115948.5 | 125937.7 | 41673.32 |
| 300603.9 | 294997.3 | 9669.524 | 9047.362 | 22631.67 | 126780.6 | 881950.1 | 574306.1 | 27937.09 | 170665.3 |
| 1621683  | 1246198  | 42942.5  | 11752.36 | 286984.2 | 2039715  | 3774513  | 2819049  | 369126.6 | 1373247  |
| 402370.2 | 397559.9 | 17420.95 | 4613.887 | 38468.62 | 536379.5 | 2525526  | 1077635  | 157868.8 | 448670.5 |

|          |          |          |          |          |          |          |          |          |          |
|----------|----------|----------|----------|----------|----------|----------|----------|----------|----------|
| 2.83E+08 | 1.62E+08 | 36770814 | 18025808 | 1.02E+08 | 4.82E+08 | 5.01E+08 | 2.7E+08  | 63699005 | 2.19E+08 |
| 2051659  | 1267306  | 466160.7 | 336366.3 | 1062632  | 1939040  | 4461303  | 1781096  | 507809.4 | 1392128  |
| 922400.4 | 616465.1 | 50752.98 | 35112.01 | 85715.26 | 2772254  | 3372145  | 1458760  | 227362.6 | 709775.3 |
| 738539.4 | 599017.1 | 85246.49 | 48483.11 | 236857.2 | 3369188  | 1431245  | 552544.3 | 36540.08 | 386950.5 |
| 56276385 | 69616596 | 267394.8 | 335035.2 | 25574706 | 5349415  | 1.58E+08 | 1.22E+08 | 0        | 4889545  |
| 5374508  | 4187042  | 7973057  | 3565737  | 7152908  | 8429216  | 4252883  | 11078951 | 119553.4 | 7455472  |
| 71800.34 | 48910.44 | 29427.07 | 32673.79 | 45981.57 | 159033.2 | 173877.4 | 127707.8 | 28194.24 | 29607.75 |
| 2.43E+08 | 1.45E+08 | 63712785 | 65907141 | 1.96E+08 | 6.88E+08 | 4.99E+08 | 3.16E+08 | 42062299 | 1.41E+08 |
| 50449317 | 1.04E+08 | 29323910 | 16423816 | 1.05E+08 | 1791356  | 2.32E+08 | 2.36E+08 | 896003.5 | 5230011  |
| 3832299  | 3753069  | 1485147  | 1901360  | 14154553 | 258266.7 | 7914690  | 9920375  | 4393553  | 808817.4 |
| 3023098  | 1377260  | 1096541  | 4921758  | 3715619  | 1950706  | 1425063  | 1645077  | 3418421  | 5208563  |
| 16043157 | 13264126 | 13048517 | 1879975  | 5754278  | 26469092 | 17604100 | 34050046 | 2346513  | 12241928 |
| 436361.1 | 244015.6 | 468343.4 | 688374.6 | 542848.3 | 522777.6 | 236289.8 | 287519.7 | 318315.4 | 270218.8 |
| 720249.4 | 922737.9 | 9648.055 | 7735.047 | 34658.34 | 1203024  | 1275136  | 1474985  | 18133.29 | 77492.24 |
| 303733.4 | 281039   | 63391.73 | 59104.46 | 94302.62 | 1256791  | 607968.7 | 219319.1 | 30109.66 | 69191.57 |
| 179602.3 | 114317.1 | 106540.2 | 75205.95 | 284426.3 | 517541.6 | 119180.6 | 234836.2 | 76140.18 | 55137.72 |
| 728081   | 821360.1 | 33642.99 | 0        | 256257.3 | 1636686  | 714086.4 | 1259251  | 70078.68 | 129139   |
| 3525474  | 3453522  | 100254.8 | 107589.5 | 2706870  | 1811396  | 8366803  | 2014025  | 219598.9 | 1007101  |
| 2880685  | 3800960  | 45975.42 | 39345.12 | 62516.56 | 3943728  | 5905124  | 2518686  | 54635.12 | 976362.1 |
| 93381.68 | 89894.47 | 24107.99 | 6653.981 | 37123.67 | 27267.18 | 246036.6 | 208500.1 | 3701.522 | 52270.38 |
| 169576   | 135120.6 | 26196.03 | 0        | 60899.07 | 9923.14  | 509330.4 | 338905.4 | 46517.3  | 28656.89 |
| 428663.3 | 271456   | 8068.928 | 12327.49 | 81298.35 | 547096   | 1008170  | 653038.1 | 155231   | 404691.6 |
| 870952.7 | 744566.5 | 69058.43 | 132973.2 | 430740.5 | 4314458  | 1243694  | 930374.4 | 23179.07 | 304431.8 |
| 1197047  | 798314.7 | 117849.3 | 69247.95 | 446708.4 | 2485897  | 1620100  | 933599.6 | 257945.5 | 774091.4 |
| 454526.5 | 431533   | 0        | 0        | 3387.543 | 462714.9 | 1178574  | 965143   | 62599.7  | 367456.6 |
| 1.71E+08 | 2.27E+08 | 7976970  | 4844717  | 11650272 | 1.28E+08 | 4.3E+08  | 5.52E+08 | 557734.3 | 2.01E+08 |
| 6343683  | 7756331  | 336623.2 | 210177.7 | 190612.7 | 3508867  | 17447259 | 19355414 | 21297.7  | 3375415  |
| 308738.5 | 225100   | 185300.9 | 221923.6 | 173385   | 372894.4 | 358393.4 | 574590.6 | 55075.4  | 110758.7 |
| 2745339  | 2556466  | 32027.58 | 59290.74 | 2338003  | 2965026  | 5207341  | 3676529  | 379431.3 | 2245373  |
| 818443   | 301823.4 | 310113   | 187462.5 | 305250   | 619012.4 | 1929292  | 961379.7 | 923278.7 | 1038027  |
| 332799.4 | 318222.4 | 28840.9  | 45943.04 | 58193.98 | 503650.7 | 627379.5 | 713893.2 | 47927.31 | 189553.8 |
| 1047827  | 698423.4 | 61611.95 | 49080.83 | 228538.2 | 2122439  | 1647785  | 1582231  | 125237.5 | 487647.5 |
| 533908.3 | 305667.5 | 3007.891 | 2492.472 | 72784.42 | 854375.8 | 1149650  | 696277.8 | 285661.2 | 654356.2 |
| 546668.6 | 482401.2 | 167562.8 | 100513.7 | 340251.7 | 326870.7 | 1190911  | 420764.2 | 127614.9 | 209087.7 |
| 2937149  | 2877267  | 503456.8 | 571832.8 | 1413724  | 3525953  | 5344701  | 1507296  | 133412.5 | 1087093  |
| 48849074 | 59816072 | 89554247 | 57267929 | 27308183 | 1000111  | 1.45E+08 | 1.5E+08  | 38357055 | 3682049  |
| 97260.54 | 43900.07 | 54574.47 | 80869.31 | 70722.56 | 148129.7 | 79273.14 | 59639.87 | 50355.9  | 93547.57 |
| 690880.4 | 410317.7 | 29939.89 | 7271.675 | 129455.6 | 2346348  | 2149072  | 1120329  | 100337.6 | 690542.4 |
| 497980.3 | 306036.1 | 192055.7 | 263323.9 | 149188.9 | 777852   | 1841784  | 746593.8 | 143101.8 | 189526.7 |
| 156754.8 | 105718   | 2784.809 | 5164.384 | 42654.92 | 337373.9 | 224450.5 | 162793.7 | 11381.36 | 104404.5 |
| 172898.7 | 43055.13 | 157038   | 77410.9  | 153270.7 | 256401.4 | 148720   | 212233.6 | 144480.5 | 168628.9 |
| 196831.4 | 134596.8 | 7624.029 | 0        | 15017.2  | 379995.3 | 358539.9 | 245566.7 | 15735.98 | 98078.08 |
| 44336.58 | 34909.99 | 2078.64  | 0        | 2875.641 | 148629.7 | 151408.4 | 60279.17 | 26579.57 | 92657.49 |
| 2350219  | 1439793  | 52418.2  | 30788.67 | 326265.1 | 4777252  | 3996516  | 3257312  | 326070.4 | 1328822  |
| 209517.6 | 181722.2 | 21214.51 | 8923.706 | 123963.5 | 269125.4 | 396375.9 | 441205.3 | 3950.545 | 46457.06 |
| 11975105 | 9177458  | 2681088  | 4608115  | 9007575  | 42035535 | 18852640 | 12558592 | 1292801  | 5093443  |
| 506838.2 | 469555.2 | 147875.9 | 124804.6 | 349843.6 | 2002112  | 760153.4 | 842393.3 | 65221.81 | 238009.7 |

|          |          |          |          |          |          |          |          |          |          |
|----------|----------|----------|----------|----------|----------|----------|----------|----------|----------|
| 642354.9 | 454406.1 | 155680.3 | 40867.87 | 255859.6 | 2511133  | 1330765  | 522616   | 64081.34 | 420631.7 |
| 446651.9 | 402491   | 2396.987 | 0        | 38955.57 | 519530.4 | 1093675  | 613678.6 | 114914   | 397780.4 |
| 136055.5 | 93456.28 | 52552.01 | 27996.11 | 133469.7 | 70282.01 | 271381.1 | 198301.4 | 0        | 79722.09 |
| 186184   | 155719.1 | 6321.636 | 17606.97 | 43744.74 | 431038.4 | 211641.8 | 338190.7 | 0        | 54444.72 |
| 1075984  | 722278.5 | 126157.8 | 210975.8 | 475033.4 | 3999575  | 2292142  | 1074945  | 130907.5 | 683300.7 |
| 119504.2 | 85745.45 | 11018.38 | 16634.62 | 2921.446 | 54482.57 | 352354.5 | 137847.8 | 12502.84 | 80514.63 |
| 104698.5 | 91256.94 | 0        | 7315.683 | 18050.08 | 202395.8 | 172026   | 220335.1 | 0        | 25965.53 |
| 54815522 | 39740400 | 6161833  | 3944729  | 17778174 | 95134371 | 94317149 | 35198103 | 11201227 | 48595431 |
| 514682.5 | 92063.26 | 574878.1 | 655375   | 443417.9 | 647226.3 | 391750.6 | 526391.5 | 421156.6 | 423567.9 |
| 427900   | 584494.9 | 5637.963 | 93138.07 | 771143.4 | 253728.4 | 403369.4 | 1449257  | 51893.24 | 111678.3 |
| 10905538 | 9583596  | 24075.43 | 0        | 186438.4 | 16490721 | 24119329 | 19237352 | 2633362  | 8270472  |
| 171979   | 112299.5 | 20704.15 | 27277.82 | 200564.6 | 516863.5 | 314731.1 | 227693.7 | 13881.75 | 98853.34 |
| 40182260 | 39840936 | 4843237  | 2116634  | 37821772 | 25701561 | 82972816 | 61615442 | 369090.2 | 15957680 |
| 4433733  | 3657729  | 350170.1 | 169577.8 | 1674785  | 3759220  | 27939010 | 2727427  | 1429082  | 5115818  |
| 26959017 | 34033090 | 18989268 | 1746283  | 24791083 | 998268.6 | 51478950 | 85609244 | 74882.64 | 13334188 |
| 322347.5 | 187321.6 | 43738.28 | 23670.47 | 167991.4 | 191803.1 | 831463   | 261476   | 158352.3 | 183088.9 |
| 1722846  | 2886415  | 0        | 0        | 0        | 1048798  | 4382526  | 6803960  | 11797.61 | 0        |
| 1030685  | 929628.3 | 0        | 27677.13 | 1757398  | 525596   | 1678791  | 2621150  | 517367.9 | 560769.8 |
| 741943.4 | 427267.9 | 84888.46 | 75380.22 | 236408.1 | 1528099  | 1059973  | 1004655  | 148968.6 | 445610.8 |
| 828055.5 | 347416.1 | 220607.2 | 96787.2  | 804100.3 | 250777   | 1974712  | 1061696  | 324344.8 | 952313.1 |
| 1606633  | 1681051  | 0        | 3815.4   | 0        | 17154.72 | 5333897  | 3985516  | 134909   | 922916.7 |
| 301544.6 | 268001.2 | 13274.19 | 15528.04 | 117666.5 | 615367.8 | 400660.6 | 286309.5 | 9623.34  | 107600.1 |
| 42017921 | 42190149 | 23789061 | 15971542 | 61916327 | 12541573 | 51852609 | 1.08E+08 | 584082.3 | 56807726 |
| 370157.3 | 318759   | 0        | 0        | 11632.77 | 8981.944 | 1242512  | 478037.9 | 32513.63 | 186375.7 |
| 4339801  | 5886759  | 1556612  | 1376960  | 2579029  | 8723560  | 1296389  | 3782483  | 6491.938 | 701385   |
| 8612150  | 5505610  | 713487.9 | 515025.8 | 2187495  | 17167502 | 13633991 | 13458165 | 1308546  | 4114605  |
| 118576.3 | 104117   | 0        | 0        | 3133.277 | 0        | 399796.2 | 253229.6 | 0        | 52574.23 |
| 473491.8 | 237787.3 | 138958.1 | 49224.54 | 401481.7 | 1089871  | 1242348  | 445827.5 | 246447.6 | 542868.9 |
| 387954.4 | 277849.5 | 32873.61 | 2554.8   | 114708.9 | 711298.5 | 668318.7 | 347593.7 | 31291.48 | 266770.5 |
| 2565430  | 1784506  | 2017332  | 225856.4 | 664524.4 | 8287623  | 5173399  | 1466197  | 563169.4 | 5280527  |
| 384748.1 | 156056   | 302292.7 | 278618.5 | 299853.7 | 511801.1 | 363735.2 | 332216.9 | 364051.2 | 170055.4 |
| 448722.5 | 304496   | 65269.25 | 54337.92 | 197209.3 | 1436450  | 1164643  | 636181.2 | 82014.95 | 237454.4 |
| 1033513  | 1090212  | 226096.1 | 154773.1 | 470906.1 | 1725055  | 1397559  | 1597701  | 150451.1 | 377746.2 |
| 307695.9 | 261084   | 3383.575 | 5270.126 | 7663.61  | 395938.2 | 741849.1 | 548438.2 | 74978.2  | 274862.3 |
| 246819.9 | 198462   | 16022.2  | 44962.09 | 27804.75 | 765648.5 | 802036   | 346763.9 | 20659.59 | 121789.1 |
| 2598237  | 1687559  | 209384.4 | 113009.4 | 689500.7 | 5185526  | 4117299  | 4036664  | 343494.7 | 1257388  |
| 1373604  | 705206.6 | 1350528  | 1996394  | 1674200  | 1749687  | 856104.1 | 2315633  | 1192196  | 474853.2 |
| 370994.3 | 342529.6 | 30024.26 | 12138.17 | 42489.41 | 116590   | 1117703  | 878218.5 | 66404.44 | 328137   |
| 561206.5 | 293571.9 | 299723.2 | 364970.9 | 318465.9 | 1320849  | 1008247  | 880467.3 | 221496.4 | 280452   |
| 58248620 | 34052048 | 7342766  | 3338823  | 20695668 | 1E+08    | 1.04E+08 | 55227823 | 12562955 | 44352037 |
| 348054.2 | 301763.6 | 39935.78 | 7458.472 | 16284.09 | 82691.08 | 1085796  | 802248   | 123372.3 | 234949.3 |
| 308153.1 | 156076   | 178623.9 | 70615.46 | 244211   | 815072.7 | 545160.6 | 399180.5 | 59502    | 254971.3 |
| 634262.6 | 456672.3 | 193090.5 | 337322.9 | 454395.6 | 1643757  | 1252052  | 853515.8 | 62811.08 | 224189.2 |
| 593783.1 | 525321.4 | 255688.3 | 300120.1 | 322284.7 | 1583498  | 1246525  | 802722   | 89685.08 | 250759   |
| 303348.3 | 274347.7 | 38889.16 | 33493.36 | 22976.72 | 220694.9 | 808389.7 | 542682.1 | 61354.74 | 183018.3 |
| 1458466  | 1017543  | 288373.2 | 207112.9 | 973757.2 | 4512274  | 3315913  | 1118969  | 231834.2 | 917720.7 |
| 468460.3 | 368046.8 | 41814.67 | 27836.15 | 44848.98 | 1048697  | 642888.5 | 618308.8 | 29175.51 | 190507.4 |



|          |          |          |          |          |          |          |          |          |          |
|----------|----------|----------|----------|----------|----------|----------|----------|----------|----------|
| 611447.8 | 454638.8 | 54257.04 | 45326.74 | 258839.8 | 2310976  | 1401388  | 777554   | 16370.08 | 256218.8 |
| 4899301  | 4640324  | 866728.7 | 157177.8 | 1319776  | 7581501  | 8953579  | 10163001 | 119901.6 | 398718.5 |
| 1059786  | 642914.1 | 198656.3 | 81413.44 | 408231.1 | 4094512  | 2223316  | 1534512  | 166316.4 | 587347.1 |
| 1685516  | 1196739  | 306889.6 | 296225.1 | 405384.2 | 2181884  | 8796193  | 2193016  | 650934.4 | 3090062  |
| 179916.3 | 121653.2 | 2459.31  | 0        | 12449.9  | 189028.5 | 477549.3 | 233339.1 | 8777.39  | 115582.9 |
| 523640.2 | 274143.1 | 296393.2 | 41906.22 | 576170.9 | 269043   | 1015720  | 786898.5 | 309766.2 | 607064.7 |
| 619147.2 | 533389.8 | 0        | 2915.386 | 15967.22 | 1715427  | 2571788  | 1075259  | 72453.54 | 384876.4 |
| 1526100  | 1823050  | 251794.3 | 287930.3 | 87898.45 | 2100139  | 2887678  | 4753876  | 457196.2 | 467335.9 |
| 4957512  | 3567769  | 666694.4 | 851198.2 | 1478759  | 5882160  | 10810169 | 6852850  | 476912.8 | 4405240  |
| 548864.5 | 299790.4 | 427956.4 | 587098.1 | 514881.5 | 940794.6 | 596717.4 | 660523.9 | 348410.3 | 139508.9 |
| 7306609  | 4803625  | 343674.2 | 241266.8 | 776379.9 | 4249718  | 21530517 | 14392740 | 2169305  | 7068591  |
| 1447970  | 848178.6 | 89119.87 | 56334.67 | 1774210  | 549649.2 | 7970082  | 2648303  | 911797.2 | 1232005  |
| 853342.2 | 562767   | 81894.74 | 63105.44 | 468132.4 | 2624487  | 2275997  | 1466182  | 39633.84 | 544348.9 |
| 1678533  | 880622.4 | 492563.2 | 366950.2 | 999647.8 | 1411588  | 3673013  | 2223390  | 399375.3 | 1689960  |
| 3110467  | 4669841  | 87641.01 | 22374.52 | 0        | 4532097  | 5950502  | 11202282 | 30983.6  | 0        |
| 246840.2 | 182863.6 | 117202.1 | 142079.7 | 419077.5 | 248586.7 | 104552.2 | 463540.3 | 172144.4 | 94119.87 |
| 265853.7 | 247907.2 | 104501.5 | 35798.37 | 208660.8 | 1068211  | 350116.1 | 623154.8 | 8369.016 | 55226.34 |
| 130453.4 | 127489.9 | 27939.91 | 39182.27 | 46228.2  | 334758.2 | 405293.7 | 87144.01 | 26243.93 | 117516.3 |
| 1038702  | 166520.9 | 821049.2 | 1052558  | 1348553  | 675524.4 | 1021893  | 1268277  | 849525.9 | 904668.6 |
| 242436.3 | 154861.5 | 42097.57 | 183095.6 | 103663   | 593835.3 | 563648.6 | 216293.2 | 118667.8 | 75111.82 |
| 458867.1 | 227037.6 | 218777.8 | 830919.6 | 811145.2 | 419050.9 | 337427.2 | 220729.1 | 600730.3 | 778908.5 |
| 463817.9 | 335057   | 128005.9 | 83725.33 | 216339.9 | 1899457  | 750414.6 | 536686.2 | 46029.07 | 188019.6 |
| 5158332  | 4740382  | 96157.39 | 11150.81 | 374694.5 | 6619127  | 12239378 | 9433350  | 758790.5 | 3118457  |
| 139226.5 | 114521.5 | 26923.06 | 3328.546 | 84239.05 | 312619   | 119368.4 | 328510.7 | 32420.01 | 123488.4 |
| 2416119  | 1621778  | 453399.4 | 582047.3 | 1644266  | 5596470  | 6875272  | 3995011  | 336967.2 | 1089054  |
| 1637871  | 692228   | 1048417  | 504484   | 1454722  | 4019321  | 2570554  | 2325711  | 618762.8 | 1528550  |
| 88305.6  | 47917.31 | 0        | 8751.958 | 13043.49 | 90323.52 | 231085.5 | 109684   | 10580.36 | 83788.14 |
| 1.71E+08 | 2.67E+08 | 431101.2 | 72199992 | 500505.9 | 2.3E+08  | 1E+09    | 292001.5 | 245688.6 | 2.42E+08 |
| 5508856  | 6440202  | 530322.7 | 427380.5 | 408396.3 | 5276283  | 13295806 | 16145522 | 3661.492 | 6075117  |
| 1045933  | 1016534  | 304064.9 | 174288.8 | 911760.1 | 640723.7 | 2068670  | 2822153  | 923278.7 | 322479.7 |
| 889885   | 871993.3 | 48781.15 | 11001.59 | 145030.7 | 258467.8 | 2694242  | 2362484  | 309075.8 | 392753.4 |
| 359427.8 | 198100.8 | 134579.3 | 128320.9 | 110750.8 | 486885.9 | 651941.8 | 304378.8 | 184789.7 | 185253.7 |
| 4310478  | 3380818  | 57189.78 | 491086.7 | 799603.1 | 5191334  | 10125964 | 8542256  | 1100091  | 3616324  |
| 10025924 | 11251116 | 6975097  | 3894288  | 15359685 | 1848481  | 10809752 | 27320864 | 231901.3 | 15349431 |
| 1116253  | 712266.8 | 372249.5 | 81394.77 | 464356.2 | 402774.1 | 3006885  | 1721619  | 402586.6 | 750893.3 |
| 936838   | 472353.6 | 246374   | 120407.5 | 958951.9 | 747839.5 | 1862317  | 1384024  | 629874.3 | 1125703  |
| 447666   | 263318.4 | 63495.89 | 52501.13 | 249190.4 | 606318   | 870433.3 | 481291.6 | 82619.72 | 375599.7 |
| 216794.6 | 177078.5 | 1963.859 | 6385.644 | 5764.896 | 290356.7 | 518837.3 | 366576.6 | 4671.343 | 138813.1 |
| 1101257  | 960938.7 | 22604.8  | 13022.14 | 62223.77 | 242124   | 3538769  | 2495624  | 336083.6 | 800152   |
| 3043999  | 2122541  | 97061.29 | 38485.94 | 496200.1 | 8867406  | 10929916 | 4695945  | 730798.6 | 2387067  |
| 1141687  | 1024610  | 45464.45 | 31691.12 | 358105.4 | 1405347  | 2543503  | 1454049  | 172624.3 | 884396.6 |
| 1351650  | 857715.9 | 210184.1 | 215379.2 | 461945.9 | 5027117  | 2931490  | 1869316  | 166085.5 | 1051246  |
| 537807.7 | 786361.2 | 411685.3 | 243834.4 | 725832.2 | 199043.5 | 369857.7 | 61939.07 | 70918.06 | 402241.9 |
| 122005.9 | 88765    | 12630.12 | 4342.86  | 27672.83 | 231426   | 206994.6 | 147081.5 | 20260.02 | 40165.22 |
| 405283.8 | 193803   | 15401.04 | 9743.049 | 121343.8 | 1219011  | 1284865  | 596389.1 | 320289.7 | 282894.2 |
| 516488.1 | 516458.7 | 26044.69 | 5924.349 | 555903.3 | 444840.9 | 2628047  | 377672.9 | 33639.31 | 536443.2 |
| 1039132  | 686631.9 | 496087.7 | 256433.1 | 201807.7 | 1935166  | 1395150  | 2040240  | 276692.6 | 607207.1 |

|          |          |          |          |          |          |          |          |          |          |
|----------|----------|----------|----------|----------|----------|----------|----------|----------|----------|
| 24474876 | 18543881 | 550720.2 | 279186.1 | 1594856  | 44822090 | 47647080 | 40804109 | 5344790  | 16887412 |
| 201282.9 | 125347.6 | 64568.83 | 7925.975 | 117103.6 | 92250.81 | 513275.3 | 235768.6 | 0        | 211231.3 |
| 676364.3 | 500645.9 | 3128.023 | 9286.707 | 11111.46 | 40566.53 | 2301289  | 1198423  | 13153.59 | 375285.4 |
| 297740.2 | 354443.5 | 1026656  | 326310.5 | 55563.05 | 300424.7 | 232007.5 | 250710.8 | 916604.9 | 42892.58 |
| 546402.7 | 394310.8 | 72001.74 | 64555.03 | 96136.6  | 680066.8 | 1241447  | 718462.3 | 147265.7 | 423241   |
| 43804566 | 28168703 | 9030660  | 5986637  | 31227393 | 1.51E+08 | 81882400 | 33078778 | 9723935  | 31200238 |
| 835412.9 | 1294154  | 288358.6 | 81658.5  | 171951.9 | 1095342  | 4575464  | 3135236  | 74440.99 | 424354.6 |
| 1595212  | 1306150  | 0        | 3620.61  | 14123.44 | 68643.66 | 5442949  | 2964740  | 89769.73 | 621355.4 |
| 13751559 | 19711964 | 804511.3 | 620426.9 | 8254291  | 478778.3 | 36501488 | 47440992 | 4433.615 | 4131003  |
| 2210865  | 2084594  | 52877.08 | 91248.13 | 178413.2 | 256975.5 | 7150493  | 4112202  | 37906.65 | 742366.5 |
| 218629.6 | 158141.9 | 29204.32 | 21461.84 | 51242.56 | 432759.3 | 337279.2 | 190271.1 | 13326.27 | 160096.3 |
| 150073   | 153126.3 | 48354.21 | 60063.78 | 60376.66 | 210782.3 | 215098.2 | 203849.4 | 24429.29 | 60484.2  |
| 3638962  | 5723745  | 0        | 10786.83 | 0        | 1903014  | 9968939  | 13427426 | 0        | 20183.77 |
| 8219669  | 10048511 | 6342444  | 3970839  | 8180250  | 4888459  | 31041201 | 4739068  | 441520.7 | 3666044  |
| 1066521  | 579128.9 | 143210.1 | 72475.27 | 406092.9 | 1460326  | 2261886  | 1469370  | 325561.9 | 813983.6 |
| 395775.8 | 553380.2 | 73860.18 | 116291.7 | 94439.93 | 750804.4 | 389197.4 | 1369481  | 127308.9 | 68177.99 |
| 344756   | 225279.9 | 38193.17 | 27721.94 | 19654.3  | 463624.6 | 805232.6 | 662291.6 | 163212.9 | 458029.3 |
| 139257.6 | 111323.3 | 2136.569 | 2681.949 | 3822.429 | 401757.2 | 538127.9 | 244287.8 | 6031.049 | 73717.73 |
| 92151.62 | 112504.1 | 107091.6 | 59661.52 | 76216.69 | 81528.85 | 258014.7 | 267729.1 | 0        | 12829.86 |
| 2.18E+08 | 1.99E+08 | 24407891 | 5208779  | 11705482 | 66858583 | 6.73E+08 | 5.59E+08 | 1.23E+08 | 1.53E+08 |
| 248558.8 | 257621.3 | 74169.26 | 36736.94 | 101978   | 558837.4 | 179158.3 | 537606.9 | 5860.47  | 19387.35 |
| 785646.9 | 596705.9 | 143406.8 | 441252.5 | 430151.6 | 1368604  | 876547.6 | 436221.7 | 122254.6 | 856120.1 |
| 3392351  | 1744987  | 898592.5 | 852183.8 | 2880447  | 2056980  | 7442128  | 4181136  | 951487.7 | 2819136  |
| 1185638  | 572736.3 | 302790.7 | 72274.95 | 427772.5 | 2311015  | 1798095  | 1043069  | 432000.8 | 933015.2 |
| 279565.7 | 209450.7 | 13855.64 | 10938.83 | 128600   | 871483.4 | 797056.5 | 260106.9 | 14924.43 | 150330.7 |
| 2789736  | 1866306  | 633875.9 | 648662.7 | 2230716  | 8970343  | 4986713  | 3682124  | 390062.6 | 1301503  |
| 460689.3 | 406664.4 | 691943.1 | 543731.5 | 634964.2 | 655924   | 179633.2 | 742922.6 | 0        | 61736.66 |
| 698454.8 | 550530   | 39115.53 | 22452.55 | 10577.47 | 2305274  | 2325408  | 1489685  | 106162.2 | 278687.2 |
| 911851.6 | 911961.1 | 0        | 0        | 11087.85 | 555764   | 2701633  | 1623561  | 18094.27 | 885811   |
| 3816584  | 4648827  | 19353.67 | 71076.29 | 1463675  | 6038960  | 19932728 | 1022461  | 269252   | 3235328  |
| 6488990  | 4880732  | 635105.1 | 284767.9 | 2209365  | 13458037 | 9218104  | 12946490 | 598783.7 | 3277011  |
| 115318.6 | 109217.7 | 20582.72 | 6074.781 | 61541.11 | 478278.3 | 208104.6 | 224946.7 | 40434.11 | 61168.8  |
| 542717.4 | 467925.8 | 85738.92 | 57162.29 | 123999.5 | 127385.7 | 1604209  | 1279343  | 141560.8 | 500567   |
| 45242028 | 34458076 | 1202977  | 849223.1 | 3974041  | 75091224 | 95085138 | 83711925 | 10806039 | 29335593 |
| 6725884  | 7824220  | 846918.6 | 925519.8 | 4346372  | 2246202  | 16406589 | 18341499 | 250814.7 | 2940784  |
| 93451.1  | 84342.99 | 0        | 0        | 27644.43 | 502834.7 | 139974.7 | 48712.07 | 0        | 52993.3  |
| 3230438  | 2734366  | 356490.1 | 190893.5 | 924002   | 3405748  | 7655452  | 7402741  | 542293.1 | 1088482  |
| 476669.6 | 141310.3 | 37682.15 | 11735.05 | 163153.7 | 1898507  | 1019217  | 649154   | 380166.2 | 295786.5 |
| 302339.2 | 313232.6 | 248033.8 | 159475.8 | 67567.75 | 540448.5 | 180361.9 | 850104.5 | 147709.9 | 215675.5 |
| 700929   | 468903.2 | 59165.18 | 53603.88 | 39568.63 | 1204553  | 1418394  | 1140758  | 40258.46 | 453597.6 |
| 10029762 | 7006698  | 854746.3 | 563466.5 | 2688256  | 23106655 | 12477691 | 12978372 | 1435199  | 4301221  |
| 848995.5 | 735752.7 | 60663.4  | 34212.04 | 358352.3 | 265037.5 | 2435450  | 1242115  | 21966.74 | 143507.3 |
| 119277.8 | 62615.55 | 73788.58 | 66897.86 | 76883.67 | 235119.5 | 239192.8 | 142013.1 | 42303.61 | 63492.78 |
| 211155.7 | 173948.4 | 12249.28 | 31429.88 | 81238.55 | 722769.4 | 533987.8 | 281599.3 | 7744.338 | 56582.4  |
| 1744443  | 719636.8 | 550836.8 | 277799.4 | 501050   | 9599809  | 1425608  | 1813722  | 698817.3 | 1443675  |
| 349051   | 192332.8 | 295462.5 | 39380.6  | 251058.8 | 854005.1 | 634494.8 | 354031.5 | 273653.5 | 69386.72 |
| 708686.1 | 702163.6 | 9499.033 | 0        | 84202.86 | 77920.07 | 2304612  | 1863290  | 119393.4 | 297379.8 |

|          |          |          |          |          |          |          |          |          |          |
|----------|----------|----------|----------|----------|----------|----------|----------|----------|----------|
| 1.29E+09 | 1.11E+09 | 76463220 | 41746656 | 6.87E+08 | 1.02E+09 | 3.15E+09 | 1.53E+09 | 1E+08    | 2.17E+08 |
| 209101.4 | 176676.2 | 101104.9 | 135232.4 | 103119.4 | 105209.4 | 971792.3 | 505034.5 | 35466.05 | 173835.9 |
| 5514914  | 2729350  | 3063218  | 4398543  | 4011899  | 6403726  | 6929600  | 4809210  | 1898728  | 4550540  |
| 724637.6 | 647342.5 | 0        | 0        | 6215.055 | 1029977  | 1707980  | 1805621  | 124535.2 | 442855.7 |
| 149513.1 | 120854.8 | 0        | 0        | 23449.81 | 443820.1 | 85389.94 | 216396.3 | 0        | 43256.81 |
| 210883.6 | 118387.5 | 160267.4 | 155275.4 | 120067.8 | 174936.5 | 321119.1 | 263243.2 | 68893.79 | 178907.1 |
| 32847789 | 20184404 | 2844773  | 2150121  | 9135807  | 73211874 | 44512436 | 43025375 | 5203801  | 18115437 |
| 8554180  | 3983887  | 2951092  | 1746751  | 3146150  | 43437416 | 7677115  | 7744913  | 3388854  | 6824554  |
| 78400.58 | 57059.88 | 4255.699 | 0        | 3346.603 | 13461.41 | 259876.8 | 108764.5 | 10739.31 | 45030.27 |
| 9427652  | 7214209  | 899740.8 | 534689.4 | 2683535  | 16934669 | 16526171 | 5762804  | 1509953  | 8303349  |
| 33777714 | 21744804 | 3388413  | 2125255  | 9596894  | 76637225 | 43402113 | 44346630 | 5221751  | 16711058 |
| 155824.9 | 129461.5 | 2405.869 | 3654.577 | 4739.825 | 27437.66 | 514878.3 | 221501.5 | 53536.98 | 155072.9 |
| 686858.2 | 495670.9 | 86598.95 | 27524.4  | 216711.7 | 1153991  | 1273469  | 1102228  | 19318.59 | 364970.3 |
| 1340089  | 1165138  | 560082.8 | 3417296  | 2044713  | 1157967  | 922922.2 | 704170.7 | 841691.6 | 3420383  |
| 109079   | 117612.9 | 4061.929 | 12709.59 | 6864.513 | 231910.9 | 154277.3 | 196270.4 | 0        | 8166.186 |
| 155531.4 | 132481   | 45233.84 | 26569.34 | 107147.2 | 420470.9 | 376904.2 | 106546.6 | 12728.5  | 77129.52 |
| 200349.1 | 145595.8 | 7227.388 | 3047.762 | 40387.12 | 430392.2 | 308971.6 | 300772.5 | 19512.58 | 79680.33 |
| 1549235  | 851872.3 | 917073.2 | 578963.1 | 896179.4 | 1668055  | 2661741  | 2525159  | 477411.4 | 1764317  |
| 3948159  | 2320177  | 418497.3 | 158279.9 | 1371059  | 6880556  | 7261178  | 3878591  | 644845.6 | 3063756  |
| 1269338  | 908106.2 | 10223    | 0        | 17140.14 | 0        | 4428586  | 2259225  | 32595.01 | 698106.7 |
| 298854.2 | 313917.9 | 172203   | 606973   | 455420.1 | 355484.8 | 215715.3 | 137974.3 | 159130.7 | 851528.4 |
| 6233745  | 4195170  | 846667.1 | 718185.5 | 2294083  | 12151322 | 9355073  | 8254647  | 514240.5 | 3122620  |
| 1267134  | 1307778  | 346355.7 | 47406.99 | 2866344  | 319960.6 | 1262520  | 3482349  | 228108.6 | 492369.7 |
| 344761.5 | 83596.94 | 334830.2 | 454170.6 | 367533.3 | 353482.7 | 300789.5 | 258258.6 | 318020.9 | 329793.7 |
| 418497.6 | 270783.4 | 83670.68 | 108424.5 | 91085.4  | 663351.1 | 771490.1 | 639483.7 | 36638.16 | 230966.6 |
| 408558   | 372735.8 | 20421.57 | 109487.3 | 92503.62 | 287218.3 | 1050829  | 694718.8 | 67319.32 | 219542.2 |
| 159431.1 | 93062.93 | 45047.52 | 110168   | 167038.1 | 276810.4 | 324802.6 | 280953.5 | 39927.69 | 102049.6 |
| 572128   | 351748.2 | 56665.74 | 90227.33 | 57260.54 | 1504126  | 536375.7 | 1100187  | 190907.2 | 361803.8 |
| 19990057 | 23660561 | 711537.3 | 473446.7 | 842795.8 | 24404300 | 46742803 | 59213761 | 337035.1 | 23350955 |
| 400848.1 | 269479.8 | 37412.43 | 12427.46 | 79410.88 | 835987.3 | 636027.7 | 652561.9 | 53650.53 | 170385.2 |
| 163452.8 | 51733.42 | 155214.4 | 214390.1 | 34326.59 | 196366.8 | 142563.2 | 228758.9 | 155941.1 | 122219.4 |
| 144242   | 124175   | 5038.56  | 2150.798 | 52813.52 | 833750.7 | 153594.4 | 205733.6 | 12885.03 | 40836.07 |
| 577422.2 | 370221   | 191902.7 | 136505.1 | 783702.4 | 228871.5 | 1070249  | 1092051  | 186968.1 | 391323.6 |
| 37869984 | 23910382 | 3585383  | 2244552  | 10647518 | 84741305 | 50993809 | 50190395 | 5964092  | 19426772 |
| 318179.8 | 461365.1 | 98012.61 | 116947.8 | 140201.2 | 658749.5 | 129897.3 | 203234.1 | 44156.41 | 92528.29 |
| 1250049  | 777934.2 | 76295.75 | 31089.86 | 221614.1 | 3884731  | 3969658  | 1896037  | 263475   | 1093228  |
| 1020030  | 748813   | 165999.8 | 243435.6 | 984700.9 | 3613324  | 1456814  | 1134699  | 81440.58 | 504855.8 |
| 6196011  | 3497408  | 894520.9 | 400536.1 | 966773.2 | 14190310 | 8482812  | 11185828 | 2258305  | 4182648  |
| 4755457  | 2349152  | 5141051  | 3381637  | 10741360 | 1825437  | 6198821  | 8494497  | 4172242  | 5416896  |
| 2196118  | 1663712  | 244676.4 | 189001.6 | 821151.3 | 2191223  | 5247352  | 3935474  | 525904.8 | 2272260  |
| 66311015 | 41339056 | 52754.06 | 75272.01 | 297654.1 | 1.45E+08 | 1.15E+08 | 85615520 | 8876543  | 38032625 |
| 180904.3 | 84755.97 | 148734.3 | 155261.9 | 85113.47 | 290280.2 | 340713.8 | 171913.4 | 104424.1 | 114324.8 |
| 158656.9 | 36186.48 | 165751   | 154208.4 | 135754.2 | 200639.5 | 91137.01 | 200935.1 | 154566.7 | 122282.5 |
| 82144521 | 89681365 | 52568843 | 31330820 | 81593086 | 33876888 | 1.27E+08 | 2.25E+08 | 1094158  | 30531380 |
| 90660.45 | 92147.44 | 24176.28 | 27537.83 | 173451.1 | 79191.88 | 55060.69 | 190166.1 | 30770.76 | 42174.7  |
| 247775.2 | 239829.7 | 14828.99 | 0        | 43799.79 | 466077.1 | 430415.7 | 515297.1 | 11308.21 | 27366.94 |
| 292800.6 | 34686.28 | 245340   | 287363.7 | 286514.7 | 358982.9 | 333477.8 | 309707.7 | 313425   | 280386.4 |

|          |          |          |          |          |          |          |          |          |          |
|----------|----------|----------|----------|----------|----------|----------|----------|----------|----------|
| 310782.6 | 344493.3 | 9692.849 | 12424.22 | 27003.35 | 422916.1 | 690277.6 | 371913.9 | 12673.79 | 224545.3 |
| 717108.4 | 490081.6 | 126612.2 | 42138.81 | 247994.7 | 1103556  | 1396212  | 901264.9 | 58369.44 | 406901.1 |
| 1654674  | 1450779  | 146581.9 | 34702.35 | 302433.5 | 929669.8 | 4766773  | 1443610  | 309565.4 | 700664.3 |
| 538488.6 | 433445.3 | 17933.51 | 35518.94 | 31620.63 | 1001972  | 2655811  | 694846.1 | 38343.23 | 457799.1 |
| 435701.3 | 287317.3 | 40594.8  | 38844.99 | 35887.6  | 441278.6 | 1146096  | 818455   | 138255.9 | 347999   |
| 588399   | 388793   | 116277.9 | 153016.5 | 330106.5 | 863618.6 | 1002805  | 786429.7 | 74963.37 | 304718.9 |
| 5529398  | 7869307  | 1779552  | 902175.2 | 2391601  | 11852632 | 3056599  | 3370687  | 883525.9 | 1897417  |
| 267401.2 | 221961.9 | 0        | 0        | 0        | 394673.6 | 632754.8 | 445880.1 | 6163.564 | 272405   |
| 352302.3 | 337046.7 | 15450.67 | 13138.12 | 37477.88 | 498896.9 | 786120.3 | 386446.2 | 40052.93 | 308032.3 |
| 31088925 | 26626401 | 32428715 | 15248791 | 78075358 | 9629269  | 52536735 | 68261502 | 1435226  | 47829146 |
| 49301.75 | 21779.98 | 27349.95 | 38699.68 | 30321.94 | 56215.54 | 70127.71 | 56936.88 | 38741.82 | 23863.92 |
| 530864.8 | 802188.3 | 145170.8 | 622945.3 | 133540.7 | 879255.1 | 128766.6 | 1950918  | 94094.25 | 93626.88 |
| 2014248  | 834677.1 | 1023458  | 1095408  | 1571391  | 3128912  | 4798353  | 2793863  | 770528.4 | 1635503  |
| 11728012 | 13791904 | 2665993  | 3753183  | 4071588  | 11696131 | 22805872 | 36031707 | 3363076  | 3342206  |
| 305238.1 | 183934   | 84091.41 | 61217.25 | 170767.5 | 819473.6 | 743328   | 454649.6 | 43231.86 | 198008   |
| 3.15E+08 | 3.17E+08 | 2.94E+08 | 1.58E+08 | 7.17E+08 | 1.21E+08 | 6.33E+08 | 8.35E+08 | 2243935  | 3.56E+08 |
| 216972.5 | 191267.7 | 0        | 0        | 4818.731 | 228218.8 | 584848.6 | 473018.3 | 72711.33 | 355770.2 |
| 3708534  | 3241513  | 12416.71 | 4628.73  | 289956.6 | 5949091  | 8075837  | 4476479  | 71663.8  | 793261   |
| 214793.5 | 110798.2 | 45750.89 | 19348.64 | 66470.5  | 283930.9 | 469866.6 | 208883.5 | 38643.54 | 221788.2 |
| 286919   | 207286.5 | 18111.74 | 22004.41 | 72697.81 | 890875.9 | 857079.2 | 401657.2 | 19238.14 | 178506.8 |
| 666316   | 430620.2 | 87445.24 | 68786.36 | 351366.5 | 1877296  | 1808635  | 930182.3 | 73472.34 | 380503.3 |
| 926238.4 | 712676.5 | 240980.3 | 493160.9 | 852211.5 | 3670734  | 702702.2 | 669570.8 | 141546.9 | 532086.2 |
| 3410911  | 2502769  | 2930.402 | 0        | 76034.31 | 119840.2 | 11908027 | 6216351  | 69904.17 | 1912856  |
| 48538.69 | 45240.79 | 5088.941 | 8305.826 | 10493.49 | 74645.7  | 92796.08 | 16774.52 | 0        | 34143.69 |
| 461071.2 | 456515.1 | 0        | 5365.93  | 28761.13 | 350644.8 | 1315760  | 679564.8 | 5188.978 | 76583.72 |
| 2127377  | 1316670  | 455203.7 | 415996.3 | 953777.5 | 3664210  | 3409309  | 3235006  | 368185.1 | 1081304  |
| 709833.4 | 508063.7 | 58911.97 | 34648.94 | 320038.6 | 2885293  | 1366991  | 684606.7 | 41065.18 | 411000.9 |
| 6315101  | 4343663  | 830523.3 | 321980.5 | 1680123  | 11483949 | 11268218 | 7568957  | 811076   | 3289000  |
| 2920124  | 3095358  | 1783662  | 2755933  | 798954   | 4033969  | 2418990  | 8173280  | 2089256  | 686381.7 |
| 10327278 | 4579741  | 3134011  | 5417036  | 9208322  | 12628196 | 15569351 | 14517077 | 3312056  | 8762849  |
| 3167577  | 3427789  | 62406.79 | 54221.35 | 87549.47 | 421855.1 | 10439262 | 7613844  | 0        | 1429707  |
| 314547.4 | 242928.6 | 0        | 4788.475 | 0        | 375614   | 826762.4 | 654692.5 | 86352.93 | 190963.8 |
| 3209463  | 2069653  | 847703.3 | 389820.3 | 2118403  | 4123871  | 5976988  | 3601329  | 470737.1 | 1735507  |
| 9200302  | 6170341  | 1486303  | 511475.9 | 3004916  | 14437896 | 18070753 | 15663179 | 2000512  | 3564138  |
| 1425572  | 991620.6 | 164454.4 | 123403   | 167443.8 | 563616.1 | 4357427  | 1609145  | 8913.012 | 1019336  |
| 244401   | 393014.2 | 64546.39 | 61705.67 | 50640.8  | 492872.4 | 186753.7 | 92334.2  | 10490.18 | 43980.3  |
| 487528.5 | 538487.1 | 81807.64 | 90005.6  | 194416.8 | 981226.1 | 1881894  | 243214.6 | 62978.24 | 149825.9 |
| 18759891 | 11598955 | 1864375  | 1342682  | 5625749  | 36128427 | 31669539 | 29788468 | 3032765  | 10728237 |
| 510420.9 | 323716.7 | 110268.4 | 97858.62 | 294874.3 | 1010863  | 1675681  | 575163.2 | 55191.64 | 348930.5 |
| 3007274  | 3585571  | 1068260  | 1109466  | 5057041  | 787913.9 | 3627433  | 9363218  | 2140494  | 903865.8 |
| 23115145 | 21467958 | 300270.7 | 37324.95 | 910980   | 3171010  | 77627994 | 55541342 | 2582039  | 12900019 |
| 6398223  | 8910473  | 6057444  | 5986338  | 19034790 | 1491486  | 8554307  | 21841054 | 58181.1  | 6084227  |
| 2249835  | 2149839  | 756167.8 | 519505.6 | 2068388  | 347250.3 | 5141326  | 2185280  | 1724405  | 1112113  |
| 184671.8 | 163287.2 | 2924.231 | 2588.639 | 6504.668 | 122671.7 | 551260   | 287224.7 | 45281.1  | 157386.9 |
| 326083   | 179587   | 232473.7 | 155160.8 | 322664.2 | 249309.1 | 990784.4 | 378787.1 | 123949.7 | 325082.3 |
| 404936.1 | 251139.5 | 433240.5 | 160684.8 | 193627.3 | 199753   | 747360.1 | 467285.1 | 118274.9 | 164237.9 |
| 684479.6 | 761833   | 135230.8 | 157391.2 | 320467.1 | 1207134  | 860502.2 | 422172.3 | 93626.91 | 96161.15 |

|          |          |          |          |          |          |          |          |          |          |
|----------|----------|----------|----------|----------|----------|----------|----------|----------|----------|
| 5313536  | 6324479  | 1609808  | 777485.7 | 3601619  | 10716885 | 17734574 | 11894156 | 26753.16 | 620593.2 |
| 1582465  | 1833798  | 5981.179 | 0        | 38923.32 | 1019377  | 4624828  | 4718627  | 258814.7 | 713561.8 |
| 4842001  | 3068157  | 176597.2 | 93771.77 | 854020.3 | 14542603 | 15802760 | 7301189  | 1350314  | 4107459  |
| 41995415 | 37227777 | 511536.5 | 51117.89 | 1789911  | 5101818  | 1.42E+08 | 94457277 | 5847296  | 23537251 |
| 1401998  | 602911.3 | 298238.2 | 388832.6 | 635039.4 | 6104385  | 1713873  | 1483137  | 582547.2 | 1179046  |
| 128717.5 | 100599.7 | 0        | 4433.278 | 163185.6 | 168274   | 194079.1 | 68675.72 | 0        | 228729.2 |
| 12346837 | 8119430  | 1119910  | 733538.6 | 3268056  | 28904772 | 15618470 | 16479617 | 1909559  | 5721175  |
| 15583162 | 14692526 | 13760548 | 9032145  | 38701964 | 5945005  | 26907049 | 36143344 | 52612.08 | 25189250 |
| 963505.5 | 893467.5 | 476435.4 | 135241.6 | 693871.2 | 3812653  | 1122175  | 2257248  | 27122.1  | 276925.7 |
| 2381975  | 1744235  | 368412.5 | 223561.6 | 1413265  | 8042277  | 5036407  | 4437360  | 209723.1 | 1156744  |
| 8.3E+09  | 7.56E+09 | 3.28E+08 | 1.87E+08 | 3.28E+09 | 4.58E+09 | 2.31E+10 | 1.33E+10 | 47589289 | 1.96E+09 |
| 2229049  | 1451923  | 504951   | 894218   | 1875389  | 7560355  | 2949212  | 2432122  | 224877.5 | 1604023  |
| 1354665  | 823579.6 | 144139.1 | 80595.93 | 430195.6 | 2637317  | 2263564  | 1224457  | 223795.7 | 1164670  |
| 1339484  | 867205.5 | 215779.2 | 130605.8 | 549203.8 | 4766480  | 2879694  | 1296731  | 215020.8 | 813121.6 |
| 6023835  | 3671334  | 218095.7 | 109275   | 847451.4 | 12045714 | 11043361 | 8304824  | 869943   | 3392184  |
| 32858097 | 26385929 | 659708.1 | 320288   | 2128714  | 58680472 | 67362375 | 53535334 | 6997463  | 22748388 |
| 1101717  | 802737.5 | 91676.55 | 8963.197 | 64120.2  | 183782.7 | 3679830  | 2507187  | 856928.9 | 868274.8 |
| 2623377  | 2320097  | 831765.4 | 442171.7 | 1599344  | 4350587  | 3541871  | 4824675  | 395326   | 656516.3 |
| 227291.9 | 125510.9 | 0        | 0        | 36425.46 | 277153.2 | 588337.2 | 348064.3 | 24841.32 | 226886.6 |
| 64509159 | 41517194 | 25200499 | 52027766 | 62944070 | 1.24E+08 | 1.05E+08 | 73540456 | 13811339 | 35848492 |
| 1506697  | 711912   | 903625.6 | 712074.5 | 868654   | 2647894  | 3628015  | 1480797  | 498352.4 | 1303595  |
| 30388921 | 40481620 | 14338505 | 15045388 | 97691728 | 23989150 | 44338513 | 1.01E+08 | 1488814  | 8217076  |
| 1.05E+08 | 1.98E+08 | 17852190 | 7862807  | 100736.1 | 447853   | 3.05E+08 | 752051.9 | 68317147 | 762010.7 |
| 1388774  | 970029   | 165842.3 | 61793.67 | 326614   | 2521915  | 2553222  | 1389773  | 237890   | 910865.2 |
| 528897.8 | 400229.4 | 669561.9 | 775678.4 | 126962.6 | 207044.5 | 466578.3 | 1228778  | 491889.4 | 262804.1 |
| 397917.1 | 316545.9 | 30452.76 | 13826.37 | 69440.78 | 824040.5 | 645539.7 | 442841.2 | 57752.08 | 114992.5 |
| 758265.8 | 527852.3 | 33627.59 | 16055.04 | 34968.36 | 396612.6 | 2369023  | 1289174  | 343495.9 | 654002.4 |
| 674156.4 | 139161.3 | 340935.2 | 504445.4 | 905731   | 792207.5 | 611650   | 712618.1 | 501379.2 | 592831.7 |
| 754366.4 | 381577.8 | 115801.3 | 104436.1 | 216969.4 | 1794747  | 866537.9 | 859498.3 | 270643.8 | 441446.2 |
| 4549154  | 4807123  | 737548.5 | 17596.19 | 2669990  | 5760735  | 21960452 | 12737447 | 0        | 2917855  |
| 5008574  | 2656677  | 1276026  | 2064515  | 2936705  | 14506285 | 9447107  | 4718740  | 923514.1 | 4951637  |
| 360148.1 | 377803.9 | 130531.6 | 35721.27 | 172478.7 | 1877919  | 290507.8 | 521581.9 | 11173.27 | 5976.768 |
| 573910.1 | 387642.8 | 61900.36 | 29933.95 | 71271.01 | 1305928  | 833038.3 | 1138377  | 156892.9 | 420432.7 |
| 801695.3 | 441510.5 | 228546.4 | 236793.5 | 41871.8  | 954800.1 | 1840015  | 1011367  | 838311.7 | 474793.4 |
| 383563.2 | 191366.6 | 821016.3 | 1172771  | 100524.9 | 227565.8 | 36894.76 | 380086.5 | 554180   | 456470.5 |
| 760291.7 | 494051.2 | 232685.5 | 386146.5 | 475412.9 | 1281798  | 896848   | 1571472  | 326660.1 | 465070.2 |
| 10729727 | 14094898 | 1328097  | 684694.7 | 2876956  | 8580934  | 25926943 | 35361763 | 42680.71 | 8481239  |
| 462830.5 | 271131.1 | 669289.8 | 787222   | 678859.2 | 433147.3 | 65153.92 | 208010.6 | 332343.2 | 266731.5 |
| 193255.9 | 166944.4 | 7762.681 | 0        | 8294.428 | 130227.6 | 577630.2 | 337785.3 | 24007.55 | 80287.57 |
| 579641.7 | 661447   | 58473.07 | 24400.31 | 249829   | 957298.4 | 951390.1 | 1722059  | 45150.23 | 327692.6 |
| 481042.3 | 299532.5 | 100656.5 | 55122.8  | 284895.8 | 1448662  | 1088308  | 649694.2 | 62378.28 | 271342.7 |
| 3374760  | 2964119  | 28174.21 | 55250.23 | 136452.6 | 6213083  | 6735493  | 5612434  | 605922   | 2165607  |
| 18417293 | 26190900 | 734753.1 | 1207604  | 2181602  | 15118162 | 46445329 | 63357054 | 65599.1  | 19613330 |
| 10791204 | 14910933 | 16923038 | 316721.3 | 236438.6 | 27710089 | 24770580 | 22664488 | 91231.4  | 153913   |
| 6051452  | 3535858  | 949051   | 570212.1 | 2600907  | 10407213 | 10718672 | 6646594  | 1041204  | 4089338  |
| 1700824  | 1133985  | 157925.1 | 50632.49 | 412841.3 | 3520830  | 2757359  | 2628177  | 208776.8 | 755295.7 |
| 88756.81 | 78513.01 | 10576.43 | 6735.317 | 61412.73 | 277452.3 | 205162.3 | 135604.9 | 0        | 12993.17 |

|          |          |          |          |          |          |          |          |          |          |
|----------|----------|----------|----------|----------|----------|----------|----------|----------|----------|
| 645275.2 | 573571.1 | 315774.1 | 330320.4 | 298473.4 | 285213.2 | 1392502  | 700068.8 | 67617.87 | 183268.6 |
| 508146.5 | 396914.8 | 98510.78 | 61816.37 | 326842   | 1368906  | 1301229  | 673577.7 | 41536.52 | 176509.3 |
| 61744198 | 88126370 | 79864759 | 54893341 | 85572575 | 5506214  | 4199039  | 11325345 | 2340857  | 2.1E+08  |
| 6742819  | 4204545  | 2909515  | 1910297  | 8459830  | 16332151 | 9894673  | 10651286 | 447008.4 | 5338010  |
| 436500   | 339098.6 | 5486.359 | 0        | 67072.67 | 461097.1 | 1163053  | 811490.5 | 47472.46 | 344084.2 |
| 363798   | 205452.9 | 272766.8 | 397467.8 | 379882.7 | 638103.2 | 330927.1 | 365739.6 | 198013.9 | 126472.8 |
| 13764500 | 11222110 | 2894309  | 4903905  | 11179468 | 47959749 | 19220299 | 13605479 | 2069698  | 5807112  |
| 786184.9 | 901498   | 155867.7 | 291187.6 | 680989   | 2884398  | 1061428  | 490600.9 | 102596.8 | 280914.4 |
| 149181.7 | 81608.54 | 40290.35 | 16370.26 | 58353.95 | 671275.7 | 194589.2 | 241432.9 | 54173.37 | 72861.25 |
| 143415.4 | 116759.9 | 47438.97 | 50630.1  | 99876.56 | 119311   | 279348.7 | 337551.5 | 29308.5  | 98299.14 |
| 844886.9 | 515681.6 | 47453.44 | 100105.2 | 347887.6 | 1730083  | 1263429  | 1261302  | 134252.7 | 464342.5 |
| 2070243  | 1749206  | 199437.7 | 410321.4 | 627244.7 | 2721168  | 4375038  | 2635162  | 170236.1 | 1553931  |
| 699665.3 | 1004893  | 24718.3  | 0        | 0        | 420675.4 | 1994553  | 2349251  | 13191.55 | 0        |
| 154019.9 | 117478.9 | 43032.81 | 5315.595 | 109037.4 | 217725.7 | 265630.5 | 319096.7 | 49201.48 | 76724.49 |
| 640370.4 | 488929   | 239449.7 | 277426.5 | 327961.1 | 1478531  | 299799.5 | 213438.3 | 1390598  | 839241.6 |
| 1742263  | 1375411  | 3136.624 | 10561.53 | 18258.02 | 3266261  | 8702929  | 2401091  | 59760.7  | 1637180  |
| 513023.3 | 344599.3 | 61707.72 | 44112.62 | 68913.21 | 1187352  | 705541.6 | 708716.6 | 60321.78 | 258470.2 |
| 243420.9 | 93979.46 | 261059.5 | 214830.4 | 297947.4 | 210678.1 | 143801.4 | 251490.2 | 139031.5 | 213068.2 |
| 8652639  | 9851364  | 499927.7 | 296912.2 | 834604.1 | 1770063  | 27510025 | 25954776 | 4098788  | 4044526  |
| 79164.24 | 48430.87 | 0        | 0        | 101582.3 | 292856.3 | 106104.2 | 94483.34 | 24004.01 | 33724.67 |
| 4787412  | 3668807  | 464146.3 | 430466.3 | 2202993  | 19352888 | 8664664  | 6025577  | 169524.8 | 1954019  |
| 214995.8 | 174135.2 | 2826.164 | 0        | 64143.68 | 342692.5 | 448222.3 | 333564.3 | 39976.16 | 85983.89 |
| 37239745 | 37549083 | 2976552  | 1028930  | 2711188  | 3386930  | 1.23E+08 | 1.02E+08 | 17438422 | 26267235 |
| 419214.8 | 297707.3 | 162990.5 | 89940.63 | 355893.1 | 984559.2 | 914407.9 | 355243.9 | 60504.8  | 232322   |
| 722918.8 | 443772.5 | 146370   | 185080.5 | 338951.6 | 1895710  | 1864723  | 843101   | 111083.6 | 482563.6 |
| 784759.8 | 377963.4 | 366949.7 | 571108.3 | 684599.5 | 1641676  | 1168888  | 756813.2 | 314498.1 | 537026.2 |
| 1118501  | 1700916  | 948073.4 | 502031.2 | 2303762  | 138399.5 | 154828.3 | 89541.82 | 1148071  | 54848.78 |
| 334920.1 | 404831   | 83571.24 | 6951.591 | 410832.8 | 308005.4 | 1422405  | 246831.9 | 31403.44 | 182116   |
| 12531862 | 19249117 | 892138.4 | 1049294  | 1295558  | 4751073  | 35275163 | 46508735 | 225659.1 | 3791693  |
| 4675204  | 4062069  | 74273.41 | 45354.34 | 289534   | 7846679  | 10070140 | 8186110  | 847167.3 | 2781723  |
| 4816914  | 5610592  | 1931792  | 1930111  | 7315034  | 105497.6 | 7556625  | 14339908 | 4678406  | 1418366  |
| 167793.8 | 129232.3 | 46874.3  | 20381.55 | 119892.4 | 224822.6 | 289905.8 | 71134.48 | 38368.41 | 122515.4 |
| 50643639 | 49808087 | 9494313  | 3952517  | 1531788  | 13078543 | 1.58E+08 | 1.37E+08 | 44449323 | 31638907 |
| 5023338  | 5656191  | 9532044  | 8630383  | 7523330  | 645457.1 | 4143398  | 2330464  | 139977.2 | 1048882  |
| 623775.7 | 536397.1 | 85234.82 | 82579.68 | 245722.8 | 456847   | 1592148  | 1102368  | 103227.7 | 671056.7 |
| 7533259  | 6568490  | 3489662  | 1372475  | 6840216  | 9695577  | 25451592 | 17619887 | 0        | 4227531  |
| 174470   | 62262.59 | 57698.03 | 63047.16 | 61670.86 | 326828   | 249564.6 | 223871.5 | 77652.88 | 149456.2 |
| 658016.9 | 440818   | 104675.7 | 48605.5  | 249475.3 | 813613.2 | 1479544  | 1053488  | 114046.3 | 372062.8 |
| 169955.6 | 114796.4 | 44018.07 | 11647.95 | 265009.2 | 163049.8 | 566360.9 | 264034.7 | 0        | 169663   |
| 457560.7 | 411604.4 | 162136.7 | 161382.4 | 278047.8 | 1974612  | 411594.9 | 968879   | 79053.48 | 109180.4 |
| 1491023  | 1029500  | 59121.95 | 17676.4  | 457540.6 | 2863998  | 2665276  | 2150611  | 165511.6 | 972263.6 |
| 251384.1 | 197732.4 | 0        | 0        | 0        | 355124.9 | 627156.6 | 423926.1 | 13146.09 | 261665.2 |
| 34973692 | 32673703 | 39392.11 | 10316.95 | 2169225  | 32905257 | 97687750 | 67883605 | 3682299  | 28564751 |
| 858543   | 515894.9 | 361486.4 | 183904.4 | 300510.1 | 400088   | 2245249  | 1057445  | 589698.7 | 370309.4 |
| 323287.4 | 171882.4 | 184154.5 | 162118.4 | 207000.7 | 638651.2 | 668508.2 | 324997.6 | 104790.7 | 328134.5 |
| 293332.9 | 275296.4 | 193535.3 | 68712.67 | 354190   | 117517.6 | 1144205  | 744116   | 113610.5 | 342805.4 |
| 117128.3 | 79525.86 | 82969.69 | 48986.78 | 143137.5 | 376692.5 | 58418.15 | 73941.74 | 67958.73 | 51260.82 |

|          |          |          |          |          |          |          |          |          |          |
|----------|----------|----------|----------|----------|----------|----------|----------|----------|----------|
| 12826520 | 12865646 | 1176856  | 619241.5 | 3037426  | 6577452  | 36968485 | 25806846 | 30209.82 | 3531094  |
| 257694.5 | 156249.6 | 46899.33 | 75759.82 | 121898.4 | 158496.6 | 652749.6 | 422402.8 | 52111.2  | 395296.3 |
| 446502.6 | 393115.6 | 91318.48 | 12340.63 | 41414.51 | 148292.6 | 1382892  | 872834.3 | 18530.96 | 61316.82 |
| 1835804  | 1293618  | 1481169  | 123483.9 | 446167.6 | 5941424  | 3347737  | 1124276  | 371333.6 | 3798052  |
| 667472.5 | 377618.5 | 142841.2 | 548494.6 | 260380.2 | 1684658  | 1312610  | 751501.9 | 200289.7 | 365968.5 |
| 439310.4 | 100535.7 | 332136.5 | 566449.6 | 520891.5 | 517822.6 | 371807.8 | 409602.3 | 522122.9 | 277508   |
| 17706292 | 11251658 | 1846930  | 1163407  | 6441559  | 28997748 | 34740442 | 25720621 | 2038294  | 14578837 |
| 308845.9 | 179763.8 | 113239.1 | 113897.2 | 116012.3 | 121050.1 | 800366.9 | 490383.2 | 33521.63 | 327736.6 |
| 2595924  | 2118108  | 595990.9 | 392871.6 | 1214661  | 2536900  | 12713465 | 5462810  | 617949.3 | 841743.7 |
| 8256750  | 7684075  | 14848.97 | 2695.553 | 435581.6 | 7375298  | 23516421 | 15816303 | 857237   | 6707796  |
| 13892543 | 9508527  | 1419567  | 606789.2 | 3458736  | 25366514 | 25962183 | 15619690 | 1588726  | 7875596  |
| 48603.46 | 36432.31 | 5070.62  | 0        | 7030.101 | 103240.8 | 80133.74 | 31293.32 | 3459.554 | 41399.66 |
| 5908693  | 4567038  | 234500.5 | 343808.5 | 3893587  | 8893485  | 25139184 | 9806704  | 124186.6 | 3081475  |
| 590181.6 | 405696.4 | 62625.85 | 43409.73 | 163884.8 | 1140488  | 1010869  | 841972.8 | 37301.56 | 346616.3 |
| 2161817  | 1712460  | 139939.4 | 189470.2 | 465855.5 | 1257364  | 6302274  | 3935821  | 115976.7 | 559307   |
| 561906.3 | 562686.8 | 0        | 0        | 13651.61 | 108498.5 | 1899323  | 1496379  | 12596.19 | 355890.6 |
| 850506.7 | 406982.2 | 936433.4 | 1110617  | 955549.7 | 887136.1 | 705858.3 | 873192.7 | 728086.8 | 300813.4 |
| 679050.1 | 483050.5 | 442134.5 | 629132.3 | 184665.9 | 2192094  | 670342.5 | 795452.8 | 335532.4 | 146994   |
| 5444217  | 5699170  | 0        | 54049.75 | 712528.7 | 1540050  | 17519127 | 11587743 | 25341.53 | 2079825  |
| 57504924 | 55062952 | 5959776  | 1669951  | 2207445  | 14923285 | 1.87E+08 | 1.52E+08 | 35836142 | 40031959 |
| 8.91E+09 | 1.08E+10 | 8.55E+09 | 4.27E+09 | 2.2E+10  | 3.6E+09  | 1.66E+10 | 2.5E+10  | 32297233 | 1.48E+10 |
| 662202.7 | 405452.9 | 338739.6 | 276239.1 | 332847.5 | 747926.4 | 1181443  | 598155   | 188527.7 | 511618.3 |
| 440214.6 | 274190.7 | 63069.53 | 83943.09 | 118113.9 | 774250.2 | 796650.9 | 707097.2 | 83074.68 | 268301.3 |
| 2870218  | 1764613  | 242216.2 | 323721.6 | 2528756  | 3803461  | 5275276  | 2442302  | 206655.7 | 3025185  |
| 177523.6 | 174626.7 | 32666.78 | 33777.86 | 81987.13 | 352457.6 | 214187.8 | 106075.5 | 4977.285 | 65999.14 |
| 644716.2 | 440342   | 81086.63 | 20301.88 | 205116.4 | 1172485  | 1174783  | 760665.3 | 73540.84 | 381034   |
| 2145995  | 1404963  | 59274.31 | 29473.94 | 7940.953 | 3873548  | 4646406  | 3544039  | 33650.86 | 2136364  |
| 184535.9 | 167783.9 | 10762.19 | 2365.339 | 21985.39 | 342909.2 | 352636.4 | 283244.6 | 18994.97 | 58238.07 |
| 321468.7 | 236263.6 | 34189.48 | 16517.57 | 164664   | 919925.9 | 871729.4 | 378012.2 | 29060.44 | 131177.7 |
| 2478496  | 1268864  | 28953.38 | 8939.371 | 229778.2 | 3651756  | 6097915  | 3142602  | 1363050  | 2832787  |
| 183421.6 | 184283.7 | 0        | 4031.162 | 14596.65 | 201059.6 | 482762.7 | 228480.8 | 32956.7  | 126856.2 |
| 1300445  | 794482   | 127131.8 | 85310.21 | 410031.6 | 2544111  | 2220263  | 1179221  | 207559.5 | 1107989  |
| 175199   | 131468.6 | 6000.11  | 0        | 7055.924 | 256786.1 | 425150.3 | 358210   | 87948.02 | 121740.1 |
| 1861573  | 1789854  | 198170   | 119293   | 889572.5 | 3278619  | 3007664  | 4763674  | 212880.4 | 1125773  |
| 903575.7 | 337077.2 | 349050.2 | 306438.3 | 617543.2 | 2232374  | 1754196  | 996178.3 | 381042.6 | 822188   |
| 39820408 | 36257220 | 482710.3 | 65822.47 | 1143444  | 5677896  | 1.37E+08 | 91801985 | 5317118  | 21938242 |
| 401206.3 | 252288.8 | 126669.6 | 230866.9 | 182310.4 | 405129.8 | 1575777  | 502839.8 | 235571   | 194776   |
| 1233642  | 1379409  | 108606.1 | 113805.2 | 312668.4 | 1600639  | 6381498  | 1437264  | 77801.34 | 507714.9 |
| 177690.1 | 130591.8 | 7176.401 | 5159.945 | 56450.22 | 340102   | 315447.2 | 120186.2 | 29750.15 | 122018.8 |
| 495019.3 | 478245   | 2743.524 | 3272.657 | 137851   | 213860.2 | 1502788  | 981885.5 | 50525.17 | 343152.3 |
| 1820674  | 990154.4 | 858169.7 | 127013   | 501493.8 | 4555660  | 5081525  | 1671576  | 161299.2 | 2478468  |
| 612211.6 | 870988.7 | 133540.2 | 572355.8 | 3038108  | 298505.1 | 184539.7 | 2157047  | 127095.8 | 243528.9 |
| 7395954  | 5335446  | 537956.6 | 673983.8 | 1665114  | 8571907  | 39208024 | 9008696  | 254750.5 | 3508439  |
| 28560285 | 21062715 | 2856349  | 1943318  | 11083164 | 62574242 | 38385838 | 54402828 | 2941641  | 13971356 |
| 177205.1 | 115210.3 | 44532.31 | 27392.41 | 67236.53 | 460879.4 | 489516.3 | 186150.7 | 35944.26 | 86980.25 |
| 170050.8 | 202457.8 | 91482.55 | 80716.72 | 116205.7 | 232830   | 162887.5 | 137644.6 | 61910.14 | 80236.65 |
| 531737.3 | 337755.1 | 64498.36 | 40390.29 | 260062.6 | 826755.4 | 1031282  | 710391.4 | 33022.92 | 331630   |

|          |          |          |          |          |          |          |          |          |          |
|----------|----------|----------|----------|----------|----------|----------|----------|----------|----------|
| 118909.7 | 54863.9  | 48931.52 | 62630.51 | 28398.42 | 40319.51 | 311814.1 | 144868.8 | 98350.9  | 98341.03 |
| 144809.3 | 84713.14 | 136265.9 | 137464.5 | 41574.52 | 343731.2 | 171736.5 | 131553.1 | 80348.54 | 64694.56 |
| 4134265  | 2943471  | 1486424  | 304023.1 | 2151992  | 1780239  | 10942349 | 8117029  | 1807613  | 1929995  |
| 323778.5 | 323939.2 | 0        | 3964.291 | 0        | 338958.9 | 889330.6 | 485967.8 | 67582.6  | 260190.2 |
| 5945644  | 3800377  | 788852.2 | 364610.8 | 2445499  | 10353474 | 10834947 | 4970050  | 913494.6 | 4346809  |
| 268169   | 149955   | 50420.9  | 33994.9  | 72823.77 | 458623.5 | 509105.7 | 441996.3 | 94678.97 | 164645.1 |
| 605233.8 | 445555.9 | 211481.1 | 40567.16 | 372811.3 | 820427.3 | 1102414  | 542111.3 | 60446.01 | 349835.3 |
| 209309.3 | 150216.6 | 11835.56 | 0        | 50479.28 | 393628   | 395504   | 211952   | 5879.431 | 147583.6 |
| 235393.4 | 136668.9 | 31509.33 | 34714.64 | 42840.61 | 267352.7 | 586470   | 385691   | 43129.06 | 155027   |
| 2103758  | 1365180  | 470762   | 197622.8 | 961018.5 | 3099317  | 8771650  | 2649283  | 473795.6 | 1112876  |
| 912757.2 | 590024.7 | 164623.6 | 168627.1 | 356044.3 | 1736121  | 1409750  | 1430560  | 130151.3 | 472981.6 |
| 863479   | 1020548  | 244514.2 | 327162.6 | 216437.6 | 1776380  | 820165.3 | 2612397  | 271587.9 | 176340.5 |
| 2127656  | 1337111  | 182834.5 | 92067.18 | 458145.8 | 3324730  | 4663394  | 3527199  | 332047.8 | 1372188  |
| 114215.3 | 92259.23 | 37781.62 | 11089.41 | 32634.38 | 355249.9 | 276966.1 | 119091   | 0        | 53589.09 |
| 387305.9 | 232145.7 | 28173.53 | 13020.26 | 116824.7 | 289025.3 | 1096429  | 648716.6 | 74832.83 | 275163.6 |
| 349823   | 207842.8 | 196599   | 61611.41 | 194046.2 | 158189.5 | 848861.6 | 449113.1 | 129686.5 | 144119.8 |
| 979329.9 | 704588.4 | 97401.48 | 35486.63 | 198812.1 | 2062712  | 1594313  | 1505660  | 134176.1 | 358217.5 |
| 2817629  | 1453491  | 651419.2 | 403395   | 1242919  | 3767687  | 5891228  | 3477438  | 673800   | 2084297  |
| 192701.2 | 177391.3 | 10638.7  | 3748.801 | 64807.36 | 731039   | 437054.9 | 216610.7 | 10278.41 | 73035.76 |
| 1969119  | 1218846  | 310132.3 | 188279.4 | 610988.1 | 2151587  | 9975325  | 1535160  | 556356.3 | 1444727  |
| 12866630 | 8337396  | 1167419  | 723620   | 3379517  | 30336001 | 16949397 | 17328657 | 1866435  | 6233539  |
| 1043162  | 768291.8 | 157810.1 | 256814.4 | 982605.3 | 3608770  | 1436528  | 1115997  | 101417.9 | 529247.3 |
| 734483   | 629333.1 | 24730.02 | 7365.454 | 68485.22 | 772930.8 | 1989516  | 1615812  | 65056.54 | 374894.4 |
| 212426.9 | 112088   | 68997.34 | 43699.05 | 388782   | 115917.4 | 669639.2 | 302747.8 | 96142.89 | 156021.3 |
| 8.26E+08 | 1.82E+09 | 3091272  | 4.23E+08 | 4475758  | 2.12E+09 | 5134135  | 17661574 | 2185876  | 10232084 |
| 778264.9 | 632812   | 84803.38 | 52652.5  | 171798.9 | 1077597  | 1753115  | 1207768  | 91861.59 | 451860   |
| 1251875  | 1001949  | 517552.2 | 3218192  | 1927067  | 923427.5 | 807538.9 | 569806.8 | 804625.1 | 3020266  |
| 433987.9 | 542832.2 | 342158.1 | 403647.5 | 747657.4 | 104136.2 | 108005.5 | 107927.1 | 303718.4 | 71675.21 |
| 11057755 | 10425154 | 1341365  | 792784.9 | 5030475  | 18503670 | 19097980 | 28538847 | 1446420  | 7138361  |
| 262910.5 | 277338.5 | 15760.17 | 26827.11 | 211210.4 | 709411.3 | 687764.3 | 722740.3 | 30920.28 | 60454.99 |
| 122156   | 144537.1 | 20575.18 | 154571.4 | 51352.43 | 133111.6 | 130870.1 | 86274.49 | 4166.494 | 47938.26 |
| 16206786 | 21645635 | 615588.3 | 557614   | 238182.2 | 14187214 | 43714620 | 52523356 | 63118.04 | 18589915 |
| 4572842  | 2856983  | 1720762  | 256613.4 | 2358560  | 2516721  | 11863544 | 7846776  | 2341112  | 2631230  |
| 1829182  | 1239496  | 56563    | 192374.9 | 70236.53 | 2527553  | 4507405  | 2842199  | 438726.4 | 1477019  |
| 2781810  | 2497785  | 124767.1 | 72735.39 | 277237   | 1109993  | 8857349  | 6288557  | 776099   | 1542941  |
| 2194242  | 1478887  | 226234.3 | 84068.01 | 541181   | 4807228  | 3331515  | 3398164  | 343227   | 962770.8 |
| 102551.9 | 87709.35 | 0        | 0        | 0        | 14511.17 | 359295.9 | 151277.9 | 5993.184 | 162029.7 |
| 286048.3 | 409542.9 | 86225.63 | 94635    | 97808.04 | 681808.2 | 99315.49 | 112125.9 | 23760.01 | 60275.31 |
| 553311.6 | 594629.4 | 90363.22 | 84635.81 | 246771.7 | 1076917  | 708120.5 | 1518678  | 49775.95 | 159030.1 |
| 430324.4 | 247167.7 | 96191.2  | 57610.17 | 254290   | 405443   | 993756   | 508249.5 | 83899.97 | 281003.5 |
| 155513.8 | 259462.4 | 2564.117 | 3188.381 | 5419.019 | 186289.1 | 349785.9 | 618551.2 | 20432.82 | 48683.92 |
| 4857359  | 3362894  | 445310.9 | 271082.1 | 1386323  | 9951471  | 7926667  | 8833800  | 615003.1 | 2463889  |
| 3498330  | 3375636  | 2351.969 | 5371.623 | 173163.2 | 3235064  | 9950706  | 6844396  | 342678.9 | 2688852  |
| 945395.7 | 798156.9 | 511538.8 | 1379809  | 581689.7 | 1606200  | 1363464  | 1060699  | 336162.9 | 423233.2 |
| 179262.7 | 145471.7 | 2186.911 | 2756.474 | 9779.506 | 110392.6 | 558347.6 | 146670.2 | 44058.65 | 299217.4 |
| 180754.5 | 116822   | 131690.9 | 225215.5 | 145452.3 | 225184   | 74800.77 | 199014.9 | 24258.55 | 103960.9 |
| 752710.4 | 495348.5 | 40278.25 | 27519.72 | 197942.7 | 1376825  | 1454743  | 941147.2 | 76351.71 | 394406   |



|          |          |          |          |          |          |          |          |          |          |
|----------|----------|----------|----------|----------|----------|----------|----------|----------|----------|
| 517945.1 | 392214.1 | 0        | 4456.689 | 3572.711 | 474355.3 | 1525966  | 751751.3 | 74073.21 | 557186.9 |
| 2729143  | 1675013  | 87353.27 | 69676.11 | 423453.6 | 5746877  | 4840255  | 3819451  | 421790.1 | 1475706  |
| 2450905  | 1475298  | 715805.6 | 582325.5 | 1215002  | 7791170  | 4597745  | 2841217  | 593228.8 | 1256032  |
| 25473823 | 23260862 | 845320.5 | 480844.8 | 12010834 | 15250039 | 70756390 | 22603507 | 1541391  | 5838128  |
| 538883.1 | 408077.4 | 36145.71 | 23216.22 | 118201.7 | 1047455  | 971583.4 | 550129.5 | 10640.52 | 267123.2 |
| 1037719  | 883263.8 | 0        | 9321.165 | 81612.4  | 1617220  | 2408528  | 1508195  | 376828.3 | 779144.8 |
| 1420535  | 1234001  | 73371.99 | 6812.452 | 167333.7 | 325890.2 | 4722047  | 3062840  | 375501.4 | 911738   |
| 1221110  | 713111.8 | 333354.6 | 513119.2 | 495374.1 | 5115590  | 1291316  | 1346303  | 209795.8 | 820771.3 |
| 1814185  | 1486532  | 25028.98 | 2656.374 | 151799.3 | 418229.8 | 6151357  | 4185181  | 170293.7 | 1113921  |
| 223247.8 | 77334.96 | 178795.9 | 259960.3 | 171012.3 | 355164.4 | 231682.4 | 350874.3 | 206553.7 | 232173.9 |
| 18802903 | 13261192 | 2340189  | 1698892  | 9680228  | 56996483 | 45440092 | 33998240 | 1797243  | 9248273  |
| 2232497  | 1886366  | 320996   | 151441.1 | 1292526  | 4498044  | 2929324  | 4936408  | 149673.9 | 893472.7 |
| 93181409 | 1.27E+08 | 123255   | 18583540 | 70089327 | 583948.2 | 2.53E+08 | 2.33E+08 | 139416.9 | 381780   |
| 367847.5 | 68517.78 | 305079.1 | 348562.6 | 419470.4 | 564093   | 299132   | 305063   | 426026.3 | 409066.9 |
| 898590   | 480365.5 | 27967.61 | 26607.09 | 35406.9  | 695732   | 2745992  | 1423897  | 607152.8 | 1268498  |
| 339715.9 | 288170.1 | 45918.35 | 32106.69 | 150644.2 | 740757.3 | 419032.1 | 634912.9 | 58608.17 | 276059.1 |
| 6291536  | 4206693  | 1414788  | 946112.6 | 4135629  | 16743357 | 14704649 | 9664042  | 818231.6 | 2760014  |
| 3755922  | 2790899  | 768983.2 | 400746.4 | 2662200  | 2878128  | 8812991  | 8289879  | 647531.9 | 3060009  |
| 1.43E+08 | 92135174 | 24352669 | 10316479 | 56193219 | 2.87E+08 | 2.22E+08 | 2.5E+08  | 26452730 | 79453333 |
| 92991.81 | 84892.46 | 22567.9  | 22401.17 | 38885.34 | 36369.92 | 523634.6 | 96194.88 | 3728.601 | 60776.79 |
| 564417.9 | 481576.2 | 111083.6 | 134850.4 | 233342.6 | 167930.3 | 1581332  | 199269.2 | 163885.7 | 626389.2 |
| 74768.07 | 35715.55 | 59305.54 | 61203.85 | 56243.01 | 96615.15 | 70920.58 | 110780.8 | 26639.31 | 47860.36 |
| 118028.1 | 97937.6  | 22714.66 | 10481.35 | 34303.08 | 404518.7 | 270790.9 | 115747.6 | 6094.794 | 36428.03 |
| 1901427  | 2463445  | 8308.029 | 18598.13 | 118330.3 | 1793741  | 11839268 | 6198632  | 75307.23 | 1428598  |
| 306051.2 | 293274.2 | 15201.28 | 9341.347 | 15926.87 | 718198.7 | 446950.3 | 562199.8 | 60473.92 | 100873.3 |
| 451820.5 | 422305.8 | 2636.169 | 2443.497 | 25836.78 | 143982.5 | 1504304  | 693698.9 | 65080.64 | 405707.7 |
| 117288.3 | 66224.05 | 6795.454 | 0        | 66460.16 | 438490.2 | 223737.3 | 128667.3 | 64217.98 | 66292.96 |
| 4006402  | 2905017  | 112731   | 53258.45 | 542980.3 | 4559522  | 10715414 | 7264237  | 977393.9 | 3485925  |
| 4164649  | 1513576  | 3164137  | 2517505  | 13857923 | 792010.3 | 4551386  | 6155307  | 3260694  | 5382882  |
| 10030661 | 12017093 | 462202.1 | 276195.7 | 6390291  | 10532021 | 50554168 | 4000159  | 32270.63 | 2635114  |
| 171134.4 | 125534.9 | 30427.55 | 23902.56 | 102865   | 543958.5 | 348751.4 | 173657.5 | 4280.049 | 97578.82 |
| 90476.74 | 70629.02 | 0        | 0        | 0        | 233783.1 | 354195.3 | 67292.49 | 6805.374 | 74468.98 |
| 185591.2 | 121849   | 42233.84 | 5864.387 | 81759.7  | 579131.1 | 433623.2 | 132876.9 | 31372.49 | 146902.2 |
| 619140.2 | 534430.4 | 77244.31 | 107237   | 334176.3 | 1403400  | 611797.8 | 1398125  | 65325.99 | 211155.7 |
| 1079605  | 803229.4 | 116227.5 | 211230.5 | 349675.3 | 3795381  | 2280607  | 921595.3 | 115375.4 | 573349.1 |
| 973022.8 | 534711   | 1273123  | 1732234  | 1411010  | 526148.2 | 488692.5 | 865521.9 | 510715.1 | 478675.6 |
| 8198347  | 1862374  | 6201328  | 7941531  | 7739408  | 11563473 | 9576966  | 10789886 | 7564200  | 7707204  |
| 149309.4 | 162313.3 | 21656.27 | 45849.42 | 20125.29 | 106960.1 | 845068.7 | 147355   | 14219.36 | 112364.3 |
| 259013.8 | 217743.1 | 5798.909 | 6820.729 | 4500.452 | 394036.4 | 1349856  | 340043.7 | 0        | 240827.8 |
| 1243734  | 900894.8 | 96862.38 | 52079.03 | 460775.5 | 1946425  | 2580821  | 2030097  | 74366.13 | 767869.3 |
| 289606.5 | 266937.7 | 54963.48 | 58578.87 | 210412.6 | 166790.2 | 1442851  | 734252.6 | 55764.79 | 303320.7 |
| 367999.9 | 321551.5 | 7607.672 | 5051.668 | 11010.13 | 463022.3 | 961770   | 734619.4 | 54726.01 | 219553.2 |
| 780161.9 | 1092898  | 50405.85 | 51769.75 | 28454.04 | 1074926  | 1709831  | 529839.6 | 6560.18  | 225948.4 |
| 770587.1 | 438682.6 | 244522   | 303711.8 | 408874.9 | 1151702  | 2537037  | 625374.2 | 172468.8 | 899567.8 |
| 117753   | 86498.86 | 8485.011 | 9196.396 | 29074.44 | 173738.4 | 262188.5 | 204111.3 | 12185.17 | 46090.02 |
| 5291339  | 7295711  | 16590.87 | 6081.888 | 2161152  | 2565047  | 14702513 | 17826676 | 0        | 2694860  |
| 17183219 | 14607347 | 2333994  | 1578523  | 8724892  | 28740054 | 29715891 | 40254201 | 2439362  | 11466348 |

|          |          |          |          |          |          |          |          |          |          |
|----------|----------|----------|----------|----------|----------|----------|----------|----------|----------|
| 113883.7 | 46483.77 | 51946.26 | 38962.61 | 124391.8 | 282818.4 | 151668   | 118762.1 | 89344.82 | 116730.1 |
| 189361.3 | 77180.87 | 168387.2 | 222739.6 | 199303   | 165360.9 | 127735.9 | 272475   | 89813.51 | 127784.5 |
| 203599   | 169814.8 | 211756.1 | 197753.9 | 191219.5 | 211437.7 | 71320.64 | 176827.4 | 72228.12 | 56806.73 |
| 607676   | 463685.2 | 0        | 0        | 81976.42 | 116338.2 | 2083051  | 1210519  | 234961   | 605058.3 |
| 1782917  | 1672126  | 44188.22 | 6519.682 | 185701.2 | 444879.5 | 5960539  | 4588452  | 481110.9 | 1119902  |
| 219011.3 | 148379.3 | 170836.3 | 246965.7 | 261529.5 | 236269   | 52878.92 | 173022.4 | 87707.06 | 83449.23 |
| 187729   | 141542.3 | 123996.5 | 175357.4 | 246847.8 | 279524.8 | 227619.9 | 215653.1 | 28726.42 | 52433.12 |
| 849494   | 442118.5 | 322174.9 | 171661.5 | 535391   | 1262973  | 1428598  | 938989.8 | 224934.7 | 589721.4 |
| 11909332 | 9608641  | 5234524  | 31021235 | 17916192 | 8897909  | 6984639  | 5625684  | 7607544  | 28930675 |
| 416836.6 | 216857.1 | 419601.7 | 472592.5 | 64896.5  | 757178.5 | 617558.1 | 602858.2 | 330094.6 | 84849.01 |
| 1006848  | 1646411  | 688410.6 | 1868587  | 3730755  | 72443.59 | 304351   | 204420.7 | 3931009  | 612238.5 |
| 2302950  | 2984382  | 75611.43 | 14484305 | 409189.9 | 701295.8 | 962887.5 | 880830.3 | 7631839  | 812947.4 |
| 74639036 | 45269549 | 19599772 | 19890894 | 62723406 | 2.14E+08 | 1.26E+08 | 97839484 | 12302843 | 42139955 |
| 4558748  | 2981276  | 441070   | 271339.5 | 1149206  | 9813748  | 7207847  | 6829673  | 732729.4 | 2072146  |
| 1990801  | 1032678  | 497202.9 | 356132   | 1352581  | 3205713  | 3259896  | 2727870  | 541255.6 | 1313876  |
| 6241503  | 7460530  | 922207.6 | 1065810  | 1782670  | 5643762  | 14852548 | 3014966  | 1474343  | 1683074  |
| 355421.6 | 274900.3 | 37764.24 | 100245.6 | 264978.5 | 683598.2 | 1067909  | 633844.6 | 75624.95 | 223666.9 |
| 2369486  | 1308443  | 407309.7 | 269184.8 | 880290.5 | 5787406  | 2552038  | 2488606  | 450336.7 | 1795246  |
| 5118859  | 3554276  | 819223.1 | 671381.4 | 2635342  | 7857857  | 9632351  | 7238126  | 399466.6 | 2345076  |
| 553435.2 | 565914.7 | 43960.88 | 12774.59 | 103257.8 | 1458024  | 543192.3 | 1201590  | 29155.35 | 96263.33 |
| 339517.2 | 229876.4 | 58253.17 | 26062.81 | 172083.2 | 652495.8 | 522994.8 | 512550.5 | 438725   | 45578.75 |
| 187370   | 150052   | 0        | 0        | 16754.46 | 365505.4 | 850187   | 242133.3 | 104327.1 | 413930.6 |
| 475546.7 | 524367   | 10408.1  | 12196.46 | 36278.95 | 384709.6 | 1365930  | 836566.9 | 20931.87 | 188839.3 |
| 6462365  | 4444222  | 656681.5 | 355213   | 2582649  | 10599015 | 12784153 | 10578684 | 493849.7 | 4502194  |
| 627020.7 | 655604.5 | 0        | 43217.41 | 1678391  | 421925.4 | 1787891  | 1785276  | 163786.7 | 361110   |
| 1395948  | 1245295  | 32798.02 | 18490.68 | 95748.84 | 2559789  | 2879671  | 2483276  | 189143.3 | 846578.1 |
| 236879.1 | 332457.4 | 2030.222 | 0        | 90489.94 | 441455   | 364614.7 | 63689.14 | 45922.39 | 89124.28 |
| 1981789  | 1393518  | 155585.8 | 131900.9 | 561836.6 | 4818007  | 2457014  | 2693335  | 266706.3 | 814391   |
| 1116597  | 769084.8 | 240092.3 | 227962.2 | 858616   | 2987425  | 2346921  | 1518126  | 119610.4 | 610249.1 |
| 266917.6 | 206498.9 | 34700.19 | 36509.18 | 41741.8  | 205739.5 | 747260.9 | 435800.2 | 24499.69 | 62880.08 |
| 1225656  | 2311420  | 22300.12 | 87186.31 | 48871.62 | 209225.1 | 3719054  | 5350435  | 51304.7  | 85245.73 |
| 18902060 | 17713369 | 18714807 | 10964405 | 25293541 | 5271060  | 52682476 | 46460803 | 137889   | 11649052 |
| 969889.6 | 1002185  | 10378.35 | 0        | 98612.25 | 735508.4 | 2864438  | 668241.8 | 136007.7 | 878684.8 |
| 2367053  | 1111968  | 1372743  | 1874602  | 2058483  | 4281462  | 3429664  | 3941330  | 1093023  | 1631707  |
| 715107.7 | 457613.9 | 129534   | 120695.8 | 258011.3 | 863031.9 | 1630550  | 1006141  | 128927.3 | 443122.5 |
| 2665549  | 2333349  | 2432.819 | 2526.208 | 16634.95 | 4830607  | 5787025  | 4696115  | 659634.1 | 2062562  |
| 550759.6 | 370233.2 | 621101.6 | 100915.1 | 383674.5 | 1259447  | 800280.5 | 688333.9 | 296158.6 | 199164.1 |
| 1472861  | 994367.9 | 591897.8 | 1069511  | 640934.4 | 2467119  | 3833316  | 2907765  | 562984.4 | 625372   |
| 1445774  | 1278138  | 599984   | 180688.2 | 959993.3 | 5832056  | 1556946  | 3237849  | 80163.16 | 421111.5 |
| 7098315  | 4295566  | 3088075  | 117061.9 | 4486490  | 3364831  | 18400793 | 12215849 | 3050625  | 4578519  |
| 334264.2 | 278192.8 | 77495.71 | 89014.69 | 51619.09 | 113238.1 | 986890.3 | 569171.5 | 59653.82 | 251613   |
| 433388.9 | 379986.6 | 49411.39 | 84324.7  | 253151.7 | 1483901  | 814789.2 | 245788.6 | 109046.6 | 143252.6 |
| 715302.5 | 392495.4 | 266936.5 | 248021.4 | 603231.3 | 1759433  | 1253233  | 1151524  | 186544.4 | 479773.3 |
| 3262971  | 3578647  | 743088.7 | 1875130  | 1234965  | 3096799  | 6329043  | 1173873  | 469929.1 | 3996501  |
| 792840.6 | 748708.4 | 0        | 2427.621 | 215080.8 | 1478251  | 1496401  | 935852.9 | 5264.822 | 319436.2 |
| 1160397  | 503893.1 | 466397.3 | 649667.4 | 1455971  | 2473035  | 1434014  | 1656513  | 463144.9 | 819904.9 |
| 1210278  | 1062089  | 5834.052 | 0        | 43538.12 | 2121586  | 2670735  | 1416071  | 40386.86 | 290170.1 |

|          |          |          |          |          |          |          |          |          |          |
|----------|----------|----------|----------|----------|----------|----------|----------|----------|----------|
| 3493522  | 2184315  | 532511   | 505963.4 | 1032007  | 5964878  | 6710089  | 5358832  | 706199   | 2392594  |
| 330710.9 | 208888.4 | 40094.1  | 50089.78 | 121938.9 | 372666.9 | 795248.6 | 502629.3 | 24972.53 | 201088.2 |
| 292256.1 | 196807.4 | 52597.77 | 79577.42 | 244485.3 | 801550.9 | 554517.7 | 299324.9 | 30207.79 | 221789.1 |
| 462203.7 | 373989.3 | 39650.28 | 107091.3 | 120910.5 | 1390448  | 162024.7 | 516526.9 | 110588.4 | 404881.7 |
| 593342.3 | 341068.3 | 373830.8 | 393151.1 | 871766.3 | 691165.6 | 944283.8 | 795003.2 | 56788.87 | 530093.1 |
| 779704.9 | 413776.6 | 241206.1 | 448938.6 | 684530   | 937150.5 | 1188922  | 1230999  | 196231.6 | 608318.2 |
| 479569   | 330543.9 | 163547.4 | 182904.5 | 161596.5 | 1163280  | 1186227  | 545930.7 | 36587.7  | 253235.6 |
| 337734.9 | 236574.1 | 61326.88 | 68084.75 | 164179.1 | 414914.1 | 718941.4 | 510195.3 | 74024.14 | 162555.1 |
| 3282275  | 2259306  | 380307.8 | 717341.9 | 1721766  | 5979936  | 5165075  | 4552761  | 429771.2 | 1250002  |
| 135485.9 | 83679.16 | 40251.24 | 20660.34 | 69355.74 | 386760.3 | 294262.8 | 86716.59 | 46779.19 | 94592.43 |
| 1167548  | 814268   | 0        | 6249.228 | 41004.42 | 1677037  | 2989292  | 1225399  | 286014.8 | 846128.8 |
| 33353921 | 19766099 | 4936645  | 2911529  | 13519557 | 64322449 | 55927077 | 29188115 | 6553565  | 25304250 |
| 66639636 | 62765654 | 2981175  | 1912866  | 29612001 | 27811843 | 1.98E+08 | 85206766 | 220382.6 | 14616482 |
| 700148.6 | 466098.2 | 135350.9 | 130556.2 | 252685.5 | 1496488  | 944511.8 | 1184113  | 85831.14 | 344324.3 |
| 474294.8 | 293336.5 | 122885.4 | 144414.4 | 252851.7 | 1631950  | 721584.7 | 253379.3 | 551173.4 | 138218.9 |
| 94648.08 | 81113.82 | 0        | 0        | 52658.96 | 190018.7 | 146925.4 | 126389   | 6287.878 | 8982.09  |
| 339612.3 | 162491.4 | 94019.54 | 61744.51 | 194016.1 | 660787.4 | 470528.6 | 524430.6 | 118273.5 | 231874.2 |
| 231799.8 | 151220   | 22332.49 | 8869.613 | 69149.18 | 412028.7 | 457140.5 | 228528.7 | 51022.37 | 143853.6 |
| 6942439  | 4677266  | 854598.5 | 1120035  | 4376670  | 12111704 | 11214417 | 10165487 | 719201.6 | 3085194  |
| 6318517  | 2733744  | 2780791  | 9096224  | 7925233  | 5077679  | 4036245  | 3827078  | 7562739  | 10474874 |
| 458319.9 | 273334.8 | 106167.6 | 69094.18 | 343356.6 | 1317963  | 886391.7 | 509560.9 | 111313.1 | 247356.3 |
| 42225430 | 26313876 | 10921809 | 10992407 | 33595441 | 1.18E+08 | 75753100 | 55014078 | 6339759  | 23003918 |
| 464943.6 | 307066   | 52382.91 | 36521.2  | 170566.6 | 900770.8 | 796665.9 | 658130.1 | 52720.54 | 359932.7 |
| 1738439  | 1463043  | 112273.8 | 48956.46 | 133887.2 | 586868.1 | 5766430  | 2071525  | 493210.3 | 1898390  |
| 1125960  | 792421.8 | 106026.4 | 80720.3  | 278815.5 | 2580188  | 1617402  | 1719909  | 81612.84 | 645457.8 |
| 215365.4 | 232015.5 | 0        | 0        | 24975.06 | 285931.4 | 533902.8 | 486116.3 | 46335.53 | 82608.7  |
| 2014190  | 1102248  | 978189.6 | 822354.7 | 2875025  | 2286274  | 2120128  | 1516804  | 1219998  | 1491268  |
| 168503.2 | 108739.6 | 34612.7  | 9416.671 | 152775.3 | 362901.5 | 439346.4 | 211234.6 | 0        | 124374.2 |
| 390645.2 | 333669.4 | 60901.69 | 33606.63 | 150173.5 | 749992.1 | 627024   | 864452.5 | 15719.41 | 232559.5 |
| 302212.2 | 168848.2 | 6416.693 | 8836.298 | 21536.43 | 524428   | 687806.1 | 401270.6 | 200382.1 | 341595.9 |
| 2269792  | 1529936  | 228017.6 | 114875.7 | 635041.7 | 5613656  | 2787822  | 3034072  | 291674.5 | 1045239  |
| 207812.4 | 137971.6 | 45978.19 | 10740.39 | 70731.09 | 335173.7 | 414750   | 239973.1 | 7763.646 | 142950.1 |
| 4871192  | 3327646  | 1047027  | 489842.5 | 2088956  | 16298089 | 9853346  | 5093718  | 572382.1 | 2587316  |
| 2331855  | 2861240  | 5958.086 | 0        | 149824.6 | 1082417  | 7420967  | 2206930  | 76856.12 | 830210.8 |
| 278606.3 | 198156.1 | 6878.325 | 0        | 61951.74 | 747512.3 | 313493.5 | 412622.8 | 26582.63 | 100481.7 |
| 866607   | 1012117  | 232807.4 | 1185172  | 1420633  | 313342.9 | 368473.8 | 2628587  | 224020.7 | 223307.5 |
| 9112288  | 11398729 | 82561.2  | 29543.74 | 477620.7 | 11306945 | 23031014 | 28146894 | 935538.2 | 4657806  |
| 446206.5 | 347875.5 | 385024.8 | 242510.9 | 525323.3 | 405512.1 | 985710.1 | 850734.3 | 98437.23 | 294937.9 |
| 10252247 | 6510450  | 851351.5 | 569636.7 | 2731265  | 24247215 | 14257801 | 13378270 | 1551726  | 5263534  |
| 282427.5 | 161232   | 170958   | 321899.7 | 341367.8 | 272240.7 | 179488.2 | 500293.1 | 188350.2 | 224901.2 |
| 414097.3 | 350487.2 | 41410.65 | 2391.687 | 347879.3 | 224343.1 | 1068295  | 1024905  | 154477.2 | 229308.2 |
| 177459.6 | 88420.7  | 167882.7 | 211983.6 | 154403.1 | 248032.4 | 172861.5 | 288502.8 | 55515.37 | 209375.7 |
| 3387894  | 2186718  | 297272.3 | 195836.4 | 882714.1 | 6874356  | 5940766  | 5320145  | 485927.8 | 1734185  |
| 309791   | 106021.8 | 273349.9 | 339929.1 | 178592.2 | 453957.3 | 195877.2 | 409713.3 | 265710.2 | 201750.2 |
| 22202163 | 14468198 | 9242244  | 1266061  | 12426456 | 11448429 | 58012909 | 39879905 | 8170097  | 12858123 |
| 186287.4 | 266693.6 | 132257.3 | 166938.5 | 693464.4 | 103492.9 | 90894.58 | 652959   | 5291.339 | 64136.95 |
| 80897.77 | 48082.97 | 13125.42 | 17296.28 | 8138.321 | 144614.8 | 158670.8 | 115241.3 | 0        | 81053.31 |

|          |          |          |          |          |          |          |          |          |          |
|----------|----------|----------|----------|----------|----------|----------|----------|----------|----------|
| 210030.6 | 335913.9 | 61885.91 | 63453.65 | 203663.4 | 327436.8 | 144108.2 | 121098   | 18959.47 | 81312.59 |
| 684809.4 | 433933.3 | 0        | 4225.526 | 0        | 34125.79 | 2534701  | 1305406  | 294575.1 | 399195.2 |
| 118961.6 | 90527.82 | 10001.47 | 18613.21 | 36941.5  | 363627   | 301119.9 | 108676   | 5938.445 | 91133.77 |
| 147465.8 | 70376.63 | 17600.05 | 10603.89 | 19695.19 | 413844.4 | 144563.9 | 253865.7 | 60161.67 | 121661.1 |
| 4063328  | 2393694  | 619340.4 | 583209.7 | 2016500  | 3703821  | 10164592 | 5081919  | 246143   | 4084543  |
| 56990278 | 35184137 | 11018648 | 4378187  | 22729315 | 1.11E+08 | 93685292 | 1.01E+08 | 11315457 | 34998730 |
| 158067.9 | 72421.67 | 47512.68 | 25082.65 | 18702.06 | 247050.6 | 337455   | 225763.3 | 64623.06 | 199487.4 |
| 2321751  | 1812996  | 106367.3 | 37079.44 | 675978.6 | 3233364  | 5485104  | 3648409  | 425803.9 | 1410696  |
| 1615813  | 1151464  | 358386.6 | 573364.7 | 1477780  | 4211379  | 2833823  | 2175223  | 126988.6 | 718423   |
| 2163486  | 1403737  | 165069.7 | 74786.35 | 537737.3 | 5297892  | 2889724  | 2857770  | 262881.4 | 1120060  |
| 4575276  | 3844441  | 166236.9 | 148508.3 | 273655.9 | 7823841  | 10175868 | 7989276  | 869733.2 | 2819423  |
| 26494909 | 17376416 | 4341747  | 1698308  | 10375372 | 54297500 | 41418422 | 46848921 | 4400874  | 14505871 |
| 676973.8 | 809662.3 | 44901.39 | 91151.85 | 93200.66 | 146533.8 | 2164028  | 848798.3 | 127968.3 | 83094.88 |
| 140408.4 | 133344.1 | 43410.77 | 17430.33 | 59922.06 | 112540.2 | 340692.3 | 189693.6 | 14812.28 | 63162.76 |
| 13716898 | 17662859 | 0        | 0        | 321124.4 | 3450832  | 46342082 | 28603446 | 0        | 1707753  |
| 276133.8 | 244323.5 | 27721.6  | 2970.527 | 84481.55 | 514584.2 | 506434.1 | 244664.4 | 35909.35 | 103208.6 |
| 609565.2 | 1087642  | 0        | 0        | 0        | 214614.5 | 1895753  | 2537644  | 0        | 0        |
| 410340   | 280029.1 | 98734.66 | 50370.89 | 484517.7 | 193723   | 913098.6 | 377794.3 | 69119.48 | 309707.8 |
| 636173.5 | 390135.1 | 71980.92 | 86950.42 | 267522.9 | 1029897  | 1256735  | 946338.8 | 120592.8 | 323475.9 |
| 332295.5 | 151378.1 | 250785.9 | 263041   | 161353.4 | 625637.5 | 532526.3 | 432657.4 | 178096.6 | 175044.7 |
| 1712560  | 984242.3 | 107423.3 | 102046.3 | 103520.7 | 4431748  | 5898568  | 2164911  | 947789.9 | 2679100  |
| 13328660 | 9158024  | 2471682  | 1425723  | 8186559  | 40510316 | 27507518 | 24246179 | 1321840  | 7775745  |
| 441936.7 | 301367.7 | 207146.2 | 285687.7 | 247383.3 | 897586.1 | 889531.7 | 474995.7 | 120422.2 | 201391.8 |
| 3008309  | 2590611  | 173477.1 | 121768.1 | 592047.6 | 1160666  | 19055254 | 7123848  | 72983.21 | 3164604  |
| 127096.7 | 114494.2 | 13917.58 | 11327.97 | 33022.32 | 490559.5 | 251479.4 | 257612.5 | 6917.409 | 39825.14 |
| 35336554 | 45451031 | 4571019  | 1830799  | 4797950  | 28434612 | 95859066 | 79339586 | 6744676  | 85367.84 |
| 777346.9 | 451727.3 | 139761.6 | 205615.4 | 856306.8 | 1952898  | 1344203  | 1044039  | 141882   | 465313.5 |
| 655294.1 | 915400.1 | 536407.2 | 373112.9 | 1742373  | 357078.1 | 1011819  | 2285808  | 124014.1 | 321324.8 |
| 222221.3 | 195367.4 | 21481.84 | 28552.69 | 19330.72 | 219464   | 1202535  | 535654.4 | 37134.91 | 131907.7 |
| 268430.7 | 197703.5 | 0        | 4749.809 | 25735.22 | 578767   | 1098009  | 124574.2 | 446082.7 | 179771.5 |
| 6743019  | 3701292  | 7626866  | 4969482  | 21084734 | 1379797  | 4527733  | 12335042 | 6575452  | 7921976  |
| 319236.5 | 295153.1 | 2537.107 | 2565.798 | 0        | 271533   | 969826.1 | 211218   | 81243.44 | 248063   |
| 116093   | 108262.3 | 3399.749 | 0        | 59272.11 | 174962.3 | 239390   | 101727.2 | 0        | 34743.3  |
| 260781.4 | 202473.7 | 85036.98 | 116091.3 | 137507.4 | 500223   | 284520.7 | 320136.4 | 35330.76 | 57930.98 |
| 887784.9 | 805418.9 | 0        | 13670.9  | 123815.6 | 916403.2 | 2478560  | 2078554  | 137289   | 500872.9 |
| 79444.97 | 51895.32 | 0        | 0        | 30393.48 | 44280.4  | 243690   | 157616.9 | 90856.89 | 68236.15 |
| 1040770  | 189395.5 | 843531   | 912929.7 | 960519.4 | 1408540  | 874672.1 | 1082713  | 837075.1 | 983017.9 |
| 12081854 | 9851125  | 283759.5 | 135182   | 861310.4 | 21908208 | 26133539 | 20292692 | 2449670  | 7937235  |
| 6388316  | 6149748  | 9629.377 | 0        | 355948.9 | 5333121  | 19234451 | 12491392 | 549335.8 | 5031021  |
| 208563.3 | 208539   | 87166.87 | 599899.2 | 283778.1 | 147609.3 | 124814.9 | 41966.03 | 141653.1 | 572150.5 |
| 115775.1 | 70465.42 | 10284.8  | 5418.981 | 65772.3  | 306817.2 | 307649   | 138847.7 | 29086.21 | 53474.71 |
| 23627126 | 31195500 | 5588726  | 40446769 | 24888665 | 5881022  | 17713519 | 79127830 | 6587803  | 7612313  |
| 1855111  | 926628.5 | 445222.3 | 1071121  | 1561918  | 1845122  | 3379610  | 1909139  | 819085.1 | 1109812  |
| 9913049  | 14770668 | 502418.4 | 91020.85 | 144566.4 | 2227292  | 32702279 | 34514725 | 196656.5 | 788489.2 |
| 1424892  | 1351405  | 1494517  | 1103476  | 3345937  | 591986.7 | 1742204  | 3544154  | 21437.63 | 1542446  |
| 1279989  | 828858.2 | 388474.3 | 421013.6 | 1052392  | 3224728  | 2330600  | 1471047  | 179594.6 | 679682.2 |
| 952205.7 | 1156714  | 321104.3 | 282024.3 | 359370.9 | 1003337  | 1881155  | 2987255  | 232879.9 | 249562.5 |

|          |          |          |          |          |          |          |          |          |          |
|----------|----------|----------|----------|----------|----------|----------|----------|----------|----------|
| 625857.7 | 514464.3 | 127437.6 | 133997.7 | 170908.7 | 578036.6 | 1575146  | 1126682  | 155050   | 352552   |
| 250343.2 | 133222.6 | 77940.99 | 66633.41 | 213111.5 | 745314.8 | 360177   | 193373   | 77426.97 | 244339.6 |
| 182199.9 | 159351.1 | 8495.371 | 2808.513 | 39593.25 | 389633.9 | 306620.4 | 83621.01 | 28297.95 | 122408.7 |
| 361146.8 | 286461.2 | 228848.8 | 93806.86 | 123377.4 | 318903   | 1484010  | 421016   | 63513.19 | 820857.9 |
| 316277.5 | 204846.4 | 88471.38 | 27807.2  | 157269.3 | 480817   | 606516.7 | 376217.6 | 30586.8  | 195139.4 |
| 5652600  | 5664610  | 30156.71 | 15645.49 | 194702.5 | 4955158  | 16863332 | 11734321 | 376685.9 | 4133941  |
| 515915.8 | 360817.6 | 23707.04 | 27233.36 | 87991.57 | 1187490  | 814885.8 | 704136.4 | 44034.54 | 241960.8 |
| 120830.1 | 116004.8 | 2869.294 | 0        | 8626.291 | 29763.69 | 417016.3 | 233034.7 | 40615.86 | 50779.92 |
| 318407.8 | 137253.5 | 284003.6 | 466194.4 | 332520.6 | 273239.1 | 342588.9 | 461408.5 | 198525.2 | 255724.7 |
| 61048.11 | 62750.58 | 9371.804 | 5520.242 | 13666.88 | 192811.5 | 158808.6 | 156074   | 0        | 8050.217 |
| 486414.8 | 355759.9 | 21843.13 | 4093.741 | 125801.5 | 1254394  | 593469.7 | 712030.7 | 45615.3  | 218612.3 |
| 1632876  | 1100025  | 9796.573 | 25261.69 | 6698.737 | 342171.6 | 5867001  | 2978579  | 143021.5 | 967834.5 |
| 3364594  | 2937480  | 213847.2 | 186870.3 | 240601.6 | 1075986  | 11271943 | 6784867  | 1376711  | 1187184  |
| 5512164  | 4966932  | 2332919  | 715942.2 | 3799723  | 21430691 | 5854373  | 12754067 | 379012.8 | 1676229  |
| 1342359  | 1387627  | 7134.077 | 0        | 108222.6 | 606429.1 | 4409007  | 1733761  | 25639.49 | 729662.8 |
| 227086.9 | 163165.8 | 19725.66 | 32897.3  | 252454.7 | 573692.4 | 455914.5 | 296197.7 | 0        | 119467.2 |
| 114500.8 | 79577.12 | 13673.63 | 3374.03  | 42337.47 | 323467.3 | 312833.2 | 113415   | 5077.991 | 81961.97 |
| 565547.6 | 380812.7 | 129030.6 | 36419.79 | 242362   | 2000392  | 1039652  | 456988.4 | 129275   | 315877.3 |
| 705074.5 | 671804.5 | 2507.269 | 0        | 42695.72 | 463469   | 2233158  | 1394631  | 29599.03 | 625346.6 |
| 1549595  | 1023968  | 130404.8 | 60417.13 | 349144.6 | 3763910  | 2157900  | 2007093  | 203887.9 | 742381.7 |
| 28325890 | 30585905 | 3137310  | 2533756  | 7433085  | 4168622  | 1.82E+08 | 74424842 | 12266.33 | 6545801  |
| 192674.8 | 71171.44 | 150972.2 | 255712.8 | 230577.1 | 218528.4 | 163740.4 | 196822.5 | 204198.8 | 277435.9 |
| 14289584 | 8789832  | 459505.3 | 317205.5 | 2746214  | 41130171 | 43077507 | 21674954 | 4017142  | 11899038 |
| 5720798  | 3930341  | 1068301  | 8807187  | 4397702  | 4866948  | 6244192  | 6300559  | 2313740  | 4992339  |
| 2452269  | 1793559  | 368847.9 | 351889.2 | 1225660  | 2559693  | 5825748  | 4959310  | 351616.5 | 1143756  |
| 304957.6 | 228375.1 | 67548.29 | 41094.06 | 120187.7 | 517494.6 | 552437.1 | 285317   | 40850.22 | 142178.1 |
| 477511.6 | 283196.8 | 184811.3 | 56274.24 | 185347.1 | 236636   | 1326522  | 780914.1 | 13153.66 | 477862.1 |
| 24678980 | 16649334 | 9169179  | 4481775  | 16334022 | 76508006 | 39634163 | 45037625 | 3430610  | 12265725 |
| 1076809  | 735883.1 | 73209.49 | 137492.3 | 367143   | 4626279  | 1570631  | 1361392  | 436939.2 | 338400.1 |
| 733511.2 | 879561.2 | 215651.9 | 212300.8 | 321696.3 | 1716061  | 2033560  | 417764.6 | 71516.98 | 291835.2 |
| 4297366  | 3391596  | 347586.8 | 147800.9 | 1480519  | 10084247 | 5798595  | 8501489  | 317279.3 | 1771117  |
| 278090.7 | 220882.3 | 48362.52 | 33870.59 | 181447.8 | 700753.9 | 695203.4 | 482085.9 | 15805.02 | 67350.94 |
| 200250.8 | 105248.7 | 41682.26 | 16096.66 | 110029.4 | 413796.8 | 286106   | 229874.7 | 40645.14 | 161574.8 |
| 2355781  | 1589753  | 413736.6 | 96637.93 | 755001.5 | 4198519  | 4528804  | 2679805  | 341099.5 | 1282306  |
| 3259691  | 2302026  | 29686.95 | 4920.434 | 197051.9 | 12695506 | 7567629  | 5882011  | 346245.9 | 1770184  |
| 421988.4 | 516022   | 28244.98 | 44335.41 | 136071.5 | 184504.6 | 1236552  | 130884.2 | 22559.71 | 164759.6 |
| 1288207  | 2463155  | 10151.67 | 10665.63 | 72791.28 | 3892063  | 4704301  | 5692601  | 242674.8 | 75030.4  |
| 3.13E+08 | 1.79E+08 | 58531758 | 32167055 | 1.18E+08 | 5.65E+08 | 5.75E+08 | 3.25E+08 | 67128440 | 2.25E+08 |
| 705269   | 621563.7 | 185010.8 | 283383.5 | 467482.5 | 1365028  | 710070.3 | 712480.6 | 39387.99 | 220669.2 |
| 362912.7 | 253442.8 | 120626.7 | 69923.07 | 356436.6 | 260479.1 | 760883.4 | 322972.6 | 35423.2  | 234710.5 |
| 836122.8 | 622732.6 | 7844.727 | 2507.224 | 43648.77 | 3318134  | 1898823  | 1586214  | 58867.22 | 416494.5 |
| 116751.2 | 150357.9 | 9012.941 | 7658.431 | 19565.95 | 113524.2 | 304293.4 | 112681.2 | 17319.45 | 71670.79 |
| 698308.7 | 653309.6 | 16130.06 | 2210.036 | 32440.08 | 1146126  | 1629654  | 1291315  | 135513.7 | 352437.8 |
| 1171282  | 825378.5 | 247257.1 | 64957.21 | 563131.5 | 3490567  | 2665832  | 2179240  | 65092.77 | 649213.9 |
| 441732   | 331370.2 | 130663.4 | 67717.9  | 194341.4 | 1733000  | 596316.8 | 600508.9 | 139289.8 | 39825.48 |
| 240904.7 | 148092.8 | 72105.61 | 64920.95 | 240569.2 | 699294.8 | 325545   | 398521.7 | 34494.48 | 370578.5 |
| 64221.49 | 47161.64 | 7989.746 | 49879.08 | 25688.78 | 205962.3 | 92508.69 | 100415.8 | 23046.62 | 25711.9  |

|          |          |          |          |          |          |          |          |          |          |
|----------|----------|----------|----------|----------|----------|----------|----------|----------|----------|
| 778181.3 | 816316.7 | 6394.832 | 0        | 23745.27 | 2582226  | 2315529  | 583717.8 | 0        | 146543.9 |
| 1818449  | 1786562  | 153499.8 | 20728.35 | 777659.1 | 1883629  | 4559575  | 1489641  | 13362.44 | 404636.9 |
| 29352939 | 40169932 | 3058267  | 1595298  | 3857123  | 24949548 | 79158167 | 99185189 | 47105.61 | 25933544 |
| 3752277  | 2382073  | 791142.6 | 602000   | 1817404  | 9573234  | 9427836  | 5428780  | 760041   | 2231942  |
| 9426541  | 6420291  | 3736225  | 416644.6 | 6037189  | 4383335  | 24908143 | 18162071 | 4305045  | 4292054  |
| 1732180  | 1408801  | 76883.51 | 51192.52 | 781776.5 | 821874.6 | 9921571  | 896072.2 | 575331   | 2361045  |
| 4778016  | 4945080  | 1657868  | 964642.2 | 5452555  | 190620.1 | 11235535 | 9984881  | 13673.84 | 2478504  |
| 2356325  | 1668973  | 199389.6 | 150519.8 | 727806.8 | 5296549  | 3541855  | 3818447  | 313312.9 | 1048248  |
| 260034.8 | 248467.2 | 0        | 0        | 4648.047 | 247566.7 | 775498   | 476828.3 | 18997.81 | 202035.9 |
| 646442.5 | 642114   | 75720.84 | 54312.76 | 44848.83 | 1844256  | 2002886  | 819392.6 | 8139.769 | 267823.5 |
| 3171350  | 4037929  | 91644.04 | 21795.3  | 507265.2 | 2999929  | 8687287  | 10109589 | 21374.32 | 2419290  |
| 210730.7 | 131850.5 | 49201.42 | 17756.76 | 159466.4 | 500326.5 | 506375   | 340550.5 | 25531.65 | 124264.6 |
| 209201.1 | 170810.4 | 15176.6  | 3247.435 | 36185.03 | 481579.1 | 329302.5 | 211269.5 | 10500.87 | 100844.3 |
| 153124.7 | 86196.27 | 27910.37 | 30212.59 | 92812    | 174771.1 | 338492.4 | 222882   | 25539.94 | 145679.5 |
| 1170686  | 890487.8 | 183289.3 | 52223.1  | 368286.7 | 1905059  | 2427100  | 2089294  | 261682.5 | 306077.9 |
| 124813.7 | 118425.1 | 34297.61 | 45385.91 | 112809.8 | 255906.3 | 283534.3 | 146757.6 | 9612.416 | 96479.49 |
| 67579.95 | 36185.48 | 0        | 101746.2 | 64246.81 | 135162.4 | 76980.82 | 43236.46 | 126717.2 | 74514.12 |
| 3216443  | 5016110  | 192855   | 3969647  | 884315.3 | 6087074  | 1280796  | 12092438 | 193297   | 888483.2 |
| 472230   | 525628.6 | 37663.66 | 22533.95 | 304840.9 | 806548.1 | 1777131  | 174168.4 | 10781.62 | 163879.3 |
| 244126.4 | 176725.4 | 62176.1  | 38131.61 | 117670.3 | 648066.2 | 581397.9 | 322420.2 | 7953.492 | 115055.7 |
| 529576.7 | 380618.9 | 87900.12 | 82294.5  | 193972.6 | 1112338  | 779835.5 | 696310   | 56193.57 | 191868.3 |
| 279279.9 | 290992.6 | 2226.889 | 3627.156 | 8101.572 | 356226.7 | 1489737  | 789062.4 | 54390.66 | 158656.6 |
| 3736253  | 2268799  | 633884.8 | 517594.9 | 1777707  | 4741282  | 8380551  | 5735071  | 517110   | 2302787  |
| 158626   | 107535   | 3748.874 | 17293.98 | 29001.31 | 299533.5 | 318154.9 | 202371.5 | 20474.7  | 72963.01 |
| 1108236  | 583678.4 | 301995.8 | 192096.4 | 902001.6 | 1951399  | 3079984  | 1117237  | 383949.5 | 745824.5 |
| 8162289  | 4787259  | 1397013  | 873210.2 | 3150696  | 28141033 | 15652285 | 11470748 | 1458427  | 4679595  |
| 117994.9 | 100174.5 | 0        | 7769.517 | 45748.85 | 454923.6 | 224328.8 | 75782.54 | 4813.387 | 87440.07 |
| 238246   | 173684.4 | 90496.19 | 124959.1 | 138692.5 | 602423.5 | 418163.5 | 364803.6 | 73327.55 | 60390.27 |
| 7799110  | 4987355  | 1432882  | 707000.6 | 3060193  | 15717583 | 12559672 | 13547830 | 1341991  | 4174084  |
| 243469.2 | 368289.2 | 0        | 0        | 0        | 486392.2 | 1130108  | 115739.7 | 0        | 116952   |
| 1070864  | 886386.9 | 201959.2 | 85995.42 | 412503   | 2914979  | 2839194  | 780417.5 | 148564.3 | 863050.5 |
| 12511948 | 18157518 | 120588   | 522203.3 | 1549961  | 8387504  | 36636315 | 44529230 | 185801.5 | 7416270  |
| 276586.3 | 209103.7 | 59002.57 | 87760.63 | 133785.2 | 662986.4 | 685228.5 | 211093.2 | 33720.21 | 168722.6 |
| 81280593 | 32775879 | 31507432 | 16983758 | 47342916 | 1.53E+08 | 1.14E+08 | 90188656 | 28867048 | 72161460 |
| 354271.4 | 213688.8 | 31559.53 | 42188.02 | 34462.86 | 677324.1 | 714723.3 | 487992.6 | 51507.96 | 231396   |
| 888975.7 | 502830.5 | 353097.9 | 249527.6 | 829183.4 | 446490.1 | 2002577  | 1056204  | 303727.5 | 649232.1 |
| 156565   | 128132.8 | 33010.25 | 29652.9  | 25426.64 | 284727.8 | 288199.7 | 128149.3 | 22766.36 | 56269.86 |
| 1022961  | 657836.1 | 286521.8 | 106808.8 | 639032   | 1382091  | 2034708  | 1167112  | 127482.4 | 585230.7 |
| 671260.5 | 588391   | 463568.1 | 360572   | 945016.5 | 262718.3 | 1896577  | 1659905  | 493752   | 270130   |
| 209296.3 | 128104.6 | 137433.9 | 207606.6 | 141617.2 | 57076.86 | 388592.6 | 365426.7 | 65541.4  | 101284.8 |
| 1089096  | 1071001  | 197612   | 11155.01 | 314091.4 | 1895332  | 2091403  | 2386275  | 0        | 80615.29 |
| 223286.6 | 198655   | 0        | 0        | 4662.404 | 305441.8 | 594246.6 | 366677.6 | 10482.08 | 194233.3 |
| 271072.1 | 311271.3 | 8482.486 | 0        | 69686.32 | 704485   | 297973.5 | 677598   | 5739.622 | 48905.25 |
| 1499060  | 1681105  | 102492.8 | 110166.9 | 267228.2 | 2081959  | 3488206  | 1019717  | 185315   | 1010868  |
| 82162.3  | 47869.64 | 6859.424 | 25840.02 | 53494.44 | 49708.83 | 213646   | 97664.69 | 8364.336 | 71446.67 |
| 840965.9 | 524717.8 | 176495.2 | 58251.38 | 401331.6 | 2865077  | 1545053  | 967586   | 209853.4 | 442649.9 |
| 3808786  | 2384325  | 410387   | 292181.3 | 1403720  | 6276932  | 7916369  | 5039777  | 569558.3 | 2168754  |

|          |          |          |          |          |          |          |          |          |          |
|----------|----------|----------|----------|----------|----------|----------|----------|----------|----------|
| 75645523 | 43674925 | 14088088 | 7353844  | 28423518 | 1.38E+08 | 1.4E+08  | 78526691 | 15557930 | 54279875 |
| 65011029 | 73107905 | 350667.5 | 642083.8 | 1427871  | 36849646 | 2.11E+08 | 97457749 | 126105.8 | 29057656 |
| 7922494  | 7368838  | 201711.5 | 39650.59 | 1755611  | 4729242  | 24745605 | 6754561  | 10883.21 | 1964036  |
| 694882.3 | 479820.4 | 280394.4 | 94996.4  | 425045.6 | 1150791  | 2140597  | 696870.6 | 124212.2 | 470154.5 |
| 1432254  | 705632.9 | 837866.7 | 704049.1 | 859019.1 | 2692449  | 2897140  | 1440952  | 478557   | 1286278  |
| 776266   | 563969.4 | 158905.1 | 182608   | 55055.34 | 1405769  | 1497086  | 1410407  | 81429.09 | 454153.1 |
| 48922577 | 55083831 | 2805986  | 3050203  | 16053712 | 6850384  | 3.1E+08  | 1.35E+08 | 0        | 9789907  |
| 176123.8 | 114294.5 | 209781.9 | 236300.7 | 170123.2 | 137238.8 | 39860.7  | 214346.9 | 72049.44 | 40319.82 |
| 853042.4 | 622285.1 | 165957.1 | 422850.8 | 409861.8 | 1571509  | 1152374  | 1036579  | 34308.73 | 379346.7 |
| 27535411 | 21643015 | 500795   | 319320.6 | 1832195  | 50938958 | 60516079 | 47411210 | 6506973  | 18707932 |
| 10816649 | 9365439  | 243899.8 | 99540.13 | 721495.2 | 21030229 | 22492104 | 18353484 | 2088090  | 6419090  |
| 87185.54 | 71858.1  | 3168.926 | 0        | 4626.638 | 24129.24 | 574391.8 | 148002.8 | 23482.16 | 22171.64 |
| 146543.7 | 105900.1 | 38084.65 | 49561.38 | 69537.85 | 245041.5 | 465367.8 | 85319.1  | 11089.95 | 142623.7 |
| 345753.1 | 223566.8 | 13141.43 | 8788.721 | 119479.5 | 518610.3 | 803138   | 564895.8 | 121989   | 352010.7 |
| 768524.2 | 125353.1 | 324586.1 | 398665.6 | 405210.3 | 1962951  | 1223974  | 610186.3 | 944497.4 | 695767.7 |
| 1130695  | 661147   | 281960.6 | 166028.5 | 395632.9 | 2215929  | 3673491  | 1701893  | 399317.7 | 522015.7 |
| 6428493  | 5918460  | 1029324  | 715609.8 | 8551179  | 587211   | 15640816 | 11104255 | 0        | 3642839  |
| 803469.5 | 537432.9 | 64639.27 | 76398.4  | 207314.9 | 1798636  | 1261972  | 1199314  | 81389.24 | 377356.8 |
| 6412069  | 5193431  | 133433.6 | 75758.04 | 230886.2 | 11740125 | 14328831 | 11523201 | 1258182  | 4250647  |
| 420328.5 | 417097.6 | 317555.6 | 506095.2 | 349473.6 | 603964.4 | 25131.59 | 786857.1 | 30134.7  | 98259.6  |
| 616683.2 | 665750.1 | 737663.6 | 684837.7 | 0        | 886519.4 | 1285566  | 1608088  | 0        | 729284.9 |
| 40158031 | 22394084 | 7591856  | 8770570  | 21451455 | 63614640 | 74942261 | 65291859 | 8340200  | 31195076 |
| 406083.8 | 265884.9 | 67857.4  | 22936.2  | 169647.8 | 653523.3 | 831238.5 | 457560.3 | 56744.16 | 227029.4 |
| 3517044  | 2331227  | 840720   | 768892.7 | 2535311  | 10346680 | 6066973  | 4165172  | 475413.3 | 1795428  |
| 206549.5 | 196300.5 | 55573.13 | 586727.3 | 358486.4 | 117625.5 | 101170.5 | 83793.13 | 125240.4 | 554930.6 |
| 7702758  | 4563239  | 1298397  | 1212179  | 2859234  | 15549892 | 12447039 | 11093389 | 1502411  | 4544781  |
| 512860.7 | 359876.4 | 36058.79 | 8421.349 | 118866.8 | 1009063  | 995264.7 | 635455   | 29879.57 | 270266.4 |
| 2858685  | 2087473  | 59608.25 | 77807.6  | 3836493  | 2556223  | 10865743 | 4296934  | 39459.97 | 2332326  |
| 90230066 | 66814317 | 21301134 | 34437338 | 73477780 | 2.73E+08 | 1.26E+08 | 97000706 | 14966986 | 44000621 |
| 5617488  | 3472495  | 982768.8 | 2444454  | 2817089  | 7911129  | 10586151 | 6761573  | 1143534  | 3661816  |
| 1659260  | 915391.9 | 1509305  | 1911805  | 1620846  | 1780394  | 838862.4 | 1959096  | 1074146  | 601915.3 |
| 8723300  | 5207635  | 295926.5 | 183323.1 | 1275300  | 19112941 | 16012763 | 11953609 | 1301380  | 5170960  |
| 2735598  | 2522765  | 621149.4 | 164492.3 | 1610340  | 5542367  | 3624692  | 4664084  | 165431.9 | 450636.6 |
| 262477.7 | 116365.9 | 135533.1 | 177955.8 | 157684.4 | 512400.2 | 464249.1 | 154604.9 | 168755.6 | 215186.8 |
| 235362.6 | 180668.4 | 68357.99 | 62858.01 | 216552.4 | 727202.5 | 305731.3 | 272175.9 | 18494.13 | 88530.31 |
| 830112   | 499986.4 | 123130.5 | 20279.07 | 307079.3 | 2365040  | 2129357  | 565486.1 | 263328   | 750515.4 |
| 1154191  | 829594.4 | 143955.1 | 54836.8  | 165739   | 2329490  | 2183838  | 1179597  | 111140.7 | 629014.3 |
| 236172.5 | 189295.2 | 227342   | 173638.2 | 170985.6 | 260604.8 | 225147.8 | 94042.67 | 556200.2 | 110202.1 |
| 72285.44 | 61576.96 | 18263.11 | 17414.99 | 4534.684 | 183797.9 | 211475.8 | 113802.2 | 4855.267 | 31313.74 |
| 253373.3 | 338724.5 | 25296.63 | 5458.84  | 149513.5 | 647973.2 | 173431.8 | 255731.5 | 35618.52 | 45097.28 |
| 118916.1 | 82724.65 | 61989.96 | 58983.99 | 27545.16 | 286945.4 | 250245.9 | 94872.1  | 32727.96 | 98368.82 |
| 1045675  | 632831.9 | 340696.8 | 263561.2 | 1548871  | 646401.2 | 1836615  | 1398722  | 148904.4 | 743840.8 |
| 6562006  | 9028322  | 222543.6 | 844814.9 | 185650.6 | 9325129  | 32524159 | 3144165  | 299611.7 | 562412.2 |
| 210592.7 | 189500.8 | 47550.03 | 57256.89 | 102939.8 | 555540.7 | 113172.4 | 82578.44 | 0        | 151251.5 |
| 262647.3 | 90569.03 | 24923.5  | 27045.42 | 90417.83 | 236793.9 | 736571.2 | 383007.8 | 146480.8 | 219779.8 |
| 1376607  | 971240   | 254310.1 | 92771.5  | 910878.1 | 3771646  | 3064901  | 1075025  | 215836.7 | 834842.1 |
| 286363.8 | 165953.9 | 129436.7 | 34870.21 | 140327.2 | 197749.4 | 729344.6 | 223213.2 | 104132.1 | 366545.6 |

|          |          |          |          |          |          |          |          |          |          |
|----------|----------|----------|----------|----------|----------|----------|----------|----------|----------|
| 4154054  | 2456973  | 1006080  | 1085907  | 5977878  | 8760059  | 6572404  | 7651400  | 758851.4 | 3938562  |
| 4240824  | 4525366  | 29707.93 | 9414.86  | 0        | 2519266  | 13975857 | 9911821  | 74490.85 | 1739916  |
| 12678020 | 9296245  | 397866.9 | 269441.4 | 1867976  | 24295776 | 26461938 | 20532287 | 2944943  | 8297591  |
| 22379016 | 20998429 | 56297.3  | 43760.19 | 1032822  | 38279264 | 1.03E+08 | 25182528 | 4029600  | 19075965 |
| 761685.1 | 691801.2 | 164880.9 | 205001.9 | 190551.7 | 1861482  | 2131534  | 579115.7 | 123493.5 | 132311.7 |
| 3064126  | 1937444  | 587278.9 | 241704.1 | 1229202  | 5301457  | 5908162  | 3214213  | 579504   | 1711204  |
| 798195.6 | 997859.1 | 675477.2 | 1150177  | 777219.4 | 230722.9 | 498947.1 | 2557743  | 457396.8 | 190131.6 |
| 181142.7 | 153596.3 | 50389.76 | 64754.03 | 137975.9 | 565896.9 | 247177.5 | 418630   | 51709.47 | 73020.49 |
| 1464571  | 1382950  | 3954.665 | 2552.849 | 77136.35 | 1377647  | 4419217  | 2758377  | 156278.1 | 1153080  |
| 61343120 | 44585082 | 26974893 | 1.45E+08 | 88392978 | 47403403 | 38979518 | 31845551 | 40143600 | 1.4E+08  |
| 264330.6 | 115043.3 | 106089.2 | 297671.4 | 300856.2 | 443878.8 | 52854.22 | 224232.9 | 117528.7 | 337890.2 |
| 474759.7 | 358935.2 | 46751.73 | 65034.64 | 223854.5 | 1625478  | 888134.4 | 591038.6 | 3713.624 | 194800.6 |
| 11606459 | 7649162  | 2704506  | 2767976  | 10294951 | 30356843 | 20640988 | 15083672 | 1537596  | 5729059  |
| 59195.19 | 37002.99 | 39147.14 | 11982.87 | 88789.33 | 41112.97 | 84804.66 | 54868.4  | 0        | 100133.7 |
| 379385.7 | 220081.2 | 150682.3 | 120566.9 | 205625.5 | 884068.5 | 804300.3 | 373549.7 | 74562.75 | 269319.8 |
| 938928.1 | 566348.6 | 86228.72 | 53285.35 | 239450.6 | 2056161  | 1583726  | 1451797  | 169499.7 | 519755.6 |
| 519223.3 | 459884.7 | 155282.1 | 169098.3 | 382821.6 | 1746698  | 634091.6 | 309154.1 | 69988.25 | 303202.3 |
| 326647.3 | 268753.4 | 49630.55 | 26518.12 | 284115.2 | 954613.3 | 610749.5 | 189875.9 | 51232.52 | 198478.3 |
| 1781315  | 1122003  | 312387.9 | 318946.9 | 947785.1 | 2455045  | 3732405  | 2612529  | 250163   | 949082.2 |
| 437633.6 | 315547.6 | 31083.52 | 5907.219 | 202290.3 | 967717.7 | 659923.2 | 791136.8 | 45021.85 | 251422.3 |
| 1017904  | 1004953  | 5207.613 | 4035.397 | 19406.66 | 77906.81 | 3786343  | 1532698  | 255971.6 | 701868.3 |
| 348361.1 | 234052.1 | 124152.5 | 167184.5 | 231606.2 | 495227.8 | 539789.8 | 443275.1 | 54445.55 | 145987.3 |
| 16362723 | 14094866 | 403495.4 | 60218.59 | 622472.2 | 1017222  | 61027959 | 37790037 | 3369745  | 11661080 |
| 2079892  | 1795705  | 0        | 8685.665 | 168980.6 | 3816213  | 4635266  | 2821617  | 29610.11 | 374915.2 |
| 283937.5 | 272235.5 | 21184.84 | 39881.58 | 43274.03 | 326548.7 | 739413.4 | 155696.6 | 22315.63 | 198564.4 |
| 241691.4 | 149081.4 | 0        | 6329.056 | 0        | 528199.1 | 482438.3 | 354405.9 | 24861.35 | 146274.2 |
| 180896.7 | 119782.2 | 58252.13 | 119030   | 87846.93 | 336122.2 | 204133.2 | 227175.1 | 50123.65 | 54740.89 |
| 1535526  | 1093970  | 337901.6 | 192693   | 1088178  | 3690744  | 3616711  | 2685502  | 156788.7 | 652178.8 |
| 2762928  | 3872930  | 976815.2 | 297083.7 | 1279166  | 5372696  | 3214191  | 9649617  | 347062.2 | 1092454  |
| 803893.8 | 1186215  | 0        | 0        | 1174924  | 728290.1 | 1299668  | 0        | 0        | 0        |
| 206361.9 | 134220.1 | 50823.97 | 40547.15 | 114911   | 423883.1 | 273328.2 | 168322.9 | 13404.48 | 231558.7 |
| 2912277  | 2411552  | 1047815  | 755656.8 | 2200327  | 7436683  | 5408138  | 1392710  | 312737.2 | 1899251  |
| 9493389  | 14095140 | 1578946  | 1399163  | 5651235  | 2203601  | 52677894 | 34353374 | 6158576  | 284044.3 |
| 238977.3 | 188132.8 | 49310.39 | 38811.96 | 145839.2 | 789565.7 | 394997.6 | 175334.2 | 27845.2  | 125407.5 |
| 172394.5 | 175863.6 | 7194.108 | 10438.24 | 7483.748 | 455334.6 | 583680.8 | 229471.7 | 0        | 62179.65 |
| 1513713  | 1728500  | 402947.7 | 28485.1  | 601884.7 | 1113493  | 7628923  | 1497169  | 282991.1 | 543523.4 |
| 5135584  | 3760268  | 1765812  | 1607051  | 16310204 | 702468.6 | 578200.9 | 3367068  | 5892268  | 11389390 |
| 4722135  | 2898901  | 695167.4 | 639272.7 | 1443342  | 19656377 | 6469204  | 4830127  | 931647.8 | 2858302  |
| 1310977  | 723912   | 498404.3 | 405000.9 | 1080324  | 3666614  | 1829339  | 1388548  | 441665.5 | 766016.3 |
| 552816.4 | 363204.9 | 145951.7 | 78311.25 | 262893.4 | 929084.6 | 1001814  | 550225.9 | 81409.12 | 318772.5 |
| 854903.7 | 444069.2 | 252379.7 | 220264.5 | 431562   | 1141272  | 1745669  | 1020385  | 254547.5 | 704547.2 |
| 2805251  | 2783940  | 596278.3 | 426647.5 | 1243297  | 9013948  | 5581466  | 7512729  | 459644.4 | 1716819  |
| 1464309  | 986563   | 471960.6 | 601040.4 | 1257316  | 3140032  | 2806602  | 1835159  | 179672.9 | 666386.6 |
| 531177.4 | 345871.3 | 98075.51 | 134294.7 | 757822   | 982368.5 | 1026179  | 547520.7 | 134388   | 429586.4 |
| 102310.5 | 145434.8 | 2413.641 | 2986.079 | 6971.54  | 213307   | 429684.6 | 39942.47 | 0        | 6438.863 |
| 25186195 | 19239504 | 309886.8 | 352472.2 | 920962.3 | 6753657  | 90789447 | 54291085 | 7473290  | 19695420 |
| 1670274  | 1185859  | 99696.18 | 129924.2 | 2049984  | 1650835  | 3334502  | 2335621  | 0        | 1574845  |



|          |          |          |          |          |          |          |          |          |          |
|----------|----------|----------|----------|----------|----------|----------|----------|----------|----------|
| 499003   | 112596   | 395847.2 | 538053.4 | 542617.1 | 403989.1 | 532921.4 | 654204.6 | 386102.5 | 392781.7 |
| 222605.2 | 221681.4 | 0        | 3250.319 | 16209.58 | 579453.8 | 776098.3 | 296689.3 | 102217.8 | 133211.1 |
| 686831.4 | 875504   | 17650.02 | 2050.529 | 10651.79 | 130022.8 | 2443736  | 11201.97 | 1980236  | 1215010  |
| 3730051  | 4494647  | 256274.8 | 16622.12 | 0        | 1604568  | 23638492 | 10564698 | 14574.11 | 1809709  |
| 85137932 | 1.12E+08 | 8822364  | 5947059  | 11819811 | 69902800 | 2.4E+08  | 2.79E+08 | 293354.3 | 54595544 |
| 1369563  | 1046775  | 55210.68 | 170238.8 | 309460.4 | 1828290  | 3414840  | 2164269  | 232158.1 | 862300.7 |
| 1020791  | 557917.6 | 286711.8 | 130627.2 | 1016768  | 473885.4 | 2522354  | 1620624  | 363199.8 | 592976.7 |
| 77979019 | 1.01E+08 | 1908445  | 969333.5 | 5900817  | 41365653 | 2.52E+08 | 2.5E+08  | 0        | 51045087 |
| 1077859  | 709356.8 | 3032.523 | 8278.427 | 41634.01 | 587982.1 | 3694848  | 1321491  | 685349   | 1826065  |
| 274384.8 | 283673.6 | 0        | 3020.227 | 26846.3  | 98026.57 | 946769.6 | 534506.2 | 11797.33 | 184562   |
| 379084.3 | 338152.4 | 86880.54 | 101854.9 | 266613.1 | 465592.2 | 1343969  | 320030.2 | 61258.11 | 90367.9  |
| 228985.1 | 136269.8 | 71694.27 | 122992.6 | 175748.1 | 380840.7 | 284226.1 | 437378.5 | 99209.44 | 123098.2 |
| 78443.72 | 51095.49 | 22498.84 | 37238.01 | 32489.74 | 174836.6 | 182210.2 | 106863   | 5376.592 | 49515.71 |
| 289076.9 | 185677.4 | 6242.675 | 0        | 70067.99 | 855895.8 | 800692.5 | 390171.6 | 139504.2 | 109564.6 |
| 199272.5 | 236562.2 | 190555.4 | 189078.6 | 106395.7 | 237829.9 | 125268.1 | 94958.59 | 67346.54 | 79838.54 |
| 312920.9 | 327933.3 | 25926.47 | 13076.01 | 59152.62 | 741425.9 | 452136   | 316478.8 | 49066.55 | 65247.09 |
| 470879.3 | 278681.3 | 154251.2 | 195068.2 | 430864.1 | 1082373  | 778932.7 | 706090.2 | 87978.24 | 272685   |
| 8217177  | 9234406  | 5001490  | 1739199  | 14221647 | 693754.1 | 12818153 | 23250885 | 0        | 10536623 |
| 567763.5 | 564440.2 | 46214.35 | 40258.57 | 363299.5 | 1003334  | 951537.9 | 629600.3 | 56801.78 | 167422.1 |
| 237889   | 144328.2 | 201727.4 | 258315.8 | 189593.9 | 181715.2 | 468898.5 | 414767   | 174113.2 | 158190   |
| 353154   | 310937.3 | 170002.4 | 97200.74 | 184144.8 | 235192.8 | 826218.7 | 806616.4 | 96456.29 | 85446.24 |
| 735520.9 | 675463.4 | 15025.02 | 9391.864 | 195361.6 | 3896515  | 637462.5 | 1145808  | 36536.34 | 227136.7 |
| 412371.9 | 519325.2 | 81390.64 | 265201   | 129418.4 | 423735.3 | 808269.4 | 126970.4 | 30748.6  | 501332.7 |
| 237659.9 | 197904.5 | 116653.1 | 20403.37 | 200027   | 778720.5 | 282552.9 | 459021.6 | 12073.96 | 94148.17 |
| 2662238  | 1638899  | 461012.5 | 536898.3 | 912504.1 | 4551172  | 5169603  | 3228575  | 547902.1 | 1425851  |
| 148423.8 | 144406   | 3269.029 | 3874.12  | 10184.91 | 110846   | 468444.2 | 195912.8 | 0        | 36068.81 |
| 243653.8 | 264856.6 | 3689.419 | 3670.351 | 0        | 181062.7 | 778308.7 | 321007.9 | 0        | 228617   |
| 454622.9 | 304302.7 | 653708.2 | 866809.3 | 272336.7 | 360564.9 | 351342.4 | 883282.8 | 602805.1 | 401206.4 |
| 880978   | 617715   | 171466   | 98419.67 | 634880.1 | 2393428  | 1815534  | 915075.4 | 62474.28 | 545871.7 |
| 432535   | 312941.4 | 34804.84 | 16469.41 | 161572.3 | 730224.9 | 911990.5 | 650769.5 | 42147.09 | 229564.8 |
| 1.69E+08 | 1.21E+08 | 74090569 | 3.95E+08 | 2.4E+08  | 1.31E+08 | 1.08E+08 | 89141182 | 1.1E+08  | 3.83E+08 |
| 3677422  | 2440235  | 387407.2 | 228545.4 | 1354945  | 6093824  | 7802927  | 5363106  | 350984   | 2804842  |
| 17910370 | 14872762 | 6183490  | 2691290  | 12962945 | 3653281  | 49586198 | 40274255 | 506762.8 | 9924119  |
| 1097416  | 931462.3 | 196122.7 | 227771.9 | 230360.1 | 1493588  | 2521245  | 2639483  | 287134.8 | 439897.9 |
| 139755.9 | 79638.01 | 98168.27 | 67059.9  | 81656.54 | 316952.4 | 213116.4 | 108856   | 38146.75 | 111096.6 |
| 604484.3 | 869237.1 | 216462.4 | 316289.5 | 428165.6 | 1034437  | 476077   | 239050.4 | 0        | 532686.9 |
| 6103067  | 5215839  | 157462.2 | 312270   | 4521500  | 1678723  | 18401517 | 9008020  | 66901.78 | 1780272  |
| 937068.6 | 577326.3 | 157026.5 | 80964.49 | 888453.9 | 1316804  | 1707059  | 753864   | 50105.65 | 1095051  |
| 431779.4 | 473526.1 | 173121.8 | 335770.9 | 1128080  | 389005.8 | 482473   | 1237642  | 17029.7  | 376778.3 |
| 5824124  | 3892464  | 6518695  | 2751151  | 14229338 | 2057698  | 7186199  | 12271169 | 3755358  | 6725782  |
| 486168.3 | 406403.9 | 136815.7 | 223453.1 | 309761.1 | 942659.7 | 516672.2 | 912715.3 | 50450.59 | 218373.6 |
| 332142   | 314198.6 | 6941.1   | 2521.806 | 8378.512 | 27220.16 | 1244058  | 803922.2 | 108215   | 270542.9 |
| 358186.6 | 275327.4 | 27381.46 | 4186.516 | 112738.6 | 182890.7 | 1140488  | 803534.6 | 361850.7 | 183093.9 |
| 171826   | 123292.8 | 19913.67 | 10862.77 | 26837.73 | 345935.5 | 330968.8 | 170795   | 0        | 123771.2 |
| 302125.3 | 332584.6 | 82572.35 | 100597.8 | 121558.3 | 377947.8 | 594224.4 | 235763.6 | 59197.81 | 111212.3 |
| 4203980  | 4078241  | 135758.9 | 378500.5 | 10114251 | 3119430  | 11160219 | 11078755 | 142308   | 2972558  |
| 1902260  | 1307210  | 13791.84 | 22959.84 | 201739.9 | 5960280  | 1634628  | 2194536  | 234588   | 3362504  |

|          |          |          |          |          |          |          |          |          |          |
|----------|----------|----------|----------|----------|----------|----------|----------|----------|----------|
| 449030.1 | 311490.4 | 25364.29 | 18930.25 | 142608.8 | 736192.8 | 1002069  | 706524.9 | 20211.95 | 308990.4 |
| 1790777  | 1826436  | 0        | 0        | 62537.58 | 5684433  | 5243882  | 1351012  | 12429.65 | 445261.7 |
| 176640.7 | 130459.1 | 13751.04 | 26279.51 | 30042.62 | 409874.6 | 273985.4 | 80454.02 | 40314.42 | 134537.2 |
| 5771612  | 5068924  | 168223   | 185393.1 | 562930   | 10198392 | 13075086 | 7679736  | 113018.9 | 1335238  |
| 11415662 | 9122486  | 676308.8 | 597595.6 | 7962510  | 9391401  | 52226948 | 16647104 | 4314.493 | 17485483 |
| 3944062  | 2928940  | 287038.5 | 142221.2 | 1273075  | 13864050 | 8091659  | 5016935  | 360938   | 1378871  |
| 5890586  | 5147681  | 108807.5 | 65107.19 | 369932.8 | 11459094 | 12651860 | 10146639 | 1132803  | 3594682  |
| 3.14E+08 | 2.28E+08 | 75593872 | 1.23E+08 | 2.51E+08 | 9.24E+08 | 4.34E+08 | 3.42E+08 | 54493241 | 1.57E+08 |
| 20421956 | 8532870  | 7890308  | 4109146  | 12083328 | 39489189 | 28523024 | 22814475 | 6901808  | 17742562 |
| 149118.6 | 116788.4 | 55599.33 | 52065.38 | 97819.33 | 432485.8 | 222318.7 | 132380.8 | 25807.05 | 55695.37 |
| 470779.8 | 201355.7 | 219034.9 | 232432.9 | 304310.5 | 631207.3 | 1245675  | 722572.9 | 211966.7 | 364063.3 |
| 7197066  | 6113943  | 1271769  | 1760165  | 4458741  | 20186328 | 14276443 | 9087760  | 664081.8 | 2768213  |
| 3.97E+08 | 3.85E+08 | 3.48E+08 | 2.27E+08 | 9.34E+08 | 1.13E+08 | 6.54E+08 | 9.6E+08  | 1745596  | 6.1E+08  |
| 967972.9 | 862269.4 | 38276.65 | 17001.49 | 119109.6 | 1145479  | 4817382  | 2478751  | 451291.8 | 387416.4 |
| 852616.4 | 581094.5 | 56922.29 | 37238.98 | 240171.1 | 1894354  | 1435067  | 1498587  | 105353.3 | 388772.1 |
| 220895.7 | 175620.5 | 15041.96 | 46676.35 | 48988.41 | 251826.6 | 573915.7 | 135092.3 | 22687.51 | 219191.8 |
| 95850.73 | 60621.75 | 32168.5  | 44272.07 | 50405    | 151622.9 | 152031.8 | 85108.99 | 35759    | 94124.14 |
| 979977.4 | 760292   | 146884.3 | 82236.95 | 379775.6 | 1614026  | 2005872  | 1423847  | 17313.07 | 349824.5 |
| 1361521  | 925748.7 | 161888.7 | 42126.54 | 561672.6 | 2226435  | 2902345  | 2193535  | 109113.9 | 929646.9 |
| 3897304  | 4910323  | 10478.29 | 69652.79 | 1365871  | 4803241  | 18531780 | 11802297 | 208115.4 | 160122.6 |
| 236406.9 | 242066.2 | 26298.4  | 20947.92 | 131870.8 | 84955.93 | 703474.9 | 644623.7 | 116897.9 | 121473.8 |
| 5748002  | 5003019  | 79702.89 | 11735.39 | 911002.1 | 14188438 | 8908183  | 11791965 | 127179.3 | 1093373  |
| 4222936  | 2629551  | 453123.4 | 187450.2 | 1551875  | 8220068  | 7939779  | 4035878  | 733301.6 | 2940845  |
| 1553307  | 683651.1 | 425446.7 | 270217   | 932492.7 | 2993425  | 4234217  | 1961673  | 451335.9 | 1317326  |
| 85366.39 | 56722.91 | 20380.66 | 40044.16 | 57908.68 | 169520.1 | 194750.7 | 160062.5 | 9349.444 | 78680.58 |
| 172182   | 78388.95 | 141889.6 | 65788.83 | 125049.8 | 332047.4 | 273438.8 | 54041.39 | 133490.9 | 248404.3 |
| 527830.3 | 420986.1 | 183827.6 | 164072.8 | 275794.3 | 167675.4 | 1448767  | 1151403  | 104729.5 | 249686.2 |
| 1167123  | 999915.8 | 42671.8  | 76064.01 | 766631.2 | 888625.3 | 5503904  | 890120.8 | 437685.4 | 313632.2 |
| 112728.5 | 85325.91 | 19237.23 | 25748.71 | 47606.2  | 382094.7 | 190645.3 | 111179.8 | 10860.95 | 74850.49 |
| 101475.3 | 112263.6 | 0        | 0        | 0        | 0        | 699473.6 | 155722.8 | 0        | 18919.77 |
| 565591.4 | 407274.6 | 51902.93 | 13342.06 | 152442.8 | 1287581  | 918807.6 | 1053225  | 51613.26 | 247984.4 |
| 522095.5 | 544249.8 | 50714.47 | 25515.84 | 138557.3 | 1375019  | 574022.6 | 937758.8 | 48189.9  | 213393.2 |
| 2431790  | 610738.4 | 2044124  | 2446374  | 2353077  | 3286962  | 2462606  | 3166491  | 1923053  | 2293750  |
| 264143.3 | 185903.1 | 48832.52 | 20347.64 | 82440.87 | 586804.8 | 404077.7 | 185075.3 | 58171.06 | 170149.1 |
| 578786.5 | 738061.7 | 46163.48 | 62226.65 | 209935.1 | 245158.5 | 3226461  | 131173.7 | 98009.11 | 597737.5 |
| 272892.1 | 399562.4 | 74504.8  | 146216.9 | 751763   | 16299.65 | 91551.48 | 978320.3 | 0        | 138497.1 |
| 377368.4 | 114517.7 | 265720.1 | 416583.9 | 434686.6 | 373172.1 | 320444.6 | 457226.7 | 370824   | 189908.6 |
| 1326429  | 688336.7 | 441315.1 | 549525.5 | 802722   | 2211925  | 2011876  | 1864658  | 559367.2 | 910642.6 |
| 1376430  | 775736.5 | 624664.4 | 113222   | 222254.5 | 166131.4 | 4564354  | 2392404  | 1666388  | 946678.2 |
| 868142.1 | 554291.2 | 177744.8 | 46512.61 | 356042.9 | 1580963  | 1636275  | 1042927  | 149101.4 | 524931.4 |
| 626234.2 | 807115.1 | 218830.6 | 239832.5 | 853743.3 | 425796.1 | 894151.4 | 2065955  | 206255.3 | 205451.2 |
| 344375.9 | 289976.4 | 11487.9  | 3727.224 | 67852.38 | 323686.5 | 1783349  | 799314   | 15243.02 | 247797.6 |
| 374212.7 | 325315.8 | 53748.95 | 91623.38 | 194563.9 | 710666.3 | 572143.3 | 833142.8 | 35435.02 | 148753.7 |
| 305026.9 | 286266   | 2337.368 | 7752.926 | 15735.54 | 317585.2 | 908499.6 | 778652.8 | 67671.27 | 194295.3 |
| 505820.7 | 376454.5 | 159957.8 | 43125.39 | 319806.2 | 1526006  | 888883.7 | 373517.4 | 67837.03 | 296961.8 |
| 269425.4 | 114758.8 | 254499.7 | 299532.4 | 173889   | 246601.1 | 300875.4 | 99161.91 | 324738.5 | 214784.3 |
| 817144.6 | 572851   | 195451.4 | 166178.9 | 515738.9 | 1515052  | 1221981  | 1532949  | 106257   | 388423.9 |

|          |          |          |          |          |          |          |          |          |          |
|----------|----------|----------|----------|----------|----------|----------|----------|----------|----------|
| 209496.1 | 141964.4 | 53125.78 | 252401.6 | 270967.1 | 293128.6 | 275418.9 | 301809.2 | 77345.7  | 80643.38 |
| 22192368 | 24233614 | 23320840 | 13268393 | 26049407 | 5320456  | 61132278 | 59747234 | 513562   | 6300896  |
| 4.77E+09 | 9.49E+09 | 1.29E+08 | 57956367 | 51788461 | 4.58E+09 | 2.76E+10 | 2.17E+10 | 64185005 | 1618086  |
| 224671.3 | 155396.4 | 51391.02 | 91267.39 | 184787.2 | 605620.3 | 344599.4 | 426908.4 | 38482.03 | 118990.4 |
| 6161847  | 5444945  | 2481950  | 679423.8 | 4130574  | 22937190 | 6503215  | 13842817 | 319356.7 | 1807085  |
| 96693744 | 64318642 | 36021599 | 17627005 | 62249761 | 2.91E+08 | 1.5E+08  | 1.78E+08 | 15321952 | 49556250 |
| 124737.2 | 80750.13 | 12095.8  | 2718.187 | 32036.89 | 259724.1 | 232359.8 | 166903   | 11351.41 | 70002.03 |
| 12933328 | 12535415 | 667492.9 | 727734.6 | 15818831 | 10355645 | 50701654 | 26900952 | 3388955  | 5310367  |
| 169526.9 | 117871.1 | 38451.62 | 17609.92 | 105788.4 | 483084.1 | 335575.4 | 102778.4 | 44521.6  | 109292.2 |
| 3982404  | 3875317  | 1231012  | 510397.9 | 3020965  | 1914700  | 17913276 | 6997522  | 656656.2 | 2670949  |
| 20814592 | 11088991 | 4171144  | 1992668  | 8069837  | 37300280 | 40250709 | 22934348 | 4325965  | 16027505 |
| 99369.99 | 110945.6 | 36145.31 | 52540.33 | 77964.99 | 102306.1 | 159261.1 | 237141.9 | 15987.93 | 6009.139 |
| 1028034  | 1251925  | 93745.79 | 1833919  | 501513.4 | 1904739  | 1651900  | 3177304  | 54056.48 | 415805.7 |
| 119882   | 94930.97 | 9636.073 | 2494.398 | 20622.66 | 234586.4 | 244058.1 | 100691.2 | 0        | 66889.12 |
| 184885.4 | 119356.6 | 0        | 3164.303 | 0        | 0        | 724877.9 | 303696.9 | 95557.13 | 109488.7 |
| 216873.1 | 168061.9 | 56785.31 | 28328.97 | 100078.6 | 519296.3 | 554479.7 | 183619.3 | 20893.39 | 158646.8 |
| 1931731  | 2027617  | 30827.95 | 54705.64 | 197888.9 | 2882565  | 4833818  | 2472381  | 149752   | 553642.2 |
| 1851009  | 3073537  | 769919.2 | 1105576  | 4177865  | 921065.9 | 4286029  | 7324480  | 10095.03 | 801899.8 |
| 4045732  | 2812274  | 1933521  | 1278507  | 3892940  | 885347.8 | 9675693  | 7462307  | 45955.31 | 2640570  |
| 2149062  | 3392010  | 219825.4 | 96115.07 | 326534.6 | 1082621  | 12631830 | 289872.9 | 72844.46 | 229863.9 |
| 19163471 | 14976004 | 537506.8 | 229379   | 1573397  | 36341804 | 42580899 | 34695492 | 4281863  | 12567658 |
| 847239.8 | 845427.8 | 199696.6 | 198947.5 | 216922.1 | 153421   | 2686943  | 2259409  | 265435.9 | 695207.3 |
| 337801.2 | 347527.1 | 3029.771 | 40795.04 | 53634    | 144977.7 | 1118145  | 780019.2 | 43889.91 | 194157.9 |
| 471025.2 | 369746   | 38693.72 | 54621.68 | 40829.14 | 858969.1 | 1018985  | 888089.2 | 16253.41 | 274229.9 |
| 2026119  | 1441368  | 46352.09 | 60211.23 | 163931.6 | 4007100  | 4362735  | 3362043  | 451009.7 | 2039850  |
| 376881.4 | 194332   | 227100.5 | 295135.9 | 44079.02 | 681968.5 | 463557.4 | 569965.4 | 158285.2 | 176201.1 |
| 8868791  | 11729058 | 4231820  | 2263288  | 5812283  | 98014.35 | 23590638 | 29089493 | 3120.065 | 5239299  |
| 598626.9 | 691726.1 | 268252.5 | 877788.2 | 565063.7 | 330276.9 | 537993.2 | 335515.4 | 30615.49 | 684550.3 |
| 510045.9 | 323171.9 | 260688.7 | 266689.8 | 84698.28 | 828583.8 | 844451.1 | 357321   | 302159.6 | 294177.2 |
| 404145.8 | 352629.6 | 85187.05 | 77575.48 | 35408.11 | 998588.4 | 522099.1 | 761427.1 | 128733.9 | 211786.2 |
| 77055.8  | 60197.46 | 0        | 0        | 19655.23 | 136333   | 172752.9 | 159112.8 | 9073.494 | 78337.5  |
| 962208.3 | 739314.5 | 1427736  | 1696425  | 244924.6 | 325616.6 | 567247.2 | 2251797  | 915979.1 | 492205   |
| 552242.5 | 424518.9 | 10467.45 | 12481.33 | 22754.33 | 925459.9 | 2427393  | 884674.3 | 87061.64 | 242154.2 |
| 428162.8 | 268499.1 | 31425.53 | 48434.57 | 298465.5 | 127692.8 | 1300732  | 407029.8 | 37702.41 | 632442   |
| 272384.6 | 214565.3 | 2667.526 | 0        | 99836.46 | 650082.1 | 411150.6 | 373208   | 4012.29  | 82987.5  |
| 558969.7 | 370967.9 | 46480.35 | 17178.16 | 119508.3 | 1263057  | 964360.7 | 823592.4 | 81252.85 | 240601.8 |
| 658790.4 | 395685.3 | 348551.6 | 323537.3 | 523467.7 | 344462.2 | 1416613  | 840211.7 | 47427.9  | 598435.4 |
| 15735755 | 18219914 | 4135508  | 2818514  | 13128287 | 20489292 | 53209226 | 44557539 | 296452.5 | 10533756 |
| 67838.8  | 41394.62 | 11474.3  | 0        | 30492.66 | 113341.4 | 141787.7 | 111163.9 | 7835.658 | 61123.35 |
| 445231.2 | 436467   | 59254.31 | 45991    | 393915   | 781265   | 1328425  | 248120.1 | 31951.03 | 130614.8 |
| 160343.2 | 158178.3 | 17614.02 | 16165.14 | 56620.97 | 313668.7 | 278992.4 | 199032.1 | 19352.32 | 50983.78 |
| 4696355  | 3524409  | 0        | 0        | 3211187  | 6268934  | 18749615 | 9704948  | 346083   | 5652327  |
| 8186178  | 8305531  | 551405.7 | 347760.8 | 4030642  | 6642160  | 39689570 | 9837893  | 70714.88 | 1662385  |
| 5717811  | 4815056  | 30274.32 | 224902.2 | 7053739  | 7486908  | 18769487 | 13065830 | 158440.9 | 3965870  |
| 789970.9 | 464600.3 | 19076.71 | 10902.91 | 227447.2 | 558509.2 | 2496276  | 1200827  | 113449.8 | 620025.4 |
| 606989   | 405984.5 | 66805.32 | 63776.77 | 378653.2 | 584746.5 | 1539085  | 1124471  | 163895.8 | 479029.7 |
| 452277.1 | 271799.8 | 159755.5 | 240161.6 | 166730.7 | 1098671  | 883961.3 | 537775   | 163628.5 | 205951.7 |

|          |          |          |          |          |          |          |          |          |          |
|----------|----------|----------|----------|----------|----------|----------|----------|----------|----------|
| 8876278  | 7746082  | 4365032  | 2452324  | 6580253  | 2489295  | 22271121 | 18802772 | 367394.3 | 6376872  |
| 2451763  | 1703967  | 131965.6 | 92912.78 | 71603.65 | 213192.6 | 9294205  | 3837032  | 4144830  | 2785705  |
| 713542.7 | 454963.4 | 112277.8 | 153007.2 | 182748.6 | 390810.9 | 2180922  | 1101437  | 258104.2 | 736605.9 |
| 447281.2 | 544815.1 | 3360.562 | 2178.054 | 3508.382 | 239475   | 1522551  | 1394222  | 0        | 227911.2 |
| 2540845  | 1578796  | 369983.1 | 122181.2 | 737042   | 5094367  | 4773258  | 3603492  | 343975.4 | 1379483  |
| 2640933  | 1404591  | 822453.4 | 864435   | 1520837  | 6073486  | 5549577  | 3347198  | 638370.3 | 1710778  |
| 138130.1 | 98527.89 | 22926.59 | 5927.729 | 39688.89 | 400050.7 | 340027.7 | 159537.3 | 7391.86  | 78422.85 |
| 1013052  | 774265.7 | 60477.65 | 0        | 15060.1  | 32054.89 | 3913385  | 2060979  | 491075.8 | 1208912  |
| 220135.4 | 136740.2 | 21887.59 | 17878.59 | 44609.86 | 845490.8 | 383114.6 | 256453   | 31683.51 | 133532.5 |
| 1.51E+08 | 1.37E+08 | 1.3E+08  | 73703274 | 3.4E+08  | 48390972 | 2.61E+08 | 3.51E+08 | 1994753  | 2.23E+08 |
| 484943.2 | 451561.1 | 476696.5 | 600638.5 | 342928.8 | 1245696  | 95407.02 | 930147.9 | 112826.1 | 57786.43 |
| 1872364  | 1278857  | 255342.3 | 129439   | 648627.4 | 3333293  | 3806597  | 2844415  | 188049.7 | 1115354  |
| 1380266  | 1887677  | 581830.7 | 547866.7 | 2847723  | 621713.9 | 1144525  | 4679476  | 7172.764 | 412068.5 |
| 9012870  | 8112863  | 274620.6 | 36100.35 | 598811.6 | 1576949  | 33460055 | 21656269 | 1676476  | 5285855  |
| 201014.3 | 164409.4 | 2793.787 | 3808.632 | 0        | 234954.7 | 596889.6 | 238205.9 | 64418.24 | 266803.6 |
| 128485.3 | 112776   | 69725.15 | 50647.04 | 94364.45 | 380114.6 | 142057.7 | 158704.8 | 23682.96 | 51395.96 |
| 9991358  | 6404403  | 1956173  | 676660.1 | 3983744  | 20260347 | 17049990 | 18352901 | 1858557  | 5982832  |
| 10277641 | 8334738  | 218285.6 | 128118.9 | 729013.8 | 18702928 | 23914744 | 18817988 | 2093957  | 6525941  |
| 681677.7 | 530665.9 | 10442.84 | 10009.07 | 12189.34 | 1044129  | 3124734  | 1129079  | 51496.01 | 383898.5 |
| 2079981  | 1874121  | 63795.24 | 64900.5  | 205076.6 | 3901251  | 4584352  | 2865678  | 14739.75 | 388964.5 |
| 1.03E+08 | 44142474 | 40258247 | 22376036 | 64747670 | 2.06E+08 | 1.35E+08 | 1.07E+08 | 35796497 | 89324586 |
| 1067961  | 1221495  | 103723.2 | 16107.03 | 471445.4 | 2757801  | 1102811  | 1224808  | 286016.1 | 143662.4 |
| 755549   | 787526.7 | 4197.187 | 6471.798 | 71280.35 | 1165779  | 1904829  | 1081682  | 53355.55 | 159152.1 |
| 6013892  | 5778062  | 1727258  | 1067734  | 4536783  | 17353744 | 10147491 | 5764910  | 615394.1 | 1853159  |
| 91257.93 | 52132.32 | 12956.73 | 9706.53  | 44021.94 | 176821.7 | 283903.7 | 101989.8 | 16020.65 | 64378.29 |
| 379878.7 | 303749.4 | 101695.8 | 70881.29 | 262220.2 | 961969.6 | 773655.3 | 459554.5 | 11076.64 | 129931.9 |
| 819189.5 | 629162.8 | 465333   | 76473.28 | 605661.1 | 1306974  | 2198810  | 1102400  | 180378.7 | 645560   |
| 90033.52 | 63350.85 | 5694.575 | 2148.411 | 15294.57 | 194817.6 | 316116.5 | 147679.3 | 0        | 48737.24 |
| 721921.9 | 648709.3 | 3700.524 | 12310.1  | 488709.4 | 245198.8 | 2250491  | 1127839  | 0        | 201074.8 |
| 82049.57 | 76826.33 | 5130.657 | 9211.84  | 6756.272 | 199711   | 126998.7 | 86700.34 | 0        | 39838.29 |
| 146839   | 113481.1 | 3335.333 | 0        | 28410.22 | 9111.118 | 550328.6 | 327096.3 | 105667.7 | 137007.8 |
| 381944.8 | 309259.4 | 26105.3  | 6176.305 | 149704   | 816510.5 | 653171   | 412532.6 | 91600.37 | 385233.6 |
| 521337.6 | 1016458  | 12226.1  | 2697.192 | 29972.37 | 1514722  | 1760737  | 2338954  | 79952.69 | 21022.52 |
| 1750465  | 1091780  | 278873.5 | 100845.3 | 637923.8 | 3083694  | 3597791  | 2304561  | 322867.2 | 1077735  |
| 1197225  | 753521.6 | 263272.6 | 389564.1 | 551825.7 | 2839257  | 2745018  | 1765344  | 166941.1 | 829885.3 |
| 39782458 | 38956755 | 1140349  | 891505.2 | 28752997 | 22109753 | 1.14E+08 | 27655102 | 2239086  | 7668534  |
| 391820.9 | 250214.1 | 23815.06 | 10204.27 | 75431.57 | 824655.3 | 767514.7 | 436086.1 | 44328.54 | 239436.8 |
| 2580706  | 3165547  | 1322486  | 6249925  | 869740.7 | 1235241  | 1167655  | 2714736  | 348235.7 | 1480371  |
| 891262.6 | 902291.4 | 5747.626 | 7666.62  | 46013.62 | 721123.3 | 2870169  | 2084829  | 80359.64 | 542665.3 |
| 655191.8 | 422858.7 | 9089.107 | 0        | 86991.94 | 1508836  | 1220843  | 878625.8 | 57846.84 | 380341.9 |
| 280803.5 | 269264.2 | 5412.137 | 0        | 24751.64 | 1098768  | 570821.3 | 629531.5 | 52716.82 | 146478.8 |
| 254339.8 | 236371.9 | 0        | 0        | 28456    | 225999.2 | 798193.1 | 393114.1 | 35915.61 | 217116   |
| 373606.1 | 265552.5 | 71955.38 | 56225.12 | 263776.2 | 914088.8 | 821216.8 | 315165.1 | 48833.87 | 228673.8 |
| 1132304  | 701913.7 | 814010.5 | 553750   | 2633171  | 369358.6 | 1923502  | 2378539  | 909308.4 | 764965.7 |
| 193320.3 | 133269.6 | 94720.23 | 117117   | 158688.3 | 304419   | 388195   | 365083.1 | 49587.94 | 146074.5 |
| 1202005  | 995066   | 13512.96 | 0        | 30058.94 | 472411.9 | 7289596  | 2728913  | 66727.95 | 649712.1 |
| 1465875  | 1353151  | 111204.1 | 33041.04 | 377253.4 | 4537413  | 1048494  | 1192464  | 100594.4 | 561372.9 |

|          |          |          |          |          |          |          |          |          |          |
|----------|----------|----------|----------|----------|----------|----------|----------|----------|----------|
| 151738.3 | 127489.9 | 16723.56 | 24640.54 | 85927.17 | 445895.9 | 306114.4 | 141411.7 | 5990.888 | 97241.01 |
| 8454807  | 1472112  | 1603308  | 1383154  | 4149391  | 20061195 | 10744001 | 7203998  | 10727381 | 8113542  |
| 5642746  | 4279037  | 924689.3 | 225849.7 | 991106.2 | 10252606 | 12067519 | 11466179 | 44160.46 | 3270003  |
| 1353942  | 867907   | 195680   | 225956.8 | 607311.7 | 4595469  | 2242205  | 1786619  | 181595.5 | 780236.3 |
| 949495.9 | 1023070  | 136536.1 | 201353.7 | 734645.8 | 739612.8 | 3918924  | 291934.2 | 143543.9 | 668749.6 |
| 108562.5 | 88129.69 | 18428.47 | 8081.611 | 32795.72 | 461160.2 | 133426.3 | 54833.65 | 30235.63 | 65832.24 |
| 441392.2 | 422918.5 | 28566.25 | 34908.25 | 33990.63 | 807699.2 | 972158.2 | 905297.5 | 31429.44 | 240572.3 |
| 852996.6 | 1114517  | 313236.9 | 446199.3 | 161100.6 | 1739021  | 933392.6 | 455534.8 | 192980.6 | 134054.2 |
| 7294963  | 4763978  | 1283942  | 426210.9 | 2802749  | 15033383 | 12585237 | 13332796 | 1159520  | 4117692  |
| 2907070  | 2950276  | 261212.1 | 398736.4 | 530370.4 | 2666685  | 8329592  | 1919968  | 231731.8 | 3812943  |
| 5282773  | 7084621  | 241162.2 | 560574   | 656336.9 | 31297234 | 1699120  | 17427614 | 207464.1 | 5595384  |
| 1110997  | 774757.2 | 163060.4 | 69809.94 | 303770.4 | 2140791  | 2184282  | 1053122  | 161811.1 | 589981.7 |
| 99639.67 | 60663.78 | 7281.33  | 18871.69 | 46592.92 | 203923.2 | 295956.3 | 172704.1 | 4362.84  | 99080.91 |
| 164231.5 | 131116.2 | 9920.828 | 5324.986 | 34159.14 | 380852.3 | 277485.7 | 327179.6 | 10495.4  | 56914.92 |
| 343900.5 | 374099.5 | 2672.136 | 3203.829 | 3320.974 | 567533.8 | 859032.6 | 578361.5 | 20956.1  | 194438.7 |
| 1320476  | 2150245  | 520509   | 536873.9 | 1403261  | 193102.7 | 5548087  | 386042.3 | 328263.7 | 372125.4 |
| 10133819 | 14616795 | 272776.1 | 15396.96 | 123958.6 | 1928272  | 37021255 | 34422823 | 59221.69 | 583288.1 |
| 2921462  | 2143998  | 506078.8 | 188484.5 | 1238284  | 9643825  | 5431780  | 4698920  | 260306.5 | 1731230  |
| 1321503  | 940142.3 | 276142.5 | 184991.8 | 950967.7 | 3278016  | 2811879  | 1108137  | 245564.5 | 795793.9 |
| 641351.8 | 345715.5 | 118467.6 | 66335.35 | 362878.4 | 1061119  | 2076895  | 629772.5 | 366161.9 | 342717   |
| 14432110 | 8950543  | 3443909  | 2923636  | 10069941 | 39828388 | 25396614 | 19356715 | 2050614  | 7904191  |
| 5200535  | 2800090  | 1774612  | 1226810  | 2819679  | 2509143  | 14437741 | 7879744  | 1846825  | 4388884  |
| 1175033  | 707760.2 | 265729.8 | 378764   | 1871065  | 1315807  | 2683546  | 1823697  | 90553.65 | 940834.6 |
| 24620976 | 15242515 | 6242809  | 6417951  | 19717874 | 64833647 | 41099268 | 32160828 | 3804293  | 13633988 |
| 1102481  | 1096126  | 806149.4 | 602191.8 | 1160256  | 2511467  | 1115323  | 1317950  | 144118.4 | 337940.4 |
| 335347.5 | 227858   | 394808.9 | 528869.8 | 500731.5 | 258304.3 | 138645.3 | 359097.9 | 202993.5 | 96408.19 |
| 1.36E+08 | 1.37E+08 | 6600373  | 3238861  | 63666773 | 69469365 | 4.21E+08 | 1.48E+08 | 5418429  | 17900854 |
| 1044514  | 777897.8 | 191077.7 | 30612.09 | 371669.5 | 2280296  | 1695121  | 946185.7 | 186326.7 | 514879.1 |
| 3173233  | 2230791  | 307253.8 | 120969.3 | 781297.2 | 6284974  | 6346032  | 3479596  | 368977   | 1718986  |
| 20296801 | 29406097 | 539069.1 | 40412.33 | 213314.5 | 3785096  | 74359710 | 69027430 | 132118   | 956145.1 |
| 331837.8 | 198396.8 | 142409.6 | 101116.4 | 216449.9 | 239161.2 | 784647   | 490237.2 | 33177.1  | 228239.3 |
| 368344.3 | 385177.2 | 68045.43 | 15458.01 | 251890.5 | 739030.1 | 515608.6 | 988837.7 | 3628.56  | 94062.33 |
| 4446045  | 4322155  | 979671.7 | 144290.7 | 2155308  | 11904491 | 3775813  | 7169913  | 313355.5 | 316290.9 |
| 181028.7 | 132385.5 | 20657.22 | 0        | 100956.5 | 419340.5 | 502729.5 | 334039.2 | 6144.569 | 101975.3 |
| 852703   | 274696.7 | 738875.8 | 673569.2 | 908842.1 | 719790.4 | 1059345  | 1269795  | 801754.8 | 744480   |
| 593345.1 | 300298.9 | 692570.4 | 786958.6 | 664505.4 | 395974.2 | 234004.2 | 644761.9 | 273742.8 | 289669.8 |
| 136713.1 | 54960.04 | 54581.34 | 58857.93 | 52766.51 | 49808.47 | 597320.8 | 180772.7 | 144897.1 | 87217.53 |
| 398153.7 | 444092.2 | 6508.84  | 8181.603 | 30567.86 | 563395.6 | 1054804  | 913727   | 47830.24 | 125531.4 |
| 1104275  | 863844.3 | 112712.2 | 87554.6  | 493602.9 | 1810623  | 2331929  | 1357547  | 54140.75 | 567188.1 |
| 283025.1 | 260200.9 | 37078.98 | 50823.59 | 88381.66 | 367737.1 | 678318.5 | 132612.6 | 25233.19 | 199766.4 |
| 1082767  | 706324   | 250477.9 | 219009.1 | 580166   | 1676502  | 2117971  | 2041038  | 284987.1 | 681071.5 |
| 7401486  | 7486043  | 219633.4 | 114507.4 | 3842185  | 3595993  | 23056576 | 6314325  | 1123472  | 1089475  |
| 219911.1 | 143540.6 | 31260.62 | 19743.37 | 123922.9 | 566850.2 | 512595.4 | 273207.8 | 35847.71 | 105223.7 |
| 2918210  | 3614458  | 367435.7 | 244324.2 | 1914939  | 11651126 | 3417077  | 8912266  | 285355.3 | 801288.4 |
| 3930389  | 4150131  | 26282.74 | 88933.67 | 1395845  | 10145691 | 11560379 | 3569827  | 230378.5 | 690238.6 |
| 203116.7 | 135451.9 | 0        | 0        | 16074.53 | 305854.2 | 906368.4 | 280038   | 47553.75 | 209698.6 |
| 417876.5 | 302953.9 | 117251.4 | 109878.7 | 498754   | 1234912  | 406593.2 | 820476.5 | 129903.7 | 103929   |

|          |          |          |          |          |          |          |          |          |          |
|----------|----------|----------|----------|----------|----------|----------|----------|----------|----------|
| 1087629  | 1151972  | 1581912  | 1005877  | 1041828  | 602407.6 | 1845528  | 230472.8 | 431446.9 | 2030208  |
| 161989.8 | 132671.9 | 9806.22  | 5353.072 | 30510.04 | 651709.9 | 269417.8 | 273344.6 | 4182.561 | 79762.21 |
| 30262026 | 17080676 | 4322899  | 2419653  | 14153902 | 71670154 | 41522152 | 51572875 | 6044801  | 22935296 |
| 439285.5 | 346107.8 | 36450.67 | 12570.27 | 163410.9 | 1234533  | 1101367  | 577967   | 29098.14 | 250071.1 |
| 2282020  | 1938111  | 190729.4 | 207528.8 | 91294.34 | 4044621  | 5287825  | 3884880  | 401046.3 | 1406881  |
| 107091.1 | 87426.39 | 34435    | 62468.49 | 138008.9 | 82583.46 | 166166.8 | 86955.85 | 4730.883 | 63416.2  |
| 1613702  | 982617.5 | 250199.9 | 327913.3 | 871644.9 | 2604504  | 3174975  | 1991844  | 269480.1 | 909959.4 |
| 1871344  | 1643358  | 51670    | 3159.106 | 291379.9 | 4875460  | 2773518  | 3897623  | 29250.97 | 349780   |
| 26714221 | 11770882 | 10456279 | 5644438  | 16870116 | 54761884 | 34113683 | 27393104 | 8929329  | 22758627 |
| 971012.1 | 567461   | 426748.9 | 304642.1 | 544852.1 | 1752826  | 1396079  | 1651938  | 288886   | 531548.7 |
| 1193629  | 804234.1 | 521895.6 | 356860   | 701128.4 | 1478897  | 3714168  | 2198994  | 0        | 1141594  |
| 706041.7 | 202629   | 197266.4 | 93488.28 | 526199.8 | 1446123  | 1648219  | 835013.5 | 484926.2 | 860632.9 |
| 3509549  | 3059821  | 2821.915 | 3190.45  | 107802.9 | 5352639  | 9452045  | 5492791  | 832267.8 | 2662798  |
| 1119758  | 658475.3 | 393430.6 | 266453.3 | 577011.3 | 1564617  | 2256308  | 1120003  | 285040.3 | 868264   |
| 331857.6 | 306666.7 | 44309.87 | 63799.67 | 57370.03 | 244703.6 | 995116.2 | 518168.7 | 50819.62 | 164861.6 |
| 793959.3 | 394299.8 | 164718.3 | 968593.6 | 408763.8 | 1414966  | 701083   | 547270.6 | 486491.5 | 501149.1 |
| 450023.6 | 451279.6 | 133977.8 | 1313932  | 313320.5 | 242843.5 | 570166.3 | 137115.7 | 223231.9 | 92842.04 |
| 456952.9 | 228382.6 | 454773.1 | 601368.3 | 500448.7 | 659304.8 | 210968.1 | 701550.2 | 290776   | 179056.7 |
| 134341.3 | 105243.6 | 9058.486 | 4600.299 | 22124.76 | 316505.7 | 230003.5 | 155084   | 8418.81  | 62699.87 |
| 88436462 | 53191005 | 23075524 | 23705586 | 70652929 | 2.28E+08 | 1.48E+08 | 1.14E+08 | 15292716 | 50448535 |
| 2195743  | 1558774  | 47277.69 | 56811.75 | 482044.2 | 5891217  | 3016055  | 2661824  | 325552.5 | 1046523  |
| 329697.7 | 328066.2 | 63018.73 | 12755.98 | 215614.9 | 76131.58 | 1017281  | 356411   | 33311.54 | 39460.46 |
| 17209266 | 10838708 | 4096816  | 3409055  | 10863794 | 50391504 | 28637518 | 24204222 | 2189107  | 9129275  |
| 164956.2 | 107160.5 | 2415.448 | 6605.446 | 13333.96 | 460262.5 | 479998.7 | 237432.5 | 12429.42 | 119252.8 |
| 10475913 | 13594967 | 8702903  | 1986998  | 15272783 | 2355541  | 16480029 | 33481871 | 52608.18 | 11922532 |
| 678177.8 | 449907.6 | 0        | 0        | 27352.39 | 331770.1 | 2453683  | 826133.6 | 420654   | 1149722  |
| 1157260  | 745074.2 | 518685.1 | 221811.1 | 2119478  | 1422099  | 985144.7 | 1743602  | 683522.5 | 774953.8 |
| 1266280  | 897967.8 | 33328.45 | 28957.07 | 579481.3 | 1638528  | 3245546  | 2257888  | 294034.8 | 1027731  |
| 633247.7 | 1225609  | 281991.1 | 507847.2 | 480830.2 | 1114629  | 139721.7 | 0        | 2820673  | 104951.5 |
| 753173.6 | 492431.5 | 90708.56 | 46956.57 | 192038.9 | 1934868  | 1030338  | 1182248  | 100050.3 | 383598.7 |
| 199153.4 | 56416.35 | 154127.9 | 202674.2 | 64875.25 | 178963.4 | 338819.8 | 289502.1 | 142476.4 | 162425.1 |
| 412338.7 | 324104.6 | 23277.96 | 10171.78 | 10896.54 | 119585.5 | 1530205  | 856567.9 | 186448.3 | 472354.7 |
| 455592.9 | 342686.4 | 46979.6  | 11789.26 | 224941.3 | 1018254  | 702430.9 | 847630.5 | 36423.94 | 249147.8 |
| 119888.2 | 88789.79 | 49153.72 | 52792.3  | 27084.95 | 127382.6 | 276833.7 | 138094.9 | 15633.9  | 149460.3 |
| 447112.6 | 191923.5 | 285031.2 | 280056.5 | 360655.1 | 765997.1 | 691645.2 | 556465.4 | 306808.7 | 399904.3 |
| 768455.7 | 636519   | 0        | 7647.507 | 0        | 485997.3 | 2694134  | 1084750  | 33437.31 | 738703.6 |
| 162056.4 | 132453.2 | 0        | 0        | 17889.23 | 218207.5 | 745625.4 | 248419.1 | 7475.336 | 151723.1 |
| 547508.8 | 660700.5 | 0        | 0        | 0        | 1317298  | 973584.6 | 1582160  | 15309.35 | 0        |
| 301224.6 | 228793.4 | 72665.66 | 92571.36 | 123794.6 | 643655.1 | 408630.9 | 328699.6 | 12759.81 | 126578.5 |
| 31750747 | 20195526 | 8087565  | 9774893  | 26819633 | 69440943 | 61802416 | 41501214 | 4229931  | 16855481 |
| 2432911  | 1706478  | 452682.2 | 258777.1 | 2854259  | 2886848  | 4505969  | 2182908  | 111108.4 | 2201799  |
| 3330217  | 1028032  | 568348.6 | 5812800  | 5590084  | 2233201  | 3653272  | 4907902  | 3840111  | 2761960  |
| 2023531  | 1975945  | 6767.003 | 5026.556 | 133176.3 | 1432117  | 6819814  | 3451050  | 88839.33 | 1875700  |
| 2900965  | 1971137  | 630615.8 | 355651.2 | 2081024  | 7489548  | 5775095  | 2415157  | 609068.4 | 1833215  |
| 16244724 | 11328112 | 645797.6 | 319595.1 | 6996621  | 24962906 | 38473794 | 29145557 | 4104231  | 13250524 |
| 671465.5 | 559742.3 | 269588.6 | 256832.2 | 100805.6 | 944427.3 | 2306303  | 1028463  | 53937.34 | 625361.4 |
| 1753432  | 937638.1 | 1813305  | 2748960  | 1393645  | 555633   | 1664208  | 1892023  | 228297.4 | 1767734  |

|          |          |          |          |          |          |          |          |          |          |
|----------|----------|----------|----------|----------|----------|----------|----------|----------|----------|
| 324295.5 | 216296.7 | 86024.48 | 48532.51 | 195975.3 | 898946.2 | 599264.4 | 291076.2 | 40723.31 | 219458.9 |
| 297124.7 | 199904.1 | 62269.57 | 60097.31 | 253433.6 | 683158.8 | 598368.5 | 331435.3 | 42165.27 | 155507.5 |
| 461542.2 | 363610.4 | 80699.06 | 115897.5 | 206836.1 | 828775.1 | 822645.8 | 453121.3 | 15355.76 | 200877.8 |
| 149159.1 | 144918.2 | 6423.634 | 0        | 19413.23 | 203299.8 | 406554.2 | 154352.4 | 12824.7  | 89809.67 |
| 679786.1 | 484283.2 | 94007.72 | 143911   | 323112.3 | 1600998  | 853648.2 | 1194937  | 52892.57 | 393722.4 |
| 322841.9 | 237509.9 | 51405.33 | 80410.9  | 66458.08 | 802193.9 | 419344.9 | 390117.8 | 34144.39 | 132709.3 |
| 275432.8 | 282200.3 | 78998.88 | 93899    | 96674.85 | 494554   | 821712.9 | 577675.5 | 36472.64 | 82939.48 |
| 1120787  | 705787.9 | 98498.15 | 60273.55 | 271493.6 | 2520794  | 1992596  | 1860634  | 194309.9 | 590132.8 |
| 597039.8 | 454958.9 | 106531.1 | 134594.7 | 142522.7 | 196448   | 1956804  | 1100166  | 63559.21 | 263871.1 |
| 775762.7 | 709755.4 | 15033.18 | 2539.118 | 50118.18 | 1119180  | 2126251  | 1557922  | 101828.9 | 491325.2 |
| 179878.2 | 124741.3 | 0        | 0        | 0        | 8275.177 | 723216.9 | 149629.6 | 142814.4 | 322075.8 |
| 919732.6 | 681865.2 | 12416.87 | 28059.57 | 561856.2 | 1325631  | 3433510  | 1682051  | 60660.51 | 1318088  |
| 955869.4 | 689312.5 | 356659.7 | 32267.64 | 806167.2 | 490161.4 | 2520852  | 1976765  | 338462.5 | 505603.6 |
| 447184.4 | 226642.8 | 81608.49 | 94117.9  | 435664.2 | 588716.5 | 845264.1 | 608089.2 | 69584.12 | 400445.1 |
| 666652.1 | 438550.6 | 83449.88 | 82275.58 | 143318   | 352387.4 | 2184707  | 532654.3 | 201399   | 618588.1 |
| 2371690  | 834556   | 2232524  | 3099935  | 2915778  | 1692912  | 1384633  | 2695148  | 1420995  | 1541072  |
| 3308695  | 2803737  | 477826.4 | 121516.7 | 343861.8 | 318627.1 | 12364940 | 7919092  | 1890615  | 1750181  |
| 2567501  | 1807464  | 359306.6 | 414041.6 | 1178113  | 5548307  | 3934604  | 4091192  | 260041.9 | 997315.9 |
| 3376250  | 1419462  | 1463195  | 738027   | 2219886  | 6581503  | 4542526  | 3885140  | 1060916  | 3100108  |
| 87697991 | 52139221 | 2868443  | 1502039  | 9406952  | 1.42E+08 | 2.27E+08 | 1.45E+08 | 26063943 | 76825951 |
| 355532.5 | 429533.5 | 39376.11 | 32781.95 | 144974.9 | 631307.7 | 674563.3 | 1100259  | 24436.76 | 222819.8 |
| 189647.6 | 208300.6 | 12277.36 | 18475.49 | 59209.94 | 534508.6 | 180545.1 | 432951.2 | 5516.83  | 16487.65 |
| 3097540  | 2083877  | 413129.4 | 165426   | 927568.5 | 5803569  | 6409364  | 3217522  | 437887.6 | 1870698  |
| 1671308  | 1078458  | 19495.43 | 9295.476 | 164560.3 | 2894046  | 4200761  | 2105548  | 310167.6 | 736562   |
| 273989.4 | 168625.6 | 226322.9 | 160364.4 | 277054.8 | 266675.6 | 545234.4 | 511251   | 48091.74 | 240215.6 |
| 912711.4 | 928800.6 | 0        | 0        | 16554.72 | 1447772  | 2415767  | 1492840  | 46517.23 | 624248.7 |
| 1509325  | 718490.5 | 495295.8 | 299758   | 893979.4 | 2327196  | 2884482  | 2060679  | 404583.9 | 1161878  |
| 661374.2 | 449695   | 71899.68 | 133465.7 | 303741.3 | 2088332  | 1174968  | 824477.3 | 72557.25 | 304587.6 |
| 84267.27 | 60921.77 | 0        | 0        | 0        | 6836.425 | 336971.4 | 143535.3 | 0        | 73447.21 |
| 220738.9 | 218185.6 | 51163.05 | 36108.24 | 82064.3  | 864836   | 265067.1 | 421343.7 | 37457.79 | 31431.57 |
| 459502.9 | 385604.7 | 63219.59 | 94633.57 | 186833.9 | 1512592  | 787618.7 | 463117   | 112586.4 | 46511.16 |
| 2201928  | 3163415  | 932886.9 | 783851.6 | 2939630  | 2056003  | 6107098  | 7666644  | 0        | 2106767  |
| 442201.5 | 273977.9 | 65894.9  | 21316.57 | 152870.4 | 876654.2 | 852677.9 | 454463.3 | 51642.27 | 324992.4 |
| 2663654  | 1985984  | 64702.59 | 93683.51 | 410237.3 | 4840191  | 6225218  | 4425057  | 602963.8 | 1533595  |
| 502194.3 | 548816   | 33203.18 | 0        | 209442.3 | 1327557  | 575956.5 | 733226   | 34175    | 91743.17 |
| 106647   | 84330.47 | 16150.09 | 18791.58 | 18985.82 | 179917.4 | 236013.7 | 243029.9 | 27871.83 | 76195.66 |
| 10399434 | 7126350  | 257328.4 | 142034.5 | 1574858  | 19934787 | 23666295 | 14923460 | 2683939  | 7879908  |
| 5483086  | 6398566  | 834971.8 | 2631970  | 19631742 | 6597052  | 2390181  | 3035239  | 169148.4 | 2926352  |
| 1155894  | 481114.1 | 547401.9 | 1821474  | 1493036  | 840734.6 | 738492.5 | 751852.1 | 1316844  | 1917182  |
| 577091.2 | 369280.7 | 157493.7 | 211154.4 | 248564.6 | 1143222  | 854224.8 | 717599.3 | 106060   | 265536.9 |
| 573617.2 | 432279.8 | 29420.31 | 34675.9  | 239050.9 | 1056958  | 1176035  | 502655.3 | 41426.4  | 426168.7 |
| 1005694  | 925793.5 | 3458.617 | 0        | 27373.9  | 1529836  | 2744217  | 1768226  | 203936   | 777305.7 |
| 733453.9 | 893744.9 | 0        | 0        | 64488.04 | 2969925  | 1373339  | 369817.8 | 5875.514 | 72402.31 |
| 4459682  | 3432361  | 161207.9 | 44321.55 | 1173823  | 6467339  | 11594870 | 7292117  | 800103   | 2463905  |
| 334948.8 | 303083.7 | 25177.48 | 13762.05 | 70560.89 | 679759.1 | 1165551  | 817150.6 | 72692.58 | 87732.19 |
| 2690545  | 1999967  | 297400.6 | 230389.3 | 842202.2 | 9378828  | 4796578  | 2352559  | 341194.2 | 1303455  |
| 226004.6 | 143430.3 | 27767.51 | 42964.82 | 152909.9 | 511696.3 | 529129.1 | 384800.3 | 27402.8  | 132722.7 |

|          |          |          |          |          |          |          |          |          |          |
|----------|----------|----------|----------|----------|----------|----------|----------|----------|----------|
| 355339.6 | 197639.1 | 72402.83 | 61193.39 | 155980.4 | 854882.7 | 449275.7 | 377000.6 | 111531.8 | 224467.7 |
| 80256294 | 50073649 | 2560091  | 1375579  | 7950167  | 1.26E+08 | 2.13E+08 | 1.27E+08 | 22807979 | 67242106 |
| 15051998 | 8666071  | 3736406  | 1790978  | 6962993  | 21062505 | 52400052 | 18252359 | 4436541  | 8869598  |
| 573933.1 | 506364.4 | 331891.4 | 285368.1 | 498705.5 | 1491841  | 587431   | 683113.2 | 100597.8 | 173681.4 |
| 2.47E+08 | 2.07E+08 | 16489126 | 16249597 | 3.92E+08 | 2.04E+08 | 7.84E+08 | 2.42E+08 | 20102153 | 1.07E+08 |
| 528635.3 | 321211.1 | 103839.6 | 64575.36 | 286819.1 | 1435758  | 1078381  | 776957.8 | 117184.8 | 314594.8 |
| 5589660  | 4245684  | 94747.56 | 198943.5 | 4197810  | 7367705  | 20449039 | 11874354 | 0        | 5689481  |
| 8398509  | 4993925  | 1400214  | 1691002  | 4435224  | 13821321 | 16639344 | 14178405 | 1405982  | 6228361  |
| 1070699  | 710788   | 104359   | 80301.66 | 297397.8 | 2460259  | 1805573  | 1844245  | 172916.2 | 477125.1 |
| 315145.3 | 230359.9 | 61253.92 | 22945.5  | 185124.7 | 738508.1 | 767915.5 | 287817.1 | 24445.78 | 181717.2 |
| 46564.17 | 45130.17 | 2456.663 | 0        | 0        | 47880.64 | 146789.3 | 96542.71 | 0        | 0        |
| 1149328  | 1280664  | 469666.5 | 253361.3 | 996184.8 | 1593165  | 3232810  | 3347038  | 138769.2 | 354483.1 |
| 4381811  | 2966414  | 0        | 0        | 1062673  | 3899627  | 13906661 | 7256124  | 32180.2  | 4774987  |
| 1255015  | 595725.3 | 330976.5 | 185042.4 | 725791.8 | 2886727  | 2831108  | 1632303  | 327469.6 | 979727.6 |
| 103791.9 | 67260.78 | 84711.24 | 97093.53 | 60238.08 | 87228.49 | 233574.5 | 139657.2 | 0        | 74309.84 |
| 118417.2 | 133543   | 37019.95 | 51753.27 | 42179.65 | 65739.06 | 313928.5 | 130492.4 | 4873.628 | 128111.6 |
| 3440344  | 3405395  | 5902.134 | 6621.489 | 171349.8 | 10016280 | 9934014  | 4515664  | 70849.47 | 1306309  |
| 502715.3 | 405523.7 | 110773.7 | 333724.3 | 337921   | 1158306  | 841538.8 | 485337.3 | 118113.8 | 131911.9 |
| 270734.7 | 248394.8 | 139520   | 87016.76 | 249193.3 | 451767.3 | 573098.5 | 674474.5 | 67678.81 | 270050.8 |
| 231552.9 | 155387.6 | 0        | 12101.77 | 127641.8 | 433376.6 | 460084.5 | 348840.3 | 29756.72 | 140996.3 |
| 1752912  | 1116113  | 388965.7 | 259474.2 | 1210673  | 4314196  | 3589977  | 1521278  | 352011.9 | 1132257  |
| 1322116  | 931164.4 | 238497.9 | 81749.9  | 639271.5 | 3276194  | 3229193  | 1025622  | 199031.4 | 814915.4 |
| 213317.4 | 192142.1 | 10064.18 | 11231.18 | 40176.84 | 81881.66 | 752112.1 | 452899   | 5620.131 | 45343.87 |
| 142217   | 91421.14 | 31759.69 | 61716.16 | 34926.99 | 387910.6 | 280878   | 177693.5 | 39405.25 | 111854.4 |
| 72468.15 | 81259.55 | 0        | 2931.293 | 0        | 61127.06 | 383134.8 | 189563.2 | 11875.94 | 37726.61 |
| 198774.5 | 253951.8 | 37946.82 | 31408.94 | 165967.9 | 351344.7 | 561377   | 71259.74 | 25627.6  | 131957.4 |
| 227189.5 | 178735.8 | 55808.44 | 33106.28 | 65509.04 | 111950.1 | 713919.4 | 395990.7 | 26523.9  | 251591.9 |
| 496105.2 | 159908.7 | 370420.3 | 333474.7 | 357634.9 | 460344.2 | 838895.8 | 360566.5 | 324504.8 | 575362   |
| 558727.1 | 517950   | 235147.8 | 67670.46 | 424340.1 | 1796285  | 658241.2 | 1316559  | 25341.86 | 136327.9 |
| 132477.2 | 110278.6 | 12229.57 | 3133.312 | 23283.58 | 363275.3 | 174240.5 | 244829.5 | 3917.114 | 49001.55 |
| 718753.1 | 748790.1 | 310509.4 | 183558.9 | 565811.4 | 1322534  | 815269.7 | 1902019  | 33136.05 | 147446.6 |
| 2664083  | 2045963  | 193601.4 | 107483.4 | 1273275  | 11085167 | 2955149  | 3741716  | 207662.7 | 1302387  |
| 2824168  | 1903407  | 560448.9 | 239784.6 | 1193158  | 5903083  | 4767486  | 5441681  | 475896.3 | 1578264  |
| 1169399  | 831027.9 | 42861.88 | 13817.41 | 511169.6 | 1647062  | 2952606  | 2204568  | 324096.7 | 973269.9 |
| 4006373  | 3922978  | 151011   | 15963.34 | 1022211  | 3067608  | 12784588 | 8953224  | 50175.33 | 2238688  |
| 1289306  | 719083.8 | 716164.7 | 395121.8 | 1091232  | 2714876  | 2069745  | 1631061  | 86351.48 | 1270726  |
| 901530   | 600080.1 | 152144.2 | 140906.3 | 369122.4 | 1730911  | 1661720  | 944853.4 | 36922.35 | 679920   |
| 497579.1 | 294080.2 | 169434.5 | 603905.4 | 399585.9 | 311333.1 | 1231958  | 721254.2 | 156966.3 | 330865.5 |
| 3804260  | 2414139  | 456098.2 | 269230   | 1560597  | 7775968  | 6990695  | 6509868  | 664525.7 | 1938965  |
| 2291358  | 2170967  | 435469   | 426201.7 | 423613.4 | 9726143  | 2504275  | 1852433  | 101492   | 775086   |
| 1324633  | 840854.5 | 309207.4 | 273297.8 | 622460.9 | 2579653  | 3623424  | 963248.5 | 352295.7 | 943447.7 |
| 12786115 | 17390308 | 84132.43 | 182044.1 | 1909275  | 11339284 | 39632134 | 11403412 | 36120.16 | 5351521  |
| 7043306  | 5349017  | 230265.8 | 179261.6 | 549587   | 12129601 | 17730668 | 14574344 | 1529051  | 5863286  |
| 266337.5 | 207853.1 | 62864.25 | 43619.78 | 179881   | 640930.1 | 561122.3 | 218737.5 | 57767.56 | 131495.3 |
| 434501.5 | 54878.8  | 623517.1 | 210615.7 | 585043.5 | 491842.7 | 343649.6 | 393437.9 | 412498.2 | 391743.6 |
| 5881472  | 4296799  | 90123.57 | 131437.4 | 393273.9 | 9158701  | 15900947 | 8993883  | 1375857  | 4440281  |
| 10820534 | 16514664 | 47984.33 | 20832.53 | 46324.79 | 1891458  | 41187265 | 38953809 | 75704.55 | 1256582  |



|          |          |          |          |          |          |          |          |          |          |
|----------|----------|----------|----------|----------|----------|----------|----------|----------|----------|
| 379206.4 | 255972.8 | 71116.2  | 79795.14 | 168766.7 | 757771.3 | 633728.8 | 252834   | 69170.74 | 284533.9 |
| 288268.8 | 239103.9 | 51750.59 | 22772.99 | 122344.2 | 890816.7 | 160199.6 | 114108   | 22233.33 | 245872.8 |
| 907880.5 | 638069.4 | 115760.5 | 58063.43 | 269927.5 | 1787527  | 1814391  | 734668.6 | 169873.4 | 545894.7 |
| 5619131  | 8388278  | 5309033  | 2447588  | 14964769 | 1842027  | 7957265  | 20494731 | 109803   | 2201884  |
| 1123777  | 1073890  | 2492.46  | 8504.688 | 50661.34 | 677588.2 | 3959900  | 1882303  | 224684.5 | 506688.8 |
| 374502.9 | 234509.7 | 138031.5 | 234175.1 | 310996.1 | 536686.8 | 810450.5 | 238690.5 | 174352.3 | 227515.3 |
| 254983.1 | 216811.6 | 58313.78 | 23680.35 | 162199.5 | 581649.1 | 310437.7 | 179115   | 21824.88 | 108283.6 |
| 20063854 | 14696304 | 1735388  | 780408.8 | 6758824  | 66149431 | 39358279 | 26335271 | 1801681  | 7138702  |
| 1017369  | 887142.5 | 40192.79 | 24213.51 | 361000.1 | 687611.9 | 3255415  | 1022858  | 133131   | 179227.7 |
| 514567.8 | 535300.3 | 126994.2 | 120061.2 | 424642.3 | 1152278  | 448598.2 | 1159590  | 137144.2 | 59186.45 |
| 350136.6 | 279707.2 | 163806.8 | 89562.27 | 217441.1 | 486364.2 | 998496.8 | 566885.8 | 4944.011 | 86135.81 |
| 21501950 | 18601381 | 9312889  | 2893237  | 13782994 | 72729104 | 23592695 | 47907309 | 1204959  | 7081226  |
| 98317407 | 60904695 | 25829873 | 31499848 | 82451135 | 2.1E+08  | 1.89E+08 | 1.29E+08 | 14598069 | 54145069 |
| 12933466 | 8382632  | 3040764  | 2414661  | 8809465  | 37038883 | 20799288 | 17890738 | 1574496  | 6534060  |
| 271328.1 | 219397.8 | 29931.86 | 13487.66 | 55688.78 | 680447   | 415104   | 543835.1 | 31882.41 | 59938.24 |
| 527923.3 | 284700.4 | 195486.3 | 141060   | 54096.8  | 1065005  | 937661.8 | 447277   | 71074.39 | 615256.8 |
| 524592.4 | 378125.4 | 44787.78 | 93729.25 | 134698.8 | 1052322  | 1016636  | 747949.2 | 62760.43 | 293373.8 |
| 24613850 | 17403179 | 5555327  | 7175206  | 17972841 | 44434149 | 37142398 | 28829595 | 3300498  | 12037068 |
| 97922.31 | 86751.34 | 0        | 21719.72 | 37252.68 | 72103.71 | 294002.1 | 149436.5 | 4055.867 | 15643.16 |
| 199575.1 | 139046.2 | 10784.15 | 0        | 50048.86 | 498931.4 | 322854.8 | 173013.5 | 17306.63 | 180670.5 |
| 2107392  | 2224727  | 3243.065 | 2883.062 | 108930.2 | 5219542  | 6968506  | 2746062  | 59684.9  | 729676.2 |
| 488655.2 | 583028.4 | 0        | 0        | 0        | 1175208  | 1703329  | 795522.8 | 6574.689 | 169355.9 |
| 1539332  | 1153157  | 188136.3 | 124726.4 | 619683.3 | 4575190  | 3210438  | 1810385  | 173072.7 | 898798.8 |
| 496829.3 | 153321.7 | 409788.3 | 492987.1 | 467880.5 | 644389   | 546522.2 | 433185.2 | 374818.7 | 361732.3 |
| 117973.3 | 88391.02 | 24981.88 | 0        | 45558.45 | 141208.3 | 310782   | 148746.8 | 19332.76 | 71845.75 |
| 726983.4 | 1140963  | 641071.4 | 390967.3 | 1988314  | 439057.6 | 749782.6 | 2752174  | 0        | 202828.1 |
| 3658341  | 4882987  | 2746657  | 4150502  | 932123.9 | 5496706  | 2686155  | 12305354 | 1878098  | 892033.9 |
| 277822.1 | 429506.1 | 147908.5 | 144688.5 | 495099.5 | 194893.5 | 206991.8 | 1043858  | 81770.68 | 107044.2 |
| 796828.3 | 683285.5 | 90803.16 | 150527.8 | 130868.5 | 2005075  | 2157991  | 1361020  | 73159.83 | 519573.8 |
| 468103.4 | 365324   | 0        | 2428.826 | 4975.866 | 755888.5 | 1279276  | 923157.8 | 59801.29 | 181915.7 |
| 428687.9 | 167254.7 | 329025.9 | 419245.8 | 420046.7 | 534016.3 | 522153.7 | 269621.8 | 385765.5 | 383861.9 |
| 620244.5 | 435534.9 | 93313.29 | 65790.95 | 371872   | 452532.4 | 2620668  | 1324761  | 148735.1 | 543540.9 |
| 1177801  | 779920   | 145234.8 | 199802.2 | 440939.9 | 2859833  | 2953147  | 1446628  | 85384.45 | 921009.9 |
| 6780917  | 7759062  | 2089194  | 1462516  | 6147002  | 4490060  | 25048924 | 19063808 | 188575.6 | 1874223  |
| 1702098  | 1381931  | 76482.44 | 78727.7  | 99036.86 | 3462683  | 3776069  | 2780303  | 339747.9 | 1080516  |
| 2563083  | 2587301  | 774435.8 | 485165.1 | 1649760  | 3673521  | 4861227  | 6488260  | 303196.1 | 1232682  |
| 161609.9 | 117199.6 | 85317.49 | 100010.1 | 86914.17 | 200288.7 | 274052.8 | 217910.5 | 24938.36 | 158307   |
| 150069   | 104750.5 | 0        | 4941.529 | 9319.495 | 21453.25 | 892100.8 | 301121.5 | 83995.32 | 201090.4 |
| 286621.4 | 126578.4 | 139324   | 98184.6  | 82513.59 | 633321.8 | 613319   | 336538.3 | 98661.46 | 219906.2 |
| 244210.3 | 139832.1 | 32658.53 | 12161.04 | 174234   | 117016.3 | 742292   | 422687.9 | 50015.79 | 174947.7 |
| 394847.9 | 59396.97 | 380864   | 653482.1 | 558340.1 | 142857.1 | 329036.5 | 481692.2 | 361710.6 | 409030.1 |
| 1968636  | 1377700  | 201215.9 | 88776.47 | 755759.3 | 3701080  | 4078402  | 2933264  | 127067   | 1326318  |
| 1.37E+08 | 88789509 | 34298871 | 34544164 | 1.02E+08 | 3.54E+08 | 2.3E+08  | 1.68E+08 | 21118947 | 73705291 |
| 188431.7 | 155026.7 | 90404.85 | 152671.4 | 128975.5 | 184523.3 | 310529.7 | 190498.6 | 32986.92 | 78472.71 |
| 89126231 | 57249817 | 21265301 | 12832423 | 58262558 | 2090722  | 2.93E+08 | 95734677 | 2460765  | 1.29E+08 |
| 44471784 | 27820605 | 11169078 | 9165282  | 29993827 | 1.23E+08 | 73251606 | 61767507 | 6189049  | 23786552 |
| 7169259  | 4538532  | 1059667  | 551538.6 | 2495207  | 14398125 | 13802149 | 7257986  | 1064208  | 4833678  |

|          |          |          |          |          |          |          |          |          |          |
|----------|----------|----------|----------|----------|----------|----------|----------|----------|----------|
| 103623.2 | 76065.7  | 0        | 0        | 0        | 94151.51 | 351530.9 | 135486.3 | 10277.73 | 39483.87 |
| 278299.9 | 161440.6 | 42571.68 | 22072.66 | 87766.33 | 735646.9 | 670610.5 | 261160.4 | 125585.3 | 119077.7 |
| 198101.7 | 150095.6 | 153037.8 | 326572.9 | 214257.4 | 316007.3 | 59356.55 | 375647   | 92140.25 | 55878.72 |
| 11657118 | 9070287  | 335886.9 | 162000.4 | 442870.4 | 3429443  | 44763790 | 25608572 | 3915968  | 8400610  |
| 1035154  | 814074   | 84343.72 | 82761.09 | 120063.2 | 197763.9 | 3897700  | 2220796  | 336786.4 | 748456.6 |
| 1041583  | 683880.2 | 177730.1 | 1238739  | 385902.3 | 2188491  | 1672093  | 1831497  | 139095.9 | 552105.1 |
| 208944.8 | 142029   | 17411.35 | 10790.65 | 54285.65 | 452504.7 | 400120.6 | 212273.2 | 51678.98 | 205646.2 |
| 453477.4 | 277987.8 | 71843.77 | 73335.18 | 137595.4 | 1730403  | 577172   | 616863.6 | 61146.26 | 284503.7 |
| 6211102  | 6609040  | 2409232  | 4927390  | 10644742 | 4136044  | 12239836 | 4352854  | 4719212  | 3273876  |
| 136413.9 | 57370.89 | 98636.07 | 77124.5  | 123284.9 | 210148.9 | 207967.5 | 108722.2 | 90349.71 | 144096.8 |
| 170947.2 | 194059.5 | 93563.82 | 82337.05 | 410951.9 | 94550.95 | 274459.6 | 502198   | 0        | 126093.9 |
| 3945058  | 3047510  | 114370.4 | 62205.44 | 1686725  | 5455725  | 10203166 | 7770009  | 876889.6 | 3080020  |
| 4895493  | 4814687  | 147454.7 | 93322.89 | 1346688  | 4372528  | 15204448 | 3390982  | 245457.8 | 1433725  |
| 610273.5 | 398570.1 | 91711.16 | 95737.99 | 214444.1 | 1252235  | 1106245  | 610146.9 | 128549.7 | 411370.2 |
| 1643265  | 1947235  | 1011803  | 207750.9 | 3166647  | 575821.3 | 2294625  | 4792928  | 16995.6  | 2157054  |
| 493594.1 | 378371.6 | 39940.14 | 56878.66 | 217067.8 | 920287.7 | 984221.3 | 492276.7 | 15723.34 | 301744.8 |
| 376282.1 | 220025.2 | 28368.82 | 35009.13 | 164483.7 | 806577.4 | 668041.4 | 635433.2 | 61826.49 | 276922.3 |
| 1203886  | 927807.6 | 495769.1 | 57325.63 | 395957.6 | 535921   | 3787688  | 2246460  | 168546.9 | 823288.1 |
| 2351342  | 3084914  | 1932954  | 590197.7 | 4605439  | 472655.7 | 5770549  | 7811875  | 848696.6 | 559130.5 |
| 532860.3 | 377723.6 | 4630.894 | 0        | 115398.7 | 2208500  | 760583.4 | 595808.4 | 59671.36 | 374245.1 |
| 1609392  | 1171799  | 3375.455 | 14477.57 | 12305.84 | 2810996  | 6489932  | 2779931  | 175743.5 | 1238502  |
| 1969254  | 1658134  | 246546.8 | 52830.04 | 189685.3 | 644427.9 | 7250736  | 4685615  | 733584.3 | 1714707  |
| 2465629  | 441902.5 | 1117821  | 1322198  | 979627.9 | 4406404  | 3790771  | 2856122  | 2924557  | 1844435  |
| 373170.5 | 286946.2 | 18105.29 | 12174.02 | 61594.5  | 1034455  | 520940.6 | 505785.9 | 41690.91 | 123887.5 |
| 285781.1 | 221502.4 | 38360.51 | 37143.83 | 43160.33 | 20222.88 | 1077111  | 569970.5 | 21725.45 | 107153.5 |
| 11454986 | 6282787  | 3361613  | 3760469  | 6312361  | 19196354 | 20345435 | 12756246 | 2425761  | 8217026  |
| 2583011  | 1542586  | 330280.9 | 266511.4 | 937629.6 | 6789845  | 6071958  | 2743122  | 532416.2 | 2107320  |
| 5122416  | 3278165  | 726144.9 | 526720.4 | 2738756  | 12800734 | 11627989 | 8362265  | 592217   | 3042877  |
| 12945493 | 19088728 | 11503735 | 5694614  | 31757120 | 5277479  | 19493290 | 46734940 | 14653.47 | 6089643  |
| 160864.9 | 100607.5 | 0        | 2727.478 | 26245.22 | 69059.06 | 593271.1 | 171981.5 | 26999.6  | 175961.7 |
| 639908.3 | 480601.5 | 179284.3 | 214553.5 | 512842.6 | 1921249  | 720516.2 | 1222664  | 77718.15 | 213949.8 |
| 13669474 | 8787873  | 3546220  | 4258145  | 12386603 | 30718143 | 23449174 | 18178536 | 1859279  | 6998504  |
| 280599   | 225956.3 | 86229.93 | 65388.09 | 156839.9 | 587102.8 | 655146   | 197158.1 | 35559.73 | 136186.3 |
| 482048.3 | 309380.9 | 62813.04 | 41929.63 | 167439.6 | 1191838  | 1226963  | 698561.6 | 22114.46 | 355794.5 |
| 389689.3 | 335705.4 | 290324   | 52962.08 | 158484.1 | 1045553  | 612688   | 910512.6 | 25441.47 | 182588.9 |
| 1.77E+09 | 1.93E+09 | 986306.5 | 729012.5 | 2538382  | 1.68E+09 | 5.88E+09 | 3559519  | 2.06E+09 | 2.11E+09 |
| 29312524 | 23124008 | 11412014 | 65258018 | 39820596 | 23525428 | 19238558 | 15738880 | 18529053 | 70388183 |
| 292219.4 | 357917.9 | 0        | 3340.83  | 18883.75 | 76624.95 | 1117170  | 228645.1 | 16754.87 | 175057   |
| 4835570  | 4674293  | 4849.331 | 2410.956 | 102049.1 | 1004050  | 19140650 | 7544023  | 1200517  | 3095756  |
| 3087874  | 3817951  | 2093128  | 5591538  | 7910664  | 408553.9 | 1431101  | 1556653  | 2595201  | 289562.5 |
| 1651899  | 657677.2 | 103940.7 | 81602.31 | 456787.8 | 4814232  | 1932691  | 2334323  | 871537.4 | 1027383  |
| 2738720  | 2387970  | 91758.86 | 172313.8 | 963835.4 | 823116.5 | 9709912  | 4345139  | 0        | 755027.3 |
| 304939.9 | 225499.9 | 104133.6 | 150080   | 264739.2 | 466210.5 | 670007.6 | 202156.2 | 60741.5  | 318418.2 |
| 3128185  | 3089193  | 115116.3 | 623683   | 877701.7 | 4078514  | 8118146  | 2882643  | 183955.5 | 874787.8 |
| 151701.8 | 151763.9 | 35977.73 | 25702.08 | 115019   | 89875.93 | 405137.9 | 97571.63 | 4078.977 | 406374.7 |
| 396624.6 | 139466.2 | 438448.5 | 423076   | 457566.1 | 216933.8 | 379016.1 | 578159.2 | 201803   | 452969.1 |
| 15852278 | 13346163 | 5640969  | 24401952 | 22393173 | 11698474 | 21387919 | 39326328 | 6254263  | 10273865 |

|          |          |          |          |          |          |          |          |          |          |
|----------|----------|----------|----------|----------|----------|----------|----------|----------|----------|
| 418691.5 | 380610.8 | 13159.52 | 6187.471 | 10346.98 | 505268.7 | 1927618  | 842211.9 | 19176.98 | 202114   |
| 693877   | 237387.2 | 79691.08 | 35723.03 | 150973.7 | 250889.1 | 3596536  | 957831.7 | 589746   | 373612.2 |
| 9280847  | 7670421  | 3572936  | 21290016 | 12615850 | 7334491  | 5751875  | 4649403  | 5968617  | 22916993 |
| 154009.7 | 69913.47 | 141575.5 | 135359.4 | 148681.9 | 186971.4 | 187649.1 | 191701.1 | 122234.3 | 83816.51 |
| 314958.4 | 311221.7 | 85364.37 | 214472.3 | 402382.5 | 129287.6 | 593233.6 | 850135.2 | 280007   | 216829.8 |
| 180918.1 | 106827.2 | 59718.95 | 52368.01 | 106203.6 | 396102   | 370622.4 | 232645.8 | 45137.52 | 91334.09 |
| 399436.5 | 307285.9 | 44982.71 | 13144.91 | 395473.6 | 268397.2 | 1066981  | 578349.2 | 0        | 148876.2 |
| 273266   | 72303.94 | 305090.5 | 426813.7 | 377881.5 | 133451.3 | 180292.4 | 219839.1 | 246580.6 | 203988.5 |
| 1404560  | 665359.3 | 74965.68 | 366508.1 | 1754549  | 1409817  | 4103658  | 914919.3 | 2129112  | 2122550  |
| 201234.2 | 266672   | 49609.38 | 123303.5 | 326946.3 | 265750.1 | 358334.2 | 663563.3 | 2703.772 | 84677.28 |
| 5128899  | 3804045  | 2056137  | 639864.1 | 5391021  | 3215129  | 17388004 | 8633053  | 123112.9 | 2093215  |
| 2558197  | 1885626  | 157251   | 56527.91 | 613384.8 | 7063982  | 3504311  | 2965342  | 109290.7 | 1225371  |
| 307978   | 110396.2 | 230964   | 256705.3 | 246014.5 | 524857.9 | 345449.4 | 319175.2 | 287667.5 | 461327.9 |
| 611826   | 71738.64 | 478699.7 | 652573.7 | 573125.4 | 755090   | 549762   | 549821.3 | 556856.6 | 625400.4 |
| 247108.7 | 179355.5 | 53643.79 | 53802.66 | 63917.28 | 495091   | 455777.8 | 133989   | 237584.3 | 534222.9 |
| 242718.6 | 77288.88 | 211433   | 254536.4 | 169987.2 | 190054.5 | 347043.3 | 371103.9 | 218541.4 | 224920.4 |
| 114790.8 | 78954.22 | 18492.6  | 7014.373 | 113414   | 333628.1 | 161656.8 | 134319.6 | 0        | 108950.8 |
| 80450.15 | 30069.99 | 76075.98 | 64563.68 | 57762.75 | 97708.83 | 92583.36 | 84066.36 | 93372.36 | 49079    |
| 259450.2 | 233217.8 | 15007.09 | 0        | 25797.43 | 662899.3 | 444584   | 621735.6 | 23587.42 | 119958.2 |
| 974692.5 | 891319.8 | 18040.75 | 12354.32 | 30508.9  | 234257.8 | 3835017  | 2398863  | 89560.08 | 628035.7 |
| 729130.3 | 473234.1 | 92380.02 | 32947.09 | 211238.3 | 1972494  | 965919.8 | 740155.2 | 191417.6 | 592162.3 |
| 790822.2 | 835594.6 | 220114.2 | 114612.9 | 352132.5 | 2185888  | 620544.8 | 1357814  | 30130.26 | 19352.44 |
| 509609.9 | 230794   | 149817.5 | 237274   | 689037.7 | 521576.2 | 1126790  | 649973.6 | 148170   | 500306.5 |
| 44382812 | 21123084 | 51752840 | 66910678 | 26372616 | 34723727 | 31742340 | 74355071 | 51728419 | 41864323 |
| 465532.7 | 266042.5 | 312423.3 | 338841.2 | 218104.9 | 505554.9 | 1127338  | 798777.7 | 234256.5 | 302734.6 |
| 1.34E+08 | 1.62E+08 | 31547802 | 15947291 | 88311671 | 79866954 | 3.69E+08 | 3.47E+08 | 1600915  | 50992859 |
| 195037.4 | 130479.1 | 21966.42 | 8969.045 | 62495.46 | 449758.8 | 338606.6 | 179905.2 | 87666.09 | 51649.87 |
| 186200.1 | 115606.7 | 2162.849 | 5453.913 | 49562.42 | 582155.4 | 186401.9 | 322624.3 | 5500.294 | 170681.6 |
| 66383.56 | 55885.9  | 0        | 0        | 0        | 169991.7 | 123670.9 | 139538   | 0        | 31149.02 |
| 367453.8 | 208612.7 | 61178.03 | 89963.03 | 75243.77 | 565051.3 | 880909.1 | 590700.9 | 197702.7 | 320791.3 |
| 1317547  | 936918.8 | 58303.71 | 127733.7 | 1972727  | 643245.1 | 3156830  | 1925166  | 248085.4 | 1222123  |
| 1951066  | 1562788  | 59729.8  | 73535.27 | 535951.5 | 4436824  | 3638653  | 1282593  | 106140.2 | 1223734  |
| 3627131  | 4028768  | 13855.44 | 0        | 209909.1 | 2933193  | 12411868 | 9994308  | 3664.943 | 2473803  |
| 6049918  | 5681514  | 161032.7 | 958037.7 | 1689888  | 8044732  | 16025044 | 5445976  | 357449.6 | 1931468  |
| 583020.8 | 361932.5 | 571891.9 | 695556.3 | 115383.9 | 460413.8 | 1286399  | 667409.4 | 97526.03 | 440678.6 |
| 660310.8 | 502487.6 | 38661.97 | 51870.09 | 41653.96 | 1080772  | 1731736  | 964188.2 | 134241.5 | 519734.6 |
| 275021.6 | 171252.1 | 38621.62 | 18894.34 | 68374.58 | 556812.7 | 564624.1 | 282204.9 | 71743.42 | 166673.1 |
| 521436.3 | 327956.3 | 362537.6 | 354152.7 | 311547.5 | 766870.6 | 662925.3 | 989719.1 | 190123.9 | 384865.1 |
| 192904.6 | 132245.7 | 65065.23 | 56640.75 | 92514.8  | 418780.1 | 253196.8 | 265440.9 | 49060.47 | 61842.12 |
| 892637   | 815378.9 | 16938.82 | 11629.71 | 137297.5 | 1765230  | 2035009  | 1442220  | 82065.19 | 529445.1 |
| 464697.1 | 354663.3 | 160907.8 | 55013.08 | 755037.7 | 690713.9 | 481794.9 | 273903.9 | 134067.4 | 1059960  |
| 615657   | 372786.6 | 124085.7 | 60230.22 | 357127.5 | 1461134  | 1375276  | 766917.1 | 105919   | 364183.4 |
| 598770.3 | 332763.4 | 209065.4 | 220674.8 | 331120.6 | 1548914  | 941457   | 988989.2 | 170236   | 358702.6 |
| 801416.5 | 631787.3 | 55153.1  | 40591.75 | 1103806  | 477230.1 | 2836275  | 1367325  | 49459.52 | 183269.3 |
| 1298019  | 1106828  | 199370.4 | 291657.6 | 443756.2 | 1745427  | 3169934  | 1679064  | 201605.6 | 326110.8 |
| 13765017 | 22357028 | 109239.7 | 198307.8 | 1152972  | 8727557  | 47250017 | 53097524 | 55606.23 | 10723884 |
| 955013.9 | 588139.8 | 104169.2 | 154472.6 | 1221470  | 1359916  | 2354832  | 715580.4 | 50864.42 | 1264444  |

|          |          |          |          |          |          |          |          |          |          |
|----------|----------|----------|----------|----------|----------|----------|----------|----------|----------|
| 601120.9 | 649134.5 | 38361.76 | 7721.476 | 234720.4 | 1672155  | 694338.7 | 761418.9 | 110970.1 | 123019.5 |
| 67956222 | 75452734 | 43341.96 | 673461.7 | 2078480  | 84144903 | 2.08E+08 | 1.84E+08 | 362945.9 | 195002.1 |
| 6120809  | 3844364  | 1514451  | 1073991  | 4278981  | 14808832 | 11699420 | 8025405  | 845557.3 | 3263029  |
| 264183.3 | 251451.6 | 9858.642 | 0        | 9507.492 | 347726.7 | 1167391  | 494324.4 | 20038.85 | 110835.3 |
| 342991.4 | 44074.04 | 598166.9 | 191090.1 | 295019.6 | 405261.3 | 287462.7 | 337847.8 | 292130   | 314348.6 |
| 41259513 | 61216376 | 1046104  | 141231.1 | 364730.2 | 9159222  | 1.6E+08  | 1.45E+08 | 266955.4 | 4844124  |
| 131259.8 | 105552.6 | 6811.102 | 19012.95 | 14516.71 | 168258.4 | 375692.5 | 162309.1 | 13182.29 | 87981.97 |
| 580384.7 | 452372.5 | 107783.8 | 83993.49 | 263947.6 | 851897.8 | 1329111  | 646190.5 | 169739.3 | 719981.8 |
| 21544946 | 13506521 | 5194766  | 3237671  | 17651327 | 60745149 | 31112930 | 28605428 | 362954.3 | 15808407 |
| 448542.3 | 438581.4 | 0        | 0        | 3655.042 | 54740.91 | 1836404  | 653216.2 | 116438.2 | 305349   |
| 1169266  | 884891.2 | 2306.999 | 2405.596 | 111888.1 | 2040412  | 3063344  | 1982962  | 425459.7 | 970083.5 |
| 597671   | 684458.3 | 4221.605 | 13662.74 | 89395.3  | 513310.7 | 1966330  | 317186.1 | 36277.2  | 0        |
| 8155107  | 5534060  | 164300.8 | 77027.64 | 598477   | 12530042 | 23037527 | 13276292 | 1985673  | 6742865  |
| 402743.2 | 371130.8 | 30494.19 | 16639.04 | 50076.25 | 1052613  | 1119671  | 776044.2 | 86285.73 | 173176.1 |
| 7157792  | 5051341  | 855205.7 | 792734.3 | 6651765  | 18136315 | 12742725 | 7030871  | 730985.2 | 4248084  |
| 1637933  | 1672314  | 155564.8 | 521588   | 3021504  | 3465635  | 1849562  | 1057929  | 123844.1 | 380957.2 |
| 1008381  | 478452.2 | 306768.5 | 301040.3 | 673974.7 | 2216672  | 1930845  | 1426423  | 300612.7 | 734174.9 |
| 3035737  | 1774148  | 1489696  | 739099.7 | 1387541  | 6523232  | 3935026  | 3391620  | 650997.2 | 1839441  |
| 1230259  | 1254961  | 523751.9 | 841426.5 | 2989894  | 844615.3 | 1541593  | 3449577  | 352733.3 | 796409.3 |
| 1593185  | 2104091  | 1240228  | 1857202  | 396752.3 | 2466751  | 1163477  | 5322649  | 880250.9 | 401097.9 |
| 1203144  | 1025687  | 568726.9 | 118864.5 | 819393.6 | 3848304  | 1322732  | 2460932  | 58740.57 | 381712.2 |
| 879940.6 | 706964.7 | 92104.02 | 94045.64 | 122761.4 | 1813934  | 1842135  | 1985943  | 175713.1 | 368032.8 |
| 562579   | 428545.7 | 76852.27 | 41356.43 | 189948.6 | 1275157  | 967242.8 | 513309.7 | 36134.07 | 333291.4 |
| 245161.9 | 217478.2 | 29792.18 | 9111.331 | 89231.32 | 109969.4 | 1193632  | 608251.1 | 33898.13 | 160000.6 |
| 140084.2 | 69573.48 | 79577.2  | 183837   | 248429.9 | 113965.4 | 110276.5 | 92100.29 | 120301.8 | 252394   |
| 975863.2 | 253001.6 | 300307.9 | 564277.1 | 449870.2 | 2003589  | 1279526  | 1390072  | 760820   | 799479.7 |
| 312865.9 | 404173.5 | 129850.6 | 142122.2 | 117747.8 | 812793.8 | 549481.8 | 400938.5 | 33346.36 | 59001.91 |
| 98499.89 | 80602.51 | 20223.52 | 30911.12 | 53390.7  | 83962.42 | 257856.2 | 130615   | 14864.67 | 47879.35 |
| 1219612  | 864576.4 | 113626.2 | 58346.38 | 365580.7 | 2402545  | 2594187  | 1863100  | 148637.8 | 730159.4 |
| 165440.4 | 160893.5 | 194423.1 | 110308.8 | 283188.9 | 133185.4 | 170512.5 | 411377.6 | 18228.15 | 70139.82 |
| 198144.5 | 175719.5 | 164864.5 | 48482.77 | 208182.2 | 352516.1 | 293953.5 | 483937.6 | 40844.55 | 85736.25 |
| 338306.3 | 228402   | 440155.7 | 468529.9 | 419009.9 | 133100.9 | 126457.2 | 60257.6  | 173293.2 | 493509.9 |
| 72118.53 | 84976.6  | 7710.338 | 0        | 6969.353 | 118697.5 | 183927   | 54711.83 | 0        | 87076.96 |
| 245189.6 | 171117.4 | 50057.76 | 28576.6  | 101160.5 | 341999.5 | 596228.5 | 320666.3 | 48554.31 | 118309.2 |
| 78363.53 | 50580.44 | 4093.895 | 19155.34 | 113432.1 | 136418.1 | 149395.2 | 140973.3 | 0        | 75876.18 |
| 13151660 | 8920024  | 3100629  | 3726671  | 11645273 | 29500937 | 23124272 | 15982794 | 1757182  | 6333717  |
| 9447594  | 5809005  | 7222322  | 533566.4 | 2017238  | 25235649 | 16579020 | 6049599  | 2061986  | 17517180 |
| 2502497  | 2213743  | 0        | 2240.697 | 71711.5  | 6765057  | 7280992  | 2979512  | 13686.92 | 496942.3 |
| 2014521  | 1572169  | 345248.1 | 369838.8 | 666804.2 | 6693858  | 3145834  | 2111396  | 299982.9 | 658155.6 |
| 3447369  | 3062248  | 92248.24 | 108368.9 | 461049.3 | 6882319  | 7897122  | 4711274  | 42776.37 | 738546.6 |
| 558188.7 | 412799.7 | 184725.8 | 1135559  | 882817.7 | 456939.4 | 336226.4 | 275172.2 | 419675.2 | 1288829  |
| 181301.4 | 159615.3 | 0        | 3749.993 | 6737.401 | 161852.5 | 622095.5 | 242591.7 | 0        | 50732.88 |
| 134269.2 | 73286.45 | 30092.23 | 39216.41 | 74696.08 | 365537.8 | 105232.9 | 198101.2 | 10432.53 | 137739.7 |
| 231481   | 162831   | 24376.99 | 15282.07 | 59353.32 | 452107.9 | 501129.3 | 285218.8 | 38612.29 | 116616.8 |
| 3744763  | 755418.9 | 3014192  | 3731063  | 3619649  | 4615075  | 3401516  | 3344935  | 3243778  | 3379813  |
| 168861.3 | 140770.7 | 0        | 0        | 23951.1  | 266473.7 | 669590.6 | 333729.8 | 30052.99 | 45014.81 |
| 85394579 | 1.74E+08 | 35159328 | 22598793 | 41220908 | 10089254 | 4.04E+08 | 3.95E+08 | 28488494 | 3092879  |

|          |          |          |          |          |          |          |          |          |          |
|----------|----------|----------|----------|----------|----------|----------|----------|----------|----------|
| 111504.1 | 94424.79 | 10407    | 3202.316 | 30812.07 | 244006.7 | 215600   | 115696.2 | 6956.938 | 44518.21 |
| 229770.9 | 199325   | 0        | 0        | 0        | 50411.87 | 935088.3 | 322133.1 | 5419.11  | 81666.34 |
| 4174024  | 3662891  | 16828.45 | 3840.339 | 135413.6 | 1621525  | 22935479 | 10026316 | 289419.8 | 2152328  |
| 353282.2 | 327035.6 | 5830.449 | 0        | 48129.46 | 914259.2 | 1015577  | 569738.8 | 99781.07 | 197595.7 |
| 1405502  | 856841   | 1046709  | 1111571  | 372138.6 | 1080094  | 4003156  | 2276742  | 191940.2 | 1045286  |
| 1638781  | 1453431  | 370573.6 | 300232.3 | 1329077  | 4260575  | 2715641  | 930316.9 | 264005.5 | 999110.3 |
| 426961   | 316141.9 | 163761.9 | 162354.3 | 735273.6 | 551871.4 | 380224.8 | 757006.2 | 280279.3 | 268461.6 |
| 2664754  | 1952860  | 655031.5 | 538273.4 | 1968233  | 6081291  | 5222415  | 1871417  | 674819.5 | 1514229  |
| 386808   | 345298.4 | 53769.71 | 78876.28 | 211737   | 948122.7 | 835232.6 | 220324.1 | 57199.9  | 249115.8 |
| 261533.7 | 224746.7 | 24408.73 | 4849.979 | 102524.7 | 579696.5 | 473329.9 | 72709.99 | 30958.28 | 284404.8 |
| 1238511  | 838800.3 | 130252.4 | 96738.88 | 328797   | 3783278  | 2520222  | 1356245  | 219318.3 | 640608.6 |
| 2146161  | 1088973  | 384180.6 | 274902.5 | 1128463  | 4397030  | 3759624  | 2451587  | 521353.9 | 1628020  |
| 13543690 | 7005063  | 16209696 | 20981855 | 7674707  | 10057843 | 9675282  | 23403883 | 16329996 | 12679722 |
| 1245521  | 858792   | 112288   | 157116.3 | 497541.8 | 3230582  | 1674291  | 1838714  | 165463.9 | 467581.7 |
| 464041.9 | 369199.7 | 80325.62 | 105848.9 | 79689.74 | 242753.2 | 2159234  | 606936.5 | 12070.39 | 197591.6 |
| 404179   | 194302.7 | 192486.4 | 229557.1 | 117315.7 | 795556.6 | 825738.7 | 481942   | 173196.2 | 243131.1 |
| 502619.5 | 308119.2 | 99552.32 | 107700.3 | 297671.4 | 1347572  | 881168.1 | 672571.8 | 202229.2 | 390339.6 |
| 67708.9  | 60312.86 | 5010.216 | 10189.12 | 8195.943 | 288275.7 | 74283.47 | 63797.06 | 17507.35 | 0        |
| 3995458  | 4015066  | 236602.2 | 397334.4 | 996408.7 | 2996749  | 18412085 | 4602040  | 558385   | 739894.4 |
| 22629650 | 11336893 | 2989116  | 2431412  | 7392782  | 53206132 | 38085549 | 27106636 | 6252195  | 18361918 |
| 621325.7 | 696802.6 | 20448.86 | 13041.06 | 333888.7 | 315287.3 | 2045109  | 592202.3 | 82685.88 | 54968.39 |
| 246893.1 | 201300.4 | 2609.871 | 0        | 3712.299 | 0        | 1050135  | 478085.4 | 11382.21 | 71877.48 |
| 249171.7 | 162885.6 | 69077.64 | 37339.55 | 98011.85 | 417279.1 | 528549.5 | 315327.9 | 31133.48 | 127602.8 |
| 1798235  | 1127005  | 385428.2 | 343375.7 | 1230219  | 4529373  | 3251628  | 2425896  | 270184.8 | 923381.6 |
| 892473.8 | 608944   | 136320.1 | 219275   | 365814.5 | 2338071  | 1813053  | 884905.8 | 130106.8 | 464313.9 |
| 47703272 | 29503875 | 12377474 | 17057041 | 42363332 | 1.02E+08 | 81332981 | 63589637 | 7233600  | 26371205 |
| 817692.3 | 579016   | 96476.21 | 108739.5 | 455953.9 | 2133286  | 1674889  | 1129119  | 46478.82 | 375163.6 |
| 1094807  | 814415.5 | 71070.39 | 42813.85 | 1258484  | 1107665  | 3559586  | 2174604  | 29692.62 | 748604.6 |
| 778163.4 | 614670.8 | 332969.5 | 461076   | 350475.4 | 1985961  | 439569.5 | 1841475  | 564863   | 393830.8 |
| 140540.7 | 19082.81 | 75830.82 | 145974.5 | 124923.6 | 210393.9 | 127509.2 | 127680.8 | 122074.8 | 148537.1 |
| 1617831  | 981253.2 | 223942.5 | 176625   | 669591.2 | 3282790  | 3103959  | 1762661  | 261041.6 | 1027709  |
| 267681.1 | 268810.5 | 2864.842 | 10158.48 | 12279.19 | 818494.6 | 660362.1 | 232186.3 | 44718.59 | 53296.37 |
| 424512.6 | 540446.7 | 61171.17 | 20575.73 | 144541.7 | 870456.2 | 793338.7 | 76601.94 | 126824.6 | 505832.4 |
| 524145.8 | 550943.1 | 50905.97 | 93518.84 | 354220.1 | 126624.9 | 1693701  | 1497822  | 171553.7 | 349827.2 |
| 458093.5 | 452559.6 | 8779.559 | 3336.141 | 7083.991 | 75051.23 | 1873591  | 689767.3 | 65922    | 404731.7 |
| 10844128 | 6792160  | 236013.3 | 138659   | 862657.9 | 18022267 | 29786748 | 18693320 | 2960345  | 9473452  |
| 337269.2 | 482940.7 | 204789.3 | 259190.4 | 326432.5 | 174061.1 | 914108.4 | 75682.83 | 153851   | 70536.47 |
| 78692.67 | 77543.4  | 0        | 0        | 26724.72 | 177594.8 | 234314.7 | 59820.09 | 0        | 49499.08 |
| 339605.2 | 264159.9 | 0        | 0        | 0        | 140866.2 | 1340145  | 683235.2 | 47246.83 | 411861.2 |
| 747438.4 | 525849.6 | 47213.68 | 147314   | 170010.3 | 1450002  | 1611307  | 601495.9 | 128768.6 | 532924.5 |
| 224263.6 | 203654.6 | 26109.84 | 7284.952 | 134757.1 | 171993.1 | 669127.4 | 134378.9 | 24901.11 | 92113.14 |
| 7585151  | 4190652  | 4613084  | 437109.9 | 1324889  | 16682139 | 12131802 | 5186753  | 1462892  | 11195082 |
| 66063.68 | 52463.32 | 39593.11 | 56567.53 | 65016.81 | 58630.76 | 91769.36 | 48028.33 | 19397.47 | 43529.02 |
| 1.22E+08 | 1.69E+08 | 17451060 | 83664148 | 1.67E+08 | 92857.16 | 2.74E+08 | 4.07E+08 | 13378391 | 1292101  |
| 393164.7 | 90609.25 | 275987.2 | 448324.7 | 404832.4 | 405489.9 | 469937.4 | 444640.7 | 314222.1 | 325053.4 |
| 1022294  | 736256.4 | 492279.7 | 541056.5 | 464730.2 | 1841587  | 2134469  | 1705485  | 267082.8 | 614215.1 |
| 665106.3 | 448275.4 | 43559.57 | 288970.6 | 144624   | 1715228  | 1431945  | 751093.9 | 88420.75 | 365112.6 |

|          |          |          |          |          |          |          |          |          |          |
|----------|----------|----------|----------|----------|----------|----------|----------|----------|----------|
| 2129581  | 2949234  | 579358.8 | 101153.8 | 2498827  | 430397.6 | 5798004  | 7303047  | 176853.9 | 418371.2 |
| 205899.2 | 197765.9 | 16025.42 | 24158.34 | 11455.79 | 419257.5 | 459136.2 | 447583.8 | 8106.133 | 154788.7 |
| 665199.7 | 111234   | 678896.2 | 771073.5 | 732883.4 | 342723.5 | 732204.2 | 800827.5 | 737147.3 | 657361.8 |
| 203763.7 | 134446.4 | 24590.09 | 17693.67 | 126127   | 544046.9 | 222733.8 | 316661.4 | 28812.11 | 89280.95 |
| 395218   | 273864.6 | 74092.37 | 76697    | 214186.5 | 663679.1 | 804440.6 | 607467.3 | 32477.16 | 176282.6 |
| 1246931  | 2036586  | 103288.3 | 348077   | 323560.2 | 547514.1 | 4056257  | 4843028  | 107634.9 | 235225.8 |
| 109801.9 | 67756.08 | 12855.06 | 12388.3  | 65873.24 | 170812.1 | 246735.6 | 142651   | 5868.413 | 101914.5 |
| 192366.9 | 163015.7 | 53419.94 | 41544.29 | 33064.89 | 537261.1 | 208846.7 | 136663.3 | 13749.07 | 90175.49 |
| 236161.8 | 161346.8 | 113889.6 | 123713.1 | 123912.4 | 231732.9 | 682677.8 | 313315.4 | 95112.68 | 67175.16 |
| 323583.3 | 204776.8 | 62226.24 | 92909.73 | 501233.6 | 388432.3 | 681986.2 | 536555.6 | 7474.994 | 263555   |
| 1116849  | 810378   | 269301   | 277892.9 | 446174.9 | 1566837  | 2600966  | 2081303  | 191566.5 | 788919   |
| 330145.7 | 199635   | 404367   | 442335.4 | 374221.7 | 296810.9 | 51492.09 | 398203.6 | 120288.6 | 181685.5 |
| 234239   | 174704.7 | 99266.56 | 92528.31 | 71822.1  | 448723.4 | 551313.4 | 426141.5 | 14790.12 | 124926.8 |
| 264076.2 | 170189.1 | 15576.91 | 18559.78 | 14791.3  | 42272.41 | 1067200  | 527768.1 | 86258.78 | 181825.9 |
| 22983123 | 32932745 | 17913027 | 23677423 | 3278635  | 11984553 | 46196147 | 79816070 | 40747.11 | 19019323 |
| 765810.9 | 196214.4 | 465237.3 | 842196.4 | 816106   | 944511.2 | 674860.1 | 655227   | 797114.2 | 659341.3 |
| 1364662  | 797836.7 | 33651.72 | 28162.51 | 411456.6 | 3456609  | 3540680  | 1763483  | 419198.2 | 842618.9 |
| 390510.6 | 263519.9 | 61043.53 | 51773.38 | 121913.4 | 957549.5 | 934874.3 | 348922.4 | 39277.38 | 274915.9 |
| 775457.9 | 503403.3 | 70300.59 | 82602.79 | 422662.7 | 1536792  | 1480474  | 1333288  | 112161.4 | 397594.1 |
| 377041.9 | 288718.9 | 0        | 4028.062 | 3589.617 | 17764.84 | 1610243  | 618658.4 | 13293.05 | 201039.6 |
| 531753   | 712835.3 | 0        | 0        | 4004.297 | 1272326  | 1731974  | 766730.1 | 0        | 147472.7 |
| 317231.7 | 215956.8 | 53681.43 | 59848.09 | 269823.3 | 799795.9 | 526020.7 | 452839.3 | 27385.62 | 147494.6 |
| 449118.3 | 320915.7 | 37389.72 | 52553.23 | 164717.5 | 1335027  | 868516.1 | 632816.4 | 45579.66 | 288535.9 |
| 198206.9 | 156809.3 | 169361.5 | 70323.39 | 212948   | 156998.8 | 323468.3 | 291894.9 | 6618.857 | 154064.8 |
| 119172.2 | 124444.1 | 11437.17 | 2563.166 | 44901.38 | 268510.3 | 213036.4 | 108595.8 | 5769.732 | 70365.97 |
| 1327371  | 1433270  | 599220.4 | 362464.2 | 1309584  | 569774   | 3213856  | 3830259  | 1080595  | 584805.8 |
| 1075747  | 1845371  | 6481.589 | 0        | 0        | 281752.5 | 6119451  | 4344216  | 0        | 0        |
| 5293348  | 4358412  | 36489.03 | 25016.4  | 922854.2 | 6729613  | 16171153 | 7341693  | 426578.6 | 5144730  |
| 452253   | 278867.5 | 6997.486 | 2700.07  | 156572.5 | 1092734  | 1213268  | 682521.8 | 117844.9 | 260273.2 |
| 3585357  | 2806215  | 128238.4 | 118850.8 | 298233.2 | 7216226  | 8569664  | 6493072  | 987354.2 | 2285355  |
| 122686   | 102342.2 | 30980.66 | 23096.27 | 75140.07 | 254760.8 | 279784.2 | 280004   | 9942.016 | 57728.35 |
| 1606171  | 1212597  | 310277.8 | 234607.3 | 741751.6 | 5104474  | 2391105  | 2833101  | 281976.3 | 802155.2 |
| 358372.4 | 218964.3 | 175391.3 | 172208.4 | 235999.7 | 839330.3 | 480866.7 | 632600.7 | 135514   | 131966.8 |
| 325007.1 | 243397.2 | 89370.8  | 58121.19 | 178559.8 | 872866.5 | 559744.4 | 583479.2 | 58845.05 | 88524.75 |
| 563716.6 | 416767.9 | 183633.9 | 1162273  | 880130.5 | 449354.3 | 324084   | 233329.9 | 415201.8 | 1293149  |
| 255963.4 | 191417.3 | 44761    | 12446.13 | 117621.2 | 472860.3 | 534840   | 306639.7 | 25540.9  | 96041.76 |
| 8208422  | 9620548  | 1390213  | 194307.6 | 284323.8 | 1120426  | 32700713 | 25004875 | 5416415  | 6672821  |
| 1510140  | 1055096  | 194495.5 | 42109.68 | 154766.7 | 586299.1 | 5732495  | 3114890  | 612914.3 | 1782098  |
| 89529.97 | 67803.75 | 100780.1 | 150961.5 | 68534.92 | 51319.04 | 51231.92 | 166137.6 | 152481.6 | 70334.81 |
| 4113225  | 2576708  | 583598.4 | 1238879  | 2591405  | 3752371  | 10884892 | 2976733  | 1199448  | 5598505  |
| 9447302  | 5998837  | 2629686  | 1091927  | 4619624  | 19456028 | 16235561 | 8598702  | 1827095  | 5930126  |
| 1340591  | 1902092  | 42545.03 | 31148.33 | 15824.4  | 1030674  | 6652554  | 1557344  | 0        | 4559104  |
| 6019417  | 4521734  | 1256098  | 1525508  | 4473900  | 11717627 | 9124057  | 6504430  | 816764.4 | 2826571  |
| 104020.4 | 23489.49 | 43280.42 | 34089.82 | 31909.65 | 326912.8 | 124501.6 | 106316.3 | 75125.68 | 98263.4  |
| 810212.6 | 847634.6 | 128802.7 | 9235.571 | 246937.9 | 2337689  | 932069.1 | 1886246  | 78131.82 | 90152.88 |
| 416202.6 | 385894.5 | 201688.9 | 165928.8 | 212453.1 | 628643.4 | 727064.8 | 689325   | 45801.19 | 253884.2 |
| 4941723  | 7156750  | 233638   | 127361.5 | 898506.1 | 633962.4 | 19406634 | 17493974 | 0        | 3194892  |

|          |          |          |          |          |          |          |          |          |          |
|----------|----------|----------|----------|----------|----------|----------|----------|----------|----------|
| 1924551  | 1394187  | 248448.9 | 103488.4 | 637310   | 5384350  | 4127049  | 2620901  | 81150.78 | 1240664  |
| 10424545 | 7396571  | 937133.3 | 372230.8 | 3736879  | 19106129 | 23882400 | 15837395 | 846348.9 | 4215321  |
| 349890.5 | 470259   | 116355.1 | 47122.83 | 203984.6 | 1381969  | 222143.4 | 336931.7 | 8108.002 | 13373.73 |
| 691531.5 | 321468.6 | 100260   | 48984.71 | 310913.6 | 1468713  | 1296496  | 858458.8 | 223622.3 | 549209.4 |
| 826969.7 | 531945.7 | 55670.52 | 45181.91 | 104777.4 | 1256654  | 3114864  | 1129531  | 385913.1 | 1387053  |
| 101681.5 | 75435.81 | 16673.32 | 9132.916 | 50859.43 | 132339   | 260095.3 | 72876.1  | 8104.688 | 74811.17 |
| 281309.3 | 209881.5 | 39525.71 | 62462.59 | 123831.5 | 145320.9 | 906611.7 | 509264.9 | 46782.33 | 172986.6 |
| 262897   | 217501.3 | 276594.5 | 268776.2 | 73061.29 | 397671   | 223051.4 | 639791.5 | 180857.8 | 123880.8 |
| 269078.4 | 66879.41 | 83371.45 | 87471.08 | 107143   | 673194.2 | 481553.3 | 174850.6 | 299465.9 | 341325.2 |
| 133316   | 60775.29 | 91523.13 | 102448.6 | 112091.8 | 175031.3 | 209522.3 | 105634.1 | 67618.01 | 231420.4 |
| 1006663  | 942434.1 | 10520.49 | 15544.53 | 93411.28 | 2149786  | 2304805  | 1228879  | 8190.1   | 122640.5 |
| 3334218  | 1773718  | 889776.6 | 853426.6 | 3870601  | 2017106  | 7993602  | 1238835  | 2058915  | 3616371  |
| 1206174  | 1098389  | 0        | 7078.833 | 16258.5  | 3101367  | 3546421  | 1446730  | 4087.614 | 217073.9 |
| 2684496  | 1615760  | 1433648  | 1900628  | 1747999  | 4342612  | 4665978  | 3220959  | 857311.8 | 1125211  |
| 583485.8 | 516276.3 | 131227.3 | 152663.7 | 157122.6 | 2115508  | 659615.6 | 295927.8 | 1415591  | 600479.4 |
| 695456.9 | 650159.5 | 744126.9 | 753116   | 638619.2 | 386702.4 | 750781.6 | 1269020  | 56746.79 | 265006.4 |
| 466742.1 | 392938.2 | 167546.6 | 48683.81 | 916360.1 | 122545.4 | 1281906  | 371035.8 | 22486.17 | 196276.4 |
| 3054173  | 1156338  | 2420837  | 3780177  | 2842339  | 3352481  | 2486476  | 2398177  | 2427781  | 2616660  |
| 88165.01 | 71590.27 | 4830.364 | 0        | 39394.91 | 154525.8 | 207055.9 | 199588.9 | 4510.698 | 56452.25 |
| 122523.6 | 73363.68 | 20609.72 | 40661.37 | 45777.34 | 254294.6 | 296403.2 | 143141.4 | 22388.22 | 81128.91 |
| 31295517 | 52107846 | 6710043  | 4179694  | 9568595  | 1.08E+08 | 8184505  | 24003128 | 1079367  | 4357953  |
| 225533.2 | 160505.1 | 51050.4  | 131909.1 | 153453   | 457958.7 | 404513.7 | 443014.6 | 94608.08 | 63966.53 |
| 307360.6 | 204515.2 | 39261.71 | 55236.97 | 85131.78 | 682789.6 | 563882.4 | 439157.4 | 50647.02 | 146931.7 |
| 1185192  | 851947.8 | 17826.83 | 9738.933 | 93848.66 | 2077042  | 3218997  | 1781913  | 297946.7 | 958458.8 |
| 279338   | 253766.8 | 0        | 20997.74 | 26524.82 | 219483.7 | 984362   | 405226.3 | 32305.83 | 42875.49 |
| 2.83E+09 | 2.76E+09 | 2.34E+09 | 1.19E+09 | 6.09E+09 | 9.28E+08 | 4.64E+09 | 6.97E+09 | 8304397  | 4.14E+09 |
| 2684749  | 1668703  | 729177.9 | 561129.9 | 1430904  | 5940907  | 5703047  | 3443608  | 588149.2 | 1678928  |
| 1288092  | 901788.9 | 239105.9 | 99059.18 | 775004.5 | 2407349  | 2486531  | 1689767  | 136895.9 | 863325   |
| 750120.6 | 554883.3 | 49290.74 | 20578.49 | 164148.4 | 806519.7 | 3138772  | 1365550  | 210512.9 | 1203120  |
| 4296051  | 3120689  | 195714.4 | 175091.9 | 637300.3 | 9044510  | 9701655  | 6939048  | 997150.2 | 2667998  |
| 524105   | 417067.6 | 107537.5 | 60358.87 | 361902.7 | 365866.7 | 1992509  | 985629.6 | 64103.7  | 124581.7 |
| 453584.7 | 332683.6 | 252255.4 | 51634.8  | 401830.7 | 529606.4 | 898016.1 | 934658.3 | 152298.3 | 177055.4 |
| 114430.4 | 68171.43 | 115125.3 | 122451.7 | 111716   | 146220.1 | 54133.46 | 125162.3 | 38957.29 | 68059.64 |
| 66232.42 | 47248.04 | 36167.33 | 34285.3  | 35117.78 | 117111.6 | 128108.9 | 52279.34 | 14870.9  | 58987.59 |
| 919464.9 | 550200.8 | 202314.9 | 309495.3 | 435345.2 | 1465688  | 1907995  | 785699.2 | 247936.2 | 863996.5 |
| 578728.1 | 438999.2 | 53473.66 | 98403.43 | 219213.8 | 1235051  | 1078178  | 744650.7 | 55369.62 | 192786.7 |
| 523096.5 | 140077.7 | 185508.1 | 114636   | 296190   | 1211655  | 667383.7 | 582797   | 330419.9 | 448219.9 |
| 476651.1 | 435553.8 | 7553.018 | 2291.015 | 30422.22 | 167145   | 2525362  | 410932.3 | 375148.2 | 1221909  |
| 67784676 | 37633867 | 9007416  | 5389067  | 32816014 | 1.81E+08 | 86985974 | 1.07E+08 | 12535264 | 49245768 |
| 128891.4 | 118474.4 | 90191.44 | 81608.78 | 80093.74 | 290308.1 | 145048.7 | 141147.6 | 29684.98 | 27708.64 |
| 474204.4 | 320488.2 | 46808.45 | 13826.98 | 171875.1 | 1046656  | 919854.6 | 434750.4 | 38132.26 | 343526   |
| 9462649  | 8831044  | 5691344  | 26093.3  | 36362810 | 3187879  | 7007832  | 2672266  | 366576.7 | 16753344 |
| 5447832  | 8037196  | 2825554  | 2446461  | 11268708 | 2446484  | 5669995  | 19662735 | 43570.38 | 1848033  |
| 2367092  | 1148805  | 773571   | 409973.7 | 1588552  | 5656875  | 2711625  | 2571935  | 554176.4 | 2070556  |
| 116739   | 108707.3 | 4286.412 | 13295.42 | 66703.59 | 192970.5 | 261312.1 | 78050.83 | 0        | 48538.05 |
| 1521908  | 997745.8 | 448641.2 | 183637.4 | 775126.9 | 3745036  | 3006196  | 1441838  | 247116.1 | 898599.9 |
| 63065.52 | 36026.26 | 29624.8  | 21734.82 | 27921.31 | 113068.3 | 142232.3 | 86575.68 | 4657.784 | 59396.09 |

|          |          |          |          |          |          |          |          |          |          |
|----------|----------|----------|----------|----------|----------|----------|----------|----------|----------|
| 164796.4 | 126958.8 | 9593.872 | 0        | 30151.25 | 424750.1 | 292617.3 | 313838.4 | 4882.404 | 63379.11 |
| 4928145  | 6103007  | 100167.8 | 153918.6 | 1850130  | 251148   | 19309781 | 14435687 | 0        | 1696559  |
| 1614107  | 597308.5 | 691573.5 | 505579.2 | 756511.4 | 2833927  | 2891757  | 1288039  | 2605855  | 1050651  |
| 367595   | 365813   | 15286.28 | 0        | 58320.05 | 302908.6 | 1696409  | 525436.2 | 109469   | 222057.2 |
| 10129438 | 6450593  | 3773063  | 6455062  | 4271176  | 15826807 | 23382471 | 19336224 | 4260635  | 4743598  |
| 293569.3 | 285432.6 | 2822.499 | 2256.952 | 27070.42 | 573802   | 731907.6 | 551663.4 | 38906.11 | 166127.9 |
| 803739.7 | 503746.4 | 169806.7 | 56289.67 | 346418.9 | 1487146  | 1694782  | 830271.9 | 201701.8 | 406287.9 |
| 152681.9 | 124413.3 | 9560.718 | 5999.652 | 47685.88 | 364913.9 | 275955.4 | 309570.3 | 8705.788 | 47410.62 |
| 477776.1 | 212098.4 | 214665.7 | 204964.3 | 323072.2 | 956726.2 | 807145.3 | 606820.6 | 174353.9 | 334960.8 |
| 21064185 | 13398848 | 4988996  | 4845491  | 14789048 | 49356698 | 38238600 | 26729411 | 3057393  | 10864401 |
| 70880.92 | 57795.61 | 6906.811 | 0        | 6677.429 | 14029.65 | 377136.3 | 131358.8 | 64754.44 | 31682.49 |
| 428365.6 | 286731.2 | 48705.63 | 76899.2  | 119666.9 | 1161169  | 577273   | 616457.3 | 72388.44 | 218996.1 |
| 624986.6 | 746844   | 130279.6 | 137196.3 | 227215.5 | 1425616  | 1494653  | 1953530  | 181017.3 | 401660.7 |
| 29247467 | 38603388 | 24124212 | 4784666  | 49706048 | 6559917  | 48494736 | 93197269 | 102675.6 | 37866565 |
| 3471101  | 2445238  | 413898.1 | 342993.5 | 1004264  | 5173539  | 12002478 | 2807978  | 413828.8 | 2213745  |
| 184061.6 | 126527.2 | 74442.61 | 73467.35 | 68790.7  | 381681.9 | 381257.8 | 251656.7 | 31219.79 | 95859.22 |
| 236814   | 197764.5 | 40588.86 | 47725.82 | 91910.76 | 621560.5 | 293694.3 | 318606.1 | 18185.99 | 62415.58 |
| 1584611  | 597960.3 | 184799.5 | 316024   | 710232.2 | 1739154  | 4442297  | 1820913  | 1706597  | 1090053  |
| 3897895  | 6695272  | 1020164  | 1084631  | 2359180  | 14379891 | 3090311  | 15867754 | 531971.4 | 1034451  |
| 144161.2 | 110013.4 | 23720.34 | 33049.14 | 47777.79 | 298671.2 | 268589   | 272266.6 | 12167.69 | 75731.75 |
| 269746.7 | 193792.6 | 20064.65 | 2621.749 | 73233.13 | 844615.6 | 526511.9 | 379123.1 | 20747.29 | 100901.3 |
| 120892.5 | 72102.07 | 52693.76 | 50636.56 | 64022.33 | 273675.7 | 130381.6 | 187021.2 | 10733.75 | 86515.01 |
| 204914.8 | 152449.5 | 28554.06 | 44082.51 | 38100.13 | 580418.6 | 417298.3 | 291694.3 | 16794.84 | 84646.07 |
| 2521912  | 1889935  | 847762   | 201102.4 | 2946443  | 824394.3 | 6868363  | 3933146  | 899933.8 | 1216918  |
| 208069.6 | 172705.5 | 37641.79 | 35749.53 | 57875.82 | 407396.7 | 427717.5 | 218428   | 23526.38 | 128305.2 |
| 374511.2 | 219836.5 | 152292.7 | 149081.8 | 211168.1 | 1172924  | 323317.1 | 409873.1 | 95394.72 | 625804   |
| 116058.3 | 127310.7 | 0        | 0        | 0        | 31971.63 | 480046.4 | 296734.3 | 0        | 75007.44 |
| 692650.1 | 488754   | 211117.3 | 71522.81 | 294731.7 | 123896.6 | 2448570  | 1160121  | 42744.22 | 507328.3 |
| 1272627  | 851017.3 | 326279   | 319499.2 | 976319.8 | 2809492  | 2324178  | 1470036  | 165937.1 | 636396.1 |
| 713264   | 458136.5 | 28550.8  | 20720.05 | 87123.43 | 1123532  | 2647926  | 999295.9 | 411138.8 | 1283138  |
| 75076.64 | 72495.72 | 42514.09 | 55836.55 | 63830.94 | 148588.8 | 87507.34 | 123930.3 | 11890.11 | 11110.74 |
| 629421   | 716538   | 502137.9 | 670029.4 | 1493857  | 359581.6 | 355466.9 | 1477319  | 48145.5  | 1336140  |
| 722164.4 | 353791.1 | 314275.4 | 177265.8 | 392121.2 | 1761009  | 766311.6 | 600627.9 | 322851.9 | 509263.8 |
| 957237.7 | 718007.5 | 124885.4 | 1686466  | 774834.4 | 858685.2 | 1094215  | 998872   | 327945.8 | 875100.9 |
| 356237.7 | 139473.8 | 58101.25 | 40963.05 | 78657.41 | 974344.5 | 510509.8 | 524121.1 | 152766.7 | 439301.4 |
| 329775.7 | 268669.2 | 16920.46 | 12955.18 | 13103.34 | 34347.48 | 1802671  | 544113.8 | 0        | 77501.05 |
| 502418.4 | 340035.8 | 445162.1 | 162244.1 | 154615.5 | 819240.9 | 804030.3 | 534498.2 | 40030.57 | 300903.2 |
| 787430.7 | 698753.1 | 119119.8 | 116419.2 | 491705.7 | 1648746  | 1295340  | 1882751  | 54373.71 | 338162.3 |
| 411040.5 | 488605.3 | 35054.23 | 23251.89 | 139489.2 | 1940871  | 176283.5 | 403577.9 | 158807.6 | 100828.7 |
| 1229159  | 1218367  | 0        | 56053.24 | 4168433  | 305953.8 | 1040130  | 1897112  | 53708.12 | 170536.5 |
| 467321.8 | 301451.9 | 79101.69 | 35919.85 | 253781.3 | 1300424  | 836179.4 | 445811.6 | 60107.7  | 334351.1 |
| 110155.7 | 65934.78 | 110955.6 | 59451.21 | 110498   | 140011   | 150005.6 | 34937.06 | 94848.58 | 211832.2 |
| 3430336  | 2221409  | 90185.56 | 55380.48 | 935995.3 | 12822222 | 4840138  | 3817573  | 465524.5 | 2743564  |
| 855665   | 550466.8 | 152139.3 | 135967.7 | 177689.7 | 1958519  | 2172551  | 1028849  | 123103.8 | 556116.9 |
| 170201.8 | 133295   | 19343.29 | 5748.697 | 31030.78 | 502044.7 | 364212.9 | 211425.6 | 15841.24 | 77725.46 |
| 1091211  | 673355.6 | 125407.3 | 110408.9 | 103272.9 | 458102.5 | 5303224  | 1296991  | 169024.4 | 643865.4 |
| 10468265 | 12954824 | 409464.8 | 0        | 1516473  | 5717455  | 39097682 | 7989979  | 3592.705 | 1678639  |



|          |          |          |          |          |          |          |          |          |          |
|----------|----------|----------|----------|----------|----------|----------|----------|----------|----------|
| 353206.6 | 216380.1 | 130560.8 | 133593.2 | 157752.2 | 588474.9 | 664817.7 | 406695.4 | 80665.12 | 184314.7 |
| 476121.5 | 354484.6 | 35585.58 | 161293.6 | 225094.7 | 971014.1 | 1152219  | 520638.6 | 62870.2  | 277778.9 |
| 1261611  | 935958.1 | 97056.05 | 10616.99 | 297182.3 | 3728994  | 1686817  | 1481525  | 49944.88 | 555064   |
| 211138.3 | 359773.8 | 255816.6 | 284347.1 | 24690.96 | 305540.5 | 83315.86 | 847878.6 | 132119.8 | 5394.56  |
| 634483.9 | 347876.8 | 86884.33 | 256717.1 | 550826.9 | 1140919  | 1305152  | 551770.4 | 311948.3 | 430075.5 |
| 472659.7 | 318546.5 | 89293.2  | 11718.56 | 200592.6 | 1282885  | 951669.1 | 823032.1 | 190221.9 | 357942.4 |
| 25516255 | 19190968 | 12881012 | 5215666  | 33187820 | 46971928 | 36061663 | 43433561 | 4736467  | 16094881 |
| 216109.2 | 267231.6 | 109954.3 | 120395.3 | 465239.7 | 206321.2 | 97645.09 | 678350.3 | 0        | 84810.23 |
| 21704836 | 13996320 | 3298090  | 4053804  | 15013799 | 56042870 | 23379581 | 30844415 | 1715243  | 12150396 |
| 4147720  | 2782073  | 72296.75 | 67440.74 | 349971.6 | 7016340  | 11662588 | 7513017  | 1034916  | 3540604  |
| 163551.8 | 137203.2 | 10813.11 | 5942.102 | 54742.19 | 397523.1 | 289807.4 | 335097.5 | 4881.496 | 46331.74 |
| 233593.4 | 179865.4 | 12856.74 | 18296.42 | 51980.13 | 709725.1 | 284325.1 | 306196   | 27200.27 | 94142.05 |
| 221253.6 | 165319.6 | 110445   | 75311.35 | 111189.1 | 679399.8 | 208390.7 | 111058   | 31250.41 | 183656   |
| 192627.4 | 138916.6 | 43748.22 | 57320.46 | 84868.28 | 511763.2 | 203118   | 73684.54 | 59496.08 | 172784.9 |
| 251450.2 | 255594.5 | 0        | 0        | 24397.89 | 374963.3 | 749829.4 | 449107.3 | 23127.14 | 125821.3 |
| 84497.33 | 84432.7  | 105751.3 | 151023.6 | 57930.16 | 52496.55 | 30037.21 | 197927.2 | 148926.7 | 37722.38 |
| 1023282  | 637622.7 | 280913.6 | 293884.1 | 88363.73 | 1293364  | 3574807  | 1278836  | 528492.5 | 1615605  |
| 3759804  | 2478720  | 570732.2 | 210542.3 | 1238776  | 7872177  | 7709390  | 3337296  | 758273.9 | 2351101  |
| 2.28E+08 | 2.26E+08 | 4921470  | 3286111  | 76493863 | 74850612 | 8.7E+08  | 3.47E+08 | 1190729  | 47283968 |
| 285884.8 | 208332.6 | 26301.62 | 5860.546 | 77340.53 | 675964.6 | 545750.4 | 359782.4 | 41339.83 | 113503.3 |
| 114418.8 | 98191.07 | 95694.86 | 123950.4 | 84422.01 | 205381.8 | 32618.03 | 84918.78 | 46820.55 | 19699.76 |
| 15230877 | 10990012 | 511851.7 | 314236.4 | 2886952  | 31284244 | 35800631 | 25886215 | 3452534  | 8397606  |
| 629421.3 | 337150.5 | 171624.7 | 107133.4 | 376677.7 | 1289809  | 1040064  | 837757.1 | 40980.47 | 651142.9 |
| 233069.8 | 179790.9 | 20198.16 | 5715.926 | 46033.96 | 694093.4 | 493503.4 | 428490.6 | 12957.47 | 76042.92 |
| 862424.5 | 587523.7 | 77492.17 | 197628.6 | 193133.9 | 2537751  | 1000326  | 862377.9 | 111947.6 | 498294.3 |
| 495192.1 | 475935.6 | 15255.87 | 6095.979 | 25423.81 | 906049   | 1324227  | 482991.1 | 0        | 48596.34 |
| 153365.3 | 115649.6 | 0        | 4074.976 | 10189.8  | 302053   | 393603.1 | 236439.3 | 11049.97 | 79691.15 |
| 32858777 | 35241583 | 35687257 | 16100327 | 42931360 | 6139201  | 53157550 | 87424233 | 646555   | 16411291 |
| 1965346  | 342779.5 | 1563901  | 2191798  | 2451220  | 1591113  | 2160841  | 2491496  | 1781236  | 1597629  |
| 1451338  | 689812.4 | 148827.4 | 105909   | 244094   | 689520   | 6850159  | 1586548  | 634806   | 2111525  |
| 4166060  | 3597930  | 335814.4 | 277101.1 | 988078.1 | 4505205  | 13073106 | 9467014  | 42544.29 | 4193348  |
| 884788.7 | 410975.9 | 99655.49 | 1194558  | 351061.9 | 1194933  | 1403855  | 1092830  | 641828.8 | 292926.9 |
| 171845.2 | 107860.5 | 100856.4 | 109453.1 | 65428.19 | 378194.5 | 247886.6 | 173052.7 | 41737.04 | 168102.9 |
| 3.38E+08 | 1.97E+08 | 58721374 | 31755776 | 1.48E+08 | 6.98E+08 | 6.56E+08 | 3.31E+08 | 65724078 | 2.52E+08 |
| 37485872 | 19910268 | 18683456 | 11457743 | 36709585 | 73010174 | 55666560 | 44369407 | 4589316  | 34902147 |
| 445453.8 | 271429.8 | 194264.2 | 210598.3 | 161502.9 | 1037709  | 743863.9 | 449424.5 | 173020.7 | 176728   |
| 162201.7 | 157956.1 | 36308.96 | 383076   | 273921.3 | 108358.5 | 63376.47 | 54136    | 93548.22 | 441675.4 |
| 516684.6 | 171087.2 | 204575.2 | 644480.4 | 442090.7 | 361268   | 854774.6 | 224342.5 | 627482.2 | 533198.2 |
| 23691702 | 19630221 | 624669.8 | 123638.2 | 1222639  | 4604762  | 99787089 | 52233226 | 5061176  | 16718505 |
| 207248.6 | 237196.7 | 0        | 2157.643 | 142844.7 | 750073.5 | 237985.8 | 567188   | 11272.45 | 79595.86 |
| 5443867  | 4036239  | 194101.5 | 74326.49 | 2366509  | 8514079  | 14248386 | 10165125 | 1284346  | 4424301  |
| 861029.6 | 967460.1 | 13557.64 | 13030.89 | 28693.22 | 1943261  | 2704170  | 1173801  | 13867.97 | 304510.3 |
| 438135.4 | 489909.2 | 33768.57 | 0        | 105987   | 1257741  | 614670.8 | 542454.9 | 62598.33 | 46614.07 |
| 471216.8 | 272678.2 | 125499   | 72177.57 | 87114.35 | 155290.9 | 2154744  | 650391.4 | 0        | 660405.3 |
| 515662.3 | 650885.8 | 412006.1 | 989584.5 | 150159.3 | 803522.4 | 404057.8 | 1665217  | 259422.4 | 160556.6 |
| 191337.8 | 176864.8 | 14741.06 | 3430.479 | 43351.52 | 282905.6 | 696999.3 | 497257   | 44999.55 | 170047.8 |
| 7635795  | 12659420 | 80842.13 | 56343.59 | 3768384  | 4412403  | 25803722 | 29729705 | 168200.3 | 390308.2 |

|          |          |          |          |          |          |          |          |          |          |
|----------|----------|----------|----------|----------|----------|----------|----------|----------|----------|
| 981301.6 | 869370.7 | 1120684  | 718167.5 | 1902671  | 135116.7 | 1296280  | 1857184  | 175578.1 | 638170.8 |
| 1431312  | 1166378  | 6266.387 | 0        | 0        | 3653676  | 2965911  | 2227037  | 473273.7 | 1419717  |
| 572372.6 | 541388.7 | 17877.82 | 2355.531 | 78126.51 | 344085.8 | 2739757  | 1070322  | 79773.34 | 298905.6 |
| 3291099  | 666048.1 | 832540.2 | 3342297  | 3130147  | 4830353  | 3920540  | 4169266  | 3182849  | 3180693  |
| 328511.1 | 346776   | 5320.315 | 2561.646 | 4063.807 | 822893.9 | 952503.7 | 571217.9 | 21159.72 | 152253.5 |
| 566350.7 | 560572.7 | 5214.751 | 0        | 34608.06 | 598440   | 1948733  | 937006.1 | 36122.15 | 419836.2 |
| 103891.2 | 50181.6  | 59756.57 | 76474.94 | 49964.01 | 166143.5 | 149433.6 | 97932.57 | 68876.44 | 111279   |
| 527485.2 | 484433.8 | 26699.24 | 42091.67 | 40957.59 | 1263061  | 1477437  | 586748   | 18764.65 | 209833.7 |
| 835930.9 | 818185.2 | 10927.93 | 4665.389 | 20984    | 167330.9 | 3546790  | 1307797  | 209723.9 | 557557.8 |
| 975501.2 | 686396.9 | 117075.7 | 135889.3 | 471100.9 | 3074317  | 1425253  | 1626308  | 92269.17 | 403988   |
| 317928.9 | 290427.1 | 11090.28 | 9706.612 | 44143.86 | 165461.4 | 1214956  | 511599.8 | 69314.62 | 113933.2 |
| 2862467  | 2459972  | 77679.19 | 45131.15 | 44927.49 | 1670280  | 11159937 | 7099671  | 778362.9 | 1663999  |
| 38178136 | 23591200 | 6431438  | 4951291  | 20216693 | 89355568 | 81458193 | 61502075 | 5766475  | 23465162 |
| 198888.6 | 132288.5 | 26264.56 | 52041.48 | 130164.4 | 393696.7 | 340945.8 | 211622.9 | 26435.67 | 119045.6 |
| 78562.38 | 49137.34 | 34917.5  | 4765.497 | 52195.14 | 113631.1 | 210187.5 | 141989.2 | 11027.66 | 66435.43 |
| 244722.6 | 119603.2 | 9144.102 | 8683.816 | 36973.12 | 813406.7 | 447594.1 | 307954.5 | 85419.89 | 172373.3 |
| 1068558  | 701943   | 214366.5 | 56275.37 | 462880.6 | 2771232  | 2182491  | 969808.2 | 194842.1 | 651253.1 |
| 371858.6 | 250402.7 | 91297.78 | 109779   | 237954.6 | 720488.3 | 608494.3 | 273826.9 | 59814.82 | 274326.7 |
| 1156438  | 1405831  | 300853.3 | 344803.8 | 357664.2 | 1618377  | 2738925  | 345929.8 | 249353.5 | 1168286  |
| 545373   | 644878.6 | 266959.9 | 52206.09 | 687562.4 | 178509.1 | 1344342  | 1667739  | 93688.94 | 160175.2 |
| 22028954 | 13167710 | 5409483  | 4103531  | 14925394 | 50890800 | 40783140 | 29033082 | 3556355  | 12702900 |
| 1554334  | 891918.5 | 984702   | 83822.96 | 277211.5 | 3510729  | 2503553  | 989919.8 | 282646.4 | 2378700  |
| 1979766  | 1187419  | 487944.4 | 573485.3 | 1038205  | 3566416  | 3755082  | 2089148  | 358505.5 | 1303673  |
| 190417.8 | 145609.8 | 7946.542 | 0        | 65556.72 | 528485.6 | 418715.7 | 150649.3 | 5727.855 | 118516.6 |
| 5035956  | 2930657  | 1820681  | 1160838  | 4711831  | 11314449 | 7375744  | 5690434  | 355633   | 4393310  |
| 2646202  | 3455964  | 1041099  | 135814.5 | 2623211  | 2035344  | 6403643  | 8686538  | 347090.1 | 2283724  |
| 30014239 | 28485410 | 5312936  | 2882210  | 19755056 | 34840689 | 98673674 | 18515596 | 4014153  | 10115849 |
| 91508    | 47838.69 | 83714.17 | 93972.83 | 96377.73 | 56362.72 | 114674.4 | 104726   | 71431.59 | 57462.45 |
| 891099.5 | 644087.8 | 123897.4 | 53120.94 | 344521.7 | 1863765  | 1807213  | 688700.9 | 143904   | 582508.3 |
| 143004.1 | 91270.04 | 17282.59 | 11438.37 | 75196.32 | 296467.7 | 275534.4 | 132423.8 | 27211.45 | 92970.55 |
| 9782112  | 9579032  | 2021160  | 180443.1 | 8259947  | 9616961  | 32575303 | 9328595  | 615816.5 | 5106399  |
| 265119.1 | 47285.75 | 213552   | 356423.5 | 179709.9 | 294874   | 261638.6 | 248344.8 | 220958.4 | 232027.1 |
| 340217.9 | 218246.7 | 48721.9  | 52317.61 | 129441   | 808015   | 567552.2 | 295210.9 | 85280.43 | 198766.5 |
| 163122.3 | 85941.38 | 15277.2  | 18630.34 | 22234.57 | 361472.4 | 452243.7 | 201061.7 | 25753.63 | 133537.6 |
| 189558.7 | 116115.9 | 35494.21 | 13170.06 | 150198.1 | 419694.8 | 380984.1 | 281241.7 | 5432.912 | 143931.2 |
| 372882.9 | 305113.7 | 0        | 2487.196 | 21658.34 | 857117.1 | 1128764  | 396681.7 | 44729.43 | 193833.4 |
| 802908   | 482534.3 | 193209.4 | 206335.4 | 394306   | 1896634  | 1542430  | 1023116  | 139319.5 | 494379.6 |
| 154767.3 | 110929.9 | 22194.4  | 51206.54 | 56005.6  | 29442.03 | 555405.7 | 208769.9 | 11058.16 | 61618.74 |
| 15382518 | 9896183  | 3767702  | 2003657  | 7698253  | 33243288 | 26232227 | 12917237 | 3000012  | 10050163 |
| 125954.9 | 104869.1 | 52500.77 | 42847.93 | 57006.79 | 226590.2 | 286285.5 | 196865.1 | 23908.05 | 35821.13 |
| 657988.5 | 376329.6 | 307358.4 | 249258.6 | 104108.7 | 1026942  | 1786057  | 836373.2 | 85472.07 | 574288.6 |
| 359430.9 | 206035.3 | 146162.2 | 214128.1 | 511301.3 | 345069.1 | 519924.3 | 464125   | 89093.84 | 190199.4 |
| 6848410  | 8658094  | 5394704  | 670952.1 | 2042687  | 13184568 | 10624984 | 22034619 | 489265.2 | 5137725  |
| 7241055  | 9765077  | 2813860  | 3797726  | 13357405 | 3083699  | 15794028 | 24439880 | 85483.62 | 3701967  |
| 568673.7 | 311361   | 638846.5 | 70347.56 | 143767.6 | 662288.1 | 1202459  | 677493.5 | 474049.7 | 378531.9 |
| 377390.2 | 308123.1 | 0        | 0        | 20587.43 | 696001.5 | 1039575  | 652803.9 | 72955.56 | 348721.5 |
| 136825.1 | 144027.6 | 5969.211 | 3241.753 | 52716.15 | 159001.2 | 412654.9 | 171761   | 17622.34 | 70071.57 |

|          |          |          |          |          |          |          |          |          |          |
|----------|----------|----------|----------|----------|----------|----------|----------|----------|----------|
| 1485700  | 293824.1 | 1085124  | 1262829  | 1566657  | 1695953  | 1917853  | 1802776  | 1158292  | 1228811  |
| 34108084 | 21935021 | 8380578  | 7024279  | 20775285 | 70301116 | 55915358 | 38540144 | 5721660  | 18814979 |
| 866560.8 | 1012703  | 906514.6 | 444521.4 | 3034199  | 253079.1 | 48681.16 | 2648444  | 125606.9 | 451763.5 |
| 123504.9 | 94867.2  | 38789.4  | 42348.87 | 42013.55 | 190180.5 | 272029.5 | 134396.5 | 4629.616 | 66692.61 |
| 1243749  | 1634026  | 3764.859 | 2435.541 | 16062.53 | 1789553  | 3877896  | 1001246  | 84584.16 | 598412.1 |
| 823822.4 | 445162.9 | 220736.1 | 101005.2 | 485097.9 | 1348384  | 1770595  | 801597.8 | 183587.2 | 697625.3 |
| 1266717  | 1230411  | 6447.025 | 0        | 509327.4 | 739975   | 4564470  | 2379701  | 107179.5 | 1057717  |
| 4343747  | 3078054  | 179495.5 | 104369.6 | 338139.2 | 3878876  | 15566720 | 8803386  | 1079269  | 4046049  |
| 231963.8 | 157405.7 | 75890.26 | 71221.94 | 61429.17 | 1024198  | 30908.07 | 298202.7 | 97006.54 | 250395.1 |
| 927102.6 | 565836.5 | 219665.6 | 114203.5 | 329876.7 | 1887912  | 1846105  | 930149.5 | 167524   | 641391.7 |
| 19437783 | 17734227 | 735291.4 | 613220.7 | 20779287 | 9916108  | 72930801 | 14219025 | 54676.23 | 10015410 |
| 622850.1 | 106304.6 | 434621.7 | 603502.1 | 628306.6 | 760852.9 | 651941.5 | 705444.2 | 495018.6 | 545183   |
| 275782.8 | 232331   | 42107.11 | 33255    | 78457.55 | 936738.3 | 388668.3 | 288336.7 | 0        | 109071   |
| 79544.54 | 65294.66 | 22473.42 | 30163.35 | 37249.89 | 217357.1 | 67486.34 | 169487.2 | 15947.19 | 19620.69 |
| 4948208  | 3607523  | 1016421  | 500870.6 | 2578708  | 11272942 | 10798508 | 3553665  | 867975.5 | 3501928  |
| 1344650  | 933891.4 | 185067.8 | 58168.67 | 463472.5 | 2876237  | 2764697  | 1219077  | 229876.3 | 797140.6 |
| 1916548  | 1340153  | 462999   | 844508.2 | 1129965  | 4457473  | 2227389  | 176656.8 | 2928075  | 3256608  |
| 1.68E+09 | 2.54E+09 | 33398056 | 16047953 | 12845301 | 1.37E+09 | 7.91E+09 | 6.05E+09 | 9452087  | 390740.3 |
| 489918.3 | 307563.4 | 132653.4 | 139165.2 | 265866.8 | 1100082  | 933969.1 | 493999.2 | 85787.18 | 318063.3 |
| 1109218  | 805895.8 | 13101.21 | 12484.53 | 116018   | 2781510  | 3008452  | 1310962  | 141635.7 | 604502.5 |
| 173715.6 | 217591.7 | 49887.45 | 13498.57 | 116001.5 | 240270.4 | 390937.5 | 540395.6 | 4668.243 | 83965.76 |
| 399191   | 291820.8 | 74584.02 | 30401.59 | 150113.5 | 976990   | 883359.1 | 405610.4 | 34855.04 | 218245.1 |
| 70571571 | 41733903 | 12546856 | 6352620  | 30899597 | 1.48E+08 | 1.38E+08 | 69110187 | 13191347 | 52178892 |
| 306724.5 | 224317.2 | 103772.1 | 117014.6 | 110559.8 | 558925.4 | 570992.2 | 671910.1 | 68836.87 | 259936.8 |
| 2424119  | 1774209  | 253503.1 | 193999.2 | 907971.6 | 5122516  | 6388841  | 1529943  | 483603   | 1655803  |
| 513880.3 | 709031.5 | 348110.5 | 200234   | 912348.5 | 605623.4 | 669612.4 | 1742894  | 63500.72 | 44287.97 |
| 522888.4 | 312421.3 | 80076.99 | 84773.51 | 293157.6 | 958580   | 1074105  | 869678.6 | 61916.77 | 395173.7 |
| 224885.4 | 118161.5 | 0        | 2367.27  | 5358.824 | 212069.5 | 1002993  | 185375   | 97412.1  | 190234.1 |
| 222443.4 | 191065.4 | 52010.57 | 226411.7 | 77661.71 | 590440.5 | 227158.4 | 491629.5 | 110063.8 | 76976.95 |
| 367073.8 | 310482   | 6675.239 | 5717.227 | 55164.93 | 124191   | 1489343  | 842263.3 | 10902.96 | 383116.4 |
| 311082.9 | 177264.1 | 364471.3 | 396120.6 | 377458.5 | 303493.3 | 157158.5 | 456370.7 | 132722.5 | 102769.9 |
| 5028915  | 2685722  | 4930711  | 2514467  | 10821857 | 429794.8 | 7490219  | 8526399  | 4712219  | 6902322  |
| 256268.6 | 443125.3 | 115935.6 | 20747.65 | 122684.4 | 587186.3 | 328438   | 1046930  | 9568.654 | 56938.2  |
| 836514   | 551449.3 | 90962.81 | 31795.34 | 239861.3 | 1834858  | 1757937  | 1081502  | 64296.71 | 473962.7 |
| 17400815 | 11022254 | 1868121  | 1815303  | 4333211  | 20501386 | 64682585 | 27918878 | 2301163  | 9288326  |
| 182170.6 | 122113.5 | 6002.821 | 7535.981 | 13411.93 | 49577.22 | 758903.6 | 211316.7 | 87668.94 | 208247   |
| 853944.4 | 736432.6 | 10616.02 | 6605.392 | 87717.68 | 733890.8 | 3812614  | 1510574  | 203951.6 | 448846.1 |
| 364135.7 | 289163.6 | 124430.2 | 695819.9 | 565589   | 237076.6 | 115365.5 | 231840.1 | 245879.9 | 874496.4 |
| 9452001  | 9429140  | 71589.59 | 78220.71 | 4025528  | 10815470 | 29046679 | 9041864  | 99545.76 | 1556637  |
| 206597.7 | 135280   | 5279.127 | 5463.844 | 3094.703 | 465799.8 | 623357.9 | 269445.4 | 81889.13 | 180003.2 |
| 370004.9 | 279438.9 | 35157.35 | 29321.36 | 188892   | 979345.2 | 514286.8 | 713408.8 | 13460.41 | 163856.6 |
| 2286828  | 1639280  | 57730.18 | 22181.23 | 301693.6 | 4627338  | 5743257  | 3379455  | 531098.7 | 1653260  |
| 483451.3 | 461931.1 | 0        | 2363.961 | 38281.13 | 426257.7 | 1764771  | 719792.7 | 40737.13 | 409366.4 |
| 1063531  | 1402483  | 212671.9 | 124552.9 | 518945.5 | 1493604  | 2604429  | 435055.5 | 394085.6 | 779270.1 |
| 711954.3 | 1031589  | 290546.5 | 59147.07 | 134550.8 | 1690509  | 1125081  | 2532865  | 14626.78 | 437473.1 |
| 289267.3 | 224208.8 | 19566.69 | 0        | 61714.71 | 716523.3 | 564052.4 | 552717.5 | 45100.73 | 68834.6  |
| 15430250 | 9843015  | 2128851  | 2245414  | 7681362  | 37317951 | 23988392 | 25122215 | 1931590  | 8383310  |

|          |          |          |          |          |          |          |          |          |          |
|----------|----------|----------|----------|----------|----------|----------|----------|----------|----------|
| 612965.7 | 552608.2 | 70076.16 | 14155.96 | 160921.1 | 1813489  | 812908.8 | 1340846  | 83329.74 | 152679.3 |
| 384843.7 | 285144.6 | 56829.82 | 43733.43 | 194021.8 | 759467.6 | 774455.7 | 507335.4 | 17900.46 | 152332.7 |
| 20753791 | 12224326 | 5602406  | 2951669  | 10517139 | 44117408 | 35973897 | 20555631 | 4299012  | 13811088 |
| 179962.1 | 158682.4 | 112584.1 | 89942.88 | 85534.2  | 79472.58 | 484010.4 | 277074.7 | 65813.48 | 117670.4 |
| 92479.24 | 82636.61 | 4434.042 | 3359.083 | 21376.78 | 76135.76 | 324389.6 | 155143.2 | 5234.94  | 49426.06 |
| 1051392  | 553351.2 | 430963.9 | 479947.3 | 765090.8 | 1294616  | 2494381  | 1449458  | 343490.1 | 770263.4 |
| 1305904  | 2372478  | 7217.663 | 10336    | 236243.9 | 3839202  | 1845638  | 411227   | 0        | 34594.32 |
| 709857.3 | 502905.8 | 137141.2 | 53631.72 | 387651.7 | 1638965  | 1158345  | 1046818  | 227958.1 | 502235.1 |
| 634811.2 | 578428.6 | 0        | 0        | 48574.1  | 1443562  | 1483438  | 847236.7 | 4860.014 | 107407.4 |
| 788134.8 | 722236.2 | 6396.349 | 0        | 271321.8 | 771839.5 | 2624804  | 1368945  | 53755.88 | 762625.2 |
| 542830.1 | 470778.7 | 4921.721 | 0        | 4089.332 | 754808.8 | 2164125  | 864090.6 | 51741.24 | 417379.2 |
| 122911.6 | 64904.13 | 82962.97 | 79298.82 | 82211.79 | 131637.7 | 220599.5 | 138276.7 | 30434.24 | 131517.6 |
| 953874.1 | 637758.2 | 5231.975 | 2960.798 | 77361.47 | 2240892  | 2748856  | 1197084  | 117806.6 | 597630.7 |
| 305893   | 420723.1 | 239025   | 47867.18 | 210258.6 | 22723.39 | 898984.9 | 1051643  | 188994.5 | 137854.9 |
| 1925592  | 991112.7 | 385820.8 | 235622.2 | 1108317  | 4480659  | 3871416  | 2432594  | 477163.7 | 1346202  |
| 252905.1 | 138614   | 233548.2 | 266134.3 | 284078.9 | 283011.6 | 226764.1 | 320087.6 | 216347.2 | 75978.55 |
| 510215.5 | 472205.2 | 31618.05 | 6424.458 | 86782.3  | 212475.1 | 2014546  | 1129580  | 36336.02 | 366222.9 |
| 786360   | 651012.3 | 127885.5 | 132130.5 | 237504.5 | 2364890  | 837379.7 | 893065.9 | 141437.5 | 86983.37 |
| 1501665  | 252810.7 | 1264327  | 1612932  | 1928089  | 1044091  | 1574052  | 1939548  | 1286938  | 1402803  |
| 359944.2 | 363794.2 | 18037.89 | 16035.94 | 83054.99 | 729464.9 | 1074975  | 481064.6 | 16212.09 | 97346.11 |
| 3942465  | 3249812  | 725858.2 | 941316.1 | 2244444  | 11065024 | 5823390  | 3291886  | 498180.6 | 1500458  |
| 85165.02 | 56283.22 | 12832.62 | 35941.17 | 133594   | 102444.7 | 125403.8 | 109827.5 | 15584.76 | 88650.79 |
| 3427819  | 2985326  | 59290.15 | 12946.49 | 223579.2 | 2834116  | 15482880 | 3614593  | 247391.3 | 3622436  |
| 509266.7 | 294231.8 | 178602.2 | 124105.1 | 286595   | 1223662  | 845841.4 | 903602.4 | 143431.2 | 315174   |
| 1218040  | 1233816  | 538780.3 | 601402   | 612227.7 | 2387503  | 1654994  | 648964.2 | 154774.5 | 626429.2 |
| 3530750  | 6468597  | 31444.52 | 25466.39 | 662971.2 | 10261610 | 5112615  | 1005336  | 0        | 96628.79 |
| 136101.6 | 134443.5 | 122213.4 | 89631.3  | 282734.8 | 98090.08 | 118686.7 | 369560.1 | 53543.76 | 53467.63 |
| 1260613  | 1045245  | 333443.9 | 196068.9 | 677453   | 3073311  | 1710266  | 1458240  | 224987.6 | 431546.1 |
| 170573.3 | 131664   | 13899.01 | 3430.829 | 64167.8  | 497006.5 | 324835.1 | 292458.1 | 10618.63 | 51845.63 |
| 14068104 | 14420519 | 16477132 | 7655128  | 19767125 | 8262551  | 21298097 | 35286035 | 273407.9 | 3013692  |
| 228152   | 235000.8 | 0        | 0        | 0        | 45509.23 | 997132.3 | 523320.3 | 0        | 9415.84  |
| 166150.1 | 151007.3 | 13592.44 | 0        | 46574.69 | 147811.6 | 686796.8 | 197632.1 | 0        | 17588.12 |
| 1228862  | 754297.8 | 178149.8 | 117382.3 | 482526.4 | 2482928  | 2597404  | 1223441  | 220304.1 | 851503.6 |
| 137738.2 | 107465.5 | 17536.99 | 12113.84 | 50093.28 | 428874.8 | 220181.5 | 307428.1 | 9210.686 | 110106.6 |
| 215261.5 | 230607.1 | 108536   | 115495.4 | 143834.1 | 128584.7 | 524224.2 | 56437.04 | 86585.49 | 217128.7 |
| 14612923 | 16811124 | 1122522  | 1004481  | 1885128  | 14332700 | 49637989 | 8130199  | 1073529  | 5136633  |
| 807393.2 | 664135.8 | 87025.35 | 64879.84 | 128900.1 | 1689259  | 1852270  | 1660685  | 55595.1  | 324554.4 |
| 163675.4 | 136251.3 | 0        | 2910.248 | 10118.74 | 71819.17 | 672253.3 | 255707.7 | 34890.21 | 72469.18 |
| 260459.2 | 261903.9 | 3551.408 | 0        | 8005.489 | 444519.5 | 764489.9 | 516094.2 | 60327.28 | 87326.34 |
| 66690.4  | 65689.28 | 8465.853 | 4206.837 | 34100.62 | 126761.1 | 179064.2 | 44112.94 | 0        | 46795.27 |
| 434086.6 | 335883.1 | 112818.6 | 134811.4 | 148092.1 | 644394.9 | 1031098  | 667565.8 | 117589.2 | 57727.25 |
| 12698982 | 8126334  | 2713708  | 1957370  | 8400517  | 29546087 | 23696324 | 10793343 | 2763973  | 8394830  |
| 282242.4 | 97850.06 | 185021.4 | 246758.8 | 161569.3 | 445405.6 | 343824.8 | 285194.4 | 200687.1 | 169694.9 |
| 412760.5 | 297557.5 | 38877.31 | 23627.93 | 139960.1 | 961326.4 | 799056.3 | 441259.7 | 36311.8  | 241264.4 |
| 6.02E+08 | 5.77E+08 | 14438745 | 11024684 | 2.06E+08 | 4.48E+08 | 2.13E+09 | 9.52E+08 | 2552359  | 1.33E+08 |
| 1334113  | 849370.6 | 358960.9 | 484169.9 | 702938.3 | 3403817  | 2010000  | 1369650  | 276929   | 748467.3 |
| 436928.2 | 615200.6 | 61866.99 | 80929.27 | 444187.3 | 1313544  | 431569.3 | 177838.8 | 40097.33 | 147909.2 |

|          |          |          |          |          |          |          |          |          |          |
|----------|----------|----------|----------|----------|----------|----------|----------|----------|----------|
| 703220.6 | 322550.6 | 292745   | 141396.1 | 393555.1 | 1486155  | 1079187  | 892797.6 | 201005.3 | 608605.8 |
| 207638.2 | 56731.42 | 129111   | 300657.8 | 71598.38 | 226387.3 | 333697.3 | 298560.4 | 189614.2 | 205707.7 |
| 1116082  | 809568.9 | 13570.89 | 0        | 83502.59 | 2450015  | 2732099  | 1247554  | 189417.3 | 647448.8 |
| 748640.7 | 445349.3 | 113321.5 | 81351.26 | 291259.1 | 1622114  | 1470974  | 801446.1 | 112277.5 | 526104.5 |
| 2154311  | 1336290  | 459425.6 | 303799.2 | 1192316  | 4906881  | 4386714  | 3510897  | 506907.3 | 1166360  |
| 897906.7 | 617834   | 184567.6 | 460967   | 392307.7 | 2113287  | 1529283  | 1722143  | 116247.8 | 501836.4 |
| 27262713 | 37999816 | 7955161  | 746102.9 | 266755.4 | 22214348 | 95079639 | 79606480 | 121440.4 | 71661.35 |
| 354675.8 | 234329.9 | 40929.58 | 45985.2  | 190511.3 | 869256.3 | 548255.3 | 362998.5 | 67376.95 | 181987.8 |
| 20946906 | 16877743 | 479584.5 | 206251.3 | 2074100  | 16867964 | 78262721 | 34700837 | 5501998  | 12267767 |
| 2909256  | 1990964  | 128833.8 | 96412.35 | 520354.6 | 6006435  | 7068296  | 4515063  | 687489.2 | 1899961  |
| 1800546  | 931020.6 | 318330.2 | 187468.8 | 924163.5 | 4689840  | 3286136  | 2859566  | 409818.2 | 1416908  |
| 527569.4 | 361718.9 | 38049.7  | 16621.94 | 172132   | 1485766  | 793251.3 | 728472.9 | 58426.06 | 253545.6 |
| 567016.4 | 445333.8 | 77230.12 | 137178.9 | 205166.5 | 839874.8 | 1725360  | 391982.5 | 79797.77 | 462424.7 |
| 26531906 | 21201215 | 16812.79 | 5541.364 | 456971.7 | 33278157 | 90812220 | 43353549 | 2423549  | 22145098 |
| 8943061  | 6008857  | 316719.7 | 244708.1 | 870565   | 20502925 | 25265917 | 16158726 | 2658887  | 6995121  |
| 268596.9 | 140677.6 | 47196.36 | 47279.5  | 229262.5 | 597296.3 | 473359.8 | 381122.5 | 134178.7 | 105753.3 |
| 77201.49 | 61754.72 | 20135.09 | 27538.59 | 51515.62 | 166495.6 | 104853.9 | 48829.9  | 4984.019 | 59888.13 |
| 180727.9 | 137039.1 | 27341.15 | 29083.21 | 107929.4 | 387516.4 | 392271.3 | 183698.3 | 20784.08 | 74751.9  |
| 76366.3  | 68971.66 | 0        | 5079.174 | 3445.588 | 134703.8 | 217501   | 109232.9 | 35482.94 | 180941.5 |
| 307424.6 | 157645.4 | 70944.63 | 65664.45 | 130401.7 | 1062877  | 286999.9 | 298330.1 | 428843.7 | 102710.3 |
| 593913.3 | 629894.3 | 151207.6 | 8593.337 | 447351.8 | 441920.2 | 2102571  | 887865   | 49109.87 | 183035.1 |
| 234958.3 | 302737   | 37015.32 | 92714.45 | 35285.16 | 412485.1 | 668596.5 | 770950   | 67824.99 | 61819.9  |
| 1377202  | 528875.4 | 645418.2 | 960481.5 | 1088883  | 2414871  | 1932435  | 1891286  | 661030.6 | 980792.4 |
| 3418732  | 1840793  | 361243.4 | 291544   | 1011813  | 8691328  | 6001782  | 4099200  | 777251.5 | 2777421  |
| 235522.1 | 82338.76 | 192510.3 | 240028   | 59672.72 | 478074.9 | 177337.5 | 167747.7 | 323633.4 | 153678.1 |
| 282154.1 | 180331.7 | 426068.2 | 488988.1 | 113657.5 | 145304.4 | 278427   | 577594.3 | 306643.3 | 135922.9 |
| 1028082  | 904478.6 | 28643.73 | 5765.063 | 75775.67 | 2392920  | 2929239  | 2286577  | 225686.1 | 475542.4 |
| 226008.1 | 320396.4 | 217569   | 302319.1 | 226025.7 | 267024.8 | 59463.95 | 45469.8  | 81180.39 | 130098.1 |
| 660265.6 | 707110.4 | 163419.6 | 133738.9 | 341278.2 | 1993338  | 491922.5 | 986461.3 | 6443.481 | 5573.797 |
| 178459.1 | 164177.6 | 32172.14 | 57690.62 | 100210.2 | 570886.8 | 177888.4 | 106761.7 | 29226.98 | 61286.17 |
| 1517480  | 1117618  | 105446.3 | 72927.98 | 386717.9 | 3207681  | 3465760  | 2913462  | 109503.9 | 709775.9 |
| 464333.4 | 345804   | 7931.845 | 3803.984 | 64154.8  | 1427590  | 697351.3 | 622994.3 | 102991.7 | 283827.2 |
| 287659.1 | 205411.1 | 5567.099 | 2741.044 | 25634.54 | 664545.9 | 816544.1 | 404908.8 | 30764.4  | 187520.2 |
| 521511.4 | 368857.3 | 148931.7 | 147893   | 226745.8 | 1248963  | 940960.4 | 370569.4 | 81420.37 | 364689.6 |
| 5054156  | 3898265  | 225073.6 | 80831.79 | 893770.2 | 9773163  | 13078989 | 7740789  | 1118864  | 2729243  |
| 1226908  | 1165277  | 40904.97 | 9611.39  | 41908.26 | 1167316  | 5301698  | 3191580  | 114948.4 | 694319   |
| 405877.6 | 273078   | 70890.97 | 45957.23 | 189479.1 | 1208021  | 608544.1 | 407568.3 | 84173.09 | 205306.1 |
| 151309.2 | 105684.5 | 28327.32 | 9451.943 | 25246.04 | 249598.6 | 409571.8 | 211285.6 | 62164.3  | 69785.79 |
| 110130.1 | 43603.29 | 35964.27 | 40581.98 | 60212.19 | 243872.9 | 187523   | 120874.7 | 171220.5 | 76724.46 |
| 7528884  | 6758909  | 7036491  | 4479808  | 15395276 | 4265334  | 7800080  | 8945290  | 293447   | 1979909  |
| 1874685  | 1287336  | 210821.5 | 102927.3 | 685021   | 3465213  | 4513359  | 2763276  | 217987.8 | 788337.7 |
| 4288150  | 2532006  | 791580.1 | 381633   | 1941253  | 10702365 | 8514307  | 5035057  | 660823.5 | 2780618  |
| 1462215  | 1850860  | 74362.22 | 80977.83 | 410609.9 | 590977.8 | 5659730  | 608874.9 | 9158.635 | 329201.7 |
| 318589.2 | 88438.95 | 59366.68 | 69199.63 | 85047.93 | 330413   | 981857.7 | 409824.7 | 336170.5 | 253597.4 |
| 4248192  | 7091871  | 6289.825 | 11532.05 | 0        | 860024.2 | 18621134 | 16766054 | 0        | 0        |
| 425295.5 | 180836.6 | 417804.9 | 509450   | 507589.4 | 283717.6 | 440671.2 | 728866.4 | 360876   | 401787.4 |
| 16407960 | 27475557 | 30921.23 | 4843.263 | 0        | 6581292  | 68927406 | 64893675 | 28161.84 | 0        |

|          |          |          |          |          |          |          |          |          |          |
|----------|----------|----------|----------|----------|----------|----------|----------|----------|----------|
| 462861   | 377274.3 | 28269.6  | 4856.601 | 222930.1 | 884960.3 | 1282534  | 358064   | 14748.97 | 272985.6 |
| 1356861  | 649626.3 | 470508.4 | 481505.7 | 759030.4 | 2614693  | 2264915  | 1242460  | 552466.4 | 1004938  |
| 583503.4 | 411679.4 | 144505   | 217980.5 | 125212.9 | 1059777  | 1261841  | 527822.1 | 533207.2 | 1249992  |
| 836215.7 | 566029.5 | 6413.724 | 4758.032 | 17764.39 | 1803189  | 2562304  | 764114.9 | 222769.4 | 1123241  |
| 1069097  | 1024758  | 112203.9 | 154153.9 | 481964.4 | 2186498  | 2658575  | 1333920  | 77195.43 | 152221.9 |
| 249032   | 193132.9 | 200438.1 | 198489.5 | 98257.58 | 480956.7 | 229579.8 | 501115.6 | 100239.4 | 124867.2 |
| 139049.7 | 92827.22 | 10051.57 | 11307.99 | 61808    | 346966.7 | 294412.1 | 260398.2 | 32686.91 | 63858.45 |
| 2.87E+08 | 6.32E+08 | 17268500 | 15298734 | 10685725 | 4.57E+08 | 8.22E+08 | 1.42E+09 | 5244094  | 9117229  |
| 8197439  | 9586470  | 198630.2 | 167734.6 | 3722296  | 6956452  | 27639383 | 4789520  | 10265.63 | 746548.5 |
| 2156118  | 2035795  | 175385.3 | 165016   | 590776.6 | 2076800  | 8398652  | 2345521  | 98382.04 | 473151.6 |
| 13238002 | 8152909  | 3232278  | 2772495  | 9398519  | 28086605 | 24934403 | 16333961 | 1968995  | 7516966  |
| 920115.6 | 177517.1 | 194326.1 | 181123.2 | 509905.8 | 2164733  | 1411718  | 862308.9 | 1207147  | 909145.2 |
| 17574499 | 15713220 | 2829478  | 2967187  | 46446132 | 4449674  | 35153493 | 43100663 | 112915.5 | 16739695 |
| 34577203 | 26181348 | 3705799  | 2001722  | 23319810 | 6481720  | 1.28E+08 | 38875827 | 9686462  | 25917540 |
| 837382   | 1229539  | 35630.37 | 4663.214 | 41540.17 | 291308.1 | 3516981  | 2960242  | 0        | 1853.701 |
| 135792.6 | 166926.1 | 0        | 2489.606 | 0        | 314754.4 | 325319.1 | 424873.5 | 5290.217 | 87709.81 |
| 120746.4 | 65350.57 | 34266.74 | 6399.651 | 99673.7  | 186473.5 | 258443.4 | 93765.69 | 30629.16 | 116639   |
| 535608.7 | 403869.5 | 89091.28 | 71421.58 | 342240.5 | 1301801  | 775278.6 | 345342.8 | 164768.2 | 284532.6 |
| 628979.5 | 437896.6 | 117456.5 | 156678.2 | 295016.5 | 1093941  | 1373303  | 713066.8 | 60380.15 | 306329   |
| 16897365 | 16697379 | 13417332 | 8966107  | 33737741 | 5008122  | 26400370 | 41559968 | 61324.55 | 25923421 |
| 274546   | 232307.1 | 129839.4 | 75925.61 | 598707.9 | 387295.9 | 227185.6 | 464383   | 161872.1 | 109354.9 |
| 68758.08 | 63684.45 | 2464.132 | 0        | 4237.884 | 6562.753 | 355895.5 | 130491.7 | 0        | 0        |
| 253471.8 | 198545.5 | 44849.26 | 56313.91 | 88573.65 | 459066.1 | 669668.4 | 447318.9 | 15693.44 | 87741.95 |
| 6350567  | 4106805  | 1115340  | 536227.2 | 3158035  | 13869698 | 14252227 | 5350591  | 1272571  | 4108462  |
| 1360347  | 971430.5 | 113909.7 | 3809706  | 2464173  | 363368.1 | 330844.8 | 2435945  | 716883   | 241665.5 |
| 151937.3 | 33245.26 | 190963.5 | 125128   | 34986.7  | 314893.7 | 76663.67 | 196266.6 | 145247.9 | 106760.5 |
| 760711.3 | 542375.6 | 122121.3 | 125012.3 | 534377.1 | 1625808  | 1268994  | 913348.5 | 131638.1 | 333266.8 |
| 999916   | 594547.4 | 176330.3 | 69872.53 | 414143.3 | 2120145  | 2045764  | 1041975  | 182813.5 | 666117   |
| 682103.8 | 436255.3 | 1126681  | 142917   | 1541866  | 260706.8 | 446190.3 | 431860.3 | 1145423  | 1159158  |
| 699751   | 426215   | 112624.5 | 245766.4 | 474704.6 | 1259285  | 1304493  | 1063172  | 129679.9 | 358581.6 |
| 247276.7 | 195777.1 | 24069.75 | 7033.176 | 48740.9  | 587812.5 | 518325.7 | 233212.2 | 6565.108 | 111728.5 |
| 266684.2 | 178848.4 | 21613.17 | 6483.937 | 45421.27 | 635761   | 680759.1 | 360994.4 | 14735.13 | 156617   |
| 782798.6 | 519095   | 68546.21 | 128052.1 | 204921.7 | 2132107  | 1229638  | 982273   | 133496.4 | 360074.6 |
| 3682005  | 2533046  | 78398.11 | 55353.51 | 271080.6 | 6269644  | 10934925 | 6305982  | 903427   | 2911728  |
| 292665.7 | 204616.5 | 189336.4 | 235891.4 | 48929.22 | 498099.3 | 451484.7 | 384537.8 | 145858.4 | 115118.1 |
| 941945.2 | 582758.2 | 176493   | 40225.4  | 379229.2 | 2394102  | 1897298  | 1071736  | 111776.7 | 610050.2 |
| 186337.6 | 120656.4 | 38476.77 | 2515.73  | 29622.64 | 94017.58 | 720027.5 | 163429   | 40947.97 | 149376.9 |
| 470539.3 | 478119.1 | 3144.479 | 0        | 9856.333 | 962153.6 | 1497066  | 257510.5 | 6201.734 | 159660.4 |
| 1474591  | 779702.3 | 1972717  | 2484680  | 834807.2 | 1185832  | 1041949  | 2624445  | 1758745  | 1347153  |
| 280388.7 | 132437.6 | 48720.95 | 19419.36 | 199100.7 | 170237.3 | 908896.9 | 352184.1 | 85503.43 | 221541.1 |
| 8770354  | 5264994  | 966206.4 | 548273   | 4287749  | 25071847 | 11350147 | 14492055 | 1193269  | 6023268  |
| 281917.6 | 234485   | 242813.6 | 255916.6 | 122273.8 | 616818.2 | 213780   | 450437   | 39805.79 | 112779.2 |
| 115135.8 | 101826.4 | 3390.952 | 4978.521 | 13569.43 | 362831.6 | 164811.1 | 167321.5 | 10213.72 | 27915.21 |
| 2861961  | 2493297  | 298070.3 | 700744.3 | 2726699  | 2385147  | 7664552  | 6650753  | 35019.08 | 2356809  |
| 467108.6 | 294120.2 | 77145.98 | 22819.52 | 250518.5 | 991703.1 | 1075584  | 833628.6 | 95817.69 | 285830.7 |
| 237945.8 | 177649.2 | 75760.45 | 94864.81 | 111773   | 477298.3 | 394025.2 | 484071.5 | 52191.28 | 112113.6 |
| 21319169 | 46695551 | 19245735 | 2848124  | 792550.1 | 91945861 | 218244   | 390129.4 | 410189.9 | 257060.9 |

|          |          |          |          |          |          |          |          |          |          |
|----------|----------|----------|----------|----------|----------|----------|----------|----------|----------|
| 127381.6 | 132406.3 | 8441.735 | 0        | 52971.27 | 282012.8 | 321224.4 | 134106.3 | 14719    | 101073.5 |
| 153323.3 | 116026.5 | 153118.3 | 153320   | 185103   | 197852.8 | 94147.56 | 54848.9  | 108787.7 | 143154.8 |
| 124660.4 | 89356.66 | 4892.829 | 0        | 22469.4  | 337089.6 | 234730.2 | 107737.2 | 11354.54 | 74501.97 |
| 7453793  | 4985972  | 1542097  | 902477.6 | 3860651  | 17009556 | 12783083 | 10708449 | 2565440  | 5410868  |
| 170663.4 | 42916.26 | 141614.6 | 179706.5 | 202345.2 | 150736.4 | 185554.3 | 200225.5 | 103536.7 | 155770.5 |
| 298185.7 | 371011.5 | 2096.294 | 0        | 65376.57 | 254850.1 | 1090204  | 85904.9  | 0        | 0        |
| 354312.9 | 221121.8 | 78572.75 | 52992.64 | 124483.1 | 896565   | 561507.4 | 338068.6 | 85506.85 | 197216.9 |
| 1844305  | 877621   | 535191.4 | 929550.4 | 1837074  | 2534524  | 3200069  | 2791956  | 586465.7 | 1640222  |
| 170966   | 103673.4 | 37299.21 | 31404.37 | 34859.84 | 430430.5 | 292738.3 | 312700.7 | 30132.21 | 125828.2 |
| 509490.3 | 322314.9 | 61936.63 | 36653.42 | 158461.7 | 1225616  | 1155482  | 555423   | 92088.35 | 302922.9 |
| 1036036  | 738785.2 | 155678.1 | 82733.91 | 326319.3 | 2396412  | 2042677  | 1075902  | 81454.08 | 611405.7 |
| 422692.2 | 152876.4 | 163830.9 | 81676.85 | 133958.7 | 924419   | 753290.6 | 555874.7 | 170696.2 | 407703   |
| 1350184  | 903581   | 417765.5 | 193640.4 | 686330.4 | 2989495  | 2263190  | 1208254  | 213836.3 | 823222.8 |
| 1.21E+08 | 1.95E+08 | 12577256 | 11529966 | 2.85E+08 | 15289596 | 2.5E+08  | 4.66E+08 | 38668218 | 7301951  |
| 629807.3 | 567050.5 | 364875.3 | 223509.2 | 421305.9 | 1653593  | 382303.1 | 472080.4 | 219896.6 | 452308.2 |
| 11196442 | 7949373  | 1076033  | 643220.1 | 3606976  | 24810601 | 23974986 | 15453385 | 1138534  | 6958915  |
| 369028.5 | 289323.9 | 10454.78 | 2742.669 | 82039.88 | 1112223  | 566236.5 | 443657.4 | 34891.82 | 150523   |
| 104160.7 | 48453.13 | 3546.794 | 8886.555 | 62089.78 | 74951.67 | 393074.5 | 130826.8 | 31319.07 | 77869.45 |
| 406685.1 | 591343.5 | 58149.99 | 37631.71 | 436936.9 | 849190   | 564877.2 | 325926.8 | 25664.32 | 97032.67 |
| 234050.1 | 163630.1 | 94254.7  | 106675.7 | 91950.39 | 548721.6 | 361774.9 | 123388.7 | 60282.6  | 174159.8 |
| 1237847  | 884077.2 | 305275.9 | 145600.7 | 711327.7 | 2956589  | 2263649  | 991692.3 | 214674.4 | 708239   |
| 709429.4 | 702310.7 | 5308.7   | 5076.068 | 7183.256 | 1160977  | 2217367  | 1238010  | 49518.21 | 466707   |
| 1940025  | 1137698  | 353155.9 | 159296.1 | 768209.8 | 4060916  | 4072378  | 2042092  | 317790.9 | 1383660  |
| 179909.9 | 61690.13 | 36227    | 17927.21 | 91304.6  | 403270.3 | 327363.2 | 222621.6 | 156092.8 | 83957.6  |
| 370456.1 | 329791.5 | 0        | 0        | 26816.2  | 750170.1 | 1003550  | 465203.4 | 4576.304 | 78775.06 |
| 301235.2 | 268326.5 | 33660.98 | 9868.594 | 156755.9 | 208248   | 1165206  | 292710.6 | 0        | 72765.73 |
| 286758.9 | 373316.9 | 82104.98 | 93056.41 | 679274.9 | 309539.9 | 323561   | 928957.2 | 0        | 57645.84 |
| 474085.6 | 350767.4 | 65793.56 | 70030.91 | 152262.4 | 1102556  | 1057339  | 588131   | 40848.17 | 292422.5 |
| 545725.2 | 353946.3 | 23028.51 | 19702.03 | 169069.3 | 1094324  | 1334794  | 566524.4 | 27788.52 | 406622.9 |
| 176173.3 | 174604.3 | 6195.244 | 3705.678 | 83785.9  | 268252.6 | 553648.9 | 201294   | 13440.79 | 103116.8 |
| 1530231  | 1672334  | 3565509  | 1133576  | 2222186  | 0        | 469132.9 | 3800009  | 0        | 2721120  |
| 318852.1 | 305679.2 | 12934.25 | 148575.4 | 167286.7 | 548596   | 768779.5 | 172057.2 | 11223.26 | 147304.3 |
| 690473.7 | 409059.5 | 177520.2 | 200612.5 | 425397.2 | 1624721  | 1113399  | 1014824  | 123052.2 | 399265.3 |
| 242838.8 | 169996.6 | 68696.32 | 61459.32 | 169178.8 | 418112.1 | 466568.1 | 130621   | 29138.21 | 231942.9 |
| 176131.3 | 261603.3 | 123474   | 103014.3 | 416007   | 59337.96 | 143702.2 | 638794.3 | 0        | 52737.13 |
| 407891.3 | 293020.8 | 6243.14  | 0        | 61717.98 | 812601.7 | 1088807  | 674958.8 | 147202.8 | 211666   |
| 211569.5 | 232175.8 | 0        | 0        | 3216.661 | 427700.2 | 584335.2 | 309044.5 | 40218.92 | 89552.13 |
| 786073   | 636480.7 | 3565.061 | 17021.53 | 11156.08 | 1141183  | 2924883  | 1367915  | 57499.2  | 697344.8 |
| 124101.9 | 58951.96 | 70509.6  | 149692.2 | 169760.4 | 149837.1 | 71943.88 | 169124   | 78656.44 | 85227.79 |
| 554901.4 | 386871.3 | 159272   | 145136.2 | 235453.3 | 1412081  | 901764   | 587400.5 | 102975.3 | 362019   |
| 1544801  | 2014478  | 0        | 0        | 4044.822 | 3121851  | 4268079  | 1888769  | 17569.69 | 599295.1 |
| 196716.5 | 138070.2 | 40263.52 | 3659.948 | 67821.12 | 438462.9 | 463900.2 | 210205.9 | 18638.26 | 131768.6 |
| 350667.7 | 374119.5 | 87127.51 | 73570.01 | 191183.4 | 824299.5 | 634554.2 | 986471   | 13734.17 | 160668.6 |
| 114399.5 | 101698.9 | 0        | 0        | 5032.342 | 0        | 537399   | 162936.6 | 4959.594 | 50725.38 |
| 508765.5 | 682244.8 | 155537.9 | 4110.201 | 0        | 212757.3 | 2046799  | 1490980  | 10866.81 | 0        |
| 12819331 | 8995670  | 1515247  | 2786313  | 8301236  | 54251474 | 46705.33 | 27417579 | 3339821  | 8327148  |
| 175818.9 | 133699.6 | 64823.64 | 71517.18 | 64302.18 | 311236.9 | 390019.5 | 131887.4 | 23823.36 | 145268.7 |

|          |          |          |          |          |          |          |          |          |          |
|----------|----------|----------|----------|----------|----------|----------|----------|----------|----------|
| 3822357  | 2562363  | 607762.3 | 272517.4 | 1207800  | 9025978  | 7456865  | 4186917  | 495990.7 | 2227001  |
| 316961.6 | 281005.1 | 89082.62 | 127136.7 | 186372.5 | 867469.6 | 361267.6 | 498463.7 | 50877.53 | 61653.21 |
| 1895436  | 2047379  | 159872.6 | 292288.7 | 976686.7 | 4424894  | 3939131  | 3144196  | 104917.8 | 1368886  |
| 171576.5 | 110555.9 | 20544.72 | 26640.2  | 8534.366 | 28385.18 | 736496.7 | 185079.5 | 0        | 142756.2 |
| 135452.6 | 110448.4 | 21496.83 | 38359.66 | 64655.63 | 316974.1 | 254701   | 286468   | 8678.771 | 69236.94 |
| 260312.4 | 216647.9 | 144868.6 | 141596   | 63584.9  | 414206.7 | 506083.8 | 132359.7 | 117953.2 | 132074.1 |
| 454051.6 | 321290.6 | 45488.94 | 21363.26 | 185256.2 | 921494.1 | 1033168  | 497767.4 | 37964.5  | 233415.6 |
| 5755331  | 6983072  | 4180284  | 6230068  | 1701932  | 9087851  | 8400132  | 18089866 | 2958427  | 1639584  |
| 236266.3 | 174843.5 | 14886.67 | 15949.02 | 34377.42 | 639536.2 | 440671.5 | 412655.2 | 17319.57 | 82560.44 |
| 175466.7 | 108351.9 | 141008.8 | 143025.6 | 146092.8 | 113423.6 | 319485.8 | 265806.2 | 91531.18 | 102804.6 |
| 180691   | 161836.7 | 12197.45 | 4431.521 | 52313.82 | 602513.7 | 263640.8 | 219041.6 | 5934.8   | 49282.93 |
| 7544572  | 5214222  | 1754722  | 1449893  | 4669768  | 16462930 | 12495500 | 8391114  | 1090300  | 3678720  |
| 280899.9 | 133577.2 | 117870.2 | 140694.9 | 182932.6 | 455850   | 483918   | 269363.1 | 110807.6 | 257559.3 |
| 20661986 | 14430330 | 3575019  | 1777490  | 10130524 | 45160937 | 40032199 | 15261669 | 4295503  | 13105874 |
| 2630029  | 3119244  | 326763.9 | 412924.4 | 1801201  | 531081.2 | 10643289 | 7935116  | 18341.66 | 1749423  |
| 545089.7 | 380730.2 | 67491.44 | 57407.38 | 251698.2 | 1376202  | 1047583  | 540486.2 | 85945.88 | 279486.5 |
| 2240555  | 1457246  | 392996.8 | 181698.6 | 1069205  | 5120825  | 4156247  | 4135333  | 413765.2 | 1201873  |
| 1842113  | 1136343  | 104537   | 118293.3 | 81569.71 | 3385659  | 5818744  | 2743636  | 390277.2 | 1541216  |
| 1303991  | 1263841  | 38180.93 | 14582.16 | 424848.7 | 3463973  | 2792728  | 771628.2 | 22660.24 | 442178   |
| 957196.3 | 1355448  | 5708.68  | 0        | 8617.041 | 202571.9 | 4327958  | 3190129  | 24402.31 | 203517.4 |
| 183651.9 | 107935.6 | 54126.28 | 53935.55 | 88280.39 | 516259.6 | 182750.1 | 123257.7 | 60691.92 | 141982.6 |
| 2607555  | 2624197  | 0        | 0        | 142131.3 | 2248389  | 10127408 | 4816800  | 66345.23 | 1914789  |
| 4002164  | 4155257  | 3735485  | 2366599  | 7234026  | 1263228  | 5903014  | 9922822  | 6643.504 | 6707354  |
| 423589.4 | 456166.1 | 0        | 76545.73 | 348979   | 358016.1 | 1265806  | 518329.5 | 0        | 0        |
| 821777.4 | 527561.8 | 854404.8 | 852748.5 | 812480.8 | 1056186  | 474867.4 | 1278111  | 73063.09 | 499845.1 |
| 92678.64 | 64405.51 | 0        | 4086.516 | 9868.348 | 199857   | 236002.2 | 105233.4 | 18014.5  | 115413.1 |
| 753657.1 | 722070.8 | 248009   | 155604.9 | 359488.4 | 2617695  | 513643.9 | 514302   | 103629.2 | 529025.1 |
| 119936.5 | 94398.12 | 45043.14 | 0        | 36346.54 | 274653.2 | 228084   | 116855.8 | 8583.479 | 50095.99 |
| 989544.2 | 798255.1 | 206755.1 | 235780.8 | 1040461  | 2104975  | 1470867  | 727852.6 | 1047769  | 167526.1 |
| 6091889  | 8720856  | 2392267  | 620095.7 | 507338   | 1982651  | 23667273 | 20793758 | 185242.5 | 7409433  |
| 4611105  | 5141473  | 779069.4 | 408964.6 | 4656278  | 138167.2 | 16243434 | 8610727  | 62553.18 | 1473008  |
| 112960.6 | 120297.8 | 0        | 0        | 33807.64 | 405914.6 | 145358.6 | 78429.28 | 10499.11 | 32652.15 |
| 232486.4 | 231388.9 | 158231   | 151457.2 | 105419   | 494216   | 280110.3 | 66146.56 | 37494.07 | 143263   |
| 91323.83 | 59001.46 | 28676.84 | 43243.51 | 44011.09 | 206481.2 | 124992.6 | 114200.6 | 26681.44 | 31843.06 |
| 493067.2 | 200987.3 | 376857.4 | 350867   | 27621.84 | 562446.3 | 1104584  | 547952.2 | 307083.4 | 424184.6 |
| 311348   | 349875.8 | 25780.61 | 2889.643 | 46836.85 | 1214540  | 325856.4 | 627670.9 | 0        | 44725.03 |
| 588840   | 469433.7 | 6647.543 | 7558.451 | 69176.17 | 1474537  | 1473510  | 701900.4 | 112783.5 | 290640   |
| 2104352  | 2298087  | 131992.9 | 142551   | 151578.6 | 1103963  | 8584770  | 5775976  | 151801   | 785109.1 |
| 67429.42 | 54297.66 | 0        | 2737.368 | 0        | 131443.5 | 193054.5 | 143852.4 | 9970.304 | 30644.14 |
| 1786038  | 886395.5 | 427797.9 | 497343.7 | 1006129  | 3250599  | 3921932  | 2670325  | 548258.2 | 1401718  |
| 629813   | 615589.6 | 126607.9 | 465389.1 | 310109.1 | 175625.2 | 2168938  | 803378.1 | 24471.63 | 138037.8 |
| 1568458  | 726449   | 619295.4 | 314887.2 | 1046868  | 3551300  | 2171624  | 1805353  | 471531.4 | 1237140  |
| 737879.7 | 375316.5 | 142335.8 | 47730.53 | 433787.2 | 545993.7 | 2424206  | 864392.3 | 261115.1 | 757387.2 |
| 473448.4 | 233006.2 | 176537   | 140429   | 257281.8 | 1243396  | 596451.7 | 423364.8 | 194296.2 | 456331.7 |
| 4080531  | 3224959  | 375293.8 | 780967.5 | 1313569  | 5702117  | 11708977 | 2828964  | 307264.5 | 3784842  |
| 10644095 | 10488499 | 3331.795 | 0        | 674837   | 9965302  | 40738109 | 19829467 | 267632.4 | 7488374  |
| 74191.81 | 47404.71 | 37999.26 | 37249.79 | 49665.04 | 83612.38 | 156268.7 | 93417.24 | 26182.85 | 20584.42 |



|          |          |          |          |          |          |          |          |          |          |
|----------|----------|----------|----------|----------|----------|----------|----------|----------|----------|
| 5935915  | 3608507  | 1396333  | 696579.7 | 2048642  | 10778447 | 15436201 | 8711564  | 1842381  | 2700842  |
| 1654706  | 461468.6 | 1040121  | 903817.1 | 1406813  | 2721251  | 2121922  | 1697052  | 1149605  | 1644671  |
| 2504641  | 2001153  | 0        | 3183.256 | 18191.25 | 3240502  | 9676846  | 4223103  | 177591.9 | 2003115  |
| 940385.5 | 967014.1 | 762361.1 | 0        | 2047085  | 697852.5 | 1303388  | 2293058  | 0        | 1168043  |
| 10481511 | 10225541 | 5912965  | 3881334  | 3797535  | 3635363  | 36737934 | 25723831 | 232934.5 | 5061245  |
| 3502749  | 3053834  | 71550.68 | 26538.68 | 284933   | 2446844  | 15318969 | 6035429  | 807095.7 | 1863313  |
| 37079828 | 20332355 | 9454455  | 5211767  | 13347252 | 65652891 | 95669126 | 51886115 | 13430132 | 19665321 |
| 12763949 | 8299880  | 3337759  | 3525104  | 8186946  | 28438138 | 21537519 | 9811596  | 2850680  | 10420467 |
| 203976.9 | 59112.8  | 131919.2 | 131102   | 104756.7 | 456426.5 | 209203.6 | 295054.7 | 204613   | 216425.2 |
| 1025485  | 1151110  | 32561.92 | 289399.1 | 836656.4 | 2231593  | 1612088  | 1042176  | 176846.6 | 261396.1 |
| 537495.8 | 305608.4 | 178738.5 | 186964.1 | 110539.2 | 1216409  | 943997.4 | 789931.9 | 29204.32 | 482547   |
| 238063.8 | 112803.4 | 91960.75 | 282709.5 | 228928.2 | 184537.4 | 389017.1 | 371273   | 96370.11 | 152567.7 |
| 308287.6 | 111254.7 | 180984.2 | 228255.8 | 48341.41 | 310277   | 749280.3 | 397651.1 | 215019   | 209666.5 |
| 629076.1 | 407519   | 181567.3 | 79862.05 | 310197.9 | 1156105  | 1357804  | 517537.6 | 159954.3 | 368802.7 |
| 388791.9 | 279642.9 | 24927.6  | 36909.03 | 84554.62 | 1268656  | 478824   | 458396.5 | 20301.1  | 194000.3 |
| 4090774  | 3019983  | 1067022  | 605229.8 | 2552228  | 9245107  | 6587639  | 5911039  | 455399.8 | 1520001  |
| 183834.4 | 128397.8 | 85213.72 | 97539.7  | 96183.49 | 142077.5 | 480962.8 | 312960.4 | 19893.47 | 78470.86 |
| 174385.2 | 138220.8 | 52773.68 | 35894.1  | 31820.63 | 276977.9 | 455592.3 | 281467.3 | 10170.44 | 64712.54 |
| 346823.5 | 259049.6 | 82893.09 | 65130.18 | 110507.5 | 423988.7 | 1012889  | 684476.7 | 52578.89 | 315137.9 |
| 588897.6 | 450981.9 | 287554.9 | 363991.6 | 729886   | 116428.4 | 1392303  | 449838   | 392759.9 | 336140   |
| 554123.5 | 340697.6 | 164327   | 197576.8 | 374538.3 | 938477.6 | 1140705  | 802281.5 | 102602.9 | 283755.9 |
| 2975957  | 2919643  | 657620.3 | 33408.6  | 2046836  | 2278219  | 9482417  | 2845092  | 248320.8 | 1470973  |
| 586169.8 | 370308   | 96411.36 | 43120.41 | 163855.7 | 1366678  | 1322948  | 643452.2 | 39546.6  | 435244.3 |
| 1146589  | 765396.6 | 184899.1 | 41333.42 | 438845.8 | 3011160  | 1937020  | 2055377  | 212188.7 | 547878   |
| 1104008  | 807088.2 | 925032   | 875644.1 | 189885.3 | 1550032  | 1898140  | 833518   | 112216.7 | 721054.8 |
| 167519   | 133914.4 | 76033.39 | 46330.94 | 212428.4 | 15926.65 | 505731.8 | 148508   | 87546.57 | 348397.3 |
| 32989735 | 36647075 | 1072794  | 686394.7 | 13822585 | 715899.3 | 1.43E+08 | 45477271 | 178840.6 | 3564001  |
| 8662842  | 6813754  | 8605.019 | 7269.885 | 161108.2 | 10939984 | 31019398 | 14537468 | 749442.2 | 7463092  |
| 5790703  | 3976769  | 832587.1 | 365507.5 | 2680022  | 12384673 | 12138580 | 4728354  | 951642.2 | 4166571  |
| 1478463  | 655051.8 | 1564861  | 753260.4 | 3264380  | 604288.6 | 1300509  | 2392720  | 553390.5 | 1377207  |
| 1897874  | 1014761  | 981139.4 | 943990.2 | 1227733  | 3753374  | 2704809  | 2390087  | 730887.3 | 993175.5 |
| 111603.1 | 79292.02 | 59135.57 | 65394.89 | 69584.7  | 163566.2 | 192705.9 | 111246.4 | 40448.65 | 51905.55 |
| 1326205  | 1299224  | 139798.4 | 43483.64 | 788334.6 | 542116.6 | 4933301  | 1223757  | 196495.7 | 251349.4 |
| 18501547 | 8265760  | 3908628  | 2408622  | 9525758  | 36935175 | 41281226 | 22538923 | 5198461  | 15967594 |
| 181505.1 | 137692.9 | 37818.41 | 40293.53 | 85559.38 | 310226.6 | 450873   | 279043.9 | 11388.42 | 51611.99 |
| 200871.6 | 99048.07 | 157237.2 | 225043   | 230366.8 | 206686.5 | 192786.1 | 128722.5 | 157104.7 | 269830.9 |
| 2817221  | 1821925  | 233419.9 | 135991.6 | 270237.3 | 899637.6 | 12990104 | 5282602  | 1528834  | 3645320  |
| 2274142  | 1421390  | 377827.2 | 393647.9 | 1206098  | 4077115  | 5124931  | 4203632  | 345776.7 | 1667254  |
| 389753.3 | 49261.02 | 62855.52 | 642536.9 | 478366.3 | 399657.4 | 349284.3 | 386910.4 | 323299.8 | 368045.1 |
| 688642   | 126565.3 | 451788.6 | 596836.8 | 971199.2 | 837225   | 568470.7 | 628436.1 | 612645   | 598920.4 |
| 554709.1 | 357986.6 | 188095.9 | 151471.9 | 194442   | 784978.5 | 1407978  | 644563.2 | 177167.3 | 426332.8 |
| 20073880 | 17490212 | 5876835  | 16444144 | 32074569 | 18220335 | 29206258 | 42690591 | 6417994  | 87261.05 |
| 733724.6 | 753214.9 | 33162.7  | 30839.36 | 747983.8 | 414442.8 | 2532934  | 223195.8 | 0        | 538663   |
| 380436.2 | 236824.3 | 53169.93 | 105206.3 | 217070.6 | 757674.6 | 799039.8 | 353113   | 60093.93 | 266239   |
| 182840.8 | 104068   | 100556.6 | 97065.24 | 131131   | 229982   | 345384.2 | 234245.4 | 90281.3  | 80333.02 |
| 932961.4 | 616510.7 | 130457.5 | 163859.1 | 490741.6 | 1448664  | 2512470  | 1422870  | 119527.6 | 466967.4 |
| 1711020  | 994136.3 | 241373.6 | 228257.5 | 159957.1 | 5045116  | 2720761  | 2501597  | 277943.1 | 1057445  |

|          |          |          |          |          |          |          |          |          |          |
|----------|----------|----------|----------|----------|----------|----------|----------|----------|----------|
| 181053.2 | 190746.6 | 14091.09 | 14094.48 | 52474.34 | 521025   | 323187.2 | 248368   | 0        | 43903.63 |
| 560663.7 | 347222.1 | 366218.6 | 380115.3 | 201309.4 | 365468.6 | 1449846  | 801945.3 | 194292.8 | 423412.5 |
| 297491.6 | 238464.8 | 103396.6 | 115805.3 | 102851.1 | 578971.8 | 609619.1 | 582764.5 | 15294.84 | 138143.1 |
| 3126749  | 2355277  | 311365.1 | 141731.5 | 965355.5 | 7084748  | 6856456  | 4219623  | 315181.7 | 1755222  |
| 399042.9 | 343152.3 | 17600.01 | 11402.09 | 57559.66 | 532845.8 | 1333945  | 818210.9 | 69052.66 | 196865.7 |
| 61705.2  | 40715.31 | 20268.19 | 34723.99 | 12234.44 | 163594.6 | 82354.74 | 117153.2 | 21216.6  | 54356.95 |
| 1142076  | 2553760  | 0        | 0        | 1512267  | 1603048  | 2421540  | 0        | 0        | 0        |
| 3177199  | 2519354  | 44133.59 | 41102.25 | 293632.3 | 7405324  | 8410366  | 3604741  | 483038.4 | 1716531  |
| 2996821  | 3033393  | 117997.2 | 89813.88 | 842426.3 | 7336690  | 6311908  | 1604663  | 36052.3  | 929492.1 |
| 484316.9 | 322809.7 | 62551.83 | 28211.47 | 194611.3 | 1108295  | 990152   | 460143.6 | 42136.07 | 345169.9 |
| 1215260  | 870067.5 | 777310   | 842175   | 1787213  | 1688210  | 920848.9 | 2323420  | 71598.4  | 1796740  |
| 283852.8 | 167204.6 | 207273   | 209677.5 | 159233.2 | 211152.7 | 616864.8 | 497138.5 | 130459.1 | 167337.4 |
| 721216.3 | 408874.1 | 124359.1 | 58872.43 | 323323.9 | 1882074  | 1163933  | 670111.3 | 166503.2 | 556385   |
| 118636.2 | 65780.71 | 0        | 0        | 24401.25 | 31105.33 | 523231.2 | 149971.5 | 62399.45 | 92577.59 |
| 732540.9 | 507621.9 | 507749.5 | 650019.1 | 550236.7 | 313947.9 | 1684477  | 1456258  | 302418.9 | 232273   |
| 172883.1 | 127993.8 | 5763.08  | 6155.236 | 116379.1 | 438680.6 | 311085.7 | 194825.4 | 19824.79 | 62942    |
| 28608477 | 27327590 | 88755.34 | 15912.67 | 814224.3 | 31864084 | 1.07E+08 | 34754853 | 3488566  | 999970.7 |
| 3084466  | 1988388  | 331586.9 | 226912.1 | 1578643  | 8753072  | 4293856  | 5729457  | 482288.6 | 2157885  |
| 1316608  | 944569.3 | 323805.7 | 179048.1 | 810828.1 | 2857278  | 2500834  | 1225225  | 157711.3 | 788724.5 |
| 142076.6 | 168098.9 | 0        | 0        | 10693.02 | 64525.14 | 617196.6 | 126469.8 | 6122.827 | 150365.8 |
| 1677955  | 1055172  | 142300.3 | 60928.81 | 510018   | 4054596  | 3495768  | 2499819  | 301850.4 | 1035043  |
| 326243.5 | 255985.5 | 6373.763 | 2686.265 | 15354.18 | 440347.3 | 1135514  | 565448.4 | 30028.59 | 245126.5 |
| 1892316  | 1261317  | 198774.4 | 125413.5 | 673957.5 | 3664896  | 4661077  | 3067033  | 169183.6 | 1499973  |
| 199680.2 | 148883.1 | 14641.35 | 13279.45 | 20028.41 | 322086.9 | 645866.7 | 320227.3 | 8973.634 | 80140.88 |
| 108802.6 | 77299.4  | 45288.92 | 0        | 58891.02 | 251755.3 | 195218.7 | 68797.79 | 12018.94 | 98665.57 |
| 132788.3 | 109566.1 | 2735.182 | 3520.317 | 6458.595 | 117358.1 | 520464   | 281184.8 | 18884.75 | 70644.98 |
| 288844.3 | 202617.7 | 32686.9  | 17351.69 | 179136.8 | 620536.4 | 575597.6 | 483073.3 | 29802.74 | 152775.1 |
| 38640738 | 33057747 | 2002561  | 888821.5 | 21953815 | 23545813 | 1.49E+08 | 46192416 | 1521699  | 8113800  |
| 493603.8 | 418681.1 | 90762.21 | 101282.7 | 113379.8 | 599178.5 | 1604499  | 770435   | 49509.78 | 337821.8 |
| 526303   | 480378.5 | 86771.38 | 25773.08 | 524740.2 | 364955.7 | 1587748  | 391775.4 | 0        | 193094.5 |
| 2838107  | 2715162  | 0        | 0        | 4256.28  | 3726139  | 10189907 | 4942184  | 544320   | 2020817  |
| 346949.5 | 312491.7 | 211138.2 | 15552.36 | 165260.4 | 329761.9 | 1038599  | 859711.4 | 112203.5 | 199237.4 |
| 287897.9 | 212865.3 | 21207.56 | 16554.03 | 110410.4 | 465507.1 | 805489.6 | 620244.8 | 62994.62 | 207501.3 |
| 2108109  | 368956.7 | 1762697  | 2228903  | 2562391  | 1574584  | 2439955  | 2719975  | 1876750  | 1788669  |
| 458324.5 | 315811.8 | 295123.2 | 122922.6 | 484202.1 | 281297.6 | 1083884  | 939004.7 | 132927.7 | 242788.2 |
| 222903.6 | 235172.7 | 82591.88 | 54271.07 | 107555.5 | 503227.7 | 351750.8 | 98658.41 | 19123.88 | 88333.02 |
| 5037109  | 4542609  | 956224.9 | 681653.5 | 4671832  | 2055861  | 16424700 | 2663743  | 1390091  | 1620013  |
| 234932.4 | 235526.5 | 13759.76 | 21729.48 | 10205.29 | 412375.6 | 736439.4 | 227644.9 | 69188.46 | 174626.1 |
| 239308.4 | 288583.9 | 46265.03 | 38040.42 | 36130.62 | 332363.7 | 723445.2 | 751717   | 116118   | 53814.67 |
| 5826922  | 5064888  | 2429840  | 526850.7 | 3597011  | 16644230 | 6325797  | 11982631 | 291538.7 | 1588495  |
| 859076.7 | 222425.9 | 377718.4 | 553248.5 | 434225   | 1850542  | 1047920  | 571221.6 | 1175002  | 847994.7 |
| 1773963  | 1403030  | 0        | 0        | 30575.1  | 2347650  | 6345785  | 2884089  | 183443.2 | 1472588  |
| 162227.5 | 99451.59 | 34507.32 | 59344.53 | 73272.5  | 398610.1 | 236803.4 | 268941.8 | 29588.37 | 91240.82 |
| 215931.5 | 193963.9 | 70074.47 | 39261.08 | 212780.3 | 475398.1 | 270077.2 | 170198.5 | 31771.2  | 92288.1  |
| 403182.6 | 563859.6 | 64045.22 | 62047.54 | 132742.8 | 156868.8 | 1641313  | 1362451  | 0        | 197830.5 |
| 146295.1 | 94417.94 | 6574.044 | 6712.313 | 37990.16 | 185167.7 | 505827.6 | 275535   | 22545.11 | 98382.08 |
| 549521.1 | 247780.1 | 279716.2 | 335858   | 384400.9 | 1024553  | 704827.7 | 592091.8 | 238684.7 | 385483.3 |

|          |          |          |          |          |          |          |          |          |          |
|----------|----------|----------|----------|----------|----------|----------|----------|----------|----------|
| 2358778  | 1639958  | 325468.1 | 183966.9 | 1602599  | 6276652  | 3267670  | 4226126  | 279595.5 | 1056559  |
| 971737.9 | 984461.9 | 0        | 3581.333 | 49236.33 | 867969   | 3849891  | 1944210  | 9289.443 | 689539.9 |
| 134576.4 | 102699.9 | 0        | 0        | 7366.609 | 87336.51 | 565974.2 | 107719.1 | 91247.17 | 196269   |
| 1155378  | 536524.6 | 974041.9 | 921581.9 | 1091241  | 1134598  | 1683515  | 2024151  | 664046.5 | 1171901  |
| 4402898  | 3249809  | 717862.1 | 355095.1 | 2055154  | 10440605 | 8700835  | 3087816  | 795573.6 | 2682974  |
| 473980.7 | 356169.7 | 96584.56 | 142638.6 | 134184.1 | 834906.4 | 1188565  | 764935.6 | 19019.39 | 157918.5 |
| 332681   | 291894.8 | 0        | 4981.735 | 146831.8 | 267835.2 | 1218198  | 563881.5 | 13474.7  | 298273.3 |
| 2060013  | 2200441  | 90980.53 | 15192.01 | 896989.1 | 1135143  | 8341685  | 995226.4 | 325002.9 | 995781.3 |
| 1007679  | 1022014  | 0        | 3664.756 | 63411.07 | 919175.6 | 3965994  | 1866227  | 0        | 701538.6 |
| 121171.4 | 173478.4 | 6363.115 | 0        | 49643.48 | 394486.2 | 165624.3 | 80477.7  | 34849.31 | 6216.507 |
| 572859.3 | 447185.1 | 65090.17 | 94453.82 | 218015.6 | 795529.1 | 1726533  | 980524.5 | 46652.03 | 134744.7 |
| 180967.6 | 180328.6 | 2607.892 | 4471.034 | 0        | 142236   | 740021.4 | 306360.9 | 10953.19 | 154348.4 |
| 1948123  | 1027649  | 58749.14 | 24879.39 | 287411.5 | 3632235  | 5622700  | 2589855  | 307050.5 | 1563145  |
| 1154864  | 1487638  | 324978.6 | 100414.8 | 1622933  | 347392.5 | 3297955  | 3740811  | 103727.7 | 240161.6 |
| 162926.5 | 96364.12 | 49210.28 | 3875.368 | 197653.3 | 58811.05 | 514424.8 | 271855.5 | 14253.19 | 137289.5 |
| 403663.7 | 293549.1 | 6335.476 | 2439.741 | 125505   | 634566.5 | 1224945  | 577050.3 | 67775.4  | 207524.7 |
| 6648872  | 3953918  | 424269.3 | 332518.1 | 617203.2 | 9643895  | 22635670 | 9166896  | 3560869  | 10444900 |
| 78983.76 | 62904.9  | 3349.689 | 0        | 10836.9  | 163064   | 213064.5 | 126493.5 | 5177.587 | 31635.23 |
| 5030724  | 3171419  | 796795.9 | 356529.8 | 2187296  | 11803226 | 10252130 | 4892585  | 735491.6 | 3466623  |
| 3859417  | 3281356  | 8937.186 | 6784.977 | 94120.83 | 4513090  | 14932179 | 6287237  | 223053.3 | 3055567  |
| 173922.5 | 127051.1 | 10039.04 | 13799.82 | 80467.86 | 422622.9 | 334659.7 | 231597.1 | 11096.11 | 69642.91 |
| 116259.8 | 81642.72 | 16134.3  | 5861.655 | 23731.75 | 257165.9 | 283981.3 | 166633.1 | 5716.005 | 52095.27 |
| 3444537  | 5722012  | 6821.173 | 0        | 0        | 1468822  | 15448900 | 13540155 | 36063.26 | 0        |
| 296224.2 | 93048.89 | 99842.98 | 92961.79 | 89756.12 | 747009   | 441051.3 | 162725   | 404635.5 | 248909   |
| 5350166  | 4594148  | 10518.66 | 5697.967 | 43503.12 | 6587895  | 20439173 | 9288904  | 450558.3 | 4110359  |
| 97665.21 | 60306.03 | 2507.84  | 7197.854 | 15201.03 | 285343.2 | 182770.9 | 107911.5 | 15520.88 | 63169.12 |
| 1452109  | 987272.3 | 303225   | 79007.93 | 622825   | 3649713  | 2545661  | 2368127  | 590275.7 | 1004210  |
| 73246.04 | 68447.01 | 0        | 0        | 7903.079 | 216220.7 | 146010.7 | 89959.92 | 0        | 11153.24 |
| 17216949 | 16618621 | 12962094 | 8097368  | 34173597 | 4931986  | 25275449 | 41992681 | 53701.33 | 25473977 |
| 1261532  | 1060052  | 163033.7 | 187404.4 | 197891.9 | 2504656  | 3310288  | 1875213  | 60415.36 | 383661.6 |
| 1909801  | 1295828  | 318261.3 | 125186.3 | 632367.2 | 4583617  | 3815103  | 1984447  | 277242.9 | 1086616  |
| 102783.4 | 80098.19 | 41651.63 | 27006.28 | 59801.07 | 144664   | 237295.4 | 153710.5 | 24220.72 | 52509.23 |
| 83430.88 | 73557.72 | 0        | 2683.991 | 0        | 12801.4  | 407417.4 | 59901.82 | 8700.781 | 49115.92 |
| 456523.6 | 258412.5 | 244905.7 | 211822.6 | 139732.9 | 841065.3 | 832484.9 | 505436.3 | 108658.2 | 320504.6 |
| 51869375 | 33751863 | 12159416 | 15448976 | 43317385 | 1.03E+08 | 87427005 | 63186590 | 7365909  | 29472444 |
| 308859.2 | 263149.5 | 156532.7 | 212097.7 | 174536.7 | 461478.1 | 548820.3 | 178426.6 | 146088.4 | 112384.1 |
| 5891224  | 3109454  | 1667635  | 2028628  | 3908507  | 9182129  | 12506050 | 6438362  | 1886082  | 3783639  |
| 20374531 | 41517042 | 667916.7 | 295579.7 | 1896549  | 8448075  | 92200409 | 94523251 | 5902120  | 703676.6 |
| 1602647  | 1190832  | 552850.1 | 451986.6 | 1032476  | 2982522  | 2944101  | 613181.8 | 182624.6 | 1733555  |
| 265073.6 | 34338.45 | 137919.7 | 302970.6 | 272447.5 | 479568.9 | 136616   | 268711.8 | 207045.6 | 270836.1 |
| 212602.7 | 116194.1 | 73670.31 | 105647.6 | 48763.14 | 146759.5 | 680139.9 | 316684.7 | 40475.06 | 165428.2 |
| 8842229  | 1698250  | 1987909  | 5076254  | 9179549  | 17315492 | 10485949 | 6897193  | 8505241  | 8909347  |
| 10700886 | 6576188  | 2288351  | 2605034  | 5121175  | 14884032 | 28258611 | 17011289 | 1571250  | 6153903  |
| 1406658  | 1289409  | 102657.5 | 85557.68 | 430076.1 | 1210122  | 5271951  | 1538472  | 0        | 275609.6 |
| 4070127  | 3496096  | 2369362  | 1986966  | 2875916  | 9196048  | 4038836  | 4362987  | 676671.3 | 1634213  |
| 571387.2 | 580643.6 | 0        | 13315.2  | 81564.18 | 816491   | 1920300  | 668140.8 | 0        | 140392.4 |
| 337687.9 | 227502   | 74980.14 | 106116.7 | 228522.7 | 588120.4 | 681798   | 419547.8 | 84221.01 | 110086   |

|          |          |          |          |          |          |          |          |          |          |
|----------|----------|----------|----------|----------|----------|----------|----------|----------|----------|
| 52212620 | 30965114 | 13046037 | 11774556 | 35866971 | 1.07E+08 | 94783788 | 65087328 | 8948373  | 30866998 |
| 460864.5 | 246985.6 | 157144.6 | 116850   | 270867.5 | 911154.1 | 859507.7 | 798146.7 | 140349   | 326860   |
| 8303616  | 5529887  | 992825   | 1086929  | 5282273  | 22063089 | 11841242 | 12882267 | 777983.3 | 4047787  |
| 3350117  | 3284108  | 117725.7 | 32286.91 | 948836.2 | 8264067  | 7266105  | 1904887  | 87464.82 | 1101072  |
| 190268.9 | 135378.7 | 4193.707 | 7407.127 | 72595.46 | 457368.5 | 403699.2 | 269995.9 | 9878.053 | 143059.8 |
| 2808890  | 402721.9 | 623641.4 | 543434.8 | 1813454  | 6686596  | 4313789  | 2598788  | 3491358  | 2806679  |
| 222396.6 | 184703.6 | 10661.75 | 21389.92 | 26055.76 | 645989.5 | 415872.9 | 443323.8 | 4205.569 | 58531.33 |
| 934662.6 | 567880.6 | 1003222  | 1103304  | 312342.9 | 1689517  | 547183.6 | 1661634  | 928797.9 | 89202.3  |
| 1422317  | 572551.9 | 664379.7 | 892756.2 | 972898.1 | 2903069  | 1654365  | 1538726  | 754741.6 | 1068737  |
| 216660.5 | 131920.6 | 102870.4 | 103225.6 | 95484    | 343507.8 | 433603.5 | 273790.6 | 15651.3  | 192762.3 |
| 995833.6 | 455315   | 553186.1 | 1572750  | 1428366  | 806335.3 | 603970.5 | 568633.1 | 1280355  | 1636227  |
| 322344.2 | 272291.4 | 3488.083 | 2353.638 | 84242.3  | 693548.6 | 838959.8 | 430936.3 | 68145.42 | 162228.3 |
| 952849.5 | 556022.4 | 83212.26 | 156408.5 | 1094307  | 1235095  | 2173626  | 807212.1 | 58629.73 | 1159948  |
| 698733.7 | 816661.4 | 104202.5 | 59501.69 | 379377.5 | 531707.4 | 2392912  | 510994.3 | 109200.6 | 198821   |
| 329846.4 | 175853.1 | 233092.7 | 220633   | 170459.1 | 427947.9 | 592038.4 | 305769.7 | 164742   | 226804.6 |
| 596310   | 563948.2 | 32380.53 | 36305.43 | 100168.1 | 1191382  | 1640451  | 604156.8 | 26321.11 | 82426.81 |
| 1191141  | 1202864  | 28732.12 | 51890.14 | 949739.5 | 126971.5 | 4754398  | 3087144  | 1455747  | 1073632  |
| 182724.1 | 116357.7 | 14413.81 | 0        | 58271.36 | 386297.6 | 459249.7 | 235418.7 | 18898.4  | 116032   |
| 841561   | 623975.2 | 473993.1 | 28846.6  | 795288.5 | 429967.1 | 2500085  | 1516461  | 273070.3 | 518506.4 |
| 3225859  | 5419254  | 10368.96 | 0        | 0        | 1337618  | 14922211 | 12806927 | 10955.76 | 0        |
| 2680899  | 1684616  | 314003.8 | 148788.6 | 695695.2 | 6800280  | 5505790  | 2816397  | 406802.4 | 1924482  |
| 1139537  | 321528.7 | 866948.8 | 901556.5 | 1117960  | 1503343  | 1314609  | 1083664  | 931760.2 | 1114215  |
| 151946.6 | 226992.2 | 99379.82 | 205743.9 | 30205.06 | 264119.6 | 164160.7 | 553448.1 | 55086.88 | 14515.51 |
| 708092.5 | 385475.4 | 315864.9 | 1154084  | 957356.5 | 664278.3 | 441009.6 | 338389.4 | 837018.6 | 1296160  |
| 245536.8 | 211346.9 | 0        | 0        | 0        | 699426.1 | 534143.3 | 295758.1 | 0        | 49344.96 |
| 278634.7 | 250075.7 | 12012.48 | 4741.096 | 20041.26 | 36644.41 | 1328779  | 665925.8 | 71541.44 | 215329.9 |
| 294323.8 | 298998.5 | 3025.928 | 0        | 35435.93 | 127911.2 | 1314095  | 553222.1 | 52122.14 | 144791.3 |
| 231321.4 | 360362   | 3033.499 | 0        | 3627.681 | 321494.1 | 834798.2 | 117153.6 | 12306.57 | 74234.92 |
| 457699.4 | 287489.9 | 92613.21 | 117621.5 | 517096.8 | 625817.9 | 940660.1 | 298475.4 | 45853.36 | 547838.9 |
| 384658.5 | 292239.6 | 222723   | 393632.2 | 262748.6 | 594399.2 | 446310.8 | 887324.9 | 265428.4 | 314621.5 |
| 165604.3 | 115118.7 | 17530.79 | 3544.113 | 48226.32 | 374882.7 | 386215.9 | 200938   | 0        | 101155.6 |
| 514147   | 310516.8 | 86671.27 | 33399.88 | 256978.2 | 1222527  | 964709.5 | 840448.8 | 104511.3 | 272273.2 |
| 69878146 | 61780742 | 52337.09 | 48977073 | 148785.6 | 3.01E+08 | 217238.3 | 1.17E+08 | 16139589 | 91316.84 |
| 2216556  | 1384483  | 563327   | 995700.4 | 3164981  | 1224852  | 5154170  | 3298797  | 17991.29 | 3476713  |
| 4333266  | 4386071  | 3903115  | 2173813  | 7406420  | 1126665  | 7019817  | 10898084 | 22789.22 | 6566085  |
| 499171.7 | 372554.2 | 42558.01 | 38393.44 | 338819.6 | 1069223  | 1011227  | 799749.3 | 9776.407 | 189290.2 |
| 337116.7 | 164110   | 134762.6 | 138835.8 | 127238.1 | 568705.4 | 718310.2 | 323265.3 | 162068.6 | 250000.6 |
| 34086318 | 31381520 | 1673639  | 1044749  | 19222611 | 1.06E+08 | 42534127 | 83450594 | 1871037  | 21094646 |
| 16291768 | 34629205 | 3408282  | 3419582  | 4981048  | 35673501 | 34180648 | 50655.37 | 3026541  | 42543.35 |
| 581916   | 793323.3 | 8222.87  | 5450.193 | 17499.65 | 927193.7 | 1957171  | 370023.3 | 39673.76 | 279926.5 |
| 6366191  | 3703177  | 1056085  | 499364.5 | 2665231  | 13411426 | 14233722 | 6853255  | 986062.2 | 4686969  |
| 2473038  | 2293765  | 929953.2 | 177641   | 1621986  | 7071157  | 2549686  | 5862191  | 55586.5  | 762495.1 |
| 2733417  | 1924473  | 415672.7 | 453410.9 | 1253003  | 7124109  | 4406438  | 4164754  | 278083.3 | 1073764  |
| 2047931  | 1399638  | 474736.7 | 1059400  | 1851938  | 3823011  | 3022814  | 4356124  | 620365.1 | 2087525  |
| 29500318 | 22777040 | 237642.1 | 89177.16 | 1143741  | 12368956 | 1.33E+08 | 64831646 | 2608787  | 20299634 |
| 636272.5 | 576144.5 | 2030472  | 390743.3 | 383069.9 | 319894.6 | 60526.57 | 1124564  | 232249.4 | 165374   |
| 518993.5 | 104282.2 | 440884.8 | 612390.2 | 577278.6 | 582775   | 381310.2 | 436657.3 | 471043.7 | 460049   |

|          |          |          |          |          |          |          |          |          |          |
|----------|----------|----------|----------|----------|----------|----------|----------|----------|----------|
| 1568065  | 1975227  | 126872.7 | 46660.08 | 95814.37 | 278050.4 | 7301072  | 4046294  | 253708.4 | 4657.63  |
| 2109114  | 1450028  | 267172.9 | 227242   | 1019697  | 5680300  | 3356481  | 3641615  | 221426   | 985442.7 |
| 2000767  | 2434905  | 1678714  | 1051923  | 4169834  | 338010.3 | 2760160  | 5551833  | 0        | 3532523  |
| 1712248  | 894761.8 | 149500.9 | 67717.08 | 7206778  | 676894.5 | 454972.5 | 865697.2 | 2749748  | 1404752  |
| 191125.1 | 172801.2 | 113306.6 | 106154   | 91674.71 | 113401.7 | 530733.6 | 493605.2 | 57039.85 | 139942.5 |
| 176566.7 | 136179.4 | 48771.89 | 68808.41 | 51216.46 | 340778   | 373539.7 | 352449   | 10526.65 | 91125.32 |
| 550092.3 | 565488.2 | 8211.011 | 0        | 20230.47 | 433474.9 | 2287528  | 790095.2 | 5850.253 | 505325.4 |
| 266046.2 | 86734.44 | 165754.6 | 354194   | 335429.1 | 202126.5 | 272626.3 | 339943.9 | 137649.1 | 259792.2 |
| 1772308  | 1771005  | 2984.013 | 3002.911 | 102705.1 | 1610030  | 7139957  | 3418562  | 56169.74 | 1217780  |
| 568210.7 | 418498.7 | 67405.71 | 78203.05 | 162368.5 | 261478.5 | 2270792  | 1206232  | 162202.5 | 476992.3 |
| 78734.94 | 45797.27 | 23847.83 | 178481.1 | 103348.9 | 41111.81 | 46939.7  | 47092.04 | 80649.03 | 156091.5 |

| HUVEC_11 | HUVEC_11 | isotopes     | adduct     | pcgroup |
|----------|----------|--------------|------------|---------|
| 49488    | 48268.17 |              | [2M+Na+K]  | 178     |
| 17160.25 | 39470.41 |              |            | 309     |
| 672201   | 717337.1 |              | [M+H]+ 55  | 31      |
| 451366.5 | 633132.4 |              |            | 107     |
| 3003672  | 3709061  |              | [M+H]+ 30  | 311     |
| 68901.41 | 153732.3 |              | [M+H-C2H4  | 172     |
| 0        | 6847.204 |              | [M+H+HCC   | 178     |
| 15909701 | 18829170 |              | [M+H-CH2]  | 311     |
| 117989.7 | 196869.3 |              | [M+H-CO2]  | 17      |
| 10596.44 | 10377.64 |              |            | 83      |
| 158445.6 | 170819.8 |              |            | 341     |
| 1941145  | 1874515  |              | [M+H]+ 19  | 44      |
| 303402.2 | 263656.3 | [1551][M+2]+ |            | 100     |
| 13549819 | 18319384 |              | [M+H-NH3]  | 316     |
| 6975795  | 3279346  |              |            | 316     |
| 244421.2 | 137793.6 | [1575][M+1]+ |            | 100     |
| 232091.4 | 130105.9 |              | [M+2H]2+ ! | 23      |
| 119136.2 | 124377.2 |              |            | 208     |
| 186898.5 | 185539.3 |              |            | 96      |
| 5542.55  | 14464.69 |              | [M+K+NH3   | 178     |
| 202616.8 | 130382.7 |              |            | 475     |
| 1954778  | 1739334  | [849][M]3+   |            | 282     |
| 3594371  | 2132078  | [1462][M+2]+ |            | 100     |
| 80840.02 | 98330.09 |              |            | 316     |
| 164002.7 | 268232.1 |              |            | 172     |
| 653329.3 | 99961.67 | [1355][M+4]+ |            | 25      |
| 224357.9 | 140511.3 |              | [M+Na]+ 3  | 100     |
| 741599.2 | 402857.1 |              |            | 228     |
| 979838.8 | 516171.5 | [1529][M+1]+ |            | 100     |
| 632383   | 556767.9 | [1579][M+3]+ |            | 100     |
| 113470.2 | 173536.2 |              |            | 275     |
| 173503.6 | 88168.21 |              | [M+Na+HC   | 29      |
| 2286709  | 1598070  |              | [M+H]+ 19  | 309     |
| 89190.85 | 60881.72 |              |            | 103     |
| 279960.1 | 597216.1 |              |            | 88      |
| 53840.1  | 15890.74 | [41][M+1]+   |            | 221     |
| 63994209 | 35171300 | [1380][M]+   |            | 183     |
| 14539985 | 11137496 |              |            | 245     |
| 88705.03 | 107551.1 |              | [2M+Na+K]  | 95      |
| 6295340  | 5521796  |              | [M+H]+ 33  | 245     |
| 86436.41 | 126086.8 |              | [M+K]+ 34  | 47      |
| 585752.4 | 282064.6 |              | [3M+2H]2+  | 75      |
| 213122.2 | 123569   | [716][M]+    |            | 24      |
| 113566.7 | 171201   |              |            | 277     |
| 490130.1 | 1120859  |              |            | 250     |
| 32740.45 | 267793.6 | [455][M+1]+  |            | 100     |

|          |          |                                  |     |
|----------|----------|----------------------------------|-----|
| 1200021  | 725767.6 | [1294][M] <sup>2</sup> [3M+Na+K] | 202 |
| 85863.49 | 168727.2 |                                  | 243 |
| 256581.2 | 175932.9 | [299][M]+ [M+H]+ 31!             | 103 |
| 1914945  | 860133.6 |                                  | 257 |
| 26215.58 | 32127.28 |                                  | 83  |
| 86643308 | 40152196 | [1164][M]+ [M+Na+NH              | 153 |
| 34155916 | 17980591 |                                  | 100 |
| 410684.7 | 327174.7 | [173][M+1]+                      | 31  |
| 6119713  | 4685887  | [261][M]+                        | 100 |
| 85122.56 | 26102.99 | [M+Na+Na                         | 29  |
| 4747127  | 7795382  |                                  | 395 |
| 2421930  | 2658677  | [M+Na]+ 2!                       | 192 |
| 46072.07 | 36862.44 | [122][M+1]+                      | 49  |
| 26186907 | 11868560 | [1243][M+1]+                     | 156 |
| 49495856 | 33948702 | [430][M]+ [M+K]+ 31!             | 100 |
| 25833662 | 11971732 | [1315][M+1]+                     | 183 |
| 25412719 | 16452647 | [569][M+1]+                      | 100 |
| 646474.5 | 1709232  | [566][M]+                        | 14  |
| 244063.8 | 315063.4 | [M+Na]+ 5!                       | 119 |
| 1982646  | 1939491  | [M+H]+ 17!                       | 199 |
| 37436.72 | 55471.6  |                                  | 95  |
| 156346.6 | 275551.8 | [M+H-COCl                        | 49  |
| 82632156 | 37684852 | [1243][M]+                       | 156 |
| 577715.7 | 604567.8 | [M+H]+ 35!                       | 245 |
| 4573607  | 2114903  | [M+H+HCC                         | 40  |
| 146538.5 | 731677.8 | [122][M+2]+                      | 49  |
| 566062.6 | 341268.5 | [1053][M]+ [M+H+NH <sub>3</sub>  | 376 |
| 511284.3 | 784047.9 | [290][M]+                        | 104 |
| 32958.9  | 50235.53 | [791][M+2]+                      | 95  |
| 73376.02 | 135753.4 | [1053][M+1]+                     | 376 |
| 65280.71 | 389089   | [2M+Na+K]                        | 83  |
| 900307.4 | 409671.3 | [M+2H] <sup>2+</sup> !           | 25  |
| 1831708  | 1005293  |                                  | 100 |
| 12236.07 | 9892.608 |                                  | 172 |
| 73881827 | 36207195 | [1046][M]+ [M+K+NH <sub>3</sub>  | 40  |
| 1133570  | 494698   | [530][M+1]+                      | 104 |
| 76308171 | 35749864 | [1315][M]+ [M+K+NH <sub>3</sub>  | 183 |
| 35141563 | 32943829 | [464][M]+ [2M+K]+ 1!             | 160 |
| 408373.8 | 211940.6 |                                  | 466 |
| 206115.3 | 34140.37 | [1184][M]+ [M+2Na-H]             | 60  |
| 4494179  | 2255981  | [1019][M+1]+                     | 100 |
| 166179.6 | 25464.36 | [M+H-CH <sub>4</sub> ]           | 60  |
| 575668   | 383623.5 | [122][M]+ [M+H-CH <sub>3</sub> ] | 49  |
| 1237484  | 694703.7 | [1323][M] <sup>2+</sup>          | 219 |
| 1815963  | 995538.8 | [M+K]+ 62!                       | 183 |
| 447075.8 | 392320.7 | [673][M]+ [M+K+CF <sub>3</sub> C | 79  |
| 517423.6 | 558650.6 | [898][M+1] <sup>3+</sup>         | 333 |

|          |          |                                                   |     |
|----------|----------|---------------------------------------------------|-----|
| 2420721  | 1172915  | [1549][M+2] <sup>+</sup>                          | 100 |
| 7963353  | 5060004  | [430][M+1] <sup>+</sup>                           | 100 |
| 368021   | 58661.57 | [M+K] <sup>+</sup> + 41                           | 24  |
| 1028416  | 807341.3 |                                                   | 193 |
| 157843.5 | 28634.37 |                                                   | 25  |
| 1649581  | 905344.6 |                                                   | 100 |
| 142226   | 133904.8 |                                                   | 25  |
| 495890.1 | 120766.1 |                                                   | 261 |
| 4608536  | 1863661  | [1243][M+2] <sup>+</sup>                          | 156 |
| 261939.9 | 1570514  |                                                   | 358 |
| 577927   | 431452.8 | [3M+2H] <sup>2+</sup>                             | 100 |
| 26104997 | 11104210 | [1164][M+1] <sup>+</sup>                          | 153 |
| 28903.74 | 49005.61 |                                                   | 95  |
| 13569087 | 5917447  | [1530][M] <sup>+</sup> + [M+H-COCl] <sup>+</sup>  | 100 |
| 56851.46 | 119961   | [673][M+1] <sup>+</sup>                           | 79  |
| 788254.4 | 749340.1 |                                                   | 230 |
| 368451   | 416060.1 |                                                   | 144 |
| 7539255  | 3351525  | [1530][M+1] <sup>+</sup>                          | 100 |
| 5909037  | 6177180  | [27][M] <sup>+</sup>                              | 199 |
| 1994025  | 2489693  |                                                   | 162 |
| 4108225  | 4407684  | [M+H-H <sub>2</sub> O] <sup>+</sup>               | 196 |
| 17376276 | 7430212  | [1367][M] <sup>+</sup> + [M+K] <sup>+</sup> + 66  | 100 |
| 3837735  | 8441635  |                                                   | 192 |
| 5479757  | 6351793  |                                                   | 277 |
| 2405661  | 2166806  | [970][M+2] <sup>+</sup>                           | 31  |
| 17842855 | 12624104 | [1193][M] <sup>+</sup> + [M+K] <sup>+</sup> + 56  | 100 |
| 1404870  | 762319   | [M+H-C <sub>2</sub> H <sub>4</sub> ] <sup>+</sup> | 316 |
| 263243.8 | 67699.15 | [1188][M+5] <sup>+</sup>                          | 25  |
| 704738.5 | 88715.04 | [M+K] <sup>+</sup> + 13                           | 316 |
| 195887.4 | 355792.4 | [2M+Na+2I] <sup>+</sup>                           | 49  |
| 7030327  | 3335953  |                                                   | 100 |
| 649678.5 | 667739   | [209][M+1] <sup>+</sup>                           | 120 |
| 1688428  | 1731782  |                                                   | 144 |
| 6928647  | 2909573  | [1367][M+1] <sup>+</sup>                          | 100 |
| 502682.8 | 80677.33 |                                                   | 150 |
| 9531594  | 11272683 | [62][M] <sup>+</sup>                              | 199 |
| 1961813  | 2092234  |                                                   | 404 |
| 5664865  | 4250163  | [1193][M+1] <sup>+</sup>                          | 100 |
| 11671990 | 15175280 | [M+Na] <sup>+</sup> + 3                           | 215 |
| 252599.1 | 91333    |                                                   | 18  |
| 689578.1 | 491203.6 | [234][M] <sup>+</sup>                             | 49  |
| 167375   | 228833.9 | [673][M+2] <sup>+</sup>                           | 79  |
| 10052988 | 8390038  | [M+H-CO <sub>2</sub> ] <sup>+</sup>               | 94  |
| 111723.9 | 10415.24 |                                                   | 55  |
| 2845762  | 3080376  |                                                   | 171 |
| 478716.1 | 293310.2 | [M+K] <sup>+</sup> + 36                           | 162 |
| 466328   | 395845   | [M+K] <sup>+</sup> + 94                           | 100 |



|          |          |                       |     |
|----------|----------|-----------------------|-----|
| 98076.28 | 151760.5 | [3M+H+K]2             | 95  |
| 1027609  | 514648.6 | [M+H+HCC              | 189 |
| 688455.8 | 827543.2 | [1367][M+4]+          | 100 |
| 1196260  | 2032794  |                       | 277 |
| 9218429  | 11743234 | [401][M]+ [M+2K-H]+   | 144 |
| 1.37E+08 | 78325923 | [569][M]+             | 100 |
| 270361.8 | 176899.9 |                       | 279 |
| 2396531  | 1262025  | [M+H]+ 18:            | 316 |
| 1.31E+08 | 1.09E+08 |                       | 36  |
| 121579.7 | 126212.3 |                       | 380 |
| 425851.6 | 657929.4 | [M+H+HCC              | 217 |
| 1257214  | 191769.1 | [1188][M+2]+          | 25  |
| 14743135 | 7286757  |                       | 118 |
| 141268.6 | 88418.72 |                       | 390 |
| 239525.9 | 171904.6 |                       | 343 |
| 19955999 | 27501427 | [751][M]+ [2M+K]+ 2(  | 215 |
| 41270.74 | 0        |                       | 107 |
| 1077290  | 1384576  |                       | 144 |
| 1.49E+08 | 1.63E+08 | [492][M]+ [M+K]+ 33:  | 31  |
| 530363.3 | 59070.86 | [1188][M+1]+          | 25  |
| 957408.7 | 127755.6 | [1355][M+2]+          | 25  |
| 101718.7 | 99892.44 |                       | 186 |
| 332742.9 | 200463.2 | [M+K+NH3              | 319 |
| 112282.7 | 111912.4 | [M+Na+HC              | 95  |
| 54841871 | 64999179 | [838][M]+ [M+Na]+ 4:  | 27  |
| 1531209  | 1516404  | [M+H+NH3              | 196 |
| 7216829  | 5802741  |                       | 310 |
| 3405881  | 3926588  | [1054][M]+            | 144 |
| 946502.3 | 1730406  |                       | 221 |
| 196122.1 | 266841.8 |                       | 193 |
| 279835.1 | 77803.1  | [1580][M+1]+          | 100 |
| 119660.6 | 118614.4 |                       | 375 |
| 2647188  | 1496172  | [M+H-CH2]             | 316 |
| 4321490  | 5819200  | [2M+2Na+:             | 127 |
| 2411937  | 435479   | [1188][M]+ [M+H-HCO   | 25  |
| 37824.84 | 289190.4 | [M+Na]+ 3:            | 55  |
| 1936451  | 603148.5 |                       | 128 |
| 935566.9 | 1647648  | [1169][M]+ [M+Na]+ 5: | 342 |
| 1242046  | 3722973  | [M+Na]+ 1:            | 316 |
| 10004198 | 9777281  |                       | 352 |
| 2487362  | 2034338  |                       | 257 |
| 6378164  | 2776333  | [1424][M]+ [M+Na]+ 7: | 100 |
| 1109744  | 2491114  | [3M+2Na+I             | 192 |
| 19600229 | 25242910 | [492][M+2]+           | 31  |
| 5658.54  | 12317.9  |                       | 259 |
| 83027.62 | 335556.7 |                       | 213 |
| 6879802  | 7986084  |                       | 299 |

|          |          |                         |     |
|----------|----------|-------------------------|-----|
| 704927.3 | 960130.3 |                         | 159 |
| 33414272 | 35348923 | [492][M+1]+             | 31  |
| 16788500 | 19840102 | [838][M+1]+             | 27  |
| 1834004  | 1922744  | [M+2K-H]+               | 120 |
| 20790524 | 9321433  | [1046][M+1]+            | 40  |
| 720273.8 | 114158.5 | [1188][M+4]+            | 25  |
| 17782820 | 15919142 | [523][M]+               | 304 |
| 481817.9 | 424008.9 |                         | 73  |
| 1317718  | 898179.4 | [M+H-H2O]               | 100 |
| 739870.9 | 774980.7 | [1054][M+1]+            | 144 |
| 6562410  | 8077480  | [M+H]+ 65!              | 90  |
| 412789.9 | 504511.6 | [M+Na+CF <sub>3</sub> ] | 245 |
| 3074993  | 3291571  | [M+H-H2O]               | 51  |
| 42058450 | 52143413 |                         | 108 |
| 1013650  | 888050.5 |                         | 173 |
| 4265183  | 3237271  | [599][M]+               | 100 |
| 3003488  | 4209768  | [M+2Na-H]               | 281 |
| 7127839  | 8230084  | [M+H+CF <sub>3</sub> ]  | 229 |
| 4255821  | 4817437  |                         | 318 |
| 1770943  | 2690929  | [M+H]+ 49!              | 217 |
| 122668.7 | 140994   |                         | 276 |
| 24045941 | 11102508 | [1380][M+1]+            | 183 |
| 8809147  | 10193088 | [M+Na]+ 3!              | 116 |
| 608496.9 | 801552.5 | [407][M+1]2+            | 26  |
| 2274719  | 2269272  |                         | 25  |
| 712996.5 | 678258   | [41][M]+                | 221 |
| 1196923  | 1572375  | [401][M+1]+             | 144 |
| 23290598 | 22213873 | [1252][M]+ [M+K]+ 60!   | 104 |
| 319113.4 | 692759.9 | [234][M+2]+             | 49  |
| 78249725 | 77452554 | [233][M]+               | 31  |
| 3534034  | 4909778  | [751][M+1]+             | 215 |
| 6628864  | 9037739  | [492][M+4]+             | 31  |
| 447569.2 | 417961.2 |                         | 31  |
| 2840145  | 3434882  |                         | 225 |
| 159505.9 | 241710.3 |                         | 132 |
| 3300906  | 3973441  |                         | 279 |
| 2015990  | 1472775  | [1246][M+2]+            | 31  |
| 225226.6 | 197612.1 | [1477][M+3]+            | 286 |
| 23984817 | 19368691 | [942][M]+               | 215 |
| 9280262  | 12649755 |                         | 15  |
| 485273.5 | 159182.6 | [1575][M]+              | 100 |
| 378834.5 | 318168.8 | [M+H-C2H <sub>4</sub> ] | 311 |
| 1828907  | 2498614  | [M+H-CO <sub>2</sub> ]  | 342 |
| 3034186  | 3436018  | [M+H-CO]+               | 31  |
| 895547.1 | 1146841  |                         | 33  |
| 3201184  | 1585455  | [1164][M+2]+            | 153 |
| 5862075  | 5642354  | [M+K]+ 31!              | 254 |

|          |          |                       |     |
|----------|----------|-----------------------|-----|
| 4.18E+08 | 4.45E+08 | [295][M]+             | 31  |
| 6506583  | 6441022  | [1252][M+1]+          | 104 |
| 151463.1 | 19487.58 |                       | 25  |
| 91273.34 | 37272.14 | [M+3H-C6H6]+          | 357 |
| 594608.5 | 554660.7 | [M+K]+ 684            | 282 |
| 2590019  | 3839441  | [M+H+NH3]+            | 316 |
| 4510351  | 3843683  | [M+Na]+ 684           | 95  |
| 177851   | 19353.95 |                       | 107 |
| 55456102 | 46225587 | [294][M]+ [M+Na]+ 284 | 140 |
| 186319.1 | 94542.47 |                       | 87  |
| 699672.3 | 1001528  | [M+K+HCO3]+           | 237 |
| 1475853  | 2371659  | [M+K]+ 454            | 144 |
| 70277.47 | 32024.02 | [M+K+NaCl]+           | 138 |
| 3976342  | 3046290  |                       | 318 |
| 1278582  | 1137366  | [M+H-H2O]+            | 31  |
| 911215.7 | 4982099  |                       | 325 |
| 450740.5 | 134057.3 | [M+H]+ 534            | 40  |
| 15894664 | 15151079 | [233][M+1]+           | 31  |
| 66658.25 | 68449.96 | [1439][M+1]+          | 29  |
| 3174958  | 3649303  | [3M+H+K]+2            | 172 |
| 132874.1 | 130208.9 |                       | 100 |
| 1057297  | 407738.5 | [1549][M+3]+          | 100 |
| 263572.8 | 420660.4 |                       | 31  |
| 1459595  | 551497.6 | [M+Na]+ 184           | 316 |
| 7857543  | 9083345  | [M+K+NaCl]+           | 31  |
| 382638.5 | 382086.2 | [M+Na]+ 484           | 391 |
| 1738303  | 2119346  | [M+H]+ 204            | 283 |
| 18936305 | 19916850 | [585][M]+ [M+H]+ 394  | 237 |
| 374610.6 | 426692.2 |                       | 120 |
| 467076.4 | 347574.9 |                       | 215 |
| 760321   | 861557.1 | [62][M+1]+            | 199 |
| 92826494 | 98631275 | [295][M+1]+           | 31  |
| 752983.7 | 1247713  |                       | 221 |
| 359425.1 | 78396.67 | [1188][M+3]+          | 25  |
| 120477.7 | 139504.8 | [1076][M+1]+          | 137 |
| 3121114  | 3948895  | [M+H]+ 494            | 237 |
| 3986973  | 3889420  | [M+H]+ 314            | 144 |
| 3142348  | 4884528  | [M+2K-H]+             | 86  |
| 2338467  | 3654812  | [726][M]+ [M+Na]+ 484 | 96  |
| 1502086  | 1731252  | [M+Na+HC]+            | 221 |
| 2661372  | 3063128  | [691][M]+ [M+H]+ 424  | 221 |
| 2641520  | 3530745  | [M+H]+ 444            | 342 |
| 1326531  | 823597.7 | [1422][M]+ [M+H+NH3]+ | 310 |
| 20917.7  | 0        | [234][M+1]+           | 49  |
| 1937999  | 1988932  |                       | 172 |
| 6309735  | 5741860  | [M+H]+ 374            | 212 |
| 430729.6 | 742892.1 |                       | 215 |

|          |          |                       |     |
|----------|----------|-----------------------|-----|
| 157622.7 | 180164   |                       | 282 |
| 2237850  | 4516162  | [M+2K-H]+             | 311 |
| 11196245 | 3549362  | [483][M]+ [M+H]+ 36!  | 40  |
| 949675.1 | 1060274  |                       | 31  |
| 1876622  | 1904426  | [M+H]+ 28!            | 196 |
| 290917.4 | 1003777  |                       | 133 |
| 89141.89 | 67235.26 |                       | 205 |
| 151273.9 | 157535   | [M+K]+ 34!            | 230 |
| 321249.4 | 1044282  | [1247][M]+            | 159 |
| 12876261 | 15157768 | [M+K+NH3              | 262 |
| 583500.2 | 565454.4 |                       | 180 |
| 1883780  | 3038887  |                       | 352 |
| 6687271  | 7177240  | [55][M]+ [M+H]+ 22!   | 51  |
| 407426.5 | 1747521  | [3M+3K-H]             | 51  |
| 70212.26 | 0        | [M+Na+Na              | 29  |
| 786997.4 | 464935.9 |                       | 143 |
| 6890620  | 6481502  | [M+H-COCl             | 144 |
| 7052495  | 14891464 | [1174][M]+ [M+K]+ 55! | 215 |
| 446625.5 | 514701.7 |                       | 215 |
| 72082077 | 58355832 | [496][M]+ [M+Na]+ 3!  | 40  |
| 641318.2 | 591958.3 |                       | 16  |
| 3503749  | 3351799  |                       | 140 |
| 113863.6 | 254465.7 | [M+K+NH3              | 88  |
| 1.02E+08 | 75472630 | [M+Na]+ 2!            | 87  |
| 593300.2 | 1150408  | [644][M]+             | 86  |
| 1799692  | 2532662  | [751][M+2]+           | 215 |
| 774456.2 | 1438714  |                       | 413 |
| 7097657  | 8370706  | [M+Na]+ 6!            | 259 |
| 474154.6 | 713754.1 |                       | 76  |
| 801898.9 | 343415.4 | [1551][M]+            | 100 |
| 137639.1 | 180299.9 |                       | 14  |
| 3033245  | 3727636  | [M+Na+NH              | 221 |
| 98773.95 | 130853.4 |                       | 212 |
| 22340506 | 19868609 | [491][M]+ [M+2K-H]+   | 140 |
| 2239902  | 1748820  | [1348][M]+            | 31  |
| 386439.8 | 625168.4 | [M+H-CH4]             | 276 |
| 142284.3 | 54060.35 |                       | 217 |
| 93632.69 | 57729.81 | [M+H-CO]+             | 144 |
| 4679354  | 5978034  |                       | 293 |
| 13924665 | 6415181  | [3M+H+Na              | 4   |
| 1643814  | 2735562  | [1175][M]+            | 237 |
| 2362607  | 3556935  | [407][M]2+ [M+2K]2+ 6 | 26  |
| 15117395 | 12312780 | [M+H-C6H:             | 259 |
| 60369816 | 56354119 | [418][M]+ [M+H]+ 34!  | 144 |
| 128827.2 | 127130.7 | [1174][M+3]+          | 215 |
| 302656.3 | 299502.2 |                       | 75  |
| 740850.9 | 1373728  |                       | 215 |

|          |          |                       |     |
|----------|----------|-----------------------|-----|
| 3227124  | 3176995  | [523][M+1]+           | 304 |
| 83554.11 | 35661.2  | [M+Na]+ 5:            | 376 |
| 10442047 | 17722480 | [M+H]+ 52:            | 259 |
| 324167.7 | 868946   |                       | 274 |
| 591062.8 | 820855.9 |                       | 250 |
| 3511938  | 1196337  | [1579][M]+ [M+H-CO]+  | 100 |
| 329749.1 | 552409.2 |                       | 353 |
| 52871.2  | 91872.66 | [M+H]+ 43:            | 264 |
| 25429812 | 30572390 | [970][M]+ [M+K]+ 48:  | 31  |
| 36474.67 | 0        | [831][M+1]+           | 11  |
| 6503201  | 6995353  | [496][M+2]+           | 40  |
| 586748   | 312495   |                       | 353 |
| 1510838  | 2348873  | [M+K]+ 41:            | 237 |
| 3509904  | 4345988  |                       | 255 |
| 205791.3 | 259287.4 |                       | 212 |
| 106993.4 | 103570   | [2M+K]+ 2:            | 279 |
| 1724469  | 3521776  |                       | 158 |
| 64826.05 | 315884.1 | [M+K]+ 61:            | 112 |
| 11343785 | 18801733 | [M+H]+ 52:            | 239 |
| 3093010  | 4854014  |                       | 96  |
| 47523331 | 27800074 | [922][M]+ [M+K+NH3    | 188 |
| 1335610  | 2288604  |                       | 427 |
| 2022726  | 2352423  | [491][M+2]+           | 140 |
| 601960.1 | 872427.7 | [M+H-C5H8             | 76  |
| 746702.2 | 1075267  |                       | 353 |
| 1.19E+08 | 97384034 | [232][M]+ [M+H]+ 30:  | 14  |
| 913144.6 | 1295666  |                       | 268 |
| 3253930  | 3494320  | [1340][M]+            | 27  |
| 11205582 | 10968351 | [47][M]+ [M+H]+ 22:   | 277 |
| 5469730  | 8883021  | [M+H-NH3]             | 316 |
| 57605.63 | 290401.8 |                       | 36  |
| 721584.3 | 1383027  |                       | 440 |
| 14688818 | 12715997 | [M+H-C6H:             | 239 |
| 98991.6  | 101066.9 |                       | 95  |
| 2607178  | 4028440  |                       | 387 |
| 852471.7 | 1106080  |                       | 159 |
| 6.88E+08 | 9.01E+08 |                       | 8   |
| 23404131 | 25324512 |                       | 246 |
| 2312116  | 2665290  | [1086][M+1]+          | 31  |
| 1458501  | 2011383  |                       | 144 |
| 10943044 | 9942644  |                       | 240 |
| 43923345 | 39304458 | [1251][M]+ [M+Na]+ 6: | 26  |
| 407988.1 | 286464.8 | [1167][M+2]+          | 25  |
| 2812133  | 4134065  |                       | 207 |
| 617259.3 | 888558.9 |                       | 237 |
| 2859143  | 1027295  | [1462][M+1]+          | 100 |
| 19324091 | 25466160 | [M+Na+NH              | 159 |

|          |          |                      |     |
|----------|----------|----------------------|-----|
| 1475701  | 1987184  | [843][M+1]+          | 86  |
| 2.57E+08 | 3.12E+08 | [341][M]+ [M+H]+ 33: | 57  |
| 13496.28 | 39264.88 | [M+3Na-H]            | 95  |
| 887391.7 | 1162773  |                      | 215 |
| 399318.4 | 245567   |                      | 144 |
| 1088339  | 1692958  |                      | 169 |
| 39644.21 | 37458.82 | [M+K]+ 46:           | 391 |
| 362876.6 | 385992.9 | [M+H-H2O]            | 221 |
| 17316548 | 16121121 | [977][M]+ [M+K]+ 48: | 40  |
| 23934122 | 22102891 | [M+H]+ 30:           | 57  |
| 570627   | 975045.3 | [M+2Na-H]            | 342 |
| 188162.5 | 136039.2 |                      | 144 |
| 378434.2 | 780386.7 | [3M+2Na+H]           | 109 |
| 6748666  | 6045126  | [M+H-HCO]            | 237 |
| 15867609 | 18943065 |                      | 240 |
| 287344.6 | 218869.8 |                      | 16  |
| 709714.2 | 1113189  | [M+H-C2H4]           | 116 |
| 363506   | 505967   | [1175][M+1]+         | 237 |
| 18666193 | 12333282 | [1442][M+1]+         | 118 |
| 58009.92 | 100356.2 |                      | 104 |
| 9974407  | 8947916  | [405][M]+ [M+Na+HC]  | 245 |
| 245733.2 | 246553.9 |                      | 217 |
| 824664.9 | 1226098  | [M+H]+ 31:           | 90  |
| 48515238 | 31609898 | [1442][M]+           | 118 |
| 4330570  | 2866487  |                      | 207 |
| 225355.4 | 144549.8 | [M+H]+ 21:           | 104 |
| 913960.7 | 968355.2 |                      | 14  |
| 612375.5 | 788496.1 | [M+2H]2+             | 144 |
| 862453   | 1934073  |                      | 160 |
| 90981.36 | 57948.75 | [803][M+1]+          | 375 |
| 1510278  | 3194874  | [1174][M+1]+         | 215 |
| 4856401  | 6739581  | [1003][M]+           | 171 |
| 1082887  | 1231811  | [492][M+5]+          | 31  |
| 4.81E+08 | 7.74E+08 | [465][M]+ [M+H]+ 36: | 11  |
| 10355542 | 7113333  | [524][M]+ [M+H]+ 38: | 94  |
| 1276604  | 1957393  | [288][M]3+           | 31  |
| 2773802  | 2939570  |                      | 31  |
| 646260.8 | 919781.9 | [M+Na]+ 4:           | 96  |
| 112279.3 | 15264.9  | [M+K]+ 43:           | 31  |
| 6202291  | 5981674  | [M+K]+ 32:           | 207 |
| 19588545 | 18122315 | [428][M]+            | 25  |
| 24598291 | 19684470 | [232][M+1]+          | 14  |
| 7105726  | 8938406  |                      | 86  |
| 1983809  | 1784900  | [M+H]+ 17:           | 51  |
| 297924   | 1595410  | [M+H]+ 29:           | 88  |
| 214901.1 | 357813.4 | [99][M]+ [M+H-CH2]   | 55  |
| 4181977  | 1968162  | [1380][M+2]+         | 183 |

|          |          |              |            |     |
|----------|----------|--------------|------------|-----|
| 23360840 | 35901731 | [941][M]+    | [M+Na]+ 4: | 52  |
| 24956650 | 19564258 |              | [M+H-CO]+  | 118 |
| 778934.4 | 774773.6 |              |            | 251 |
| 76394.17 | 23680.43 |              | [2M+Na+K]  | 25  |
| 4362527  | 4107040  |              | [M+K+NaCl  | 100 |
| 471239.7 | 305483.6 | [1422][M+1]+ |            | 310 |
| 6636250  | 4224846  |              |            | 263 |
| 6005372  | 4528490  | [942][M+1]+  |            | 215 |
| 13297710 | 11844121 | [1251][M+1]+ |            | 26  |
| 8016956  | 6447039  |              | [M+2H]2+ : | 14  |
| 1244387  | 1991575  | [833][M]+    |            | 127 |
| 3616670  | 1878658  | [923][M]+    | [M+Na]+ 4: | 31  |
| 382409.1 | 1297298  |              | [M+Na]+ 3: | 101 |
| 86679917 | 61576811 | [302][M]+    |            | 118 |
| 3.52E+08 | 4.61E+08 |              | [M+H-CH2]  | 22  |
| 18730423 | 11265052 |              | [M+Na+NH   | 318 |
| 7059687  | 6250606  | [568][M]+    |            | 112 |
| 128801.1 | 167846.8 | [1439][M]+   |            | 29  |
| 2095799  | 1923506  |              | [3M+H+Na   | 342 |
| 1301825  | 2394184  |              |            | 304 |
| 92608.05 | 166710.1 |              | [2M+Na+K]  | 110 |
| 121042.6 | 206858.2 | [791][M]+    | [M+Na]+ 4: | 95  |
| 543975.2 | 545033.6 |              | [M+2H-CO]  | 31  |
| 556201.8 | 380149.2 |              |            | 168 |
| 1277748  | 664942.3 | [1577][M]+   | [2M+Na]+ : | 100 |
| 401048.7 | 98345.88 |              |            | 34  |
| 4322720  | 3926034  |              | [M+H-H2O]  | 144 |
| 1448041  | 924128.4 |              |            | 100 |
| 592520.2 | 630051.1 |              | [M+Na]+ 4: | 169 |
| 14252.54 | 0        |              | [3M+H+K]2  | 100 |
| 1.27E+09 | 1.09E+09 | [340][M]+    | [M+H]+ 33: | 14  |
| 1194544  | 981560.4 | [1122][M+1]+ |            | 153 |
| 522249.3 | 866572.7 |              | [M+2H-HC(  | 237 |
| 7027731  | 7317760  | [295][M+2]+  |            | 31  |
| 575111.4 | 651884   |              |            | 31  |
| 13755712 | 12500612 |              |            | 277 |
| 99859.54 | 79509.19 |              | [M+Na+NH   | 14  |
| 23857468 | 10411174 | [1019][M]+   | [M+Na]+ 5: | 100 |
| 5032218  | 6144426  |              |            | 14  |
| 891999.2 | 1468601  |              | [M+Na]+ 4: | 83  |
| 8021.534 | 46558.79 |              | [M+Na]+ 8( | 25  |
| 2401328  | 873954.6 | [1549][M+1]+ |            | 100 |
| 68037.64 | 33983.66 | [1422][M+2]+ |            | 310 |
| 4081700  | 3318815  |              |            | 378 |
| 3830379  | 3781583  |              |            | 342 |
| 4933282  | 7021619  | [970][M+1]+  |            | 31  |
| 3794913  | 3245199  |              | [M+Na]+ 2: | 193 |

|          |          |                      |     |
|----------|----------|----------------------|-----|
| 1231659  | 1517430  | [1003][M+1]+         | 171 |
| 3974059  | 2997307  | [M+H-H2O]            | 120 |
| 9281548  | 7048410  | [M+H]+ 63!           | 158 |
| 164027.1 | 61401.31 | [1189][M+1]+         | 29  |
| 70945.03 | 64832.8  |                      | 55  |
| 12153371 | 9419708  | [M+K+NH3             | 350 |
| 22981339 | 18412771 | [199][M]+ [M+Na]+ 2' | 144 |
| 20566.78 | 0        | [2M+2Na+!            | 17  |
| 293322.3 | 319930.7 | [751][M+3]+          | 215 |
| 1065477  | 2127062  | [M+H+NH3             | 117 |
| 2657512  | 1863421  |                      | 29  |
| 1018418  | 1436857  | [M+H]+ 20!           | 31  |
| 540508.6 | 313338.5 |                      | 176 |
| 564464.1 | 330025.4 |                      | 116 |
| 55499.87 | 13239.05 | [2M+Na+K]            | 169 |
| 690146.2 | 608997.8 | [1323][M+1]2+        | 219 |
| 2232057  | 1034359  | [2M+3H]3+            | 40  |
| 799760.9 | 512535.4 |                      | 24  |
| 2.99E+08 | 2.12E+08 | [301][M]+ [M+H]+ 32! | 40  |
| 17088808 | 21656321 |                      | 298 |
| 1336028  | 1114450  |                      | 14  |
| 4403699  | 1494770  | [1549][M]+ [M+H-CO2] | 100 |
| 47603.25 | 18614.37 |                      | 138 |
| 976414.5 | 1067044  | [M+Na]+ 4!           | 245 |
| 2414812  | 2142241  | [496][M+4]+          | 40  |
| 6201815  | 4735700  |                      | 245 |
| 65708822 | 46521605 | [301][M+1]+          | 40  |
| 454487.5 | 709635.2 |                      | 318 |
| 244243.4 | 516363.1 |                      | 250 |
| 2.97E+08 | 2.55E+08 | [340][M+1]+          | 14  |
| 4297015  | 7346658  | [2M+2Na+!            | 158 |
| 16007011 | 11917984 | [653][M]+ [M+H]+ 41! | 40  |
| 1112025  | 320056.9 | [1589][M]+           | 100 |
| 535701.3 | 194513.2 | [599][M+1]+          | 100 |
| 1873188  | 1817665  | [933][M]3+           | 249 |
| 28353367 | 20486225 | [M+Na]+ 3!           | 220 |
| 2409381  | 1598183  | [2M+H]+ 2!           | 31  |
| 3806047  | 4392025  | [M+2Na+K-            | 14  |
| 860831.5 | 887057.3 | [568][M+1]+          | 112 |
| 528384.1 | 517318   | [942][M+2]+          | 215 |
| 1254459  | 1461025  | [989][M]3+           | 197 |
| 4641612  | 3568481  |                      | 245 |
| 203324.8 | 15124.25 |                      | 64  |
| 3943263  | 4560488  |                      | 14  |
| 1073384  | 985413.4 | [455][M]+ [M+H-HCO   | 100 |
| 20626163 | 17737437 |                      | 257 |
| 5924020  | 3089835  | [M+K]+ 49!           | 40  |



|          |          |                      |     |
|----------|----------|----------------------|-----|
| 4524429  | 8109091  | [908][M]+ [M+K]+ 45  | 207 |
| 584995.2 | 634169.8 | [288][M+1]3+         | 31  |
| 6072571  | 7561310  | [3M+2K]2+            | 284 |
| 353312.8 | 576685.7 |                      | 86  |
| 322733.3 | 296904.9 |                      | 144 |
| 213305.2 | 416881.2 | [M+2K-H]+            | 119 |
| 147104.8 | 270852.6 |                      | 217 |
| 1764271  | 923659.3 |                      | 367 |
| 640321.5 | 535473.6 | [1334][M]+ [M+K]+ 65 | 205 |
| 11062011 | 9270237  | [294][M+1]+          | 140 |
| 371879.1 | 181006.5 |                      | 203 |
| 3033192  | 3807221  |                      | 88  |
| 136484.2 | 171953.2 | [187][M+2]+          | 55  |
| 58122186 | 53482749 | [235][M]+ [M+H-H2O]  | 40  |
| 3654360  | 4520375  |                      | 223 |
| 2.32E+08 | 3.16E+08 | [M+2H-C5H            | 4   |
| 171423.9 | 224424.7 | [M+Na]+ 2            | 49  |
| 573293.7 | 187020.2 |                      | 40  |
| 56594736 | 55315211 |                      | 157 |
| 11107802 | 25427349 |                      | 160 |
| 66123.05 | 192798.8 |                      | 281 |
| 1044279  | 1887039  | [M+H]+ 23            | 31  |
| 500573.6 | 570464.8 | [M+K+HCO             | 31  |
| 105035.6 | 96822.79 |                      | 104 |
| 16989542 | 13455383 | [640][M]+            | 215 |
| 360922.2 | 385043.2 |                      | 144 |
| 1004483  | 1020308  | [47][M+1]+           | 277 |
| 998695.3 | 1317272  | [M+H-CO]+            | 90  |
| 661514.6 | 338143.4 | [M+K]+ 60            | 191 |
| 13190376 | 12357788 | [418][M+1]+          | 144 |
| 419261.6 | 575927.5 | [M+K]+ 37            | 215 |
| 1509249  | 770376.2 | [977][M+2]+          | 40  |
| 13272295 | 8811091  | [1093][M]+ [M+H]+ 56 | 40  |
| 668947.3 | 1109393  | [M+2H]2+             | 40  |
| 94298399 | 62166854 | [M+K]+ 26            | 24  |
| 30806.89 | 35263.13 |                      | 116 |
| 1093782  | 4913166  | [1307][M+1]+         | 112 |
| 1285818  | 981431.4 | [1246][M+1]+         | 31  |
| 5973756  | 7866833  | [843][M]+            | 86  |
| 166400   | 216231.6 | [M+K]+ 29            | 14  |
| 2009242  | 1873902  |                      | 14  |
| 3986082  | 2873013  |                      | 14  |
| 878731   | 728354.7 | [3][M+1]+            | 112 |
| 186791.6 | 249833   |                      | 244 |
| 9024102  | 7702787  |                      | 26  |
| 390633.7 | 139840   | [1589][M+3]+         | 100 |
| 844741.8 | 767520.5 | [2M+K]+ 2            | 289 |

|          |          |                      |     |
|----------|----------|----------------------|-----|
| 794296.2 | 559079.7 | [M+H-CH2]            | 40  |
| 30691.43 | 10687.38 |                      | 47  |
| 3982663  | 4061665  | [M+H-CO]+            | 60  |
| 218031.5 | 247851.6 | [1087][M+1]+         | 40  |
| 1220143  | 1675911  |                      | 31  |
| 14191708 | 8710927  | [564][M]+            | 217 |
| 366730.2 | 145735.6 | [M+Na]+ 40           | 79  |
| 219761.7 | 249539.4 |                      | 31  |
| 458985.1 | 464725.9 | [M+H]+ 44            | 342 |
| 261568.3 | 282234   | [187][M]+            | 55  |
| 1050213  | 1220664  | [3M+2K]2+            | 276 |
| 205295.5 | 357777.4 | [M+2K]2+ 2           | 144 |
| 17115138 | 13260510 | [3][M]+ [M+H-H2O]    | 112 |
| 222501.4 | 227562.1 | [99][M+2]+           | 55  |
| 1992419  | 1716071  |                      | 14  |
| 147245.3 | 281229.5 | [M+H-CO]+            | 86  |
| 36633395 | 12532145 | [784][M]+ [M+H+NH3]  | 188 |
| 4929616  | 12076444 | [983][M]+            | 11  |
| 3780090  | 3632717  | [585][M+1]+          | 237 |
| 12136677 | 10100737 | [22][M]+ [M+H]+ 20   | 215 |
| 636992.5 | 1065417  | [897][M+1]2+         | 23  |
| 4898554  | 3804299  |                      | 160 |
| 10184386 | 8174714  | [M+H+HCC]            | 193 |
| 14978.49 | 8314.202 | [1146][M+3]+         | 29  |
| 5268629  | 5130592  | [1255][M]+ [M+Na]+ 6 | 255 |
| 1662601  | 2150895  |                      | 155 |
| 75039297 | 61723727 | [349][M]+ [M+H]+ 33  | 121 |
| 542995.9 | 1683805  |                      | 304 |
| 8269.092 | 20455.97 | [M+K]+ 43            | 119 |
| 2251701  | 1732684  |                      | 171 |
| 15078899 | 14890187 | [3M+2K]2+            | 16  |
| 4699071  | 12545568 | [242][M]+            | 104 |
| 115276.4 | 2549587  |                      | 141 |
| 383515.4 | 173579.1 |                      | 246 |
| 3164295  | 2267698  | [M+3H-NH]            | 14  |
| 201968.2 | 415965   | [M+K]+ 29            | 321 |
| 371428.6 | 663583   |                      | 288 |
| 12154704 | 11623894 | [M+Na]+ 3            | 57  |
| 985324.3 | 397579.7 | [1577][M+1]+         | 100 |
| 278437.8 | 197262.5 | [M+H]+ 69            | 144 |
| 11123982 | 10054764 |                      | 309 |
| 61028770 | 70731618 | [341][M+1]+          | 57  |
| 4051204  | 1568025  | [643][M+1]+          | 188 |
| 764699.9 | 2084345  | [3M+2K]2+            | 86  |
| 1.58E+08 | 1.2E+08  | [350][M]+ [M+K]+ 29  | 72  |
| 24373.76 | 48218.94 |                      | 238 |
| 19384012 | 6246709  | [643][M]+ [M+H]+ 41  | 188 |

|          |          |                      |     |
|----------|----------|----------------------|-----|
| 1352025  | 1688073  | [589][M+2]+          | 4   |
| 6446288  | 5956122  | [M+H-H20]            | 193 |
| 205576.4 | 222391   |                      | 16  |
| 4149303  | 3160354  | [2M+3H]3+            | 116 |
| 706680.9 | 683974.3 |                      | 14  |
| 169732.8 | 128240.1 |                      | 464 |
| 3722998  | 3131761  | [428][M+1]+          | 25  |
| 5595123  | 3987076  | [M+Na]+ 30           | 134 |
| 2269491  | 2978827  | [97][M]+             | 47  |
| 9708007  | 7957884  | [M+H-H20]            | 177 |
| 7435397  | 7487817  |                      | 162 |
| 3179206  | 6028713  | [M+H+HCC             | 78  |
| 2792042  | 1769473  |                      | 24  |
| 3036703  | 3335879  | [1537][M]+           | 66  |
| 14129442 | 8762612  |                      | 16  |
| 4390890  | 2572952  | [M+H]+ 37            | 40  |
| 2044859  | 951920.9 | [1515][M]+ [M+K]+ 84 | 34  |
| 317228   | 121597.9 |                      | 34  |
| 1964446  | 1657643  |                      | 281 |
| 191945   | 177350   | [1061][M+1]+         | 100 |
| 2573773  | 883465.8 | [1579][M+1]+         | 100 |
| 3037926  | 2789897  |                      | 408 |
| 2887804  | 1914885  |                      | 118 |
| 14577445 | 12538955 | [376][M]+            | 31  |
| 105241.7 | 26898.94 | [M+K]+ 43            | 95  |
| 2660062  | 3063378  | [705][M+1]+          | 14  |
| 975880.8 | 966968.1 |                      | 342 |
| 747487.1 | 484605.3 |                      | 260 |
| 1357788  | 1422016  | [M+Na]+ 2            | 192 |
| 841461.5 | 989738.9 |                      | 14  |
| 1566589  | 1287788  | [M+Na+K]2            | 18  |
| 166377.8 | 49428.13 | [M+Na+NH             | 339 |
| 266778.8 | 424947.6 | [455][M+2]+          | 100 |
| 2607364  | 1935072  | [599][M+2]+          | 100 |
| 1529190  | 1144808  |                      | 281 |
| 342952.5 | 130513.8 |                      | 466 |
| 11506108 | 12105971 |                      | 325 |
| 16363144 | 10592385 | [M+Na]+ 2            | 252 |
| 2173132  | 1771659  |                      | 118 |
| 220495.6 | 215376.2 | [M+2K]2+ 5           | 151 |
| 891008.9 | 1788492  |                      | 192 |
| 41394892 | 39932897 | [247][M]+ [M+H]+ 30  | 193 |
| 114921.6 | 26588.08 | [1370][M+2]+         | 25  |
| 41182.36 | 63509.38 |                      | 110 |
| 3051808  | 2046725  | [1477][M+2]+         | 286 |
| 236673.2 | 336735.2 | [788][M+1]+          | 202 |
| 10434166 | 7005973  |                      | 339 |

|          |          |                      |     |
|----------|----------|----------------------|-----|
| 1093255  | 901946   |                      | 31  |
| 3203082  | 3139342  | [491][M+1]+          | 140 |
| 642758.5 | 783343.6 | [M+H]+ 40:           | 144 |
| 31639250 | 27820077 | [340][M+2]+          | 14  |
| 156578.7 | 64963.62 |                      | 153 |
| 83590.94 | 107172.1 |                      | 444 |
| 1533300  | 616611.7 | [M+H+NH3             | 31  |
| 63405538 | 55143591 | [442][M]+ [M+Na]+ 3: | 14  |
| 2493650  | 1875373  | [M+H-CO]+            | 215 |
| 41357233 | 29540887 |                      | 14  |
| 3691283  | 3044517  |                      | 403 |
| 2311197  | 1910957  | [744][M+1]2+         | 270 |
| 2252809  | 9788050  |                      | 399 |
| 3543269  | 2659550  | [977][M+1]+          | 40  |
| 3294253  | 2715903  | [360][M]+ [M+Na]+ 3: | 86  |
| 12867332 | 11790664 |                      | 357 |
| 1128005  | 883100.6 | [M+Na]+ 1:           | 31  |
| 591888.8 | 711995.2 | [M+Na]+ 1:           | 14  |
| 5601347  | 8971863  | [941][M+1]+          | 52  |
| 36925.67 | 25226.51 |                      | 31  |
| 9821.175 | 28409.47 | [M+Na+K+1            | 49  |
| 228412.9 | 227504.4 | [M+Na+Na             | 217 |
| 98097.99 | 103587.1 |                      | 237 |
| 1079251  | 895006.2 | [172][M+1]+          | 14  |
| 180888   | 79980.97 |                      | 34  |
| 35056725 | 27042076 | [419][M]+ [M+H]+ 34: | 75  |
| 843127.7 | 501567.7 | [1294][M+1]2+        | 202 |
| 50437.85 | 18923.2  |                      | 107 |
| 2943248  | 2007654  | [653][M+1]+          | 40  |
| 4255706  | 3192842  |                      | 121 |
| 1854641  | 744096.2 | [M+K+NaCl            | 31  |
| 1757431  | 1818331  |                      | 282 |
| 24372.38 | 8656.292 | [M+K+NaCl            | 25  |
| 434625.3 | 548000.9 | [1348][M+1]+         | 31  |
| 35395020 | 26578943 | [350][M+1]+          | 72  |
| 817334.3 | 969595.2 |                      | 14  |
| 2928092  | 2009564  |                      | 95  |
| 124835.2 | 112661.8 |                      | 55  |
| 1752037  | 1210138  | [1255][M+1]+         | 255 |
| 976733.9 | 975383   |                      | 40  |
| 1156325  | 1624030  |                      | 31  |
| 11098559 | 9260344  | [156][M+1]+          | 155 |
| 1768523  | 1772030  | [M+K]+ 27:           | 223 |
| 901097.1 | 1587026  | [908][M+1]+          | 207 |
| 132268.7 | 298430.8 | [1169][M+1]+         | 342 |
| 189115.5 | 282058.3 | [97][M+1]+           | 47  |
| 4171819  | 2556492  | [1442][M+2]+         | 118 |

|          |          |                      |     |
|----------|----------|----------------------|-----|
| 8633487  | 3104386  | [732][M]+ [M+H]+ 44  | 188 |
| 151849.5 | 49778.43 | [1370][M+1]+         | 25  |
| 286341.8 | 3822906  |                      | 49  |
| 7.51E+08 | 5.93E+08 | [348][M]+ [M+H]+ 33  | 24  |
| 6672835  | 1983124  | [1462][M]+ [M+H]+ 78 | 100 |
| 3342052  | 2530889  |                      | 217 |
| 3917247  | 3941144  | [1246][M]+ [M+K+HCO  | 31  |
| 2434887  | 1930461  | [376][M+1]+          | 31  |
| 268480.3 | 375142.6 | [M+H]+ 38            | 14  |
| 11367.97 | 21576.66 | [1439][M+2]+         | 29  |
| 5520068  | 16282664 | [124][M]+            | 104 |
| 916930.6 | 1095197  | [705][M+3]+          | 14  |
| 72144.53 | 22892.27 |                      | 312 |
| 78335113 | 64588928 | [198][M]+ [M+H]+ 29  | 112 |
| 3926684  | 3127744  | [1543][M+2]+         | 257 |
| 63081.92 | 60305.31 | [M+Na]+ 3            | 55  |
| 1.75E+08 | 1.38E+08 | [348][M+1]+          | 24  |
| 329643.1 | 361460.2 | [M+H]+ 54            | 31  |
| 2781522  | 1182189  | [1424][M+1]+         | 100 |
| 31286.49 | 13292.79 | [M+Na]+ 5            | 25  |
| 6690524  | 6025611  |                      | 127 |
| 2476490  | 484431.4 |                      | 13  |
| 5505928  | 4613433  | [744][M]2+           | 270 |
| 29531512 | 21331473 | [473][M]+ [M+H-C2H   | 119 |
| 190359   | 164217.2 |                      | 342 |
| 5384183  | 5346890  |                      | 360 |
| 1921549  | 1769040  | [1456][M]2+          | 206 |
| 63932.46 | 19287.43 | [M+2K-H]+            | 232 |
| 195385   | 197239.3 |                      | 116 |
| 1650024  | 1499077  | [M+Na+HC             | 16  |
| 934161.8 | 789075   |                      | 40  |
| 416141.1 | 231133.4 |                      | 474 |
| 29294375 | 20662866 | [1477][M]+           | 286 |
| 221246.3 | 234526.6 | [833][M+1]+          | 127 |
| 932788.7 | 336508.8 | [1538][M+1]+         | 100 |
| 2117996  | 2091845  | [1335][M+1]+         | 31  |
| 607062.2 | 966524.4 | [M+H-CO2]            | 212 |
| 1022498  | 1044049  | [M+2Na-H]            | 316 |
| 9636.273 | 0        |                      | 108 |
| 208165.4 | 148368.4 | [M+Na+HC             | 17  |
| 18125379 | 10867140 |                      | 72  |
| 454646.1 | 562837   | [873][M]+            | 360 |
| 167635.4 | 247872   | [M+Na+NH             | 218 |
| 9476713  | 5913677  | [10][M]+ [M+Na]+ 1   | 24  |
| 177066.6 | 208161.1 | [M+2H-C4             | 14  |
| 1624749  | 1322369  | [M+K+CF3             | 193 |
| 13223129 | 10752040 | [442][M+1]+          | 14  |

|          |          |                     |     |
|----------|----------|---------------------|-----|
| 8376296  | 3543873  | [784][M+1]+         | 188 |
| 567469.3 | 289107.8 | [923][M+1]+         | 31  |
| 436608.2 | 707053.8 | [M+H+K]2+           | 14  |
| 157552.8 | 145912.5 |                     | 342 |
| 3556943  | 3275817  |                     | 87  |
| 274720.6 | 131314.4 | [M+K]+ 49           | 25  |
| 1339723  | 7548935  | [M+Na+HC            | 49  |
| 3928224  | 2449364  |                     | 40  |
| 918255.8 | 1039456  | [1340][M+1]+        | 27  |
| 467151.2 | 385425.3 | [1267][M]+ [2M+Na]+ | 100 |
| 11681963 | 6819393  | [M+H-H2O]           | 140 |
| 874178.8 | 2568910  | [M+2H]2+            | 80  |
| 225159.9 | 383253   |                     | 390 |
| 3100447  | 2661909  |                     | 383 |
| 113719.6 | 85195.16 | [M+K]+ 55           | 18  |
| 675693.3 | 588471.2 |                     | 24  |
| 3126780  | 1772576  | [1093][M+1]+        | 40  |
| 207319.4 | 553793.3 | [93][M+1]2+         | 159 |
| 3173116  | 2322514  |                     | 321 |
| 17640.36 | 92446.32 | [1167][M]+          | 25  |
| 2558027  | 1847251  |                     | 24  |
| 684268.5 | 344009.1 | [1189][M+2]+        | 29  |
| 141719   | 235209.5 |                     | 237 |
| 213936.7 | 163102.8 | [878][M+1]+         | 33  |
| 3475565  | 15654207 | [1307][M]+ [M+K+NH3 | 112 |
| 1118553  | 2715705  | [93][M]2+ [M+2H]2+  | 159 |
| 1341185  | 1033794  | [M+2K]2+ &          | 31  |
| 207696.2 | 94498.66 | [M+K]+ 31           | 146 |
| 1950714  | 2032688  | [M+K+NH3            | 250 |
| 2482642  | 1650452  | [1400][M]+          | 31  |
| 1191870  | 334607.7 |                     | 100 |
| 2597379  | 2273527  |                     | 24  |
| 496399.2 | 1898272  |                     | 165 |
| 122919.7 | 84960.64 | [M+Na]+ 4           | 375 |
| 1594520  | 2094868  | [946][M]+ [M+Na]+ 4 | 11  |
| 502857.2 | 276321   | [M+K+NaCl           | 60  |
| 3380243  | 6181520  | [M+H-COCl           | 171 |
| 286052.7 | 207355.3 | [M+K]+ 24           | 173 |
| 675273.8 | 457518.1 |                     | 381 |
| 2158080  | 1268452  |                     | 176 |
| 580056.6 | 518424.4 | [1456][M+1]2+       | 206 |
| 6258220  | 4348041  | [M+H+NH3            | 40  |
| 6927434  | 6159652  | [3M+2Na+I           | 104 |
| 4330104  | 3706543  |                     | 57  |
| 30074065 | 17472171 |                     | 76  |
| 342971.1 | 182145.2 |                     | 31  |
| 1270375  | 899331.3 | [3M+2H]2+           | 24  |

|          |          |                                                            |     |
|----------|----------|------------------------------------------------------------|-----|
| 254679.9 | 283963.7 | [M+H] <sup>+</sup> 56                                      | 215 |
| 871205.7 | 1014195  | [M+H-C3H] <sup>+</sup>                                     | 11  |
| 2724055  | 2373985  |                                                            | 24  |
| 16817954 | 13436785 | [349][M+1] <sup>+</sup>                                    | 121 |
| 1309147  | 211197.6 | [1189][M] <sup>+</sup> [M+H-CH <sub>2</sub> ] <sup>+</sup> | 29  |
| 4467223  | 6855880  | [M+H] <sup>+</sup> 89                                      | 357 |
| 2602173  | 11893608 | [163][M] <sup>+</sup>                                      | 51  |
| 459152.9 | 558633.7 | [1207][M+2] <sup>+</sup>                                   | 100 |
| 2598092  | 4110697  | [M+2K-H] <sup>+</sup>                                      | 318 |
| 33676341 | 28923087 | [2M+Na] <sup>+</sup>                                       | 31  |
| 363349.7 | 564292.1 |                                                            | 31  |
| 278346   | 80655.65 | [1380][M+3] <sup>+</sup>                                   | 183 |
| 2000611  | 1626673  | [690][M] <sup>+</sup> [M+H] <sup>+</sup> 42                | 391 |
| 390762.8 | 143388.4 |                                                            | 257 |
| 499974.2 | 1275717  | [M+K] <sup>+</sup> 22                                      | 27  |
| 1155204  | 877490.3 |                                                            | 424 |
| 7931869  | 1574082  |                                                            | 322 |
| 2838878  | 2877705  | [M+H-C5H] <sup>+</sup>                                     | 157 |
| 1019716  | 318666.5 | [946][M+2] <sup>+</sup>                                    | 11  |
| 953851.6 | 792818   | [1061][M] <sup>+</sup> [M+H-C2H] <sup>+</sup>              | 100 |
| 5963813  | 5442653  |                                                            | 16  |
| 716351.7 | 572951.3 |                                                            | 272 |
| 208861.2 | 368292.4 | [1174][M+4] <sup>+</sup>                                   | 215 |
| 622053.8 | 495880.7 | [M+K] <sup>+</sup> 54                                      | 14  |
| 174991.6 | 324979.7 |                                                            | 31  |
| 1154152  | 1005097  | [M+K] <sup>+</sup> 19                                      | 40  |
| 1510991  | 861898.6 | [M+K+HCO] <sup>+</sup>                                     | 24  |
| 183370.9 | 108538.2 | [348][M+3] <sup>+</sup>                                    | 24  |
| 393135.6 | 400026.4 |                                                            | 176 |
| 878991.1 | 971308.8 |                                                            | 4   |
| 3990968  | 2277074  | [M+Na] <sup>+</sup> 30                                     | 65  |
| 1277250  | 130903.3 | [859][M] <sup>+</sup>                                      | 140 |
| 2602508  | 858209.4 | [521][M+2] <sup>+</sup>                                    | 31  |
| 763230   | 844376.9 | [1590][M] <sup>+</sup> [2M+H] <sup>+</sup> 7               | 333 |
| 1340468  | 1065825  | [M+H-CH <sub>3</sub> ] <sup>+</sup>                        | 40  |
| 90059.38 | 288158.9 | [M+K] <sup>+</sup> 52                                      | 119 |
| 13680622 | 10954433 | [347][M] <sup>+</sup>                                      | 221 |
| 56189740 | 41330547 | [515][M] <sup>+</sup>                                      | 221 |
| 64859.06 | 188372.6 |                                                            | 87  |
| 19038.46 | 0        |                                                            | 138 |
| 7999821  | 6107754  | [M+H+NH <sub>3</sub> ] <sup>+</sup>                        | 86  |
| 4220404  | 3545042  | [M+H] <sup>+</sup> 77                                      | 206 |
| 67053.34 | 674922.3 | [M+H] <sup>+</sup> 30                                      | 209 |
| 8763715  | 2534125  | [869][M] <sup>+</sup> [M+K] <sup>+</sup> 44                | 188 |
| 671715   | 979388.6 | [M+2K-H] <sup>+</sup>                                      | 52  |
| 4556502  | 1717397  | [521][M] <sup>+</sup> [M+Na] <sup>+</sup> 3                | 31  |
| 2750679  | 2149996  | [640][M+1] <sup>+</sup>                                    | 215 |

|          |          |                       |     |
|----------|----------|-----------------------|-----|
| 1346765  | 1104472  | [1207][M]+ [M+Na]+ 5! | 100 |
| 1545475  | 1898983  |                       | 100 |
| 14322206 | 12204969 | [1335][M]+ [M+Na]+ 6! | 31  |
| 20003.37 | 6770.123 |                       | 60  |
| 103443.4 | 269195.1 | [3M+Na+2!             | 119 |
| 899652.6 | 594924.7 | [3M+2K]2+             | 112 |
| 395681.4 | 251385.2 | [970][M+3]+           | 31  |
| 217216.5 | 211592.4 | [M+Na]+ 4!            | 391 |
| 2782179  | 2318524  | [M+2H]2+              | 31  |
| 4149686  | 3523003  |                       | 401 |
| 1472182  | 1351389  | [849][M+1]3+          | 282 |
| 975440.8 | 529228.7 |                       | 24  |
| 536983.8 | 219401.8 |                       | 31  |
| 3907478  | 2326119  | [M+K+CF3!             | 116 |
| 563677.4 | 967284.6 |                       | 214 |
| 336261.6 | 412939   |                       | 116 |
| 13763805 | 11173847 | [198][M+1]+           | 112 |
| 541959   | 500187.6 | [1408][M+3]+          | 29  |
| 1829875  | 1649424  | [M+H-H20]             | 14  |
| 1346581  | 2315587  | [M+Na]+ 2!            | 192 |
| 86153.09 | 18469.75 | [1229][M+1]+          | 52  |
| 4751777  | 3710927  |                       | 407 |
| 387683.2 | 385885   |                       | 61  |
| 219206.1 | 136880.3 | [M+H]+ 53!            | 40  |
| 4700400  | 3589481  | [M+Na]+ 3!            | 276 |
| 234758.9 | 270891.2 | [2M+Na]+ :            | 119 |
| 80874.58 | 76105.79 |                       | 104 |
| 7878968  | 6008284  |                       | 76  |
| 1124171  | 1155517  | [323][M+1]+           | 11  |
| 2991657  | 16871919 |                       | 399 |
| 140822.7 | 80924.43 | [M+K]+ 74!            | 47  |
| 356462.2 | 450119.3 |                       | 120 |
| 953759.7 | 1782836  |                       | 14  |
| 19730282 | 13019979 | [236][M]+             | 24  |
| 749389.6 | 1322779  | [2M+Na+2!             | 100 |
| 7177612  | 5413558  |                       | 201 |
| 21261.72 | 63156.16 | [2M+Na+K]             | 100 |
| 7980470  | 4608259  | [M+H-H20]             | 134 |
| 3393604  | 2074216  |                       | 158 |
| 252123.8 | 446007.2 | [M+Na+HC              | 49  |
| 7434505  | 5865240  | [M+H]+ 18!            | 112 |
| 1543189  | 676627.3 | [964][M+1]+           | 25  |
| 101724.3 | 15417.55 | [1184][M+2]+          | 60  |
| 2043980  | 1557733  |                       | 210 |
| 337948.6 | 304497.3 |                       | 14  |
| 195438.1 | 1212756  |                       | 88  |
| 330098.3 | 488319.5 | [55][M+1]+            | 51  |



|          |          |                                               |     |
|----------|----------|-----------------------------------------------|-----|
| 112592.9 | 37811.04 | [M+H-CH <sub>2</sub> ]                        | 29  |
| 3615380  | 2253750  |                                               | 339 |
| 75852.45 | 132244.8 |                                               | 321 |
| 1419865  | 1299159  | [M+K]+ 55                                     | 31  |
| 489036.7 | 393066.6 | [707][M+1] <sup>2+</sup>                      | 25  |
| 187111   | 95796.29 | [M+K]+ 30                                     | 193 |
| 359999.4 | 434739.8 |                                               | 63  |
| 669971.2 | 672110   | [M+K+NaCl]                                    | 31  |
| 293719.2 | 241221.2 | [M+Na]+ 5                                     | 40  |
| 163565.2 | 140874.9 | [606][M+1] <sup>+</sup>                       | 286 |
| 85883.81 | 212461.9 |                                               | 116 |
| 979774.7 | 221958   | [M+Na]+ 6                                     | 31  |
| 261436.6 | 676046.6 | [M+H-CO] <sup>+</sup>                         | 27  |
| 12098467 | 7382778  | [M+2K-H] <sup>+</sup>                         | 220 |
| 1471312  | 1409822  | [M+2H] <sup>2+</sup>                          | 57  |
| 290972.8 | 677614.8 | [M+K+HCO]                                     | 304 |
| 757867.7 | 4466532  | [M+H-CO] <sup>+</sup>                         | 49  |
| 6096891  | 6153292  |                                               | 57  |
| 11260512 | 4579962  | [922][M+1] <sup>+</sup>                       | 188 |
| 17828.86 | 14039.82 | [1370][M+3] <sup>+</sup>                      | 25  |
| 2385503  | 6540093  | [883][M] <sup>+</sup> [M+H] <sup>+</sup> + 49 | 159 |
| 914856.5 | 697761.7 | [1400][M+2] <sup>+</sup>                      | 31  |
| 1233103  | 897099.9 |                                               | 24  |
| 1977094  | 330081.3 | [1355][M] <sup>+</sup>                        | 25  |
| 143455   | 166701.4 | [M+H-CH <sub>4</sub> ]                        | 49  |
| 1225595  | 1078766  |                                               | 327 |
| 32811157 | 27036514 | [M+Na]+ 3                                     | 24  |
| 13610601 | 12796293 | [M+K]+ 75                                     | 31  |
| 804911.8 | 1313726  |                                               | 57  |
| 8863.681 | 20314.05 | [1184][M+1] <sup>+</sup>                      | 60  |
| 800539.8 | 172248.6 | [M+H+HCC]                                     | 25  |
| 7072267  | 3072279  | [964][M] <sup>+</sup> [M+Na] <sup>+</sup> + 4 | 25  |
| 2497602  | 1336782  | [549][M] <sup>+</sup> [M+K+NaCl]              | 17  |
| 450824.7 | 547573.9 | [691][M+1] <sup>+</sup>                       | 221 |
| 8001789  | 7307483  | [247][M+1] <sup>+</sup>                       | 193 |
| 4899351  | 5119970  | [1284][M+1] <sup>+</sup>                      | 81  |
| 243941.2 | 393721.8 |                                               | 29  |
| 1061332  | 742791   |                                               | 87  |
| 143069.9 | 7048.907 | [1237][M+1] <sup>+</sup>                      | 29  |
| 36265188 | 31842451 |                                               | 222 |
| 53147.22 | 0        |                                               | 29  |
| 1704675  | 515872   | [1579][M+2] <sup>+</sup>                      | 100 |
| 831012.4 | 328856.3 | [1515][M+1] <sup>+</sup>                      | 34  |
| 816247.3 | 595679.4 | [3M+H+Na]                                     | 245 |
| 6806.215 | 97320.27 | [680][M+1] <sup>+</sup>                       | 51  |
| 3190140  | 6161745  |                                               | 221 |
| 3143808  | 4427260  | [492][M+3] <sup>+</sup>                       | 31  |

|          |          |                      |     |
|----------|----------|----------------------|-----|
| 1133508  | 1073655  | [1335][M+3]+         | 31  |
| 1084540  | 368864.2 | [M+Na+Na             | 94  |
| 632841.2 | 269884   | [1589][M+2]+         | 100 |
| 264869.1 | 105966   |                      | 40  |
| 1681212  | 760058.7 | [869][M+1]+          | 188 |
| 20447979 | 12347451 | [M+H]+ 33            | 171 |
| 595918.6 | 561000.3 | [M+H]+ 59            | 251 |
| 1648763  | 611509.5 | [1529][M]+           | 100 |
| 854576.7 | 1294987  |                      | 57  |
| 1585265  | 894371.6 |                      | 24  |
| 19002321 | 9001777  |                      | 30  |
| 4444824  | 3997951  | [1560][M+2]+         | 211 |
| 1912682  | 1905645  | [1586][M+1]+         | 251 |
| 6082096  | 5287910  | [1505][M]+ [M+H]+ 85 | 286 |
| 156654.2 | 120557.7 | [2M+Na+K]            | 172 |
| 9240712  | 10402615 | [1086][M]+ [M+H+HCC  | 31  |
| 240661.1 | 504530.4 | [M+Na]+ 2            | 52  |
| 7416110  | 3791542  | [M+K]+ 54            | 14  |
| 338913.9 | 216610.2 | [1549][M+5]+         | 100 |
| 1558769  | 931489.2 | [M+K+NaC             | 14  |
| 15937.8  | 0        | [M+K]+ 46            | 223 |
| 593839.6 | 650830.3 | [M+2K]2+ 6           | 31  |
| 1570645  | 1008821  |                      | 309 |
| 95352.45 | 241911.1 | [M+2H-NH             | 276 |
| 1238520  | 914049.4 |                      | 24  |
| 350527.7 | 461755.9 | [340][M+3]+          | 14  |
| 787495.2 | 688554.8 | [465][M+3]+          | 11  |
| 276826.9 | 478537.1 |                      | 31  |
| 362636.9 | 461545.5 | [540][M+1]2+         | 25  |
| 846689.8 | 491067.6 |                      | 14  |
| 137538.6 | 69440.93 |                      | 223 |
| 10571835 | 8666275  | [464][M+1]+          | 160 |
| 22470196 | 19945815 | [1565][M]+           | 201 |
| 1274719  | 1295766  | [M+H-CO2]            | 212 |
| 3403301  | 5440748  | [M+H-CH2]            | 60  |
| 119145.2 | 92350.26 |                      | 110 |
| 4229684  | 3440561  |                      | 147 |
| 2028175  | 2552767  | [M+H]+ 35            | 57  |
| 87900.57 | 138402.1 | [M+Na+NH             | 217 |
| 0        | 11145.21 | [1167][M+1]+         | 25  |
| 637170.5 | 344637   | [10][M+1]+           | 24  |
| 1669793  | 971825.1 |                      | 14  |
| 19238539 | 11222503 | [496][M+1]+          | 40  |
| 4210806  | 3094904  | [3M+2H]2+            | 158 |
| 7201724  | 6212285  | [3M+2H]2+            | 249 |
| 2251088  | 1601735  | [M+H]+ 32            | 343 |
| 113161.1 | 266708.5 | [M+Na+HC             | 49  |

|          |          |                      |     |
|----------|----------|----------------------|-----|
| 268112.3 | 127846.2 | [3M+2K]2+            | 104 |
| 4254169  | 2943216  |                      | 379 |
| 1408190  | 5822042  | [M+H-CO2]            | 173 |
| 25114.98 | 205619.6 |                      | 178 |
| 257851.3 | 73051.12 | [M+Na]+ 4'           | 289 |
| 246477.1 | 300476.3 | [M+2H-H2O]           | 40  |
| 1012174  | 8046515  |                      | 184 |
| 1394364  | 1469233  | [M+H+NH3]            | 31  |
| 81685708 | 19884720 |                      | 1   |
| 345247.3 | 183684.4 |                      | 283 |
| 456134.9 | 381085.5 |                      | 31  |
| 1308447  | 1600813  | [879][M]+ [M+H-CH4]  | 116 |
| 640023.3 | 918312.9 | [M+2H]2+ !           | 31  |
| 197815.3 | 184975   |                      | 443 |
| 5901645  | 3782061  |                      | 301 |
| 1359531  | 1134209  | [M+H-COCl]           | 47  |
| 5996966  | 5360317  | [M+K+NaCl]           | 31  |
| 72103.71 | 47992.54 |                      | 394 |
| 211102.4 | 81142.29 | [M+Na+NH3]           | 215 |
| 1825964  | 588680.5 | [M+H-CO]+            | 100 |
| 124622.3 | 14354.14 | [1237][M+3]+         | 29  |
| 16932461 | 12956523 | [348][M+2]+          | 24  |
| 38510.74 | 65082.23 | [99][M+3]+           | 55  |
| 510903.9 | 1350029  | [883][M+1]+          | 159 |
| 1151868  | 976834   |                      | 57  |
| 208622.9 | 281773.3 |                      | 15  |
| 36590.53 | 43908.6  |                      | 103 |
| 7342540  | 5016320  | [M+Na]+ 3:           | 318 |
| 1695032  | 1293281  | [2M+H+K]2            | 31  |
| 27799.1  | 11820.97 | [1167][M+4]+         | 25  |
| 432427.4 | 665382.8 | [726][M+1]+          | 96  |
| 29331.89 | 107042.3 | [M+Na]+ 7:           | 29  |
| 650385   | 755229   |                      | 116 |
| 709810.8 | 380740.1 | [M+H]+ 63:           | 31  |
| 19086.68 | 4454.486 |                      | 287 |
| 16093.8  | 79637.04 | [M+K]+ 18:           | 55  |
| 2986277  | 2372626  | [M+K]+ 21:           | 281 |
| 3880538  | 3761440  | [M+H]+ 65:           | 31  |
| 1051175  | 1106890  | [496][M+3]+          | 40  |
| 597660   | 163381.7 | [M+H]+ 12:           | 100 |
| 8173603  | 9254193  | [209][M]+ [M+Na]+ 2' | 120 |
| 7005553  | 3676167  |                      | 17  |
| 134936.4 | 535110.8 |                      | 147 |
| 510058.7 | 1413604  | [M+H]+ 57'           | 86  |
| 1476268  | 715427.5 | [M+Na]+ 5:           | 14  |
| 210970.9 | 394938.1 | [M+K]+ 16:           | 15  |
| 731315.3 | 1261481  |                      | 159 |

|          |          |                                               |     |
|----------|----------|-----------------------------------------------|-----|
| 79630.87 | 292326.9 | [M+H] <sup>+</sup> 11                         | 322 |
| 1148146  | 2890639  |                                               | 183 |
| 172381.7 | 117301   | [1476][M] <sup>+</sup>                        | 100 |
| 1715512  | 1188749  | [692][M] <sup>+</sup>                         | 313 |
| 1394945  | 933509.3 | [M+K] <sup>+</sup> 52                         | 176 |
| 59952668 | 11367084 |                                               | 179 |
| 667567.5 | 1107338  | [1174][M+2] <sup>+</sup>                      | 215 |
| 119633.4 | 231864.1 | [M+K+Na] <sup>+</sup>                         | 119 |
| 6574418  | 4354823  | [359][M] <sup>+</sup> [M+H] <sup>+</sup> 33   | 217 |
| 7847784  | 5226510  | [705][M] <sup>+</sup> [M+Na] <sup>+</sup> 4   | 14  |
| 372289.1 | 282594.1 |                                               | 104 |
| 257952.2 | 322459.4 | [M+H-CO <sub>2</sub> ]                        | 342 |
| 545530.1 | 272348.7 |                                               | 31  |
| 5708323  | 3326006  |                                               | 85  |
| 2343806  | 921499.6 | [M+Na+K] <sup>+</sup>                         | 40  |
| 6585060  | 40061616 | [M+K] <sup>+</sup> 14                         | 316 |
| 7230.545 | 0        | [M+Na+HC]                                     | 47  |
| 1087674  | 756775.9 | [M+H] <sup>+</sup> 35                         | 86  |
| 1927568  | 481324.5 | [732][M+1] <sup>+</sup>                       | 188 |
| 953245.1 | 1062440  | [1405][M] <sup>+</sup> [M+K+CF <sub>3</sub> ] | 100 |
| 104086.5 | 37927.63 | [1242][M+1] <sup>+</sup>                      | 47  |
| 135110.2 | 284669.3 | [1207][M+3] <sup>+</sup>                      | 100 |
| 166156.8 | 53759.9  | [99][M+4] <sup>+</sup>                        | 55  |
| 14337982 | 12221800 | [1553][M+1] <sup>+</sup>                      | 260 |
| 1088564  | 222338.1 | [1589][M+1] <sup>+</sup>                      | 100 |
| 539831.5 | 325573.3 |                                               | 216 |
| 221544.4 | 184733   |                                               | 230 |
| 67883.14 | 65526.88 | [M+Na] <sup>+</sup> 7                         | 310 |
| 1499885  | 1275339  |                                               | 24  |
| 2615616  | 1967377  |                                               | 40  |
| 1320005  | 873170.5 | [1087][M] <sup>+</sup>                        | 40  |
| 5680201  | 4399538  | [M+Na] <sup>+</sup> 3                         | 144 |
| 16657236 | 8701435  | [M+H] <sup>+</sup> 31                         | 153 |
| 376202.3 | 1314996  | [124][M+1] <sup>+</sup>                       | 104 |
| 100658.8 | 32287.85 | [1404][M+1] <sup>+</sup>                      | 18  |
| 40185.45 | 233944.5 |                                               | 214 |
| 1368705  | 1211012  | [M+H+HCC]                                     | 31  |
| 1319571  | 2047301  | [M+H-C <sub>4</sub> H <sub>8</sub> ]          | 17  |
| 20579524 | 10713952 |                                               | 66  |
| 4639796  | 4097857  | [180][M] <sup>+</sup>                         | 61  |
| 549372.3 | 283193.5 | [M+K+HCO]                                     | 100 |
| 612567.1 | 3072171  | [M+Na] <sup>+</sup> 4                         | 49  |
| 4201892  | 3018632  | [301][M+2] <sup>+</sup>                       | 40  |
| 1784868  | 1328596  | [524][M+1] <sup>+</sup>                       | 94  |
| 754264.8 | 651753.6 | [1109][M] <sup>3+</sup>                       | 456 |
| 970422.3 | 1753885  | [M+H] <sup>+</sup> 44                         | 22  |
| 917416.8 | 718717.8 |                                               | 445 |

|          |          |                       |     |
|----------|----------|-----------------------|-----|
| 1214822  | 1196682  | [247][M+2]+           | 193 |
| 1669587  | 1263689  |                       | 24  |
| 365420.8 | 1521612  |                       | 173 |
| 3883916  | 3700787  | [1019][M+2]+          | 100 |
| 755126.7 | 3784899  |                       | 404 |
| 144639.8 | 704287.4 | [M+Na]+ 4!            | 49  |
| 2170663  | 1207416  |                       | 337 |
| 561978.1 | 678909.3 |                       | 175 |
| 6888489  | 5848462  |                       | 282 |
| 1826815  | 1066890  | [2M+Na+K]             | 100 |
| 37692663 | 29959348 |                       | 189 |
| 679441.7 | 563786.2 | [261][M+1]+           | 100 |
| 690131.8 | 322339.4 | [M+H-C2H4             | 40  |
| 3693484  | 3138469  | [M+H+NH3              | 24  |
| 324237.2 | 250460.8 | [M+Na]+ 2!            | 40  |
| 125696.1 | 1438497  | [M+H]+ 48!            | 104 |
| 124432.8 | 157542.8 |                       | 169 |
| 2913641  | 2651001  | [1586][M]+ [M+H]+ 13! | 251 |
| 2997002  | 1260863  | [M+H-H2O]             | 188 |
| 279537.5 | 492564.8 | [M+2K]2+ 3!           | 116 |
| 1583934  | 2118214  |                       | 178 |
| 4220837  | 2901144  | [M+Na]+ 2!            | 24  |
| 42360.52 | 0        |                       | 148 |
| 570070   | 278380.6 | [620][M+2]2+          | 29  |
| 557961.4 | 410672.5 |                       | 120 |
| 1997263  | 1016194  | [1093][M+2]+          | 40  |
| 1668247  | 1489516  |                       | 87  |
| 183529.8 | 336904.5 |                       | 71  |
| 285538.1 | 167269.8 |                       | 275 |
| 746397.1 | 739210.1 |                       | 132 |
| 1996591  | 1031342  | [M+K+CF3C             | 263 |
| 83349.28 | 8322.147 |                       | 388 |
| 115437.6 | 11916.46 | [M+2Na-H]             | 29  |
| 130171.9 | 261922.8 | [M+H-CO]+             | 255 |
| 3286867  | 3005535  |                       | 206 |
| 7336553  | 4156097  | [M+K]+ 33!            | 14  |
| 987579.7 | 1803550  | [M+H]+ 44!            | 55  |
| 13589.57 | 6757.858 |                       | 223 |
| 567887.8 | 453150   | [M+H-CO]+             | 14  |
| 1557336  | 537121.1 | [748][M]+             | 206 |
| 1163388  | 2621107  | [M+H+K]2+             | 31  |
| 847863.3 | 300497.3 |                       | 127 |
| 20663462 | 9818104  | [M+K+CF3C             | 24  |
| 6148373  | 4652509  |                       | 24  |
| 18464288 | 12474428 | [302][M+1]+           | 118 |
| 5332949  | 3354508  |                       | 415 |
| 16993251 | 11491414 |                       | 223 |

|          |          |                     |     |
|----------|----------|---------------------|-----|
| 2234918  | 955211.4 | [997][M]+ [M+H-H2O] | 31  |
| 1456175  | 8874331  | [364][M]+           | 196 |
| 5675544  | 6998968  |                     | 318 |
| 125986.8 | 807733.7 | [163][M+1]+         | 51  |
| 1707894  | 10476689 | [624][M]+           | 104 |
| 334268.5 | 146675.7 | [1551][M+1]+        | 100 |
| 136500.4 | 105328   | [3M+Na+2I           | 254 |
| 793532   | 1450256  | [745][M]+           | 116 |
| 281425.5 | 169075.5 |                     | 387 |
| 85838.66 | 1036520  | [M+H+HCC            | 49  |
| 5447266  | 3617139  |                     | 221 |
| 0        | 78693.73 | [M+Na]+ 5'          | 49  |
| 6041365  | 485631.6 | [530][M]+           | 104 |
| 176837.1 | 354708.2 |                     | 29  |
| 938115.7 | 725560.1 | [719][M+1]2+        | 270 |
| 299508   | 733993.4 |                     | 190 |
| 1133819  | 917160.4 | [508][M+1]+         | 134 |
| 241722.1 | 375423.6 | [2M+2K-H]           | 180 |
| 90818.91 | 69457.79 | [1410][M+2]+        | 278 |
| 385015.8 | 380247   |                     | 416 |
| 595407.9 | 593280   | [564][M+2]+         | 217 |
| 565043.7 | 406177.1 |                     | 14  |
| 867411   | 763173.8 | [M+H+Na]z           | 31  |
| 1457416  | 1572419  | [1485][M+1]2+       | 443 |
| 1044741  | 1297268  | [1588][M+1]+        | 282 |
| 820031.4 | 1024429  | [M+H-C4H8           | 289 |
| 651321.7 | 152605   | [1237][M]+          | 29  |
| 13881243 | 11976957 | [200][M]+           | 320 |
| 137521.9 | 342109.6 | [3M+Na+K]           | 55  |
| 1537729  | 1001849  |                     | 24  |
| 189622.4 | 85015.17 | [M+K]+ 438          | 144 |
| 1630333  | 2025130  | [820][M+1]+         | 2   |
| 378059.6 | 661713.5 |                     | 69  |
| 290874.8 | 1463201  |                     | 354 |
| 1083629  | 723912.6 | [22][M+1]+          | 215 |
| 75892.12 | 201982.9 | [M+H]+ 39:          | 212 |
| 6116168  | 4328149  |                     | 352 |
| 1109442  | 1069908  |                     | 23  |
| 1630595  | 2977040  |                     | 105 |
| 323685.1 | 54204.67 | [M+2Na-H]           | 16  |
| 399680.3 | 1044122  | [M+H]+ 36:          | 88  |
| 5082455  | 32384256 | [1395][M]+          | 275 |
| 1694493  | 5580553  | [875][M]+ [M+Na+CF: | 27  |
| 96881.33 | 0        | [1439][M+3]+        | 29  |
| 7153591  | 8509664  | [593][M+2]+         | 4   |
| 16400727 | 19712030 | [M+K]+ 486          | 17  |
| 3519660  | 2129676  | [M+K]+ 334          | 24  |

|          |          |                                                   |     |
|----------|----------|---------------------------------------------------|-----|
| 192804.4 | 139159   | [M+H-CH <sub>2</sub> ]                            | 24  |
| 143399.6 | 228343.6 | [M+2H-C <sub>4</sub> H <sub>8</sub> ]             | 31  |
| 687565   | 793137.3 | [361][M+1] <sup>2+</sup>                          | 29  |
| 2171095  | 2024440  | [693][M+2] <sup>3+</sup>                          | 92  |
| 122977.4 | 90105.85 | [506][M+1] <sup>2+</sup>                          | 198 |
| 1238190  | 634851.3 |                                                   | 31  |
| 34665.81 | 15396.53 | [M+K] <sup>+</sup> 31                             | 49  |
| 7343709  | 5320050  |                                                   | 14  |
| 1406052  | 3310543  | [M+2Na+K] <sup>+</sup>                            | 289 |
| 94117.27 | 66102.75 | [M+Na] <sup>+</sup> 4                             | 223 |
| 2160941  | 1677758  | [1582][M+2] <sup>+</sup>                          | 202 |
| 157216.2 | 145816   | [1271][M+1] <sup>2+</sup>                         | 219 |
| 9872608  | 5300202  | [M+Na] <sup>+</sup> 3                             | 40  |
| 508542.3 | 454208.2 |                                                   | 24  |
| 59649.12 | 0        | [1242][M+3] <sup>+</sup>                          | 47  |
| 121840.1 | 524738.2 | [1499][M+1] <sup>+</sup>                          | 137 |
| 328696   | 247037.2 |                                                   | 40  |
| 553081.6 | 915285.4 |                                                   | 289 |
| 568820.5 | 417951.6 |                                                   | 236 |
| 97724.17 | 154465.1 | [2M+3Na+H] <sup>+</sup>                           | 33  |
| 550472.4 | 463693.9 |                                                   | 24  |
| 5578738  | 3896737  | [M+Na] <sup>+</sup> 3                             | 353 |
| 403900   | 504962.7 | [511][M+1] <sup>+</sup>                           | 29  |
| 2153698  | 2473571  |                                                   | 146 |
| 1628152  | 849829.9 |                                                   | 134 |
| 11190005 | 1648627  | [375][M] <sup>+</sup>                             | 179 |
| 1630614  | 2383730  | [844][M+1] <sup>+</sup>                           | 225 |
| 284411   | 143194.2 | [2M+H] <sup>+</sup> 3                             | 119 |
| 84640.91 | 43545.37 | [M+Na] <sup>+</sup> 9                             | 100 |
| 1135928  | 914473.1 | [M+H] <sup>+</sup> 79                             | 206 |
| 6425642  | 1932301  |                                                   | 113 |
| 2610827  | 2168667  |                                                   | 175 |
| 2764422  | 3331244  | [307][M] <sup>+</sup>                             | 353 |
| 20977.92 | 11099.84 | [M+Na+HC] <sup>+</sup>                            | 18  |
| 5246214  | 6038731  |                                                   | 169 |
| 2925313  | 995912.7 |                                                   | 40  |
| 257541   | 2275764  | [818][M+1] <sup>2+</sup>                          | 11  |
| 806224.9 | 1702081  | [1365][M] <sup>+</sup> [M+H] <sup>+</sup> 70      | 283 |
| 111325.9 | 107631.1 | [M+H+HCC] <sup>+</sup>                            | 215 |
| 434362.2 | 102517.7 | [1242][M] <sup>+</sup> [M+H] <sup>+</sup> 63      | 47  |
| 11862478 | 9487182  | [M+Na] <sup>+</sup> 6                             | 14  |
| 1421883  | 488122   | [M+K] <sup>+</sup> 34                             | 31  |
| 2590348  | 1845646  | [M+H-C <sub>6</sub> H <sub>6</sub> ] <sup>+</sup> | 100 |
| 4767799  | 2124974  | [M+H-NH <sub>3</sub> ] <sup>+</sup>               | 188 |
| 703083.9 | 305533.7 | [M+H-CH <sub>2</sub> ] <sup>+</sup>               | 31  |
| 11498806 | 9094711  | [1581][M] <sup>+</sup> [M+H] <sup>+</sup> 12      | 191 |
| 242848.7 | 611068.7 |                                                   | 250 |

|          |          |                      |     |
|----------|----------|----------------------|-----|
| 1386451  | 1363989  | [3M+2K-H]            | 289 |
| 51079.06 | 1359378  |                      | 51  |
| 9477517  | 7532289  | [515][M+1]+          | 221 |
| 330674.6 | 30136.21 | [998][M]2+           | 25  |
| 459819   | 548968   | [849][M+2]3+         | 282 |
| 1581492  | 1526455  | [898][M]3+           | 333 |
| 31319.9  | 32127.19 | [M+Na]+ 50           | 100 |
| 83033.91 | 35401207 | [M+K]+ 248           | 192 |
| 18038188 | 1740478  |                      | 28  |
| 4883066  | 4250047  | [1324][M]+ [M+H+NH3  | 14  |
| 352228.2 | 348140.2 |                      | 249 |
| 23998914 | 3.32E+08 | [M+Na]+ 20           | 104 |
| 409005.8 | 1509412  | [1499][M]+ [M+H]+ 84 | 137 |
| 2079721  | 12317590 | [1395][M+1]+         | 275 |
| 607118.6 | 896950.3 |                      | 137 |
| 212274.3 | 301202.9 | [620][M+1]2+         | 29  |
| 732578.6 | 4776858  |                      | 178 |
| 11361.51 | 0        | [1167][M+3]+         | 25  |
| 284422.9 | 1746735  | [M+K]+ 412           | 104 |
| 206457.4 | 149924.8 |                      | 34  |
| 1254690  | 1654623  | [1537][M+1]+         | 66  |
| 15697468 | 10492230 | [1186][M]2+          | 100 |
| 89946.46 | 2547975  | [680][M]+            | 51  |
| 369255.3 | 161441.6 | [803][M+2]+          | 375 |
| 749008.1 | 524393.3 |                      | 215 |
| 102039.7 | 264967   |                      | 318 |
| 1776761  | 969585.2 | [3M+Na]+ :           | 14  |
| 206140.8 | 299512.6 | [M+Na+CF3            | 215 |
| 2433495  | 2708634  | [M+K]+ 527           | 17  |
| 2111860  | 1448948  | [M+2H-C2H            | 100 |
| 2467312  | 6345133  | [954][M+1]2+         | 178 |
| 2342029  | 1192341  |                      | 180 |
| 1474917  | 1422902  | [M+H]+ 457           | 17  |
| 2941852  | 14755036 | [M+Na+HC             | 94  |
| 630737.3 | 545744.7 | [M+Na]+ 40           | 205 |
| 1309305  | 1252657  |                      | 4   |
| 4351301  | 1663613  | [M+K]+ 542           | 24  |
| 508533   | 246520.9 | [M+H-CH2]            | 193 |
| 236448.4 | 172136.8 |                      | 55  |
| 638625.8 | 460353.1 |                      | 256 |
| 9852273  | 8308693  | [1578][M+1]+         | 100 |
| 3726605  | 4143543  |                      | 338 |
| 1800078  | 1574515  |                      | 14  |
| 12580.57 | 15799.03 | [998][M+5]2+         | 25  |
| 202367.1 | 266659.4 |                      | 52  |
| 1904251  | 1154701  | [M+H-C4H8            | 14  |
| 47418.54 | 26325.35 | [M+K]+ 552           | 17  |



|          |          |                       |     |
|----------|----------|-----------------------|-----|
| 20849.91 | 131826.1 |                       | 354 |
| 3180542  | 2416484  |                       | 281 |
| 1305751  | 836225.2 | [M+2K-H]+             | 65  |
| 345915.6 | 275840.1 | [M+H]+ 69:            | 40  |
| 7080865  | 10308050 | [844][M]+             | 225 |
| 88285.5  | 70776.19 | [212][M+1]+           | 223 |
| 516802.3 | 254098.8 | [1410][M+1]+          | 278 |
| 2380811  | 1540019  |                       | 318 |
| 805037.6 | 264458.1 | [521][M+1]+           | 31  |
| 31591425 | 18548076 |                       | 315 |
| 1295014  | 1104911  | [1584][M+2]+          | 219 |
| 809186.9 | 1658863  |                       | 49  |
| 1148135  | 521191.4 |                       | 134 |
| 4250215  | 2849453  | [293][M+1]+           | 217 |
| 76536.67 | 763936.6 |                       | 104 |
| 680724.8 | 2002963  | [242][M+2]+           | 104 |
| 45701.96 | 2201987  | [M+2Na-H]             | 199 |
| 2837266  | 7815159  |                       | 7   |
| 928859.5 | 1341166  | [M+H-NH3]             | 86  |
| 506215.7 | 176783.7 | [M+H+HCC              | 31  |
| 398845.6 | 133958.7 | [M+Na]+ 5!            | 215 |
| 3202302  | 3054968  | [653][M+2]+           | 40  |
| 819118   | 896790.4 | [M+Na+NH              | 144 |
| 256893.5 | 888165.2 | [875][M+1]+           | 27  |
| 1529632  | 1533927  |                       | 401 |
| 75210.71 | 8706.608 | [998][M+3]2+          | 25  |
| 144278.7 | 58386.99 | [549][M+3]+           | 17  |
| 131592   | 274937.3 |                       | 86  |
| 9590.45  | 12173    |                       | 119 |
| 4032790  | 8592227  | [23][M]2+             | 17  |
| 1074551  | 2676169  |                       | 53  |
| 12167.7  | 11924.57 |                       | 29  |
| 243752.7 | 135283.2 |                       | 24  |
| 378941.8 | 136749.5 | [M+H+HCC              | 100 |
| 926433.6 | 2763218  |                       | 275 |
| 574295.3 | 192169.7 | [M+3H-C3†             | 29  |
| 256948   | 186107.7 |                       | 14  |
| 1573361  | 909184.1 |                       | 35  |
| 4232997  | 2590125  |                       | 159 |
| 134247   | 149497.1 |                       | 462 |
| 1550629  | 960242.5 |                       | 180 |
| 933586.7 | 832614   |                       | 140 |
| 8180026  | 10330944 | [593][M]+ [M+Na]+ 3`  | 4   |
| 256328.7 | 88959.15 | [1580][M+3]+          | 100 |
| 1494252  | 1595763  | [1588][M]+ [M+H]+ 14! | 282 |
| 5540535  | 1895041  | [M+K+NaCl             | 40  |
| 107671.5 | 91170.32 | [M+K+HCO              | 17  |

|          |          |                      |     |
|----------|----------|----------------------|-----|
| 2820505  | 3860240  |                      | 222 |
| 10989503 | 8396340  |                      | 251 |
| 956661.6 | 472724.8 | [329][M+1]+          | 16  |
| 82099.96 | 86085.01 | [M+H]+ 38            | 212 |
| 496422.5 | 313997.9 | [M+H-CH2]            | 31  |
| 503833.6 | 411758.1 |                      | 88  |
| 234238.2 | 100750.3 | [3M+Na]+             | 31  |
| 208075.2 | 380574.9 |                      | 33  |
| 0        | 4419185  | [M+K]+ 12            | 350 |
| 708564.8 | 185590.4 | [M+Na]+ 6            | 40  |
| 11762971 | 7566821  |                      | 56  |
| 1537534  | 3075076  |                      | 182 |
| 53943.23 | 152298.3 | [M+K]+ 40            | 55  |
| 6430117  | 4945586  | [M+Na]+ 2            | 112 |
| 284399.4 | 262222.5 | [946][M+1]+          | 11  |
| 3708128  | 2065461  | [509][M]+            | 257 |
| 3536826  | 8798610  | [1412][M]+ [M+H]+ 74 | 173 |
| 3370084  | 1725473  | [M+Na]+ 4            | 24  |
| 5442176  | 3324403  |                      | 198 |
| 33131.39 | 656449.2 | [M+Na]+ 3            | 209 |
| 28435588 | 23511290 | [1560][M]+           | 211 |
| 902826.3 | 819213.9 | [1324][M+1]+         | 14  |
| 6810.056 | 12668.69 |                      | 49  |
| 2901747  | 13643249 | [M+Na+HC             | 192 |
| 1390085  | 424767.1 | [M+K+NH3             | 31  |
| 589536   | 325647.1 | [3M+Na+2I            | 15  |
| 381095.2 | 246284.5 | [997][M+1]+          | 31  |
| 1.75E+08 | 1E+08    |                      | 35  |
| 173822.6 | 145086   | [3M+H+Na             | 15  |
| 986774.6 | 31273075 |                      | 271 |
| 3030320  | 2941156  |                      | 219 |
| 823564.8 | 789379.1 | [M+H-CO]+            | 206 |
| 230347   | 647775   | [408][M+1]+          | 77  |
| 0        | 0        |                      | 39  |
| 11310146 | 14213296 | [552][M]+ [M+K]+ 34  | 26  |
| 35735.88 | 21791.12 |                      | 100 |
| 4042795  | 2899672  | [M+Na]+ 6            | 14  |
| 430895   | 212965.9 |                      | 270 |
| 1026236  | 969296.2 |                      | 456 |
| 1319518  | 1188801  | [1505][M+1]+         | 286 |
| 222400.7 | 154018.8 | [M+K+NaCl            | 29  |
| 162103.3 | 1080744  | [M+H]+ 10            | 80  |
| 292834.4 | 378158.6 | [M+K+NaCl            | 221 |
| 4471842  | 4214258  | [1584][M]+ [M+H]+ 13 | 219 |
| 885847.2 | 1134963  | [1335][M+2]+         | 31  |
| 353034.8 | 203730.6 | [M+Na]+ 3            | 23  |
| 9359.745 | 0        | [M+K]+ 66            | 25  |

|          |          |                      |     |
|----------|----------|----------------------|-----|
| 99014.33 | 258631.6 |                      | 397 |
| 2433991  | 0        |                      | 180 |
| 687415   | 3348455  | [983][M+1]+          | 11  |
| 11932689 | 6807624  | [1477][M+1]+         | 286 |
| 210845.1 | 808689.4 | [M+H]+ 62            | 27  |
| 84877585 | 1.29E+08 | [M+H]+ 37            | 17  |
| 73658.56 | 1830712  |                      | 196 |
| 4088364  | 5615998  | [600][M+4]+          | 4   |
| 1869615  | 699082.2 |                      | 14  |
| 57698.21 | 56904.6  | [1476][M+1]+         | 100 |
| 492142.3 | 40681.01 | [1237][M+2]+         | 29  |
| 106970.1 | 668149.6 | [M+K]+ 34            | 230 |
| 493334.2 | 763400.8 | [1590][M+1]+         | 333 |
| 352896.6 | 1216138  | [468][M+1]+          | 215 |
| 332271.6 | 104579.2 | [1232][M+1]+         | 29  |
| 300716.2 | 224363.4 | [M+Na]+ 3            | 104 |
| 907241.3 | 1050175  | [M+K+NH3             | 40  |
| 6857556  | 3315884  |                      | 300 |
| 25659.77 | 442123.9 | [2M+Na+2             | 199 |
| 60169.92 | 254415.3 |                      | 49  |
| 74768.54 | 195141.7 |                      | 41  |
| 4307989  | 21424572 | [171][M]+ [M+K+NH3   | 199 |
| 5777606  | 8309789  | [1472][M]+ [2M+H]+ 4 | 4   |
| 15562997 | 13206272 | [1578][M]+ [M+H]+ 11 | 100 |
| 10975694 | 5246223  |                      | 40  |
| 212520.7 | 25224.03 | [1242][M+2]+         | 47  |
| 924587.4 | 1518554  | [775][M]+ [2M+H]+ 2  | 268 |
| 519701.3 | 4835596  |                      | 271 |
| 333863.3 | 741326.2 | [3M+2K-H]            | 104 |
| 328710.1 | 289709.9 | [M+2H-CO]            | 112 |
| 91882.87 | 327678.8 |                      | 27  |
| 211747.6 | 135864   |                      | 427 |
| 860433.9 | 744453.3 |                      | 280 |
| 97551.56 | 404953.2 |                      | 292 |
| 3837325  | 3255655  | [1573][M+2]+         | 189 |
| 2708853  | 1474074  | [3M+Na+K             | 31  |
| 9319.428 | 8798.357 | [M+H]+ 47            | 119 |
| 202086   | 183038.3 |                      | 12  |
| 70558.06 | 0        |                      | 29  |
| 1671160  | 1398564  |                      | 415 |
| 892216.5 | 50297.51 |                      | 63  |
| 1865793  | 1934048  |                      | 316 |
| 186545.3 | 154734.6 |                      | 245 |
| 18732271 | 32294853 | [1585][M+2]+         | 1   |
| 7396882  | 5205919  | [419][M+1]+          | 75  |
| 1896701  | 1468139  |                      | 263 |
| 1005784  | 1504488  | [M+2H-CO]            | 100 |

|          |          |                       |     |
|----------|----------|-----------------------|-----|
| 159892.3 | 217095.3 |                       | 181 |
| 2936342  | 2541215  | [1432][M]2+           | 249 |
| 3514942  | 991080   | [M+Na]+ 4!            | 40  |
| 1424274  | 1327946  | [M+H]+ 19!            | 281 |
| 142063.5 | 240952.9 | [1189][M+3]+          | 29  |
| 279704.2 | 286225.1 | [M+K+NaCl             | 120 |
| 506116.3 | 327714.3 |                       | 142 |
| 1549428  | 2005674  | [M+K]+ 33!            | 17  |
| 486133.1 | 658789.3 |                       | 342 |
| 953292.9 | 289985.7 |                       | 24  |
| 195806.2 | 878055.7 | [M+2K]2+ 6            | 259 |
| 33994.37 | 603938.4 | [1222][M+2]+          | 11  |
| 387266.5 | 95804.17 | [549][M+1]+           | 17  |
| 308904.8 | 1189277  |                       | 172 |
| 1321024  | 1034511  | [1354][M+1]2+         | 282 |
| 2044819  | 414932.7 | [1322][M]+            | 75  |
| 32204408 | 23348909 | [1543][M]+ [M+H]+ 96! | 257 |
| 2712214  | 1237756  |                       | 40  |
| 4864344  | 4279318  | [1582][M+1]+          | 202 |
| 3210278  | 3139372  | [1584][M+1]+          | 219 |
| 1452826  | 1824090  |                       | 215 |
| 303708.7 | 442012.2 |                       | 55  |
| 6048194  | 2484816  |                       | 40  |
| 181451   | 188836.8 |                       | 112 |
| 86501.92 | 281731.2 |                       | 116 |
| 221438.9 | 462340.1 | [M+K]+ 30!            | 104 |
| 895758.4 | 365895.2 | [M+Na]+ 7!            | 31  |
| 288101.4 | 379716.2 | [M+K+HCO              | 107 |
| 282594.4 | 88325.73 |                       | 119 |
| 3677168  | 2817212  | [M+K]+ 32!            | 180 |
| 1950716  | 1571761  | [1485][M]2+           | 443 |
| 1353366  | 1085017  | [1424][M+2]+          | 100 |
| 538814.6 | 3137116  |                       | 17  |
| 669380.4 | 340905.2 | [817][M+2]+           | 300 |
| 515465.4 | 79053.96 | [M+K]+ 10!            | 100 |
| 149621.7 | 234500.7 |                       | 157 |
| 4744069  | 2151522  |                       | 156 |
| 2800138  | 2383874  |                       | 251 |
| 2074707  | 917421.8 |                       | 100 |
| 1165915  | 1657233  | [786][M]2+            | 29  |
| 438059.1 | 342707.8 | [M+H]+ 50!            | 249 |
| 1428013  | 481979.5 | [M+Na]+ 1!            | 316 |
| 1547330  | 0        |                       | 180 |
| 20797.74 | 29189.71 | [M+Na+CF:             | 17  |
| 2957195  | 2202701  |                       | 15  |
| 7027054  | 6627170  | [693][M]3+            | 92  |
| 2759060  | 2369309  | [1581][M+2]+          | 191 |

|          |          |              |     |
|----------|----------|--------------|-----|
| 1847815  | 1844357  | [M+K+NaCl    | 17  |
| 190874.7 | 128841.4 | [3M+H+Na     | 49  |
| 73539.08 | 117504.6 |              | 77  |
| 971211   | 564202.4 |              | 64  |
| 184253.7 | 98941.93 | [M+K]+ 44%   | 304 |
| 1107958  | 2074051  | [M+Na]+ 4%   | 31  |
| 230848.9 | 69520.92 |              | 168 |
| 571456.1 | 868468.4 | [1518][M+1]+ | 108 |
| 320143.4 | 1109829  | [242][M+1]+  | 104 |
| 671099   | 624820.5 |              | 55  |
| 45366678 | 67214615 | [1308][M+1]+ | 1   |
| 9918705  | 9167687  | [1082][M]2+  | 201 |
| 249426.9 | 140273.4 |              | 175 |
| 9688372  | 6175252  | [2M+Na]+ 1%  | 14  |
| 154015.3 | 327488.4 |              | 31  |
| 1121382  | 622284.6 |              | 144 |
| 1697503  | 939358.9 | [M+K]+ 33%   | 57  |
| 1297789  | 623220   |              | 40  |
| 393427.3 | 506259.2 | [1321][M+2]+ | 231 |
| 228236   | 281098.1 | [307][M+1]+  | 353 |
| 40293586 | 32109511 | [3M+Na+2H    | 100 |
| 33128.95 | 44587.16 |              | 55  |
| 185721.7 | 12032.89 | [998][M+1]2+ | 25  |
| 339206.5 | 348911   | [M+K]+ 37%   | 309 |
| 106256.9 | 145982.1 |              | 91  |
| 625132.4 | 153130.7 |              | 100 |
| 1030982  | 1625838  | [1518][M]+   | 108 |
| 4717606  | 3220906  | [783][M]2+   | 66  |
| 4951206  | 2877573  | [M+H-CH4]    | 134 |
| 3471587  | 2806673  | [M+H]+ 35%   | 23  |
| 1634394  | 1587081  | [M+2H-NH     | 116 |
| 1789692  | 2100561  | [552][M+1]+  | 26  |
| 1097517  | 770499.9 | [1207][M+1]+ | 100 |
| 724049.2 | 1478445  |              | 304 |
| 2782310  | 4235862  |              | 17  |
| 384422.2 | 1504192  | [1233][M+2]+ | 4   |
| 519399.1 | 148784.7 | [M+H+HCC     | 100 |
| 653139.6 | 683330   | [M+K+NaCl    | 11  |
| 3223002  | 5056020  | [M+Na]+ 2%   | 17  |
| 791073.9 | 632612   | [M+Na]+ 2%   | 15  |
| 7897188  | 13741745 |              | 353 |
| 425295.3 | 172374.5 | [859][M+1]+  | 140 |
| 1814044  | 2994868  | [M+H-CO2]    | 17  |
| 1083491  | 0        |              | 394 |
| 1259791  | 855873.3 |              | 25  |
| 5409082  | 91440236 |              | 104 |
| 95141.12 | 57315.86 | [43][M+1]+   | 223 |

|          |          |                       |     |
|----------|----------|-----------------------|-----|
| 1953050  | 2866430  |                       | 316 |
| 298520.6 | 385656.2 |                       | 105 |
| 391796.5 | 149254.9 | [2M+Na+2I             | 40  |
| 543394   | 600021.9 |                       | 35  |
| 76614.01 | 61014.31 | [1242][M+4]+          | 47  |
| 44430.96 | 125140   | [2M+Na+K]             | 199 |
| 1328779  | 847446.4 |                       | 394 |
| 127980.4 | 887686.7 | [624][M+1]+           | 104 |
| 18368650 | 13048535 |                       | 260 |
| 2403195  | 10520646 | [3M+3Na+I             | 160 |
| 286484.1 | 110369.5 | [M+Na+Na              | 18  |
| 737269.9 | 206712.6 |                       | 14  |
| 614352.4 | 312964.5 |                       | 40  |
| 5906496  | 5990917  | [802][M]+             | 210 |
| 141616.4 | 149237.9 | [998][M+4]2+          | 25  |
| 1404203  | 636679.8 | [549][M+2]+           | 17  |
| 1901992  | 992311.6 |                       | 31  |
| 121293.7 | 12746.96 |                       | 25  |
| 109277.3 | 300070.1 | [M+H-CH4]             | 116 |
| 5331008  | 5012897  | [693][M+1]3+          | 92  |
| 532988.6 | 143583.6 |                       | 134 |
| 281473   | 67625.03 | [M+K+NH3              | 17  |
| 1677165  | 378203.9 | [M+H]+ 56:            | 40  |
| 319193.7 | 2613326  | [1273][M+1]2+         | 11  |
| 1587309  | 65096.08 | [436][M+1]+           | 359 |
| 582362.2 | 232832.2 | [2M+Na+K]             | 100 |
| 10011296 | 820507.8 | [436][M]+             | 359 |
| 161937.5 | 183014.3 |                       | 112 |
| 497672.4 | 272517.3 | [M+H]+ 22:            | 193 |
| 791912   | 343843.7 |                       | 31  |
| 10330278 | 504733.9 |                       | 236 |
| 468081.3 | 685241   |                       | 215 |
| 110855.1 | 3232191  |                       | 178 |
| 517949.9 | 229576.4 |                       | 286 |
| 722029.4 | 96251.53 | [1274][M+1]2+         | 323 |
| 309948.7 | 560321.8 |                       | 101 |
| 585295.5 | 497251.3 | [M+H]+ 48:            | 333 |
| 880850.3 | 662026.6 | [1387][M]+ [M+H]+ 72: | 333 |
| 379904.9 | 77197.02 | [M+Na]+ 9:            | 100 |
| 6488768  | 12171005 | [513][M+2]+           | 17  |
| 723517.6 | 601322.7 | [290][M+1]+           | 104 |
| 675602.4 | 1210180  |                       | 24  |
| 1003269  | 684420   | [3M+2Na+I             | 104 |
| 35791.08 | 92120.77 | [2M+Na+K]             | 49  |
| 5759503  | 3772347  | [M+Na]+ 7:            | 333 |
| 3393517  | 897344.3 |                       | 120 |
| 772879.6 | 382148.6 | [M+Na]+ 4:            | 31  |

|          |          |                       |     |
|----------|----------|-----------------------|-----|
| 420786.7 | 525856.4 |                       | 91  |
| 1867713  | 3201633  | [725][M]3+            | 105 |
| 254407.5 | 102110.1 | [M+2Na-H]             | 272 |
| 106274.8 | 26512.01 |                       | 119 |
| 298479.8 | 576698.7 |                       | 238 |
| 810575.1 | 56406.01 |                       | 236 |
| 1162353  | 941356.4 | [1367][M+3]+          | 100 |
| 7571330  | 8037341  | [211][M+1]2+          | 25  |
| 1537119  | 975988.9 | [M+Na]+ 3:            | 31  |
| 5324155  | 2353939  | [947][M]+             | 147 |
| 18834.26 | 485984.3 |                       | 178 |
| 4366463  | 3551428  | [1553][M+2]+          | 260 |
| 734219.7 | 57153.79 |                       | 251 |
| 34128.36 | 883242.7 |                       | 230 |
| 29733039 | 24267385 |                       | 260 |
| 3625919  | 2793032  | [1578][M+2]+          | 100 |
| 31737.81 | 10770.55 | [M+K]+ 62:            | 29  |
| 1100764  | 627388.2 | [M+H-H2O]             | 24  |
| 19128413 | 19435790 | [1573][M]+ [M+H]+ 11: | 189 |
| 243079.5 | 263591.8 |                       | 379 |
| 129161.7 | 140927.2 |                       | 389 |
| 11990298 | 10183931 | [1573][M+1]+          | 189 |
| 52094.33 | 35594.99 |                       | 175 |
| 376387.5 | 144297.5 |                       | 222 |
| 22389276 | 23961728 | [600][M+3]3+          | 4   |
| 271002.9 | 73246.92 | [M+H]+ 95:            | 100 |
| 309987.4 | 100032.5 | [959][M+1]+           | 60  |
| 6091333  | 5002249  |                       | 100 |
| 220468.1 | 119632.2 | [M+H-CH4]             | 23  |
| 377092.2 | 346195.8 | [1085][M+1]+          | 75  |
| 14610672 | 22351244 | [513][M+1]+           | 17  |
| 575495.8 | 176227.6 | [1236][M+1]2+         | 130 |
| 167960.3 | 2160407  |                       | 245 |
| 2576050  | 1622736  |                       | 1   |
| 471884.3 | 433216.1 |                       | 77  |
| 1320521  | 1575541  | [211][M+4]2+          | 25  |
| 4392528  | 3853453  | [1565][M+2]+          | 201 |
| 12038494 | 8869247  | [123][M]+             | 15  |
| 94313.36 | 46633.42 |                       | 175 |
| 3466487  | 2891262  | [1531][M+2]+          | 256 |
| 43191.82 | 20466.02 |                       | 175 |
| 22914.67 | 530278.2 |                       | 427 |
| 11163484 | 21559431 | [380][M+1]3+          | 1   |
| 1332526  | 1264418  | [M+K]+ 51:            | 339 |
| 972534.9 | 1605704  | [1503][M+1]+          | 60  |
| 398450.2 | 575831.4 | [M+H]+ 29:            | 289 |
| 0        | 0        |                       | 49  |

|          |          |                                              |     |
|----------|----------|----------------------------------------------|-----|
| 1436050  | 2513118  | [M+H] <sup>+</sup> 31                        | 289 |
| 257640.5 | 406188.6 | [334][M] <sup>+</sup> [M+H+NH <sub>3</sub>   | 221 |
| 1331711  | 1163968  | [2M+H+K] <sup>2+</sup>                       | 15  |
| 19015.96 | 74039.05 |                                              | 77  |
| 2807943  | 2598862  | [M+Na] <sup>+</sup> 8                        | 66  |
| 7378401  | 7459160  | [1582][M] <sup>+</sup> [M+H] <sup>+</sup> 12 | 202 |
| 300308.9 | 325005.5 |                                              | 456 |
| 40699.35 | 0        | [M+K+NaCl                                    | 47  |
| 836286.9 | 722572.7 |                                              | 14  |
| 1304923  | 1101988  | [414][M] <sup>+</sup> [M+Na] <sup>+</sup> 3  | 15  |
| 703734.5 | 125057.2 | [1322][M+1] <sup>+</sup>                     | 75  |
| 163202.9 | 123050.8 |                                              | 202 |
| 2.22E+08 | 1.91E+08 | [403][M+1] <sup>+</sup>                      | 15  |
| 1583436  | 1048294  | [3M+2K-H]                                    | 31  |
| 752034.8 | 283286.2 | [M+K] <sup>+</sup> 29                        | 112 |
| 20773613 | 32098494 | [283][M] <sup>+</sup>                        | 106 |
| 65440.89 | 68646.79 | [M+H] <sup>+</sup> 27                        | 119 |
| 208488.7 | 239994.7 | [M+H] <sup>+</sup> 34                        | 116 |
| 105678.7 | 76435.52 | [M+H] <sup>+</sup> 30                        | 49  |
| 2109406  | 1231849  |                                              | 100 |
| 2971.029 | 0        |                                              | 39  |
| 882715.8 | 112615.4 | [1274][M] <sup>2+</sup>                      | 323 |
| 190638.5 | 1033467  | [M+H] <sup>+</sup> 63                        | 11  |
| 226189.1 | 282035.6 |                                              | 280 |
| 690411.6 | 1494161  | [23][M+1] <sup>2+</sup>                      | 17  |
| 27493.22 | 261616.7 | [M+K] <sup>+</sup> 43                        | 88  |
| 325504   | 222094.6 | [692][M+1] <sup>+</sup>                      | 313 |
| 638154.5 | 346373.3 |                                              | 188 |
| 25050.93 | 434065.7 | [M+H-CO] <sup>+</sup>                        | 104 |
| 55268.65 | 70639.79 | [1461][M+1] <sup>+</sup>                     | 202 |
| 8.32E+08 | 7.23E+08 | [403][M] <sup>+</sup>                        | 15  |
| 587171.9 | 425075.4 | [1513][M+3] <sup>+</sup>                     | 270 |
| 296645   | 115655.4 | [748][M+1] <sup>+</sup>                      | 206 |
| 1153162  | 902857.6 | [397][M+2] <sup>3+</sup>                     | 25  |
| 801039.9 | 868483.1 | [211][M+3] <sup>2+</sup>                     | 25  |
| 36158843 | 10900906 | [M+K] <sup>+</sup> 32                        | 119 |
| 7288068  | 5479065  | [172][M] <sup>+</sup> [M+H-H <sub>2</sub> O] | 14  |
| 74648.57 | 19511587 | [M+K] <sup>+</sup> 24                        | 180 |
| 28591.74 | 46661.01 | [M+K+NaCl                                    | 238 |
| 293772.4 | 252712   | [888][M+1] <sup>+</sup>                      | 25  |
| 207715.3 | 158658.9 | [848][M+2] <sup>+</sup>                      | 223 |
| 2296751  | 1862431  | [M+K] <sup>+</sup> 22                        | 15  |
| 230666.9 | 123038.7 | [M+K+HCO                                     | 23  |
| 41484.49 | 29707.62 | [742][M] <sup>3+</sup>                       | 39  |
| 6147884  | 3896396  | [1331][M+1] <sup>+</sup>                     | 24  |
| 14252576 | 9232926  | [1331][M] <sup>+</sup>                       | 24  |
| 1200402  | 65873.85 | [1131][M+1] <sup>+</sup>                     | 217 |



|          |          |                     |     |
|----------|----------|---------------------|-----|
| 45671930 | 17206881 | [293][M]+ [M+H-H2O] | 217 |
| 106355.8 | 76724.88 | [740][M+2]+         | 223 |
| 674039.5 | 290477.3 | [M+Na]+ 4           | 188 |
| 150251.8 | 22047.82 | [842][M+1]+         | 113 |
| 357843.6 | 162993   | [3M+2Na+I           | 29  |
| 312171.8 | 320988   |                     | 389 |
| 1411360  | 1024007  |                     | 128 |
| 1579377  | 2582183  | [1363][M]+          | 70  |
| 2533800  | 2407982  | [173][M]+           | 31  |
| 201251.9 | 477566.7 |                     | 230 |
| 1442385  | 627428   | [M+Na]+ 8           | 31  |
| 2786970  | 1393381  | [536][M+1]+         | 205 |
| 208522.3 | 422914.8 |                     | 14  |
| 57792.41 | 257231.3 | [1381][M+1]+        | 69  |
| 161863.3 | 60169.56 |                     | 52  |
| 1561905  | 885145.5 |                     | 14  |
| 212592.5 | 227479.2 | [M+K+NH3            | 40  |
| 901221.6 | 1437667  |                     | 289 |
| 2909255  | 3319802  | [417][M]+           | 15  |
| 25889536 | 20966936 | [403][M+2]+         | 15  |
| 3692274  | 5625505  | [283][M+1]+         | 106 |
| 3748264  | 2611631  |                     | 100 |
| 2601243  | 6083948  |                     | 38  |
| 38835.12 | 144353.2 | [1247][M+1]+        | 159 |
| 3058062  | 3442868  | [396][M]+ [M+H-C5H8 | 15  |
| 61933.82 | 536240.3 | [M+K]+ 38           | 155 |
| 2603606  | 731698.6 |                     | 40  |
| 1436160  | 2081756  |                     | 336 |
| 2054271  | 1641149  |                     | 23  |
| 392480.8 | 503166.7 |                     | 114 |
| 407430   | 229587.7 | [940][M+2]+         | 300 |
| 1179229  | 626579.2 | [M+K+HCO            | 14  |
| 689065.1 | 287780.8 | [1344][M+1]+        | 40  |
| 12775496 | 13565030 | [1565][M+1]+        | 201 |
| 374176.3 | 629802.4 |                     | 362 |
| 874439.7 | 758807   |                     | 11  |
| 6182540  | 3541490  | [1401][M]+          | 34  |
| 1106219  | 263242.1 | [997][M+2]+         | 31  |
| 615013.9 | 442288.1 | [M+K]+ 35           | 14  |
| 1502445  | 0        | [3M+Na+2I           | 180 |
| 981998.8 | 7856.814 |                     | 236 |
| 293902.5 | 1395679  |                     | 104 |
| 15085821 | 31603346 |                     | 86  |
| 301335.1 | 392583   | [M+Na]+ 8           | 27  |
| 315032.1 | 132642.3 | [M+H+HCC            | 31  |
| 0        | 689125.4 |                     | 311 |
| 93951.05 | 54919.38 |                     | 470 |

|          |          |                       |     |
|----------|----------|-----------------------|-----|
| 916852   | 806997.5 |                       | 144 |
| 763880.2 | 205306.7 |                       | 24  |
| 534787.8 | 1849159  |                       | 304 |
| 578710.7 | 181223.5 | [3M+H+K]2             | 31  |
| 731437.9 | 2215386  |                       | 4   |
| 2741723  | 1429795  | [M+H-CH4]             | 205 |
| 345616.2 | 804822   | [M+Na]+ 2'            | 17  |
| 282044.9 | 3118707  |                       | 258 |
| 57708726 | 94753338 | [1585][M]+            | 1   |
| 1130624  | 1871002  | [M+H]+ 58'            | 119 |
| 750968.7 | 639381.3 | [M+K]+ 37'            | 16  |
| 94902.11 | 10402.32 | [M+H+HCC              | 47  |
| 228224.1 | 2508391  |                       | 155 |
| 262684.1 | 1083601  | [M+H-CO]+             | 49  |
| 938813.1 | 317632.8 | [M+H-H2O]             | 316 |
| 35483.64 | 5231.657 |                       | 148 |
| 326529.9 | 69527.74 |                       | 206 |
| 480682   | 90848.54 | [956][M]2+            | 25  |
| 9398722  | 4734842  | [M+H]+ 47'            | 180 |
| 441383.8 | 94038.06 |                       | 31  |
| 345380.4 | 243445.5 | [2M+2Na+I             | 40  |
| 1517465  | 694313.1 | [M+H+K]2+             | 25  |
| 227235.9 | 177329.9 | [1580][M+2]+          | 100 |
| 1272999  | 305955.9 |                       | 322 |
| 54873689 | 42148954 |                       | 201 |
| 150128.1 | 17118.2  | [2M+Na+K]             | 17  |
| 32538.34 | 0        | [M+Na]+ 6'            | 25  |
| 675765.3 | 5227713  | [1222][M+1]+          | 11  |
| 307916.5 | 409466.3 | [M+K]+ 49'            | 289 |
| 6217282  | 8221243  | [M+K+NH3              | 26  |
| 4578070  | 3083233  | [2M+Na]+ :            | 24  |
| 288183.6 | 251793.2 | [848][M+1]+           | 223 |
| 108394.9 | 825045.6 | [364][M+2]+           | 196 |
| 26661135 | 20706576 | [1513][M]+ [M+H]+ 87' | 270 |
| 2128037  | 1223956  | [1401][M+1]+          | 34  |
| 469395.9 | 387524.8 |                       | 115 |
| 119431   | 453980.9 | [335][M+1]+           | 86  |
| 1638169  | 1236482  | [M+K+NH3              | 157 |
| 9299671  | 7244354  |                       | 249 |
| 1426760  | 1240598  |                       | 357 |
| 147615.5 | 226654.1 |                       | 29  |
| 2936213  | 3241219  | [361][M]2+ [M+2H-CO   | 29  |
| 332847.3 | 455051.3 | [M+H+Na]2             | 29  |
| 1361815  | 1064383  |                       | 45  |
| 3155525  | 23474600 | [1465][M+1]+          | 223 |
| 226060.7 | 190295.9 |                       | 206 |
| 1590153  | 567055.8 | [M+K]+ 33'            | 101 |

|          |          |                      |     |
|----------|----------|----------------------|-----|
| 4509751  | 2172610  | [1344][M]+ [M+K]+ 65 | 40  |
| 3052078  | 2830384  | [M+Na]+ 4            | 17  |
| 1114650  | 1256764  | [3M+H+Na             | 104 |
| 2764122  | 1706140  | [1342][M+2]+         | 25  |
| 158759.7 | 330700   | [884][M+1]+          | 160 |
| 591120.4 | 807075.7 | [410][M+1]+          | 124 |
| 1306071  | 250000.9 |                      | 40  |
| 1387529  | 1274610  |                      | 15  |
| 833137.9 | 237824.3 | [M+2Na-H]            | 14  |
| 1435125  | 0        |                      | 236 |
| 1236115  | 1104274  | [986][M+1]3+         | 206 |
| 1381787  | 553839.6 | [1232][M]+ [M+K+NaCl | 29  |
| 1164058  | 867389.8 | [540][M+2]2+         | 25  |
| 171615.4 | 306575.3 |                      | 289 |
| 1238372  | 173152.8 | [655][M]+            | 279 |
| 1071691  | 1141896  | [989][M+1]3+         | 197 |
| 84472.72 | 94955.41 | [2M+Na]+ :           | 31  |
| 1836081  | 2674029  |                      | 325 |
| 910447.5 | 3140201  | [1541][M]+           | 9   |
| 7654973  | 5713128  | [1013][M]2+          | 211 |
| 1038887  | 738797.4 |                      | 215 |
| 0        | 204705.6 | [1089][M+3]+         | 2   |
| 0        | 9015.881 |                      | 91  |
| 146032.2 | 80480.25 | [485][M+1]+          | 223 |
| 346137.8 | 447333.5 | [188][M+1]2+         | 151 |
| 263445.4 | 565570.9 |                      | 152 |
| 7427245  | 56173127 | [1465][M]+           | 223 |
| 221745.1 | 191804.8 |                      | 336 |
| 24556247 | 44865718 |                      | 1   |
| 7223157  | 3688611  | [473][M+1]+          | 119 |
| 8791965  | 6094947  | [1581][M+1]+         | 191 |
| 365312.8 | 567582.9 | [1400][M+1]+         | 31  |
| 7139165  | 3484255  |                      | 24  |
| 412227.8 | 453061.4 |                      | 144 |
| 706321.3 | 42521.37 |                      | 272 |
| 4811253  | 5166523  | [589][M+1]+          | 4   |
| 1181014  | 1728970  |                      | 104 |
| 1121784  | 785528.3 | [902][M+3]+          | 25  |
| 69023.54 | 2472994  |                      | 55  |
| 3823368  | 380643.5 | [1131][M]+           | 217 |
| 49698.28 | 1734220  | [3M+2Na+I            | 230 |
| 160702   | 35252.86 |                      | 32  |
| 3258296  | 3825306  | [2M+H+K]2            | 11  |
| 4105189  | 6010592  | [M+K+NaCl            | 17  |
| 344868.9 | 240955   | [998][M+2]2+         | 25  |
| 266138.1 | 197689.5 | [1264][M+1]+         | 205 |
| 127728.8 | 78060.75 |                      | 119 |

|          |          |                                               |     |
|----------|----------|-----------------------------------------------|-----|
| 242055   | 103981.4 | [M+H] <sup>+</sup> 390                        | 112 |
| 4266507  | 4456874  | [211][M+2] <sup>2+</sup>                      | 25  |
| 24737    | 663526.4 | [3M+Na] <sup>+</sup>                          | 49  |
| 146289.1 | 644541.9 |                                               | 381 |
| 2479725  | 2904833  | [1321][M+1] <sup>+</sup>                      | 231 |
| 131009.5 | 864355.6 | [M+K] <sup>+</sup> 160                        | 117 |
| 4143385  | 1573547  | [M+Na] <sup>+</sup> 60                        | 120 |
| 253521.6 | 599150.8 | [1417][M+1] <sup>+</sup>                      | 225 |
| 8090612  | 7975123  | [739][M] <sup>+</sup> [M+H+NH <sub>3</sub>    | 75  |
| 5637.119 | 7254.397 | [M+Na+HC                                      | 47  |
| 1157915  | 927867.8 |                                               | 25  |
| 2155054  | 3617702  |                                               | 1   |
| 993004.7 | 8436885  | [3M+H+Na                                      | 117 |
| 510589.6 | 2195904  | [M+K+CF <sub>3</sub> C                        | 104 |
| 18808.22 | 895614.5 |                                               | 73  |
| 14454984 | 11497903 | [1543][M+1] <sup>+</sup>                      | 257 |
| 6467222  | 3265450  | [M+K] <sup>+</sup> 430                        | 13  |
| 390507   | 253088.3 | [2M+Na+K]                                     | 26  |
| 1136637  | 758220   |                                               | 260 |
| 147357.9 | 0        | [1277][M+1] <sup>+</sup>                      | 47  |
| 1503620  | 739363.8 |                                               | 203 |
| 83504.15 | 274312.9 |                                               | 80  |
| 3535186  | 5328141  | [980][M] <sup>+</sup>                         | 11  |
| 437663.8 | 95436.74 | [1229][M] <sup>+</sup> [M+H+CF <sub>3</sub> C | 52  |
| 62408943 | 52348511 | [M+Na] <sup>+</sup> 5                         | 100 |
| 2270291  | 2987824  | [1472][M+1] <sup>+</sup>                      | 4   |
| 184808.2 | 172531.8 |                                               | 26  |
| 98415.42 | 369040.2 |                                               | 55  |
| 165417.8 | 70874.94 | [M+Na] <sup>+</sup> 3                         | 24  |
| 31414278 | 1.22E+08 |                                               | 165 |
| 158883.6 | 255175.1 | [844][M+2] <sup>+</sup>                       | 225 |
| 717881.7 | 756895.7 | [417][M+1] <sup>+</sup>                       | 15  |
| 2724621  | 20377334 | [1222][M] <sup>+</sup> [M+H-CH <sub>2</sub> ] | 11  |
| 878703.7 | 2223413  |                                               | 69  |
| 1139465  | 629938.7 |                                               | 10  |
| 114374.4 | 264132.5 |                                               | 127 |
| 67986.71 | 76218.16 | [M+Na] <sup>+</sup> 2                         | 199 |
| 6289.86  | 0        |                                               | 148 |
| 160568.5 | 307948.8 | [1523][M+1] <sup>+</sup>                      | 147 |
| 375735.2 | 206078.9 | [667][M+2] <sup>+</sup>                       | 272 |
| 371501.5 | 160105.2 | [M+Na+HC                                      | 55  |
| 4727235  | 4051464  | [M+2H] <sup>2+</sup> 1                        | 25  |
| 472567.4 | 170158.6 | [M+H] <sup>+</sup> 67                         | 18  |
| 1094306  | 754719.3 |                                               | 42  |
| 40258448 | 30789782 |                                               | 202 |
| 2348601  | 2585995  |                                               | 11  |
| 21512.2  | 18328.75 |                                               | 148 |

|          |          |                       |     |
|----------|----------|-----------------------|-----|
| 996053.4 | 971105.5 | [233][M+2]+           | 31  |
| 9287555  | 12203408 | [422][M]2+ [M+2H-H2O] | 29  |
| 248644.8 | 7416.667 | [956][M+1]2+          | 25  |
| 707754   | 126481.3 | [M+H+HCC]             | 31  |
| 151740.9 | 854561.7 | [364][M+1]+           | 196 |
| 430545   | 1227139  | [1206][M+1]+          | 52  |
| 9298.435 | 66671.25 | [M+Na]+ 3!            | 49  |
| 659730.3 | 971664.9 |                       | 3   |
| 104035.2 | 108653.2 |                       | 49  |
| 108608.2 | 85641.73 |                       | 26  |
| 185834.9 | 233604.3 |                       | 89  |
| 148155.4 | 306479   |                       | 52  |
| 276492.8 | 339755.3 | [M+Na]+ 4!            | 212 |
| 972986.2 | 272506.3 |                       | 388 |
| 157058.4 | 66371.16 |                       | 300 |
| 1935425  | 1794488  | [M+Na]+ 2!            | 158 |
| 139541.4 | 4771895  | [M+Na+NH]             | 199 |
| 16000.55 | 681358   |                       | 155 |
| 295333.9 | 344766.8 | [M+K]+ 63!            | 289 |
| 7096971  | 2936389  |                       | 160 |
| 1.25E+08 | 1.88E+08 | [1308][M]+            | 1   |
| 22428.28 | 12828.24 | [M+H-C3H6]            | 29  |
| 350838.4 | 242591.3 | [542][M+1]+           | 8   |
| 12875221 | 20071017 | [M+H]+ 36!            | 29  |
| 186149.9 | 202450   |                       | 284 |
| 14776045 | 12447142 |                       | 333 |
| 383844.3 | 367098.2 |                       | 222 |
| 176388.2 | 17606.88 |                       | 277 |
| 1137862  | 661248.2 |                       | 222 |
| 3703345  | 1266578  |                       | 29  |
| 373606.7 | 160735.4 | [M+2K-H]+             | 40  |
| 20902718 | 27061317 | [53][M+1]+            | 2   |
| 2082913  | 87231.45 |                       | 179 |
| 3294975  | 8277194  | [44][M+1]+            | 152 |
| 1342630  | 3016599  | [1417][M]+            | 225 |
| 2502049  | 35248873 |                       | 184 |
| 1110578  | 2072064  |                       | 119 |
| 100840.4 | 953490.8 | [1381][M]+            | 69  |
| 28076443 | 28890398 | [211][M]2+            | 25  |
| 1200636  | 1730934  |                       | 49  |
| 32535.13 | 33801.79 |                       | 148 |
| 752101.4 | 2747485  |                       | 198 |
| 257425.1 | 8303431  | [797][M]+ [M+K+HCO]   | 55  |
| 2979335  | 1240247  | [940][M]+             | 300 |
| 990216.7 | 974155.8 | [M+Na]+ 3!            | 40  |
| 43522.03 | 247571.6 |                       | 218 |
| 925940.4 | 789821.5 |                       | 197 |

|          |          |                                               |     |
|----------|----------|-----------------------------------------------|-----|
| 56216.55 | 15333.75 | [M+H] <sup>+</sup> 530                        | 376 |
| 10897791 | 6859460  |                                               | 287 |
| 1714288  | 1513271  | [M+K+NH <sub>3</sub> ]                        | 17  |
| 3044864  | 2112552  | [M+K+NH <sub>3</sub> ]                        | 15  |
| 800703.6 | 194229.5 | [M+K+NaCl]                                    | 40  |
| 641688.7 | 159681.1 | [2M+2Na+H]                                    | 40  |
| 84423.52 | 77310.04 |                                               | 105 |
| 4250453  | 16704612 | [1592][M+1] <sup>2+</sup>                     | 6   |
| 82424.12 | 0        |                                               | 29  |
| 37341.31 | 182519.9 |                                               | 152 |
| 599467.7 | 678214.1 | [M+Na] <sup>+</sup> 40                        | 4   |
| 19702594 | 14010713 |                                               | 282 |
| 28048680 | 23711463 | [1553][M] <sup>+</sup> [M+H] <sup>+</sup> 100 | 260 |
| 403667   | 178883.3 |                                               | 289 |
| 950209.2 | 632660.6 |                                               | 240 |
| 1052357  | 802870.4 | [43][M] <sup>+</sup>                          | 223 |
| 0        | 0        | [M+Na] <sup>+</sup> 40                        | 49  |
| 793745.2 | 626994.2 | [M+Na] <sup>+</sup> 40                        | 100 |
| 1183883  | 1154285  | [802][M+1] <sup>+</sup>                       | 210 |
| 2153055  | 1422790  | [1336][M] <sup>+</sup> [M+K] <sup>+</sup> 650 | 24  |
| 4548943  | 5715634  | [460][M] <sup>+</sup>                         | 29  |
| 201199.5 | 1800084  |                                               | 321 |
| 105126.5 | 147471.5 |                                               | 222 |
| 466902.6 | 447079.6 |                                               | 266 |
| 0        | 326399.1 |                                               | 49  |
| 1478176  | 1616486  | [M+H] <sup>+</sup> 180                        | 311 |
| 44319222 | 67538082 | [1326][M+1] <sup>+</sup>                      | 1   |
| 846030.1 | 1175444  |                                               | 389 |
| 422386   | 404864.5 |                                               | 14  |
| 149054.4 | 461850.5 | [871][M+1] <sup>+</sup>                       | 10  |
| 120999.4 | 273879.1 | [M+H-H <sub>2</sub> O]                        | 29  |
| 713291.8 | 649474.9 | [M+2H-CH <sub>3</sub> ]                       | 25  |
| 29421.87 | 0        | [M+H-C <sub>2</sub> H <sub>5</sub> ]          | 76  |
| 3877954  | 4651592  | [410][M] <sup>+</sup>                         | 124 |
| 1625798  | 1937687  | [731][M+2] <sup>+</sup>                       | 11  |
| 657412.5 | 1211138  | [M+K] <sup>+</sup> 250                        | 304 |
| 29260.55 | 35085.17 |                                               | 108 |
| 445513.8 | 564076.8 |                                               | 180 |
| 668159.2 | 751835.8 |                                               | 209 |
| 120780.8 | 286755.3 |                                               | 289 |
| 5401103  | 2156893  | [817][M] <sup>+</sup>                         | 300 |
| 690735.7 | 542589.5 | [M+H-H <sub>2</sub> O]                        | 193 |
| 235573.8 | 1707771  | [171][M+1] <sup>+</sup>                       | 199 |
| 4637345  | 5642583  | [1317][M+1] <sup>+</sup>                      | 63  |
| 957143.6 | 597157.5 | [485][M] <sup>+</sup>                         | 223 |
| 233891.9 | 180773.9 |                                               | 256 |
| 969631.5 | 345359.2 | [549][M+4] <sup>+</sup>                       | 17  |

|          |          |                      |     |
|----------|----------|----------------------|-----|
| 9664.389 | 965232   | [3M+H+K]2            | 199 |
| 1040237  | 450005   |                      | 283 |
| 3206091  | 2463705  | [1367][M+2]+         | 100 |
| 148190.4 | 453617.5 | [M+Na]+ 30           | 120 |
| 647603.7 | 77615.5  | [375][M+1]+          | 179 |
| 225840.7 | 112765.1 | [M+2H-HC             | 24  |
| 38701955 | 80629073 | [1585][M+1]+         | 1   |
| 269243.5 | 439121   |                      | 290 |
| 1000580  | 678100.2 | [M+K]+ 36            | 250 |
| 498384.1 | 89450.79 | [1355][M+1]+         | 25  |
| 3071285  | 1896804  | [1286][M]+           | 56  |
| 1282344  | 1402288  |                      | 52  |
| 3283958  | 3121098  | [1511][M]+ [M+H-CH3] | 11  |
| 2686493  | 2190139  |                      | 291 |
| 16112130 | 12686454 | [1560][M+1]+         | 211 |
| 210009.1 | 1249056  |                      | 88  |
| 2812720  | 5414447  |                      | 17  |
| 3128985  | 2313319  | [1513][M+2]+         | 270 |
| 498853.6 | 1220765  |                      | 77  |
| 70363.39 | 692515   |                      | 299 |
| 522004.5 | 331098.7 | [3M+H+K]2            | 31  |
| 700930.9 | 777524.8 | [396][M+1]+          | 15  |
| 23265624 | 24532657 | [589][M]+            | 4   |
| 764919.6 | 810150.9 |                      | 245 |
| 68166.81 | 397001.6 |                      | 353 |
| 617727   | 452788.6 | [M+2H]2+ !           | 25  |
| 536479.6 | 1021691  | [M+H]+ 38!           | 218 |
| 32366009 | 22340693 | [914][M]+ [M+Na]+ 4  | 23  |
| 46624.76 | 45922.54 |                      | 148 |
| 6673746  | 7248275  | [1321][M]+           | 231 |
| 366564.5 | 876807.4 | [M+H-C6H:            | 104 |
| 607356.4 | 872656.1 | [751][M+4]+          | 215 |
| 923334.8 | 418320.5 | [1259][M+1]+         | 23  |
| 772807.4 | 2052123  |                      | 304 |
| 58227315 | 44466093 |                      | 202 |
| 503822.3 | 618811.2 |                      | 10  |
| 171625.9 | 260867.4 |                      | 435 |
| 12279319 | 16338637 | [181][M]+            | 29  |
| 12214170 | 11830044 |                      | 157 |
| 437126.4 | 388188.6 | [690][M+1]+          | 391 |
| 680169.8 | 239815.1 |                      | 1   |
| 517292.1 | 88859.53 | [1580][M]+           | 100 |
| 1584383  | 1595293  | [986][M]3+ [3M+3H]3+ | 206 |
| 466374.5 | 90621.6  | [M+H-COCl            | 25  |
| 280783.6 | 614472.7 |                      | 393 |
| 361612.1 | 167051.4 |                      | 312 |
| 4643133  | 2432213  | [1259][M]+ [M+K]+ 60 | 23  |

|          |          |                                               |     |
|----------|----------|-----------------------------------------------|-----|
| 412812   | 1093658  |                                               | 31  |
| 331631   | 501211.4 | [M+H] <sup>+</sup> 71!                        | 116 |
| 4279328  | 5081802  |                                               | 102 |
| 1606411  | 1143699  | [123][M+1] <sup>+</sup>                       | 15  |
| 16124.72 | 839607.8 |                                               | 404 |
| 754867.7 | 810804.8 | [1573][M+3] <sup>+</sup>                      | 189 |
| 3321599  | 0        | [M+K] <sup>+</sup> 24!                        | 311 |
| 94688.94 | 1220243  | [1541][M+1] <sup>+</sup>                      | 9   |
| 1845072  | 1451403  | [200][M+1] <sup>+</sup>                       | 320 |
| 3739983  | 3858870  | [M+H] <sup>+</sup> 60!                        | 121 |
| 1514164  | 4026425  | [1412][M+1] <sup>+</sup>                      | 173 |
| 1378275  | 419314.3 | [M+K+CF <sub>3</sub> C]                       | 120 |
| 1100767  | 388747.8 | [M+K] <sup>+</sup> 66!                        | 251 |
| 105896.7 | 421476.3 | [2M+Na+K]                                     | 49  |
| 749597.1 | 329303.9 |                                               | 40  |
| 326729.6 | 275069.2 | [M+H] <sup>+</sup> 38!                        | 342 |
| 1679827  | 463368.5 |                                               | 29  |
| 10862346 | 773501.8 |                                               | 182 |
| 303476   | 1485383  | [M+Na+CF <sub>3</sub> C]                      | 104 |
| 1626441  | 1385738  | [M+Na] <sup>+</sup> 2!                        | 51  |
| 588343.1 | 529151.1 | [798][M+1] <sup>+</sup>                       | 223 |
| 12630596 | 6709961  |                                               | 300 |
| 86589.65 | 152785.7 | [M+2K] <sup>2+</sup> 8                        | 138 |
| 863268.9 | 128084.4 |                                               | 40  |
| 1673908  | 960416.3 | [1455][M] <sup>+</sup>                        | 34  |
| 115585   | 237509.4 | [622][M+1] <sup>+</sup>                       | 117 |
| 14968525 | 10524011 | [1531][M+1] <sup>+</sup>                      | 256 |
| 380611.6 | 3350065  | [M+Na+Na]                                     | 104 |
| 120013.7 | 320253.1 | [413][M+1] <sup>2+</sup>                      | 138 |
| 3248767  | 1917007  | [M+H-COCl]                                    | 8   |
| 3911863  | 1520766  | [476][M] <sup>+</sup>                         | 89  |
| 12244826 | 9864811  | [1139][M] <sup>2+</sup>                       | 189 |
| 618451.3 | 473607.7 | [892][M] <sup>+</sup>                         | 25  |
| 8010275  | 10493937 | [608][M] <sup>+</sup> [M+Na] <sup>+</sup> 3!  | 4   |
| 21613681 | 2063109  | [616][M] <sup>+</sup>                         | 90  |
| 446207.9 | 153246.4 |                                               | 25  |
| 31125.53 | 61027.77 |                                               | 194 |
| 72484.16 | 784627.8 | [M+H-CH <sub>4</sub> ]                        | 11  |
| 131306.4 | 51514.43 | [187][M+1] <sup>+</sup>                       | 55  |
| 20234009 | 2030399  |                                               | 89  |
| 598315.6 | 672404.7 | [2M+Na] <sup>+</sup> 1!                       | 119 |
| 11413323 | 7307531  | [235][M+1] <sup>+</sup>                       | 40  |
| 641701.3 | 70961.67 | [1434][M] <sup>+</sup> [M+H] <sup>+</sup> 75! | 33  |
| 635778.2 | 175988.4 |                                               | 300 |
| 1150792  | 1270608  |                                               | 27  |
| 1826380  | 237001.8 |                                               | 241 |
| 1584199  | 5242221  | [3M+2Na] <sup>2+</sup>                        | 11  |



|          |          |                     |     |
|----------|----------|---------------------|-----|
| 741171.8 | 233759.8 |                     | 300 |
| 125294.3 | 473700.6 | [M+K]+ 29           | 14  |
| 523922.9 | 427521.6 |                     | 139 |
| 128492.7 | 177548.1 |                     | 372 |
| 3352018  | 7446569  | [9][M+1]+           | 152 |
| 476591.9 | 526196.6 | [180][M+1]+         | 61  |
| 6248747  | 4389470  |                     | 206 |
| 1.14E+08 | 1.83E+08 | [1326][M]+          | 1   |
| 3980512  | 5841624  |                     | 49  |
| 4728079  | 6514755  | [M+Na]+ 3           | 4   |
| 605441.8 | 313983.2 |                     | 251 |
| 176120.5 | 371656.2 | [M+Na]+ 3           | 107 |
| 35073214 | 47227175 | [M+2K]2+ 5          | 29  |
| 697333.2 | 467155.9 | [803][M]+ [M+H]+ 46 | 375 |
| 520347.8 | 159312.9 | [1385][M+1]+        | 100 |
| 960670   | 828733.1 |                     | 256 |
| 13111468 | 12530006 | [1262][M]2+         | 202 |
| 391905.1 | 250245   | [427][M+1]+         | 381 |
| 178816.4 | 139383.5 |                     | 287 |
| 978841.1 | 839246.9 | [M+H]+ 31           | 86  |
| 79700.93 | 536003.7 |                     | 49  |
| 569562.3 | 6155811  |                     | 1   |
| 11222882 | 14188550 | [M+H+K]2+           | 29  |
| 5624599  | 3430104  | [914][M+1]+         | 23  |
| 734170.9 | 503504.3 | [1581][M+3]+        | 191 |
| 21043.68 | 18674.81 | [257][M+1]+         | 35  |
| 669211.8 | 3664902  |                     | 6   |
| 295155.8 | 415621.1 | [910][M+1]+         | 62  |
| 915516.4 | 1312352  | [1089][M]+          | 2   |
| 1469505  | 714464.7 | [1410][M]+          | 278 |
| 46090.62 | 135639.9 | [M+K]+ 34           | 94  |
| 67829.65 | 7210.958 |                     | 241 |
| 304011.9 | 197788.7 |                     | 19  |
| 217025.1 | 204812.6 |                     | 33  |
| 346734.2 | 269697.3 | [1089][M+2]+        | 2   |
| 1779822  | 5210550  |                     | 1   |
| 9022567  | 65018778 | [1501][M]+          | 210 |
| 551020.2 | 215085.9 | [1549][M+4]+        | 100 |
| 40599.31 | 249043.7 |                     | 220 |
| 102264.3 | 234718   |                     | 446 |
| 527729.5 | 205558.3 |                     | 216 |
| 0        | 1270139  |                     | 350 |
| 2888.037 | 104372.2 | [1491][M+1]3+       | 148 |
| 146622.3 | 51191.9  |                     | 310 |
| 4992467  | 256280.2 | [616][M+1]+         | 90  |
| 296082.1 | 189805.2 |                     | 34  |
| 548798.9 | 650674.1 | [M+Na+HC            | 95  |

|          |          |                      |     |
|----------|----------|----------------------|-----|
| 31617112 | 25690206 |                      | 201 |
| 705815.5 | 121469.4 | [2M+Na+K-            | 31  |
| 3001030  | 2885448  | [542][M]+            | 8   |
| 2595147  | 3044948  | [422][M+1]2+         | 29  |
| 188577.1 | 226951.9 |                      | 32  |
| 60983.27 | 86621.34 | [M+H]+ 32            | 119 |
| 1893660  | 4373991  |                      | 3   |
| 24919.31 | 120656.4 |                      | 94  |
| 988627.8 | 930884.3 | [1565][M+3]+         | 201 |
| 468448.8 | 412727   | [M+H-C3H2            | 14  |
| 2857550  | 3218007  |                      | 8   |
| 644744.3 | 123312.8 | [M+Na]+ 5            | 24  |
| 114798.7 | 782973.8 | [M+H]+ 42            | 173 |
| 171996.7 | 55988.15 |                      | 18  |
| 126810.3 | 119190.9 | [801][M+1]2+         | 252 |
| 414947   | 691247.2 | [M+K]+ 24            | 173 |
| 333877   | 474217.4 |                      | 359 |
| 275857.5 | 203429.8 | [414][M+1]+          | 15  |
| 491052   | 325759   | [1419][M]2+          | 249 |
| 164128.1 | 321453.7 |                      | 36  |
| 825716.3 | 1992472  | [M+H]+ 38            | 289 |
| 19617451 | 2184393  | [787][M]+            | 92  |
| 4156473  | 29731794 | [1501][M+1]+         | 210 |
| 151339.1 | 240889.4 |                      | 327 |
| 22188238 | 2641489  |                      | 76  |
| 1894256  | 3742880  | [1206][M]+           | 52  |
| 98495.33 | 176755.2 |                      | 218 |
| 5363420  | 34014345 | [1591][M]2+          | 1   |
| 403245.5 | 370565   | [3M+3Na+H            | 232 |
| 247773.8 | 307000   | [1582][M+3]+         | 202 |
| 18133131 | 11318929 | [902][M+2]+          | 25  |
| 256243.3 | 2893760  | [818][M]2+           | 11  |
| 1016228  | 1499595  | [M+H-H2O]            | 289 |
| 67830.74 | 11613.58 |                      | 108 |
| 487059.9 | 37574.57 | [M+Na]+ 5            | 31  |
| 2619475  | 822369.7 | [936][M]+ [M+H-CH4]  | 213 |
| 1200368  | 1184534  |                      | 221 |
| 510626.5 | 339580.2 | [M+2H]2+ !           | 23  |
| 2087158  | 3475472  | [882][M]+ [M+K+HCO   | 119 |
| 2367451  | 870054.2 | [654][M]+ [M+K+NH3   | 29  |
| 303414.3 | 752514.5 |                      | 133 |
| 356444.7 | 20892.42 | [1355][M+3]+         | 25  |
| 411713.5 | 99376.3  | [1277][M]+ [M+K+NaCl | 47  |
| 41831081 | 33707200 |                      | 211 |
| 0        | 91759.25 |                      | 147 |
| 1439898  | 2489186  | [M+H-C4H8            | 4   |
| 840331.8 | 289887.3 | [817][M+1]+          | 300 |

|          |          |                       |     |
|----------|----------|-----------------------|-----|
| 440286.1 | 383889.1 | [M+Na]+ 2:            | 196 |
| 785051.2 | 594071.2 | [212][M]+ [M+H]+ 29:  | 223 |
| 203460.2 | 223404.4 | [1089][M+1]+          | 2   |
| 1119317  | 816219.8 | [1070][M+1]3+         | 443 |
| 6243804  | 355896.8 | [M+K+NaCl             | 207 |
| 565611.2 | 233174.5 |                       | 1   |
| 0        | 253480.8 |                       | 311 |
| 355119.7 | 643193   | [822][M]2+ [M+2K]2+ : | 29  |
| 9113.486 | 38499.54 |                       | 238 |
| 154036.3 | 583013.8 | [409][M+1]+           | 104 |
| 147400.9 | 21892.39 | [1454][M+4]+          | 47  |
| 1478527  | 2042762  |                       | 29  |
| 1249433  | 990254.9 |                       | 354 |
| 189761.9 | 507877.3 |                       | 216 |
| 1306976  | 2139183  | [110][M]+ [M+H-CO]+   | 52  |
| 8451084  | 59225108 | [1591][M+1]2+         | 1   |
| 419427.1 | 511868.3 | [546][M+1]2+          | 29  |
| 116004.5 | 401179.1 | [M+K]+ 28:            | 26  |
| 116892.2 | 233316.7 |                       | 88  |
| 25924102 | 19065928 |                       | 211 |
| 344876.8 | 26276.48 |                       | 378 |
| 1946365  | 3346927  | [132][M]+ [M+H-C6H:   | 116 |
| 365363.8 | 0        | [M+H]+ 43:            | 180 |
| 51069.97 | 64126.25 |                       | 238 |
| 232935.7 | 30334.41 |                       | 25  |
| 183083.6 | 1512716  | [M+K]+ 43:            | 49  |
| 32886651 | 3622562  | [1011][M+1]+          | 33  |
| 13630801 | 12681823 | [1227][M]2+           | 191 |
| 344827.8 | 523354.5 | [M+2K]2+ :            | 29  |
| 332886   | 27015.15 |                       | 293 |
| 639268.4 | 505876.7 | [M+H-C4H:             | 23  |
| 313084.8 | 2597491  | [M+2K]2+ :            | 381 |
| 12195768 | 9590605  | [1513][M+1]+          | 270 |
| 232868.8 | 97979.66 | [1089][M+4]+          | 2   |
| 1199126  | 1768184  | [546][M]2+            | 29  |
| 322475.5 | 305712.6 |                       | 460 |
| 10101916 | 64325900 |                       | 6   |
| 697211.4 | 441330.4 |                       | 374 |
| 1314233  | 604938.3 |                       | 188 |
| 49543.78 | 68516.27 | [M+K]+ 40:            | 26  |
| 879876.7 | 1102093  | [M+2H]2+ :            | 29  |
| 2741634  | 2593612  | [1376][M]+ [M+Na]+ 6: | 11  |
| 479007.7 | 800879.8 |                       | 41  |
| 555593.4 | 502012.1 |                       | 26  |
| 163945   | 358805   |                       | 33  |
| 109139.6 | 98292.21 | [282][M+1]+           | 41  |
| 76207.31 | 2924523  | [797][M+2]+           | 55  |

|          |          |                                              |     |
|----------|----------|----------------------------------------------|-----|
| 268900.9 | 320078.6 |                                              | 360 |
| 2153531  | 0        | [M+H-CH <sub>2</sub> ]                       | 180 |
| 1314307  | 507334.1 | [947][M+1] <sup>+</sup>                      | 147 |
| 9229411  | 9571535  | [152][M] <sup>2+</sup> [M+2H-HC(             | 25  |
| 1270456  | 3652101  | [1233][M] <sup>2+</sup>                      | 4   |
| 250122.5 | 37219.07 | [824][M+2] <sup>+</sup>                      | 40  |
| 1896031  | 1427267  |                                              | 213 |
| 134032.8 | 36659.59 |                                              | 241 |
| 844585.4 | 689435.3 | [495][M] <sup>3+</sup> [2M+3H] <sup>3+</sup> | 245 |
| 621196.6 | 96509.78 | [1460][M] <sup>+</sup>                       | 106 |
| 811279.7 | 4275684  | [3M+2H] <sup>2+</sup>                        | 316 |
| 966911.9 | 906632.9 |                                              | 336 |
| 55766.18 | 75786.58 | [99][M+1] <sup>+</sup>                       | 55  |
| 641957.2 | 139740.6 |                                              | 300 |
| 387857.4 | 10329.62 |                                              | 206 |
| 472203.3 | 181164.7 |                                              | 61  |
| 402090.1 | 491681.2 | [M+2H-NH <sub>2</sub> ]                      | 119 |
| 3333685  | 3903516  |                                              | 29  |
| 606055.2 | 1023447  | [620][M] <sup>2+</sup> [M+Na+K] <sup>2</sup> | 29  |
| 15082108 | 18759610 | [565][M] <sup>+</sup>                        | 135 |
| 275231   | 618869.6 | [M+H-CO] <sup>+</sup>                        | 107 |
| 78253.58 | 675306.9 |                                              | 179 |
| 531737.3 | 485241.4 | [422][M+3] <sup>2+</sup>                     | 29  |
| 343853.7 | 111231.5 |                                              | 29  |
| 323445.6 | 2771026  |                                              | 51  |
| 3202849  | 3280049  | [876][M+1] <sup>+</sup>                      | 75  |
| 692610.8 | 506972.6 |                                              | 72  |
| 233063   | 312852.3 | [132][M+1] <sup>+</sup>                      | 116 |
| 34431888 | 75017798 | [44][M] <sup>+</sup>                         | 152 |
| 352903.3 | 363501.7 | [1335][M+4] <sup>+</sup>                     | 31  |
| 370773.3 | 747701.2 |                                              | 12  |
| 40858728 | 80783910 | [9][M] <sup>+</sup>                          | 152 |
| 2706406  | 2230522  | [1139][M+1] <sup>2+</sup>                    | 189 |
| 188155   | 126762.1 | [M+Na] <sup>+</sup> 4:                       | 33  |
| 66734036 | 47011929 |                                              | 189 |
| 1550374  | 1561083  |                                              | 189 |
| 0        | 0        |                                              | 148 |
| 2919314  | 3567886  | [565][M+1] <sup>+</sup>                      | 135 |
| 201450   | 36029.25 |                                              | 232 |
| 125504.5 | 59828.05 |                                              | 24  |
| 178277.9 | 349718   |                                              | 379 |
| 165169.5 | 278613.7 |                                              | 132 |
| 1566338  | 936670.8 | [1511][M+1] <sup>+</sup>                     | 11  |
| 872460.8 | 680718.8 | [1543][M+3] <sup>+</sup>                     | 257 |
| 73386.11 | 4876158  |                                              | 55  |
| 45810.62 | 423681.8 | [879][M+1] <sup>+</sup>                      | 116 |
| 1705905  | 568622.7 | [2M+Na+K]                                    | 40  |

|          |          |                       |     |
|----------|----------|-----------------------|-----|
| 4526906  | 490865.1 | [787][M+1]+           | 92  |
| 247579.7 | 128952.1 |                       | 418 |
| 6099758  | 511200.9 | [1196][M]+            | 177 |
| 1307894  | 1222035  |                       | 25  |
| 150586.8 | 331093.9 |                       | 292 |
| 48359.04 | 51325.09 | [710][M+1]+           | 324 |
| 1718611  | 688564.3 |                       | 142 |
| 637547.6 | 769350.2 |                       | 462 |
| 72475.16 | 289508.1 |                       | 104 |
| 1053519  | 14733251 |                       | 184 |
| 317151.8 | 154021.4 | [M+H-C2H4             | 23  |
| 1234430  | 1204737  | [M+H]+ 55!            | 245 |
| 1266181  | 751560.1 | [1331][M+2]+          | 24  |
| 326116.8 | 419086.7 | [3M+H]+ 2!            | 289 |
| 135514.9 | 434233.3 |                       | 409 |
| 2983704  | 2198976  | [1162][M]+ [M+Na]+ 5! | 100 |
| 117564.4 | 244151.9 | [M+H-C4H8             | 218 |
| 17627170 | 10648903 | [667][M]+             | 272 |
| 161336.6 | 25803.11 | [655][M+1]+           | 279 |
| 2847230  | 7085085  |                       | 322 |
| 4248800  | 2992410  | [711][M]+             | 286 |
| 555084.7 | 1431664  | [M+2K-H]+             | 228 |
| 207542.4 | 50953.43 | [2M+K]+ 3!            | 29  |
| 29436.41 | 37331.26 | [1491][M]3+           | 148 |
| 1384213  | 1328347  | [M+Na]+ 4!            | 100 |
| 20392456 | 25323340 | [263][M]+             | 29  |
| 3107780  | 4932878  | [68][M]2+ [M+2K]2+ 3! | 52  |
| 8831032  | 1240164  | [M+H-C2H4             | 86  |
| 17555.36 | 0        | [289][M+1]2+          | 47  |
| 224387.9 | 278430.8 |                       | 33  |
| 661744.5 | 2173686  |                       | 280 |
| 453845.5 | 1256242  | [M+Na]+ 4!            | 11  |
| 601103.4 | 2063749  | [M+2K-H]+             | 8   |
| 2892941  | 2419627  | [3M+2K]2+             | 206 |
| 16141.58 | 238470.6 | [M+H]+ 37!            | 103 |
| 8979234  | 2795243  | [754][M]+             | 62  |
| 2296318  | 2109172  | [540][M]2+ [M+2H-CO!  | 25  |
| 4285304  | 99369232 |                       | 129 |
| 697260.4 | 1557998  | [M+Na]+ 2!            | 17  |
| 306299.8 | 422468.5 | [M+H+CF3!             | 262 |
| 260775.4 | 48358.7  | [1460][M+1]+          | 106 |
| 663477.7 | 515644.5 |                       | 2   |
| 699405   | 252168.7 | [1275][M]+ [M+K+HCO   | 29  |
| 41694483 | 72108761 | [1313][M]+            | 1   |
| 120435.1 | 72264.66 | [541][M+1]3+          | 46  |
| 132616.2 | 7716.635 |                       | 320 |
| 108075.6 | 578690.1 |                       | 79  |

|          |          |                       |     |
|----------|----------|-----------------------|-----|
| 2157751  | 3379952  |                       | 289 |
| 119773.2 | 15543.28 |                       | 2   |
| 114372.3 | 641011.4 |                       | 78  |
| 9224124  | 6686530  | [1492][M+1]+          | 266 |
| 670222.2 | 1349482  |                       | 289 |
| 369674.2 | 61869.26 |                       | 25  |
| 309015.1 | 607901.3 |                       | 186 |
| 5391406  | 6953404  |                       | 366 |
| 580291.2 | 970780.6 | [68][M+1]2+           | 52  |
| 315244.3 | 195593.3 | [917][M+1]+           | 25  |
| 733847.7 | 5998894  | [M+2H]2+!             | 203 |
| 30538095 | 1.76E+08 | [1587][M+1]2+         | 6   |
| 20086922 | 96044979 |                       | 1   |
| 53855.79 | 1363451  | [M+K]+ 68!            | 31  |
| 55101.65 | 103499.3 |                       | 112 |
| 209301.1 | 181810.4 |                       | 289 |
| 6751084  | 14843397 | [M+K]+ 20!            | 192 |
| 956565.1 | 508152.2 |                       | 25  |
| 16142.53 | 9705.899 |                       | 241 |
| 23864.18 | 134053.6 |                       | 55  |
| 256316.6 | 336641.7 |                       | 135 |
| 1566614  | 249479.6 | [1238][M]+ [M+H+HCC   | 18  |
| 371937.8 | 573857.3 | [M+H]+ 40!            | 207 |
| 9942264  | 38333069 |                       | 6   |
| 7488059  | 4736210  | [3M+2Na]2             | 217 |
| 544741.3 | 492613   | [1365][M+1]+          | 283 |
| 68129.95 | 0        | [M+H+HCC              | 55  |
| 1836476  | 2805677  |                       | 350 |
| 119639.4 | 42378.51 |                       | 309 |
| 90532.92 | 30871.41 |                       | 217 |
| 27735.98 | 0        | [2M+Na+3I             | 18  |
| 201696.7 | 350619.7 |                       | 320 |
| 37830.84 | 21796.01 | [798][M+3]+           | 223 |
| 113456.8 | 59034.54 | [2M+K]+ 3!            | 29  |
| 604942.7 | 333249.8 | [1455][M+1]+          | 34  |
| 787468.1 | 17530524 |                       | 1   |
| 502415.8 | 91952.84 | [M+H]+ 69!            | 40  |
| 10294149 | 884318   | [510][M]+             | 73  |
| 371182.6 | 400112.3 | [M+H+NH3              | 55  |
| 1296751  | 116438.3 | [M+Na]+ 4!            | 207 |
| 147528.1 | 143374.8 | [626][M+1]+           | 387 |
| 274850.1 | 751061.6 |                       | 29  |
| 553359.2 | 1598707  |                       | 4   |
| 1289713  | 1544948  | [M+2H-CH4             | 17  |
| 145867.9 | 123224.9 | [743][M+1]+           | 52  |
| 11549.79 | 193983.6 |                       | 152 |
| 1557303  | 373725.9 | [1538][M]+ [M+K]+ 90! | 100 |

|          |          |                      |     |
|----------|----------|----------------------|-----|
| 981187.5 | 707230.5 | [1560][M+3]+         | 211 |
| 461430.2 | 473983.5 |                      | 202 |
| 696421.4 | 233564.2 | [M+H-H2O]            | 119 |
| 390230.4 | 102334   | [M+K+CF3C            | 29  |
| 80320983 | 13167730 | [1011][M]+ [M+H-C6H8 | 33  |
| 4289438  | 5261531  |                      | 11  |
| 480403.7 | 272385.1 |                      | 353 |
| 349295   | 137745.1 | [932][M+1]+          | 261 |
| 9584.492 | 19431.4  |                      | 91  |
| 27841.15 | 23771.17 |                      | 25  |
| 303600.1 | 433859.3 |                      | 283 |
| 1018198  | 692216.4 | [1286][M+1]+         | 56  |
| 134049.8 | 189018.3 | [700][M+1]+          | 62  |
| 494237.7 | 147038.2 | [M+3K-H]2            | 18  |
| 327241.2 | 255921.4 | [M+2H]2+ (           | 25  |
| 104603.9 | 211700.5 |                      | 368 |
| 228256.3 | 121870.9 | [M+Na]+ 6:           | 17  |
| 18391484 | 1.06E+08 | [1587][M]2+          | 6   |
| 305857.5 | 120746   |                      | 206 |
| 789493.7 | 112753.9 | [1238][M+2]+         | 18  |
| 305582.7 | 5822454  |                      | 10  |
| 4018324  | 5094369  | [12][M]+ [M+H]+ 19:  | 88  |
| 1137123  | 5469531  |                      | 38  |
| 741138.5 | 757323.1 |                      | 245 |
| 3009677  | 17360198 | [415][M+1]2+         | 1   |
| 82788.4  | 465355.7 | [M+Na]+ 4:           | 104 |
| 563152.1 | 473252.6 |                      | 35  |
| 8485812  | 47171743 |                      | 1   |
| 84288.06 | 18120.89 |                      | 442 |
| 18597.27 | 47142.31 | [3M+H+K]2            | 26  |
| 101444   | 84926.07 | [M+2H-HC(            | 76  |
| 217794.7 | 277197.1 | [1281][M+1]+         | 81  |
| 39258.74 | 308223.6 |                      | 61  |
| 249834.9 | 154551.9 |                      | 272 |
| 2143032  | 11031653 |                      | 1   |
| 26332698 | 21723985 | [M+Na]+ 6:           | 282 |
| 435835.9 | 4994070  |                      | 1   |
| 1236841  | 135141.2 |                      | 92  |
| 1015881  | 768335.9 | [1414][M+1]2+        | 12  |
| 1501277  | 112894.7 | [1196][M+1]+         | 177 |
| 308714.2 | 141149.4 | [740][M+1]+          | 223 |
| 14713.63 | 0        | [M+H-CH2]            | 47  |
| 64624    | 173821.9 |                      | 147 |
| 75137.47 | 52430.18 | [M+K]+ 46:           | 391 |
| 172639   | 280976.6 | [1358][M+1]+         | 186 |
| 202530.6 | 141726   | [165][M+3]+          | 199 |
| 193432.2 | 71787.75 | [M+H]+ 28:           | 188 |

|          |          |                     |     |
|----------|----------|---------------------|-----|
| 448670.2 | 220874.5 |                     | 34  |
| 53380.46 | 1453140  | [M+K+NaCl           | 55  |
| 5909700  | 725859.5 | [966][M]+           | 170 |
| 423577   | 423193.4 |                     | 176 |
| 677057.2 | 570040.3 |                     | 216 |
| 25662.17 | 949266   |                     | 152 |
| 75447.54 | 62356.43 | [1267][M+1]+        | 100 |
| 153229.3 | 21590.6  |                     | 29  |
| 102780.3 | 170907.2 | [M+H-C2H4           | 60  |
| 747200.4 | 761851.8 |                     | 155 |
| 2422512  | 2636732  | [199][M+1]+         | 144 |
| 56631.26 | 155557.9 |                     | 211 |
| 559850.2 | 367503.3 |                     | 174 |
| 19128479 | 3750715  |                     | 58  |
| 443444.4 | 479839.3 | [M+Na]+ 5:          | 289 |
| 15095404 | 56366386 |                     | 1   |
| 415387.8 | 49841.98 | [M+K+HCO            | 18  |
| 1154343  | 978239.8 | [1018][M+1]3+       | 206 |
| 1894722  | 134974.4 | [510][M+1]+         | 73  |
| 1481965  | 1403859  | [M+H]+ 27:          | 193 |
| 1264377  | 869343.2 | [1083][M]+          | 312 |
| 3111576  | 2233078  |                     | 68  |
| 36474.29 | 710146.6 | [M+H-CO2]           | 18  |
| 103281.3 | 463322.6 |                     | 17  |
| 339564.8 | 355919.6 |                     | 194 |
| 1522288  | 18867416 |                     | 184 |
| 21712958 | 23243959 | [1007][M]+ [M+H+NH3 | 75  |
| 1150926  | 1014327  | [1376][M+1]+        | 11  |
| 95974.52 | 119897.6 |                     | 18  |
| 3071584  | 847183.2 |                     | 37  |
| 501135.2 | 455550.1 |                     | 12  |
| 729726.3 | 261591.7 | [M+K]+ 44:          | 229 |
| 153675.3 | 168375.5 |                     | 26  |
| 798607.8 | 974276.4 | [M+Na]+ 2:          | 29  |
| 949597.4 | 499905.5 | [M+Na]+ 3:          | 134 |
| 2402786  | 253536.1 | [M+Na]+ 5:          | 86  |
| 1806420  | 2158031  | [181][M+3]+         | 29  |
| 118454.6 | 3361026  |                     | 55  |
| 114014.7 | 227261.3 | [775][M+1]+         | 268 |
| 131874.2 | 67566.94 |                     | 104 |
| 4265499  | 427853.9 | [1059][M]+          | 197 |
| 6134510  | 17201536 |                     | 1   |
| 12520350 | 57345138 |                     | 6   |
| 141477.5 | 8001.41  | [1275][M+1]+        | 29  |
| 702048.8 | 180513.4 | [M+H]+ 59:          | 25  |
| 468159.3 | 450114.5 | [363][M+3]2+        | 18  |
| 313636.3 | 798432   |                     | 14  |



|          |          |              |     |
|----------|----------|--------------|-----|
| 0        | 674759.4 | [M+H-NH3]    | 180 |
| 312467.1 | 253387.2 |              | 337 |
| 1009127  | 133269.2 | [824][M+1]+  | 40  |
| 72969395 | 1.23E+08 | [731][M]+    | 11  |
| 67057711 | 213515.8 |              | 52  |
| 432938.2 | 481192.7 |              | 254 |
| 526987.5 | 986330.9 |              | 167 |
| 0        | 15302.43 | [M+H]+ 90    | 18  |
| 6178620  | 7715479  | [228][M]+    | 25  |
| 28799.75 | 129745.6 | [M+Na]+ 5    | 229 |
| 5587473  | 843864.4 |              | 91  |
| 136839.5 | 36605.91 | [1149][M+1]+ | 18  |
| 0        | 1023298  |              | 394 |
| 63414.63 | 170362.5 |              | 385 |
| 978447.5 | 1284928  |              | 105 |
| 1583585  | 1881173  | [910][M]+    | 62  |
| 2836208  | 1257206  | [1530][M+2]+ | 100 |
| 4916.58  | 4154.575 |              | 148 |
| 110320.1 | 232012.6 | [605][M+1]2+ | 139 |
| 118883.7 | 91658.99 | [M+H]+ 54    | 289 |
| 20353018 | 1.54E+08 |              | 1   |
| 262424.9 | 387885.4 | [M+3K-H]2    | 29  |
| 250519.2 | 333759.9 |              | 2   |
| 326651.3 | 769141   |              | 49  |
| 155863.5 | 10071.06 |              | 33  |
| 105861.6 | 223664   | [476][M+1]+  | 89  |
| 746691.4 | 526274.6 | [939][M+1]+  | 26  |
| 54980.97 | 9493.454 |              | 170 |
| 243182.7 | 1828851  | [M+H]+ 55    | 31  |
| 310471.3 | 120600.1 |              | 357 |
| 1034247  | 1182611  |              | 353 |
| 771452.7 | 6980483  | [1501][M+2]+ | 210 |
| 433896.1 | 137860.6 | [M+Na]+ 4    | 52  |
| 40520.69 | 93861.43 | [M+Na+HC     | 116 |
| 65743.96 | 591882.5 |              | 472 |
| 1198249  | 700694   | [333][M+1]+  | 49  |
| 1379723  | 941411.6 |              | 15  |
| 1353439  | 192370.7 |              | 300 |
| 1205500  | 137494.6 | [1059][M+1]+ | 197 |
| 1550852  | 1404315  | [M+K]+ 32    | 272 |
| 276873   | 131026.2 | [825][M+1]+  | 75  |
| 11368764 | 20571032 | [955][M]+    | 52  |
| 401183.6 | 465330.5 | [786][M+1]2+ | 29  |
| 11727210 | 10945204 |              | 219 |
| 21168.59 | 195543   | [736][M+2]+  | 55  |
| 235126.1 | 412417   | [929][M+1]+  | 160 |
| 45021.86 | 27012.83 |              | 46  |

|          |          |                                               |     |
|----------|----------|-----------------------------------------------|-----|
| 5207966  | 11842048 | [M+Na+CF <sub>3</sub> ]                       | 180 |
| 143674.5 | 98628.84 |                                               | 77  |
| 1113095  | 1015173  |                                               | 256 |
| 297847.7 | 1861554  |                                               | 20  |
| 2786647  | 917052.4 |                                               | 191 |
| 99710.07 | 379109.1 |                                               | 228 |
| 565703   | 445567.5 | [798][M+2] <sup>+</sup>                       | 223 |
| 606295   | 318116.1 | [M+Na+HC]                                     | 31  |
| 528204.4 | 846450.1 | [M+K+HCO <sub>2</sub> ]                       | 79  |
| 167382.1 | 580699.2 |                                               | 374 |
| 65727.9  | 24791.12 | [2M+2K-H]                                     | 104 |
| 2.36E+09 | 4.53E+09 | [1316][M+2] <sup>+</sup>                      | 1   |
| 76712.14 | 38119.49 | [1411][M+1] <sup>+</sup>                      | 34  |
| 16745311 | 34687441 | [639][M] <sup>+</sup> [M+K] <sup>+</sup> 37%  | 119 |
| 45198.77 | 44900.88 |                                               | 39  |
| 22233.04 | 31145.74 |                                               | 198 |
| 1488764  | 230161.7 | [686][M] <sup>+</sup> [M+Na+CF <sub>3</sub> ] | 116 |
| 9821872  | 11754572 |                                               | 14  |
| 393432.2 | 258313.8 | [2M+H+K] <sub>2</sub>                         | 100 |
| 694992.1 | 799158.2 |                                               | 265 |
| 103046.5 | 58708.95 | [325][M+1] <sup>+</sup>                       | 382 |
| 414464.8 | 1634847  |                                               | 128 |
| 410611.2 | 30056.04 |                                               | 293 |
| 178722.9 | 113579.3 |                                               | 114 |
| 260076.3 | 64334.32 |                                               | 103 |
| 962798.6 | 8448716  | [M+2H] <sub>2</sub> <sup>+</sup>              | 206 |
| 428616.8 | 538538.8 | [181][M+2] <sup>+</sup>                       | 29  |
| 32479727 | 21899242 | [1531][M] <sup>+</sup>                        | 256 |
| 67151.7  | 14596.93 |                                               | 138 |
| 957315.9 | 432071.8 |                                               | 15  |
| 235585.4 | 340496.8 | [659][M+1] <sup>+</sup>                       | 41  |
| 484936.9 | 190866.9 | [654][M+1] <sup>+</sup>                       | 29  |
| 3859186  | 404885.2 | [1011][M+2] <sup>+</sup>                      | 33  |
| 1288008  | 1642349  | [1210][M+1] <sup>+</sup>                      | 136 |
| 1000511  | 1048172  | [M+K+NH <sub>3</sub> ]                        | 26  |
| 479338.9 | 19099.21 | [1226][M+1] <sup>+</sup>                      | 104 |
| 199974.8 | 136110.3 |                                               | 272 |
| 441906   | 318672.9 | [1461][M] <sup>+</sup>                        | 202 |
| 407328.6 | 671209   | [297][M+1] <sup>+</sup>                       | 158 |
| 432674.1 | 157778.1 |                                               | 29  |
| 1597567  | 0        | [2M+2Na+I]                                    | 180 |
| 988852.7 | 931335.9 | [403][M+3] <sup>+</sup>                       | 15  |
| 617658.5 | 918668.9 | [3M+2K] <sub>2</sub> <sup>+</sup>             | 88  |
| 250976.5 | 116601.3 |                                               | 237 |
| 385332.9 | 199366.1 | [1193][M+2] <sup>+</sup>                      | 100 |
| 357434.1 | 197303.4 | [1577][M+2] <sup>+</sup>                      | 100 |
| 121835.6 | 33686.3  | [M+Na+HC]                                     | 119 |

|          |          |                      |     |
|----------|----------|----------------------|-----|
| 259737.5 | 315806.7 | [2M+Na+K]            | 14  |
| 17010.87 | 838376.3 | [M+K]+ 39            | 18  |
| 825338.6 | 800411.6 | [953][M+1]2+         | 260 |
| 1787882  | 780738   |                      | 18  |
| 2405898  | 3605898  |                      | 17  |
| 340129.7 | 12768593 | [M+2Na-H]            | 14  |
| 158887.5 | 30714.06 | [M+H+HCC]            | 33  |
| 555528.9 | 164246.3 |                      | 89  |
| 7969317  | 19430758 |                      | 1   |
| 845459.3 | 585852.6 | [359][M+1]+          | 217 |
| 1329365  | 2275868  | [409][M]+ [M+Na]+ 3  | 104 |
| 111119   | 326870.3 | [547][M+3]+          | 55  |
| 63355220 | 3.49E+08 |                      | 1   |
| 58487.41 | 223231.3 |                      | 378 |
| 330336.4 | 173766.9 | [1336][M+1]+         | 24  |
| 1639221  | 91668.73 | [966][M+1]+          | 170 |
| 354266.5 | 680452.3 | [505][M+1]+          | 41  |
| 15133023 | 13324289 | [1408][M]+           | 29  |
| 29440.98 | 391614.9 |                      | 181 |
| 643959.9 | 167379   | [2M+2Na+H]           | 31  |
| 85904.88 | 150361.3 | [M+K+NaCl]           | 86  |
| 11515.86 | 566036.5 |                      | 390 |
| 5239153  | 3900783  | [1377][M]+ [M+Na]+ 6 | 29  |
| 603939.1 | 423908.3 | [M+Na]+ 8            | 29  |
| 11302071 | 9136161  | [3M+2H]2+            | 333 |
| 53259.98 | 339294.4 |                      | 431 |
| 506929.3 | 377867.7 |                      | 115 |
| 1607345  | 378576.1 |                      | 44  |
| 90829.49 | 278875.6 |                      | 69  |
| 911778   | 600707.2 |                      | 231 |
| 1945583  | 2070950  | [152][M+1]2+         | 25  |
| 699474.9 | 4834224  | [1198][M]+           | 1   |
| 3248238  | 265024.8 | [2M+Na+3I]           | 229 |
| 16490.21 | 43879.79 |                      | 39  |
| 1333197  | 2026767  |                      | 188 |
| 251261.5 | 520763.9 | [M+Na+NH]            | 104 |
| 189515.4 | 37667.3  |                      | 116 |
| 1213411  | 123996.5 | [1226][M]+ [M+Na]+ 6 | 104 |
| 195981   | 44821.33 |                      | 33  |
| 350232.2 | 26278.7  | [686][M+1]+          | 116 |
| 203974.1 | 1079755  | [M+H+HCC]            | 49  |
| 837234.4 | 858631.2 |                      | 175 |
| 254373.4 | 540283   |                      | 124 |
| 475414.8 | 47773.46 |                      | 221 |
| 792411.9 | 399763   |                      | 24  |
| 37498541 | 71980936 | [1325][M]+           | 1   |
| 714790   | 515045.3 | [2M+Na+K]            | 16  |

|          |          |                      |     |
|----------|----------|----------------------|-----|
| 33109667 | 31074657 | [1217][M]+ [M+K+NH3  | 75  |
| 377240.5 | 25016.62 | [1238][M+1]+         | 18  |
| 3661378  | 4085543  | [167][M]2+           | 175 |
| 450671.7 | 4460851  | [1465][M+2]+         | 223 |
| 1459786  | 687471.5 |                      | 13  |
| 697274.7 | 804591.6 | [167][M+1]2+         | 175 |
| 245006.7 | 192178.5 | [M+K]+ 496           | 281 |
| 8829079  | 67429642 | [1525][M]+ [M+H]+ 90 | 203 |
| 94604.4  | 830951   | [M+H-CO]+            | 88  |
| 1076702  | 1358352  |                      | 17  |
| 222701.5 | 480512.1 | [2M+2K-H]            | 289 |
| 182699   | 51131.69 | [263][M+4]+          | 29  |
| 5294810  | 8894348  |                      | 17  |
| 1887863  | 234380.3 | [M+K]+ 39            | 218 |
| 328002.9 | 509310.3 | [638][M+1]+          | 52  |
| 65432.11 | 3081.424 |                      | 148 |
| 9241676  | 21727862 | [114][M]+            | 255 |
| 28301495 | 1.31E+08 |                      | 1   |
| 28261160 | 21404010 | [3M+Na+2I            | 251 |
| 449137.8 | 442304.9 |                      | 20  |
| 625291   | 778070.8 |                      | 195 |
| 999018.8 | 198766.4 |                      | 14  |
| 4159084  | 33354357 | [1525][M+1]+         | 203 |
| 34585459 | 57359990 | [1292][M+2]+         | 1   |
| 174052   | 86825.23 |                      | 66  |
| 1.21E+08 | 9.41E+08 |                      | 1   |
| 128500.8 | 144312.5 | [M+Na]+ 2            | 49  |
| 860164.9 | 789614.2 | [1553][M+3]+         | 260 |
| 1285806  | 1105804  | [915][M]+            | 229 |
| 784136.9 | 686939.9 |                      | 206 |
| 1.08E+10 | 2.04E+10 | [1316][M+1]+         | 1   |
| 486695.9 | 343839.4 | [2M+Na]+ :           | 24  |
| 184740.4 | 451291.6 |                      | 27  |
| 1568897  | 1163511  | [1407][M]+           | 29  |
| 67756.91 | 7251.987 | [1454][M+1]+         | 47  |
| 896365.3 | 6561360  | [3M+H+Na             | 11  |
| 3448516  | 789461.2 | [722][M]+            | 58  |
| 49678.18 | 111935.1 |                      | 211 |
| 4038514  | 20013316 | [1535][M+1]2+        | 7   |
| 1.18E+08 | 7.44E+08 |                      | 1   |
| 1215951  | 2255409  | [282][M]+            | 41  |
| 54384.22 | 8228.192 | [M+Na+HC             | 18  |
| 1159292  | 1729010  |                      | 29  |
| 61744.94 | 406423.8 |                      | 184 |
| 1.03E+08 | 6.8E+08  |                      | 1   |
| 803688.3 | 5811986  | [793][M+1]2+         | 203 |
| 1324979  | 1282002  |                      | 115 |

|          |          |                      |     |
|----------|----------|----------------------|-----|
| 2.16E+08 | 5.87E+08 | [1316][M+3]+         | 1   |
| 591535.3 | 1129346  |                      | 28  |
| 786692.8 | 1007088  | [M+K+NH3             | 153 |
| 239559.8 | 7752496  |                      | 54  |
| 6413116  | 7482846  |                      | 29  |
| 3619471  | 2617410  |                      | 338 |
| 159910.9 | 643632.1 |                      | 12  |
| 74208.14 | 153856.5 | [M+K]+ 29            | 14  |
| 543332.4 | 274479.7 | [912][M+2]+          | 212 |
| 369027.6 | 2930288  |                      | 135 |
| 59034.15 | 15720.23 | [873][M+1]+          | 360 |
| 152407.9 | 6775.468 |                      | 301 |
| 864661.5 | 761743.3 | [489][M]+            | 105 |
| 5226121  | 25261008 |                      | 1   |
| 1035031  | 1027277  | [M+H+NH3             | 375 |
| 53260.29 | 66230.89 |                      | 211 |
| 119369.2 | 19273.18 |                      | 303 |
| 1387383  | 847769.3 | [M+K+HCO             | 23  |
| 1198230  | 1313004  |                      | 244 |
| 2416278  | 4424769  | [955][M+1]+          | 52  |
| 1156350  | 683716.3 |                      | 217 |
| 393376.4 | 62579.09 |                      | 398 |
| 128251.9 | 55407489 | [156][M]+ [M+H]+ 27  | 155 |
| 542443.4 | 361158.5 |                      | 153 |
| 7376225  | 620895.8 |                      | 113 |
| 619583.8 | 63272.37 |                      | 386 |
| 2.63E+10 | 4.89E+10 | [1316][M]+           | 1   |
| 1348230  | 18861821 |                      | 271 |
| 785676.8 | 854456.6 |                      | 188 |
| 796360.5 | 0        |                      | 180 |
| 827687.4 | 1487536  | [M+H-COCl            | 11  |
| 29502903 | 26278301 | [1368][M]+ [M+K+NH3  | 205 |
| 285902.1 | 742365.3 |                      | 19  |
| 98633.96 | 35747.41 | [M+K]+ 42            | 281 |
| 156685.1 | 129611.2 |                      | 108 |
| 143803.2 | 32133.42 |                      | 62  |
| 975924.1 | 1040213  | [M+2K]2+ 6           | 29  |
| 2448893  | 1609414  | [914][M+2]+          | 23  |
| 922634.1 | 733006   | [1444][M+1]2+        | 71  |
| 119316.7 | 63552.3  | [42][M+1]+           | 254 |
| 1691546  | 1784363  | [848][M]+ [M+H+NH3   | 223 |
| 2671485  | 3084436  | [1273][M]2+          | 11  |
| 284145.2 | 201758.5 | [831][M]+            | 11  |
| 352666.1 | 1816412  |                      | 269 |
| 4276872  | 808904.7 | [824][M]+ [M+K+NH3   | 40  |
| 728486.9 | 559036.7 | [1531][M+3]+         | 256 |
| 850415   | 352886.7 | [1149][M]+ [M+H]+ 58 | 18  |

|          |          |                     |     |
|----------|----------|---------------------|-----|
| 3197435  | 2566613  |                     | 92  |
| 56433.76 | 292553   |                     | 404 |
| 826940.9 | 695222.8 | [743][M]+ [M+K]+ 40 | 52  |
| 7739649  | 3936209  | [1379][M+1]+        | 18  |
| 712294.5 | 1885869  | [114][M+2]+         | 255 |
| 230867.7 | 1500921  | [M+K+HCO            | 49  |
| 290292.1 | 100181.7 |                     | 334 |
| 577020.7 | 781782.2 | [M+K]+ 41           | 96  |
| 19752.87 | 92415.79 | [644][M+1]+         | 86  |
| 226413.3 | 216383.3 | [M+H+NH3            | 237 |
| 2650037  | 14831897 |                     | 7   |
| 38282.81 | 339385.6 | [M+K+HCO            | 49  |
| 124866.5 | 62777.03 |                     | 250 |
| 186646.3 | 316199.8 |                     | 52  |
| 191336.1 | 158805.3 | [1073][M+1]2+       | 442 |
| 357076.4 | 32806117 |                     | 104 |
| 2947377  | 2175469  |                     | 219 |
| 209126.3 | 420394.2 |                     | 297 |
| 14458.8  | 0        | [M+K+NaC            | 47  |
| 4094588  | 2761759  | [939][M]+           | 26  |
| 228498.5 | 174387.2 |                     | 455 |
| 1718977  | 2454961  | [638][M]+ [M+Na]+ 3 | 52  |
| 829547.2 | 261867.9 | [M+K]+ 67           | 23  |
| 653097   | 172721.8 |                     | 40  |
| 3777810  | 3509690  | [M+2H-HC            | 25  |
| 247474   | 20762.57 | [1454][M+2]+        | 47  |
| 406389.5 | 512887.8 |                     | 328 |
| 78977.11 | 59257.01 |                     | 152 |
| 832723.8 | 3019827  | [1233][M+1]2+       | 4   |
| 695900.5 | 515049.3 | [1490][M+1]2+       | 317 |
| 113370.5 | 19734.79 |                     | 229 |
| 434260.1 | 127163.3 | [3M+2Na]2           | 218 |
| 94539.36 | 66226.38 |                     | 313 |
| 1808272  | 1245321  |                     | 71  |
| 427282.1 | 516371.1 |                     | 114 |
| 7324793  | 10147990 |                     | 77  |
| 634443.5 | 540847.5 |                     | 114 |
| 5366678  | 3078250  | [M+K+CF3            | 75  |
| 366747.2 | 279328   | [710][M]+           | 324 |
| 88254.27 | 30111.36 |                     | 29  |
| 3233389  | 0        | [M+Na+HC            | 180 |
| 383797.3 | 9140717  |                     | 31  |
| 7978981  | 7930586  |                     | 53  |
| 226967.5 | 405668.8 | [M+Na+CF            | 217 |
| 228855.6 | 2566790  | [M+K]+ 37           | 55  |
| 303907.2 | 59029.1  |                     | 364 |
| 100325.6 | 39714.1  | [541][M]3+          | 46  |

|          |          |                       |     |
|----------|----------|-----------------------|-----|
| 32490523 | 1.46E+08 | [1350][M+4]+          | 1   |
| 27910.65 | 41178.7  |                       | 49  |
| 472746.8 | 58237.34 |                       | 116 |
| 28184240 | 12791933 | [1379][M]+ [M+H+HCC   | 18  |
| 776391   | 766655   |                       | 114 |
| 2582406  | 622850.2 | [962][M+1]+           | 11  |
| 354713.6 | 1145792  |                       | 228 |
| 31114.02 | 2046241  | [M+K+HCO              | 199 |
| 131262.1 | 140416   |                       | 148 |
| 289991.7 | 563585.1 |                       | 29  |
| 482637.5 | 312264.4 | [431][M+1]+           | 230 |
| 1548098  | 3152366  | [M+H+HCC              | 119 |
| 562407.7 | 298808.3 |                       | 12  |
| 552902.6 | 1183968  | [M+K]+ 40!            | 119 |
| 212770   | 513775.7 |                       | 195 |
| 2801052  | 6596529  |                       | 9   |
| 422763   | 1674669  |                       | 69  |
| 157741.3 | 262432.8 | [169][M+2]+           | 107 |
| 2890643  | 2631059  |                       | 388 |
| 4616145  | 502114.5 | [988][M]+             | 43  |
| 1428574  | 1340191  | [888][M]+             | 25  |
| 1914045  | 615061.4 | [468][M]+ [M+K]+ 32!  | 215 |
| 1753355  | 2860886  | [1282][M]+ [M+Na]+ 6! | 289 |
| 4603196  | 5596334  |                       | 114 |
| 112012.4 | 126498.4 | [309][M+1]+           | 165 |
| 2616970  | 149819.6 |                       | 224 |
| 48702509 | 61023893 | [1317][M]+            | 63  |
| 168334.2 | 579010.2 | [M+Na+CF:             | 218 |
| 8611.63  | 44378.72 | [2M+Na+K]             | 49  |
| 104397.7 | 34201.17 |                       | 46  |
| 10542271 | 10415456 | [1368][M+1]+          | 205 |
| 2202253  | 1831933  | [1082][M+1]2+         | 201 |
| 548823.1 | 186905.4 | [M+K+NaCl             | 23  |
| 1544548  | 2431256  | [725][M+1]3+          | 105 |
| 495849.3 | 783647.2 |                       | 52  |
| 427924.6 | 527429.1 | [1421][M+2]+          | 149 |
| 2230646  | 2314056  | [453][M+3]2+          | 1   |
| 208171.1 | 1176259  | [M+H-CO2]             | 104 |
| 1683704  | 1520051  |                       | 231 |
| 163429   | 295527.3 | [M+H]+ 43!            | 52  |
| 1413645  | 1325960  | [917][M]+             | 25  |
| 729802.3 | 126736.3 | [842][M]+             | 113 |
| 596682.5 | 0        | [1010][M+1]+          | 264 |
| 243747.5 | 1917471  | [M+H]+ 34!            | 60  |
| 1724846  | 1838084  |                       | 214 |
| 351306.5 | 215314.6 | [M+Na+HC              | 40  |
| 10441287 | 8182134  |                       | 11  |

|          |          |                       |     |
|----------|----------|-----------------------|-----|
| 475875.7 | 1.47E+08 |                       | 28  |
| 6152468  | 6964181  | [159][M+2]+           | 17  |
| 256052.6 | 32329.27 |                       | 92  |
| 2842333  | 294906.9 | [297][M]+ [M+H+NH3    | 158 |
| 1560947  | 735423.1 | [1508][M]+ [M+K+NaCl  | 29  |
| 183700   | 16375.63 | [M+H]+ 58:            | 33  |
| 3154649  | 3158753  | [798][M]+ [M+H]+ 46:  | 223 |
| 1802007  | 1901248  |                       | 134 |
| 112296.8 | 160215.3 |                       | 318 |
| 4925835  | 2762018  | [311][M]+             | 300 |
| 1104005  | 1245627  | [M+H+CF3O             | 4   |
| 10860.22 | 18438.44 |                       | 241 |
| 6106954  | 9497974  | [586][M]2+            | 85  |
| 1590148  | 13370018 | [793][M]2+            | 203 |
| 132843.4 | 170005   |                       | 119 |
| 254374.9 | 127869.9 |                       | 293 |
| 767706.9 | 777972.3 | [1432][M+1]2+         | 249 |
| 7667560  | 8276316  | [M+2K]2+ :            | 75  |
| 578998.1 | 126793.5 | [1149][M+2]+          | 18  |
| 201310.5 | 91428.91 | [3M+2Na]2             | 217 |
| 9229431  | 8011286  |                       | 257 |
| 993321.5 | 1276406  |                       | 10  |
| 676688.5 | 689373.7 | [1449][M]+            | 443 |
| 18912.14 | 671584.7 |                       | 173 |
| 14795.77 | 0        |                       | 148 |
| 1422835  | 731870.7 | [M+H-CH2]             | 18  |
| 612858.5 | 163495.3 | [M+K+HCO              | 40  |
| 213501   | 1239308  |                       | 61  |
| 658567.4 | 62591.93 |                       | 355 |
| 159561   | 658543.1 |                       | 204 |
| 600789.1 | 274168.1 | [M+K]+ 32(            | 40  |
| 25302423 | 28694554 | [979][M]+             | 190 |
| 681459.5 | 1535383  | [M+K]+ 15(            | 255 |
| 1392598  | 1154893  | [707][M]2+ [M+2K]2+ : | 25  |
| 1292898  | 1695410  |                       | 117 |
| 352485.4 | 4697640  | [M+Na]+ 3:            | 199 |
| 229582.8 | 677374.5 | [M+H]+ 31:            | 176 |
| 952635.7 | 996762.7 | [2M+Na]+ :            | 15  |
| 1.23E+08 | 89288247 | [902][M+1]+           | 25  |
| 200702.7 | 61777.51 |                       | 44  |
| 12387.01 | 547352.8 | [171][M+3]+           | 199 |
| 28263.52 | 41756.92 | [2M+Na+K]             | 116 |
| 1592067  | 1696106  |                       | 5   |
| 486021.6 | 38547.54 | [M+H-CO]+             | 229 |
| 518182.6 | 614103.3 | [M+H]+ 39:            | 289 |
| 278642.2 | 100125.2 |                       | 61  |
| 234005.3 | 242719.2 |                       | 17  |



|          |          |                      |     |
|----------|----------|----------------------|-----|
| 548623.7 | 502989.6 | [M+2H]2+             | 132 |
| 397974   | 35380.42 |                      | 309 |
| 161318.1 | 1861149  |                      | 40  |
| 131230.6 | 225569.7 | [2M+Na+2I            | 52  |
| 46273594 | 1.48E+08 | [1350][M+5]2+        | 1   |
| 251213.1 | 46190.22 |                      | 231 |
| 1435264  | 449751.6 |                      | 269 |
| 6577335  | 13978124 | [771][M]+ [M+Na]+ 4: | 119 |
| 645672.4 | 735367.4 | [509][M+1]+          | 257 |
| 765432.3 | 632472.3 | [M+Na]+ 3:           | 221 |
| 442146.7 | 298548.3 | [M+Na+NH             | 96  |
| 1818620  | 2073787  | [3M+H+K]2            | 24  |
| 649936.2 | 86088.99 | [M+H]+ 53:           | 218 |
| 133250.2 | 11402.13 |                      | 138 |
| 1307305  | 11212395 | [881][M+1]2+         | 206 |
| 1202233  | 1477065  |                      | 115 |
| 348183.5 | 650246.3 | [M+Na+K+I            | 119 |
| 372169.3 | 687930.4 | [1282][M+1]+         | 289 |
| 46662.62 | 88674.19 | [M+K+NaCl            | 282 |
| 1176298  | 5666290  | [M+K]+ 28:           | 11  |
| 383957   | 42867.4  |                      | 238 |
| 340129   | 2868041  |                      | 152 |
| 2119259  | 1986218  |                      | 1   |
| 4127860  | 23042654 |                      | 88  |
| 1283167  | 211833.6 | [408][M]+            | 77  |
| 1809739  | 13448097 |                      | 54  |
| 2810144  | 1632104  | [M+K+NH3             | 11  |
| 41574729 | 44256560 | [186][M]+            | 18  |
| 2741304  | 29379614 | [1535][M]2+          | 7   |
| 70064.56 | 165059.8 | [M+K]+ 34:           | 103 |
| 1206091  | 0        |                      | 311 |
| 863386.1 | 3717001  | [M+2H-C2I            | 172 |
| 16605802 | 2770911  |                      | 44  |
| 5579558  | 7330863  | [1421][M]+           | 149 |
| 2659948  | 21455283 | [881][M]2+           | 206 |
| 1524964  | 1057964  | [1018][M]3+          | 206 |
| 3.72E+08 | 5.26E+08 |                      | 5   |
| 72600.29 | 15118.03 | [M+2H-CH:            | 18  |
| 4327508  | 2522878  | [667][M+1]+          | 272 |
| 1105174  | 1416541  | [525][M+1]2+         | 258 |
| 1818542  | 1332171  |                      | 21  |
| 1241090  | 1393036  | [3M+Na+K]            | 244 |
| 386649.6 | 742911.7 |                      | 2   |
| 283188.9 | 108982.7 | [M+H-C6H:            | 119 |
| 167389.3 | 122155.3 |                      | 23  |
| 175880.5 | 82729.92 |                      | 104 |
| 160258.5 | 165646.7 |                      | 376 |

|          |          |              |     |
|----------|----------|--------------|-----|
| 405295   | 819908.5 | [402][M+1]+  | 105 |
| 15557700 | 1597585  |              | 53  |
| 127710   | 173884.6 |              | 228 |
| 15769821 | 59670969 |              | 1   |
| 1014895  | 584831.2 | [M+H-CO]+    | 18  |
| 19490702 | 2215528  | [303][M]+    | 51  |
| 2201438  | 2561025  |              | 317 |
| 604950.3 | 623028.4 | [345][M+1]+  | 80  |
| 5186582  | 455957.1 |              | 135 |
| 123457.9 | 17052.18 | [1434][M+1]+ | 33  |
| 458609.4 | 335067.8 |              | 467 |
| 438380.9 | 668674.4 |              | 107 |
| 0        | 0        |              | 148 |
| 5523885  | 14851745 | [1592][M]2+  | 6   |
| 192256   | 266402.1 |              | 204 |
| 545872   | 545462.9 | [M+Na+K+]    | 116 |
| 3687613  | 5148433  | [1210][M]+   | 136 |
| 5934552  | 11622111 | [M+K]+ 53:   | 223 |
| 1109779  | 1498609  | [M+H]+ 48:   | 8   |
| 270052.6 | 191938.6 | [915][M+1]+  | 229 |
| 487051.2 | 778285.6 | [M+H+NH3     | 34  |
| 195073.2 | 33727.07 | [1147][M+3]+ | 29  |
| 277863.4 | 746975.9 |              | 54  |
| 1901110  | 2270904  | [188][M]2+   | 151 |
| 282397.4 | 103871.3 | [965][M+1]+  | 33  |
| 1676987  | 1200782  | [783][M+1]2+ | 66  |
| 49116.62 | 10664.49 | [M+K+NaCl    | 18  |
| 147790.5 | 82120.03 | [839][M+1]+  | 207 |
| 248971.4 | 5353635  | [M+H-H2O]    | 40  |
| 1001315  | 93883.9  |              | 293 |
| 2709536  | 1098429  | [M+K+NaCl    | 18  |
| 38783440 | 32782544 | [M+Na]+ 60   | 191 |
| 8214606  | 13359388 | [1244][M+1]+ | 12  |
| 686139.1 | 98577.67 |              | 293 |
| 96322.65 | 55207.79 | [1411][M+2]+ | 34  |
| 1640072  | 818175.4 | [M+K+HCO     | 18  |
| 150321.4 | 139881.6 |              | 249 |
| 212342   | 89349.69 |              | 389 |
| 2444508  | 2389593  | [M+Na]+ 30   | 193 |
| 78118.2  | 57682.25 | [M+H]+ 51:   | 208 |
| 766299.1 | 179073.5 |              | 236 |
| 1417234  | 3593492  | [639][M+1]+  | 119 |
| 16622.85 | 92197.81 |              | 172 |
| 41706.09 | 0        | [85][M+1]+   | 276 |
| 1817995  | 2510189  | [432][M]+    | 136 |
| 8438389  | 35353622 |              | 1   |
| 146915.8 | 202911.1 | [822][M+1]2+ | 29  |

|          |          |              |     |
|----------|----------|--------------|-----|
| 124540.2 | 1347542  |              | 33  |
| 12370.03 | 129865.4 |              | 174 |
| 229672.9 | 166663.8 | [M+Na]+ 3:   | 103 |
| 438481.9 | 545842.7 |              | 467 |
| 345753.8 | 560047   |              | 105 |
| 357935.7 | 866883.3 | [1523][M]+   | 147 |
| 57800.56 | 1042593  | [393][M+1]+  | 55  |
| 264982.6 | 400321.3 | [M+H]+ 33:   | 27  |
| 48449.87 | 82208.26 | [2M+Na+K]    | 49  |
| 11309261 | 29375229 |              | 122 |
| 435652.6 | 1235475  | [114][M+1]+  | 255 |
| 90859.31 | 2597147  | [M+H]+ 39:   | 57  |
| 11364964 | 3330637  | [182][M]+    | 10  |
| 677113.7 | 733053   | [1358][M]+   | 186 |
| 3.11E+08 | 1.66E+09 |              | 1   |
| 1211241  | 791797.1 | [1530][M+3]+ | 100 |
| 2171173  | 5592070  | [M+3Na-H]    | 119 |
| 1877203  | 850711.6 |              | 111 |
| 195611.5 | 149445.6 | [M+K+NH3     | 104 |
| 492640.3 | 236642.1 | [3M+3Na+H    | 254 |
| 937845.7 | 0        | [M+H-CO2]    | 180 |
| 313289.2 | 228342.9 | [M+H+NH3     | 254 |
| 245316.7 | 829284   | [115][M+1]2+ | 2   |
| 1142787  | 1094627  | [1473][M]2+  | 195 |
| 326148.9 | 283278.3 |              | 20  |
| 4270043  | 6089885  |              | 1   |
| 47370.44 | 0        |              | 158 |
| 15383354 | 14872688 | [780][M+1]+  | 115 |
| 2253330  | 3524852  | [1526][M]+   | 144 |
| 54750714 | 52504859 | [780][M]+    | 115 |
| 43642.3  | 40605.63 | [2M+3Na+H    | 199 |
| 482128.7 | 115217.1 | [940][M+1]+  | 300 |
| 9170631  | 7919789  |              | 46  |
| 694570.5 | 447267.2 |              | 302 |
| 456913.3 | 551931.7 |              | 29  |
| 1456249  | 80034.36 |              | 19  |
| 278350.8 | 270421.6 | [356][M+3]+  | 18  |
| 859228.3 | 2486368  |              | 179 |
| 4488306  | 6509339  |              | 4   |
| 5598921  | 18025267 |              | 1   |
| 523153.4 | 5532672  | [M+K]+ 37:   | 40  |
| 126639.9 | 1397947  | [3M+H+K]2    | 11  |
| 1004498  | 955882.9 | [611][M]+    | 211 |
| 283691.3 | 6855212  |              | 247 |
| 55323.89 | 14335.16 |              | 62  |
| 833789   | 595672.5 |              | 112 |
| 57224.08 | 97744.33 | [M+Na]+ 1:   | 160 |

|          |          |                     |     |
|----------|----------|---------------------|-----|
| 185073.5 | 121449.8 | [M+K+NH3            | 83  |
| 1014660  | 147387.7 | [M+H+CF3O           | 208 |
| 7864093  | 11470926 |                     | 14  |
| 3073482  | 2572178  | [595][M]+ [M+H+NH3  | 205 |
| 768366.8 | 1154785  |                     | 274 |
| 653747.1 | 117773.9 | [M+Na]+ 4:          | 86  |
| 2744471  | 460496.6 |                     | 149 |
| 196088.3 | 434214.8 | [M+K+NaCl           | 119 |
| 13110161 | 1.01E+08 | [1362][M+2]+        | 1   |
| 1077923  | 89629.96 | [965][M]+ [M+K+NaCl | 33  |
| 525108.5 | 1331771  | [760][M]+           | 119 |
| 168568   | 19549.31 | [1196][M+2]+        | 177 |
| 365336.3 | 57071.84 | [M+Na]+ 5:          | 176 |
| 1250817  | 137232.5 |                     | 231 |
| 190210.6 | 19554.95 |                     | 18  |
| 1240260  | 426160.3 | [1495][M+1]+        | 139 |
| 239925.8 | 269988.7 |                     | 18  |
| 2602483  | 1376040  | [M+2K-H]+           | 104 |
| 701092.2 | 154230.7 | [3M+3K-H]           | 40  |
| 625018.3 | 583752.8 | [361][M+2]2+        | 29  |
| 817376.1 | 123471.9 |                     | 276 |
| 658199.7 | 10311571 |                     | 14  |
| 21903.34 | 0        |                     | 418 |
| 16146827 | 23112189 | [731][M+1]+         | 11  |
| 24730.73 | 0        | [3M+2Na]2           | 25  |
| 91360.83 | 1295959  | [M+H-H2O]           | 25  |
| 3155837  | 250408.9 | [M+H-C2H4           | 95  |
| 4977690  | 54111029 | [306][M]+           | 152 |
| 794916.6 | 328332.6 | [2M+Na]+ :          | 112 |
| 2468202  | 4999973  | [M+H]+ 54:          | 4   |
| 3521718  | 5848617  | [169][M]+           | 107 |
| 241700.3 | 365818.7 |                     | 116 |
| 3111993  | 314939.3 | [303][M+1]+         | 51  |
| 110470   | 10597.73 | [2M+2K-H]           | 238 |
| 383237.8 | 325476   | [M+H]+ 66:          | 333 |
| 720469.5 | 28607204 |                     | 1   |
| 7584.015 | 42830.55 | [742][M+1]3+        | 39  |
| 441784.7 | 300450.6 | [M+H+HCC            | 18  |
| 6729613  | 4458224  | [M+Na]+ 5:          | 189 |
| 135327   | 228111.7 | [M+H-HCO            | 217 |
| 10434601 | 8930814  |                     | 256 |
| 498069.4 | 555857.7 | [735][M+2]+         | 18  |
| 409464.9 | 70812.12 | [263][M+3]+         | 29  |
| 89491.74 | 177178.4 | [3M+H+K]2           | 119 |
| 37382.31 | 49831.53 |                     | 211 |
| 122974.1 | 673840   | [720][M+1]+         | 49  |
| 5.63E+08 | 3.23E+09 | [1350][M+5]+        | 1   |

|          |          |                      |     |
|----------|----------|----------------------|-----|
| 94406.26 | 3405629  | [M+2K-H]+            | 31  |
| 123663.2 | 6503340  | [814][M]+            | 152 |
| 129718.2 | 107093   |                      | 129 |
| 951916.2 | 401908.8 | [3M+3Na+]            | 18  |
| 30256.75 | 1053988  | [M+K]+ 37            | 199 |
| 3310218  | 11461661 | [1327][M+2]+         | 1   |
| 133636.8 | 96461.73 | [M+H+HCC             | 341 |
| 1458299  | 1089581  | [1377][M+1]+         | 29  |
| 17153.15 | 706520.8 |                      | 173 |
| 56086.52 | 81604.02 |                      | 330 |
| 101079.2 | 255841.6 | [M+Na]+ 3            | 29  |
| 134505   | 149080.5 | [332][M+1]2+         | 107 |
| 648018.8 | 25035.33 |                      | 199 |
| 1904185  | 1766118  |                      | 251 |
| 41383918 | 231844.8 | [38][M]+             | 41  |
| 413747.5 | 490333.2 |                      | 55  |
| 14383728 | 39038832 |                      | 6   |
| 809498.5 | 78061.01 |                      | 49  |
| 5E+09    | 6.51E+09 | [600][M]+ [M+H]+ 40  | 4   |
| 1004347  | 2974063  |                      | 328 |
| 1558984  | 1115963  | [232][M+2]+          | 14  |
| 37402.65 | 14513.56 | [M+2H]2+ !           | 208 |
| 2177038  | 3452938  | [586][M+1]2+         | 85  |
| 787347.5 | 2291817  | [761][M]+            | 94  |
| 1723902  | 1524738  | [810][M+1]+          | 190 |
| 2752796  | 411466.9 |                      | 44  |
| 2172174  | 3657856  |                      | 29  |
| 31109451 | 31729173 |                      | 219 |
| 241370.6 | 380142.7 | [M+K]+ 18            | 44  |
| 32608.67 | 107075.8 |                      | 18  |
| 5218056  | 6642141  | [395][M]+ [M+H-H2O]  | 11  |
| 3690623  | 33878542 | [1542][M+1]+         | 206 |
| 311367.9 | 753181.5 | [1412][M+2]+         | 173 |
| 340315.3 | 185730.7 | [201][M]2+           | 18  |
| 53960783 | 3.12E+08 | [1457][M]+           | 1   |
| 222902.5 | 203332.2 |                      | 44  |
| 137575.9 | 615362.4 |                      | 435 |
| 682685.3 | 612696.7 | [422][M+4]2+         | 29  |
| 148309.5 | 23821.14 |                      | 83  |
| 29945510 | 19835612 | [270][M+1]+          | 16  |
| 7262752  | 65341627 | [1542][M]+ [M+H]+ 96 | 206 |
| 28376230 | 18853361 |                      | 325 |
| 1841320  | 1998673  | [M+2H]2+ !           | 18  |
| 216554.1 | 1188688  |                      | 81  |
| 8645.776 | 10947.04 |                      | 255 |
| 152564.7 | 552345.8 | [15][M+1]+           | 104 |
| 3731414  | 7376720  |                      | 2   |

|          |          |                      |     |
|----------|----------|----------------------|-----|
| 50000.44 | 17683.71 | [1411][M+4]+         | 34  |
| 230403.4 | 200708.4 |                      | 341 |
| 653162.9 | 749576.5 |                      | 101 |
| 582142.1 | 11740950 | [M+H]+ 38:           | 55  |
| 1140775  | 1713125  | [115][M+2]2+         | 2   |
| 501073.2 | 515791.1 |                      | 12  |
| 12468.93 | 0        |                      | 241 |
| 1525455  | 2887773  | [1171][M]+           | 10  |
| 5.93E+08 | 2.73E+09 | [1362][M]+           | 1   |
| 359402.6 | 685177   |                      | 147 |
| 205328.4 | 278449.6 | [M+H]+ 54:           | 17  |
| 1854153  | 305437.1 |                      | 337 |
| 20727146 | 1.12E+08 | [1457][M+1]+         | 1   |
| 2397798  | 390797.4 | [182][M+1]+          | 10  |
| 2240427  | 6339967  |                      | 1   |
| 4.58E+08 | 3.38E+08 | [902][M]+ [M+H]+ 49: | 25  |
| 400046   | 830672.9 | [1138][M]+           | 229 |
| 80640.26 | 51150.06 |                      | 116 |
| 1036656  | 1118863  |                      | 81  |
| 419977.7 | 539319.1 | [M+K]+ 26:           | 26  |
| 523173   | 308735   |                      | 23  |
| 248434.9 | 49374.84 | [722][M+1]+          | 58  |
| 1196807  | 1177937  | [1345][M+1]+         | 53  |
| 4745011  | 15860842 | [688][M]2+           | 4   |
| 239948.5 | 151574.8 |                      | 23  |
| 315828.4 | 101095.8 | [M+Na]+ 4:           | 245 |
| 21717228 | 15191904 | [1492][M]+           | 266 |
| 322996.4 | 98707.51 | [M+Na]+ 2:           | 217 |
| 1455543  | 572121.7 | [138][M+1]+          | 218 |
| 6.03E+08 | 3.15E+09 | [478][M]+            | 1   |
| 146954.7 | 426968   |                      | 152 |
| 478606.5 | 931653.3 |                      | 105 |
| 6666295  | 6592103  | [847][M]+            | 147 |
| 229508.4 | 239060.3 |                      | 151 |
| 410104.4 | 103742   | [2M+2Na+]            | 64  |
| 558751   | 265596.8 | [1508][M+1]+         | 29  |
| 2440464  | 2064428  | [1443][M+1]+         | 29  |
| 2362239  | 1218762  |                      | 18  |
| 141129.5 | 226686.5 |                      | 116 |
| 93517.46 | 257928.5 | [M+Na]+ 3:           | 178 |
| 107763.7 | 21345.66 |                      | 148 |
| 2011131  | 18873327 | [972][M+1]2+         | 211 |
| 2458718  | 1095467  | [1034][M+1]+         | 87  |
| 37535.04 | 216020.5 | [M+K+NH3             | 264 |
| 479931.3 | 405018.3 | [1510][M+1]2+        | 467 |
| 179851.1 | 146181.8 | [M+Na]+ 7:           | 34  |
| 890226.6 | 3032397  | [M+K]+ 86:           | 4   |

|          |          |                       |     |
|----------|----------|-----------------------|-----|
| 5188023  | 4743415  | [M+Na]+ 3:            | 100 |
| 3706665  | 33421655 | [972][M]2+            | 211 |
| 5428117  | 5558324  | [266][M]+             | 303 |
| 1029951  | 33044208 | [416][M+3]2+          | 1   |
| 291218.7 | 39314.93 |                       | 264 |
| 4876741  | 5721123  |                       | 117 |
| 287242.8 | 19596.85 | [3M+Na+K]             | 215 |
| 119961   | 20537.36 |                       | 86  |
| 300891.3 | 191787.5 | [1411][M]+ [M+H]+ 74: | 34  |
| 2752854  | 3973986  | [525][M]2+            | 258 |
| 369963.5 | 32800.46 | [M+H]+ 56:            | 208 |
| 287182.4 | 389995.2 |                       | 344 |
| 3606880  | 461596.8 | [769][M]+             | 32  |
| 110403.4 | 521865   | [M+H+HCC              | 104 |
| 1981446  | 1642508  | [3M+H+K]2             | 100 |
| 1362318  | 1212889  |                       | 251 |
| 4876029  | 2591397  | [371][M]+             | 272 |
| 284853.4 | 212643.7 | [M+H]+ 69:            | 76  |
| 2721016  | 3075227  | [M+H-CO]+             | 4   |
| 74614689 | 1.25E+08 |                       | 38  |
| 660556.5 | 617025.5 |                       | 456 |
| 290499.4 | 103719.1 | [2M+Na+3I             | 217 |
| 2900530  | 12278362 | [59][M+4]2+           | 4   |
| 663185   | 1042209  | [1119][M]2 [M+2H]2+ : | 322 |
| 10126.37 | 719654.3 |                       | 104 |
| 49657.85 | 2829384  | [M+H-CO2]             | 31  |
| 937914.3 | 106275   |                       | 296 |
| 961030   | 680516.4 | [M+H-CH2]             | 215 |
| 0        | 269392.4 |                       | 199 |
| 5352624  | 6179417  | [1016][M]+            | 115 |
| 223511.1 | 465657.4 |                       | 410 |
| 129683.7 | 157916.4 | [M+K+HCO              | 34  |
| 271256   | 149273.4 |                       | 224 |
| 4045238  | 24119609 |                       | 30  |
| 2865651  | 143191   | [431][M]+ [M+H+HCC    | 230 |
| 1187406  | 5902690  | [59][M+3]2+           | 4   |
| 7025.844 | 97606.55 |                       | 288 |
| 1103673  | 3309768  | [115][M]2+            | 2   |
| 10068116 | 7388275  |                       | 211 |
| 489223.1 | 247528.3 | [M+H]+ 68:            | 31  |
| 29136985 | 32257230 | [1133][M]+ [M+K+NH3   | 75  |
| 252224.4 | 230003.8 | [M+H]+ 48:            | 87  |
| 432489.2 | 5394953  | [306][M+1]+           | 152 |
| 1330122  | 1461474  | [482][M]3+            | 442 |
| 118274.4 | 213017.9 |                       | 39  |
| 241147   | 258659.4 |                       | 440 |
| 141798.2 | 7967.666 | [M+Na]+ 4:            | 293 |

|          |          |              |            |     |
|----------|----------|--------------|------------|-----|
| 10147189 | 5159549  | [911][M]+    | [M+K+NH3   | 319 |
| 644481.9 | 2407370  | [1488][M+4]+ |            | 11  |
| 8208.611 | 23885.84 |              |            | 281 |
| 209587.2 | 141117.2 |              | [M+2H]2+   | 47  |
| 358104.6 | 460667.7 |              |            | 25  |
| 1888717  | 1965948  |              |            | 253 |
| 993826.8 | 916136.1 |              |            | 112 |
| 396664.9 | 608631   |              |            | 317 |
| 10336395 | 10278800 | [1004][M]2+  |            | 334 |
| 835587.6 | 7736999  |              |            | 1   |
| 12170.33 | 0        |              | [M+2H-C2H  | 18  |
| 19757.71 | 47384.43 |              |            | 231 |
| 409000.8 | 433985.4 |              |            | 451 |
| 337564.8 | 1611361  | [1197][M+2]+ |            | 11  |
| 6151998  | 4353153  |              | [M+K]+ 207 | 180 |
| 992864.4 | 671515.9 |              |            | 151 |
| 25777.01 | 124737   |              | [M+H-NH3]  | 18  |
| 65831.55 | 287095.1 |              |            | 169 |
| 137824.7 | 80231.35 |              |            | 36  |
| 388618.4 | 182598.2 |              | [M+K+NH3   | 14  |
| 7219240  | 6597203  | [583][M]+    |            | 133 |
| 800895.6 | 735048.3 | [500][M+1]+  |            | 222 |
| 622793.2 | 7030306  |              | [M+K]+ 647 | 25  |
| 78482.92 | 97104.9  |              |            | 70  |
| 356123.8 | 174102.5 | [1083][M+1]+ |            | 312 |
| 658109.2 | 611139.5 | [834][M]3+   |            | 282 |
| 1189254  | 1566911  |              |            | 41  |
| 46554.57 | 17247.32 | [391][M+1]+  |            | 45  |
| 536884.8 | 277752.7 | [1430][M+1]+ |            | 29  |
| 304023.6 | 226591.5 |              |            | 11  |
| 1.54E+08 | 1.06E+08 | [270][M]+    | [M+H]+ 317 | 16  |
| 288579.4 | 201891.9 |              | [M+K]+ 276 | 289 |
| 1322197  | 95375.8  |              |            | 93  |
| 277732   | 176217.1 |              | [M+H-CH4]  | 223 |
| 1088701  | 703285.9 | [302][M+2]+  |            | 118 |
| 1175323  | 977943.8 |              |            | 2   |
| 1615088  | 723221.7 |              |            | 175 |
| 174374.6 | 329514.6 |              |            | 228 |
| 18216988 | 44628133 |              |            | 53  |
| 892431.1 | 631082.4 |              | [M+K]+ 417 | 14  |
| 131659.9 | 32559.09 |              | [M+Na]+ 27 | 119 |
| 3940427  | 3971626  | [345][M]+    |            | 80  |
| 140312.4 | 2374741  |              |            | 14  |
| 867886.1 | 1212794  |              | [M+2K]2+   | 76  |
| 89869.91 | 0        |              | [2M+Na+K]  | 107 |
| 2160875  | 1974660  | [353][M+2]3+ |            | 232 |
| 932355.8 | 6307141  |              | [M+K]+ 673 | 18  |



|          |          |                                               |     |
|----------|----------|-----------------------------------------------|-----|
| 1319102  | 1163953  |                                               | 100 |
| 2998259  | 1608070  | [M+Na] <sup>+</sup> 3                         | 11  |
| 1050900  | 407224.5 | [916][M] <sup>+</sup>                         | 190 |
| 554050.5 | 454487.9 |                                               | 283 |
| 1696353  | 1045282  | [770][M+1] <sup>+</sup>                       | 319 |
| 4662933  | 4329529  |                                               | 17  |
| 14378.35 | 0        | [1411][M+3] <sup>+</sup>                      | 34  |
| 483900.8 | 68148.64 |                                               | 23  |
| 66661.61 | 584257.6 |                                               | 384 |
| 12412308 | 28276403 | [331][M] <sup>3+</sup>                        | 1   |
| 10014487 | 20432843 |                                               | 7   |
| 9868232  | 9558436  | [363][M] <sup>2+</sup> [M+2H] <sup>2+</sup> 1 | 18  |
| 7172229  | 5599675  | [1443][M] <sup>+</sup> [M+K] <sup>+</sup> 72  | 29  |
| 261924.1 | 481361.2 | [M+2H-C3H]                                    | 153 |
| 816728.8 | 1620801  | [1453][M+3] <sup>+</sup>                      | 85  |
| 6249142  | 1999925  | [1311][M] <sup>+</sup>                        | 254 |
| 280061.5 | 243155.8 |                                               | 328 |
| 0        | 10867.07 | [M+Na+Na]                                     | 34  |
| 536521.1 | 278963.2 |                                               | 24  |
| 68290.52 | 53393.24 |                                               | 263 |
| 721248.6 | 803446.3 | [3M+2Na] <sup>2</sup>                         | 281 |
| 11409428 | 4976134  | [138][M] <sup>+</sup>                         | 218 |
| 4034470  | 5879597  |                                               | 159 |
| 1467093  | 91241.96 | [988][M+1] <sup>+</sup>                       | 43  |
| 17725941 | 4388449  |                                               | 235 |
| 878003.6 | 774668.9 | [M+H+HCC]                                     | 18  |
| 97378.82 | 85472.39 |                                               | 302 |
| 112192.8 | 99451.78 |                                               | 58  |
| 2584859  | 930348.1 | [1366][M] <sup>+</sup>                        | 175 |
| 460746.3 | 119116.5 |                                               | 190 |
| 1225550  | 3627166  | [1532][M+1] <sup>+</sup>                      | 7   |
| 3685792  | 1172177  | [M+H] <sup>+</sup> 41                         | 23  |
| 486505.2 | 88481.58 |                                               | 78  |
| 1039579  | 18077733 |                                               | 1   |
| 52794.86 | 121727   |                                               | 344 |
| 3433157  | 5811193  | [M+H+K] <sup>2+</sup>                         | 4   |
| 440904.8 | 42975.27 |                                               | 113 |
| 481429.5 | 462351.2 | [1220][M+1] <sup>+</sup>                      | 186 |
| 8622350  | 5299846  | [770][M] <sup>+</sup> [M+Na+NH]               | 319 |
| 122613.1 | 182651.2 |                                               | 129 |
| 216596.3 | 4744968  | [580][M+1] <sup>+</sup>                       | 14  |
| 10386090 | 15793845 | [373][M+2] <sup>2+</sup>                      | 1   |
| 318427.4 | 936529.8 |                                               | 61  |
| 7504328  | 12803573 |                                               | 313 |
| 87637.94 | 50811.26 | [M+K+NaCl]                                    | 171 |
| 4921035  | 6465225  | [227][M] <sup>2+</sup>                        | 29  |
| 352097.9 | 1088570  | [M+K+NH <sub>3</sub> ]                        | 119 |

|          |          |                       |     |
|----------|----------|-----------------------|-----|
| 162637.3 | 47783.01 |                       | 19  |
| 1729886  | 8474780  |                       | 11  |
| 858712.2 | 1773453  | [1489][M]+            | 167 |
| 935030.2 | 936564.8 |                       | 40  |
| 250607.7 | 604920.6 |                       | 164 |
| 1254553  | 1480940  |                       | 385 |
| 122698.3 | 424234.7 | [M+Na]+ 4!            | 284 |
| 934986.3 | 120974.8 | [929][M]+ [M+K+NH3    | 160 |
| 524599.9 | 305663.9 | [360][M+1]+           | 86  |
| 21103.42 | 20349.4  |                       | 158 |
| 697663.7 | 1077875  | [896][M]+             | 196 |
| 1215506  | 1194983  |                       | 8   |
| 1033668  | 242463   | [1385][M]+ [M+K]+ 68! | 100 |
| 2249653  | 3190233  | [671][M]+             | 283 |
| 578409.6 | 1388395  | [M+2H-CO(             | 11  |
| 461958.7 | 10033663 | [M+K]+ 37(            | 31  |
| 619803.2 | 267412.6 |                       | 107 |
| 4974892  | 5129476  | [149][M+1]2+          | 60  |
| 124527.2 | 21561.89 |                       | 57  |
| 1882487  | 1043328  | [740][M]+ [M+H-H2O]   | 223 |
| 345640.3 | 52409.22 |                       | 359 |
| 207273.3 | 23376.63 |                       | 204 |
| 668112.8 | 868365.3 | [979][M+2]+           | 190 |
| 130290.8 | 22828.56 | [M+Na]+ 7(            | 29  |
| 420665.6 | 488064   |                       | 10  |
| 190050.4 | 148261.7 | [M+K]+ 69!            | 34  |
| 897708.6 | 656984.9 | [325][M]+             | 382 |
| 80661.23 | 125525.5 |                       | 44  |
| 0        | 9824560  |                       | 98  |
| 3424607  | 2955271  | [1227][M+1]2+         | 191 |
| 4036001  | 1810189  | [1379][M+2]+          | 18  |
| 96053.81 | 284736.1 |                       | 289 |
| 2937066  | 2337039  | [M+2H]2+ :            | 251 |
| 2167914  | 647904.8 | [1240][M+1]+          | 309 |
| 1877951  | 634169   | [1311][M+1]+          | 254 |
| 864178   | 2470066  |                       | 70  |
| 560869.1 | 1.92E+08 |                       | 39  |
| 1493947  | 120501.3 |                       | 157 |
| 401790.1 | 447368.6 |                       | 371 |
| 11344.07 | 258632   |                       | 88  |
| 128330.7 | 59588.59 |                       | 231 |
| 1665080  | 1112804  | [42][M]+              | 254 |
| 445256.8 | 981549.5 | [M+2H-CH:             | 289 |
| 174064.2 | 307119.8 |                       | 51  |
| 222759.6 | 137181.4 |                       | 70  |
| 82546098 | 22845539 | [35][M]+              | 93  |
| 109918.4 | 223375.8 | [567][M+1]+           | 415 |

|          |          |                       |     |
|----------|----------|-----------------------|-----|
| 79313.64 | 46031.99 |                       | 419 |
| 3063801  | 1778768  |                       | 113 |
| 558293.8 | 1450796  |                       | 119 |
| 916062.4 | 630424.8 |                       | 55  |
| 166638.3 | 34948.78 |                       | 280 |
| 24116910 | 303377.5 | [M+H+HCC              | 55  |
| 249203   | 529426.7 | [162][M+1]+           | 17  |
| 536998.5 | 88402.8  | [1001][M]+            | 170 |
| 33299.93 | 24521.16 |                       | 86  |
| 1654599  | 1544993  | [1135][M]+            | 96  |
| 270105.8 | 162201   |                       | 154 |
| 1937548  | 2133938  | [397][M+1]3+          | 25  |
| 214805.6 | 122138.1 | [1343][M]+            | 34  |
| 2699146  | 9647781  | [M+H]+ 93             | 11  |
| 4903692  | 3230236  | [1408][M+1]+          | 29  |
| 753464.5 | 394730.7 | [M+Na]+ 6             | 31  |
| 3268723  | 4410945  |                       | 131 |
| 904933.1 | 248773.7 | [2M+Na]+ :            | 24  |
| 6308201  | 58642847 | [1554][M]+            | 211 |
| 13895277 | 16668353 |                       | 252 |
| 301539.9 | 29581.07 |                       | 111 |
| 428317.5 | 78877.09 |                       | 326 |
| 596132.7 | 179625.4 | [907][M+2]+           | 223 |
| 3413411  | 31712819 | [1554][M+1]+          | 211 |
| 3267088  | 2551600  | [607][M]+ [M+Na]+ 3   | 107 |
| 1812914  | 142279.8 | [1010][M]+ [M+K]+ 49  | 264 |
| 630382.7 | 154539   | [1065][M+2]+          | 252 |
| 453097.3 | 132389.9 | [1301][M]+            | 34  |
| 813754.6 | 1778219  |                       | 284 |
| 113813.9 | 113952.5 | [M+Na]+ 3             | 169 |
| 8330676  | 7510839  | [810][M]+             | 190 |
| 1415549  | 1501767  | [1220][M]+            | 186 |
| 11198358 | 12248912 | [M+K]+ 25             | 18  |
| 120773.2 | 1220636  | [M+K]+ 37             | 40  |
| 296562.3 | 371793.2 |                       | 11  |
| 896115.5 | 799473.2 | [3M+H+Na              | 289 |
| 922474.8 | 382250   |                       | 371 |
| 1960109  | 8204115  |                       | 1   |
| 3381962  | 1220457  | [M+H+HCC              | 18  |
| 1015910  | 1037536  |                       | 401 |
| 30953.74 | 873149.5 |                       | 103 |
| 562998.3 | 816255.2 | [529][M]3+ [M+3H]3+ : | 322 |
| 678763.3 | 1040885  |                       | 158 |
| 278803.3 | 113440.8 |                       | 112 |
| 117062.7 | 50822.12 |                       | 18  |
| 181867.9 | 56487.03 |                       | 252 |
| 186865   | 184803.6 |                       | 254 |

|          |          |                                               |     |
|----------|----------|-----------------------------------------------|-----|
| 807448.4 | 690168.9 |                                               | 244 |
| 4902045  | 4912115  | [M+2H] <sup>2+</sup>                          | 325 |
| 112815.9 | 42708.41 | [799][M+1] <sup>+</sup>                       | 137 |
| 168141.3 | 232339.1 |                                               | 210 |
| 1987935  | 1526978  | [M+K+NaCl]                                    | 86  |
| 9505507  | 1739177  | [M+H] <sup>+</sup> 360                        | 117 |
| 547817.7 | 514145.8 | [M+H-CO] <sup>+</sup>                         | 100 |
| 15266542 | 18849565 | [267][M] <sup>+</sup>                         | 47  |
| 88550.42 | 1805818  |                                               | 17  |
| 93991.51 | 3094193  |                                               | 152 |
| 483107.7 | 365700.1 |                                               | 124 |
| 585180.2 | 366951.2 | [M+H] <sup>+</sup> 40:                        | 118 |
| 3819113  | 402246.9 | [575][M] <sup>+</sup>                         | 236 |
| 687279.3 | 780783.3 | [1490][M] <sup>2+</sup>                       | 317 |
| 569502.1 | 486864.2 |                                               | 112 |
| 19559.76 | 6574.905 | [1411][M+5] <sup>+</sup>                      | 34  |
| 264680.1 | 59152.78 |                                               | 272 |
| 1084316  | 263401.7 |                                               | 337 |
| 2819679  | 3380068  | [1516][M] <sup>+</sup>                        | 32  |
| 5872773  | 7553684  |                                               | 200 |
| 637200   | 745852.4 | [M+Na] <sup>+</sup> 2'                        | 155 |
| 2649326  | 2637773  | [1396][M] <sup>+</sup>                        | 11  |
| 1014147  | 579765.5 | [M+K+CF <sub>3</sub> C]                       | 23  |
| 1369727  | 58585.82 | [672][M+1] <sup>+</sup>                       | 136 |
| 1112097  | 865699.9 | [335][M] <sup>+</sup> [M+H+NH <sub>3</sub>    | 86  |
| 4536271  | 4509913  | [500][M] <sup>+</sup>                         | 222 |
| 44620188 | 38133603 |                                               | 219 |
| 5054010  | 6885380  | [1319][M+1] <sup>+</sup>                      | 4   |
| 376268   | 522090.2 |                                               | 284 |
| 199869.4 | 79840.55 | [M+H-H <sub>2</sub> O]                        | 218 |
| 3046941  | 1983449  | [1413][M] <sup>+</sup> [M+Na] <sup>+</sup> 7: | 17  |
| 882492.1 | 537285.3 | [192][M+1] <sup>+</sup>                       | 224 |
| 795422.9 | 373056.1 | [M+2H-CH <sub>2</sub> ]                       | 29  |
| 182471.7 | 35782.22 |                                               | 80  |
| 473750.4 | 549525.2 | [705][M+2] <sup>+</sup>                       | 14  |
| 40391.15 | 521495.2 | [M+2K-H] <sup>+</sup>                         | 49  |
| 2536621  | 3503872  | [381][M] <sup>2+</sup>                        | 231 |
| 477329.8 | 74105.65 | [799][M] <sup>+</sup>                         | 137 |
| 762511.6 | 4754349  |                                               | 11  |
| 61496.78 | 15378.91 |                                               | 34  |
| 10027157 | 30594313 |                                               | 1   |
| 27916.86 | 0        | [1102][M+1] <sup>+</sup>                      | 47  |
| 1459789  | 4097325  | [688][M+2] <sup>2+</sup>                      | 4   |
| 1403461  | 996312.5 |                                               | 180 |
| 924990.7 | 1632200  | [121][M] <sup>2+</sup> [M+2K] <sup>2+</sup> 4 | 107 |
| 66994.65 | 0        |                                               | 149 |
| 805511.3 | 20839.19 |                                               | 216 |

|          |          |                       |     |
|----------|----------|-----------------------|-----|
| 7640.13  | 519391.2 |                       | 288 |
| 2902247  | 2270964  | [426][M]+ [M+H+NH3    | 14  |
| 98006.17 | 2098655  | [M+K+NH3              | 18  |
| 357013.5 | 507669.8 | [M+2K-H]+             | 52  |
| 319012.6 | 769940.7 |                       | 70  |
| 5036985  | 3978727  | [863][M]+             | 18  |
| 1662931  | 1036850  | [213][M]+ [M+K]+ 258  | 254 |
| 3756899  | 3423794  | [1262][M+1]2+         | 202 |
| 299745   | 262209.7 |                       | 25  |
| 10410152 | 3980053  | [1034][M]+ [M+H-H2O]  | 87  |
| 6143621  | 33182792 | [729][M]+ [M+H]+ 440  | 49  |
| 76814300 | 4.04E+08 |                       | 1   |
| 403443.7 | 267455.4 | [1430][M]+ [M+H]+ 750 | 29  |
| 1202957  | 1695637  |                       | 415 |
| 13317511 | 16893611 |                       | 200 |
| 205310   | 40305.24 |                       | 60  |
| 342572.2 | 14474.66 |                       | 237 |
| 101123.3 | 81082.79 |                       | 290 |
| 4534074  | 3266408  | [2M+Na]+ :            | 16  |
| 9381868  | 3099963  | [1156][M]+            | 87  |
| 376847.6 | 50046.13 |                       | 93  |
| 23367411 | 55783498 |                       | 1   |
| 114855.2 | 0        | [1451][M+3]+          | 29  |
| 223106.9 | 141657.2 |                       | 68  |
| 980602.7 | 3353401  |                       | 6   |
| 106057.3 | 2735185  | [M+K]+ 510            | 31  |
| 1577504  | 2550187  | [630][M+1]2+          | 139 |
| 169376.5 | 11644.72 |                       | 22  |
| 6757631  | 5971121  |                       | 222 |
| 153208.7 | 162945.8 |                       | 68  |
| 223924.7 | 352475   | [432][M+1]+           | 136 |
| 4580836  | 6412792  | [663][M+1]2+          | 139 |
| 1007746  | 710189.1 |                       | 111 |
| 346131.3 | 542528.1 | [M+2K-H]+             | 119 |
| 3232092  | 4293865  | [556][M]2+            | 85  |
| 1143855  | 168022.2 |                       | 186 |
| 1184995  | 45673319 |                       | 1   |
| 327913.4 | 379543.4 | [495][M+1]3+          | 245 |
| 425412.4 | 624757.3 | [M+H]+ 500            | 55  |
| 1570003  | 3240148  |                       | 2   |
| 70637.46 | 14265.57 |                       | 182 |
| 1090624  | 0        | [M+H]+ 470            | 180 |
| 47877.95 | 19230.67 |                       | 29  |
| 13219225 | 17139111 | [663][M]2+            | 139 |
| 917120   | 423078   | [M+2H]2+ !            | 18  |
| 2593001  | 817850.7 |                       | 325 |
| 623003.8 | 579698.4 | [1109][M+1]3+         | 456 |

|          |          |                       |     |
|----------|----------|-----------------------|-----|
| 303865.5 | 45338.39 |                       | 78  |
| 557380   | 433759.9 | [1218][M+2]+          | 29  |
| 94897582 | 7.08E+08 | [1362][M+1]+          | 1   |
| 1642675  | 9745101  | [M+H]+ 39             | 49  |
| 325928.8 | 73778.96 | [M+K]+ 54             | 18  |
| 9822010  | 7615757  | [90][M]+              | 52  |
| 60219.33 | 25617.48 |                       | 34  |
| 12693763 | 12407579 | [353][M]3+ [M+3H]3+ : | 232 |
| 1350979  | 547384.3 |                       | 235 |
| 114135.6 | 128259.4 |                       | 302 |
| 301304.7 | 70688.9  | [M+2H-HC              | 55  |
| 46216.68 | 6346.589 | [2M+Na+K]             | 138 |
| 226650.8 | 201372.9 |                       | 119 |
| 71290.93 | 137901.7 | [761][M+1]+           | 94  |
| 811726   | 711299.6 | [1361][M]2+           | 40  |
| 480782   | 191235.8 | [1165][M+1]+          | 47  |
| 2505009  | 1906282  |                       | 282 |
| 1287746  | 457870.4 | [532][M]+             | 366 |
| 2671444  | 2321089  | [363][M+2]2+          | 18  |
| 219089   | 380448.5 |                       | 283 |
| 857103.6 | 1635449  | [1080][M]+ [M+Na]+ 5: | 217 |
| 728380.2 | 951925.5 |                       | 2   |
| 1054592  | 1020144  | [298][M]+ [M+H+NH3    | 221 |
| 100381   | 332647.5 |                       | 90  |
| 2405317  | 2767650  | [1421][M+1]+          | 149 |
| 1437676  | 24725247 |                       | 265 |
| 90395.69 | 77553.95 | [635][M+1]+           | 225 |
| 0        | 226307.7 |                       | 49  |
| 2249615  | 6490286  | [924][M+4]+           | 11  |
| 6980560  | 7880158  | [979][M+1]+           | 190 |
| 229997.3 | 367487   | [M+Na]+ 2:            | 116 |
| 351515.2 | 379769.2 |                       | 99  |
| 184731.3 | 180460.7 | [M+K]+ 33:            | 104 |
| 1731774  | 874321.6 | [91][M+1]+            | 49  |
| 1213842  | 1538372  | [819][M]+             | 359 |
| 266010.5 | 236292.9 |                       | 178 |
| 217709   | 2038035  | [M+Na]+ 2:            | 17  |
| 223218.1 | 183602.7 |                       | 114 |
| 303395.3 | 126713.3 | [2M+Na+K]             | 66  |
| 8274045  | 7978583  |                       | 339 |
| 825992.5 | 948903.7 |                       | 453 |
| 611806.8 | 590289   | [1578][M+3]+          | 100 |
| 353102.8 | 120930   |                       | 294 |
| 3166035  | 5766636  | [505][M]+             | 41  |
| 9834017  | 8891420  | [735][M]+ [M+Na]+ 4:  | 18  |
| 150812.6 | 31591.75 | [M+H]+ 25:            | 95  |
| 3279231  | 9886380  |                       | 1   |

|          |          |              |     |
|----------|----------|--------------|-----|
| 294149.7 | 324578.7 |              | 86  |
| 82346.88 | 310868.8 | [402][M+2]+  | 105 |
| 946751.4 | 754524.1 | [363][M+4]2+ | 18  |
| 15054473 | 10338959 | [193][M]+    | 49  |
| 293096.3 | 228589   | [M+Na]+ 3:   | 83  |
| 237819.1 | 49169.06 | [1451][M+2]+ | 29  |
| 2624688  | 59422.65 |              | 216 |
| 738180.4 | 375939.8 | [M+Na]+ 5:   | 17  |
| 182070.1 | 3179347  |              | 1   |
| 1042742  | 1033877  | [460][M+1]+  | 29  |
| 7143324  | 2939502  |              | 75  |
| 273163.8 | 290382.1 | [292][M+1]+  | 49  |
| 21427659 | 20119028 | [1428][M]+   | 175 |
| 2234720  | 2430459  | [422][M+2]2+ | 29  |
| 427032.8 | 12076990 |              | 6   |
| 549666.5 | 362018.6 | [1135][M+1]+ | 96  |
| 391036.9 | 812320.6 | [M+K+NaCl    | 119 |
| 5871683  | 6368675  |              | 312 |
| 800624.3 | 3457254  |              | 67  |
| 1216601  | 288840.1 |              | 432 |
| 116607.9 | 0        |              | 18  |
| 33472976 | 28430611 | [M+Na]+ 6:   | 251 |
| 221528.4 | 92190.61 | [1466][M+1]+ | 171 |
| 480582.8 | 367506.1 | [M+K+NH3     | 118 |
| 674726   | 8357206  | [1525][M+2]+ | 203 |
| 1776053  | 322268.9 | [1548][M+1]+ | 25  |
| 379732.8 | 244469.5 |              | 426 |
| 531766.4 | 1864586  |              | 69  |
| 170978   | 105937.3 |              | 354 |
| 2283566  | 10612401 | [962][M]+    | 11  |
| 1053152  | 310225   | [3M+3K-H]    | 104 |
| 721426.1 | 1793830  | [771][M+1]+  | 119 |
| 4398375  | 1363538  |              | 398 |
| 710580.9 | 362927.7 | [3M+2K]2+    | 104 |
| 607875   | 8572940  |              | 365 |
| 6968207  | 866470.5 | [672][M]+    | 136 |
| 4629564  | 9769967  | [1527][M+1]+ | 252 |
| 115326.8 | 127870   |              | 239 |
| 64815.58 | 9293.093 | [948][M+1]+  | 217 |
| 159611.9 | 203218.9 | [12][M+1]+   | 88  |
| 17510266 | 40287021 |              | 1   |
| 2897084  | 2191356  |              | 213 |
| 23111708 | 42858592 | [31][M]2+    | 1   |
| 438672.7 | 268977   |              | 398 |
| 467116   | 154997.6 | [850][M+1]+  | 236 |
| 226814.3 | 1453207  |              | 49  |
| 1322992  | 1446725  | [3M+2Na]2    | 312 |

|          |          |                      |     |
|----------|----------|----------------------|-----|
| 79253330 | 1.85E+08 | [56][M]2+            | 1   |
| 889102.4 | 1013957  | [M+H]+ 65:           | 100 |
| 20866757 | 17242896 | [356][M]+            | 18  |
| 292454.7 | 6753854  | [1359][M+2]+         | 1   |
| 13514968 | 28363515 | [1484][M+1]+         | 139 |
| 137521.5 | 439601.5 | [M+Na+HC             | 55  |
| 82533.73 | 368849.7 |                      | 315 |
| 87732.11 | 47124.92 |                      | 173 |
| 107099.3 | 1243061  | [1399][M+1]+         | 29  |
| 11485.25 | 0        |                      | 66  |
| 420631.9 | 529985.3 | [1055][M+1]+         | 49  |
| 61103.77 | 926923.9 |                      | 124 |
| 478989.5 | 4104461  |                      | 1   |
| 1139635  | 1539603  | [567][M]+            | 415 |
| 1298363  | 1012601  | [583][M+1]+          | 133 |
| 494113.7 | 540948.7 | [M+K]+ 240           | 17  |
| 195595.7 | 74738.04 | [M+Na]+ 50           | 18  |
| 141456.8 | 1135474  | [M+H-CO2]            | 119 |
| 1807634  | 1802680  | [M+K]+ 332           | 4   |
| 864374.3 | 767112.4 |                      | 216 |
| 2109024  | 1098968  | [911][M+1]+          | 319 |
| 1610305  | 5432812  |                      | 53  |
| 276700.2 | 737500.5 | [2M+Na+K]            | 209 |
| 610486.5 | 788070.5 | [319][M+1]+          | 204 |
| 2591277  | 1005132  |                      | 2   |
| 32266433 | 64422920 | [1484][M]+           | 139 |
| 13796529 | 15281591 | [870][M]2+           | 301 |
| 311034.7 | 9552529  |                      | 1   |
| 75518.42 | 146287.7 | [M+H]+ 77:           | 264 |
| 784032.1 | 561347.8 | [M+2H-CH3            | 27  |
| 2798216  | 5258531  |                      | 233 |
| 3185612  | 2143326  | [790][M]+ [M+H+HCC   | 104 |
| 1912791  | 1275931  |                      | 2   |
| 103769.4 | 3114846  |                      | 17  |
| 210430.3 | 236933.4 |                      | 235 |
| 67260.14 | 92859.76 |                      | 378 |
| 1138444  | 564758.7 | [1353][M]2+          | 195 |
| 99464.05 | 38519.32 |                      | 231 |
| 2352392  | 2068351  | [M+K]+ 278           | 16  |
| 602589.3 | 68627.14 | [1427][M+2]+         | 29  |
| 227070.9 | 63194.79 |                      | 104 |
| 59441.74 | 46938.71 |                      | 296 |
| 106277.6 | 44622.01 |                      | 78  |
| 1255950  | 1212521  | [M+K]+ 273           | 25  |
| 135070.5 | 65287.77 |                      | 105 |
| 5139288  | 4802422  | [265][M]+ [M+Na]+ 21 | 243 |
| 663018.6 | 1125885  |                      | 354 |



|          |          |                       |     |
|----------|----------|-----------------------|-----|
| 1.53E+08 | 2.03E+08 | [600][M+2]+           | 4   |
| 1588910  | 581946.8 | [M+Na+Na              | 14  |
| 3418051  | 163456.5 | [M+Na]+ 1!            | 16  |
| 15636195 | 6682165  | [1219][M]+ [M+H]+ 62: | 18  |
| 1042166  | 488255.4 |                       | 285 |
| 4406210  | 4240744  |                       | 339 |
| 1875558  | 893614.3 |                       | 272 |
| 3723483  | 7129601  |                       | 1   |
| 7856915  | 16980240 | [1509][M+1]+          | 200 |
| 2435946  | 5441191  | [1540][M+1]+          | 301 |
| 3364850  | 3865618  | [397][M]3+ [M+3H]3+ : | 25  |
| 595379.6 | 215699.2 | [385][M+1]+           | 365 |
| 184059.9 | 49598.91 | [M+K+NaCl             | 107 |
| 859292.2 | 417499.1 | [140][M+1]+           | 19  |
| 935134.3 | 1652028  | [1572][M]+            | 70  |
| 5340471  | 2052444  | [1101][M]+ [M+2Na-H]  | 29  |
| 1403620  | 849017.6 | [1414][M]2+           | 12  |
| 75706.27 | 37818.6  |                       | 105 |
| 520623.3 | 647029.2 |                       | 405 |
| 863450.4 | 771153.5 |                       | 210 |
| 161784.3 | 4337224  |                       | 1   |
| 247805.2 | 1284609  |                       | 45  |
| 539314.5 | 533672.6 | [707][M+2]2+          | 25  |
| 795750.6 | 213719.1 | [3M+2K]2+             | 18  |
| 7531958  | 2387297  | [1240][M]+            | 309 |
| 58112112 | 1.11E+08 | [1453][M]+            | 85  |
| 6210131  | 7213401  | [870][M+1]2+          | 301 |
| 627072.7 | 346126.4 |                       | 104 |
| 2741701  | 0        |                       | 180 |
| 465300.2 | 12800070 |                       | 289 |
| 279918.6 | 234904.6 | [M+K]+ 49!            | 264 |
| 1255222  | 1664006  |                       | 200 |
| 153086.3 | 404409.3 | [882][M+1]+           | 119 |
| 962842.2 | 1647586  |                       | 314 |
| 101529.9 | 5934735  |                       | 1   |
| 4297136  | 7808680  |                       | 38  |
| 1120887  | 595399.2 | [1396][M+1]+          | 11  |
| 101984.9 | 80628.72 |                       | 62  |
| 7215262  | 8129545  |                       | 242 |
| 4866565  | 12322435 |                       | 1   |
| 18310748 | 38373320 | [1509][M]+            | 200 |
| 14940814 | 57011494 |                       | 1   |
| 2207743  | 195370.5 | [M+Na]+ 3:            | 121 |
| 681599.2 | 700380.7 | [M+H-CO]+             | 333 |
| 76758.69 | 126944.6 | [2M+Na+K]             | 55  |
| 1661392  | 1906117  | [1039][M]2+           | 337 |
| 242277.1 | 270506.6 |                       | 282 |

|          |          |                      |     |
|----------|----------|----------------------|-----|
| 1015798  | 221856.2 | [M+H-C2H4            | 55  |
| 253896   | 210021.4 | [181][M+4]+          | 29  |
| 770911.7 | 348560   | [1163][M+1]+         | 29  |
| 10543461 | 9196949  |                      | 201 |
| 489322.3 | 298598.6 | [170][M+1]+          | 72  |
| 2079436  | 871308.2 | [854][M]+ [M+K]+ 44  | 319 |
| 1165018  | 963415   | [1351][M]+           | 114 |
| 183831.3 | 226849.7 |                      | 93  |
| 1613369  | 911634.9 | [1444][M]2+          | 71  |
| 966816.1 | 79697.06 | [769][M+1]+          | 32  |
| 423109.2 | 555373.4 | [M+H]+ 24            | 289 |
| 102423.8 | 125388   |                      | 26  |
| 440817.5 | 194044.6 |                      | 236 |
| 1134494  | 2526987  | [1527][M+2]+         | 252 |
| 1284341  | 628898.8 | [1101][M+1]+         | 29  |
| 9982790  | 21628747 | [1527][M]+ [M+H]+ 90 | 252 |
| 2165045  | 13608729 | [808][M+1]2+         | 11  |
| 357216.6 | 61910.66 |                      | 91  |
| 12918793 | 12821604 |                      | 312 |
| 642538.7 | 463764.1 |                      | 155 |
| 714692.8 | 667323.6 |                      | 289 |
| 341514.3 | 1031240  | [1489][M+1]+         | 167 |
| 14995123 | 8405865  | [91][M]+ [M+H]+ 24   | 49  |
| 8080898  | 8327355  | [353][M+1]3+         | 232 |
| 318398.3 | 413654.3 |                      | 178 |
| 502859.4 | 125058.2 |                      | 175 |
| 208928.8 | 691937.2 |                      | 111 |
| 664500.7 | 2229167  | [580][M]+ [M+H-CH4]  | 14  |
| 123128   | 137420.2 | [904][M+1]+          | 54  |
| 219556.4 | 220325.7 | [M+H-CH3]            | 232 |
| 1550136  | 2284153  | [659][M]+            | 41  |
| 2073687  | 2388327  |                      | 9   |
| 1720435  | 726272.5 |                      | 2   |
| 74602.77 | 9733.613 |                      | 61  |
| 253355.9 | 233779.1 | [298][M+1]+          | 221 |
| 1579192  | 2699059  | [777][M]2+           | 210 |
| 354195.4 | 410729   | [M+H-C6H8            | 17  |
| 2620764  | 6395647  | [1550][M]+ [M+H]+ 99 | 312 |
| 3733812  | 1697347  | [1219][M+1]+         | 18  |
| 294440.1 | 50076.8  | [M+H-CO]+            | 29  |
| 34876.62 | 7592.033 | [1454][M+3]+         | 47  |
| 112456.9 | 90093.5  | [635][M+2]+          | 225 |
| 198367.9 | 203612.3 |                      | 245 |
| 106332.9 | 124239   | [458][M+2]+          | 313 |
| 865366.9 | 15999287 |                      | 1   |
| 2540033  | 603009.9 | [M+K+HCO             | 18  |
| 1854385  | 990391.3 | [1165][M]+ [M+2Na-H] | 47  |

|          |          |                      |     |
|----------|----------|----------------------|-----|
| 534926.1 | 191867.3 | [936][M+1]+          | 213 |
| 6000672  | 7565650  |                      | 252 |
| 23694086 | 46044153 | [1453][M+1]+         | 85  |
| 7.1E+08  | 1.56E+09 | [553][M]+            | 9   |
| 73475.7  | 223812.6 | [M+H+HCC             | 255 |
| 58876.81 | 1061299  |                      | 306 |
| 91885.21 | 6398358  | [M+K]+ 517           | 289 |
| 16204476 | 25636250 |                      | 4   |
| 304524.2 | 3144718  | [M+K+CF3C            | 119 |
| 63363.67 | 141252.2 |                      | 119 |
| 6311810  | 6609750  | [186][M+1]+          | 18  |
| 762663.7 | 1099147  |                      | 284 |
| 122669   | 773228.9 | [382][M+1]+          | 49  |
| 156216.6 | 152063.2 | [M+H-C6H:            | 49  |
| 764490.7 | 6126064  |                      | 6   |
| 907686.4 | 9039100  |                      | 1   |
| 1813354  | 4005193  | [1509][M+2]+         | 200 |
| 1527493  | 1631524  | [3M+2K]2+            | 252 |
| 1588787  | 879084.5 | [M+H]+ 27:           | 245 |
| 455398.6 | 386569.7 |                      | 23  |
| 36878    | 41896.18 | [M+H-HCO             | 199 |
| 4179268  | 4179415  | [1209][M]+           | 288 |
| 142800.2 | 51539.98 | [1001][M+1]+         | 170 |
| 681673   | 10807054 |                      | 1   |
| 283186.1 | 101003.2 | [M+2Na-H]            | 138 |
| 253434   | 379164.3 |                      | 152 |
| 337719.8 | 534873   | [M+H]+ 33:           | 96  |
| 1673053  | 33414213 |                      | 1   |
| 1253689  | 7052468  |                      | 1   |
| 112378.6 | 52218.32 | [M+Na+HC             | 116 |
| 401744.8 | 197839.7 |                      | 29  |
| 162877   | 383964.9 | [1393][M]+ [M+H-COCl | 264 |
| 119986.4 | 248907.5 | [257][M]+            | 35  |
| 389281.8 | 3652792  |                      | 1   |
| 13069632 | 23393815 |                      | 54  |
| 1002664  | 1033933  |                      | 407 |
| 724723.6 | 4453634  | [1235][M+2]+         | 130 |
| 6185177  | 1118543  | [125][M+1]+          | 93  |
| 1445288  | 7177644  |                      | 1   |
| 23929.04 | 2722550  |                      | 1   |
| 440410.8 | 3486586  |                      | 6   |
| 884628   | 1103401  |                      | 2   |
| 647414.4 | 603380.6 | [971][M+1]+          | 88  |
| 77757.31 | 1150990  |                      | 152 |
| 15968393 | 3.49E+08 |                      | 1   |
| 3488811  | 12118271 |                      | 184 |
| 63772.64 | 37335.81 | [916][M+1]+          | 190 |

|          |          |                     |     |
|----------|----------|---------------------|-----|
| 129966.4 | 127629   | [3M+Na+K]           | 31  |
| 11957063 | 2289462  | [35][M+1]+          | 93  |
| 484173.3 | 494000.5 | [1510][M]2+         | 467 |
| 750637.6 | 248183.2 | [M+H]+ 71!          | 100 |
| 91341092 | 4.64E+08 | [478][M+1]+         | 1   |
| 271835.1 | 349992.3 | [M+H]+ 26!          | 31  |
| 92003600 | 1.79E+08 | [1397][M]+ [M+H+NH3 | 64  |
| 9689070  | 1.8E+08  |                     | 96  |
| 3076099  | 6554365  | [1484][M+2]+        | 139 |
| 3420272  | 3200240  |                     | 112 |
| 176563.3 | 350834.5 | [1224][M+2]+        | 49  |
| 710902.2 | 1074158  |                     | 12  |
| 67437.61 | 587698.2 |                     | 291 |
| 176291   | 269749.4 | [M+H]+ 23!          | 284 |
| 41380.28 | 348616.5 |                     | 152 |
| 794922.8 | 634835.7 | [1473][M+1]2+       | 195 |
| 87971.87 | 35177.27 | [M+Na]+ 4!          | 160 |
| 236552.8 | 5208303  |                     | 1   |
| 113810.2 | 363825.2 |                     | 255 |
| 976108.9 | 616666.9 | [193][M+1]+         | 49  |
| 723122   | 399105.3 | [863][M+2]+         | 18  |
| 38129373 | 42038303 | [1328][M]+          | 1   |
| 66918870 | 3.67E+08 | [730][M]+           | 9   |
| 25390.44 | 622718.8 |                     | 199 |
| 1983838  | 2086538  |                     | 325 |
| 54647.81 | 30189.45 | [M+H-CH4]           | 34  |
| 2471162  | 767136   | [1156][M+1]+        | 87  |
| 100969.2 | 164013.6 | [1296][M+2]+        | 49  |
| 567050.5 | 1127192  | [M+H-CH4]           | 119 |
| 131676.5 | 118067.5 |                     | 41  |
| 74092.39 | 215438.2 |                     | 170 |
| 38230325 | 9083067  | [125][M]+           | 93  |
| 563836   | 51641.79 | [1454][M]+          | 47  |
| 0        | 4281457  |                     | 6   |
| 128838.7 | 119697.8 | [M+Na]+ 8!          | 34  |
| 11350630 | 1135388  | [812][M+1]+         | 132 |
| 1351654  | 114865.2 | [812][M+2]+         | 132 |
| 410405.2 | 174029.7 |                     | 64  |
| 641038.1 | 16767285 |                     | 1   |
| 3602065  | 4489018  |                     | 1   |
| 391156.8 | 7327209  | [M+K]+ 74!          | 31  |
| 113535.1 | 327350.4 |                     | 381 |
| 134312.2 | 220210   |                     | 183 |
| 9462733  | 6459347  | [M+2H]2+ :          | 100 |
| 140539.2 | 519735   |                     | 44  |
| 311683.5 | 349129.9 |                     | 225 |
| 86967.35 | 96708.64 | [213][M+2]+         | 254 |

|          |          |                                               |     |
|----------|----------|-----------------------------------------------|-----|
| 19204995 | 26611723 | [M+2H] <sup>2+</sup>                          | 232 |
| 188233.2 | 142429.2 | [M+2K] <sup>2+</sup>                          | 87  |
| 15126735 | 54681368 | [1398][M+1] <sup>+</sup>                      | 1   |
| 35539490 | 4029902  | [812][M] <sup>+</sup>                         | 132 |
| 6079676  | 8415456  | [820][M] <sup>+</sup>                         | 2   |
| 41109.05 | 569576.8 | [487][M+2] <sup>+</sup>                       | 209 |
| 64139924 | 29977725 | [1130][M] <sup>2+</sup>                       | 18  |
| 1401910  | 1350677  |                                               | 372 |
| 2605378  | 1426599  | [1163][M] <sup>+</sup> [M+Na] <sup>+</sup>    | 29  |
| 1338955  | 1335585  | [1100][M] <sup>2+</sup>                       | 222 |
| 56340.26 | 424337.4 |                                               | 240 |
| 7283986  | 5005985  | [629][M] <sup>+</sup> [M+K+NH <sub>3</sub> ]  | 319 |
| 1712877  | 1738161  | [230][M+1] <sup>+</sup>                       | 16  |
| 5884587  | 3488721  | [1342][M+1] <sup>+</sup>                      | 25  |
| 18925276 | 18694827 | [1566][M] <sup>+</sup>                        | 11  |
| 757340.3 | 1925898  |                                               | 210 |
| 100846.3 | 2410052  |                                               | 31  |
| 290085.8 | 152800.1 | [1351][M+1] <sup>+</sup>                      | 114 |
| 4554894  | 10211139 |                                               | 167 |
| 284216.2 | 238936.8 | [M+K+NH <sub>3</sub> ]                        | 16  |
| 113272.1 | 203666.5 |                                               | 138 |
| 535350.3 | 1052849  |                                               | 60  |
| 7180884  | 16111819 | [1397][M+2] <sup>+</sup>                      | 64  |
| 5753468  | 7155224  | [630][M] <sup>2+</sup>                        | 139 |
| 6416826  | 4164970  | [192][M] <sup>+</sup>                         | 224 |
| 407690.9 | 325673.3 |                                               | 29  |
| 81235.05 | 67906.57 |                                               | 355 |
| 237286.6 | 137623.7 |                                               | 176 |
| 312816   | 585687.3 | [227][M+3] <sup>2+</sup>                      | 29  |
| 8043792  | 7527040  | [1428][M+1] <sup>+</sup>                      | 175 |
| 697888.6 | 1310737  |                                               | 107 |
| 836642.3 | 11931346 | [474][M+2] <sup>+</sup>                       | 1   |
| 1658029  | 852180.5 | [1032][M] <sup>+</sup>                        | 29  |
| 1459183  | 696220.8 |                                               | 208 |
| 63494.49 | 612372.9 |                                               | 173 |
| 635306.3 | 8612302  |                                               | 1   |
| 323944.5 | 766273   | [M+Na] <sup>+</sup>                           | 217 |
| 183763.1 | 320074.1 | [M+H+HCC]                                     | 262 |
| 1855087  | 2412270  |                                               | 429 |
| 2449045  | 227427.1 |                                               | 124 |
| 546744.9 | 969544.4 |                                               | 69  |
| 311630.4 | 208165.6 |                                               | 345 |
| 1.1E+09  | 1.48E+09 | [600][M+1] <sup>+</sup>                       | 4   |
| 90591.02 | 141458.5 |                                               | 44  |
| 105482.2 | 20141.26 | [289][M] <sup>2+</sup> [M+Na+K] <sup>2+</sup> | 47  |
| 31856.44 | 758779   | [814][M+1] <sup>+</sup>                       | 152 |
| 3343868  | 3490364  |                                               | 150 |

|          |          |                       |     |
|----------|----------|-----------------------|-----|
| 258875.9 | 285346.2 | [388][M+1]+           | 354 |
| 17834.29 | 120280.9 | [1393][M+1]+          | 264 |
| 608214.5 | 1105179  | [1572][M+1]+          | 70  |
| 3353766  | 808727   | [1548][M]+ [2M+H]+ 4! | 25  |
| 6606360  | 5585315  |                       | 411 |
| 4327254  | 3747096  |                       | 355 |
| 743931.7 | 815086.6 | [266][M+1]+           | 303 |
| 324354.1 | 320981.2 |                       | 104 |
| 12679316 | 8100653  | [333][M]+ [M+K+NH3    | 49  |
| 36450.8  | 109374.3 | [M+H]+ 31!            | 221 |
| 19113.63 | 2565314  |                       | 1   |
| 667579.5 | 231781.2 | [318][M]+             | 223 |
| 735721   | 900225.5 |                       | 121 |
| 3072451  | 4246583  |                       | 1   |
| 956408.8 | 464699.1 | [734][M+1]2+          | 62  |
| 228705.7 | 230047.7 |                       | 33  |
| 7069.657 | 513250.9 |                       | 152 |
| 5297024  | 5559251  | [1004][M+1]2+         | 334 |
| 2893502  | 5952028  | [758][M]+             | 314 |
| 689952   | 513314   |                       | 276 |
| 111687.8 | 8213.599 | [1451][M+1]+          | 29  |
| 2084037  | 1495530  | [1492][M+2]+          | 266 |
| 1189082  | 1633358  |                       | 1   |
| 1137275  | 826629.5 | [629][M+1]+           | 319 |
| 1719692  | 1213818  | [3M+H+K]2             | 188 |
| 22982657 | 19975752 |                       | 85  |
| 2044644  | 498849   |                       | 93  |
| 125043   | 14161.38 |                       | 62  |
| 268817.4 | 267284.3 | [M+K+HCO              | 26  |
| 681492   | 82152.37 | [M+H-H2O]             | 76  |
| 53591.45 | 74055.74 |                       | 333 |
| 5023954  | 10161163 | [1453][M+2]+          | 85  |
| 129732.3 | 88210.48 |                       | 66  |
| 42495.4  | 168950.7 |                       | 363 |
| 117201.1 | 110203.2 | [846][M+2]+           | 110 |
| 40431.11 | 2574021  |                       | 1   |
| 36040068 | 71434806 | [1397][M+1]+          | 64  |
| 11386461 | 29222577 | [555][M]2+            | 1   |
| 7172623  | 3061500  | [140][M]+             | 19  |
| 270481.7 | 5238460  | [1399][M]+ [M+K]+ 69! | 29  |
| 167068.4 | 566887.3 |                       | 142 |
| 628774   | 291347.7 | [M+Na]+ 3!            | 237 |
| 3.5E+09  | 10783098 | [602][M]+ [M+H]+ 40!  | 4   |
| 100714.7 | 138637.1 |                       | 35  |
| 262484.7 | 335984.2 |                       | 341 |
| 655322.4 | 574106.8 | [635][M]+             | 225 |
| 3918649  | 11445635 | [1299][M]+            | 12  |

|          |          |               |     |
|----------|----------|---------------|-----|
| 1499288  | 1717875  | [1016][M+1]+  | 115 |
| 651790.8 | 17579650 |               | 1   |
| 349145   | 26940.77 | [575][M+1]+   | 236 |
| 654974.8 | 1630723  | [1540][M+2]+  | 301 |
| 1.35E+08 | 30332039 |               | 7   |
| 3306231  | 1726076  | [161][M]+     | 179 |
| 372602.9 | 6463378  |               | 1   |
| 122169.1 | 5076936  |               | 1   |
| 81245.8  | 153987.6 | [1138][M+1]+  | 229 |
| 153414.4 | 33165    |               | 62  |
| 129127.3 | 5587085  |               | 1   |
| 5044078  | 11691488 | [1540][M]+    | 301 |
| 941836.1 | 477553.4 | [1493][M]+    | 11  |
| 232181.1 | 208316.9 | [M+H]+ 34:    | 116 |
| 1330406  | 3305370  | [1557][M]+    | 334 |
| 985607.8 | 842692.7 | [1459][M+1]2+ | 167 |
| 3223257  | 3021148  | [1186][M+1]2+ | 100 |
| 96075.24 | 555557.7 |               | 39  |
| 498611.2 | 1675165  |               | 315 |
| 603372.3 | 900856.3 | [1204][M+3]+  | 12  |
| 472417.6 | 8523490  |               | 1   |
| 12873302 | 64952670 |               | 91  |
| 347977.4 | 291844.3 |               | 135 |
| 1277395  | 3100011  | [1299][M+1]+  | 12  |
| 607684.8 | 723116.6 | [1100][M+1]2+ | 222 |
| 784451.8 | 11180277 |               | 1   |
| 646015.1 | 459304.7 |               | 268 |
| 123607.4 | 6862984  |               | 1   |
| 1132646  | 966758.3 | [1459][M]2+   | 167 |
| 7871932  | 7842826  | [458][M]+     | 313 |
| 453707.9 | 178938.2 |               | 114 |
| 731305.7 | 19439233 |               | 1   |
| 288320.6 | 200914.9 |               | 274 |
| 51573.22 | 46131.41 | [M+H-C4H8]    | 49  |
| 159567.2 | 638397.7 | [M+2K-H]+     | 49  |
| 4796381  | 649893.2 | [1065][M+1]+  | 252 |
| 33284.5  | 9347974  |               | 1   |
| 200852.3 | 200606.4 |               | 291 |
| 963640.8 | 23274463 | [1431][M]+    | 1   |
| 4885552  | 4639646  | [1471][M+1]+  | 175 |
| 31893.44 | 122752.9 | [M+H-CO]+     | 104 |
| 226652.6 | 122740.4 | [691][M+2]+   | 221 |
| 107232.8 | 1263633  | [M+K+NH3]     | 119 |
| 0        | 3562599  |               | 59  |
| 1239323  | 1067321  | [676][M]2+    | 266 |
| 134117.9 | 272880.2 | [671][M+1]+   | 283 |
| 1334527  | 1267804  | [M+Na+NH]     | 57  |

|          |          |                       |     |
|----------|----------|-----------------------|-----|
| 122344.8 | 128284.1 |                       | 88  |
| 550385.3 | 3383186  |                       | 6   |
| 668723.4 | 6365336  |                       | 1   |
| 1088383  | 2177018  | [1397][M+3]+          | 64  |
| 34435.72 | 4624301  |                       | 6   |
| 1821464  | 4156305  |                       | 407 |
| 911324.3 | 13326578 |                       | 1   |
| 3356117  | 12075817 |                       | 1   |
| 174213.6 | 1961313  |                       | 1   |
| 7473162  | 3728789  |                       | 80  |
| 1770067  | 3861004  |                       | 1   |
| 604843.3 | 1098153  | [733][M+1]+           | 71  |
| 630351.8 | 365747.1 | [311][M+1]+           | 300 |
| 26491.36 | 442712.1 | [118][M+1]2+          | 55  |
| 297550.2 | 128875.8 | [1032][M+1]+          | 29  |
| 128276.4 | 280790.5 |                       | 49  |
| 914535.8 | 24082457 |                       | 1   |
| 1045423  | 10454348 |                       | 1   |
| 761751.4 | 723425.4 |                       | 33  |
| 462269.2 | 11586285 |                       | 1   |
| 354500.9 | 1201962  | [1563][M+1]+          | 339 |
| 629781.7 | 800121.9 |                       | 170 |
| 0        | 6899727  |                       | 6   |
| 11098335 | 7609593  | [M+2H]2+ :            | 189 |
| 1509733  | 2895096  |                       | 72  |
| 461245.5 | 750902.8 | [M+H]+ 270            | 243 |
| 1695769  | 2155950  | [227][M+2]2+          | 29  |
| 35825.8  | 7929698  |                       | 6   |
| 66779.9  | 4175321  |                       | 1   |
| 72685829 | 86678114 | [1388][M+2]+          | 11  |
| 118320   | 360850.8 |                       | 61  |
| 706454.3 | 901263.7 | [1073][M]2+           | 442 |
| 271422.7 | 231660.6 |                       | 130 |
| 174635.4 | 411418.1 | [534][M+1]+           | 49  |
| 170714.7 | 448541.2 |                       | 41  |
| 1866569  | 999179.1 | [M+Na]+ 7!            | 25  |
| 1920160  | 2635757  |                       | 2   |
| 63894.57 | 44331133 | [299][M+2]+           | 103 |
| 1088243  | 25540847 | [1314][M+1]+          | 1   |
| 101329.9 | 68732.74 |                       | 324 |
| 11050009 | 13713762 | [490][M]+ [M+Na]+ 3!  | 66  |
| 0        | 254957.5 |                       | 104 |
| 979047   | 23389528 |                       | 1   |
| 172416.2 | 254773.1 | [M+H]+ 28:            | 104 |
| 6070415  | 9993871  | [1245][M]+ [2M+H]+ 3: | 4   |
| 949474.5 | 1234793  | [882][M+2]+           | 119 |
| 244541   | 129497.7 | [M+2H-CO]             | 104 |



|          |          |                       |     |
|----------|----------|-----------------------|-----|
| 252481.5 | 414989.2 |                       | 73  |
| 499990.1 | 471971.6 | [127][M+1]+           | 76  |
| 1342560  | 150153.2 | [575][M+2]+           | 236 |
| 928568.9 | 8224197  |                       | 1   |
| 140060.6 | 1769951  | [2M+H+K]2             | 95  |
| 565207.1 | 2847721  | [720][M]+ [M+H]+ 43!  | 49  |
| 933357.6 | 1355606  | [556][M+1]2+          | 85  |
| 1399572  | 1801030  | [683][M]2+ [M+2H]2+ ! | 101 |
| 100043.1 | 239287.2 |                       | 52  |
| 2605268  | 2433333  | [363][M+1]2+          | 18  |
| 11539741 | 15815596 |                       | 232 |
| 1018756  | 1051094  |                       | 114 |
| 533820.8 | 9030898  |                       | 1   |
| 173850.2 | 53371.72 |                       | 170 |
| 4315229  | 5307679  |                       | 6   |
| 11775.46 | 214156.5 | [M+H-C3H2             | 199 |
| 187145   | 236295.2 | [M+Na]+ 2!            | 55  |
| 485375.2 | 14797887 | [1279][M+1]2+         | 1   |
| 5840507  | 4614994  |                       | 211 |
| 94828.33 | 146735.4 |                       | 26  |
| 842983.9 | 4438635  | [M+Na]+ 4!            | 11  |
| 91258.87 | 45377.72 | [M+K+CF3C             | 116 |
| 951382.2 | 23470925 | [374][M+1]2+          | 1   |
| 1848971  | 2353518  | [186][M+2]+           | 18  |
| 430876.2 | 7637909  |                       | 1   |
| 10438029 | 9443504  | [1217][M+1]+          | 75  |
| 52183936 | 1.08E+08 | [1288][M+1]+          | 1   |
| 617699.6 | 4730820  | [400][M]+             | 103 |
| 206582.8 | 136234.1 |                       | 104 |
| 1808739  | 889158.7 | [734][M]2+            | 62  |
| 1246312  | 3132666  | [1550][M+1]+          | 312 |
| 831475.8 | 6977413  | [33][M+1]3+           | 1   |
| 863790.4 | 2726579  |                       | 61  |
| 21111771 | 12714633 | [1342][M]+ [M+H]+ 69! | 25  |
| 417641.1 | 606800.6 | [564][M+3]+           | 217 |
| 149407.8 | 14400.76 | [303][M+2]+           | 51  |
| 613243.5 | 6490163  |                       | 1   |
| 331733.5 | 888935.4 | [3M+Na+K]             | 289 |
| 93255.43 | 6013457  | [M+H]+ 49!            | 29  |
| 245932.6 | 5668486  |                       | 69  |
| 131891.6 | 155406.6 |                       | 306 |
| 824424.6 | 720355.2 |                       | 329 |
| 830782.2 | 1278353  | [381][M+1]2+          | 231 |
| 237487.7 | 613992.8 | [561][M+1]+           | 264 |
| 699382   | 303727.8 | [M+Na]+ 6!            | 29  |
| 4918640  | 13898138 | [906][M]+ [M+K+NH3    | 310 |
| 23420.28 | 4564931  |                       | 1   |

|          |          |                       |     |
|----------|----------|-----------------------|-----|
| 722645.4 | 572709.8 |                       | 17  |
| 524975.2 | 948581.8 | [M+Na]+ 2:            | 104 |
| 10604152 | 22379426 | [362][M]3+            | 1   |
| 219038.7 | 9971842  |                       | 6   |
| 450498.6 | 136745.6 | [2M+Na+K]             | 60  |
| 331322.7 | 369661.3 |                       | 94  |
| 2.89E+09 | 3.33E+08 |                       | 6   |
| 439558.6 | 559187.1 | [1214][M+3]+          | 73  |
| 0        | 4969254  |                       | 6   |
| 2895340  | 21521736 |                       | 1   |
| 1155162  | 1233906  | [2M+H]+ 2:            | 104 |
| 776653.4 | 470030.9 | [790][M+1]+           | 104 |
| 2999353  | 2958909  | [M+Na]+ 1:            | 104 |
| 35853.66 | 4919431  |                       | 1   |
| 8945223  | 32373440 | [1026][M]+            | 226 |
| 15345204 | 30526068 |                       | 1   |
| 303433.2 | 32705.63 |                       | 110 |
| 406935.1 | 8003624  |                       | 1   |
| 0        | 5003648  |                       | 6   |
| 623919.1 | 731323.7 |                       | 149 |
| 1.02E+08 | 2.28E+08 | [1333][M]+            | 56  |
| 224238.1 | 2298127  |                       | 1   |
| 816472.1 | 821366.1 | [482][M+1]3+          | 442 |
| 2278167  | 2105708  |                       | 334 |
| 474158.5 | 1305667  |                       | 16  |
| 290868.4 | 240677.7 | [1353][M+1]2+         | 195 |
| 75657.81 | 102989   |                       | 71  |
| 2696721  | 8228607  |                       | 7   |
| 35821.55 | 9817.188 |                       | 18  |
| 2100565  | 1804762  | [1211][M]2+           | 436 |
| 71858.44 | 2452985  |                       | 1   |
| 0        | 461184   |                       | 104 |
| 687540.9 | 1874758  | [1563][M]+ [M+H]+ 10: | 339 |
| 471339.5 | 3642841  |                       | 167 |
| 827152.9 | 922285.9 | [263][M+2]+           | 29  |
| 728587.2 | 214054.7 |                       | 304 |
| 1922178  | 1220088  |                       | 256 |
| 573597.3 | 506568   | [M+2K-H]+             | 29  |
| 362463   | 45477    |                       | 240 |
| 855706   | 660693.5 |                       | 174 |
| 999746.9 | 16508282 |                       | 1   |
| 824959.1 | 1399454  | [M+K]+ 18:            | 264 |
| 1758899  | 44225746 | [1279][M]2+           | 1   |
| 3649196  | 4097095  | [551][M]+             | 213 |
| 947844   | 100487   | [M+K+CF3C             | 110 |
| 13039.9  | 12672.06 | [M+H-CH3]             | 18  |
| 3017324  | 4269954  |                       | 12  |

|          |          |                     |     |
|----------|----------|---------------------|-----|
| 154789.8 | 4713705  |                     | 1   |
| 4802957  | 12977322 |                     | 72  |
| 1210862  | 2131891  |                     | 66  |
| 14442818 | 18539923 | [1360][M+2]2+       | 1   |
| 54458.59 | 4683931  |                     | 1   |
| 1198983  | 1584944  | [227][M+1]2+        | 29  |
| 1529739  | 32199618 |                     | 1   |
| 98799672 | 1.26E+08 | [480][M+1]+         | 4   |
| 0        | 635587.5 |                     | 152 |
| 217839.5 | 351179.3 |                     | 29  |
| 1093909  | 783916.4 | [90][M+1]+          | 52  |
| 818631.9 | 23641122 | [1356][M+1]2+       | 1   |
| 355107.6 | 20620073 |                     | 1   |
| 1269879  | 506539.8 | [M+Na]+ 5:          | 11  |
| 34686831 | 30555026 | [1295][M]+ [M+K+NH3 | 205 |
| 2527092  | 11301168 |                     | 7   |
| 174023   | 19483970 |                     | 1   |
| 694703.6 | 180939.8 | [1366][M+1]+        | 175 |
| 1962570  | 1022677  | [M+H]+ 65:          | 252 |
| 126811.9 | 520400.6 |                     | 49  |
| 1422771  | 1339479  | [780][M+2]+         | 115 |
| 777450.9 | 831981.2 | [1495][M]+          | 139 |
| 214785.3 | 568662.8 | [1555][M+1]+        | 450 |
| 213250.1 | 3885402  |                     | 1   |
| 165471.9 | 196135.9 | [1449][M+1]+        | 443 |
| 5766754  | 332694.8 |                     | 124 |
| 2787649  | 52073403 |                     | 1   |
| 247028.5 | 199515.5 |                     | 244 |
| 889320.8 | 212137.2 | [M+Na]+ 3:          | 171 |
| 361284.6 | 297725.7 | [2M+Na+K]           | 26  |
| 14246671 | 1950266  | [1065][M]+          | 252 |
| 0        | 3660433  |                     | 1   |
| 1979872  | 29487660 |                     | 1   |
| 26523.54 | 472048.4 | [797][M+1]+         | 55  |
| 75377.2  | 7763023  |                     | 1   |
| 868324.6 | 668963.5 |                     | 188 |
| 2238537  | 2391923  |                     | 406 |
| 804241.2 | 1467125  | [M+H]+ 31:          | 4   |
| 430659   | 8068625  |                     | 1   |
| 37182.01 | 842241.5 | [M+K+CF3C           | 199 |
| 5634357  | 47399368 | [1445][M+3]+        | 1   |
| 248255.8 | 333378   |                     | 129 |
| 954213.2 | 15572167 |                     | 1   |
| 467930.8 | 10427662 |                     | 1   |
| 223257   | 103640.5 | [M+K]+ 33:          | 112 |
| 80825.63 | 188639.6 |                     | 105 |
| 4629950  | 585829.1 | [912][M+1]+         | 212 |

|          |          |               |     |
|----------|----------|---------------|-----|
| 107347   | 33193.36 | [M+2Na-H]     | 76  |
| 503584.3 | 1351163  |               | 72  |
| 268513.2 | 7902362  |               | 1   |
| 91650.61 | 211563.6 | [M+K]+ 378    | 238 |
| 1143221  | 37287274 |               | 1   |
| 700293.7 | 22313871 |               | 1   |
| 158732.7 | 4329246  |               | 1   |
| 4871997  | 3900826  | [2M+Na]+ :    | 213 |
| 106277.7 | 9078105  |               | 6   |
| 205455.6 | 1129875  | [1474][M+4]+  | 64  |
| 430496.8 | 2989690  |               | 1   |
| 106963.3 | 155529.7 |               | 49  |
| 800339.6 | 3596326  |               | 174 |
| 400256.1 | 19937270 |               | 1   |
| 2161026  | 4055187  |               | 356 |
| 808801.1 | 1003007  | [461][M+1]+   | 47  |
| 242801.6 | 526997.3 | [M+H-CO]+     | 289 |
| 472821.3 | 479755.3 | [503][M]+     | 93  |
| 1072397  | 3649963  | [985][M]+     | 226 |
| 120062.1 | 139020.8 | [M+Na]+ 5·    | 49  |
| 135623.2 | 220411.1 | [M+Na]+ 4·    | 49  |
| 89242.86 | 1375886  | [1359][M+3]+  | 1   |
| 2853496  | 6814950  | [1520][M]+    | 210 |
| 31659.65 | 3275994  |               | 1   |
| 962388   | 1122247  |               | 217 |
| 248243.7 | 33582.11 | [948][M]+     | 217 |
| 0        | 2869843  |               | 1   |
| 155064.6 | 4608743  |               | 1   |
| 16248891 | 6635015  | [1130][M+2]2+ | 18  |
| 28499223 | 2795941  |               | 198 |
| 16791055 | 44994221 |               | 1   |
| 1587444  | 793566.4 |               | 227 |
| 3283526  | 1328107  |               | 295 |
| 961389.6 | 632166.6 | [1413][M+1]+  | 17  |
| 311413.1 | 1119473  |               | 23  |
| 1087334  | 1222268  | [1516][M+1]+  | 32  |
| 5541931  | 9013123  |               | 1   |
| 2543899  | 5786460  | [555][M+1]2+  | 1   |
| 9418055  | 10730885 | [576][M]+     | 2   |
| 1475420  | 50913381 |               | 1   |
| 5119603  | 64870688 |               | 1   |
| 8366163  | 25566807 | [1475][M]+    | 248 |
| 1646502  | 530981.6 |               | 362 |
| 292072.7 | 409260.1 |               | 231 |
| 139106.1 | 211094.8 | [M+3H]3+ !    | 144 |
| 171678.9 | 74434.07 |               | 380 |
| 1098570  | 1204197  | [470][M]+     | 415 |

|          |          |                     |     |
|----------|----------|---------------------|-----|
| 57360.67 | 153331.1 |                     | 457 |
| 484598.5 | 7666621  |                     | 1   |
| 7342601  | 8617222  | [358][M+1]+         | 4   |
| 125970.7 | 48148.34 | [679][M+1]2+        | 134 |
| 12977033 | 12880877 | [1566][M+1]+        | 11  |
| 653718.7 | 142256.1 | [1451][M]+ [M+Na+HC | 29  |
| 7150.713 | 162531.4 |                     | 409 |
| 2434316  | 1736312  | [1446][M+1]+        | 47  |
| 115455.4 | 3419360  | [2M+Na]+ :          | 289 |
| 1256082  | 32618843 |                     | 1   |
| 1127489  | 806393.7 |                     | 149 |
| 997125.9 | 22093339 |                     | 1   |
| 1046158  | 2419186  | [1546][M]+          | 429 |
| 979692.3 | 433399.5 | [830][M]+           | 35  |
| 89283.21 | 6625511  |                     | 1   |
| 102679.1 | 5368428  | [M+K+CF3C           | 199 |
| 62356384 | 58456869 | [1418][M]+          | 134 |
| 1156424  | 2060935  | [M+Na]+ 7!          | 8   |
| 1344551  | 23310002 |                     | 1   |
| 156795.9 | 471098.5 |                     | 354 |
| 768869.5 | 1168991  |                     | 407 |
| 837492.9 | 5170928  |                     | 11  |
| 328656.1 | 678378.9 | [M+Na+CF:           | 289 |
| 101759.9 | 5786002  |                     | 1   |
| 140750.1 | 4162265  |                     | 1   |
| 1046864  | 810530   | [M+Na]+ 3!          | 244 |
| 472528.7 | 999018.2 | [1507][M]+          | 113 |
| 397653.4 | 710239.1 |                     | 70  |
| 662484.8 | 9014038  |                     | 1   |
| 237927.7 | 106610.7 |                     | 433 |
| 2089991  | 32089742 |                     | 1   |
| 600134   | 1374716  | [1555][M]+          | 450 |
| 1674879  | 1935181  |                     | 105 |
| 4945219  | 1000342  |                     | 287 |
| 3224998  | 1633866  | [M+Na]+ 4:          | 319 |
| 590691.5 | 131369   | [M+2K-H]+           | 213 |
| 3766934  | 3214360  | [M+H]+ 28!          | 237 |
| 934387.6 | 1102541  |                     | 11  |
| 525767   | 23608442 | [1558][M+1]2+       | 6   |
| 388951.3 | 132133.6 | [857][M+2]+         | 151 |
| 1358582  | 2300498  | [M+2K-H]+           | 86  |
| 1946276  | 3505041  | [1241][M]+          | 10  |
| 402906.1 | 475625.6 |                     | 170 |
| 36215753 | 85863403 | [1333][M+1]+        | 56  |
| 4520627  | 42133217 | [730][M+1]+         | 9   |
| 1006075  | 3388136  |                     | 8   |
| 144149.2 | 2403956  | [M+K]+ 72:          | 47  |

|          |          |                       |     |
|----------|----------|-----------------------|-----|
| 630946.6 | 52410.73 | [M+H-CH3]             | 60  |
| 291323.1 | 15741199 |                       | 6   |
| 1394790  | 1945641  |                       | 11  |
| 2747373  | 2119601  | [1250][M]+            | 338 |
| 61783    | 26865.39 | [1157][M+1]+          | 300 |
| 830117.5 | 883389.2 |                       | 70  |
| 6955854  | 8920922  | [323][M]+ [M+H]+ 320  | 11  |
| 22079336 | 9931046  | [886][M]+             | 62  |
| 1446470  | 1529422  | [M+H-C3H2]            | 312 |
| 1456228  | 1449843  | [274][M]2+ [M+2K]2+ 5 | 118 |
| 845866.3 | 684151.1 | [611][M+1]+           | 211 |
| 80317.33 | 83955.4  |                       | 77  |
| 867087   | 1470425  | [1526][M+1]+          | 144 |
| 70537.96 | 140369.3 |                       | 398 |
| 1277628  | 1019071  |                       | 188 |
| 4729587  | 77483331 |                       | 1   |
| 195612   | 884962.6 |                       | 26  |
| 1558388  | 1487855  | [847][M+1]+           | 147 |
| 19357228 | 20564139 | [184][M]+ [M+H-H2O]   | 27  |
| 485140.3 | 1209754  | [1546][M+1]+          | 429 |
| 153277.9 | 181587.6 |                       | 62  |
| 1609665  | 15720375 |                       | 1   |
| 284418.1 | 140515.7 | [M+K]+ 350            | 64  |
| 38723.55 | 3778202  |                       | 6   |
| 1163329  | 2712727  | [M+K]+ 440            | 310 |
| 79283.73 | 137162.2 |                       | 55  |
| 6778986  | 4895366  | [1446][M]+ [M+K]+ 730 | 47  |
| 1123731  | 3416153  | [906][M+1]+           | 310 |
| 3484377  | 4003097  | [461][M]+             | 47  |
| 125775.3 | 4787037  |                       | 1   |
| 416186   | 659322.4 |                       | 167 |
| 1466768  | 1227704  | [M+2H]2+ 1            | 339 |
| 2528944  | 61079482 | [1276][M]2+           | 6   |
| 2004412  | 58293188 | [1276][M+1]2+         | 6   |
| 5846610  | 7229844  |                       | 200 |
| 902931.7 | 181613.8 | [2M+Na+K]             | 23  |
| 320036.9 | 53881.55 |                       | 24  |
| 2043617  | 5786387  |                       | 389 |
| 1869679  | 632199.8 | [M+Na+HC]             | 199 |
| 754936.1 | 739162.2 |                       | 70  |
| 188750.3 | 5577675  |                       | 6   |
| 1193944  | 6263050  |                       | 1   |
| 297021.9 | 542679.5 |                       | 69  |
| 21774072 | 1.28E+08 | [478][M+2]+           | 1   |
| 44134381 | 1.79E+08 | [1398][M]+            | 1   |
| 279596   | 676458.4 | [1436][M+1]+          | 129 |
| 717639.3 | 2348232  | [1475][M+2]+          | 248 |

|          |          |              |     |
|----------|----------|--------------|-----|
| 871538.9 | 630671.6 |              | 456 |
| 479263.7 | 372449.3 | [716][M+1]+  | 24  |
| 533870.2 | 12257148 |              | 1   |
| 368890.6 | 799807.1 |              | 117 |
| 2597107  | 2110046  | [204][M]+    | 231 |
| 491027   | 334432.3 |              | 285 |
| 5972550  | 7622854  |              | 174 |
| 16966.37 | 371823.7 |              | 137 |
| 2465850  | 50317396 | [474][M]+    | 1   |
| 2550408  | 2197548  | [1337][M+1]+ | 227 |
| 1203322  | 30621178 |              | 1   |
| 224125.8 | 485976.4 | [659][M+2]+  | 41  |
| 856670   | 12245895 |              | 1   |
| 1415889  | 1913903  | [181][M+1]+  | 29  |
| 1864676  | 3054129  | [980][M+2]+  | 11  |
| 706811.8 | 1655991  | [1436][M]+   | 129 |
| 649545   | 394849.6 |              | 100 |
| 797717.8 | 17499412 |              | 1   |
| 24671300 | 1.47E+08 | [1571][M]+   | 7   |
| 3515907  | 26305762 | [1356][M]2+  | 1   |
| 3201646  | 10608077 | [1475][M+1]+ | 248 |
| 439380   | 523537.1 | [786][M+2]2+ | 29  |
| 632665.2 | 1175529  | [777][M+1]2+ | 210 |
| 58879.51 | 151256.6 |              | 113 |
| 179837.7 | 17026690 | [1558][M]2+  | 6   |
| 1233365  | 1550505  | [490][M+1]+  | 66  |
| 1612758  | 1585541  | [405][M+1]+  | 245 |
| 756297.1 | 10613179 |              | 1   |
| 1980092  | 8952786  | [M+H]+ 34:   | 178 |
| 2009696  | 48203857 |              | 1   |
| 625558.6 | 19180006 | [1328][M+1]+ | 1   |
| 307727.7 | 782257   |              | 41  |
| 2642144  | 2995635  |              | 57  |
| 1963264  | 40488831 |              | 1   |
| 10978829 | 7603844  |              | 1   |
| 127691.5 | 168741.2 |              | 114 |
| 8845449  | 10090534 |              | 1   |
| 5760033  | 20147357 |              | 1   |
| 675187.9 | 679181.5 |              | 37  |
| 465114.4 | 899202.8 | [332][M]2+   | 107 |
| 1780052  | 1396117  | [846][M+1]+  | 110 |
| 233575   | 2661289  |              | 1   |
| 1791785  | 1391241  | [933][M+1]3+ | 249 |
| 368307.1 | 683471.7 | [1363][M+1]+ | 70  |
| 71013.89 | 165000.5 | [168][M+1]+  | 245 |
| 342210.8 | 793995.2 |              | 207 |
| 693805.8 | 424641.3 | [235][M+2]+  | 40  |

|          |          |                      |     |
|----------|----------|----------------------|-----|
| 779324.5 | 533797.9 | [558][M+2]+          | 254 |
| 401131.7 | 22613.86 | [1548][M+2]+         | 25  |
| 1289118  | 1557884  |                      | 105 |
| 719560.9 | 866265   |                      | 377 |
| 940749.3 | 929949.1 |                      | 54  |
| 2551004  | 7292280  | [415][M+2]2+         | 1   |
| 603349.4 | 1847073  |                      | 372 |
| 13344519 | 48579787 | [1438][M]+           | 123 |
| 533074   | 1573524  |                      | 2   |
| 146796.1 | 289259.2 |                      | 101 |
| 85129.32 | 3126945  | [M+K]+ 74            | 31  |
| 292300.6 | 2940164  |                      | 1   |
| 1155717  | 2151262  |                      | 190 |
| 969931.7 | 21177237 | [1327][M+1]+         | 1   |
| 658804.1 | 166943.4 | [M+K+NH3             | 23  |
| 1649810  | 2778515  |                      | 1   |
| 831475.8 | 9007687  |                      | 1   |
| 1758704  | 5759388  |                      | 1   |
| 558925.9 | 1213685  |                      | 389 |
| 2043432  | 11333163 | [M+K+NaCl            | 8   |
| 548554.5 | 686342.6 |                      | 11  |
| 2031252  | 3000892  | [1245][M+1]+         | 4   |
| 35749003 | 2.37E+08 |                      | 6   |
| 142405.6 | 87654.29 |                      | 93  |
| 40437.87 | 12556.58 | [M+H+HCC             | 34  |
| 1101242  | 12273019 |                      | 6   |
| 412620.2 | 2151512  | [1258][M+3]+         | 45  |
| 2555494  | 18508371 | [1571][M+2]+         | 7   |
| 15442641 | 1967664  | [912][M]+            | 212 |
| 3586475  | 1495490  | [M+Na]+ 3            | 86  |
| 4324237  | 1925260  | [1486][M+1]+         | 11  |
| 888207.5 | 21960268 |                      | 1   |
| 1367582  | 9635557  |                      | 1   |
| 276583.2 | 529017.1 | [M+H-HCO             | 104 |
| 1252152  | 3230394  | [1520][M+1]+         | 210 |
| 119879.4 | 180476.4 |                      | 364 |
| 1636613  | 1837160  | [M+Na]+ 3            | 177 |
| 508978.7 | 7201403  |                      | 1   |
| 6329415  | 29736796 | [808][M]2+           | 11  |
| 14696900 | 14765422 | [230][M]+ [M+Na]+ 2  | 16  |
| 2056703  | 2971790  | [669][M]2+ [M+2H]2+  | 137 |
| 88700.35 | 1501539  |                      | 152 |
| 6192052  | 5449010  | [2M+H]+ 2            | 112 |
| 987807.5 | 17210786 |                      | 1   |
| 576872.1 | 907303.1 | [683][M+1]2+         | 101 |
| 558946.2 | 161427.7 |                      | 191 |
| 2167288  | 3452516  | [1497][M]+ [M+H-COCl | 11  |



|          |          |                     |     |
|----------|----------|---------------------|-----|
| 284426.6 | 19694915 |                     | 1   |
| 413299.4 | 208108.9 |                     | 246 |
| 1012653  | 991524.6 |                     | 151 |
| 119472.1 | 98748.94 | [503][M+1]+         | 93  |
| 92672.29 | 12772476 |                     | 6   |
| 151873.9 | 353985.7 |                     | 348 |
| 406354.3 | 661756.3 |                     | 111 |
| 313391.3 | 568164.5 |                     | 49  |
| 3231039  | 21143145 |                     | 1   |
| 777728.4 | 653549.7 | [578][M]2+          | 104 |
| 1628344  | 3063518  | [M+H]+ 71           | 64  |
| 1144603  | 3661400  | [1272][M]+          | 26  |
| 7766482  | 5472705  | [846][M]+           | 110 |
| 261425   | 151271.7 | [821][M+1]+         | 199 |
| 385000.4 | 1223081  | [M+K+CF3C           | 240 |
| 623608.6 | 4945718  |                     | 4   |
| 413777.9 | 103403.1 | [M+H+HCC            | 18  |
| 169240.8 | 61602.13 | [830][M+1]+         | 35  |
| 298186.2 | 12318706 |                     | 6   |
| 2651910  | 3351106  | [423][M+1]2+        | 1   |
| 98486.02 | 50508.89 | [1043][M+1]+        | 41  |
| 734620.9 | 945399.1 |                     | 176 |
| 104627.2 | 6482085  |                     | 1   |
| 79828.15 | 888964.7 | [462][M+1]+         | 104 |
| 3548270  | 329845.7 | [950][M]+           | 47  |
| 4279726  | 10560150 |                     | 28  |
| 1123858  | 31765268 |                     | 1   |
| 575612.4 | 10388316 |                     | 1   |
| 1060758  | 883321.8 | [558][M+1]+         | 254 |
| 438775.7 | 10400076 |                     | 1   |
| 8970363  | 1.06E+08 |                     | 1   |
| 53166.6  | 3418855  |                     | 6   |
| 103642.3 | 118274.4 | [2M+H+K]2           | 27  |
| 217352.5 | 17909837 |                     | 6   |
| 266945.4 | 12851318 |                     | 6   |
| 654893   | 246262.4 | [M+H-H2O]           | 29  |
| 171548.5 | 219047.3 |                     | 248 |
| 6995279  | 3930048  | [329][M]+ [M+H+NH3  | 16  |
| 147321.4 | 11471103 |                     | 6   |
| 1208090  | 30681543 |                     | 1   |
| 15778768 | 1.63E+08 |                     | 1   |
| 737773.8 | 954534.4 | [395][M+1]+         | 11  |
| 717978.9 | 15496499 |                     | 1   |
| 124331.9 | 1646676  |                     | 1   |
| 32048240 | 45943206 | [253][M]+ [M+H]+ 30 | 119 |
| 152741.3 | 11380066 |                     | 6   |
| 239809.2 | 1373260  |                     | 264 |

|          |          |                       |     |
|----------|----------|-----------------------|-----|
| 0        | 5384627  |                       | 1   |
| 1914436  | 26683659 |                       | 1   |
| 3779186  | 8241429  | [402][M]+             | 105 |
| 172072.8 | 72793.96 | [M+2H-CH:             | 23  |
| 3.06E+08 | 277177.5 |                       | 19  |
| 1727245  | 2064757  | [1074][M]+            | 360 |
| 121931.7 | 830345.9 |                       | 225 |
| 811636.9 | 10495357 |                       | 1   |
| 2655749  | 2803852  | [184][M+1]+           | 27  |
| 314287.5 | 104990.8 |                       | 300 |
| 2532788  | 8078077  |                       | 2   |
| 0        | 4865466  |                       | 1   |
| 12861675 | 66963356 | [1571][M+1]+          | 7   |
| 1661221  | 10022316 | [594][M+1]+           | 49  |
| 188989.7 | 195399.4 |                       | 330 |
| 479209.3 | 875003.5 | [228][M+1]+           | 25  |
| 762821.4 | 13277494 |                       | 1   |
| 1.44E+08 | 2.24E+08 | [553][M+1]+           | 9   |
| 31090.53 | 760105   |                       | 190 |
| 1164244  | 63136.14 | [950][M+1]+           | 47  |
| 1331733  | 1874644  |                       | 11  |
| 172401.9 | 126924.8 | [700][M]+             | 62  |
| 14492.45 | 18696.78 |                       | 263 |
| 227638.2 | 23924.01 |                       | 62  |
| 96511.3  | 88670.52 |                       | 149 |
| 375397.6 | 527138.6 | [1530][M+4]+          | 100 |
| 99547.6  | 14319190 |                       | 1   |
| 1288441  | 23265162 |                       | 1   |
| 1176669  | 17663711 |                       | 55  |
| 3366730  | 5614010  | [313][M]2+ [M+2K]2+ : | 60  |
| 4157975  | 2539472  | [M+K]+ 35'            | 319 |
| 2066421  | 487831.9 |                       | 385 |
| 414615   | 83129.73 | [1427][M+1]+          | 29  |
| 132273.8 | 14437445 |                       | 6   |
| 19392.25 | 3017384  |                       | 1   |
| 699706.2 | 1138718  | [1241][M+1]+          | 10  |
| 9075572  | 15416459 |                       | 103 |
| 19492.55 | 75498.47 |                       | 62  |
| 6592832  | 18099333 | [1333][M+2]+          | 56  |
| 286208.7 | 15558670 |                       | 1   |
| 147471.6 | 213241.8 |                       | 186 |
| 1001722  | 21965648 |                       | 1   |
| 1056489  | 7156153  |                       | 1   |
| 300137.6 | 14076921 |                       | 6   |
| 12230707 | 32788415 |                       | 1   |
| 2142575  | 7174988  | [M+H+HCC              | 4   |
| 1884996  | 38427753 |                       | 1   |

|          |          |                       |     |
|----------|----------|-----------------------|-----|
| 3287431  | 159434.1 |                       | 63  |
| 2015056  | 53370677 | [1314][M]+            | 1   |
| 5861244  | 77709195 | [372][M]2+            | 1   |
| 865101.5 | 25471586 |                       | 1   |
| 37830.46 | 55331.62 |                       | 104 |
| 2624423  | 5071078  |                       | 1   |
| 6036.624 | 497809.1 |                       | 95  |
| 106273.2 | 9765515  |                       | 1   |
| 5449120  | 5468921  | [1007][M+1]+          | 75  |
| 346705.9 | 15602.45 |                       | 375 |
| 15718948 | 70359035 | [1373][M]+ [M+K+NH3   | 150 |
| 17292176 | 374482.7 | [861][M]+ [M+K]+ 44:  | 244 |
| 1658118  | 963163.1 | [270][M+2]+           | 16  |
| 2023302  | 3987822  |                       | 54  |
| 5349482  | 69556148 |                       | 80  |
| 185877.1 | 7743499  |                       | 6   |
| 542406.2 | 1164352  | [758][M+1]+           | 314 |
| 4642730  | 1984316  |                       | 66  |
| 268603   | 580630.6 | [529][M+1]3+          | 322 |
| 153465.6 | 778950   | [3M+H+Na              | 239 |
| 2756919  | 2608361  | [971][M]+ [M+H]+ 51:  | 88  |
| 412158.9 | 3422651  |                       | 1   |
| 148791.9 | 70129.23 | [M+K]+ 21:            | 232 |
| 1328774  | 16683226 |                       | 1   |
| 4875549  | 20929998 | [1438][M+1]+          | 123 |
| 621054.2 | 17498059 | [447][M]2+            | 1   |
| 130864.7 | 200623.5 | [M+H]+ 59:            | 49  |
| 563309   | 216018.3 | [M+Na]+ 2:            | 277 |
| 303729.5 | 1430527  |                       | 64  |
| 174462.2 | 84416.84 |                       | 442 |
| 1417911  | 18841200 | [1200][M]+            | 1   |
| 0        | 2572344  |                       | 1   |
| 293822   | 435193   |                       | 70  |
| 3802503  | 3701906  |                       | 91  |
| 8307185  | 6154217  | [1181][M]+ [M+Na]+ 5: | 17  |
| 0        | 3433810  | [M+Na]+ 2:            | 180 |
| 458883.8 | 11147868 |                       | 1   |
| 31781708 | 2.26E+08 |                       | 1   |
| 5185232  | 69349817 |                       | 1   |
| 1269462  | 1176541  |                       | 31  |
| 250589   | 372085.8 | [M+H]+ 37:            | 31  |
| 1124513  | 9729993  |                       | 209 |
| 6.22E+08 | 7.68E+08 | [1388][M]+ [2M+H]+ 3: | 11  |
| 219545.4 | 4895435  |                       | 1   |
| 2241206  | 8920045  | [1026][M+1]+          | 226 |
| 94797.45 | 270367.1 | [M+H+NH3              | 49  |
| 399974.6 | 12593416 |                       | 6   |

|          |          |                                              |     |
|----------|----------|----------------------------------------------|-----|
| 461233   | 119223.4 | [1097][M] <sup>2</sup> [2M+2Na+]             | 29  |
| 819844.1 | 14106828 |                                              | 1   |
| 445031.5 | 333582.4 | [2M+Na+3I                                    | 11  |
| 1020664  | 15474508 |                                              | 1   |
| 259576.6 | 616826.9 |                                              | 105 |
| 190354.8 | 2337005  |                                              | 1   |
| 21894.47 | 5534225  |                                              | 1   |
| 771595   | 1092770  |                                              | 233 |
| 293049.9 | 6891969  | [1200][M+1] <sup>+</sup>                     | 1   |
| 19372589 | 94173595 | [594][M] <sup>+</sup> [M+K] <sup>+</sup> 36: | 49  |
| 1301623  | 423968.2 | [1427][M] <sup>+</sup>                       | 29  |
| 16326111 | 25445996 | [1313][M+1] <sup>+</sup>                     | 1   |
| 1447159  | 4585050  |                                              | 1   |
| 812879   | 19110552 |                                              | 1   |
| 277076.2 | 545363.6 | [M+2H] <sup>2+</sup> ,                       | 217 |
| 98846.49 | 115919.2 |                                              | 41  |
| 2038122  | 2964034  |                                              | 402 |
| 920877.1 | 14161793 |                                              | 1   |
| 259601.4 | 3681712  |                                              | 1   |
| 1632191  | 26330932 |                                              | 1   |
| 2.84E+08 | 3.48E+08 | [1388][M+1] <sup>+</sup>                     | 11  |
| 93451047 | 2.62E+08 | [1258][M] <sup>+</sup>                       | 45  |
| 768118.9 | 4025048  |                                              | 1   |
| 1243659  | 291249   |                                              | 319 |
| 32430.91 | 6292407  |                                              | 6   |
| 306715.1 | 151807.6 | [M+Na] <sup>+</sup> 5'                       | 47  |
| 4240043  | 4657009  | [1566][M+2] <sup>+</sup>                     | 11  |
| 2315404  | 56941766 |                                              | 1   |
| 331644.7 | 2404119  |                                              | 306 |
| 864088.9 | 1159815  |                                              | 37  |
| 27867.95 | 1948201  | [1198][M+1] <sup>+</sup>                     | 1   |
| 798768.8 | 8876173  |                                              | 1   |
| 2669901  | 33658708 |                                              | 1   |
| 218241.5 | 193006.3 | [136][M+1] <sup>+</sup>                      | 105 |
| 1848486  | 2422714  | [612][M] <sup>+</sup>                        | 269 |
| 13673310 | 58443065 | [1151][M] <sup>+</sup> [M+K+NH <sub>3</sub>  | 168 |
| 456746.9 | 5335338  | [1431][M+2] <sup>+</sup>                     | 1   |
| 561547   | 16604901 |                                              | 1   |
| 17404008 | 84038416 | [1306][M] <sup>+</sup>                       | 125 |
| 1.31E+08 | 2.25E+08 | [86][M] <sup>+</sup>                         | 4   |
| 709112.3 | 8207218  |                                              | 1   |
| 831624.6 | 1114682  |                                              | 37  |
| 5631815  | 27324380 | [1373][M+1] <sup>+</sup>                     | 150 |
| 121749.5 | 2293855  | [M+K] <sup>+</sup> 21:                       | 133 |
| 2000431  | 463134.2 | [M+Na+Na                                     | 40  |
| 1297061  | 27045025 |                                              | 1   |
| 3170782  | 2285181  | [862][M+1] <sup>2+</sup>                     | 257 |

|          |          |                      |     |
|----------|----------|----------------------|-----|
| 1084155  | 838013.3 | [878][M]+            | 33  |
| 1083595  | 3319914  | [M+K]+ 420           | 4   |
| 519467.3 | 552943.8 |                      | 287 |
| 356090.4 | 1592867  |                      | 39  |
| 9380045  | 4376728  | [34][M]+ [M+H-CH4]   | 104 |
| 932751.5 | 948090.6 |                      | 25  |
| 1396612  | 1562400  |                      | 253 |
| 1681204  | 16272897 | [423][M]2+           | 1   |
| 32782.86 | 282078.7 | [M+Na+Na             | 95  |
| 5300252  | 6099787  | [M+2H]2+ !           | 252 |
| 1737456  | 1413697  | [M+H]+ 270           | 116 |
| 239108.7 | 88923.53 |                      | 107 |
| 1008062  | 30002105 |                      | 1   |
| 52443359 | 45695593 | [1176][M]+ [M+2K-H]+ | 29  |
| 62525.31 | 1990158  | [M+H]+ 430           | 144 |
| 919252.7 | 21588661 |                      | 1   |
| 3951982  | 4571387  | [M+K]+ 360           | 284 |
| 110423.4 | 1819822  | [M+K+CF30            | 90  |
| 10518317 | 10796680 | [628][M]+            | 174 |
| 896818.9 | 609308.8 |                      | 104 |
| 6060783  | 1.16E+08 |                      | 1   |
| 536444.9 | 3732745  | [729][M+1]+          | 49  |
| 2019393  | 1310892  | [70][M]+             | 116 |
| 299928.4 | 208014.4 | [1072][M+1]+         | 176 |
| 3789051  | 35442883 |                      | 1   |
| 990504.9 | 1104003  |                      | 317 |
| 585291.6 | 757516.3 | [370][M+1]+          | 35  |
| 21838750 | 25746286 | [117][M+1]+          | 4   |
| 186980.5 | 323621   |                      | 77  |
| 779397.4 | 26807442 |                      | 1   |
| 276363.3 | 7488201  |                      | 1   |
| 611738.2 | 17158669 |                      | 1   |
| 410011.3 | 264533.5 |                      | 356 |
| 2692676  | 5474976  |                      | 174 |
| 533813.9 | 1993797  |                      | 1   |
| 0        | 5377975  |                      | 1   |
| 740614.9 | 1338908  | [413][M]2+           | 138 |
| 203307.7 | 2129077  |                      | 24  |
| 59280521 | 48342279 |                      | 191 |
| 1562965  | 1913261  |                      | 179 |
| 100778.2 | 34479.19 | [1301][M+1]+         | 34  |
| 879385.1 | 2329252  | [1333][M+3]+         | 56  |
| 505046.8 | 1327282  |                      | 70  |
| 60234.17 | 276257.3 | [106][M+3]+          | 49  |
| 31369702 | 94085704 | [1258][M+1]+         | 45  |
| 539324.1 | 12529697 | [412][M+1]+          | 1   |
| 1636796  | 51378675 |                      | 1   |

|          |          |                       |     |
|----------|----------|-----------------------|-----|
| 0        | 4216945  |                       | 1   |
| 553986.5 | 4777149  |                       | 6   |
| 2591445  | 3065139  | [1345][M]+            | 53  |
| 2261870  | 2042211  | [136][M]+             | 105 |
| 463262.6 | 381918.7 |                       | 466 |
| 5120095  | 8619710  | [1126][M]+            | 17  |
| 368375.9 | 2806111  |                       | 49  |
| 180186.2 | 3188184  | [1201][M+1]+          | 1   |
| 2665504  | 2729937  | [15][M]+ [M+K]+ 15!   | 104 |
| 23243049 | 37198499 | [134][M]+ [M+K]+ 22!  | 119 |
| 1090640  | 10202644 |                       | 1   |
| 3032747  | 57689422 |                       | 1   |
| 308532.8 | 241211.3 |                       | 114 |
| 860158.5 | 1145157  |                       | 194 |
| 120958.6 | 139357.8 |                       | 151 |
| 2504599  | 5757007  | [1302][M]+            | 56  |
| 1490086  | 8085740  |                       | 1   |
| 1075980  | 2186491  | [684][M]+             | 245 |
| 2525563  | 2154755  | [356][M+1]+           | 18  |
| 2072970  | 20005144 |                       | 1   |
| 250379   | 64894.71 |                       | 27  |
| 256021.6 | 222257.3 | [M+Na]+ 1!            | 44  |
| 1328926  | 924166.7 | [M+Na+NH              | 276 |
| 332483.4 | 220533.7 |                       | 233 |
| 1621132  | 48240309 |                       | 1   |
| 510853.3 | 513731.5 |                       | 8   |
| 2591277  | 1306858  | [750][M+2]+           | 2   |
| 377833   | 198863.9 | [M+Na]+ 2!            | 298 |
| 960347.8 | 913925.8 | [M+H-C6H8             | 215 |
| 488533.2 | 9696776  |                       | 1   |
| 470383.4 | 7884757  |                       | 1   |
| 14139909 | 13360343 | [1125][M]+ [M+H-HCO   | 29  |
| 126320   | 170551.2 | [110][M+1]+           | 52  |
| 3770389  | 18759605 | [1151][M+1]+          | 168 |
| 16674076 | 79478046 | [1235][M]+            | 130 |
| 411302.8 | 289182.2 |                       | 54  |
| 2136004  | 1467249  | [719][M]2+ [M+2H]2+ : | 270 |
| 2233408  | 3227670  | [263][M+1]+           | 29  |
| 1424749  | 1784843  |                       | 348 |
| 5810002  | 30776254 | [1306][M+1]+          | 125 |
| 5153872  | 3666946  | [953][M]2+            | 260 |
| 1128689  | 1753653  |                       | 62  |
| 159863.7 | 160399.9 |                       | 70  |
| 2334980  | 8970625  |                       | 1   |
| 1350457  | 975669.1 |                       | 282 |
| 383582   | 82287.42 | [M+K]+ 52!            | 18  |
| 2234258  | 57953115 | [1392][M]+            | 1   |

|          |          |                       |     |
|----------|----------|-----------------------|-----|
| 5163982  | 18258290 | [1258][M+2]+          | 45  |
| 106232.6 | 271101.2 |                       | 328 |
| 851797.3 | 970481.6 |                       | 450 |
| 4913587  | 77270.35 | [861][M+1]+           | 244 |
| 12638672 | 5193610  | [1075][M]+            | 222 |
| 2567000  | 886506.3 | [959][M]+ [M+2Na-H]   | 60  |
| 404336   | 3349156  | [M+K+HCO              | 4   |
| 166211.8 | 167882.6 | [M+H-C6H8             | 96  |
| 2593799  | 55076557 |                       | 1   |
| 5205071  | 6925286  | [637][M]+             | 132 |
| 1400088  | 2197158  | [M+K]+ 330            | 23  |
| 191648.1 | 146398.1 | [M+H-CH3]             | 217 |
| 16065125 | 12786592 | [1176][M+1]+          | 29  |
| 5916012  | 77856829 | [374][M]2+            | 1   |
| 2020937  | 306262.9 |                       | 25  |
| 2257319  | 46524495 | [1327][M]+            | 1   |
| 4428531  | 35313129 |                       | 1   |
| 98806.68 | 77844.1  |                       | 273 |
| 155391   | 4488299  | [1558][M+2]+          | 6   |
| 3334572  | 5556180  | [218][M]2+ [M+2K]2+ 5 | 138 |
| 676338.3 | 377154.1 | [1517][M]+ [M+Na]+ 80 | 47  |
| 827547.8 | 5872648  |                       | 1   |
| 618118.8 | 843627.9 | [M+2H]2+ 0            | 47  |
| 6464619  | 1.16E+08 | [477][M]+             | 1   |
| 231168.2 | 271651.3 | [1405][M+2]+          | 100 |
| 84210.34 | 1040987  |                       | 69  |
| 271655.8 | 6457856  | [1431][M+1]+          | 1   |
| 144886.1 | 6994495  |                       | 1   |
| 74660.15 | 101854.4 |                       | 115 |
| 2658045  | 55327070 |                       | 1   |
| 714009.3 | 178329.5 | [3M+H+Na              | 75  |
| 5506594  | 7713338  | [1204][M+2]+          | 12  |
| 112551   | 209716   | [394][M+1]+           | 155 |
| 491697.7 | 2697350  |                       | 6   |
| 68773.67 | 467751.1 |                       | 290 |
| 1287345  | 3280539  | [M+2H-C4H             | 4   |
| 208358.2 | 599892.5 |                       | 283 |
| 563053.4 | 17205432 |                       | 1   |
| 3852872  | 4611424  | [840][M]2+            | 301 |
| 3881516  | 48328195 | [1201][M]+            | 1   |
| 1418600  | 3801197  |                       | 1   |
| 1326148  | 1142216  |                       | 54  |
| 817327.8 | 10639330 |                       | 1   |
| 81533289 | 2.68E+08 | [1182][M]+            | 43  |
| 1050548  | 18104105 |                       | 1   |
| 1344768  | 27027225 |                       | 1   |
| 1058328  | 20664151 |                       | 1   |

|          |          |                       |     |
|----------|----------|-----------------------|-----|
| 704763.6 | 12232575 | [487][M]+ [M+H-CH3]   | 209 |
| 1806375  | 2729439  |                       | 210 |
| 8696664  | 32274789 | [520][M]+             | 198 |
| 1043527  | 4038258  | [1438][M+2]+          | 123 |
| 192307.5 | 58555.69 |                       | 34  |
| 338898.2 | 90081.99 |                       | 95  |
| 1033016  | 1272719  | [904][M]+             | 54  |
| 1610965  | 14994968 |                       | 1   |
| 2853025  | 2201889  |                       | 179 |
| 37314939 | 2.9E+08  | [1288][M]+            | 1   |
| 243780.8 | 301255.8 |                       | 54  |
| 313114   | 275249.9 |                       | 114 |
| 2843716  | 622995.7 | [1183][M]+            | 176 |
| 121061.6 | 692326.8 | [2M+Na+K]             | 95  |
| 458267.9 | 390464   |                       | 446 |
| 398052.2 | 317956.6 | [M+Na]+ 3:            | 31  |
| 4411402  | 45893537 |                       | 1   |
| 32984.78 | 43249.24 | [449][M+1]+           | 35  |
| 257040.6 | 667827.5 |                       | 284 |
| 8880.106 | 1854175  | [M+2Na+K-             | 18  |
| 138644.4 | 61407.25 |                       | 355 |
| 8115697  | 7012259  | [1326][M+2]+          | 1   |
| 993467.6 | 7785002  |                       | 1   |
| 538916.3 | 90265.02 | [M+K]+ 68:            | 29  |
| 2015242  | 26803752 |                       | 1   |
| 312127.4 | 275640   | [1113][M+2]+          | 176 |
| 4623800  | 11878138 | [855][M]+             | 2   |
| 4192954  | 4445724  | [127][M]+ [M+H]+ 26:  | 76  |
| 234951.7 | 179945.8 | [24][M+1]+            | 78  |
| 1829403  | 1329453  | [1354][M]2 [M+2H]2+ : | 282 |
| 1066804  | 5431270  | [1373][M+2]+          | 150 |
| 812096.5 | 569418.4 | [717][M+1]+           | 236 |
| 82623.26 | 87817.85 |                       | 306 |
| 0        | 29056.07 | [M+Na]+ 6:            | 172 |
| 900561.9 | 1476764  | [M+H]+ 41:            | 14  |
| 741912.3 | 575942.2 | [M+Na]+ 4:            | 282 |
| 1314603  | 976643.7 | [1249][M]2+           | 202 |
| 8906750  | 16905008 | [557][M]+             | 61  |
| 1017050  | 1402151  | [637][M+1]+           | 132 |
| 25817829 | 89981346 | [1182][M+1]+          | 43  |
| 3798884  | 3439540  |                       | 143 |
| 1219716  | 195035.4 | [M+2Na-H]             | 18  |
| 1371278  | 22649623 |                       | 1   |
| 12369775 | 1.36E+08 |                       | 1   |
| 11541752 | 1.2E+08  |                       | 1   |
| 2428808  | 675456.7 | [1040][M+1]+          | 18  |
| 208385.6 | 279115.4 |                       | 303 |



|          |          |                      |     |
|----------|----------|----------------------|-----|
| 587481.2 | 282793.5 | [M+H+K]2+            | 29  |
| 173128.1 | 312836.4 | [2M+Na]+             | 172 |
| 67636.69 | 55940.21 | [1312][M+1]+         | 34  |
| 1254793  | 850294.2 |                      | 86  |
| 114526.6 | 293391.5 |                      | 160 |
| 1422135  | 5562750  | [954][M]2+ [3M+2H]2+ | 178 |
| 1154224  | 275618.7 |                      | 144 |
| 497476.4 | 1128834  |                      | 2   |
| 154952.9 | 4886924  | [M+2K-H]+            | 23  |
| 236487.4 | 440479.3 | [1318][M+1]+         | 79  |
| 7741230  | 1.57E+08 |                      | 1   |
| 2192232  | 1204872  | [1339][M]+ [M+H+HCC  | 25  |
| 1789290  | 21146271 | [477][M+1]+          | 1   |
| 221256.2 | 234174.3 | [M+2K]2+ (           | 25  |
| 674685.1 | 2102050  | [M+H]+ 36(           | 117 |
| 152341.9 | 85754.38 | [M+K]+ 28(           | 112 |
| 12950168 | 19580290 | [535][M]+ [M+H-H20]  | 4   |
| 1240264  | 395181.1 | [M+K]+ 69(           | 18  |
| 1247306  | 15742518 | [33][M]3+            | 1   |
| 18117.6  | 419654.8 | [2M+Na+2I            | 83  |
| 301543.1 | 190259.1 |                      | 8   |
| 449063   | 99765.34 |                      | 23  |
| 916407   | 5825752  | [1306][M+2]+         | 125 |
| 65067660 | 2.38E+08 | [1079][M]+           | 48  |
| 189729.4 | 272525.9 | [M+Na+CF(            | 160 |
| 907006.4 | 12138077 |                      | 1   |
| 96265.24 | 1023869  |                      | 390 |
| 3875229  | 376055.5 |                      | 383 |
| 516850.4 | 503081.6 | [986][M+2]3+         | 206 |
| 3625147  | 45556410 |                      | 1   |
| 1036007  | 854212.9 | [M+Na]+ 2(           | 178 |
| 3098269  | 4899113  |                      | 7   |
| 940450.6 | 13948464 |                      | 1   |
| 5518434  | 2231949  | [907][M+1]+          | 223 |
| 11784836 | 4501276  |                      | 1   |
| 6216106  | 76624022 | [367][M]2+           | 1   |
| 227651.5 | 444903.3 |                      | 73  |
| 664373.4 | 15148470 |                      | 1   |
| 1156923  | 907058.4 | [2M+2K-H]            | 40  |
| 1067002  | 1509923  | [M+H-C4H(            | 116 |
| 1156859  | 15484343 |                      | 1   |
| 2978786  | 302549.6 |                      | 76  |
| 15175973 | 37527641 |                      | 1   |
| 7335882  | 28521053 |                      | 1   |
| 3597304  | 21869166 |                      | 1   |
| 244436.6 | 309005.4 | [M+2Na-H]            | 159 |
| 1841702  | 10509857 | [1469][M]2+          | 11  |

|          |          |                     |     |
|----------|----------|---------------------|-----|
| 526616.9 | 387358.1 |                     | 112 |
| 19007064 | 2438146  |                     | 238 |
| 304416.2 | 172680.1 |                     | 62  |
| 6122521  | 1.03E+08 |                     | 1   |
| 363558.6 | 316104.9 |                     | 292 |
| 4.9E+08  | 6.47E+08 | [480][M]+ [M+H]+ 36 | 4   |
| 4660841  | 492787.7 |                     | 378 |
| 556892.8 | 454629.1 | [M+Na+NH            | 151 |
| 1333617  | 4678552  | [3M+Na+K]           | 104 |
| 194936.5 | 293754.9 |                     | 52  |
| 2478041  | 1618334  |                     | 448 |
| 597281.4 | 3504952  |                     | 130 |
| 749298   | 371001.8 | [1339][M+1]+        | 25  |
| 874763.8 | 955839.2 | [1039][M+1]2+       | 337 |
| 3634483  | 4121413  | [M+Na]+ 3           | 29  |
| 276323.5 | 199941.3 |                     | 319 |
| 364752.7 | 202949.3 | [161][M+1]+         | 179 |
| 527866.3 | 380684.5 | [M+Na+K+]           | 100 |
| 786826.6 | 1367085  | [632][M]+ [M+K+CF3C | 217 |
| 184752.4 | 308095.5 | [320][M+2]+         | 2   |
| 4747508  | 5096150  | [886][M+1]+         | 62  |
| 1045228  | 10525848 | [416][M+2]2+        | 1   |
| 306227.7 | 219598.1 |                     | 70  |
| 85793.3  | 383192.7 |                     | 221 |
| 1631383  | 229034   |                     | 214 |
| 598191.3 | 1887723  | [1557][M+1]+        | 334 |
| 2754725  | 8883091  |                     | 8   |
| 1712598  | 6686054  | [446][M]2+          | 1   |
| 1513859  | 2680269  | [1126][M+1]+        | 17  |
| 13611326 | 8546477  | [1173][M+1]+        | 25  |
| 271442.6 | 5039421  |                     | 1   |
| 5092753  | 27601174 | [1235][M+1]+        | 130 |
| 393358.5 | 790937.2 |                     | 244 |
| 12447266 | 22208037 | [354][M]+           | 81  |
| 3658512  | 26039790 | [367][M+1]2+        | 1   |
| 1249074  | 829242.4 | [1209][M+1]+        | 288 |
| 1118752  | 904324.5 |                     | 292 |
| 322712.9 | 356873.7 |                     | 25  |
| 12999745 | 14487395 | [876][M]+ [M+H+NH3  | 75  |
| 861102.4 | 3419911  |                     | 136 |
| 1465997  | 610691.8 | [1146][M+1]+        | 29  |
| 2372870  | 2318588  |                     | 410 |
| 1361548  | 1336367  |                     | 89  |
| 4713228  | 4671285  |                     | 256 |
| 7681.337 | 344163.1 | [400][M+1]+         | 103 |
| 401359.1 | 3889907  |                     | 1   |
| 243919.3 | 376191.3 |                     | 306 |

|          |          |                       |     |
|----------|----------|-----------------------|-----|
| 678676.9 | 567826.5 | [M+K+NH3              | 49  |
| 1396824  | 1461402  |                       | 57  |
| 47495803 | 1.81E+08 | [951][M]+ [M+H+NH3    | 65  |
| 286552.4 | 12813964 |                       | 1   |
| 76148.84 | 1865476  |                       | 1   |
| 234363.5 | 1.06E+08 | [M+H-C4H8             | 31  |
| 1005894  | 4386392  | [1148][M+1]+          | 43  |
| 170455.2 | 26513.89 | [M+K]+ 30:            | 86  |
| 339906.4 | 540216.6 |                       | 332 |
| 2027843  | 42869425 |                       | 1   |
| 50280.91 | 400280.2 |                       | 104 |
| 195957.6 | 14854905 |                       | 1   |
| 300634.7 | 1769305  |                       | 1   |
| 0        | 2979285  |                       | 350 |
| 303953.1 | 220546.7 |                       | 232 |
| 36517.05 | 49847.35 | [M+H-CH3]             | 34  |
| 798230   | 814091.4 |                       | 454 |
| 10508922 | 3487592  | [1040][M]+ [M+Na]+ 5: | 18  |
| 614613.5 | 576950.1 | [863][M+1]+           | 18  |
| 287692.5 | 212117.3 | [M+H+NH3              | 293 |
| 794436.4 | 955584.7 | [M+2H]2+ !            | 60  |
| 218922.4 | 113891.4 | [M+K+NaCl             | 52  |
| 174435   | 110685.5 | [M+Na]+ 30            | 221 |
| 785086.7 | 53840.89 |                       | 458 |
| 218882.9 | 15809.97 | [2M+Na+K]             | 18  |
| 1200347  | 160841.4 | [M+Na+HC              | 104 |
| 377705.1 | 1421753  |                       | 1   |
| 320082.6 | 288381.2 |                       | 200 |
| 616626.7 | 443113.5 | [1466][M]+            | 171 |
| 19229088 | 73274371 | [1079][M+1]+          | 48  |
| 228712.9 | 4979496  |                       | 1   |
| 151413.4 | 3779487  |                       | 1   |
| 377015.5 | 603246.2 | [M+H+NH3              | 17  |
| 261429.9 | 6190044  |                       | 1   |
| 171715   | 303056.4 | [M+K]+ 59:            | 100 |
| 4857770  | 5887739  | [319][M]+             | 204 |
| 522702.6 | 2409814  |                       | 125 |
| 191714.2 | 112514.4 |                       | 34  |
| 486248.6 | 99354.61 |                       | 300 |
| 3626711  | 15867902 | [1182][M+2]+          | 43  |
| 2718342  | 26410874 |                       | 1   |
| 153543.6 | 77661.11 |                       | 165 |
| 1123844  | 15199013 | [562][M]+             | 103 |
| 1781348  | 16907075 | [1359][M+1]+          | 1   |
| 3900554  | 88025668 | [501][M]2+            | 1   |
| 942779.6 | 1333688  |                       | 116 |
| 2466642  | 2666514  | [356][M+2]+           | 18  |

|          |          |                       |     |
|----------|----------|-----------------------|-----|
| 1448386  | 1531262  | [1190][M+1]+          | 197 |
| 2955370  | 3444697  |                       | 280 |
| 2061900  | 6915823  | [466][M+1]+           | 198 |
| 493145.3 | 217230.9 |                       | 441 |
| 30754277 | 1.17E+08 | [811][M]+             | 81  |
| 752006.9 | 907772.3 |                       | 97  |
| 778827.8 | 233413.1 | [M+Na]+ 60            | 23  |
| 115332.6 | 737496   | [M+H-CO]+             | 49  |
| 10272466 | 13466811 | [155][M]+ [M+H]+ 270  | 228 |
| 3635408  | 51147187 | [1359][M]+            | 1   |
| 360283   | 463424.8 | [M+Na]+ 31            | 101 |
| 1636910  | 1728604  | [1089][M+5]+          | 2   |
| 1328774  | 7617759  |                       | 1   |
| 265039.7 | 1428733  |                       | 12  |
| 220320.1 | 92040.61 |                       | 75  |
| 1285719  | 2619668  | [1029][M+2]+          | 11  |
| 917948.1 | 4103388  | [1105][M]+ [M+K]+ 528 | 168 |
| 65546.56 | 382331.8 |                       | 100 |
| 244140.6 | 7.13E+09 |                       | 1   |
| 612739.8 | 994807.7 | [M+Na]+ 30            | 119 |
| 76330.81 | 14765.37 | [2M+Na+K]             | 188 |
| 105459.4 | 176027.5 | [M+K+NH3              | 202 |
| 176518.6 | 64089.07 | [992][M+1]+           | 412 |
| 1100646  | 977780.4 | [1291][M+1]+          | 34  |
| 14759309 | 1223748  |                       | 1   |
| 51739121 | 34088562 | [1173][M]+ [M+H]+ 590 | 25  |
| 47891.46 | 97951.29 |                       | 61  |
| 96348.16 | 154798.2 | [M+Na+NH              | 49  |
| 8680.008 | 246652.3 |                       | 103 |
| 275582.1 | 1482809  |                       | 99  |
| 311234.4 | 3967827  | [474][M+3]+           | 1   |
| 173999.1 | 204949.8 | [449][M]+             | 35  |
| 21830.87 | 540364.6 | [M+K+HCO              | 55  |
| 1.12E+08 | 59299854 |                       | 1   |
| 16102472 | 8089729  |                       | 75  |
| 0        | 3313380  |                       | 1   |
| 105074.2 | 142661.9 |                       | 410 |
| 670560.2 | 687202.8 |                       | 415 |
| 367293.3 | 7456072  |                       | 39  |
| 4683561  | 374123.9 | [M+H]+ 510            | 217 |
| 275037.3 | 393725.9 | [M+H-CO]+             | 116 |
| 3806017  | 10593384 | [1231][M]+            | 45  |
| 686395.2 | 424726.6 | [M+H+HCC              | 47  |
| 459561.4 | 98622.9  |                       | 244 |
| 1170200  | 6559241  |                       | 1   |
| 1163271  | 13533435 |                       | 1   |
| 104041.6 | 6742180  |                       | 1   |

|          |          |                       |     |
|----------|----------|-----------------------|-----|
| 1.18E+08 | 1.67E+08 | [1204][M]+            | 12  |
| 986350.2 | 12996415 |                       | 1   |
| 1429901  | 2809417  |                       | 54  |
| 1361877  | 5793129  | [520][M+1]+           | 198 |
| 6008.406 | 133369.4 |                       | 181 |
| 1459791  | 627889.2 | [85][M]+ [M+H-C6H8    | 276 |
| 235734.6 | 1334866  | [M+K]+ 66C            | 150 |
| 429100.4 | 5842916  |                       | 5   |
| 51652.32 | 498145.3 | [M+H-CO]+             | 209 |
| 390525.1 | 13108070 |                       | 6   |
| 8382113  | 9072423  | [1133][M+1]+          | 75  |
| 165903.7 | 188654.9 | [M+2H-CH2             | 205 |
| 12521932 | 51429727 | [951][M+1]+           | 65  |
| 5706494  | 11728804 |                       | 1   |
| 993398.6 | 683897   | [559][M]3+            | 62  |
| 755997.3 | 1983481  | [M+Na+Na              | 104 |
| 1449982  | 1693900  | [1389][M+1]+          | 10  |
| 2046713  | 1646711  | [1295][M+2]+          | 205 |
| 1232681  | 1019987  |                       | 260 |
| 5304083  | 17978934 | [1148][M]+            | 43  |
| 1463643  | 16030837 |                       | 1   |
| 320632.7 | 251283.3 |                       | 18  |
| 113633   | 447666.7 | [8][M+2]2+            | 83  |
| 2986282  | 445740   | [754][M+1]+           | 62  |
| 14157526 | 23489628 |                       | 74  |
| 2072824  | 3192341  | [961][M+1]2+          | 244 |
| 236545.1 | 86493.85 | [999][M+1]+           | 41  |
| 328558.7 | 232518.6 | [101][M+1]+           | 298 |
| 780012   | 238207.5 | [1144][M]+ [M+H-CH4]  | 251 |
| 78610.3  | 98834.46 |                       | 61  |
| 4012249  | 1998744  | [1094][M]+            | 175 |
| 16097151 | 21415906 | [39][M]+ [M+H-C4H8    | 228 |
| 9207960  | 11483218 | [1388][M+3]+          | 11  |
| 8283550  | 7892068  |                       | 376 |
| 2001618  | 2058135  | [1468][M+1]+          | 217 |
| 20842416 | 76263298 |                       | 81  |
| 422295   | 87753.27 |                       | 114 |
| 11990286 | 37559955 | [466][M]+             | 198 |
| 62374.61 | 126997.5 | [1291][M+2]+          | 34  |
| 2416950  | 29656934 | [1360][M]2+           | 1   |
| 723936   | 2802080  | [1231][M+1]+          | 45  |
| 1.34E+08 | 2.19E+08 | [117][M]+             | 4   |
| 227689.9 | 333315.4 | [M+H+HCC              | 289 |
| 100995.6 | 1137905  |                       | 187 |
| 1367807  | 1906982  |                       | 11  |
| 1827497  | 1466898  | [1047][M]+ [M+K]+ 50; | 160 |
| 1060731  | 795088.6 | [1207][M+5]+          | 100 |

|          |          |               |     |
|----------|----------|---------------|-----|
| 3397616  | 5774465  | [952][M]+     | 69  |
| 290399.2 | 207799.1 |               | 272 |
| 1098489  | 746481.4 | [1162][M+1]+  | 100 |
| 1438123  | 544786.5 |               | 430 |
| 530087   | 10628104 |               | 1   |
| 395496.9 | 412558.3 | [M+2K]2+ †    | 47  |
| 13237358 | 1.37E+08 |               | 1   |
| 528239.1 | 1626854  |               | 69  |
| 1954367  | 1664171  | [1368][M+2]+  | 205 |
| 5460242  | 96161609 | [502][M]2+    | 1   |
| 257087   | 1156891  |               | 11  |
| 6003160  | 60912523 |               | 1   |
| 266289.1 | 1450122  | [M+3H-C4†     | 11  |
| 347394.3 | 365851.7 | [27][M+1]+    | 199 |
| 266204.7 | 24441.25 | [1097][M+1]2+ | 29  |
| 105013.7 | 1306588  |               | 225 |
| 420018.6 | 667810.6 | [M+2K]2+ †    | 151 |
| 471724.7 | 431871   | [662][M+1]+   | 221 |
| 771329.2 | 1300764  | [1318][M]+    | 79  |
| 568005   | 7764669  |               | 1   |
| 3966468  | 1538290  |               | 173 |
| 7326915  | 25523033 | [1020][M]+    | 48  |
| 4191268  | 3888977  | [1190][M]+    | 197 |
| 564185.1 | 664103.7 | [M+Na+CF:     | 245 |
| 3411083  | 2541656  | [M+K+NH3      | 319 |
| 664539.3 | 238348.5 |               | 244 |
| 3007555  | 35375515 |               | 1   |
| 1176449  | 1010497  | [M+Na+HC      | 100 |
| 6975175  | 29983763 | [811][M+1]+   | 81  |
| 8239696  | 84934257 |               | 1   |
| 313671.8 | 161813.4 |               | 19  |
| 2522381  | 26322371 | [1360][M+1]2+ | 1   |
| 512278.9 | 511002.7 | [1211][M+1]2+ | 436 |
| 946596.2 | 1527759  |               | 351 |
| 879171.4 | 406443.9 | [1094][M+1]+  | 175 |
| 505592.5 | 7879738  |               | 1   |
| 703205.8 | 19279532 |               | 1   |
| 2113047  | 43099540 |               | 1   |
| 766670.5 | 8806566  |               | 1   |
| 989061.7 | 757055.1 | [286][M+1]+   | 17  |
| 10366922 | 10943327 | [210][M]+     | 18  |
| 155076.8 | 186657.2 | [68][M+2]2+   | 52  |
| 4145295  | 17607778 |               | 198 |
| 83051.81 | 150143.3 |               | 181 |
| 1540770  | 1701521  | [576][M+1]+   | 2   |
| 83648.43 | 1080006  | [M+Na]+ 3:    | 104 |
| 5625799  | 8087305  | [M+Na+Na      | 4   |

|          |          |                      |     |
|----------|----------|----------------------|-----|
| 1417844  | 5883376  | [688][M+1]2+         | 4   |
| 5237948  | 365219.7 | [M+Na]+ 5:           | 217 |
| 36709149 | 3.34E+08 |                      | 1   |
| 93536.74 | 4918310  |                      | 1   |
| 4334684  | 95506392 | [450][M]2+           | 1   |
| 1303914  | 784541.8 | [735][M+1]+          | 18  |
| 325166.1 | 1647024  | [1375][M]+           | 73  |
| 249948.6 | 399168.7 | [1483][M]+           | 308 |
| 35221363 | 54924494 | [1204][M+1]+         | 12  |
| 2142092  | 1013999  | [3M+2Na+I            | 100 |
| 218867.3 | 226149.7 | [461][M+2]+          | 47  |
| 155728.2 | 454939.9 |                      | 308 |
| 192454.2 | 97861.53 | [M+K]+ 26:           | 24  |
| 123029   | 62165.06 | [M+K]+ 87:           | 34  |
| 1717824  | 2218657  | [267][M+1]+          | 47  |
| 1150319  | 346725.2 |                      | 93  |
| 630620.5 | 629000.2 |                      | 8   |
| 17142381 | 1.57E+08 | [78][M]+             | 91  |
| 514227   | 193696   | [762][M+1]+          | 52  |
| 270033.8 | 4681474  |                      | 78  |
| 310031.4 | 146551.1 | [M+2H-CO(            | 25  |
| 1129940  | 15832939 |                      | 1   |
| 17903309 | 1.51E+08 |                      | 1   |
| 86445.72 | 318079.2 |                      | 400 |
| 0        | 302059.8 |                      | 83  |
| 1691827  | 42021512 |                      | 1   |
| 2054768  | 8008865  | [899][M+1]+          | 65  |
| 486147.4 | 1083762  | [1484][M+3]+         | 139 |
| 659285.5 | 11321490 |                      | 1   |
| 993322.9 | 1389765  | [M+H]+ 41(           | 49  |
| 12030750 | 7070619  | [1038][M]+           | 190 |
| 2344963  | 3095801  | [1055][M]+ [M+2Na-H] | 49  |
| 199162.6 | 1103045  |                      | 81  |
| 4696485  | 5413554  |                      | 204 |
| 1329268  | 28290961 | [1236][M]2+          | 130 |
| 45712.86 | 1163400  | [M+Na+K-t            | 55  |
| 14201372 | 17019068 | [494][M+1]2+         | 1   |
| 57311.46 | 760771.1 |                      | 124 |
| 23191098 | 1.49E+08 |                      | 1   |
| 0        | 278088.4 |                      | 97  |
| 401351.5 | 535102.2 |                      | 78  |
| 404101.2 | 2352960  |                      | 49  |
| 5222242  | 45214341 |                      | 1   |
| 179167   | 635834.9 |                      | 64  |
| 67135.18 | 56234.27 | [1114][M+4]+         | 47  |
| 569708.9 | 1278088  | [M+H-COCl            | 60  |
| 130255.6 | 269431.8 | [M+Na]+ 3:           | 119 |

|          |          |                                              |     |
|----------|----------|----------------------------------------------|-----|
| 439311.7 | 471502   |                                              | 460 |
| 42501.4  | 1552177  | [M+H] <sup>+</sup> 44                        | 209 |
| 481919.3 | 7035286  |                                              | 1   |
| 386701.9 | 62956.95 | [3M+2H] <sup>2+</sup>                        | 18  |
| 2082227  | 3049976  | [M+Na+NH                                     | 104 |
| 3121492  | 4912855  |                                              | 2   |
| 10555353 | 14330916 | [696][M] <sup>+</sup>                        | 179 |
| 1694615  | 3253549  |                                              | 167 |
| 3379217  | 5329837  | [961][M] <sup>2+</sup>                       | 244 |
| 1159381  | 33810173 |                                              | 1   |
| 1915358  | 13101479 | [M+K+NH <sub>3</sub>                         | 133 |
| 13022668 | 1.61E+08 |                                              | 1   |
| 206213.2 | 0        | [M+Na] <sup>+</sup> 7:                       | 47  |
| 33920013 | 6014003  | [1364][M+2] <sup>+</sup>                     | 1   |
| 96638703 | 1.46E+08 | [159][M+1] <sup>+</sup>                      | 17  |
| 1324659  | 10073333 | [474][M+1] <sup>+</sup>                      | 1   |
| 6919.379 | 280303.1 | [M+Na+NH                                     | 104 |
| 2984945  | 10690530 |                                              | 5   |
| 852103.9 | 2026652  |                                              | 170 |
| 553234.7 | 2402258  | [383][M+1] <sup>2+</sup>                     | 10  |
| 387663.4 | 4345838  |                                              | 1   |
| 1082679  | 1064473  | [M+3Na-H]                                    | 18  |
| 923881.1 | 383610.3 | [937][M+1] <sup>+</sup>                      | 66  |
| 68882.74 | 170640.6 | [1483][M+1] <sup>+</sup>                     | 308 |
| 294941.8 | 532305.5 | [2M+K] <sup>+</sup> 3(                       | 49  |
| 619550.5 | 9540094  |                                              | 1   |
| 471707.3 | 148691.3 | [1043][M] <sup>+</sup>                       | 41  |
| 690933.1 | 310500.6 | [1228][M+1] <sup>+</sup>                     | 118 |
| 197704.6 | 917411.1 | [451][M+1] <sup>+</sup>                      | 49  |
| 2154109  | 7846108  | [835][M+4] <sup>+</sup>                      | 2   |
| 1733539  | 1710925  |                                              | 227 |
| 5169357  | 6544387  |                                              | 97  |
| 38474.78 | 1241371  |                                              | 97  |
| 5336878  | 42716233 | [M+Na] <sup>+</sup> 2:                       | 133 |
| 357117.2 | 90596.22 |                                              | 23  |
| 429882.4 | 422261.2 | [M+2H-NH                                     | 202 |
| 1287709  | 5509093  | [1469][M+1] <sup>2+</sup>                    | 11  |
| 67206.31 | 246677.1 |                                              | 161 |
| 16842213 | 25582393 | [86][M+1] <sup>+</sup>                       | 4   |
| 6098702  | 5067301  | [558][M] <sup>+</sup> [M+H] <sup>+</sup> 38: | 254 |
| 131659.1 | 30081.97 | [260][M+1] <sup>+</sup>                      | 66  |
| 105220.9 | 86200.85 | [M+K] <sup>+</sup> 52:                       | 47  |
| 5412425  | 5838945  |                                              | 6   |
| 1294760  | 1371226  |                                              | 298 |
| 2448162  | 1283711  | [M+H-H <sub>2</sub> O]                       | 343 |
| 15585209 | 49988281 |                                              | 1   |
| 17722723 | 23220039 | [203][M] <sup>+</sup> [M+H+NH <sub>3</sub>   | 228 |



|          |          |                      |     |
|----------|----------|----------------------|-----|
| 824807.1 | 1591243  | [557][M+1]+          | 61  |
| 1353648  | 4335488  | [220][M+1]+          | 55  |
| 6594580  | 6260624  | [1337][M]+           | 227 |
| 1.41E+08 | 23432156 |                      | 1   |
| 49465307 | 59281251 | [358][M]+            | 4   |
| 184886.9 | 220919.5 | [188][M+2]2+         | 151 |
| 6654.775 | 991481   |                      | 91  |
| 569387   | 492441.7 |                      | 404 |
| 1813042  | 1626681  | [M+Na+NH             | 11  |
| 400132.7 | 280696.3 | [3M+2Na]2            | 116 |
| 1371801  | 1811945  | [1104][M+1]2+        | 70  |
| 1569823  | 4569868  | [772][M+1]+          | 4   |
| 47076315 | 1.3E+08  |                      | 1   |
| 39632.48 | 22508.53 | [M+H-CH3]            | 34  |
| 68931.21 | 30652.2  | [M+H-CO2]            | 309 |
| 708094.1 | 1590916  |                      | 10  |
| 465733.7 | 851012   |                      | 85  |
| 216452.8 | 52632.69 | [3M+H]+ 2!           | 17  |
| 237689.8 | 272484.9 |                      | 83  |
| 1853948  | 1538610  |                      | 28  |
| 2091236  | 10106566 |                      | 1   |
| 158015.2 | 492093.4 |                      | 97  |
| 712858.1 | 1301688  | [1223][M]+           | 10  |
| 169254   | 364094.7 | [M+K]+ 41!           | 237 |
| 45227545 | 94624496 |                      | 1   |
| 3272904  | 3504897  |                      | 232 |
| 5460242  | 40937756 |                      | 1   |
| 29608046 | 63432820 | [1230][M+2]+         | 10  |
| 782420.3 | 537916.6 |                      | 297 |
| 3044310  | 3194082  | [1256][M]+           | 57  |
| 1650143  | 2104453  | [M+H-CH3]            | 127 |
| 228778.6 | 1022389  |                      | 78  |
| 3759222  | 1552674  | [1075][M+1]+         | 222 |
| 34029503 | 5382796  |                      | 6   |
| 5737571  | 6464819  | [276][M]+            | 75  |
| 2094059  | 1852869  |                      | 29  |
| 1467968  | 1855834  | [M+H]+ 40!           | 101 |
| 15201382 | 25227778 |                      | 1   |
| 1029998  | 8896151  | [504][M+1]2+         | 1   |
| 3671450  | 5089107  |                      | 187 |
| 819768.3 | 16951445 |                      | 1   |
| 5.41E+08 | 8.1E+08  | [159][M]+ [M+H]+ 27! | 17  |
| 2638883  | 1655384  | [880][M]+            | 190 |
| 151480   | 9643.246 | [M+H-NH3]            | 79  |
| 7913161  | 13097522 | [150][M]+            | 84  |
| 512583.7 | 2312226  |                      | 145 |
| 264611   | 1608205  | [1182][M+3]+         | 43  |

|          |          |                       |     |
|----------|----------|-----------------------|-----|
| 2157566  | 8543872  | [755][M+1]+           | 81  |
| 179449.4 | 71451.82 |                       | 115 |
| 1357719  | 17779454 |                       | 1   |
| 411662.8 | 2712007  | [811][M+2]+           | 81  |
| 245404.9 | 85145.12 | [1424][M+4]+          | 100 |
| 68851.35 | 334140.5 |                       | 61  |
| 31373599 | 1.69E+08 |                       | 1   |
| 67562566 | 32863747 |                       | 1   |
| 159614.5 | 210071.6 | [45][M+1]+            | 16  |
| 237466.4 | 113211.7 |                       | 292 |
| 2487241  | 15344286 | [451][M]+ [M+K]+ 32C  | 49  |
| 12028389 | 58647880 |                       | 1   |
| 12481228 | 20752682 | [296][M]+             | 81  |
| 380072.5 | 415545   |                       | 463 |
| 2392865  | 11387601 | [1079][M+2]+          | 48  |
| 128922.8 | 345788.4 | [1070][M+2]3+         | 443 |
| 2401323  | 1523910  |                       | 25  |
| 165639.3 | 46250.75 | [874][M+1]+           | 23  |
| 2350228  | 3661147  | [446][M+1]2+          | 1   |
| 153748.6 | 126347.4 | [158][M+1]+           | 60  |
| 1492451  | 29644769 |                       | 1   |
| 8431149  | 58527414 |                       | 1   |
| 157913.8 | 123824.9 |                       | 254 |
| 894961.6 | 321456.3 |                       | 156 |
| 893939.4 | 211299.7 | [M+2Na-H]             | 107 |
| 2931252  | 3000248  | [1329][M]+            | 223 |
| 1450378  | 751754.4 |                       | 256 |
| 39961.18 | 656979.3 | [2M+Na+K-             | 90  |
| 6136115  | 10035979 | [1104][M]2+           | 70  |
| 3378765  | 8784131  | [772][M+2]+           | 4   |
| 140112.1 | 138132.3 | [M+H]+ 27'            | 83  |
| 54863.34 | 320901.9 |                       | 173 |
| 2494652  | 1184649  | [1191][M]+ [M+K+HCO   | 127 |
| 472294.8 | 1157101  |                       | 10  |
| 950078.4 | 1634929  | [1347][M+2]+          | 2   |
| 676877.6 | 60410.65 |                       | 17  |
| 1816328  | 1500154  | [795][M+1]+           | 23  |
| 19346228 | 8575581  | [907][M]+             | 223 |
| 675778.5 | 1105829  |                       | 2   |
| 3598130  | 3304960  | [1291][M]+ [M+Na]+ 6: | 34  |
| 138635.1 | 132829   |                       | 461 |
| 1861275  | 28987126 |                       | 1   |
| 341293.3 | 501195.7 |                       | 384 |
| 1326060  | 3730489  | [507][M+1]2+          | 1   |
| 477157   | 1137721  | [1187][M]+            | 284 |
| 42351.54 | 1746312  | [562][M+1]+           | 103 |
| 40623.14 | 1308921  | [M+H-COCl             | 55  |

|          |          |                       |     |
|----------|----------|-----------------------|-----|
| 1285228  | 2090075  | [2M+H+K]2             | 4   |
| 403198   | 863254.9 |                       | 4   |
| 269912.1 | 516438.4 |                       | 397 |
| 3744840  | 2821431  | [M+Na]+ 6:            | 202 |
| 2864701  | 3813566  | [1215][M+2]+          | 109 |
| 28493624 | 47001114 |                       | 70  |
| 32291.52 | 5972760  |                       | 1   |
| 1557642  | 6589660  | [1020][M+1]+          | 48  |
| 53409.07 | 23971.89 | [485][M+2]+           | 223 |
| 1137529  | 984247.7 |                       | 11  |
| 16708.91 | 467372.5 | [1096][M+1]+          | 104 |
| 216199.9 | 1244804  |                       | 83  |
| 737056.4 | 6908333  |                       | 1   |
| 2277570  | 6372973  | [1230][M+3]+          | 10  |
| 1977981  | 1668773  | [60][M+1]+            | 4   |
| 998833.1 | 1467329  | [M+2H]2+ :            | 109 |
| 373143.3 | 2483400  |                       | 1   |
| 2255808  | 7395482  |                       | 1   |
| 8028347  | 33956532 |                       | 253 |
| 122662.8 | 2033095  |                       | 1   |
| 10861899 | 37216599 | [755][M]+             | 81  |
| 1184859  | 2551854  | [M+H-CO]+             | 119 |
| 300017.3 | 779884.6 | [1178][M+1]+          | 170 |
| 12235949 | 14016905 | [1364][M+1]+          | 1   |
| 230964.8 | 614994.1 |                       | 61  |
| 139439.6 | 1076851  | [1105][M+1]+          | 168 |
| 905156.5 | 1948885  |                       | 422 |
| 4301234  | 19333968 | [56][M+1]2+           | 1   |
| 9534785  | 35917955 | [853][M]+             | 2   |
| 30001377 | 38096166 | [M+2K]2+ :            | 4   |
| 1789641  | 911102.7 | [1497][M+1]+          | 11  |
| 1643334  | 1277439  |                       | 128 |
| 139510.5 | 4248587  |                       | 199 |
| 232241.4 | 122155.3 |                       | 23  |
| 162857.7 | 92334.88 |                       | 34  |
| 408555.1 | 363079.5 | [867][M+4]+           | 391 |
| 2492201  | 3414625  |                       | 2   |
| 412333.8 | 395027.4 |                       | 16  |
| 84273.64 | 909809.1 |                       | 166 |
| 505470.5 | 2994342  | [M+Na]+ 8:            | 4   |
| 809651.9 | 12091884 |                       | 1   |
| 295553.5 | 296411.8 | [1312][M]+ [M+K]+ 63: | 34  |
| 510288.8 | 16924707 | [M+Na]+ 3:            | 55  |
| 1168764  | 378832.9 | [M+H]+ 77:            | 118 |
| 31527.87 | 482869.8 |                       | 225 |
| 534481.3 | 2752811  |                       | 172 |
| 439224   | 242426.2 | [M+Na]+ 6:            | 29  |

|          |          |                       |     |
|----------|----------|-----------------------|-----|
| 1801344  | 1849255  |                       | 2   |
| 201092.5 | 111413.9 |                       | 228 |
| 1001351  | 3677139  | [M+K]+ 362            | 4   |
| 793421.6 | 1687299  |                       | 85  |
| 10462674 | 39901424 |                       | 1   |
| 293103.1 | 776157.7 | [1550][M+2]+          | 312 |
| 450934.9 | 3.1E+08  |                       | 24  |
| 1292560  | 1543149  | [11][M+1]+            | 4   |
| 9405589  | 8306855  | [1347][M+1]+          | 2   |
| 1298320  | 2942747  | [1178][M]+            | 170 |
| 1052996  | 8274204  | [1545][M]+ [M+K]+ 934 | 11  |
| 127137.7 | 257629   |                       | 186 |
| 295478.3 | 338709.4 |                       | 121 |
| 560301.2 | 301131.2 |                       | 469 |
| 1485100  | 1397111  | [1217][M+2]+          | 75  |
| 31065145 | 12482909 |                       | 1   |
| 2867496  | 7074653  |                       | 10  |
| 3976724  | 3178150  | [M+2H]2+ :            | 219 |
| 3451660  | 15566713 | [1457][M+2]+          | 1   |
| 1105088  | 1310300  |                       | 164 |
| 4237383  | 46449307 |                       | 1   |
| 1523238  | 2171794  |                       | 164 |
| 1.42E+09 | 3.04E+09 |                       | 1   |
| 888466.8 | 1129373  |                       | 68  |
| 1176501  | 922129.4 |                       | 114 |
| 15368147 | 1.4E+08  | [373][M]2+            | 1   |
| 794020.6 | 5875664  | [M+Na]+ 5:            | 11  |
| 251011.1 | 113364   | [1006][M+1]+          | 32  |
| 10944655 | 44840141 |                       | 1   |
| 9193731  | 32861502 | [899][M]+ [M+H]+ 494  | 65  |
| 16751.95 | 1362032  | [M+H-CO]+             | 199 |
| 189499.6 | 440818.2 |                       | 49  |
| 3356458  | 2607498  | [1125][M+1]+          | 29  |
| 1330642  | 1354764  |                       | 68  |
| 133095.6 | 102622.6 |                       | 222 |
| 1308938  | 4909819  |                       | 7   |
| 579992.2 | 153995.4 | [840][M+2]2+          | 301 |
| 1845126  | 15269257 | [1284][M]+            | 81  |
| 172857.6 | 206009.2 |                       | 345 |
| 4636953  | 17344385 |                       | 1   |
| 562911.8 | 42865.44 | [1030][M]2+           | 18  |
| 169931.4 | 80486.25 |                       | 474 |
| 593537.8 | 590489.3 | [887][M+1]+           | 296 |
| 31232814 | 44088243 | [1214][M+1]+          | 73  |
| 159183.9 | 28975.67 | [M+H]+ 454            | 18  |
| 118270.4 | 87154.56 |                       | 33  |
| 1838410  | 2360961  | [388][M]+             | 354 |

|          |          |                       |     |
|----------|----------|-----------------------|-----|
| 227488   | 148152.1 | [213][M+1]+           | 254 |
| 49481.68 | 476284.9 | [624][M+2]+           | 104 |
| 67581.63 | 256939.3 | [1346][M+1]+          | 50  |
| 572926.1 | 551169.4 |                       | 362 |
| 6079125  | 2429637  | [385][M]+             | 365 |
| 1667954  | 2703370  | [130][M+1]+           | 116 |
| 3073442  | 3071011  | [M+2H]2+ !            | 312 |
| 1474309  | 2421842  |                       | 135 |
| 63075.68 | 807522   |                       | 400 |
| 254085.3 | 371148.5 |                       | 362 |
| 897763.9 | 386950.7 | [1091][M+1]+          | 127 |
| 10079464 | 69072842 | [412][M]+             | 1   |
| 760969.2 | 1687157  |                       | 11  |
| 513118   | 3467376  | [108][M+1]+           | 208 |
| 289422.5 | 28869.85 |                       | 134 |
| 2593799  | 46489194 |                       | 1   |
| 2274913  | 382004.7 |                       | 417 |
| 1130789  | 8118328  | [382][M]+ [M+H-C5H8   | 49  |
| 3583653  | 1957650  | [251][M+1]+           | 233 |
| 11656338 | 14258609 | [M+H-NH3]             | 8   |
| 7673206  | 1866752  |                       | 53  |
| 692020.4 | 1867873  |                       | 248 |
| 65101.81 | 11353.19 | [M+Na]+ 4:            | 119 |
| 10652960 | 34875531 | [618][M]+             | 81  |
| 2626548  | 2226257  | [1300][M]+ [M+Na]+ 6: | 107 |
| 1079388  | 128882.1 | [M+H]+ 73:            | 18  |
| 2329881  | 14370162 | [450][M+1]2+          | 1   |
| 1800416  | 3018417  | [296][M+1]+           | 81  |
| 111625.8 | 266270.6 | [760][M+1]+           | 119 |
| 11127.97 | 53616.12 | [3M+2Na+I             | 86  |
| 1427316  | 1786125  |                       | 4   |
| 837959.3 | 919790.5 | [276][M+1]+           | 75  |
| 336976.7 | 108089.2 | [34][M+1]+            | 104 |
| 3218549  | 548626.5 | [545][M]+             | 19  |
| 895091.1 | 550996.5 |                       | 104 |
| 1064433  | 732280.9 | [M+K]+ 31:            | 318 |
| 9922712  | 39472700 |                       | 1   |
| 4808517  | 2659133  | [759][M]3+            | 2   |
| 151594.4 | 385062.9 |                       | 243 |
| 925559   | 1191503  | [669][M+1]2+          | 137 |
| 129215.2 | 3356786  |                       | 1   |
| 48808.8  | 356013.6 | [M+K]+ 39:            | 101 |
| 302702.5 | 1087502  | [3M+2Na]2             | 49  |
| 4768568  | 7256302  | [M+K+HCO              | 4   |
| 324553.3 | 3884537  |                       | 103 |
| 572601.4 | 704406.9 |                       | 23  |
| 2305625  | 33283285 |                       | 1   |

|          |          |                      |     |
|----------|----------|----------------------|-----|
| 592184.5 | 1046612  |                      | 19  |
| 68179.48 | 47079.84 | [658][M]3+           | 62  |
| 8488655  | 8391714  | [526][M]+            | 70  |
| 1930063  | 515091.6 | [M+Na+NH             | 4   |
| 991853.5 | 904240.6 | [1256][M+1]+         | 57  |
| 29807.89 | 753399.9 |                      | 55  |
| 186917   | 63842.96 | [1144][M+1]+         | 251 |
| 502780.8 | 538597.9 |                      | 468 |
| 414693.5 | 5314796  |                      | 1   |
| 512553   | 1036802  | [M+H]+ 320           | 22  |
| 179523.1 | 80354.55 | [M+H-NH3]            | 217 |
| 5786736  | 34913719 | [1029][M+1]+         | 11  |
| 518345.6 | 1056930  |                      | 41  |
| 2316020  | 6163229  |                      | 38  |
| 449784.5 | 335607.1 |                      | 120 |
| 7878620  | 7837574  |                      | 370 |
| 252926.5 | 483352.1 | [1361][M+1]2+        | 40  |
| 1128868  | 22553867 |                      | 1   |
| 1271026  | 1926263  | [245][M]+ [M+Na]+ 20 | 119 |
| 2087621  | 252176.7 | [M+H]+ 350           | 104 |
| 2.75E+08 | 6.93E+08 | [378][M]2+           | 1   |
| 1719391  | 959976.2 | [M+K+CF3O            | 104 |
| 4408193  | 9323223  | [1069][M+1]+         | 2   |
| 267049.6 | 216373.8 | [M+H]+ 300           | 134 |
| 11083708 | 60183336 |                      | 1   |
| 1609132  | 27869515 |                      | 1   |
| 395368.7 | 552865.1 |                      | 377 |
| 21178.69 | 1081050  |                      | 103 |
| 4219193  | 5685638  | [781][M]+            | 284 |
| 2905456  | 693739.7 | [M+H-CH4]            | 116 |
| 119350.3 | 405193.8 | [M+H]+ 320           | 22  |
| 362894.4 | 571039.8 | [M+H-H2O]            | 104 |
| 77011.28 | 76906.25 | [1464][M+3]+         | 278 |
| 737873.9 | 8538609  |                      | 1   |
| 333872.4 | 191136.4 |                      | 412 |
| 636235.2 | 338656.6 |                      | 210 |
| 3545964  | 9122999  | [919][M+2]+          | 4   |
| 781009.2 | 6207809  | [1392][M+1]+         | 1   |
| 435799   | 11719710 | [M+Na]+ 20           | 199 |
| 5723009  | 15566893 |                      | 1   |
| 1014137  | 2463501  |                      | 173 |
| 95752.32 | 250071   |                      | 39  |
| 1792389  | 3362439  | [354][M+1]+          | 81  |
| 298459.9 | 172227.6 |                      | 114 |
| 74874.71 | 90558.45 |                      | 61  |
| 12496.6  | 172318.6 |                      | 351 |
| 558977.9 | 454977.5 | [392][M]+ [M+Na]+ 30 | 18  |

|          |          |                     |     |
|----------|----------|---------------------|-----|
| 3642875  | 5649115  | [253][M+1]+         | 119 |
| 630982.1 | 1244852  | [781][M+1]+         | 284 |
| 482807.6 | 603952   |                     | 195 |
| 278540.2 | 129961.5 |                     | 347 |
| 671636.6 | 1197897  | [771][M+2]+         | 119 |
| 767174.7 | 996887.6 |                     | 20  |
| 552319.5 | 265547.8 | [1493][M+1]+        | 11  |
| 64612.76 | 195436.1 |                     | 304 |
| 276731.5 | 6777284  |                     | 1   |
| 136285.4 | 129092   |                     | 108 |
| 8691822  | 23933336 |                     | 10  |
| 238205.2 | 111581.9 | [1428][M+3]+        | 175 |
| 70679.79 | 53323.45 | [M+H-C4H8]          | 34  |
| 267705.2 | 505558.4 | [M+H-H2O]           | 100 |
| 2413340  | 2425034  | [887][M]+           | 296 |
| 3370367  | 4226519  |                     | 117 |
| 1221269  | 3429062  |                     | 1   |
| 572580.3 | 829675.3 | [M+K]+ 314          | 289 |
| 19154162 | 25904882 | [1215][M+1]+        | 109 |
| 270259.1 | 1935238  | [M+K]+ 514          | 341 |
| 434694.9 | 334376.7 |                     | 357 |
| 617215.9 | 647817.8 |                     | 32  |
| 251179.2 | 455183.3 |                     | 289 |
| 1400602  | 2191734  |                     | 91  |
| 243953.3 | 233692.6 | [2M+Na+3I]          | 151 |
| 3086681  | 3154294  | [867][M+2]+         | 391 |
| 2721683  | 196795.7 |                     | 389 |
| 2031456  | 2608002  | [921][M+1]+         | 11  |
| 222180.6 | 1325948  | [M+K+HCO]           | 101 |
| 398476.3 | 289478.3 |                     | 355 |
| 3531015  | 18446871 |                     | 394 |
| 4958546  | 83976963 |                     | 1   |
| 1151638  | 966215   | [M+H-H2O]           | 243 |
| 905352.7 | 77172893 |                     | 91  |
| 530087   | 11286332 |                     | 1   |
| 116103.5 | 160350.1 | [M+H-CH4]           | 94  |
| 527504.9 | 425692.2 | [36][M+1]+          | 70  |
| 400425.4 | 482018.4 | [M+H]+ 574          | 47  |
| 143780.2 | 160930   |                     | 119 |
| 492592.7 | 303037.9 | [M+2K-H]+           | 212 |
| 287389.7 | 439696.6 |                     | 116 |
| 161672.6 | 112786.9 |                     | 243 |
| 108384.6 | 92079.85 |                     | 217 |
| 170522.4 | 84984.73 | [1030][M+1]2+       | 18  |
| 201809.5 | 840939.7 |                     | 56  |
| 1183133  | 3341162  | [561][M]+ [M+H-CH3] | 264 |
| 401181.8 | 809246   |                     | 105 |

|          |          |                       |     |
|----------|----------|-----------------------|-----|
| 616139.2 | 79488.7  |                       | 421 |
| 83008.09 | 71150.05 | [M+H-C6H8]            | 47  |
| 10250071 | 14013737 | [1574][M]+ [M+K]+ 110 | 11  |
| 1952046  | 7239573  | [618][M+1]+           | 81  |
| 997787.8 | 984887.1 | [867][M+1]+           | 391 |
| 7105259  | 5181500  | [M+2H]2+              | 191 |
| 2373439  | 7645255  |                       | 1   |
| 214684.2 | 922889.8 | [985][M+1]+           | 226 |
| 2795884  | 1325221  | [1091][M]+ [M+K]+ 52  | 127 |
| 2702255  | 3385838  |                       | 183 |
| 261326.1 | 329328.3 | [819][M+1]+           | 359 |
| 329519.9 | 525729.6 | [M+3K-H]2             | 47  |
| 614163.4 | 1045159  | [65][M+1]+            | 204 |
| 135664   | 750938.7 |                       | 139 |
| 158414.2 | 96427.62 |                       | 18  |
| 7232594  | 94738612 |                       | 1   |
| 1601358  | 1160450  | [1013][M+1]2+         | 211 |
| 992791.5 | 5827890  | [1199][M+1]2+         | 11  |
| 248775.2 | 196283.4 |                       | 85  |
| 1525102  | 1135879  | [M+2K-H]+             | 76  |
| 253735   | 184635.4 | [M+Na]+ 4             | 272 |
| 1789407  | 1593088  | [516][M]+ [M+2Na-H]   | 72  |
| 338569.7 | 484689.1 |                       | 419 |
| 40502.44 | 46672.85 | [392][M+1]+           | 18  |
| 8115035  | 61217798 | [284][M]+             | 97  |
| 1152601  | 21354045 | [78][M+1]+            | 91  |
| 31562.66 | 24689.31 |                       | 46  |
| 0        | 291366.1 | [M+H+HCC              | 55  |
| 20930160 | 1.78E+08 |                       | 1   |
| 425932.1 | 10482071 |                       | 9   |
| 366630.2 | 13639314 |                       | 1   |
| 1208522  | 2756738  |                       | 2   |
| 356306.2 | 366597.8 | [1157][M]+            | 300 |
| 4676098  | 6705477  | [1214][M+2]+          | 73  |
| 247150.9 | 461622.4 |                       | 133 |
| 9796233  | 2058795  | [1122][M]+ [M+Na]+ 5  | 153 |
| 3819664  | 707088.8 |                       | 174 |
| 1484956  | 1826518  | [628][M+1]+           | 174 |
| 26427.41 | 1952296  |                       | 127 |
| 91056.04 | 380573   | [198][M+2]+           | 112 |
| 2479092  | 5153029  | [1532][M]+            | 7   |
| 293557   | 132497.5 |                       | 105 |
| 471861.3 | 17319293 |                       | 1   |
| 1342393  | 292286.1 |                       | 18  |
| 289123.9 | 375119.8 |                       | 186 |
| 390169.9 | 494991.3 |                       | 334 |
| 28593732 | 96296880 |                       | 2   |



|          |          |                       |     |
|----------|----------|-----------------------|-----|
| 617495.8 | 231496.4 |                       | 15  |
| 1423486  | 1825869  | [801][M]2+            | 252 |
| 818395.9 | 427015.4 | [421][M+1]+           | 319 |
| 9271111  | 36712725 |                       | 6   |
| 1444272  | 4508126  | [216][M]2+            | 10  |
| 526110.3 | 3088576  | [383][M+2]2+          | 10  |
| 181654.3 | 262199.1 | [M+K]+ 178            | 103 |
| 839134.8 | 319319.3 |                       | 62  |
| 334621.7 | 2201373  |                       | 233 |
| 1486279  | 931848.6 | [606][M]+             | 286 |
| 335488.6 | 459181   |                       | 244 |
| 606541.6 | 357572.8 |                       | 14  |
| 3659641  | 67758732 |                       | 1   |
| 2249640  | 2306610  | [535][M+1]+           | 4   |
| 321640   | 448280.8 | [612][M+1]+           | 269 |
| 463922   | 274081.7 | [597][M+1]+           | 26  |
| 1818392  | 2233539  | [1416][M]+            | 45  |
| 1767618  | 1594246  |                       | 147 |
| 131622.2 | 1642161  |                       | 73  |
| 651993.3 | 1144099  | [258][M+1]2+          | 73  |
| 1683924  | 1029693  |                       | 143 |
| 356059.1 | 454944.8 |                       | 393 |
| 3028802  | 1699170  | [1038][M+1]+          | 190 |
| 804674.4 | 720205.3 |                       | 41  |
| 1761906  | 23559476 |                       | 1   |
| 27379.21 | 757374.9 | [487][M+1]+           | 209 |
| 1436545  | 1527406  | [1310][M+1]+          | 104 |
| 194680.4 | 267441.5 | [M+H]+ 221            | 127 |
| 740420.1 | 914009.3 |                       | 116 |
| 539887.1 | 437863.5 |                       | 55  |
| 13329779 | 27394611 | [M+2H]2+              | 173 |
| 358215.5 | 12022981 |                       | 1   |
| 747953.3 | 443156.2 |                       | 134 |
| 4067796  | 2606617  | [M+Na]+ 31            | 104 |
| 58615.7  | 119604.5 |                       | 61  |
| 230300.7 | 493590.4 |                       | 303 |
| 2141051  | 2095921  |                       | 334 |
| 630709.9 | 1364247  |                       | 10  |
| 10770331 | 17082387 |                       | 1   |
| 289041.4 | 3305224  | [M+Na]+ 41            | 104 |
| 52482023 | 70643925 | [1215][M]+ [M+H]+ 611 | 109 |
| 153918.3 | 2854886  | [447][M+1]2+          | 1   |
| 121825.7 | 254921.4 | [93][M+2]2+           | 159 |
| 21245552 | 16444346 | [1225][M]+ [M+2K-H]+  | 47  |
| 118576.6 | 65779.87 | [489][M+1]+           | 105 |
| 589984.3 | 110779.1 |                       | 222 |
| 2112046  | 8788094  | [383][M]2+            | 10  |

|          |          |                      |     |
|----------|----------|----------------------|-----|
| 305440.6 | 101638.4 | [M+K]+ 40            | 157 |
| 169415   | 151050.5 |                      | 349 |
| 3298534  | 15840534 | [M+Na+NH             | 11  |
| 825049.9 | 12512698 |                      | 1   |
| 5067365  | 5516335  | [1498][M]+           | 175 |
| 710368.7 | 150335.3 |                      | 256 |
| 1267501  | 18372186 |                      | 1   |
| 107008.2 | 2174684  | [M+K+NaCl            | 209 |
| 1644328  | 2012032  | [63][M]+             | 179 |
| 279641   | 310261.3 |                      | 149 |
| 1509349  | 998336.3 | [471][M+1]+          | 143 |
| 313908.4 | 364597.4 |                      | 320 |
| 1251161  | 983402.5 | [763][M+3]+          | 95  |
| 254182.1 | 688483.8 | [M+K+NH3             | 264 |
| 1800065  | 1953522  |                      | 33  |
| 134783.5 | 232860   | [M+H+CF3(            | 169 |
| 453672.1 | 148507.3 | [M+Na]+ 6            | 29  |
| 3157042  | 2197410  | [826][M+1]+          | 62  |
| 813727   | 893363.4 |                      | 236 |
| 64037423 | 1710218  |                      | 32  |
| 203210.9 | 195533.7 | [30][M+1]+           | 106 |
| 1889489  | 1616121  | [1428][M+2]+         | 175 |
| 518074.9 | 386260.7 | [M+H-C4H8            | 34  |
| 72979.7  | 132775.1 |                      | 255 |
| 8788691  | 1.36E+08 |                      | 1   |
| 3571212  | 15347266 |                      | 11  |
| 427341.8 | 848122.7 | [3M+2H]2+            | 283 |
| 174786.4 | 154953.9 | [675][M+1]+          | 123 |
| 3246048  | 24818999 |                      | 1   |
| 826122.6 | 624574.2 | [442][M+2]+          | 14  |
| 526526.6 | 943947.5 |                      | 119 |
| 360889.7 | 750659.6 |                      | 13  |
| 124537.4 | 248633.4 | [271][M+1]+          | 124 |
| 1212853  | 6527356  | [951][M+2]+          | 65  |
| 611731   | 369315.7 |                      | 25  |
| 4254283  | 45831575 | [373][M+1]2+         | 1   |
| 2452524  | 25319899 |                      | 1   |
| 8829708  | 12186197 |                      | 198 |
| 24438475 | 20793297 | [1218][M]+ [M+H-CO2] | 29  |
| 442613.1 | 341729.2 | [M+K+NH3             | 134 |
| 3464494  | 2577345  |                      | 265 |
| 4111067  | 7737126  | [845][M]+            | 155 |
| 1453668  | 2083439  |                      | 11  |
| 10460135 | 1.62E+08 | [119][M]+            | 91  |
| 1955586  | 22845281 |                      | 1   |
| 2335869  | 2219003  | [1394][M]+           | 313 |
| 49019.26 | 1183477  | [M+Na]+ 3            | 104 |

|          |          |                                               |     |
|----------|----------|-----------------------------------------------|-----|
| 5932283  | 5372800  | [M+2H] <sup>2+</sup>                          | 246 |
| 252453.7 | 516463.6 | [623][M+2] <sup>+</sup>                       | 49  |
| 7374892  | 6383069  | [795][M] <sup>+</sup> [M+K+HCO                | 23  |
| 41204.23 | 133468.9 |                                               | 284 |
| 168604.7 | 223262.5 | [805][M+1] <sup>+</sup>                       | 116 |
| 368673.3 | 292866.7 | [M+2H-NH                                      | 191 |
| 75408.05 | 59577.41 |                                               | 34  |
| 37817.94 | 1213913  | [M+H+HCC                                      | 155 |
| 2054999  | 5476886  |                                               | 10  |
| 4715571  | 5006603  | [M+H] <sup>+</sup> + 24                       | 8   |
| 125839.4 | 3652867  | [M+K+NH <sub>3</sub>                          | 55  |
| 486737.2 | 454380.5 |                                               | 167 |
| 381705.6 | 141210.1 |                                               | 120 |
| 8446236  | 5394336  |                                               | 100 |
| 37702.54 | 676798.5 | [81][M+2] <sup>+</sup>                        | 199 |
| 220240.1 | 531139.8 |                                               | 73  |
| 469380.1 | 734982.9 | [267][M+2] <sup>+</sup>                       | 47  |
| 379448.4 | 3002785  | [M+K] <sup>+</sup> + 58                       | 76  |
| 3059883  | 3490643  | [101][M] <sup>+</sup> [M+H] <sup>+</sup> + 25 | 298 |
| 192938.5 | 184032.3 | [43][M+2] <sup>+</sup>                        | 223 |
| 2011187  | 3548175  | [134][M+1] <sup>+</sup>                       | 119 |
| 417330.4 | 378494.1 | [M+K+NaC                                      | 49  |
| 6222094  | 1319196  | [718][M] <sup>+</sup>                         | 20  |
| 23682.83 | 96113.53 |                                               | 101 |
| 5476088  | 3562385  | [421][M] <sup>+</sup> [M+K] <sup>+</sup> + 31 | 319 |
| 2855489  | 13205467 | [372][M+1] <sup>2+</sup>                      | 1   |
| 152721.5 | 384911.1 |                                               | 167 |
| 11363600 | 8060167  | [M+2H] <sup>2+</sup>                          | 104 |
| 761703.3 | 1253744  | [218][M+1] <sup>2+</sup>                      | 138 |
| 3929259  | 4812587  | [404][M] <sup>+</sup>                         | 374 |
| 20229939 | 26707332 | [441][M] <sup>+</sup> [M+Na] <sup>+</sup> + 3 | 8   |
| 184313.8 | 413853.1 |                                               | 147 |
| 176354.1 | 150699.5 |                                               | 245 |
| 693121   | 929947.8 | [749][M+3] <sup>+</sup>                       | 2   |
| 1914045  | 4965743  | [1559][M] <sup>2+</sup>                       | 1   |
| 637076.8 | 1690615  | [M+H] <sup>+</sup> + 28                       | 26  |
| 2.63E+08 | 4.98E+08 |                                               | 1   |
| 162673.3 | 149068.3 |                                               | 76  |
| 317443.2 | 1260456  | [816][M+1] <sup>+</sup>                       | 11  |
| 71814.34 | 272235.7 | [M+K] <sup>+</sup> + 49                       | 160 |
| 615739.5 | 307538   |                                               | 188 |
| 18348188 | 36165863 | [366][M] <sup>+</sup>                         | 204 |
| 58043670 | 1.82E+08 |                                               | 2   |
| 434186.1 | 521933.2 |                                               | 405 |
| 91518.33 | 203012.8 | [M+Na+NH                                      | 52  |
| 348803.1 | 254278.7 |                                               | 115 |
| 2793875  | 3685275  | [203][M+1] <sup>+</sup>                       | 228 |

|          |          |                      |     |
|----------|----------|----------------------|-----|
| 119410.1 | 71928.38 | [16][M+1]+           | 55  |
| 112232.1 | 286314.6 | [M+Na]+ 30           | 51  |
| 350838.3 | 125481.2 |                      | 65  |
| 215846   | 966617.2 |                      | 45  |
| 555369.1 | 400664.5 |                      | 119 |
| 260844.2 | 88157.81 | [M+2Na-H]            | 118 |
| 66503.33 | 152145.2 |                      | 105 |
| 159203.5 | 47394.69 | [1152][M+1]+         | 249 |
| 259835   | 196345.4 |                      | 35  |
| 42323.68 | 527270.1 | [2M+Na+3I            | 172 |
| 87454.17 | 173309.9 | [M+H+CF3(            | 95  |
| 557648.4 | 2816008  |                      | 73  |
| 382362.6 | 96665.36 |                      | 87  |
| 79751.71 | 150488.2 |                      | 151 |
| 990816.7 | 1004304  | [1329][M+1]+         | 223 |
| 8448.613 | 435384.9 |                      | 233 |
| 470562.5 | 406590.2 | [676][M+1]2+         | 266 |
| 50713083 | 1.73E+08 | [1292][M]+           | 1   |
| 63633107 | 19245741 | [1319][M]+ [2M+2Na+I | 4   |
| 238485.6 | 144138.4 |                      | 100 |
| 762868.4 | 35578.24 |                      | 125 |
| 1354342  | 1967889  | [944][M+1]2+         | 13  |
| 1686158  | 1037951  | [13][M+1]+           | 104 |
| 80303.83 | 92059.11 |                      | 138 |
| 52027.52 | 252400.3 |                      | 427 |
| 9579447  | 10334932 | [905][M]+            | 330 |
| 784596.1 | 2923830  |                      | 104 |
| 412364.7 | 2566795  |                      | 104 |
| 18643007 | 26148683 | [465][M+2]+          | 11  |
| 1167139  | 829896.3 |                      | 29  |
| 556401.9 | 500656.6 |                      | 470 |
| 5588775  | 4575213  | [867][M]+ [M+H+NH3   | 391 |
| 20394.93 | 1753819  |                      | 97  |
| 832226.6 | 845726.3 | [1070][M]3+          | 443 |
| 214512.1 | 275401.5 |                      | 105 |
| 10970825 | 771826.7 |                      | 29  |
| 1143982  | 1203126  | [1048][M]2 [3M+Na+K] | 29  |
| 78252.25 | 101220.7 |                      | 356 |
| 2611366  | 1993007  | [597][M]+ [M+Na]+ 3' | 26  |
| 532959.8 | 3413832  | [534][M]+ [M+H-C2H4  | 49  |
| 1537998  | 11583161 | [54][M]2+ [M+2H]2+ , | 4   |
| 50097.79 | 111445.6 |                      | 221 |
| 333705   | 469823.3 | [M+H]+ 42,           | 172 |
| 798406   | 460633.6 | [M+Na+HC             | 119 |
| 69467.26 | 521739.6 |                      | 26  |
| 157159   | 70199.23 | [1249][M+1]2+        | 202 |
| 459328.3 | 210384.9 | [1152][M]+           | 249 |

|          |          |                       |     |
|----------|----------|-----------------------|-----|
| 91271.17 | 101528.5 | [896][M+1]+           | 196 |
| 1180340  | 11620880 | [504][M]2+            | 1   |
| 210460.8 | 215684.4 | [308][M+1]+           | 245 |
| 75611.34 | 667197.1 |                       | 300 |
| 375956.6 | 533827   |                       | 289 |
| 67806.85 | 1790209  |                       | 97  |
| 1500430  | 1644310  |                       | 10  |
| 1239839  | 916443.8 | [608][M+1]+           | 4   |
| 66242371 | 92955744 | [21][M]+              | 17  |
| 1464723  | 11569983 | [462][M]+             | 104 |
| 1281172  | 978518.4 | [1470][M+1]+          | 143 |
| 505790.9 | 635424.8 | [3M+2Na]2             | 104 |
| 352288.3 | 3748284  |                       | 104 |
| 1925927  | 2302157  | [563][M]+             | 20  |
| 57971570 | 76827908 | [102][M]+             | 93  |
| 1913377  | 7338829  |                       | 1   |
| 1906663  | 20064185 |                       | 1   |
| 122218.4 | 130634.7 |                       | 116 |
| 155047.6 | 2141483  |                       | 124 |
| 1487353  | 215249   | [1044][M]+ [M+K+NH3   | 206 |
| 805767.2 | 12469189 |                       | 172 |
| 1363094  | 4244783  | [1123][M+1]+          | 26  |
| 480379.8 | 1991481  | [3M+2H]2+             | 49  |
| 307037.3 | 205385.8 | [1539][M+2]+          | 100 |
| 804476.1 | 994956.6 | [M+Na]+ 4             | 199 |
| 19753.55 | 1048827  |                       | 104 |
| 1739066  | 4728247  | [M+3H-CH <sub>2</sub> | 11  |
| 11345426 | 1.4E+08  |                       | 1   |
| 2591096  | 35078400 |                       | 1   |
| 12727910 | 22629323 | [66][M]+              | 190 |
| 2760387  | 50449034 | [339][M+1]3+          | 1   |
| 3432870  | 27901925 | [415][M]2+            | 1   |
| 489365.7 | 950002.1 |                       | 245 |
| 426649.6 | 8166305  |                       | 133 |
| 50978634 | 2511572  | [472][M+2]2+          | 1   |
| 228705.2 | 320588.9 |                       | 119 |
| 130103.6 | 218792.7 |                       | 243 |
| 545139.3 | 487247.4 | [265][M+1]+           | 243 |
| 1.21E+08 | 1.75E+08 |                       | 1   |
| 28986681 | 1.05E+08 |                       | 1   |
| 3628.979 | 1167884  | [1263][M+1]+          | 4   |
| 406681.6 | 824036.5 |                       | 19  |
| 443918.6 | 485602.7 |                       | 167 |
| 1102143  | 1183961  |                       | 1   |
| 348208.8 | 618865.2 | [1171][M+1]+          | 10  |
| 23497.59 | 97449.01 |                       | 61  |
| 140559.9 | 738843   | [M+Na]+ 2             | 107 |

|          |          |                       |     |
|----------|----------|-----------------------|-----|
| 191218.2 | 472574.4 |                       | 149 |
| 260564.9 | 2526036  | [306][M+2]+           | 152 |
| 1939873  | 7148445  | [1524][M+1]+          | 11  |
| 5469873  | 6078885  | [M+H]+ 37!            | 137 |
| 1974188  | 1840302  |                       | 133 |
| 314960.7 | 1650911  |                       | 56  |
| 5186385  | 9981513  | [M+K]+ 33!            | 225 |
| 69845.15 | 235073.7 |                       | 159 |
| 115902.6 | 1392061  | [M+Na]+ 4!            | 65  |
| 6765141  | 5894803  | [1218][M+1]+          | 29  |
| 7475.736 | 739163.1 |                       | 91  |
| 302993.3 | 204457.7 |                       | 20  |
| 123038.7 | 160982.3 | [905][M+2]+           | 330 |
| 2104907  | 1572802  | [1181][M+1]+          | 17  |
| 328666.8 | 120543.4 |                       | 162 |
| 540502.1 | 580807.4 |                       | 54  |
| 526055   | 2545417  | [M+H-CO]+             | 18  |
| 4558057  | 17644445 | [1524][M]+ [M+K]+ 86! | 11  |
| 355282   | 231909.1 | [3M+H+K]2             | 18  |
| 133793.1 | 117701.7 |                       | 321 |
| 8832393  | 67937339 |                       | 1   |
| 572085.4 | 478776.4 |                       | 211 |
| 5532770  | 6819992  | [571][M+2]+           | 37  |
| 224442   | 324194.7 | [226][M+1]+           | 376 |
| 594286.7 | 7563355  |                       | 1   |
| 3803378  | 1033458  | [1130][M+1]2+         | 18  |
| 217401.6 | 88060.28 | [M+H]+ 34!            | 22  |
| 1297802  | 276284.6 | [718][M+1]+           | 20  |
| 810514   | 432868.9 | [371][M+1]+           | 272 |
| 193989.4 | 3888818  | [374][M+2]2+          | 1   |
| 406645.7 | 797866.3 |                       | 61  |
| 71121.65 | 1707177  | [M+Na]+ 4!            | 133 |
| 1753866  | 2661699  |                       | 28  |
| 1077105  | 1096683  | [1471][M+2]+          | 175 |
| 240148.8 | 309965.2 |                       | 113 |
| 1823526  | 19993682 | [339][M+2]3+          | 1   |
| 1.56E+08 | 3.12E+08 | [1230][M+1]+          | 10  |
| 542281.3 | 174733.8 |                       | 233 |
| 4257298  | 4224653  | [757][M]+             | 370 |
| 505355.3 | 2151905  |                       | 19  |
| 21795942 | 13898289 | [251][M]+             | 233 |
| 443663.7 | 3930857  | [2M+3H]3+             | 209 |
| 8367278  | 5917455  | [M+2H]2+ :            | 260 |
| 1214998  | 753945.1 | [1110][M+1]+          | 314 |
| 399186.5 | 392300.4 | [M+H]+ 47!            | 15  |
| 86018.06 | 185925.3 |                       | 276 |
| 775656.2 | 8638501  | [3M+2K]2+             | 104 |

|          |          |                     |     |
|----------|----------|---------------------|-----|
| 1869262  | 2265204  | [577][M]+           | 20  |
| 24222.19 | 319956   |                     | 269 |
| 332838.8 | 1221788  | [216][M+1]2+        | 10  |
| 394109.3 | 1028490  |                     | 2   |
| 141699.3 | 198025.7 | [65][M+2]+          | 204 |
| 1668817  | 1153386  | [M+K]+ 56'          | 75  |
| 428996.2 | 399830.2 | [1074][M+1]+        | 360 |
| 1144772  | 1598241  | [M+K+HCO            | 104 |
| 940355.6 | 1713970  |                     | 179 |
| 61030750 | 72806412 | [571][M+1]+         | 37  |
| 166675.5 | 236247.3 |                     | 185 |
| 658416.1 | 1130628  |                     | 21  |
| 1825665  | 2803204  |                     | 9   |
| 476722.6 | 272064.5 | [616][M+2]+         | 90  |
| 464306.4 | 694802.1 |                     | 181 |
| 67308.2  | 1031918  | [M+H+CF3(           | 55  |
| 5871064  | 20098772 | [50][M]+ [M+Na]+ 2( | 209 |
| 7605687  | 33933662 | [59][M+2]2+         | 4   |
| 848569.7 | 8992698  |                     | 1   |
| 1776846  | 1291986  |                     | 159 |
| 256792.8 | 737906.9 |                     | 114 |
| 148975.5 | 196992.2 | [121][M+1]2+        | 107 |
| 623091.8 | 17917355 |                     | 1   |
| 251168.2 | 270036.8 | [M+K]+ 43'          | 18  |
| 142315.3 | 743732.6 | [48][M+1]2+         | 20  |
| 1330438  | 3847977  | [855][M+1]+         | 2   |
| 84297.86 | 43547.91 | [1110][M+2]+        | 314 |
| 51654    | 346170   | [M+H+HCC            | 104 |
| 0        | 398981.4 |                     | 124 |
| 1005992  | 1030294  |                     | 204 |
| 23194597 | 1.02E+08 | [M+H]+ 42'          | 4   |
| 597306.4 | 213452.1 |                     | 55  |
| 21466081 | 24749958 | [11][M]+            | 4   |
| 1343374  | 3818734  |                     | 258 |
| 466987.8 | 11079027 | [656][M]+           | 97  |
| 101677.2 | 19345.44 |                     | 241 |
| 213392   | 574067.1 |                     | 308 |
| 6307380  | 4532258  | [1225][M+1]+        | 47  |
| 425681   | 905747.4 | [366][M+2]+         | 204 |
| 316493.8 | 3793973  | [477][M+2]+         | 1   |
| 2.52E+08 | 2.92E+08 | [571][M]+           | 37  |
| 315460.7 | 696271.6 |                     | 167 |
| 2614637  | 32028939 | [661][M]+           | 104 |
| 924976   | 1435245  | [759][M+1]3+        | 2   |
| 718028.3 | 1519575  |                     | 119 |
| 221338.1 | 608768.4 | [1272][M+1]+        | 26  |
| 588138.1 | 383549.9 | [1377][M+2]+        | 29  |

|          |          |                       |     |
|----------|----------|-----------------------|-----|
| 1161352  | 11812203 |                       | 1   |
| 308602.3 | 116734.2 | [1261][M+1]+          | 104 |
| 327732.1 | 292390.1 |                       | 327 |
| 541709.4 | 435638.9 | [1064][M+2]+          | 96  |
| 41194.68 | 42193.75 |                       | 138 |
| 5757233  | 12061916 | [M+H]+ 37:            | 173 |
| 1180615  | 3655330  | [M+H-C2H4             | 11  |
| 3468843  | 3029601  | [M+H]+ 21:            | 104 |
| 336186.4 | 121969.7 |                       | 332 |
| 1747269  | 1636201  | [1216][M]+ [M+H]+ 61: | 29  |
| 583938.4 | 550250.6 |                       | 219 |
| 252021.8 | 140950   | [M+Na]+ 30:           | 214 |
| 74859998 | 1.47E+08 |                       | 1   |
| 4224442  | 4121349  | [237][M+1]+           | 213 |
| 1048523  | 1833859  | [845][M+1]+           | 155 |
| 604701.5 | 356674   | [1300][M+1]+          | 107 |
| 4218551  | 4304999  | [1310][M]+ [M+Na]+ 6: | 104 |
| 27616132 | 31726006 | [60][M]+              | 4   |
| 892477.2 | 795127.7 | [M+K]+ 35:            | 217 |
| 2757849  | 2792151  | [24][M]+ [M+K+HCO     | 78  |
| 704593.1 | 68282.7  | [M+K]+ 49:            | 206 |
| 369463.9 | 623250.8 |                       | 465 |
| 4382929  | 4333564  |                       | 1   |
| 1994026  | 1328209  |                       | 191 |
| 844456.8 | 785519.5 | [M+H]+ 59:            | 213 |
| 2356852  | 3379753  |                       | 4   |
| 119272.3 | 161863.1 | [M+H-C3H3             | 284 |
| 919732.3 | 1147530  | [129][M+1]+           | 37  |
| 1839219  | 12966107 |                       | 1   |
| 302859.3 | 239641.8 |                       | 175 |
| 3143000  | 16131734 |                       | 12  |
| 931954.9 | 2296711  |                       | 104 |
| 154284.1 | 200147.8 | [1147][M+2]+          | 29  |
| 276407.7 | 401193.7 |                       | 190 |
| 261403   | 532242.7 |                       | 147 |
| 132909.2 | 241115.7 |                       | 338 |
| 6923809  | 10149218 | [1506][M]+ [2M+K]+ 4: | 11  |
| 276598.1 | 413476.6 | [M+H-C3H3             | 29  |
| 50029.98 | 767308.3 |                       | 90  |
| 513197   | 453370   |                       | 354 |
| 203781.4 | 395432.4 | [M+Na+Na              | 281 |
| 528106.3 | 1770637  | [171][M+2]+           | 199 |
| 620453.6 | 7177941  |                       | 25  |
| 8763066  | 10794276 |                       | 4   |
| 5604219  | 4183916  | [M+2H]2+ :            | 202 |
| 4745041  | 25950657 |                       | 104 |
| 240792.4 | 487612.7 | [1507][M+1]+          | 113 |



|          |          |                       |     |
|----------|----------|-----------------------|-----|
| 280502.9 | 115673.7 |                       | 329 |
| 3942008  | 2354261  | [1110][M]+            | 314 |
| 618057.3 | 342972.2 |                       | 29  |
| 802295.1 | 1600283  | [M+K]+ 369            | 49  |
| 215799.6 | 156448.6 |                       | 70  |
| 733757.3 | 2242538  | [913][M+1]2+          | 2   |
| 1912554  | 22312661 | [M+Na+HC              | 104 |
| 1533993  | 9165899  | [357][M]+             | 73  |
| 11193938 | 24736341 | [100][M]+             | 290 |
| 1149013  | 2384568  |                       | 70  |
| 6712816  | 20083392 | [1123][M]+ [M+Na]+ 5! | 26  |
| 906276.1 | 20813192 | [393][M]+             | 55  |
| 356026.6 | 682882.6 | [623][M]+ [M+Na]+ 3!  | 49  |
| 6528054  | 3410036  | [3M+3Na+H             | 104 |
| 1175402  | 262276.5 |                       | 113 |
| 74392.94 | 238438.2 |                       | 11  |
| 4215889  | 2086972  | [937][M]+             | 66  |
| 170252   | 297018   | [3M+2K-H]             | 55  |
| 927881.4 | 373813.3 | [M+Na]+ 5!            | 25  |
| 1070630  | 439801.3 | [M+Na]+ 3!            | 112 |
| 248175.1 | 3190390  |                       | 91  |
| 759999.2 | 7353510  |                       | 303 |
| 171424   | 6769090  |                       | 1   |
| 524873.2 | 364180.9 |                       | 151 |
| 1047858  | 1282025  |                       | 20  |
| 1328708  | 1755862  | [144][M+1]+           | 178 |
| 7679205  | 52769265 |                       | 1   |
| 3504646  | 5262213  |                       | 290 |
| 1761407  | 613611.6 | [M+H]+ 37!            | 171 |
| 140883.6 | 113443   |                       | 181 |
| 348635.4 | 2976326  | [M+H]+ 18!            | 133 |
| 592688.8 | 2092415  | [M+H]+ 30!            | 65  |
| 96639.47 | 267634   |                       | 245 |
| 40106.92 | 55745.66 |                       | 138 |
| 2947274  | 6329774  |                       | 279 |
| 861207.9 | 1542741  | [1280][M+1]+          | 28  |
| 361863.5 | 472199.9 |                       | 325 |
| 707320.4 | 357390.3 |                       | 245 |
| 774427.9 | 530320.1 |                       | 376 |
| 124305.4 | 45609.72 | [M+2K-H]+             | 107 |
| 99821.77 | 1113755  |                       | 95  |
| 2706982  | 5432505  | [853][M+1]+           | 2   |
| 155022.1 | 342482   |                       | 304 |
| 55685.65 | 345445   | [756][M+1]+           | 106 |
| 177954.4 | 288918.5 | [183][M+1]+           | 315 |
| 2176884  | 28415792 |                       | 1   |
| 288285.4 | 373034.8 |                       | 253 |

|          |          |              |     |
|----------|----------|--------------|-----|
| 326719   | 209818.9 | [1137][M+1]+ | 114 |
| 393325.2 | 1189938  |              | 2   |
| 28613.84 | 1616403  |              | 172 |
| 557460   | 17009955 |              | 1   |
| 2354761  | 3301410  | [94][M+1]2+  | 2   |
| 772383.4 | 460956.7 | [M+H]+ 24:   | 94  |
| 159185.2 | 1943742  | [2M+H]+ 1:   | 88  |
| 1040958  | 7080247  | [M+K]+ 57:   | 18  |
| 163827.6 | 153302.3 | [935][M+1]+  | 229 |
| 1917789  | 1893666  | [145][M]+    | 105 |
| 4001878  | 8599859  | [1574][M+1]+ | 11  |
| 7399264  | 8153386  | [499][M]+    | 37  |
| 1056102  | 6521980  | [1263][M]+   | 4   |
| 2209759  | 1632586  | [M+H-CH2]    | 64  |
| 154363.8 | 90803.53 |              | 409 |
| 846206.3 | 767808.6 | [M+H-C4H8]   | 237 |
| 177970.1 | 140659.3 |              | 283 |
| 2.99E+09 | 4.08E+09 |              | 2   |
| 1039280  | 1376617  | [639][M+2]+  | 119 |
| 2314553  | 3500948  | [1027][M+1]+ | 128 |
| 1268098  | 974287.5 |              | 130 |
| 4.1E+08  | 8.48E+08 | [1230][M]+   | 10  |
| 371039.9 | 133880.4 | [3M+K]+ 2:   | 25  |
| 155661.6 | 273805.8 |              | 231 |
| 2648997  | 1517199  |              | 55  |
| 1537024  | 6995170  | [1506][M+1]+ | 11  |
| 104101   | 86103.41 | [1441][M+1]+ | 34  |
| 178538.1 | 854508.2 | [M+Na]+ 4:   | 55  |
| 25368122 | 1975087  | [1347][M]+   | 2   |
| 1340539  | 1352125  | [753][M]2+   | 32  |
| 1340281  | 19919436 |              | 1   |
| 305018.4 | 374451   | [3M+K]+ 2:   | 284 |
| 10228471 | 12230178 | [M+H+NH3]    | 29  |
| 63444297 | 1.3E+08  | [389][M]+    | 1   |
| 833284.3 | 17650154 |              | 1   |
| 5284084  | 6393741  | [3M+2Na]2    | 8   |
| 39386.33 | 168926.8 | [M+K+NH3]    | 34  |
| 2589999  | 17040974 | [1199][M]2+  | 11  |
| 190661.6 | 1203494  | [M+2H]2+     | 49  |
| 513628.3 | 703452.6 | [509][M+2]+  | 257 |
| 665559.6 | 309447.3 |              | 29  |
| 1082901  | 106281.9 | [M+H-CH2]    | 249 |
| 3266464  | 2338615  | [1470][M]+   | 143 |
| 1054096  | 3352946  | [M+H-H2O]    | 65  |
| 331598.6 | 273570.4 |              | 397 |
| 1141502  | 787081.4 | [999][M]+    | 41  |
| 486611.3 | 229456   | [1114][M+3]+ | 47  |

|          |          |                       |     |
|----------|----------|-----------------------|-----|
| 320424.3 | 1389016  | [76][M+1]+            | 55  |
| 3609280  | 4952701  | [1409][M]+ [M+H]+ 74: | 104 |
| 139949.3 | 3034642  | [M+Na]+ 3:            | 172 |
| 836834   | 626132.2 | [M+Na]+ 2:            | 65  |
| 1679363  | 6467012  | [1570][M+4]2+         | 11  |
| 83152.64 | 10094.31 |                       | 268 |
| 4840615  | 5024505  | [1468][M]+            | 217 |
| 9150279  | 11126331 | [18][M]+              | 97  |
| 5299859  | 4195516  | [789][M]+ [M+K]+ 42:  | 52  |
| 311595.6 | 383186   |                       | 459 |
| 170378.2 | 169965.3 | [214][M+1]+           | 199 |
| 567754.2 | 4003767  | [M+H]+ 15:            | 180 |
| 98536897 | 3.68E+08 | [475][M+2]+           | 1   |
| 3762415  | 3122427  |                       | 260 |
| 286996.6 | 198801.1 | [286][M+2]+           | 17  |
| 4002730  | 864478.2 | [1512][M]+ [M+Na]+ 8: | 18  |
| 7212229  | 5461861  | [600][M+3]+           | 4   |
| 660247.4 | 3227449  | [M+Na]+ 3:            | 172 |
| 782599.6 | 98219.63 |                       | 244 |
| 755345.7 | 653476.9 |                       | 69  |
| 2840535  | 1854175  | [1487][M]+ [M+H]+ 82: | 325 |
| 1.45E+09 | 6.82E+09 | [475][M]+             | 1   |
| 1851641  | 30477484 | [108][M]+             | 208 |
| 8327231  | 39697037 |                       | 1   |
| 1866906  | 1453131  | [1057][M]2+           | 201 |
| 5016542  | 6589807  |                       | 1   |
| 20012993 | 13106938 | [1069][M]+            | 2   |
| 3133406  | 6535717  | [366][M+1]+           | 204 |
| 256706.1 | 214742.4 |                       | 69  |
| 1301197  | 1540700  | [499][M+1]+           | 37  |
| 562237.1 | 569896.3 |                       | 227 |
| 171653.9 | 2914106  | [M+K+CF3C             | 104 |
| 102491.7 | 226107   |                       | 253 |
| 74759.81 | 140495.7 | [550][M+1]+           | 169 |
| 947548.5 | 20897261 |                       | 1   |
| 160378.3 | 301140.3 | [M+H-C6H:             | 169 |
| 3396892  | 6451377  |                       | 70  |
| 332064.6 | 2457451  | [M+H]+ 29:            | 208 |
| 2792736  | 2931023  | [45][M]+ [M+H-C4H:    | 16  |
| 79949.76 | 242376.7 | [791][M+1]+           | 95  |
| 2668213  | 6410275  | [926][M+1]+           | 2   |
| 745856.7 | 438330.6 | [1103][M+1]+          | 66  |
| 21175751 | 1.71E+08 |                       | 1   |
| 2304289  | 4424463  |                       | 2   |
| 2.18E+08 | 3.19E+08 | [465][M+1]+           | 11  |
| 358667.6 | 775348.8 | [M+H-C4H:             | 49  |
| 111802.2 | 315134.4 | [1369][M+1]+          | 321 |

|          |          |                       |     |
|----------|----------|-----------------------|-----|
| 2037269  | 1934122  | [M+K]+ 28             | 16  |
| 4160261  | 3507202  | [717][M]+             | 236 |
| 2160802  | 3034387  | [M+H-H2O]             | 11  |
| 215439.2 | 965911.2 |                       | 45  |
| 323147.7 | 1803193  |                       | 172 |
| 311596.3 | 198115.2 | [M+H]+ 75             | 206 |
| 397168.7 | 424479.4 | [223][M+1]+           | 217 |
| 2760392  | 3357100  |                       | 164 |
| 9.4E+08  | 1.4E+09  | [M+H]+ 36             | 11  |
| 21134755 | 13803141 | [13][M]+              | 104 |
| 321325.4 | 6332154  |                       | 97  |
| 8209701  | 11246689 | [102][M+1]+           | 93  |
| 0        | 2457718  |                       | 311 |
| 99458.33 | 521275.4 |                       | 224 |
| 3211357  | 2527851  | [1113][M+1]+          | 176 |
| 836549   | 1964905  | [M+H]+ 69             | 333 |
| 2004355  | 3532311  | [1503][M]+            | 60  |
| 1215902  | 6874953  |                       | 233 |
| 2027095  | 3295229  | [308][M]+ [M+H-C2H    | 245 |
| 1585491  | 1398855  | [1448][M]+            | 444 |
| 1569595  | 1078894  | [987][M]+             | 293 |
| 22635.05 | 1511365  |                       | 91  |
| 55223.94 | 238405.6 | [M+K+NH3              | 199 |
| 976367.5 | 78654.69 | [1183][M+1]+          | 176 |
| 157835.5 | 62743.5  | [1127][M]2+           | 18  |
| 90133.29 | 410680.5 | [1056][M+1]+          | 71  |
| 64857.23 | 3519948  | [M+K]+ 62             | 55  |
| 3922657  | 5129040  |                       | 100 |
| 615612.4 | 638601.8 |                       | 2   |
| 58071.57 | 180296.2 |                       | 138 |
| 2501408  | 2420240  | [441][M+1]+           | 8   |
| 366851.5 | 545495   |                       | 244 |
| 7602477  | 4372045  | [862][M]2+ [M+2H]2+ ! | 257 |
| 738712.5 | 6118823  | [890][M]+             | 37  |
| 178730.9 | 28361334 |                       | 1   |
| 687277.8 | 514519.3 |                       | 217 |
| 2207442  | 1691882  |                       | 392 |
| 6275638  | 21313920 | [1570][M+1]2+         | 11  |
| 1673722  | 809692.9 | [M+K]+ 37             | 79  |
| 691992.3 | 411099.7 | [992][M]+             | 412 |
| 1502728  | 7304284  | [146][M]+ [M+K]+ 23   | 16  |
| 117822.2 | 60502.03 | [1343][M+1]+          | 34  |
| 815170.3 | 795320.7 |                       | 280 |
| 3757840  | 9862248  | [362][M+1]3+          | 1   |
| 52955715 | 5.02E+08 | [1445][M]+            | 1   |
| 216735.6 | 1861387  | [153][M+1]+           | 55  |
| 201063   | 141039.5 |                       | 114 |

|          |          |                      |     |
|----------|----------|----------------------|-----|
| 5830818  | 4208560  | [369][M]+ [M+H+NH3   | 134 |
| 13453471 | 10452394 | [1024][M]+           | 242 |
| 467915   | 1887657  |                      | 291 |
| 1079171  | 370771.7 | [1202][M+1]+         | 16  |
| 1205163  | 224746.4 | [788][M]+ [M+K]+ 420 | 202 |
| 204443.4 | 274521.3 |                      | 35  |
| 25306107 | 27719321 | [467][M]+            | 248 |
| 64628.01 | 61369.69 |                      | 47  |
| 2127896  | 320700.6 | [2M+H]+ 5:           | 18  |
| 1118949  | 15130048 |                      | 1   |
| 614311.8 | 1666301  | [1092][M]+ [M+K+CF3C | 284 |
| 2245738  | 2757096  | [M+Na+NH             | 223 |
| 286879.5 | 691576   | [883][M+2]+          | 159 |
| 763628.7 | 717679.4 |                      | 14  |
| 2206405  | 1941870  | [M+Na]+ 2:           | 156 |
| 157798   | 3303532  |                      | 1   |
| 481030.2 | 368872.5 |                      | 201 |
| 274617.8 | 671590.8 | [M+Na]+ 4:           | 215 |
| 772068   | 840158.4 |                      | 20  |
| 120185.4 | 25828.46 | [3M+2K]2+            | 47  |
| 1487341  | 2027673  | [39][M+1]+           | 228 |
| 3733023  | 272926.2 | [M+Na+NH             | 95  |
| 267761.5 | 977877.2 |                      | 124 |
| 10211095 | 30049666 | [772][M]+ [M+Na]+ 4: | 4   |
| 1155060  | 1452475  | [150][M+1]+          | 84  |
| 91070.37 | 621416.3 |                      | 110 |
| 12538883 | 5571185  | [471][M]+ [M+Na]+ 3: | 143 |
| 1954946  | 2677343  | [696][M+1]+          | 179 |
| 402134.6 | 1941708  |                      | 28  |
| 793322.1 | 840023.9 | [356][M+4]+          | 18  |
| 213071.6 | 1107971  | [M+H-CO2]            | 55  |
| 735465   | 339260.1 | [M+Na]+ 2:           | 104 |
| 400506.9 | 1782822  | [M+2K]2+ 4:          | 55  |
| 570742.9 | 476099.3 | [518][M+1]+          | 236 |
| 149087.2 | 531659.5 | [1479][M+1]+         | 49  |
| 2201662  | 2730651  |                      | 306 |
| 1080726  | 1515833  |                      | 71  |
| 3107078  | 1161255  | [1202][M]+           | 16  |
| 409556.7 | 535683.9 | [563][M+1]+          | 20  |
| 98339.3  | 841137.1 |                      | 152 |
| 1722039  | 32165391 | [681][M]+ [M+Na]+ 4: | 55  |
| 42388.77 | 858168.8 | [656][M+2]+          | 97  |
| 1077571  | 212774.4 | [1179][M+1]+         | 61  |
| 402237.3 | 300284.4 |                      | 303 |
| 1.28E+08 | 1.84E+08 | [835][M+2]+          | 2   |
| 539653.7 | 11047868 | [547][M+1]+          | 55  |
| 2591622  | 16056857 |                      | 1   |

|          |          |                       |     |
|----------|----------|-----------------------|-----|
| 407055.1 | 208088   | [1007][M+2]+          | 75  |
| 2620782  | 1598086  | [1103][M]+ [2M+Na]+   | 66  |
| 432859.6 | 8570300  |                       | 55  |
| 88291.48 | 482418.6 | [50][M+2]+            | 209 |
| 443949.1 | 157061.5 | [M+Na+K]2             | 47  |
| 5165845  | 4103020  |                       | 241 |
| 1387740  | 1378286  | [1536][M]+            | 301 |
| 10941498 | 16254948 | [1095][M]+            | 160 |
| 125753.7 | 255230   | [M+H-H2O]             | 119 |
| 298136   | 986649.1 |                       | 306 |
| 1108687  | 3758039  |                       | 26  |
| 2556320  | 2587479  | [16][M]+              | 55  |
| 859153.8 | 1168990  |                       | 288 |
| 27949795 | 61500123 | [832][M]+ [M+Na]+ 4!  | 26  |
| 2310056  | 3437482  | [162][M]+             | 17  |
| 428317.6 | 495254.7 |                       | 112 |
| 6017692  | 1.15E+08 | [547][M]+ [M+K]+ 34!  | 55  |
| 214457.8 | 3027635  | [661][M+1]+           | 104 |
| 8709259  | 11909691 | [1308][M+2]+          | 1   |
| 8206881  | 7543106  | [665][M]+             | 123 |
| 112581   | 135567.7 | [M+K]+ 41!            | 245 |
| 29082556 | 28794251 | [237][M]+ [M+H+NH3    | 213 |
| 531134.7 | 774102.6 |                       | 13  |
| 286027.4 | 1920024  |                       | 433 |
| 2682939  | 2765279  | [M+K+NH3              | 87  |
| 454575.5 | 436975.2 |                       | 381 |
| 8068883  | 9412348  | [129][M]+             | 37  |
| 12286893 | 45730047 | [59][M+1]2+           | 4   |
| 4828685  | 5162165  | [469][M]+             | 125 |
| 960169.7 | 286351   |                       | 170 |
| 1539995  | 1338442  |                       | 94  |
| 2129101  | 5555611  | [1362][M+4]+          | 1   |
| 258026.8 | 1796202  | [M+H-C2H4             | 104 |
| 483104.3 | 212137.7 |                       | 401 |
| 4193567  | 2939364  | [M+Na+NH              | 104 |
| 270040.8 | 79237.48 |                       | 453 |
| 93892.68 | 227834   |                       | 41  |
| 629072.4 | 896012.2 | [605][M]2+            | 139 |
| 1827556  | 1632288  | [1085][M]+ [M+K]+ 52! | 75  |
| 616893.1 | 398379   |                       | 239 |
| 236812.7 | 1250424  |                       | 11  |
| 1463422  | 1488950  | [109][M+1]+           | 178 |
| 241865.6 | 94928.57 |                       | 18  |
| 991774.5 | 1930054  |                       | 113 |
| 91411.98 | 221104.1 | [M+K+NaCl             | 55  |
| 43873077 | 57379706 | [1341][M]+            | 1   |
| 352913   | 1285556  |                       | 161 |

|          |          |                       |     |
|----------|----------|-----------------------|-----|
| 2335332  | 372741.9 | [M+2Na-H]             | 55  |
| 396506.9 | 4862004  | [1545][M+1]+          | 11  |
| 83744.68 | 30478.27 | [M+H-C3H2]            | 172 |
| 1017882  | 4579530  | [M+Na]+ 3:            | 109 |
| 84425776 | 1.17E+08 | [1214][M]+ [M+H]+ 61: | 73  |
| 993663.9 | 652123.7 | [1494][M+1]+          | 416 |
| 554666.1 | 1921213  | [M+H+HCC              | 26  |
| 487471.6 | 870049.5 |                       | 8   |
| 115432.8 | 110759.7 |                       | 18  |
| 144163   | 221680.3 | [M+Na]+ 3:            | 116 |
| 2467306  | 2964911  |                       | 117 |
| 10089879 | 1.15E+08 |                       | 1   |
| 7286308  | 8816117  |                       | 88  |
| 13744.39 | 2387160  | [M+H-C3H2]            | 199 |
| 64911.53 | 446440.4 | [M+K+NaCl             | 107 |
| 1395929  | 1346108  |                       | 355 |
| 13183070 | 62611879 |                       | 11  |
| 445211   | 1614419  | [92][M+1]+            | 152 |
| 1469180  | 1178951  | [1137][M]+            | 114 |
| 130558.6 | 1700477  | [M+Na+Na              | 55  |
| 92535.39 | 126486.4 | [M+H]+ 51:            | 18  |
| 3881919  | 58182465 | [494][M]2+            | 1   |
| 720106.7 | 601391.6 | [M+K+HCO              | 18  |
| 44733.8  | 117598.9 |                       | 186 |
| 98006.37 | 126387.3 |                       | 191 |
| 1320709  | 1856018  |                       | 396 |
| 579246.9 | 20730676 | [119][M+1]+           | 91  |
| 3.88E+09 | 7.5E+09  | [1350][M+1]+          | 1   |
| 1516781  | 1993231  |                       | 136 |
| 5999938  | 5974877  | [M+H-CO]+             | 100 |
| 1071311  | 468940.7 |                       | 175 |
| 300208.9 | 304133   | [278][M+1]2+          | 83  |
| 1119552  | 506666.3 | [260][M]+ [M+K]+ 27:  | 66  |
| 1597061  | 1249681  | [207][M+1]+           | 66  |
| 128728.4 | 70330.48 | [274][M+2]2+          | 118 |
| 2465508  | 3617263  |                       | 400 |
| 613047.4 | 570080.1 | [M+H-CH2]             | 40  |
| 272662   | 190102.9 | [204][M+1]+           | 231 |
| 132455.1 | 352119.1 | [2M+Na]+ :            | 49  |
| 295389.3 | 74560.59 | [1504][M+1]+          | 134 |
| 23067328 | 9896621  |                       | 145 |
| 8205588  | 12078260 | [1027][M]+ [M+H]+ 53: | 128 |
| 4424495  | 954956.7 | [1179][M]+            | 61  |
| 158605.8 | 502643.8 | [M+H]+ 35:            | 103 |
| 467541.2 | 216901.1 |                       | 29  |
| 676409.3 | 764902.9 |                       | 327 |
| 4823171  | 12668982 |                       | 1   |

|          |          |                      |     |
|----------|----------|----------------------|-----|
| 165031.5 | 551844.5 | [1296][M+1]+         | 49  |
| 176951.3 | 124327.3 | [773][M+1]+          | 276 |
| 8747.954 | 421769.1 |                      | 55  |
| 628308.3 | 1452439  | [51][M]2+ [M+H+Na]2+ | 169 |
| 2080917  | 2686641  | [958][M+1]+          | 116 |
| 2526521  | 1140983  | [762][M]+ [M+Na+K]+  | 52  |
| 52151.6  | 119645.2 | [M+K+NaCl]           | 103 |
| 348219.9 | 201269.3 | [M+2H-H2O]           | 83  |
| 17783113 | 84909445 |                      | 1   |
| 250490.9 | 278505.8 | [573][M+1]+          | 101 |
| 169198.7 | 85166.07 |                      | 175 |
| 14536906 | 21049364 |                      | 148 |
| 1142123  | 643283.2 | [236][M+1]+          | 24  |
| 8107368  | 32748356 | [919][M+1]+          | 4   |
| 423006.2 | 1835178  |                      | 90  |
| 277441.8 | 500574.1 | [1119][M+1]2+        | 322 |
| 671365   | 1060045  | [M+Na]+ 6:           | 31  |
| 591674.6 | 699984.7 |                      | 20  |
| 1338426  | 5422292  | [1458][M]2+          | 1   |
| 641164.3 | 581269.9 | [1402][M]+ [M+H]+ 73 | 34  |
| 533484.8 | 1270865  | [1479][M]+           | 49  |
| 105609.8 | 620450.5 | [1375][M+1]+         | 73  |
| 45093764 | 91586774 |                      | 1   |
| 624681   | 552283.5 | [M+Na+HC]            | 29  |
| 185133.5 | 198105.8 |                      | 25  |
| 370670.2 | 1811138  | [M+H+NH3]            | 104 |
| 2830183  | 5864115  |                      | 17  |
| 111221.3 | 234285.7 | [460][M+2]+          | 29  |
| 6202909  | 10516806 |                      | 1   |
| 422626.3 | 2512268  |                      | 81  |
| 1179167  | 6696482  | [502][M+1]2+         | 1   |
| 523044   | 267785.1 | [M+H-COCl]           | 159 |
| 562363.3 | 464669.2 |                      | 445 |
| 1064206  | 2608033  |                      | 26  |
| 245246.7 | 133694.5 | [M+Na]+ 4:           | 157 |
| 146545.9 | 2122285  | [M+K]+ 61:           | 29  |
| 348971   | 354451.7 |                      | 108 |
| 243157.7 | 173823.3 | [1402][M+1]+         | 34  |
| 1203804  | 396770.8 |                      | 61  |
| 1026955  | 29006.24 | [2M+Na]+ :           | 23  |
| 3409472  | 8983241  | [504][M+2]2+         | 1   |
| 467458.3 | 320726.9 | [M+H-H2O]            | 57  |
| 10483360 | 38330666 |                      | 4   |
| 248868.1 | 561542   | [M+H-C4H8]           | 178 |
| 869360.5 | 624557.8 | [327][M+1]+          | 118 |
| 7097477  | 12141939 | [65][M]+             | 204 |
| 2889376  | 1861834  |                      | 29  |



|          |          |                      |     |
|----------|----------|----------------------|-----|
| 15845657 | 27259960 | [130][M]+ [M+H]+ 260 | 116 |
| 268484.4 | 888439.8 | [1349][M+2]+         | 49  |
| 284706.6 | 319412.7 | [210][M+2]+          | 18  |
| 930740.6 | 2095429  | [168][M]+            | 245 |
| 4232486  | 1768728  | [170][M]+ [M+H-CH3]  | 72  |
| 2564006  | 6388091  | [733][M]+            | 71  |
| 2042616  | 2246545  | [905][M+1]+          | 330 |
| 82016.88 | 635306   | [M+K+CF3C            | 104 |
| 963453.8 | 2185535  | [100][M+1]+          | 290 |
| 1264727  | 22505024 |                      | 1   |
| 367513.4 | 622926.2 |                      | 31  |
| 449234.1 | 494172.2 |                      | 29  |
| 1879698  | 5723743  | [M+2K]2+ 4           | 169 |
| 9397204  | 31401215 | [M+2K-H]+            | 8   |
| 283265.6 | 216332.7 |                      | 427 |
| 780332.7 | 369704.5 | [1191][M+1]+         | 127 |
| 145598.4 | 298749   |                      | 46  |
| 1233590  | 1444593  | [281][M+1]+          | 182 |
| 3200338  | 3142090  | [M+K]+ 260           | 87  |
| 593811.5 | 385009.9 | [880][M+1]+          | 190 |
| 282627.9 | 1290054  | [M+Na]+ 20           | 133 |
| 583606.6 | 674391.1 |                      | 44  |
| 2713841  | 1286842  | [1228][M]+ [M+2K-H]+ | 118 |
| 357465.6 | 334934.2 |                      | 171 |
| 64930.59 | 109198.6 | [437][M+1]+          | 324 |
| 609421.9 | 1454014  |                      | 2   |
| 524035   | 194036.3 |                      | 16  |
| 402987.1 | 356778.7 | [457][M+1]+          | 230 |
| 336238   | 47712.28 | [M+H+NH3             | 309 |
| 234660.8 | 1311217  | [1189][M+4]+         | 29  |
| 706185.7 | 405172   | [M+2Na-H]            | 100 |
| 403408.2 | 122900.4 |                      | 95  |
| 323217.6 | 2108435  |                      | 91  |
| 254054.9 | 1927617  |                      | 136 |
| 366733.7 | 466968.1 | [577][M+1]+          | 20  |
| 4865476  | 2877824  |                      | 305 |
| 363348.4 | 1423370  | [1302][M+1]+         | 56  |
| 687948.2 | 1102458  | [752][M+1]+          | 169 |
| 897968.4 | 852599.5 |                      | 277 |
| 566033.1 | 207196   | [1225][M+2]+         | 47  |
| 49703.47 | 244690.7 | [2M+Na+K]            | 110 |
| 2750952  | 496482.4 | [M+Na]+ 70           | 18  |
| 435649.9 | 9027454  |                      | 104 |
| 5584239  | 15718941 |                      | 70  |
| 218841.6 | 381075.9 |                      | 147 |
| 547532.3 | 289199.3 | [1369][M]+           | 321 |
| 4727987  | 46873255 | [1197][M]+           | 11  |

|          |          |                     |     |
|----------|----------|---------------------|-----|
| 114872.8 | 260364.4 | [1223][M+1]+        | 10  |
| 104398   | 1324122  | [M+Na]+ 5:          | 55  |
| 841945.4 | 771390.2 |                     | 112 |
| 332207.9 | 156135.6 | [578][M+1]2+        | 104 |
| 277142.2 | 313597.3 | [M+H]+ 33:          | 151 |
| 2554756  | 2254960  | [128][M+1]+         | 20  |
| 6888543  | 44422399 | [285][M]+ [M+K+HCO  | 172 |
| 1304959  | 1017697  |                     | 139 |
| 1054065  | 541486.6 | [874][M]+ [M+H-CH2] | 23  |
| 9223588  | 45539691 |                     | 11  |
| 237167.4 | 2586145  | [3M+H]+ 1:          | 104 |
| 3040778  | 4613594  |                     | 290 |
| 2444804  | 4291792  |                     | 55  |
| 1249704  | 599521   | [1283][M]+          | 52  |
| 653261.7 | 1.75E+09 | [475][M+1]+         | 1   |
| 3975044  | 2614749  | [M+2Na-H]           | 284 |
| 210801.9 | 2822319  | [1096][M]+          | 104 |
| 2327688  | 2555451  |                     | 248 |
| 142483.8 | 218129.5 | [1391][M+1]+        | 314 |
| 14912142 | 8636429  | [378][M+1]2+        | 1   |
| 1093792  | 965512.8 | [M+H+HCC            | 215 |
| 698539.8 | 11973681 |                     | 1   |
| 51287782 | 2.43E+08 |                     | 1   |
| 337884.1 | 496852.7 | [218][M+2]2+        | 138 |
| 33866.23 | 855766.6 | [M+H-CH3]           | 79  |
| 458174.8 | 453457.7 |                     | 62  |
| 1904199  | 1528440  | [526][M+1]+         | 70  |
| 19455554 | 19406225 | [1023][M]+ [M+K+NH3 | 263 |
| 2.83E+08 | 898625.7 | [M+K]+ 26:          | 26  |
| 930050.3 | 583728.4 |                     | 72  |
| 1221705  | 4268045  |                     | 61  |
| 177397   | 70530.22 |                     | 221 |
| 2082228  | 2608941  | [1567][M+1]2+       | 11  |
| 3240313  | 49076731 |                     | 58  |
| 513495   | 923131.5 |                     | 235 |
| 6248038  | 21554398 | [472][M]2+          | 1   |
| 315126.1 | 404001.3 | [497][M+1]+         | 103 |
| 110025.5 | 240525.7 |                     | 217 |
| 1582235  | 2362716  |                     | 428 |
| 388097.5 | 296932.1 |                     | 244 |
| 192766.8 | 52140.9  | [386][M+1]2+        | 46  |
| 2018785  | 1239301  | [1408][M+2]+        | 29  |
| 280014.8 | 260012.9 | [M+H+NH3            | 49  |
| 233378   | 256592.7 |                     | 178 |
| 474783.1 | 343745.4 | [987][M+1]+         | 293 |
| 4435381  | 12689087 | [1570][M+3]2+       | 11  |
| 173488.1 | 106664.9 | [M+Na+Na            | 108 |

|          |          |                      |     |
|----------|----------|----------------------|-----|
| 6439085  | 5845719  | [1107][M]+           | 107 |
| 2.09E+08 | 1.37E+08 | [728][M]+            | 35  |
| 336807.9 | 378549   | [1441][M]+           | 34  |
| 92886.45 | 343487.6 |                      | 169 |
| 648357   | 603920.1 | [1536][M+1]+         | 301 |
| 57314.56 | 785514.3 | [M+H-CO2]            | 199 |
| 487442.2 | 675266.1 |                      | 342 |
| 29192.68 | 326406.3 | [406][M+1]+          | 186 |
| 326046.7 | 325318.5 |                      | 112 |
| 176790.8 | 241490.4 |                      | 48  |
| 1104544  | 1825160  |                      | 26  |
| 31639.68 | 214033.3 |                      | 194 |
| 43135.85 | 560316.6 | [278][M]2+           | 83  |
| 641483.7 | 508132.6 |                      | 264 |
| 612845.5 | 577554.1 | [M+H]+ 25:           | 79  |
| 2390610  | 7378478  |                      | 1   |
| 472193.7 | 1531232  |                      | 49  |
| 25207.23 | 917332.1 |                      | 124 |
| 2075483  | 231166.8 |                      | 278 |
| 215750.2 | 79392.47 |                      | 200 |
| 84601.89 | 1665619  |                      | 171 |
| 1711029  | 7113775  |                      | 264 |
| 412829.8 | 597064   |                      | 93  |
| 1501937  | 2880805  | [M+H-COCl            | 4   |
| 42428171 | 74994541 |                      | 131 |
| 5631966  | 35869145 | [28][M]+             | 133 |
| 470126.9 | 492745.5 | [3M+H+Na             | 103 |
| 18525.35 | 391613.1 |                      | 290 |
| 1789553  | 1005152  |                      | 75  |
| 8280756  | 9410173  | [M+K]+ 376           | 218 |
| 363432.6 | 152566.7 | [1185][M+1]+         | 111 |
| 2675855  | 733337.3 |                      | 1   |
| 36323.58 | 809415.6 |                      | 196 |
| 284231.2 | 443025   |                      | 104 |
| 383463.1 | 447625.7 | [M+K]+ 267           | 309 |
| 63806.47 | 511499.1 |                      | 103 |
| 95713.13 | 1756816  | [M+Na+CF3            | 104 |
| 185772.2 | 197278.3 | [M+H]+ 436           | 159 |
| 673182.8 | 12936778 | [1197][M+1]+         | 11  |
| 867489   | 1046026  |                      | 245 |
| 17526937 | 12021809 | [996][M]+ [M+K+NH3   | 261 |
| 530660.8 | 3834615  |                      | 198 |
| 207075.1 | 5161455  | [765][M]+ [M+K]+ 414 | 103 |
| 324124.6 | 848296.7 |                      | 435 |
| 1002723  | 15369293 |                      | 1   |
| 18689304 | 18441750 | [128][M]+            | 20  |
| 333878.7 | 428588.3 | [411][M+1]2+         | 116 |

|          |          |                      |     |
|----------|----------|----------------------|-----|
| 820510.2 | 5287674  |                      | 171 |
| 223974.7 | 4134029  | [1237][M+4]+         | 29  |
| 11420655 | 10257220 | [1295][M+1]+         | 205 |
| 724755.6 | 381904.5 | [1408][M+4]+         | 29  |
| 15173177 | 16645760 |                      | 134 |
| 2089016  | 2949165  | [M+Na]+ 4!           | 8   |
| 3924710  | 9189250  |                      | 1   |
| 3505632  | 3788105  | [330][M+1]+          | 124 |
| 1035401  | 1209085  |                      | 338 |
| 1464641  | 931304.8 | [1539][M+1]+         | 100 |
| 13619090 | 17239506 | [144][M]+ [M+H+NH3   | 178 |
| 3467736  | 31825093 | [153][M]+ [M+Na+Na   | 55  |
| 302025.9 | 282446.6 |                      | 342 |
| 19411.05 | 1338472  |                      | 124 |
| 887897.2 | 3783221  |                      | 12  |
| 37657271 | 1.75E+08 | [919][M]+ [M+Na+HC   | 4   |
| 6.5E+08  | 3.56E+08 | [591][M]+ [M+H]+ 39! | 23  |
| 853315.8 | 294866.7 | [1569][M+1]+         | 29  |
| 1109991  | 3484761  |                      | 390 |
| 676261.3 | 1280073  | [313][M+1]2+         | 60  |
| 2050503  | 7371389  | [219][M]+ [M+Na]+ 2' | 49  |
| 615659.2 | 3552611  |                      | 133 |
| 1542254  | 2368731  |                      | 28  |
| 6991013  | 9177827  | [1568][M+2]+         | 11  |
| 7965000  | 6009744  | [860][M]+            | 236 |
| 18873032 | 18884718 | [498][M]+            | 20  |
| 233547.2 | 1172685  |                      | 103 |
| 46431.72 | 383361.7 |                      | 240 |
| 4148610  | 43347190 | [81][M]+ [M+Na]+ 2!  | 199 |
| 142752.6 | 32072.28 |                      | 114 |
| 15019.03 | 283086.1 |                      | 103 |
| 1157154  | 1891017  | [871][M]+            | 10  |
| 82034.33 | 411096.5 |                      | 55  |
| 107965.9 | 343027.4 |                      | 44  |
| 5714214  | 5241836  | [36][M]+             | 70  |
| 109890.1 | 233589.5 |                      | 160 |
| 454581.9 | 272130.4 | [M+Na]+ 2!           | 304 |
| 100472.5 | 266791.3 | [1455][M+2]+         | 34  |
| 244741.6 | 2457037  | [165][M+1]+          | 199 |
| 1180566  | 1936968  | [271][M]+            | 124 |
| 5511247  | 15518734 | [1570][M]2 [2M+H+Na  | 11  |
| 14904232 | 4073544  | [926][M]+            | 2   |
| 402075   | 60954.56 |                      | 270 |
| 1591208  | 2171327  |                      | 284 |
| 315784.5 | 302122.5 | [M+2H-HC(            | 118 |
| 548187.8 | 930365.6 |                      | 302 |
| 1946147  | 2974049  | [1447][M]+           | 26  |

|          |          |                     |     |
|----------|----------|---------------------|-----|
| 3466380  | 7680153  |                     | 1   |
| 824205.3 | 786022.5 | [1394][M+1]+        | 313 |
| 389963   | 2947366  |                     | 172 |
| 1504446  | 1151348  | [689][M]2+          | 175 |
| 1710651  | 2726134  | [1338][M+1]+        | 60  |
| 752518.5 | 544487.5 | [1464][M+2]+        | 278 |
| 55005046 | 15905777 |                     | 53  |
| 9554136  | 31327998 |                     | 70  |
| 22853120 | 34440646 |                     | 321 |
| 61229523 | 39984193 | [728][M+1]+         | 35  |
| 244251   | 2265766  | [1129][M]+          | 29  |
| 223947.3 | 650528.2 |                     | 144 |
| 58012.03 | 158544.8 |                     | 176 |
| 1276571  | 841411.8 | [1145][M]+          | 338 |
| 346139.7 | 275729.1 | [531][M+1]+         | 71  |
| 7119204  | 7392804  | [379][M+1]+         | 244 |
| 59852.28 | 139806.6 | [M+K+NH3            | 293 |
| 1514619  | 3634763  | [537][M]2+          | 70  |
| 196091.8 | 448480.2 |                     | 289 |
| 21717113 | 62033207 | [646][M]+ [M+H]+ 41 | 104 |
| 1799070  | 1546159  | [1519][M+1]+        | 200 |
| 242471.8 | 207284.6 | [1583][M+2]+        | 34  |
| 9365780  | 11382797 | [21][M+1]+          | 17  |
| 2807265  | 3411580  | [708][M+2]+         | 2   |
| 519578.7 | 27058997 | [548][M]+ [M+K]+ 34 | 199 |
| 598968.9 | 702110.6 | [757][M+1]+         | 370 |
| 186747.2 | 192404.3 |                     | 336 |
| 140322.8 | 0        |                     | 46  |
| 624286   | 907224.4 |                     | 397 |
| 1173235  | 953576.5 | [1005][M+1]+        | 16  |
| 178851.8 | 549482.3 |                     | 217 |
| 7354105  | 33660593 |                     | 7   |
| 291963.7 | 236315.6 | [1530][M+5]+        | 100 |
| 98136.36 | 130496.7 | [M+H-H20]           | 245 |
| 16672.34 | 534269.5 |                     | 55  |
| 7504313  | 9671524  | [96][M]+ [M+Na+HC   | 103 |
| 312245.9 | 228395.3 | [1250][M+1]+        | 338 |
| 780804.2 | 839263.2 | [313][M+2]2+        | 60  |
| 115849.7 | 227631.1 | [1080][M+2]+        | 217 |
| 647221.5 | 1606305  |                     | 290 |
| 1656400  | 470608.9 |                     | 353 |
| 974775.3 | 4055529  |                     | 182 |
| 1354374  | 1222666  | [1107][M+1]+        | 107 |
| 627818.5 | 824145.7 | [M+K]+ 28           | 116 |
| 75795.77 | 430969   | [3M+3K-H]           | 138 |
| 309709.6 | 236911.1 |                     | 174 |
| 2470465  | 6451989  | [816][M]+           | 11  |

|          |          |                                               |     |
|----------|----------|-----------------------------------------------|-----|
| 371723   | 321961.9 | [M+H+Na] <sup>2+</sup>                        | 219 |
| 1814324  | 1282867  |                                               | 8   |
| 231700.7 | 1757824  |                                               | 104 |
| 217309.1 | 311463.8 | [254][M+1] <sup>+</sup>                       | 112 |
| 3994557  | 5785187  | [387][M] <sup>+</sup> [M+H+NH <sub>3</sub>    | 31  |
| 340634.2 | 285621.1 |                                               | 47  |
| 210516.8 | 450520.9 | [M+Na] <sup>+</sup> 3!                        | 119 |
| 17604.01 | 472028.8 |                                               | 55  |
| 35659    | 164279.8 | [M+H+HCC                                      | 178 |
| 1775209  | 1105546  | [1154][M] <sup>2+</sup> [2M+2Na+I             | 29  |
| 140611.9 | 37762.75 |                                               | 337 |
| 1827759  | 1645641  | [M+H+Na] <sup>2+</sup>                        | 100 |
| 1313336  | 1553184  | [214][M] <sup>+</sup>                         | 199 |
| 311855.4 | 495768.7 | [M+2Na-H]                                     | 133 |
| 2091862  | 18863882 | [3M+2K] <sup>2+</sup>                         | 55  |
| 62678.39 | 401443.3 |                                               | 239 |
| 548261.4 | 603311.3 |                                               | 349 |
| 863624.4 | 8.4E+08  |                                               | 1   |
| 5185818  | 3944627  | [1005][M] <sup>+</sup>                        | 16  |
| 1171558  | 1175962  | [619][M] <sup>+</sup>                         | 449 |
| 870583.3 | 1286512  |                                               | 8   |
| 2962140  | 7170181  |                                               | 70  |
| 451543.7 | 526106.6 |                                               | 66  |
| 3076248  | 4753251  |                                               | 63  |
| 510167.1 | 381407.2 | [1047][M+1] <sup>+</sup>                      | 160 |
| 195654.4 | 6091603  |                                               | 1   |
| 960718   | 794362.4 | [1583][M] <sup>+</sup>                        | 34  |
| 419333.5 | 372731.7 |                                               | 151 |
| 296274.9 | 742004.8 | [1430][M+2] <sup>+</sup>                      | 29  |
| 6193595  | 32073074 | [746][M] <sup>2+</sup>                        | 11  |
| 6655157  | 19071515 | [92][M] <sup>+</sup>                          | 152 |
| 201977.3 | 152186.1 | [1037][M+1] <sup>+</sup>                      | 372 |
| 430819.9 | 154923.5 | [747][M+2] <sup>+</sup>                       | 172 |
| 195189.9 | 319287.6 |                                               | 181 |
| 138901.2 | 273557.3 |                                               | 465 |
| 174941   | 644479.6 | [M+H] <sup>+</sup> 39!                        | 55  |
| 2657392  | 29980231 | [165][M] <sup>+</sup>                         | 199 |
| 1153658  | 116290.1 | [1404][M] <sup>+</sup> [M+Na] <sup>+</sup> 7! | 18  |
| 474720.3 | 337088.8 | [M+H] <sup>+</sup> 35!                        | 221 |
| 75183.68 | 41932.05 |                                               | 29  |
| 508169.5 | 431499.7 | [M+H-H <sub>2</sub> O]                        | 143 |
| 145397.2 | 1290592  | [M+H-COCl                                     | 55  |
| 197344.8 | 388371.6 | [241][M+1] <sup>+</sup>                       | 27  |
| 13784.4  | 965769.6 |                                               | 96  |
| 724700.4 | 620128.4 | [1583][M+1] <sup>+</sup>                      | 34  |
| 1718481  | 766976.8 | [M+H+K] <sup>2+</sup>                         | 18  |
| 8006000  | 9648268  | [281][M] <sup>+</sup>                         | 182 |

|          |          |                      |     |
|----------|----------|----------------------|-----|
| 539615.3 | 45102.16 | [1561][M+1]+         | 29  |
| 2854489  | 1735195  | [1423][M+1]+         | 143 |
| 2359671  | 1809167  | [1494][M]+           | 416 |
| 582161.2 | 446840.4 |                      | 405 |
| 441081.9 | 499758   |                      | 52  |
| 1141068  | 572206.8 | [853][M+4]+          | 2   |
| 413931.4 | 410274.7 | [1401][M+2]+         | 34  |
| 18360772 | 37263247 | [702][M]+ [M+H]+ 43: | 26  |
| 169319.7 | 245353.1 | [M+H-COCl            | 119 |
| 209896.4 | 277222.4 |                      | 336 |
| 5508101  | 13683411 |                      | 11  |
| 1.31E+08 | 71586059 | [591][M+1]+          | 23  |
| 183021.1 | 2120633  | [M+K]+ 62:           | 47  |
| 1458187  | 958678.4 | [M+H]+ 51:           | 11  |
| 147843.9 | 683214.2 | [M+K+NH3             | 11  |
| 7867411  | 11379060 | [958][M]+            | 116 |
| 122287.1 | 284614.1 |                      | 381 |
| 398358.8 | 232393.2 | [2M+H]+ 5:           | 29  |
| 969351.4 | 1177762  | [M+H+HCC             | 8   |
| 2131974  | 5343577  | [141][M+2]2+         | 11  |
| 1366178  | 2095220  | [241][M]+            | 27  |
| 451526   | 1941268  |                      | 52  |
| 72230.95 | 55554.45 |                      | 37  |
| 579217.5 | 1433411  |                      | 323 |
| 778891.5 | 1859574  | [1078][M]+           | 169 |
| 113255.2 | 117128.6 |                      | 207 |
| 20279340 | 23713683 | [330][M]+            | 124 |
| 426692.3 | 234255.4 |                      | 108 |
| 1030738  | 933145.3 | [1386][M]+ [M+H-CH2] | 34  |
| 266953   | 215198.8 |                      | 261 |
| 88270.37 | 87433.61 | [M+3H]3+ :           | 282 |
| 543514.4 | 848967.8 |                      | 147 |
| 112769.7 | 206932.9 |                      | 116 |
| 6856476  | 31401125 | [1362][M+3]+         | 1   |
| 514909.2 | 486973.5 | [223][M+2]+          | 217 |
| 91979412 | 91653188 | [287][M]+ [M+H-H2O]  | 83  |
| 504066.4 | 652472.3 | [M+H]+ 43:           | 217 |
| 123558.3 | 639628.5 | [1346][M]+           | 50  |
| 1826145  | 363650.5 |                      | 438 |
| 593669.4 | 862559.7 |                      | 10  |
| 707010.5 | 1956315  | [66][M+1]+           | 190 |
| 86186.3  | 627492.3 | [M+K]+ 24:           | 17  |
| 623771.1 | 1826430  | [945][M+2]+          | 49  |
| 278146.2 | 2405702  |                      | 42  |
| 284348.9 | 504699.9 | [M+2K]2+ :           | 116 |
| 17460084 | 3320109  |                      | 48  |
| 12503133 | 25440229 | [697][M]+            | 235 |

|          |          |                      |     |
|----------|----------|----------------------|-----|
| 135226.7 | 965269.6 | [M+2K-H]+            | 199 |
| 1406685  | 1041071  | [789][M+1]+          | 52  |
| 302831.1 | 698358.5 |                      | 348 |
| 1318342  | 1310591  |                      | 178 |
| 7.07E+08 | 4878374  | [602][M+1]+          | 4   |
| 13115922 | 40664860 | [699][M]+ [M+H+NH3   | 104 |
| 1269288  | 1852471  | [573][M]+ [M+H+NH3   | 101 |
| 46988.38 | 2427365  |                      | 124 |
| 2363819  | 2258742  | [M+H]+ 24:           | 171 |
| 326862.5 | 93436.28 |                      | 206 |
| 1134649  | 2391371  | [394][M]+ [M+K]+ 30: | 155 |
| 798736.4 | 624460.3 |                      | 54  |
| 591842.9 | 7521881  |                      | 1   |
| 870165   | 4984062  |                      | 306 |
| 14417762 | 12109084 | [207][M]+ [M+Na]+ 2: | 66  |
| 968662.5 | 507709.8 |                      | 23  |
| 3341409  | 3913687  | [768][M+1]+          | 71  |
| 342419.3 | 438382.3 |                      | 359 |
| 506393.7 | 424087.2 | [1522][M+1]+         | 214 |
| 136800.9 | 184550   |                      | 232 |
| 1325238  | 764173.2 | [1569][M]+           | 29  |
| 75788.68 | 86173.7  | [1099][M+1]+         | 29  |
| 622111.2 | 245076.6 | [1407][M+1]+         | 29  |
| 132198.2 | 342133.7 |                      | 174 |
| 160010.6 | 787864.7 | [2M+Na]+ :           | 49  |
| 170015.7 | 2690758  | [M+H]+ 42:           | 55  |
| 249430.9 | 3197175  |                      | 73  |
| 501130.3 | 1549209  | [779][M]+            | 235 |
| 625506.2 | 536286.9 | [M+H-CO2]            | 55  |
| 457761.3 | 618689.7 | [1498][M+2]+         | 175 |
| 851004.4 | 1344774  | [1447][M+1]+         | 26  |
| 4899192  | 4370846  | [963][M]+ [M+Na]+ 4: | 116 |
| 108049.8 | 573339   | [424][M+2]+          | 178 |
| 136843.9 | 1345263  | [M+K+NaCl            | 29  |
| 18820671 | 19882900 | [M+H]+ 28:           | 213 |
| 6529114  | 969436.6 | [1014][M+1]+         | 249 |
| 14502021 | 15830138 | [109][M]+ [M+H]+ 25: | 178 |
| 126112.1 | 359389.4 | [M+K]+ 31:           | 60  |
| 4319772  | 22307703 |                      | 10  |
| 320734.8 | 973392.4 | [50][M+1]+           | 209 |
| 245871.3 | 1540273  |                      | 2   |
| 14547693 | 15873560 | [572][M+2]+          | 20  |
| 379000.5 | 148890.4 | [M+H-C4H8            | 15  |
| 1391016  | 1056863  | [1072][M]+           | 176 |
| 738107.1 | 1535353  | [1076][M]+ [M+2K-H]+ | 137 |
| 11068158 | 9209252  | [1113][M]+           | 176 |
| 375402.4 | 252357.4 |                      | 65  |



|          |          |                      |     |
|----------|----------|----------------------|-----|
| 456183.5 | 1148731  | [429][M]2+           | 288 |
| 187168.1 | 318353.8 | [M+H+CF3O]           | 217 |
| 143534.4 | 382026.1 | [M+K+NaCl]           | 78  |
| 137090.1 | 327577.5 | [M+H-COCl]           | 276 |
| 395496.3 | 368745.4 | [M+H-NH3]            | 134 |
| 49753.81 | 873517   | [548][M+2]+          | 199 |
| 871640.7 | 1047180  |                      | 326 |
| 312566.1 | 1956769  |                      | 419 |
| 10013073 | 15892245 |                      | 1   |
| 477965.2 | 554834.4 | [169][M+1]+          | 107 |
| 1018718  | 328569.9 |                      | 217 |
| 3045669  | 37569073 |                      | 1   |
| 995019.9 | 555162.9 | [3M+Na+K]            | 16  |
| 12082652 | 20947710 | [268][M]+            | 26  |
| 504334   | 677659   |                      | 70  |
| 4413810  | 2336574  |                      | 104 |
| 109235.1 | 65512.26 | [M+H-CH2]            | 18  |
| 514034.5 | 1946982  | [M+Na]+ 4            | 25  |
| 2594527  | 9603234  | [699][M+1]+          | 104 |
| 617302.8 | 2376319  | [3M+Na+K]            | 49  |
| 250286.8 | 255064.9 |                      | 19  |
| 35940.91 | 1471034  | [M+Na]+ 4            | 172 |
| 841037.1 | 651641.1 |                      | 188 |
| 830929.7 | 1742795  | [593][M+1]+          | 4   |
| 282546.8 | 337067.9 |                      | 70  |
| 2144298  | 2287900  |                      | 116 |
| 154426.2 | 554882.9 |                      | 410 |
| 2944607  | 30293114 |                      | 1   |
| 841686.3 | 1046479  | [210][M+1]+          | 18  |
| 3764544  | 2954124  | [1024][M+1]+         | 242 |
| 305356.2 | 91701.28 | [M+H]+ 510           | 23  |
| 1262450  | 765703.1 |                      | 318 |
| 355056.8 | 1205469  |                      | 117 |
| 218777.7 | 100193.7 | [3M+Na+K]            | 16  |
| 186488.6 | 214262.5 | [145][M+1]+          | 105 |
| 1192881  | 10019504 |                      | 166 |
| 46194.11 | 68973.82 | [1278][M+4]+         | 34  |
| 13322791 | 66057645 |                      | 10  |
| 42385241 | 52086982 | [885][M]+            | 2   |
| 497272.4 | 258156.9 |                      | 266 |
| 28653087 | 18117252 | [1116][M]+           | 216 |
| 1.3E+08  | 1.4E+08  | [572][M+1]+          | 20  |
| 28477635 | 1.61E+08 | [1029][M]+ [M+K]+ 50 | 11  |
| 83102.07 | 441102.4 |                      | 133 |
| 202297.9 | 129078.9 | [1129][M+1]+         | 29  |
| 5715406  | 13786199 | [832][M+1]+          | 26  |
| 94722.16 | 214250.9 |                      | 398 |

|          |          |                                               |     |
|----------|----------|-----------------------------------------------|-----|
| 44430.11 | 1751187  |                                               | 103 |
| 927545.4 | 406502.4 | [M+Na] <sup>+</sup> 2!                        | 288 |
| 109091.3 | 179786.7 |                                               | 11  |
| 213597.6 | 681471   |                                               | 26  |
| 2474686  | 2509494  | [944][M] <sup>2+</sup>                        | 13  |
| 148288.4 | 691824.9 |                                               | 204 |
| 265224.2 | 177284.3 |                                               | 158 |
| 2233035  | 4275379  | [175][M] <sup>+</sup>                         | 396 |
| 863874   | 483890.2 | [M+2K-H] <sup>+</sup>                         | 116 |
| 86517.03 | 97037.28 | [1401][M+3] <sup>+</sup>                      | 34  |
| 365372.1 | 808356.6 | [M+2H-H2O]                                    | 212 |
| 6374970  | 18868901 | [1570][M+2] <sup>2+</sup>                     | 11  |
| 3828494  | 2921345  | [996][M+1] <sup>+</sup>                       | 261 |
| 462911.2 | 647230.6 | [M+H] <sup>+</sup> 52!                        | 88  |
| 142807.9 | 334290.6 | [601][M+1] <sup>+</sup>                       | 162 |
| 1.26E+08 | 2.78E+08 | [1374][M] <sup>+</sup>                        | 1   |
| 44451.75 | 44941.57 |                                               | 46  |
| 18077689 | 17926398 | [287][M+1] <sup>+</sup>                       | 83  |
| 209447.9 | 208095.8 |                                               | 55  |
| 56243.54 | 436482.3 | [365][M+1] <sup>+</sup>                       | 91  |
| 3392814  | 12094935 | [1166][M+2] <sup>+</sup>                      | 7   |
| 209650.5 | 113104.7 |                                               | 354 |
| 131122.9 | 149702.3 |                                               | 362 |
| 1463700  | 1498657  | [1409][M+1] <sup>+</sup>                      | 104 |
| 2912786  | 3213297  |                                               | 290 |
| 1964516  | 2623424  |                                               | 326 |
| 39374.03 | 112071.2 |                                               | 110 |
| 876884.3 | 354067.9 | [827][M] <sup>+</sup> [M+Na] <sup>+</sup> 4!  | 172 |
| 502954.8 | 58813.31 | [M+K+HCO]                                     | 25  |
| 2511048  | 3952318  |                                               | 132 |
| 219561.9 | 105245   |                                               | 22  |
| 2117568  | 772404.7 | [259][M+1] <sup>+</sup>                       | 61  |
| 462565.8 | 737877.5 | [1221][M+1] <sup>+</sup>                      | 10  |
| 2121326  | 3324311  | [258][M] <sup>2+</sup> [M+2H] <sup>2+</sup> 1 | 73  |
| 98003.16 | 253944.9 |                                               | 39  |
| 992971.3 | 759683.9 |                                               | 219 |
| 1393011  | 1691541  |                                               | 397 |
| 1763382  | 623115.9 | [355][M] <sup>+</sup> [M+Na] <sup>+</sup> 3!  | 86  |
| 1269422  | 22217907 | [1458][M+1] <sup>2+</sup>                     | 1   |
| 37184.72 | 114880.2 |                                               | 371 |
| 247482.1 | 404536.3 | [M+H] <sup>+</sup> 85!                        | 101 |
| 233192   | 3792536  |                                               | 55  |
| 104913.2 | 230884.4 | [425][M+1] <sup>2+</sup>                      | 164 |
| 7274710  | 4584219  | [1467][M] <sup>+</sup>                        | 343 |
| 87200.32 | 2119583  | [3M+2Na] <sup>2</sup>                         | 244 |
| 297993.7 | 1570681  | [952][M+1] <sup>+</sup>                       | 69  |
| 3949537  | 3419979  | [1519][M] <sup>+</sup>                        | 200 |

|          |          |                                               |     |
|----------|----------|-----------------------------------------------|-----|
| 171815.4 | 205427.7 | [1067][M+2] <sup>+</sup>                      | 116 |
| 1245108  | 881108.4 | [M+Na] <sup>+</sup> 4:                        | 159 |
| 2267098  | 2498772  | [1498][M+1] <sup>+</sup>                      | 175 |
| 343472.3 | 203485.9 | [1386][M+1] <sup>+</sup>                      | 34  |
| 443676.9 | 375432.6 | [452][M+1] <sup>+</sup>                       | 78  |
| 685337   | 676248.6 | [M+Na] <sup>+</sup> 2:                        | 104 |
| 4680968  | 14827199 | [646][M+1] <sup>+</sup>                       | 104 |
| 2798283  | 4497441  | [384][M+1] <sup>+</sup>                       | 29  |
| 602956.7 | 374693.5 | [3M+2Na] <sup>2</sup>                         | 217 |
| 5.07E+08 | 5.5E+08  | [572][M] <sup>+</sup>                         | 20  |
| 1065377  | 1013759  |                                               | 388 |
| 17494140 | 99994729 | [1166][M+1] <sup>2+</sup>                     | 7   |
| 3741952  | 3528006  | [498][M+1] <sup>+</sup>                       | 20  |
| 785835.5 | 400792.5 |                                               | 146 |
| 30585254 | 13831745 |                                               | 1   |
| 2735300  | 2211669  | [344][M] <sup>+</sup>                         | 288 |
| 133154.4 | 182092.2 | [M+2H-H2O]                                    | 218 |
| 2821759  | 3234887  | [621][M+2] <sup>+</sup>                       | 9   |
| 2975300  | 1926130  |                                               | 85  |
| 900708.4 | 555969.6 | [1561][M] <sup>+</sup>                        | 29  |
| 562325.6 | 2137207  | [M+Na] <sup>+</sup> 2:                        | 104 |
| 757620.8 | 3584485  |                                               | 328 |
| 705829.7 | 5182720  |                                               | 91  |
| 3266208  | 4523245  | [1095][M+1] <sup>+</sup>                      | 160 |
| 524482.9 | 535639.6 |                                               | 55  |
| 1123840  | 4719480  |                                               | 210 |
| 1198467  | 1675124  | [973][M] <sup>+</sup>                         | 164 |
| 13053119 | 16200991 | [248][M] <sup>+</sup>                         | 292 |
| 293555.5 | 269127.8 | [1253][M+2] <sup>+</sup>                      | 73  |
| 1104284  | 2502510  |                                               | 53  |
| 21378.73 | 902657.6 |                                               | 97  |
| 1071935  | 371000.6 | [M+K] <sup>+</sup> 39:                        | 23  |
| 123505.7 | 1002839  |                                               | 231 |
| 70994.61 | 1628871  | [M+K] <sup>+</sup> 69:                        | 29  |
| 2509317  | 1055112  | [1564][M] <sup>+</sup> [2M+2Na] <sup>+</sup>  | 29  |
| 969823.7 | 1229700  | [1534][M] <sup>+</sup> [M+H] <sup>+</sup> 92: | 23  |
| 910271.7 | 1093651  | [456][M+1] <sup>2+</sup>                      | 2   |
| 351775.3 | 760456.9 | [M+K] <sup>+</sup> 14:                        | 104 |
| 745312.2 | 4045462  | [924][M+3] <sup>+</sup>                       | 11  |
| 0        | 127584.2 |                                               | 88  |
| 137686.6 | 416589   |                                               | 78  |
| 411018.8 | 8709941  |                                               | 1   |
| 1479720  | 5635775  |                                               | 1   |
| 531073.1 | 4557618  | [365][M] <sup>+</sup>                         | 91  |
| 3014258  | 4983471  | [570][M] <sup>+</sup>                         | 110 |
| 106985.4 | 1504746  |                                               | 199 |
| 2705539  | 16031337 | [M+H] <sup>+</sup> 25:                        | 133 |

|          |          |              |            |     |
|----------|----------|--------------|------------|-----|
| 1.22E+08 | 1.03E+08 | [343][M]+    | [M+H+NH3   | 79  |
| 24722.51 | 2221378  |              |            | 55  |
| 275871.3 | 251869.2 |              | [M+K]+ 31: | 83  |
| 578009.8 | 332637   |              | [M+3K-H]2  | 29  |
| 1308490  | 611491.8 |              |            | 289 |
| 74985.27 | 128688.9 |              | [M+H]+ 56: | 173 |
| 1101789  | 2039367  |              |            | 170 |
| 80535.95 | 214706.5 |              | [M+K]+ 45: | 55  |
| 385061.8 | 773053.8 |              |            | 353 |
| 144328.5 | 177448.4 |              | [M+Na+HC   | 49  |
| 691471.1 | 3188601  |              | [2M+H+Na   | 49  |
| 123068.2 | 112735.2 |              |            | 312 |
| 138630.1 | 307195.9 |              |            | 442 |
| 11160687 | 7856942  | [1502][M]+   |            | 85  |
| 147607.1 | 36257.14 |              |            | 48  |
| 1645007  | 1397441  |              | [3M+H+K]2  | 100 |
| 339790.5 | 104223.5 | [488][M+1]+  |            | 200 |
| 959073.2 | 2528062  |              |            | 190 |
| 18586368 | 93928819 | [269][M]+    | [M+H-H2O]  | 103 |
| 723690.2 | 1290035  |              |            | 179 |
| 7648625  | 6580170  | [660][M]+    | [M+H+NH3   | 168 |
| 376409.2 | 280059.2 |              |            | 86  |
| 1418664  | 687104.5 | [1564][M+1]+ |            | 29  |
| 32577272 | 20785266 | [1205][M]+   | [M+Na+NH   | 18  |
| 312403.3 | 989099.4 |              |            | 89  |
| 34344.32 | 56917.83 | [623][M+1]+  |            | 49  |
| 305980.8 | 1488034  |              | [M+2H]2+ : | 11  |
| 68893.08 | 158119.8 | [67][M+1]+   |            | 221 |
| 401440.8 | 337143.6 |              |            | 425 |
| 488411.3 | 1473049  |              |            | 27  |
| 270004   | 299186.6 | [102][M+2]+  |            | 93  |
| 57501.27 | 1240574  | [890][M+1]+  |            | 37  |
| 1085618  | 2149819  | [955][M+2]+  |            | 52  |
| 7170005  | 7029227  |              |            | 157 |
| 531098.2 | 4187131  | [615][M]+    |            | 96  |
| 1907718  | 2899045  | [853][M+2]+  |            | 2   |
| 1107280  | 1420427  |              |            | 93  |
| 1330203  | 764207.2 | [1487][M+1]+ |            | 325 |
| 33995.77 | 301651.9 |              | [M+H]+ 38: | 199 |
| 2841172  | 2635851  |              |            | 20  |
| 32159745 | 40249967 | [160][M+1]+  |            | 16  |
| 656345.1 | 317099.5 |              |            | 430 |
| 434133.5 | 2942904  |              | [M+K+NH3   | 11  |
| 154891.7 | 341764.8 |              |            | 12  |
| 207246.2 | 1181764  | [1161][M+1]+ |            | 49  |
| 444823.5 | 470400   |              | [M+2H-CO(  | 104 |
| 85506.42 | 106013.7 |              |            | 120 |

|          |          |                       |     |
|----------|----------|-----------------------|-----|
| 7796366  | 21354553 | [26][M+1]+            | 4   |
| 841632.4 | 223645.6 | [M+H-CO]+             | 304 |
| 145089.9 | 187857.7 |                       | 39  |
| 886200.9 | 1394466  | [1056][M]+            | 71  |
| 154159   | 279937.9 | [1078][M+1]+          | 169 |
| 7205413  | 7290025  | [1287][M+1]+          | 35  |
| 231449.9 | 112652.8 |                       | 29  |
| 5582168  | 33186744 | [435][M]+ [M+K]+ 31!  | 103 |
| 315488.9 | 332920.3 | [607][M+1]+           | 107 |
| 810184.5 | 2329258  | [1567][M]2+           | 11  |
| 515835.6 | 4141535  | [678][M]+             | 124 |
| 317141.1 | 628431.7 | [M+K+NH3              | 221 |
| 57005.07 | 391300.3 |                       | 97  |
| 138247.1 | 186864.2 | [745][M+1]+           | 116 |
| 284747   | 934408.5 | [M+2K-H]+             | 243 |
| 586155.1 | 705328.9 | [1443][M+2]+          | 29  |
| 32532.26 | 2523097  |                       | 124 |
| 619765.5 | 464244.6 | [1015][M+1]+          | 116 |
| 70812988 | 2.42E+08 | [59][M]2+ [M+H+Na]2   | 4   |
| 116546.4 | 198358.7 |                       | 169 |
| 1096042  | 429622.9 | [1128][M]2+           | 25  |
| 174332.9 | 135461.6 |                       | 218 |
| 5441390  | 3866564  | [713][M]+ [M+Na]+ 4:  | 188 |
| 1366298  | 1195207  | [M+H]+ 27!            | 75  |
| 338241.3 | 352985   |                       | 52  |
| 10091404 | 18491667 | [453][M+2]+           | 1   |
| 881349.4 | 918665.8 | [1037][M]+            | 372 |
| 274488.1 | 255627.6 | [M+Na]+ 3:            | 134 |
| 2472902  | 1875067  |                       | 45  |
| 109945.4 | 202094.2 | [M+H-C6H8             | 49  |
| 1409917  | 4912488  | [1224][M+1]+          | 49  |
| 1535911  | 1523021  |                       | 80  |
| 237175.9 | 539007.4 | [M+Na]+ 3:            | 103 |
| 343020.6 | 420734.5 |                       | 87  |
| 376799.1 | 322032.4 |                       | 330 |
| 80143.7  | 1002118  |                       | 209 |
| 31851065 | 18965378 | [1285][M]+ [M+K+NH3   | 18  |
| 185958.1 | 1546263  | [M+K]+ 50!            | 49  |
| 866424   | 531933.2 |                       | 104 |
| 13612625 | 15573000 |                       | 22  |
| 2137704  | 3072276  |                       | 103 |
| 1.84E+08 | 2.28E+08 | [160][M]+ [M+H]+ 27!  | 16  |
| 6924125  | 6786891  |                       | 146 |
| 6655761  | 8791350  |                       | 148 |
| 292478.8 | 1911852  | [547][M+4]+           | 55  |
| 748551.8 | 356539.6 | [1504][M]+ [M+H]+ 85! | 134 |
| 46481.11 | 931529   | [656][M+1]+           | 97  |

|          |          |                       |     |
|----------|----------|-----------------------|-----|
| 22559642 | 3094667  | [1014][M]+ [M+K]+ 498 | 249 |
| 4718338  | 4818664  | [1023][M+1]+          | 263 |
| 2380416  | 2387510  |                       | 10  |
| 1351242  | 848996.1 |                       | 236 |
| 414853.1 | 2784909  | [2M+2K-H]             | 11  |
| 505092.6 | 802026.4 |                       | 113 |
| 1144171  | 4902673  | [179][M]+ [M+H-C6H8   | 104 |
| 602613.5 | 159857.4 |                       | 25  |
| 133350.2 | 61050.54 |                       | 134 |
| 285515.3 | 193566.4 | [1216][M+1]+          | 29  |
| 280791.5 | 463064.4 |                       | 290 |
| 1551832  | 2014425  |                       | 182 |
| 762895.4 | 53704.57 |                       | 287 |
| 890854.3 | 581170.4 | [M+Na+Na              | 4   |
| 129481.9 | 1578048  |                       | 124 |
| 866037.2 | 946100   |                       | 204 |
| 843281.5 | 3430439  |                       | 233 |
| 130987.1 | 1225473  | [M+H]+ 28             | 90  |
| 110920.3 | 2250096  | [3M+H+K]2             | 103 |
| 7371109  | 22287524 | [481][M]2+            | 1   |
| 5474054  | 3974585  | [M+H]+ 40             | 168 |
| 515120.6 | 362557.8 |                       | 183 |
| 11922055 | 12302201 | [320][M+1]+           | 2   |
| 73570.68 | 435819.8 |                       | 77  |
| 2082294  | 1415602  |                       | 355 |
| 2887531  | 2050802  | [995][M]+             | 29  |
| 2401819  | 633293   |                       | 299 |
| 1630490  | 814901.7 | [1185][M]+            | 111 |
| 4990210  | 5136974  | [M+H]+ 21             | 172 |
| 2648582  | 2467561  | [903][M]+ [M+H]+ 49   | 229 |
| 27810108 | 1.49E+08 | [1166][M]2+           | 7   |
| 687715.2 | 1345984  |                       | 26  |
| 681597.1 | 598145.5 |                       | 193 |
| 1774213  | 2055279  | [79][M]+ [M+H]+ 23    | 218 |
| 1452153  | 11904451 | [703][M]+             | 290 |
| 153067.2 | 150376.7 | [M+2K]2+ 6            | 60  |
| 1122981  | 784719.7 |                       | 171 |
| 170152.1 | 776014.8 |                       | 50  |
| 1013999  | 751570.1 |                       | 9   |
| 771816.5 | 2280615  | [1296][M]+ [M+Na]+ 6  | 49  |
| 216080.2 | 911360.6 | [580][M+2]+           | 14  |
| 9908459  | 1440255  |                       | 2   |
| 588875.4 | 426969.2 |                       | 297 |
| 120778.8 | 97924.53 | [M+K]+ 46             | 143 |
| 2620335  | 2440897  | [84][M+1]+            | 26  |
| 7586.358 | 890302.6 |                       | 103 |
| 2020445  | 1181902  | [1383][M+1]+          | 246 |

|          |          |                       |     |
|----------|----------|-----------------------|-----|
| 3031763  | 2168125  | [M+H-CH2]             | 153 |
| 4863468  | 3376938  |                       | 191 |
| 677850.7 | 694532.7 |                       | 93  |
| 1253062  | 1206715  | [1522][M]+            | 214 |
| 19298116 | 1.32E+08 | [1445][M+2]+          | 1   |
| 2696269  | 1291419  | [1012][M]+            | 56  |
| 18898184 | 31502977 | [177][M]+             | 258 |
| 759610.5 | 954927.2 | [821][M]+             | 199 |
| 224613.6 | 497398.2 |                       | 340 |
| 88716.06 | 225512.2 | [105][M+1]+           | 230 |
| 2500640  | 19671392 |                       | 1   |
| 62497.71 | 256668.8 | [779][M+1]+           | 235 |
| 122154.8 | 96253.34 |                       | 52  |
| 1794608  | 12000902 | [269][M+1]+           | 103 |
| 1326416  | 1401885  |                       | 135 |
| 20128683 | 8542904  | [259][M]+             | 61  |
| 108326.9 | 486762.1 | [439][M+1]+           | 41  |
| 1198823  | 4488993  | [48][M]2+             | 20  |
| 1089891  | 882480.3 | [1320][M]+ [M+H-C4H8] | 34  |
| 590933.7 | 730653.4 |                       | 35  |
| 1955405  | 3597036  | [501][M+1]2+          | 1   |
| 711744.6 | 307809.3 |                       | 114 |
| 3038177  | 2652154  | [287][M+2]+           | 83  |
| 599439.7 | 78757.8  | [2M+K]+ 2:            | 172 |
| 27258.92 | 63718.74 | [M+H-CH2]             | 49  |
| 205527.1 | 214641.5 | [M+2H-C6H6]           | 214 |
| 1732182  | 1725766  |                       | 384 |
| 164605.8 | 632062.1 | [M+H+NH3]             | 55  |
| 611015.5 | 804466.6 | [469][M+1]+           | 125 |
| 119703.7 | 44024.22 | [M+H]+ 52:            | 18  |
| 4675116  | 20674303 | [924][M+2]+           | 11  |
| 418845.9 | 143140.4 | [1075][M+2]+          | 222 |
| 697525.8 | 1574072  | [550][M]+ [M+K]+ 34:  | 169 |
| 1942308  | 2178811  | [1221][M]+            | 10  |
| 84608.56 | 1665547  | [M+H-H2O]             | 209 |
| 219146.8 | 22438444 | [M+K+NH3]             | 208 |
| 587982.2 | 476297.7 | [839][M]+ [M+H+NH3]   | 207 |
| 6085028  | 8056223  |                       | 290 |
| 490561   | 3565028  |                       | 7   |
| 2329419  | 1269220  | [1552][M+1]+          | 232 |
| 624713.9 | 580371.2 |                       | 35  |
| 139065.3 | 424880.4 |                       | 124 |
| 2204945  | 2613144  | [226][M]+             | 376 |
| 1689634  | 2331043  | [627][M]+             | 20  |
| 203258   | 328412.2 | [176][M+1]+           | 160 |
| 385093.1 | 97184.77 |                       | 16  |
| 23759858 | 22650647 |                       | 134 |

|          |          |                       |     |
|----------|----------|-----------------------|-----|
| 2848433  | 3178260  |                       | 227 |
| 26624.68 | 85707.97 | [M+K+NaCl             | 133 |
| 462004.1 | 201140.3 |                       | 300 |
| 90004.88 | 329833.1 | [M+Na]+ 7:            | 49  |
| 14600.28 | 528634.4 |                       | 152 |
| 7242285  | 5255213  |                       | 355 |
| 4937430  | 4526826  |                       | 100 |
| 916845.7 | 414852.1 | [591][M+3]+           | 23  |
| 368740.4 | 90481.27 | [1081][M+1]+          | 113 |
| 1802823  | 4226129  | [483][M+1]+           | 40  |
| 7461959  | 4961343  | [1423][M]+            | 143 |
| 3966014  | 3128927  | [M+H+NH3              | 217 |
| 7397794  | 4440638  | [728][M+2]+           | 35  |
| 899040   | 2098188  |                       | 195 |
| 235386.5 | 154145.6 | [545][M+1]+           | 19  |
| 1370845  | 6100658  |                       | 124 |
| 524315.6 | 270917   | [77][M+1]+            | 217 |
| 14651833 | 9443038  | [1415][M]+            | 140 |
| 7694109  | 6031350  | [69][M]+              | 83  |
| 223369.9 | 117225.4 | [M+Na]+ 5:            | 29  |
| 2568516  | 9019146  | [141][M+1]2+          | 11  |
| 803872.7 | 9627589  | [M+H+NH3              | 143 |
| 92106.32 | 86214.93 |                       | 60  |
| 147978.7 | 3598266  | [1066][M]+ [M+Na]+ 5: | 83  |
| 350388.6 | 595849.9 | [1095][M+2]+          | 160 |
| 480591.1 | 642866.1 | [M+H-HCO              | 11  |
| 666771.4 | 1419505  |                       | 169 |
| 1134931  | 1372347  |                       | 2   |
| 568775.3 | 892499.9 |                       | 281 |
| 19301441 | 25166471 | [M+2H-H2O             | 29  |
| 42203.58 | 1758075  |                       | 172 |
| 47757.83 | 137884.1 |                       | 19  |
| 159893   | 126009.7 | [135][M+1]+           | 103 |
| 867352.5 | 548216.5 |                       | 236 |
| 574250.2 | 9916324  |                       | 373 |
| 54185.78 | 4058702  |                       | 199 |
| 2453872  | 3024412  | [M+H-H2O]             | 311 |
| 1503571  | 1227677  |                       | 132 |
| 258930.3 | 2558485  | [681][M+2]+           | 55  |
| 21445.22 | 1399138  |                       | 196 |
| 351281.4 | 563686.2 |                       | 251 |
| 115338.3 | 161826.4 | [M+K]+ 87:            | 245 |
| 1980632  | 2709527  | [885][M+2]+           | 2   |
| 565488.3 | 2300941  | [M+H]+ 45:            | 11  |
| 45967.36 | 2779199  | [M+K]+ 17:            | 199 |
| 301155.4 | 424630   | [M+K+HCO              | 177 |
| 1225273  | 1127748  |                       | 390 |



|          |          |                       |     |
|----------|----------|-----------------------|-----|
| 278117.8 | 2649741  |                       | 97  |
| 537226.8 | 5403753  | [547][M+2]+           | 55  |
| 256346.7 | 164523.8 |                       | 277 |
| 74179.38 | 462857.6 |                       | 93  |
| 7188269  | 5688717  |                       | 198 |
| 8639883  | 10159926 | [674][M+1]2+          | 4   |
| 235594.9 | 530546.9 |                       | 231 |
| 287593.7 | 406404.1 | [272][M+1]+           | 114 |
| 403220.8 | 406488   | [568][M+2]+           | 112 |
| 4547717  | 4272451  |                       | 1   |
| 192145.1 | 255337.1 |                       | 165 |
| 2046854  | 1631733  |                       | 236 |
| 194644.4 | 1588870  | [28][M+1]+            | 133 |
| 3026830  | 2583564  |                       | 198 |
| 3268078  | 1439732  | [M+K]+ 24€            | 78  |
| 51798149 | 69279644 | [621][M+1]+           | 9   |
| 1798802  | 1325466  | [584][M]+             | 23  |
| 25572917 | 20741469 | [343][M+1]+           | 79  |
| 427690   | 728983.5 |                       | 164 |
| 2812333  | 2337493  | [1143][M]+ [M+Na]+ 5! | 151 |
| 53362.28 | 1098281  | [M+K]+ 37€            | 103 |
| 91423.45 | 3881775  | [2M+K]+ 2€            | 103 |
| 521952.1 | 460241.6 |                       | 104 |
| 489903.7 | 1197174  | [M+K]+ 41€            | 289 |
| 1616690  | 9962865  | [889][M]+             | 20  |
| 15685685 | 5443524  |                       | 18  |
| 348270.5 | 498564.5 |                       | 356 |
| 2194845  | 2928532  | [312][M]+             | 292 |
| 564593.8 | 188595.9 | [1012][M+1]+          | 56  |
| 75677.76 | 310277.4 | [3M+3K-H]             | 55  |
| 282926.5 | 320558.6 |                       | 24  |
| 751366.5 | 861461.2 |                       | 136 |
| 356058.2 | 2073230  |                       | 11  |
| 409188.2 | 810204.4 | [557][M+2]+           | 61  |
| 790445.4 | 463865.1 | [342][M+1]+           | 83  |
| 280504.3 | 563631.8 |                       | 169 |
| 442581.5 | 1119575  |                       | 195 |
| 35912.96 | 1324077  |                       | 104 |
| 277716.8 | 288302   |                       | 29  |
| 1619298  | 4636014  |                       | 7   |
| 649372   | 642939.5 | [M+K]+ 42€            | 251 |
| 1047735  | 744435.4 | [1502][M+2]+          | 85  |
| 1160075  | 447891.7 |                       | 294 |
| 318946   | 180273.8 | [1320][M+1]+          | 34  |
| 7455243  | 10693331 | [5][M]+               | 258 |
| 1251287  | 1218038  | [M+Na+Na              | 11  |
| 2723452  | 14929497 | [746][M+1]2+          | 11  |

|          |          |                       |     |
|----------|----------|-----------------------|-----|
| 4455234  | 3468179  | [1502][M+1]+          | 85  |
| 279692   | 1871863  |                       | 324 |
| 4016196  | 5505121  |                       | 11  |
| 72300.74 | 1295885  |                       | 103 |
| 2382019  | 4868507  | [697][M+1]+           | 235 |
| 763910.7 | 1257478  | [973][M+1]+           | 164 |
| 1776235  | 5791450  |                       | 1   |
| 11471.92 | 334285.5 |                       | 196 |
| 47467.37 | 106608.9 |                       | 62  |
| 9334406  | 13180320 | [885][M+1]+           | 2   |
| 1531166  | 1125498  |                       | 383 |
| 4666221  | 2736141  | [1383][M]+ [M+H]+ 72: | 246 |
| 169130.6 | 445263.2 | [1390][M+1]+          | 95  |
| 178511.4 | 409379.1 | [175][M+1]+           | 396 |
| 778888   | 3529476  | [864][M]+             | 90  |
| 387797.2 | 164328.4 |                       | 153 |
| 121249.3 | 3202438  |                       | 83  |
| 619738.8 | 1013373  | [3M+Na+3I             | 16  |
| 440785.2 | 306381.7 | [344][M+1]+           | 288 |
| 661857.7 | 488378.3 |                       | 189 |
| 1408142  | 892484.1 | [1556][M]+ [M+K]+ 99: | 25  |
| 2063120  | 867308.9 | [666][M+1]+           | 23  |
| 7136545  | 5852771  | [231][M]+ [M+K]+ 26:  | 153 |
| 347849.3 | 1570400  | [636][M+1]+           | 49  |
| 1178803  | 1991119  | [268][M+1]+           | 26  |
| 1485923  | 1397361  | [665][M+1]+           | 123 |
| 124600.2 | 46924202 |                       | 52  |
| 45891.11 | 574910   |                       | 129 |
| 3167899  | 1461030  |                       | 446 |
| 2306848  | 2552426  |                       | 197 |
| 4809687  | 17978446 | [1224][M]+ [M+Na]+ 6: | 49  |
| 280273.1 | 79067.15 |                       | 29  |
| 1299975  | 11193928 |                       | 327 |
| 127455.3 | 150714.6 | [619][M+1]+           | 449 |
| 378947   | 1650232  |                       | 20  |
| 18936953 | 20334478 | [493][M]+             | 2   |
| 86037.13 | 7213.412 |                       | 364 |
| 4019612  | 2961338  | [1552][M]+ [M+H]+ 10: | 232 |
| 1042239  | 1407633  | [158][M]+ [M+H]+ 27:  | 60  |
| 666851.8 | 682560.3 | [404][M+1]+           | 374 |
| 1809482  | 1270987  | [604][M]+             | 23  |
| 330311.3 | 303348.8 |                       | 202 |
| 32277.67 | 68949.85 |                       | 202 |
| 37429.94 | 154358.5 |                       | 255 |
| 1398036  | 3349719  | [M+K]+ 74:            | 11  |
| 3428069  | 2956320  | [480][M+2]+           | 4   |
| 322574.5 | 369506.5 |                       | 221 |

|          |          |                      |     |
|----------|----------|----------------------|-----|
| 2962543  | 269052.8 | [M+K]+ 36:           | 55  |
| 1808230  | 5237167  | [37][M]2+ [M+H+K]2+  | 8   |
| 323783.2 | 351306.8 |                      | 29  |
| 9446095  | 5700063  | [1285][M+1]+         | 18  |
| 1285946  | 23433348 |                      | 1   |
| 8446979  | 8587044  | [1071][M]+           | 297 |
| 466316.4 | 147119.5 |                      | 29  |
| 156793   | 120171   | [M+Na]+ 8:           | 34  |
| 244366.9 | 688298.6 | [M+H+NH3             | 11  |
| 244496.4 | 116764.7 | [M+H-CH4]            | 321 |
| 446683.8 | 439354.5 | [M+K]+ 55:           | 60  |
| 854220.5 | 788923.4 | [3M+2Na]2            | 110 |
| 560513.6 | 482888.4 |                      | 75  |
| 549940.9 | 660793.5 |                      | 199 |
| 76054.72 | 675011   |                      | 55  |
| 22644496 | 14655343 | [1352][M]+           | 140 |
| 46645.37 | 584264.6 | [M+Na]+ 3:           | 254 |
| 2199841  | 3654445  | [177][M+1]+          | 258 |
| 5463043  | 4013086  |                      | 355 |
| 65441.51 | 232258.8 |                      | 177 |
| 156054.9 | 1600701  |                      | 258 |
| 987508.9 | 657517.4 | [978][M]2+ [2M+Na+2I | 60  |
| 7194226  | 10919429 |                      | 276 |
| 1633792  | 1255959  |                      | 116 |
| 2401111  | 119002.7 | [938][M+1]+          | 338 |
| 211383.4 | 519633.8 |                      | 231 |
| 1436949  | 1049770  | [1285][M+2]+         | 18  |
| 582781.3 | 1535543  | [1068][M+2]+         | 49  |
| 1383682  | 2271027  | [M+K]+ 42:           | 262 |
| 140641.2 | 3520717  | [M+K+NH3             | 95  |
| 2603251  | 2499760  |                      | 16  |
| 173624.1 | 1609241  | [852][M+1]+          | 166 |
| 6687364  | 3952423  | [931][M]+            | 153 |
| 8765816  | 2877312  |                      | 18  |
| 408973.3 | 296162.3 |                      | 345 |
| 280090.2 | 3151514  | [81][M+1]+           | 199 |
| 179165.1 | 4864938  | [M+Na]+ 3:           | 209 |
| 646725.6 | 1414796  | [M+H]+ 23:           | 104 |
| 448650.2 | 342046.5 |                      | 391 |
| 274649.2 | 559392.2 |                      | 39  |
| 734626.4 | 143322.6 |                      | 29  |
| 374379.9 | 490898.1 | [M+Na+HC             | 26  |
| 4.37E+08 | 5.96E+08 | [668][M+1]+          | 4   |
| 423566.4 | 209173.2 |                      | 443 |
| 16882352 | 8351436  |                      | 5   |
| 5809097  | 5095824  | [857][M+1]+          | 151 |
| 618265.9 | 4064526  | [435][M+1]+          | 103 |

|          |          |                                |     |
|----------|----------|--------------------------------|-----|
| 248190.8 | 230418.5 | [603][M+1]+                    | 111 |
| 7015839  | 4833443  | [1116][M+1]+                   | 216 |
| 429249.9 | 347528.9 | [M+H+Na] <sup>2+</sup>         | 191 |
| 1528472  | 2193348  | [336][M]+ [M+H+NH <sub>3</sub> | 169 |
| 509786.5 | 3428067  | [804][M]+                      | 124 |
| 3165500  | 1721586  | [1219][M+2]+                   | 18  |
| 4428683  | 3527987  | [223][M]+ [M+H]+ 29:           | 217 |
| 1274499  | 511949.2 |                                | 139 |
| 745103   | 1015749  | [M+K]+ 23:                     | 16  |
| 109171.5 | 441704.1 | [955][M+3]+                    | 52  |
| 278880.8 | 513355.5 | [853][M+5] <sup>2+</sup>       | 2   |
| 395071.2 | 184376.5 | [M+Na]+ 4:                     | 160 |
| 665578.9 | 618675.8 | [1025][M+1]+                   | 41  |
| 40990914 | 1.89E+08 | [82][M]+ [M+K]+ 20:            | 55  |
| 830479   | 457850.3 | [391][M]+                      | 45  |
| 332099.2 | 223674.9 |                                | 282 |
| 198008.9 | 268363.1 |                                | 297 |
| 230220.9 | 633373.4 | [219][M+2]+                    | 49  |
| 420111.3 | 787073.4 | [M+K+NH <sub>3</sub>           | 116 |
| 6849302  | 4062240  | [1120][M+1]+                   | 118 |
| 21937.68 | 850527.7 | [M+K]+ 42:                     | 199 |
| 967349.9 | 505743   |                                | 23  |
| 28295.29 | 620998.7 | [M+K+NaCl                      | 103 |
| 593469.4 | 523146.9 | [1448][M+1]+                   | 444 |
| 475691.8 | 320989.3 | [1048][M+1] <sup>2+</sup>      | 29  |
| 843303.3 | 806175.6 |                                | 284 |
| 389587.4 | 276646.3 |                                | 144 |
| 769056.5 | 1474579  |                                | 160 |
| 193795.4 | 132966.3 |                                | 112 |
| 577143   | 205945.7 |                                | 236 |
| 303241.7 | 466883   |                                | 238 |
| 39382.9  | 1847523  | [548][M+1]+                    | 199 |
| 73604.92 | 698632.1 |                                | 55  |
| 491774.6 | 3987895  | [M+H-COCl                      | 103 |
| 52799.57 | 1151251  | [M+K]+ 54:                     | 60  |
| 96207.04 | 101845.8 |                                | 60  |
| 15528289 | 10986311 | [1357][M]+                     | 143 |
| 3000711  | 6559691  | [702][M+1]+                    | 26  |
| 683411.2 | 473833.9 | [995][M+1]+                    | 29  |
| 5514048  | 4199721  | [M+H-CH <sub>3</sub> ]         | 100 |
| 865986   | 938097.2 |                                | 114 |
| 3767107  | 5245514  | [190][M]+ [M+K]+ 25:           | 360 |
| 536615.1 | 491782.9 | [689][M+1] <sup>2+</sup>       | 175 |
| 1310560  | 1804328  | [155][M+1]+                    | 228 |
| 5311524  | 326906.2 | [M+Na]+ 2:                     | 55  |
| 168864.5 | 200986.3 |                                | 81  |
| 92420.53 | 722528.7 | [560][M+3]+                    | 110 |

|          |          |                                      |     |
|----------|----------|--------------------------------------|-----|
| 1729746  | 936736.3 | [M+2H] <sup>2+</sup>                 | 4   |
| 22946362 | 24521906 | [84][M] <sup>+</sup>                 | 26  |
| 206335.2 | 2537724  | [3M+Na+2H] <sup>+</sup>              | 133 |
| 1978525  | 3398684  | [715][M] <sup>+</sup>                | 62  |
| 96596.64 | 384363.7 |                                      | 279 |
| 767096.4 | 23758067 | [M+H] <sup>+</sup> 210               | 127 |
| 69124.97 | 73088.46 |                                      | 428 |
| 89902.28 | 111799.8 |                                      | 55  |
| 513337.4 | 795925.2 | [570][M+1] <sup>+</sup>              | 110 |
| 23489.4  | 517203.6 | [299][M+1] <sup>+</sup>              | 103 |
| 2264755  | 1951865  | [445][M] <sup>+</sup>                | 175 |
| 23402636 | 25216813 | [569][M+2] <sup>+</sup>              | 100 |
| 375693.5 | 840229.7 |                                      | 2   |
| 178473.2 | 154754.4 | [498][M+2] <sup>+</sup>              | 20  |
| 561231.1 | 309671.4 | [M+Na+CF <sub>3</sub> ] <sup>+</sup> | 289 |
| 16502507 | 5098526  |                                      | 2   |
| 361189.9 | 1631255  | [991][M+1] <sup>+</sup>              | 161 |
| 262890.7 | 700036.1 |                                      | 442 |
| 846788.9 | 822461.4 |                                      | 17  |
| 19508012 | 27758745 | [1568][M+1] <sup>+</sup>             | 11  |
| 2408694  | 2207138  | [1025][M] <sup>+</sup>               | 41  |
| 584887   | 1383943  | [M+K] <sup>+</sup> 378               | 49  |
| 408811.5 | 2152033  | [804][M+2] <sup>+</sup>              | 124 |
| 117655.4 | 2.9E+08  |                                      | 22  |
| 598795.7 | 551212.6 | [737][M] <sup>+</sup>                | 35  |
| 7561424  | 4923198  | [1352][M+1] <sup>+</sup>             | 140 |
| 11179.9  | 151265.9 |                                      | 55  |
| 521617   | 409671   | [506][M] <sup>2+</sup>               | 198 |
| 1119074  | 4091839  |                                      | 28  |
| 1801164  | 866496.4 |                                      | 61  |
| 10513815 | 9304886  | [1150][M+1] <sup>+</sup>             | 35  |
| 442858.8 | 458434.1 |                                      | 3   |
| 218715.9 | 325287.8 | [2M+2Na+H] <sup>+</sup>              | 119 |
| 7555987  | 13759097 |                                      | 124 |
| 246695.1 | 2444461  | [3M+Na+K] <sup>+</sup>               | 55  |
| 199739.3 | 155788   |                                      | 314 |
| 230484.3 | 147432.7 |                                      | 362 |
| 42265.8  | 20855.65 | [M+H] <sup>+</sup> 978               | 34  |
| 4978926  | 520945.2 |                                      | 19  |
| 383257.5 | 311944.4 |                                      | 197 |
| 8497.469 | 278716   |                                      | 55  |
| 9175016  | 5563059  | [1205][M+1] <sup>+</sup>             | 18  |
| 1381835  | 2058914  |                                      | 5   |
| 577337.8 | 1681374  | [133][M+1] <sup>+</sup>              | 279 |
| 1.69E+08 | 1013078  |                                      | 6   |
| 878363   | 1104363  | [M+H-COCl] <sup>+</sup>              | 151 |
| 484694.3 | 249605.9 | [968][M+1] <sup>+</sup>              | 18  |

|          |          |                                                |     |
|----------|----------|------------------------------------------------|-----|
| 62590.2  | 1430046  | [M+H] <sup>+</sup> 38:                         | 199 |
| 1087625  | 1082565  |                                                | 189 |
| 251147.5 | 337188.2 |                                                | 10  |
| 553539.3 | 1638976  |                                                | 160 |
| 285915.1 | 1018743  | [146][M+1] <sup>+</sup>                        | 16  |
| 1632480  | 946587.6 | [931][M+1] <sup>+</sup>                        | 153 |
| 2561435  | 491925.5 |                                                | 95  |
| 27979840 | 13986792 | [221][M] <sup>+</sup>                          | 23  |
| 9924345  | 10001525 | [1136][M+1] <sup>+</sup>                       | 17  |
| 229436   | 311808.1 | [M+K+NaCl]                                     | 284 |
| 650791.2 | 1044343  |                                                | 227 |
| 1431497  | 9568167  | [76][M] <sup>+</sup> [M+Na] <sup>+</sup> 2:    | 55  |
| 591392.9 | 2862619  |                                                | 348 |
| 2199259  | 1761703  | [347][M+1] <sup>+</sup>                        | 221 |
| 105226.9 | 54986.51 |                                                | 41  |
| 508567.7 | 253181   | [2M+Na+3I]                                     | 213 |
| 4.06E+09 | 5.3E+09  | [835][M] <sup>+</sup>                          | 2   |
| 11535047 | 46187319 |                                                | 11  |
| 7105330  | 8116389  | [M+K+NH <sub>3</sub> ]                         | 218 |
| 79028.15 | 1037955  |                                                | 439 |
| 276879.4 | 484756.5 |                                                | 336 |
| 104634.7 | 601254.3 | [M+Na] <sup>+</sup> 6:                         | 49  |
| 147559.3 | 364266.5 | [2M+H] <sup>+</sup> 3:                         | 169 |
| 463699.4 | 532873.9 |                                                | 244 |
| 80827.06 | 804539   |                                                | 166 |
| 5970719  | 10613546 |                                                | 187 |
| 5146904  | 3279929  | [1415][M+1] <sup>+</sup>                       | 140 |
| 144592.8 | 801630.6 | [444][M+1] <sup>+</sup>                        | 83  |
| 1461492  | 593015.1 |                                                | 207 |
| 0        | 201327.5 |                                                | 69  |
| 11517688 | 35892414 | [141][M] <sup>2+</sup> [M+2H-H <sub>2</sub> O] | 11  |
| 984842.6 | 516667.8 |                                                | 410 |
| 712791.8 | 11244904 | [1021][M] <sup>+</sup> [M+Na] <sup>+</sup> 5:  | 95  |
| 61128845 | 12313198 |                                                | 1   |
| 64215133 | 1.08E+08 |                                                | 124 |
| 9878.264 | 747079.5 | [3M+2H] <sup>2+</sup>                          | 83  |
| 6293607  | 18010809 | [133][M] <sup>+</sup>                          | 279 |
| 2524000  | 2323998  |                                                | 235 |
| 1696158  | 1629038  |                                                | 2   |
| 78641.3  | 199476.9 | [M+2H-C <sub>5</sub> H <sub>8</sub> ]          | 104 |
| 817666.5 | 677900.8 |                                                | 301 |
| 447611.5 | 220920.1 | [M+Na] <sup>+</sup> 4:                         | 90  |
| 1152234  | 594904.8 |                                                | 128 |
| 201557.7 | 429725.8 | [647][M+1] <sup>+</sup>                        | 137 |
| 2229769  | 2176311  | [M+H-H <sub>2</sub> O]                         | 353 |
| 19377.99 | 1943536  |                                                | 299 |
| 390984.2 | 1337891  | [M+H-C <sub>4</sub> H <sub>8</sub> ]           | 171 |

|          |          |                       |     |
|----------|----------|-----------------------|-----|
| 677998.2 | 478573.1 | [753][M+1]2+          | 32  |
| 568219.8 | 301467.8 | [M+H]+ 36:            | 18  |
| 82316.68 | 196616.8 | [2M+Na+K]             | 95  |
| 9098738  | 4225737  | [1058][M]2+           | 25  |
| 28122718 | 18309070 | [1474][M]+ [M+H]+ 80: | 64  |
| 2887828  | 2776421  |                       | 349 |
| 381601.3 | 548803.5 |                       | 155 |
| 793837.5 | 593984.4 |                       | 416 |
| 11002651 | 7728399  | [1474][M+1]+          | 64  |
| 5585441  | 9083286  |                       | 1   |
| 33032273 | 45981035 | [727][M]+ [M+H+NH3    | 143 |
| 167866.3 | 706586.5 |                       | 89  |
| 1364033  | 1332263  | [739][M+1]+           | 75  |
| 2773962  | 1272470  | [221][M+1]+           | 23  |
| 226186.4 | 170318.4 |                       | 109 |
| 396165.7 | 484600.7 | [M+K+NH3              | 16  |
| 5258743  | 6474709  | [598][M]+             | 348 |
| 472190.8 | 58654.41 |                       | 446 |
| 303668.8 | 308631.5 | [522][M+1]+           | 159 |
| 441383.9 | 594620   | [96][M+1]+            | 103 |
| 196729.8 | 349609.4 | [1071][M+3]+          | 297 |
| 2465318  | 1891493  | [776][M]2+            | 200 |
| 103918   | 112878.5 | [1517][M+1]+          | 47  |
| 4294360  | 5064885  |                       | 128 |
| 837944.2 | 184065.1 | [M+H]+ 32:            | 103 |
| 2227001  | 4995026  | [279][M]+             | 65  |
| 660414   | 371709.2 | [1556][M+1]+          | 25  |
| 2634608  | 1705619  | [1467][M+1]+          | 343 |
| 527073.1 | 2539664  | [3M+2K]2+             | 209 |
| 4703715  | 6539849  | [89][M]+              | 326 |
| 5265288  | 3517968  | [1357][M+1]+          | 143 |
| 76893.5  | 3070702  | [703][M+1]+           | 290 |
| 5526920  | 12222988 |                       | 328 |
| 4103389  | 3414752  | [650][M]+ [2M+Na]+ :  | 217 |
| 36594722 | 32361990 | [1150][M]+            | 35  |
| 610084.6 | 658714.8 | [M+H]+ 69:            | 60  |
| 44991861 | 45460783 | [1002][M]+ [M+K+NH3   | 143 |
| 2327816  | 8718276  | [M+Na]+ 4:            | 11  |
| 5941667  | 7569389  | [749][M+1]+           | 2   |
| 405946   | 6593510  |                       | 79  |
| 1875490  | 3997979  | [1069][M+2]+          | 2   |
| 3506703  | 1352113  | [1058][M+1]2+         | 25  |
| 1736736  | 1404121  | [458][M+1]+           | 313 |
| 2721466  | 1978619  | [M+K]+ 28:            | 277 |
| 1018321  | 793971   | [949][M]+             | 343 |
| 1744281  | 9439950  | [636][M]+ [M+Na]+ 3:  | 49  |
| 725025.6 | 466736.8 |                       | 41  |

|          |          |                     |     |
|----------|----------|---------------------|-----|
| 209460.7 | 279646.8 | [1450][M+1]+        | 314 |
| 41866398 | 50158871 | [868][M]+ [M+H+NH3  | 143 |
| 830758.6 | 751623.7 |                     | 285 |
| 12817821 | 20660387 | [94][M]2+           | 2   |
| 1421879  | 2217309  | [891][M]+           | 37  |
| 158639.6 | 359790.6 |                     | 317 |
| 33218928 | 27553874 | [1208][M]+ [M+K+NH3 | 143 |
| 1751039  | 325274.8 | [1512][M+1]+        | 18  |
| 438950.3 | 65092.2  | [1416][M+1]+        | 45  |
| 13504028 | 51462200 |                     | 11  |
| 15875540 | 15584995 | [M+Na]+ 3:          | 146 |
| 1609.335 | 32728480 |                     | 59  |
| 75840.63 | 24842.36 |                     | 93  |
| 1933024  | 2749969  | [183][M]+           | 315 |
| 72482    | 1068381  |                     | 95  |
| 809261.4 | 473731.2 |                     | 200 |
| 3801732  | 2098380  | [370][M]+           | 35  |
| 351211.3 | 340604.9 | [287][M+3]+         | 83  |
| 164643.7 | 477667.5 | [429][M+1]2+        | 288 |
| 26379003 | 59496392 |                     | 54  |
| 1640447  | 1187397  | [860][M+1]+         | 236 |
| 351847.9 | 744750.7 | [955][M+4]+         | 52  |
| 3254229  | 5706577  | [246][M]2+          | 12  |
| 78029.84 | 3290503  | [M+H-CO]+           | 95  |
| 725365.9 | 923591   |                     | 277 |
| 1864353  | 1624360  | [M+K]+ 27:          | 47  |
| 4399298  | 3698064  | [M+Na]+ 2:          | 263 |
| 738820.9 | 207742.9 | [M+2H]2+ :          | 309 |
| 249770.4 | 718575.1 |                     | 49  |
| 487479   | 185653.2 | [3M+2Na+]           | 342 |
| 88614.83 | 63457.57 |                     | 34  |
| 480782.2 | 7204266  |                     | 171 |
| 244280.1 | 422076.3 |                     | 55  |
| 1208485  | 1807821  |                     | 154 |
| 3881883  | 19838155 |                     | 1   |
| 193074.4 | 111887   | [M+Na]+ 5:          | 144 |
| 379885.7 | 774103.5 | [197][M+1]+         | 49  |
| 1618681  | 801211.6 |                     | 354 |
| 1876675  | 2114835  | [M+H]+ 18:          | 311 |
| 3437165  | 2001590  | [518][M]+           | 236 |
| 3937751  | 6171228  | [893][M+1]+         | 169 |
| 40815.34 | 1460752  |                     | 55  |
| 70056.8  | 2035586  |                     | 345 |
| 197050.8 | 21080.16 | [M+K+NH3            | 47  |
| 257034.1 | 398189.4 | [277][M+1]+         | 22  |
| 338584.7 | 2088531  |                     | 78  |
| 4677797  | 4113185  | [M+H]+ 48:          | 232 |



|          |          |                       |     |
|----------|----------|-----------------------|-----|
| 835896   | 826749.4 |                       | 364 |
| 204729.6 | 792850.8 |                       | 10  |
| 906041.9 | 7453807  |                       | 1   |
| 81310.46 | 155411.6 | [685][M+1]+           | 169 |
| 7901.015 | 495436   | [M+H]+ 27             | 55  |
| 28354765 | 2726575  |                       | 6   |
| 979094.5 | 1013214  |                       | 119 |
| 2467770  | 984475.8 | [712][M+1]+           | 52  |
| 1227899  | 2977350  | [704][M]2+ [M+2H]2+ : | 11  |
| 41309412 | 37332981 | [1121][M]+ [M+K+NH3   | 143 |
| 560263.8 | 815649.7 | [387][M+1]+           | 31  |
| 341287.3 | 644742.3 | [M+K]+ 22             | 29  |
| 1140474  | 586446   | [1052][M+1]+          | 213 |
| 1127385  | 1236061  |                       | 3   |
| 583913.5 | 277665.5 | [M+H-CO2]             | 208 |
| 1006237  | 626299.3 | [1077][M+1]+          | 143 |
| 42476.11 | 176051.9 | [M+2K]2+ :            | 52  |
| 471038.4 | 469358   |                       | 22  |
| 1000210  | 1278121  |                       | 22  |
| 243322.9 | 369266.4 | [M+K]+ 20             | 232 |
| 840458.4 | 869578.3 |                       | 43  |
| 3031768  | 17159428 | [164][M+1]+           | 55  |
| 273031.3 | 1532738  | [594][M+3]+           | 49  |
| 413512.3 | 1866363  | [M+K]+ 35             | 55  |
| 1147465  | 961143.9 | [1293][M+2]+          | 143 |
| 285330.3 | 131199.4 |                       | 96  |
| 482649.1 | 294671.5 |                       | 168 |
| 257939   | 334843   | [336][M+1]+           | 169 |
| 5652.28  | 436877.3 |                       | 224 |
| 526919.8 | 324527.7 | [386][M]2+            | 46  |
| 797044.9 | 871490.7 | [M+H-C6H8             | 96  |
| 1996859  | 2550158  | [766][M+1]+           | 159 |
| 654513.6 | 503224.6 | [903][M+1]+           | 229 |
| 469543.4 | 7394571  |                       | 234 |
| 90784.9  | 40914.63 | [M+K]+ 93             | 34  |
| 746140.1 | 170533.1 |                       | 254 |
| 13260911 | 35609323 |                       | 1   |
| 1322576  | 751672.1 | [M+Na+K]2             | 29  |
| 852960.7 | 2925976  | [439][M]+             | 41  |
| 247464.5 | 146446.7 | [728][M+3]+           | 35  |
| 451326.7 | 254149.6 | [993][M+1]+           | 18  |
| 5107247  | 4068727  | [327][M]+ [M+K]+ 29   | 118 |
| 9317.462 | 152459.9 |                       | 133 |
| 361822.5 | 451159.8 |                       | 412 |
| 772070.4 | 4058892  | [54][M+1]2+           | 4   |
| 382111.9 | 1197505  |                       | 69  |
| 143388.1 | 222545.9 |                       | 241 |

|          |          |                                      |     |
|----------|----------|--------------------------------------|-----|
| 2472181  | 2462870  |                                      | 215 |
| 302514.2 | 364756.2 |                                      | 106 |
| 2153306  | 16985756 |                                      | 55  |
| 11935755 | 12063044 | [1002][M+1]+                         | 143 |
| 696191   | 833254.5 | [598][M+1]+                          | 348 |
| 111599.5 | 2416176  | [1021][M+1]+                         | 95  |
| 9590.032 | 586957.3 |                                      | 104 |
| 797837.2 | 12879768 |                                      | 1   |
| 560393.6 | 527417.4 | [595][M+1]+                          | 205 |
| 3143081  | 2840844  |                                      | 282 |
| 1479853  | 2253641  | [533][M]+                            | 19  |
| 141996   | 347427.4 |                                      | 49  |
| 492889.5 | 704282.7 | [1141][M]+                           | 29  |
| 29712016 | 27294197 |                                      | 213 |
| 220339.6 | 8013436  | [1088][M]+ [M+Na+CF <sub>3</sub> ]   | 55  |
| 114588.4 | 1439912  | [1088][M+1]+                         | 55  |
| 235264.7 | 144759.4 | [1145][M+1]+                         | 338 |
| 728908.1 | 1308674  | [M+H-CH <sub>4</sub> ]               | 86  |
| 180388.5 | 624578.4 |                                      | 210 |
| 826859.8 | 1437826  | [246][M+1] <sub>2</sub> +            | 12  |
| 391333.1 | 580955.3 |                                      | 106 |
| 996472.1 | 16380623 |                                      | 1   |
| 1.57E+08 | 1.47E+08 | [147][M]+ [M+H]+ 27:                 | 66  |
| 888911.5 | 529429.5 | [927][M+1]+                          | 329 |
| 337759.8 | 1802043  |                                      | 49  |
| 421432.5 | 369490.9 | [M+H]+ 58:                           | 132 |
| 97582.18 | 82010.93 |                                      | 315 |
| 1635145  | 2418863  |                                      | 381 |
| 1857648  | 1510457  | [622][M]+                            | 117 |
| 2388108  | 2422408  | [M+H-C <sub>2</sub> H <sub>4</sub> ] | 112 |
| 497551.7 | 722748.7 | [M+K]+ 26:                           | 27  |
| 23570059 | 18182561 | [1293][M]+ [M+K+NH <sub>3</sub> ]    | 143 |
| 123270.9 | 747064.3 | [365][M+2]+                          | 91  |
| 1773970  | 3167973  | [M+H]+ 30:                           | 218 |
| 1616021  | 1012860  | [1041][M+3]+                         | 29  |
| 293926.5 | 2048340  | [406][M]+ [M+Na]+ 3:                 | 186 |
| 7562420  | 11596038 |                                      | 80  |
| 29921075 | 19545491 | [901][M+1]+                          | 75  |
| 1551409  | 6120389  | [8][M] <sub>2</sub> +                | 83  |
| 167775   | 74778.68 | [928][M+1]+                          | 32  |
| 523024.1 | 334361   | [426][M+1]+                          | 14  |
| 546907   | 1282087  |                                      | 269 |
| 1421773  | 431640.1 | [M+K+HCO <sub>2</sub> ]              | 23  |
| 4546886  | 5718709  | [1064][M+1]+                         | 96  |
| 256294.6 | 410494.4 |                                      | 254 |
| 93782.82 | 374821.2 |                                      | 293 |
| 509900.3 | 402349.5 | [M+H-COCl]                           | 22  |

|          |          |                       |     |
|----------|----------|-----------------------|-----|
| 772583.6 | 4092415  | [1389][M]+            | 10  |
| 977070.6 | 9695852  | [852][M]+             | 166 |
| 145233.6 | 970108.4 | [2M+H]+ 2:            | 104 |
| 3722267  | 4096881  | [M+Na]+ 4:            | 100 |
| 249212   | 1889891  | [889][M+1]+           | 20  |
| 354303.4 | 2440372  | [631][M+1]+           | 83  |
| 1172871  | 21523596 |                       | 1   |
| 48791.86 | 240223.1 | [M+K+NH3              | 104 |
| 2031214  | 971934.4 | [M+Na]+ 2:            | 104 |
| 526897.9 | 87460.33 |                       | 18  |
| 305129.6 | 349145.8 |                       | 29  |
| 15756392 | 5683203  | [591][M+2]+           | 23  |
| 358649.6 | 260886.5 |                       | 256 |
| 1444823  | 2041874  |                       | 170 |
| 129057.2 | 60076.19 | [M+H+HCC              | 29  |
| 30114842 | 40632773 | [1568][M]+ [3M+Na]+ : | 11  |
| 441765.9 | 751362.1 |                       | 174 |
| 1488141  | 1295658  | [1121][M+2]+          | 143 |
| 630503   | 880567.4 | [18][M+1]+            | 97  |
| 7401318  | 4771072  | [342][M]+ [M+Na]+ 3:  | 83  |
| 2206238  | 31367443 | [M+H+HCC              | 79  |
| 217218.6 | 84072.34 | [M+H-CO2]             | 104 |
| 115494.8 | 278059   |                       | 20  |
| 2657915  | 2559950  | [254][M]+ [M+Na]+ 2:  | 112 |
| 32893.61 | 142069.7 |                       | 105 |
| 497007.5 | 5391729  |                       | 346 |
| 1186303  | 5572663  | [614][M]+ [M+K]+ 36:  | 171 |
| 683042.3 | 969775.9 | [M+H-H2O]             | 25  |
| 401077.1 | 433060.6 | [M+H-COCl             | 119 |
| 4405682  | 5625426  |                       | 136 |
| 26553560 | 1.72E+08 |                       | 1   |
| 479006.6 | 745605.4 | [M+K+NH3              | 47  |
| 292204.9 | 120012   |                       | 29  |
| 1474402  | 2205175  | [554][M]+             | 19  |
| 1614602  | 8820958  | [M+H-H2O]             | 11  |
| 644512.3 | 951826.6 |                       | 10  |
| 17363923 | 20868269 | [1064][M]+            | 96  |
| 363081.3 | 298614.3 | [M+2H]2+              | 321 |
| 526228.8 | 302938.3 | [1423][M+2]+          | 143 |
| 1250262  | 93033.9  | [M+H]+ 75:            | 217 |
| 2185441  | 2327793  | [913][M]2+            | 2   |
| 4172037  | 6415946  | [721][M+1]+           | 4   |
| 21166186 | 1718288  | [M+Na]+ 4:            | 4   |
| 0        | 2384.479 |                       | 62  |
| 900234.8 | 873284.4 |                       | 41  |
| 340380.6 | 255904.3 | [M+Na]+ 7:            | 33  |
| 81692.85 | 709433.1 |                       | 359 |

|          |          |                    |     |
|----------|----------|--------------------|-----|
| 120793.6 | 756374.3 | [2M+Na+K]          | 55  |
| 200213.4 | 179553.5 |                    | 139 |
| 297243.1 | 941029.4 | [M+Na]+ 4:         | 11  |
| 139338.4 | 213895.6 |                    | 144 |
| 467762.2 | 513606.2 | [551][M+1]+        | 213 |
| 517831.3 | 240442.8 |                    | 438 |
| 16153552 | 59573079 | [M+Na]+ 9:         | 11  |
| 392820.7 | 450659.1 |                    | 52  |
| 162065.8 | 539746.7 |                    | 209 |
| 973872   | 764667.6 |                    | 445 |
| 93097.03 | 388268.7 | [864][M+1]+        | 90  |
| 150667.1 | 431142.9 |                    | 55  |
| 2825216  | 2674795  | [M+H-CH2]          | 87  |
| 6092642  | 29408809 | [475][M+3]+        | 1   |
| 187363.3 | 753564   | [M+Na]+ 3:         | 178 |
| 1379616  | 345686.7 | [M+H]+ 66:         | 29  |
| 2998962  | 5621134  | [M+Na]+ 4:         | 11  |
| 134027.8 | 407228.9 | [M+2H-CO]          | 107 |
| 90015.38 | 334491.6 | [334][M+1]+        | 221 |
| 164699   | 3756193  |                    | 1   |
| 277513.1 | 1060723  |                    | 104 |
| 1641659  | 1207245  | [1254][M+1]+       | 109 |
| 75698.15 | 345561.1 |                    | 197 |
| 264881.1 | 107085.4 | [459][M+1]+        | 114 |
| 432254.3 | 525584.4 |                    | 176 |
| 6164.155 | 544761.8 |                    | 103 |
| 154006.1 | 637398.6 |                    | 55  |
| 869937.9 | 1509021  |                    | 348 |
| 7425124  | 5258354  | [1293][M+1]+       | 143 |
| 319679.6 | 924617.6 | [133][M+2]+        | 279 |
| 11809219 | 11651472 | [1471][M]+         | 175 |
| 679035.8 | 740890.9 |                    | 43  |
| 3232716  | 2836405  |                    | 2   |
| 180123.7 | 1021275  |                    | 235 |
| 285669.3 | 834958.6 | [357][M+1]+        | 73  |
| 2766617  | 6826975  |                    | 129 |
| 21352.1  | 1593208  |                    | 356 |
| 10267034 | 12307583 | [868][M+1]+        | 143 |
| 819833   | 936811.8 |                    | 36  |
| 1959366  | 2885481  | [305][M]+          | 89  |
| 568818.8 | 358487.9 |                    | 97  |
| 1.31E+08 | 4.09E+08 | [107][M]2+         | 2   |
| 3501962  | 2838953  |                    | 116 |
| 29251621 | 45504414 | [582][M]+ [M+H+NH3 | 162 |
| 870776.5 | 651921.1 | [M+H]+ 62:         | 47  |
| 1339294  | 1500257  |                    | 304 |
| 563093.9 | 892910.8 |                    | 235 |

|          |          |                       |     |
|----------|----------|-----------------------|-----|
| 1204172  | 919162.4 |                       | 140 |
| 524560.2 | 2287855  |                       | 129 |
| 2024982  | 731276.1 | [1212][M]+ [M+Na]+ 5! | 25  |
| 88260.27 | 742446.8 | [M+K+NH3              | 49  |
| 11775904 | 10480273 | [1121][M+1]+          | 143 |
| 43816.31 | 296202.7 |                       | 97  |
| 395470.3 | 643918   | [2M+2K-H]             | 217 |
| 12235109 | 10670587 |                       | 193 |
| 329498.5 | 513943.3 | [980][M+1]+           | 11  |
| 0        | 351015.2 |                       | 348 |
| 571080.4 | 180834.9 |                       | 252 |
| 12066979 | 4976367  | [712][M]+ [M+2Na-H]   | 52  |
| 339029.1 | 112712.6 |                       | 3   |
| 4434231  | 14786803 | [1429][M+1]2+         | 11  |
| 95239.62 | 49730.08 |                       | 35  |
| 95411.56 | 133443.6 | [M+H-CO]+             | 140 |
| 377781.6 | 1068014  |                       | 368 |
| 31395703 | 38156161 | [137][M]+             | 36  |
| 16914797 | 23671866 | [384][M]+ [M+H]+ 34!  | 29  |
| 61297314 | 47238017 | [338][M]+             | 118 |
| 4215871  | 6155763  | [113][M]+             | 280 |
| 79887.29 | 6736.991 |                       | 242 |
| 318051.9 | 1715804  |                       | 198 |
| 113863.3 | 152654.1 |                       | 91  |
| 494652   | 2679228  |                       | 37  |
| 1697424  | 1710380  | [1071][M+2]+          | 297 |
| 846403.8 | 77785.96 | [1330][M+1]+          | 111 |
| 3376402  | 5179822  |                       | 55  |
| 451569.4 | 1108202  | [M+2H]2+!             | 49  |
| 270299.4 | 497171   |                       | 29  |
| 115420.2 | 84664.28 |                       | 449 |
| 384049.4 | 150268.7 | [M+2K-H]+             | 107 |
| 1223302  | 160344.9 |                       | 107 |
| 236442.6 | 5152717  |                       | 95  |
| 221462.6 | 224427.9 | [1049][M+1]+          | 29  |
| 110091.5 | 152706.3 | [M+Na]+ 5!            | 17  |
| 15467975 | 26148934 | [433][M]+ [M+H+NH3    | 151 |
| 566935.9 | 457676.2 |                       | 461 |
| 52456.67 | 68273.18 |                       | 293 |
| 699553.7 | 431450.2 | [1060][M+1]2+         | 244 |
| 2567012  | 16169796 | [331][M+1]3+          | 1   |
| 113644.3 | 1227541  | [28][M+2]+            | 133 |
| 637072.7 | 542933.6 |                       | 211 |
| 75682.79 | 88433.81 |                       | 118 |
| 358339.8 | 504898.7 | [5][M+1]+             | 258 |
| 633903.7 | 843892.5 | [M+H+HCC              | 225 |
| 1267516  | 1209144  | [1150][M+2]+          | 35  |

|          |          |                       |     |
|----------|----------|-----------------------|-----|
| 460928.4 | 256420.6 | [1283][M+1]+          | 52  |
| 1239491  | 2753524  |                       | 11  |
| 8376245  | 8372123  | [53][M]+              | 2   |
| 1418716  | 1473587  | [569][M+5]+           | 100 |
| 24739.12 | 434498.2 |                       | 104 |
| 606149.7 | 487834.4 |                       | 18  |
| 3114341  | 3710158  |                       | 335 |
| 253548.6 | 439104.3 | [1528][M]+            | 185 |
| 526166.1 | 575666   | [1099][M]+ [M+K]+ 52! | 29  |
| 2459801  | 1548510  | [1474][M+2]+          | 64  |
| 411957.1 | 468128.3 | [M+H+CF3O             | 29  |
| 2335423  | 3257995  | [272][M]+             | 114 |
| 131473.8 | 118467.3 | [641][M+1]+           | 104 |
| 167600.9 | 410816.5 | [837][M+1]2+          | 40  |
| 1733227  | 456098.6 | [M+K]+ 42!            | 172 |
| 103649.1 | 391052   |                       | 49  |
| 426492   | 641532.2 |                       | 424 |
| 268222   | 346064.2 | [M+K+NH3              | 309 |
| 15770238 | 33887091 | [695][M]+             | 196 |
| 3259593  | 2470975  | [519][M]+             | 217 |
| 570927.1 | 174323.5 |                       | 47  |
| 98231.04 | 365594.9 |                       | 19  |
| 5705157  | 6536449  | [778][M+1]+           | 2   |
| 11088009 | 71401836 |                       | 1   |
| 27677.26 | 253346.9 | [M+K]+ 32!            | 279 |
| 8639409  | 21010118 | [339][M]3+            | 1   |
| 642108.3 | 604821.7 | [650][M+1]+           | 217 |
| 751115   | 822540.8 | [579][M+2]+           | 26  |
| 942982.8 | 2515763  |                       | 364 |
| 1178251  | 4658437  | [1559][M+1]2+         | 1   |
| 480509.6 | 361200.8 | [1467][M+2]+          | 343 |
| 125821.2 | 950021.5 |                       | 124 |
| 40715702 | 46003471 | [708][M+1]+           | 2   |
| 3987112  | 4515866  |                       | 2   |
| 6872715  | 21813869 |                       | 11  |
| 4.26E+08 | 1.64E+09 | [1350][M+2]+          | 1   |
| 461521.4 | 3508652  | [2M+H+K]2             | 55  |
| 26536984 | 23863384 | [857][M]+ [M+Na]+ 4!  | 151 |
| 5895789  | 5340349  | [143][M]+ [M+H-HCO    | 79  |
| 2867951  | 447323.3 | [1330][M]+            | 111 |
| 5130367  | 21258814 | [103][M]2+            | 2   |
| 281455.9 | 833580.2 |                       | 49  |
| 1981732  | 365410.1 | [3M+H+K]2             | 55  |
| 543253.3 | 243952.2 |                       | 68  |
| 3702056  | 2935357  |                       | 256 |
| 1082295  | 752206.9 | [1205][M+2]+          | 18  |
| 110751.8 | 71831.39 | [3M+2Na]2             | 223 |

|          |          |                      |     |
|----------|----------|----------------------|-----|
| 10913774 | 8464579  | [1108][M+2]+         | 29  |
| 160599.1 | 58234.83 | [310][M+1]3+         | 62  |
| 383809.8 | 1073404  |                      | 124 |
| 977149.9 | 812190   | [231][M+1]+          | 153 |
| 64019.99 | 595198.7 |                      | 47  |
| 709372.8 | 919448.2 |                      | 18  |
| 73044.1  | 89167.87 | [1334][M+1]+         | 205 |
| 3163634  | 8564870  | [71][M]+ [M+H]+ 23!  | 279 |
| 963249   | 1050546  | [868][M+2]+          | 143 |
| 1316569  | 752114.7 | [1352][M+2]+         | 140 |
| 2274956  | 19858726 | [631][M]+ [M+H+CF3O  | 83  |
| 1898439  | 2106665  | [539][M]+            | 217 |
| 3111213  | 2593841  |                      | 2   |
| 527841.3 | 159520.7 | [837][M]2+           | 40  |
| 6491077  | 8176302  |                      | 2   |
| 2128387  | 1121492  |                      | 140 |
| 378363.6 | 508006.6 | [2M+Na+2I            | 321 |
| 4512668  | 6609449  | [253][M+2]+          | 119 |
| 1686575  | 867086.9 | [1195][M+1]2+        | 29  |
| 1727698  | 7571392  | [3M+2Na]2            | 4   |
| 303892.2 | 333618.6 |                      | 52  |
| 3.05E+08 | 72564258 | [1364][M]+           | 1   |
| 40126.09 | 303124.7 |                      | 159 |
| 505460.3 | 661928   | [704][M+1]2+         | 11  |
| 208073.5 | 134205.8 | [M+H-C3H5            | 146 |
| 142280.1 | 346625.1 |                      | 194 |
| 349990.5 | 64407.45 | [M+K+NaCl            | 60  |
| 707672.1 | 33950.37 |                      | 55  |
| 2606060  | 3533405  | [126][M+1]+          | 105 |
| 3709903  | 3612604  |                      | 1   |
| 851893.5 | 385865.2 | [M+Na]+ 5!           | 18  |
| 2041655  | 1649756  |                      | 54  |
| 219232.1 | 180603.1 | [M+H]+ 33!           | 146 |
| 619361.3 | 303305.2 | [967][M]2+           | 211 |
| 1310020  | 6562859  | [1161][M]+ [M+K+HCO  | 49  |
| 11374044 | 3293646  |                      | 1   |
| 71488.6  | 461341.6 |                      | 152 |
| 89342.33 | 98821.4  | [M+H]+ 23!           | 240 |
| 1229209  | 1811907  | [601][M]+ [M+Na]+ 3! | 162 |
| 138651.6 | 201835.2 | [M+Na+HC             | 104 |
| 119414.4 | 772422.4 |                      | 104 |
| 75157.88 | 684704.7 | [M+H]+ 41!           | 103 |
| 561138.3 | 305293.2 |                      | 87  |
| 1510286  | 1325611  |                      | 418 |
| 469583.7 | 356700   | [1430][M+3]+         | 29  |
| 83871.79 | 212326   |                      | 167 |
| 805144.1 | 862135.8 | [M+Na]+ 3!           | 158 |

|          |          |                       |     |
|----------|----------|-----------------------|-----|
| 343520.3 | 342160.2 | [M+Na]+ 2:            | 127 |
| 17771.96 | 269371.1 | [14][M+1]2+           | 178 |
| 51069.28 | 59994.34 | [827][M+1]+           | 172 |
| 400175.5 | 503241.2 | [89][M+1]+            | 326 |
| 82019.1  | 386524.2 | [M+K+CF3C             | 353 |
| 378363.4 | 956909.9 | [3M+2K]2+             | 238 |
| 1029400  | 807484.5 | [536][M]+ [M+H]+ 38:  | 205 |
| 17291479 | 1119759  | [M+K]+ 34:            | 55  |
| 3951166  | 2308443  | [927][M]+             | 329 |
| 983660.8 | 677476.8 | [M+H-HCO              | 14  |
| 610512.6 | 1170676  |                       | 11  |
| 560241   | 936446.3 | [1450][M]+            | 314 |
| 74151.11 | 478351.8 | [M+2K]2+ :            | 49  |
| 883960.9 | 147333.3 | [M+H-COCl             | 18  |
| 427828.4 | 2872823  | [M+K]+ 23:            | 172 |
| 1159658  | 916086.3 |                       | 77  |
| 1265077  | 2552101  | [625][M]+ [M+K]+ 37:  | 169 |
| 4686612  | 1989561  |                       | 23  |
| 29333.99 | 172052.3 | [M+Na]+ 3:            | 133 |
| 1647160  | 383219.8 |                       | 29  |
| 2010906  | 1119078  | [932][M]+ [M+K]+ 47:  | 261 |
| 1915810  | 1267035  | [581][M+1]+           | 267 |
| 1932153  | 104536.3 | [M+H-CH2]             | 104 |
| 266025.9 | 253664.3 | [M+K+HCO              | 11  |
| 2819839  | 4940016  | [926][M+2]+           | 2   |
| 263727.6 | 144786.2 | [479][M+1]+           | 139 |
| 13039096 | 20870054 | [149][M]2+ [M+2K]2+ : | 60  |
| 1305783  | 420718.7 | [M+K]+ 33:            | 121 |
| 174315.2 | 210503.2 | [98][M+2]+            | 105 |
| 650691.7 | 279024.2 | [M+H]+ 68:            | 29  |
| 1013125  | 748508.7 |                       | 447 |
| 198342.3 | 90365.11 |                       | 279 |
| 749443.2 | 741951.8 |                       | 266 |
| 384342.1 | 446470.4 | [M+K]+ 67:            | 119 |
| 1679664  | 8846562  | [991][M]+             | 161 |
| 2117318  | 2519842  | [M+Na]+ 3:            | 40  |
| 585920.1 | 454250.5 |                       | 473 |
| 980747.7 | 1506528  |                       | 79  |
| 475493.3 | 68915.78 |                       | 40  |
| 1076386  | 1609235  |                       | 28  |
| 17752933 | 1.51E+08 |                       | 1   |
| 57747.37 | 490569.8 | [M+Na]+ 3:            | 96  |
| 730911.6 | 2416042  |                       | 304 |
| 548814.8 | 4717758  | [285][M+1]+           | 172 |
| 5223814  | 13734787 | [6][M]+ [M+H-C6H:     | 279 |
| 11713994 | 1.39E+08 |                       | 1   |
| 882142.8 | 1266269  | [M+K]+ 12:            | 78  |



|          |          |                       |     |
|----------|----------|-----------------------|-----|
| 1043423  | 1143871  | [M+K]+ 236            | 110 |
| 116460.1 | 199917.6 |                       | 116 |
| 6184978  | 4032594  |                       | 168 |
| 337086.2 | 518908.2 | [773][M+2]+           | 276 |
| 364741.3 | 225974.9 |                       | 200 |
| 429520   | 2.09E+08 | [26][M]+              | 4   |
| 343755.2 | 184475.8 | [1424][M+3]+          | 100 |
| 404304.8 | 301718.1 | [767][M+1]+           | 116 |
| 24608747 | 23069658 | [147][M+1]+           | 66  |
| 309751.8 | 375900.1 |                       | 412 |
| 147392.6 | 247677.3 |                       | 103 |
| 10046984 | 7558151  | [1208][M+1]+          | 143 |
| 1208733  | 2755034  | [1488][M+3]+          | 11  |
| 66973.94 | 435379.9 |                       | 97  |
| 107627.4 | 330183.7 | [M+H-C6H:             | 88  |
| 199000.6 | 101739.7 |                       | 56  |
| 94159.89 | 232830.5 | [51][M+1]2+           | 169 |
| 351455.2 | 11188071 |                       | 71  |
| 794114.2 | 984310.6 | [M+K+NaCl             | 254 |
| 4837976  | 3805288  | [1254][M]+ [M+Na]+ 6: | 109 |
| 583976.8 | 640318.2 | [19][M+1]+            | 172 |
| 108264.5 | 188066.6 | [M+K]+ 42:            | 143 |
| 29074.38 | 506462.2 | [M+H]+ 27:            | 83  |
| 273361.8 | 2819177  |                       | 115 |
| 9135.016 | 130350.3 |                       | 176 |
| 1210938  | 667887   | [1176][M+2]+          | 29  |
| 226112.2 | 95221.27 | [1146][M+2]+          | 29  |
| 25741.48 | 6790.134 |                       | 198 |
| 263573.8 | 230846.6 |                       | 27  |
| 50756383 | 51888686 |                       | 2   |
| 3719372  | 6160439  | [752][M]+ [M+Na]+ 4:  | 169 |
| 190282.3 | 94265.41 | [70][M+1]+            | 116 |
| 25385095 | 25542290 | [778][M]+             | 2   |
| 32476020 | 46965781 | [920][M]+ [M+Na]+ 4:  | 137 |
| 383474.8 | 1879146  | [285][M+2]+           | 172 |
| 7132809  | 9884233  | [727][M+1]+           | 143 |
| 180308   | 2310414  | [M+H]+ 47:            | 95  |
| 587487.9 | 909106.4 |                       | 199 |
| 2533963  | 3084026  | [135][M]+ [M+Na+Na    | 103 |
| 813666.5 | 1662106  |                       | 2   |
| 69262.74 | 394346.9 | [779][M+2]+           | 235 |
| 238885.3 | 179909.8 |                       | 19  |
| 638437.3 | 129916.6 | [M+K+NaCl             | 47  |
| 345425.6 | 304210.2 | [M+H-CO]+             | 52  |
| 741028   | 763173.6 | [143][M+1]+           | 79  |
| 6024.065 | 2045434  |                       | 199 |
| 356665.1 | 490465.9 |                       | 352 |

|          |          |              |     |
|----------|----------|--------------|-----|
| 1237416  | 580141.4 | [1261][M]+   | 104 |
| 1265281  | 1969564  |              | 41  |
| 291800.1 | 551959.1 | [M+H-H2O]    | 381 |
| 1079476  | 168446.8 | [M+Na]+ 5:   | 88  |
| 836355.9 | 593705.3 | [M+3Na+K-    | 284 |
| 2467864  | 3038980  | [M+H-CH4]    | 60  |
| 2598138  | 6778911  |              | 50  |
| 94551.96 | 559931.2 | [8][M+1]2+   | 83  |
| 0        | 918846.8 | [M+H]+ 45:   | 209 |
| 404916.3 | 510269.3 | [M+Na]+ 2:   | 26  |
| 135198.5 | 75387.5  |              | 29  |
| 17980260 | 7612775  | [40][M]+     | 217 |
| 1360509  | 1708643  | [248][M+1]+  | 292 |
| 441914.3 | 121219.3 |              | 319 |
| 516603.3 | 545627.7 | [559][M+1]3+ | 62  |
| 254148.5 | 684928.4 | [M+K]+ 50:   | 49  |
| 176383.1 | 108506.1 |              | 365 |
| 162808.2 | 179663.1 | [2][M+1]+    | 41  |
| 205490.3 | 221809.5 |              | 156 |
| 857533.5 | 408342.3 |              | 18  |
| 235032   | 723201   | [M+H+CF3(    | 218 |
| 8962482  | 11472420 | [317][M]+    | 325 |
| 200766.3 | 361606.4 | [M+H]+ 65:   | 116 |
| 9518853  | 1.3E+08  |              | 1   |
| 148123.2 | 823133.5 |              | 374 |
| 1332383  | 2016091  | [249][M]+    | 27  |
| 364331.7 | 102938.2 |              | 29  |
| 314185.5 | 937792.6 |              | 11  |
| 219990.7 | 396872.1 |              | 442 |
| 577982.8 | 212776.7 |              | 377 |
| 106795.3 | 1916782  | [M+H]+ 66:   | 95  |
| 130788.4 | 473609.4 | [M+H-NH3]    | 104 |
| 4479290  | 4758418  |              | 2   |
| 201111.1 | 577212.6 |              | 133 |
| 100906.2 | 101845.2 | [737][M+1]+  | 35  |
| 830369.5 | 1196344  |              | 10  |
| 1258764  | 612372.3 | [M+H-C4H8    | 33  |
| 95697.9  | 1282984  |              | 133 |
| 456336.3 | 314235.9 |              | 71  |
| 1204089  | 4968585  | [560][M+2]+  | 110 |
| 2029330  | 3794797  |              | 289 |
| 61189.03 | 166237.2 |              | 348 |
| 13817842 | 17162563 | [579][M+1]+  | 26  |
| 1390235  | 1120517  | [1208][M+2]+ | 143 |
| 5651.581 | 438830.9 |              | 178 |
| 19838481 | 22579315 | [794][M]+    | 151 |
| 1741960  | 694770.8 |              | 149 |

|          |          |                       |     |
|----------|----------|-----------------------|-----|
| 39271030 | 60596551 | [194][M]+             | 114 |
| 30699304 | 40659754 | [1420][M+1]+          | 11  |
| 218870.3 | 164157.5 |                       | 301 |
| 145147.7 | 93486.53 | [M+H]+ 42:            | 119 |
| 502239   | 488421.4 |                       | 364 |
| 310165.9 | 924635.4 | [M+H-C2H4             | 90  |
| 83673.45 | 2203047  | [1088][M+2]+          | 55  |
| 346665.7 | 390027.6 | [M+H+HCC              | 205 |
| 51656.33 | 82131.51 |                       | 288 |
| 299038.4 | 1575958  | [560][M+4]+           | 110 |
| 489678.9 | 298746   | [M+H]+ 82:            | 25  |
| 3855592  | 1758623  |                       | 293 |
| 384475.1 | 740445.7 |                       | 420 |
| 1275320  | 1624202  |                       | 38  |
| 340599.3 | 645796.9 |                       | 41  |
| 526914.8 | 449047.5 |                       | 279 |
| 270189.1 | 63551.68 | [4][M+1]+             | 217 |
| 471723.5 | 536214.2 |                       | 309 |
| 100798.9 | 108337.9 |                       | 91  |
| 174958.2 | 230445.2 | [741][M+1]+           | 425 |
| 451381.1 | 309207.8 | [1024][M+2]+          | 242 |
| 118433.9 | 28966.35 |                       | 389 |
| 1.22E+09 | 1.69E+09 | [835][M+1]+           | 2   |
| 911119.2 | 546447.7 |                       | 71  |
| 860861.7 | 8519090  |                       | 63  |
| 46866855 | 34569666 | [1437][M]+            | 45  |
| 328999.6 | 5564946  |                       | 199 |
| 219682.9 | 266091.4 | [549][M+5]+           | 17  |
| 2280077  | 2177722  | [1015][M]+ [M+Na]+ 5: | 116 |
| 493936.8 | 3841973  |                       | 384 |
| 81041.83 | 256176.5 | [M+Na]+ 3:            | 86  |
| 264262   | 1481241  |                       | 97  |
| 150119.5 | 83686.77 |                       | 188 |
| 594506.9 | 652697.5 |                       | 354 |
| 1825747  | 2978603  |                       | 46  |
| 366979.6 | 231471.5 |                       | 283 |
| 824467.5 | 1186820  | [M+H-H2O]             | 237 |
| 427505   | 389121   | [M+H]+ 40:            | 209 |
| 286108.4 | 277902   |                       | 275 |
| 213697.2 | 200321.6 |                       | 377 |
| 455620.8 | 1226962  |                       | 147 |
| 1329136  | 638249.7 |                       | 282 |
| 3081855  | 4831181  | [828][M+1]2+          | 2   |
| 340071.2 | 221845.2 | [2M+Na+K-             | 319 |
| 166954.1 | 116003.6 | [2M+2Na+I             | 49  |
| 146031.2 | 249074.9 | [M+Na+HC              | 119 |
| 1192333  | 2507850  | [647][M]+             | 137 |

|          |          |                      |     |
|----------|----------|----------------------|-----|
| 147023.3 | 3027120  | [681][M+1]+          | 55  |
| 713177.4 | 440853.5 |                      | 200 |
| 5703629  | 9149623  | [582][M+1]+          | 162 |
| 692542.8 | 1033598  |                      | 94  |
| 453812.5 | 144962.9 | [328][M+1]+          | 292 |
| 13008142 | 11096262 | [191][M]+ [M+H+NH3   | 66  |
| 1566243  | 2245458  |                      | 37  |
| 2871500  | 18185957 | [82][M+1]+           | 55  |
| 137095.6 | 140282.7 |                      | 109 |
| 21097717 | 17409854 | [1117][M]+           | 321 |
| 64545.13 | 160930.5 | [M+2H-CO]            | 116 |
| 691218   | 603473.6 |                      | 168 |
| 3681542  | 3044126  | [1382][M+1]+         | 146 |
| 1553740  | 1478571  |                      | 129 |
| 419515.7 | 416008.6 | [80][M+1]+           | 172 |
| 1783665  | 2259997  |                      | 16  |
| 6037506  | 5954833  | [1338][M]+ [M+Na]+ 6 | 60  |
| 4.85E+08 | 984841.7 |                      | 20  |
| 1811700  | 2010767  | [457][M]+ [M+K]+ 32  | 230 |
| 229787.4 | 100348.6 |                      | 312 |
| 54213.12 | 723311   |                      | 288 |
| 133043.4 | 227896.1 | [1368][M+3]+         | 205 |
| 56093.81 | 181668.5 |                      | 224 |
| 154309.3 | 250216.3 | [1080][M+1]+         | 217 |
| 1577355  | 1208069  |                      | 391 |
| 11820190 | 2326944  | [853][M+3]+          | 2   |
| 300817.7 | 885434.1 |                      | 348 |
| 259093.5 | 3332573  |                      | 110 |
| 1105556  | 1539151  | [M+Na]+ 3            | 151 |
| 2996317  | 55655895 | [674][M]2+           | 4   |
| 0        | 9121404  |                      | 311 |
| 20005564 | 30505441 | [796][M]+            | 142 |
| 862744.6 | 931703   |                      | 250 |
| 1987535  | 555433.5 | [40][M+1]+           | 217 |
| 782355.7 | 621414.4 |                      | 280 |
| 3400157  | 3398072  |                      | 2   |
| 114065.4 | 150712.1 | [112][M+1]+          | 86  |
| 372601.8 | 259811   | [967][M+1]2+         | 211 |
| 318962   | 324272.1 |                      | 158 |
| 1.51E+08 | 1.68E+08 |                      | 23  |
| 14120378 | 13308903 |                      | 245 |
| 297159.9 | 553381.2 |                      | 199 |
| 177177.1 | 181291.5 | [2M+2Na-t            | 264 |
| 1499802  | 849396.7 | [1081][M]+           | 113 |
| 662608.3 | 452958.1 | [M+2H-NH             | 260 |
| 592781.4 | 458501.9 |                      | 256 |
| 277692.5 | 209685.5 |                      | 61  |

|          |          |                       |     |
|----------|----------|-----------------------|-----|
| 7767616  | 6571245  | [1114][M+2]+          | 47  |
| 297845.5 | 272715.8 | [M+Na]+ 4!            | 143 |
| 1518107  | 1738697  | [741][M]+             | 425 |
| 852211.9 | 684988.1 | [M+H-C3H:             | 137 |
| 3012022  | 7207540  | [695][M+1]+           | 196 |
| 44569.37 | 832170.1 | [2M+Na+2!             | 4   |
| 1008929  | 930030.9 | [1049][M]+            | 29  |
| 186637   | 930908.3 |                       | 163 |
| 300961.4 | 251597.6 | [876][M+2]+           | 75  |
| 29531365 | 41926296 | [351][M]+ [M+H]+ 33!  | 151 |
| 5637444  | 29241141 |                       | 1   |
| 507834.6 | 216133.7 | [M+K+NaCl             | 29  |
| 7840.526 | 628054.1 |                       | 356 |
| 3812908  | 3770130  |                       | 84  |
| 446037.9 | 400814.2 | [3M+2Na+!             | 34  |
| 474315.9 | 1330148  |                       | 136 |
| 1136093  | 731550.1 | [333][M+2]+           | 49  |
| 2298920  | 9320216  |                       | 1   |
| 1427607  | 1153403  | [448][M+1]+           | 217 |
| 613727.5 | 795371.7 |                       | 19  |
| 680226.6 | 749364   | [M+Na]+ 4:            | 277 |
| 86656.03 | 112033.8 | [1268][M+1]+          | 34  |
| 144241.5 | 5197324  |                       | 1   |
| 149736.4 | 68354.67 | [M+Na]+ 4:            | 107 |
| 1208825  | 2701657  | [75][M]+              | 319 |
| 3750826  | 1350224  | [617][M]2+ [M+H+Na]:  | 243 |
| 34985144 | 1.49E+08 | [164][M]+ [M+H+HCC    | 55  |
| 1021876  | 3.49E+08 | [M+H]+ 30!            | 27  |
| 162522.1 | 484786.6 |                       | 129 |
| 36039461 | 35841076 | [148][M]+ [M+H]+ 27:  | 156 |
| 3494689  | 3217795  | [850][M]+             | 236 |
| 139090.5 | 272020.1 |                       | 43  |
| 17373446 | 20122497 | [670][M]+ [M+H]+ 42:  | 143 |
| 759116.3 | 2649918  | [729][M+2]+           | 49  |
| 265266.7 | 319561.7 | [609][M+1]+           | 134 |
| 363704.6 | 462663.8 |                       | 288 |
| 5937362  | 2958231  |                       | 179 |
| 21832777 | 86354483 | [1488][M]+ [M+K+HCO   | 11  |
| 59962.35 | 85267.87 |                       | 197 |
| 1179605  | 1327991  | [1406][M]+ [M+Na]+ 7: | 138 |
| 264613.2 | 112503.1 | [1487][M+2]+          | 325 |
| 623114.3 | 544961.5 | [984][M]+ [M+K]+ 48!  | 263 |
| 753049.6 | 1074355  | [920][M+2]+           | 137 |
| 113945   | 86244.35 |                       | 309 |
| 70402.02 | 659709.1 | [678][M+1]+           | 124 |
| 528175.4 | 3018815  | [M+K+HCO              | 55  |
| 147823.8 | 179852.7 |                       | 89  |

|          |          |                       |     |
|----------|----------|-----------------------|-----|
| 3.67E+08 | 4.96E+08 | [244][M]+ [M+H]+ 30!  | 27  |
| 2802624  | 3774637  |                       | 154 |
| 544485.3 | 1671619  | [106][M+4]+           | 49  |
| 1268915  | 1447747  |                       | 127 |
| 12595610 | 1.42E+08 |                       | 1   |
| 5213377  | 3005188  |                       | 2   |
| 52725.16 | 120766.8 | [M+K]+ 19!            | 217 |
| 3.84E+08 | 3.32E+08 | [1041][M]+ [M+Na]+ 5! | 29  |
| 1738454  | 8811907  |                       | 1   |
| 745089.2 | 3293663  |                       | 358 |
| 2294086  | 2549344  | [1071][M+1]+          | 297 |
| 6372623  | 25204675 | [1325][M+1]+          | 1   |
| 853780.6 | 451970.8 |                       | 81  |
| 78323.07 | 1952314  |                       | 55  |
| 559092.7 | 640954.2 | [174][M+1]+           | 221 |
| 329649.3 | 202247.9 | [M+Na+K+!             | 29  |
| 1915988  | 265948.3 | [1371][M]+            | 217 |
| 6404167  | 7982480  | [1420][M+2]+          | 11  |
| 1359993  | 9493751  | [1158][M]+            | 299 |
| 33334.76 | 169101.6 |                       | 149 |
| 266281.7 | 167518.6 | [1230][M+4]+          | 10  |
| 176731.2 | 753624.6 |                       | 194 |
| 1906495  | 1190283  |                       | 236 |
| 1788564  | 2231032  | [M+H]+ 38!            | 108 |
| 37178.44 | 840255   |                       | 171 |
| 28383919 | 71822939 | [107][M+1]2+          | 2   |
| 1687506  | 7278785  | [472][M+1]2+          | 1   |
| 476476   | 326792.1 |                       | 300 |
| 749914.4 | 6675447  | [284][M+1]+           | 97  |
| 288504.9 | 881024.4 | [M+K]+ 36!            | 4   |
| 76085.96 | 636536.8 |                       | 207 |
| 1681576  | 1362444  | [943][M+1]+           | 143 |
| 148768   | 884478.2 | [3M+3K-H]             | 49  |
| 1331440  | 644435.6 |                       | 372 |
| 5178601  | 6779341  | [M+H]+ 27!            | 17  |
| 4552748  | 47816932 |                       | 126 |
| 151042.1 | 131717.3 |                       | 202 |
| 519361.3 | 1023832  | [M+Na]+ 5!            | 49  |
| 651741.4 | 758937.8 | [M+Na+NH              | 75  |
| 217788.7 | 287405.5 |                       | 108 |
| 219674.3 | 119476.2 | [1419][M+1]2+         | 249 |
| 332828   | 291948.3 | [M+Na]+ 5!            | 86  |
| 0        | 42166.69 | [M+H+Na]!             | 178 |
| 3564825  | 3274068  |                       | 385 |
| 268245   | 287729.9 |                       | 175 |
| 24397600 | 16533087 | [1120][M]+ [M+Na]+ 5! | 118 |
| 1158915  | 229651   | [783][M+2]2+          | 66  |

|          |          |                                               |     |
|----------|----------|-----------------------------------------------|-----|
| 1051806  | 1152640  |                                               | 158 |
| 61076.05 | 1045810  | [M+H] <sup>+</sup> 45!                        | 172 |
| 179813   | 222441.2 |                                               | 88  |
| 332796.7 | 205488   | [1519][M+2] <sup>+</sup>                      | 200 |
| 1477821  | 2012947  |                                               | 159 |
| 120255.7 | 246400.2 |                                               | 177 |
| 123091.6 | 154100.2 | [1528][M+1] <sup>+</sup>                      | 185 |
| 61437320 | 1.18E+08 | [438][M] <sup>+</sup> [M+H+NH <sub>3</sub> ]  | 78  |
| 630845.5 | 571451   | [M+Na] <sup>+</sup> 2!                        | 100 |
| 381291   | 145380.3 |                                               | 62  |
| 1722500  | 22664003 | [1177][M] <sup>+</sup> [M+Na] <sup>+</sup> 5' | 95  |
| 231475.6 | 287990.5 | [1028][M+1] <sup>+</sup>                      | 29  |
| 23999039 | 98970047 | [1374][M+1] <sup>+</sup>                      | 1   |
| 2386437  | 10509904 | [1482][M] <sup>+</sup> [M+K] <sup>+</sup> 77! | 11  |
| 10135630 | 25641143 |                                               | 2   |
| 394703.4 | 614116.9 |                                               | 10  |
| 541968.3 | 1256503  |                                               | 331 |
| 367503.4 | 1086635  | [851][M+1] <sup>+</sup>                       | 62  |
| 942390.5 | 1168093  | [M+H+NH <sub>3</sub> ]                        | 218 |
| 628556.9 | 1173367  | [M+H] <sup>+</sup> 21!                        | 88  |
| 272977.2 | 2716845  |                                               | 11  |
| 413021.7 | 691168.7 | [113][M+1] <sup>+</sup>                       | 280 |
| 23118404 | 21256753 | [749][M] <sup>+</sup>                         | 2   |
| 861097.3 | 292761.9 | [651][M+2] <sup>2+</sup>                      | 18  |
| 14516901 | 2691743  |                                               | 13  |
| 12142882 | 12036550 | [807][M] <sup>+</sup> [M+H] <sup>+</sup> 46!  | 143 |
| 196297.9 | 90779.81 |                                               | 200 |
| 290594.7 | 841720.4 | [M+Na] <sup>+</sup> 3!                        | 49  |
| 522541.6 | 771574.9 |                                               | 27  |
| 2566166  | 2951090  |                                               | 78  |
| 586517.7 | 470899.5 | [834][M+1] <sup>3+</sup>                      | 282 |
| 443519   | 844443   | [215][M+1] <sup>+</sup>                       | 138 |
| 2693684  | 347984.5 | [M+K+NH <sub>3</sub> ]                        | 121 |
| 38001.75 | 602199.1 | [M+H-CH <sub>4</sub> ]                        | 95  |
| 215573.8 | 529312.9 |                                               | 26  |
| 3438145  | 3915494  | [670][M+1] <sup>+</sup>                       | 143 |
| 1797385  | 1087955  | [508][M] <sup>+</sup> [M+2K-H] <sup>+</sup>   | 134 |
| 62355.4  | 519856.3 |                                               | 224 |
| 751949.5 | 671667.2 |                                               | 143 |
| 75600642 | 1.03E+08 | [244][M+1] <sup>+</sup>                       | 27  |
| 80204.28 | 499497   | [815][M+1] <sup>+</sup>                       | 182 |
| 447303.2 | 379808.6 | [166][M+1] <sup>+</sup>                       | 52  |
| 1036377  | 994420.5 | [1031][M+2] <sup>+</sup>                      | 138 |
| 1405204  | 420546   | [1147][M+1] <sup>+</sup>                      | 29  |
| 79201.21 | 650485   | [M+H-C <sub>2</sub> H <sub>4</sub> ]          | 178 |
| 2441823  | 2581986  |                                               | 49  |
| 962137.1 | 542172.9 | [1357][M+2] <sup>+</sup>                      | 143 |

|          |          |                      |     |
|----------|----------|----------------------|-----|
| 1079059  | 928036.9 |                      | 140 |
| 8812792  | 5002092  | [792][M]+            | 329 |
| 1573938  | 1436816  | [255][M+1]+          | 214 |
| 236067   | 2257501  |                      | 356 |
| 214613.4 | 327268.9 | [M+Na]+ 3:           | 381 |
| 165866.7 | 748604.9 | [M+H-C3H:            | 55  |
| 269978.4 | 1293169  | [934][M+1]+          | 49  |
| 1034552  | 917539.7 | [2M+Na+K]            | 146 |
| 3208092  | 9844468  | [120][M]+ [M+K]+ 22: | 254 |
| 885113.8 | 710765.4 | [369][M+1]+          | 134 |
| 3789058  | 9113349  |                      | 27  |
| 515964.4 | 1931779  | [M+K]+ 28(           | 88  |
| 1065400  | 1151146  |                      | 176 |
| 1366374  | 2713567  |                      | 178 |
| 2786200  | 1532868  |                      | 3   |
| 422252.8 | 82143.65 | [1044][M+1]+         | 206 |
| 347393.7 | 295124.6 |                      | 114 |
| 70611.79 | 350751   |                      | 159 |
| 1079360  | 1091679  | [1133][M+2]+         | 75  |
| 429422   | 372686.6 |                      | 60  |
| 377701.4 | 316266.3 |                      | 297 |
| 789748.4 | 758606   |                      | 218 |
| 1457761  | 11023299 | [444][M]+            | 83  |
| 142936.1 | 68777.21 | [949][M+1]+          | 343 |
| 3700065  | 2959499  | [894][M+2]+          | 60  |
| 1473455  | 2242874  | [3M+2H]2+            | 49  |
| 98571.1  | 138904.4 | [M+Na+K-t            | 52  |
| 6.11E+08 | 1852145  | [M+Na]+ 3:           | 11  |
| 941519.5 | 4378463  | [107][M+5]2+         | 2   |
| 641796.5 | 519954.9 | [M+K]+ 36:           | 4   |
| 368068.6 | 1017043  | [1488][M+5]+         | 11  |
| 637379.1 | 485337.7 | [222][M+2]+          | 95  |
| 1233973  | 7059744  | [157][M]+ [M+H+NH3   | 55  |
| 3005455  | 4221967  | [1192][M]+           | 2   |
| 2026820  | 679344.9 | [587][M+1]2+         | 243 |
| 268086.8 | 1276502  | [M+Na]+ 3:           | 55  |
| 481537.1 | 817282   |                      | 181 |
| 141921.8 | 431990.4 | [M+3H-CO(            | 83  |
| 223287.7 | 1651137  |                      | 374 |
| 1624566  | 5781617  | [106][M+2]+          | 49  |
| 441365.7 | 2756000  | [284][M+2]+          | 97  |
| 1239934  | 2431670  | [67][M]+ [M+K]+ 19:  | 221 |
| 231615   | 1922325  | [314][M]+ [M+H]+ 32: | 103 |
| 176011.1 | 226511.5 |                      | 113 |
| 199669   | 627176.8 | [206][M+5]+          | 49  |
| 254723.2 | 1379962  | [M+2K-H]+            | 11  |
| 915431.1 | 1356088  | [M+H]+ 29:           | 288 |



|          |          |              |           |     |
|----------|----------|--------------|-----------|-----|
| 11901509 | 47436558 | [633][M]+    | [M+H-COCl | 79  |
| 213584.9 | 345829.5 |              |           | 133 |
| 671915.2 | 1123044  | [1022][M+1]+ |           | 119 |
| 106631.5 | 171861.1 |              |           | 41  |
| 299321.7 | 1143723  |              |           | 49  |
| 65782931 | 79236950 | [579][M]+    | [M+H+NH3  | 26  |
| 157180   | 385853.3 |              |           | 362 |
| 2897747  | 1402447  | [651][M]2+   | [M+2K]2+  | 18  |
| 2092207  | 15089161 | [416][M]2+   |           | 1   |
| 4720255  | 1441595  | [1146][M]+   | [M+K]+ 54 | 29  |
| 290677.6 | 438776.6 | [533][M+1]+  |           | 19  |
| 395197.2 | 66404.94 |              |           | 165 |
| 686724.2 | 4060476  |              | [3M+Na+K] | 117 |
| 6494525  | 25757186 |              |           | 38  |
| 919100.3 | 1804590  |              |           | 129 |
| 321226.5 | 92684.75 | [1496][M+1]+ |           | 320 |
| 107606.6 | 332639.4 |              |           | 231 |
| 108337.1 | 263914.3 |              |           | 26  |
| 40054.66 | 140144.5 |              |           | 70  |
| 46893652 | 2.08E+08 | [924][M]+    | [M+H+HCC  | 11  |
| 503970.1 | 175969.2 |              | [M+H]+ 43 | 33  |
| 1711281  | 802357   |              |           | 324 |
| 3322759  | 5687236  |              |           | 290 |
| 1753345  | 1766761  |              | [M+K]+ 17 | 49  |
| 447891.5 | 524574.8 |              |           | 177 |
| 4868959  | 3706033  | [974][M+2]+  |           | 29  |
| 601492.3 | 897295.1 | [1391][M]+   |           | 314 |
| 676791   | 940948.3 |              | [M+H]+ 38 | 107 |
| 16138.06 | 2015653  | [1435][M]+   |           | 55  |
| 2708700  | 11847177 |              |           | 4   |
| 6217854  | 9404812  | [194][M+1]+  |           | 114 |
| 241141.4 | 8902.175 |              |           | 87  |
| 143589.7 | 648526.9 |              |           | 209 |
| 21512043 | 80844538 | [763][M]+    |           | 95  |
| 911089.1 | 11185235 |              |           | 195 |
| 174841   | 190709.1 |              |           | 26  |
| 3075363  | 4043312  |              | [M+H-CO]+ | 116 |
| 493136.9 | 565104.4 | [164][M+5]+  |           | 55  |
| 232853.5 | 65352.41 |              | [M+Na]+ 7 | 29  |
| 736546.4 | 1133485  | [805][M]+    | [M+K]+ 42 | 116 |
| 18572595 | 12861421 | [1437][M+1]+ |           | 45  |
| 1118710  | 1718679  |              |           | 12  |
| 168113.8 | 180465.9 |              |           | 159 |
| 286147.9 | 423704.4 | [1562][M+1]+ |           | 143 |
| 2199422  | 2566579  | [522][M]+    | [M+H-C4H  | 159 |
| 561289.8 | 486893.6 |              | [M+H]+ 50 | 116 |
| 396388.8 | 866978.3 |              |           | 11  |

|          |          |                      |     |
|----------|----------|----------------------|-----|
| 1.9E+09  | 2.68E+09 | [668][M]+ [M+Na]+ 4! | 4   |
| 197998.8 | 133171.7 | [724][M+1]2+         | 17  |
| 7345567  | 8970528  | [19][M]+ [M+H-H2O]   | 172 |
| 469621.2 | 780554.9 |                      | 12  |
| 279074.8 | 208837.4 | [1474][M+3]+         | 64  |
| 160459.5 | 382914.6 |                      | 82  |
| 52583456 | 45310879 | [1234][M]+ [M+K+NH3  | 134 |
| 11087045 | 13725534 | [766][M]+ [M+H+NH3   | 159 |
| 69503.35 | 157965.5 | [684][M+1]+          | 245 |
| 10777972 | 20784182 | [438][M+1]+          | 78  |
| 56715169 | 45893961 | [1372][M]+           | 48  |
| 13935.23 | 335078   |                      | 110 |
| 754531.2 | 1193243  | [M+Na]+ 6!           | 232 |
| 832911.6 | 901290   | [1248][M+2]+         | 34  |
| 75328.4  | 265629.8 |                      | 169 |
| 241817.9 | 339434.7 | [454][M+1]+          | 78  |
| 240773.7 | 361006.2 | [1033][M+1]+         | 169 |
| 878027.7 | 2101262  |                      | 409 |
| 5455606  | 6697995  | [49][M]+             | 27  |
| 1425125  | 1931639  | [1140][M]+           | 119 |
| 248826.6 | 96811.13 | [M+H]+ 75!           | 34  |
| 10245139 | 9032076  | [1][M]+              | 66  |
| 771840.9 | 1361001  |                      | 274 |
| 484076.4 | 333657.8 | [M+3H-CH4            | 275 |
| 629999.6 | 555399.7 |                      | 77  |
| 148585   | 912624.5 |                      | 124 |
| 206720.3 | 167504.2 | [83][M+1]+           | 118 |
| 493236.5 | 714505.4 | [1132][M]+           | 352 |
| 4034047  | 13014489 |                      | 2   |
| 576816.5 | 550826.6 | [519][M+1]+          | 217 |
| 202852.3 | 107492.4 | [960][M+1]+          | 280 |
| 317300   | 144455.3 | [1168][M+1]+         | 61  |
| 391120.7 | 825647.5 |                      | 133 |
| 62071059 | 51697601 | [1305][M]+           | 81  |
| 1137023  | 113957.3 |                      | 55  |
| 834748.7 | 2162754  | [206][M+3]+          | 49  |
| 1995186  | 1383968  | [993][M]+            | 18  |
| 5261010  | 8092266  | [796][M+1]+          | 142 |
| 2969772  | 2723875  |                      | 2   |
| 504769.2 | 3742185  | [165][M+2]+          | 199 |
| 1.08E+08 | 90582518 | [M+K+NaCl            | 29  |
| 198569.6 | 315289.4 | [695][M+2]+          | 196 |
| 125277.6 | 190222.7 |                      | 57  |
| 41829593 | 1.12E+08 | [475][M+4]+          | 1   |
| 190190.7 | 0        | [532][M+1]+          | 366 |
| 476767.5 | 208136.3 |                      | 327 |
| 322855.3 | 237628.7 | [M+H-C4H8            | 391 |

|          |          |                       |     |
|----------|----------|-----------------------|-----|
| 70876.79 | 873903.3 |                       | 97  |
| 898916.9 | 1320090  | [865][M]+             | 96  |
| 1790718  | 4028811  |                       | 69  |
| 314662.4 | 1186792  | [1349][M+1]+          | 49  |
| 227690.2 | 646106.5 | [M+H-CO2]             | 90  |
| 743231.7 | 1032651  |                       | 246 |
| 19517162 | 1978201  | [220][M]+             | 55  |
| 89575.55 | 522981.9 |                       | 49  |
| 125022.6 | 901957.3 |                       | 97  |
| 19299751 | 18619001 | [352][M]+             | 2   |
| 81899.9  | 45066.23 |                       | 251 |
| 372829.6 | 142855   | [217][M+1]+           | 289 |
| 2693995  | 2177349  |                       | 146 |
| 8782014  | 7121055  | [1382][M]+ [2M+2Na+]  | 146 |
| 349211.2 | 481089.8 | [322][M+1]+           | 116 |
| 1.72E+08 | 2.08E+08 | [708][M]+             | 2   |
| 23482.77 | 159880.2 | [M+Na]+ 6!            | 55  |
| 7822471  | 5378793  |                       | 29  |
| 338852.4 | 265800   | [438][M+2]+           | 78  |
| 274162.7 | 561030.2 | [994][M+2]+           | 138 |
| 815638.5 | 1131783  | [588][M]+ [M+K]+ 35!  | 116 |
| 1930621  | 1357367  | [981][M+3]+           | 18  |
| 3502898  | 5352548  | [1022][M]+            | 119 |
| 87797.86 | 103977.4 |                       | 288 |
| 1116146  | 427872.3 | [1154][M+1]2+         | 29  |
| 3173200  | 2779191  |                       | 112 |
| 1171078  | 1241416  |                       | 413 |
| 7956506  | 11949964 | [920][M+1]+           | 137 |
| 2977916  | 673788.4 | [1425][M+1]+          | 198 |
| 14110528 | 10933878 | [338][M+1]+           | 118 |
| 744761.7 | 6049570  |                       | 1   |
| 483068   | 157659.8 |                       | 170 |
| 5182354  | 5057389  | [1253][M]+ [M+Na]+ 6! | 73  |
| 14205118 | 10568565 | [185][M]+             | 240 |
| 1807109  | 2683358  | [531][M]+             | 71  |
| 942508.8 | 132691.6 |                       | 324 |
| 603959.5 | 1377664  |                       | 124 |
| 21687369 | 28562618 | [517][M]+ [M+H]+ 37!  | 162 |
| 665318.7 | 907500.5 | [M+K]+ 38!            | 178 |
| 1559306  | 1069488  | [205][M+1]3+          | 62  |
| 10772475 | 33779850 | [1429][M]2+           | 11  |
| 1696460  | 2311194  | [1098][M]+ [M+H+NH3]  | 13  |
| 336992.5 | 5890386  |                       | 63  |
| 24504.44 | 408961.7 | [1066][M+1]+          | 83  |
| 208872.9 | 593723   |                       | 348 |
| 646637.8 | 628244.7 | [M+Na+HC              | 11  |
| 896005.3 | 1914433  | [1108][M+3]+          | 29  |

|          |          |                                               |     |
|----------|----------|-----------------------------------------------|-----|
| 1493089  | 12533091 | [3M+2Na] <sup>2</sup>                         | 144 |
| 534678.2 | 1686644  |                                               | 117 |
| 2783235  | 8667806  | [206][M+4] <sup>+</sup>                       | 49  |
| 19175231 | 66960020 |                                               | 11  |
| 2246088  | 1519174  | [479][M] <sup>+</sup>                         | 139 |
| 229516.2 | 116666.4 |                                               | 150 |
| 21069131 | 16554702 | [1372][M+1] <sup>+</sup>                      | 48  |
| 8567909  | 7962695  | [764][M+3] <sup>+</sup>                       | 2   |
| 1369952  | 886280.1 | [459][M] <sup>+</sup>                         | 114 |
| 2411020  | 3695028  | [280][M+1] <sup>+</sup>                       | 169 |
| 8.09E+09 | 1.81E+10 | [1350][M] <sup>+</sup>                        | 1   |
| 4163459  | 2720761  | [1052][M] <sup>+</sup> [M+Na] <sup>+</sup> 5: | 213 |
| 1674976  | 2485425  | [264][M] <sup>+</sup>                         | 22  |
| 2310320  | 2062227  | [662][M] <sup>+</sup> [M+Na+NH                | 221 |
| 8584238  | 8967984  |                                               | 84  |
| 13399273 | 67610025 | [657][M] <sup>+</sup> [M+H] <sup>+</sup> 41:  | 79  |
| 467945.7 | 808251.1 | [2M+2Na+H                                     | 11  |
| 5332740  | 1907629  | [4][M] <sup>+</sup>                           | 217 |
| 313448.8 | 223218.3 | [M+2K-H] <sup>+</sup>                         | 55  |
| 1.21E+08 | 77895637 | [901][M] <sup>+</sup>                         | 75  |
| 1806713  | 2444026  |                                               | 414 |
| 20688776 | 20231642 |                                               | 39  |
| 4.56E+08 | 983604.2 |                                               | 15  |
| 1537076  | 2868267  | [497][M] <sup>+</sup>                         | 103 |
| 328201.7 | 332816.3 | [1106][M] <sup>2</sup> [3M+2H] <sup>2+</sup>  | 31  |
| 820960.2 | 553039.7 | [M+K] <sup>+</sup> 60:                        | 143 |
| 182383.9 | 1322272  |                                               | 136 |
| 872165.6 | 691787.2 |                                               | 189 |
| 1086823  | 1113421  | [191][M+1] <sup>+</sup>                       | 66  |
| 3628653  | 3461812  | [456][M] <sup>2+</sup>                        | 2   |
| 6320001  | 8128979  | [M+K] <sup>+</sup> 37:                        | 284 |
| 905718.2 | 356290.1 |                                               | 413 |
| 370807.6 | 783039.9 | [796][M+2] <sup>+</sup>                       | 142 |
| 283294.4 | 1400710  | [M+K] <sup>+</sup> 17:                        | 49  |
| 467544.1 | 59534.98 |                                               | 280 |
| 860108.9 | 578146.8 |                                               | 35  |
| 5238302  | 4524652  | [103][M+1] <sup>2+</sup>                      | 2   |
| 801579.2 | 705488.2 |                                               | 52  |
| 121196.7 | 403002.5 | [M+2Na-H]                                     | 209 |
| 274348.3 | 528958.9 |                                               | 91  |
| 658388.6 | 763407.7 | [1562][M] <sup>+</sup>                        | 143 |
| 1122903  | 7366934  | [M+Na] <sup>+</sup> 3:                        | 79  |
| 4721848  | 4328632  | [107][M+3] <sup>2+</sup>                      | 2   |
| 96851.44 | 30949534 |                                               | 163 |
| 8811101  | 9669024  | [M+K+NH <sub>3</sub>                          | 171 |
| 2563393  | 2348477  | [807][M+1] <sup>+</sup>                       | 143 |
| 178586   | 116600   |                                               | 47  |

|          |          |                      |     |
|----------|----------|----------------------|-----|
| 763003.9 | 1512417  |                      | 190 |
| 631084   | 1018025  |                      | 84  |
| 76556551 | 8597814  | [M+Na]+ 4:           | 13  |
| 10460398 | 6817394  | [286][M]+ [M+K]+ 27: | 17  |
| 212432   | 767020.8 |                      | 288 |
| 516609.8 | 612154   |                      | 248 |
| 30997701 | 16342508 | [981][M+2]+          | 18  |
| 2346651  | 710161.8 |                      | 18  |
| 180017.3 | 197423.9 | [355][M+1]+          | 86  |
| 150221.9 | 101696.1 |                      | 176 |
| 1102141  | 1262396  | [M+H]+ 22:           | 143 |
| 1216995  | 4774890  | [M+K+NH3             | 254 |
| 166304   | 969579.6 |                      | 161 |
| 236186.9 | 88889.97 |                      | 20  |
| 511978.4 | 246595.3 |                      | 229 |
| 954963.4 | 3658320  | [1349][M]+ [3M+2K-H] | 49  |
| 903183.1 | 634425   | [1415][M+2]+         | 140 |
| 394569.6 | 218945   |                      | 100 |
| 1962435  | 7202672  | [1488][M+2]+         | 11  |
| 136012.3 | 107596.9 | [3M+3Na+]            | 17  |
| 9245474  | 6542468  | [581][M]+            | 267 |
| 161509   | 453945.4 | [435][M+3]+          | 103 |
| 5938585  | 34954344 | [1488][M+1]+         | 11  |
| 746745.1 | 701258.1 |                      | 288 |
| 897531.9 | 1280314  | [M+K]+ 20:           | 90  |
| 1228128  | 1087333  | [675][M]+            | 123 |
| 4054412  | 245631.6 |                      | 52  |
| 1045377  | 168871.9 | [1194][M+2]+         | 133 |
| 3215826  | 8917396  |                      | 2   |
| 1718945  | 9842074  | [590][M]+ [M+Na]+ 3: | 95  |
| 129470   | 3518418  |                      | 126 |
| 273136.4 | 333814.3 | [2M+2Na+]            | 160 |
| 9157254  | 31169507 | [M+K]+ 42:           | 11  |
| 8118601  | 13478766 |                      | 2   |
| 51632.15 | 1190594  | [165][M+4]+          | 199 |
| 6709574  | 9109302  |                      | 2   |
| 225580.3 | 195789.2 |                      | 89  |
| 602447.1 | 1148040  | [M+H]+ 31:           | 196 |
| 285745.1 | 130335.1 |                      | 398 |
| 818677.8 | 312012.8 |                      | 343 |
| 2817053  | 1349678  |                      | 55  |
| 94398.36 | 463784.8 | [M+Na]+ 2:           | 49  |
| 4539637  | 70198167 | [866][M]+ [M+Na]+ 4: | 55  |
| 1666119  | 609143.2 | [617][M+1]2+         | 243 |
| 274421.9 | 584092.1 |                      | 239 |
| 49914.28 | 216218.1 | [M+Na]+ 3:           | 199 |
| 241840.9 | 150639.1 | [M+H]+ 59:           | 312 |

|          |          |                     |     |
|----------|----------|---------------------|-----|
| 7333567  | 27430884 |                     | 1   |
| 257549.9 | 161112.2 |                     | 204 |
| 517326.8 | 762503.9 | [537][M+1]2+        | 70  |
| 1651491  | 2233868  | [398][M+1]+         | 250 |
| 910353.3 | 1109249  | [935][M]+ [M+K+NH3  | 229 |
| 511002.1 | 476316.7 |                     | 251 |
| 15072322 | 31121387 | [592][M]+ [M+Na+NH  | 116 |
| 253183.2 | 439404.9 | [M+K+HCO            | 119 |
| 1941682  | 4115437  | [3M+2Na]2           | 232 |
| 1175713  | 16726701 | [990][M]+ [M+H]+ 52 | 55  |
| 18102567 | 26276138 | [694][M]+ [M+H]+ 43 | 218 |
| 99142.86 | 67721.89 |                     | 425 |
| 5466118  | 11064982 |                     | 2   |
| 1064542  | 660475.3 |                     | 236 |
| 3289908  | 2908074  |                     | 54  |
| 600774.2 | 343890.9 | [724][M]2+          | 17  |
| 1434060  | 916380.7 | [566][M+1]+         | 14  |
| 719119.2 | 1398152  | [377][M]+           | 81  |
| 1864507  | 11663669 |                     | 1   |
| 9538588  | 49784235 | [924][M+1]+         | 11  |
| 4.74E+09 | 32957010 | [764][M]+           | 2   |
| 715204   | 1297508  | [434][M]+           | 194 |
| 433412.1 | 709187.6 | [256][M+1]+         | 60  |
| 4987390  | 3689559  | [1090][M]+          | 200 |
| 431000.8 | 279565.3 | [M+K]+ 33           | 78  |
| 771817   | 1236524  | [829][M]+           | 354 |
| 3288033  | 1727889  |                     | 53  |
| 138171.5 | 424030.6 | [71][M+2]+          | 279 |
| 596057.4 | 473035.5 | [7][M+1]+           | 22  |
| 1006401  | 4047642  | [594][M+2]+         | 49  |
| 46628.44 | 482185.7 | [1066][M+2]+        | 83  |
| 1623293  | 2384162  | [277][M]+           | 22  |
| 43872.15 | 264224.7 | [M+H-CH2]           | 49  |
| 896166.7 | 2309369  | [88][M+1]+          | 91  |
| 1292503  | 1025966  |                     | 354 |
| 17153929 | 62890765 | [M+H]+ 75           | 11  |
| 274073.4 | 798771.3 | [M+H]+ 25           | 75  |
| 606666.4 | 3538761  |                     | 167 |
| 254237.8 | 362257.5 |                     | 160 |
| 74792.3  | 1024741  |                     | 55  |
| 2236099  | 2555927  |                     | 158 |
| 128962.3 | 404424.3 |                     | 39  |
| 11460852 | 12747032 |                     | 1   |
| 27545663 | 43939937 | [252][M]+           | 114 |
| 297318.6 | 279631.8 | [M+2H-C6H           | 160 |
| 43764.57 | 526698.1 | [M+K]+ 36           | 49  |
| 778580.5 | 805061.8 |                     | 175 |

|          |          |                                               |     |
|----------|----------|-----------------------------------------------|-----|
| 54363.75 | 198624.2 | [M+H] <sup>+</sup> 42                         | 49  |
| 171282.1 | 276168.2 |                                               | 221 |
| 6454234  | 2362457  | [1480][M+1] <sup>+</sup>                      | 243 |
| 8023.383 | 797128.3 |                                               | 172 |
| 9822516  | 9675353  | [222][M+1] <sup>+</sup>                       | 95  |
| 237329.2 | 402195.2 | [M+H-CH <sub>2</sub> ]                        | 277 |
| 1203355  | 870421.4 |                                               | 173 |
| 267754.9 | 413376.6 | [554][M+1] <sup>+</sup>                       | 19  |
| 271891.3 | 321228.8 | [M+H] <sup>+</sup> 45                         | 276 |
| 2315230  | 3967603  | [238][M+1] <sup>+</sup>                       | 61  |
| 1452539  | 1077554  |                                               | 309 |
| 923886   | 333183.8 | [1496][M] <sup>+</sup>                        | 320 |
| 2097291  | 3309551  | [M+H] <sup>+</sup> 31                         | 83  |
| 161393.1 | 237003.2 |                                               | 347 |
| 360056   | 577760.7 | [253][M+3] <sup>+</sup>                       | 119 |
| 416028.9 | 610166.9 |                                               | 70  |
| 1738219  | 1160377  | [1180][M] <sup>+</sup> [M+K] <sup>+</sup> 56  | 143 |
| 3466360  | 4386250  | [74][M] <sup>+</sup> [M+H-H <sub>2</sub> O]   | 208 |
| 471449.9 | 192131.3 |                                               | 343 |
| 2575004  | 3734351  |                                               | 265 |
| 21240524 | 17663997 | [1305][M+1] <sup>+</sup>                      | 81  |
| 2087203  | 1381944  | [968][M] <sup>+</sup>                         | 18  |
| 477298.6 | 1139354  |                                               | 199 |
| 358494.8 | 148727.6 |                                               | 55  |
| 4.09E+09 | 11940177 | [M+Na] <sup>+</sup> 3                         | 4   |
| 491333.5 | 1648502  | [435][M+4] <sup>+</sup>                       | 103 |
| 1029662  | 835016.9 | [1278][M+3] <sup>+</sup>                      | 34  |
| 300620.5 | 1385999  | [M+H-CO <sub>2</sub> ]                        | 176 |
| 6474447  | 11690702 | [52][M] <sup>+</sup>                          | 91  |
| 273598.6 | 226838.5 | [2M+2Na+I]                                    | 31  |
| 371910.4 | 100490.5 | [854][M+1] <sup>+</sup>                       | 319 |
| 772077   | 9085464  | [72][M] <sub>2</sub> <sup>+</sup>             | 2   |
| 7549976  | 2495115  | [1112][M] <sup>+</sup> [M+H-H <sub>2</sub> O] | 133 |
| 1011686  | 3376280  | [275][M] <sup>+</sup>                         | 49  |
| 771046.6 | 4530408  |                                               | 11  |
| 3677453  | 2589598  | [1077][M] <sup>+</sup> [M+K] <sup>+</sup> 51  | 143 |
| 8784.757 | 184673.9 | [2M+Na+K]                                     | 199 |
| 1005481  | 228599   | [M+Na] <sup>+</sup> 3                         | 217 |
| 708107.5 | 330967   | [1552][M+2] <sup>+</sup>                      | 232 |
| 573272.9 | 705195.9 |                                               | 93  |
| 25313.03 | 64587.89 |                                               | 83  |
| 5147407  | 7226693  | [351][M+1] <sup>+</sup>                       | 151 |
| 374314.2 | 7241410  | [856][M] <sup>+</sup>                         | 55  |
| 2282563  | 624320.6 | [2M+K] <sup>+</sup> 2                         | 17  |
| 45430.54 | 360936.7 | [3M+2Na+I]                                    | 55  |
| 268915.7 | 307622.3 |                                               | 244 |
| 1143579  | 1208069  |                                               | 217 |

|          |          |                       |     |
|----------|----------|-----------------------|-----|
| 186518.1 | 1020196  | [3M+H+K]2             | 49  |
| 3755492  | 4173278  | [1172][M]+ [M+2K-H]+  | 138 |
| 4038191  | 3525854  | [M+H]+ 240            | 353 |
| 40964979 | 56421108 | [668][M+2]+           | 4   |
| 901478.5 | 965043.9 | [1281][M]+            | 81  |
| 191037.5 | 2333391  |                       | 79  |
| 366598.8 | 2385998  |                       | 290 |
| 1801411  | 1927271  | [M+K]+ 398            | 177 |
| 1690365  | 1911164  | [M+H-H2O]             | 11  |
| 156504.1 | 170133.2 | [1271][M]2 [M+2H-NH2] | 219 |
| 20779028 | 28191731 | [126][M]+             | 105 |
| 2074978  | 3107951  | [M+H]+ 320            | 31  |
| 2.32E+08 | 322445.2 |                       | 21  |
| 282150.8 | 416930.2 |                       | 220 |
| 248121.5 | 945280.9 |                       | 69  |
| 647982   | 81017.32 |                       | 312 |
| 8359028  | 9856366  | [M+H]+ 260            | 237 |
| 3696962  | 3085229  |                       | 384 |
| 1.48E+08 | 2.13E+08 | [202][M]+             | 41  |
| 232180.7 | 72078.07 |                       | 58  |
| 478974.8 | 1353571  |                       | 396 |
| 92928.03 | 95631.85 | [1329][M+2]+          | 223 |
| 214768.7 | 217101.3 | [131][M+1]+           | 221 |
| 1258301  | 546298   | [M+H-CO]+             | 25  |
| 123100.1 | 683608.7 | [M+H]+ 450            | 104 |
| 54898.35 | 1039717  | [3M+2Na]2             | 55  |
| 225682.5 | 101580.6 |                       | 309 |
| 1539310  | 6765146  | [250][M]+ [M+H]+ 300  | 90  |
| 3360995  | 2663369  |                       | 2   |
| 14250854 | 29234910 |                       | 1   |
| 262840.9 | 317314.9 | [326][M+1]+           | 280 |
| 103890.4 | 199926.5 | [M+H]+ 600            | 276 |
| 284272.4 | 332532.2 |                       | 177 |
| 861832.4 | 559262.2 |                       | 447 |
| 1746024  | 2041683  | [131][M]+ [M+H-H2O]   | 221 |
| 1737249  | 1272952  |                       | 175 |
| 9114368  | 5816077  | [1464][M]+            | 278 |
| 48383.7  | 424224.5 | [1433][M+1]+          | 55  |
| 137528.7 | 576669   |                       | 49  |
| 1096376  | 2249963  | [1260][M]+            | 176 |
| 237507.3 | 117187.2 | [M+H+HCC]             | 119 |
| 137636.5 | 693464.6 | [M+K]+ 270            | 83  |
| 436937.8 | 2701524  | [1158][M+1]+          | 299 |
| 773141.1 | 1382384  |                       | 323 |
| 131085   | 195293.7 | [865][M+1]+           | 96  |
| 705364.6 | 5229792  |                       | 1   |
| 10057548 | 21698638 | [88][M]+              | 91  |



|          |          |                     |     |
|----------|----------|---------------------|-----|
| 185010.5 | 59570.87 |                     | 100 |
| 237730.2 | 219003.1 | [1109][M+2]3+       | 456 |
| 477171.1 | 234961.6 | [M+Na+Na            | 245 |
| 86616.97 | 901224.8 |                     | 69  |
| 720181.7 | 2004940  | [1574][M+2]+        | 11  |
| 401836.9 | 349040.7 | [M+H-CH2]           | 14  |
| 333012.5 | 308819.9 |                     | 41  |
| 1261526  | 1232298  | [309][M]+           | 165 |
| 9353846  | 8028913  | [1278][M+2]+        | 34  |
| 599097.8 | 467283.5 | [M+2H-CO            | 153 |
| 122314.4 | 164256.2 |                     | 62  |
| 912683.6 | 1276448  | [M+Na+NH            | 17  |
| 1.19E+08 | 1.02E+08 | [1041][M+1]+        | 29  |
| 7417948  | 5741245  | [943][M]+ [M+K]+ 47 | 143 |
| 2371014  | 2999988  | [104][M]+           | 27  |
| 5811432  | 19223701 |                     | 81  |
| 667194.2 | 176777.3 | [M+H]+ 66           | 29  |
| 3521711  | 3591530  | [M+H]+ 31           | 79  |
| 6901872  | 8709757  | [M+Na+Na            | 146 |
| 1121029  | 319138.4 |                     | 355 |
| 556466.3 | 144265.6 | [2M+2Na+I           | 100 |
| 20480.33 | 155978.8 |                     | 178 |
| 114192.1 | 1217203  |                     | 55  |
| 5600171  | 11136926 | [664][M]+           | 232 |
| 425741.1 | 399190.1 | [715][M+1]+         | 62  |
| 497713.9 | 2963030  |                     | 79  |
| 159064   | 826595.7 |                     | 194 |
| 3615193  | 2519320  | [1437][M+2]+        | 45  |
| 2084262  | 1250739  | [M+2H-C5            | 29  |
| 366176.9 | 445231.1 | [M+Na]+ 3           | 78  |
| 180759.2 | 460533.7 |                     | 186 |
| 11434975 | 24827584 |                     | 1   |
| 471863   | 2694651  |                     | 10  |
| 2261340  | 2907864  |                     | 151 |
| 703259.9 | 1294087  | [M+H-H2O]           | 196 |
| 395387.5 | 5514049  | [1177][M+1]+        | 95  |
| 1125011  | 445129.7 | [930][M+2]+         | 175 |
| 1248074  | 2020108  | [337][M+1]+         | 77  |
| 2083452  | 1406294  |                     | 114 |
| 11275395 | 4371184  | [1159][M+1]+        | 133 |
| 108512.6 | 682369.9 | [804][M+1]+         | 124 |
| 959574.8 | 709281.7 | [2M+3H]3+           | 229 |
| 743231.5 | 1015440  | [M+H+HCC            | 146 |
| 1469597  | 9204955  | [139][M]+           | 337 |
| 1965213  | 738435.8 |                     | 55  |
| 1533008  | 1329417  | [609][M]+           | 134 |
| 2641986  | 1662775  | [1084][M+1]2+       | 29  |

|          |          |               |            |     |
|----------|----------|---------------|------------|-----|
| 2992016  | 6017967  | [256][M]+     | [M+K]+ 270 | 60  |
| 463534.2 | 461330.3 |               | [M+H+HCC   | 17  |
| 573912.1 | 336046.6 |               |            | 259 |
| 211301.5 | 1067720  |               |            | 159 |
| 628867.2 | 955959.3 |               | [M+Na+NH   | 17  |
| 1112163  | 750812.6 | [338][M+2]+   |            | 118 |
| 739829   | 822262.1 |               |            | 259 |
| 300065.7 | 641834.2 |               |            | 23  |
| 5140722  | 5038118  | [148][M+1]+   |            | 156 |
| 215147.3 | 234193.9 |               |            | 315 |
| 994195.8 | 2486002  | [1123][M+2]+  |            | 26  |
| 52065952 | 53657720 | [222][M]+     |            | 95  |
| 75908429 | 1.57E+08 | [1350][M+3]+  |            | 1   |
| 863903.4 | 1022571  |               |            | 301 |
| 889380   | 539322.5 | [1120][M+2]+  |            | 118 |
| 161231.1 | 170350.4 |               |            | 49  |
| 426780.7 | 396702.6 |               |            | 87  |
| 283971   | 451623.3 |               |            | 229 |
| 10372927 | 10369384 | [17][M]+      |            | 156 |
| 5425741  | 4302152  | [484][M]+     |            | 297 |
| 749863   | 673506.4 |               |            | 214 |
| 68554502 | 58214891 | [1108][M+1]+  |            | 29  |
| 396339.2 | 857595.4 | [723][M+1]+   |            | 342 |
| 299052.3 | 3930019  |               |            | 290 |
| 2040923  | 1141897  |               |            | 216 |
| 12546.59 | 449219.7 | [615][M+1]+   |            | 96  |
| 1906054  | 3936826  |               |            | 81  |
| 234780.5 | 272126.8 |               |            | 169 |
| 256640.3 | 583854.5 |               |            | 221 |
| 69855.31 | 497957.3 |               |            | 381 |
| 3932465  | 3045507  | [1372][M+2]+  |            | 48  |
| 280613.2 | 367761.8 |               |            | 165 |
| 8452344  | 7650200  | [448][M]+     |            | 217 |
| 1284500  | 7260776  |               | [2M+2Na+]  | 11  |
| 424259.6 | 429084.7 | [1372][M+3]+  |            | 48  |
| 791144.1 | 465975.8 |               |            | 62  |
| 900379.4 | 10920823 |               |            | 154 |
| 200089.1 | 786834.1 |               |            | 97  |
| 16836689 | 14231017 | [1234][M+1]+  |            | 134 |
| 104102.7 | 394490.1 | [1544][M]+    | [M+H]+ 970 | 23  |
| 368881.3 | 292914.8 |               | [M+H+K]2+  | 11  |
| 204584.9 | 129319.4 | [1057][M+1]2+ |            | 201 |
| 4068732  | 5330482  | [517][M+1]+   |            | 162 |
| 435889.9 | 235891.3 |               |            | 121 |
| 35643011 | 14459678 | [1159][M]+    | [M+H]+ 580 | 133 |
| 51284.33 | 157765.4 |               |            | 39  |
| 119055.7 | 89138.58 |               | [M+K]+ 230 | 116 |

|          |          |                     |     |
|----------|----------|---------------------|-----|
| 22702.64 | 806080.3 | [1237][M+5]+        | 29  |
| 969989.1 | 454881.8 |                     | 18  |
| 256600.8 | 132458.8 | [M+K+NH3            | 17  |
| 141329.7 | 160310.7 | [1132][M+1]+        | 352 |
| 4138003  | 6766035  |                     | 17  |
| 60201140 | 77087269 |                     | 41  |
| 96257.65 | 204208   | [M+K+NaCl           | 55  |
| 1349110  | 4774737  | [435][M+2]+         | 103 |
| 2916526  | 2141907  | [1045][M+2]+        | 17  |
| 3578329  | 2998390  |                     | 198 |
| 1820514  | 9377436  | [633][M+1]+         | 79  |
| 27556572 | 39162306 | [202][M+1]+         | 41  |
| 2018982  | 306025.3 | [1060][M]2+         | 244 |
| 349781   | 84592.53 |                     | 253 |
| 1315635  | 36957655 |                     | 1   |
| 338237.7 | 658648.8 | [1213][M+1]+        | 78  |
| 354916.8 | 155264.8 | [1036][M+1]+        | 3   |
| 455809.6 | 839269.1 | [M+H+NH3            | 209 |
| 981239.3 | 809220.6 | [M+H-CO2]           | 29  |
| 511340.1 | 364338.8 | [M+H-H2O]           | 90  |
| 401299.2 | 2369700  | [14][M]2+ [M+2H]2+  | 178 |
| 13549180 | 19750357 | [280][M]+ [M+H]+ 31 | 169 |
| 531733.2 | 881140.8 |                     | 338 |
| 2772327  | 1907782  |                     | 1   |
| 93514.19 | 237614.3 |                     | 245 |
| 145799.8 | 90367339 |                     | 99  |
| 1039723  | 1195777  | [1028][M]+          | 29  |
| 330308   | 215016.1 | [310][M]3+          | 62  |
| 128049.5 | 278360.1 |                     | 378 |
| 78231.74 | 513493.4 | [M+Na]+ 5           | 49  |
| 3833080  | 3049544  | [493][M+1]+         | 2   |
| 221181.8 | 834476.5 | [M+Na]+ 5           | 26  |
| 267548.1 | 176446.1 | [604][M+1]+         | 23  |
| 459787.1 | 430721.9 |                     | 200 |
| 380220.2 | 1341988  |                     | 63  |
| 66088.14 | 14426.76 |                     | 18  |
| 1341317  | 959728.7 |                     | 202 |
| 4982681  | 24746990 | [782][M]+ [M+K+HCO  | 95  |
| 710104   | 13159728 | [866][M+1]+         | 55  |
| 166615.9 | 120431.2 |                     | 34  |
| 177096.2 | 180370.6 | [M+Na]+ 3           | 262 |
| 9798866  | 15008820 |                     | 194 |
| 3113122  | 2324398  | [1173][M+2]+        | 25  |
| 983339.7 | 13082035 |                     | 11  |
| 1499721  | 516700.4 | [1098][M+1]+        | 13  |
| 2054502  | 2015117  | [767][M]+ [M+H-COCl | 116 |
| 721345.8 | 569985   | [1382][M+2]+        | 146 |

|          |          |                                    |     |
|----------|----------|------------------------------------|-----|
| 256626.3 | 1238378  |                                    | 124 |
| 297615.4 | 438961   | [M+Na]+ 2                          | 238 |
| 249353.7 | 427318.1 | [305][M+1]+                        | 89  |
| 257440.3 | 242906.6 |                                    | 20  |
| 427287.8 | 552155.7 | [M+Na]+ 5                          | 208 |
| 487783.7 | 11530267 | [736][M]+ [M+Na]+ 4                | 55  |
| 921490.1 | 667956.9 |                                    | 321 |
| 19085.43 | 260634.6 |                                    | 414 |
| 472020.6 | 204359.7 |                                    | 156 |
| 69128.98 | 71987.35 | [1440][M+1]+                       | 340 |
| 918561.8 | 537253.7 |                                    | 198 |
| 2178825  | 1896119  |                                    | 176 |
| 1105891  | 6368318  |                                    | 91  |
| 7732455  | 5019057  |                                    | 241 |
| 652438.2 | 3570296  | [1118][M]+ [M+Na+CF <sub>3</sub> ] | 103 |
| 319296   | 400473.9 | [M+Na]+ 4                          | 60  |
| 153888.1 | 218160.9 | [596][M+1]+                        | 94  |
| 961662.8 | 963934.3 | [M+Na]+ 2                          | 284 |
| 80243.63 | 1395552  | [2M+H]+ 2                          | 55  |
| 2603445  | 2191166  | [1234][M+2]+                       | 134 |
| 17422411 | 43224130 | [1292][M+1]+                       | 1   |
| 79674.32 | 205242.4 |                                    | 360 |
| 8886737  | 24970049 | [206][M+2]+                        | 49  |
| 12135150 | 2862201  | [321][M]+                          | 134 |
| 2744736  | 3061928  |                                    | 212 |
| 606617.3 | 449825.2 | [69][M+1]+                         | 83  |
| 547248.6 | 568379.6 |                                    | 54  |
| 30969866 | 31691076 | [894][M+1]+                        | 60  |
| 2139575  | 1107738  | [488][M]+                          | 200 |
| 2266059  | 620379.9 | [M+Na]+ 5                          | 25  |
| 4132433  | 6764514  | [252][M+1]+                        | 114 |
| 367062.6 | 458149   |                                    | 246 |
| 251120.2 | 318038.9 | [627][M+1]+                        | 20  |
| 3040436  | 4435258  | [M+K+NH <sub>3</sub> ]             | 172 |
| 3142878  | 5157135  | [1067][M]+ [M+Na]+ 5               | 116 |
| 505012.8 | 1286726  |                                    | 195 |
| 253714.6 | 177016   |                                    | 106 |
| 4.15E+08 | 5.35E+08 | [544][M]+                          | 19  |
| 1603666  | 950141.7 |                                    | 68  |
| 544293.7 | 677163.4 | [M+Na+NH <sub>3</sub> ]            | 199 |
| 826580.2 | 1292458  | [1067][M+1]+                       | 116 |
| 7390.208 | 374694.3 |                                    | 172 |
| 196816.2 | 1515461  | [590][M+1]+                        | 95  |
| 1582488  | 1380375  | [M+K]+ 26                          | 146 |
| 792589.9 | 636445.7 |                                    | 280 |
| 210247.8 | 190681   |                                    | 41  |
| 127576.6 | 44356.45 | [984][M+1]+                        | 263 |

|          |          |                       |     |
|----------|----------|-----------------------|-----|
| 1170272  | 1990373  | [1478][M+1]+          | 26  |
| 2847729  | 4336876  |                       | 63  |
| 7720389  | 13878466 | [107][M+4]2+          | 2   |
| 3653756  | 6686867  | [215][M]+             | 138 |
| 14359446 | 6014088  | [1480][M]+ [M+Na]+ 7! | 243 |
| 901667.2 | 3926784  | [1482][M+1]+          | 11  |
| 1179209  | 10233812 |                       | 1   |
| 2483796  | 4117821  | [433][M+1]+           | 151 |
| 41252.47 | 561059.7 |                       | 55  |
| 471602.1 | 1665255  | [1390][M]+            | 95  |
| 657476.3 | 2649018  | [72][M+1]2+           | 2   |
| 302267.3 | 261039.6 | [3M+Na+K]             | 116 |
| 264308.5 | 459082.4 |                       | 341 |
| 242283.4 | 129238.8 |                       | 91  |
| 2039029  | 1157345  | [185][M+1]+           | 240 |
| 316280.8 | 54938.01 | [M+H]+ 41!            | 309 |
| 57417.54 | 36014.46 | [892][M+1]+           | 25  |
| 2192555  | 715443   | [217][M]+             | 289 |
| 743364.8 | 1268956  |                       | 258 |
| 336657   | 438545.5 | [1547][M+1]+          | 116 |
| 906280.1 | 797231.3 | [147][M+2]+           | 66  |
| 207418.2 | 186871.9 | [300][M+1]2+          | 133 |
| 4490647  | 5635649  | [137][M+1]+           | 36  |
| 277858.9 | 219461.6 |                       | 330 |
| 1898075  | 1396095  | [M+Na]+ 3!            | 230 |
| 11585786 | 11616887 | [255][M]+ [M+H]+ 30!  | 214 |
| 271490.8 | 150447.9 | [1234][M+3]+          | 134 |
| 452285   | 240423.4 | [M+H]+ 55!            | 87  |
| 8911652  | 11019993 | [154][M]+             | 41  |
| 87921.26 | 896733.1 | [M+H-H2O]             | 49  |
| 1021030  | 2541259  |                       | 414 |
| 7366193  | 3062247  | [507][M]2+            | 1   |
| 402939.5 | 566456.1 | [M+H-C4H8]            | 304 |
| 1.09E+08 | 1.06E+08 | [645][M]+ [M+Na]+ 3!  | 52  |
| 587974.8 | 412485.4 | [1143][M+1]+          | 151 |
| 1646267  | 789447.5 |                       | 290 |
| 252835.6 | 322804.1 | [M+K]+ 45!            | 229 |
| 1687468  | 1547513  | [1253][M+1]+          | 73  |
| 210395.7 | 722119.7 |                       | 4   |
| 303811.9 | 210416.5 |                       | 280 |
| 1926343  | 1052246  | [792][M+1]+           | 329 |
| 64774.25 | 480265.7 | [2M+H+Na]             | 49  |
| 534334.8 | 88782.69 |                       | 355 |
| 835773.2 | 4443629  |                       | 71  |
| 94493.05 | 138842.7 |                       | 179 |
| 1538126  | 1046614  | [M+K]+ 64!            | 214 |
| 4800016  | 6465823  | [M+H]+ 24!            | 342 |

|          |          |                      |     |
|----------|----------|----------------------|-----|
| 99636136 | 1.3E+08  | [544][M+1]+          | 19  |
| 20197733 | 1.78E+08 | [1445][M+1]+         | 1   |
| 16969151 | 13913840 | [1341][M+1]+         | 1   |
| 752477.8 | 1430696  | [M+K+NH3             | 178 |
| 1495231  | 2460253  |                      | 239 |
| 643413.9 | 1291927  | [685][M]+ [M+H-CO]+  | 169 |
| 29961788 | 69823833 |                      | 1   |
| 252606.7 | 301296.2 | [M+Na]+ 50           | 86  |
| 1353936  | 1461041  | [M+H+NH3             | 272 |
| 11209841 | 53841099 | [M+H]+ 45:           | 171 |
| 4048457  | 23174124 | [486][M]+ [M+K]+ 33: | 95  |
| 177551.3 | 64719.81 | [1140][M+2]+         | 119 |
| 210594.3 | 283091.6 |                      | 29  |
| 119331.2 | 570538.6 |                      | 55  |
| 797415   | 794754.4 | [261][M+2]+          | 100 |
| 1182546  | 1847705  | [112][M]+            | 86  |
| 3272461  | 14122908 |                      | 1   |
| 1259197  | 1100091  | [1002][M+2]+         | 143 |
| 2610092  | 12418224 | [M+H]+ 45:           | 79  |
| 943761.3 | 242629.8 |                      | 14  |
| 0        | 746043.1 | [M+Na]+ 2:           | 180 |
| 39061080 | 56901939 | [240][M]+            | 106 |
| 566102.9 | 722982.2 |                      | 60  |
| 6138438  | 5010769  | [975][M+1]+          | 185 |
| 152726.5 | 116056.8 |                      | 34  |
| 12355800 | 9017408  | [58][M]+             | 261 |
| 693730.1 | 934972.4 | [1403][M]+           | 214 |
| 2181774  | 5442930  |                      | 2   |
| 1.89E+08 | 1.06E+08 | [981][M+1]+          | 18  |
| 6125479  | 10395039 | [M+H]+ 25:           | 208 |
| 3001471  | 1659670  | [M+K+NaCl            | 252 |
| 12174236 | 13016315 | [1050][M]+ [M+2K-H]+ | 60  |
| 5964983  | 2432854  | [77][M]+             | 217 |
| 403279.3 | 370561.8 | [443][M+1]+          | 146 |
| 458763.3 | 338849.5 |                      | 246 |
| 1591697  | 979533.3 |                      | 264 |
| 1610686  | 2240519  | [877][M]+            | 341 |
| 168403.6 | 252014.2 | [249][M+1]+          | 27  |
| 55823.45 | 155632.6 |                      | 86  |
| 838295.7 | 92123.78 | [1257][M+1]+         | 268 |
| 256393   | 112218.5 | [M+H-H2O]            | 90  |
| 1803474  | 1133435  |                      | 147 |
| 6778943  | 22024896 | [M+H-C3H:            | 4   |
| 399506.3 | 419627.6 |                      | 112 |
| 248486.1 | 315482.1 | [201][M+1]2+         | 18  |
| 2507379  | 2249954  | [427][M]+ [M+H]+ 35: | 381 |
| 206342.3 | 531585.8 | [95][M+1]+           | 290 |

|          |          |                      |     |
|----------|----------|----------------------|-----|
| 4620096  | 3801360  | [M+Na]+ 5:           | 75  |
| 1157995  | 8319897  | [481][M+1]2+         | 1   |
| 7133506  | 24481775 | [774][M]+            | 79  |
| 6998015  | 56608973 | [M+K]+ 45:           | 4   |
| 1372342  | 1601163  |                      | 434 |
| 4599786  | 5215924  | [1063][M]+           | 104 |
| 202598.1 | 583108.6 | [M+K]+ 41:           | 29  |
| 250182.9 | 112170.7 | [189][M+2]+          | 61  |
| 193251.2 | 3061868  | [990][M+1]+          | 55  |
| 50251509 | 44279953 | [1278][M+1]+         | 34  |
| 226271.5 | 415729.9 |                      | 191 |
| 799767.3 | 784478.3 |                      | 286 |
| 19876083 | 15805885 | [1041][M+2]+         | 29  |
| 67086.61 | 73887.19 |                      | 147 |
| 599039.5 | 580456.8 | [M+2Na]2+            | 217 |
| 1167395  | 1386193  | [1033][M]+           | 169 |
| 1248667  | 665104.8 |                      | 152 |
| 723186.7 | 470462.9 | [806][M+1]+          | 172 |
| 2288715  | 2806086  |                      | 32  |
| 378372.9 | 722214.2 |                      | 41  |
| 87940.97 | 2511040  |                      | 110 |
| 582367.8 | 515729.7 |                      | 205 |
| 6200541  | 22792210 | [M+K+CF3C            | 11  |
| 4176906  | 2996410  | [3M+3K-H]            | 29  |
| 307845.8 | 735265.4 |                      | 29  |
| 332235.7 | 350680.1 | [1406][M+1]+         | 138 |
| 281438.6 | 291005.1 | [M+H-NH3]            | 64  |
| 2378833  | 1804326  |                      | 33  |
| 1253222  | 1472285  | [73][M]+             | 277 |
| 1384602  | 2634867  | [M+H-CH2]            | 311 |
| 385317.7 | 233205.7 |                      | 289 |
| 5475423  | 5481265  | [80][M]+ [M+Na]+ 2:  | 172 |
| 1770195  | 4900753  |                      | 307 |
| 384958.8 | 481340.6 | [M+H]+ 25:           | 22  |
| 122135   | 448186.2 | [1378][M+1]+         | 172 |
| 746796   | 4498084  |                      | 10  |
| 2447526  | 2581668  |                      | 2   |
| 7931356  | 7059243  | [1418][M+1]+         | 134 |
| 1710903  | 2247754  | [M+K]+ 25:           | 218 |
| 906028.2 | 907646.5 | [M+2K-H]+            | 173 |
| 825709.6 | 1469329  | [M+Na]+ 2:           | 55  |
| 1348908  | 2988154  |                      | 154 |
| 2276851  | 2363476  | [443][M]+ [M+Na]+ 3: | 146 |
| 1083884  | 460508.5 |                      | 200 |
| 349018.7 | 116152.4 | [M+Na]+ 4:           | 264 |
| 10568721 | 33902461 | [M+Na+HC             | 11  |
| 1277573  | 3163333  |                      | 1   |

|          |          |                     |     |
|----------|----------|---------------------|-----|
| 514357.4 | 547568.8 | [957][M+1]+         | 75  |
| 8150.104 | 572757.6 | [1269][M+2]+        | 172 |
| 90633.22 | 137074.8 |                     | 149 |
| 312486.5 | 5948786  |                     | 1   |
| 23392024 | 68391765 | [107][M+2]2+        | 2   |
| 835593.5 | 2753495  | [269][M+4]+         | 103 |
| 987944.3 | 1539210  | [909][M]+           | 88  |
| 13467334 | 75380849 | [1035][M]+          | 2   |
| 50212.41 | 1506179  | [900][M]+           | 178 |
| 26470.8  | 614587.9 | [M+H-NH3]           | 55  |
| 556929.7 | 866835.5 | [142][M+1]+         | 290 |
| 277436.9 | 207802.6 |                     | 35  |
| 95827.99 | 134635.3 |                     | 33  |
| 249615.6 | 556528.5 | [925][M+3]+         | 172 |
| 134164.4 | 620054.3 |                     | 171 |
| 858599.3 | 275212.7 | [M+K]+ 65:          | 104 |
| 713163.6 | 574479.6 | [M+Na]+ 5:          | 120 |
| 3174958  | 4123420  | [872][M]+           | 2   |
| 1486660  | 498333.3 | [M+H]+ 90:          | 18  |
| 77905.24 | 364469.3 |                     | 209 |
| 245408.2 | 531842.7 |                     | 190 |
| 1678104  | 590019.4 | [1168][M]+          | 61  |
| 119720.4 | 1283087  | [139][M+1]+         | 337 |
| 423924.7 | 199131   |                     | 76  |
| 4577761  | 3531100  |                     | 338 |
| 364058.6 | 146079.1 | [M+Na]+ 6:          | 47  |
| 19220.61 | 649423.3 | [1435][M+1]+        | 55  |
| 304383.8 | 81436.4  |                     | 123 |
| 1681800  | 1199668  |                     | 228 |
| 419916.1 | 820277.3 |                     | 385 |
| 1.39E+08 | 1.22E+08 | [1278][M]+ [M+H+NH3 | 34  |
| 3203128  | 6665049  | [592][M+1]+         | 116 |
| 16834075 | 22012641 |                     | 2   |
| 1039377  | 1081188  | [368][M]2+ [M+2H]2+ | 254 |
| 208494.7 | 232185.6 | [M+H]+ 41:          | 55  |
| 131458.6 | 2119226  | [M+K]+ 67:          | 18  |
| 6873876  | 12786266 | [1533][M]+          | 54  |
| 1582840  | 1203482  | [1090][M+1]+        | 200 |
| 353068.8 | 174377.9 | [677][M+1]2+        | 46  |
| 3251569  | 3116744  |                     | 2   |
| 923645.3 | 325656.6 | [960][M]+           | 280 |
| 14266.66 | 463762.9 |                     | 235 |
| 356687.2 | 85766.55 | [2M+Na+K]           | 18  |
| 330078.3 | 234485.6 | [M+Na+NH            | 15  |
| 222466   | 881986.6 | [646][M+2]+         | 104 |
| 3437970  | 3388310  | [851][M]+           | 62  |
| 902568.3 | 2817105  | [610][M]+ [M+Na+Na  | 160 |



|          |          |                      |     |
|----------|----------|----------------------|-----|
| 417853.5 | 791569.6 | [1260][M+1]+         | 176 |
| 2616708  | 4528475  | [1478][M]+           | 26  |
| 294433.5 | 333464.5 | [M+K]+ 31:           | 160 |
| 12503380 | 7226687  | [2M+Na+2I            | 29  |
| 3150746  | 19790661 |                      | 53  |
| 7139309  | 5824255  | [648][M+1]+          | 20  |
| 1995092  | 12583714 | [657][M+1]+          | 79  |
| 6.48E+08 | 3.68E+08 | [981][M]+ [M+H]+ 52: | 18  |
| 27660747 | 26990188 | [645][M+1]+          | 52  |
| 226551.5 | 305158.6 |                      | 248 |
| 611122.9 | 444173.4 |                      | 23  |
| 16342899 | 7122376  |                      | 254 |
| 1.85E+08 | 2.27E+08 | [764][M+2]+          | 2   |
| 793368.8 | 729035.9 | [300][M]2+           | 133 |
| 1144192  | 1126178  | [1309][M]+           | 364 |
| 229772.1 | 497734.8 | [M+K]+ 37:           | 29  |
| 67562.51 | 196699   | [434][M+1]+          | 194 |
| 1298228  | 1810674  | [317][M+1]+          | 325 |
| 1231966  | 2343342  | [664][M+1]+          | 232 |
| 1888103  | 5427881  |                      | 117 |
| 37376.04 | 261663.4 | [M+H-C2H4            | 133 |
| 7033274  | 8694218  | [1115][M]+           | 41  |
| 5834258  | 7570398  | [244][M+2]+          | 27  |
| 1999921  | 2036278  |                      | 421 |
| 62582.46 | 116157   |                      | 106 |
| 206727.5 | 218245.9 | [M+H-CH2]            | 49  |
| 740849.8 | 392483.3 |                      | 54  |
| 1414297  | 2779877  |                      | 54  |
| 122853.7 | 243897.8 | [178][M+2]+          | 127 |
| 271093.2 | 61640.82 |                      | 119 |
| 764999.2 | 710135.6 |                      | 364 |
| 1264517  | 146619   | [776][M+1]2+         | 200 |
| 2966831  | 1808827  | [1539][M]+ [M+H+NH3  | 100 |
| 386971.1 | 520350.1 | [613][M+2]+          | 160 |
| 216947   | 1850065  |                      | 70  |
| 168516.5 | 79126.28 |                      | 46  |
| 481245.1 | 387637.8 |                      | 471 |
| 1084598  | 2212880  | [756][M]+            | 106 |
| 1539280  | 337400.4 |                      | 69  |
| 1020505  | 1603246  | [596][M]+            | 94  |
| 334746.6 | 318763.4 |                      | 62  |
| 404907.9 | 254617   | [M+H]+ 53:           | 17  |
| 571015   | 282717   | [M+H]+ 49:           | 23  |
| 126084.6 | 358430.3 |                      | 10  |
| 967441.8 | 823345.3 |                      | 137 |
| 394612.2 | 313830.1 | [969][M]3+ [2M+3H]3+ | 206 |
| 1132220  | 925873.6 | [963][M+1]+          | 116 |

|          |          |                      |     |
|----------|----------|----------------------|-----|
| 402925.8 | 184756.3 | [1355][M+5]+         | 25  |
| 11803089 | 32597058 | [478][M+4]+          | 1   |
| 2.07E+09 | 36448653 | [836][M]+            | 3   |
| 323526.5 | 215449.2 | [M+H+NH3             | 33  |
| 8709931  | 6130043  |                      | 241 |
| 1.19E+08 | 1.22E+08 | [894][M]+ [M+Na]+ 4  | 60  |
| 171593.8 | 203835.6 | [829][M+1]+          | 354 |
| 26346910 | 2719453  | [721][M]+ [M+K]+ 40  | 4   |
| 303117.2 | 287925.1 | [3M+3K-H]            | 52  |
| 498955.3 | 9087936  |                      | 7   |
| 28259126 | 32526014 | [32][M]+             | 19  |
| 202001.3 | 35709.74 |                      | 241 |
| 456739.9 | 1036267  | [52][M+1]+           | 91  |
| 210683.1 | 221146.4 |                      | 207 |
| 326479.4 | 89204.73 |                      | 18  |
| 240689.6 | 480516.4 | [224][M+2]+          | 304 |
| 5196865  | 1286015  | [1452][M]+ [M+Na]+ 7 | 18  |
| 537715   | 580857   | [225][M+1]2+         | 62  |
| 5120783  | 4959044  | [31][M+1]2+          | 1   |
| 2123895  | 8028834  |                      | 55  |
| 8475312  | 35797031 | [634][M]+ [M+K]+ 37  | 95  |
| 138551.7 | 877595.1 |                      | 265 |
| 35040.28 | 635898.8 |                      | 258 |
| 364821.4 | 811732   | [M+H-C4H8            | 169 |
| 721294   | 3556397  | [2M+2Na+]            | 95  |
| 498340.8 | 481614.4 |                      | 300 |
| 1860303  | 8151740  |                      | 1   |
| 184769.1 | 1757684  | [M+K]+ 64            | 25  |
| 535174.7 | 1061397  | [2M+2Na+]            | 155 |
| 105284.4 | 813497.1 | [M+H+HCC             | 104 |
| 30516.1  | 108239.1 |                      | 106 |
| 550789.8 | 600270.4 | [679][M]2+ [M+2H]2+  | 134 |
| 457628.2 | 1089694  |                      | 116 |
| 341765.2 | 721874.5 | [M+Na]+ 2            | 243 |
| 416307.3 | 485408   | [M+3H-C4H            | 66  |
| 755253.1 | 894148.5 | [M+Na]+ 4            | 169 |
| 685133   | 1122744  | [M+Na+K+]            | 101 |
| 21602239 | 1688789  | [835][M+3]+          | 2   |
| 56536.72 | 102534.4 | [3M+2K]2+            | 103 |
| 794692.2 | 1020778  |                      | 124 |
| 117267.3 | 415080.6 | [M+K+NH3             | 138 |
| 2574275  | 5204139  | [1203][M]+           | 2   |
| 8338008  | 21021891 | [800][M]2+           | 54  |
| 4155254  | 7243660  |                      | 164 |
| 769899.6 | 1245652  | [134][M+2]+          | 119 |
| 335977.1 | 931571.8 | [157][M+1]+          | 55  |
| 823954.1 | 530076.3 |                      | 252 |

|          |          |                       |     |
|----------|----------|-----------------------|-----|
| 3838708  | 14995644 | [389][M+1]+           | 1   |
| 76585.96 | 1414660  |                       | 69  |
| 251758.9 | 1219808  | [M+H-C5H8]            | 209 |
| 267556.5 | 346717   |                       | 227 |
| 3563516  | 3813761  | [1304][M]+ [M+K]+ 63: | 119 |
| 3893260  | 3615060  |                       | 97  |
| 181246.6 | 264051.6 |                       | 172 |
| 48626.42 | 1255667  |                       | 209 |
| 308193.8 | 370814.1 |                       | 277 |
| 83297933 | 94985310 | [320][M]+             | 2   |
| 1003889  | 320067.2 | [M+2K]2+ 6            | 40  |
| 1862805  | 3351198  |                       | 84  |
| 1109764  | 692846.6 | [195][M]2+            | 62  |
| 4072145  | 12373607 |                       | 11  |
| 13877.17 | 421766.7 |                       | 172 |
| 308080.6 | 100562.3 | [440][M+1]+           | 162 |
| 10332702 | 13429796 | [20][M]+              | 41  |
| 4290019  | 19660302 | [763][M+1]+           | 95  |
| 518852.4 | 1325062  |                       | 116 |
| 4538691  | 2591830  | [1084][M]2+           | 29  |
| 1.41E+08 | 1.43E+08 | [698][M]+ [M+Na+NH    | 52  |
| 3122800  | 562516.6 | [1257][M]+            | 268 |
| 1967322  | 516233.2 | [1452][M+1]+          | 18  |
| 15329688 | 6506312  | [666][M]+ [M+Na]+ 3:  | 23  |
| 127021.7 | 146879.2 |                       | 437 |
| 746673.2 | 552157.3 | [M+H-HCO              | 75  |
| 1763843  | 403764.8 |                       | 425 |
| 116771.2 | 136980   | [M+Na]+ 3:            | 284 |
| 706808.3 | 1573888  | [1533][M+2]+          | 54  |
| 78924.86 | 204784.3 |                       | 228 |
| 15600.78 | 148822.4 | [765][M+1]+           | 103 |
| 146564.1 | 873793.4 | [2M+K]+ 2(            | 104 |
| 94858.67 | 71899.83 |                       | 279 |
| 1901130  | 3146034  |                       | 292 |
| 1160339  | 2063618  | [652][M]+ [M+H+HCC    | 284 |
| 72360071 | 88989496 | [1420][M]+ [2M+Na]+ : | 11  |
| 600833.7 | 638419.3 | [858][M+1]+           | 281 |
| 7971798  | 388390.5 | [938][M]+             | 338 |
| 148883.4 | 1599575  | [856][M+1]+           | 55  |
| 873491.2 | 1085653  | [1172][M+1]+          | 138 |
| 66013.36 | 509276.9 | [614][M+2]+           | 171 |
| 40468.1  | 585085.2 | [M+Na+CF:             | 55  |
| 717384   | 557973.8 | [701][M+1]+           | 172 |
| 898853.5 | 709851.3 | [M+Na+HC              | 11  |
| 106842.3 | 299013.5 | [M+H-CO2]             | 47  |
| 1176532  | 1388141  |                       | 176 |
| 1920990  | 3553954  | [M+H-CO]+             | 221 |

|          |          |                                               |     |
|----------|----------|-----------------------------------------------|-----|
| 160780.5 | 353267.6 | [M+K+NH <sub>3</sub>                          | 116 |
| 7222553  | 9006561  | [569][M+4] <sup>+</sup>                       | 100 |
| 6870711  | 6562675  |                                               | 13  |
| 1650194  | 2371066  | [M+H-CH <sub>2</sub> ]                        | 162 |
| 954243.4 | 2689008  |                                               | 422 |
| 146233.9 | 245677.3 |                                               | 26  |
| 139965.9 | 889695.8 | [M+K] <sup>+</sup> 330                        | 95  |
| 2808982  | 673431.6 | [M+H] <sup>+</sup> 540                        | 18  |
| 8149655  | 9715150  | [38][M+1] <sup>+</sup>                        | 41  |
| 963850.8 | 7606858  |                                               | 340 |
| 1303815  | 1879588  | [M+H+HCC                                      | 4   |
| 1705141  | 2044928  | [603][M] <sup>+</sup>                         | 111 |
| 106297   | 115753.4 |                                               | 232 |
| 179744.3 | 246823.5 |                                               | 41  |
| 44609.48 | 881136.6 |                                               | 104 |
| 5166750  | 349198.5 |                                               | 289 |
| 2276437  | 13327327 | [1521][M+1] <sup>+</sup>                      | 11  |
| 2445389  | 5471463  |                                               | 291 |
| 2681112  | 1776909  | [642][M] <sup>+</sup>                         | 172 |
| 667894.5 | 1200213  | [M+H-CH <sub>3</sub> ]                        | 178 |
| 22541317 | 20307714 | [975][M] <sup>+</sup>                         | 185 |
| 3579992  | 8307230  |                                               | 372 |
| 1762556  | 1257523  | [1153][M] <sup>+</sup>                        | 412 |
| 40222260 | 33283510 | [974][M+1] <sup>+</sup>                       | 29  |
| 2885853  | 826542.4 | [M+K] <sup>+</sup> 310                        | 16  |
| 319236.8 | 699001   |                                               | 314 |
| 1.62E+08 | 3.45E+08 | [1266][M] <sup>+</sup>                        | 10  |
| 2168057  | 1407122  |                                               | 110 |
| 4143454  | 6155154  | [694][M+1] <sup>+</sup>                       | 218 |
| 4261120  | 27107191 | [1521][M] <sup>+</sup>                        | 11  |
| 490442.8 | 417092.4 |                                               | 82  |
| 374911.8 | 380281.4 | [M+H] <sup>+</sup> 250                        | 31  |
| 10201361 | 4229304  | [709][M] <sup>+</sup> [M+H] <sup>+</sup> 430  | 33  |
| 280300.1 | 182684.3 | [M+K+HCO                                      | 29  |
| 924114.6 | 523370.5 | [1264][M] <sup>+</sup> [M+K] <sup>+</sup> 600 | 205 |
| 889207.8 | 869343.3 |                                               | 237 |
| 73611.52 | 197066.8 |                                               | 18  |
| 51688.71 | 851991.1 | [614][M+1] <sup>+</sup>                       | 171 |
| 1205651  | 2336849  | [M+2Na] <sup>2+</sup>                         | 23  |
| 364383.2 | 693130.2 | [1141][M+2] <sup>+</sup>                      | 29  |
| 849539.5 | 1557197  | [87][M] <sup>+</sup>                          | 60  |
| 9230398  | 19249758 | [1266][M+2] <sup>+</sup>                      | 10  |
| 377413.9 | 307862.3 |                                               | 61  |
| 857128.2 | 3735010  |                                               | 154 |
| 4586974  | 10574528 | [M+Na] <sup>+</sup> 300                       | 117 |
| 96611.4  | 381681.8 | [1161][M+4] <sup>+</sup>                      | 49  |
| 560443   | 474630.3 | [M+Na] <sup>+</sup> 400                       | 168 |

|          |          |                      |     |
|----------|----------|----------------------|-----|
| 2616297  | 129723   | [M+H-COCl            | 100 |
| 321365.7 | 131293.9 |                      | 45  |
| 38567033 | 32190125 | [116][M]+            | 61  |
| 396019.3 | 943271.8 | [M+Na]+ 4            | 169 |
| 923832.6 | 4793460  | [782][M+1]+          | 95  |
| 234766.9 | 145585.8 | [63][M+1]+           | 179 |
| 2555426  | 2341800  |                      | 398 |
| 2323301  | 2756763  | [1115][M+1]+         | 41  |
| 37177520 | 37312524 | [698][M+1]+          | 52  |
| 1376913  | 1005775  | [M+K]+ 286           | 228 |
| 1068747  | 1558809  | [1111][M+1]+         | 13  |
| 483951.7 | 865684.5 | [M+Na]+ 30           | 49  |
| 783880.9 | 7776010  | [1269][M]+ [M+K]+ 61 | 172 |
| 1224169  | 2101315  |                      | 178 |
| 146217.6 | 779220.7 |                      | 441 |
| 1322522  | 1112363  | [343][M+2]+          | 79  |
| 638185   | 1158743  |                      | 253 |
| 666395.7 | 446985.9 | [M+Na+NH             | 40  |
| 162532.2 | 282971.4 |                      | 228 |
| 1.41E+08 | 1.22E+08 | [974][M]+            | 29  |
| 2628660  | 4316154  | [M+H-CH4]            | 215 |
| 384970.5 | 834334.8 | [1297][M+1]+         | 10  |
| 25709546 | 24814182 |                      | 77  |
| 166921.9 | 288744.6 | [702][M+3]+          | 26  |
| 2801629  | 4120926  | [420][M+1]2+         | 2   |
| 31576.93 | 962802.6 |                      | 178 |
| 2149371  | 434851.3 | [976][M]+            | 226 |
| 596158.1 | 2155588  | [164][M+3]+          | 55  |
| 213393.4 | 27221.15 |                      | 423 |
| 1202465  | 897505.7 | [M+Na]+ 5            | 18  |
| 201778.4 | 199584.8 | [38][M+2]+           | 41  |
| 18734.14 | 527588.8 | [M+H]+ 34            | 209 |
| 384709.3 | 760052.7 |                      | 41  |
| 53614.61 | 242637.4 | [652][M+1]+          | 284 |
| 721152   | 251232.4 |                      | 123 |
| 329790.8 | 1655597  | [2M+2Na+H            | 49  |
| 67860.27 | 334804.4 | [M+K]+ 706           | 49  |
| 356050.2 | 784025.2 |                      | 361 |
| 522805.1 | 515280   |                      | 327 |
| 51517204 | 44649907 | [1114][M+1]+         | 47  |
| 2782366  | 4886372  | [M+Na]+ 2            | 88  |
| 2545730  | 2595383  |                      | 194 |
| 160116.5 | 4541948  | [1289][M]+ [M+H+CF3O | 55  |
| 5695148  | 3952237  | [747][M+1]+          | 172 |
| 7665748  | 27057558 | [164][M+2]+          | 55  |
| 235155.8 | 1414409  | [538][M+1]+          | 55  |
| 2778440  | 2100665  | [1207][M+4]+         | 100 |

|          |          |                      |     |
|----------|----------|----------------------|-----|
| 481515.6 | 588703.3 | [111][M+2]+          | 83  |
| 415046.2 | 541469   | [1102][M]+           | 47  |
| 764660.8 | 873695.2 |                      | 373 |
| 96543.89 | 392264.7 | [832][M+5]+          | 26  |
| 1122397  | 634980.9 | [M+H]+ 30!           | 134 |
| 620632   | 436606   | [M+Na]+ 2            | 228 |
| 90344.24 | 589732   | [M+H]+ 43!           | 95  |
| 1324562  | 1634299  | [1155][M]+           | 169 |
| 1016643  | 540959.9 | [651][M+1]2+         | 18  |
| 210944   | 1516793  |                      | 83  |
| 6551.844 | 278319.2 |                      | 178 |
| 358774.7 | 1179089  | [1203][M+1]+         | 2   |
| 1348957  | 609559   | [1480][M+2]+         | 243 |
| 586382.4 | 571421.3 |                      | 212 |
| 588393.7 | 1392225  |                      | 71  |
| 2989054  | 3212180  | [511][M]+ [M+H+NH3   | 29  |
| 1006293  | 3977294  | [1486][M]+ [M+H+HCC  | 11  |
| 4049176  | 3439777  | [M+K+NH3             | 360 |
| 4729725  | 4105360  | [166][M]+            | 52  |
| 53138967 | 1.37E+08 | [206][M]+ [M+K]+ 25! | 49  |
| 123741.1 | 306405.1 |                      | 91  |
| 394922.8 | 98359.62 | [1371][M+1]+         | 217 |
| 4063303  | 5898289  |                      | 304 |
| 2649051  | 2555214  | [149][M+2]2+         | 60  |
| 335312.7 | 235075.9 |                      | 73  |
| 171484.5 | 2228467  | [1269][M+1]+         | 172 |
| 2043409  | 1876075  | [25][M]+             | 96  |
| 1085367  | 1019882  | [M+K]+ 21!           | 252 |
| 60502.03 | 143851.8 | [1187][M+1]+         | 284 |
| 488333.4 | 125128.1 |                      | 92  |
| 743185.1 | 932114.9 | [M+Na]+ 4!           | 143 |
| 236546.4 | 999682.2 | [115][M+3]2+         | 2   |
| 615566   | 764343.4 |                      | 19  |
| 1627755  | 5128899  | [774][M+1]+          | 79  |
| 1352373  | 299453.9 | [M+H+HCC             | 217 |
| 58829.41 | 127308.3 | [357][M+2]+          | 73  |
| 6166631  | 20343233 | [925][M]+ [M+Na]+ 4! | 172 |
| 16548439 | 4736254  |                      | 2   |
| 1003817  | 789776.7 | [484][M+1]+          | 297 |
| 879936.3 | 916323.6 | [M+H]+ 40!           | 272 |
| 669849.5 | 1227986  | [M+2K]2+ 3           | 171 |
| 110876.3 | 2168124  | [M+H]+ 59!           | 95  |
| 1079818  | 2139356  |                      | 22  |
| 2892752  | 8849534  | [269][M+2]+          | 103 |
| 396823.6 | 300344.8 | [M+H]+ 69!           | 116 |
| 4461970  | 4993547  | [174][M]+ [M+H]+ 28! | 221 |
| 298571.8 | 286525.6 |                      | 60  |

|          |          |                       |     |
|----------|----------|-----------------------|-----|
| 623758.7 | 439939.3 | [208][M+1]+           | 324 |
| 46820959 | 1.37E+08 | [106][M]+ [M+K]+ 215  | 49  |
| 17013143 | 26688352 | [238][M]+             | 61  |
| 1366802  | 545470.9 | [346][M+1]+           | 16  |
| 3.1E+08  | 5.58E+08 | [621][M]+             | 9   |
| 897232.6 | 537206.4 |                       | 228 |
| 4472590  | 5911876  | [1111][M]+ [M+Na]+ 54 | 13  |
| 8215951  | 11963847 | [240][M+1]+           | 106 |
| 1372446  | 1486763  | [1239][M]+            | 364 |
| 480455.8 | 601290.6 | [M+H]+ 164            | 78  |
| 54324.65 | 81953.51 | [M+H+CF3O]            | 279 |
| 969147.5 | 937199.7 | [M+2H]2+ 4            | 4   |
| 3015346  | 6830417  | [1280][M]+            | 28  |
| 1655056  | 1680516  | [M+H]+ 190            | 104 |
| 137943.9 | 167048.7 | [632][M+1]+           | 217 |
| 0        | 328608.4 |                       | 199 |
| 2530476  | 8778422  |                       | 79  |
| 1080791  | 697422.2 | [809][M+2]+           | 107 |
| 276946.4 | 64522.98 |                       | 96  |
| 415466.9 | 222704.4 | [M+Na]+ 84            | 29  |
| 3026161  | 2732851  | [701][M]+ [M+H-H2O]   | 172 |
| 2232843  | 2338169  | [176][M]+             | 160 |
| 350866   | 211858.1 | [M+H-H2O]             | 29  |
| 101880.4 | 280251.5 | [280][M+2]+           | 169 |
| 0        | 123175   |                       | 359 |
| 118183.3 | 646844.6 |                       | 336 |
| 60037.33 | 401803.7 | [M+Na]+ 24            | 199 |
| 715447.7 | 504645.3 | [M+Na]+ 34            | 180 |
| 747885.7 | 567520.8 | [1000][M+1]+          | 212 |
| 120844.8 | 243793.2 | [252][M+2]+           | 114 |
| 902983.6 | 608180.5 |                       | 217 |
| 5437753  | 2630895  | [243][M]+             | 61  |
| 3092415  | 3532584  | [2][M]+               | 41  |
| 487756   | 1857306  | [M+H-H2O]             | 55  |
| 1394090  | 7395689  |                       | 1   |
| 1971146  | 1487244  | [463][M]+ [M+K+HCO    | 17  |
| 1201577  | 1644378  |                       | 176 |
| 875902.6 | 402906.7 | [1370][M]+ [M+Na]+ 64 | 25  |
| 4879741  | 5028201  | [794][M+1]+           | 151 |
| 5583391  | 3144389  | [328][M]+             | 292 |
| 1920979  | 2443193  | [M+H]+ 304            | 49  |
| 4109932  | 43029588 |                       | 54  |
| 3048484  | 10201364 |                       | 264 |
| 589155.9 | 334531.2 | [642][M+1]+           | 172 |
| 522404.5 | 452423.1 |                       | 473 |
| 2953079  | 11644261 | [64][M]+ [M+Na]+ 20   | 49  |
| 1343963  | 12472614 | [1124][M+1]+          | 69  |

|          |          |                       |     |
|----------|----------|-----------------------|-----|
| 642506.9 | 646986.4 | [M+Na]+ 4:            | 264 |
| 461261.3 | 597868.5 |                       | 61  |
| 1307508  | 1781458  | [1213][M]+            | 78  |
| 3115604  | 2173633  |                       | 62  |
| 370921.6 | 2634286  |                       | 110 |
| 723792.8 | 508163.5 | [1173][M+3]+          | 25  |
| 518528.9 | 447163.1 |                       | 373 |
| 35132071 | 29911547 | [648][M]+             | 20  |
| 1567724  | 2183906  |                       | 369 |
| 1034299  | 182619   | [2M+2Na+:             | 121 |
| 553564.4 | 539152.8 | [1195][M+2]2+         | 29  |
| 29678682 | 21637571 |                       | 114 |
| 1.57E+08 | 1.37E+08 | [1114][M]+ [M+Na]+ 5: | 47  |
| 20848418 | 17819620 | [1042][M+1]+          | 77  |
| 373928.3 | 347056.3 | [1440][M]+            | 340 |
| 747871.9 | 758136.2 | [437][M]+             | 324 |
| 490208.7 | 1028670  | [M+K+NH3              | 60  |
| 47847202 | 31054887 | [930][M]+             | 175 |
| 205527.1 | 114948.9 |                       | 136 |
| 220924.3 | 405960.4 | [264][M+1]+           | 22  |
| 1331029  | 5670509  | [1332][M]+ [2M+Na]+ : | 95  |
| 99949.15 | 1371874  | [M+H]+ 86:            | 95  |
| 1552138  | 3262266  | [105][M]+ [M+H]+ 25:  | 230 |
| 709171.2 | 605239.3 | [M+2H-NH:             | 257 |
| 97673.1  | 252268   |                       | 397 |
| 378501.6 | 301413.5 |                       | 62  |
| 2437205  | 779012.1 | [1426][M]+            | 45  |
| 121849.4 | 34588.52 |                       | 382 |
| 362020.6 | 1668367  | [M+H-CH2]             | 104 |
| 430510.5 | 745131.9 |                       | 107 |
| 713780.2 | 390410.2 | [M+2H-NH:             | 189 |
| 646971   | 437214.3 |                       | 119 |
| 1209115  | 2226865  | [M+2H-CO]             | 87  |
| 9713214  | 3064766  |                       | 1   |
| 772232.8 | 3537690  | [486][M+1]+           | 95  |
| 906283.4 | 3884993  |                       | 104 |
| 81827.27 | 325066.2 |                       | 49  |
| 32789.66 | 131347.9 |                       | 149 |
| 409662.9 | 368338.2 | [49][M+1]+            | 27  |
| 297612.5 | 275787.8 | [M+K+HCO              | 119 |
| 322391.1 | 399415.6 |                       | 175 |
| 1805307  | 3651222  | [723][M]+             | 342 |
| 2.44E+08 | 1.78E+08 | [1108][M]+ [M+H]+ 56: | 29  |
| 432353.6 | 207846.5 |                       | 216 |
| 69467154 | 1.49E+08 |                       | 9   |
| 69495234 | 61120580 | [1042][M]+            | 77  |
| 9799016  | 12891409 | [544][M+2]+           | 19  |



|          |          |                                               |     |
|----------|----------|-----------------------------------------------|-----|
| 139872.1 | 192996   | [413][M+2] <sup>2+</sup>                      | 138 |
| 466707.5 | 418968.5 |                                               | 221 |
| 344421.8 | 122420.6 |                                               | 134 |
| 4723819  | 15636619 | [3M+2H] <sup>2+</sup>                         | 11  |
| 362549.2 | 1507181  |                                               | 136 |
| 1266774  | 1418440  | [154][M+1] <sup>+</sup>                       | 41  |
| 139960.6 | 435165.2 |                                               | 104 |
| 754339.2 | 550534.5 | [M+H+NH <sub>3</sub> ]                        | 214 |
| 968900   | 17740666 |                                               | 184 |
| 232834.5 | 106066.5 | [M+Na] <sup>+</sup> 2'                        | 119 |
| 74427.02 | 152017.1 |                                               | 46  |
| 1514108  | 6484262  | [82][M+2] <sup>+</sup>                        | 55  |
| 7399538  | 12007763 | [142][M] <sup>+</sup>                         | 290 |
| 693649.1 | 1207652  |                                               | 86  |
| 262227.8 | 987120.9 | [872][M+1] <sup>+</sup>                       | 2   |
| 626201.5 | 1032024  |                                               | 16  |
| 399902.8 | 507325.5 |                                               | 162 |
| 2121958  | 659175.4 | [1112][M+1] <sup>+</sup>                      | 133 |
| 802493.3 | 1734517  | [M+H+HCC]                                     | 4   |
| 1096459  | 538117.4 | [291][M+1] <sup>+</sup>                       | 293 |
| 996767   | 2856017  |                                               | 264 |
| 557546.4 | 2154815  | [815][M] <sup>+</sup>                         | 182 |
| 2296352  | 2406681  |                                               | 90  |
| 737470.5 | 457017.6 |                                               | 48  |
| 339568.6 | 390487.3 | [M+K] <sup>+</sup> 49'                        | 119 |
| 15512582 | 18363316 | [262][M] <sup>+</sup>                         | 280 |
| 2702605  | 4829592  | [M+H] <sup>+</sup> 28'                        | 284 |
| 5816507  | 7798214  | [98][M+1] <sup>+</sup>                        | 105 |
| 7275192  | 4613039  |                                               | 62  |
| 124077.4 | 305304.3 |                                               | 119 |
| 890752.7 | 794456.6 |                                               | 371 |
| 22524053 | 18787000 | [1045][M+1] <sup>+</sup>                      | 17  |
| 469350.7 | 564739.9 |                                               | 304 |
| 525147   | 808623.9 |                                               | 440 |
| 451640.7 | 378262.8 | [M+H+NH <sub>3</sub> ]                        | 288 |
| 4703325  | 4.68E+09 | [M+Na+HC]                                     | 4   |
| 23339396 | 18567106 | [1248][M] <sup>+</sup> [M+H] <sup>+</sup> 63' | 34  |
| 123638.9 | 917001   | [1118][M+1] <sup>+</sup>                      | 103 |
| 679475.3 | 11658082 | [1009][M] <sup>+</sup> [M+Na] <sup>+</sup> 5' | 110 |
| 9757043  | 1240910  |                                               | 253 |
| 1965689  | 2060563  |                                               | 215 |
| 2893383  | 5700052  | [1533][M+1] <sup>+</sup>                      | 54  |
| 274956.9 | 668426.9 | [M+K+NaCl]                                    | 104 |
| 8035155  | 3664386  |                                               | 25  |
| 101283.2 | 149200.6 | [M+Na] <sup>+</sup> 2'                        | 289 |
| 337737.5 | 412454.5 |                                               | 32  |
| 10328067 | 13078867 |                                               | 181 |

|          |          |                      |     |
|----------|----------|----------------------|-----|
| 219148.6 | 810806.1 |                      | 264 |
| 652740.3 | 895454.6 |                      | 31  |
| 7056580  | 5812641  | [1248][M+1]+         | 34  |
| 257311.4 | 114985.1 | [1387][M+1]+         | 333 |
| 45609.98 | 182210   |                      | 62  |
| 240942.2 | 294530.9 | [M+H]+ 22            | 268 |
| 556243.4 | 713713.9 | [M+Na]+ 4            | 101 |
| 374294   | 321627.7 |                      | 32  |
| 792889.3 | 1063329  |                      | 4   |
| 69014.43 | 186212.4 |                      | 285 |
| 8117645  | 6677470  | [453][M+1]+          | 1   |
| 4788208  | 3702774  | [1500][M]+           | 52  |
| 151322.5 | 320396.9 | [1405][M+1]+         | 100 |
| 727516.1 | 599535.7 |                      | 202 |
| 264439.8 | 65307.15 | [1298][M+1]+         | 223 |
| 236775.2 | 162252   | [682][M+1]+          | 75  |
| 221162.3 | 109521.3 | [463][M+1]+          | 17  |
| 53642.24 | 122090.8 | [969][M+1]3+         | 206 |
| 191363.4 | 340606.5 | [539][M+1]+          | 217 |
| 541301.8 | 1215702  |                      | 298 |
| 632259.3 | 1489657  |                      | 452 |
| 1918310  | 628504.5 | [709][M+1]+          | 33  |
| 759147.6 | 490451.9 | [928][M]+            | 32  |
| 37485582 | 16480664 | [813][M]+            | 123 |
| 283556   | 708338.8 | [2M+Na+3I            | 55  |
| 868817.4 | 2.67E+08 | [453][M]+            | 1   |
| 313275.9 | 342689.9 |                      | 22  |
| 225239.3 | 206955   |                      | 61  |
| 103939.4 | 57291.36 | [M+Na]+ 8:           | 138 |
| 148141.7 | 579932.5 | [M+K+HCO             | 55  |
| 638594.5 | 2553766  |                      | 13  |
| 3834519  | 3308345  | [452][M]+ [M+Na]+ 3: | 78  |
| 751242.2 | 4912638  |                      | 1   |
| 14803696 | 7711003  |                      | 25  |
| 616811.6 | 1092678  |                      | 233 |
| 314758.9 | 1368631  | [M+H-C2H4            | 49  |
| 332762.5 | 521723.9 | [877][M+1]+          | 341 |
| 724353.4 | 318119.7 | [3M+2H]2+            | 64  |
| 350431.4 | 237748.2 | [M+H-H2O]            | 143 |
| 375995.1 | 2033459  | [631][M+2]+          | 83  |
| 414319.4 | 441235   | [M+H]+ 24:           | 104 |
| 811299.1 | 1029966  | [1547][M]+           | 116 |
| 665049.7 | 810873.8 |                      | 241 |
| 1151276  | 1255753  |                      | 227 |
| 2911364  | 1371952  | [1051][M]2+          | 25  |
| 2217387  | 2730685  | [1035][M+1]+         | 2   |
| 1552599  | 1191581  |                      | 366 |

|          |          |                       |     |
|----------|----------|-----------------------|-----|
| 1662587  | 347609   | [1017][M]+            | 318 |
| 76499567 | 78928487 |                       | 46  |
| 9455422  | 9014633  | [1031][M+1]+          | 138 |
| 121119.6 | 574598.2 | [M+H-H2O]             | 116 |
| 404728   | 365902.7 |                       | 249 |
| 6401184  | 50136189 | [1124][M]+            | 69  |
| 294637.7 | 98187.93 | [M+K+NaCl]            | 29  |
| 132981.5 | 1233031  |                       | 97  |
| 30732917 | 32215022 | [1136][M]+ [2M+Na]+ : | 17  |
| 54653.22 | 1113055  | [M+K]+ 49%            | 110 |
| 267281.2 | 2200542  | [1177][M+2]+          | 95  |
| 1109197  | 1525695  | [1160][M]2+           | 70  |
| 4228154  | 14542551 | [106][M+1]+           | 49  |
| 139937.7 | 838272.3 | [657][M+2]+           | 79  |
| 9953082  | 13825938 |                       | 263 |
| 2487983  | 4138952  |                       | 101 |
| 1236632  | 1344064  |                       | 185 |
| 4917416  | 4379213  | [208][M]+             | 324 |
| 820348.8 | 732228.2 | [677][M]2+            | 46  |
| 1002090  | 359835.1 | [1426][M+1]+          | 45  |
| 1999341  | 1114996  | [918][M+1]+           | 76  |
| 857855.7 | 1012159  | [411][M]2+ [M+2H]2+ ( | 116 |
| 767030.2 | 1163129  |                       | 207 |
| 252119.2 | 171540.5 | [M+H+NH3              | 119 |
| 156943.9 | 78681.11 |                       | 297 |
| 905921.6 | 1023023  | [M+2H-CO]             | 286 |
| 86111.33 | 984931.6 |                       | 172 |
| 78218.89 | 220921.6 |                       | 235 |
| 1058018  | 2298144  |                       | 116 |
| 85299.17 | 242157.4 |                       | 152 |
| 236596.4 | 143607.6 | [M+K+HCO              | 83  |
| 621178.2 | 343292.6 |                       | 207 |
| 8465.92  | 210337.9 | [M+H]+ 65%            | 83  |
| 255406.4 | 483012   | [74][M+1]+            | 208 |
| 87754.31 | 87213.88 |                       | 118 |
| 23638866 | 18045744 | [982][M+1]+           | 120 |
| 10600410 | 11008795 | [398][M]+ [M+H-NH3]   | 250 |
| 3773225  | 5249116  |                       | 273 |
| 4082778  | 2920290  | [M+K]+ 22%            | 143 |
| 7488314  | 4255934  | [1147][M]+ [M+Na]+ 5% | 29  |
| 384652.8 | 422614.2 | [1290][M]+ [M+H-C3H7] | 34  |
| 398347   | 214835.3 |                       | 29  |
| 147313.3 | 177759.2 | [314][M+1]+           | 103 |
| 257189.3 | 459768   |                       | 165 |
| 5062304  | 3692984  | [M+H]+ 40%            | 100 |
| 297432.3 | 138076.4 | [460][M+3]+           | 29  |
| 64817.92 | 153671.3 |                       | 67  |

|          |          |                      |     |
|----------|----------|----------------------|-----|
| 250977.2 | 139372.1 |                      | 107 |
| 509274.2 | 230361.6 | [1128][M+1]2+        | 25  |
| 3855420  | 4546639  | [514][M+1]+          | 16  |
| 79592.33 | 819703.1 | [M+Na]+ 4            | 172 |
| 1351566  | 2161974  | [253][M+4]+          | 119 |
| 3985532  | 2014941  | [806][M]+ [M+H+NH3   | 172 |
| 763746.9 | 65311.07 |                      | 226 |
| 5527293  | 3736012  |                      | 97  |
| 457971.6 | 949428.8 | [224][M+1]+          | 304 |
| 329251.4 | 590343.8 | [M+K+NH3             | 160 |
| 1613893  | 2362491  |                      | 127 |
| 3228398  | 2901446  | [M+H]+ 20            | 90  |
| 10903290 | 4401559  | [813][M+1]+          | 123 |
| 1993335  | 1762511  |                      | 220 |
| 546957.7 | 956653.1 | [M+H]+ 43            | 119 |
| 471048   | 651577.9 | [M+H]+ 31            | 60  |
| 954560.3 | 293396.5 |                      | 111 |
| 130882.3 | 126357.8 |                      | 81  |
| 3633863  | 10443106 | [800][M+1]2+         | 54  |
| 24512247 | 36915253 | [178][M]+ [M+K+NH3   | 127 |
| 602178.1 | 1774594  | [1266][M+3]+         | 10  |
| 279721.4 | 393399.1 | [1140][M+1]+         | 119 |
| 353936.4 | 417857.8 | [M+Na+HC             | 29  |
| 2758483  | 2613232  |                      | 364 |
| 1469683  | 1513359  |                      | 355 |
| 77086523 | 64235395 | [1045][M]+ [M+H]+ 54 | 17  |
| 1421105  | 1116596  |                      | 75  |
| 962361.9 | 1558770  |                      | 332 |
| 346563.1 | 744084.8 | [1514][M]+           | 200 |
| 134681.3 | 169729.3 | [1265][M+1]2+        | 202 |
| 2612645  | 2425098  | [858][M]+ [M+H-CH3]  | 281 |
| 704493.8 | 303710.3 | [978][M+1]2+         | 60  |
| 77028.34 | 1336276  |                      | 208 |
| 224608.3 | 376917.3 |                      | 164 |
| 23703.39 | 1106343  |                      | 110 |
| 6166066  | 16927457 | [206][M+1]+          | 49  |
| 189935   | 1196340  |                      | 272 |
| 76432.75 | 207711.4 |                      | 60  |
| 100759.1 | 454923.9 | [M+H]+ 27            | 49  |
| 939798.7 | 1534205  | [884][M]+ [M+K]+ 45  | 160 |
| 358071.6 | 511853.3 |                      | 372 |
| 11020999 | 9060027  | [399][M]+ [M+Na]+ 3  | 104 |
| 63890.43 | 155473.2 | [M+K]+ 97            | 23  |
| 44822311 | 1.42E+08 |                      | 50  |
| 355070.8 | 526836.5 | [1534][M+1]+         | 23  |
| 610645.8 | 1914044  |                      | 171 |
| 885452   | 1235452  | [841][M+1]+          | 127 |

|          |          |                      |     |
|----------|----------|----------------------|-----|
| 1104217  | 1645415  |                      | 11  |
| 41768.41 | 377248.9 |                      | 113 |
| 619698.7 | 510963.1 | [897][M]2+           | 23  |
| 303445.3 | 280618.5 |                      | 217 |
| 639955.9 | 519907   | [3M+3Na+]            | 254 |
| 141543   | 907224.4 | [315][M+1]+          | 186 |
| 108656.3 | 189919.2 | [1141][M+1]+         | 29  |
| 314657.6 | 406588.9 | [M+H+NH3]            | 79  |
| 246277.4 | 458928.2 |                      | 326 |
| 457785.5 | 352545.2 | [1153][M+1]+         | 412 |
| 673308.7 | 1849150  | [118][M]2+           | 55  |
| 322666.5 | 627884.4 | [626][M]+            | 387 |
| 213819.3 | 391517.3 | [625][M+1]+          | 169 |
| 325244.9 | 199283.1 |                      | 18  |
| 15714176 | 325299   | [826][M]+            | 62  |
| 1095545  | 621827.2 |                      | 266 |
| 1329075  | 2468935  | [925][M+2]+          | 172 |
| 573757.3 | 715679.8 |                      | 218 |
| 978797.6 | 1055449  | [574][M]+            | 84  |
| 342637.8 | 709580.7 |                      | 119 |
| 61426.03 | 1683136  | [1463][M+1]+         | 95  |
| 517024.8 | 441413.9 |                      | 29  |
| 397243.2 | 881416.2 | [M+H-H2O]            | 230 |
| 126335.2 | 412120.8 | [M+K]+ 69            | 29  |
| 79739.53 | 331390   |                      | 292 |
| 258438.4 | 882758.6 | [425][M]2+           | 164 |
| 503046   | 531472.4 |                      | 3   |
| 2103643  | 11450098 | [538][M]+ [M+Na]+ 30 | 55  |
| 419320.4 | 781304.7 | [925][M+4]+          | 172 |
| 1423943  | 6737060  | [634][M+1]+          | 95  |
| 130843.7 | 134911.7 |                      | 20  |
| 2942847  | 1170774  | [M+2Na]2+            | 143 |
| 432923.6 | 458856.9 | [304][M+1]+          | 41  |
| 529509.1 | 364677.4 | [M+K+NH3]            | 228 |
| 430874.3 | 446027.7 | [1268][M]+ [M+Na]+ 6 | 34  |
| 364000.7 | 487594   |                      | 110 |
| 1650345  | 2297653  | [921][M]+ [M+H-C4H8] | 11  |
| 510975.5 | 1529824  |                      | 209 |
| 51091.17 | 7604.657 |                      | 123 |
| 3020814  | 7770624  | [95][M]+             | 290 |
| 16130985 | 14749600 | [687][M]+ [M+H]+ 42  | 90  |
| 99615.66 | 486890.4 | [37][M+1]2+          | 8   |
| 12524102 | 7425219  | [930][M+1]+          | 175 |
| 100070.5 | 140326.1 | [79][M+1]+           | 218 |
| 1541834  | 454697.9 |                      | 277 |
| 143619.5 | 948383.3 |                      | 104 |
| 857966.2 | 3161785  |                      | 1   |

|          |          |                      |     |
|----------|----------|----------------------|-----|
| 1905102  | 3774937  |                      | 230 |
| 13964721 | 17258940 | [649][M]+            | 37  |
| 1151276  | 239762.8 | [M+Na]+ 4:           | 33  |
| 758183.9 | 1068183  |                      | 172 |
| 145416.3 | 1086936  | [M+H]+ 39:           | 178 |
| 150658.8 | 201956.6 | [528][M+1]+          | 109 |
| 179225.4 | 498287.3 | [M+H]+ 20:           | 103 |
| 251981   | 117973.9 | [M+Na]+ 4:           | 64  |
| 302519.6 | 227230.7 |                      | 151 |
| 136263.8 | 125643.9 |                      | 233 |
| 2253120  | 1420487  | [1170][M]2+          | 29  |
| 3951620  | 5805349  | [M+H-C6H:            | 88  |
| 1711298  | 2651680  |                      | 19  |
| 3707203  | 4511796  | [512][M]+ [M+H+NH3   | 244 |
| 44719.18 | 560712.1 | [M+K]+ 46:           | 127 |
| 375009.3 | 1511502  |                      | 390 |
| 940986.1 | 802926.2 |                      | 11  |
| 5108971  | 2719277  |                      | 100 |
| 84059.11 | 96214.13 | [87][M+1]+           | 60  |
| 215021.2 | 150938.4 | [316][M+1]+          | 19  |
| 1.23E+08 | 3968449  |                      | 1   |
| 193428.9 | 332647.6 |                      | 106 |
| 543802   | 356265   |                      | 216 |
| 556467.1 | 2331175  | [219][M+1]+          | 49  |
| 283696.4 | 632585.8 |                      | 26  |
| 1.35E+09 | 1.67E+09 | [764][M+1]+          | 2   |
| 2759063  | 4953995  | [322][M]+ [M+K]+ 28: | 116 |
| 1205760  | 2544711  | [738][M]+            | 55  |
| 156607   | 814812.5 |                      | 356 |
| 2624862  | 8251196  | [774][M+2]+          | 79  |
| 595915.5 | 850294.5 |                      | 54  |
| 361669.7 | 642241.6 | [M+2Na]2+            | 4   |
| 217181.9 | 122791.1 | [711][M+1]+          | 286 |
| 61209.03 | 143815.2 |                      | 343 |
| 920599   | 1779094  |                      | 252 |
| 1099063  | 801770.5 |                      | 216 |
| 699792.3 | 554253.5 | [2M+Na+2I            | 52  |
| 83387.46 | 291878.3 | [M+K+NH3             | 133 |
| 93002791 | 77010599 | [189][M]+            | 61  |
| 127517.8 | 318398.1 | [M+K]+ 24:           | 138 |
| 681607.4 | 873005.7 |                      | 22  |
| 20579757 | 6941304  |                      | 2   |
| 3381658  | 2303165  | [205][M]3+           | 62  |
| 3475415  | 3163378  | [698][M+2]+          | 52  |
| 263824.9 | 193281.1 | [584][M+1]+          | 23  |
| 2562896  | 2459092  | [29][M+1]+           | 83  |
| 67016.01 | 97682.05 |                      | 137 |

|          |          |                       |     |
|----------|----------|-----------------------|-----|
| 227947.8 | 213934.5 |                       | 459 |
| 866367.2 | 7642114  | [416][M+1]2+          | 1   |
| 1477797  | 1648191  |                       | 90  |
| 47596.44 | 933415.9 | [1009][M+2]+          | 110 |
| 8313582  | 13993150 | [337][M]+             | 77  |
| 63606.6  | 647542.3 |                       | 94  |
| 1188737  | 1391700  | [1063][M+1]+          | 104 |
| 174118.6 | 223604.4 |                       | 41  |
| 620193.8 | 652551.2 |                       | 94  |
| 33692303 | 30977420 |                       | 41  |
| 126608.9 | 0        | [M+K]+ 734            | 18  |
| 777872.8 | 456113.5 | [M+K]+ 602            | 18  |
| 309675.4 | 279049.6 |                       | 111 |
| 9080522  | 5990303  | [420][M]2+            | 2   |
| 6242962  | 5676993  | [1117][M+1]+          | 321 |
| 189285   | 352287.2 | [M+3H-H2O]            | 33  |
| 499917.8 | 284944.4 |                       | 416 |
| 2396262  | 909228.7 | [M+H]+ 364            | 4   |
| 918679.4 | 1136617  |                       | 6   |
| 119983.7 | 240656.5 | [61][M+1]+            | 116 |
| 433285.2 | 414676.8 | [648][M+2]+           | 20  |
| 156147.5 | 164045.2 | [670][M+2]+           | 143 |
| 389961.4 | 241477.3 | [1180][M+1]+          | 143 |
| 5125490  | 1434075  | [587][M]2+ [M+2H-H2O] | 243 |
| 182502.6 | 487585.7 | [6][M+1]+             | 279 |
| 211087.1 | 530397   | [610][M+1]+           | 160 |
| 12744    | 195805.9 | [3M+2H]2+             | 55  |
| 550454.5 | 1202602  |                       | 227 |
| 2175954  | 1914810  | [895][M+2]+           | 84  |
| 129478   | 743269.6 | [424][M+1]+           | 178 |
| 53044.67 | 175407.4 | [377][M+1]+           | 81  |
| 251717.4 | 33783.75 | [M+H]+ 544            | 13  |
| 1011805  | 1166273  | [641][M]+ [M+H+NH3]   | 104 |
| 2138698  | 445571.8 | [321][M+1]+           | 134 |
| 342497.6 | 322501.7 | [M+Na]+ 34            | 199 |
| 550987.8 | 476276   |                       | 119 |
| 757267.8 | 879392.2 |                       | 90  |
| 759175.7 | 902691.4 | [M+H-C4H8]            | 31  |
| 1258415  | 133573.1 |                       | 355 |
| 1073398  | 2951042  |                       | 4   |
| 643826.1 | 852512.7 |                       | 52  |
| 81158.61 | 128002   | [M+K+NaCl]            | 49  |
| 6643480  | 3481537  | [291][M]+             | 293 |
| 979504.7 | 1590750  | [773][M]+ [M+K]+ 416  | 276 |
| 183976.5 | 362040.3 | [M+H-COCl]            | 221 |
| 1820704  | 1525468  | [M+Na]+ 14            | 144 |
| 10328913 | 32340203 |                       | 1   |

|          |          |                     |     |
|----------|----------|---------------------|-----|
| 490758.1 | 603599.4 |                     | 129 |
| 504953   | 1014367  |                     | 259 |
| 2262841  | 1958679  | [1500][M+1]+        | 52  |
| 65080.52 | 5218.063 |                     | 449 |
| 1209107  | 669518   | [1173][M+4]+        | 25  |
| 803542   | 188560.3 |                     | 309 |
| 14982830 | 48333536 | [379][M]+           | 244 |
| 185602.7 | 131782.7 | [195][M+1]2+        | 62  |
| 31195042 | 32619085 | [893][M]+ [M+Na]+ 4 | 169 |
| 2144038  | 6506027  | [197][M]+           | 49  |
| 188244.7 | 243203.4 | [194][M+2]+         | 114 |
| 481479.2 | 258949.4 |                     | 81  |
| 354018.9 | 426285   |                     | 381 |
| 265510.4 | 391660.8 |                     | 264 |
| 63028.89 | 596166.5 | [M+K]+ 37           | 83  |
| 37910.34 | 0        |                     | 123 |
| 174821.8 | 1518656  | [M+Na]+ 30          | 178 |
| 5247100  | 7105252  | [1303][M]+          | 304 |
| 1.94E+08 | 5.53E+08 |                     | 1   |
| 357907.7 | 556890.5 | [727][M+2]+         | 143 |
| 263981.7 | 156673   |                     | 213 |
| 10476574 | 27941458 | [763][M+2]+         | 95  |
| 821348.3 | 795877.6 |                     | 232 |
| 351242.8 | 296615.2 | [1155][M+1]+        | 169 |
| 1598222  | 1241281  | [M+K]+ 27           | 217 |
| 1027861  | 916511.9 |                     | 49  |
| 142095.1 | 297550.8 | [M+K+HCO            | 169 |
| 11672669 | 48139139 | [475][M+5]+         | 1   |
| 2087076  | 1869293  | [825][M]+ [M+H]+ 47 | 75  |
| 836489.6 | 2087320  | [M+K]+ 45           | 11  |
| 1838808  | 5288586  | [478][M+3]+         | 1   |
| 1082925  | 1313433  |                     | 244 |
| 136198.9 | 340134.4 | [588][M+1]+         | 116 |
| 4.61E+08 | 5.79E+08 | [273][M]+           | 22  |
| 47281683 | 56286806 | [229][M]+ [M+Na]+ 2 | 17  |
| 669541   | 758555.1 |                     | 22  |
| 114304.9 | 107343.8 | [1290][M+1]+        | 34  |
| 651415.8 | 546984.5 | [2M+Na+K]           | 49  |
| 9441440  | 35004161 |                     | 11  |
| 47439.72 | 330747.2 |                     | 154 |
| 2177879  | 9167683  | [164][M+4]+         | 55  |
| 400588.9 | 2412380  | [1332][M+1]+        | 95  |
| 1235999  | 303011   |                     | 92  |
| 489605.8 | 555681.6 | [M+2H]2+ !          | 128 |
| 381726.6 | 111389.2 | [1425][M+2]+        | 198 |
| 114852.9 | 129531.8 |                     | 255 |
| 995604.2 | 6895154  | [315][M]+ [M+H]+ 32 | 186 |



|          |          |                       |     |
|----------|----------|-----------------------|-----|
| 265770.6 | 1969804  |                       | 152 |
| 126240.3 | 2910294  |                       | 79  |
| 172075.4 | 1240786  | [M+H-C6H:             | 110 |
| 3578562  | 2344124  | [1464][M+1]+          | 278 |
| 83203.13 | 814721.1 |                       | 104 |
| 98859.45 | 1339930  | [736][M+1]+           | 55  |
| 184686.6 | 56681.41 |                       | 467 |
| 536029.7 | 1286050  | [1378][M]+ [M+Na]+ 6! | 172 |
| 79713.39 | 2024863  | [1009][M+1]+          | 110 |
| 1502228  | 1252714  | [196][M+1]+           | 81  |
| 161973.2 | 732823.8 |                       | 110 |
| 2475922  | 2294378  | [706][M]2+ [M+2K]2+ 7 | 243 |
| 41956022 | 58200947 | [98][M]+              | 105 |
| 368814.2 | 268524.8 | [M+H]+ 49!            | 107 |
| 106619.3 | 66740.36 | [25][M+1]+            | 96  |
| 393844   | 264021.1 | [M+2K-H]+             | 95  |
| 1593308  | 1933578  | [M+K]+ 28!            | 90  |
| 678004.3 | 573320.2 |                       | 178 |
| 432794.5 | 3585824  |                       | 315 |
| 329757.6 | 475503.8 | [M+K]+ 51!            | 11  |
| 32228368 | 32624063 | [1031][M]+ [M+Na]+ 5! | 138 |
| 2225941  | 1894461  | [399][M+1]+           | 104 |
| 2801081  | 3346421  | [262][M+1]+           | 280 |
| 334557.3 | 342637.9 |                       | 341 |
| 6774033  | 7966370  | [229][M+1]+           | 17  |
| 670631.8 | 1243026  | [M+H-C3H:             | 4   |
| 44671959 | 72753640 | [543][M]+ [M+Na]+ 3!  | 11  |
| 54598.3  | 169321.6 | [470][M+1]+           | 415 |
| 1225755  | 1814629  | [390][M+1]+           | 78  |
| 260686.2 | 201728.5 | [527][M+1]+           | 238 |
| 25839461 | 8020285  | [1194][M]+ [M+Na]+ 5! | 133 |
| 336592.9 | 287672.2 |                       | 278 |
| 505760.7 | 616071   |                       | 403 |
| 223352.4 | 231906.2 | [M+K+HCO              | 284 |
| 256365.5 | 260822.1 | [738][M+1]+           | 55  |
| 374556.1 | 854614.1 | [702][M+4]+           | 26  |
| 999081   | 1358644  | [M+Na]+ 2!            | 245 |
| 257564   | 234825.9 | [274][M+1]2+          | 118 |
| 25847149 | 25098028 | [111][M]+ [M+H-C4H:   | 83  |
| 105747.6 | 267432.4 | [M+H-CH3]             | 104 |
| 689862.6 | 1103946  | [781][M+2]+           | 284 |
| 549775.8 | 503960.4 |                       | 29  |
| 3811175  | 2769266  | [M+H-H2O]             | 288 |
| 3377461  | 4600485  | [225][M]2+            | 62  |
| 259560.7 | 1053733  | [120][M+1]+           | 254 |
| 83171.22 | 729298.7 | [M+K+HCO              | 95  |
| 51577.08 | 373093.4 | [2M+H+Na              | 83  |

|          |          |                      |     |
|----------|----------|----------------------|-----|
| 1753292  | 1485327  |                      | 123 |
| 60627009 | 46836629 | [809][M]+ [M+Na]+ 4  | 107 |
| 624456.1 | 482533.3 |                      | 62  |
| 156190.4 | 255615.5 | [3M+H+Na             | 116 |
| 427942.3 | 4106562  | [M+K+CF3C            | 49  |
| 1051764  | 1384538  | [528][M]+            | 109 |
| 91412.59 | 2697577  | [866][M+2]+          | 55  |
| 2042835  | 5747193  | [M+2Na-H]            | 27  |
| 63586.11 | 450628.7 |                      | 414 |
| 1249541  | 1646906  | [527][M]+            | 238 |
| 26768336 | 46131469 | [1244][M]+           | 12  |
| 749321.9 | 619283.1 |                      | 201 |
| 589443.6 | 392062.6 | [1500][M+2]+         | 52  |
| 115886.8 | 76780.83 | [M+Na]+ 5!           | 205 |
| 6482389  | 10335081 | [224][M]+ [M+H]+ 29! | 304 |
| 1831064  | 2646095  | [1303][M+1]+         | 304 |
| 2369245  | 852153.3 | [1046][M+2]+         | 40  |
| 6.27E+08 | 1.72E+09 | [836][M+1]+          | 3   |
| 880681.7 | 671060   | [29][M+2]+           | 83  |
| 1215788  | 2273203  | [702][M+2]+          | 26  |
| 40783.82 | 198764.3 | [75][M+1]+           | 319 |
| 546294.7 | 790949.5 | [M+K]+ 37!           | 229 |
| 95933704 | 1.22E+08 | [273][M+1]+          | 22  |
| 212193.4 | 320745.2 |                      | 61  |
| 3538249  | 4912999  | [292][M]+ [M+H+NH3   | 49  |
| 238290   | 480428.7 |                      | 62  |
| 566047.9 | 721625.2 | [240][M+2]+          | 106 |
| 234848.5 | 416557.2 | [1272][M+2]+         | 26  |
| 357679   | 75867.72 | [2M+3Na-t            | 75  |
| 408068.5 | 191018   | [M+2Na-H]            | 289 |
| 442762.9 | 420788.7 |                      | 281 |
| 2157139  | 2846494  | [352][M+1]+          | 2   |
| 96520.94 | 71385.34 | [73][M+1]+           | 277 |
| 1153442  | 1409366  | [1304][M+1]+         | 119 |
| 23059039 | 24436667 | [1287][M]+           | 35  |
| 46222.01 | 357398.5 |                      | 91  |
| 320990.6 | 1785359  |                      | 110 |
| 300402.1 | 168059.9 | [2M+3Na-t            | 34  |
| 13293011 | 23268945 |                      | 1   |
| 94171    | 407479.9 | [M+K]+ 32!           | 104 |
| 460243.7 | 499055.2 | [190][M+1]+          | 360 |
| 1317997  | 4552328  | [925][M+1]+          | 172 |
| 96019.59 | 1151341  | [1289][M+1]+         | 55  |
| 167576.7 | 3541668  |                      | 61  |
| 384605.5 | 190201   |                      | 390 |
| 349630.2 | 430053.2 | [1239][M+1]+         | 364 |
| 22046969 | 19667166 | [151][M]+            | 81  |

|          |          |                      |     |
|----------|----------|----------------------|-----|
| 1031200  | 456773.3 |                      | 349 |
| 685655.5 | 560994.6 | [1576][M]+           | 412 |
| 32975441 | 32127784 | [29][M]+             | 83  |
| 30902.78 | 408349.2 |                      | 290 |
| 202572.4 | 50019.62 | [M+Na]+ 7!           | 47  |
| 952187.6 | 1741561  | [M+3H-CO:            | 23  |
| 5528367  | 555329.4 | [1481][M+1]+         | 23  |
| 1415586  | 356689.5 | [46][M+1]+           | 111 |
| 1400324  | 814227.7 | [1170][M+1]2+        | 29  |
| 105287.4 | 1650060  | [990][M+2]+          | 55  |
| 199134.4 | 1181805  | [823][M+1]+          | 49  |
| 210275.1 | 104054.4 | [M+K]+ 34!           | 29  |
| 1046668  | 1810181  | [268][M+2]+          | 26  |
| 31829.17 | 119143.1 | [M+Na]+ 3!           | 88  |
| 2483407  | 2888594  | [57][M+1]+           | 104 |
| 446472.7 | 205639.6 |                      | 24  |
| 146838.6 | 872100.1 | [M+H]+ 38!           | 103 |
| 1485812  | 1324502  | [840][M+1]2+         | 301 |
| 1451882  | 1427152  | [682][M]+ [M+H]+ 42! | 75  |
| 278596.3 | 926502   | [324][M+1]+          | 169 |
| 6064158  | 8357643  |                      | 143 |
| 49529.02 | 162233   | [318][M+1]+          | 223 |
| 1545301  | 8109372  | [M+K+NaCl            | 11  |
| 539286.8 | 644839.2 |                      | 41  |
| 1378218  | 3281814  | [714][M]+ [M+Na]+ 4! | 104 |
| 15047197 | 1504587  | [1481][M]+           | 23  |
| 132159.3 | 71777.09 | [658][M+1]3+         | 62  |
| 2862802  | 1325490  | [440][M]+ [M+Na]+ 3! | 162 |
| 213537.4 | 284406.7 | [1][M+1]+            | 66  |
| 10292694 | 21474689 | [478][M+5]+          | 1   |
| 409768.2 | 198255.6 |                      | 176 |
| 322522.8 | 293007.5 | [M+Na]+ 7!           | 283 |
| 1652191  | 2196868  | [M+Na]+ 3!           | 215 |
| 127345.9 | 134599.8 | [351][M+2]+          | 151 |
| 613165.4 | 102990.7 | [1514][M+1]+         | 200 |
| 15573790 | 43150465 |                      | 263 |
| 710704.6 | 1285427  | [752][M+2]+          | 169 |
| 99794.07 | 355515.8 | [M+Na+HC             | 110 |
| 62292.18 | 576255.8 | [M+K]+ 51!           | 95  |
| 66733.44 | 175810.3 |                      | 61  |
| 506570.9 | 820979.7 |                      | 132 |
| 23316998 | 18225766 | [747][M]+ [M+H]+ 44! | 172 |
| 359078.4 | 396557   |                      | 203 |
| 518676.2 | 826290.3 |                      | 218 |
| 5.32E+08 | 1.39E+09 |                      | 1   |
| 1880716  | 2394803  | [326][M]+            | 280 |
| 1525554  | 293241.1 | [M+H]+ 63!           | 18  |

|          |          |                      |     |
|----------|----------|----------------------|-----|
| 1041228  | 772466.1 | [M+H-H20]            | 52  |
| 201820.3 | 142488.2 | [M+H-COCl            | 18  |
| 1144933  | 2351058  | [832][M+4]+          | 26  |
| 1076917  | 1226458  | [785][M]+            | 341 |
| 3424072  | 2163317  |                      | 33  |
| 982002.1 | 1167304  | [20][M+1]+           | 41  |
| 56168413 | 345571.1 |                      | 42  |
| 529464.6 | 631550.9 |                      | 273 |
| 9064158  | 43199768 | [560][M]+ [M+Na]+ 30 | 110 |
| 1989617  | 5454148  | [M+H-CH4]            | 95  |
| 2092983  | 2223456  |                      | 84  |
| 941513.4 | 655888.9 | [M+K]+ 57            | 134 |
| 618545.9 | 1282331  |                      | 248 |
| 11796769 | 52940562 | [945][M]+ [M+K]+ 47  | 49  |
| 4523926  | 14378646 |                      | 264 |
| 311727   | 410202.7 |                      | 60  |
| 167649   | 104656.4 | [M+Na]+ 2            | 110 |
| 355364.1 | 269041.2 |                      | 175 |
| 9662.122 | 46512.05 |                      | 165 |
| 492196.4 | 215042.6 | [243][M+1]+          | 61  |
| 1563560  | 285996.2 |                      | 243 |
| 170625   | 103571.5 | [M+H]+ 67            | 254 |
| 1624431  | 1728472  | [M+H]+ 28            | 143 |
| 3643721  | 5796066  | [178][M+1]+          | 127 |
| 210725.1 | 321826.1 |                      | 52  |
| 141805.5 | 248804.6 | [1106][M+1]2+        | 31  |
| 1682408  | 470198.4 |                      | 170 |
| 76707.94 | 796584.1 | [M+H-CH3]            | 24  |
| 1678225  | 624623.9 |                      | 33  |
| 416504.3 | 278516.2 |                      | 25  |
| 1731389  | 2123267  | [M+Na]+ 2            | 138 |
| 985002.8 | 326850.7 | [M+Na]+ 5            | 79  |
| 249032.2 | 566070.1 | [M+K+NH3             | 104 |
| 786988.9 | 1003889  |                      | 380 |
| 3215277  | 10466609 | [M+H+NH3             | 95  |
| 1056676  | 1077019  | [706][M+1]2+         | 243 |
| 763782.1 | 568558.5 | [M+Na]+ 3            | 341 |
| 105758.1 | 307552.3 | [275][M+1]+          | 49  |
| 60067.68 | 121763.1 |                      | 288 |
| 17272860 | 9152916  | [380][M]3+           | 1   |
| 2489623  | 3114200  | [649][M+1]+          | 37  |
| 6361450  | 6602803  |                      | 214 |
| 1828282  | 4535559  |                      | 71  |
| 203219.5 | 390134.1 | [M+2H-C3H            | 55  |
| 1849342  | 2625566  | [1008][M+2]+         | 3   |
| 390613.4 | 244334.4 |                      | 23  |
| 6555412  | 10562552 | [1008][M]+           | 3   |

|          |          |                       |     |
|----------|----------|-----------------------|-----|
| 985315.9 | 683190.7 |                       | 160 |
| 1772326  | 2212114  |                       | 264 |
| 491656.2 | 114839   | [1298][M]+ [M+H+CF3O] | 223 |
| 427920.3 | 1643033  | [1161][M+2]+          | 49  |
| 2581929  | 1200220  | [2M+H+Na              | 29  |
| 414196.3 | 104741.5 |                       | 94  |
| 147209.6 | 191095.5 | [574][M+1]+           | 84  |
| 1130207  | 3101724  |                       | 1   |
| 12618108 | 22822754 |                       | 1   |
| 2672910  | 5190626  | [1134][M]2+           | 70  |
| 20025036 | 20345051 | [895][M+1]+           | 84  |
| 720482.4 | 901494.5 | [M+2H-CH <sub>3</sub> | 100 |
| 12493758 | 15425463 | [828][M]2+            | 2   |
| 77496217 | 20909969 | [768][M]+             | 71  |
| 471017.6 | 753796.3 |                       | 3   |
| 45601.77 | 115487.7 |                       | 61  |
| 160474.5 | 202223.5 |                       | 268 |
| 1148895  | 734505.4 | [M+K]+ 278            | 238 |
| 974343   | 1090779  |                       | 419 |
| 8609854  | 8332258  | [750][M]+             | 2   |
| 579299.7 | 57820.48 | [976][M+1]+           | 226 |
| 100131.9 | 113166.8 |                       | 176 |
| 274276.4 | 442328.2 | [M+K+HCO              | 29  |
| 9790009  | 11231203 | [M+2H-NH <sub>2</sub> | 160 |
| 2302215  | 1105028  |                       | 25  |
| 168778.9 | 142632.9 | [1127][M+1]2+         | 18  |
| 1501135  | 924168.4 | [1006][M]+            | 32  |
| 1458592  | 1650082  | [316][M]+             | 19  |
| 241464.2 | 432614.3 | [M+H]+ 361            | 11  |
| 1013228  | 934092.9 |                       | 232 |
| 424762.1 | 460115.6 | [694][M+2]+           | 218 |
| 462287.8 | 338786.6 |                       | 119 |
| 1388022  | 1050127  |                       | 355 |
| 1904076  | 6384813  |                       | 49  |
| 210247.4 | 607566.9 | [71][M+1]+            | 279 |
| 1526840  | 1389322  | [M+H-COCl             | 217 |
| 373042   | 204892.1 |                       | 302 |
| 779674.5 | 1149649  | [2M+H]+ 41            | 26  |
| 1103291  | 539321   | [813][M+2]+           | 123 |
| 430562.2 | 312152.6 | [M+Na]+ 31            | 119 |
| 12210173 | 9933004  | [189][M+1]+           | 61  |
| 596737   | 209828.9 |                       | 268 |
| 257020.6 | 113207.8 |                       | 81  |
| 1594354  | 3672869  |                       | 5   |
| 451357.9 | 668908.2 |                       | 20  |
| 189503.5 | 351848.9 | [M+2H]2+ 1            | 116 |
| 1.05E+08 | 688224.9 | [M+Na+HC              | 23  |

|          |          |                       |     |
|----------|----------|-----------------------|-----|
| 38664.45 | 348344.8 | [M+H-H20]             | 103 |
| 353064.3 | 106761   | [M+H]+ 33:            | 159 |
| 218605.5 | 211102.8 | [785][M+1]+           | 341 |
| 14489150 | 4095058  | [46][M]+              | 111 |
| 182935   | 210849.5 | [1516][M+2]+          | 32  |
| 683192.2 | 721831.4 | [1160][M+1]2+         | 70  |
| 557593.3 | 593178.7 |                       | 170 |
| 2563385  | 1639496  | [83][M]+              | 118 |
| 198276.1 | 187893   |                       | 142 |
| 677099.9 | 919917.3 | [1062][M+1]+          | 22  |
| 1394933  | 2016485  | [M+K]+ 514            | 341 |
| 450421.6 | 528765.6 |                       | 83  |
| 2406548  | 2099057  | [687][M+1]+           | 90  |
| 16858723 | 76812483 |                       | 67  |
| 1628539  | 376212.8 | [M+H]+ 400            | 55  |
| 10508464 | 21922910 | [994][M]+             | 138 |
| 441266.8 | 774803.6 |                       | 347 |
| 135060.5 | 145727.6 | [M+K+NH3              | 103 |
| 1445705  | 139096.9 | [M+K+HCO              | 18  |
| 436154.4 | 376264.9 |                       | 427 |
| 2382600  | 1892027  | [111][M+1]+           | 83  |
| 145054.3 | 1647857  | [M+K]+ 348            | 178 |
| 2791429  | 3165151  | [32][M+1]+            | 19  |
| 236540.5 | 200337.1 | [104][M+1]+           | 27  |
| 807983.5 | 495742.2 |                       | 47  |
| 578644.8 | 562054.8 |                       | 71  |
| 257806.5 | 189385.2 |                       | 62  |
| 466617.3 | 982409.2 |                       | 77  |
| 936889.4 | 790800.8 |                       | 119 |
| 98060.05 | 464954.9 |                       | 144 |
| 111253.2 | 1018775  |                       | 1   |
| 758775   | 504900.7 |                       | 25  |
| 1043108  | 872119.4 | [58][M+1]+            | 261 |
| 426960.3 | 395531.6 |                       | 178 |
| 86412.21 | 102712.7 |                       | 46  |
| 231119.7 | 774509.1 | [444][M+2]+           | 83  |
| 42415.95 | 576615.8 |                       | 97  |
| 305690.5 | 1501916  | [M+H+HCC              | 49  |
| 82408.42 | 205092.7 | [1544][M+1]+          | 23  |
| 570608.9 | 1151503  |                       | 64  |
| 304631.1 | 4913737  | [1463][M]+ [M+K]+ 748 | 95  |
| 228425.3 | 394544.7 |                       | 110 |
| 290510.3 | 301954.7 | [M+2H]2+ :            | 31  |
| 263933.7 | 89442.5  |                       | 18  |
| 79378.39 | 962603   |                       | 166 |
| 12919814 | 12092293 | [M+H]+ 34:            | 143 |
| 189331.7 | 388783.1 |                       | 292 |

|          |          |                      |     |
|----------|----------|----------------------|-----|
| 5067455  | 7134420  | [M+K+CF3C            | 341 |
| 698054.4 | 275759.1 |                      | 357 |
| 4791135  | 68043.16 | [467][M+1]+          | 248 |
| 242952.3 | 287094.8 |                      | 289 |
| 108207.5 | 204672   |                      | 41  |
| 293393.3 | 625781.6 |                      | 238 |
| 668817.7 | 832292.8 |                      | 437 |
| 4358158  | 1730621  | [1425][M]+           | 198 |
| 347532.2 | 321264.2 | [1309][M+1]+         | 364 |
| 98415.73 | 318775.9 | [2M+2Na+I            | 49  |
| 413652.9 | 215542.7 | [M+Na]+ 1:           | 40  |
| 14092298 | 10470429 | [809][M+1]+          | 107 |
| 281512.6 | 485257.1 |                      | 470 |
| 30378688 | 40268194 | [613][M]+ [M+H]+ 40! | 160 |
| 847479.7 | 2599783  |                      | 2   |
| 782354.9 | 1037175  |                      | 104 |
| 2633893  | 2817912  | [M+H-CH3]            | 169 |
| 1321223  | 3214215  | [M+2H]2+ !           | 49  |
| 2908272  | 2375215  | [1270][M+1]+         | 95  |
| 61261.51 | 1306671  |                      | 374 |
| 276419.3 | 315907.8 | [M+H]+ 39!           | 104 |
| 362914.3 | 5876927  | [1142][M+1]+         | 55  |
| 1751239  | 1622763  | [750][M+1]+          | 2   |
| 498614   | 1101003  |                      | 63  |
| 967469.6 | 1290398  | [564][M+1]+          | 217 |
| 43200.12 | 181532.1 | [1161][M+3]+         | 49  |
| 1994311  | 627018.6 |                      | 199 |
| 185817.4 | 238330.1 | [3M+K]+ 2:           | 104 |
| 2300863  | 703710.1 | [M+H-C4H8            | 23  |
| 1429155  | 641856.4 | [M+H-H2O]            | 11  |
| 1335637  | 11573601 |                      | 1   |
| 131789   | 311433.7 | [312][M+1]+          | 292 |
| 318101.4 | 597426.9 | [714][M+1]+          | 104 |
| 158670.1 | 125223.9 |                      | 66  |
| 370302.3 | 815813.6 | [M+H-HCO             | 119 |
| 748225   | 136119.1 |                      | 355 |
| 510447.7 | 1328428  | [832][M+3]+          | 26  |
| 901640.4 | 2907235  |                      | 362 |
| 52476.26 | 100204   |                      | 169 |
| 1702814  | 2607073  |                      | 20  |
| 1566416  | 616761.1 |                      | 244 |
| 2290856  | 2037408  | [645][M+2]+          | 52  |
| 539202.9 | 1267301  |                      | 10  |
| 842149.8 | 451099.2 | [M+H]+ 33:           | 104 |
| 4337039  | 9144546  |                      | 323 |
| 2126700  | 23508302 | [1142][M]+           | 55  |
| 120207.1 | 110567.4 |                      | 433 |

|          |          |                     |     |
|----------|----------|---------------------|-----|
| 6369351  | 10055440 | [239][M+1]+         | 86  |
| 2382541  | 1399661  |                     | 100 |
| 1218166  | 4901229  | [934][M]+           | 49  |
| 0        | 1240827  | [M+Na]+ 20          | 180 |
| 15765019 | 5624523  |                     | 1   |
| 1296663  | 7511244  | [560][M+1]+         | 110 |
| 39553262 | 60864309 | [239][M]+ [M+K]+ 26 | 86  |
| 15499598 | 25237404 |                     | 61  |
| 144758.2 | 159033.5 | [M+K]+ 22           | 116 |
| 2990176  | 656828.3 | [M+Na]+ 6           | 18  |
| 702456.8 | 683339.2 |                     | 143 |
| 311043.2 | 259064.9 |                     | 176 |
| 265095.4 | 454005.9 |                     | 204 |
| 977280.1 | 1121806  | [1384][M]+          | 104 |
| 714268.5 | 556993   |                     | 355 |
| 7648453  | 4918977  |                     | 107 |
| 226837.8 | 281009.7 |                     | 81  |
| 180177.3 | 335398.3 | [805][M+2]+         | 116 |
| 158253.9 | 523670.2 | [250][M+1]+         | 90  |
| 373463.9 | 1392286  |                     | 136 |
| 708717.2 | 873260.2 | [M+Na]+ 2           | 244 |
| 7883058  | 2432339  | [1194][M+1]+        | 133 |
| 809646.9 | 1002959  |                     | 349 |
| 1245465  | 1672038  | [202][M+2]+         | 41  |
| 2082667  | 1770584  |                     | 83  |
| 6353.152 | 246790.1 | [M+Na]+ 3           | 199 |
| 25956763 | 89771797 |                     | 1   |
| 3883179  | 16681027 | [1068][M]+ [M+H+HCC | 49  |
| 7583829  | 11523117 | [390][M]+           | 78  |
| 1598585  | 1470410  |                     | 2   |
| 3161415  | 2213805  | [M+H]+ 33           | 312 |
| 114302.1 | 240112.8 | [M+2K-H]+           | 75  |
| 1571766  | 3387655  | [1297][M]+          | 10  |
| 22990399 | 25812357 | [57][M]+ [M+H]+ 22  | 104 |
| 285420.5 | 280060.8 |                     | 47  |
| 338943.2 | 109756.9 |                     | 257 |
| 622272.5 | 3007077  |                     | 303 |
| 2367155  | 2786893  | [30][M]+            | 106 |
| 453562.4 | 416948.8 |                     | 443 |
| 904326.9 | 698881.8 | [M+2Na]2+           | 100 |
| 402900.5 | 1122582  |                     | 129 |
| 19869162 | 31304391 |                     | 82  |
| 1008142  | 1898622  | [1244][M+2]+        | 12  |
| 636643.1 | 586091.9 | [M+H-CH4]           | 173 |
| 179560.3 | 329784.1 |                     | 255 |
| 1539660  | 1115782  |                     | 176 |
| 2298070  | 2420046  | [M+Na]+ 5           | 60  |



|          |          |                      |     |
|----------|----------|----------------------|-----|
| 476707.5 | 136287   |                      | 325 |
| 347916.1 | 1035752  |                      | 229 |
| 255536.7 | 495718.8 | [752][M+4]+          | 169 |
| 2878229  | 6465489  | [994][M+1]+          | 138 |
| 719321.3 | 191763.7 | [M+2K]2+ 6           | 29  |
| 88183.03 | 27616.16 | [M+H-C5H8            | 64  |
| 0        | 5710382  |                      | 394 |
| 2935206  | 7146477  | [832][M+2]+          | 26  |
| 6987320  | 5426577  |                      | 171 |
| 692097.7 | 882037.1 | [M+Na+K+1            | 22  |
| 991899.1 | 892644   |                      | 13  |
| 194626.8 | 429702.1 |                      | 19  |
| 975632.3 | 1237450  | [M+K+HCO             | 264 |
| 69328.32 | 218903.9 | [M+H]+ 41!           | 103 |
| 994503.4 | 677251.3 | [713][M+1]+          | 188 |
| 308904.5 | 277918.6 | [1107][M+2]+         | 107 |
| 36549773 | 67249221 |                      | 7   |
| 4158157  | 2894543  | [116][M+1]+          | 61  |
| 1782691  | 2628690  | [454][M]+            | 78  |
| 8810.027 | 418614.6 |                      | 55  |
| 1662323  | 2890738  | [324][M]+            | 169 |
| 170548.9 | 620065.3 | [M+Na]+ 4!           | 49  |
| 1520649  | 3204744  | [61][M]+             | 116 |
| 242176.8 | 346882.6 |                      | 279 |
| 150351.3 | 214179.4 | [1384][M+1]+         | 104 |
| 80358.77 | 212868   |                      | 425 |
| 491012.1 | 287558.1 |                      | 29  |
| 58716647 | 78659128 | [1266][M+1]+         | 10  |
| 236274.6 | 1073978  | [2M+Na]+ 1           | 55  |
| 916372.7 | 1130273  | [M+Na]+ 5!           | 88  |
| 289981.6 | 6393233  |                      | 171 |
| 136426.9 | 427168.5 |                      | 10  |
| 192578.2 | 356170.6 | [M+H]+ 26!           | 55  |
| 2157274  | 1997879  | [957][M]+ [M+H]+ 51! | 75  |
| 405563.1 | 571338.7 | [2M+Na+K]            | 4   |
| 314281.5 | 594121.3 |                      | 61  |
| 7832567  | 11679130 | [543][M+1]+          | 11  |
| 65675.75 | 637526.6 | [64][M+1]+           | 49  |
| 148040.9 | 126851.4 | [368][M+1]2+         | 254 |
| 9823384  | 5448560  | [918][M]+ [M+Na]+ 4! | 76  |
| 764105.2 | 937060.4 | [M+Na]+ 3!           | 100 |
| 801868.4 | 3527828  | [1068][M+1]+         | 49  |
| 231254.8 | 190111.5 | [996][M+2]+          | 261 |
| 528161.5 | 257238.1 | [1212][M+1]+         | 25  |
| 21270.71 | 434360.4 | [M+K]+ 55!           | 11  |
| 152565.9 | 182447.6 | [245][M+1]+          | 119 |
| 881424.4 | 649921.1 |                      | 66  |

|          |          |                      |     |
|----------|----------|----------------------|-----|
| 2885697  | 3345913  | [304][M]+            | 41  |
| 136234.5 | 2079416  |                      | 55  |
| 5128.947 | 272517.6 | [900][M+1]+          | 178 |
| 761692.2 | 1155101  |                      | 103 |
| 6609521  | 8838603  | [613][M+1]+          | 160 |
| 732107.9 | 695922.1 | [713][M+2]+          | 188 |
| 96576.73 | 691198.7 | [1142][M+2]+         | 55  |
| 2171894  | 5812162  |                      | 11  |
| 179813.6 | 2290817  | [M+K]+ 584           | 55  |
| 427604.9 | 56708.55 | [1017][M+1]+         | 318 |
| 780706.1 | 921669   |                      | 63  |
| 13857.42 | 419318   | [3M+2H]2+            | 49  |
| 2559869  | 2720696  | [1050][M+1]+         | 60  |
| 719687.6 | 969933.5 |                      | 11  |
| 181828.3 | 209406.1 | [909][M+1]+          | 88  |
| 360477.9 | 805490.5 | [269][M+3]+          | 103 |
| 1358611  | 8713081  | [424][M]+ [M+Na]+ 3: | 178 |
| 75994.81 | 155617.7 | [M+H]+ 304           | 86  |
| 7213301  | 8845621  | [273][M+2]+          | 22  |
| 1603659  | 8127570  | [823][M]+            | 49  |
| 247620.7 | 309655.6 | [1576][M+1]+         | 412 |
| 183815.8 | 173038.6 | [2M+Na]+ :           | 116 |
| 1433091  | 2213378  | [1008][M+1]+         | 3   |
| 342363.7 | 322487.5 |                      | 298 |
| 1925774  | 10975235 | [945][M+1]+          | 49  |
| 130310.5 | 171414.1 | [2M+Na]+ :           | 26  |
| 2658636  | 639298.6 | [M+Na+CF:            | 309 |
| 99360.77 | 165756.3 |                      | 66  |
| 8233126  | 10331259 | [749][M+2]+          | 2   |
| 2638911  | 1349460  | [1195][M]2 [2M+Na+2I | 29  |
| 2583910  | 3616790  | [1062][M]+           | 22  |
| 66456.22 | 217020.3 | [179][M+1]+          | 104 |
| 97090.56 | 202345.3 | [1092][M+1]+         | 284 |
| 550308.1 | 797710.7 |                      | 19  |
| 93833965 | 65487965 | [982][M]+            | 120 |
| 360063.8 | 747333.1 | [279][M+1]+          | 65  |
| 7577554  | 9770485  |                      | 170 |
| 284444   | 459165.8 | [513][M]+ [M+H]+ 37: | 17  |
| 2563441  | 2920433  |                      | 97  |
| 297149.5 | 281625.3 | [1265][M]2 [M+H+Na]: | 202 |
| 221839.3 | 318586.3 |                      | 119 |
| 11559352 | 8340012  | [569][M+3]+          | 100 |
| 15385975 | 13382012 |                      | 16  |
| 2119287  | 3099919  | [1134][M+1]2+        | 70  |
| 9669396  | 4007365  | [346][M]+ [M+Na]+ 3: | 16  |
| 1480768  | 567635.4 | [1051][M+1]2+        | 25  |
| 489356.9 | 585227.8 | [512][M+1]+          | 244 |

|          |          |                         |     |
|----------|----------|-------------------------|-----|
| 76683599 | 79476803 | [895][M]+               | 84  |
| 556147.9 | 482818.7 |                         | 41  |
| 12482547 | 11327494 | [196][M]+               | 81  |
| 7586946  | 6070218  | [1270][M]+              | 95  |
| 161126.9 | 367284.1 | [592][M+2]+             | 116 |
| 2454846  | 2692777  | [430][M+2]+             | 100 |
| 313266.2 | 292656.2 | [1115][M+2]+            | 41  |
| 1136298  | 857381.6 | [660][M+1]+             | 168 |
| 2273284  | 1476094  |                         | 339 |
| 225389.8 | 375708.7 | [M+H]+ 150              | 289 |
| 873133   | 620820   |                         | 297 |
| 203368.2 | 747042.7 | [M+2Na-H]               | 83  |
| 1483621  | 1254836  |                         | 313 |
| 556482.5 | 2118170  |                         | 372 |
| 330109.7 | 621805.9 | [891][M+1]+             | 37  |
| 1362588  | 906057.6 | [2M+Na+2I]              | 47  |
| 65299.61 | 273884.5 | [2M+Na]+ 1              | 133 |
| 225362.4 | 317909.1 |                         | 177 |
| 1520355  | 379411.6 | [1159][M+2]+            | 133 |
| 1699575  | 1611838  | [1036][M]+              | 3   |
| 3292009  | 4964806  | [841][M]+ [M+K]+ 438    | 127 |
| 1687034  | 881011.6 |                         | 211 |
| 104738.2 | 31944.27 | [M+H]+ 700              | 321 |
| 666608.6 | 402285.4 | [484][M+2]+             | 297 |
| 422194.9 | 460386.2 |                         | 273 |
| 67823.63 | 372552.9 |                         | 302 |
| 43939.08 | 677544.4 | [M+Na+CF <sub>3</sub> ] | 178 |
| 80486.87 | 872425.2 | [M+K]+ 524              | 26  |
| 775171.6 | 621157.9 | [M+Na]+ 51              | 275 |
| 329723.3 | 126194.4 |                         | 223 |
| 238220.1 | 287708   | [1403][M+1]+            | 214 |
| 680329.8 | 673171.9 | [M+H+HCC]               | 237 |
| 1.43E+08 | 73827072 | [2M+Na+2I]              | 18  |
| 1965897  | 2323382  |                         | 2   |
| 1757541  | 2421828  | [749][M+3]+             | 2   |
| 798295.7 | 698747   | [17][M+1]+              | 156 |
| 350198.1 | 600050.8 | [M+K]+ 160              | 55  |
| 20026049 | 43989264 |                         | 199 |
| 78196234 | 142867   |                         | 68  |
| 235442.5 | 1984514  |                         | 49  |
| 8860569  | 10444101 | [7][M]+                 | 22  |
| 3350449  | 2334470  | [1000][M]+ [M+Na]+ 50   | 212 |
| 4512021  | 3638464  |                         | 139 |
| 1738284  | 1437358  |                         | 405 |
| 26816861 | 32944664 | [514][M]+ [M+Na]+ 30    | 16  |
| 268508.4 | 1390667  | [516][M+1]+             | 72  |
| 694361.8 | 532855.6 | [867][M+3]+             | 391 |

|          |          |                      |     |
|----------|----------|----------------------|-----|
| 153386   | 3382280  |                      | 6   |
| 3115235  | 2581853  | [151][M+1]+          | 81  |
| 404480.2 | 514999.9 | [1192][M+1]+         | 2   |
| 2579223  | 961821.5 | [M+Na]+ 3:           | 4   |
| 147994   | 117044.2 |                      | 63  |
| 161841.7 | 266890.7 | [752][M+3]+          | 169 |
| 67937.12 | 1381253  | [1433][M]+ [M+K+CF3C | 55  |
| 352370   | 240475.7 | [445][M+1]+          | 175 |
| 297322.4 | 3871706  | [3M+Na+K·            | 55  |
| 262847   | 732779.3 |                      | 69  |
| 66461.77 | 43380.3  | [484][M+3]+          | 297 |
